# Supplementary material for: Lupus nephritis is linked to disease-activity associated expansions and immunity to a gut commensal
Source: PubMed Central journal article supplement — Ann Rheum Dis. 2019 Feb 19;78(7):947–56. doi: 10.1136/annrheumdis-2018-214856 (PMC6585303; doi:10.1136/annrheumdis-2018-214856), 2019-02-19
Supplement: annrheumdis-2018-214856supp006.pdf [file annrheumdis-2018-214856supp006.pdf]

Supplementary Table 4. Representation of ASV in fecal microbiomes

>ASV:1:Species:vulgatus  
TACGGAGGATCCGAGCGTTATCCGGATTTATTGGGTTTAAAGGGAGCGTAGATGGATGTTTAAAGTCAGTTGTGAAAAGTTT  
GCGGCTCAACCGTAAAATTGCAGTTGATACTGGATATCTTGAGTGCAGTTGAGGCAGCGGAATTCGTGGTGTAGCGGTG  
AAATGCTTAGATATCACGAAGAAGCTCCGATTGCGAAGGCAGCCTGCTAAGCTGCAACTGACATTGAGGCTCGAAAAGTGTG  
GGTAT

>ASV:2:Species:invisus  
TACGTAGGTGGCAAGCGTTGTCCGGAATTATTGGGCGTAAAGCGCGCAGGCGGCTTCCCAAGTCCCTCTTAAAAGTGC  
GGGGCTTAACCCCGTATGGGAAGGAACTGGGAAGCTGGAGTATCGGAGAGGAAAGTGAATTCTAGTGTAGCGGTGA  
AATGCGTAGAGATTAGGAAGAACACCGGTGGCGAAGGCGACTTCTTGACGAAAAGTACGCTGAGGCGGAAAAGCGTGG  
GGAG

>ASV:3:Species:cf./prausnitzii  
AACGTAGGTCAACGCGTTGTCCGGAATTACTGGGTGTAAGGGAGCGCAGGCGGGAAGACAAGTTGGAAGTGAATCTA  
TGGGCTCAACCCATAAACTGCTTTCAAAGTGTCTTCTTGAGTAGTGCAGAGGTAGCGGAATTCCTGGTGTAGCGGTG  
GAATGCGTAGATATCGGGAGGAACACCACTGCGGCGAAGGCGGCTACTGGGCACCAACTGACGCTGAGGCTCGAAAAGTGTG  
GGTAG

>ASV:4:Species:muciniphila  
TACAGAGGTCTCAAGCGTTGTCCGGAATCACTGGGCGTAAAGCGTGCCTAGGCTGTTTCGTAAGTCTGTGTGAAAAGCGG  
CGGGCTCAACCCGCGGACGGCAGTATGATACTGCGAGACTAGAGTAATGGAGGGGAAACCGGAATTCCTGGTGTAGCAGTG  
AAATGCGTAGATATCGAGAGGAACACTGCTGGCGAAGGCGGGTCTTGACATTAAGTACGCTGAGGCACGAAGGCCAG  
GGAG

>ASV:5:Genus:Agathobacter  
TACGTATGGTCAAGCGTTATCCGGATTTACTGGGTGTAAGGGAGCGCAGGCGGTGCGGCAAGTCTGATGTGAAAAGCCC  
GGGGCTCAACCCCGGTACTGCATTGGAAGTGTCTGACTAGAGTGTGCGAGGGTAAGCGGAATTCCTAGTGTAGCGGTG  
AAATGCGTAGATATTAGGAGGAACACCACTGCGGCGAAGGCGGCTACTGGACGATAACTGACGCTGAGGCTCGAAAAGCGTG  
GGAG

>ASV:6:Species:dorei/vulgatus  
TACGGAGGATCCGAGCGTTATCCGGATTTATTGGGTTTAAAGGGAGCGTAGATGGATGTTTAAAGTCAGTTGTGAAAAGTTT  
GCGGCTCAACCGTAAAATTGCAGTTGATACTGGATGTCTTGAGTGCAGTTGAGGCAGCGGAATTCGTGGTGTAGCGGTG  
AAATGCTTAGATATCACGAAGAAGCTCCGATTGCGAAGGCAGCCTGCTAAGCTGCAACTGACATTGAGGCTCGAAAAGTGTG  
GGTAT

>ASV:7:Species:CM04-06  
AACGTAGGTCAACGCGTTGTCCGGAATTACTGGGTGTAAGGGAGCGCAGGCGGGAGAACAAAGTTGGAAGTGAATCCA  
TGGGCTCAACCCATGAAGTGTCTTTCAAAGTGTCTTCTTGAGTAGTGCAGAGGTAGCGGAATTCCTGGTGTAGCGGTG  
GAATGCGTAGATATCGGGAGGAACACCACTGCGGCGAAGGCGGCTACTGGGCACCAACTGACGCTGAGGCTCGAAAAGTGTG  
GGTAG

>ASV:8:Genus:Subdoligranulum  
AACGTAGGGTCAAGCGTTGTCCGGAATTACTGGGTGTAAGGGAGCGCAGGCGGACCGGCAAGTTGGAAGTGAAGTGA  
TGGGCTCAACCCATAAATTGCTTTCAAAGTGTCTGCGCTTGGTGTAGTGCAGAGGTAGGTGGAATTCCTGGTGTAGCGGTG  
GAATGCGTAGATATCGGGAGGAACACCACTGCGGCGAAGGCGACTACTGGGCACCAACTGACGCTGAGGCTCGAAAAGCATG  
GGTAG

>ASV:9:Species:dorei/stercoris  
TACGGAGGATCCGAGCGTTATCCGGATTTATTGGGTTTAAAGGGAGCGTAGGCGGGTGTAAAGTCAAGTTGTGAAAAGTTT  
GCGGCTCAACCGTAAAATTGCAGTTGATACTGGCGACTTGGTGTAGTGCAGAGGTAGGCGGAATTCGTGGTGTAGCGGTG  
AAATGCTTAGATATCACGAAGAAGCTCCGATTGCGAAGGCAGCTTACTGGATTGTAAGTACGCTGATGCTCGAAAAGTGTG  
GGTAT

>ASV:10:Genus:Subdoligranulum  
AACGTAGGGTCAAGCGTTGTCCGGAATTACTGGGTGTAAGGGAGCGCAGGCGGGAAGACAAGTTGGAAGTGAAGTGA  
TGGGCTCAACCCATGAATTGCTTTCAAAGTGTCTTCTTGAGTAGTGCAGAGGTAGATGGAATTCCTGGTGTAGCGGTG  
GAATGCGTAGATATCGGGAGGAACACCACTGCGGCGAAGGCGGCTACTGGGCACCAACTGACGCTGAGGCTCGAAAAGCATG  
GGTAG

>ASV:11:Family:Lachnospiraceae  
TACGTATGGTCAAGCGTTATCCGGATTTACTGGGTGTAAGGGAGCGTAGACGGATGGGCAAGTCTGATGTGAAAAGCCC  
GGGGCTCAACCCCGGACTGCATTGGAAGTGTTCATCTAGAGTGTGGAGAGGTAGTGAATTCCTAGTGTAGCGGTG  
AAATGCGTAGATATTAGGAGGAACACCACTGCGGCGAAGGCGGCTACTGGACAGTAAGTACGCTTGGGCTCGAAAAGCGTG  
GGAG

>ASV:12:Species:breve/kashiwanohense/longum  
TACGTAGGGTCAAGCGTTATCCGGAATTATTGGGCGTAAAGGGCTCGTAGGCGGTTCTGTCGCTCCGGTGTGAAAAGTCC  
ATCGCTTAACCGTGGATCCGCGCCGGTACGGGCGGCTTGGTGTAGTGCAGAGGTAGGCGGAATTCCTGGTGTAGCGGTG  
GAATGCTTAGATATCGGGAAGAACACCAATGGCGAAGGCAGTCTCTGGGCCGTTACTGACGCTGAGGAGCGAAAAGCGTG  
GGAG

>ASV:13:Species:catenulatum/gallicum/kashiwanohense/pseudocatenulatum  
TACGTAGGGTCAAGCGTTATCCGGAATTATTGGGCGTAAAGGGCTCGTAGGCGGTTCTGTCGCTCCGGTGTGAAAAGTCC  
ATCGCTTAACCGTGGATCTGCGCCGGTACGGGCGGCTGGAGTGCAGTGGGAGACTGGAATTCCTGGTGTAGCGGTG  
GAATGCTTAGATATCGGGAAGAACACCAATGGCGAAGGCAGTCTCTGGGCCGTTACTGACGCTGAGGAGCGAAAAGCGTG  
GGAG

>ASV:14:Species:fingoldii/onderdonkii

TACGGAGGATTCAAGCGTTATCCGGATTTATTGGGTTTAAAGGGTGCCTAGGCGGTTTGATAAGTTAGAGGTGAAATCCC  
GGGGCTTAACTCCGGAAGTGCCTCTAATACTGTTAGACTAGAGAGTAGTTGCGGTAGGCGGAATGTATGGTGTAGCGGTG  
AAATGCTTAGAGATCATACAGAACCACCGATTGCGAAGGCAGCTTACCAAATATATCTGACGTTGAGGCACGAAAGCGTG  
GGGAG

>ASV:15:Species:fragilis/ovatus

TACGGAGGATCCGAGCGTTATCCGGATTTATTGGGTTTAAAGGGAGCGTAGGTGGATTGTTAAGTCAGTTGTGAAAGTTT  
GCGGCTCAACCGTAAAATTGCAAGTTGAAACTGGCAGTCTTGAGTACAGTAGAGGTGGGCGGAATTCGTGGTGTAGCGGTG  
AAATGCTTAGATATCACGAAGAAGTCCGATTGCGAAGGCAGCTCACTAGACTGTTACTGACACTGATGCTCGAAAGTGTG  
GGTAT

>ASV:16:Species:copri

TACGGAAAGTCCGGGCGTTATCCGGATTTATTGGGTTTAAAGGGAGCGTAGGCCGGAGATTAAGCGTGTGTGAAATGTA  
GACGCTCAACGCTGCACTGCAAGCGCAACTGGTTTCTTGAGTACGCACAAAGTGGGCGGAATTCGTGGTGTAGCGGTG  
AAATGCTTAGATATCACGAAGAAGTCCGATTGCGAAGGCAGCTCACTGGAGCGCAACTGACGCTGAAGCTCGAAAGTGGC  
GGTAT

>ASV:17:Species:bicirculans

TACGTAGGGAGCGAGCGTTGTCGGGAATTACTGGGTGTAAAGGGAGCGTAGGCCGGGATCGCAAGTCAGATGTGAAACTA  
TGGGCTTAAACCATAAACTGCATTTGAAACTGTGGTCTTGAGTGAAGTAGAGGTAGGCGGAATTCCTAGTGTAGCGGTG  
AAATGCGTAGATATTAGGAGGAACATCAGTGGCGAAGGCGGCTTACTGGGCTTAACTGACGCTGAGGCTCGAAAGCGTG  
GGGAG

>ASV:18:Species:obeum/provencensis/wexlerae

TACGTAGGGGCAAGCGTTATCCGGATTTACTGGGTGTAAAGGGAGCGTAGACGGTGTGGCAAGTCTGATGTGAAAGGCA  
TGGGCTCAACCTGTGGACTGCATTGAAACTGTCATACTTGAGTGCCGGAGGGGTAGGCGGAATTCCTAGTGTAGCGGTG  
AAATGCGTAGATATTAGGAGGAACACAGTGGCGAAGGCGGCTTACTGGACGTAACGACGTTGAGGCTCGAAAGCGTG  
GGGAG

>ASV:19:Species:prausnitzii

AACGTAGGTCACAAGCGTTGTCGGGAATTACTGGGTGTAAAGGGAGCGCAGGCGGGAAGACAAGTTGGAAGTAAATCCA  
TGGGCTCAACCATGAACTGCTTTCAAACCTGTTTTCTTGAGTAGTGCAGAGGTAGGCGGAATTCCTGGTGTAGCGGTG  
GAATGCGTAGATATCCGGAGGAACACAGTGGCGAAGGCGGCTTACTGGGCACCAACTGACGCTGAGGCTCGAAAGTGTG  
GGTAG

>ASV:20:Species:fragilis/ovatus/xylanisolvens

TACGGAGGATCCGAGCGTTATCCGGATTTATTGGGTTTAAAGGGAGCGTAGGTGGATTGTTAAGTCAGTTGTGAAAGTTT  
GCGGCTCAACCGTAAAATTGCAAGTTGAAACTGGCAGTCTTGAGTACAGTAGAGGTGGGCGGAATTCGTGGTGTAGCGGTG  
AAATGCTTAGATATCACGAAGAAGTCCGATTGCGAAGGCAGCTCACTAGACTGCAACTGACACTGATGCTCGAAAGTGTG  
GGTAT

>ASV:21:Species:uniformis

TACGGAGGATCCGAGCGTTATCCGGATTTATTGGGTTTAAAGGGAGCGTAGGCCGACGCTTAAAGTCAGTTGTGAAAGTTT  
GCGGCTCAACCGTAAAATTGCAAGTTGAAACTGGTGTCTTGAGTACAGTAGAGGTGGGCGGAATTCGTGGTGTAGCGGTG  
AAATGCTTAGATATCACGAAGAAGTCCGATTGCGAAGGCAGCTTACTGGACTGTAACGACGCTGATGCTCGAAAGTGTG  
GGTAT

>ASV:22:Species:merdae

TACGGAGGATGCGAGCGTTATCCGGATTTATTGGGTTTAAAGGGAGCGTAGGTGGTATTAAAGTCAGCGGTGAAAGTTT  
GTGGCTCAACCGTAAAATTGCAAGTTGAAACTGGTGTCTTGAGTGTGTTGAGGTAGGCGGAATTCGTGGTGTAGCGGTG  
AAATGCATAGATATCACGCAGAAGTCCGATTGCGAAGGCAGCTTACTAAACCATAACTGACACTGAAGCACGAAAGCGTG  
GGGAT

>ASV:23:Species:dorei/fragilis

TACGGAGGATCCGAGCGTTATCCGGATTTATTGGGTTTAAAGGGAGCGTAGGTGGACTGGTAAGTCAGTTGTGAAAGTTT  
GCGGCTCAACCGTAAAATTGCAAGTTGAAACTGGTGTCTTGAGTACAGTAGAGGTGGGCGGAATTCGTGGTGTAGCGGTG  
AAATGCTTAGATATCACGAAGAAGTCCGATTGCGAAGGCAGCTCACTGGACTGCAACTGACACTGATGCTCGAAAGTGTG  
GGTAT

>ASV:24:Species:faeichinchillae/faeicis/fingoldii/thetaiotaomicron

TACGGAGGATCCGAGCGTTATCCGGATTTATTGGGTTTAAAGGGAGCGTAGGTGGACAGTTAAGTCAGTTGTGAAAGTTT  
GCGGCTCAACCGTAAAATTGCAAGTTGAAACTGGTGTCTTGAGTACAGTAGAGGTGGGCGGAATTCGTGGTGTAGCGGTG  
AAATGCTTAGATATCACGAAGAAGTCCGATTGCGAAGGCAGCTCACTGGACTGCAACTGACACTGATGCTCGAAAGTGTG  
GGTAT

>ASV:25:Genus:Ruminococcus\_2

TACGTAGGGAGCAAGCGTTGTCGGATTTACTGGGTGTAAAGGGTGCCTAGGCCGCTTTCGAAGTCAGATGTGAAATCTA  
TGGGCTCAACCGTAAAGTGCATTTGAAACTGCAGAGCTTGAGTGAAGTAGAGGCAGGCGGAATTCCTCGTGTAGCGGTG  
AAATGCTTAGAGATGGGAGGAACACAGTGGCGAAGGCGGCTGCTGGGCTTAACTGACGCTGAGGCACGAAAGCGTG  
GGTAG

>ASV:26:Species:fragilis/ovatus

TACGGAGGATCCGAGCGTTATCCGGATTTATTGGGTTTAAAGGGAGCGTAGGTGGATTGTTAAGTCAGTTGTGAAAGTTT  
GCGGCTCAACCGTAAAATTGCAAGTTGAAACTGGCAGTCTTGAGTACAGTAGAGGTGGGCGGAATTCGTGGTGTAGCGGTG  
AAATGCTTAGATATCACGAAGAAGTCCGATTGCGAAGGCAGCTCACTAGACTGCTCACTGACACTGATGCTCGAAAGTGTG  
GGTAT

>ASV:27:Species:putredinis

TACGGAGGATTCAAGCGTTATCCGGATTTATTGGGTTTAAAGGGTGCCTAGGCGGTTTGATAAGTTAGAGGTGAAATTTCC  
GGGCTCAACCGTAAAGTGCCTCTAATACTGTTGAGCTAGAGAGTAGTTGCGGTAGGCGGAATGTATGGTGTAGCGGTG  
AAATGCTTAGAGATCATACAGAACCACCGATTGCGAAGGCAGCTTACCAAATATATCTGACGTTGAGGCACGAAAGCGTG

GGGAG  
>ASV:28:Genus:Escherichia/Shigella  
TACGGAGGGTGC AAGCGTTAATCGGAATTACTGGGCGTAAAGGCGCACGCAGGCGGTTTGTAAAGTCAGATGTGAAATCCC  
CGGGCTCAACCTGGGAAGTGCATCTGATACTGGCAAGCTTGAGTCTCGTAGAGGGGGGTAGAATTCAGGTGTAGCGGTG  
AATGCGTAGAGATCTGGAGGAATACCGGTGGCGAAGGCGGCCCTGGACGAAGACTGACGCTCAGGTGCGAAAGCGTG  
GGGAG  
>ASV:29:Species:adolescentis/faecale/longum/stercoris  
TACGTAGGGTGC AAGCGTTAATCGGAATTACTGGGCGTAAAGGCGCTGTAGGCGGTTCTGTCGCGTCCGGTGTGAAAGTCC  
ATCGCTTAACCGTGGATCCGCGCCGGGTACGGGCGGGCTTGAGTGCAGTGGGGAGACTGGAATTCAGGTGTAAAGCGTG  
GAATGTGTAGATATCGGAAGAACACCAATGGCGAAGGCAGGTCTCTGGGCCGTCACTGACGCTGAGGAGCGAAAGCGTG  
GGGAG  
>ASV:30:Species:excrementihominis  
TACGTAGGGTGC AAGCGTTAATCGGAATTACTGGGCGTAAAGGCGCGCAGGCGGTTGAGTAAGACAGATGTGAAATCCC  
CGAGCTTAACCTCGGGAATGGCATATGTGACTGCTCGACTAGAGTGTGTGAGGGAGGTGGAATTCACGCTGTAGCAGTG  
AATGCGTAGATATGTGGAAGAACACCGATGGCGAAGGCAGCTCTGGGACATAACTGACGCTCAGGCACGAAAGCGTG  
GGGAG  
>ASV:31:Family:Lachnospiraceae  
TACGTAGGGGCA AAGCGTTAATCGGAATTACTGGGTGTAAGGGAGCGTAGACGGCATGGCAAGCCAGATGTGAAAGCCC  
GGGGCTCAACCCCGGACTGCATTTGAACTGTGAGGCTAGAGTGTGCGGAGAGGAAAGCGGAATTCCTAGTGTAGCGGTG  
AATGCGTAGATATTAGGAGGAACACCAAGTGGCGAAGGCGGCTTCTGGACGATGACTGACGTTGAGGCTCGAAAGCGTG  
GGGAG  
>ASV:32:Species:massiliensis  
TACGTAGGTGGC AAGCGTTGTCCGGAATTATTGGGCGTAAAGGGCGCGCAGGCGGCATCGCAAGTCGGTCTTAAAAGTGC  
GGGGCTTAACCCCGTGGAGGGACCGAACTGTGAAGCTCGAGTGTGCGGAGAGGAAAGCGGAATTCCTAGTGTAGCGGTGA  
AATGCGTAGATATTAGGAGGAACACCAAGTGGCGAAGGCGGCTTCTGGACGACAAGTACGCTGAGGCGCGAAAGCCAG  
GGAGC  
>ASV:33:Species:caccae  
TACGGAGGATCCG AAGCGTTATCCGGATTTATTGGGTTAAAGGGAGCGTAGGCGGATTGTTAAGTCAGTTGTGAAAGTTT  
GCGGCTCAACCGTAAAATTGCAGTTGATACTGGCAGTCTTGAGTGCAGTAGAGGTGGCGGAATTCGTGGTGTAGCGGTG  
AATGCTTAGATATCACGAAGAACTCCGATTGCGAAGGCAGCTCACTGGAGTGAAGTACGCTGATGCTCGAAAGTGTG  
GGTAT  
>ASV:34:Species:inulinivorans  
TACGTATGGTGC AAGCGTTATCCGGAATTACTGGGTGTAAGGGAGCGCAGGCGGAAGGCTAAGTCTGATGTGAAAGCCC  
GGGGCTCAACCCCGTACTGCATTGAAACTGGTCACTAGAGTGTGCGGAGGGGTAAGTGGAAATTCCTAGTGTAGCGGTG  
AATGCGTAGATATTAGGAGGAACACCAAGTGGCGAAGGCGGCTTACTGGACGATAACTGACGCTGAGGCTCGAAAGCGTG  
GGGAG  
>ASV:35:Genus:Ruminococcaceae\_UCG-002  
TACGTAGGTGGC AAGCGTTGTCCGATTTACTGGGTGTAAGGGCGGTGAGCCGGGAGGGCAAGTCAGATGTGAAATCCA  
CGGGCTCAACTCGTGAAGTGCATTTGAACTACTCTTCTTGAGTATCGGAGAGGCAATCGGAATTCCTAGTGTAGCGGTG  
AATGCGTAGATATTAGGAGGAACACCAAGTGGCGAAGGCGGATTGCTGGACGACAAGTACGCTGAGGCGCGAAAGCGTG  
GGGAG  
>ASV:36:Species:bromii  
TACGTAGGGAGC AAGCGTTGTCCGATTTACTGGGTGTAAGGGTGCAGTGGCGGCTTTCAGTCAAGTCAGATGTGAAATCTA  
TGGGCTCAACCCATAAACTGCATTTGAACTGTAGAGCTTGAGTGAAGTAGAGGCAGGCGGAATTCAGTGTAGCGGTG  
AATGCGTAGAGATGGGGAGGAACACCAAGTGGCGAAGGCGGCTGCTGGGCTTAACTGACGCTGAGGCACGAAAGCGTG  
GGTAG  
>ASV:37:Species:massiliensis  
TACGGAGGATCCG AAGCGTTATCCGATTTATTGGGTTAAAGGGAGCGTAGATGGGTTGTTAAGTCAGTTGTGAAAGTTT  
GCGGCTCAACCGTAAAATTGCAATTGATACTGGCAGTCTTGAGTACAGTTGAGGTAGGCGGAATTCGTGGTGTAGCGGTG  
AATGCTTAGATATCACGAAGAACTCCGATTGCGAAGGCAGCTTACTAACCTGTAAGTACGCTGATGCTCGAAAGTGTG  
GGTAT  
>ASV:38:Species:longicatena  
TACGTAGGGGCA AAGCGTTATCCGATTTACTGGGTGTAAGGGAGCGTAGACGGCACGGCAAGCCAGATGTGAAAGCCC  
GGGGCTCAACCCCGGACTGCATTTGAACTGCTGAGCTAGAGTGTGCGGAGAGGCAAGTGGAAATTCCTAGTGTAGCGGTG  
AATGCGTAGATATTAGGAGGAACACCAAGTGGCGAAGGCGGCTTCTGGACGATGACTGACGTTGAGGCTCGAAAGCGTG  
GGGAG  
>ASV:39:Species:bacterium  
TACGTAGGTGGC AAGCGTTGTCCGATTTACTGGGTGTAAGGGCGTGCAGCCGGTCTGCAAGTCAGATGTGAAATCCA  
TGGGCTCAACCCATGAAGTGCATTTGAACTGTAGATCTTGAGTGTGCGGAGGGGCAATCGGAATTCCTAGTGTAGCGGTG  
AATGCGTAGATATTAGGAGGAACACCAAGTGGCGAAGGCGGATTGCTGGACGATAACTGACGCTGAGGCGCGAAAGTGTG  
GGGAG  
>ASV:40:Genus:UBA1819  
AACGTAGGGTGC AAGCGTTGTCCGGAATTACTGGGTGTAAGGGAGCGCAGGCGGATTGGCAAGTTGGGAGTGAATCTA  
TGGGCTCAACCCATAAATTGCTTTCAAAGTGTGAGTCTTGAGTGGTGTAGAGGTAGGCGGAATTCAGGTGTAGCGGTG  
GAATGCGTAGATATCGGGAGGAACACCAAGTGGCGAAGGCGGCTTACTGGGCACTAACTGACGCTGAGGCTCGAAAGCATG  
GGTAG  
>ASV:41:Species:hadrus  
TACGTAGGGGCA AAGCGTTATCCGGAATTACTGGGTGTAAGGGTGCAGTGGTGTGGCAAGTCAGAAGTGAAGCC

AGGGCTTAACTCTGGGACTGCTTTTGAAACTGTCAGACTGGAGTGCAGGAGAGGTAAGCGGAATTCCTAGTGTAGCGGTG  
AAATGCGTAGATATTAGGAGGAACATCAGTGGCGAAGGCGGCTTACTGGACTGAAACTGACACTGAGGCACGAAAGCGTG  
GGGAG

>ASV:42:Species:mitsuokai

TACGTAGGTGGCGAGCGTTATCCGGAATCATTGGGCGTAAAGAGGGAGCAGGCGGCCGCAAGGGTCTGTGGTAAAAGACC  
GAAGCTAAACTTCGGTAAGCCATGAAACCGGGCGGCTAGAGTGCAGGAGAGGATCGTGGAATTCATGTGTAGCGGTGA  
AATGCGTAGATATATGGAGGAACACCACTGAGGCGAAGGCGACGGTCTGGGCGCAACTGACGCTCATTCCGAAAGCGTGG  
GGAGC

>ASV:43:Species:ovatus

TACGGAGGATCCGAGCGTTATCCGGATTTATTGGGTTTAAAGGGAGCGTAGGTGGATTGTTAAGTCAGTTGTGAAAAGTTT  
GCGGCTCAACCGTAAAATTGCAGTTGAAACTGGGAGTCTTGAGTACAGTAGAGGTGGGCGGAATTCGTGGTGTAGCGGTG  
AAATGCTTAGATATCACGAAGAACCAGTTGCGAAGGCAGCTACTAGACTGCTACTGACACTGATGCTCGAAAGTGTG  
GGTAT

>ASV:44:Species:fingoldii

TACGGAGGATCAAGCGTTATCCGGATTTATTGGGTTTAAAGGGTGCAGTAGGCGGTTTGATAAGTTAGAGGTGAAATACC  
GGGGCTCAACTCCGGAAGTGCCTTAATACTGTTGAACTAGAGAGTAGTTGCGGTAGGCGGAATGTATGGTGTAGCGGTG  
AAATGCTTAGAGATCATAAGAACACCCAGTTGCGAAGGCAGCTTACCAACTATATCTGACGTTGAGGCACGAAAGCGTG  
GGGAG

>ASV:45:Genus:Streptococcus

TACGTAGGTCCGAGCGTTGTCCGGATTTATTGGGCGTAAAGCGAGCGCAGGCGGTTTGATAAGTCTGAAGTTAAAGGCT  
GTGGCTCAACCATAGTTCGCTTTGAAACTGTCAAACCTTGAAGTGCAGGAGGGGAGAGTGGAATTCATGTGTAGCGGTGA  
AATGCGTAGATATATGGAGGAACACCCGGTGGCGAAGGCGGCTCTCTGGTCTGTAAGTACGCTGAGGCTCGAAAGCGTGG  
GGAGC

>ASV:46:Species:uniformis

TACGGAGGATCCGAGCGTTATCCGGATTTATTGGGTTTAAAGGGAGCGTAGGCGGACGCTTAAAGTCAAGTTGAAAAGTTT  
GCGGCTCAACCGTAAAATTGCAGTTGATACTGGGTGTCTTGAGTACAGTAGAGGCAGGCGGAATTCGTGGTGTAGCGGTG  
AAATGCTTAGATATCACGAAGAACCAGTTGCGAAGGCAGCTGCTGGACTGTAAGTACGCTGATGCTCGAAAGTGTG  
GGTAT

>ASV:47:Species:aerofaciens

TACGTAGGGGGCGAGCGTTATCCGGATTCATTGGGCGTAAAGCGCGCTAGGCGGCCCGGCAGGCGGGGGTGAAGCGG  
GGGGCTCAACCCCGAAGCCCGGAACCTCCGCGGCTTGGGTCCGGTAGGGGAGGGTGGAACACCCGGTGTAGCGGTG  
GAATGCGCAGATATCGGGTGAACACCCGGTGGCGAAGGCGGCCCTCTGGGCCGAGACGACGCTGAGGCGCGAAAGCTGG  
GGGAG

>ASV:48:Species:massiliensis

TACGTAGGGGGCAAGCGTTATCCGGATTTACTGGGTGTAAAGGGAGCGTAGACGGATGGACAAGTCTGATGTGAAAAGGCT  
GGGGCTCAACCCCGGACTGCATTGAAAAGTCCCGTCTTGAGTGCCGGAGAGGTAAGCGGAATTCCTAGTGTAGCGGTG  
AAATGCGTAGATATTAGGAGGAACACCACTGAGGCGAAGGCGGCTTACTGGACGGTAACTGACGTTGAGGCTCGAAAGCGTG  
GGGAG

>ASV:49:Genus:Erysipelotrichaceae\_UCG-003

TACGTAGGTGGCGAGCGTTATCCGGAATTTATTGGGCGTAAAGAGGGAGCAGGCGGCACTAAGGGTCTGTGGTAAAAGATC  
GAAGCTTAACTTCGGTAAGCCATGAAACCGTAGAGCTAGAGTGTGTGAGAGGATCGTGGAATTCATGTGTAGCGGTGA  
AATGCGTAGATATATGGAGGAACACCACTGAGGCGAAGGCGGCTTACTGGACGGTAACTGACGTTGAGGCTCGAAAGCGTG  
GGAGC

>ASV:50:Genus:Faecalibacterium

AACGTAGGTACAAGCGTTGTCCGGAATTTACTGGGTGTAAAGGGAGCGCAGGCGGGCGATCAAGTTGGAAGTAAAATCCA  
TGGGCTCAACCCATGAAGTGTCTTCAAACCTGGTGTCTTGAGTAGTGCAGAGGTAAGCGGGAATTCGCGGTGTAGCGGTG  
GAATGCGTAGATATCGGGAGGAACACCACTGAGGCGAAGGCGGCTTACTGGGCACCAACTGACGCTGAGGCTCGAAAGTGTG  
GGTAG

>ASV:51:Genus:Christensenellaceae\_R-7\_group

TACGTAGGGGGCAAGCGTTGTCCGGAATAATTGGGCGTAAAGGGCGCGTAGGCGGCTCGGTAAGTCTGGAGTAAAAGTCC  
TGCTTTAAGGTGGGAATGCTTTGGATACTGCGGCTTGAGTGCAGGAGAGGTTAGTGGAATTCAGTGTAGCGGTG  
AAATGCGTAGAGATTGGGAGGAACACCACTGAGGCGAAGGCGGCTTACTGGACGATTACTGACGCTGAGGCGCGAAAGTGTG  
GGGAG

>ASV:52:Species:intestinalis

TACGTATGGTGAAGCGTTATCCGGATTTACTGGGTGTAAAGGGAGCGCAGGCGGTACGGCAAGTCTGATGTGAAAAGCCC  
GGGGCTCAACCCGGTACTGCATTGAAAAGTGTCCGACTAGAGTGTCCGAGGGGTAAGTGGAATTCCTAGTGTAGCGGTG  
AAATGCGTAGATATTAGGAGGAACACCACTGAGGCGAAGGCGGCTTACTGGACGATTACTGACGCTGAGGCTCGAAAGCGTG  
GGGAG

>ASV:53:Species:intestini

TACGTAGGTGGCAAGCGTTGTCCGGAATTTATTGGGCGTAAAGAGCATGTAGGCGGGCTTTTAAAGTCTGACGTGAAAATGC  
GGGGCTTAAACCCGATGGCGTTGGATACTGGAAGTCTTGAGTGCAGGAGAGGAAAGGGGAATTCAGTGTAGCGGTGA  
AATGCGTAGATATTGGGAGGAACACCACTGAGGCGAAGGCGGCTTTCTGGACTGTGTCTGACGCTGAGATGCGAAAGCCAGG  
GTAGC

>ASV:54:Genus:Oscillibacter

TACGTAGGTGGCAAGCGTTGTCCGATTTACTGGGTGTAAAGGGCGTGCAGCCGGGCCGCAAGTCAAGTGTGAAAATCTG  
GAGGCTTAACTCCAACTGCATTTGAAACTGTAGGCTTGAGTACCAGGAGAGGTTATCGGAATTCCTTGTGTAGCGGTG  
AAATGCGTAGATATAAGGAAGAACACCACTGAGGCGAAGGCGGATAACTGGACGGCAACTGACGTTGAGGCGCGAAAGCGTG  
GGGAG

>ASV:55:Genus:Ruminococcaceae\_NK4A214\_group  
TACGTAGGTGGCGAGCGTTATCCGGATTTACTGGGTGTAAAGGGCGCGTAGGCGGGAATGCAAGTCAGATGTGAAATCCA  
AGGGCTCAACCTTGAAGTGCATTTGAAACTGTATTTCTTGAGTGTGCGAGAGGTTGACGGAATTCCTAGTGTAGCGGTG  
AAATGCGTAGATATTAGGAGGAACACCAAGTGGCGAAGGCGGTCAACTGGACGATAACTGACGCTGAGGCGCAAAGCGTG  
GGGAG

>ASV:56:Species:influenzae/parainfluenzae  
TACGGAGGGTGGCGAGCGTTAATCGGAATAACTGGGCGTAAAGGGCACGCAGGCGGTGACTTAAGTGAGGTGTGAAAGCCC  
CGGGCTTAACCTGGGAATTGCATTTGAAACTGGTCTGCTAGAGTACTTTAGGGAGGGGTAGAATTCACGTGTAGCGGTG  
AAATGCGTAGAGATGTGGAGGAATACCGAAGGCGAAGGCGAGCCCTTGGGAATGTAAGTGTGACGCTCATGTGCGAAAGCGTG  
GGGAG

>ASV:57:Genus:Ruminococcaceae\_UCG-002  
TACGTAGGTGGCAAGCGTTGTCCGGATTTACTGGGTGTAAAGGGCGGTAGCCGGGAAGGCAAGTCAGATGTGAAATCCA  
CGGGCTCAACTCGTGAAGTGCATTTGAAACTGTTTCTTGAGTATCGGAGAGGCAATCGGAATTCCTAGTGTAGCGGTG  
AAATGCGTAGATATTAGGAGGAACACCAAGTGGCGAAGGCGGATTGCTGGACGACAAGTACGCTGAGGCGCAAAGCGTG  
GGGAG

>ASV:58:Species:ilealis/timonensis  
TACGTAGGGGCTAGCGTTATCCGGAAATTAAGTGGGCGTAAAGGGTGCAGGTAGGTGGTTTCTTAAGTCAGAGGTGAAAGGCT  
ACGGCTCAACCGTAGTAAGCCTTTGAAACTGGGAAACTTGTAGTGCAGGAGAGGAGTGAATTCCTAGTGTAGCGGTG  
AATGCGTAGATATTAGGAGGAACACCAAGTGGCGAAGGCGGCTCTCTGGACTGTAAGTACACTGAGGCGCAAAGCGTG  
GGAGC

>ASV:59:Species:saccharivorans  
TACGTAGGGGCAAGCGTTATCCGGATTTACTGGGTGTAAAGGGAGCGTAGACGGCAAGGCAAGTCTGATGTGAAAACCC  
AGGGCTTAACCTGGGACTGCATTTGAAACTGTCTGCTCGAGTGCAGGAGAGGTAAGCGGAATTCCTAGTGTAGCGGTG  
AAATGCGTAGATATTAGGAGGAACACCAAGTGGCGAAGGCGGCTTACTGGACGTAAGTACGCTTGGGCTCGAAAGCGTG  
GGGAG

>ASV:60:Genus:Lachnospiraceae\_NK4A136\_group  
TACGTAGGGGCAAGCGTTATCCGGATTTACTGGGTGTAAAGGGAGCGTAGACGGTTTTGCAAGTCTGAAGTGAAGGCC  
GGGGCTTAACCCGGGACTGCTTTGAAACTGTAGAAGTGCAGGAGAGGTAAGTGAATTCCTAGTGTAGCGGTG  
AAATGCGTAGATATTAGGAGGAACACCAAGTGGCGAAGGCGGCTTACTGGACTGTAAGTACGCTTGGGCTCGAAAGCGTG  
GGGAG

>ASV:61:Species:pectinoschiza  
TACGTATGGAGCAAGCGTTATCCGGATTTACTGGGTGTAAAGGGAGTGTAGGTGGCCAGGCAAGTCAGAAGTGAAGGCC  
GGGGCTCAACCCGGGACTGCTTTGAAACTGCAGGGCTAGAGTGCAGGAGGGGCAAGTGAATTCCTAGTGTAGCGGTG  
AAATGCGTAGATATTAGGAGGAACACCAAGTGGCGAAGGCGGCTTCTGGACTGTAAGTACACTGAGGCTCGAAAGCGTG  
GGGAG

>ASV:62:Species:eggerthii  
TACGGAGGATCCGAGCGTTATCCGGATTTATTGGGTTTAAAGGGAGCGTAGGCGGGTCTTAAGTCAGTTGTGAAAGTTT  
GCGGCTCAACCGTAAAATTGCAAGTTGATACTGGGCGCCTTGGTGCAGCATAGGTAGGCGGAATTCGTGGTGTAGCGGTG  
AAATGCTTAGATATCACGAAGAACTCCGATTGCGAAGGCAGCTTACTGGACTGTAAGTACGCTGATGCTCGAAAGTGTG  
GGTAT

>ASV:63:Genus:Agathobacter  
TACGTATGGTGCAGCGTTATCCGGATTTACTGGGTGTAAAGGGAGCGCAGGCGGTGCGGCAAGTCTGATGTGAAAGGCC  
GGGGCTCAACCCGGTACTGCATTGAAACTGCTGACTAGAGTGTGCGGAGGGTAAGTGAATTCCTAGTGTAGCGGTG  
AAATGCGTAGATATTAGGAGGAACACCAAGTGGCGAAGGCGGCTTACTGGACGATAACTGACGCTGAGGCTCGAAAGCGTG  
GGGAG

>ASV:64:Species:comes  
TACGTATGGTGCAGCGTTATCCGGATTTACTGGGTGTAAAGGGAGCGTAGACGGCTGTGTAAGTCTGAAGTGAAGGCC  
GGGGCTCAACCCGGGACTGCTTTGAAACTATGCAGCTAGAGTGTGCGGAGAGGTAAGTGAATTCAGTGTAGCGGTG  
AAATGCGTAGATATTGGGAGGAACACCAAGTGGCGAAGGCGGCTTACTGGACGATGACTGACGCTGAGGCTCGAAAGCGTG  
GGGAG

>ASV:65:Species:cellulosilyticus/intestinalis/timonensis  
TACGGAGGATCCGAGCGTTATCCGGATTTATTGGGTTTAAAGGGAGCGTAGGCGGACTATTAAGTCAGCTGTGAAAGTTT  
GCGGCTCAACCGTAAAATTGCAAGTTGATACTGGTCTGCTTGGTGCAGTAGAGGTAGGCGGAATTCGTGGTGTAGCGGTG  
AAATGCTTAGATATCACGAAGAACTCCGATTGCGAAGGCAGCTTACTGGACTGTAAGTACGCTGATGCTCGAAAGTGTG  
GGTAT

>ASV:66:Genus:Prevotella\_9  
TACGGAAGGTCCGGGCGTTATCCGGATTTATTGGGTTTAAAGGGAGCGTAGGCGGAGATTAAGCGTGTGTAAGTGA  
GATGCTCAACATCTGCACTGCAGCGCAACTGGTTTCTTGGTACGCACAAAGTGGGCGGAATTCGTGGTGTAGCGGTG  
AAATGCTTAGATATCACGAAGAACTCCGATTGCGAAGGCAGCTCACTGGAGCGCAACTGACGCTGAAGCTCGAAAGTGG  
GGTAT

>ASV:67:Species:muciniphila  
TACAGAGGTCTCAAGCGTTGTTCCGAATCACTGGGCGTAAAGCGTGCAGTGGCGGTTTCTGAAGTCTGTGTGAAAGGCC  
GGGGCTCAACCCCGGACTGCACATGATACTGCGAGACTAGAGTAATGGAGGGGAACCGGAATTCGTGGTGTAGCAGTG  
AAATGCGTAGATATCGAGAGGAACACTCGTGGCGAAGGCGGTTCTGGACATTAAGTACGCTGAGGCGCAAAGGCCAG  
GGGAG

>ASV:68:Family:Ruminococcaceae  
TACGTAGGTGGCAAGCGTTATCCGGAAATTAAGTGGGCGTAAAGGGAGCGCAGGCGGGATAGCAAGTCAGCTGTGAAACTA  
TGGGCTCAACCCATAAAGTGCAGTTGAAACTGTTATCTTGGTGGAGTAGAGGCAAGCGGAATTCAGTGTAGCGGTG

AAATGCGTAGATATTCGGAGGAACACCAGTGGCGAAGGCGGCTTGCTGGGCTCTAACTGACGCTGAGGCTCGAAAGGTG  
GGGAG  
>ASV:69:Species:shahii  
TACGGAGGATCCAAGCGTTATCCGGATTTATTGGGTTAAAGGGTGCCTAGGCGGTTTGATAAGTTAGAGGTGAAATACC  
GGTGCTTAACACCGAACTGCCTCTAATACTGTTGAACTAGAGAGTAGTTGCGGTAGGCGGAATGTATGGTGTAGCGGTG  
AAATGCGTAGATATACAGAACACCAGTGGCGAAGGCAGCTTACCAAATATATCTGACGTTGAGGCACGAAAGCGTG  
GGGAG  
>ASV:70:Species:plautii  
TACGTAGGTGGCAAGCGTTATCCGGATTTACTGGGTGTAAGGGGCGTGTAGGCGGGATTGCAAGTCAGATGTGAAAAGT  
GGGGCTCAACCTCCAGCTGCATTTGAAACTGTAGTCTTGAGTGTGGAGAGGCAATCGGAATTCGTGTGTAGCGGTG  
AAATGCGTAGATATACGGAGGAACACCAGTGGCGAAGGCGGATTGCTGGACAGTAAGTACGCTGAGGCAGCAAGCGTG  
GGGAG  
>ASV:71:Species:faecis  
TACGTAGGGGGCAAGCGTTATCCGGATTTACTGGGTGTAAGGGGAGCGTAGACGGCGCAGCAAGTCTGATGTGAAAGGCA  
GGGGCTTAACCCCTGGACTGCATTGAAACTGCTGTGCTTGAGTGCAGGAGGGTAAGCGGAATTCCTAGTGTAGCGGTG  
AAATGCGTAGATATTAGGAGGAACACCAGTGGCGAAGGCGGCTTACTGGACGTAAGTACGCTGAGGCAGCAAGCGTG  
GGGAG  
>ASV:72:Genus:Ruminococcaceae\_UCG-002  
TACGTAGGTGGCAAGCGTTGTCCGGATTTACTGGGTGTAAGGGGCGTGCAGCCGGGAATGCAAGTCAGATGTGAAATCCA  
TGGGCTTAACCCATGAACTGCATTTGAAACTGTATTTCTTGAGTACTGGAGAGGCAATCGGAATTCCTAGTGTAGCGGTG  
AAATGCGTAGATATTAGGAGGAACACCAGTGGCGAAGGCGGATTGCTGGACAGCAAGTACGCTGAGGCAGCAAGCGTG  
GGGAG  
>ASV:73:Species:faecium  
TACGTAGGTGGCGAGCGTTGTCCGGAATTATTGGGCGTAAAGAGCATGTAGGCGGCTTAATAAGTCGAGCGTGAAAATGC  
GGGGCTCAACCCCGTATGGCGCTGAAACTGTAGGCTTGAGTGCAGGAGAGGAAAGGGGAATTCCTAGTGTAGCGGTG  
AATGCGTAGATATTGGGAGGAACACCAGTGGCGAAGGCGCCTTTCTGGACTGTGTCTGACGCTGAGATGCGAAAGCCAG  
GTAGC  
>ASV:74:Species:argenteus/aureus/capitis/caprae/devriesei/epidermidis/equorum/haemolyticus/  
hominis/lugdunensis/pasteuri/petrasii/phage/saccharolyticus/schweitzeri/simiae/warneri  
TACGTAGGTGGCAAGCGTTATCCGGAATTATTGGGCGTAAAGCGCGCTAGGCGGTTTTTAAGTCTGATGTGAAAGCCC  
ACGGCTCAACCCGTGGAGGGTATTGAAACTGGAAGACTTGTAGTGCAGAAAGAGGAAAGTGAATTCATGTGTAGCGGTG  
AAATGCGCAGAGATATGGAGGAACACCAGTGGCGAAGGCGACTTTCTGGTCTGTAAGTACGCTGATGTGCGAAAGCGTG  
GGGAT  
>ASV:75:Species:funiformis  
TACGTAGGCGGCAAGCGTTGTCCGGAATTATTGGGCGTAAAGGGAGCGCAGGCGGGAATAAGCGGATCTTAAAAGTGC  
GGGGCTCAACCCCGTATGGGCTCGAAACTGGTTTTCTTGAGTGCAGGAGAGGAAAGCGGAATTCCTAGTGTAGCGGTG  
AATGCGTAGATATTGGGAAGAACACCAGTGGCGAAGGCGGCTTTCTGGACTGTAAGTACGCTGAGGCTCGAAAGCTAGG  
GTAGC  
>ASV:76:Species:bartlettii  
TACGTAGGGGCTAGCGTTATCCGGATTTACTGGGCGTAAAGGGTGCCTAGGCGGCTTTTTAAGTCAGGAGTGAAAGGCT  
ACGGCTCAACCCGTAGTAAGCTCTTGAAGTGGAGACTTGTAGTGCAGGAGAGGAGAGTGAATTCCTAGTGTAGCGGTG  
AATGCGTAGATATTAGGAGGAACACCAGTGGCGAAGGCGGCTCTCTGGACTGTAAGTACGCTGAGGCTCGAAAGCGTG  
GGAGC  
>ASV:77:Genus:Bacteroides  
TACGGAGGATTCGAGCGTTATCCGGATTTATTGGGTTAAAGGGAGCGTAGATGGATGTTTAAAGTCAGTTGTGAAAGTTT  
GCGGCTCAACCCGTAAATTCGAGTTGATACTGGATATCTTGAGTGCAGTTGAGGCAGGCGGAATTCGTGGTGTAGCGGTG  
AAATGCTTAGATATACGAAGAACTCCGATTGCGAAGGCAGCCTGCTAAGCTGCAACTGACATTGAGGCTCGAAAGTGTG  
GGTAT  
>ASV:78:Genus:Holdemanelia  
TACGTAGGTGGCGAGCGTTATCCGGAATGATTGGGCGTAAAGGGTGCCTAGGTGGCAGATCAAGTCTGGAGTAAAAGGTA  
TGGGCTCAACCCGACTGGCTCTGAAACTGATCAGCTAGAGAACAGAAGAGGACGGCGGAATTCATGTGTAGCGGTAA  
AATGCGTAGATATATGGAAGAACACCAGTGGCGAAGGCGGCGCTGCTGGTCTGGATTCTGACACTGAAGCACGAAAGCGTG  
GGGAG  
>ASV:79:Family:Lachnospiraceae  
TACGTATGGAGCAAGCGTTATCCGGATTTACTGGGTGTAAGGGTGCCTAGGTGGCAGTGCAGTCAAGTCAGATGTGAAAGGCC  
GGGGCTCAACCCCGAGCTGCATTTGAAACTGCTCGGCTAGAGTACAGGAGAGGCAGGCGGAATTCCTAGTGTAGCGGTG  
AAATGCGTAGATATTAGGAGGAACACCAGTGGCGAAGGCGGCTGCTGGACTGTTACTGACACTGAGGCACGAAAGCGTG  
GGGAG  
>ASV:80:Genus:Ruminococcaceae\_UCG-013  
TACGTAGGTGACAAGCGTTGTCCGGATTTACTGGGTGTAAGGGGCGGCTAGGCGGACTGTCAAGTCAGTGTGAAATACC  
GGGGCTTAACCCCGGGCTGCATTGAAACTGACAGCTTGAGTATCGGAGAGGAAAGCGGAATTCCTAGTGTAGCGGTG  
AAATGCGTAGATATTAGGAGGAACACCAGTGGCGAAGGCGGCTTTCTGGACGAACTGACGCTGAGGCAGCAAGCGTG  
GGGAG  
>ASV:81:Family:Lachnospiraceae  
TACGTATGGTGAAGCGTTATCCGGATTTACTGGGTGTAAGGGGAGCGTAGACGGAGTGGCAAGTCTGATGTGAAAACCC  
GGGGCTCAACCCCGGACTGCATTGAAACTGTCAATCTAGAGTACGGAGAGGTAAGCGGAATTCCTAGTGTAGCGGTG  
AAATGCGTAGATATTAGGAGGAACACCAGTGGCGAAGGCGGCTTACTGGACGTAAGTACGCTGAGGCTCGAAAGCGTG  
GGGAG

>ASV:82:Genus:Dialister  
TACGTAGGTGGCAAGCGTTGTCCGGAATTATTGGGCGTAAAGCGCGCAGGCGGCTTCTTAAGTCCATCTTAAAAGTGC  
GGGGCTTAACCCCGTATGGGATGAAACTGAGAGGCTGGAGTATCGGAGAGGAAAGTGAATTCTTAGTGTAGCGGTGA  
AATGCGTAGAGATTAGGAAGAACACCCGGTGGCGAAGGCGACTTTCTGGACGACAACTGACGCTGAGGCGCAAAGCGTGG  
GGAGC

>ASV:83:Species:hadrus  
TACGTAGGGGGCAAGCGTTATCCGGAATTACTGGGTGTAAGGGTGCCTAGGTGGTATGGCAAGTCAGAAGTGAAAACCC  
AGGGCTTAACCTCTGGGACTGCTTTGAACTGTCAGACTAGAGTGCAGGAGAGGTAAGCGGAATTCTTAGTGTAGCGGTG  
AAATGCGTAGATATTAGGAGGAACATCAGTGGCGAAGGCGGCTTACTGGACTGAAACTGACACTGAGGCACGAAAGCGTG  
GGGAG

>ASV:84:Genus:Dialister  
TACGTAGGTGGCAAGCGTTGTCCGGAATTATTGGGCGTAAAGCGCGCAGGCGGCTTCTTAAGTCCATCTTAAAAGTGC  
GGGGCTTAACCCCGTATGGGATGAAACTGGGAGGCTGGAGTATCGGAGAGGAAAGTGAATTCTTAGTGTAGCGGTGA  
AATGCGTAGAGATTAGGAAGAACACCCGGTGGCGAAGGCGACTTTCTGGACGACAACTGACGCTGAGGCGCAAAGCGTGG  
GGAGC

>ASV:85:Species:ramosum  
TACGTAGGTGGCAAGCGTTATCCGGAATTATTGGGCGTAAAGAGGGAGCAGGCGGCAGCAAGGGTCTGTGGTAAAAGCCT  
GAAGCTTAACCTCTGGGACTGCTTTGAACTGTCAGACTAGAGTGCAGGAGAGGATCGTGAATTCCATGTGTAGCGGTGA  
AATGCGTAGATATTAGGAGGAACACCCAGTGGCGAAGGCGACGATCTGGCCTGCAACTGACGCTCAGTCCGAAAGCGTGG  
GGAGC

>ASV:86:Species:wadsworthia  
TACGGAGGGTGAAGCGTTAATCGGAATCACTGGGCGTAAAGCGCACGTAAGGCGGCTTGGTAAGTCAGGGGTGAAATCCC  
ACAGCCCAACTGTGGAACTGCCTTTGATACTGCCAGGCTTGGTACCGGAGAGGGTGGCGGAATTCCAGGTGTAGGAGTG  
AAATCCGTAGATATCTGGAGGAACACCCGGTGGCGAAGGCGGCACCTGGACGGTAAGTACGCTGAGGTGCGAAAGCGTG  
GGTAG

>ASV:87:Genus:Paraprevotella  
TACGGAAGATGCGAGCGTTATCCGGATTTATTGGGTTAAAGGGAGCGTAGGCGGGCTTTTAAAGTCAGCGGTCAAATGTG  
GTGGCTCAACCTCTCAGCCTGCAAGCGTTGAACTGTAAGCCTTGGTCTGACAGGGCACATGGAATTCTGGTGTAGCGGTGA  
AATGCTTAGATATCACGAAGAAGTCCGATCGCGAAGGCAATTGTCCGGGGCATAACTGACGCTGAGGCTCGAAAGTGGCG  
GTATC

>ASV:88:Genus:Ruminiclostridium\_9  
TACGTAGGTGGCAAGCGTTATCCGGAATTTACTGGGTGTAAGGGGCGTGTAGGCGGGATCGCAAGTCAGATGTAAAAGTGC  
GAGGCTCAACCTCCAGCCTGCAATTTGAACTGTGGTTCTTGGTACTGGAGAGGCGAGACGGAATTCTTAGTGTAGCGGTG  
AAATGCGTAGATATTAGGAGGAACACCCAGTGGCGAAGGCGGCTCTGCTGGACAGCAACTGACGCTGAGGCGCAAAGCGTG  
GGGAG

>ASV:89:Species:formicigenerans  
TACGTAGGGGGCAAGCGTTATCCGGAATTTACTGGGTGTAAGGGAGCGTAGACGGCTGTGCAAGTCTGAAGTAAAAGGCA  
TGGGCTCAACCTGTGGACTGCTTTGAAACTGTGCAGCTAGAGTGTGCGAGAGGTAAGTGAATTCTTAGTGTAGCGGTG  
AAATGCGTAGATATTAGGAGGAACACCCAGTGGCGAAGGCGGCTTACTGGACGATGACTGACGTTGAGGCTCGAAAGCGTG  
GGGAG

>ASV:90:Species:prausnitzii  
AACGTAGGTCAACAGCGTTGTCCGGAATTTACTGGGTGTAAGGGAGCGCAGGCGGGGATCAAGTTGGAAGTAAAATCCA  
TGGGCTCAACCCATGAACTGCTTTCAAAGTATTGCTTGGTACTGAGTGTGAGAGGTAAGGCGGAATTCCCGGTGTAGCGGTG  
GAATGCGTAGATATCGGAGGAACACCCAGTGGCGAAGGCGGCTTACTGGGCACCAACTGACGCTGAGGCTCGAAAGTGTG  
GGTAG

>ASV:91:Genus:Lachnospira  
TACGTATGGAGCAAGCGTTATCCGGAATTTACTGGGTGTAAGGGAGTGTAGGTGGCCATGCAAGTCAGAAGTAAAATCC  
GGGGCTCAACCCGGAAGTGTCTTTGAAACTGTAAGGCTAGAGTGCAGGAGGGTGTAGTGAATTCTTAGTGTAGCGGTG  
AAATGCGTAGATATTAGGAGGAACACCCAGTGGCGAAGGCGGCTCACTGGACTGTAAGTACACTGAGGCTCGAAAGCGTG  
GGGAG

>ASV:92:Genus:Erysipelatoclostridium  
TACGTAGGTGGCGAGCGTTATCCGGAATTTATTGGGCGTAAAGAGGGAGCAGGCGGGCAGAGGCTGTGGTAAAAGACT  
GAAGCTTAACCTCAGTAAGCCATAGAAACCGGCTGCTAGAGTGCAGGAGAGGATCGTGAATTCCATGTGTAGCGGTGA  
AATGCGTAGATATTAGGAGGAACACCCAGTGGCGAAGGCGACGCTCTGGCCTGTAAGTACACTGAGGCTCATTCCGAAAGCGTG  
GGAGC

>ASV:93:Genus:Lachnoclostridium  
TACGTAGGGGGCAAGCGTTATCCGGAATTTACTGGGTGTAAGGGAGCGTAGACGGTAAAGCAAGTCTGAAGTAAAAGCCC  
GGGGCTCAACCCGGGACTGCTTTGAAACTGTTAACTAGAGTGTGGAGAGGTAAGCGGAATTCTTAGTGTAGCGGTG  
AAATGCGTAGATATTAGGAGGAACACCCAGTGGCGAAGGCGGCTTACTGGACAGTAACTGACGTTGAGGCTCGAAAGCGTG  
GGGAG

>ASV:94:Genus:Prevotella\_9  
TACGGAAGGTCCGGGCTTATCCGGAATTTATTGGGTTAAAGGGAGCGTAGGCGGAGATTAAGCGTGTGTGAAATGTA  
GATGCTCAACATCTGAACTGCAGCGCAACTGGTTTCTTGGTACGCACAAAGTGGGCGGAATTCTGGTGTAGCGGTG  
AAATGCTTAGATATCACGAAGAAGTCCGATTGCGAAGGCGAGTCACTGGAGCGCAACTGACGCTGAAGCTCGAAAGTGGC  
GGTAT

>ASV:95:Species:eutactus  
TACGTATGGTGAAGCGTTATCCGGAATTTACTGGGTGTAAGGGTGCCTAGGTGGCAAGGCAAGTCTGAAGTAAAATCC  
GGGGCTCAACCCGGAAGTGTCTTTGAAACTGTTTAGCTGGAGTACAGGAGAGGTAAGTGAATTCTTAGTGTAGCGGTG

AAATGCGTAGATATTAGGAGGAACACCAGTGGCGAAGGCGACTTACTGGACTGCTACTGACACTGAGGCACGAAAGCGTG  
GGGAG  
>ASV:96:Genus:Succinivibrio  
TACGGAGGGTGCAAGCGTTAATCGGAATAACTGGGCGTAAAGGGCATGCAGGCGTTTCAAGTAGGATGTGAAATCCC  
CGGGCTCAACCTGGGAACAGCATACTAAACTGGTGGACTAGAGTATTGCAGGGGAGACGGAATTCAGGTGTAGCGGTG  
GAATGCGTAGATATCTGGAAGAACACCAAAGGCGAAGGCGACTCTCTGGGCAAACTAGACGCTCATATGCGAAAGCGTG  
GGTAG  
>ASV:97:Species:obeum  
TACGTAGGGGGCAAGCGTTATCCGGATTTACTGGGTGTAAGGGAGCGTAGACGGACTGGCAAGTCTGATGTGAAAGCGG  
GGGGCTCAACCCCTGGACTGCATTGAAACTGTTAGTCTTGAGTGCCGGAGAGGTAAGCGGAATTCCTAGTGTAGCGGTG  
AAATGCGTAGATATTAGGAGGAACACCAGTGGCGAAGGCGGCTTACTGGACGTTAAGTACGCTTGAGGCTCGAAAGCGTG  
GGGAG  
>ASV:98:Genus:Ruminiclostridium\_5  
TACGTAGGGAGCGAGCGTTGTCCGGATTTACTGGGTGTAAGGGTGCCTAGGCGGGAGGCAAGTACGGCGTGAAATCTA  
TGGGCTTAACCCATAAACTGCGCTTGAAGTGTCTTGAGTGAAGTAGAGGTAGGCGGAATTCCTAGTGTAGCGGTG  
AAATGCGTAGAGATCGGGAGGAACACCAGTGGCGAAGGCGGCTTACTGGGCTTAACTGACGCTGAAGCACGAAAGCATG  
GGTAG  
>ASV:99:Genus:Lachnoclostridium  
TACGTAGGGGGCAAGCGTTATCCGGATTTACTGGGTGTAAGGGAGCGCAGACGGCACTGCAAGTCTGAAGTGAAGGCC  
GGGGCTCAACCCCGGACTGCTTTGAAACTGTAGAGCTAGAGTGTGGAGAGGCAAGCGGAATTCCTAGTGTAGCGGTG  
AAATGCGTAGATATTAGGAGGAACACCAGTGGCGAAGGCGGCTTCTGGACAGTAACTGACGTTGAGGCTCGAAAGCGTG  
GGGAG  
>ASV:100:Species:uniformis  
TACGGAGGATCCGAGCGTTATCCGGATTTATTGGGTTAAAGGGAGCGTAGGCGGATGCTTAAAGTCAAGTGTGAAAGTTT  
GCGGCTCAACCGTAAAATTGCAAGTGAATACTGGGTGTCTTGAGTACAGTAGAGGCGAGCGGAATTCCTAGTGTAGCGGTG  
AAATGCTTAGATATACGAAGAATCCGATTGCGAAGGCGAGCTTCTGGACTGTAAGTACGCTGATGCTCGAAAGTGTG  
GGTAT  
>ASV:101:Genus:Ruminiclostridium\_5  
TACGTAGGGAGCAAGCGTTGTCCGGATTTACTGGGTGTAAGGGTGCCTAGGCGGCTAGGCAAGTCAAGTCAAGTGA  
TGGGCTCAACCTGTGGACTGCTTTGAAACTGTTTAGCTTGAGTGAAGTAGAGGTAGGCGGAATTCCTAGTGTAGCGGTG  
AAATGCGTAGAGATCGGGAGGAACACCAGTGGCGAAGGCGGCTTACTGGGCTTAACTGACGCTGAGGCACGAAAGCATG  
GGTAG  
>ASV:102:Species:capnocytophagoides  
TACGGAGGATGCGAGCGTTATCCGGATTTATTGGGTTAAAGGGTGCCTAGGCGGGGATTTAAGTCAAGTGTGAAAGTTT  
GAGGCTCAACCTAAAATTGCGGTTGAAACTGGGTTTCTTGAGTGTATTTGAAGTAGGCGGAATTCCTAGTGTAGCGGTG  
AAATGCATAGATATAACGAAGAATCCAAATGCGCAGGCGAGCTTAACTACAAGTACGCTGAGGCACGAAAGCGTG  
GGTAT  
>ASV:103:Genus:Ruminococcaceae\_UCG-014  
TACGTAGGGAGCAAGCGTTATCCGGATTTATTGGGTGTAAGGGTGCCTAGACGGGAAAATAAGTATGTTGTGAAATCCC  
CATGCTTAACATGGGAACTGCAACTAAAAGTGTCTTCTTGAGTGTGGAGAGGAAAGTGAATTCCTAGTGTAGCGGTG  
AAATGCGTAGATATTAGGAGGAACACCAGTGGCGAAGGCGACTTCTGGACAGTAACTGACGTTGAGGCACGAAAGTGTG  
GGGAG  
>ASV:104:Family:Lachnospiraceae  
TACGTATGGTCAAGCGTTATCCGGATTTACTGGGTGTAAGGGTGCCTAGGTTGGTATGGCAAGTCAAGTGAAGGCT  
GGGGCTCAACCCCGGACTGCTTTTGAAGTGTCAAACTAGAGTACAGGAGAGGAAAGCGGAATTCCTAGTGTAGCGGTG  
AAATGCGTAGATATTAGGAGGAACACCAGTGGCGAAGGCGGCTTCTGGACTGAAACTGACACTGAGGCACGAAAGCGTG  
GGGAG  
>ASV:105:Genus:Lachnoclostridium  
TACGTAGGGGGCAAGCGTTATCCGGATTTACTGGGTGTAAGGGAGCGTAGACGGCGAAGCAAGTCTGAAGTGA  
AGGGCTCAACCCCTGGGACTGCTTTGAAACTGTTTGTAGAGTGTGGAGAGGTAAGTGAATTCCTAGTGTAGCGGTG  
AAATGCGTAGATATTAGGAGGAACACCAGTGGCGAAGGCGGCTTACTGGACGATAACTGACGTTGAGGCTCGAAAGCGTG  
GGGAG  
>ASV:106:Genus:Blautia  
TACGTAGGGGGCAAGCGTTATCCGGATTTACTGGGTGTAAGGGAGCGTAGACGGGCAAGTCTGATGTGAAAGCCC  
GGGGCTTAACCCCGGACTGCATTGAAACTGTCCATCTTGAGTGCCGGAGAGGTAAGCGGAATTCCTAGTGTAGCGGTG  
AAATGCGTAGATATTAGGAGGAACACCAGTGGCGAAGGCGGCTTACTGGACGTTAAGTACGCTTGAGGCTCGAAAGCGTG  
GGGAG  
>ASV:107:Genus:Lachnospira  
TACGTATGGAGCAAGCGTTATCCGGATTTACTGGGTGTAAGGGAGTGTAGGTGGCCATGCAAGTCAAGTGA  
GGGGCTCAACCCCGGAACTGCTTTTGAAGTGTAAAGGCTGGAGTGCAGGAGGGGTGAGTGAATTCCTAGTGTAGCGGTG  
AAATGCGTAGATATTAGGAGGAACACCAGTGGCGAAGGCGGCTCACTGGACTGTAAGTACGCTGAGGCTCGAAAGCGTG  
GGGAG  
>ASV:108:Genus:Ruminococcaceae\_UCG-005  
TACGTAGGTGGCAAGCGTTGTCCGGATTTACTGGGTGTAAGGGCGTGTAGGCGGAGAAGCAAGTCAAGTGA  
TGGGCTTAACCCATGAAGTGTCTTTGAAACTGTTTCCCTTGAGTATCGGAGAGGCGAGGCGGAATTCCTAGTGTAGCGGTG  
AAATGCGTAGATATTAGGAGGAACACCAGTGGCGAAGGCGGCTGCTGGACGACAAGTACGCTGAGGCGGCAAGGCGTG  
GGGAG  
>ASV:109:Species:bifidum



TACGTAGGGCGCAAGCGTTATCCGGATTTATTGGGCGTAAAGGGCTCGTAGGCGGCTCGTCGCGTCCGGTGTGAAAAGTCC  
ATCGCTTAACGGTGGATCTGCGCCGGGTACGGGCGGGCTGGAGTGCGGTAGGGGAGACTGGAATTCCTGGTGTAAACGGTG  
GAATGTGTAGATATCGGGAAGAACCACCGATGGCGAAGGCAGGTCTCTGGGCCGTCACTGACGCTGAGGAGCGAAAGCGTG  
GGGAG

>ASV:110:Family:Lachnospiraceae

TACGTATGGGGCAAGCGTTATCCGGATTTACTGGGTGTAAGGGAGCGTAGGCGGCATGGCAAGTCAGAAGTAAAAGCCT  
GGGGCTCAACCCCGAATTGCTTTTAAAAGTGTGAGGCTAGAGTGTGCGGAGGGTAAGCGGAATTCCTAGTGTAGCGGTG  
AAATGCGTAGATATTAGGAGGAACACCGGTGGCGAAGGCGGCTTACTGGACGATTACTGACGCTGAGGCTCGAAAGCGTG  
GGGAG

>ASV:111:Species:coprocola

TACGGAGGATGCGAGCGTTATCCGGATTTATTGGGTTTAAAGGGAGCGCAGACGGGAGATTAAGTCAGTTGTAAAAGTTT  
GCGGCTCAACCGTAAAATTGCAAGTTGATACTGGTTTCTTGGAGTGCAGTTGAGGCAGGCGGAATTCGTGGTGTAGCGGTG  
AAATGCTTAGATATCACGAAGAACCCTGATTGCGAAGGCAGCTTGTCTAACTGTAACGACGTTTCATGCTCGAAAGTGTG  
GGTAT

>ASV:112:Order: Mollicutes\_RF39

TACGTAGGTGGCGAGCGTTATCCGGATTTATTGGGCGTAAAGGGTGGTAGGCGGTATGTTAAGTATAAAAATAAAAGCCC  
GAAGCTTAACCTCGTTCTTTTATAAACTGGCAAAC TAGAGTACAGTAGAGGCAAATGGAATTCCTAGTGTAGTGGTAA  
AATGCGTAGATATTAGGAGGAACACCAAGTGGCGAAGGCGGATTGCTGGGCTGTAACGACGCTGAGGCACGAAAGCGTGG  
GGAGC

>ASV:113:Genus:Ruminiclostridium\_6

TACGTAGGTGGCAAGCGTTGTCCGGAATTACTGGGTGTAAGGGAGGTAGGCGGGATCAAGTCAGAAGTAAAATTA  
CGGGCTCAACTCGTAACCTGCTTTTAAAAGTACATTCTTGGAGTGAAGTAGAGGCAAGCGGAATTCCTAGTGTAGCGGTG  
AAATGCGTAGATATTAGGAGGAACACCAAGTGGCGAAGGCGGCTTGTCTGGGCTTTACTGACGCTGAGGCTCGAAAGCGTG  
GGGAG

>ASV:114:Genus:Ruminococcaceae\_UCG-003

TACGTAGGTGGCAAGCGTTGTCCGGAATTACTGGGTGTAAGGGCGTGCAGCCGGGCATGCAAGTCAGATGTGAAATCTC  
AGGGCTTAACCTGAAACTGCATTTGAAACTGTATGTCTTGGAGTCCCGGAGAGGTAATCGGAATTCCTGTGTAGCGGTG  
AAATGCGTAGATATAAGGAAGAACCACCAAGTGGCGAAGGCGGATTACTGGACGTAACGACGCTGAGGCACGAAAGCGTG  
GGGAG

>ASV:115:Family:Muribaculaceae

TACGGAGGATGCGAGCGTTATCCGGATTTATTGGGTTTAAAGGGAGCGCAGGCTGCGAGGCAAGTCAGCGGTCAAATGT  
GGGGCTCAACCCCGGCTGCGGTTGAAACTGTCTGCTAGAGTTCGAGTGAGGTATGCGGAATGCGTTGTGTAGCGGTG  
AAATGCATAGATATGACGCAGAACTCCGATTGCGAAGGCAGCATACCAACTCGCGACTGACGCTGAGGCTCGAAAGCGTG  
GTATC

>ASV:116:Genus:Roseburia

TACGTAGGGGGCAAGCGTTATCCGGATTTACTGGGTGTAAGGGAGCGCAGGCGGTGCGGCAAGTCTGATGTGAAAGCCC  
GGGGCTCAACCCCGGACTGCATTGGAAACTGTCTGACTTGGAGTATCGGAGAGGTAAGTGGAAATTCCTAGTGTAGCGGTG  
AAATGCGTAGATATTAGGAGGAACACCAAGTGGCGAAGGCGGCTTACTGGACTGTAACGACGCTGAGGCTCGAAAGCGTG  
GGGAG

>ASV:117:Species:intestinalis

TACGGAGGATCCGAGCGTTATCCGGATTTATTGGGTTTAAAGGGAGCGTAGGCGGATTATTAAGTCAGTTGTGAAAGTTT  
GCGGCTCAACCGTAAAATTGCAAGTTGATACTGGTAGTCTTGGAGTGCAGCAGAGGTAGGCGGAATTCGTGGTGTAGCGGTG  
AAATGCTTAGATATCACGAAGAACCCTGATTGCGAAGGCAGCTTACTGGACTGTAACGACGCTGATGCTCGAAAGTGTG  
GGTAT

>ASV:118:Species:stercoris

TACGGAGGATTCGAGCGTTATCCGGATTTATTGGGTTTAAAGGGAGCGTAGGCGGTTGTTAAGTCAGTTGTGAAAGTTT  
GCGGCTCAACCCCGGACTGCATTGGAAACTGTCTGACTTGGAGTGCAGCAGAGGTAGGCGGAATTCGTGGTGTAGCGGTG  
AAATGCTTAGATATCACGAAGAACCCTGATTGCGAAGGCAGCTTACTGGATTGTAACGACGCTGATGCTCGAAAGTGTG  
GGTAT

>ASV:119:Species:atypica/dispar

TACGTAGGTGGCAAGCGTTGTCCGGAATTATTGGGCGTAAAGCGCGCAGGCGGATTGGTCAGTCTGTCTTAAAAGTTT  
GGGGCTTAACCCCGTATGGGATGGAAACTGCCAATCTAGAGTATCGGAGAGGAAAGTGGAAATTCCTAGTGTAGCGGTG  
AAATGCGTAGATATTAGGAAGAACCACCAAGTGGCGAAGGCGACTTCTGACGAAACTGACGCTGAGGCGGAAAGCCAGG  
GGAGC

>ASV:120:Species:nexilis

TACGTATGGTGAAGCGTTATCCGGATTTACTGGGTGTAAGGGAGCGTAGACGTTGTGTAAGTCTGATGTGAAAGCCC  
GGGGCTCAACCCCGGACTGCATTGGAAACTATGTAAC TAGAGTGTGCGGAGAGGTAAGCGGAATTCCTAGTGTAGCGGTG  
AAATGCGTAGATATTAGGAGGAACACCAAGTGGCGAAGGCGGCTTACTGGACGATCACTGACGTTGAGGCTCGAAAGCGTG  
GGGAG

>ASV:121:Species:garvieae/lactis/taiwanensis

TACGTAGGTCCGAGCGTTGTCCGGATTTATTGGGCGTAAAGCGAGCGCAGGTGGTTTATTAAGTCTGGTGTAAAAGGCA  
GTGGCTCAACCATTTGATGCATTGGAAACTGGTAGACTTGGAGTGCAGGAGAGGAGAGTGGAAATTCATGTGTAGCGGTG  
AAATGCGTAGATATTAGGAGGAACACCGGTGGCGAAGGCGGCTCTCTGGCCTGTAACGACACTGAGGCTCGAAAGCGTG  
GGAGC

>ASV:122:Species:celatum/disporicum/saudiense

TACGTAGGTGGCGAGCGTTGTCCGGATTTACTGGGCGTAAAGGGAGCGTAGGCGGACTTTTAAAGTGAAGTGTGAAATACC  
CGGGCTCAACCTGGGTGCTGCATTTCAAAGTCTAGAGTGCAGGAGAGGAGAATGGAATTCCTAGTGTAGCGGTG  
AAATGCGTAGAGATTAGGAAGAACCACCAAGTGGCGAAGGCGGATTCTCTGGACTGTAACGACGCTGAGGCTCGAAAGCGTG

GGGAG

>ASV:123:Genus:Prevotella\_7

TACGGAAGGTCCGGCGTTATCCGGATTTATTGGGTTTAAAGGGAGCGCAGGCCGCCGGCAAGCGTGTGTGAAATGCA  
GTCGCTCAACGCTGCACTGCAGCGCAACTGCCAGCTTGAAGTGCAGCAACGTTGGCGGAATTCGCCGTGTAGCGGTG  
AAATGCTTAGATATGGCGAAGAACCAGTTCGCAAGGCAGCTGACGGGTGCGTAACTGACGCTCATGCTCGAAAGTGCG  
GGTAT

>ASV:124:Genus:Blautia

TACGTAGGGGGCAAGCGTTATCCGGATTTACTGGGTGTAAGGGAGCGTAGACGGAGCAGCAAGTCTGATGTGAAAACCC  
GGGGCTCAACCCCGGACTGCATTGGAACTGTTGATCTGGAGTGCAGGAGAGGTAAGCGGAATTCCTAGTGTAGCGGTG  
AAATGCGTAGATATTAGGAGGAACACCAGTGGCGAAGGCGGCTTACTGGACGGTAACTGACGTTGAGGCTCGAAAGCGTG  
GGGAG

>ASV:125:Genus:Subdoligranulum

AACGTAGGGTGCAAGCGTTGTCCGGAATTACTGGGTGTAAGGGAGCGCAGGCGGACCAGGCAAGTTGGAAGTAAATCCA  
TGGGCTCAACCCCGTGAATTGCTTTCAAACCTGCTGGCCTTGAAGTGTGACAGGAGGTAAGTGGAAATTCGCCGTGTAGCGGTG  
GAATGCGTAGATATCGGAGGAACACCAGTGGCGAAGGCGACTACTGGCACCAACTGACGCTGAGGCTCGAAAGCATG  
GGTAG

>ASV:126:Species:hominis

TACGTATGGTGAAGCGTTATCCGGATTTACTGGGTGTAAGGGAGCGCAGGCGGTACGGCAAGTCTGATGTGAAATCCC  
GGGGCTCAACCCCGTACTGCATTGGAACTGTCGGACTAGAGTGTGCGAGGGGTAAGTGGAAATTCCTAGTGTAGCGGTG  
AAATGCGTAGATATTAGGAGGAACACCAGTGGCGAAGGCGGCTTACTGGACGATTACTGACGCTGAGGCTCGAAAGCGTG  
GGGAG

>ASV:127:Family:Lachnospiraceae

TACGTAGGGGGCAAGCGTTATCCGGATTTACTGGGTGTAAGGGTGCCTAGGTGGCAAGGCAAGTCAAGTGTGAAAGGCC  
GGGGCTCAACCCCGTACTGCATTTGAACTGTCTAGCTAGAGTGCAGGAGAGGTAAGCGGAATTCCTAGTGTAGCGGTG  
AAATGCGTAGATATTAGGAGGAACACCAGTGGCGAAGGCGGCTTACTGGACTGTAACGACACTGAGGCACGAAAGCGTG  
GGGAG

>ASV:128:Genus:Tyzzerella

TACGTAGGGGGCAAGCGTTATCCGGAATTACTGGGTGTAAGGGAGCGTAGGCGCATGGTAAGCCAGATGTGAAAGCCT  
TGGGCTTAACCCGAGGATTGCATTTGAACTATCAAGCTAGAGTACAGGAGAGGAAAGCGGAATTCCTAGTGTAGCGGTG  
AAATGCGTAGATATTAGGAAGAACACCAGTGGCGAAGGCGGCTTCTGGACTGAAACTGACGCTGAGGCTCGAAAGCGTG  
GGGAG

>ASV:129:Species:dispar/parvula

TACGTAGGTGGCAAGCGTTGTCCGGAATTATTGGGCTAAAGCGCGCAGGCGGATAGGTCAGTCTGTCTTAAAGTTCC  
GGGGCTTAACCCCGTATGGGATGGAACTGCCAATCTAGAGTATCGGAGAGGAAAGTGGAAATTCCTAGTGTAGCGGTGA  
AATGCGTAGATATTAGGAAGAACACCAGTGGCGAAGGCGACTTCTGGACGAAAACCTGACGCTGAGGCGCGAAAGCCAGG  
GGAGC

>ASV:130:Species:normanense/ruptense

TACGAGGGTGCAAGCGTTATCCGGATTTATTGGGTTTAAAGGGTCCGTAGGCGGACTTATAAGTCAAGTGGTGAAGCCT  
GTCGCTTAACGATAGAAGTCCATTGATACTGTAAGTCTTGAAGTATTTGAGGTAGCTGGAATAAGTGTAGCGGTG  
AAATGCGTAGATATTACTTAGAACCAATTCGCAAGGCAGGTTACCAAGATATAACTGACGCTGAGGGACGAAAGCGTG  
GGGAG

>ASV:131:Species:maltophilia/rhizophila

TACGAAGGGTGCAAGCGTTACTCGGAATTACTGGGCGTAAAGCGTGCCTAGGTGGTTGTTAAGTCTGTTGTGAAAGCCC  
TGGGCTCAACCTGGGAATTGCAGTGGATACTGGGCGACTAGAGTGTGGTAGAGGTTAGTGGAAATTCGCCGTGTAGCAGTG  
AAATGCGTAGAGATCGGAGGAACATCCATGGCGAAGGCAGCTACCTGGACCAACACTGACACTGAGGCACGAAAGCGTG  
GGGAG

>ASV:132:Species:plebeius

TACGAGGATGCGAGCGTTATCCGGATTTATTGGGTTTAAAGGGAGCGCAGCGGTCGTTAAGTCAAGTGTGAAAGTTT  
GGGGCTCAACCTTAAATTTGAGTTGATACTGGCGTCTTGAAGTGTGCGGAAATTCGTTGGTGTAGCGGTG  
AAATGCTTAGATATACGAAGAACCAGTTCGCAAGGCAGCACACTAATCCGTAACCTGACGTTTATGCTCGAAAGTGTG  
GGTAT

>ASV:133:Species:obesi

TACGAGGATCAAGCGTTATCCGGATTTATTGGGTTTAAAGGGTGCCTAGGCGGTTTAGTAAGTCAAGCGGTGAAATTTT  
GGTGCTTAACACCAACGTCGCTGATACTGCTGGCTAGAGAGTAGTTGCGGTAGCGGAAATGTATGGTGTAGCGGTG  
AAATGCTTAGAGATACAGAAACACCAGTTCGCAAGGCAGCTTACCAAACTATATCTGACGTTGAGGCACGAAAGCGTG  
GGGAG

>ASV:134:Family:Lachnospiraceae

TACGTATGGAGCAAGCGTTATCCGGATTTACTGGGTGTAAGGGTGCCTAGGTGGCAGTCAAGTCAAGTGTGAAAGGCC  
GGGGCTCAACCCCGGAGCTGCATTTGAACTGCATAGCTAGAGTACAGGAGAGGCGAGCGGAAATTCCTAGTGTAGCGGTG  
AAATGCGTAGATATTAGGAGGAACACCAGTGGCGAAGGCGGCTGCTGGACTGTTACTGACACTGAGGCACGAAAGCGTG  
GGGAG

>ASV:135:Genus:Ruminiclostridium\_5

TACGTAGGGAGCAAGCGTTGTCCGGAATTACTGGGTGTAAGGGTGCCTAGGCGGATTGGCAAGTCAAGTGTGAAATCCA  
TGGGCTTAACCCATGAAGTGTCTTTGAACTGTTAGTCTTGAAGTGAAGTGAAGGTAGGCGGAAATTCGCCGTGTAGCGGTG  
AAATGCGTAGAGATCGGAGGAACACCAGTGGCGAAGGCGGCTTACTGGGCTTAACTGACGCTGAGGCACGAAAGTGTG  
GGTAG

>ASV:136:Family:Ruminococcaceae

TACGTAGGTGGCAAGCGTTGTCCGGAATTACTGGGTGTAAGGGAGCGTAGGCGGGCAGGCAAGTCAAGCGTGAATATA

TCGGCTCAACCGGTAACGGCGCTTGAACCTGCAGGTCTTGAGTGAAGTAGAGGTTGGCGGAATTCCTAGTGTAGCGGTGA  
AATGCGTAGATATTAGGAGGAACACCAAGTGGCGAAGGCGGCCAACTGGGCTTTACTGACGCTGAGGCTCGAAAGTGTG  
GGAG

>ASV:137:Family:Ruminococcaceae

TACGTAGGATGCAAGCGTTATCCGGATTTACTGGGTGTAAGGGAGCGCAGGCGGGACTGCAAGTTGGATGTGAAATACC  
GTGGCTTAACCACGGAAGTGCATCCAAAAGTGTAGTCTTGAGTGAAGTAGAGGCAAGCGGAATTCAGTGTAGCGGTG  
AATGCGTAGATATTGCGAGGAACACCAAGTGGCGAAGGCGGCTTGTCTGGCTTTAACTGACGCTGAGGCTCGAAAGTGTG  
GGAG

>ASV:138:Species:equinus/gallolyticus/infantarius/lutetiensis/salivarius

TACGTAGGTCGCCGAGCGTTGTCCGGATTTATTGGGCGTAAAGCGAGCGCAGGCGGTTAATAAGTCTGAAGTTAAAGGCA  
GTGGCTTAACCATTGTTTCGCTTTGAAAAGTGTAGACTTGTAGTGCAGAAAGGGAGAGTGAATTCATGTGTAGCGGTGA  
AATGCGTAGATATTGAGGAACACCGGTGGCGAAGGCGGCTCTCTGGTCTGTAAGTACGCTGAGGCTCGAAAGCGGTG  
GGAG

>ASV:139:Species:intestinalis

TACGGAGGATCAAGCGTTATCCGGATTTATTGGGTTAAAGGGAGCGTAGGCGGATTATTAAGTCAAGTTGTAAAAGTTT  
GCGGCTCAACCGTAAAATTGCAAGTGTACTGGTAGTCTTGAGTGCAGCAGAGGTAGGCGGAATTCGTGGTGTAGCGGTG  
AATGCTTAGATATCACGAAGAAGTCCGATTGCGAAGGCGAGTACTGGACTGTAAGTACGCTGATGCTCGAAAGTGTG  
GGTAT

>ASV:140:Species:australis/mitis/oralis/parasanguinis/rubneri/sanguinis

TACGTAGGTCGCCGAGCGTTATCCGGATTTATTGGGCGTAAAGCGAGCGCAGGCGGTTAGATAAGTCTGAAGTTAAAGGCT  
GTGGCTTAACCATTAGTACGCTTTGAAAAGTGTAACTTGTAGTGCAGAAAGGGAGAGTGAATTCATGTGTAGCGGTGA  
AATGCGTAGATATTGAGGAACACCGGTGGCGAAGGCGGCTCTCTGGTCTGTAAGTACGCTGAGGCTCGAAAGCGGTG  
GGAG

>ASV:141:Species:plebeius

TACGGAGGATGCGAGCGTTATCCGGATTTATTGGGTTAAAGGGAGCGCAGGCGGTCGTTAAGTCAAGTGTAAAAGTTT  
GGGGCTCAACCTTAAAATTGCAAGTGTACTGGCGTCTTGAGTGCAGGTTGAGGTGTGCGGAATTCGTGGTGTAGCGGTG  
AATGCTTAGATATCACGAAGAAGTCCGATTGCGAAGGCGAGCACACTAAGCCGTAAGTACGCTTATGCTCGAAAGTGTG  
GGTAT

>ASV:142:Genus:Lachnospiraceae\_NK4A136\_group

TACGTAGGGGGCAAGCGTTATCCGGATTTACTGGGTGTAAGGGAGCGTAGACGGTTTTGCAAGTCTGAAGTAAAAGGCC  
GGGGCTTAACCCCGGACTGCTTTGAAAAGTGTAGGACTAGAGTGCAGGAGAGGTAAGTGAATTCCTAGTGTAGCGGTG  
AATGCGTAGATATTAGGAGGAACACCAAGTGGCGAAGGCGGCTTACTGGACTGTAAGTACGCTTGAAGGCTCGAAAGCGTG  
GGAG

>ASV:143:Genus:Lachnoclostridium

TACGTAGGGGGCAAGCGTTATCCGGATTTACTGGGTGTAAGGGAGCGTAGACGGCGGAGCAAGTCTGAAGTAAAAGGCC  
GGGGCTCAACCCCGGACTGCTTTGAAAAGTGTCTGCTAGAGTGTGGAGAGGTAAGTGAATTCCTAGTGTAGCGGTG  
AATGCGTAGATATTAGGAGGAACACCAAGTGGCGAAGGCGGCTTACTGGACAGTAAGTACGCTTGAAGGCTCGAAAGCGTG  
GGAG

>ASV:144:Genus:Alistipes

TACGGAGGATCAAGCGTTATCCGGATTTATTGGGTTAAAGGGTGCAGTAGGCGGTTTTATAAGTTAGAGGTTAAATATC  
GGAGCTTAACTCCGTTATGCCTTAATACTGTAGGACTAGAGAATAGTTGCGGTAGGCGGAATGTATGGTGTAGCGGTGA  
AATGCTTAGATATACAGAAACACCAAGTGGCGAAGGCGAGCTTACCAAAGTACTGACTGACGTTGAGGCTCGAAAGCGTG  
GGAG

>ASV:145:Species:fingoldii

TACGGAGGATCCGAGCGTTATCCGGATTTATTGGGTTAAAGGGAGCGTAGGTTGATTGTTAAGTCAAGTGTAAAAGTTT  
GCGGCTCAACCGTAAAATTGCAAGTGTACTGGCAGTCTTGAGTACAGTAGAGGTGGGCGGAATTCGTGGTGTAGCGGTG  
AATGCTTAGATATCACGAAGAAGTCCGATTGCGAAGGCGAGTCACTGGACTGCAAGTACGCTGATGCTCGAAAGTGTG  
GGTAT

>ASV:146:Family:Ruminococcaceae

TACGTAGGTCGCCAAGCGTTGTCCGGATTTACTGGGTGTAAGGGCGCGTAGGCGGGATGGCAAGTCAAGTGTGAAATCCA  
TGGGCTCAACCATGAAGTGCATTTGAAAAGTGTCTGTTCTTGAGTATCGGAGAGGCAAGCGGAATTCCTAGTGTAGCGGTG  
AATGCGTAGATATTAGGAGGAACACCAAGTGGCGAAGGCGGCTTGTCTGGACGACAAGTACGCTGAGGCGCGAAAGCGTG  
GGAG

>ASV:147:Family:Lachnospiraceae

TACGTAGGGGGCAAGCGTTATCCGGATTTACTGGGTGTAAGGGAGCGTAGACGGAATGGCAAGTCTGATGTGAAAGGCC  
GGGGCTCAACCCCGGACTGCATTGAAAAGTGTCAATCTAGAGTACCGGAGGGTAAGTGAATTCCTAGTGTAGCGGTG  
AATGCGTAGATATTAGGAGGAACACCAAGTGGCGAAGGCGGCTTACTGGACGTTAAGTACGCTTGAAGGCTCGAAAGCGTG  
GGAG

>ASV:148:Genus:Butyricicoccus

TACGTAGGGAGCAAGCGTTATCCGGATTTACTGGGTGTAAGGGCGCGCAGGCGGGCCGTTAAGTTGGAAGTGAATCTA  
TGGGCTTAACCATAAAGTGCCTTTCAAAGTGTCTGTTCTTGAGTGTAGGAGGCGAGGCGGAATTCCTAGTGTAGCGGTG  
AATGCGTAGATATACGAGGAACACCAAGTGGCGAAGGCGGCTTGTCTGGACATTAAGTACGCTGAGGCGCGAAAGCGTG  
GGAG

>ASV:149:Genus:Desulfobivrio

TACGGAGGGTCAAGCGTTAATCGGAATTTACTGGGCGTAAAGCGCGCGTAGGTTGTTTTGTAAGTCAAGGTTAATCCC  
ACGGCTTAACCGTGAAGTGCCTTTGATACTGCATAAAGTGTGATCCGGAGAGGACAGCGGAATTCAGGTGTAGGAGTG  
AATCCGTAGATATCTGGAAGAAGTCAAGTGGCGAAGGCGGCTGCTGGACATTAAGTACGCTGAGGCGCGAAAGCGTG  
GGTAG

>ASV:150:Genus:Faecalitalea  
TACGTAGGTGGCAAGCGTTATCCGGAATCATTGGGCGTAAAGGGTGCCTAGGTGGCACGATAAGTCTGAAGTAAAAGGCA  
ACAGCTCAACTGTTGTATGCTTTGGAACTGTCGAGCTAGAGTGCAGAAGAGGGCGATGGAATTCATGTGTAGCGGTAA  
AATGCGTAGATATATGGAGGAACACCAGTGGCGAAGGCGGCTGCCTGGTCTGTAACCTGACACTGATGCACGAAAGCGTGG  
GGAGC

>ASV:151:Family:Ruminococcaceae  
TACGTAGGTGGCAAGCGTTGTCCGGAATTACTGGGTGTAAAGGGAGCGTAGGCGGGATGCCAAGTCAGCTGTGAAAACCTA  
TGGGCTTAACCCGAGACTGCAGTTGAACTGTTACTTTGAGTGAAGTAGAGGTTGGCGGAATTCAGTGTAGCGGTG  
AAATGCGTAGATATTCGGAGGAACACCAGTGGCGAAGGCGGCCAACTGGGCTTAACTGACGCTGAGGCTCGAAAGTGTG  
GGGAG

>ASV:152:Genus:Methanobrevibacter  
CACCGGCAGCTCTAGTGGTAGCAGTTTTATTGGGCTAAAGCGTCCGTAGCCGGTTTAAATAAGTCTCTGGTGAATCCT  
GCAGCTTAACTGTGGGAATTGCTGGAGATACTATTAGACTTGAATCGGGAGAGGTTAGAGGTTACTCCAGGGTAGAGGT  
GAAATCTGTAACTCTGGGAGGACCGCTGTTGCGAAGGCGTCTGACTGGAACGATTCTGACGGTGAGGACGAAAGCTA  
GGGGC

>ASV:153:Species:eggerthii  
TACGGAGGATCCGAGCGTTATCCGGATTTATTGGGTTTAAAGGGAGCGTAGGCGGGTCTTAAAGTCAGTTGTGAAAGTTT  
GCGGCTCAACCGTAAATTCAGTTGATACTGGGTACTTTGAGTGCAGCATAGGTAGGCGGAATTCGTGGTGTAGCGGTG  
AAATGCTTAGATATCACGAAGAACTCCGATTGCGAAGGCAGCTTACTGGACTGTAACGACGCTGATGCTCGAAAGTGTG  
GGTAT

>ASV:154:Genus:Family\_XIII\_AD3011\_group  
TACGTAGGGGGCGAGCGTTATCCGGAATTTATTGGGCGTAAAGAGTGCCTAGGTGGTAACTTAAAGCGGGGTTTAAAGGCA  
ATGGCTTAAACCTATTGTTCCGCCCTGCGAACTGGGATACTTGAAGTGCAGGAGAGGAAAGCGGAATTCCTAGTGTAGCGGTG  
AATGCGTAGATATTAGGAGGAACACCAGTGGCGAAGGCGGCTTTCTGGACTGAACTGACACTGAGGCACGAAAGTGTGG  
GGAGC

>ASV:155:Genus:Ruminococcaceae\_UCG-014  
TACGTAGGGAGCAAGCGTTATCCGGATTTATTGGGTGTAAAGGGTGCCTAGACGGGAAGGTAAGTTAGTTGTGAAATCCC  
TCGGCTCAACCGGAGTGTGCGCTGAACTGAACTGCTTTTCTTGAAGTGCCTGGAGAGGAAAGTGAATTCCTAGTGTAGCGGTG  
AAATGCGTAGATATTAGGAGGAACACCAGTGGCGAAGGCGACTTTCTGGACAGTAACTGACGTTGAGGCACGAAAGTGTG  
GGGAG

>ASV:156:Genus:Barnesiella  
TACGGAGGATGCAAGCGTTATCCGGATTTATTGGGTTTAAAGGGTGCCTAGGCGGCACGCCAAGTCAGCGGTGAAATTT  
CGGGCTCAACCCGAGTGTGCGCTGAACTGGCGAGCTAGAGTACACAAGAGGCAGGCGGAATGCGTGGTGTAGCGGTG  
AAATGCATAGATATCACGCAGAACCCGATTGCGAAGGCAGCTGCTAGGGTAAACAGACGCTGAGGCACGAAAGCGTG  
GGTAT

>ASV:157:Genus:Ruminococcaceae\_UCG-014  
TACGTAGGGAGCAAGCGTTATCCGGATTTATTGGGTGTAAAGGGTGCCTAGACGGGACAACAAGTTAGTTGTGAAATCCC  
TCGGCTTAACTGAGGAACTGCAACTAAACTATTGTTCTTGAAGTGTGGAGAGGAAAGTGAATTCCTAGTGTAGCGGTG  
AAATGCGTAGATATTAGGAGGAACACCAGTGGCGAAGGCGACTTTCTGGACAATAACTGACGTTGAGGCACGAAAGTGTG  
GGGAG

>ASV:158:Genus:Christensenellaceae\_R-7\_group  
TACGTAGGGGGCGAGCGTTATCCGGAATGATTGGGCGTAAAGGGCGCTAGGCGGCCTGCTAAGTCTGGAGTAAAAGTCC  
TGCTTTCAAGGTGGGAATTGCTTTGGATACTGGTGGCTGGAGTGCAGGAGAGGAAAGCGGAATTCAGGTTAGCGGTG  
AAATGCGTAGAGATCGGTAGGAACACCAGTGGCGAAGGCGGCTTTCTGGACTGAACTGACGCTGAGGCACGAAAGCGTG  
GGGAG

>ASV:159:Genus:Rikenellaceae\_RC9\_gut\_group  
TACGGGGGATGCGAGCGTTATCCGGATTTATTGGGTTTAAAGGGTGCCTAGGCGGCGAATTAAGTCAGCGGTGAAAGACC  
GGGGCTCAACCCGAAAGTGCCTTTGATACTGATTGGCTAGAATACCCTTCCCGTGGGAGGAATGAGTGGTGTAGCGGTG  
AAATGCATAGATATCACTCAGAACACCAGTGGCGAAGGCATCTCACGAAGGGGCGATTGACGCTGAGGCACGAAAGCGTG  
GGGAT

>ASV:160:Species:ulcerans  
TACGTATGTCGCAAGCGTTATCCGGATTTATTGGGCGTAAAGCGCGTCTAGGCGGCTTAGTAAGTCTGATGTGAAAATGC  
GGGGCTCAACCCGATTTGCGTTGGAACTGCTAACTAGAGTACTGGAGAGGTAGGCGGAATACAAGTGTAGAGGTGA  
AATTCGTAGATATTTGTAGGAATGCCGATGGGGAAGCCAGCCTACTGGACAGATACTGACGCTAAAGCGCGAAAGCGTG  
GTAGC

>ASV:161:Genus:Intestinimonas  
TACGTAGGTGGCAAGCGTTATCCGGATTTACTGGGTGTAAAGGGCGTGTAGGCGGGAAGGCAAGTCAGATGTGAAAACCTA  
TGGGCTCAACCCATAGCCTGCATTTGAACTGTTTTCTTGAAGTGCCTGGAGAGGCAATCGGAATTCAGTGTAGCGGTG  
AAATGCGTAGATATACGGAGGAACACCAGTGGCGAAGGCGGATTGCTGGACAGTAACTGACGCTGAGGCACGAAAGCGTG  
GGGAG

>ASV:162:Species:caecimuris  
TACGTAGGGGGCAAGCGTTATCCGGATTTACTGGGTGTAAAGGGAGCGTAGACGGAGCAGCAAGTCTGATGTGAAAGGCG  
GGGGCTCAACCCCGGACTGCATTGAACTGTTGATCTTGAAGTACCAGGAGAGGTAAGCGGAATTCCTAGTGTAGCGGTG  
AAATGCGTAGATATTAGGAGGAACACCAGTGGCGAAGGCGGCTTACTGGACGTTAACTGACGTTGAGGCTCGAAAGCGTG  
GGGAG

>ASV:163:Genus:Lachnospiraceae\_UCG-010  
TACGTAGGGGGCAAGCGTTATCCGGAATTTACTGGGTGTAAAGGGAGCGTAGGCGGCACGCCAAGCCAGATGTGAAAGGCC  
GAGGCTTAACTCGCGGATTGCATTTGAACTGGCGAGCTAGAGTACAGGAGAGGAAAGCGGAATTCCTAGTGTAGCGGTG

GAAATGCGTAGATATTAGGAAGAACCACAGTGGCGAAGGCGGCTTTCTGGACTGAAACTGACGCTGAGGCTCGAAAGCGT  
GGGA  
>ASV:164:Species:splanchnicus  
TACGGAGGATGCGAGCGTTATCCGGATTTATTGGGTTTAAAGGGTGCCTAGGCGGTTTATTAAGTTAGTGGTTAAATATT  
TGAGCTAAACTCAATTGTGCCATTAATACTGGTAACTGGAGTACAGACGAGGTAGGCGGAATAAGTTAAGTAGCGGTGA  
AATGCATAGATATAACTTAGAACTCCGATAGCGAAGGCAGCTTACCAGACTGTAAGTACGCTGATGCACGAGAGCGTGG  
GTAGC  
>ASV:165:Family:Lachnospiraceae  
TACGTAGGGGGCAAGCGTTATCCGGATTTACTGGGTGTAAGGGAGCGTAGACGGCACAGCAAGTCTGAAGTAAATCCC  
CGGGCTCAACCCGGAACTGCTTTGAAACTGTTGGCTAGAGTGTGGAGAGGCAAGCGGAATTCCTAGTGTAGCGGTG  
AAATGCGTAGATATTAGGAGGAACACCAGTGGCGAAGGCGGCTTCTGGACAGTAAGTACGCTTGGAGCTCGAAAGCGTG  
GGAG  
>ASV:166:Genus:Bacteroides  
TACGGAGGATCCGAGCGTTATCCGGATTTATTGGGTTTAAAGGGAGCGTAGATGGATGTTTAAAGTCAAGTGTGAAAGTTT  
GCGGCTCAACCGTAAATTCAGTTGATACTGGATATCTTGGTGCAGTTGAGGCAGGCGGAATTCGTGGTGTAGCGGTG  
AAATGCTTAGATATCACGAAGAACTCAATTGCGAAGGCAGCCTGCTAAGCTGCAACTGACATTGAGGCTCGAAAGTGTG  
GGTAT  
>ASV:167:Genus:Anaerotruncus  
TACGTAGGGAGCGAGCGTTGTCCGGAATTACTGGGTGTAAGGGAGCGTAGGCGGGATGCCAAGTAGAATGTTAAATCCA  
TCGGCTCAACTGGTGGCAGCGTTCTAAACTGGCGTTCTTGGTGCAGTTAGAGGAGGCGGAATTCCTAGTGTAGCGGTGA  
AATGCGTAGATATTAGGAGGAACACCAGTGGCGAAGGCGGCTTCTGGGCTTAACTGACGCTGAGGCTCGAAAGCGTGG  
GGAGC  
>ASV:168:Genus:Lachnoclostridium  
TACGTAGGGGGCAAGCGTTATCCGGATTTACTGGGTGTAAGGGAGCGTAGACGGCGAAGCAAGTCTGAAGTAAAGCCC  
GGGGCTCAACCGCGGACTGCTTTGAAACTGTTTTGCTAGAGTGTGGAGAGGTAAGTGAATTCCTAGTGTAGCGGTG  
AAATGCGTAGATATTAGGAGGAACACCAGTGGCGAAGGCGGCTTACTGGACAGTAAGTACGCTTGGAGCTCGAAAGCGTG  
GGAG  
>ASV:169:Genus:Ruminococcaceae\_UCG-002  
TACGTAGGTGGCAAGCGTTGTCCGGAATTACTGGGTGTAAGGGCGTGTAGCCGGGAGGGCAAGTCAAGTGTGAAATCCA  
CGGGCTTAACTCGTGAAGTGCATTTGAAACTGTTCTTCTTGGTGCAGTTAGAGGAGGCAATCGGAATTCCTAGTGTAGCGGTG  
AAATGCGTAGATATTAGGAGGAACACCAGTGGCGAAGGCGGATTCTGGACGACAAGTACGCTTGGAGGCGCAAGCGTGG  
GGAG  
>ASV:170:Genus:Lachnospiraceae\_NK4A136\_group  
TACGTAGGGGGCAAGCGTTATCCGGATTTACTGGGTGTAAGGGAGCGTAGACGGCAAGGCAAGTCTGAAGTAAAGCCC  
GGTGTCTAACCGCGGACTGCTTTGAAACTGTTTGGCTGGAGTGCAGGAGGTAAGCGGAATTCCTAGTGTAGCGGTG  
AAATGCGTAGATATTAGGAAGAACCACAGTGGCGAAGGCGGCTTACTGGACGTAAGTACGCTTGGAGCTCGAAAGCGTG  
GGAG  
>ASV:171:Species:prausnitzii  
AACGTAGGTCACAAGCGTTGTCCGGAATTACTGGGTGTAAGGGAGCGCAGGCGGGAAGGCAAGTTGGAAGTAAATCCA  
TGGGCTCAACCCATGAACTGCTTTCAAACCTGTTTTCTTGGTGCAGTGCAGAGGTAGGCGGAATTCCTGGTGTAGCGGTG  
GAATGCGTAGATATCGGAGGAACACCAGTGGCGAAGGCGGCTTACTGGGCACCAACTGACGCTGAGGCTCGAAAGTGTG  
GGTAG  
>ASV:172:Species:ihumii  
TACGGAGGATCCGAGCGTTATCCGGATTTATTGGGTTTAAAGGGTGCCTAGGCTGTTTTTAAAGTTAGAGGTGAAAGCTC  
GACGCTCAACGTCGAAATTGCCTCTGATACTGAGAGACTAGAGTGTAGTTGCGGAAGGCGGAATGTGTGGTGTAGCGGTG  
AAATGCTTAGATATCACACAGAACCAGTGGCGAAGGCAGCTTCCAAGCTATTACTGACGCTGAGGCACGAAAGCGTG  
GGAG  
>ASV:173:Genus:Lachnospiraceae\_NK4A136\_group  
TACGTAGGGGGCAAGCGTTATCCGGATTTACTGGGTGTAAGGGAGCGTAGACGGCAAGGCAAGTCTGAAGTAAAGCCC  
GGTGTCTAACCGCGGACTGCTTTGAAACTGTTTAGCTGGAGTGCAGGAGGTAAGCGGAATTCCTAGTGTAGCGGTG  
AAATGCGTAGATATTAGGAAGAACCACAGTGGCGAAGGCGGCTTACTGGACGTAAGTACGCTTGGAGCTCGAAAGCGTG  
GGAG  
>ASV:174:Genus:Bacteroides  
TACGGAGGATCCGAGCGTTATCCGGATTTATTGGGTTTAAAGGGAGCGTAGGTTGGATTGTTAAGTCAAGTGTGAAAGTTT  
GCGGCTCAACCGTAAATTCAGTTGAAACTGGTAGTCTTGGTGCAGTACAGTAGAGGTGGGCGGAATTCGTGGTGTAGCGGTG  
AAATGCTTAGATATCACGAAGAACTCCGATTGCGAAGGCAGCTCACTAGACTGTTACTGACACTGATGCTCGAAAGTGTG  
GGTAT  
>ASV:175:Genus:Alloprevotella  
TACGGAAGGTCCAGGCGTTATCCGGATTTATTGGGTTTAAAGGGAGCGCAGGCGGACTCTTAAAGTCAAGTGTGAAATACG  
GCGGCTCAACCGTGGACTGCAAGTTGATACTGGAGTCTTGGTGCACACAGGGATGCTGGAATTCATGGTGTAGCGGTG  
AAATGCTCAGATATCATGAAGAACTCCGATCGCGAAGGCAGGTATCCGGGTGCAACTGACGCTGAGGCTCGAAAGTGGC  
GGTAT  
>ASV:176:Species:vulgatus  
TACGGAGGATCCGAGCGTTATCCGGATTTATTGGGTTTAAAGGGAGCGTAGATGGATGTTTAAAGTCAAGTGTGAAAGTTT  
GCGGCTCAACCGTAAATTCAGTTGATACTGGATATCTTGGTGCAGTTGAGGCAGGCGGAATTCGTGGTGTAGCGGTG  
AAATGCTTAGATATCACGAGAACTCCGATTGCGAAGGCAGCCTGCTAAGCTGCAACTGACATTGAGGCTCGAAAGTGTG  
GGTAT  
>ASV:177:Family:Lachnospiraceae

TACGTATGGTGAAGCGTTATCCGGATTTACTGGGTGTAAAGGGAGCGTAGACGGAGTGGAAGTCTGATGTGAAAACCC  
GGGGCTCAACCCGGGACTGCATTGAAAAGTGTCAATCTGGAGTACCGGAGAGGTAAGCGGAATTCCTAGTGTAGCGGTG  
AAATGCGTAGATATTAGGAGGAACACCAGTGGCGAAGGCGGCTTACTGGACGTAACGACGTTGAGGCTCGAAAGCGTG  
GGGAG  
>ASV:178:Family:Lachnospiraceae  
TACGTAGGGGGCAAGCGTTATCCGGATTTACTGGGTGTAAAGGGAGCGCAGGCGGCATGATAAGTCTGATGTGAAAACCC  
AAGGCTCAACCATGGGACTGCATTGAAAAGTGTCTGTCTGGAGTGTCTGGAGAGGTAAGCGGAATTCCTAGTGTAGCGGTG  
AAATGCGTAGATATTAGGAGGAACACCAGTGGCGAAGGCGGCTTACTGGACGATGACTGACGCTGAGGCTCGAAAGCGTG  
GGGAG  
>ASV:179:Species:pectinoschiza  
TACGTATGGAGCAAGCGTTATCCGGATTTACTGGGTGTAAAGGGAGTGTAGGTGGCATCACAAAGTCAGAAGTGAAAAGCCC  
GGGGCTCAACCCGGGACTGCTTTTAAAAGTGTGGAGCTGGAGTGCAGGAGAGGCAAGTGGAATTCCTAGTGTAGCGGTG  
AAATGCGTAGATATTAGGAGGAACACCAGTGGCGAAGGCGGCTTGTCTGGACTGTAACGACACTGAGGCTCGAAAGCGTG  
GGGAG  
>ASV:180:Genus:Bacteroides  
TACGGAGGATCCGAGCGTTATCCGGATTTATTGGGTTTAAAGGGAGCGTAGGTGGATTGTTAAGTCAGTTGTGAAAATTT  
GCGGCTCAACCGTAAAATTGCAAGTGTAAAAGTGGGAGTCTTGGAGTACAGTAGAGGTGGCGGAATTCGTGGTGTAGCGGTG  
AAATGCTTAGATATCACGAAGAACTCCGATTGCGAAGGCAGCTCACTAGACTGTTACTGACACTGATGCTCGAAAGTGTG  
GGTAT  
>ASV:181:Species:adhaesiva/ginsenosidimutans/yunnanensis  
TACGGAGGGAGCTAGCGTTGTTTCGGAATTTACTGGGCGTAAAGCGCACGTAGGCGGCTTTGTAAGTCAGGGGTGAAAAGCCT  
GGAGCTCAACTCCAGAACTGCCTTTGAGACTGCATCGCTTGAATCCGGGAGAGGTGAGTGGAATTCGAGTGTAGAGGTG  
AAATTCGTAGATATTGGAAGAACACCAGTGGCGAAGGCGGCTCACTGGACCGGTATTGACGCTGAGGTGCGAAAGCGTG  
GGGAG  
>ASV:182:Genus:Ruminococcaceae\_UCG-005  
TACGTAGGTGGCAAGCGTTGTCCGGATTTACTGGGTGTAAAGGGCGTGTAGGCGGAGATGCAAGTCAGATGTGAAAATCCT  
CGGGCTTAACCCGGGAACTGCATTTGAAAAGTGTATCCCTTGGAGTATCGGAGAGGCAGGCGGAATTCCTAGTGTAGCGGTG  
AAATGCGTAGATATTAGGAGGAACACCAGTGGCGAAGGCGGCTTGTCTGGACGACAACGACGCTGAGGCGCGAAAGCGTG  
GGGAG  
>ASV:183:Genus:Alloprevotella  
TACGGAAGGTCCAGGCGTTATCCGGATTTATTGGGTTTAAAGGGAGCGCAGGCGGGCGCTAAGTCAGTTGTGAAAATCCT  
GCGGCTTAACCGTCAATTGCAAGTGTGATACTGCGCTGCTTGGAGTGCACACAGGGATGTTGGAATTCATGGTGTAGCGGTG  
AAATGCTTAGATATCATGAAGAACTCCGATGCGGAAGGCATATGTCTGGAGTGAACACTGACGCTGAGGCTCGAAAGTGTG  
GGTAT  
>ASV:184:Family:Family\_XIII  
TACGTAGGGGGCGAGCGTTATCCGGAATTTATTGGGCGTAAAGAGTGCCTAGGTGGCTTTTAAAGCGGGGTTTAAAGGCA  
ATGGCTTAACCAATTGTTAAGCTATGGAAGTGGAACTGGAGAGCTTGGAGTGCAGAGAGGAAAGCGGAATTCCTAGTGTAGCGGTG  
AATGCGTAGATATTAGGAGGAACACCAGTGGCGAAGGCGGCTTCTGGACTGTTACTGACACTGAGGCACGAAAGTGTGG  
GGAGC  
>ASV:185:Family:Erysipelotrichaceae  
TACGTAGGTGGCAAGCGTTATCCGGAATCATTGGGCGTAAAGGGTGCCTAGGTGGCGTACTAAGTCTGTAGTAAAAGGCA  
ATGGCTCAACCAATTGTAAGCTATGGAAGTGGTATGCTGGAGTGCAGAAAGAGGCGATGGAATTCATGTGTAGCGGTAA  
AATGCGTAGATATTAGGAGGAACACCAGTGGCGAAGGCGGCTGCTGTAACACTGACACTGAGGCACGAAAGCGGTG  
GGAGC  
>ASV:186:Species:antarctica/auricularis/azotoformans/brenneri/canadensis/cedrina/cerasi/cf./  
costantinii/extremaustralis/extremorientalis/fluorescens/gessardii/grimontii/lactis/libanensis/  
lurida/mandelii/marginalis/meridiana/paralactis/poae/proteolytica/putida/reactans/salomonii/  
simiae/syncyanea/synxantha/tolaasii/trivialis/veronii  
TACAGAGGGTGAAGCGTTAATCCGGAATTTACTGGGCGTAAAGCGCGCTAGGTGGTTTGTAAAGTTGGATGTGAAAATCCC  
CGGGCTCAACCTGGGAACTGCATTCAAAGTACTGACTAGAGTATGGTAGAGGGTGGTGGAAATTCCTGTGTAGCGGTG  
AAATGCGTAGATATTAGGAGGAACACCAGTGGCGAAGGCGACCACTGGACTAATACTGACACTGAGGTGCGAAAGCGTG  
GGGAG  
>ASV:187:Genus:Lachnoclostridium  
TACGTAGGGGGCAAGCGTTATCCGGATTTACTGGGTGTAAAGGGAGCGCAGACGGCGATGCAAGTCTGGAGTAAAAGCCC  
GGGGCTCAACCCGGGACTGCTTTGAAAAGTGTATGGCTAGAGTGTCTGGAGAGGCAAGCGGAATTCCTAGTGTAGCGGTG  
AAATGCGTAGATATTAGGAGGAACACCAGTGGCGAAGGCGGCTTGTCTGGACAGTAACGACGTTGAGGCTCGAAAGCGTG  
GGGAG  
>ASV:188:Genus:Barnesiella  
TACGGAGGATGCGAGCGTTATCCGGATTTATTGGGTTTAAAGGGTGCCTAGGCGGCACGCCAAGTCAGCGGTGAAAATTTT  
CGGGCTCAACCCGGACTGTGCCGTTGAAAAGTGGCGAGCTAGAGTGCACAAGAGGCGAGGCGGAATGCGTGGTGTAGCGGTG  
AAATGCATAGATATCACGCAGAACCCGATTGCGAAGGCAGCTGCTAGGTTGCGACAGACGCTGAGGCACGAAAGCGTG  
GGTAT  
>ASV:189:Species:ruminis  
TACGTAGGTGGCGAGCGTTGTCCGGATTTATTGGGCGTAAAGGGAACGCAGGCGGCTTTTAAAGTCTGATGTGAAAAGCCT  
TCGGCTTAACCGAAGTGTGCAATTGAAAAGTGGAAAGACTTGGAGTGCAGAAAGAGGAGTGGAACTCCATGTGTAGCGGTG  
AAATGCGTAGATATTAGGAGGAACACCAGTGGCGAAGGCGGCTTCTGCTGTTGTAACGACGCTGAGGTTGCGAAAGCGTG  
GGTAG  
>ASV:190:Species:succinatutens

TACGTAGGTGGCGAGCGTTGTCCGGAATTATTGGGCGTAAAGAGCATGTAGGCGGTTTTTTAAGTCTGGAGTAAAATGC  
GGGGCTCAACCCCGTATGGCTCTGGATACTGGAAGACTTGAGTGCAGGAGAGAAAGGGGAATCCAGTGTAGCGGTGA  
AATGCGTAGATATTGGGAGGAACACCAAGTGGCGAAGGCGCCTTCTGGACTGTGTCTGACGCTGAGATGCGAAAGCCAGG  
GTAGC

>ASV:191:Species:baumannii/beijerinckii/bereziniae/calcoaceticus/courvalinii/gerneri/  
guillouiae/gyllenbergii/indicus/johnsonii/junii/lwoffii/modestus/parvus/plantarum/  
proteolyticus/vivianii

TACGAGGGGTGCGAGCGTTAATCGGATTTACTGGGCGTAAAGCGTGCCTAGGCGGCTTTTTAAGTCGGATGTGAAATCCC  
CGAGCTTAACCTGGGAATTGCATTGATACTGGGAAGCTAGAGTATGGGAGAGGATGGTAGAATCCAGGTGTAGCGGTG  
AAATGCGTAGAGATCTGGAGGAATACCGATGGCGAAGGCAGCATCTGGCTAATACTGACGCTGAGGTACGAAAGCATG  
GGGAG

>ASV:192:Genus:Paraprevotella

TACGGAAGATGCGAGCGTTATCCGGATTTATTGGGTTAAAGGGAGCGTAGGCGGGCTTTAAGTCAGCGGTCAAATGCC  
ACGGCTCAACCGTGGCCAGCCGTTGAAACTGCAAGCCTTGAGTCTGCACAGGGCACATGGAATTCGTGGTGTAGCGGTGA  
AATGCTTAGATATCACGAAGAACTCCGATCGCGAAGGCATTGTGCCGGGCAGCACTGACGCTGAGGCTCGAAAGTCCG  
GTATC

>ASV:193:Species:acidifaciens

TACGAGGATCCGAGCGTTATCCGGATTTATTGGGTTAAAGGGAGCGTAGGTGGATTGTTAAGTCAGTTGTGAAAGTTT  
GCGGCTCAACCGTAAAATTGCAGTTGAAACTGGCAGTCTTGAGTACAGTAGAGGTGGCGGAATTCGTGGTGTAGCGGTG  
AAATGCTTAGATATCACGAAGAACTCCGATTGCGAAGGCAGCTCACTGGACTGTTGACTGACACTGAGGCTCGAAAGTGT  
GGTA

>ASV:194:Family:Burkholderiaceae

TACGTAGGGTGGCGAGCGTTAATCGGAATTACTGGGCGTAAAGCGTGCAGGCGGTTATGTAAGACAGATGTGAAATCCC  
CGGGCTCAACCTGGGAAGTGCATTTGTGACTGCATAGCTAGAGTACGGCAGAGGGGATGGAATTCGCGTGTAGCAGTG  
AAATGCGTAGATATGCGGAGGAACACCGATGGCGAAGGCAATCCCCTGGGCTGTACTGACGCTCATGCACGAAAGCGTG  
GGGAG

>ASV:195:Genus:Prevotella\_2

TACGGAAGGTCCGGGCGTTATCCGGATTTATTGGGTTAAAGGGAGCGTAGGCGGCTGTGTTAAGCGTGTGTGAAATGTC  
GGGGCTCAACCTGGGCAATGACGCGCAACTGGCAGACTTGAGTGCAGGAAGTAGGCGGAATTCGTGCTGTAGCGGTG  
AAATGCTTAGATATGACGAAGAACTCCGATTGCGAAGGCAGCTGCTGTAGCGTAACTGACGCTGAAGCTCGAAAGCGTG  
GGTAT

>ASV:196:Genus:Prevotella\_9

TACGGAAGGTCCGGGCGTTATCCGGATTTATTGGGTTAAAGGGAGCGTAGGCGGAGATTAAGCGTGTGTGAAATGTA  
GATGCTCAACGCTGCACTGCAGCGCAACTGGTTTCTTGTAGTACGCACAAAGTGGGCGGAATTCGTGGTGTAGCGGTG  
AAATGCTTAGATATCACGAAGAACTCCGATTGCGAAGGCAGCTCACTGGAGCGCAACTGACGCTGAAGCTCGAAAGTCCG  
GGTAT

>ASV:197:Genus:Ruminococcaceae\_NK4A214\_group

TACGTAGGTGGCAAGCGTTGTCCGGATTTACTGGGTGTAAGGGCGCGTAGGCGGGGAGACAAGTCAGATGTGAAATCTA  
TGGGCTTAACCATAAACTGCATTTGAAACTATTTCTCTTGTAGTGTGGAGAGGCAAGCGGAATTCCTAGTGTAGCGGTG  
AAATGCGTAGATATTAGGAGGAACACCAAGTGGCGAAGGCGGCTTGTGGACATTAAGTACGCTGAGGCGCGAAAGCGTG  
GGGAG

>ASV:198:Genus:Lachnospira

TACGTATGGAGCAAGCGTTATCCGGATTTACTGGGTGTAAGGGAGGTGTAGGTGGTATCACAAAGTCAGAAGTAAAAGCCC  
GGGGCTCAACCCGGGACTGCTTTTGAAGTGTGAACTGGAGTGCAGGAGAGGTAAGTGAATTCCTAGTGTAGCGGTG  
AAATGCGTAGATATTAGGAGGAACACCAAGTGGCGAAGGCGGCTTACTGGACTGTAAGTACACTGAGGCTCGAAAGCGTG  
GGGAG

>ASV:199:Genus:Lachnoclostridium

TACGTAGGGGGCAAGCGTTATCCGGATTTACTGGGTGTAAGGGAGCGTAGACGGTAAAGCAAGTCTGAAGTAAAAGCCC  
GCGGCTCAACTGCGGACTGCTTTTGAAGTGTGAACTGGAGTGTGCGGAGAGGTAAGTGAATTCCTAGTGTAGCGGTG  
AAATGCGTAGATATTAGGAGGAACACCAAGTGGCGAAGGCGGCTTACTGGACGATAACTGACGTTGAGGCTCGAAAGCGTG  
GGGAG

>ASV:200:Family:Lachnospiraceae

TACGTAGGGGGCAAGCGTTATCCGGATTTACTGGGTGTAAGGGAGCGTAGACGGCGAGACAAGTCTGAAGTAAAAGCCC  
GGGGCTCAACCCGGGACTGCTTTTGAAGTGCCTTGTAGAGTGTGCGGAGAGGTAAGTGAATTCCTAGTGTAGCGGTG  
AAATGCGTAGATATTAGGAGGAACACCAAGTGGCGAAGGCGGCTTACTGGACGATAACTGACGTTGAGGCTCGAAAGCGTG  
GGGAG

>ASV:201:Genus:Lachnospiraceae\_UCG-004

TACGTAGGGGGCAAGCGTTATCCGGATTTACTGGGTGTAAGGGAGCGTAGACGGCGACGCAAGTCTGAAGTAAAATACC  
CGGGCTCAACCTGGGAAGTGCATTTGAAACTGTGTTGCTAGAGTGTGCGGAGAGGTAAGCGGAATTCCTAGTGTAGCGGTG  
AAATGCGTAGATATTAGGAGGAACACCAAGTGGCGAAGGCGGCTTACTGGACGATAACTGACGTTGAGGCTCGAAAGCGTG  
GGGAG

>ASV:202:Genus:Lachnospira

TACGTATGGAGCAAGCGTTATCCGGATTTACTGGGTGTAAGGGAGGTGTAGGTGGCCAGGCAAGTCTGAAGTAAAAGCTC  
GGGGCTCAACCCGGGACTGCTTTTGAAGTGCAGGGCTAGAGTGCAGGAGGGCAAGTGAATTCCTAGTGTAGCGGTG  
AAATGCGTAGATATTAGGAGGAACACCAAGTGGCGAAGGCGGCTTGTGGACTGTAAGTACACTGAGGCTCGAAAGCGTG  
GGGAG

>ASV:203:Species:hathewayi

TACGTAGGGGGCAAGCGTTATCCGGATTTACTGGGTGTAAGGGAGCGTAGACGGTTTAGCAAGTCTGAAGTAAAAGCCC

GGGGCTCAACCCGGTACTGCTTTGAAACTGTTAGACTTGTAGTGCAGGAGAGGTAAGTGAATTCCTAGTGTAGCGGTG  
AAATGCGTAGATATTAGGAGGAACACCAGTGGCGAAGGCGGCTTACTGGACTGTAACGTGACGTTGAGGCTCGAAAGCGTG  
GGGAG  
>ASV:204:Genus:CAG-56  
TACGTAGGGGGCAAGCGTTATCCGGATTTACTGGGTGTAAGGGGAGCGTAGACGGCGAGGCAAGTCTGATGTGAAAACCC  
GGGGCTCAACCCGTACTGCATTGAAACTGTTTTGCTTGTAGTGCAGGAGAGGTAAGCGGAATTCCTAGTGTAGCGGTG  
AAATGCGTAGATATTAGGAGGAACACCAGTGGCGAAGGCGGCTTACTGGACGGCAACTGACGTTGAGGCTCGAAAGCGTG  
GGGAG  
>ASV:205:Family:Christensenellaceae  
TACGTAGGGGGCGAGCGTTGTCCGGAATTACTGGGCGTAAAGGGTGCCTAGGCGGTTTGGTAAGTTGGATGTGAAATACC  
CGGGCTTAACCTGGGGCTGCATCCAATACTGTCGGACTTGTAGTGCAGGAGAGGAAAGCGGAATTCCTAGTGTAGCGGTG  
AAATGCGTAGATATTAGGAGGAACACCAGTGGCGAAGGCGGCTTCTGGACTGTAACGTGACGCTGAGGCACGAAAGCGTG  
GGGAG  
>ASV:206:Genus:Clostridium\_sensu\_stricto\_1  
TACGTAGGTGGCGAGCGTTGTCCGGATTTACTGGGCGTAAAGGGGAGCGTAGGCGGATTTTAAAGTGTGATGTGAAATACT  
CGGGCTTAACCTGAGTGTGATTTCAAACCTGGAAGTCTAGAGTGCAGGAGAGGAGAAGGGAATTCCTAGTGTAGCGGTG  
AAATGCGTAGAGATTAGGAAGAACACCAGTGGCGAAGGCGCTTCTCTGGACTGTAACGTGACGCTGAGGCTCGAAAGCGTG  
GGGAG  
>ASV:207:Genus:Klebsiella  
TACGGAGGGTCAAGCGTTAATCCGGAATTACTGGGCGTAAAGCGCACGAGGCGGTCTGTCAAGTCCGATGTGAAATCCC  
CGGGCTCAACCTGGGAACTGCATTCGAAACTGGCAGGCTAGAGTCTTGTAGAGGGGGGTAGAATTCAGGTGTAGCGGTG  
AAATGCGTAGAGATCTGGAGGAATACCAGTGGCGAAGGCGGCCCCCTGGACAAGACTGACGCTCAGGTGCGAAAGCGTG  
GGGAG  
>ASV:208:Genus:Ruminococcaceae\_UCG-005  
TACGTAGGTTGCAAGCGTTGTCCGGATTTACTGGGTGTAAGGGGCGTGTAGGCGGAGATGCAAGTTGGGAGTGAATCCA  
TGGGCTCAACCCATGAACTGTCTCAAACCTGTATCCCTTGTAGTATCGGAGAGGCAAGCGGAATTCCTAGTGTAGCGGTG  
AAATGCGTAGATATTAGGAGGAACACCAGTGGCGAAGGCGGCTTGTCTGGACGACAACGTGACGCTGAGGCGCGAAAGCGTG  
GGGAG  
>ASV:209:Genus:Agathobacter  
TACGTATGGAGCAAGCGTTATCCGGATTTACTGGGTGTAAGGGGAGCGTAGGCGGCTCTGCAAGTCTGATGTGAAAGGCC  
GGGGCTCAACCCGGGACTGCATTGAAACTGTAGGACTAGAGTGTCCGAGGGGTAAGTGAATTCCTAGTGTAGCGGTG  
AAATGCGTAGATATTAGGAGGAACACCAGTGGCGAAGGCGGCTTACTGGACGACTACTGACGCTGAGGCTCGAAAGCGTG  
GGGAG  
>ASV:210:Genus:Ruminococcaceae\_UCG-002  
TACGTAGGTGGCAAGCGTTGTCCGGATTTACTGGGTGTAAGGGGCGTGTAGCCGGGAAGGCAAGTCAAGTGTGAAATCCA  
CGGGCTTAACCTCGTGAAGTGCATTTGAAACTACTTTTCTTGTAGTATCGGAGAGGCAATCGGAATTCCTAGTGTAGCGGTG  
AAATGCGTAGATATTAGGAGGAACACCAGTGGCGAAGGCGGATTGTCTGGACGACAACGTGACGCTGAGGCGCGAAAGCGTG  
GGGAG  
>ASV:211:Genus:Sutterella  
TACGTAGGGTCAAGCGTTAATCCGGAATTACTGGGCGTAAAGGGTGCAGGCGGCTGTGCAAGACAGATGTGAAATCCC  
CGGGCTTAACCTGGGAACTGCATTTGTACTGCACGGCTAGAGTTTGTGAGAGGAGGTTGGAATTCGCGGTGTAGCAGTG  
AAATGCGTAGATATGCGGAAGAACACCAATGGCGAAGGCGGCTTCTGGACATGACTGACGCTCATGCACGAAAGCGTG  
GGGAG  
>ASV:212:Species:intestinalis  
TACGTATGGTCAAGCGTTATCCGGATTTACTGGGTGTAAGGGGAGCGTAGACGGATAGGCAAGTCTGGAGTAAAACCC  
AGGGCTCAACCTGGGACTGCTTTGAAACTGCAGATCTGGAGTGCAGGAGAGGTAAGCGGAATTCCTAGTGTAGCGGTG  
AAATGCGTAGATATTAGGAGGAACACCAGTGGCGAAGGCGGCTTACTGGACGGTACTGACGTTGAGGCTCGAAAGCGTG  
GGGAG  
>ASV:213:Genus:Faecalibacterium  
AACGTAGGTCAACCGTGTGTCCGGAATTACTGGGTGTAAGGGGAGCGCAGGCGGGAAGGCAAGTTGGAAGTAAAATCTA  
TGGGCTCAACCCATAAACTGCTTTCAAACCTGTTTTCTTGTAGTGTGACAGAGGTAGGCGGAATTCGCGGTGTAGCGGTG  
GAATGCGTAGATATCGGAGGAACACCAGTGGCGAAGGCGGCTTACTGGGCACCAACTGACGCTGAGGCTCGAAAGTGTG  
GGTAG  
>ASV:214:Family:Ruminococcaceae  
TACGTAGGTGGCAAGCGTTGTCCGGAATTACTGGGTGTAAGGGGAGCGTAGGCGGGATGCCAAGTCACTGTGAAAACCTA  
TGGGCTTAACCTGTAGACTGCAGTTGAAACTGGTATTCTTGTAGTGAAGTAGAGTTGGCGGAATTCGAGTGTAGCGGTG  
AAATGCGTAGATATTGAGGGAACACCAGTGGCGAAGGCGGCAACTGGGCTTAACTGACGCTGAGGCTCGAAAGTGTG  
GGGAG  
>ASV:215:Species:intestinihominis  
TACGGAGGATGCGAGCGTTATCCGGATTTATTGGGTTTAAAGGGTGCCTAGGCGGCACGCCAAGTCAAGCGGTGAAATTT  
CGGGCTCAACCCGAGTGTGCCGTTTGGAAACTGGCAGCTAGAGTACACAAGAGGCGAGGCGGAATGCGTGGTGTAGCGGTG  
AAATGCGTAGATATACGCAGAACCCGATTGCGAAGGCGGCTGCTAGGTTGAAACAGACGCTGAGGCACGAAAGCGGTG  
GGTAT  
>ASV:216:Genus:Faecalitalea  
TACGTAGGTGGCGAGCGTTATCCGGAATCATTGGGCGTAAAGGGTGCAGGCGGTTGATACATTAAGTCCGAAAGTAAAAGGCA  
GCAGCTCAACTGCTGTTGGCTTTGGAAACTGGTGAACCTGGAGTGCAGGAGAGGCGGATGGAATTCATGTGTAGCGGTAA  
AATGCGTAGATATATTGAGGGAACACCAGTGGCGAAGGCGGCTGCTGGCTGCAACTGACACTGAGGCACGAAAGCGGTG  
GGAGC



>ASV:217:Family:Ruminococcaceae  
TACGTAGGGGGCAAGCGTTGTCCGGAATTACTGGGTGTAAAGGGAGCGCAGGCGGAGAAGCAAGTCAGTGGTGAAAACGA  
TGGGCTTAACCTCATCGACTGCCATTGAAACTGTTTCCCTTGAGTGAAGTAGAGGCAGGCGGAATTCAGTGTAGCGGTG  
AAATGCGTAGATATTAGGAGGAACACCAGTGGCGAAGGCGGCTTCTGGGCTTAACTGACGCTGAGGCTCGAAAGTGTG  
GGGAG

>ASV:218:Order:Clostridiales  
TACGTAGGGGGCGAGCGTTGTCCGGAATTACTGGGCGTAAAGGGAGCGTAGGCGGTGCGATTAAGTTAGATGTGAAACCC  
CGGGCTTAACCTGGGACTGCATTGAAACTGTTGACTTAGAGTACAGGAGGGAAGCGGAATTCCTAGTGTAGCGGTG  
GAAATGCGTAGATATTAGGAGGAACACCAGTGGCGAAGGCGGCTTCTGGACTGACACTGACGCTGAGGCTCGAAAGCGT  
GGGA

>ASV:219:Genus:Caproiciproducens  
TACGTAGGGAGCGAGCGTTGTCCGGAATTACTGGGTGTAAAGGGTGCCTAGGCGGCAGAGCAAGTCAGATGTGAAATACA  
CGGGCTTAACCCGCTGGCTGCATTGAAACTGTTGACTTAGAGTGAAGCAGAGGCAGGCGGAATTCCTAGTGTAGCGGTG  
AAATGCGTAGAGATCGGGAGGAACACCAGTGGCGAAGGCGGCTTCTGGGCTTAACTGACGCTGAGGCACGAAAGCGTG  
GGTAG

>ASV:220:Genus:Lachnospiraceae\_UCG-001  
TACGTAGGGGGCAAGCGTTATCCGGATTTACTGGGTGTAAAGGGAGCGCAGGCGGTGCGGCAAGTCAGATGTGAAAACCC  
GGGGCTTAACCCAGGACTGCATTGAAACTGTCGGACTAGAGTGCCGGAGAGGTAAGTGGAATTCCTAGTGTAGCGGTG  
AAATGCGTAGATATTAGGAGGAACACCAGTGGCGAAGGCGGCTTACTGGACGGTAAGTACGCTGAGGCTCGAAAGCGTG  
GGGAG

>ASV:221:Species:hansenii/marasmi/producta  
TACGTAGGGGGCAAGCGTTATCCGGATTTACTGGGTGTAAAGGGAGCGTAGACGGAAGAGCAAGTCTGATGTGAAAGGCT  
GGGGCTTAACCCAGGACTGCATTGAAACTGTTTTCTAGAGTGCCGGAGAGGTAAGCGGAATTCCTAGTGTAGCGGTG  
AAATGCGTAGATATTAGGAGGAACACCAGTGGCGAAGGCGGCTTACTGGACGGTAAGTACGCTGAGGCTCGAAAGCGTG  
GGGAG

>ASV:222:Genus:UBA1819  
AACGTAGGTGGCAAGCGTTGTCCGGAATTACTGGGTGTAAAGGGAGCGCAGGCGGAGAGCAAGTTGGGAGTGAATCTG  
TGGGCTTAACCCACAAATTGCTTTCAAACCTGTTTTCTTAGAGTGGTGTAGAGGTAGGCGGAATTCCTAGTGTAGCGGTG  
GAATGCGTAGATATTAGGAGGAACACCAGTGGCGAAGGCGGCTTACTGGGCACTAACTGACGCTGAGGCTCGAAAGCATG  
GGTAG

>ASV:223:Species:cf./elsdenii/hominis  
TACGTAGGTGGCAAGCGTTGTCCGGAATTATTGGGCGTAAAGGGCGCGCAGGCGGCGTCTGTAAGTCTGTTAAAAGTGC  
GGGGCTTAACCCGAGGAGGACCGAAACTGCGATGCTAGAGTATCGGAGAGGAAAGCGGAATTCCTAGTGTAGCGGTGA  
AATGCGTAGATATTAGGAGGAACACCAGTGGCGAAGGCGGCTTCTGGACGACAACTGACGCTGAGGCGGAAAGCCAGG  
GGAGC

>ASV:224:Genus:Solobacterium  
TACGTAGGTAGCGAGCGTTATCCGGAATTATTGGGCGTAAAGGGTGCCTAGGCGGCTGTTAAGTTTATGGTAAAAGCGT  
GGGGCTCAACCCCATAAAGCCATAGATACTGGCAGGCTAGAGTACTGGAGAGGGTAGTGAATTCATGTGTAGCGGTAA  
AATGCGTAGATATTAGGAGGAACACCAGTGGCGAAGGCGGCTACCTAGACAGAGACTGACGCTGAGGCACGAAAGCGTGG  
GGAGC

>ASV:225:Genus:Fusobacterium  
TACGTATGTCGCAAGCGTTATCCGGATTTATTGGGCGTAAAGCGCGTCTAGGCGGTTTGGTAAGTCTGATGTGAAAATGC  
GGGGCTCAACTCCGATTGCGTTGAAACTGCCAACTAGAGTACTGGAGAGGTAGGCGGAACTACAAGTGTAGAGGTGA  
AATTCGTAGATATTGTAGGAATGCCGATGGGAAGCCAGCCTACTGGACAGATACTGACGCTAAAGCGCGAAAGCGTGG  
GTAGC

>ASV:226:Genus:Ruminococcaceae\_UCG-005  
TACGTAGGTGGCAAGCGTTGTCCGGAATTTACTGGGTGTAAAGGGCGTGTAGGCGGAGCTGCAAGTCAGATGTGAAATCTC  
TGGGCTCAACCCAGAACTGCATTGAAACTGTAGCCCTTGAGTATCGGAGAGGCAAGCGGAATTCCTAGTGTAGCGGTG  
AAATGCGTAGATATTAGGAGGAACACCAGTGGCGAAGGCGGCTTCTGGACGACAACTGACGCTGAGGCGCGAAAGCGTG  
GGGAG

>ASV:227:Family:Muribaculaceae  
TACGGAGGATGCGAGCGTTATCCGGAATTTATTGGGTTAAAGGGAGCGCAGGCTGTCAGGCAAGTCAGCGGTCAAATGTC  
GGGGCTCAACCCCGGCTGCCGTTGAAACTGCCGGACTAGAGTTCGAGTGAAGTATGCGGAATGCGTTGTGTAGCGGTGA  
AATGCATAGATATGACGCGAACTCCGATTGCGAAGGCGAGCATACTAACTCGCGACTGACGCTGAGGCTCGAAAGCGTGG  
GTATC

>ASV:228:Species:fastidiosa  
TACGTAGGTGGCAAGCGTTATCCGGAATTTATTGGGCGTAAAGGGTGCCTAGGCGGCGAGATAAGTCTGAGGTAAAAGCCC  
GTGGCTCAACCCAGGTAAGCCTTGAAACTGTCTGGCTGGAGTGCAGGAGAGGACAATGGAATTCATGTGTAGCGGTAA  
AATGCGTAGATATTAGGAGGAACACCAGTGGCGAAGGCGGTTGTCTGGCCTGTAAGTACGCTGAAGCACGAAAGCGTGG  
GGAGC

>ASV:229:Species:virosa  
TACGGGGATGCGAGCGTTATCCGGAATTTATTGGGTTAAAGGGCGCGTAGGCGGGACGGAAGTCAGCGGTAAAAGACT  
GCAGCTAAACTGTAGCACCGCTTGAAACTGTTGACTCGAGACGAGACGAGGGAGGCGGAACAAGTGAAGTAGCGGTGA  
AATGCATAGATATCACTTGAACCCCGATAGCGAAGGCGAGCTTCCAGGCTCGTTCTGACGCTGATGCGCGAGAGCGTGG  
GTAGC

>ASV:230:Genus:Blautia  
TACGTAGGGGGCAAGCGTTATCCGGATTTACTGGGTGTAAAGGGAGCGTAGACGGATTAGCAAGTCTGATGTGAAAGGCA  
GGGGCTCAACCCCTGGACTGCATTGAAACTGCCAGTCTTAGAGTGCCGGAGAGGTAAGCGGAATTCCTAGTGTAGCGGTG

AAATGCGTAGATATTAGGAGGAACACCAGTGGCGAAGGCGGCTTACTGGACGGCAACTGACGTTGAGGCTCGAAAGCGTG  
GGGAG  
>ASV:231:Genus:Alistipes  
TACGGAGGATTCAAGCGTTATCCGGATTTATTGGGTTTAAAGGGTGCCTAGGCGGTTTGATAAGTTAGAGGTGAAATACC  
GGTGCTTAACACCGGAACTGCCTCTAATACTGTTGAACTAGAGAGTAGTTGCGGTAGCGGAATGTATGGTGTAGCGGTG  
AAATGCTTAGAGATCATACAGAACACCGATTGCGAAGGCAGCTTACCAAATATATCTGACGTTGAGGCACGAAAGCGTG  
GGGAG  
>ASV:232:Species:filiformis  
TACGTAGGTGGCGAGCGTTATCCGGAATTATTGGGCGTAAAGGGTGCAGGCGGTTTGTTAAGTTTAAAGGTGAAAGCGT  
GGGGCTTAACCCCATATAGCCTTAGAAACTGACAGACTAGAGTACAGGAGAGGGCAATGGAATTCATGTGTAGCGGTAA  
AATGCGTAGATATATGGAGGAACACCAGTGGCGAAGGCGGTTGCCTGCCTGTAAGTACGCTCATGCACGAAAGCGTG  
GGAGC  
>ASV:233:Family:Lachnospiraceae  
TACGTATGGTGCAAGCGTTATCCGGATTTACTGGGTGTAAGGGAGCGTAGACGGAGAGGCAAGTCTGATGTGAAAACCC  
GGGGCTCAACCCGGGACTGCATTGAAAAGTGTCTTCTAGAGTGTGCGAGAGGTAAGTGAATTCCTAGTGTAGCGGTG  
AAATGCGTAGATATTAGGAGGAACACCAGTGGCGAAGGCGGCTTACTGGACGATGACTGACGTTGAGGCTCGAAAGCGTG  
GGGAG  
>ASV:234:Genus:Megamonas  
TACGTAGGCGGCAAGCGTTGTCCGGAATTATTGGGCGTAAAGGGAGCGCAGGCGGAAATTAAGCGGATCTTAAAAGTGC  
GGGGCTCAACCCCGTGTAGGGTCCGAACTGGTTTTCTTGTAGTGCAGGAGAGGAAAGCGGAATTCCTAGTGTAGCGGTGA  
AATGCGTAGATATTGGGAAGAACACCAGTGGCGAAGGCGGTTTTCTGGACTGTAAGTACGCTGAGGCTCGAAAGCTAGG  
GTAGC  
>ASV:235:Order:Mollicutes\_RF39  
TACGTAGGGGGCGAGCGTTATCCGGATTTATTGGGCGTAAAGCGTGTGTAGGCGGTTTATTAAGTTTAAAGTTAAAGCCC  
GGGGCTCAACTCCGGTAAGTCTTAAAAACTGGTAGACTTGTAGTACGGTAGAGGCAAACCGGAATTCCTAGTGTAGCGGTGA  
AATGCGTAGATATTAGAAGGAACACCAGTGGCGAAGGCGGTTTTGCTGGGCCCTTACTGACGCTGAGGCACGAAAGCGTG  
GGAGC  
>ASV:236:Species:callidus  
TACGTAGGGAGCGAGCGTTGTCCGGAATTACTGGGTGTAAGGGAGCGTAGGCGGGATGGCAAGTCAAGTGTGAAAACCTA  
TGGGGCTCAACCCATAGACTGCATTTGAAACTGTTGTTCTTGTAGTGTAGGTAAGCGGAATTCCTGGTGTAGCGGTG  
AAATGCGTAGAGATCAGGAGGAACATCGTGGCGAAGGCGGCTTACTGGGCTTACTGACGCTGAGGCTCGAAAGCGTG  
GGGAG  
>ASV:237:Genus:CAG-352  
TACGTAGGGAGCGAGCGTTGTCCGATTTACTGGGTGTAAGGGTGCCTAGGCGGCCGAGCAAGTCAAGTGTGAAAACCTA  
TGGGGCTTAACCCATAACGTGCATTTGAAACTGTCCGGCTTGTAGTGAAGTAGAGGTAGGCGGAATTCCTGGTGTAGCGGTG  
AAATGCGTAGAGATCGGGAGGAACACCAGTGGCGAAGGCGGCTTACTGGGCTTAACTGACGCTGAGGCACGAAAGCATG  
GGTAG  
>ASV:238:Genus:UC5-1-2E3  
TACGTAGGGGGCAAGCGTTATCCGGATTTACTGGGTGTAAGGGAGCGTAGACGGCACAGCAAGTCTGAAGTGAATCCC  
CGGGCTCAACCCGGGAACTGCTTTGAAACTGTTGGGCTGGAGTGTGGAGAGGCAAGCGGAATTCCTAGTGTAGCGGTG  
AAATGCGTAGATATTAGGAGGAACACCAGTGGCGAAGGCGGCTTGTGGACGTAAGTCAAGTGTGAGGCTCGAAAGCGTG  
GGGAG  
>ASV:239:Genus:Ruminococcaceae\_NK4A214\_group  
TACGTAGGTGGCGAGCGTTATCCGGATTTACTGGGTGTAAGGGGCGCTAGGCGGGAATGCAAGTCAAGTGTGAAATCCA  
GGGGCTTAACCCCTTGAAGTGCATTTGAAACTGATTTCTTGTAGTGTGCGAGAGGTTGACGGAATTCCTAGTGTAGCGGTG  
AAATGCGTAGATATTAGGAGGAACACCAGTGGCGAAGGCGGTTCAACTGGACGATAACTGACGCTGAGGCACGAAAGCGTG  
GGGAG  
>ASV:240:Genus:Lachnospiraceae\_UCG-010  
TACGTAGGGGGCAAGCGTTATCCGGAATTACTGGGTGTAAGGGTGTAGTAGGCGCATGGCAAGTAAGTGTGAAAGCCC  
GAGGCTTAACCTCGGGATTGCATTTTAAACTGCTAAGCTAGAGTACAGGAGAGGAAAGCGGAATTCCTAGTGTAGCGGTG  
AAATGCGTAGATATTAGGAAGAACACCAGTGGCGAAGGCGGCTTCTGGACTGGAAGTCAAGTGTGAGGCTCGAAAGCGTG  
GGGGA  
>ASV:241:Species:butyriciproducens  
TACGTAGGTGGCAAGCGTTATCCGGATTTACTGGGTGTAAGGGGCGTGTAGGCGGGAGTGAAGTCAAGTGTGAAAACCTA  
TGGGGCTCAACCCATAGCCTGCATTTGAAACTGACTTCTTGTAGTGTGAGAGGCGAGGCGGAATTCCTGTGTAGCGGTG  
AAATGCGTAGATATTAGGAGGAACACCAGTGGCGAAGGCGGCTGCTGGACATTAAGTCAAGTGTGAGGCTCGAAAGCGTG  
GGGAG  
>ASV:242:Species:effluvii/hathewayi  
TACGTAGGGGGCAAGCGTTATCCGGATTTACTGGGTGTAAGGGAGCGTAGACGGTTAAGCAAGTCTGAAGTGAAGGCC  
GGGGCTCAACCCCGTACTGCTTTGAAACTGTTGACTTGTAGTGCAGGAGAGGTAAGTGAATTCCTAGTGTAGCGGTG  
AAATGCGTAGATATTAGGAGGAACACCAGTGGCGAAGGCGGCTTACTGGACTGTAAGTCAAGTGTGAGGCTCGAAAGCGTG  
GGGAG  
>ASV:243:Genus:Lachnospiraceae\_ND3007\_group  
TACGTATGGTGCAAGCGTTATCCGGATTTACTGGGTGTAAGGGAGCGTAGGTGGCAAGGCAAGCCAGAAGTGAAGCC  
GGGGCTCAACCCCGGATTGCTTTTGGAACTGTATGCTAGAGTGCAGGAGGGGTGAGCGGAATTCCTAGTGTAGCGGTG  
AAATGCGTAGATATTAGGAGGAACACCAGGAGGCGAAGGCGGCTCACTGGACTGTAAGTCAAGTGTGAGGCTCGAAAGCGTG  
GGGAG  
>ASV:244:Genus:Prevotella\_9

TACGGAAGGTCCGGGCTTATCCGGATTTATTGGGTTAAAGGGAGCGTAGGCCGGAGATTAAGCGTGTGTGAAATGTA  
GATGCTCAACATCTGCACTGCAGCGCAACTGGTTTCCTTGAGTACGCATAAAGTGGGCGGAATTCGTGGTGTAGCGGTG  
AAATGCTTAGATATCACGAAGAACCAGTTCGGAAGGCAGCTCACTGGGGCGCAACTGACGCTGAAGCTCGAAAGCGCG  
GGTAT

>ASV:245:Family:Lachnospiraceae

TACGTATGGAGCAAGCGTTATCCGGATTTACTGGGTGTAAGGGTGCCTAGGTGGCAGTGCAAGTCAGATGTGAAAGGCC  
GGGGCTCAACCCCGGAGCTGCATTTGAAACTGCATAGCTGGAGTACAGGAGAGGCAGGCCGAATTCCTAGTGTAGCGGTG  
AAATGCGTAGATATTAGGAGGAACACCAGTGGCGAAGGCGGCTGCTGGACTGTTACTGACACTGAGGCACGAAAGCGTG  
GGGAG

>ASV:246:Species:catus

TACGTAGGGGGCAAGCGTTATCCGGATTTACTGGGTGTAAGGGAGCGTAGGCCGGGAGCAAGTCAGAAGTAAAAGCCC  
GGGGCTCAACCCCGGAGCGCTTTTGAAGTCCCTGCTTGAATTCAGGAGAGGTAAGCGGAATTCCTAGTGTAGCGGTG  
AAATGCGTAGATATTAGGAGGAACACCAGTGGCGAAGGCGGCTTACTGGACTGACAATGACGCTGAGGCTCGAAAGCGTG  
GGGAG

>ASV:247:Genus:Ruminiclostridium\_5

TACGTAGGGAGCAAGCGTTGTCCGGATTTACTGGGTGTAAGGGTGCCTAGGCCGTTTGGTAAGTCAGAAGTAAAATCCA  
TGGGCTTAACCCATGAAGTGCATTTGAAACTATCGAAGTTCAGTGAAGTAGAGGTAGGCCGAATTCCTAGTGTAGCGGTG  
AAATGCGTAGATATTAGGAGGAACACCAGTGGCGAAGGCGGCTTACTGGGCTTAACTGACGCTGAGGCACGAAAGCATG  
GGTAG

>ASV:248:Family:Coriobacteriales\_Incertae\_Sedis

TACGTATGGAGCAAGCGTTATCCGGATTTATTGGGCGTAAAGCGCGCTAGGCCGGCTTGTAAAGCAAGGTCTTAAATCTT  
GGGGCTCAACCTCAAGCCGGATCTTGAAGTGGCAGGCTCGAGTATGGTAGAGGAAAGTGAATTCCTAGTGTAGCGGTG  
AATGCGCAGATATTGGGAAGAACCAGTGGCGAAGGCGGCTTCTGGGCCATTACTGACGCTGAGGTGCGAAAGCTAGG  
GGAGC

>ASV:249:Genus:Faecalitalea

TACGTAGGTGGCAAGCGTTATCCGGAATGATTGGGCGTAAAGGGTGCCTAGGTGGTACATTAAGTCTGAAGTAAAAGGCA  
GCAGCTCAACTGCTGTTGCTTTGAAACTGGTGAAGTAGAGTGCAGGAGAGGGCGATGGAATTCATGTGTAGCGGTAA  
AATGCGTAGATATTAGGAGGAACACCAGTGGCGAAGGCGGCTGCCTGGCCTGTAAGTACACTGAGGCACGAAAGCGTGG  
GGAGC

>ASV:250:Genus:Ruminococcaceae\_UCG-002

TACGTAGGTGGCAAGCGTTGTCCGGATTTACTGGGTGTAAGGGCGGTAGCCGGGAGGGCAAGTCAGATGTGAAATCCA  
CGGGCTTAACCTCGTGAAGTGCATTTGAAACTACTCTCTTGAGTATCGGAGAGGCAATCGGAATTCCTAGTGTAGCGGTG  
AAATGCGTAGATATTAGGAGGAACACCAGTGGCGAAGGCGGATTGCTGGACGACAATGACGCTGAGGCAGGCGAAAGCGTG  
GGGAG

>ASV:251:Genus:Ruminococcaceae\_NK4A214\_group

TACGTAGGTGGCAAGCGTTGTCCGGATTTACTGGGTGTAAGGGCGCGTAGGCCGGAGAGACAAGTCAGATGTGAAATCTA  
TGGGCTTAACCCATAAACTGCAATTTGAAACTACTCTCTTGAGTATCGGAGAGGCAATCGGAATTCCTAGTGTAGCGGTG  
AAATGCGTAGATATTAGGAGGAACACCAGTGGCGAAGGCGGCTTCTGGACTTAACTGACGCTGAGGCAGGCGAAAGCGTG  
GGGAG

>ASV:252:Genus:Christensenellaceae\_R-7\_group

TACGTAGGGGGCGAGCGTTGTCCGGAATGATTGGGCGTAAAGGGCGCGTAGGCCGGCTGCTAAGTCTGAAGTAAAAGTCC  
TGCTTTCAAGGTGGGAAGTGTGCGGATTTGGATACTGGTGGGCTGGAGTGCAGGAGAGGAAAGCGGAATTCCTAGTGTAGCGGTG  
AAATGCGTAGATATTAGGAGGAACACCAGTGGCGAAGGCGGCTTCTGGACTGAAACTGACGCTGAGGCAGGCGAAAGCGTG  
GGGAG

>ASV:253:Genus:Barnesiella

TACGGAGGATGCAAGCGTTATCCGGATTTATTGGGTTAAAGGGTGCCTAGGCCGACGCCAAGTCAGCGGTGAAATTTT  
CGGGCTCAACCCCGGAGTGTGCGGATTTGAAACTGGCAGCTAGAGTGCACAAGAGGCAGGCCGAATTCCTAGTGTAGCGGTG  
AAATGCGTAGATATTAGGAGGAACACCAGTGGCGAAGGCGGCTTCTGGACTGAAACTGACGCTGAGGCAGGCGAAAGCGTG  
GGTAT

>ASV:254:Family:Lachnospiraceae

TACGTAGGGGGCAAGCGTTATCCGGATTTACTGGGTGTAAGGGAGCGTAGACGGCAGTGCAAGTCTGAAGTAAAAGCCC  
GGGGCTCAACCCCGGAGCTGCTTTGAAACTGTGCAGCTAGAGTGTGCGAGAGGCAAGCGGAATTCCTAGTGTAGCGGTG  
AAATGCGTAGATATTAGGAGGAACACCAGTGGCGAAGGCGGCTTCTGGACTGACGCTGAGGCTCGAAAGCGTG  
GGGAG

>ASV:255:Species:parvula/rogosae/tobetsuensis

TACGTAGGTGGCAAGCGTTGTCCGGAATTTATTGGGCGTAAAGCGCGCAGGCCGATCAGTCACTGTCTTAAAAGTTT  
GGGGCTTAACCCCGTGGATGGGATGGAAGTGCATCTAGAGTATCGGAGAGGAAAGTGAATTCCTAGTGTAGCGGTG  
AATGCGTAGATATTAGGAGGAACACCAGTGGCGAAGGCGGCTTCTGGACTGAAACTGACGCTGAGGCAGGCGAAAGCCAGG  
GGAGC

>ASV:256:Genus:Prevotella\_9

TACGGAAGGTCCGGGCTTATCCGGATTTATTGGGTTAAAGGGAGCGTAGGCCGGAGATTAAGCGTGTGTGAAATGTA  
GACGCTCAACGCTGCACTGCAGCGCAACTGGTTTCCTTGAGTACGCATAAAGTGGGCGGAATTCGTGGTGTAGCGGTG  
AAATGCTTAGATATCACGAAGAACCAGTTCGGAAGGCAGCTCACTGGGGCGCAACTGACGCTGAAGCTCGAAAGCGCG  
GGTAT

>ASV:257:Family:Muribaculaceae

TACGGAGGATGCGAGCGTTATCCGGATTTATTGGGTTAAAGGGTGCCTAGGCCGGCGGTGCAAGTCAGCGGTAAAAGCCC  
GGGGCTCAACCCCGGAGCGGTTGAAACTGCAGTGCATAGAGAAGGCGAGAGGTACGCGGAATGCGCAGTGTAGCGGTGA  
AATGCTTAGATATTGCGCAGAACCAGTTCGGAAGGCGGCTACTGGGCGCTGACTGACGCTGAGGCACGAAAGCGGTG

GGATC

>ASV:258:Species:johnsonii

TACGGAGGATCCGAGCGTTATCCGGATTTATTGGGTTTAAAGGGTGCCTAGGTGGTAATTTAAGTCAGCGGTGAAAAGTTT  
GTGGCTCAACCATAAAATTGCCGTTGAAACTGGGTTACTTGAGTGTGTTTGGAGTAGCGGAATGCGTGGTGTAGCGGTG  
AAATGCATAGATATCACGCAGAACTCCAATTGCGAAGGCAGCTTACTAAACCATAACTGACACTGAAGCACGAAAGCGTG  
GGTAT

>ASV:259:Genus:Lachnoclostridium

TACGTAGGGGCAAGCGTTATCCGGATTTACTGGGTGTAAGGGGAGCGTAGACGGCTTAGCAAGTCTGAAGTGAAGGCC  
GGGGCTCAACCCCGGACTGCTTTGAAACTGTTAAGCTGGAGTGTGGAGAGGTAAGCGGAATTCCTAGTGTAGCGGTG  
AAATGCGTAGATATTAGGAGGAACACCAGTGGCGAAGGCGCTTACTGGACAGTAAGTACGCTTGAGGCTCGAAAGCGTG  
GGGAG

>ASV:260:Genus:Prevotella\_9

TACGGAAGGTTCCGGCGTTATCCGGATTTATTGGGTTTAAAGGGAGCGTAGGCGGAGATTAAGCGTGTGTGAAATGTA  
GACGCTCAACGCTGCACTGCAGCGCAACTGGTTTCTTGAGTACGCACAAAGTGGCGGAATTCGTGGTGTAGCGGTG  
AAATGCTTAGATATCACGAAGAACCAGTGGCGAAGGCAGCTCACTGGAGCGCAACTGACGCTGAAGCTCGAAAGTGGC  
GGTAT

>ASV:261:Genus:Ruminococcaceae\_UCG-014

TACGTAGGGTCCAAGCGTTATCCGGATTTACTGGGTGTAAGGGGAGCGTAGACGGCGTGAAGTACGCTGTGAAAAGTT  
AGGGCTCAACCTTAAGCCTGCAGCTGAAACTGTAGTGTAGAGTGCAGGAGAGGTAAGCGGAATTCCTAGTGTAGCGGTG  
AAATGCGTAGATATTAGGAGGAACACCAGTGGCGAAGGCGCTTACTGGACTGTAAGTACGCTTGAGGCGCAAAAGTGTG  
GGGAG

>ASV:262:Species:histaminiformans

TACGTAGGTGGCAAGCGTTATCCGGATTTACTGGGCGTAAAGCGCGCAGGCGGCCGTGCAAGTCCATCTTAAAGCGT  
GGGGCTTAACCCATGAGGGGATGAAACTGCAGGGCTGGAGTGTGGAGGGGAAAGTGGAAATTCCTAGTGTAGCGGTG  
AATGCGTAGAGATTAGGAAGAACCAGTGGCGAAGGCGACTTCTAGACGCAACTGACGCTGAGGCGCAAAAGCGTGG  
GGAGC

>ASV:263:Genus:Paraprevotella

TACGGAAGATGCGAGCGTTATCCGGATTTATTGGGTTTAAAGGGAGCGTAGGCGGGCTTTAAGTACGCGGTCAAATGTC  
ACGGCTCAACCGTGGCCAGCCGTTGAAACTGCAAGCCTTGAGTGTGCACAGGGCACATGGAATTCGTGGTGTAGCGGTG  
AATGCTTAGATATCACGAAGAACCAGTCCGATCGGAAGGCATTGTGCCGGGCATAACTGACGCTGAGGCTCGAAAGTGGC  
GTATC

>ASV:264:Species:defluvii/temperans

TACGTAGGGTGGCAAGCGTTAATCCGGAATTAAGCGTAAAGCGTGCAGGCGGTTATATAAGACAGATGTGAAATCCC  
CGGGCTCAACCTGGGAAGTGCATTTGTGACTGTATAGCTAGAGTACGGCAGAGGGGATGGAATTCGCGTGTAGCAGTG  
AAATGCGTAGATATGCGGAGGAACACCAGTGGCGAAGGCATCCCTGGGCTGTACTGACGCTCATGCACGAAAGCGTG  
GGGAG

>ASV:265:Genus:Barnesiella

TACGGAGGATGCGAGCGTTATCCGGATTTATTGGGTTTAAAGGGTGCCTAGGCGGCACGCCAAGTACGCGGTGAAATTC  
CGGGCTCAACCCGGAATGTGCCGTTGAAACTGGCGAGCTAGAGTGCACAAGAGGCAGGCGGAATGCGTGGTGTAGCGGTG  
AAATGCATAGATATCACGCAGAACCAGTTCGGAAGGCAGCTGCTAGGGTGCACAGACGCTGAGGCACGAAAGCGTG  
GGTAT

>ASV:266:Genus:Ruminiclostridium\_5

TACGTAGGGAGCGAGCGTTATCCGGATTTACTGGGTGTAAGGGTGCCTAGGCGGATTGGCAAGTACAGAAGTGAATCCA  
TGGGCTTAACCCATGAACTGCTTTTGAAGTGTAGTCTTGAGTGAAGTAGAGGTAGGCGGAATTCGCGTGTAGCGGTG  
AAATGCGTAGAGATCGGGAGGAACACCAGTGGCGAAGGCGGCTACTGGGCTTAACTGACGCTGAGGCACGAAAGTGTG  
GGTAG

>ASV:267:Species:gracilis

TACGGAGGGTGAAGCGTTACTCGGAATCACTGGGCGTAAAGGAGCGCTAGGCGGATTATCAAGTCTCTTGTAAGTCTA  
ACGGCTCAACCGTTAAACTGCTTTGAAACTGATAATCTAGAGTAAGGGAGAGGCAGATGGAATTCCTGGTGTAGGGGTA  
AAATCCGTAGATATCAAGAAGAATACCTATTGCGAAGGCAGTCTGCTGGAACCTAACTGACGCTAATGCGTGAAGCGTG  
GGGAG

>ASV:268:Genus:Lachnospira

TACGTATGGAGCAAGCGTTATCCGGATTTACTGGGTGTAAGGGGAGTGTAGGTGGCCATGCAAGTACAGAAGTGAATCC  
GGGGCTCAACCCCGGAAGTGCATTTGAAACTGTGAGGCTGGAGTGCAGGAGGGGTGAGTGGAAATTCCTAGTGTAGCGGTG  
AAATGCGTAGATATTAGGAGGAACACCAGTGGCGAAGGCGGCTCACTGGACTGTAAGTACACTGAGGCTCGAAAGCGTG  
GGGAG

>ASV:269:Species:virosa

TACGGGGGATGCGAGCGTTATCCGGATTTATTGGGTTTAAAGGGCGCGTAGGCGGGACGTCAAGTACGCGGTAAAAGACT  
GCAGTAAACTGTAGCACCGGTTGAAACTGGCGCCCTGGAGACGAGACGAGGGAGGCGGAACAAGTGAAGTAGCGGTGA  
AATGCATAGATATCACTTGAACCCGATAGCGAAGGCAGCTTCCAGGCTCGTTCTGACGCTGATGCGCGAGAGCGGTG  
GTAGC

>ASV:270:Genus:Bacteroides

TACGGAGGATCCGAGCGTTATCCGGATTTATTGGGTTTAAAGGGAGCGTAGATGGATGTTAAGTCAAGTGTGAAAAGTTT  
GCGGCTCAACCGTAAATGCAAGTGTACTGGATGTCTTGAGTGCAGTTGAGGCAGTGGAAATTCGTGGTGTAGCGGTG  
AAATGCTTAGATATCACGAAGAACCAGTTCGGAAGGCAGCTGCTAAGCTGCAACTGACATTGAGGCTCGAAAGTGTG  
GGTAT

>ASV:271:Genus:Ruminococcus\_2

TACGTAGGGAGCAAGCGTTATCCGGATTTACTGGGTGTAAGGGTGCCTAGGCGCAATGCAAGTACAGATGTGAAATCTA

TGGGCTCAACCATAAACTGCATTTGAAACTGCGTTGCTTGAAGTGAAGTAGAGGCAGGCGGAATTCCTCGTGTAGCGGTG  
AAATGCGTAGAGATGGGAGGAACACCAGTGGCGAAGGCGGCTGCTGGGCTTAACTGACGCTGAGGCACGAAAGCGTG  
GGTAG  
>ASV:272:Genus:Paraprevotella  
TACGGAAGATGCGAGCGTTATCCGGATTTATTGGGTTAAAGGGAGCGTAGGCGGGCTTTAAGTCAGCGGTCAAATGCC  
ACGGCTCAACCGTGGCCAGCGTTGAAACTGTAAAGCCTTGAAGTCTGCACAGGGCACATGGAATTCGTGGTGTAGCGGTGA  
AATGCTTAGATATCACGAAGAACTCCGATCGCGAAGGCATTGTGCCGGGCAGCACTGACGCTGAGGCTCGAAAGTGGCG  
GTATC  
>ASV:273:Family:Muribaculaceae  
TACGAGGATGCGAGCGTTATCCGGATTTATTGGGTTAAAGGGTGCCTAGGCGGCCGTCAGTCAGCGGTAAAATTC  
GGGGCTCAACCCGTCAGCGTTGAAACTGTAGGGCTCGAGTGGGCAGAAAGTGCAGCGAATGCGTGGTGTAGCGGTGA  
AATGCATAGATATCACGAGAACCCTGATTGCGAAGGCAGCGCACCGGCGCCAACTGACGCTGAGGCACGAAAGTGGCG  
GGATC  
>ASV:274:Genus:Oscillibacter  
TACGTAGGTGGCAAGCGTTGTCGGATTTACTGGGTGTAAGGGGCGTGACGCGGGCTGGCAAGTCAGGCGTAAAATCCC  
AGGGCTCAACCCGTAAGTGGCTTTGAAACTGCTGGTCTTGAAGTACCGGAGAGGTGATCGGAATTCCTTGTGTAGCGGTG  
AAATGCGTAGATATAAGGAAGAACACCAGTGGCGAAGGCGGATGACTGGACGGCAACTGACGCTGAGGCGCGAAAGCGTG  
GGGAG  
>ASV:275:Species:intestinalis/stercoris  
TACGTAGGGGCGAGCGTTATCCGGATTCATTGGGCTAAAGCGCGCTAGGCGGCCGGCAGGCGAGGGGGTCAAATGGC  
GGGGCTCAACCCGTCAGCGCCCTGAAACCGCCGGGCTCGGTGTCGGTAGGGGAGGGTGAACACCCGCTGTAGCGGTGG  
AATGCGCAGATATCGGGTGAACACCCTGGCGAAGGCGGCCCTCTGGGCGAGACCGTACGCTGAGGCGCGAAAGTGGG  
GGAGC  
>ASV:276:Genus:Ruminiclostridium\_6  
TACGTAGGTGGCGAGCGTTGTCGGAACTTACTGGGTGTAAGGGAGGTGAGGCGGGAAGGCAAGTCAGAAGTAAAATTA  
TGGGCTTAAACCATAAACCCTGCTTTTGAACCTGTTTTCTTGAAGTGAAGCAGAGGCAAGCGGAATTCCTAGTGTAGCGGTG  
AAATGCGTAGATATTAGGAGGAACACCAGTGGCGAAGGCGGCTTCTGGGCTTTACTGACGCTGAGGCTCGAAAGCGTG  
GGGAG  
>ASV:277:Order:Rhodospirillales  
TACGAAGGGGGCAAGCGTTGTCGGAACTTACTGGGCTAAAGGGAGGTGAGGCGGTTATGTAAGATAGTGGTAAAATCCC  
AGAGCTTAACTTTGGAATTGCCATTATGACTATGTGGCTAGAATTACAGAGAGGATAGTGAATACCCAGTGTAGAGGTG  
AAATTCGTAGATATTGGGTAGAACCACCAGTGGCGAAGGCGACTATCTGGCTGTATATTGACGCTGAGGCTCGAAAGCATG  
GGGAT  
>ASV:278:Family:Ruminococcaceae  
TACGTAGGTGGCAAGCGTTGTCGGAACTTACTGGGTGTAAGGGAGCGTAGGCGGGATGCCAAGTCAGCTGTAAAACCTA  
TGGGCTTAACTTGTAGACTGCAAGTGAACCTGTTCTTGAAGTGAAGTAGAGGTTGGCGGAATTCAGAGTGTAGCGGTG  
AAATGCGTAGATATTGAGGGAACACCAGTGGCGAAGGCGGCCAACTGGGCTTTAACTGACGCTGAGGCTCGAAAGTGTG  
GGGAG  
>ASV:279:Family:Prevotellaceae  
TACGGAAGGTCCAGGCGTTATCCGGATTTATTGGGTTAAAGGGAGCGTAGGCGGCCCTTAAGCGTGTGTGAAATGCC  
GCGGCTCAACCGTGGCACTGCAAGCGGAACTGGGGGGCTTGAAGTGCACGCAACGAGGCGGAATTCGTGGTGTAGCGGTG  
AAATGCTTAGATATCACGAAGAACTCCGATTGCGAAGGCAGCTTGCGGGAGTGCAGCTGACGCTGAAGCTCGAAGGTGGC  
GGTAT  
>ASV:280:Genus:Lachnospiraceae\_NK4A136\_group  
TACGTAGGGGGCAAGCGTTATCCGGATTTACTGGGTGTAAGGGAGCGTAGACGGCGACGCAAGTCTGGAGTAAAAGCCC  
GGGGCCCAACCCGGGACTGCTTTGAAACTGTGCTGCTGGAGTGCAGGAGAGGTAAGTGAATTCCTAGTGTAGCGGTG  
AAATGCGTAGATATTAGGAGGAACACCAGTGGCGAAGGCGGCTTACTGGACTGTAACGACTGACGCTGAGGCTCGAAAGCGTG  
GGGAG  
>ASV:281:Family:Lachnospiraceae  
TACGTAGGGGGCAAGCGTTATCCGGATTTACTGGGTGTAAGGGAGCGTAGACGGTCAAGCAAGTCAGAAGTAAAAGGCT  
GGGGCTCAACCCGGGACTGCTTTTGAACCTGTTGACTGGAGTGTGGAGAGGTAAGCGGAATTCCTAGTGTAGCGGTG  
AAATGCGTAGATATTAGGAGGAACACCAGTGGCGAAGGCGGCTTACTGGACAGTAACGACTGACGCTGAGGCTCGAAAGCGTG  
GGGAG  
>ASV:282:Species:indistinctus  
TACGAGGACCCGAGCGTTATCCGGATTTATTGGGTTAAAGGGTGCCTAGGCGGATTAGTAAGTTAGAGGTAAAAGCTC  
GATGCTCAACATCGAAATTCCTGATACTGTTAGTCTAGAGTATAGTTGCGGAAGGCGGAATGTGTGGTGTAGCGGTG  
AAATGCTTAGATATCACAGAAACACCAGTGGCGAAGGCGAGCTTCCAAAGCTATTACTGACGCTGATGACGAAAGCGTG  
GGGAG  
>ASV:283:Species:eutactus  
TACGTATGGTGAAGCGTTATCCGGATTTACTGGGTGTAAGGGTGCCTAGGTTGGCAAGGCAAGTCTGAAGTAAAATCC  
GGGGCTCAACCCGGAAGTGTGTTGAAACTGTTAGCTAGAGTACAGGAGAGGTAAGTGAATTCCTAGTGTAGCGGTG  
AAATGCGTAGATATTAGGAGGAACACCAGTGGCGAAGGCGACTTACTGGACTGCTACTGACACTGAGGCACGAAAGCGTG  
GGGAG  
>ASV:284:Genus:Lachnoclostridium  
TACGTAGGGGGCAAGCGTTATCCGGATTTACTGGGTGTAAGGGAGCGTAGACGGGATAGCAAGTCTGAAGTAAAAGCCC  
GGGGCTCAACCCGGGACTGCTTTGAAACTGTTGACTGGAGTGTGGAGAGGCAAGTGAATTCCTAGTGTAGCGGTG  
AAATGCGTAGATATTAGGAGGAACACCAGTGGCGAAGGCGGCTTCTGGACAGTACTGACGCTGAGGCTCGAAAGCGTG  
GGGAG

>ASV:285:Family:Lachnospiraceae  
TACGTAGGGGGCAAGCGTTATCCGGATTTACTGGGTGTAAAGGGAGCGTAGGCGGCCATGCAAGTCAGAAGTGAAAGCCC  
GGGGCTCAACCCGGGACTGCTTTTAAACTGTAAGGCTAGATTGCCGGAGAGGTAAAGCGGAATTCCTAGTGTAGCGGTG  
AAATGCGTAGATATTAGGAGGAACACCAGTGGCGAAGGCGGCTTACTGGACGGTGAATGACGCTGAGGCTCGAAAGCGTG  
GGGAG

>ASV:286:Genus:Alloprevotella  
TACGGAAGGTCCAGGCGTTATCCGGATTTATTGGGTTTAAAGGGAGCGCAGGCGGACCTTTAAGTCAGCTGTGAAATACG  
CGGGCTCAACCGTGCAGTTGATCTGGAGGCTTTGAGTGCACACAGGGATACTGGAATTCATGGTGTAGCGGTG  
AAATGCTCAGATATCATGAAGAACTCCAATCGCAAGGACAGGTATCCGGGGTCAACTGACGCTGAGGCTCGAAAGTGCG  
GGTAT

>ASV:287:Genus:Citrobacter  
TACGGAGGGTCAAGCGTTAATCCGGAATTACTGGGCGTAAAGCGCACGAGGCGGTCTGTCAAGTCGGATGTGAAATCCC  
CGGGCTCAACCTGGGAACTGCATCCGAAACTGGCAGGCTAGAGTCTTGTAGAGGGGGGTAGAATTCAGGTGTAGCGGTG  
AAATGCGTAGATCTGGAGGAATACCGGTGGCGAAGGCGGCCCTGGACAAGACTGACGCTCAGGTGCGAAAGCGTG  
GGGAG

>ASV:288:Genus:Fournierella  
AACGTAGGTGGCAAGCGTTGTCCGGAATTACTGGGTGTAAAGGGAGCGCAGGCGGGAGAGCAAGTTGGAAGTGAATCTG  
TGGGCTCAACTCAAAATTGCTTTCAAACCTGTTTTCTTGGTGTAGAGGTAGCGGAATTCAGGTGTAGCGGTG  
GAATGCGTAGATATCGGAGGAACACCAGTGGCGAAGGCGGCTACTGGGCACTAACTGACGCTGAGGCTCGAAAGCATG  
GGTAG

>ASV:289:Genus:Lachnospiraceae\_UCG-004  
TACGTAGGGGGCAAGCGTTATCCGGATTTACTGGGTGTAAAGGGAGCGTAGACGGCGATGCAAGTCTGAAGTGAATACCC  
CGGGCTCAACCTGGGAACTGCATTTGAAACTGTATGGCTAGAGTCTGGAGAGGTAAAGCGGAATTCCTAGTGTAGCGGTG  
AAATGCGTAGATATTAGGAAGAACCAGTGGCGAAGGCGGCTTACTGGACAGTAACTGACGTTAGGCTCGAAAGCGTG  
GGGAG

>ASV:290:Genus:Bacteroides  
TACGGAGGATGCGAGCGTTATCCGGATTTATTGGGTTTAAAGGGAGCGCAGACGGGACTTTAAGTCAGCTGTGAAATTTT  
CCGGCTCAACCGGAACTGCATTTGAAACTGTTTCTTGGTGTAGAGTACGGTGCAGGCGAGGCGGAATTCGTGGTGTAGCGGTG  
AAATGCTTAGATATCACGAAGAACCAGTGGCGAAGGCGGCTGCCAGACCGCAACTGACGTTATGCTCGAAAGTGCG  
GGTAT

>ASV:291:Species:massiliensis  
TACGTAGGGGGCAAGCGTTATCCGGATTTACTGGGTGTAAAGGGAGCGTAGACGGCATGACAAGCCAGATGTGAAAACCC  
AGGGCTCAACCTGGGACTGCATTTGAAACTGCCAGGCTGGAGTGCAGGAGAGGTAAAGCGGAATTCCTAGTGTAGCGGTG  
AAATGCGTAGATATTAGGAGGAACACCAGTGGCGAAGGCGGCTTACTGGACTGTAAGTACGCTTGGGCTCGAAAGCGTG  
GGGAG

>ASV:292:Genus:Ruminococcaceae\_UCG-004  
TACGTAGGGAGCGAGCGTTATCCGGATTTACTGGGTGTAAAGGGCGTGTAGGCGGGGAAGCAAGTCAGATGTGAAAACCA  
GTGGCTCAACCACTGGCCTGCATTTGAAACTGTTTTCTTGGTGTAGGAGAGGCGAGGCGGAATTCAGTGTAGCGGTG  
AAATGCGTAGATATACGAGGAACACCAGTGGCGAAGGCGGCTGCTGGACATTAAGTACGCTGAGGCGGAAAGCGTG  
GGGAG

>ASV:293:Species:senegalensis/timonensis  
TACGGAGGATCAAGCGTTATCCGGATTTATTGGGTTTAAAGGGTGCCTAGGCGGTTTATAAGTTAGAGGTGAAATACC  
GGTGCTTAACACCGGAACTGCCTCTAATACTGTTGAGCTAGAGAGTGTGCGGTAGGCGGAATGTATGGTGTAGCGGTG  
AAATGCTTAGAGATCATAACAGAACCCGATTGCGAAGGCGGCTTACCAAATATATCTGACGTTGAGGCGGAAAGCGTG  
GGGAG

>ASV:294:Genus:Family\_XIII\_AD3011\_group  
TACGTAGGGGGCAAGCGTTATCCGGATTTATTGGGCTAAAGAGTACGTAGGTGGTTTTCTAAGCACGGGTTTAAAGGCA  
ATGGCTTAACCATTTGTCGCTTGTGAACTGGAAGACTTGTAGTGCAGGAGAGGAAAGCGGAATTCCTAGTGTAGCGGTGA  
AATGCGTAGATATTAGGAGGAACACCAGTGGCGAAGGCGGCTTCTGGACTGTAAGTACACTGAGGTACGAAAGCGTG  
GGAGC

>ASV:295:Genus:Ruminococcus\_1  
TACGTAGGGAGCGAGCGTTGTCCGGAATTACTGGGTGTAAAGGGAGCGTAGGCGGGATGCAAGTCAGATGTGAAAACCA  
TGGGCTCAACCTGTAGATTGCATTTGAAACTGTTGTTCTTGGTGTAGGAGGTAAGCGGAATTCCTAGTGTAGCGGTG  
AAATGCGTAGATATTAGGAGGAACATCGGTGGCGAAGGCGGCTTACTGGGCTTTACTGACGCTGAGGCTCGAAAGCGTG  
GGGAG

>ASV:296:Genus:Prevotella\_7  
TACGGAAGGTCCGGGCGTTATCCGGATTTATTGGGTTTAAAGGGAGCGTAGGCGGTGAGGTAAGCGTGTGTGAAATGTA  
GGCGCCCAACGCTGCACTGCAGCGCAACTGCCCACTTGTAGTGCAGCGCAACGCCGGCGGAACTCGTCTGTAGCGGTG  
AAATGCTTAGATATGACGAAGAACCAGATTGCGAAGGCGGCTTACTGGGCTTTACTGACGCTGAGGCTCGAAAGCGCG  
GGTAT

>ASV:297:Species:cecorum  
TACGTAGGTGGCAAGCGTTGTCCGGATTTATTGGGCTAAAGCGAGCGCAGGCGGTCTTTAAGTCTGATGTGAAAGCCC  
CCGGCTTAACCGGGAGGGTCAATTGAAACTGGGAGACTTGTAGTGCAGAGAGGAAAGCGGAATTCATGTGTAGCGGTG  
AAATGCGTAGATATATTAGGAGGAACACCAGTGGCGAAGGCGGCTTCTGGTCTGTAAGTACGCTGAGGCTCGAAAGCGTG  
GGGAG

>ASV:298:Genus:Prevotella\_9  
TACGGAAGGTCCGGGCGTTATCCGGATTTATTGGGTTTAAAGGGAGCGTAGGCGGAGATTAAGCGTGTGTGAAATGTA  
GACGCTCAACGCTGCACTGCAGCGCAACTGGTTTCTTGGTGTAGTACGACAAAGTGGGCGGAATTCGTGGTGTAGCGGTG

AAATGCTTAGATATCACGAAGAACTCCGATTGCGAAGGCAGCTCACTGGAACGCAACTGACGCTGAAGCTCGAAAGTGCG  
GGTAT  
>ASV:299:Genus:Subdoligranulum  
AACGTAGGGTGCAAGCGTTGTCCGGAATTACTGGGTGTAAGGGAGCGCAGGCGGACCGCAAGTTGGGAGTGAAATCCA  
TGGGCTCAACCCGTAATTGCTTTCAAAGCTGCTGGCCTTGGAGTAGTCAGAGGTAGGTGGAATTCCTGGTGTAGCGGTG  
GAATGCGTAGATATCGGGAGGAACACCAGTGGCGAAGGCAGCTACTGGGCACCAACTGACGCTGAGGCTCGAAAGCATG  
GGTAG  
>ASV:300:Species:stercoris  
TACGTAGGGGGCAAGCGTTATCCGGATTTACTGGGTGTAAGGGAGCGTAGACGGAAGCAAGTCTGATGTGAAAGGCT  
GGGGCTTAACCCAGGACTGCATTGAAACTGTTTTCTTGGAGTCCGGAGAGGTAAGCGGAATTCCTAGTGTAGCGGTG  
AAATGCGTAGATATTAGGAGGAACACCAGTGGCGAAGGCAGCTACTGGACGTTAAGTACGCTTGGAGCTCGAAAGCGTG  
GGGAG  
>ASV:301:Species:lulae  
TACGTAGGGTGCGAGCGTTATCCGGAATTATTGGGCGTAAAGAGCTCGTAGGCGGTTTGTGCGCTGTCGGTGAAAGTCC  
GGGGCTTAACCCGATCTGCGGTGGGTACGGGCAGACTAGAGTGCAGTAGGGGAGACTGGAATTCCTGGTGTAGCGGTG  
GAATGCGCAGATATCAGGAGGAACACCAGTGGCGAAGGCAGGTCTCTGGGCTGTAAGTACGCTGAGGAGCGAAAGCATG  
GGGAG  
>ASV:302:Family:Ruminococcaceae  
TACGTAGGTGGCAAGCGTTGTCCGGAATTACTGGGTGTAAGGGAGCGCAGGCGGGAAGCAAGTCAAGTGTGAAACTA  
CAGGCTTAACCTGTAGACTGCAGTTGAAACTGTTTTCTTGGAGTGAAGTAGAGTTGGCGGAATTCAGTGTAGCGGTG  
AAATGCGTAGATATTAGGAGGAACACCAGTGGCGAAGGCAGCTACTGGGCTTTAAGTACGCTGAGGCTCGAAAGTGTG  
GGGAG  
>ASV:303:Genus:Dialister  
TACGTAGGTGGCAAGCGTTGTCCGGAATTATTGGGCGTAAAGCGCGCAGGCGGCTTCCCAAGTCCCTTTAAAAGTGC  
GGGGCTTAACCCGATGATGGGAAGGAAACTGGGAAGCTGGAGTATCGGAGAGGAAGGTGGAATTCCTAGTGTAGCGGTG  
AATGCGTAGAGATTAGGAAGAACACCAGTGGCGAAGGCAGCTTTCTGGACGAAAAGTACGCTGAGGCGCGAAAGCGTGG  
GGAGC  
>ASV:304:Genus:Ruminococcus\_1  
TACGTAGGGAGCGAGCGTTGTCCGGAATTACTGGGTGTAAGGGAGCGTAGGCGGGACGGCAAGTCAAGTGTGAAACTA  
TGGGCTCAACTCATAGACTGCATTTGAAACTGTTGTTCTTGGAGTGGAGTAGAGGTAAGCGGAATTCCTGGTGTAGCGGTG  
AAATGCGTAGAGATCAGGAGGAACATCGTGGCGAAGGCAGCTACTGGGCTTTACTGACGCTGAGGCTCGAAAGCGTG  
GGGAG  
>ASV:305:Species:mortiferum  
TACGTATGTCGAAGCGTTATCCGGATTTATTGGGCGTAAAGCGCGTCTAGGCGGTTTGGTAAGTCTGATGTGAAAATGC  
GGGGCTCAACTCCGATTTGCGTTGAAACTGCCAACTAGAGTACTGGAGAGGTGGGCGGAACTACAAGTGTAGAGGTGA  
AATTCGTAGATATTTGTAGGAATGCCGATGGGGAAGCCAGCCACTGGACAGATACTGACGCTAAAGCGCGAAAGCGTGG  
GTAGC  
>ASV:306:Family:Muribaculaceae  
TACGGAGGATGCGAGCGTTATCCGGATTTATTGGGTTAAAGGGTGCCTAGGCGGCCGTCAGTCAAGTCAAGCGTAAATTC  
GGGGCTCAACCCGTCAGCGGTTGAAACTGCCGGGCTCGAGTGGGCGAGAAGTGCAGCGGAATTCGCTGGTGTAGCGGTGA  
AATGCATAGATATCACGAGAACCCCGATTGCGAAGGCAGCGCACCGGCGCCCAACTGACGCTGAGGCGCAAAAGTGCAG  
GGATC  
>ASV:307:Genus:Faecalibacterium  
AACGTAGGTCACGAGCGTTGTCCGGAATTACTGGGTGTAAGGGAGCGCAGGCGGGAAGACAAGTTGGAAGTGAATCTA  
TGGGCTCAACCATAAAGTCTTTCAAAGCTGTTTTCTTGGAGTGTGAGGAGGTAGGCGGAATTCCTGGTGTAGCGGTG  
GAATGCGTAGATATCGGGAGGAACACCAGTGGCGAAGGCAGCTACTGGGCACCAACTGACGCTGAGGCTCGAAAGTGTG  
GGTAG  
>ASV:308:Species:korensis  
TACGAGGGGAGCTAGCGTTGTTCCGGAATTACTGGGCGTAAAGCGCACGTAGGCGGCTTGTAAAGTAAAGGGTGAAAGCCC  
AGAGCTCAACTCTGGAATTGCCTTTAGACTGCATCGCTGAATCCAGGAGAGGTGAGTGGAAATTCAGTGTAGAGGTG  
AAATTCGTAGATATTCGGAAGAACACCAGTGGCGAAGGCAGCTACTGGACTGGTATTGACGCTGAGGTGCGAAAGCGTG  
GGGAG  
>ASV:309:Genus:Lachnoclostridium  
TACGTAGGGGGCAAGCGTTATCCGGATTTACTGGGTGTAAGGGAGCGTAGACGGCGATGCAAGCCAGATGTGAAAGCCC  
GGGGCTCAACCCGGGACTGCATTTGGAAGTGCCTGGCTGGAGTGTGCGAGAGGCAGGCGGAATTCCTAGTGTAGCGGTG  
AAATGCGTAGATATTAGGAGGAACACCAGTGGCGAAGGCAGCTGCTGGACGATGACTGACGCTTGGAGCTCGAAAGCGTG  
GGGAG  
>ASV:310:Species:wadsworthensis  
TACGTAGGGTGCAAGCGTTAATCCGGAATTACTGGGCGTAAAGCGTGCAGGCGGTTCTGTAAGATAGATGTGAAATCCC  
CGGGCTCAACTGGGAATTGCATATGACTGCAGGACTTGGTTTTGTGAGAGGAGGTGGAATTCACGCTGTAGCAGTG  
AAATGCGTAGATATGTGGAAGAACACCAGTGGCGAAGGCAGCTCTGGGACATGACTGACGCTCATGCAGAAAGCGTG  
GGGAG  
>ASV:311:Genus:Alistipes  
TACGGAGGATCCGAGCGTTATCCGGATTTATTGGGTTAAAGGGTGCCTAGGCGGTTTGTAAAGTGTAGAGGTGAAAGCTC  
GATGCTCAACATCGAAATTCCTGATACTGTCAGACTAGAGTGTAGTTGCGGAAGGCAGGAAATGTGTGGTGTAGCGGTG  
AAATGCTTAGATATCACACAGAACACCAGTGGCGAAGGCAGCTTTCCAAGCTATTACTGACGCTGAGGCGCAAAAGCGTG  
GGTAG  
>ASV:312:Genus:Lachnospira

TACGTATGGAGCAAGCGTTATCCGGATTTACTGGGTGTAAGGGAGGTAGGTGGCCATGCAAGTCAGAAGTGAAAATCC  
GGGGCTCAACCCCGAACTGCTTTTAAAAGTGTGAGGCTAGAGTGCAGGAGGGGTGAGTGGAATTCCTAGTGTAGCGGTG  
AAATGCGTAGATATTAGGAGGAACACCAGTGGCGAAGGCGGCTCACTGGACTGTAACGACACTGAGGCTCGAAAGCGTG  
GGGAG

>ASV:313:Species:ruminis

TACGTAGGTGGCAAGCGTTGTCCGGATTTATTGGGCTAAAGGGAACGACGGCGGTCTTTAAGTCTGATGTGAAAGCCT  
TCGGCTTAACCGAAGTAGTGCATTGAAAAGTGAAGACTTGAAGTGCAGAAGAGGAGAGTGGAATCCATGTGTAGCGGTG  
AAATGCGTAGATATTAGGAGGAACACCAGTGGCGAAGGCGGCTCTCTGGTCTGTAACGACGCTGAGGTTCTGAAAGCGTG  
GGTAG

>ASV:314:Species:inops

TACGGAGGATCCAAGCGTTATCCGGATTTATTGGGTTAAAGGGTGCAGTGGCGGAGATTAAGTTAGAGGTGAAATCC  
GAGGCTCAACCTTGGCACTGCTCTGATACTGGTTTCTAGCGAGTAGATGCTGTAGGCGGAATGTGTGGTGTAGCGGTG  
AAATGCATAGAGATCACACAGAACACCAGTGGCGAAGGCGAGTTACAATCTATATCGGACGCTGAGGCACGAAAGCGTG  
GGGAG

>ASV:315:Genus:Terrisporobacter

TACGTAGGGGCTAGCGTTATCCGGATTTACTGGGCTAAAGGGTGCAGTGGGTTTCTTAAGTCAAGGAGTAAAAGGCT  
ACGGCTCAACCGTAGTAAGCTCTTAAAAGTGGGAACTTGAAGTGCAGGAGAGGAAAGTGAATTCCTAGTGTAGCGGTG  
AAATGCGTAGATATTAGGAGGAACACCAGTGGCGAAGGCGGCTTCTGGACTGTAACGACACTGAGGCACGAAAGCGGTG  
GGAGC

>ASV:316:Genus:Oscillibacter

TACGTAGGTGGCAAGCGTTGTCCGGATTTACTGGGTGTAAGGGGCTGCAGCCGGGCTGGTAAGTCAAGTGTGAAATCTG  
GAGGCTCAACCTCAAACTGCATTTGAAAAGTGGTCTTGGTACCGGAGAGGTTATCGGAATTCCTGTGTAGCGGTG  
AAATGCGTAGATATAAGGAAGAACACCAGTGGCGAAGGCGGTAACGACGCGCAACTGACGCTGAGGCACGAAAGCGTG  
GGGAG

>ASV:317:Genus:Ruminococcaceae\_UCG-014

TACGTAGGGAGCAAGCGTTATCCGGATTTATTGGGTGTAAGGGTGCAGTGGGAAATTAAGTTAGTTGTGAAAGCCC  
TCGGCTTAACGAGGAATTGCAACTAAAAGTGGTTTTCTTGGTGCAGGAGAGGTAAGTGAATTCCTAGTGTAGCGGTG  
AAATGCGTAGATATTAGGAGGAACACCAGTGGCGAAGGCGACTTACTGGACTGCAACTGACGTTGAGGCACGAAAGTGTG  
GGGAG

>ASV:318:Family:Lachnospiraceae

TACGTAGGGGGCAAGCGTTATCCGGATTTACTGGGTGTAAGGGGAGCGTAGACGGTATGGCAAGTCTGATGTGAAAGGCC  
AGGGCTCAACCTGGGACTGCATTGAAAAGTGCAGACTAGAGTGTGAGGAGGCAAGTGAATTCCTAGTGTAGCGGTG  
AAATGCGTAGATATTAGGAGGAACACCAGTGGCGAAGGCGGCTTCTGGACGATGACTGACGTTGAGGCTCGAAAGCGTG  
GGGAG

>ASV:319:Genus:Family\_XIII\_UCG-001

TACGTAGGGGGCAAGCGTTGTCCGGATTTATTGGGCGTAAAGAGTACGTAGGCGGTTTGCTAAGCGCAAGGTGAAAGGCA  
GTGGCTTAACCGATTGTAAGCCTTGGCAACTGACAGACTTGGAGTGCAGGAGAGGAAAGCGGAATTCCTAGTGTAGCGGTG  
AAATGCGTAGATATTAGGAGGAACACCAGTGGCGAAGGCGGCTTCTGGACTGTAACGACGCTGAGGTACGAAAGCGTGG  
GGAGC

>ASV:320:Species:angulatum/merycicum

TACGTAGGGTGAAGCGTTATCCGGATTTATTGGGCGTAAAGAGCTCGTAGGCGGTTCTGTCGCGTCCGGTGTGAAAGTCC  
ATCGCTTAACCGTGGATCTGCGCCGGTACGGGCGGGCTGGAGTGCAGGAGAGGAAAGCGGAATTCCTAGTGTAGCGGTG  
GAATGTGTAGATATCGGAAGAACACCAATGGCGAAGGCGAGTCTCTGGCCGTTACTGACGCTGAGGAGCGAAAGCGTG  
GGGAG

>ASV:321:Family:Muribaculaceae

TACGGAGGATGCGAGCGTTATCCGGATTTATTGGGTTAAAGGGAGCGCAGGCTGCGAGGCAAGTCAAGCGTCAATATGT  
GGGGCTCAACCCGGCTGCGCTTGGCAACTGCTCTTCTAGAGTTCGAGTGCAGGATGATGCGGAATGCGTTGTGTAGCGGTG  
AAATGCATAGATATGACGCGAAGTCCGATTGCGAAGGCGAGTACCAACTCGGACTGACGCTGAGGCTCGAAAGCGTGG  
GTATC

>ASV:322:Species:sanguinis

TACGTAGGTGGCGAGCGTTATCCGGATTTATTGGGCGTAAAGAGCGCGAGGTGGTTGATTAAGTCTGATGTGAAAGCCC  
ACGGCTTAACCGTGGAGGGTCAATGGAAACTGGTGCAGTTCAGTGCAGAAGAGGGAAGTGAATTCCTAGTGTAGCGGTG  
AAATGCGTAGAGATATGAGGAACACCAGTGGCGAAGGCGGCTTCTGGTCTGTAACGACACTGAGGCACGAAAGCGTG  
GGGAG

>ASV:323:Family:Ruminococcaceae

TACGTAGGTGGCAAGCGTTGTCCGGATTTACTGGGTGTAAGGGGAGCGCAGGCGGTTGATCAAGTCAAGTGTGAAAAGTCA  
CGGGCTTAACCGTAGACTGCAAGTGAAGTGCATCTTGGAGTGAAGTGAAGGTTGGCGGAATTCGAGTGTAGCGGTG  
AAATGCGTAGATATTGAGGAACACCAGTGGCGAAGGCGGCAACTGGGCTTAACTGACGCTGAGGCTCGAAAGTGTG  
GGGAG

>ASV:324:Species:crecentus/vibrioides

TACGAAGGGGGCTAGCCTTGTCCGGAATTTACTGGGCGTAAAGGGAGCGTAGGCGGACTGTTAAGTTAGAGGTGAAAGCCC  
AGGGCTCAACCTTGGAAATGCTTTGATACTGGCAGTCTTGGTACGGAAGAGGATGTGGAAGTCCGAGTGTAGAGGTG  
AAATTCGTAGATATTGGAAGAACACCAGTGGCGAAGGCGACATACTGGTCCGTTACTGACGCTGAGGCTCGAAAGCGTG  
GGGAG

>ASV:325:Family:Ruminococcaceae

TACGTAGGTGGCAAGCGTTGTCCGGATTTACTGGGTGTAAGGGGAGCGCAGGCGGTTGATCAAGTCAAGTGTGAAAAGTCA  
CGGGCTTAACCGTAGACTGCAAGTGAAGTGCATCTTGGAGTGAAGTGAAGGTTGGCGGAATTCGAGTGTAGCGGTG  
AAATGCGTAGATATTGAGGAACACCAGTGGCGAAGGCGGCAACTGGGCTTAACTGACGCTGAGGCTCGAAAGTGTG



GGGAG  
>ASV:326:Genus:Faecalibacterium  
AACGTAGGTCACAAGCGTTGTCCGGAATTACTGGGTGTAAGGGAGCGCAGGCGGGAAGACAAGTTGGAAGTGAATCTA  
TGGGCTCAACCATAAACTGCTTTCAAACACTGTTTTCTTGAGTAGTGCAGAGGTAGCGGGAATCCCGGTGTAGCGGTG  
GAATGCGTAGATATCGGAGGAACACCAGTGGCGAAGGCGCCTACTGGGTACCAACTGACGCTGAGGCTCGAAAGTGTG  
GGTAG  
>ASV:327:Genus:Veillonella  
TACGTAGGTGGCAAGCGTTGTCCGGAATTATTGGGCGTAAAGCGCGCAGGCGGATCAGTCAGTCTGTCTTAAAGTTC  
GGGGCTTAACTCCGTGATGGGATGGAACACTGCTGATCTAGAGTATCGGAGAGGAAAGTGAATTCCTAGTGTAGCGGTGA  
AATGCGTAGATATTAGGAAGAACACCAGTGGCGAAGGCGACTTTCTGGACGAAAACACTGACGCTGAGGCGGAAAGCCAGG  
GGAGC  
>ASV:328:Genus:Ruminiclostridium\_5  
TACGTAGGGAGCGAGCGTTGTCCGGAATTTACTGGGTGTAAGGGTGCCTAGGCGGCTCTGCAAGTCAGAAGTGAATCCA  
TGGGCTTAAACCATGAACACTGCTTTGAAACTGTAGAGCTTGAAGTGAAGTAGAGGTAGGCGGGAATCCCGGTGTAGCGGTG  
AAATGCGTAGAGATCGGAGGAACACCAGTGGCGAAGGCGCCTACTGGGCTTAACTGACGCTGAGGCACGAAAGCATG  
GGTAG  
>ASV:329:Genus:Parabacteroides  
TACGGAGGATCCGAGCGTTATCCGGATTTATTGGGTTTAAAGGGTGCCTAGGCGGCTTTTAAAGTCAGCGGTGAAAGTCT  
GTGGCTCAACCATAGAATTGCCGTTGAAACTGGGGGCTTGAAGTATGTTTGAAGGAGGCGGGAATGCGTGGTGTAGCGGTG  
AAATGCTTAGATATCACGAAGAACTCCGATTGCGAAGGCGAGCTGCTAAGCTGCAACTGACATTGAGGCTCGAAAGTGTG  
GGTAT  
>ASV:330:Species:tayi  
TACGTAGGGGGCAAGCGTTATCCGGATTTACTGGGTGTAAGGGAGCGTAGACGGCATGGCAAGCCAGATGTGAAAACCC  
AGGGCTCAACCTTGGGATTGCATTTGAACTGCCAGGCTGGAGTGCAGGAGAGGTAAGCGGGAATTCCTAGTGTAGCGGTG  
AAATGCGTAGATATTAGGAGGAACACCAGTGGCGAAGGCGGCTTACTGGACTGTAACGACGTTGAGGCTCGAAAGCGTG  
GGGAG  
>ASV:331:Genus:Lachnospiraceae\_NK4A136\_group  
TACGTAGGGGGCAAGCGTTATCCGGATTTACTGGGTGTAAGGGAGCGTAGACGGTAGACCAAGTCTGAAGTGAAGGCC  
GGGGCTCAACCCGGAACACTGCTTTGAAACTGGTAACTAGAGTGCAGGAGAGGTAAGTGAATTCCTAGTGTAGCGGTG  
AAATGCGTAGATATTAGGAGGAACACCAGTGGCGAAGGCGGCTTACTGGACTGTAACGACGTTGAGGCTCGAAAGCGTG  
GGGAG  
>ASV:332:Order:Mollicutes\_RF39  
TACGTAGGGGGCGAGCGTTATCCGGATTTATTGGGCGTAAAGCGTGCCTAGGCGGTTTATTAAGTCTAGAATTAAGGCC  
GAGGCTTAACTCGGTTCTGTTCTAGATACTGGTTGACTAGAGTACAGTAGAGGCAAATGGAATTCCTAGTGTAGCGGTGG  
AATGCGTAGATATTAGGAGGAACACCAGTGGCGAAGGCGATTGCTGGGCTGTAACGACGCTGAGGTACGAAAGCGTGG  
GTAGC  
>ASV:333:Genus:Blautia  
TACGTAGGGGGCAAGCGTTATCCGGATTTACTGGGTGTAAGGGAGCGTAGACGGCGTGGCAAGTCTGATGTGAAAGGCA  
TGGGCTCAACCTGTGGACTGCATTGAAACTGTCATGCTTGAAGTGCAGGAGGGTAAGCGGGAATTCCTAGTGTAGCGGTG  
AAATGCGTAGATATTAGGAGGAACACCAGTGGCGAAGGCGGCTTACTGGACGTTAAGTACGCTTGGGCTCGAAAGCGTG  
GGGAG  
>ASV:334:Species:vulgatus  
TACGGAGGATCCGAGCGTTATCCGGATTTATTGGGTTTAAAGGGAGCGTAGATGGATATTTAAGTCAGTTGTGAAAGTTT  
GCGGCTCAACCGTAAAATTGCAGTTGATACTGGATATCTTGAAGTGCAGTTGAGGCGAGGCGGGAATTCGTTGGTGTAGCGGTG  
AAATGCTTAGATATCACGAAGAACTCCGATTGCGAAGGCGAGCTGCTAAGCTGCAACTGACATTGAGGCTCGAAAGTGTG  
GGTAT  
>ASV:335:Species:asaccharolytica  
TACGGAGGATGCGAGCGTTATCCGGAATTTATTGGGTTTAAAGGGTGCCTAGGTTGCAAGGGAAGTCAGGGGTGAAAAGCT  
GTAGCTCAACTATGGTCTTGCCTTTGAAACTCTCTAGCTAGAGTGTACTGGAGGTACGTGGAACGTGTGGTGTAGCGGTG  
AAATGCGTAGATATCACACAGAACCTCCGATTGCGCAGGCGAGCTACTACATTACAACACTGACACTGAAGCACGAAAGCGTG  
GGTAT  
>ASV:336:Genus:Faecalibacterium  
AACGTAGGTCACAAGCGTTGTCCGGAATTACTGGGTGTAAGGGAGCGCAGGCGGGAAGACAAGTTGGGAGTGAATCTA  
TGGGCTCAACCATAAACTGCTTTCAAACACTGTTTTCTTGAGTAGTGCAGAGGTAGCGGGAATCCCGGTGTAGCGGTG  
GAATGCGTAGATATCGGAGGAACACCAGTGGCGAAGGCGCCTACTGGGCACCAACTGACGCTGAGGCTCGAAAGTGTG  
GGTAG  
>ASV:337:Species:fermentum/mucosae  
TACGTAGGTGGCAAGCGTTATCCGGATTTATTGGGCGTAAAGCGAGCGCAGGCGGTTTGATAAGTCTGATGTGAAAGCCT  
TTGGCTTAAACAAAGAGTGCATCGGAAACTGTCAGACTTGAAGTGCAGAGAGGACAGTGGAACTCCATGTGTAGCGGTG  
GAATGCGTAGATATATTAGGAAGAACACCAGTGGCGAAGGCGGCTGCTGGTCTGCAACTGACGCTGAGGCTCGAAAGCATG  
GGTAG  
>ASV:338:Species:faecihominis  
TACGTAGGGAGCAAGCGTTATCCGGATTTACTGGGTGTAAGGGCGCGCAGGCGGGCCGGCAAGTTGGAAGTGAATCTA  
TGGGCTTAAACCATAAACTGCTTTCAAACACTGCTGGTCTTGAAGTGCAGAGGCGAGGCGGGAATCCCGTGTGTAGCGGTG  
AAATGCGTAGATATACGAGGAACACCAGTGGCGAAGGCGGCTGCTGGACATTAACACTGACGCTGAGGCGGAAAGCGTG  
GGGAG  
>ASV:339:Species:bouvetii/haemolyticus/johnsonii/junii  
TACAGAGGGTGCAGCGTTAATCCGATTTACTGGGCGTAAAGCGTGCCTAGGCGGCTTCTTAAGTCGGATGTGAATCCC

TGAGCTTAACCTAGGAATTGCATTCGATACTGGGAAGCTAGAGTATGGGAGAGGATGGTAGAATTCCAGGTGTAGCGGTG  
AAATGCGTAGAGATCTGGAGGAATACCGATGGCGAAGGCAGCCATCTGGCCTAATACTGACGCTGAGGTACGAAAGCATG  
GGGAG

>ASV:340:Species:phage/reuteri/salivarius

TACGTAGGTGGCAAGCGTTGTCCGGATTTATTGGGCGTAAAGGGAACGCAGGCGGTCTTTAAGTCTGATGTGAAAGCCT  
TCGGCTTAACCGGAGTAGTGCATTGAAACTGGAAGACTTGAGTGCAGAAGAGGAGAGTGGAATCCATGTGTAGCGGTG  
AAATGCGTAGATATATGGAAGAACCACAGTGGCGAAAGCGGCTCTCTGGTCTGTAACGACGCTGAGGTTCGAAAGCGTG  
GGTAG

>ASV:341:Genus:Proteus

TACGGAGGGTGAAGCGTTAATCGGAATTACTGGGCGTAAAGCGCACGCAGGCGGTCAATTAAGTCAGATGTGAAAGCCC  
CGAGCTTAACCGGATTGCATCTGAAACTGGTTGGCTAGAGTCTTGTAGAGGGGGGTAGAATCCATGTGTAGCGGTG  
AAATGCGTAGAGATGTGGAGGAATACCGTGGCGAAGGCGGCCCTTGACAAAGACTGACGCTCAGGTGCGAAAGCGTG  
GGGAG

>ASV:342:Genus:Alloprevotella

TACGGAAGGTCCAGGCGTTATCCGGATTTATTGGGTTTAAAGGGAGCGCAGGCGGACCTTTAAGTCAGCTGTGAAATACG  
GCGGCTCAACCGTCAACTGCAGTTGATACTGGAGGTCTTGTAGTGCACACAGGGATACTGGAATTCATGGTGTAGCGGTG  
AAATGCTCAGATATCATGAAGAACCAGTCCGATCGCAAGGCAGGTATCCGGGTGCAACTGACGCTGAGGCTCGAAAGTGCG  
GGTAT

>ASV:343:Genus:Olsenella

TACGTAGGGGGCAAGCGTTATCCGGATTCATTGGGCGTAAAGCGCGCTAGGCGGCCAGCCTGGTCCGGAGTCAAATCCG  
GGGGCTCAACCCCGTCCGCTCCCGATACCGGCCGGCTTGAGTCTGGCAGGGGAAGGCGGAATTCCTGGTGTAGCGGTGG  
AATGCGCAGATATCGGGAAGAACACCGGTGGCGAAGGCGGCCCTTCTGGGCCACGACTGACGCTGAGGCGCGAAAGCTAGG  
GGAG

>ASV:344:Genus:Bacteroides

TACGGAGGATCCGAGCGTTATCCGGATTTATTGGGTTTAAAGGGAGCGTAGGTGGATTGTTAAGTCAGTTGTGAAAGTTT  
GCGGCTCAACCGTAAAATTGCAGTTGAAACTGGCAGTCTTGTAGTACAGTAGAGGTGGGCGGAATTCGTGGTGTAGCGGTG  
AAATGCTTAGATATCACGAAGAACCAGTCCGATGCGAAGGCAGCTCACTAGACTGTAACGACACTGATGCTCGAAAGTGTTG  
GGTAT

>ASV:345:Genus:Negativibacillus

TACGTAGGTGGCAAGCGTTGTCCGGAACTACTGGGTGTAAGGGAGCGTAGGCGGGGAGGCAAGTTGAATGTCTAAACTA  
TCGGCTCAACTGATAGTCCGTTCAAACCTGCCACTCTTGTAGTGCAGTAGAGGTAGGCGGAATTCCTAGTGTAGCGGTGA  
AATGCGTAGATATTAGGAGGAACACCAAGTGGCGAAGGCGGCCCTACTGGGCTGTAACGACGCTGAGGCTCGAAAGCGTGG  
GTAGC

>ASV:346:Species:anginosus/cristatus/gordonii/infantis/mitis/oralis/pneumoniae/  
pseudopneumoniae/sanguinis/timonensis

TACGTAGGTCCCGAGCGTTGTCCGGATTTATTGGGCGTAAAGCGAGCGCAGGCGGTTAGATAAGTCTGAAGTTAAAGGCT  
GTGGCTTAACCATAGTACGCTTTGGAAACTGTTAACTTTGAGTGCAGAGGGGAGAGTGGAATTCATGTGTAGCGGTGA  
AATGCGTAGATATATGGAAGAACCACAGTGGCGAAGGCGGCCCTCTGGCTTGTAACTGACGCTGAGGCTCGAAAGCGTGG  
GGAG

>ASV:347:Species:baumannii/bouvetii/haemolyticus/johnsonii/junii/lwoffii/oleivorans/oryzae/  
schindleri

TACAGAGGGTGCAGCGTTAATCGGATTTACTGGGCGTAAAGCGTGCAGGCGGCTTTTAAAGTCGGATGTGAAATCCC  
TGAGCTTAACCTAGGAATTGCATTCGATACTGGGAAGCTAGAGTATGGGAGAGGATGGTAGAATCCAGGTGTAGCGGTG  
AAATGCGTAGAGATCTGGAGGAATACCGATGGCGAAGGCAGCCATCTGGCCTAATACTGACGCTGAGGTACGAAAGCATG  
GGGAG

>ASV:348:Species:bombi/cibaria/confusa/hellenica/koreensis/paramesenteroides

TACGTATGTTCAAGCGTTATCCGGATTTATTGGGCGTAAAGCGAGCGCAGGCGGTTATTTAAGTCTGAAGTAAAGCCC  
TCAGCTCAACTGAGGAATTGCTTTGAAACTGGATGACTTGTAGTGCAGTAGAGGAAAGTGGAACTCCATGTGTAGCGGTG  
AAATGCGTAGATATATGGAAGAACCACAGTGGCGAAGGCGGCCCTTCTGGACTGTAACGACGTTGAGGCTCGAAAGTGTTG  
GGTAG

>ASV:349:Genus:Bacteroides

TACGGAGGATTCGAGCGTTATCCGGATTTATTGGGTTTAAAGGGAGCGTAGGCGGGTGTAAAGTCAGTTGTGAAAGTTT  
GCGGCTCAACCGTAAAATTGCAGTTGATACTGGGACCTTGTAGTGCACAGAGGTAGGCGGAATTCGTGGTGTAGCGGTG  
AAATGCTTAGATATTACGAAGAACCAGTCCGATGCGAAGGCAGCTTACTGGATTGTAACGACGCTGATGCTCGAAAGTGTTG  
GGTAT

>ASV:350:Genus:Butyricicoccus

TACGTAGGGAGCAAGCGTTATCCGGATTTACTGGGTGTAAGGGCGCGCAGGCGGGCCGCAAGTTGGAAGTAAATCCC  
GGGGCTTAACCCCGAACTGCTTTCAAACCTGCTGGTCTTGTAGTGTGAGAGGCAGGCGGAATTCCTGTGTAGCGGTG  
AAATGCGTAGATATACGGAGGAACACCAGTGGCGAAGGCGGCCCTGCTGGACATTAACGACGCTGAGGCGCGAAAGCGTG  
GGGAG

>ASV:351:Genus:Clostridium\_sensu\_stricto\_1

TACGTAGGTGGCAAGCGTTGTCCGGATTTACTGGGCGTAAAGGGAGCGTAGGCGGACTTTTAAAGTGTGATGTGAAATACC  
CGGGCTCAACTGGGTGCTGCATTTCAAACCTGGAAGTCTAGAGTGCAGGAGAGGAGAATGGAATTCCTAGTGTAGCGGTG  
AAATGCGTAGAGATTAGGAAGAACCACAGTGGCGAAGGCGGATCTCTGGACTGTAACGACGCTGAGGCTCGAAAGCGTG  
GGGAG

>ASV:352:Genus:Prevotella\_9

TACGGAAGGTCCGGGCGTTATCCGGATTTATTGGGTTTAAAGGGAGCGTAGGCGGAGATTAAGCGTGTGTGAAATGTA  
GATGCTCAACGCTGCACTGCAGCGCAACTGGTTTCTTGTAGTACGCACAAAGTGGGCGGAATTCGTGGTGTAGCGGTG

AAATGCTTAGATATCACGAAGAACTCCGATTGCGAAGGCAGCTTACTGGAGCGCAACTGACGCTGAAGCTCGAAAGTGCG  
GGTAT  
>ASV:353:Species:crispatus/gasseri/helveticus/hominis/iatae/johnsonii/kefiranofaciens/prophage/  
taiwanensis  
TACGTAGGTGGCAAGCGTTGTCCGGATTTATTGGGCGTAAAGCGAGTGCAGGCGGTTCAATAAGTCTGATGTGAAAGCCT  
TCGGCTCAACCGGAGAACTGCATCAGAACTGTTGAACCTGAGTGCAGAAAGGAGAGTGGAATCCATGTGTAGCGGTG  
GAATGCGTAGATATATGGAAGAACACCCAGTGGCGAAGGCGGCTCTCTGGTCTGCAACTGACGCTGAGGCTCGAAAGCATG  
GGTAG  
>ASV:354:Genus:Ruminococcaceae\_UCG-014  
TACGTAGGGAGCAAGCGTTATCCGGATTTATTGGGTGTAAGGGTGCCTAGACGGGAAATTAAGTTAGTTGTGAAATCCC  
TCGGCTTAACCTGAGGAACTGCAACTAAAACCTGATTTCTTGGAGTGCCTGGAGAGGAAAGTGGAATTCCTAGTGTAGCGGTG  
AAATGCGTAGATATTAGGAGGAACACCCAGTGGCGAAGGCGACTTTCTGGACAGTAACGACGTTGAGGCACGAAAGTGTG  
GGGAG  
>ASV:355:Genus:Prevotella\_9  
TACGGAAGGTCCGGGCTTATCCGGATTTATTGGGTTAAAGGGAGCGTAGGCCGGAGATTAAGCGTGTGTGAAATGTA  
GATGCTCAACATCTGCACTGCAGCGCAACTGGTTTTCTTGGAGTACGCACAAAGTGGGCGGAATTCGTGGTGTAGCGGTG  
AAATGCTTAGATATCACGAAGAACTCCGATTGCGAAGGCAGCTACTGGAGCGCAACTGACGCTGAAGCTCGAAAGTGCG  
GGTAT  
>ASV:356:Class:Clostridia  
TACGTAGGGGGCGAGCGTTGTCCGGAATTACTGGGCGTAAAGGGTGCCTAGGCGGTTAATTAAGTTGGATGTGAAATCC  
CGGGCTTAACCTGGGAGCTGCATTCAAACCTGGTAACTAGAGTTACAGGAGAGGGAAGCGGAATTCCTAGTGTAGCGGTG  
AAATGCGTAGATATTAGGAGGAACACCCGTTGGCGAAGGCGGCTTTCTGGACTGACACTGACGCTGAGGCACGAAAGCGTG  
GGGAG  
>ASV:357:Species:massiliensis  
TACGGAGGATCAAGCGTTATCCGGATTTATTGGGTTAAAGGGTGCCTAGGCGGTTGATAAGTTAGAGGTGAAATCCC  
GGGGCTTAACCTCCGGAATTGCCTCTGATACTGTTGGCTAGAGAGTAGTTGCGGTAGGCGGAATGTATGGTGTAGCGGTG  
AAATGCTTAGAGATCATACAGAACACCCGATTGCGAAGGCAGCTTACCAAATATATCTGACGTTGAGGCACGAAAGCGTG  
GGGAG  
>ASV:358:Family:Ruminococcaceae  
TACGTAGGTGGCAAGCGTTGTCCGGAATTACTGGGTGTAAGGGTGCCTAGGCGGATTGCAAGTTGGATGTGAAATACC  
GGGGCTTAACCCGGAGCTGCATCAAACCTGATGTTCTTGGAGTGGAGTAGAGGTAAGCGGAATTCGAGTGTAGCGGTG  
AAATGCGTAGATATTGAGGGAACACCCAGTGGCGAAGGCGGCTTACTGGGCTCTAACGACGCTGAGGCACGAAAGCATG  
GGTAG  
>ASV:359:Genus:Ruminiclostridium\_9  
TACGTAGGTGGCAAGCGTTATCCGGATTTACTGGGTGTAAGGGGCGTGTAGGCGGATTGCAAGTCAGATGTGAAAACCA  
CGGGCTCAACCTGTGGCCTGCATTTGAAACTGCAGTCTTGGAGTACTGGAGAGGCAGACGGAATTCCTAGTGTAGCGGTG  
AAATGCGTAGATATTAGGAGGAACACCCAGTGGCGAAGGCGGCTGCTGGACAGCAACTGACGCTGAGGCGCGAAAGCGTG  
GGGAG  
>ASV:360:Genus:Lachnoclostridium  
TACGTAGGGGGCAAGCGTTATCCGGATTTACTGGGTGTAAGGGGAGCGTAGACGGCATGGCAAGTCTGAAGTAAAAGCCC  
GGGGCTCAACCCGGGACTGCTTTGAAACTGTCAGGCTAGAGTGCCTGGAGAGGTAAGTGGAAATTCCTAGTGTAGCGGTG  
AAATGCGTAGATATTAGGAGGAACACCCAGTGGCGAAGGCGGCTTACTGGACAGTACTGACGTTGAGGCTCGAAAGCGTG  
GGGAG  
>ASV:361:Genus:Lachnospiraceae\_FCS020\_group  
TACGTAGGGGGCAAGCGTTATCCGGATTTACTGGGTGTAAGGGGAGCGTAGACGGCTTTGCAAGTCTGACGTGAAACTCC  
GGGGCTCAACTCCGGAAGTGCCTTTGAAACTGTAAGGCTTGGAGTGCCTGGAGAGGTAAGCGGAATTCCTAGTGTAGCGGTG  
AAATGCGTAGATATTAGGAGGAACACCCAGTGGCGAAGGCGGCTTACTGGACAGTACTGACGTTGAGGCTCGAAAGCGTG  
GGGAG  
>ASV:362:Species:oleiciplenus/stercorisoris  
TACGGAGGATCCGAGCGTTATCCGGATTTATTGGGTTAAAGGGGAGCGTAGGCGGAAGCTTAAGTCAGTTGTGAAAGTTT  
GCGGCTCAACCGTAAAATTGCAGTTGATACTGGGTTCTTGGAGTGCAGTAGAGGTAGGCGGAATTCGTGGTGTAGCGGTG  
AAATGCTTAGATATCACGAAGAACTCCGATTGCGAAGGCAGCTTACTGGACTGTAACGACGCTGATGCTCGAAAGTGTG  
GGTAT  
>ASV:363:Genus:Rikenellaceae\_RC9\_gut\_group  
TACGGGGGATGCGAGCGTTATCCGGATTTATTGGGTTAAAGGGTGCCTAGGCGGCAAGGTAAGTCAGCGGTGAAAGACC  
AGGGCTCAACTCTGGAAGTGCCTTTGATACTGCTGGCTAGAATGATCCGCGTGGGAGGAATGAGTAGTGTAGCGGTG  
AAATGCTAGATATTACTCAGAACACCCAGTGGCGAAGGCATCTCACAGGAGTTGATTGACGCTGAGGCACGAAAGCGTG  
GGGAT  
>ASV:364:Genus:Barnesiella  
TACGGAGGATGCAAGCGTTATCCGGATTTATTGGGTTAAAGGGTGCCTAGGCGGCACGCCAAGTCAGCGGTGAAATTTCC  
CGGGCTCAACCCGGACTGTGCCGTTGAAACTGGCAGCTAGAGTACACAAGAGGCAGGCGGAATGCGTGGTGTAGCGGTG  
AAATGCTAGATATACGCAGAACCCGATTGCGAAGGCAGCTGCTAGGGTAAAACAGACGCTGAGGCACGAAAGCGTG  
GGTAT  
>ASV:365:Genus:Ruminococcaceae\_UCG-014  
TACGTAGGGAGCAAGCGTTATCCGGATTTATTGGGTGTAAGGGTGCCTAGACGGGAAATTAAGTTAGTTGTGAAATCCC  
TCGGCTTAACCTGAGGAACTGCAACTAAAACCTGATTTCTTGGAGTGCCTGGAGAGGAAAGTGGAATTCCTAGTGTAGCGGTG  
AAATGCGTAGATATTAGGAGGAACACCCAGTGGCGAAGGCGACTTTCTGGACAGTAACGACGTTGAGGCACGAAAGTGTG  
GGGAG

>ASV:366:Genus:Ruminiclostridium\_6  
TACGTAGGTGGCAAGCGTTGTCCGGAATTACTGGGTGTAAGGGAGTGTAGGCGGGATATCAAGTCAGAAGTGAAAATTA  
CGGGCTCAACTCGTAACCTGCTTTTAAAAGTACATTCTTGTAGTGAAGTAGAGGCAAGCGGAATTCCTTGTAGCGGTG  
AAATGCGTAGATATTAGGAGGAACACCAAGTGGCGAAGGCGGCTTGTGGGCTTTTACTGACGCTGAGGCTCGAAAGCGTG  
GGGAG

>ASV:367:Genus:UBA1819  
AACGTAGGTGGCAAGCGTTGTCCGGAATTACTGGGTGTAAGGGAGCGCAGGCGGGTTCGTAAGTTGGGAGTGAAAACCTA  
TGGGCTCAACCATAAATTGCTTTTAAAAGTACTGATCTTGTAGTGGTGTAGAGGTAGGCGGAATTCCTGTTAGCGGTG  
GAATGCGTAGATATTAGGAGGAACACCAAGTGGCGAAGGCGGCTACTGGGCACTAACTGACGCTGAGGCTCGAAAGCATG  
GGTAG

>ASV:368:Genus:Christensenellaceae\_R-7\_group  
TACGTAGGGGGCGAGCGTTGTCCGGAATGATTGGGCGTAAAGGGCGCTAGGCGGCTGCTAAGTCTGGAGTGAAAAGTCC  
TGCTTTCAAGGTGGGAAAGTGCCTTTGGATACTGGTGGGCTGGAGTGCAGGAGAGGAAAGCGGAATTCCTGTTAGCGGTG  
AAATGCGTAGAGATCGGTAGGAACACCAAGTGGCGAAGGCGGCTTCTGGACTGAAAAGTACGCTGAGGCGGAAAGCGTG  
GGGAG

>ASV:369:Genus:Rikenellaceae\_RC9\_gut\_group  
TACGGGGGATGCGAGCGTTATCCGGATTTATTGGGTTTAAAGGGTGCCTAGGCGGCAAGTAAGTCAGCGGTGAAAAGACC  
AGGGCTCAACCCTGGAAAGTGCCTTTGAAACTGCTGACTAGAGTGTCCGCGTGGGAGGAATGAGTAGTGTAGCGGTG  
AAATGCATAGATATTACTCAGAACACCGATTGCGAAGGCATCTCACGAGGGTTTATTGACGCTGAGGCACGAAAGCGTG  
GGGAT

>ASV:370:Genus:Agathobacter  
TACGTATGGTGAAGCGTTATCCGGATTTACTGGGTGTAAGGGAGCGCAGGCGGTGCGGCAAGTCTGATGTGAAAAGCCC  
GGGACTCAACCCTGGTACTGCATTTGAAACTGCTGACTAGAGTGTCCGAGGGTAAGCGGAATTCCTAGTGTAGCGGTG  
AAATGCGTAGATATTAGGAGGAACACCAAGTGGCGAAGGCGGCTTACTGGACGATAACTGACGCTGAGGCTCGAAAGCGTG  
GGGAG

>ASV:371:Species:colymbi/donghaensis/neustonensis/sanguineus/tepidarius  
TACGGAGGGAGCTAGCGTTGTCCGGAATTACTGGGCGTAAAGCGCACGTAGGCGGCTTTTAAAGTACAGGGGTGAAAATCCC  
GGGGCTCAACCCTGGAAAGTGCCTTTGAAACTGGGAAGCTAGAATCTTGGAGAGGCGAGTGGAATTCGAGTGTAGAGGTG  
AAATTCGTAGATATTCCGAAGAACACCAAGTGGCGAAGGCGACTCGCTGGACAAGTATTGACGCTGAGGTGCGAAAGCGTG  
GGGAG

>ASV:372:Genus:Anoxybacillus  
TACGTAGGTGGCAAGCGTTGTCCGGAATTTATTGGGCGTAAAGCGCGCAGGCGGTCTTTAAGTCTGATGTGAAAAGCCC  
ACGGCTCAACCCTGGAGGGTATTGGAAGTGGGGGACTTGAAGTGCAGAAGAGGAGAGCGGAATTCACGTTAGCGGTG  
AAATGCGTAGAGATGTGGAGGAACACCAAGTGGCGAAGGCGGCTCTCTGGTCTGTAAGTACGCTGAGGCGGAAAGCGTG  
GGGAG

>ASV:373:Species:nordii  
TACGGAGGATCCGAGCGTTATCCGGATTTATTGGGTTTAAAGGGAGCGTAGGTTGGACATGTAAGTCAGTTGTGAAAAGTTT  
GCGGCTCAACCCTGAAATTTGCAAGTTGATACTGTGTCTTGAAGTACAGTAGAGGTGGGCGGAATTCGTGGTGTAGCGGTG  
AAATGCTTAGATATCACGAAGAAGTCCGATTGCGAAGGCAGTCTACTGGACTGTTACTGACACTGAGGCTCGAAAGTGTG  
GGTAT

>ASV:374:Genus:Bacteroides  
TACGGAGGATCCGAGCGTTATCCGGATTTATTGGGTTTAAAGGGAGCGCAGACGGGTTTTTAAAGTACGCTGTGAAAAGTTT  
GGGGCTCAACCCTGAAATTTGCAAGTTGATACTGGAGACCTTGAAGTGCAGTTGAGGCGAGGCGGAATTCGTGGTGTAGCGGTG  
AAATGCTTAGATATCACGAAGAAGTCCGATTGCGAAGGCAGTCTACTGAAAGTAACTGACGTTATGCTCGAAAGTGTG  
GGTAT

>ASV:375:Genus:Prevotella\_9  
TACGGAAAGGTCCGAGCGTTATCCGGATTTATTGGGTTTAAAGGGAGCGTAGGCGGAGATTAAGCGTGTGTGAAAATGTA  
GACGCTCAACGCTGCACTGCAAGCGCAACTGGTTTCTTGAAGTACGCACAAAGTGGGTGGAATTCGTGGTGTAGCGGTG  
AAATGCTTAGATATCACGAAGAAGTCCGATTGCGAAGGCAGTCTACTGGAGCGCAACTGACGCTGAAGCTCGAAAGTGTG  
GGTAT

>ASV:376:Family:Ruminococcaceae  
TACGTAGGTGGCAAGCGTTGTCCGGAATTACTGGGTGTAAGGGAGCGTAGGCGGGCAGGCAAGTACAGGCTGAAAATATA  
TCGGCTCAACCCTGATCTGCGCTTGAAGTGCAGGCTTGTAGTGAAGTAGAGGTTGGCGGAATTCCTAGTGTAGCGGTG  
AATGCGTAGATATTAGGAGGAACACCAAGTGGCGAAGGCGGCCAACTGGGCTTTTACTGACGCTGAGGCTCGAAAGTGTG  
GGAGC

>ASV:377:Genus:Salmonella  
TACGGAGGGTGGCAAGCGTTAATCGGAATTACTGGGCGTAAAGCGCACGAGGCGGTCTGTCAAGTCCGATGTGAAAATCCC  
CGGGCTCAACCCTGGAAAGTGCATTGAAACTGGCAGGCTTGAAGTCTTGTAGAGGGGGTAGAATTCAGGTGTAGCGGTG  
AAATGCGTAGAGATCTGGAGGAATACCGGTGGCGAAGGCGGCCCTGGACAAGACTGACGCTCAGGTGCGAAAGCGTG  
GGGAG

>ASV:378:Genus:Ruminococcus\_1  
TACGTAGGGAGCGAGCGTTGTCCGGAATGACTGGGTGTAAGGGAGCGTAGGCGGGATGGCAAGTCAAGTGTGAAAAGCTG  
AGGGCTCAACCCTCAGACTGCATTTGAAACTGCTGTTCTTGAAGTGAAGTAGAGGTAAAGCGGAATTCCTGGTGTAGCGGTG  
AAATGCGTAGAGATCAGGAGGAACATCGGTGGCGAAGGCGGCTTACTGGGCTTTTACTGACGCTGAGGCTCGAAAGCGTG  
GGGAG

>ASV:379:Genus:Cloacibacterium  
TACGGAGGGTGGCAAGCGTTATCCGGATTTATTGGGTTTAAAGGGTCCGTAGGCGGACTTATAAGTCAAGTGGTGTGAAAAGCTT  
GTCGCTTAACGATAGAAGTCCATTGATACTGTAAGTCTTGAAGTATTTGAGGTAGCTGGAATAAGTGTAGTGTAGCGGTG

AAATGCATAGATATTACGTAGAACACCAATTGCGAAGGCAGGTTACCAAGATATAACTGACGCTGAGGGACGAAAGCGTG  
GGGAG  
>ASV:380:Species:insidiosa/pickettii/solanacearum/syzygii  
TACGTAGGGTCCAAGCGTTAATCGGAATTACTGGGCGTAAAGCGTGCAGGCGGTTGTCAAGACCGATGTGAAATCCC  
CGGGCTTAACCTGGGAATTGCATTGGTGACTGCACGGCTAGAGTGTGTGAGAGGGGGGTAGAATCCACGTGTAGCAGTG  
AAATGCGTAGAGATGTGGAGGAATACCGATGGCGAAGGCAGCCCCCTGGGATAACACTGACGCTCATGCACGAAAGCGTG  
GGGAG  
>ASV:381:Family:Ruminococcaceae  
TACGTAGGTGGCAAGCGTTGTCCGGAATTACTGGGTGTAAGGGAGCGCAGGCGGGAATCAAGTTGGATGTGAAATGTC  
GGGGCTTAACCCGGAAGTGCATCCAAACTGATATCTTGGAGTGAAGTAGAGGTAGGCGGAATCCGAGTGTAGCGGTG  
AAATGCGTAGATATTCGGAGGAACACCAAGTGGCGAAGGCAGCCCTACTGGGCTTAACTGACGCTGAGGCTCGAAAGTGTG  
GGGAG  
>ASV:382:Genus:Subdoligranulum  
AACGTAGGGTGCAGCGTTGTCCGGAATTACTGGGTGTAAGGGAGCGCAGGCGGACCGCAAGTTGGAAGTAAAACCTA  
TGGGCTCAACCTATAAATTGCTTTCAAACCTGCTGGCCTTGGAGTAGTGCAGAGGTAGGTGGAATCCCGGTGTAGCGGTG  
GAATGCGTAGATATTCGGAGGAACACCAAGTGGCGAAGGCAGCCTACTGGGCACCAACTGACGCTGAGGCTCGAAAGCATG  
GGTAG  
>ASV:383:Genus:Ruminococcaceae\_UCG-005  
TACGTAGGTGGCAAGCGTTGTCCGGAATTACTGGGTGTAAGGGCGTGTAGGCGGGAGAGCAAGTCAGAAGTAAAATCTA  
TGGGCTTAACCCATAAACTGCTTTTAAAACCTGCTTCTTGGAGTATCGGAGAGGCAGGCGGAATCCCTAGTGTAGCGGTG  
AAATGCGTAGATATTAGGAGGAACACCAAGTGGCGAAGGCAGCCCTGCTGGACGACAACCTGACGCTGAGGCGCGAAAGCGTG  
GGGAG  
>ASV:384:Genus:Barnesiella  
TACGGAGGATGCAAGCGTTATCCGGATTTATTGGGTTTAAAGGGTGCCTAGGCGGCACGCCAAGTCAGCGGTGAAATTT  
CGGGCTCAACCCGACTGTGCCGTTGAAACTGGCAGCTAGAGTGCACAAGAGGCAGGCGGAATGCGTGGTGTAGCGGTG  
AAATGCATAGATATCACGCAGAACCCGATTGCGAAGGCAGCCTGCTAGGGTGCACAGACGCTGAGGCACGAAAGCGTG  
GGTAT  
>ASV:385:Order:Mollicutes\_RF39  
TACGTAGGGAGCGAGCGTTATCCGGATTTATTGGGCGTAAAGCGTGCCTAGGCGGTTTATTAAGTTAAGATGAAAGGCT  
GGGGCTCAACTCCAGTTTGTCTTAAAAACTGGTAAGCTTGGATATGGTAGAGGTAAATGGAATTTCTAGTGTAGCGGTGG  
AATGCGTAGATATTAGAAGGAACACCAAGTGGCGAAGGCAGTTACTAGGCCAAAACCTGACGCTGAGGCGCAAAAGCGTG  
GGAGC  
>ASV:386:Genus:Butyricimonas  
TACGGGGGATGCGAGCGTTATCCGGATTTATTGGGTTTAAAGGGCGCTAGGCGGGACGGCAAGTCAGCGGTAAAAGACT  
GCAGCTAAACTGTAGCACGCCGTTGAAACTGTGACCTGGAGACGAGACGAGGGAGGCGGAACAAGTGAAGTAGCGGTGA  
AATGCATAGATATCACTTGAACCCGATAGCGAAGGCAGCTTCCCAGGCTCGGTCTGACGCTGATGCGCGAGAGCGGTG  
GTAGC  
>ASV:387:Genus:Ruminococcaceae\_UCG-002  
TACGTAGGTGGCAAGCGTTGTCCGGAATTACTGGGTGTAAGGGCGTGTAGCCGGGAAGGCAAGTCAGATGTGAAATCCA  
CGGGCTTAACCTCGTGAAGTGCATTTGAAACTGTTTTTCTTGGAGTATCGGAGAGGCAATCGGAATTTCTAGTGTAGCGGTG  
AAATGCGTAGATATTAGGAGGAACACCAAGTGGCGAAGGCAGTTGCTGGACGACAACCTGACGCTGAGGCGCGAAAGCGTG  
GGGAG  
>ASV:388:Genus:Prevotella\_2  
TACGGAAAGTCCGGGCTTATCCGGATTTATTGGGTTTAAAGGGAGCGTAGGCGCTGCTGGTAAGCGTGTGTGAAATGTC  
GGGGCTCAACCTGGGCTTGCAGCGGAACTGTCAGACTTGGAGTGCAGCGGGAAGTAGGCGGAATTCGTCGTGTAGCGGTG  
AAATGCTTAGATATGACGAAGAACCTCCGATTGCGAAGGCAGCCTGCTGTAGCGCAACTGACGCTGAAGCTCGAAAGCGTG  
GGTAT  
>ASV:389:Genus:Blautia  
TACGTAGGGGGCAAGCGTTATCCGGATTTACTGGGTGTAAGGGAGCGTAGACGGCATAACAAGTCTGATGTGAAAGGCT  
GGGGCTTAACCCGGGACTGCATTGAAACTGTTAAGCTTGGAGTGCAGGAGGGTAAGCGGAATTTCTAGTGTAGCGGTG  
AAATGCGTAGATATTAGGAGGAACACCAAGTGGCGAAGGCAGCCTACTGGACGGTAACCTGACGCTGAGGCTCGAAAGCGTG  
GGGAG  
>ASV:390:Family:Ruminococcaceae  
TACGTAGGTGGCAAGCGTTGTCCGGAATTACTGGGTGTAAGGGAGCGTAGGTTGGGATGCCAAGTCAGCTGTGAAAACCTA  
TGGGCTTAACCTGTAGACTGCAGTTGAAACTGGTATCTTGGAGTGAAGTAGAGGTTGGCGGAATCCGAGTGTAGCGGTG  
AAATGCGTAGATATTCGGAGGAACACCGGTGGCGAAGGCAGCCAACTGGGCTTAACTGACGCTGAGGCTCGAAAGTGTG  
GGGAG  
>ASV:391:Genus:Lachnoclostridium  
TACGTAGGGGGCAAGCGTTATCCGGATTTACTGGGTGTAAGGGAGCGCAGACGGCGATGCAAGTCTGAAGTAAAAGCCC  
GGGGCTCAACCCGGGACTGCTTTGAAACTGTATGGCTAGAGTGTGGAGAGGCAAGCGGAATTTCTAGTGTAGCGGTG  
AAATGCGTAGATATTAGGAAGAACACCAAGTGGCGAAGGCAGCCTGCTGGACAGTAACCTGACGCTCAGGCTCGAAAGCGTG  
GGGAG  
>ASV:392:Species:secunda  
TACGTAGGGTGCAGCGTTAATCGGAATTACTGGGCGTAAAGCGTGCAGGCGGTTGGGTAAGACAGGTGTGAAATCCC  
CGAGCTTAACCTGGGAAGTGCATTTGTGACTGCTCAACTAGAGTATGTCAGAGGGAGGTGGAATTTCAAAGTGTAGCAGTG  
AAATGCGTAGATATTTGGAAGAACACCGATGGCGAAGGCAGCCTCCTGGGATAAATACTGACGCTCATGCACGAAAGCGTG  
GGGAG  
>ASV:393:Genus:Faecalibacterium

AACGTAGGTCACAAGCGTTGTCCGGAATTACTGGGTGTAAAGGGAGCGCAGGCGGGAGAACAAGTTGGAAGTGAAATCCA  
TGGGCTCAACCCATGAACTGCTTTCAAACCTGTTTTCTTGTAGTAGTGTAGAGGTAGGCGGAATTCCTGGTGTAGCGGTG  
GAATGCGTAGATATCGGGAGGAACACCAGTGGCGAAGGCGGCTACTGGGCACCAACTGACGCTGAGGCTCGAAAGTGTG  
GGTAG

>ASV:394:Genus:Subdoligranulum

AACGTAGGGTGCACAGCGTTGTCCGGAATTACTGGGTGTAAAGGGAGCGCAGGCGGACCGGCAAGTTGGAAGTGAAAACCA  
CGGGCTCAACCCGTGAATTGCTTTCAAACCTGCTGGCCTTGTAGTAGTGCAGAGGTAGGTGGAATTCCTGGTGTAGCGGTG  
GAATGCGTAGATATCGGGAGGAACACCAGTGGCGAAGGCGACCTACTGGGCACCAACTGACGCTGAGGCTCGAAAGCATG  
GGTAG

>ASV:395:Species:alactolyticus/equinus/galloyticus/macedonicus/pasteuri/pasteurianus/  
thermophilus

TACGTAGGTCCCGAGCGTTGTCCGGATTTATTGGGCGTAAAGCGAGCGCAGGCGGTTAATAAGTCTGAAGTTAAAGGCA  
GTGGCTTAACCTATTGTTTCGCTTTGAAACTGTAAACTTGTAGTGCAGAAGGGGAGAGTGGAATTCATGTGTAGCGGTGA  
AATGCGTAGATATATGGAGGAACACCAGTGGCGAAGGCGGCTCTCTGGTCTGTAAGTACGCTGAGGCTCGAAAGCGTGG  
GGAG

>ASV:396:Species:arfidensis/fonticaldi

TACGTAGGGTGCAGCGTTAATCGGAATTACTGGGCGTAAAGCGTGCAGGCGGCTTGTGAAGACAGAGGTGAAATCCC  
TGGGCTCAACCCATAAATTGCTTTCAAACCTGTTGGCCTTGTAGTAGTGCAGAGGTAGGTGGAATTCCTGGTGTAGCAGTG  
AAATGCGTAGATATGCGGAGGAACACCAGTGGCGAAGGCGACTCCCTGGGCTGCACTGACGCTCATGCACGAAAGCGTG  
GGAG

>ASV:397:Genus:Subdoligranulum

AACGTAGGGTGCACAGCGTTGTCCGGAATTACTGGGTGTAAAGGGAGCGCAGGCGGACCGGCAAGTTGGAAGTGAAAACCA  
TGGGCTCAACCCATAAATTGCTTTCAAACCTGTTGGCCTTGTAGTAGTGCAGAGGTAGGTGGAATTCCTGGTGTAGCGGTG  
GAATGCGTAGATATCGGGAGGAACACCAGTGGCGAAGGCGACCTACTGGGCACCAACTGACGCTGAGGCTCGAAAGCATG  
GGTAG

>ASV:398:Family:Lachnospiraceae

TACGTAGGGGGCAAGCGTTATCCGGATTTACTGGGTGTAAAGGGAGCGTAGACGGACTGGCAAGTCTGATGTGAAAACCC  
GGGGCTCAACCCCGGACTGCATTGGAACTGTCACTAGAGTGTGCGAGGGTAAGTGGAATTCCTAGTGTAGCGGTG  
AAATGCGTAGATATTAGGAGGAACACCAGTGGCGAAGGCGGCTTACTGGACGATAACTGACGTTGAGGCTCGAAAGCGTG  
GGAG

>ASV:399:Genus:Prevotella\_2

TACGGAAGGTCCAGGCGTTATCCGGATTTATTGGGTTTAAAGGGAGCGTAGGCCGTTTGGTAAGCGTGTGTGAAATGTG  
GGGGCTCAACCTGGGCTTGCAGCGGAACTGCCAGACTTGTAGTGCAGGAAAGTAGGCGGAATTCCTGCTGTAGCGGTG  
AAATGCTTAGATATGACGAAGAACTCCGATTGCGAAGGCGGCTGCTGTAGCGCAACTGACGCTGAAGTCTCGAAAGCGTG  
GGTAT

>ASV:400:Genus:Christensenellaceae\_R-7\_group

TACGTAGGGGGCAAGCGTTGTCCGGAATAATTGGGCGTAAAGGGCGCTAGGCCGCTCGGTAAGTCTGGAGTAAAAGTCC  
TGCTTTTAAAGGTGGGAATTGCTTTGGATACTGTGGGCTTGTAGTACAGGAGAGGTTAGTGGAATTCCTAGTGTAGCGGTG  
AAATGCGTAGAGATTGGGAGGAACACCAGTGGCGAAGGCGACTAACTGGACTGTAAGTACGCTGAGGCGGAAAGTGTG  
GGGAG

>ASV:401:Species:goldsteinii

TACGGAGGATGCGAGCGTTATCCGGATTTATTGGGTTTAAAGGGTGCCTAGGTGGTTAATTAAGTACGCGGTGAAAATTT  
GTGGCTCAACCCATAAATTGCGGTTGAAACTGGTTGACTTGTAGTATATTTGAGGTAGGCGGAATGCGTGGTGTAGCGGTG  
AAATGCATAGATATCAGCAGAACTCCGATTGCGAAGGCGGCTTACTAACTATAACTGACACTGAAGCACGAAAGCGTG  
GGGAT

>ASV:402:Species:lenta

TACGTAGGGAGCGAGCGTTATCCGGATTTATTGGGCGTAAAGAGCGCTAGGCGGCTCTCAAGCGGATCTCTAATCCG  
AGGGCTCAACCCCGGCGGATCCCGAACTGGGAGGCTCGAGTTCGGTAGAGGCGGCGGAATTCCTGGTGTAGCGGTGG  
AATGCGCAGATATCGGGAAGAACACCAGTGGCGAAGGCGGCTGCTGGGCCCAACTGACGCTGAGGCGGAAAGCTAGG  
GGAG

>ASV:403:Species:dentium/moukalabense

TACGTAGGGTGCACAGCGTTATCCGGAATTTATTGGGCGTAAAGGGCTCGTAGGCGGTTCTGTCGCTCCGGTGTGAAAGCCC  
ATCGCTTAACGGTGGTCTGCGCCGGTACGGGCGGCTGGAGTGCAGTGGGAGACTGGAATTCCTGGTGTAAACGGTG  
GAATGTGTAGATATCGGGAAGAACACCAGTGGCGAAGGCGGCTCTCTGGGCCCTCACTGACGCTGAGGAGCGAAAGCGTG  
GGGAG

>ASV:404:Genus:Mannheimia

TACGGAGGGTGCAGCGTTAATCGGAATAACTGGGCGTAAAGGGCACGAGGCGGACTTTTAAAGTGAAGTGTGAAAGCCC  
CGGGCTTAACCTGGGAATTGCATTTAGACTGGGAGTCTAGAGTACTTTAGGAGGGGTAGAATTCACGCTGTAGCGGTG  
AAATGCGTAGAGATGTGGAGGAATACCGAAGGCGAAGGCGGCTTGGGAATGTACTGACGCTCATGTGCGAAAGCGTG  
GGGAG

>ASV:405:Genus:Ruminiclostridium\_9

TACGTAGGTGGCAAGCGTTATCCGGATTTACTGGGTGTAAAGGGCGTGTAGGCGGATTGCAAGTCAAGTGTGAAAACCA  
CGGGCTCAACCTGTGGCCTGCATTTGAAACTGTAGTCTTGTAGTACTGGAGAGGCGAGCGGAATTCCTAGTGTAGCGGTG  
AAATGCGTAGATATTAGGAGGAACACCAGTGGCGAAGGCGGCTGCTGGACAGCAACTGACGCTGAGGCGGAAAGCGTG  
GGGAG

>ASV:406:Genus:Rikenellaceae\_RC9\_gut\_group

TACGGGGGATGCGAGCGTTATCCGGATTTATTGGGTTTAAAGGGTGCCTAGGCGGCAAGGTAAGTACGCGGTGAAAGACC  
AGGGCTCAACTCTGGAAGTCCGTTGATACTGTCTGGCTAGAATGATTCCTGGCTGGGAGGAATGAGTAGTGTAGCGGTG

AAATGCATAGATATTACTCAGAACACCGATTGCGAAGGCATCTCACGAGGAGTTCATTGACGCTGAGGCACGAAAGCGTG  
GGAT  
>ASV:407:Genus:Faecalibacterium  
AACGTAGGTCACAAGCGTTGTCCGGAATTACTGGGTGTAAGGGAGCGCAGGCGGGAAGACAAGTTGGAAGTAAAATCTA  
TGGGCTTAACCCATAAACTGCTTTCAAACCTGTTTTCTTGAGTAGTGCAGAGGTAGCGGAATCCCGGTGTAGCGGTG  
GAATGCGTAGATATCGGGAGGAACACCACTGCGAAGGCGGCTACTGGGCACCAACTGACGCTGAGGCTCGAAAGTGTG  
GGTAG  
>ASV:408:Class:Clostridia  
TACGTAGGGAGCGAGCGTTGTCCGGAATTACTGGGCGTAAAGGGTGCCTAGGCGGTCTGAAAAGTCCGATGTGAAATCCC  
CGTGCTTAACATGGGAGCTGCATTGAAACTTTCCGACTTGAGTGTCCGAGAGGTAAGCGGAATCCCGGTGTAGCGGTG  
AAATGCGTAGATATCGGGAGGAACACCACTGCGAAGGCGGCTACTGGACGACAACTGACGCTGAGGCACGAAAGCGTG  
GGAG  
>ASV:409:Genus:Desulfovibrio  
TACGGAGGGTGCAAGCGTTAATCGGAATCACTGGGCGTAAAGCGCACGTAGGCTGTTATGTAAGTCAAGGGTAAAATCCC  
ACGGCTCAACCGTGAAGTCCCTTGATACTGCACGACTTGAATCCGGGAGAGGGTGGCGGAATCCAGGTGTAGGAGTG  
AAATCCGTAGATATCTGGAGGAACATCAGTGGCGAAGGCGGCTACTGGACGACAACTGACGCTGAGGTGCGAAAGCGTG  
GGAG  
>ASV:410:Species:massiliensis  
TACGTAGGTGGCAAGCGTTATCCGATTTACTGGGTGTAAGGGCGTGTAGGCGGGACTGCAAGTCAAGTGTGAAAACCTA  
TGGGCTCAACCCATAGCTGCATTTGAAACTGTAGTCTTGAGTGTCCGAGAGGCAATCGGAATCCGTGTGTAGCGGTG  
AAATGCGTAGATATACGGAGGAACACCACTGCGAAGGCGGATTGCTGGACGATAACTGACGCTGAGGCAGGAAAGCGTG  
GGAG  
>ASV:411:Genus:Ruminococcus\_1  
TACGTAGGGAGCGAGCGTTGTCCGGAATTACTGGGTGTAAGGGAGCGTAGGCGGGACGGCAAGTCAAGTGTGAAAACCTA  
TGGGCTCAACCCATAGACTGCATTTGAAACTGTTGTTCTTGAGTGTAGGTAAGCGGAATCCCGGTGTAGCGGTG  
AAATGCGTAGAGATCAGGAGGAACATCGTGGCGAAGGCGGCTACTGGGCTTTACTGACGCTGAGGCTCGAAAGCGTG  
GGAG  
>ASV:412:Genus:Parasutterella  
TACGTAGGGTGCAGCGTTAATCGGAATTACTGGGCGTAAAGGGTGTGAGGCGGCTGAGTAAGACAGATGTGAAATCCC  
CGGGCTTAACCTGGGAACCGCATATGTGACTGCTTGCTAGAGTGCCTGAGAGGGAGTGAATCCACGTGTAGCAGTG  
AAATGCGTAGATATGTGGAAGAACACCGATGGCGAAGGCAGCTCTCTGGGACGCAACTGACGCTCATACGAAAGCGTG  
GGAG  
>ASV:413:Genus:Alistipes  
TACGGAGGATTCAAGCGTTATCCGATTTATTGGGTTAAAGGGTGCCTAGGCGGTTTGATAAGTTAGAGGTGAAATTTCC  
GGGGCTCAACCTGAACTGCCTTAATACTGTTGAGCTAGAGAGTAGTTGCGGTAGGCGGAATGTATGGTGTAGCGGTG  
AAATGCTTAGAGATCATACAGAACACCGATTGCGAAGGCAGTTTACCAACTATATCTGACGTTGAGGCACGAAAGCGTG  
GGAG  
>ASV:414:Species:caccae  
TACGTAGGGGGCAAGCGTTATCCGGAATTACTGGGTGTAAGGGTGCCTAGGTTGGCATGGTAAGTCAAGTCAAGGCCC  
GGGGCTTAACCCGGGACTGCTTTTGAACCTGTCATGCTGGAGTGCAGGAGAGGTAAGCGGAATCCCTAGTGTAGCGGTG  
AAATGCGTAGATATTAGGAGGAACACCACTGCGAAGGCGGCTACTGGACTGTCACTGACACTGATGCACGAAAGCGTG  
GGAG  
>ASV:415:Family:Family\_XIII  
TACGTAGGGGGCGAGCGTTATCCGGAATTATTGGGCGTAAAGAGTACGTAGGCGGTTTTTAAAGCGAGGGGTATAAGGCA  
GCGGCTTAACCTGCTGTTGGCCCTCGAACTGGAGACTTGAAGTGTCCGAGAGGAAAGCGGAATCCCTAGTGTAGCGGTG  
AATGCGTAGAGATTAGGAGGAACACCACTGCGAAGGCGGCTTTCTGGACGACAACTGACGCTGAGGTACGAAAGCGTG  
GGAG  
>ASV:416:Family:Lachnospiraceae  
TACGTATGGGCAAGCGTTATCCGATTTACTGGGTGTAAGGGAGCGTAGGCGGTAAGACAAGTCAAGTCAAGGCT  
GGGGCTCAACCTGGGACTGCTTTTGAACCTGCTAACTAGAGTGCAGGAGAGGTAAGTGAATCCCTAGTGTAGCGGTG  
AAATGCGTAGATATTAGGAGGAACACCACTGCGAAGGCGGCTACTGGACTGTAACGACGCTGAGGCTCGAAAGCGTG  
GGAG  
>ASV:417:Genus:Erysipelatoclostridium  
TACGTAGGTGGCAAGCGTTATCCGGAATTATTGGGCGTAAAGAGGGAGCAGGCGGACGCAAGGGTCTGTGGTAAAAGACT  
GAAGCTTAACCTCAGTAAGCCATAGAAACCGGGCAGCTAGAGTGCAGGAGAGGATCGTGAATCCATGTGTAGCGGTG  
AATGCGTAGATATATGAGGAACACCACTGCGAAGGCGGACTCTGGCTGCAACTGACGCTCAGTCCGAAAGCGGTG  
GGAG  
>ASV:418:Order:Obscuribacterales  
GACGTAGGATGCGAGCGTTGTCCGATTTATTGGGCGTAAAGAGTTCGTAGGTGGTTTTGTTAAGTTTGGTGTAAAGATC  
GGGGCTCAACCTGGGACTGCACTGAATACTGGCAGACTCGAGTGTGGTAGAGGCTAGTGAATCCAGTGTAGCGGTG  
AAATGCGTAGATATTGGGAAGAACACCGGTGGCGTAGGCGACTAGCTGGGCCATAACTGACGCTGAGGAACGAAAGCCAG  
GGAG  
>ASV:419:Species:boliviensis/hamiltonii/hydrothermalis/johnsoniae/meridiana/stevensii/venusta  
TACGGAGGGTGCAGCGTTAATCGGAATTACTGGGCGTAAAGCGCGGTAGGTGGCTTGATAAGCCGGTTGTGAAAGCCC  
CGGGCTCAACCTGGGAACCGCATCCGAACTGTCAAGCTAGAGTGCAGGAGAGGAAGGTAGAATCCCGGTGTAGCGGTG  
AAATGCGTAGAGATCGGGAGGAATACCACTGCGAAGGCGGCTTCTGGACTGACACTGACACTGAGGTGCGAAAGCGTG  
GGTAG  
>ASV:420:Species:diphtheriae/vitaeruminis

TACGTAGGGTGCAGCGTTGTCCGGAATTACTGGGCGTAAAGAGCTCGTAGGTGGTTTGTCCGCTCGTCTGTGAAATTC  
GGGGCTAACTTCGGGCGTGCAGGCGATACGGGCATAACTTGAAGTGTGTAGGGGAGACTGGAATTCCTGGTGTAGCGGT  
GGAATGCGCAGATATCAGGAGGAACACCGATGGCGAAGGCAGGTCTCTGGGCAGTAACTGACGCTGAGGAGCGAAAGCAT  
GGGA

>ASV:421:Genus:Parabacteroides

TACGGAGGATCCGAGCGTTATCCGGATTTATTGGGTTTAAAGGGTGCCTAGGCGGCCTTTAAGTCAGCGGTGAAAAGTCT  
GTGGCTCAACCATAGAAATTGCCGTTGAAACTGGGGGCTTGAAGTATGTTTGAAGGCAGGCGGAATGCGTGGTGTAGCGGTG  
AAATGCGATAGATATCACGCAGAACTCCGATTGCGAAGGCAGCTTACTAAACCATAACTGACACTGAAGCACGAAAGCGTG  
GGAT

>ASV:422:Order: Mollicutes\_RF39

TACGTAGGGGGCAAGCGTTATCCGGATTTATTGGGCGTAAAGCGTGTGTAGGCGGTTTGTAAAGTTAAGATTAAGGCCT  
GGGGCTCAACTCCAGTTCGCTTTAAAACTGGCAGACTAGAGTACGGTAGAGGCAACCGGAATTTCTAGTGTAGCGGTGA  
AATGCGTAGATATTAGAAGGAACACCAAGTGGCGAAAGCGGTTTGTCTGGGCCGTTACTGACGCTGAGGCACGAAAGCGTGG  
GGAGC

>ASV:423:Family: Family\_XIII

TACGTAGGGGGCGAGCGTTATCCGGAATTATTGGGCGTAAAGAGTGCCTAGGTGGTTACCTAAGCGCAGGGTCTAAGGCA  
ATGGCTCAACCATTTGTCGCTTGAAGTGGCTACTTGAAGTGCAGGAGAGAAAGCGGAATTCCTAGTGTAGCGGTGA  
AATGCGTAGATATTAGGAGGAACACCAAGTGGCGAAGGCAGGCTTCTGGACTGTTACTGACACTGAGGCACGAAAGCGTGG  
GGAGC

>ASV:424:Family: Lachnospiraceae

TACGTATGGGGCAAGCGTTATCCGGATTTACTGGGTGTAAAGGGAGCGTAGGCGGTATGGCAAGTCAGAAGTAAAGGCCT  
GGGGCTCAACCCCGAATTGCTTTTGAAGTGTCAAACTAGAGTGTGGAGGGGTAAAGCGGAATTCCTAGTGTAGCGGTG  
AAATGCGTAGATATTAGGAGGAACACCGGTGGCGAAGGCAGGCTTACTGGACGACCACTGACGCTGAGGCTCGAAAGCGTG  
GGAG

>ASV:425:Genus: Faecalibacterium

AACGTAGGTCACAAGCGTTGTCCGGAATTACTGGGTGTAAAGGGAGCGCAGGCGGGAAGACAAGTTGGAAGTAAATCTA  
TGGGCTCAACCATAAACTGCTTTCAAAGTGTCTTCTTGAAGTGTAGAGGTAGGCGGAATTCCTGGTGTAGCGGTG  
GAATGCGTAGATATCGGGAGGAACACCAAGTGGCGAAGGCAGGCTTACTGGGCACCAACTGACGCTGAGGCTCGAAAGTGTG  
GGTAG

>ASV:426:Species: colihominis

TACGTAGGGAGCAAGCGTTGTCCGGAATTACTGGGTGTAAAGGGAGCGTAGGCGGGATGGCAAGTAGAATGTTAAATCCA  
TCGGCTCAACCGGTGGCTGCGTTCTAAAGTGGCTTCTTGAAGTGTAGAGGTAGGCGGGAATTCCTAGTGTAGCGGTGA  
AATGCGTAGATATTAGGAGGAACACCAAGTGGCGAAGGCAGGCTTACTGGGCTTAACTGACGCTGAGGCTCGAAAGCGTGG  
GGAGC

>ASV:427:Genus: Erysipelatoclostridium

TACGTAGGTGGCGAGCGTTATCCGGAATCATTGGGCGTAAAGGGAGCGCAGGCGGAGTGCAGGTCTGCGGTGAAAGACC  
GGAGCTAAACTTCGGTAAGCGTTGGAAACCGCACAGCTAGAGAGCATCAGAGGATCGCGGAATTCCTAGTGTAGCGGTGA  
AATGCGTAGATATATGGAGGAACACCAAGTGGCGAAGGCAGGCTTACTGGGCTGACGCTCAGTCCGAAAGCGTGG  
GGAGC

>ASV:428:Genus: Holdemanelle

TACGTAGGTGGCGAGCGTTATCCGGAATGATTGGGCGTAAAGGGTGCCTAGGTGGCAGATCAAGTCTGGAGTAAAGGTA  
TGGGCTAAACCCGTAACCTTGGCTTGGAAACTGATCAGCTAGAGAACAGAAAGAGGACGGCGGAATTCCTAGTGTAGCGGTGA  
AATGCGTAGATATATGGAGGAACACCGGTGGCGAAGGCAGGCTTACTGGGCTGAGCTGACACTGAAGCACGAAAGCGTG  
GGAG

>ASV:429:Genus: Ruminococcaceae\_UCG-005

TACGTAGGTGGCAAGCGTTGTCCGATTTACTGGGTGTAAAGGGCGTGTAGGCGGAGATGCAAGTCAGATGTGAAATCCC  
CGGGCTAAACCCGGGACTGCTTGGAAACTGATCCTTGAAGTGTAGAGAGGCGGCGGAATTCCTAGTGTAGCGGTG  
AAATGCGTAGATATTAGGAGGAACACCAAGTGGCGAAGGCAGGCTTACTGGACGACAACTGACGCTGAGGCGGAAAGCGTG  
GGAG

>ASV:430:Genus: Ruminococcaceae\_NK4A214\_group

TACGTAGGTGGCAAGCGTTGTCCGATTTACTGGGTGTAAAGGGCGCGCAGGCGGAGAGCAAGTCAGATGTGAAATCTA  
TGGGCTAAACCCATAAACTGCAATTTGAAACTGTTTTTCTTGAAGTGTAGAGAGGCAAGCGGAATTCCTAGTGTAGCGGTG  
AAATGCGTAGATATTAGGAGGAACACCAAGTGGCGAAGGCAGGCTTACTGGACATTAAGTACGCTGAGGCGGAAAGCGTG  
GGAG

>ASV:431:Family: Lachnospiraceae

TACGTATGGTGAAGCGTTATCCGGATTTACTGGGTGTAAAGGGAGCGTAGACGGATGGCAAGTCTGATGTGAAAACCC  
GGGGCTCAACCCGGGACTGCAATTTGAAACTGTTTCTTGAAGTGTAGAGAGGTAAGTGGAAATTCCTAGTGTAGCGGTG  
AAATGCGTAGATATTAGGAGGAACACCAAGTGGCGAAGGCAGGCTTACTGGACAGTAACTGACGCTGAGGCTCGAAAGCGTG  
GGAG

>ASV:432:Genus: Faecalibacterium

AACGTAGGTCACAAGCGTTGTCCGGAATTACTGGGTGTAAAGGGAGCGCAGGCGGAGAAACAAGTTGGAAGTAAATCTA  
TGGGCTCAACCCATGAAGTGTCTTTCAAAGTGTCTTCTTGAAGTGTAGAGAGGTAAGTGGAAATTCCTAGTGTAGCGGTG  
GAATGCGTAGATATCGGGAGGAACACCAAGTGGCGAAGGCAGGCTTACTGGGCACCAACTGACGCTGAGGCTCGAAAGTGTG  
GGTAG

>ASV:433:Genus: Bacteroides

TACGGAGGATGCGAGCGTTATCCGGATTTATTGGGTTTAAAGGGAGCGCAGACGGGGCTTTAAGTCAGCTGTGAAATTTT  
CCGGCTCAACCCGGGAACTGCAAGTGTACTGGGCTCCTTGAAGTGTAGGCTGAGGCGGCGGAATTCCTGGTGTAGCGGTG  
AAATGCTTAGATATCAGGAAGAACCCGATTGCGAAGGCAGCTGCCAGACCGCAACTGACGTTTCTAGTGTGAAAGTGGC



GGTAT

>ASV:434:Genus:Erysipelatoclostridium

TACGTAGGTGGCGAGCGTTATCCGGAATCATTGGGCGTAAAGAGGGAGCAGGCGGAGTGCAGGTCTGCGGTGAAAAGCCC  
GAAGCTAAACTTCGGTAAGCCGTGAAACCGCACAGCTAGAGAGCATCAGAGGATCGCGGAATTCATGTGTAGCGGTGA  
AATGCGTAGATATATGGAGGAACACCAGTGGCGAAGGCGGGTCTGGGGTGCAGCTGACGCTCAGTCCGAAAGCGTGG  
GGAG

>ASV:435:Genus:Oscillibacter

TACGTAGGTGGCAAGCGTTGTCCGGATTTACTGGGTGTAAGGGCGGTAGCCGGGCTGATAAGTCAGATGTGAAATCTG  
GAGGCTCAACCTCCAACTGCATTTGAACTGTCGGTCTTGTAGTATCGGAGAGGTAACCGGAATTCCTAGTGTAGCGGTG  
AAATGCGTAGATATTAGGAAGAACCAGTGGCGAAGGCGGGTACTGGACGACAACGACGGTGAGGCGGAAAGCGTG  
GGGAG

>ASV:436:Species:anaerobia

TACGTATGGGGCGAGCGTTATCCGGATTTACTGGGCGTAAAGCGCGTAGGCGGAGCGCTAAGCGGGACCTCTAACCCG  
AGGGCTCAACCCCGGCGGGTCCCAGAACTGGCGCTCTCAGTGCAGTGGGAGAGCGGAATTCCTGGTGTAGCGGTGG  
AATGCGCAGATATCGGGAAGAACCAGCGGCGAAGGCGAGCTCTCTGGGCCGAAACTGACGCTGAGGCGGAAAGCTGG  
GGAG

>ASV:437:Family:Ruminococcaceae

TACGTAGGGAGCGAGCGTTGTCCGGATTTACTGGGTGTAAGGGTGCCTAGGCGGGATGGCAAGTCAGATGTGAAATACC  
GGGGCTTAACCCCGGGCTGCATTTGAACTGTCGTTCTTGTAGTGAAGTAGAGGCGAGCGGAATTCCTAGTGTAGCGGTG  
AAATGCGTAGATATTAGGAGGAACACCAGTGGCGAAGGCGGCTCTCTGGGCTTAACTGACGCTGAGGCACGAAAGCATG  
GGGAG

>ASV:438:Family:Lachnospiraceae

TACGTAGGGGGCAAGCGTTATCCGGATTTACTGGGTGTAAGGGTGCCTAGGTTGGCAAGGCAAGTCAGATGTGAAAGCCC  
GGGGCTCAACCCCGGTATTGCATTTGAACTGTTTGTAGTGCAGGAGAGGTAAGTGGAAATTCCTAGTGTAGCGGTG  
AAATGCGTAGATATTAGGAGGAACACCAGTGGCGAAGGCGGCTTACTGGACTGTAACGACACTGAGGCACGAAAGCGTG  
GGGAG

>ASV:439:Genus:Butyricimonas

TACGGGGGATGCGAGCGTTATCCGGATTTATTGGGTTAAAGGGCGCGTAGGCGGGAGTCAAGTCAGCGGTAAAAGACT  
GCAGCTAAACTGTAGCACGCCGTTGAACTGGCGCCCTCGAGACGAGACGAGGGAGGCGGAACAAGTGAAGTAGCGGTGA  
AATGCATAGATATCACTTGGAAACCCGATAGCGAAGGCGAGCTTCCCAGGCTCGATCTGACGCTGATGCGCGAGAGCGTG  
GTAGC

>ASV:440:Family:Muribaculaceae

TACGGAGGATGCGAGCGTTATCCGGATTTATTGGGTTAAAGGGTGCAGGCGGATTTTCAAGTCAGCGGTAAAATTTG  
GGGGCTCAACCCCATCGAGCCGTTGAACTGGAGGTCTAGAGTGAGCGAGAAGTATGCGGAATGCGTGGTGTAGCGGTGA  
AATGCATAGATATCACGCAAACTCCGATTGCGAAGGCGAGCATAACCGGTGCTCAACTGACGCTCATGCACGAAAGCGTG  
GTATC

>ASV:441:Genus:Parasutterella

TACGTAGGGTGAAGCGTTAATCGGAATTTACTGGGCGTAAAGGGTGCAGGCGGTTGAGTAAGACAGATGTGAAATCCC  
CGAGCTTAACCGGGAATGGCATATGTGACTGCTCGACTAGAGTGTGTGAGAGGAGGTGGAATTCACGCTGTAGCAGTG  
AAATGCGTAGATATGTTGGAAGAACCAGTGGCGAAGGCGAGCTTCTGGGACATAACTGACGCTCAGGCACGAAAGCGTG  
GGGAG

>ASV:442:Species:bacterium

TACGTATGGTGAAGCGTTATCCGGATTTACTGGGTGTAAGGGAGCGCAGGCGGTCTGGCAAGTCTGATGTGAAAATCC  
GGGGCTCAACTCCGGAAGTGCATTGAACTGTCAGACTAGAGTGTGCGGAGAGGTAAGTGGAAATTCCTAGTGTAGCGGTG  
AAATGCGTAGATATTAGGAGGAACACCAGTGGCGAAGGCGGCTTACTGGACGATAACTGACGCTGAGGCTCGAAAGCGTG  
GGGAG

>ASV:443:Genus:Flavonifractor

TACGTAGGTGGCAAGCGTTATCCGGATTTATTGGGTGTAAGGGCGGTAGGCGGGATTGCAAGTCAGATGTGAAAAGTGG  
GGGGCTCAACCTCCAGCCTGCATTTGAACTGTAGTTCTTGTAGTGTGCGGAGAGGCAATCGGAATTCCTGTGTAGCGGTG  
AAATGCGTAGATATACGGAGGAACACCAGTGGCGAAGGCGGATTGCTGGACGATAACTGACGCTGAGGCGGAAAGCGTG  
GGGAG

>ASV:444:Genus:Bifidobacterium

TACGTAGGGTGAAGCGTTATCCGGAATTTATTGGGCGTAAAGGGCTCGTAGGCGGTTCTGCGCTCCGGTGTGAAAAGTCC  
ATCGCTTAACCGTGGATCTGCGCCGGGTACGGGCGGGCTGGAGTGCAGTGGAGGAGACTGGAATTCCTGGTGTAAACGGTG  
GAATGTGTAGATATCGGGAAGAACCAGTGGCGAAGGCGAGTCTCTGGGCCGCTACTGACGCTGAGGAGCGAAAGCGTG  
GGGAG

>ASV:445:Genus:Prevotella\_9

TACGGAAGGTCCGGCGTTATCCGGATTTATTGGGTTAAAGGGAGCGTAGGCGGAGATTAAGCGTGTGTGAAATGTA  
GATGCTCAACGTCTGACTGCAGCGGAACTGTTTTCTTGTAGTACGCACAAAGTGGGCGGAATTCGTGGTGTAGCGGTG  
AAATGCTTAGATATCACGAAGAACCAGTGGCGAAGGCGAGTCTACTGGAGCGCAACTGACGCTGAAGCTCGAAAGTGGC  
GGTAT

>ASV:446:Genus:Bacteroides

TACGGAGGATCCGAGCGTTATCCGGATTTATTGGGTTAAAGGGAGCGTAGGTTGATTGTTAAGTCAGTTGTGAAAAGTTT  
GCGGGCTCAACCGTAAATTTGAGTTGAACTGGCAGTCTTGTAGTACAGTAGAGGTGGGCGGAATTCGTGGTGTAGCGGTG  
AAATGCTTAGATATCACGAAGAACCAGTGGCGAAGGCGAGTCTACTGGACTGGTAACTGACACTGAGGCTCGAAAGTGT  
GGGTA

>ASV:447:Genus:Subdoligranulum

AACGTAGGGTGAAGCGTTGTCCGGAATTTACTGGGTGTAAGGGAGCGCAGGCGGACCGCAAGTTGGAAGTAAAACCA

TGGGCTCAACCCGTGAATTGCTTTCAAACCTGCTGGCCTTGTAGTAGTGCAGAGGTAGGTGGAATTCCTGGTGTAGCGGTG  
GAATGCGTAGATATCGGGAGGAACACCAGTGGCGAAGGCGACCTACTGGGCAACACTGACGCTGAGGCTCGAAAGCATG  
GGTAG

>ASV:448:Family:Ruminococcaceae

TACGTAGGGAGCGAGCGTTGTCCGGATTTACTGGGTGTAAGGGTGCCTAGGCGGGATGGCAAGTCAGATGTGAAATACC  
GGGGCTTAACCCGGGCTGCATTTGAAACTGCTGTTCTTGTAGTGAAGTAGAGGCGAGGCGGAATTCCTAGTGTAGCGGTG  
AAATGCGTAGATATTAGGAGGAACACCAGTGGCGAAGGCGGCTGCTGGGCTTTAACTGACGCTGAGGCACGAAAGCATG  
GGGAG

>ASV:449:Species:desmolans

TACGTAGGGAGCAAGCGTTATCCGGATTTACTGGGTGTAAGGGGCGCGAGGCGGGCCGGCAAGTTGGGAGTAAATCCC  
GGGGCTTAACCCGGAACTGCTTTCAAACCTGCTGTTCTTGTAGTGTAGGAGGCGAGGCGGAATTCCTGTGTAGCGGTG  
AAATGCGTAGATATACGGAGGAACACCAGTGGCGAAGGCGGCTGCTGGACATTAACGACGCTGAGGCGCAAAAGCGTG  
GGGAG

>ASV:450:Genus:Cloacibacillus

TACGTAGGGGCGAGCGTTGTCCGGAATTTACTGGGCGTAAAGCGCACGAGGCGGACCTGTAAGTCTGTCTGCAAAAGGCG  
GAGGCTCAACCTTCGTTCCACGATAGATACTGCGGGTCTAGAGTATGTGAGAGGGAAGTGAATTCCTGGTGTAGCGGTG  
AAATGCGTAGATATCGGGAGGAACACCAGTGGCGAAGGCGGCTTCTGGCACACAACGACGCTCATGTGCAAAAGCCAG  
GGCAG

>ASV:451:Family:Ruminococcaceae

TACGTAGGGAGCGAGCGTTGTCCGGATTTACTGGGTGTAAGGGTGCCTAGGCGGGTGTCAAGTCAGATGTGAAATACC  
GGGGCTCAACCCGGGCTGCATTTGAAACTGATGTTCTTGTAGTGAAGTAGAGGCGAGGCGGAATTCCTAGTGTAGCGGTG  
AAATGCGTAGATATTAGGAGGAACACCAGTGGCGAAGGCGGCTGCTGGGCTTTAACTGACGCTGAGGCACGAAAGCATG  
GGGAG

>ASV:452:Family:Ruminococcaceae

TACGTAGGGAGCGAGCGTTGTCCGGAATTTACTGGGTGTAAGGGAGCGTAGGCGGGAAAGCAAGTTGGAAGTAAATGCA  
TGGGCTTAACCCATGAGCTGCTTTCAAACCTGTTTTCTTGTAGTGAAGTAGAGGCGAGGCGGAATTCCTAGTGTAGCGGTG  
AAATGCGTAGATATTAGGAGGAACACCAGTGGCGAAGGCGGCTGCTGGGCTTTAACTGACGCTGAGGCTCGAAAGCGTG  
GGTAG

>ASV:453:Genus:Sellimonas

TACGTATGGTCAAGCGTTATCCGGATTTACTGGGTGTAAGGGAGCGTAGACGGAGAGGCAAGTCTGAAGTAAAGCCC  
GGGGCTCAACCCGGGACTGCTTTGAAACTGCAGTTCTAGAGTGCCGGAGAGGTAAGCGGAATTCCTAGTGTAGCGGTG  
AAATGCGTAGATATTAGGAGGAACACCAGTGGCGAAGGCGGCTTACTGGACGGTGACTGACGTTGAGGCTCGAAAGCGTG  
GGGAG

>ASV:454:Genus:UC5-1-2E3

TACGTAGGGGCAAGCGTTATCCGGATTTACTGGGTGTAAGGGAGCGTAGACGGCTGTGCAAGTCTGGAGTAAAGCCC  
GGGGCTCAACCCGGGACTGCTTTGAAACTGTACGGCTGGAGTGTGGAGAGGCAAGCGGAATTCCTAGTGTAGCGGTG  
AAATGCGTAGATATTAGGAGGAACACCAGTGGCGAAGGCGGCTTCTGGACAGTAACTGACGTTGAGGCTCGAAAGCGTG  
GGGAG

>ASV:455:Species:johnsonii

TACGTAGGTGGCAAGCGTTGTCCGGATTTATTGGGCGTAAAGCGAGTGCAGGCGGTTCAATAAGTCTGATGTGAAAGCCT  
TCGGCTCAACCCGGAAGTGCATCAGAACTGTTGAACCTTGTAGTGCAGAAAGAGGAGTGAAGTCCATGTGTAGCGGTG  
GAATGCGTAGATATTGGAAGAACACCAGTGGCGAAGGCGGCTCTCTGGTCTGCAACTGACGCTGAGGCTCGAAAGCATG  
GGTAG

>ASV:456:Genus:Alistipes

TACGGAGGATCCGAGCGTTATCCGGATTTATTGGGTTAAAGGGTGCCTAGGCGGTTTGATAAGTTAGAGGTGAAAGCTC  
GATGCTCAACATCGAAATTCCTCTGATACTGCAGACTAGAGTATAGTTGCCGAAGGCGGAATGTGTGGTGTAGCGGTG  
AAATGCTTAGAGATCACACAGAACACCAGTGGCGAAGGCGAGCTTTCCAAGCTATTACTGACGCTGAGGCACGAAAGCGTG  
GGTAG

>ASV:457:Genus:Ruminococcaceae\_UCG-014

TACGTAGGGAGCAAGCGTTATCCGGATTTATTGGGTGTAAGGGTGCCTAGACGGGAAGGTAAGTTAGTTGTGAAATCCC  
TCGGCTCAACTGAGGAACTGCGACTAAAACCTGCTTTTCTTGTAGTACTGGAGAGGAAAGTGAATTCCTAGTGTAGCGGTG  
AAATGCGTAGATATTAGGAGGAACACCAGTGGCGAAGGCGACTTTCTGGACAGTAACTGACGTTGAGGCACGAAAGTGTG  
GGGAG

>ASV:458:Genus:Subdoligranulum

AACGTAGGGTGAAGCGTTGTCCGGAATTTACTGGGTGTAAGGGAGCGCAGGCGGGAAGGCAAGTTGGAAGTAAAACCA  
TGGGCTCAACCCATGAATTCCTTTCAAACCTGTTTTCTTGTAGTGTAGGAGGCGAGGCGGAATTCCTGGTGTAGCGGTG  
GAATGCTTAGATATCGGGAGGAACACCAGTGGCGAAGGCGGCTTACTGGGCAACACTGACGCTGAGGCTCGAAAGCATG  
GGTAG

>ASV:459:Species:clarus

TACGGAGGATCCGAGCGTTATCCGGATTTATTGGGTTAAAGGGAGCGTAGGCGGGTATTAAGTCAGTTGTGAAAGTTT  
CGGGCTCAACCGTAAATTCAGTTGATACTGGTATCCTTGTAGTGCAGCAGAGGTGGGCGGAATTCCTGGTGTAGCGGTG  
AAATGCTTAGATATCACGAAGAACTCCGATTGCGAAGGCGAGCTCACTGGAGTGAACCTGACGCTGATGCTCGAAAGTGTG  
GGTAT

>ASV:460:Genus:Prevotella\_9

TACGGAAAGTCCGGCGTTATCCGGATTTATTGGGTTAAAGGGAGCGTAGGCGGGAGATTAAGCGTGTGTGAAATGTA  
GAGGCTCAACCTCTGCACTGCAGCGCAACTGGTCTTCTTGTAGTACGCACAACGTTGGGCGGAATTCCTGGTGTAGCGGTG  
AAATGCTTAGATATCACGAAGAACTCCGATTGCGAAGGCGAGCTCACGGGAGCGCAACTGACGCTGAAGCTCGAAAGTGTG  
GGTAT

>ASV:461:Family:Lachnospiraceae  
TACGTAGGGGGCAAGCGTTATCCGGATTTACTGGGTGTAAAGGGAGTGTAGACGGCATGGCAAGCCAGATGTGAAAGCCC  
GGGGCTCAACCCCGGACTGCATTTGAACTGTCAGGCTAGAGTGTGCGAGAGGAAAGCGGAATTCCTAGTGTAGCGGTG  
AAATGCGTAGATATTAGGAGGAACACCAGTGGCGAAGGCGGCTTTCTGGACGATGACTGACGTTGAGGCTCGAAAGCGTG  
GGGAG

>ASV:462:Genus:Subdoligranulum  
AACGTAGGGTGAAGCGTTGTCCGGAATTACTGGGTGTAAAGGGAGCGCAGGCGGACCAGGCAAGTTGGAAGTAAAACCTA  
TGGGCTCAACCCATAAATTGCTTTCAAACCTGCTGGCTTGGAGTAGTGCAGAGGTAGGTGGAATTCCTAGTGTAGCGGTG  
GAATGCGTAGATATCGGGAGGAACACCAGTGGCGAAGGCGACCTACTGGGCATCAACTGACGCTGAGGCTCGAAAGCATG  
GGTAG

>ASV:463:Genus:Desulfovibrio  
TACGGAGGGTGAAGCGTTAATCCGGAATTACTGGGCGTAAAGCGCACGCTAGGCTGTTGTGTAAGTCAGGGGTGAAATCCC  
ACGGCTCAACCCGGAATTGCTTTGATACTGCACGACTTGAATCCGGGAGAGGGTGGCGGAATTCAGGTGTAGGAGTGT  
AAATCCGTAGATATCTGGAGGAACACCAGTGGCGAAGGCGGCCACTGGACCATTGACGCTGAGGTGCGAAAGCGTG  
GGGAG

>ASV:464:Genus:Lachnospiraceae\_NK4A136\_group  
TACGTAGGGGGCAAGCGTTATCCGGATTTACTGGGTGTAAAGGGAGCGTAGACGGCACAGCAAGTCTGATGTGAAAGCCC  
GGGGCTCAACCCGGAATTGCAATTTGAACTGCTGGCTTGGAGTAGTGCAGAGGGGAGTAAAGCGGAATTCCTAGTGTAGCGGTG  
AAATGCGTAGATATTAGGAGGAACACCAGTGGCGAAGGCGGCTTACTGGACTGTAAGTACGCTTGGGCTCGAAAGCGTG  
GGGAG

>ASV:465:Species:massiliensis/stercoricanis/wadsworthensis  
TACGTAGGGTGAAGCGTTAATCCGGAATTACTGGGCGTAAAGCGTGCAGGCGGTTCTGTAAGACAGATGTGAAATCCC  
CGGGCTCAACCCGGAATTGCAATTTGACTGCAGGACTAGAGTTCATCAGAGGGGGTGGAAATTCAGTGTAGCAGTGT  
AAATGCGTAGATATTGGAAGAACCAATGGCGAAGGCGGCCCTGGGATGCGACTGACGCTCATGCACGAAAGCGTG  
GGGAG

>ASV:466:Genus:UBA1819  
AACGTAGGGTGAAGCGTTGTCCGGAATTACTGGGTGTAAAGGGAGCGCAGGCGGATTGACAAGTTGGGAGTAAAATCTA  
TGGGCTCAACCCATAAATTGCTTTCAAACCTGTCAGTCTTGGAGTGTAGAGGTAGGCGGAATTCCTAGTGTAGCGGTG  
GAATGCGTAGATATCGGGAGGAACACCAGTGGCGAAGGCGGCTTACTGGGCACTAAGTACGCTTGGGCTCGAAAGCATG  
GGTAG

>ASV:467:Species:evryensis  
TACGTAGGGGGCAGCGTTGTTCCGGAATTACTGGGCGTAAAGCGCACGAGGCGGACCAGTAAGTCTGTGCTCAAAGGCG  
GAGGCTCAACCTTCTGTTCCACGATAGATACTGCGGGTCTAGAGTATGTGAGAGGGAAGTGGAAATTCCTAGTGTAGCGGTG  
AAATGCGTAGATATCGGGAGGAACACCAGTGGCGAAGGCGGCTTCTGGCACACAAGTACGCTCATGTGCGAAAGCCAG  
GGCAG

>ASV:468:Family:Lachnospiraceae  
TACGTAGGGGGCAAGCGTTATCCGGATTTACTGGGTGTAAAGGGAGCGTAGACGGCATGGCAAGTCTGAAGTAAAACCC  
AGGGCTCAACCCGGAAGTGTCTTTGAACTGTAAGCTAGAGTGCAGGAGAGGTAAGTGGAAATTCCTAGTGTAGCGGTG  
AAATGCGTAGATATTAGGAGGAACACCAGTGGCGAAGGCGGCTTACTGGACTGTAAGTACGCTTGGGCTCGAAAGCGTG  
GGGAG

>ASV:469:Family:Lachnospiraceae  
TACGTAGGGGGCAAGCGTTATCCGGATTTACTGGGTGTAAAGGGAGCGTAGACGGCATGGCAAGTCTGATGTGAAAGGCC  
GGGGCTCAACCCCGGACTGCATTTGAACTGCCAATCTAGAGTACCAGGAGGGTAAGTGGAAATTCCTAGTGTAGCGGTG  
AAATGCGTAGATATTAGGAGGAACACCAGTGGCGAAGGCGGCTTACTGGACGTAAGTACGCTTGGGCTCGAAAGCGTG  
GGGAG

>ASV:470:Genus:Lachnoclostridium  
TACGTAGGGGGCAAGCGTTATCCGGATTTACTGGGTGTAAAGGGAGCGTAGACGGCGTGAAGTCTGAAGTAAAAGCCC  
GGGGCTCAACCCCGGACTGCTTTGAACTGTAATGCTAGAGTGTGGAGAGGTAAGTGGAAATTCCTAGTGTAGCGGTG  
AAATGCGTAGATATTAGGAGGAACACCAGTGGCGAAGGCGGCTTACTGGACAGTAACTGACGTTGAGGCTCGAAAGCGTG  
GGGAG

>ASV:471:Genus:Ruminococcaceae\_UCG-005  
TACGTAGGTTGCAAGCGTTGTCCGGATTTACTGGGTGTAAAGGGCGTGTAGGCGGAGATGCAAGTTAGGAGTAAAATCTA  
TGGGCTCAACCCATAAATTGCTTTCAAACCTGATCCCTTGGAGTATCGGAGAGGCAAGCGGAATTCCTAGTGTAGCGGTG  
AAATGCGTAGATATTAGGAGGAACACCAGTGGCGAAGGCGGCTTGTGGACGACAAGTACGCTTGGGCGGCAAGGCGTG  
GGGAG

>ASV:472:Genus:UC5-1-2E3  
TACGTAGGGGGCAAGCGTTATCCGGATTTACTGGGTGTAAAGGGAGCGTAGACGGCACAGCAAGTCTGAAGTAAAATCCC  
CGGGCTCAACCCGGAAGTGTCTTTGAACTGCTGGGCTGGAGTGTGGAGAGGCAAGCGGAATTCCTAGTGTAGCGGTG  
AAATGCGTAGATATTAGGAGGAACACCAGTGGCGAAGGCGGCTTGTGGACAGTAACTGACGTTGAGGCTCGAAAGCGTG  
GGGAG

>ASV:473:Order:Mollicutes\_RF39  
TACGTAGGGAGCAAGCGTTATCCGGATTTATTGGGTGTAAAGGGTGCAGTGGCGGTTTATTAGGTCTATGGTTAATTC  
GAAGCTTAACCTCGGTTCCCATAGAAACCGATTTACTTGGATGTAGAGGCAAGTGGAAATTCCTAGTGTAGCGGTAA  
AATGCGTAGATATTAGGAGGAACACCAGTGGCGAAGGCGACTTGTGGCCATCACTGACGCTGAGGACGAAAGCGGTG  
GGAGC

>ASV:474:Genus:Ruminococcaceae\_UCG-003  
TACGTAGGTGGCAAGCGTTGTCCGGATTTACTGGGTGTAAAGGGCGTGCAGCCGGTGGCAAGTCAAGTGTGAAATCTC  
AGGGCTCAACCCGAACTGCATTTGAACTGTGCATCTTGGAGTGGCGGAGAGGTAATCGGAATTCCTGTGTAGCGGTG

AAATGCGTAGATATAAGGAAGAACCACAGTGGCGAAGGCGGATTACTGGACGGTAACTGACGGTGAGGCGCAAAGCGTG  
GGGAG  
>ASV:475:Genus:Coproccoccus\_2  
TACGTATGGTGCAAGCGTTATCCGGATTTACTGGGTGTAAGGGTGCCTAGGTGGTGAACAAGTCTGAAGTAAAATCC  
GGGGCTTAACCCGGAAGTCTTTGAAAAGTGCCTGACTAGAGTACAGGAGAGGTAAGTGAATTCCTAGTGTAGCGGTG  
AAATGCGTAGATATTAGGAGGAACCACAGTGGCGAAGGCGACTTACTGGACTGCTACTGACACTGAGGCACGAAAAGCGTG  
GGGAG  
>ASV:476:Genus:Bacteroides  
TACGGAGGATGCGAGCGTTATCCGGATTTATTGGGTTAAAGGGAGCGCAGACGGGTCGTTAAGTCAGCTGTGAAAATTT  
GGGGCTCAACCTTAAAATTGCAAGTTGATACTGGTGTCTTGGTGTGAGTGGCGGTTGAGGTGTGCGGAATTCGTGGTGTAGCGGTG  
AAATGCTTAGATATCACGAAGAAGTCCGATTGCGAAGGCAGCACACTAAGCCGTAACGACGTTTCATGCTCGAAAAGTGTG  
GGTAT  
>ASV:477:Genus:Blautia  
TACGTAGGGGGCAAGCGTTATCCGGATTTACTGGGTGTAAGGGAGCGTAGACGGTGTGCAAGTCTGATGTGAAAAGGCA  
TAGGCTCAACCTGTGGACTGCATTGAAAAGTGCATACTTGGTGTGAGTGGCGGAGGGTAAGCGGAATTCCTAGTGTAGCGGTG  
AAATGCGTAGATATTAGGAGGAACCACAGTGGCGAAGGCGGCTTACTGGACGGTAACTGACGTTGAGGCTCGAAAAGCGTG  
GGGAG  
>ASV:478:Genus:Tyzzerella\_3  
TACGTATGGTGAAGCGTTATCCGGATTTACTGGGTGTAAGGGTGAAGTGGTGTGCAAGTCTATGTGAAAATGTG  
AGGGCTTAACCTTGGCGCTGCATAAGAACTGTATGACTAGAGTGCAGGAGAGGTAAGCGGAATTCCTAGTGTAGCGGTG  
AAATGCGTAGATATTAGGAGGAACCACAGTGGCGAAGGCGGCTTACTGGACTGTTACTGACGCTGAGTACGAAAAGCGTG  
GGGAG  
>ASV:479:Genus:Lachnospiraceae\_NK4A136\_group  
TACGTAGGGGGCAAGCGTTATCCGGATTTACTGGGTGTAAGGGAGCGTAGACGGTTTTGCAAGTCTGAAGTAAAACCC  
GGGGCTTAACCCGGGACTGCTTTGAAAAGTGTAGGACTAGAGTGCAGGAGAGGTAAGTGAATTCCTAGTGTAGCGGTG  
AAATGCGTAGATATTAGGAGGAACCACAGTGGCGAAGGCGGCTTACTGGACTGTAACGACGTTGAGGCTCGAAAAGCGTG  
GGGAG  
>ASV:480:Genus:Paraprevotella  
TACGGAAAGATGCGAGCGTTATCCGGATTTATTGGGTTAAAGGGAGCGTAGGCGGGCTTTTAAAGTCAGCGGTCAAATGCC  
ACGGCTCAACCGTGGCCAGCGGTTGAAAAGTGCAGGCTTGGTGTGAGTGTGACAGGGCACATGGAATTCGTGGTGTAGCGGTGA  
AATGCTTAGATATCACGAAGAAGTCCGATCGCAAGGCATTGTGCCGGGCATAACTGACGCTGAGGCTCGAAAAGTGGCG  
GTATC  
>ASV:481:Genus:Bacteroides  
TACGGAGGATCCGAGCGTTATCCGGATTTATTGGGTTAAAGGGAGCGTAGATGGGTTGTTAAGTCAGTTGTGAAAATTT  
GCGGCTCAACCGTAAAATTGCAATTGATACTGGCGTCTTGGTGTGAGTACAGTTGAGGTGGCGGAATTCGTGGTGTAGCGGTG  
AAATGCTTAGATATCACGAAGAAGTCCATTGCGAAGGCAGCTCACTAACTGCAACTGACATTGAGGCTCGAAAAGTGTG  
GGTAT  
>ASV:482:Species:massiliensis  
TACGTAGGTGGCAAGCGTTGTCCGGAATTACTGGGTGTAAGGGAGCGTAGGCGGGGAGACAAGTTGAATGTCTAAACTA  
TCGGCTTAACCTGATAGTCGCGTTCAAAGTATCACTCTTGGTGTGAGTGCAGTAGAGGTAGGCGGAATTCCTAGTGTAGCGGTGA  
AATGCGTAGATATTAGGAGGAACCACAGTGGCGAAGGCGGCTTACTGGGCTGTAACGACGCTGAGGCTCGAAAAGCGTG  
GTAGC  
>ASV:483:Genus:Alistipes  
TACGGAGGATCAAGCGTTATCCGGATTTATTGGGTTAAAGGGTGCCTAGGCGGTTTTGATAAGTTAGAGGTGAAAATGTT  
AGGGCTCAACCTGAAACTGCCTTAATACTGTTGGACTAGAGAGTGTGGGTTAGGCGGAATGTATGGTGTAGCGGTG  
AAATGCTTAGAGATCATACAGAACCAGTGGCGAAGGCAGCTTACCAAATATATCTGACGTTGAGGCACGAAAAGCGTG  
GGGAG  
>ASV:484:Genus:Lachnoclostridium  
TACGTAGGGGGCAAGCGTTATCCGGATTTACTGGGTGTAAGGGAGCGTAGACGGCATGGCAAGTCTGAAGTAAAAGCCC  
GGGGCTCAACCCGGGACTGCTTTGAAAAGTGTGAGGCTAGAGTGTGGAGAGGTAAGTGAATTCCTAGTGTAGCGGTG  
AAATGCGTAGATATTAGGAGGAACCACAGTGGCGAAGGCGGCTTACTGGACAGTAACTGACGTTGAGGCTCGAAAAGCGTG  
GGGAG  
>ASV:485:Genus:Ruminococcaceae\_UCG-005  
TACGTAGGTGGCAAGCGTTGTCCGGAATTACTGGGTGTAAGGGCGTGTAGGCGGAGAAGCAAGTCAAGAAGTAAAATCCA  
TGGGCTTAACCCATGAAGTCTTTTAAAAGTGTTCCTTGGTGTGAGTATCGGAGAGGCAGGCGGAATTCCTAGTGTAGCGGTG  
AAATGCGTAGATATTAGGAGGAATACCAGTGGCGAAGGCGGCTGCTGGACGACAACGACGCTGAGGCGCAAAGCGTG  
GGGAG  
>ASV:486:Family:Prevotellaceae  
TACGGAAAGTCCGGGCTTATCCGGATTTATTGGGTTAAAGGGAGCGTAGGCGGCTGTTAAGCGTGTGTGAAAATGTC  
GTGGCTCAACCCGGGACTGCAGCGCAACTGGCAGACTTGGTGTGACGGTAGGAAGGCGGAATTCGTGCTGTAGCGGTG  
AAATGCTTAGATATGACGAAGAAGTCCGATTGCGAAGGCAGCTTCCGTAGTGTAACTGACGCTGAAGCTCGAAAAGCGTG  
GGTAT  
>ASV:487:Genus:Ruminococcaceae\_UCG-014  
TACGTAGGGAGCGAGCGTTATCCGGATTTATTGGGTGTAAGGGTGCCTAGACGGGAAGTCAAGTTAGTTGTGAAAATCCC  
TCGGCTTAACCTGAGGAACTGCAACTAAAAGTATTTCTTGGTGTGAGTGTGGAGAGGAAAGTGAATTCCTAGTGTAGCGGTG  
AAATGCGTAGATATTAGGAGGAACCACAGTGGCGAAGGCGGCTTCTGGACAGAAAAGTCAAGTGTGAGGCTCGAAAAGCGTG  
GGGAG  
>ASV:488:Genus:Christensenellaceae\_R-7\_group

TACGTAGGGGGCGAGCGTTGTCCGGAATTATTGGGCGTAAAGGGCGCGTAGACGGCTGAGTAAGTTACTGGTGAAAGCCC  
AGCTTTTAAAGCTGGAATTGCCGTAATACTGTTTACGCTTGTAGTGCAGGAGAGGGAAGCGGAATTCCTAGTGTAGCGGTG  
AAATGCGTAGATATTAGGAGGAACACCAGTGGCGAAGGCGGCTTTCTGGACTGTAACGACGTTGAGGCGCGAAAGCGTG  
GGGAG

>ASV:489:Genus:Lachnoclostridium

TACGTAGGGGGCAAGCGTTATCCGGATTTACTGGGTGTAAGGGAGCGTAGACGGAAGTGAAGTCTGAAGTGAAGCCC  
GGGGCTCAACCCCGTACTGCTTTGAAACTGTGCTTCTAGAGTGTGCGGAGAGGTAAGCGGAATTCCTAGTGTAGCGGTG  
AAATGCGTAGATATTAGGAGGAACACCAGTGGCGAAGGCGGCTTACTGGACGATAACGACGTTGAGGCTCGAAAGCGTG  
GGGAG

>ASV:490:Genus:Megamonas

TACGTAGGCGGCAAGCGTTGTCCGGAATTATTGGGCGTAAAGGGAGCGCAGGCGGGAACTAAGCGGATCTTAAAAGTGC  
GGGGCTCAACCCCGTACTGCTTTGAAACTGTGCTTCTAGAGTGTGCGGAGAGGTAAGCGGAATTCCTAGTGTAGCGGTG  
AAATGCGTAGATATTGGGAAGAACACCAGTGGCGAAGGCGGCTTCTGGACTGTAACGACGCTGAGGCTCGAAAGCTAGG  
GTAGC

>ASV:491:Genus:Prevotella\_2

TACGGAAGGTCGGGGCTTATCCGGATTTATTGGGTTTAAAGGGAGCGTAGGCCGTTTGTAAAGCGTGTGTGAAATGTC  
GGGGCTCAACCTGGGCATTGACGCGGAACTGGCAGACTTGTAGTGTGCGGGAAGTAGGCGGAATTCCTAGTGTAGCGGTG  
AAATGCGTAGATATTGCAAGAACTCCGATTGCGAAGGCGGCTTCTGGACTGTAACGACGCTGAGGCTCGAAAGCGTG  
GGTAT

>ASV:492:Family:Ruminococcaceae

TACGTAGGGAGCAAGCGTTGTCCGGAATTACTGGGTGTAAGGGTGCCTAGGCGGAACTGCAAGTCAAGTCAAGTCAAGTCTG  
AGGGCTCAACCTCAAACTGCCATTGAAACTGTGGTCTTGTAGTGAAGTAGAGGTAGGCGGAATTCCTAGTGTAGCGGTG  
GAATGCGTAGATATTGCGGAGGAACACCAGTGGCGAAGGCGGCTTACTGGGCTTAACTGACGCTGAGGCACGAAAGCATG  
GGTAG

>ASV:493:Genus:Tyzzerella

TACGTAGGGGGCAAGCGTTATCCGGAATTACTGGGTGTAAGGGAGCGTAGGCGGCACGCCAAGCCAGATGTGAAAGCCC  
GAGGCTTAACTCGTGGATTGCATTTGAACTGGCGAGCTAGAGTACAGGAGAGGAAAGCGGAATTCCTAGTGTAGCGGTG  
GAAATGCGTAGATATTAGGAAGAACACCAGTGGCGAAGGCGGCTTCTGGACTGAACTGACGCTGAGGCTCGAAAGCGTG  
GGGA

>ASV:494:Genus:Bifidobacterium

TACGTAGGGGCAAGCGTTATCCGGATTTATTGGGCGTAAAGGGCTCGTAGGCGGCTCGTCCGCTCCGGTGTGAAAGTCC  
ATCGCTTAAACCGTGGATCTGCGCCGGTACGGGCGGGCTGGAGTGCAGGAGAGGTAAGTGAATTCCTAGTGTAGCGGTG  
GAATGCGTAGATATTGCGGAAGAACACCAGTGGCGAAGGCGGCTTCTGGGCGTACTGACGCTGAGGAGCGAAAGCGTG  
GGGAG

>ASV:495:Genus:GCA-900066575

TACGTAGGGGGCAAGCGTTATCCGGATTTACTGGGTGTAAGGGAGCGTAGGCGGCTGACAAGTCAAGTCAAGTCAAGTCAAGTCC  
GGGGCTCAACCCCGGACTGCTTTTGAAGTCCGGACTAGATTGCAGGAGAGGTAAGTGAATTCCTAGTGTAGCGGTG  
AAATGCGTAGATATTAGGAGGAACACCAGTGGCGAAGGCGGCTTACTGGACTGTAATGACGCTGAGGCTCGAAAGCGTG  
GGGAG

>ASV:496:Genus:Lachnospiraceae\_AC2044\_group

TACGTAGGGGGCAAGCGTTATCCGGATTTACTGGGTGTAAGGGAGCGTAGACGGCATGGCAAGTCTGAAGTGAATGCG  
GGGGCTCAACCCCGGACTGCTTTTGAAGTCCGGACTAGATTGCAGGAGAGGTAAGTGAATTCCTAGTGTAGCGGTG  
AAATGCGTAGATATTAGGAGGAACACCAGTGGCGAAGGCGGCTTACTGGACTGTAACGACGTTGAGGCTCGAAAGCGTG  
GGGAG

>ASV:497:Genus:Ruminococcaceae\_UCG-002

TACGTAGGTGGCAAGCGTTGTCCGATTTACTGGGTGTAAGGGCGTGCAGCCGGTCTGCAAGTCAAGTCAAGTCAAGTCCA  
TGGGCTCAACCCCGGACTGCTTTTGAAGTCCGGACTAGATTGCAGGAGAGGTAAGTGAATTCCTAGTGTAGCGGTG  
AAATGCGTAGATATTAGGAGGAACACCAGTGGCGAAGGCGGATTGCTGGACGATAACGACGTTGAGGCTCGAAAGCGTG  
GGGAG

>ASV:498:Family:Lachnospiraceae

TACGTAGGGGGCAAGCGTTATCCGGATTTACTGGGTGTAAGGGAGCGTAGACGGCTAAGCAAGTCAAGTCAAGTCAAGTCC  
GGGGCTCAACCCCGGACTGCTTTTGAAGTCCGGACTAGATTGCAGGAGAGGTAAGCGGAATTCCTAGTGTAGCGGTG  
AAATGCGTAGATATTAGGAGGAACACCAGTGGCGAAGGCGGCTTACTGGACGATAACGACGTTGAGGCTCGAAAGCGTG  
GGGAG

>ASV:499:Species:perfringens/thermophilus

TACGTAGGTGGCGAGCGTTATCCGGATTTACTGGGCGTAAAGGGAGCGTAGGCGGATGATTAAGTGGGATGTGAAATACC  
CGGGCTCAACTTGGGTGCTGCTTTTGAAGTCCAACTGGTTATCTAGAGTGCAGGAGAGGAGAGTGAATTCCTAGTGTAGCGGTG  
AAATGCGTAGAGATTAGGAAGAACACCAGTGGCGAAGGCGACTCTCTGGACTGTAACGACGCTGAGGCTCGAAAGCGTG  
GGGAG

>ASV:500:Family:Ruminococcaceae

TACGTAGGGAGCGAGCGTTGTCCGGATTTACTGGGTGTAAGGGTGCCTAGGCGGGAAAGCAAGTCAAGTCAAGTCAAGTACC  
GGGGCTCAACTCCGGGCTGCGCTTGAAGTCTTTTTCTTGTAGTGAAGTAGAGGCGAGGCGGAATTCCTAGTGTAGCGGTG  
GAATGCGTAGATATTAGGAGGAACACCAGTGGCGAAGGCGGCTTCTGGGCTTAACTGACGCTGAGGCACGAAAGCATG  
GGGAG

>ASV:501:Species:ratti/seminalis

TACGTAGGTGGCAAGCGTTGTCCGGAATTATTGGGCGTAAAGCGCGCAGGCGGTTTCATAAGTCTGTCTTAAAAGTGC  
GGGGCTTAAACCCCGTACTGAGGGATGAAACTATGAACTGGAGTATCGGAGAGGAAAGCGGAATTCCTAGTGTAGCGGTG  
AAATGCGTAGATATTAGGAAGAACACCAGTGGCGAAGGCGGCTTCTGGACGACAACGACGCTGAGGCGGAAAGCCAGG

GGAGC  
>ASV:502:Family:Lachnospiraceae  
TACGTAGGGGGCAAGCGTTATCCGGATTTACTGGGTGTAAGGGAGCGTAGACGGCATGGCAAGCCAGATGTGAAAGCCC  
GGGGCTCAACCCGGGACTGCATTTGAACTGTCAGGCTAGAGTGTCCGAGGGGAAAGCGGAATTCCTAGTGTAGCGGTG  
AATGCGTAGATATTAGGAGGAACACCAGTGGCGAAGGCGGCTTTCTGGACGATGACTGACGTTGAGGCTCGAAAGCGTG  
GGAG  
>ASV:503:Genus:Adlercreutzia  
TACGTAGGGGGCAGCGTTATCCGGATTTACTGGGCGTAAAGCGCGTAGGCGGCCCTAAGCGGAACCTCTAATCCC  
GGGGCTCAACCTCGGGCCGGTTCCGGACTGGGCGGCTCGAGTGCAGTAGAGGCAGGCGGAATTCCTAGTGTAGCGGTG  
AATGCGCAGATATCGGGAAGAACACCGATGGCGAAGGCAGCTGCTGGGCCGCACTGACGCTGAGGCGGAAAGCTGG  
GGAG  
>ASV:504:Family:Prevotellaceae  
TACGGAAGGTCGGGCGTTATCCGGATTTATTGGGTTAAAGGGAGCGTAGGCGCTTTTTAAGCGTGTGTGAAATACT  
GTCGCTCAACGACAGAGGTGCAGCGCAACTGGGAGACTTGAAGTGCAGCGGAATGCAGGCGGAATTCCTAGTGTAGCGGTG  
AATGCTTAGATATGACGAAGAACTCCGATTGCGAAGGCAGCTTGCAGTAGCGTAACGACGCTGAAGCTCGAAAGTGGC  
GGTAT  
>ASV:505:Family:Lachnospiraceae  
TACGTAGGGGGCAAGCGTTATCCGGATTTACTGGGTGTAAGGGAGCGTAGACGGCATGGCAAGCCAGATGTGAAAGCCC  
GGGGCTCAACCCGGGACTGCATTTGAACTGTCAGGCTAGAGTGTCCGAGAGGAAAGCGGAATTCCTAGTGTAGCGGTG  
AATGCGTAGATATTAGGAGGAACACCAGTGGCGAAGGCGGCTTTCTGGACGTTGACTGACGTTGAGGCTCGAAAGCGTG  
GGAG  
>ASV:506:Genus:Blautia  
TACGTAGGGGGCAAGCGTTATCCGGATTTACTGGGTGTAAGGGAGCGTAGACGGTGTGGCAAGTCTGATGTGAAAGGCA  
TGGGCTCAACCCGTTGACTGCATTGAAACTGTCATACTTGAAGTGCAGGAGGGGTAAGCGGAATTCCTAGTGTAGCGGTG  
AATGCGTAGATATTAGGAGGAACACCAGTGGCGAAGGCGGCTTACTGGACGTTAAGTACGCTGAGGCTCGAAAGCGTG  
GGAG  
>ASV:507:Family:Lachnospiraceae  
TACGTAGGGGGCAAGCGTTATCCGGATTTACTGGGTGTAAGGGAGCGTAGACGGCAGCGCAAGTCTGAAGTAAAGCCC  
GGGGCTCAACCCGGAATGGCTTTGAAACTGTGCAGCTAGAGTACCAGGAGGGGTAAGCGGAATTCCTAGTGTAGCGGTG  
AATGCGTAGATATTAGGAGGAACACCAGTGGCGAAGGCGGCTTACTGGACGTTAAGTACGCTGAGGCTCGAAAGCGTG  
GGAG  
>ASV:508:Genus:Family\_XIII\_AD3011\_group  
TACGTAGGGGGCAAGCGTTATCCGGAATTTATTGGGCGTAAAGAGTGCAGTGGTAACTTAAGCGGGGTTAAAGGCA  
ATGGCTTAACCATTTGTCGCCCGGAACTGGGATACTTGAAGTGCAGGAGAGGAAAGCGGAATTCCTAGTGTAGCGGTG  
AATGCGTAGATATTAGGAGGAACACCAGTGGCGAAGGCGGCTTTCTGGACTGAAACTGACACTGAGGACGAAAGTGTGG  
GGAG  
>ASV:509:Species:clara  
TACGGAAGATGCGAGCGTTATCCGGATTTATTGGGTTAAAGGGAGCGTAGGCGGGCTTTAAGTACGCGGTCAAATGTC  
ACGGCTCAACCGTGGCCAGCCGTTGAAACTGTAAGCCTTGAAGTGTGCACAGGGCACATGGAATTCGTGGTGTAGCGGTG  
AATGCTTAGATATCAGGAAGAACTCCGATCGCGAAGGCATTGTGCCGGGCGAGCACTGACGCTGAGGCTCGAAAGTGGC  
GTATC  
>ASV:510:Species:salyersiae  
TACGAGGATCCGAGCGTTATCCGGATTTATTGGGTTAAAGGGAGCGTAGGTGGACATGTAAGTCAAGTGTGAAAGTTT  
GCGGCTCAACCGTAAATGTCAGTTGATACTGCGTGTCTTGAAGTACAGTAGAGGTGGGCGGAATTCGTGGTGTAGCGGTG  
AATGCTTAGATATCAGGAAGAACTCCGATTGCGAAGGCAGCTACTGGACTGCAACTGACACTGATGCTCGAAAGTGTG  
GGTAT  
>ASV:511:Species:fermentans/massiliensis/timonensis  
TACGTAGGTGGCAAGCGTTGTCGGAAATTTATTGGGCGTAAAGAGCATGTAGGCGGGCTTTAAGTCCGACGTGAAATGC  
GGGGCTTAACCCGATGGCGTTGGATACTGGAAGTCTTGAAGTGCAGGAGAGGAAAGGGGAATTCCTAGTGTAGCGGTG  
AATGCGTAGATATTGGGAGGAACACCAGTGGCGAAGGCGGCTTTCTGGACTGTGTGACGCTGAGATGCGAAAGCCAGG  
GTAGC  
>ASV:512:Genus:Butyricicoccus  
TACGTAGGGAGCAAGCGTTATCCGGATTTACTGGGTGTAAGGGCGCGCAGGCGGGCCGCAAGTTGGGAGTGAATCCG  
GGGGCTTAACCCCGAAGTCTTCAAAGTCTGCTTGAAGTGTGAGTGGAGAGGCAGGCGGAATTCCTGTTGTAGCGGTG  
AATGCGTAGATATACGGAAGAACACCAGTGGCGAAGGCGGCTGCTGGACATTAAGTACGCTGAGGCGGAAAGCGTG  
GGAG  
>ASV:513:Family:Eggerthellaceae  
TACGTAGGGAGCGAGCGTTATCCGGATTTACTGGGCGTAAAGCGCGCGTAGGCGGCCGTCAAGCGGGGTTTCAAATCCA  
GGGGCTCAACCTCTGGCCGGACCCCGAAGTGGCGGCTCGAGTGCAGTAGAGGAAAGTGGGAATTCCTAGTGTAGCGGTG  
AATGCGCAGATATTGGGAAGAACACCGATGGCGAAGGCAGCTTCTGGGCCGCACTGACGCTGAGGCGGAAAGCTAGG  
GGAGC  
>ASV:514:Genus:Ruminococcaceae\_UCG-013  
TACGTAGGTGGCAAGCGTTGTCGGATTTACTGGGTGTAAGGGCGGTAGGCGGGTAGACAAGTCAAGTGTGAAATACC  
GGGGCTCAACTCCGGGCTGCATTTGAAACTGTATATCTTGAAGTGTCCGAGAGGAAAGCGGAATTCCTAGTGTAGCGGTG  
AATGCGTAGATATTAGGAGGAACACCAGTGGCGAAGGCGGCTTTCTGGACGATAACTGACGCTGAGGCGGAAAGCGTG  
GGAG  
>ASV:515:Genus:Enterococcus  
TACGTAGGTGGCAAGCGTTGTCGGATTTATTGGGCGTAAAGCGAGCGAGGCGGTTTCTAAGTCTGATGTGAAAGCCC

CCGGCTCAACCGGGAGGGTCATTGAACTGGGAGACTTGGTGCAGAAGAGGAGTGAATTCCATGTGTAGCGGTG  
AAATGCGTAGATATATGGAGAACACCAGTGGCGAAGGCGGCTCTCTGGTCTGTAACGACGCTGAGGCTCGAAAGCGTG  
GGGAG  
>ASV:516:Genus:Bacteroides  
TACGGAGGATCAAGCGTTATCCGGATTTATTGGGTTTAAAGGGAGCGTAGGCGGACTATTAAGTCAGCTGTGAAAGTTT  
GCGGCTCAACCGTAAATGCAAGTTGATACTGGTCTGCTTGGTGCAGTAGAGGTAGGCGGAATTCGTGGTGTAGCGGTG  
AAATGCTTAGATATCACGAAGAACCAGATTGCGAAGGCAGCTTACTGGACTGTAACGACGCTGATGCTCGAAAGGTG  
GGTAT  
>ASV:517:Species:uenonis  
TACGGAGGATGCGAGCGTTATCCGGAATTATTGGGTTTAAAGGGTGCCTAGGTTGCAAGGGAAGTCAGGGGTGAAAAGCT  
ATAGCTCAACTATGGTCTTGCCTTTGAAACTCTCTAGCTAGAGTGTACTGGAGGTACGTGGAACGTGTGGTGTAGCGGTG  
AAATGCATAGATATCACACAGAACCAGATTGCGCAGGCAGCGTACTACATTACAACGACACTGAAGCACGAAAGCGTG  
GGTAT  
>ASV:518:Family:Lachnospiraceae  
TACGTATGGTCAAGCGTTATCCGGATTTACTGGGTGTAAGGGAGCGTAGACGGATAGGCAAGTCTGGAGTAAAAGCCC  
GGGGCTCAACCCCGGACTGCTTTGAAACTGTTTATCTAGAGTGTGGAGAGGTAAGTGAATTCCTAGTGTAGCGGTG  
AAATGCGTAGATATTAGGAGGAACACCAGTGGCGAAGGCGGCTTACTGGACAGTAACGACGTTGAGGCTCGAAAGCGTG  
GGGAG  
>ASV:519:Family:Lachnospiraceae  
TACGTAGGGGCAAGCGTTATCCGGATTTACTGGGTGTAAGGGAGCGTAGACGGTTATGTAAGTCTGATGTGAAAACCC  
GGGGCTCAACCCCGGACTGCATTGAAACTATGTAACGAGTGTGGAGAGGTAAGTGAATTCCTAGTGTAGCGGTG  
AAATGCGTAGATATTAGGAGGAACACCAGTGGCGAAGGCGGCTTACTGGACGATGACTGACGTTGAGGCTCGAAAGCGTG  
GGGAG  
>ASV:520:Genus:Candidatus\_Stoquefichus  
TACGTAGGTGGCGAGCGTTATCCGGAATCATTGGGCTTAAAGGGAGCGAGGCGCAACTAGGGTCTGCGGTAAAAGACC  
GAAGCTAAACTTCGGTAAGCCGTGAAACCGAGGAGCTAGAGTGCAGTAGAGGATCGTGAATTCCTAGTGTAGCGGTGA  
AATGCGTAGATATATGGAGGAACACCAGTGGCGAAGGCGGCTTACTGGGCTGCAACTGACGCTCAGTCCGAAAGCGGTG  
GGAGC  
>ASV:521:Genus:Ruminiclostridium\_9  
TACGTAGGTGGCGAGCGTTATCCGGATTTACTGGGTGTAAGGGAGCGTAGGCGGGACTGCAAGTCAGATGTGAAAACCA  
TGGGCTCAACCTGTGGCCTGCATTTGAAACTGTAGTCTTGGTACTGGAGAGGCAGACGGAATTCCTAGTGTAGCGGTG  
AAATGCGTAGATATTAGGAGGAACACCAGTGGCGAAGGCGGCTGCTGGACAGCAACGACGCTGAGGCGCAAAAGCGTG  
GGGAG  
>ASV:522:Family:Lachnospiraceae  
TACGTAGGGGCAAGCGTTATCCGGATTTACTGGGTGTAAGGGAGCGTAGGCGGCCATGCAAGTCAGAAGTAAAAGCCC  
GGGGCTCAACCCCGGACTGCTTTGAAACTGTAGGGCTAGATTGCCGGAGAGGTGAGCGGAATTCCTAGTGTAGCGGTG  
AAATGCGTAGATATTAGGAGGAACACCAGTGGCGAAGGCGGCTCACTGGACGGTAAATGACGCTGAGGCTCGAAAGCGTG  
GGGAG  
>ASV:523:Genus:Agathobacter  
TACGTATGGAGCAAGCGTTATCCGGATTTACTGGGTGTAAGGGAGCGTAGGCGGCTCTGCAAGTCTGATGTGAAAACCC  
GGGGCTCAACCCCGGACTGCATTGAAACTGTAGGACTAGAGTGTGGAGGGGTAAGTGAATTCCTAGTGTAGCGGTG  
AAATGCGTAGATATTAGGAGGAACACCAGTGGCGAAGGCGGCTTACTGGACGACCACTGACGCTGAGGCTCGAAAGCGTG  
GGGAG  
>ASV:524:Genus:Parasutterella  
TACGTAGGGTGGCAGCGTTAATCCGGAATTACTGGGCGTAAAGGGTGCAGGCGGTTGAGTAAGACAGATGTGAAATCCC  
CGAGCTTAACTCGGGAATGGCAGATGTGACTGCTCGGCTAGAGTGTGTCAGAGGGAGGTGGAATTCACGCTGATGACG  
AAATGCGTAGATATTGGAAGAACCAGATGGCGAAGGCGGCTCCTGGGACATAACTGACGCTCAGGCACGAAAGCGTG  
GGGAG  
>ASV:525:Genus:Lachnospiraceae\_UCG-001  
TACGTATGGTCAAGCGTTATCCGGATTTACTGGGTGTAAGGGAGCGCAGGCGGCTCTGCAAGTCTGATGTGAAAAGCCC  
GGGGCTCAACCCCGGACTGCATTGAAACTGTGACTAGAGTGTGGAGAGGTAAGTGAATTCCTAGTGTAGCGGTG  
AAATGCGTAGATATTAGGAGGAACACCAGTGGCGAAGGCGGCTTACTGGACGATAACTGACGCTGAGGCTCGAAAGCGTG  
GGGAG  
>ASV:526:Genus:UC5-1-2E3  
TACGTAGGGGCAAGCGTTATCCGGATTTACTGGGTGTAAGGGAGCGTAGACGGCACAGCAAGTCTGAAGTGAATCCC  
CGGGCTCAACCCGGAACTGCTTTGAAACTGTTGGGCTGGAGTGTGGAGAGGCAAGCGGAATTCCTAGTGTAGCGGTG  
AAATGCGTAGATATTAGGAGGAACACCAGTGGCGAAGGCGGCTTCTGGACAGTAACGACGTTGAAGCTCGAAAGCGTG  
GGGAG  
>ASV:527:Genus:Christensenellaceae\_R-7\_group  
TACGTAGGGGCAAGCGTTGTCGGAAATGATTGGGCGTAAAGGGCGCGTAGGCGGCTGGTAAGTTTGAAGTAAAAGTCC  
TTCTTTTAAAGGAGGAACTGCTTTGAAACTGTGCGGCTTGGTGCAGGAGAGGTAAGCGGAATTCCTAGTGTAGCGGTG  
AAATGCGTAGAGATCGGAGGAACACCAGTGGCGAAGGCGGCTTACTGGACTGTTACTGACGCTGAGGCGCAAAAGGTG  
GGGAG  
>ASV:528:Species:distasonis  
TACGGAGGATCCGAGCGTTATCCGGATTTATTGGGTTTAAAGGGTGCCTAGGCGGCTTTTAAAGTCAGCGGTGAAAAGTCT  
GTGGCTCAACCATAGAAATGCGGTTGAAACTGGGGGCTTGGTATGTTTGGAGGAGGCGGAATGCGTGGTGTAGCGGTG  
AAATGCTTAGATATCACGAGAACCCGATTGCGAAGGCAGCCTGCCAAGCCATGACTGACGCTGATGACGAAAGCGTG  
GGGAT

>ASV:529:Genus:Ezakiella  
TACGT AAGGGGCGAGCGTTGTCCGGAATTATTGGGCGTAAAGAGTGCCTAGGCGGCAAATTAAGTCAGATGTGAAAAC  
AGGGCTCAACCCATAGATTGCATCTGAAACTGATATGCTTGAGTCAAGGAGAGGAAAGTGAATTCCTAGTGTAGCGGTG  
GAATGCGTAGATATTAGGAGGAATACCGGTGGCGAAGGCGACTTTCTGGACTTGAACGACGCTGAGGCACGAAAGCGTG  
GGGAG

>ASV:530:Family:Prevotellaceae  
TACGGAAGGTCCAGGCGTTATCCGGATTTATTGGGTTTAAAGGGAGCGTAGGCCGTTTTTAAAGCGTGTGTGAAATACT  
ATCGCTCAACGACAGAGGTGACGCGCAACTGGAGGACTTGTAGTGCAGCGGAATGTAGCGGAATTCGTGTAGCGGTG  
AAATGCTTAGATATGACGAAGAAGCTCCGATTGCGAAGGCGACTTACAGTAGCGTAACTGACGCTGAAGCTCGAAAGTGG  
GGTAT

>ASV:531:Order:Mollicutes\_RF39  
TACGTAGGGGGCAAGCGTTATCCGGATTTATTGGGCGTAAAGCGTGTGTAGGCGTTTTATTAAGTTAAGATTAAGGCC  
GGGGCTCAACCCCTGCACTGCAGCGCAACTGGAGGCTTGTAGTACACACAAAGTAGCGGAATTCCTAGTGTAGCGGTG  
AATGCGTAGATATTAGAAGGAACACAGTGGCGAAAGCGTTTTGCTGGGCCGTTACTGACGCTGAGGCACGAAAGCGTG  
GGAG

>ASV:532:Family:Prevotellaceae  
TACGGAAGGTCCAGGCGTTATCCGGATTCATTGGGTTTAAAGGGAGCGTAGGCCGCTTTTTAAGCGTGTGTGAAATGTA  
GGGGCTCAACCCCTGCACTGCAGCGCAACTGGAGGCTTGTAGTACACACAAAGTAGCGGAATTCATGGTGTAGCGGTG  
AAATGCTTAGATATCATGAAGAACCCGATTGCGAAGGCGACTTACTGGAGTGAACGACGCTGAAGCTCGAAAGCGCG  
GGTAT

>ASV:533:Species:pigrum  
TACGTAGGTGACAAGCGTTGTCCGGATTTATTGGGCGTAAAGGGAGCGCAGGCGGTCTGTTTAGTCTAATGTGAAAGCCC  
ACGGCTTAACCGTGGAAACGGCATTGAAACTGACAGACTTGAATGTAGAAGAGGAAAATGGAATTCCTAGTGTAGCGGTG  
GAATGCGTAGATATTGGAGGAACACAGTGGCGAAGGCGATTTCTGGTCTAACATTGACGCTGAGGCTCGAAAGCGTG  
GGGAG

>ASV:534:Genus:Erysipelotrichaceae\_UCG-003  
TACGTAGGTGGCGAGCGTTATCCGGAATTATTGGGCGTAAAGGGAGCGCAGGCGGACTAAGGGTCTGTGGTGAAGAAG  
GAAGCTTAACCTCGGTAAAGCCATGGAAACCGTAGAGCTAGAGTGTGTGAGAGGATCGTGAATTCATGTGTAGCGGTG  
AATGCGTAGATATGAGGAACACAGTGGCGAAGGCGACGATCTGGCGATAACTGACGCTCAGTCCGAAAGCGTGG  
GGAG

>ASV:535:Order:Clostridiales  
TACGTAGGGGGCGAGCGTTGTCCGGAATTACTGGGCGTAAAGGGAGCGTAGGCCGCTGATAAGTTGGATGTGAAATACC  
CGGGCTTAACCTGGGGGTGCATCCAATACTGTTGACTAGAGTACAGGAGAGGAAAGCGGAATTCCTAGTGTAGCGGTG  
AAATGCATAGATATTAGGAGGAACATCGGTGGCGAAGGCGGCTTTCTGGACTGCAACTGACGCTGAGGCTCGAAAGCGTG  
GGGAG

>ASV:536:Species:porcinus/rossii  
TACGGAGGGTGCAGCGTTAATCGGAATAACTGGGCGTAAAGGGCACGAGGCGGTGACTTAAGTGAGATGTGAAAGCCC  
CGGGCTTAACCTGGGAATTGCATTTCACTAGGTCGCTAGAGTACTTTAGGGAGGGGTAGAATTCACGCTGTAGCGGTG  
AAATGCGTAGAGATGTGGAGGAATACCGAAGGCGAAGGCGAGCCCTTGGGAATGTACTGACGCTCATGTGCGAAAGCGTG  
GGGAG

>ASV:537:Genus:Bacteroides  
TACGGAGGATCCGAGCGTTATCCGGATTTATTGGGTTTAAAGGGAGCGTAGGCCGACGCTTAAGTCAGTTGTGAAAGTTT  
GCGGCTCAACCGTAAATTTGCACTTACTGGGTGCTTGTAGTACAGTAGAGGAGGCGGAATTCGTGGTGTAGCGGTG  
AAATGCTTAGATATCACGAAGAAGCTCCGATTGCGAAGGTAGCTTGTGACTGTAACGACGCTGATGCTCGAAAGTGTG  
GGTAT

>ASV:538:Species:xylaniphila  
TACGGAAGATGCGAGCGTTATCCGGATTTATTGGGTTTAAAGGGAGCGTAGGCCGAGTCAAGTCAGCGGTCAAATGGC  
GCGGCTCAACCGCGTTCCGCGTTGAAACTGGCAGCCTTGTAGTATGCACAGGGTACATGGAATTCGTGGTGTAGCGGTG  
AATGCTTAGATATCACGAGGAAGCTCCGATCGCGCAGGCAATTGTACCGGGCATTACTGACGCTGAGGCTCGAAGGTGCG  
GTATC

>ASV:539:Genus:Dielma  
TACGTAGGTGGCAAGCGTTATCCGGAATTATTGGGCGTAAAGGGTGCCTAGGCGGCTGAATAAGTCTGAGGTAAAAGCCC  
GTGGCTCAACCCAGGTAAGCCTTGGAAACTGTTAGCTAGAGTGCAGGAGAGGACAATGGAATTCATGTGTAGCGGTAA  
AATGCGTAGATATGAGGAACACAGTGGCGAAGGCGGTTGTCTGGCCTGTAACGACGCTGAAGCACGAAAGCGTGG  
GGAG

>ASV:540:Genus:Erysipelatoclostridium  
TACGTAGGTGGCAAGCGTTATCCGGAATTATTGGGCGTAAAGGGAGCGTAGGCCGAGCAAGGGTCTGTGGTAAAAGCCT  
GAAGCTTAACCTCAGTAAGCCATAGAAACAGGTAGCTAGAGTGCAGGAGAGGATCGTGAATTCATGTGTAGCGGTG  
AATGCGTAGATATGAGGAACACAGTGGCGAAGGCGACGATCTGGCCTGCAACTGACGCTCAGTCCGAAAGCGTGG  
GGAG

>ASV:541:Family:Lachnospiraceae  
TACGTAGGGGGCGAGCGTTATCCGGATTTACTGGGTGTAAGGGAGCGTAGACGGCGTATCAAGTCTGATGTGAAAGGCA  
GGGGCTTAACCCCTGGACTGCATTGAAACTGGTATGCTTGTAGTGCAGGAGGGTAAGCGGAATTCCTAGTGTAGCGGTG  
AAATGCGTAGATATTAGGAGGAACACAGTGGCGAAGGCGGCTTACTGGACGTTAAGTGAAGCTGAGGCTCGAAAGCGTG  
GGGAG

>ASV:542:Genus:Dialister  
TACGTAGGTGGCAAGCGTTGTCCGGAATTATTGGGCGTAAAGCGCGCAGGCGGCTTCCCAAGTCCCTCTTAAAAGCGC  
GGGGCTTAACCCCTGATGGGAAGGAAACTGGGAAGTGGAGTATCGGAGAGGAAAGTGAATTCCTAGTGTAGCGGTG



AATGCGTAGAGATTAGGAAGAACACCGGTGGCGAAGGCGACTTTCTGGACGAAAAGTACGCTGAGGCGCGAAAAGCGTGG  
GGAGC  
>ASV:543:Genus:Megasphaera  
TACGTAGGTGGCAAGCGTTGTCCGGAATTATTGGGCGTAAAGGGCGCGCAGGTGGTTTTCTTAAGTCTGTCTTAAAAGTGC  
GGGGCTTAACCCGTGAGGGGACGAAACTGGGAGACTAGAGTATCGGAGAGGAAAGCGGAATTCCTAGTGTAGCGGTGA  
AATGCGTAGATATTAGGAGGAACACCAAGTGGCGAAAGCGGCTTTCTGGACGACAAGTACACTGAGGCGCGAAAAGCCAGG  
GGAGC  
>ASV:544:Genus:Ruminococcaceae\_UCG-010  
TACGTAGGTGGCAGCGTTATCCGGAATTAAGTGGGTGTAAAGGGTGTGTAGGCGGGACGACAAGTACAGTGTGAAAATTG  
CAGGCTCAACTGGAAAGTGCATTTGAAACTGCCGTTCTTGAGAGTGGAGAGGTAATGGAATTCCTGGTGTAGCGGTG  
AAATGCGTAGATATCGGAGGAACACCAAGTGGCGAAGGCGATTTACTGGACGACAAGTACACTGAGGCGCGAAAAGCGTGG  
GGAGC  
>ASV:545:Genus:DTU089  
TACGTAGGGAGCGAGCGTTGTCCGGATTTACTGGGTGTAAAGGGTGCCTAGGCGGATCTGCAAGTACAGTGTGAAATCCC  
AGGGCTTAACCTGGAAGTGCATTTGAAACTGTGGTCTTGAGTGGAGTGGAGGCGAGGCGGAATTCCTGGTGTAGCGGTG  
AAATGCGTAGAGATCGGAGGAACACCAAGTGGCGAAGGCGGCTGCTGGGCTTAAGTACACTGAGGCGCGAAAAGCGTGG  
GGTAG  
>ASV:546:Genus:Thermicanus  
TACGTAGGGGCGAGCGTTGTCCGGAATGATTGGGCGTAAAGGGCGCGCAGGCGGCTTTAAGTCTGATGTAAAAGCC  
GCGGCTTAACCGCGGAAGTGCATTTGAAACTGGGGACTTGGGCTAGGAGAGGGAAGTGAATTCCTGGTGTAGCGGTG  
AAATGCGTAGAGATCGGAGGAATACCAAGTGGCGAAGGCAACTTCTGGCTTAGAAGTACACTGAGGCGCGAAAAGCGTGG  
GGAGC  
>ASV:547:Family:Defluviitaleaceae  
TACGTAGGGGCGAGCGTTATCCGGAATTAAGTGGGTGTAAAGGGTGCCTAGGCGGCACCGTAAGTCTGTTGTGAAAGGCG  
ATGGCTTAACCATCGAAGTGCATTTGAAACTGGGAGCTAGAGTGCAGGAGAGGAAAGCGGAATTCCTAGTGTAGCGGTG  
AAATGCGTAGATATTAGGAAGAACACCAAGTGGCGAAGGCGGCTTTCTGGACTGCAACTGAGGCGCGAAAAGCGTGG  
GGAGC  
>ASV:548:Order:Mollicutes\_RF39  
TACGTAGGGAGCGAGCGTTATCCGGATTTATTGGGTGTAAAGGGTGCCTAGGCGGATTAATAAGTGGTGGTCTAAGCCC  
GAAGCTTAACCTCGGTTCCGCAACAAAAGTGTAACTTGGATATGGTAGAGGCAAGTGAATTCCTAGTGTAGCGGTTA  
AATGCGTAGATATTAGGAAGAACATCAGTGGCGAAGGCGACTTGGTGGGCAACACTGACGCTGAGGCGCGAAAAGCGTGG  
GGAGC  
>ASV:549:Genus:Faecalitalea  
TACGTAGGTGGCAAGCGTTATCCGGAATGATTGGGCGTAAAGGGTGCCTAGGCGGATTAAGTCTGAAAGTAAAAGCCA  
GCAGCTCAACTGCTGTAAAGCTTTGAAACTGGTGTACTAGAGTGCAGGAGAGGGCGATGGAATTCCTAGTGTAGCGGTA  
AATGCGTAGATATTAGGAGGAACACCAAGTGGCGAAGGCGGCTGCCTGGCTGTAAGTACACTGAGGCGCGAAAAGCGTGG  
GGAGC  
>ASV:550:Genus:Sutterella  
TACGTAGGGTGAAGCGTTAATCCGGAATTAAGTGGGCGTAAAGCGTGCAGGCGGTTGGGTAAAGACAGATGTGAAATCCC  
CGGGCTTAACCTGGGAACTGCATTTGTACTGTCCGACTGGAGTACGTCAGAGGGGGTGAATTCACGCTGTAGCAGTGT  
AAATGCGTAGATATTGGAAGAACACCAAGTGGCGAAGGCGGCTTGGTGGGCTTTACTGACGCTGAGGCGCGAAAAGCGTGG  
GGAGC  
>ASV:551:Genus:Angelakisella  
TACGTAGGGAGCGAGCGTTGTCCGGAATTAAGTGGGCGTAAAGGGAGCGTAGGCGGGAAGGCAAGTGGATGTGAAAAGTGC  
TGGGCTCAACCGACAGACTGCATTTCAAAGTGTCTTCTTGAGTGAAGTAGAGGCAAGCGGAATTCCTAGTGTAGCGGTG  
AAATGCGTAGATATTAGGAGGAACACCAAGTGGCGAAGGCGGCTTGGTGGGCTTTACTGACGCTGAGGCTCGAAAAGTGTG  
GGAGC  
>ASV:552:Species:aurimucosum/pseudogenitalium/tuberculostearicum  
TACGTAGGGTGCAGCGTTGTCCGGAATTAAGTGGGCGTAAAGGGCTGTAGGTGGTTTTGTCGGTCTGTGAAATCCC  
GGGGCTTAACCTCGGGCGTGCAGGCGATACGGGCATAACTTGGTACTGTAGGGTAAGTGAATTCCTGGTGTAGCGGTG  
GAAATGCGCAGATATCAGGAGGAACACCAAGTGGCGAAGGCGAGTTACTGGGCGTACTGACGCTGAGGAGCGAAAAGCAT  
GGGTA  
>ASV:553:Genus:Ruminococcaceae\_UCG-005  
TACGTAGGTGGCAAGCGTTGTCCGGATTTACTGGGTGTAAAGGGCGTGTAGGCGGAGCTGCAAGTACAGTGTGAAATCTC  
CGGGCTTAACCCGGAAGTGCATTTGAAACTGTAGCCCTTGGATATCGGAGAGGCAAGCGGAATTCCTAGTGTAGCGGTG  
AAATGCGTAGATATTAGGAGGAACACCAAGTGGCGAAGGCGGCTTGGTGGACGACAAGTACACTGAGGCGCGAAAAGCGTGG  
GGAGC  
>ASV:554:Species:actinosclerus/arenae/grandis/radiotolerans/soli/xiangnanensis  
TACGGAGGGTGCAGCGTTACCCGGAATCACTGGGCGTAAAGGGCGTGTAGGCGGACTTAAGTCTGGTTTTAAAGACT  
GCGGCTCAACCCGAGGATGGACTGGATACTGGGTGTCTTGACCTCTGGAGAGAGAACTGGAATTCCTGGTGTAGCGGTG  
GAATGCGTAGATACCAGGAGGAACACCAATGGCGAAGGCGAGTTCTTGACAGAAAGTGTGACGCTGAGGCGCGAAAAGTGTG  
GGAGC  
>ASV:555:Species:diminuta/naejangsanensis/vancouverii  
TACGAAGGGGCTAGCGTTGTCCGGAATTAAGTGGGCGTAAAGGGCGGCTAGGCGGATCGTTAAGTACAGAGGTGAAATCCC  
AGGGCTCAACCTGGAAGTGCATTTGATACTGGGCTTGGATATGAGAGAGGATGTGGAAGTCCGAGTGTAGAGGTG  
AAATGCGTAGATATTGGAAGAACACCAAGTGGCGAAGGCGACATACTGGCTCATTACTGACGCTGAGGCGCGAAAAGCGTGG  
GGAGC  
>ASV:556:Genus:Negativibacillus

TACGTAGGTGGCAAGCGTTGTCCGGAATTACTGGGTGTAAAGGGAGCGTAGGCGGGGAGACAAGTTGAATGTTAAACTA  
TCGGCTCAACTGATAGTCGCGTTCAAACATCACTCTTGTAGTGCAGTAGAGGTAGGCGGAATTCCTAGTGTAGCGGTGA  
AATGCGTAGATATTAGGAGGAACACCCAGTGGCGAAGGCGGCTACTGGGCTGTAACGTACGCTGAGGCTCGAAAGCGTGG  
GTAGC

>ASV:557:Genus:Erysipelotrichaceae\_UCG-003

TACGTAGGTGGCGAGCGTTATCCGGAATTATTGGGCGTAAAGAGGGAGCAGGCGGCGACTAAGGGTCTGTGGTAAAAGATC  
GAAGCTTAACTTCGTAAGCCATGGAACCGTAGAGCTAGAGTGTGTGAGAGGATCGTGAATTCATGTGTAGTGGTGA  
AATGCGTAGATATTAGGAGGAACACCCAGTGGCGAAGGCGGACGATCTGGCGCATAACTGACGCTCAGTCCGAAAGCGTGG  
GGAGC

>ASV:558:Genus:Prevotella\_9

TACGGAAGGTCCGGGCGTTATCCGGATTTATTGGGTTTAAAGGGAGCGTAGGCCGGAGATTAAGCGTGTGTGAAATGTA  
GTTGCTCAACATCTGCACTGCAAGCGGAACTGGTTTCCTTGTAGTACGCACAAAGTGGGCGGAATTCGTGGTGTAGCGGTG  
AAATGCTTAGATATCACGAAGAACTCCGATTGCGAAGGCAGCTCACTGGAGCGCAACTGACGCTGAAGCTCGAAAGTGGC  
GGTAT

>ASV:559:Family:Ruminococcaceae

TACGTAGGTGGCAAGCGTTGTCCGGAATTACTGGGTGTAAAGGGAGCGCAGGCGGGAAGCAAGTCAGCTGTGAAATCCA  
TGGGCTTAAACCATGAAGTGCAGTTGAAACTGTTTTCTTGTAGTGAAGTAGAGGTTGGCGGAATTCAGAGTGTAGCGGTG  
AAATGCGTAGATATTAGGAGGAACACCCAGTGGCGAAGGCGGCAACTGGGCTTTTACTGACGCTGAGGCTCGAAAGTGTG  
GGGAG

>ASV:560:Species:timonensis

TACGGAAGGTCCGGGCGTTATCCGGATTTATTGGGTTTAAAGGGAGCGTAGGCTGTCTATTAAGCGTGTGTGAAATTTA  
CCGGCTCAACCGGTGGCTTGCAGCGGAACTGGTTCGACTTGTAGTATCGAGGAAGTAGGCGGAATTCATGGTGTAGCGGTG  
AAATGCTTAGATATCATGACGAAGTCCGATTGCGCAGGCAGCTTACTGTAGCATAACTGACGCTGATGCTCGAAAGTGGC  
GGTAT

>ASV:561:Genus:Megasphaera

TACGTAGGTGGCAAGCGTTGTCCGGAATTATTGGGCGTAAAGGGCGCGCAGGCGGCGTGCAGAGTCCGTTAAAAGTGC  
GGGGCTTAAACCCGTGAGGGGACCGAACTGCATGCTAGAGTATCGGAGAGGAAAGCGGAATTCCTAGTGTAGCGGTGA  
AATGCGTAGATATTAGGAGGAACACCCAGTGGCGAAGGCGGCTTTCTGGACGCAACTGACGCTGAGGCGGAAAGCCAGG  
GGAGC

>ASV:562:Genus:Bacteroides

TACGGAGGATCCGAGCGTTATCCGGATTTATTGGGTTTAAAGGGAGCGTAGGCGGGTCTTAAGTCAGTTGTGAAAGTTT  
GCGGCTCAACCGTAAATTCAGTTGATACTGGGCGCCTTGTAGTGCAGCATAGGTAGGCGGAATTCGTGGTGTAGCGGTG  
AAATGCTTAGATATCACGAAGAACTCCTATTGCGAAGGCAGCTTACTGGACTGTAAGTACGCTGATGCTCGAAAGTGTG  
GGTAT

>ASV:563:Genus:Lachnoclostridium

TACGTAGGGGGCAAGCGTTATCCGGATTTACTGGGTGTAAAGGGAGCGTAGACGGAAGTCAAGTCTGAAGTGAAGGCC  
GGGGCTCAACCCGGGACTGCTTTTGGAACTGTATTTCTAGAGTGTGCTGGAGAGGTAAGTGAATTCCTAGTGTAGCGGTG  
AAATGCGTAGATATTAGGAGGAACACCCAGTGGCGAAGGCGGCTTACTGGACAGTACTGACGTTGAGGCTCGAAAGCGTG  
GGGAG

>ASV:564:Species:aquatica/puraquae/saccharophila

TACGTAGGGTGAAGCGTTAATCCGGAATTACTGGGCGTAAAGCGTGCAGGCGGTTATGCAAGACAGAGGTGAAATCCC  
CGGGCTCAACCTGGGAACTGCTTTTGGAACTGTATTTCTAGAGTGTGCTGGAGAGGTAAGTGAATTCCTAGTGTAGCGGTG  
AAATGCGTAGATATTAGGAGGAACACCCAGTGGCGAAGGCAATCCCCTGGACCTGACTGACGCTCATGCACGAAAGCGTG  
GGGAG

>ASV:565:Family:Lachnospiraceae

TACGTAGGGGGCAAGCGTTATCCGGATTTACTGGGTGTAAAGGGAGCGTAGGCGGTCTGGCAAGCCAGAAGTGAAGGCC  
GGGGCTTAAACCCGGGACTGCTTTTGGAACTGTATTTCTAGAGTGTGCTGGAGAGGTAAGTGAATTCCTAGTGTAGCGGTG  
AAATGCGTAGATATTAGGAGGAACACCCAGTGGCGAAGGCGGCTTACTGGACGATAACTGACGCTGAGGCTCGAAAGCGTG  
GGGAG

>ASV:566:Genus:DTU089

TACGTAGGGAGCAAGCGTTGTCCGGAATTACTGGGTGTAAAGGGTGCAGTGGCGGATCTGCAAGTCAGTGTGAAATCCC  
AGGGCTTAAACCTGGAAGTGTATTGAAACTGTGGGCTTGTAGTGTAGGAGGAGGCGGAAATTCCTAGTGTAGCGGTG  
AAATGCGTAGATATTAGGAGGAACACCCAGTGGCGAAGGCGGCTTACTGGGCTTAACTGACGCTGAGGCACGAAAGCATG  
GGTAG

>ASV:567:Genus:Prevotella\_9

TACGGAAGGTCCGGGCGTTATCCGGATTTATTGGGTTTAAAGGGAGCGTAGGCCGGAGATTAAGCGTGTGTGAAATGTA  
GGCGCTCAACGTCTGCACTGCAAGCGGAACTGGTTTCCTTGTAGTGCACAAAGTGGGCGGAATTCGTGGTGTAGCGGTG  
AAATGCTTAGATATCACGAAGAACTCCGATTGCGAAGGCAGCTCACTGGAGCGCAACTGACGCTGAAGCTCGAAAGTGGC  
GGTAT

>ASV:568:Genus:Megasphaera

TACGTAGGTGGCAAGCGTTGTCCGGAATTATTGGGCGTAAAGGGCGCGCAGGCGGCGTCTGAAGTCCGTTAAAAGTGC  
GGGGCTTAAACCCGTGAGGGGACCGAACTGCATGCTAGAGTATCGGAGAGGAAAGCGGAATTCCTAGTGTAGCGGTGA  
AATGCGTAGATATTAGGAGGAACACCCAGTGGCGAAGGCGGCTTTCTGGGCGCAACTGACGCTGAGGCGGAAAGCCAGG  
GGAGC

>ASV:569:Genus:Tyzzerella\_4

TACGTATGGTGAAGCGTTATCCGGATTTACTGGGTGTAAAGGGAGCGTAGACGTTGTGTAAGTCTGATGTGAAAGGCC  
GGGGCTCAACCCGGGACTGCATTGGAAGTATGTAAGTGTGCTGGAGAGGTAAGCGGAATTCCTAGTGTAGCGGTG  
AAATGCGTAGATATTAGGAGGAACACCCAGTGGCGAAGGCGGCTTACTGGACGATCACTGACGTTGAGGCTCGAAAGTGTG

GGGAG  
>ASV:570:Genus:Bacteroides  
TACGGAGGATCCGAGCGTTATCCGGATTTATTGGGTTTAAAGGGAGCGTAGATGGATGTTTAAAGTCAGTTGTGAAAAGTTT  
GCGGCTCAACCGTAAAATTGCAGTTGATACTGGATATCTTGAGTGCAAGTTGAGGCAGGCAGGAAATTCGTGGTGTAGCGGTG  
AAATGCTTAGATATCACGAAGAAGCTCCGATTGCGAAAGCAGCTGCTAAGCTGCAACTGACATTGAGGCTCGAAAAGTGTG  
GGTAT  
>ASV:571:Genus:Parabacteroides  
TACGGAGGATCCGAGCGTTATCCGGATTTATTGGGTTTAAAGGGTGCCTAGGCGGCCTTTTAAAGTCAGCGGTGAAAAGTCT  
GTGGCTCAACCATAGAAATTGCCGTTGAAACTGGGGGCTTGAGTATGTTTGAGGCAGGCAGGAAATGCGTGGTGTAGCGGTG  
AAATGCTTAGATATCACGAAGAAGCTCCGATTGCGAAGGCAGCTTGTGGACTGTAACGACGCTGATGCTCGAAAAGTGTG  
GGTAT  
>ASV:572:Genus:Lachnospiraceae\_UCG-003  
TACGTAGGGGGCAAGCGTTATCCGGATTTACTGGGTGTAAGGGAGCGTAGATGGCATGGCAAGTCTGAAGTAAAAGCCC  
GGGGCTTAAACCCGGGACTGCTTTGAAACTGTTAAGCTAGAGTGCAAGGAGGTAAGCGGAATTCCTAGTGTAGCGGTG  
AAATGCGTAGATATTAGGAGGAACACCGGTGGCGAAGGCGGCTTACTGGACTGTAACGACATTGAGGCTCGAAAAGCGTG  
GGGAG  
>ASV:573:Species:sanguinis  
TACGTAGGTGGCGAGCGTTATCCGGATTTATTGGGCTTAAAGAGCGCGCAGGTGGTTGATTAAGTCTGATGTGAAAAGCCC  
ACGGCTTAAACCGTGGAGGGTATTGAAACTGGTCAACTGAGTGCAAGAGGGAAGTGAATTCATGTGTAGCGGTG  
AAATGCGTAGATATTAGGAGGAACACCGTGGCGAAGGCGGCTTCTGGTCTGTAACGACACTGAGGCGCGAAAAGCGTG  
GGGAG  
>ASV:574:Order:Rhodospirillales  
TACGAAGGGGGCGAGCGTTGTTCCGGAATTTACTGGGCTTAAAGGGTGTGTAGGCGGTTATGTAAGATAGCGGTGAAAATCCC  
GGGGCTTAAACCTCGGAATAGCGTTATAACTATGTAGCTAGAGTTATGGAGAGGATAGCGGAATACCCAGTGTAGAGGTG  
AAATGCTTAGATATTGGGTAGAACACCGGTGGCGAAGGCGGCTTACTGGCCATATACTGACGCTGAGGCACGAAAAGCATG  
GGGAT  
>ASV:575:Genus:Bacteroides  
TACGGAGGATCCGAGCGTTATCCGGATTTATTGGGTTTAAAGGGAGCGTAGGCGGATGCTTAAAGTCAGTTGTGAAAAGTTT  
GCGGCTCAACCGTAAAATTGCAGTTGATACTGGGTGCTTGAGTACAGTAGAGGCAGGCAGGAAATTCGTGGTGTAGCGGTG  
AAATGCTTAGATATCACGAAGAAGCTCCGATTGCGAAGGCAGCTGCTGGACTGTAACGACGCTGATGCTCGAAAAGTGTG  
GGTAT  
>ASV:576:Genus:Agathobacter  
TACGTATGGTGCAAGCGTTATCCGGATTTACTGGGTGTAAGGGAGCGCAGGCGGTGCGGCAAGTCTGATGTGAAAAGCCC  
GGGGCTCAACCTCGGTACTGCATTGAAACTGTCGTACTAGAGTGTCGGAGGGGTAAGCGGAATTCCTAGTGTAGCGGTG  
AAATGCGTAGATATTAGGAGGAACACCGTGGCGAAGGCGGCTTACTGGACGATAACTGACGCTGAGGCTCGAAAAGCGTG  
GGGAG  
>ASV:577:Genus:Lachnoclostridium  
TACGTAGGGGGCAAGCGTTATCCGGATTTACTGGGTGTAAGGGAGCGTAGACGGTAATGCAAGTCTGGAGTAAAACCC  
GGGGCTCAACCCGGGACTGCTTTGAAACTGTGTAAGTACTGAGTGTCGGAGAGGCAAGTGAATTCCTAGTGTAGCGGTG  
AAATGCGTAGATATTAGGAGGAACACCGTGGCGAAGGCGGCTTACTGGACGATGACTGACGTTGAGGCTCGAAAAGCGTG  
GGGAG  
>ASV:578:Family:Lachnospiraceae  
TACGTAGGGGGCAAGCGTTATCCGGATTTACTGGGTGTAAGGGAGCGTAGACGGATGTGCAAGTCTGAAGTAAAAGCCC  
GGGGCTCAACCCGGGACTGCTTTGAAACTGTGTATCTGGAGTGCCGGAGAGGTAAGCGGAATTCCTAGTGTAGCGGTG  
AAATGCGTAGATATTGGGAGGAACACCGTGGCGAAGGCGGCTTACTGGACGTAACGACGTTGAGGCTCGAAAAGCGTG  
GGGAG  
>ASV:579:Genus:Blautia  
TACGTAGGGGGCAAGCGTTATCCGGATTTACTGGGTGTAAGGGAGCGTAGACGGAAGCAAGTCTGATGTGAAAAGCCC  
GGGGCTTAAACCCGGGACTGCAATTGAAACTGTTTTCTAGAGTGCCGGAGAGGTAAGCGGAATTCCTAGTGTAGCGGTG  
AAATGCGTAGATATTAGGAGGAACACCGTGGCGAAGGCGGCTTACTGGACGTAACGACGTTGAGGCTCGAAAAGCGTG  
GGGAG  
>ASV:580:Species:paravirosa  
TACGGGGGATGCGAGCGTTATCCGGATTTATTGGGTTTAAAGGGCGCGTAGGCGGGACGCCAAGTCAGCGGTAAAAGACT  
GCAGCTAAACTGTAGCACCGGTTGAAACTGGCGACCTGGAGACGAGACGAGGGAGGCAGGAAACAGTGAAGTAGCGGTGA  
AATGCTTAGATATCACTTGAACCCCGATAGCGAAGGCAGCTTCCCAGGCTCGATCTGACGCTGATGCGCGAGAGCGGTG  
GTAGC  
>ASV:581:Genus:Sellimonas  
TACGTAGGGGGCAAGCGTTATCCGGATTTACTGGGTGTAAGGGAGCGTAGACGGCATTGCAAGTCTGGAGTAAAACCC  
GGGGCTCAACCCGGGATTGCTTTGAAACTGTGAGCTAGAGTACC GGAGAGGCAAGTGAATTCCTAGTGTAGCGGTG  
AAATGCGTAGATATTAGGAGGAACACCGTGGCGAAGGCGGCTTGTGGACGTAACGACGTTGAGGCTCGAAAAGCGTG  
GGGAG  
>ASV:582:Genus:Barnesiella  
TACGGAGGATGCAAGCGTTATCCGGATTTATTGGGTTTAAAGGGTGCCTAGGCGGCACGCCAAGTCAGCGGTGAAAATTTT  
CGGGCTCAACCCGGAGTGTGCCGTTGAAACTGGCGAGCTAGAGTGCAAGAGGCAGGCAGGAAATGCGTGGTGTAGCGGTG  
AAATGCATAGATATCACGAGAACCCGATTGCGAAGGCAGCTGCTAGGGTGCACAGACGCTGAGGCACGAAAAGCGTG  
GGTAT  
>ASV:583:Species:crescentus/flavus/segnis/vibrioides  
TACGAAGGGGGCTAGCGTTGCTCGGAATTTACTGGGCTTAAAGGGAGCGTAGGCGGACTGTTTAGTCAGAGGTAAAAGCCC

AGGGCTCAACCTTGAATTGCCTTTGATACTGGCAGTCTTGGAGTACGGAAGAGGTATGTGAACTCCGAGTGTAGAGGTG  
AAATTCGTAGATATTCGGAAGAACCACAGTGGCGAAGGCGACATACTGGTCCGTTACTGACGCTGAGGCTCGAAAGCGTG  
GGGAG

>ASV:584:Family:Ruminococcaceae

TACGTAGGTGGCAAGCGTTGTCCGGAATTACTGGGTGTAAGGGAGCGCAGGCGGGGAGCCAAGTCAGCTGTGAAAACCTA  
CGGGCTTAACCTGTAGACTGCAGTTGAAACTGGTTTTCTTGGAGTGAAGTAGAGGTTGGCGGAATTCAGTGTAGCGGTG  
AAATGCGTAGATATTCGGAAGAACACCAGTGGCGAAGGCGGCAACTGGGCTTAACTGACGCTGAGGCTCGAAAGTGTG  
GGGAG

>ASV:585:Genus:Parabacteroides

TACGGAGGATGCGAGCGTTATCCGGATTTATTGGGTTAAAGGGTGCAGTGGTTGTTTTTAAGTCAGCGGTGAAAAGTTT  
GTGGCTCAACCATAAAATTGCCGTTGAAACTGGAAGACTTGGAGTGTGTTTGGAGTAGCGGAATGCGTGGTGTAGCGGTG  
AAATGCATAGATATCACGCAGAACTCCGATTGCGAAGGCAGCTTAAACCATAACTGACACTGAAGCACGAAAGCGTG  
GGGAT

>ASV:586:Genus:Ruminococcaceae\_UCG-010

TACGTAGGTGGCGAGCGTTATCCGGAATTACTGGGTGTAAGGGTGTAGGCGGGCAAACAAGTCAGATGTGAAAACCTA  
TGGGCTTAACCATAGCTGCATTTGAAACTGTATGTCTTGGAGATGGGAGAGGTAATGGAATTCGCGGTGTAGCGGTG  
AAATGCGTAGATATTCGGAAGAACACCAGTGGCGAAGGCGGTTTACTGGACCATTACTGACGCTGAGACACGAAAGCGTG  
GGGAG

>ASV:587:Species:salivarius

TACGTAGGTCCGAGCGTTGTCCGGATTTATTGGGCGTAAAGCGAGCGCAGGCGGTTTTGATAAGTCTGAAGTTAAAGGCT  
GTGGCTCAACCATAGTTTCGCTTTGAAACTGTCAAACCTTGGAGTGCAGAGGGGAGAGTGAATTCATGTGTAGCGGTGA  
AATGCGTAGATATATGGAGGAACACCAGTGGCGAAAGCGGCTCTCTGGTCTGCAACTGACGCTGAGGCTCGAAAGCGTG  
GGAG

>ASV:588:Genus:Prevotellaceae\_NK3B31\_group

TACGGAAGGTCCGGGCGTTATCCGGATTTATTGGGTTAAAGGGAGCGCAGGCGGTTAAGCGTGTCTGTAATTC  
GTCGCTCAACGGCGGACGTGCGGCGGCAACTGGTCCACTTGGAGTACGCGGGACGTTGGCGGAATTCGTTGTAGCGGTG  
AAATGCTTAGATATCACGAAGAACCAGTGGCGAAGGCAGCTGACGGTAGCGCAACTGACGCTGAGGCTCGAAAGTGGC  
GGTAT

>ASV:589:Genus:Holdemania

TACGTAGGTGGCGAGCGTTATCCGGAATTATTGGGCGTAAAGGGTGCAGGCGGTTTTTAAGTTAAGGTGAAAGCGT  
GGGGCTTAACCCCATATAGCCTTAGAAACTGAGAGACTAGAGTACAGGAGAGGGCAATGGAATTCATGTGTAGCGGTAA  
AATGCGTAGATATATGGAGGAACACCAGTGGCGAAGGCGGTTGCCTGGCCTGTAAGTACGCTCATGCACGAAAGCGTG  
GGAG

>ASV:590:Genus:Shuttleworthia

TACGTATGGAGCAAGCGTTATCCGGATTTACTGGGTGTAAGGGAGCGTAGGCGGTGTATAAGTCTGATGTGAAAGCCC  
GGGGCTCAACCGCGGACTGCATTGAAACTGTAGGACTGGAGTGTGCGGAGGGGTAAGTGAATTCCTAGTGTAGCGGTG  
AAATGCGTAGATATTAGGAGGAACACCAGTGGCGAAGGCGGTTACTGGACGACAACGACGCTGAGGCTCGAAAGCGTG  
GGGAG

>ASV:591:Genus:Blautia

TACGTAGGGGGCAAGCGTTATCCGGATTTACTGGGTGTAAGGGAGCGTAGACGGTGTGGCAAGTCTGATGTGAAAGGCA  
TGGGCTCAACCTGTGGACTGCATTGAAACTGTATGCTTGGAGTGCAGGAGGGGTAAGCGGAATTCCTAGTGTAGCGGTG  
AAATGCGTAGATATTAGGAGGAACACCAGTAGCGAAGGCGGTTACTGGACGGTAACGACGTTGAGGCTCGAAAGCGTG  
GGGAG

>ASV:592:Genus:Prevotella\_2

TACGGAAGGTCCGGGCGTTATCCGGATTTATTGGGTTAAAGGGAGCGTAGGCGGTTTTGTAAGCGTGTGTGAAATGTC  
GGGGCTCAACCTGGGCAATGACGCGCAACTGGCAGACTTGGAGTGCAGGGAAGTAGCGGAATTCGTCGTGTAGCGGTG  
AAATGCTTAGATATGACGAAGAACCAGTGGCGAAGGCGGCTGCTGTAGCGTAACGACGCTGAAGCTCGAAAGCGTG  
GGTAT

>ASV:593:Species:atypica/parvula

TACGTAGGTGGCAAGCGTTGTCCGGAATTATTGGGCGTAAAGCGCGCAGGCGGATCAGTTAGTCTGTCTTAAAAGTTC  
GGGGCTTAACCCCGTGTAGGATGGAACCTGCTGATCTAGAGTATCGGAGAGGAAAGTGAATTCCTAGTGTAGCGGTGA  
AATGCGTAGATATTAGGAAGAACCACAGTGGCGAAGGCGACTTCTGGACGAAAACGACGCTGAGGCGGAAAGCCAGG  
GGAG

>ASV:594:Genus:Paraprevotella

TACGGAAGATGCGAGCGTTATCCGGATTTATTGGGTTAAAGGGAGCGTAGGCGGGCTTTTAAGTCAGCGGTCAAATGTC  
GTGGCTCAACCATGTCAAGCGTTGAAACTGTAAGCCTTGGAGTCTGCACAGGGCACATGGAATTCGTGGTGTAGCGGTGA  
AATGCTTAGATATCACGAAGAACCAGTGGCGAAGGCAATTTGTCGGGGGCGACACTGACGCTGAGGCTCGAAAGTGGC  
GTATC

>ASV:595:Order:Chloroplast

TACAGAGGATGCAAGCGTTATCCGGAATGATTGGGCGTAAAGCGTCTGTAGGTGGCTTTTTAAGTCCGCGTCAAATCCC  
AGGGCTCAACCTGGACAGGCGGTGGAACCTACCAAGCTGGAGTACGGTAGGGGAGAGGGAATTTCCGGTGGAGCGGTG  
AAATGCGTAGAGATCGGAAGAACCACCAAGCGGAAAGCACTCTGCTGGGCGGACACTGACACTGAGAGACGAAAGCTAG  
GGGAG

>ASV:596:Genus:Parabacteroides

TACGGAGGATCCGAGCGTTATCCGGATTTATTGGGTTAAAGGGTGCAGTGGTTGTTTTAAGTCAGCGGTGAAAAGTCT  
GTGGCTCAACCATAGAAATTGCCGTTGAAACTGGGGGCTTGGAGTATGTTTTGAGGAGCGGGAATGCGTGGTGTAGCGGTG  
AAATGCTTAGATATCACGAAGAACCAGTGGCGAAGGCAGCTTACTGGATTGTAACGACGCTGATGCTCGAAAGTGTG  
GGTAT

>ASV:597:Order:Clostridiales  
TACGTAGGGGGCGAGCGTTGTCCGGAATTACTGGGCGTAAAGGGCGCGTAGGCGGCCAATTAAGTTAGATGTGAAATCCC  
CGGGCTTAACCTGGGTGTTGCATTTAAACTGATAGGCTTGAGTGCAGGAGAGGGAAGCGGAATTCCTAGTGTAGCGGTG  
GAATGCGTAGATATTAGGAGGAACACCAGTGGCGAAGGCGGCTTTCTGGACTGTAAC TGACGCTGAGGCGCGAGAGCGTG  
GGGAG

>ASV:598:Species:salyersiae  
TACGGAGGATCCGAGCGTTATCCGGATTTATTGGGTTTAAAGGGAGCGTAGGTGGACATGTAAGTCAGTTGTGAAAGTTT  
GCGGCTCAACCTGTGGACTGCATTGAAACTGTCATACCTTGAGTACAGTAGAGGTGGCGGAATTCGTGGTGTAGCGGTG  
AAATGCTTAGATATCACGAAGAACCAGTGGCGAAGGCGAGCTCACTGGACTGCAACTGACACTGATGCTCGAAAGTGTG  
GGTAT

>ASV:599:Genus:Blautia  
TACGTAGGGGGCAAGCGTTATCCGGATTTACTGGGTGTAAGGGAGCGTAGACGGTGTGACAAGTCTGATGTGAAAGGCA  
TGGGCTCAACCTGTGGACTGCATTGAAACTGTCATACCTTGAGTGCAGGAGGGTAAGCGGAATTCCTAGTGTAGCGGTG  
AAATGCGTAGATATTAGGAGGAACACCAGTGGCGAAGGCGGCTTACTGGACGGTAAC TGACGTTGAGGCTCGAAAGCGTG  
GGGAG

>ASV:600:Genus:Subdoligranulum  
AACGTAGGGTGAAGCGTTGTCCGGAATTACTGGGTGTAAGGGAGCGCAGGCGGACC GGCAAGTTGGAAGTAAAAC TA  
TGGGCTCAACCTGTGGACTGCATTGAAACTGTCATACCTTGAGTGCAGGAGGGTAAGCGGAATTCCTAGTGTAGCGGTG  
GAATGCGTAGATATTAGGAGGAACACCAGTGGCGAAGGCGGCTTACTGGACGGTAAC TGACGTTGAGGCTCGAAAGCGTG  
GGTAT

>ASV:601:Genus:Blautia  
TACGTAGGGGGCAAGCGTTATCCGGATTTACTGGGTGTAAGGGAGCGTAGACGGTGTGGCAAGTCTGATGTGAAAGGCA  
TGGGCTCAACCTGTGGACTGCATTGAAACTGTCATACCTTGAGTGCAGGAGGGTAAGCGGAATTCCTAGTGTAGCGGTG  
AAATGCGTAGATATTAGGAGGAACACCAGTGGCGAAGGCGGCTTACTGGACGGTAAC TGACGTTGAGGCTCGAAAGCGTG  
GGGAG

>ASV:602:Species:faecihominis  
TACGGGGGATCGAGCGTTATCCGGATTTATTGGGTTTAAAGGGCGCGTAGGCGGGACGCCAAGTCAGCGGTAAAAGACT  
GCAGCTAAACCTGTGGACTGCATTGAAACTGTCATACCTTGAGTGCAGGAGGAGGCGGAACAAGTGAAGTGTAGCGGTG  
AATGCTTAGATATCACTTGAACCCCGATAGCGAAGGCGAGCTTCCAGGCTCGATCTGACGCTGATGCGCGAGAGCGTGG  
GTAGC

>ASV:603:Genus:Prevotella\_9  
TACGGAAAGGTCCGGCGTTATCCGGATTTATTGGGTTTAAAGGGAGCGTAGGCCGGAGATTAAGCGTGTGTGAAATGTA  
GATGCTCAACATCTGAACTGCAGCGGAACTGGTTTCTTGAGTACGCATAAAGTGGGCGGAATTCGTGGTGTAGCGGTG  
AAATGCTTAGATATCACGAAGAACCAGTGGCGAAGGCGAGCTCACTGGGGCGCAACTGACGCTGAAGCTCGAAAGCGCG  
GGTAT

>ASV:604:Order: Mollicutes\_RF39  
TACGTAGGGGGCGAGCGTTATCCGGATTTATTGGGCGTAAAGCGTGTGTAGGCGGTTTGTAAAGTCTAAGATCAAAGCCC  
GAGGCTCAACCTCGGTTCTGCTTAGAAACTGGCAGACTTGAGTGCAGTAGAGGCAAGTGGAAATTCCTAGTGTAGCGGTTA  
AATGCGTAGATATTAGAAGGAACACCAGTGGCGAAGGCGGCTTCTGGGCTGTACTGACGCTGAGACACGAAAGCGTGG  
GGAGC

>ASV:605:Species:alaskensis/bauzanensis/chilensis/fribergensis/ginsengisoli/italica/  
panaciterrae  
TACGGAGGGAGCTAGCGTTGTTCGGAATTACTGGGCGTAAAGCGCGCGTAGGCGGTTTTTTAAGTCAGAGGTGAAAGCCC  
AGTGCTCAACACTGGAAGTGCCTTTGAAACTGAAAACCTGAACTCTTGAGAGGTGAGTGGAAATTCAGTGTAGAGGTG  
AAATTCGTAGATATTGGAAGAACCAGTGGCGAAGGCGACTGACTGGACAAGTATTGACGCTGAGGTGCGAAAGCGTG  
GGGAG

>ASV:606:Genus:Agathobacter  
TACGTATGGTGAAGCGTTATCCGGATTTACTGGGTGTAAGGGAGCGCAGGCGGTGCGGCAAGTCTGATGTGAAAGCCC  
GGGGCTCAACCCGGTACTGCATTGAAACTGTCATACCTAGAGTGTGCGGAGGGTAAGCGGAATTCCTAGTGTAGCGGTG  
AAATGCGTAGATATTAGGAGGAACACCAGTGGCGAAGGCGGCTTACTGGACGATAACTGACGCTGAGGCTCGAAAGCGTG  
GGGAG

>ASV:607:Genus:Bacteroides  
TACGGAGGATCCGAGCGTTATCCGGATTTATTGGGTTTAAAGGGAGCGTAGGTGGACAGTAAAGTCAGTTGTGAAAGTTT  
GCGGCTCAACCTGAAATTGCAGTTGATACTGGCTGTCTTGAGTACAGTAGAGGTGGCGGAATTCGTGGTGTAGCGGTG  
AAATGCTTAGATATCACGAAGAACCAGTGGCGAAGGCGAGCTCACTGGACTGCAACTGACACTGATGCGCGAAAGTGTG  
GGTAT

>ASV:608:Genus:Parasutterella  
TACGTAGGGTGCAGCGTTAATCCGGAATTACTGGGCGTAAAGGGTGCAGGCGGTTGAGTAAGACAGATGTGAAATCCC  
CGAGCTTAACCTCGGGAATAGCATATGTGACTGCTCGACTAGAGTGTGTCAGAGGGAGGTGGAATTCACGTTGTAGCAGTG  
AAATGCGTAGATATTGGAAGAACCAGTGGCGAAGGCGAGCTTCTGGGACATAACTGACGCTCAGGCACGAAAGCGTG  
GGGAG

>ASV:609:Genus:Bacteroides  
TACGGAGGATCCGAGCGTTATCCGGATTTATTGGGTTTAAAGGGAGTGTAGGCGGATTTAAGTCAAGTGTGAAAGTTT  
GCGGCTCAACCTGAAATTGCAGTTGATACTGGCAGTCTTGAGTGCAGTAGAGGTGGCGGAATTCGTGGTGTAGCGGTG  
AAATGCTTAGATATCACGAAGAACCAGTGGCGAAGGCGAGCTCACTGGAGTGAAC TGACGCTGATGCTCGAAAGTGTG  
GGTAT

>ASV:610:Genus:Ruminococcaceae\_UCG-005  
TACGTAGGTGGCAAGCGTTGTCCGGAATTACTGGGTGTAAGGGCGGTAGGCGGAGCTGCAAGTCAGATGTGAAATCTC

CGGGCTTAACCCGAAACTGCATTTGAACTGTAGTCCTTGTAGTATCGGAGAGGCAAGCGGAATTCCTAGTGTAGCGGTG  
AAATGCGTAGATATTAGGAGGAACACCAGTGGCGAAGGCGGCTTGTCTGGACGACAACGTACGCTGAGGCGCAAAGCGTG  
GGGAG  
>ASV:611:Genus:Ruminiclostridium\_5  
TACGTAGGGAGCGAGCGTTGTCCGGATTTACTGGGTGTAAGGGTGCCTAGGCGGAAGCAAGTCAGTAGTAAATCCA  
TGGGCTTAACCCGTAAGTGCATTTGAACTGTTTTCTTGTAGTGAAGTAGAGGTAGGCGGAATTCCTAGTGTAGCGGTG  
AAATGCGTAGAGATCGGAGGAACACCAGTGGCGAAGGCGGCTACTGGGCTTAACTGACGCTGAGGCACGAAAGCATG  
GGTAG  
>ASV:612:Genus:Lachnoclostridium  
TACGTAGGGGGCAAGCGTTATCCGGATTTACTGGGTGTAAGGGGAGCGTAGACGGCGAAGCAAGTCTGAAGTAAAACCC  
AGGGCTCAACCTGGGACTGCTTTGAACTGTTTTGCTAGAGTGTGGAGAGGTAAGTGAATTCCTAGTGTAGCGGTG  
AAATGCGTAGATATTAGGAGGAACACCAGTGGCGAAGGCGGCTTACTGGACAGTAACGTACGCTTGGGCTCGAAAGCGTG  
GGGAG  
>ASV:613:Genus:Bradyrhizobium  
TACGAAGGGGCTAGCGTTGTCCGGAATCACTGGGCGTAAAGGGTGCCTAGGCGGGTCTTAAAGTCAGGGGTGAAATCCT  
GGAGCTCAACTCCAGAACTGCCTTTGATACTGAAGATCTTGTAGTTCGGGAGAGGTGAGTGAAGTGCAGTGTAGAGGTG  
AAATTCGTAGATATTCGCAAGAACACCAGTGGCGAAGGCGGCTACTGGCCGATACTGACGCTGAGGCACGAAAGCGTG  
GGGAG  
>ASV:614:Genus:Moheibacter  
TACGGAGGGTGCAAGCGTTATCCGGATTCATTGGGTTAAAGGGTCCGAGGCGGGCTTGTAAAGTCAGGGGTGAAAGCCG  
GCAGCTTAACTGTGCAACTGCCTTTGATACTGCAAGTCTTGTAGTGTGAGGTTGAAGTAGCTGGAATGTGTAGTGTAGCGGTG  
AAATGCTTAGATATTACACAGAACACCAGTGGCGAAGGCGGTTACTAAGTCTTAACTGACGCTGAGGGACGAAAGCGTG  
GGGAG  
>ASV:615:Genus:Rikenellaceae\_RC9\_gut\_group  
TACGGGGGATGCGAGCGTTATCCGGATTCATTGGGTTAAAGGGTGCCTAGGCTGTGCGTCAAGTCGGGGGTGAAATCC  
GGTGTCAACACCGGGGCTGCCTTTGATACTGTGCGCTGGAGTGCAGGATGCCGCGGAGGAATGAGTGGTGTAGCGGTG  
AAATGCTTAGATATCACTCAGAACACCAGTGGCGAAGGCATCTGGCGAATCCGTAACGTACGCTGAGGCACGAAAGCGTG  
GGGAT  
>ASV:616:Species:aerosaccus  
TACAGAGGGTGCAGCGTTAATCCGGAATTAAGGCGAGTGTAGGTGGCTCATTAAAGTCACATGTGAAATCCC  
CGGGCTTAACCTGGGAACTGCATGTGATACTGGTGGTGTAGAAATGTGAGAGGGAAGTAGAATTCAGGTGTAGCGGTG  
GAAATGCGTAGAGATCTGGAGGAATACCGATGGCGAAGGCGAGCTTCTGGCATAATATTGACACTGAGATTCGAAAGCGT  
GGGTA  
>ASV:617:Genus:Ruminococcaceae\_UCG-005  
TACGTAGGTGCAAGCGTTATCCGGATTTACTGGGTGTAAGGGGCGTGTAGGCGGGAGAGCAAGTCAGAAGTAAATCCA  
TGGGCTTAACCCATGAAGTGCATTTGAACTGTTCTTCTTGTAGTATCGGAGAGGCGAGGCGGAATTCCTAGTGTAGCGGTG  
AAATGCGTAGATATTAGGAGGAACACCAGTGGCGAAGGCGGCTTGTCTGGACGACAACGTACGCTGAGGCGCAAAGCGTG  
GGGAG  
>ASV:618:Genus:Agathobacter  
TACGTATGGTGAAGCGTTATCCGGATTTACTGGGTGTAAGGGGAGCGCAGGTGGTGCAGGCAAGTCTGATGTGAAAGCCC  
GGGGCTCAACCCGGTACTGCATTGGAAGTGTGCTACTAGAGTGTGCGGAGGGTAAGCGGAATTCCTAGTGTAGCGGTG  
AAATGCGTAGATATTAGGAGGAACACCAGTGGCGAAGGCGGCTTACTGGACGATAACGTACGCTGAGGCTCGAAAGCGTG  
GGGAG  
>ASV:619:Genus:Ruminococcaceae\_UCG-014  
TACGTAGGGAGCGAGCGTTATCCGGATTTATTGGGTGTAAGGGTGCCTAGACGGGAAGATAAGTTAGTTGTGAAATCCC  
TCGGCTTAACTGAGGAACTGCAACTAAAATGTTTTCTTGTAGTACTGGAGAGGAAAGTGAATTCCTAGTGTAGCGGTG  
AAATGCGTAGATATTAGGAGGAACACCAGTGGCGAAGGCGACTTTCTGGACAGAACTGACGTTGAGGCACGAAAGTGTG  
GGGAG  
>ASV:620:Genus:Ruminococcaceae\_UCG-014  
TACGTAGGGAGCGAGCGTTATCCGGATTTATTGGGTGTAAGGGTGCCTAGACGGGAATACAAGTTAGTTGTGAAATACC  
TCGGCTTAACTGAGGAACTGCAACTAAAATATATTTCTTGTAGTACAGGAGAGGTAAGTGAATTCCTAGTGTAGCGGTG  
AAATGCGTAGATATTAGGAGGAACACCAGTGGCGAAGGCGACTTACTGGACTGAAACTGACGTTGAGGCACGAAAGTGTG  
GGGAG  
>ASV:621:Genus:Roseburia  
TACGTATGGTGAAGCGTTATCCGGATTTACTGGGTGTAAGGGGAGCGCAGGCGGTACGGCAAGTCTGATGTGAAAGCCC  
GGGGCTCAACCCGGTACTGCATTGGAAGTGTGCGACTAGAGTGTGCGGAGGGTAAGCGGAATTCCTAGTGTAGCGGTG  
AAATGCGTAGATATTAGGAGGAACACCAGTGGCGAAGGCGGCTTACTGGACGATTACTGACGCTGAGGCTCGAAAGCGTG  
GGGAG  
>ASV:622:Genus:Barnesiella  
TACGGAGGATGCGAGCGTTATCCGGATTTATTGGGTTAAAGGGTGCCTAGGCGGCACGCCAAGTCAGCGGTGAAATTTCC  
CGGGCTCAACCCGACTGTGCCGTTGAACTGGCGAGCTAGAGTGCACAAGAGGCGAGGCGGAATGCGTGGTGTAGCGGTG  
AAATGCATAGATATACGCAAGAACCCGATTGCGAAGGCGAGCTGCTAGGGTGCACAGACGCTGAGGCACGAAAGCGTG  
GGTAT  
>ASV:623:Family:Peptococcaceae  
TACGTAGGGAGCGAGCGTTGTCCGGAATTAAGGCGGCTGTAAGGGGAGCGGCAAGTCTGATGTGAAAGTCTGAAAGTCT  
CGGGCTTAACTGGAGACTGCACTTTAACTGGATTTCTTGGGGCAGGAGAGGAAAGTGAATTCCTAGTGTAGCGGTG  
AAATGCGTAGATATTAGGAGGAACACCAGTGGCGAAGGCGACTTTCTGGACTGTACCTGACGCTGAGGCGCAAAGCGTG  
GGGAG

>ASV:624:Genus:Ruminococcaceae\_UCG-004  
TACGTAGGGAGCAAGCGTTATCCGGATTTACTGGGTGTAAGGGCGTGTAGGCGGGAGTGAAGTCAGATGTGAAAACCTA  
TGGGCTCAACCCATAGCCTGCATTTGAAACTGTACTTCTTGAGTACTGGAGAGGCAGGCGGAATTCCTGTGTAGCGGTG  
AAATGCGTAGATATACGGAGGAACACCACTGGCGAAGGCGGCTTCTGGACAGCAACTGACGCTGAGGCGCAAAGCGTG  
GGGAG

>ASV:625:Order:Clostridiales  
TACGTAGGGGGCGAGCGTTGTCCGGAATTTACTGGGCGTAAAGGGCGCGTAGGCGGCATATTAAGTTAGATGTGAAATTC  
CGGGCTTAACCCGAGGACTGCTTTTGGAACTGATAAGCTTGAGTCCGGAGAGGAAAGCGGAATTCCTAGTGTAGCGGTG  
AAATGCGTAGATATTAGGAGGAACATCAGTGGCGAAGGCGGCTTCTGGACGGTAAGTACGCTGAGGCGCAAAGCGTG  
GGTAG

>ASV:626:Family:Lachnospiraceae  
TACGTAGGGGGCAAGCGTTATCCGGATTTACTGGGTGTAAGGGAGCGTAGGTGGCGATGCAAGCCAGAAGTAAAACCC  
GGGGCTCAACCCGAGGACTGCTTTTGGAACTGTGTTGCTGAGTGCAGGAGAGGTAAGTGAATTCCTAGTGTAGCGGTG  
GAAATGCGTAGATATTAGGAGGAACACCGGTGGCGAAGGCGGCTTACTGGACTGTAAGTACGCTGAGGCTCGAAAGCGT  
GGGA

>ASV:627:Genus:Lachnoclostridium  
TACGTAGGGGGCAAGCGTTATCCGGATTTACTGGGTGTAAGGGAGCGTAGACGGCGAAGCAAGTCTGAAGTAAAACCC  
GGGGCTTAACCCGAGGACTGCTTTTGGAACTGTTTCTGAGTGCAGGAGAGGTAAGTGAATTCCTAGTGTAGCGGTG  
AAATGCGTAGATATTAGGAGGAACACCACTGGCGAAGGCGGCTTACTGGACAGTAAGTACGCTGAGGCTCGAAAGCGTG  
GGGAG

>ASV:628:Species:cateniformis  
TACGTAGGTGGCGAGCGTTATCCGGAATCATGGGCGTAAAGGGAGCGAGGCGCAATAGAGGTCTGCGGTGAAAGCTT  
GAAGCTAAACTTCAGTAAGCGGTGGAACCAAATAGCTAGAGTGCAGTAGAGGATCGTGAATTCCTAGTGTAGCGGTG  
AATGCGTAGATATTAGGAGGAACACCACTGGCGAAGGCGGCTTACTGGGCTGCAACTGACGCTCAGTCCGAAAGCGTG  
GGAG

>ASV:629:Genus:Verrucosipora  
GACGTAGGGCGCGAGCGTTGTCCGGATTTATGGGCGTAAAGAGCTCGTAGGCGGCTTGTGCGGTGCGACTGTGAAAACCC  
GCGGCTCAACTGCGGGCTGCAGTACGGGCGAGGCTAGAGTTCGGTAGGGGAGACTGGAATTCCTGGTGTAGCGGTG  
AAATGCGCAGATATCAGGAGGAACACCGGTGGCGAAGGCGGCTTCTGGGCCGATACTGACGCTGAGGAGCGAAAGCGTG  
GGGAG

>ASV:630:Genus:Lachnoclostridium  
TACGTAGGGGGCAAGCGTTATCCGGATTTACTGGGTGTAAGGGAGCGTAGACGGCGATGCAAGTCTGAAGTAAAACCC  
AGGGCTCAACCCGAGGACTGCTTTTGGAACTGTGTTGCTAGAGTGCAGGAGAGGTAAGTGAATTCCTAGTGTAGCGGTG  
AAATGCGTAGATATTAGGAGGAACACCACTGGCGAAGGCGGCTTACTGGACAGTAAGTACGCTGAGGCTCGAAAGCGTG  
GGGAG

>ASV:631:Genus:Intestinimonas  
TACGTAGGTGGCAAGCGTTATCCGGATTTACTGGGTGTAAGGGCGTGTAGGCGGGAAGGCAAGTCAAGTGTGAAAACCTA  
TGGGCTCAACTCATAGCCTGCATTTGAAACTGTTTTCTTGAGTGCAGGAGAGGCAATCGGAATTCCTGTGTAGCGGTG  
AAATGCGTAGATATACGGAGGAACACCACTGGCGAAGGCGGATTGCTGGACAGTAAGTACGCTGAGGCGCAAAGCGTG  
GGGAG

>ASV:632:Genus:Ruminococcaceae\_UCG-005  
TACGTAGGTGGCAAGCGTTGTCCGGAATTTACTGGGTGTAAGGGCGTGTAGGCGGAGTGAAGTCAAGTCAAGTGTGAAATCTC  
CGGGCTTAACCCGAAACTGCATTTGAAACTGTAGCCCTTGAAGTATCGGAGAGGCAAGCGGAATTCCTAGTGTAGCGGTG  
AAATGCGTAGATATTAGGAGGAACACCACTGGCGAAGGCGGCTTCTGGACGACAAGTACGCTGAGGCGCAAAGCGTG  
GGGAG

>ASV:633:Family:Enterobacteriaceae  
TACGGAGGGTCAAGCGTTAATCCGGAATTTACTGGGCGTAAAGCGCACGAGGCGGTCTGTTAAGTCAAGTGTGAAATCC  
CGGGCTCAACCTGGGAACTGCATCTGATACTGGCAGGCTTGAAGTCTCGTAGAGGGGGTGAATTCAGGTGTAGCGGTG  
AAATGCGTAGATCTGGAGGAATACCGGTGGCGAAGGCGGCCCCCTGGACGAAGACTGACGCTCAGGTGCGAAAGCGTG  
GGGAG

>ASV:634:Species:massiliensis  
TACGTAGGTGGCGAGCGTTATCCGGAATTTACTGGGCGTAAAGGGTGCAGGCGGTTTGAAGTTTAAAGTAAAAGCGT  
GGGGCTTAACCCATACAGCCTTAGAACTGTGAGTACAGGAGAGGGCAATGGAATTCCTAGTGTAGCGGTAA  
AATGCGTAGATATTAGGAGGAACACCACTGGCGAAGGCGGTTGCTGGCCTGTAAGTACGCTCATGCACGAAAGCGTG  
GGAG

>ASV:635:Genus:Blautia  
TACGTAGGGGGCAAGCGTTATCCGGATTTACTGGGTGTAAGGGAGCGTAGACGGTGTGGCAAGTCTGGTGTGAAAGGCA  
TGGGCTCAACCTGTGGACTGCATTGAAACTGTCATACTTGAAGTGCAGGAGGGGTAAGCGGAATTCCTAGTGTAGCGGTG  
AAATGCGTAGATATTAGGAGGAACACCACTGGCGAAGGCGGCTTACTGGACGGTAAGTACGCTGAGGCTCGAAAGCGTG  
GGGAG

>ASV:636:Genus:Ruminiclostridium\_9  
TACGTAGGTGGCAAGCGTTGTCCGGAATTTACTGGGTGTAAGGGCGTGTAGGCGGGATTGCAAGTCAAGGCGTAAAACCA  
GGGGCTCAACCTCTGGCCTGCTTTGAAACTGTAGTCTTGAAGTGCAGGAGGTTGACGGAATTCCTAGTGTAGCGGTG  
AAATGCGTAGATATTAGGAGGAACACCACTGGCGAAGGCGGCTCAACTGGACGACAAGTACGCTGAGGCGCAAAGCGTG  
GGGAG

>ASV:637:Genus:Agathobacter  
TACGTATGGTCAAGCGTTATCCGGATTTACTGGGTGTAAGGGGGCGAGGCGGTGCGGCAAGTCTGATGTGAAAGCC  
GGGGCTCAACCCGGTACTGCATTGAAACTGTCGTAAGTGCAGGAGGGTAAGCGGAATTCCTAGTGTAGCGGTG

AAATGCGTAGATATTAGGAGGAACACCAGTGGCGAAGGCGGCTTACTGGACGATAACTGACGCTGAGGCTCGAAAGCGTG  
GGGAG  
>ASV:638:Genus:Oscillospira  
TACGTAGGTGGCAAGCGTTGTCCGGATTACTGGGTGTAAAGGGCGTGTAGCCGGGAGACAAGTCAGATGTGAAATCTG  
GAGGCTCAACCTCCAACTGCATTTGAACTGTTTCTCTTGTAGTATCGGAGAGGTAATCGGAATTCCTAGTGTAGCGGTG  
AAATGCGTAGATATTAGGAAGAACACCAGTGGCGAAGGCGGATTACTGGACGACAACGACGCTGAGGCGCGAAAGCGTG  
GGGAG  
>ASV:639:Species:succinatiphilus  
TACGTAGGTGGCAAGCGTTGTCCGGATTACTGGGCGTAAAGCGCGCGCAGGCGGCTTCTAAGTCCATCTTAAAAGTGC  
GGGGCTTAACCCCGTGTAGGGATGGAACTGGAAAGCTGGAGTATCGGAGAGGAAAGTGGAAATTCCTAGTGTAGCGGTGA  
AATGCGTAGAGATTAGGAAGAACACCAGTGGCGAAGGCGACTTCTGTGACGACAACGACGCTGAGGCGCGAAAGCGTG  
GGAGC  
>ASV:640:Genus:Domibacillus  
TACGTAGGTGGCAAGCGTTGTCCGGATTACTGGGCGTAAAGCGCGCGCAGGCGGTTTCTAAGTCTGATGTGAAAGCCC  
ACGGCTCAACCGTGGAAAGTCAATGGAACTGGGAGACTTGTAGTGCAGAAGAGAAGAGCGGAATTCACGTGTAGCGGTG  
AAATGCGTAGAGATTGGAGGAACACCAGTGGCGAAGGCGGCTCTTTGGTCTGTAACGACGCTGAGGCGCGAAAGCGTG  
GGGAG  
>ASV:641:Family:Coriobacteriales\_Incertae\_Sedis  
TACGTATGGTCAAGCGTTATCCGGAACTTACTGGGCGTAAAGCGCGCTAGGCGGCTTGTAAAGCAGGAATTTAAATCTT  
AGGGCTCAACCTTAAGTCGGTTCCTGAACTGGCAGGCTCGAGTGCAGAGAGGAAAGTGGAAATTCACGTGTAGCGGTGA  
AATGCGCAGATATTGGGAAGAACACCAGTGGCGAAGGCGACTTCTGGGCCGCCACTGACGCTGAGGCGCGAAAGCTAGG  
GGAGC  
>ASV:642:Species:deceptionensis/endophytica/fluorescens/fragi/helleri/lundensis/psychrophila/  
putida/syringae/taiwanensis/weihenstephanensis  
TACAGAGGGTGGCAAGCGTTAATCCGGAACTTACTGGGCGTAAAGCGCGCTAGGTTGGTTTGTAAAGTTGAATGTGAAATCCC  
CGGGCTCAACCTGGGAACTGCATCCAAACTGGCAAGCTAGAGTATGGTAGAGGGTAGTGGAAATTCCTGTGTAGCGGTG  
AAATGCGTAGATATTAGGAAGAACACCAGTGGCGAAGGCGACTACCTGGACTGATACTGACACTGAGGTGCGAAAGCGTG  
GGGAG  
>ASV:643:Species:natatoria/ursincola  
TACGGAGGGAGCTAGCGTTGTCCGGAACTTACTGGGCGTAAAGCGCACGTAGGCGGCCATTCAAGTCAGAGGTGAAAGCCC  
GGGGCTCAACCCGGAAGTGCCTTTGAACTAGATGGCTTGAATCTTGGAGAGGCGAGTGGAAATTCAGAGTGTAGAGGTG  
AAATTCGTAGATATTGGGAAGAACACCAGTGGCGAAGGCGACTCGCTGGACAAGTATTGACGCTGAGGTGCGAAAGCGTG  
GGGAG  
>ASV:644:Order:Clostridiales  
TACGTAGGGAGCGAGCGTTGTCCGGAACTTACTGGGCGTAAAGGGCGCGTAGGCGGTAGATCAAGTCGCATGTGAAATACC  
CGGGCTCAACCTGGGGGTGCATGCGAAACTGGAATACTTGTAGTGCAGGAGAGGAAAGTGGAAATTCCTAGTGTAGCGGTG  
AAATGCGTAGATATTAGGAGGAACACCAGTGGCGAAGGCGACTTCTGGGCCGTAACGACGCTGAGGCGCGAAAGCGTG  
GGGAG  
>ASV:645:Species:curvatus/graminis/sakei  
TACGTAGGTGGCAAGCGTTGTCCGGATTTACTGGGCGTAAAGCGAGCGCAGGCGGTTTCTAAGTCTGATGTGAAAGCCT  
TCGGCTCAACCGAAGAAGTGCATCGGAACTGGGAACTTGTAGTGCAGAAGAGGACAGTGGAACTCCATGTGTAGCGGTG  
AAATGCGTAGATATTAGGAAGAACACCAGTGGCGAAGGCGGCTGTCTGGTCTGTAACGACGCTGAGGCTCGAAAGCATG  
GGTAG  
>ASV:646:Genus:Bacteroides  
TACGGAGGATCCGAGCGTTATCCGGATTTACTGGGTTAAAGGGAGCGTAGGTGGATTGTTAAGTCAGTTGTGAAAGTTT  
GCGGCTCAACCGTAAATTCAGTGTGAACTGGCAGTCTTGTAGTACAGTAGAGGTGGGCGGAATTCGTGGTGTAGCGGTG  
AAATGCTTAGATATCACGAAGAACCTCGATTGCGAAGGCGACTCACTGGACTGCTAACTGACACTGAGGCTCGAAAGTGT  
GGTA  
>ASV:647:Genus:Lachnospiraceae\_NK4A136\_group  
TACGTAGGGGGCAAGCGTTATCCGGATTTACTGGGTGTAAAGGGAGTGTAGACGGTTTTGCAAGTCTGAAGTAAAGCCC  
GGGGCTTAACCCGGGACTGCTTTGAACTGTAGGACTAGAGTGCAGGAGAGGTAAGTGGAAATTCCTAGTGTAGCGGTG  
AAATGCGTAGATATTAGGAGGAACACCAGTGGCGAAGGCGGCTTACTGGACTGTAACGACGTTGAGGCTCGAAAGCGTG  
GGGAG  
>ASV:648:Family:Christensenellaceae  
TACGTAGGGAGCGAGCGTTGTCCGGAACTTACTGGGCGTAAAGGGTGCCTAGGCGGTTTGGTAAGTCAGATGTGAAATACC  
CGGGCTTAACCCGGGGCTGCATCTGATACTGCAGACTTGTAGTGCAGGAGAGGAAAGCGGAATTCCTAGTGTAGCGGTG  
AAATGCGTAGATATTAGGAGGAACACCAGTGGCGAAGGCGGCTTCTGGACTGTAACGACGCTGAGGCGCGAAAGCGTG  
GGGAG  
>ASV:649:Genus:Lachnospiraceae\_NK4B4\_group  
TACGTAGGGGGCAAGCGTTATCCGGATTTACTGGGTGTAAAGGGAGCGCAGGCGGCGAGGCAAGTCAAGTGTGAAATACC  
GGGGCTCAACCCGGGACTGCATTTGAACTGTCCGGCTAGAGTGCAGGAGAGGCGAGGCGGAATTCCTAGTGTAGCGGTG  
AAATGCGTAGATATTAGGAGGAACACCAGTGGCGAAGGCGGCTGCTGGACTGTAACGACGCTGAGGCTCGAAAGCGTG  
GGGAG  
>ASV:650:Genus:Lachnoclostridium  
TACGTAGGGGGCAAGCGTTATCCGGATTTACTGGGTGTAAAGGGAGCGCAGACGGCACTGCAAGTCTGAAGTAAAGCCC  
GGGGCTCAACCCGGGACTGCTTTGAACTGTAGGGCTAGAGTGTCTGGAGAGGCAAGCGGAATTCCTAGTGTAGCGGTG  
AAATGCGTAGATATTAGGAAGAACACCAGTGGCGAAGGCGGCTGCTGGACTGTAACGACGCTGAGGCTCGAAAGCGTG  
GGGAG



>ASV:651:Family:Lachnospiraceae  
TACGTATGGAGCAAGCGTTATCCGGATTTACTGGGTGTAAAGGGTGCCTAGGTGGCAGTGCAAGTCAGATGTGAAAGGCC  
GGGGCTCAACCCCGAGCTGCATTTGAAACTGCGCGCTAGAGTACAGGAGAGGCAGGCGGAATTCCTAGTGTAGCGGTG  
AAATGCGTAGATATTAGGAGGAACACCAGTGGCGAAGGCGGCTGCTGGACTGTTACTGACACTGAGGCACGAAAGCGTG  
GGAG

>ASV:652:Family:Erysipelotrichaceae  
TACGTAGGTGGCGAGCGTTATCCGGAATCATTGGGCGTAAAGGGTGCCTAGGCGGCGAGTTAAGTCTGAGGTTAAAGGTT  
GCAGCTCAACTGTAACAAGCCTTGGAACTGACTGGCTAGAGTGCAGGAGAGGCGAGTGGAAATCCATGTGTAGCGGTAA  
AATGCGTAGATATATGAGGAACACCAGTGGCGAAGGCGGCTGCTGGCCTGTAAGTACGCTGAGGCACGAAAGCGTG  
GGAG

>ASV:653:Genus:Bacteroides  
TACGGAGGATGCGAGCGTTATCCGGATTTATTGGGTTTAAAGGGAGCGCAGACGGGATGTTAAGTCACTGTGAAAGTTT  
GCGGCTCAACCGTAAATTTGACTGACTGGCTTCTTGGTGCAGTTGAGGTGTGCGGAATTCGTGGTGTAGCGGTG  
AAATGCTTAGATATCAGGAAGAACTCCGATTGCGAAGGCAGCTCACTAACTGTAAGTACGCTTCTGCTGAAAGTGTG  
GGTAT

>ASV:654:Species:vaginalis  
TACGTAGGTGGCAAGCGTTATCCGGATTTATTGGGCGTAAAGCGAGCGCAGGCGGTTGCTTAGGTCTGATGTGAAAGCCT  
TCGGCTTAACCGAAGAAGGGCATCGAAACCGGCGACTTGAAGTGCAGAAAGAGGACAGTGGAACTCCATGTGTAGCGGTG  
GAATGCGTAGATATATGGAAGAACACCAGTGGCGAAGGCGGCTGCTGGTCTGCAACTGACGCTGAGGCTCGAAAGCATG  
GGTAG

>ASV:655:Genus:Prevotella\_9  
TACGGAAGGTCCGGCGTTATCCGGATTTATTGGGTTTAAAGGGAGCGTAGGCCGAGATTAAGCGTGTGTGAAATGTA  
GGTCTCAACATCTGCAGCTGCAGCGCAACTGGTTTCTTGGTACGACAAAGTGGCGGAATTCGTGGTGTAGCGGTG  
AAATGCTTAGATATCAGGAAGAACTCCGATTGCGAAGGCAGCTCACTGGAGCGCAACTGACGCTGAAGCTCGAAAGTGC  
GGTAT

>ASV:656:Order:Gastranaerophilales  
TACGGAGGTCAGCGTTGTCGGGAATCATTGGGCGTAAAGAGTTCGTAGGCGCATGTAAGTCAAGTGTGTTAAAGGCT  
GAGGCTCAACCTCAGTATGGCACTTGAATCTGCAAGCTAGAGTGCAGGAGAGGTAAGTGGAAATTCCTGGTGTAGCGGTG  
AAATGCTTAGATATCAGGAGGAACATCGTGGCGTAAGCGCTTACTGGCCGTAATTGACGCTGAGGAACGAAAGCCAG  
GGTAG

>ASV:657:Genus:Christensenellaceae\_R-7\_group  
TACGTAGGGGCAAGCGTTGTCGGGAATGATTGGGCGTAAAGGGCGTGTAGGCCGCTAAGTAACTGAGTGTGAAAGTCC  
TGCTTTAAGGTGGGAATTGCTTTGGATACTGCATAGCTAGAGTGCAGGAGAGGTAAGTGGAAATTCCTAGTGTAGCGGTG  
AAATGCGTAGAGATTGGGAGGAACACCAGTGGCGAAGGCGACTTACTGGACTGTAAGTACGCTGAGGCGGAAAGTGTG  
GGAG

>ASV:658:Genus:Prevotella\_2  
TACGGAAGGTCCAGGCGTTATCCGGATTTATTGGGTTTAAAGGGAGCGTAGGCCGTTTGGTAAGCGTGTGTGAAATGTC  
GGGGCTCAACCTGGGCATTGCAGCGCAACTGTCAGACTTGAAGTGCAGGAGGTAAGTGGAAATTCCTGCTGTAGCGGTG  
AAATGCTTAGATATGACGAAGAACTCCGATTGCGAAGGCAGCTGCTGTAGCGCAACTGACGCTGAAGCTCGAAAGCGTG  
GGTAT

>ASV:659:Genus:Erysipelatoclostridium  
TACGTAGGTGGCGAGCGTTATCCGGAATTTATTGGGCGTAAAGAGGGAGCAGGCGGCAGCAAGGGTCTGTGGTAAAGGCT  
GAAGCTTAACCTCAGTGTGCCAGAGAAACCGGCGAGCTAGAGTGCAGGAGAGGATCGTGGAAATTCATGTGTAGCGGTGA  
AATGCGTAGATATATGAGGAACACCAGTGGCGAAGGCGACGATCTGGACTGCAACTGACGCTCAGTCCGAAAGCGTG  
GGAG

>ASV:660:Genus:Bacteroides  
TACGGAGGATCCGAGCGTTATCCGGATTTATTGGGTTTAAAGGGAGCGTAGGTGGATTGTTAAGTCACTGTGAAAGTTT  
GCGGCTCAACCGTAAATTTGCACTTGAAGTGGCAGTCTTGGTACAGTACAGGAGGTTGGCGGAATTCGTGGTGTAGCGGTG  
AAATGCTTAGATATCAGGAAGAACTCCGATTGCGAAGGCAGCTCACTAGACTGCAACTGACACTGAGGCTCGAAAGTGTG  
GGTAT

>ASV:661:Genus:Parabacteroides  
TACGGAGGATCCGAGCGTTATCCGGATTTATTGGGTTTAAAGGGTGCCTAGGCGGCTTTTAAAGTCAAGCGGTGAAAGTCT  
GTGGCTCAACCATAGAATTGCCGTTGAAACTGGGAGGCTTGAAGTATGTTTGAAGGAGGCGGAATGCGTGGTGTAGCGGTG  
AAATGCTTAGATATCAGGAAGAACTCCGATTGCGAAGGCAGCTGCTAAGTGCAGTACACTGACGCTGAGGCTCGAAAGTGTG  
GGTAT

>ASV:662:Genus:GCA-900066225  
TACGTAGGTGGCAAGCGTTGTCGGGAATTTACTGGGTGTAAAGGGAGCGTAGGCGGGAAGGCAAGTTGGACGTTTAACTA  
TCGGCTCAACCGATAGTCGCTTCAAAGTGTCTTGGTGAAGTGAAGTGAAGGTAAGCGGAATTCCTAGTGTAGCGGTGA  
AATGCGTAAATATTAGGAGGAACACCAGTGGCGAAGGCGGCTTACTGGGCTTTAACTGACGCTGAGGCTCGAAAGCGTG  
GTAGC

>ASV:663:Species:massiliensis  
TACGTAGGGAGCGAGCGTTGTCGGGAATTTACTGGGTGTAAAGGGAGCGTAGGCGGGTCTCAAGTCAATGTTAAATCTA  
CCGGCTCAACTGGTAGCTGCGTTGAAACTGGGCTCTTGGTGAAGTGAAGTGAAGGAGGCGGGAATTCCTAGTGTAGCGGTGA  
AATGCGTAGATATTAGGAGGAACACCAGTGGCGAAGGCGGCTGCTGGGCTTTACTGACGCTGAGGCTCGAAAGCGTG  
GGAG

>ASV:664:Family:Erysipelotrichaceae  
TACGTAGGTGGCGAGCGTTATCCGGAATCATTGGGCGTAAAGGGTGCCTAGGTGGCAGGATAAGTCTGTAGTAAAGGCA  
GCGGCTCAACCGCTGTTGGCTATGAAACTGTGAGCTGGAGTGCAGAAAGGGCGATGGAATTCATGTGTAGCGGTAA

AATGCGTAGATATATGGAGGAACACCAGTGGCGAAGGCGGCCCTGGTCTGCAACTGACACTGAAGCACGAAAGCGTGG  
GGAGC  
>ASV:665:Genus:Butyricicoccus  
TACGTAGGGAGCAAGCGTTATCCGGATTTACTGGGTGTAAGGGGCGCGCAGGCGGGCCGCAAGTTGGAAGTAAAATCTA  
TGGGCTTAACCCATAAACTGCTTTCAAACCTGTTGGTCTTGAGTGATGGAGAGGCGAGCGGAATTCGCTGTGTAGCGGTG  
AAATGCGTAGATATACGGAGGAACACCAGTGGCGAAGGCGGCCCTGCTGGACATTAACCTGACGCTGAGGCGCGAAAGCGTG  
GGGAG  
>ASV:666:Family:Ruminococcaceae  
TACGTAGGTGGCAAGCGTTATCCGGAACTTACTGGGTGTAAGGGGAGCGCAGGCGGGATAGCAAGTCAGTTGTGAAAACCTA  
TGGGCTCAACCCATAGATTGCAGTTGAACTGTTATTTCTTGAGTGGAGTAGAGGCAAGCGGAATTCGAGTGTAGCGGTG  
AAATGCGTAGATATTCGGAGGAACACCAGTGGCGAAGGCGGCCCTGCTGGGCTCTAACTGACGCTGAGGCTCGAAAGTGTG  
GGGAG  
>ASV:667:Genus:Prevotella\_2  
TACGGAAGGTCCGGGCTTATCCGGATTTATTGGGTTTAAAGGGAGCGTAGGCGCTTATAAGCGTGTGTGAAATGTG  
GGGGCTCAACCTGGGCATTGCAGCGCAACTGTGAGACTTGAGTGCAGGAAAGTAGGCGGAATTCGCTGTGTAGCGGTG  
AAATGCTTAGATATGACGAAGAACTCCGATTGCGAAGGCGAGCCTGCTGTAGCGCAACTGACGCTGAAGCTCGAAAGCGTG  
GGTAT  
>ASV:668:Genus:Roseburia  
TACGTATGGTCAAGCGTTATCCGGATTTACTGGGTGTAAGGGGAGCGCAGGCGGTGCGGCAAGTCTGATGTGAAAGCCC  
GGGGCTCAACCGCGGACTGCATTGAAACTGTCGACTAGAGTGTGCGAGAGGTAAGTGAATTCCTAGTGTAGCGGTG  
AAATGCGTAGATATTAGGAGGAACACCAGTGGCGAAGGCGGCCCTACTGGACGATAACTGACGCTGAGGCTCGAAAGCGTG  
GGGAG  
>ASV:669:Genus:Sutterella  
TACGTAGGGTCAAGCGTTAATCGGAATTACTGGGCGTAAAGCGTGCAGGCGGTTTTGTAAGATAGATGTGAAATCCC  
CGGGCTCAACCTGGGAATTGCATATATGACTGCAAGACTTGAGTTTGTGAGAGGAGGTGGAATTCCTAGTGTAGCGGTG  
AAATGCGTAGATATTTGGAAGAACACCAGTGGCGAAGGCGAGCCTCTGGGACATGACTGACGCTCATGCACGAAAGCGTG  
GGGAG  
>ASV:670:Genus:Parabacteroides  
TACGGAGGATCCGAGCGTTATCCGGATTTATTGGGTTTAAAGGGTGCCTAGGCGGCCTTTTAAGTCAGCGGTGAAAGTCT  
GTGGCTCAACCATAGAAATTGCCTGTTGAAACTGGGGGCTTGAGTATGTTTGAGGCGAGCGGAATGCGTGGTGTAGCGGTG  
AAATGCTTAGATATCACGAAGAATCCGATTGCGAAGGCGAGCCTGCTGGACTGTAACCTGACGCTGATGCTCGAAAGTGTG  
GGTAT  
>ASV:671:Species:callanderi/limosum  
TACGTAGGGGACAAGCGTTGTCCGGAATGACTGGGCGTAAAGGGGCGCTAGGCGGTCTATTAAGTCTGATGTGAAAGGTA  
CCGGCTCAACCGGTGAAGTGCATTGAAACTGGTAGACTTGAGTATTGGAGAGGCAAGTGAATTCCTAGTGTAGCGGTG  
AAATGCGTAGATATTAGGAGGAACACCAGTGGCGAAGGCGGCCCTGCTGGACAATACTGACGCTGAGGTGCGAAAGCGTG  
GGGAG  
>ASV:672:Genus:Ruminococcaceae\_UCG-014  
TACGTAGGGAGCAAGCGTTATCCGGATTTATTGGGTGTAAGGGTGCCTAGACGGGAAATTAAGTTAGTTGTGAAAGCCC  
TCGGCTTAACCTGAGGAATTGCAACTAAAACCTGTTTTCTTGAGTGCAGGAGAGGTAAGTGAATTCCTAGTGTAGCGGTG  
AAATGCGTAGATATTAGGAGGAACACCAGTGGCGAAGGCGACTTACTGGACTGTAACCTGACGCTGAGGCACGAAAGTGTG  
GGGAG  
>ASV:673:Genus:Faecalibacterium  
AACGTAGGTCACAAGCGTTGTCCGGAATTACTGGGTGTAAGGGGAGCGCAGGCGGGAGAACAAGTTGGAAGTAAAATCCA  
TGGGCTCAACCCATGAACTGCTTTCAAACCTGTTTTCTTGAGTAGTGCAGAGGTAGGTGGAATTCCTGGTGTAGCGGTG  
GAATGCGTAGATATCGGAGGAACACCAGTGGCGAAGGCGGCCCTACTGGCACCAACTGACGCTGAGGCTCGAAAGTGTG  
GGTAG  
>ASV:674:Genus:Lachnospiraceae\_NC2004\_group  
TACGTATGGAGCAAGCGTTATCCGGATTTACTGGGTGTAAGGGTGCCTAGGCGGCAAGGCAAGTCAGATGTGAAAGACC  
GGGGCTCAACCTCCGGGCTGCATTTGAAACTGTTTTGCTGGAGTCCAGGAGAGGCGAGGCGGAATTCCTAGTGTAGCGGTG  
AAATGCGTAGATATTAGGAGGAACACCAGTGGCGAAGGCGGCCCTGCTGGACTGGTACTGACGCTGAGGCACGAAAGCGTG  
GGGAG  
>ASV:675:Species:anginosus/constellatus/intermedius/milleri/mitis/sanguinis/suis  
TACGTAGGTCCGAGCGTTGTCCGGATTTATTGGGCGTAAAGCGAGCGCAGGCGGTTAGAAAAGTCTGAAGTGAAGGCA  
GTGGCTCAACCATTTGAGGCTTTGAAACTGTTAACTTGAGTGCAGAAGGGGAGAGTGAATTCATGTGTAGCGGTGA  
AATGCGTAGATATATGGAGGAACACCAGTGGCGAAAGCGGCCCTCTGGTCTGTAACCTGACGCTGAGGCTCGAAAGCGTGG  
GGAGC  
>ASV:676:Order:Rhodospirillales  
TACGAAGGGGGCGAGCGTTGTTCCGGAATTACTGGGCGTAAAGGGTGTGTAGGCGGTTAAGTAAGATAGTGGTAAAATGCC  
GGGGCTCAACCTCGGAATTGCCATTATGACTATTTAGCTAGAATGATGCAGAGGATAGCGGAATACCCAGTGTAGAGGTG  
AAATTCGTAGATATTGGGTAGAACACCAGAGGCGAAGGCGGCTATCTGGCATTGATTGACGCTGAGGCACGAAAGCATG  
GGGAT  
>ASV:677:Genus:Intestinimonas  
TACGTAGGTGGCAAGCGTTATCCGGATTTACTGGGTGTAAGGGGCGTGTAGGCGGACTGCAAGTCAGATGTGAAAACCTA  
TGAGCTCAACTCATAGCCTGCATTTGAAACTGTAGTTCTTGAGTGTGAGAGGCAATCGGAATTCGCTGTGTAGCGGTG  
AAATGCGTAGATATACGGAGGAACACCAGTGGCGAAGGCGGATTGCTGGACAGTAACCTGACGCTGAGGCGCGAAAGCGTG  
GGGAG  
>ASV:678:Genus:Intestinimonas

TACGTAGGTGGCAAGCGTTATCCGGATTTACTGGGTGTAAAGGGCGTGTAGGCGGGAAAGCAAGTCAGGCGTGAAAACCTA  
TGGGCTCAACCCATAGCCTGCGTTTAAACTGTTTTCTTGAGTGTGCGAGAGGCAATCGGAATTCCTGTGTAGCGGTG  
AAATGCGTAGATATACGGAGGAACACCAGTGGCGAAGGCGGATTGCTGGACGATAACTGACGCTGAGGCGCGAAAGCGTG  
GGGAG

>ASV:679:Genus:Bacteroides

TACGGAGGATCCGAGCGTTATCCGGATTTATTGGGTTAAAGGGAGCGTAGATGGATGTTTAAAGTCAGTTGTGAAAATTT  
GCGGCTCAACCGTAAAATTGCAAGTTGATACTGGCTGTCTTGAGTACAGTAGAGGTGGGCGGAATTCGTGGTGTAGCGGTG  
AAATGCTTAGATATCACGAAGAAGTCCGATTGCGAAGGCAGCCTGCTAAGCTGCAACTGACATTGAGGCTCGAAAAGTGTG  
GGTAT

>ASV:680:Genus:Ruminiclostridium\_9

TACGTAGGTGGCAAGCGTTATCCGGATTTACTGGGTGTAAAGGGCGTGTAGGCGGGAAAGCAAGTCAGATGTGAAAACCTG  
TGGGCTCAACCCACAGCCTGCATTTGAAACTGTTTTCTTGAGTACTGGAGAGGCAGATGGAATTCCTAGTGTAGCGGTG  
AAATGCGTAGATATTAGGAGGAACACCAGTGGCGAAGGCGATCTGCTGGACAGCAACTGACGCTGAGGCGCGAAAGCGTG  
GGGAG

>ASV:681:Genus:Sutterella

TACGTAGGGTGGCAAGCGTTAATCGGAATTACTGGGCGTAAAGGGTGGCAGGCGGCTATGCAAGACAGATGTGAAATCCC  
CGGGCTTAACCTGGGAAGTGCATTTGTGACTGCATGGCTAGAGTTTGTGAGAGGAGGTGGAATTCGCGTGTAGCAGTG  
AAATGCGTAGATATCGGAAGAACACCAATGGCGAAGGCAGCCTCTGGGACATGACTGACGCTCATGCACGAAAGCGTG  
GGGAG

>ASV:682:Genus:Ruminiclostridium\_9

TACGTAGGGAGCAAGCGTTATCCGGATTTACTGGGTGTAAAGGGCGTGTAGGCGGGACAGCAAGTCAGATGTGAAAACCTA  
TGGGCTCAACCCATAGCCTGCATTTGAAACTGTTTCTTGAGTGTGCGAGAGGCAATGGAAGTCCCTAGTGTAGCGGTG  
AAATGCGTAGATATTAGGAAGAACACCAGTGGCGAAGGCGGCTTCTGCTGGACAGTAAGTACGCTGATGCGCGAAAGTGTG  
GGGAG

>ASV:683:Genus:Faecalibacterium

AACGTAGGTCACAAGCGTTGTCCGGAATTACTGGGTGTAAAGGGAGCGCAGGCGGGAAGACAAGTTGGAAGTAAATCTA  
TGGGCTCAACCCATAAACTGCTTTCAAAGTGTCTTCTTGAGTAGTGCAGAGGTAGGCGGAATTCGCGTGTAGCGGTG  
GAATGCGTAGATATCGGGAGGAACACCAGTGGCGAAGGCGGCTGCTGGGCACCAACTGACGCTGAGGCTCGAAAAGTGTG  
GGTAG

>ASV:684:Genus:Parabacteroides

TACGGAGGATCCGAGCGTTATCCGGATTTATTGGGTTAAAGGGTGCAGTGGCTTTTAAAGTCAGCGGTGAAAATTT  
GTGGCTCAACCCATAAAATTGCCGTTGAAACTGGAGGGCTTGAGTATATTTGAGTAGGCGGAATGCGTGGTGTAGCGGTG  
AAATGCTAGATATACGCGAGAAGTCCAAATGCGAAGGCAGCTTACTAAACTATAACTGACACTGAAGCACGAAAGCGTG  
GGGAT

>ASV:685:Genus:Faecalibacterium

AACGTAGGTCACAAGCGTTGTCCGGAATTACTGGGTGTAAAGGGAGCGCAGGCGGGAAGACAAGTTGGAAGTAAATCCA  
TGGGCTCAACCCATGAAGTGCATTTCAAAGTGTCTTCTTGAGTAGTGCAGAGGTAGGCGGAATTCGCGTGTAGCGGTG  
GAATGCGTAGATATCGGGGGAACACCAGTGGCGAAGGCGGCTTACTGGGCACCAACTGACGCTGAGGCTCGAAAAGTGTG  
GGTAG

>ASV:686:Family:Lachnospiraceae

TACGTAGGGGGCAAGCGTTATCCGGATTTACTGGGTGTAAAGGGTGCAGTGGCAAGGCAAGTCAGATGTGAAAAGCCC  
GGGGCTCAACCCCGGTATGCGAATTTGAAACTGTCTGGCTAGAGTGCAGGAGAGGTAAGCGGAATTCCTAGTGTAGCGGTG  
AAATGCGTAGATATTAGGAGGAACACCAGTGGCGAAGGCGGCTTACTGGACTGTAAGTACACTGAGGACGAAAGCGTG  
GGGAG

>ASV:687:Genus:Dialister

TACGTAGGTGGCAAGCGTTGTCCGGAATTATTGGGCGTAAAGCGCGCAGGCGGCTTCCCAAGTCCCTCTTAAAAGTGC  
GGGGCTTAACCCCGGTATGCGAATTTGAAACTGGGAAGCTGGAGTATCGGAGAGGAAAGTGAATTCCTAGTGTAGCGGTG  
AATGCGTAGAGATTAGGAAGAACACCAGTGGCGAAGGCGACTTCTGGACGAAAAGTACGCTGGGGCGCGAAAGCGTGG  
GGAGC

>ASV:688:Genus:Prevotella\_9

TACGGAAGGTCCGGCGTTATCCGGATTTATTGGGTTAAAGGGAGCGTAGGCTGGAGATTAAGCGTGTGTGAAAATGTA  
GTGGCTCAACCTCTGCACTGCAGCGGAAGTGGTCTTCTTGAGTACGCACAACGTTGGCGGAATTCGTGGTGTAGCGGTG  
AAATGCTTAGATATCACGAAGAAGTCCGATTGCGAAGGCAGCTCACGGGAGCGCAACTGACGCTGAAGCTCGAAAAGTGC  
GGTAT

>ASV:689:Genus:Lachnospiraceae\_UCG-010

TACGTAGGGGGCAAGCGTTATCCGGAATTACTGGGTGTAAAGGGTGTAGGCGGCATGACAAGTAAGATGTGAAAAGCCC  
GTGGCTTAACCCACGGGATTGCAATTTAAACTGTTGAGCTAGAGTACAGGAGAGGAAAGCGGAATTCCTAGTGTAGCGGTG  
AAATGCGTAGATATTGGGAAGAACACCAGTGGCGAAGGCGGCTTCTGGACTGAAAAGTACGCTGAGGACGAAAGCGTG  
GGGAG

>ASV:690:Genus:Lachnospiraceae\_UCG-010

TACGTAGGGGGCAAGCGTTATCCGGAATTACTGGGTGTAAAGGGAGCGTAGGCGGCATGGTAAGTAAGATGTGAAAAGCCC  
GAGGCTTAACCTCGAGGATTGCATTTAAACTATCAAGCTAGAGTACAGGAGAGGAAAGCGGAATTCCTAGTGTAGCGGT  
GAAATGCGTAGATATTAGGAAGAACACCAGTGGCGAAGGCGGCTTCTGGACTGAAAAGTACGCTGAGGCTCGAAAAGCGT  
GGGGA

>ASV:691:Genus:Prevotella\_9

TACGGAAGGTCCGGCGTTATCCGGATTTATTGGGTTAAAGGGAGCGTAGGCGGAGATTAAGCGTGTGTGAAAATGTA  
GTGGCTCAACCTCTGCACTGCAGCGGAAGTGGTCTTCTTGAGTACGCACAACGTTGGCGGAATTCGTGGTGTAGCGGTG  
AAATGCTTAGATATCACGAAGAAGTCCGATTGCGAAGGCAGCTCACGGGAGCGCAACTGACGCTGAAGCTCGAAAAGTGC

GGTAT

>ASV:692:Genus:Afipia

TACGAAGGGGGCTAGCGTTGCTCGGAATCACTGGGCGTAAAGGGTGCCTAGGCGGGTCTTTAAGTCAGGGGTGAAATCCT  
GGAGCTCAACCTCAGAACTGCCTTTGATACTGAGGATCTTGTAGTCCGGAAGAGGTGAGTGGAAGTCCGAGTGTAGAGGTG  
AAATTCGTAGATATTCGCAAGAACCACAGTGGCGAAGGCGGCTACTGGTCCGGTACTGACGCTGAGGCACGAAAGCGTG  
GGGAG

>ASV:693:Genus:Subdoligranulum

AACGTAGGGTGCACAGCGTTGTCCGGAATTAAGGGTGTAAAGGGAGCGCAGGCGGATCGGCAAGTTGGAAGTAAAACTA  
TGGGCTCAACCCATAAATTGCTTTCAAAGTCTGGCCTTGTAGTGTGAGAGGTAGGTGGAATTCGCGGTGTAGCGGTG  
GAATGCGTAGATATCGGAGGAACACCAGTGGCGAAGGCGACTACTGGGCACCAACTGACGCTGAGGCTCGAAAGCATG  
GGTAG

>ASV:694:Genus:Roseburia

TACGTAGGGGGCAAGCGTTATCCGGATTTACTGGGTGTAAAGGGAGCGCAGGCGGTGCGGCAAGTCTGATGTGTAAGCC  
GGGGCTCAACCCCGGACTGCATTGAAACTGTCGTAAGTGTAGTATCGGAGAGGTAAAGTGAATTCCTAGTGTAGCGGTG  
AAATGCGTAGATATTAGGAGGAACACCAGTGGCGAAGGCGGCTTACTGGACGATAACTGACGCTGAGGCTCGAAAGCGTG  
GGGAG

>ASV:695:Family:Ruminococcaceae

TACGTAGGTGGCAAGCGTTGTCCGGAATTAAGGGTGTAAAGGGAGCGTAGGCGGGAAGCAAGTCAAGTGTGAAATCCA  
CAGGCTTAACCTGTGGCGTGCATTTGAAACTGTTTTCTTGTAGTGAAGTAGAGGCAGGCGGAATTCGAGTGTAGCGGTG  
AAATGCGTAGATATTCGAGGAACACCAGTGGCGAAGGCGGCTTACTGGACGATAACTGACGCTGAGGCTCGAAAGCATG  
GGTAG

>ASV:696:Genus:Blautia

TACGTAGGGGGCAAGCGTTATCCGGATTTACTGGGTGTAAAGGGAGCGTAGACGGAGCAGCAAGTCTGATGTGAAAGGCG  
GGGGCTCAACCCCTGGACTGCATTGAAACTGTTGATCTTGTAGTACCGGAGAGGTAAGCGGAATTCCTAGTGTAGCGGTG  
AAATGCGTAGATATTAGGAGGAACACCAGTGGCGAAGGCGGCTTACTGGACGTAAGTACGCTTGTAGGCTCGAAAGCGTG  
GGGAG

>ASV:697:Family:Ruminococcaceae

TACGTAGGGAGCGAGCGTTGTCCGGAATTAAGGGTGTAAAGGGAGCGTAGGCGGGACAGCAAGTTGAATGTGAAATCTA  
TGGGCTCAACCCATAAAGTGCCTTCAAAGTGTGTTCTTGTAGTGAAGTAGAGGTAGGCGGAATTCCTAGTGTAGCGGTG  
AAATGCGTAGATATTAGGAGGAACACCAGTGGCGAAGGCGGCTTACTGGGCTTTAAGTACGCTGAGGCTCGAAAGCGTG  
GGTAG

>ASV:698:Genus:Clostridium\_sensu\_stricto\_1

TACGTAGGTGGCAAGCGTTGTCCGGATTTACTGGGCGTAAAGGGAGCGTAGGCGGATTTTAAAGTGGGATGTGAAATACC  
CGGGCTCAACCTGGGTGCTGCATTCAAACTGGAAGTCTAGAGTACAGGAGGGGAAAGCGGAATTCCTAGTGTAGCGGTG  
AAATGCGTAGAGATTAGGAAGAACCACAGTGGCGAAGGCGGCTTCTGGACTGTAAGTACGCTGAGGCTCGAAAGCGTG  
GGGAG

>ASV:699:Species:hydrogenotrophica

TACGTAAAGGGGGCAAGCGTTATCCGGATTTACTGGGTGTAAAGGGAGCGTAGACGGTTTGCAAGTCTGATGTGAAAGGCA  
TGGGCTCAACCTGTGGACTGCATTGAAACTGTCAGACTTGTAGTGCAGGAGAGGCAAGCGGAATTCCTAGTGTAGCGGTG  
AAATGCGTAGATATTAGGAGGAACACCAGTGGCGAAGGCGGCTTCTGGACTGTAAGTACGCTTGTAGGCTCGAAAGCGTG  
GGGAG

>ASV:700:Genus:GCA-900066755

TACGTATGGAGCAAGCGTTATCCGGATTTACTGGGTGTAAAGGGAGCGTAGGCGGTTATGCAAGTCAAGTGTGAAAGCCC  
GGGGCTTAACCCCGGACTGCATTTGAAACTGTGTAAGTGTAGTGTCCGAGAGGTAAGTGAATTCCTAGTGTAGCGGTG  
AAATGCGTAGATATTAGGAGGAACACCAGTGGCGAAGGCGGCTTACTGGACGATAACTGACGCTGAGGCTCGAAAGCGTG  
GGGAG

>ASV:701:Genus:Sutterella

TACGTAGGGTGCAGCGTTAATCGGAATTAAGGGTGTAAAGGGAGCGTAGGCGGTTGGGTAAGACAGATGTGAAATCCC  
CGGGCTTAACCTGGGAACTGCATTTGTACTGTCGACTGGAGTACGTCAGAGGGGGTGAATTCACGCTGTAGCAGTGT  
AAATGCGTAGATATGTGGAAGAACCACAGTGGCGAAGGCGGCTTACTGGACTGTAAGTACGCTGAGGCTCGAAAGCGTG  
GGGAG

>ASV:702:Genus:GCA-900066575

TACGTAGGGGGCAAGCGTTATCCGGATTTACTGGGTGTAAAGGGAGCGTAGGCGGTTGACAAGTCAAGTGAAGGCC  
GGGGCTCAACCTCGGACTGCTTTTGAAGTCCCGACTAGATTGCAGGAGAGGTAAGTGAATTCCTAGTGTAGCGGTG  
AAATGCGTAGATATTAGGAGGAACACCAGTGGCGAAGGCGGCTTACTGGACTGTAAGTACGCTGAGGCTCGAAAGCGTG  
GGGAG

>ASV:703:Genus:Christensenellaceae\_R-7\_group

TACGTAGGGGGCAAGCGTTGTCCGGAATGATTGGGCGTAAAGGGCGGCTAGGCGGCAACTAAGTCTGGAGTGAAGTCC  
TGCTTTAAGGTGGGAATTGCTTTGAAACTGGATGCTTGTAGTGCAGGAGAGGTAAGCGGAATTCGCGGTGTAGCGGTG  
AAATGCGTAGAGATCGGAGGAACACCAGTGGCGAAGGCGGCTTACTGGACTGTAAGTACGCTGAGGCGGCAAGGTGTG  
GGGAG

>ASV:704:Genus:Lachnoclostridium

TACGTAGGGGGCAAGCGTTATCCGGATTTACTGGGTGTAAAGGGAGCGTAGACGGCGATGCAAGTCTGGAGTGAAGGCC  
AGGGCTCAACCTGGGACTGCTTTGAAACTGTATGGCTAGAGTGTGGAGAGGTAAGTGAATTCCTAGTGTAGCGGTG  
AAATGCGTAGATATTAGGAGGAACACCAGTGGCGAAGGCGGCTTACTGGACGATAACTGACGCTTGTAGGCTCGAAAGCGTG  
GGGAG

>ASV:705:Family:Christensenellaceae

TACGTAGGGAGCGAGCGTTGTCCGGAATTAAGGGTGTAAAGGGTGCCTAGGCGGCTGGTAAGTCAAGTGTGAAATACC

CGTGCTCAACATGGGGGTGCATCTGATACTGTTAGCCTTGTAGTGCAGGAGAGGAAAGCGGAATTCCTAGTGTAGCGGTG  
AAATGCGTAGATATTAGGAGGAACACCAGTGGCGAAGGCGGCTTCTGGACTGTAACGACGCTGAGGCACGAAAGCGTG  
GGGAG

>ASV:706:Family:Lachnospiraceae

TACGTAGGGGGCAAGCGTTATCCGGATTTACTGGGTGTAAGGGAGCGTAGACGGAACAGCAAGTCTGATGTGAAAACCC  
GGGGCTCAACCCCGGACTGCATTGAAACTGTTGATCTAGAGTGTGCGAGAGGTAAGTGAATTCCTAGTGTAGCGGTG  
AAATGCGTAGATATTAGGAGGAACACCAGTGGCGAAGGCGGCTTACTGGACGATGACTGACGTTGAGGCTCGAAAGCGTG  
GGGAG

>ASV:707:Genus:Bacteroides

TACGGAGGATCCGAGCGTTATCCGGATTTATTGGGTTAAAGGGAGCGTAGGTGGATTGTTAAGTCAGTTGTGAAAAGTTT  
GCGGCTCAACCGTAAAATTGCAGTTGAAACTGGTAGTCTTGAGTACAGTAGAGGTGGGCGGAATTCCTGGTGTAGCGGTG  
AAATGCTTAGATATCACGAAGAACCAGTGGCGAAGGCGAGCTACTAGACTGTAACGACACTGATGCTCGAAAGTGTG  
GGTAT

>ASV:708:Genus:Intestinimonas

TACGTAGGTGGCGAGCGTTATCCGGATTTACTGGGTGTAAGGGGCGTAGGCGGGAGTCAAGTCAGATGTGAAAACCTA  
TGGGCTCAACCCATAGCCTGCATTTGAAACTGTACTTCTTGAGTGATGGAGAGGCGAGGCGGAATTCCTGTGTAGCGGTG  
AAATGCGTAGATATTAGGAGGAACACCAGTGGCGAAGGCGGCTGCTGGACATTAACGACGCTGAGGCGGAAAGCGTG  
GGGAG

>ASV:709:Genus:Ruminococcus\_1

TACGTAGGGAGCGAGCGTTGTCCGGAATTACTGGGTGTAAGGGAGCGTAGGCGGGATCGCAAGTCAGATGTGAAAACCTA  
TGGGCTTAACCCATAAACTGCATTTGAAACTGTGTTCTTGAGTGAAGTAGAGGTAAGCGGAATTCCTAGTGTAGCGGTG  
AAATGCGTAGATATTAGGAGGAACATCAGTGGCGAAGGCGGCTTACTGGGCTGTAACGACGCTGAGGCTCGAAAGCGTG  
GGGAG

>ASV:710:Genus:Prevotella\_9

TACGGAAGGTCGCGGCTTATCCGGATTTATTGGGTTAAAGGGAGCGTAGGCTGGAGATTAAGCGTGTGTGAAATGTA  
GATGCTCAACGCTGCACTGCAGCGCAACTGGTTTCTTGAGTACGCACAAGTGGGCGGAATTCCTGGTGTAGCGGTG  
AAATGCTTAGATATCACGAAGAACCAGTGGCGAAGGCGAGCTACTGGAGCGCAACTGACGCTGAAGCTCGAAAGTGGC  
GGTAT

>ASV:711:Genus:Ruminococcaceae\_UCG-010

TACGTAGGTGGCAAGCGTTATCCGGATTTATTGGGTGTAAGGGGTGTAGGCGGGACTGCAAGTCAGACGTGAAAATCA  
TGGGCTCAACCCATGACTTGCCTTTGAAACTGCGGTTCTTGAGAGTGGGAGAGGTAACCGGAATTCCTGGTGTAGCGGTG  
AAATGCGTAGATATTAGGAGGAACACCAGTGGCGAAGGCGGTTACTGGACCAACTGACGCTGAGACACGAAAGCGTG  
GGGAG

>ASV:712:Genus:Anaerostipes

TACGTAGGGGGCAAGCGTTATCCGGAATTACTGGGTGTAAGGGTGCCTAGGTGGTATGGCAAGTCAGAAGTAAAACCC  
TGGGCTTAACCTGCGACTGCTTTTGAAGTGCAGACTGGAGTGCAGGAGAGGTAAGCGGAATTCCTAGTGTAGCGGTG  
AAATGCGTAGATATTAGGAGGAACATCAGTGGCGAAGGCGGCTTACTGGACTGAAACTGACACTGAGGCACGAAAGCGTG  
GGGAG

>ASV:713:Order:Mollicutes\_RF39

TACGTAGGGAGCGAGCGTTATCCGGATTTATTGGGCGTAAAGGGTGCCTAGGCGGCTTGTAAAGTATGAAATTAAGGCC  
GGGGCTTAACCTCCGTTCTTTTATAAACTGGCTAGCTTGTAGTATGGAAGAGGTAACCGGAATTCCTAGTGTAGCGGTG  
AATGCGTAGATATTAGGAGGAACACCAGTGGCGAAGGCGGTTACTGGGCCATTACTGACGCTGAGGCACGAAAGCGTG  
GGAGC

>ASV:714:Genus:Lachnoclostridium

TACGTAGGGGGCAAGCGTTATCCGGATTTACTGGGTGTAAGGGAGCGTAGACGGCTGTGCAAGTCTGAAGTAAAAGCCC  
GGGGCTCAACCCCGGACTGCTTTGAAACTGTATAGCTAGAGTGTGAGAGGTAAGTGAATTCCTAGTGTAGCGGTG  
AAATGCGTAGATATTAGGAGGAACACCAGTGGCGAAGGCGGCTTACTGGACAGTACTGACGTTGAGGCTCGAAAGCGTG  
GGGAG

>ASV:715:Species:odontolyticus

TACGTAGGGCGCGAGCGTTGTCCGGAATTATTGGGCGTAAAGGGCTTGTAGGCGGTTGGTCGCTGCCGTGAAATCCT  
CTGGCTTAACGGGGCGTGCCTGGGTACGGCTGACTTGTAGTGCCTGAGGGAGACTGGAATTCCTGGTGTAGCGGTG  
GAATGCGCAGATATCAGGAAGAACCAGTGGCGAAGGCGGTTCTTGGGCCGTTACTGACGCTGAGGAGCGAAAGCGTG  
GGGAG

>ASV:716:Species:pleomorphus

TACGTAGGTGGCGAGCGTTATCCGGAATGATTGGGCGTAAAGGGTGCCTAGGCGGTACGGTAAGTCTGTAGTAAAAGCG  
GCAGCTCAACTGTGCTAGGCTATGAAACTGTGCAACTAGAGTGCAGAAGAGGGCGATGGAATTCCTAGTGTAGCGGTAA  
AATGCGTAGATATTAGGAGGAACACCAGTGGCGAAGGCGGCTGCCTGGTCTGTAACGACTGACGCTGAAGCACGAAAGCGTG  
GGAGC

>ASV:717:Family:Ruminococcaceae

TACGTAGGTGGCAAGCGTTGTCCGGAATTACTGGGTGTAAGGGAGCGTAGGCGGGCAGGCAAGTCAGGCGTGAAATATA  
TCGGCTCAACCCGGTAATGGCGCTTTGAAACTGCAGTCTTGAGTGAAGTAGAGGTTGGCGGAATTCCTAGTGTAGCGGTG  
AATGCGTAGATATTAGGAGGAACACCAGTGGCGAAGGCGGCTTACTGGACAGTAACTGACGCTGAGGCTCGAAAGTGTG  
GGAGC

>ASV:718:Genus:Lachnoclostridium

TACGTAGGGGGCAAGCGTTATCCGGATTTACTGGGTGTAAGGGAGCGTAGACGGTATAGCAAGTCTGAAGTAAAAGCCC  
GGGGCTCAACCCCGGACTGCTTTGAAACTGTTAAACTAGAGTGTGAGAGGTAAGTGAATTCCTAGTGTAGCGGTG  
AAATGCGTAGATATTAGGAGGAACACCAGTGGCGAAGGCGGCTTACTGGACAGTAACTGACGTTGAGGCTCGAAAGCGTG  
GGGAG

>ASV:719:Species:coli/flexneri  
TACGGAGGGTGC AAGCGTTAATCGGAATTACTGGGCGTAAAGCGCACGCAGGCGGTTTGTAAAGTCAGATGTGAAATCCC  
CAGGCTCAACCTGGGAACTGCATCTGATACTGGCAAGCTTGAGTCTCGTAGAGGGGGGTAGAATCCAGGTGTAGCGGTG  
AAATGCGTAGAGATCTGGAGGAATACCGGTGGCGAAGGCGGCCCCCTGGACGAAGACTGACGCTCAGGTGCGAAAGCGTG  
GGGAG

>ASV:720:Species:humiphilum/pekingense  
TACGTAGGGTGCAGCGTTGTCCGGAATTATTGGGCGTAAAGAGCTTGTAGGCGGCTTGTCCGCTCTGCTGTGAAAACCC  
GGGGCTTAACCCGGGCTTGCAGTGGGTACGGGCAGGCTAGAGTGTGGTAGGGGAGACTGGAATCCAGGTGTAGCGGTG  
GAATGCGCAGATATCAGGAGGAACACCGATGGCGAAGGCAGGTCTCTGGGCCATTACTGACGCTGAGAAGCGAAAGCGTG  
GGGAG

>ASV:721:Genus:Bilophila  
TACGGAGGGTGC AAGCGTTAATCGGAATCACTGGGCGTAAAGCGCACGCTAGGCGGCTTGGTAAGTCAGGGGTGAAATCCC  
ACAGCCCAACTGTGGAAGTGCCTTTGATACTGCCAGGCTTGTAGTACC GGAGAGGGTGGCGGAATCCAGGTGTAGGAGTG  
AAATCCGTAGATATCTGGAGGAACACCGGTGGCGAAGGCGGCCACCTGGACGGTAAGTACGCTGAGGTGCGAAAGCGTG  
GGTAG

>ASV:722:Species:auricularis/epidermidis/warneri  
TACGTAGGTGGCAAGCGTTATCCGGAATTATTGGGCGTAAAGCGCGCTAGGCGGTTTTTAAAGTCTGATGTGAAAGCCC  
ACGGCTCAACCTGGGAACTGCACTTGAAGTAACTGAAACTTTTCTTGGTGTGAGAGGAAAGTGAATCCAGTGTAGCGGTG  
AAATGCGCAGAGATATGGAGGAACACCGGTGGCGAAGGCGACTTTCTGGTCTGTAAGTACGCTGATGTGCGAAAGCGTG  
GGGAT

>ASV:723:Genus:Ruminococcaceae\_UCG-014  
TACGTAGGGAGCAAGCGTTATCCGGATTTATTGGGTGTAAAGGGTGCCTAGACGGGAAACAAGTTAGTTGTGAAATCCC  
TCGGCTTAACCTGGGAACTGCACTTGAAGTAACTGAAACTTTTCTTGGTGTGAGAGGAAAGTGAATCCAGTGTAGCGGTG  
AAATGCGTAGATATAGGAGGAACACCGGTGGCGAAGGCGACTTTCTGGACAGTAAGTACGCTTGGAGCACGAAAGGTG  
GGGAG

>ASV:724:Class:Gammaproteobacteria  
TACGGAGGGTGC AAGCGTTAATCGGAATAACTGGGCGTAAAGCGCACGCAGGCGGTTTGTCTAAGCTAGATGTGAAAGCCC  
CGGGCTCAACCTGGGAACTGCACTTGAAGTAACTGCACTTGGTGTGAGAGGGGGGTAGAATCCAGGTGTAGCGGTG  
AAATGCGTAGAGATCTGGAGGAATACCGGTGGCGAAGGCGGCCCCCTGGACAGAGACTGACGCTCAGGTGCGAAAGCGTG  
GGGAG

>ASV:725:Genus:Lachnospiraceae\_NK4B4\_group  
TACGTAGGGGGCAAGCGTTATCCGGATTTACTGGGTGTAAAGGGAGCGCAGGCGGCAGGGCAAGTCAGATGTGAAAGCCC  
GGGGCTCAACCCGGGACTGCATTTGAAACTGTCCAGCTGGAGTACAGGAGAGGCGAGGCGGAATCCAGTGTAGCGGTG  
AAATGCGTAGATATAGGAGGAACACCGGTGGCGAAGGCGGCTGCTGGACTGTAAGTACGCTGAGGCTCGAAAGCGTG  
GGGAG

>ASV:726:Genus:Merdibacter  
TACGTAGGTGGCGAGCGTTATCCGGAATGATTGGGCGTAAAGGGTGCCTAGGTGGCACGATAAGTCTGGAGTAAAGGGGA  
GCGGCTCAACCGCTGTTGGCTCTGGAAGTGTGAGCTAGAGAGCAGGAGAGGGCGATGGAATCCAGTGTAGCGGTAA  
AATGCGTAGATATAGGAGGAACACCGGTGGCGAAGGCGGCTGCCTGGCTGCAACTGACACTGAAGCACGAAAGCGTG  
GGAGC

>ASV:727:Species:amni/sanguinegens  
TACGTATGTTGCGAGCGTTATCCGGAATTATTGGGCTTAAAGGGCATCTAGGCGGTAAGACAAGTTGAAGGTGAAAACCT  
GTGGCTCAACCATAGGCTTGCCTACAAAAGTGTGAACTAGAGTACTGGAAAGGTGGGTGGAAGTACACGAGTAGAGGTG  
AAATTCGTAGATATGTGTAGGAATGCCGATGATGAAGATAACTCACTGGACAGAAACTGACGCTGAAGTGCAGAAAGCTAG  
GGGAG

>ASV:728:Family:Ruminococcaceae  
TACGTAGGTGGCAAGCGTTATCCGGAATTACTGGGTGTAAAGGGAGCGCAGGCGGGATAGCAAGTACGCTGTGAAAACCTA  
TGGGCTCAACCCATAAACTGCACTTGAAGTGTATTCTTGGTGTGAGTAGAGGCAAGCGGAATCCAGTGTAGCGGTG  
AAATGCGTAGATATCCGGAGGAACACCGGTGGCGAAGGCGGCTTGTGGGCTCTAAGTACGCTTGGAGCTCGAAAGGTG  
GGGAG

>ASV:729:Species:minuta  
TACGTAGGGAGCAAGCGTTGTCCGGAATTACTGGGCGTAAAGGGTGCCTAGGTGGTCTGTAAGTACAGATGTGAAAGACC  
GGGGCTTAACCCGGGTTGCATTTGAAACTGTGTGACTTGTAGTACAGGAGAGGGAAGTGAATCCAGTGTAGCGGTG  
AAATGCGTAGATATAGGAGGAACACCGGTGGCGAAGGCGACTTTCTGGACTGTAAGTACACTGAGGACGAAAGCGTG  
GGGAG

>ASV:730:Order:Mollicutes\_RF39  
TACGTAGGGGGCGAGCGTTATCCGGATTTATTGGGCGTAAAGCGTTCGTAGGCGGTTTGTAAAGTCTAAGATTTAAGCCC  
GAGGCTCAACCTCGGTTCTGCTTAGAAACTGGCAAATTTGAGTGTGGTAGAGGCAAGTGAATTTCTAGTGTAGCGGTTA  
AATGCGTAGATATTAGAAAGGAACACCGGTGGCGAAGGCGGCTTGTGGGCTCACTGACGCTGAGGAAACGAAAGCGTG  
GGAGC

>ASV:731:Genus:Haemophilus  
TACGGAGGGTGCAGCGTTAATCGGAATAACTGGGCGTAAAGGGCACGCAGGCGGTGACTTAAAGTGAAGTGTGAAAGCCC  
CGGGCTTAACCTGGGAATTGCATTTCACTGGTGTGCTAGAGTACTTGGGAGGGGTAGAATCCAGTGTAGCGGTG  
AAATGCGTAGAGATGTGGAGGAATACCGAAGGCGAAGGCAGCCCTTGGGAAAGTACTGACGCTCATGTGCGAAAGCGTG  
GGGAG

>ASV:732:Genus:Ruminococcaceae\_UCG-005  
TACGTAGGTTGC AAGCGTTGTCCGGAATTACTGGGTGTAAAGGGCGTGTAGGCGGAGATGCAAGTTGGGAGTGAATCCA  
TGGGCTCAACCCATGAACTGCTCTCGAAACTGTATCCCTTGTAGTATCGGAGAGGCAAGCGGAATCCAGTGTAGCGGTG

AAATGCGTAGATATTAGGAGGAACACCAGTGGCGAAGGCGGCTTGTCTGGACGACAACGACGCTGAGGCGCGAAAGCGTG  
GGGAG  
>ASV:733:Species:antri/fermentum/frumenti/gasseri/oris/panis/reuteri/vaginalis  
TACGTAGGTGGCAAGCGTTATCCGGATTTATTGGGCGTAAAGCGAGCGCAGGCGGTTGCTTAGGTCTGATGTGAAAGCCT  
TCGGCTTAACCGAAGAAGTGCATCGGAAACCGGGCGACTTGAGTGCAGAAGAGGACAGTGGAACCTCCATGTGTAGCGGTG  
GAATGCGTAGATATATGGAAGAACACCAGTGGCGAAGGCGGCTGTCTGGTCTGCAACTGACGCTGAGGCTCGAAAGCATG  
GGTAG  
>ASV:734:Genus:Blautia  
TACGTAGGGGGCAAGCGTTATCCGGATTTACTGGGTGTAAGGGAGCGTAGACGGTGTGGCAAGTCTGATGTGAAAGGCA  
TGGGCTCAACCTGTGGACTACATTGAAACTGTCATACTTGAGTGCCGGAGGGGTAAGCGGAATTCCTAGTGTAGCGGTG  
AAATGCGTAGATATTAGGAGGAACACCAGTGGCGAAGGCGGCTTACTGGACGTAACGACGTTGAGGCTCGAAAGCGTG  
GGGAG  
>ASV:735:Genus:Blautia  
TACGTAGGGGGCAAGCGTTATCCGGATTTACTGGGTGTAAGGGAGCGTAGACGGACGGCAAGTCTGATGTGAAAGGCC  
GGGGCTTAACCCGGGACTGCATTGAAACTGTCATCTTGAGTGCCGAAGAGGTAAGCGGAATTCCTAGTGTAGCGGTG  
AAATGCGTAGATATTAGGAGGAACACCAGTGGCGAAGGCGGCTTACTGGACGTAACGACGTTGAGGCTCGAAAGCGTG  
GGGAG  
>ASV:736:Genus:Parabacteroides  
TACGGAGGATCCGAGCGTTATCCGGATTTATTGGGTTTAAAGGGTGCAGTGGCGGCTTTTAAAGTCAAGCGGTGAAAGTCT  
GTGGCTCAACCATAGAATTGCCGTTGAAACTGGGGGCTTGAGTATGTTTGAGGCAGGCGGAATGCGTGGTGTAGCGGTG  
AAATGCATAGATATCACGCAAGAACCCGATTGCGAAGGCAGCCTGCTAAGCTGCAACTGACATTGAGGCTCGAAAGTGTG  
GGTAT  
>ASV:737:Genus:Lactococcus  
TACGTAGGTCCCAGCGTTGTCCGGATTTATTGGGCGTAAAGCGAGCGCAGGTGGTTTATTAAGTCTGGTGTAAAAGGCA  
GTGGCTCAACCATTTGATGCAATTTGAAACTGGTAGACTTGAGTGCAGGAGAGGAGAGTGGAAATTCCTAGTGTAGCGGTG  
AATGCGTAGATATTAGGAGGAACACCAGTGGCGAAGGCGGCTCTCTGGACTGTAACGACACTGAGGCTCGAAAGCGTG  
GGAGC  
>ASV:738:Genus:Bacteroides  
TACGGAGGATCCGAGCGTTATCCGGATTTATTGGGTTTAAAGGGAGCGTAGGCGGACGCTTAAAGTCAAGTGTGAAAGTTT  
GCGGCTTAACCGTAAAATTGCAAGTTGATACTGGGTGCTTGAGTACAGTAGAGGCGAGGCGGAATTCCTGGTGTAGCGGTG  
AAATGCTTAGATATCACGAAGAACCCTCGATTGCGAAGGCAGCCTGCTAAGCTGCAACTGACGCTGATGCTCGAAAGTGTG  
GGTAT  
>ASV:739:Genus:Marvinbryantia  
TACGTAGGGGGCAAGCGTTATCCGGATTTACTGGGTGTAAGGGAGCGTAGACGGCTTTGCAAGTCTGATGTGAAAGGCG  
GGGGCTCAACCCCTGACTGCATTGAAACTGTGAGGCTTGAGTGCCGGAGAGGTAAGCGGAATTCCTAGTGTAGCGGTG  
AAATGCGTAGATATTAGGAGGAACACCAGTGGCGAAGGCGGCTTACTGGACGTAACGACGTTGAGGCTCGAAAGCGTG  
GGGAG  
>ASV:740:Species:coprophilus  
TACGGAGGATCCGAGCGTTATCCGGATTTATTGGGTTTAAAGGGAGCGTAGACGGGTTTTAAAGTCAAGTGTGAAAGTTT  
GGGGCTCAACCTTAAAATTGCAAGTTGAAACTGGAGACCTTGAGTACGTTGAGGCGAGGCGGAATTCCTGGTGTAGCGGTG  
AAATGCTTAGATATCACGAAGAACCCTCGATTGCGAAGGCAGCCTGCTAAGCCGCCACTGACGTTGAGGCTCGAAAGTGGC  
GGTAT  
>ASV:741:Genus:Ruminococcaceae\_UCG-005  
TACGTAGGTTGCAAGCGTTGTCCGGATTTACTGGGTGTAAGGGCGGTAGGCGGAGATGCAAGTCCGGAGTGAATCCA  
TGGGCTCAACCCATGAACTGCTTTCGAAACTGTATCCCTTGAGTATCGGAGAGGCAAGCGGAATTCCTAGTGTAGCGGTG  
AAATGCGTAGATATTAGGAGGAACACCAGTGGCGAAGGCGGCTTGTCTGGACGACAACGACGCTGAGGCGCGAAAGCGTG  
GGGAG  
>ASV:742:Species:buccalis  
TACGGAAGGTCGGGGCTTATCCGGATTTATTGGGTTTAAAGGGAGCGTAGGCGGCCAGGTAAGCGTGTGTGAAATGTA  
CCGGCTCAACCCGGTGAATTGCAGCGCAACTGTCTGGCTTGAGTGCAGGTAAGCAGGCGGAATTCATGGTGTAGCGGTG  
AAATGCTTAGATATCATGAAGAACCCTCGATTGCGAAGGCAGCCTGCTGCAGTGCAGTGCAGCTGACGCTGATGCTCGAAGGTGCG  
GGTAT  
>ASV:743:Genus:Agathobacter  
TACGTATGGTGAAGCGTTATCCAGATTTACTGGGTGTAAGGGAGCGCAGGCGGTGCGGCAAGTCTGATGTGAAAGCCC  
GGGGCTCAACCCCGTACTGCATTGAAACTGTCGTAAGTGTGCGGAGGGTAAGCGGAATTCCTAGTGTAGCGGTG  
AAATGCGTAGATATTAGGAGGAACACCAGTGGCGAAGGCGGCTTACTGGACGATAACGACGCTGAGGCTCGAAAGCGTG  
GGGAG  
>ASV:744:Genus:Bacteroides  
TACGGAGGATCCGAGCGTTATCCGGATTTATTGGGTTTAAAGGGAGCGTAGATGGATGTTTAAAGTCAAGTGTGAAAGTTT  
GCGGCTCAACCGTAAAATTGCAAGTTGATACTGGATGTCTTGAGTGCAGGTAAGCAGGCGGAATTCCTGGTGTAGCGGTG  
AAATGCTTAAATATCACGAAGAACCCTCGATTGCGAAGGCAGCCTGCTAAGCTGCAACTGACATTGAGGCTCGAAAGTGTG  
GGTAT  
>ASV:745:Species:propionicifaciens  
TACGTAGGTGGCAAGCGTTGTCCGGAATTTATTGGGCGTAAAGCGCGCGCAGGCGGCTTCTAAGTCCATCTTAAAAGTGC  
GGGGCTTAACCCCGTGTAGGGATGAAACTGGGAAGTGGAGTATCGGAGAGGAAAGTGGAAATTCCTAGTGTAGCGGTG  
AATGCGTAGAGATTAGGAAGAACACCAGTGGCGAAGGCGGCTTCTGGACGAAAACGACGCTGAGGCGCGAAAGCGGTG  
GGAGC  
>ASV:746:Genus:Enterococcus

TACGTAGGTGGCAAGCGTTGTCCGGATTTATTGGGCGTAAAGCGAGCGCAGGCGGTCTTTAAGTCTGATGTGAAAGCCC  
CCGGCTTAACCGGGGAGGGTATTGAAAAGCTGGGAGACTTAGTGCAGAAGAGGAAAGCGGAATTCATGTGTAGCGGTG  
AAATGCGTAGATATATGAAGGAACACCAGTGGCGAAGGCGGCTTTCTGGTCTGTAACGACGCTGAGGCTCGAAAGCGTG  
GGGAG

>ASV:747:Genus:Erysipelatoclostridium

TACGTAGGTGGCAAGCGTTATCCGGATTTACTGGGCTAAAGAGGGAGCAGGCGGCAGCAAGGGTCTGTGGTAAAAGCCT  
GAAGCTTAACCTCAGTAAGCCATAGAAACAGGCAGCTAGAGTGCAGGAGAGGATCGTGAATTCATGTGTAGCGGTGA  
AATGCGTAGATATATGAGGAACACCAGTAGCGAAGGCGACGATCTGGCTGCAACTGACGCTCAGTCCGAAAGCGGTG  
GGAG

>ASV:748:Family:Lachnospiraceae

TACGTAGGGGGCAAGCGTTATCCGGATTTACTGGGTGTAAGGGTGCCTAGGTGGCAAGGCAAGTCAAGTGTGAAAGCCC  
GGGGCTCAACCCGGTACTGCATTTGAAACTGTCTAGCTAGAGTGCAGGAGGGGTAAGCGGAATTCCTAGTGTAGCGGTG  
AAATGCGTAGATATTAGGAGGAACACCAGTGGCGAAGGCGGCTTACTGGACTGTAACGACACTGAGGCACGAAAGCGTG  
GGGAG

>ASV:749:Family:Lachnospiraceae

TACGTAGGGGGCAAGCGTTATCCGGATTTACTGGGTGTAAGGGAGCGTAGACGGCGATGCAAGTCTGAAGTAAAAGCCC  
GGGGCTCAACCCGGGACTGCTTTGAAACTGTGTGGCTGGAGTGCAGGAGAGGTAAGTGAATTCCTAGTGTAGCGGTG  
AAATGCGTAGATATTAGGAGGAACACCAGTGGCGAAGGCGGCTTACTGGACTGTAACGACGTTGAGGCTCGAAAGCGTG  
GGGAG

>ASV:750:Genus:Ruminiclostridium\_9

TACGTAGGTGGCAAGCGTTATCCGGATTTACTGGGTGTAAGGGCGTGTAGGCGGGATCGCAAGTCAAGTGTAAAAGCTG  
GAGGCTCAACCTCCGGCCTGCATTTGAAACTGTGGTCTTGTAGTACTGGAGAGGCAGACGGAATTCCTAGTGTAGCGGTG  
AAATGCGTAGATATTAGGAGGAACACCAGTGGCGAAGGCGGCTTCTGGACAGCAACTGACGCTGAGGCGCGAAAGCGTG  
GGGAG

>ASV:751:Genus:Stenotrophomonas

TACGAAGGGTGAAGCGTTACTCGGAATTTACTGGGCGTAAAGCGTGCCTAGGTGGTGTAAAGTCTGTTGTAAAAGCCC  
TGGGCTCAACCTGGGAATTCAGTGGATACTGGGCGACTAGAGTGTGGTAGGGGAGTGGGAATTCCTAGTGTAGCGGTG  
AAATGCGTAGATATTAGGAGGAACACCAGTGGCGAAGGCGAGCTACCTGGACCAACACTGACACTGAGGCACGAAAGCGTG  
GGGAG

>ASV:752:Order:Clostridiales

TACGTAGGGGGCGAGCGTTGTCCGGATTTACTGGGCGTAAAGGGTGCCTAGGCGGTACTTTAAGTTGGATGTGAAATCCC  
CGGGCTTAACCTGGGCTGCATCAATACTGGAGAACTAGAGTGCAGGAGAGGGAAGCGGAATTCCTAGTGTAGCGGTG  
AAATGCGTAGATATTAGGAAGAACACCAGTGGCGAAGGCGGCTTTCTGGACTGTAACGACGCTGAGGCACGAAAGCGTG  
GGGAG

>ASV:753:Genus:Lachnospira

TACGTATGGAGCAAGCGTTATCCGGATTTACTGGGTGTAAGGGAGTGTAGGTGGCATCACAAGTCAAGTGAAGTAAAAGCCC  
GGGGCTCAACCCGGGACTGCTTTGAAACTGTGGAGCTGGAGTGCAGGAGAGGCAAGTGAATTCCTAGTGTAGCGGTG  
AAATGCGTAGATATTAGGAGGAACACCAGCGGCGAAGGCGGCTTCTGGACTGTAACGACACTGAGGCTCGAAAGCGTG  
GGGAG

>ASV:754:Genus:Enterorhabdus

TACGTAGGGGGCGAGCGTTATCCGGAATGATTGGGCGTAAAGCGCGCGCAGGCGGCGCTCAAGCGGGACCTCTAACCCC  
GGGGCTCAACCCGGGCGGGTCCCGAACTGGGCGGCTCAGTGCCTAGGAGAGGCAAGTGAATTCCTAGTGTAGCGGTGA  
AATGCGCAGATATTTGGAAGAACACCAGTGGCGAAGGCGAGCTCTCTGGGCCGCTACTGACGCTGAGGCGCGAAAGCGGG  
GGAG

>ASV:755:Genus:Ruminococcaceae\_UCG-005

TACGTAGGTGCGAGCGTTGTCCGGATTTACTGGGTGTAAGGGCGTGTAGGCGGAGATGCAAGTTGGGAGTAAAATCCA  
TGGGCTCAACCCGATGAATTCGAAACTGTATCCCTTGTAGTATCGGAGAGGCAAGCGGAATTCCTAGTGTAGCGGTG  
AAATGCGTAGATATTAGGAGGAACACCAGTGGCGAAGGCGGCTTCTGGACGACAACGACGCTGAGGCGCGAAAGCGTG  
GGGAG

>ASV:756:Genus:Catenibacterium

TACGTAGGTGGCGAGCGTTATCCGGAATCATTGGGCGTAAAGAGGGAGCAGGCGGCTGCAAGGGTCTGTGGTAAAAGACC  
GAAGCTAAAACCTCGGTAAGCCATGAAACCCGGGCGGCTAGAGTGCAGGAGAGGATCGTGAATTCATGTGTAGCGGTGA  
AATGCGTAGATATATGAGGAACACCAGTGGCGAAGGCGACGGTCTGGGCCGCAACTGACGCTCATTCCGAAAGCGGTG  
GGAG

>ASV:757:Order:Chloroplast

GACAGAGGATGCAAGCGTTATCCGGAATGATTGGGCGTAAAGCGTCTGTAGGTGGCTTTTCAAGTCCGCGCTCAATCCC  
AGGGCTCAACCTCGGACAGGCGGTGGAACCTCAAGCTGGAGTACGGTAGGGGAGAGGGAATTCCTAGTGTAGCGGTG  
AAATGCATTGAGATCGGAAAGAACACCAACGCGGAAAGCACTCTGCTGGGCCGACACTGACACTGAGAGACGAAAGCTAG  
GGGAG

>ASV:758:Genus:Sellimonas

TACGTAGGGGGCAAGCGTTATCCGGATTTACTGGGTGTAAGGGAGCGTAGACGGCTCTGCAAGTCTGGAGTAAAAGCCC  
GGGGCTCAACCTGGGACTGCTTTGAAACTGTGGAGCTTGTAGTACGGAGGGGTAAGCGGAATTCCTAGTGTAGCGGTG  
AAATGCGTAGATATTAGGAGGAACACCAGTGGCGAAGGCGGCTTACTGGACGGTAACTGACGTTGAGGCTCGAAAGCGTG  
GGGAG

>ASV:759:Species:massiliensis/sartorii

TACGAGGATCCGAGCGTTATCCGGATTTATTGGGTTAAAGGGAGCGTAGATGGGTTGTTAAGTCAAGTGTGAAAGTTT  
GCGGCTCAACCGTAAAATTGCAATTGATACTGGCAGCCTTGTAGTACAGTTGAGGTAGGCGGAATTCGTGGTGTAGCGGTG  
AAATGCTTAGATATCACGAAGAACCTCGATTGCGAAGGCGAGCTACTAACTGCCACTGACATTGATGCTCGAAAGTGTG



GGTAT

>ASV:760:Genus:Ruminococcaceae\_UCG-010

TACGTAGGTGGCAAGCGTTATCCGGATTTACTGGGTGTAAGGGTGTGTAGGCGGGACGACAAGTCAGATGTGAAACTCA  
TGGGCTCAACCCATGACCTGCATTTGAAACTGCCGTTCTTGAGAGTTCGGAGAGGTAATGGAATTCCTAGTGTAGCGGTG  
AAATGCGTAGATATCGGAGGAACACCAGTGGCGAAGGCGATTTACTGGACGACCACTGACGCTGAGACACGAAAGCGTG  
GGGAG

>ASV:761:Genus:GCA-900066225

TACGTAGGTGGCAAGCGTTGTCCGGAATTACTGGGTGTAAGGGGAGCGTAGGCGGGAAGGCAAGTTGGACGTTTAACTCA  
TCGGCTCAACCCATGACCTGCATTTCAAACCTGTTTTCTTGAGTGAAGTAGAGGTAAGCGGAATTCCTAGTGTAGCGGTGA  
AATGCGTAAATATTAGGAGGAACACCAGTGGCGAAGGCGGCTTACTGGGCTTAACTGACGCTGAGGCTCGAAAGCGTGG  
GTAGC

>ASV:762:Order:DTU014

TACGTAGGTGGCGAGCGTTGTCCGGAATTACTGGGCGTAAAGGGCGCGTAGGCGGATCGTTAAGTTGGACGTGAAATACC  
CCGGCTCAACTGGGGGCGACGCTCCAAAACCTGGCGGACTAGAGTGCAGGAGAGGAAAGTAGAATTCCTAGTGTAGCGGTG  
AAATGCGTAGATATTGGGAGGAATACCGGTGGCGAAGGCGGCTTCTGGACTGTAACGACGCTGAGGCGCGAAAGCTGG  
GGGAG

>ASV:763:Species:succinatimandens

TACGTAGGGTGCAGCGTTAATCCGGAATTACTGGGCGTAAAGGGTGCAGGCGGCCCTGTAAGACCGGTGTGAAATCCC  
CGGGCTCAACCTGGGAATTGCGCTGGTACTGACGGGCTAGAGTACGGTAGAGGGGGTGAATTCCTGGTGTAGCAGTG  
AAATGCGTAGAGATCAGGAGGAACACCAGTGGCGAAGGCGCCCTGGGCTGTACTGACGCTCATGCACGAAAGCGTG  
GGGAG

>ASV:764:Family:Peptococcaceae

TACGTAGGGGGCGAGCGTTGTCCGGAATCACTGGGCGTAAAGGGCGCGTAGGCGGTCAGATAAGTCAGTGGTAAAACCTG  
GGGGCTCAACCTCCAGCCTGCCACTGATACTGTCAGACTTGAAGAGGAGAATGGAATTCCTAGTGTAGCGGTG  
AAATGCGTAGATATTAGGAGGAACACCAGTGGCGAAGGCGATTTCTGGGCCAAGACTGACGCTGAGGCGCGAAAGCGTG  
GGGAG

>ASV:765:Genus:Ruminococcaceae\_NK4A214\_group

TACGTAGGTGGCAAGCGTTATCCGGATTTACTGGGTGTAAGGGCGCGTAGGCGGGGATACAAGTCAGATGTGAAATCTA  
TGGGCTTAAACCATAAACTGCATTTGAAACTGTATCTCTTGAGTGTCCGAGAGGTAGACGGAATTCCTAGTGTAGCGGTG  
AAATGCGTAGATATTAGGAGGAACACCAGTGGCGAAGGCGGCTTACTGGACGATAACTGACGCTGAGGCGCGAAAGCGTG  
GGGAG

>ASV:766:Genus:Roseburia

TACGTATGGTGCAGCGTTATCCGGATTTACTGGGTGTAAGGGGAGCGCAGGCGGGAGGCTAAGTCTGATGTGAAAGCCC  
GGGGCTCAACCCCGTACTGCATTGAAAACCTAGAGTGTCCGAGGGGTAAGTGAATTCCTAGTGTAGCGGTG  
AAATGCGTAGATATTAGGAGGAACACCAGTGGCGAAGGCGGCTTACTGGACGATTACTGACGCTGAGGCTCGAAAGCGTG  
GGGAG

>ASV:767:Family:Lachnospiraceae

TACGTAGGGGGCAAGCGTTATCCGGATTTACTGGGTGTAAGGGGAGCGTAGACGGCGTAGCAAGTCTGAAGTAAAAGCCC  
GGGGCTCAACCCGGGACTGCTTTGAAAACCTGTTATGCTAGAGTGTCCGAGAGGTAAGTGAATTCCTAGTGTAGCGGTG  
AAATGCGTAGATATTAGGAGGAACACCAGTGGCGAAGGCGGCTTACTGGACGATAACTGACGTTGAGGCTCGAAAGCGTG  
GGGAG

>ASV:768:Genus:CAG-56

TACGTAGGGGGCAAGCGTTATCCGGATTTACTGGGTGTAAGGGGAGCGTAGACGGCGAGGCAAGTCTGATGTGAAAACCC  
GGGGCTCAACCCCGTACTGCATTGAAAACCTGTTTGGCTTGGAGAGGTAAGCAGGAAATTCCTAGTGTAGCGGTG  
AAATGCGTAGATATTAGGAGGAACACCAGTGGCGAAGGCGGCTTACTGGACGTAAGTACTGACGTTGAGGCTCGAAAGCGTG  
GGGAG

>ASV:769:Genus:Butyricimonas

TACGGGGGATGCGAGCGTTATCCGGATTTATTGGGTTTAAAGGGCGCGTAGGCGGGACGCCAAGTCAGCGGTAAAAGACT  
GCAGCTAAACTGTAGCAGCGCTTGAACCTGGCGACCTCGAGACGAGACGAGGGAGGCGGAACAGTGAAGTAGCGGTGA  
AATGCTTAGATATCACTTGAACCCCGATAGCGAAGGCGAGCTTCCAGGCTCGATCTGACGCTGATGCGGAGAGCGTGG  
GTAGC

>ASV:770:Genus:Bacteroides

TACGGAGGATCCGAGCGTTATCCGGATTTATTGGGTTTAAAGGGGAGCGTAGATGGATGTTTAAAGTCAAGTGTGAAAAGTTT  
ACGGCTCAACCCGTAATGCAAGTGTACTGGATATCTTGAGTGCAGTTGAGGCGAGCGGAATTCCTGGTGTAGCGGTG  
AAATGCTTAGATATCACGAAGAATCCGATTGCGAAGGCGAGCTGCTAAGCTGCAACTGACATTGAGGCTCGAAAGTGTG  
GGTAT

>ASV:771:Genus:Ruminococcaceae\_UCG-014

TACGTAGGGAGCAAGCGTTATCCGGATTTATTGGGTGTAAGGGTGCCTAGACGGGAGATTAAGTTAGTTGTGAAAAGCCC  
TCGGCTTAACTGAGGAATTGCAACTAAAACCTGGTTTTCTTGAGTGCAGGAGAGGTAAGTGAATTCCTAGTGTAGCGGTG  
AAATGCGTAGATATTAGGAGGAACACCAGTGGCGAAGGCGACTTACTGGACTGTAACGACGTTGAGGCGCGAAAGTGTG  
GGGAG

>ASV:772:Species:fastidiosus

TACGGAAGATGCGAGCGTTATCCGGATTTATTGGGTTTAAAGGGTGCCTAGGCGGAAGAATAAGTCAAGCGGTGAAATGCT  
TCAGCTCAACTGGAGAAATGCGGATGAAAACCTGTTTTCTAGAGTATAAAAGAGGTATGCGGAATGCGTGGTGTAGCGGTG  
AAATGCGTAGATATCACGAGAACCCGATTGCGAAGGCGAGCATACTGGGCTATAACTGACGCTGAAGCACGAAAGCGTG  
GGTAT

>ASV:773:Species:nucleatum

TACGTATGTCAGGAGCGTTATCCGGATTTATTGGGCGTAAAGGCGGCTAGGTTGTTATGTAAGTCTGATGTGAAAATGC

AGGGCTCAACTCTGTATTGCGTTGAAACTGTATAACTAGAGTACTGGAGAGGTAAGCGGAAC TACAAGTGTAGAGGTGA  
AATTCGTAGATATTTGTAGGAATGCCGATGGGGAAGCCAGCTTACTGGACAGATACTGACGCTAAAGCGCGAAAGCGTGG  
GTAGC  
>ASV:774:Genus:Barnesiella  
TACGGAGGATGCGAGCGTTATCCGGATTTATTGGGTTTAAAGGGTGCCTAGGCGGCACGCCAAGTCAGCGGTGAAATTT  
CGGGCTCAACCCGGAGTGTGCCGTTGAAACTGGTGAAGTACTAGAGTACACAAGAGGCAGCGGAATGCGTGGTGTAGCGGTG  
AAATGCATAGATATCACGCAGAACCCCGATTGCGAAGGCAGCTGCTAGGGTGAACAGACGCTGAGGCACGAAAGCGTG  
GGTAT  
>ASV:775:Genus:Cloacibacterium  
TACGGAGGGTGAAGCGTTATCCGGATTTATTGGGTTTAAAGGGTCCGTAGGCGGACTTATAAGTCAGTGGTGAATCCT  
GTCGCTTAACGATAGAACTGCCATTGATACTGTAAGTCTTGAAGTATATTTGAGGTAGCTGGAATAAGTAGTGTAGCGGTG  
AAATGCATAGATATTAAGTGAACACCAATTGCGAAGGCAGGTTACCAAGATATAACTGACGCTGAGGGACGAAAGCGTG  
GGGAG  
>ASV:776:Family:Lachnospiraceae  
TACGTAGGGGCAAGCGTTATCCGGATTTACTGGGTGTAAGGGGAGCGTAGACGGTCAAGCAAGTCAGAAGTAAAAGGCT  
GGGGCTCAACCCGGGACTGCTTTTGAAGTCTTGAAGTACTAGAGTGTGGAGAGGTAAGCGGAATTCCTAGTGTAGCGGTG  
AAATGCGTAGATATTAAGGAGGAACACCAAGTGGCGAAGGCGGCTTACTGGACAGTAACGACGTTGAGGCTCGAAAGCGTG  
GGGAG  
>ASV:777:Family:Lachnospiraceae  
TACGTATGGTGAAGCGTTATCCGGATTTACTGGGTGTAAGGGGAGCGTAGACGGATAAGCAAGTCTGGAGTAAAAGCC  
GGGGCTCAACCCGGGACTGCTTTTGAAGTCTTGAAGTACTAGAGTGTGGAGAGGTAAGTGAATTCCTAGTGTAGCGGTG  
AAATGCGTAGATATTAAGGAGGAACACCAAGTGGCGAAGGCGGCTTACTGGACAGTACGACGTTGAGGCTCGAAAGCGTG  
GGGAG  
>ASV:778:Family:Lachnospiraceae  
TACGTATGGGGCAAGCGTTATCCGGATTTACTGGGTGTAAGGGGAGCGTAGGCGGTACGGCAAGTCAGAAGTAAAAGCCT  
GGGGCTCAACCCGGAATTGCTTTTGAAGTCTGCGACTAGAGTGTGGAGGGGTAAGCGGAATTCCTAGTGTAGCGGTG  
AAATGCGTAGATATTAAGGAGGAACACCGTGGCGAAGGCGGCTTACTGGACGACCACTGACGCTGAGGCTCGAAAGCGTG  
GGGAG  
>ASV:779:Genus:Ruminiclostridium\_5  
TACGTAGGGAGCAAGCGTTGTCCGGATTTACTGGGTGTAAGGGTGCCTAGGCGGTTTTGCAAGTCAGGAGTAAAATCCA  
TGGGCTTAACCCATGAAGTGTCTTTTGAAGTCTGCAAGACTTGAAGTGAAGTAGAGGTAGGCGGAATTCCTAGTGTAGCGGTG  
AAATGCGTAGATATCGGAGGAACACCAAGTGGCGAAGGCGGCTTACTGGGCTTAACTGACGCTGAGGCACGAAAGCATG  
GGTAG  
>ASV:780:Genus:Muribaculum  
TACGGAGGATGCGAGCGTTATCCGGATTTATTGGGTTTAAAGGGTGCCTAGGCGGAAC TCCAAGTCAGCGGTAAAAATC  
GGGGCTCAACCCCGTGCCTGTTGAAACTGGAGTCTTGAAGTGGGCGAGAAGTATGCGGAATGCGTGGTGTAGCGGTGA  
AATGCATAGATATCACGCAGAACCCCGATTGCGAAGGCAGCATAACCGCGCCCAACTGACGCTGAAGCACGAAAGCGTGG  
GTATC  
>ASV:781:Genus:Erysipelotrichaceae\_UCG-006  
TACGTAGGTGCGAGCGTTATCCGGATTTATTGGGCGTAAAGGGTGCCTAGGCGGCCTTTTAAAGTTTGTGGTAAAAGCGT  
GGGGCTCAACCCATACAGCCATAGATACTGGGAGGCTAGAGTACTGGAGAGGTTAGTGAATTCATGTGTAGCGGTAA  
AATGCGTAGATATATGGAGGAACACCCGTTGGCGAAGGCGGCTACCTAGCCAGAGACTGACGCTGAGGCACGAAAGCGTGG  
GGAGC  
>ASV:782:Genus:Christensenellaceae\_R-7\_group  
TACGTAGGGGCGAGCGTTGTCCGGATTTACTGGGCGTAAAGGGGCGCTAGGCGGCTGTGTAAGTCTGGAGTAAAAGTCC  
TGCTTTTAAAGTGGGAATTGCTTTGGAGACTGCATGGCTTGAAGTGGCGAAGAGGCAAGTGAATTCCTAGTGTAGCGGTG  
AAATGCGTAGAGATTGGGAAGAACACCAAGTGGCGAAGGCGACTTGTGGGCCGTAACGACGCTGAGGCGCGAAAGCGTG  
GGGAG  
>ASV:783:Family:Lachnospiraceae  
TACGTATGGGGCAAGCGTTATCCGGATTTACTGGGTGTAAGGGGAGCGTAGGCGGTATGGCAAGTCAGAAGTAAAAGCCT  
GGGGCTCAACCCGGAAGTGTCTTTTGAAGTGTCAAACTAGAGTGTGGAGGGGTAAGCGGAATTCCTAGTGTAGCGGTG  
AAATGCGTAGATATTAAGGAGGAACACCCGTTGGCGAAGGCGGCTTACTGGACGACCACTGACGCTGAGGCTCGAAAGCGTG  
GGGAG  
>ASV:784:Genus:Subdoligranulum  
AACGTAGGGTGAAGCGTTGTCCGGATTTACTGGGTGTAAGGGGAGCGCAGGCGGACCGGTAAGTTGGAAGTAAAAGTAA  
TGGGCTCAACCCATAAATTGCTTTCAAAGTGTGCTGGCCTTGAAGTGTGACAGAGGTAGGTGAATTCCTAGTGTAGCGGTG  
GAATGCGTAGATATCGGAGGAACACCAAGTGGCGAAGGCGGCTTACTGGGCGCAACTGACGCTGAGGCTCGAAAGCATG  
GGTAG  
>ASV:785:Genus:Prevotella\_9  
TACGGAAGGTCGGGCGTTATCCGAATTTATTGGGTTTAAAGGGGAGCGTAGGCGGAGATTAAGCGTGTGTGAAATGTA  
GACGCTCAACGCTGCTGACTGCAGCGCAACTGGTTTCTTGAAGTACGCACAAAGTGGGCGGAATTCCTAGTGTAGCGGTG  
AAATGCTTAGATATCACGAAGAAGTCCGATTGCGAAGGCAGCTCACTGGAGCGCAACTGACGCTGAAGCTCGAAAGTGGC  
GGTAT  
>ASV:786:Genus:Faecalitalea  
TACGTAGGTGGCAAGCGTTATCCGGATTTACTGGGCGTAAAGGGGAGCGTAGGCGGTGATTAAAGTCTGAAGTAAAAGCCA  
GCAGCTCAACTGCTGTAAAGCTTTGAAACTGGTGTACTAGAGTGCAGGAGAGGGCGATGGAATTCCTAGTGTAGCGGTAA  
AATGCGTAGATATTAAGGAGGAACACCAAGTGGCGAAGGCGGCTGCGCTGGCCTGCAACTGACACTGAGGCACGAAAGCGTG  
GGAGC

>ASV:787:Genus:Christensenellaceae\_R-7\_group  
TACGTAGGGGGCAAGCGTTGTCCGGAATGATTGGGCGTAAAGGGCGCGTAGGCGGCCTGATAAGTTTGAAGTGAAAGTCC  
TTCTTTAAGGAGGAACTGCTTTGAAACTGTGGGCTTGTAGTGCAGGAGAGGTAAGCGGAATCCCGGTGTAGCGGTG  
AAATGCGTAGATATCGGGAGGAACACCACTGGCGAAGGCGGCTTACTGGACTGTTACTGACGCTGAGGCGCGAAAGTGTG  
GGGAG

>ASV:788:Genus:Faecalibacterium  
AACGTAGGTCACAAGCGTTGTCCGGAATTAATGGGTGTAAAGGGAGCGCAGGCGGGAAGACAAGTTGGAAGTGAATCCA  
TGGGCTCAACCTATGAAGTGCATTTCAAACCTGTTTTCTTGTAGTGCAGAGGTAGGCGGAATCCCGGTGTAGCGGTG  
GAATGCGTAGATATCGGGAGGAACACCACTGGCGAAGGCGGCTACTGGGCAACCACTGACGCTGAGGCTCGAAAGTGTG  
GGTAG

>ASV:789:Species:aggregatus/massiliensis  
TACGTAGGGTCAAGCGTTGTCCGGAATTAATGGGCGTAAAGAGCTCGTAGGCGGTTTGTTCGCTCGGCTGTGAAAACCT  
GAGGCTCAACCTGAGGAACTGCACTGATCGATACGAGCAGACTAGAGTGTTCAGGGGAGACTGGAATTCCTGGTGTAGCGGTG  
AAATGCGCAGATATCAGGAGGAACACCGGTGGCGAAGGCGGCTCTCTGGCAACAACCTGACGCTGAGGAGCGAAAGCGTG  
GGGAG

>ASV:790:Genus:Ruminococcaceae\_UCG-014  
TACGTAGGGAGCAAGCGTTATCCGGATTTATTGGGTGTAAAGGGTGCCTAGACGGGAGAACAAAGTTAGTTGTGAAAGCCC  
TCGGCTTAACCTGAGGAACTGCACTTCAAACCTGAAATCTAGAGTGCAGGAGAGGAAAGCGGAATTCCTAGTGTAGCGGTG  
AAATGCGTAGATATTAGGAGGAACACCACTGGCGAAGGCGGCTTCTGGACTGTAACCTGACGTTGAGGCACGAAAGTGTG  
GGGAG

>ASV:791:Species:paraputrificum  
TACGTAGGTGGCAAGCGTTGTCCGGATTAATGGGCGTAAAGGGAGCGTAGGCGGATTTTTAAGTGGGATGTGAAATACC  
CGGGCTCAACCTGGGTGCTGCATTTCAAACCTGAAATCTAGAGTGCAGGAGGGAAAGTGAATTCCTAGTGTAGCGGTG  
AAATGCGTAGAGATTAGGAGGAACACCACTGGCGAAGGCGACTTTCTGGACTGTAACCTGACGCTGAGGCTCGAAAGCGTG  
GGGAG

>ASV:792:Phylum:Firmicutes  
TACGTAGGGGGCAAGCGTTGTCCGGAATTAATGGGCGTAAAGGGTGCCTAGGCGGCGGATCAAGTCAGGTGTGAAAGACC  
CGTGTCTAACCTGAGGCTGCACTTCAAACCTGAACTGGTTGGCTTGTAGTATGGGAGAGGCAAGCGGAATTCCTAGTGTAGCGGTG  
AAATGCGTAGAGATCGGGAGGAACACCACTGGCGAAGGCGGCTTGTGGACCAAACCTGACGCTGAGGCACGAAAGCGTG  
GGTAG

>ASV:793:Genus:Family\_XIII\_AD3011\_group  
TACGTAGGGGGCGAGCGTTATCCGGAATTAATGGGCGTAAAGGGTGCCTAGGCGGTTTTTTAAGCGCGGGGTGAAAGGCA  
ATGGCTTAACCTAGTGTAGCCCTGCGAACTGGGAGACTTGTAGTGCAGGAGAGGAAAGCGGAATTCCTAGTGTAGCGGTGA  
AATGCGTAGATATTAGGAGGAACACCACTGGCGAAGGCGGCTTCTGGACTGTAACCTGACGCTGAGGAACGAAAGTGTGG  
GGAGC

>ASV:794:Genus:Parabacteroides  
TACGGAGGATCCGAGCGTTATCCGGATTTATTGGGTTTAAAGGGTGCCTAGGCGGCCTTTTAAAGTCAGCGGTGAAAGTCT  
GTGGCTCAACCATAGAAATTGCCGTTGAAACTGGGGGCTTGTAGTATGTTTGTAGGAGGCGGAAATGCGTGGTGTAGCGGTG  
AAATGCTTAGATATCACGAAGAACTCCGATTGCGAAGGCGAGTCACTAGACTGTCACTGACACTGATGCTCGAAAGTGTG  
GGTAT

>ASV:795:Genus:Fusobacterium  
TACGTATGTCGCAAGCGTTATCCGGAATTAATGGGCGTAAAGCGCGTCTAGGCGGTTTGGTAAAGTCTGATGTGAAATGC  
GGGGCTCAACTCTGTATTGCCGTTGAAACTGTCAAACCTAGAGTACTGGAGAGGTGGGCGGAACTACAAGTGTAGAGGTGA  
AATTCGTAGATATTGTAGGAATGCCGATGGGAAGCAGCCACTGGACAGATACTGACGCTAAAGCGCGAAAGCGGTGG  
GTAGC

>ASV:796:Genus:Angelakisella  
TACGTAGGGAGCGAGCGTTGTCCGGAATTAATGGGTTTAAAGGGAGCGTAGGCGGGAAGGCAAGTTGGATGTGAAAACCTG  
TGGGCTCAACCTACAGACTGCATTTCAAACCTGTTTTCTTGTAGTGAAGTAGAGGCAAGCGGAATTCCTAGTGTAGCGGTG  
AAATGCGTAGATATTAGGAGGAACACCACTGGCGAAGGCGGCTTGTGGGCTTTTACTGACGCTGAGGCTCGAAAGTGTG  
GGGAG

>ASV:797:Genus:Prevotella\_9  
TACGGAAGGTCGGGCGTTATCCGGATTTATTGGGTTTAAAGGGAGCGTAGGCGGAGATTAAGCGTGTGTGAAATGTA  
GATGCTCAACATCTGAAGTGCAGCGCAACTGGTTTCTTGTAGTACGCACAAAGTGGGCGGAAATTCGTGGTGTAGCGGTG  
AAATGCTTAGATATCACGAAGAACTCCGATTGCGAAGGCGAGTCACTGGAGCGCAACTGACGCTGAAGCTCGAAGGTGCG  
GGTAT

>ASV:798:Genus:Ruminococcaceae\_UCG-002  
TACGTAGGTGGCAAGCGTTGTCCGGAATTAATGGGTTTAAAGGGCGTGTAGCAGGCTCGGCAAGTCAAGTGTGAAATCCA  
CGGGCTTAACCTCGTGAAGTGCATTTGAAACTGTTGATCTTGTAGTATCGGAGAGGCAATCGGAATTCCTAGTGTAGCGGTG  
AAATGCGTAGATATTAGGAGGAACACCACTGGCGAAGGCGGATTGCTGGACGACAACCTGACGCTGAGGCGCGAAAGCGTG  
GGGAG

>ASV:799:Family:Muribaculaceae  
TACGGAGGATGCGAGCGTTATCCGGATTTATTGGGTTTAAAGGGTGCCTAGGCGGACTGTCAAGTCAGCGGTGAAATACG  
GGGGCTCAACCTCCGCCCGGCTTGAAGTGCAGGCTTGTAGTGGGCGAGAAGTATGCGGAATGCGTGGTGTAGCGGTGA  
AATGCATAGATATCACGAGAAGTCCGATTGCGAAGGCGAGCATAACCGCGCCCAACTGACGCTGAAGCACGAAAGCGGTG  
GTATC

>ASV:800:Genus:Ruminococcaceae\_UCG-010  
TACGTAGGTGGCAGCGTTATCCGGAATTAATGGGTTTAAAGGGTGTGTAGGCGGACTTCAAGTCAAGTGTGAAATTCG  
CGGGCTCAACCCGCAACCTGCATTTGAAACTGAGGTTCTTGTAGAGTGCAGAGGTAATGGAATTCCTAGTGTAGCGGTG

AAATGCGTAGATATCGGGAGGAACACCAGTGGCGAAGGCGATTTACTGGACGACAACGACGCTGAGACACGAAAGCGTG  
GGGAG  
>ASV:801:Order:Clostridiales  
TACGTAGGGGCGAGCGTTATCCGGAATTACTGGGTGTAAGGGTGCCTAGGCGGCAACGTAAGTCTGTTGTGAAAGGTG  
ATGGCTTAACCAGCGAAGTGAATGAAACTGCGGAGCTAGAGTGCAGGAGAGGAAAGCGGAATTCCTAGTGTAGCGGTG  
AAATGCGTAGATATTAGGAAGAACACCAGTGGCGAAGGCGGCTTTCTGGACTGCAACTGACGCTGAGGCACGAAAGCGTG  
GGGAG  
>ASV:802:Genus:Roseburia  
TACGTATGGTCAAGCGTTATCCGGATTTACTGGGTGTAAGGGAGCGCAGGCGGTACGGCAAGTCTGATGTGAAAGCCC  
GGGGCTCAACTCCGGTACTGCATTGAAACTGTCGGACTAGAGTGTGCGAGGGGTAAGTGAATTCCTAGTGTAGCGGTG  
AAATGCGTAGATATTAGGAGGAACACCAGTGGCGAAGGCGGCTTTACTGGACGATTACTGACGCTGAGGCTCGAAAGCGTG  
GGGAG  
>ASV:803:Genus:Faecalibacterium  
AACGTAGGTCACAAGCGTTGTCCGGAATTACTGGGTGTAAGGGAGCGCAGGCGGGAAGACAAGTTGGGAGTGAAATCCA  
TGGGCTCAACCCATGAACTGCTTTCAAAGTGTCTTTCTTGGAGTAGTGCAGAGGTAGCGGGAATTCCTAGTGTAGCGGTG  
GAATGCGTAGATATCGGGAGGAACACCAGTGGCGAAGGCGGCTTTACTGGGCACCAACTGACGCTGAGGCTCGAAAGTGTG  
GGTAG  
>ASV:804:Genus:Parabacteroides  
TACGGAGGATCCGAGCGTTATCCGGATTTATTGGGTTAAAGGGTGCCTAGGCGGCTTTTAAAGTCAAGCGGTGAAAGTCT  
GTGGCTCAACCATAGAATTGCCGTTGAAACTGGGGGCTTGGATGTTTGGAGCAGGCGGAATGCGTGGTGTAGCGGTG  
AAATGCTTAGATATCACGAGAACCCGATTGCGAAGGCAGCCTGCTAAGCTGCAACTGACATTGAGGCTCGAAAGTGTG  
GGTAT  
>ASV:805:Genus:Lachnoclostridium\_5  
TACGTAGGGGCGAAGCGTTATCCGGATTTACTGGGTGTAAGGGAGCGTAGACGGCGACGCAAGTCTGGAGTGAAAGCCC  
GGGGCCCAACCCCGGACTGCTTTGAAACTGTGTTGCTGGAGTGCAGGAGAGGTAAGTGAATTCCTAGTGTAGCGGTG  
AAATGCGTAGATATTAGGAGGAACACCAGTGGCGAAGGCGGCTTTACTGGACTGTAAGTACGCTTGGGCTCGAAAGCGTG  
GGGAG  
>ASV:806:Genus:Prevotella\_2  
TACGGAAGGTCGGGCGTTATCCGGATTTATTGGGTTAAAGGGAGCGTAGGCGCTGTTAAGCGTGTGTGAAATGTC  
GGGGCTCAACCTGGGCTTGCAGCGCAACTGGCAGACTTGGTGTACAGGAAGTAGCGGGAATTCCTGCTGTAGCGGTG  
AAATGCTTAGATATGACGAAGAACCAGATTGCGAAGGCAGCCTGCTGTAGTGAAGTACGCTGAGGCTCGAAAGCGTG  
GGTAT  
>ASV:807:Genus:Family\_XIII\_AD3011\_group  
TACGTAGGGGCGAAGCGTTATCCGGAATTATTGGGCGTAAAGAGTACGTAGGTGGTTTTCTAAGCACGGGTTTAAAGGCA  
ATGGCTTAACCTATTGTTCCGCTTGTGAACTGGGAGACTTGGTACAGGAGAGGAAAGCGGAATTCCTAGTGTAGCGGTG  
AATGCGTAGATATTAGGAGGAACACCAGTGGCGAAGGCGGCTTTCTGGACTGAAACTGACACTGAGGTACGAAAGCGTG  
GGAGC  
>ASV:808:Genus:Ruminiclostridium\_6  
TACGTAGGTGGCGAGTGTGTCGGGAATTACTGGGTGTAAGGGAGTGTAGGCGGGAAGGCAAGTCAAGTGAATTA  
TGGGCTTAACCATAACCTGCTTTTGAAGTGTCTTTCTTGGAGTGGAGGAGGCAAGCGGAATTCCTAGTGTAGCGGTG  
AAATGCGTAGATATTAGGAGGAACACCAGTGGCGAAGGCGGCTTTGCTGGGCTTTACTGACGCTGAGGCTCGAAAGCGTG  
GGGAG  
>ASV:809:Genus:Ruminococcaceae\_UCG-014  
TACGTAGGGAGCGAGCGTTATCCGGATTTATTGGGTGTAAGGGTGCCTAGACGGGATAGCAAGTTAGCTGTGAAATCCC  
TCGGCTTAACCTGAGGAACTGCAACTAAAAGTACTATTTCTTGGAGTGTGAGAGGAAAGTGAATTCCTAGTGTAGCGGTG  
AAATGCGTAGATATTAGGAGGAACACCAGTGGCGAAGGCGACTTTCTGGACAGTAACTGACGTTGAGGCACGAAAGTGTG  
GGGAG  
>ASV:810:Genus:Ruminococcaceae\_UCG-013  
TACGTAGGTGGCGAGCGTTGTCGGGAATTACTGGGTGTAAGGGCGCGTAGACGGGTAGATAAGTTAGATGTGAAATACC  
GGGGCTTAACCTCCGGGCTGCATTTAAAAGTGTCTTTCTTGGAGTGCAGGAGAGGGAAGCGGAATTCCTAGTGTAGCGGTG  
AAATGCGTAGATATTAGGAGGAACACCAGTGGCGAAGGCGGCTTTCTGGACTGTAAGTACGCTTGGGCGGCAAGGCGTG  
GGTAG  
>ASV:811:Genus:Butyrivimonas  
TACGGGGATGCGAGCGTTATCCGGATTTATTGGGTTAAAGGGCGCGTAGGCGGGACGGCAAGTCAAGCGGTAAAAGACT  
GCAGCTAAACTGTAGCACCGGTTGAAACTGTGACCTGGAGACGAGAGGAGGCGGAACAAGTGAAGTACGCGGTGA  
AATGCATAGATATCACTTGGAAACCCGATAGCGAAGGCGACTTTCCAGGCTCGATCTGACGCTGATGCGCGAGAGCGGTG  
GTAGC  
>ASV:812:Species:timonense  
TACGTAGGGGCGAGCGTTATCCGGAATTATTGGGCGTAAAGGGCTTGTAGGTGGCTGGTTGCGTCTGTGCTGAAAGCTC  
ATGGCTTAACCTGTTGGTTTGCAGTGGGTACGGGCTGGCTTGGTGTAGTGCAGTGGGAGACTGGAATTCCTGGTGTAGCGGTG  
GAATGCGCAGATATCAGGAGGAATACCGGTGGCGAAGGCGGCTCTCTGGGCTGTTACTGACGCTGAGGAGCGAAAGCGTG  
GGGAG  
>ASV:813:Order:Clostridiales  
TACGTAGGGGCGAGCGTTGTCGGGAATTACTGGGCGTAAAGGGCGCGTAGGCGGCCGATAAGTTAGATGTGAAATCCC  
CGGGCTCAACCTGGGTGTTGCATTTAAAAGTGTCTGGCTTGGTGTAGTGCAGGAGAGGAAAGCGGAATTCCTAGTGTAGCGGTG  
AAATGCGTAGATATTAGGAGGAACATCAGTGGCGAAGGCGGCTTTCTGGACTGTAAGTACGCTGAGGCGCGAGAGCGTG  
GGGAG  
>ASV:814:Genus:Dorea

TACGTAGGGGGCAAGCGTTATCCGGATTTACTGGGTGTAAAGGGAGCGTAGACGGCATTGCAAGCCAGATGTGAAAAGCCC  
GGGGCTCAACCCCGGACTGCATTTGGAAGCTAGAGCTAGAGTGTCCGGAGAGGCAAGTGAATTCCTAGTGTAGCGGTG  
AAATGCGTAGATATTAGGAGGAACACCAGTGGCGAAGGCGGCTTCTGGACGATGACTGACGTTGAGGCTCGAAAGCGTG  
GGGAG  
>ASV:815:Genus:Fusicatenibacter  
TACGTAGGGGGCAAGCGTTATCCGGATTTACTGGGTGTAAAGGGAGCGTAGACGGCAAGGCAAGTCTGATGTGAAAACCC  
AGGGCTTAACCTGGGACTGCATTTGGAAGCTGTCTGGCTTGAAGTGCAGGAGAGGTAAGCGGAATTCCTAGTGTAGCGGTG  
AAATGCGTAGATATTAGGAGGAACACCAGTGGCGAAGGCGGCTTACTGGACGTAAGTACGTTGAGGCTCGAAAGCGTG  
GGGAG  
>ASV:816:Genus:Ruminococcus\_1  
TACGTAGGGAGCGAGCGTTGTCCGGAATTACTGGGTGTAAAGGGAGCGTAGGCGGGACGGTAAGTCAAGTGTGAAATATA  
CGTGCTCAACATGTAGACTGCATTTGAAAGCTGTCTTCTTGAAGTGAAGTAGAGGTAAGCGGAATTCCTAGTGTAGCGGTG  
AAATGCGTAGATATTAGGAGGAACATCGGTGGCGAAGGCGGCTTACTGGGCTTTTACTGACGCTGAGGCTCGAAAGCGTG  
GGGAG  
>ASV:817:Genus:Bacteroides  
TACGGAGGATGCGAGCGTTATCCGGATTTATTGGGTTTAAAGGGAGCGTAGATGGGCTTTTAAAGTCAAGTGTGAAATTC  
GCGGCTCAACCGTAGGACTGCAGTTGAAAGCTGGAGCCTTGAAGTGCAGTTGAGGTGCATGGAATTCGTGGTGTAGCGGTG  
AAATGCTTAGATATCACGAAGAACTCCGATTGCGAAGGCAGTGCACCAAGCTGTAAGTACGATTGATGCTCGAAAGTGTG  
GGTAT  
>ASV:818:Family:Lachnospiraceae  
TACGTAGGGGGCAAGCGTTATCCGGATTTACTGGGTGTAAAGGGAGCGTAGACGGCATGGCAAGCCAGATGTGAAAAGCCC  
GGGGCTCAACCCCGGACTGCATTTGGAAGTCCAGGCTAGAGTGTCCGGAGAGGAAAGCGGAATTCCTAGTGTAGCGGTG  
AAATGCGTAGATATTAGGAGGAACACCAGTGGCGAAGGCGGCTTCTGGACGATGACTGACGTTGAGGCTCGAAAGCGTG  
GGGAG  
>ASV:819:Family:Lachnospiraceae  
TACGTATGGGGCAAGCGTTATCCGGATTTACTGGGTGTAAAGGGAGCGTAGGCGGTACGGCAAGTCAGAAGTAAAAGCCT  
GGGGCTCAACCCGGAAGTGTCTTTGAAAGTGTGCAACTAGAGTGTCCGGAGGGTAAGCGGAATTCCTAGTGTAGCGGTG  
AAATGCGTAGATATTAGGAGGAACACCAGTGGCGAAGGCGGCTTACTGGACGACCACTGACGCTGAGGCTCGAAAGCGTG  
GGGAG  
>ASV:820:Order:Mollicutes\_RF39  
TACGTAGGGGGCGAGCGTTATCCGGATTTATTGGGCGTAAAGCGTGTGTAGGCGGTTTGTAAAGTTAAGATTAAGCCT  
GGGGCTCAACCCAGTTCGTCTTAAAAACTGGCAGACTAGAGTGCAGTGCAGGAGGCAACCGGAATTCCTAGTGTAGCGGTG  
AAATGCGTAGATATTAGGAGGAACACCAGTGGCGAAGGCGGTTTCTGGCCGTTACTGACGCTGAGGACGAAAGCGTGG  
GGAGC  
>ASV:821:Genus:Dorea  
TACGTAGGGGGCAAGCGTTATCCGGATTTACTGGGTGTAAAGGGAGCGTAGACGGCACGGCAAGCCAGATGTGAAAAGCCC  
GGGGCTCAACCCCGGACTGCATTTGGAAGTGTGATACTCGAGTGTCCGGAGAGGTAAGCGGAATTCCTAGTGTAGCGGTG  
AAATGCGTAGATATTAGGAGGAACACCAGTGGCGAAGGCGGCTTCTGGACGATGACTGACGTTGAGGCTCGAAAGCGTG  
GGGAG  
>ASV:822:Genus:Blautia  
TACGTAGGGGGCAAGCGTTATCCGGATTTACTGGGTGTAAAGGGAGCGTAGACGGTGTGCAAGTCTGATGTGAAAAGGCG  
GGGGCTCAACCCCGGACTGCATTTGGAAGTGTGATACTCGAGTGTCCGGAGAGGTAAGCGGAATTCCTAGTGTAGCGGTG  
AAATGCGTAGATATTAGGAGGAACACCAGTGGCGAAGGCGGCTTACTGGACGTAAGTACGTTGAGGCTCGAAAGCGTG  
GGGAG  
>ASV:823:Genus:Erysipelatoclostridium  
TACGTAGGTGGCAAGCGTTATCCGGAATTTATTGGGCGTAAAGAGGGAGCAGGCGGCGGCAAGGCTGTGTGGTAAAAGACT  
GAAGCTTAACCTCAGTAAGCCATAGAAACCGGGCGGCTAGAGTGCAGGAGAGGATCGTGGAATTCATGTGTAGCGGTG  
AAATGCGTAGATATTAGGAGGAACACCAGTGGCGAAGGCGGCTTCTGGCCTGTAAGTACGCTCATTCCGAAAGCGTGG  
GGAGC  
>ASV:824:Genus:Intestinimonas  
TACGTAGGTGGCAAGCGTTATCCGGATTTACTGGGTGTAAAGGGCGTGTAGGCGGAAAGCAAGTCAAGCGGTGAAAAGCTC  
GGGGCTCAACCCGAGCCTGCGTTTTGAAAGTGTCTTCTTGAAGTGTGGAGAGGCAAGCGGAATTCCTGTGTAGCGGTG  
AAATGCGTAGATATTAGGAGGAACACCAGTGGCGAAGGCGGCTTCTGGACATTAAGTACGCTGAGGCGGAAAGCGTG  
GGGAG  
>ASV:825:Family:Lachnospiraceae  
TACGTAGGGGGCAAGCGTTATCCGGATTTACTGGGTGTAAAGGGTGCCTAGGTGGCAAGGCAAGTCAAGTGTGAAAAGCCC  
GGGGCTCAACCCCGGACTGCATTTGAAAGTGTCTAGCTAGAGTGCAGGAGAGGTAAGTGAATTCCTAGTGTAGCGGTG  
AAATGCGTAGATATTAGGAGGAACACCAGTGGCGAAGGCGGCTTACTGGACTGTAAGTACGCTGAGGACGAAAGCGTG  
GGGAG  
>ASV:826:Family:Lachnospiraceae  
TACGTATGGAGCAAGCGTTATCCGGATTTACTGGGTGTAAAGGGTGCCTAGGTGGCAGTGCAGTCAAGTCAAGTGTGAAAAGCT  
GGGGCTCAACCCCGGACTGCATTTGAAAGTGCATAGCTAGAGTACAGGAGAGGCAAGCGGAATTCCTAGTGTAGCGGTG  
AAATGCGTAGATATTAGGAGGAACACCAGTGGCGAAGGCGGCTTCTGGACTGTTACTGACACTGAGGACGAAAGCGTG  
GGGAG  
>ASV:827:Family:Lachnospiraceae  
TACGTAGGGGGCAAGCGTTATCCGGATTTACTGGGTGTAAAGGGAGCGTAGGCGGCAAGTCAAGTCAAGTGTGAAAAGCCC  
GGGGCTCAACCCCGGACTGCATTTGAAAGTGTAAAGGCTAGATTGCCGGAGAGGTAAGCGGAATTCCTAGTGTAGCGGTG  
AAATGCGTAGATATTAGGAGGAACACCAGTGGCGAAGGCGGCTTACTGGACGTAAGTACGCTGAGGCTCGAAAGCGTG

GGGAG  
>ASV:828:Genus:Bacteroides  
TACGGAGGATCCGAGCGTTATCCGGATTTATTGGGTTTAAAGGGAGCGTAGGTGGACATGTAAGTCAGTTGTGAAAATTT  
GCGGCTCAACCGTAAAATTGCAGTTGATACTGTGTCTTGAGTACAGTAGAGGTGGCGGAATTCGTGGTGTAGCGGTG  
AAATGCTTAGATATCACGAAGAAGTCCGATTGCGAAGGCAGCTACTGGACTGCTACTGACACTGAGGCTCGAAAGTGTG  
GGTAT  
>ASV:829:Genus:Aminobacter  
TACGAAGGGGGCTAGCGTTTGTTCGGAATTACTGGGCGTAAAGCGCACGTAGGCGGATCTTAAGTTAGGGGTGAAATCCC  
AGGGCTCAACCTGGAAGTGCCTCTAATACTGGGTATCTTGAGTTTCGAGAGAGGTGAGTGGAATTCGAGTGTAGAGGTG  
AAATTCGTAGATATTCGAGGAACACCAGTGGCGAAGGCGGCTACTGGCTCGATACTGACGCTGAGGTGCGAAAGCGTG  
GGGAG  
>ASV:830:Genus:Blautia  
TACGTAGGGGGCAAGCGTTATCCGGATTTACTGGGTGTAAGGGAGCGTAGACGGAGCAGCAAGTCTGATGTGAAAGACG  
GGGGCTCAACCCCGGACTGCATTGGAAGTGTGATCTTGAGTACCGGAGAGGTAAAGCGGAATTCCTAGTGTAGCGGTG  
AAATGCGTAGATATTAGGAGGAACACCAGTGGCGAAGGCGGCTACTGGACGGTAACTGACGTTGAGGCTCGAAAGCGTG  
GGGAG  
>ASV:831:Genus:Blautia  
TACGTAGGGGGCAAGCGTTATCCGGATTTACTGGGTGTAAGGGAGCGTAGACGGTGTGGCAAGTCTGATGTGAAAGGCA  
TGGGCTCAACCTGTGGACTGCATTGGAAGTGTGATCTTGAGTACCGGAGGGGTAAGCGGAATTCCTAGTGTAGCGGTG  
AAATGCGTAGATATTAGGAGGAACACCAGTGGCGAAGGCGGCTACTGGACGGTAACTGACGTTGAGGCTCGAAAGCGTG  
GGGAG  
>ASV:832:Genus:Parabacteroides  
TACGGAGGATCCGAGCGTTATCCGGATTTATTGGGTTTAAAGGGTGCCTAGGCGGCCTTTTAAAGTACGCGGTGAAAGTCT  
GTGGCTCAACCATAGAATTGCCGTTGAAACTGGGAGGCTTGAAGTATGTTTGAAGGAGGCGGAATGCGTGGTGTAGCGGTG  
AAATGCTTAGATATCACGAAGAAGTCCGATTGCGAAGGCAGCTTCTGGACTGTAACGACGCTGATGCTCGAAAGTGTG  
GGTAT  
>ASV:833:Genus:Ruminococcaceae\_UCG-005  
TACGTAGGTGGCAAGCGTTTGTCCGGATTTACTGGGTGTAAGGGCGTGTAGGCGGAGCAGCAAGTCAAGTGAATCTC  
TGGGCTCAACCCAGAACTGCTTTTGAAGTGTGCCCTTGAGTATCGGAGAGGCGGCGGAATTCCTAGTGTAGCGGTG  
AAATGCGTAGATATTAGGAGGAACACCAGTGGCGAAGGCGGCTGCTGGACGACAACGACGCTGAGGCGCGAAAGCGTG  
GGGAG  
>ASV:834:Genus:Leadbetterella  
TACGGAGGGTCAAGCGTTATCCGGATTTATTGGGTTTAAAGGGTGCCTAGGCGGCCTTATAAGTCCGTTGGTTAAAGGTG  
GTCGCTTAACGATTTACATGCCATCGATACTGTAGGCTTGAAGTATTTGGAGGTAGCTAGAATTCCTGTGTAGCGGT  
GAAATGCATAGATACGGGGAGGAATACCGATTGCGAAGGCATGTTACTACGAATTAAGTACGCTGAGGCGACGAAAGCGT  
GGGGA  
>ASV:835:Genus:Blautia  
TACGTAGGGGGCAAGCGTTATCCGGATTTACTGGGTGTAAGGGAGCGTAGACGGAGCAGCAAGTCTGATGTGAAAGGCA  
GGGGCTCAACCCCGGACTGCATTGGAAGTGTGATCTTGAGTACCGGAGAGGTAAAGCGGAATTCCTAGTGTAGCGGTG  
AAATGCGTAGATATTAGGAGGAACACCAGTGGCGAAGGCGGCTACTGGACGGTAACTGACGTTGAGGCTCGAAAGCGTG  
GGGAG  
>ASV:836:Genus:Family\_XIII\_AD3011\_group  
TACGTAGGGGGCAAGCGTTATCCGGAATTTATTGGGCGTAAAGAGTGCCTAGGTGGTTACCTAAGCAGGGGGTAAAGGCA  
CTGGCTTAACCAATGTGAGCCCTGAACTGGTACCTTGAGTGCAGGAGAGGAAAGCGGAATTCCTAGTGTAGCGGTGA  
AATGCGTAGATATTAGGAGGAACACCAGTGGCGAAGGCGGCTTCTGGACTGTTACTGACACTGAGGCGACGAAAGTGTG  
GGAGC  
>ASV:837:Family:Ruminococcaceae  
TACGTAGGTGGCAAGCGTTGTCCGGAATTTACTGGGTGTAAGGGAGCGTAGGCGGGATGCAAGTTGAATGTTAAACTA  
TCGGCTCAACTGATAGTCGCGTTCAAAGTGAAGTCTTGAGTGAAGTAGAGGTAGGCGGAATTCCTAGTGTAGCGGTGA  
AATGCGTAGATATTAGGAGGAACACCAGTGGCGAAGGCGGCTACTGGGCTTTACTGACGCTGAGGCTCGAAAGCATG  
GGAGC  
>ASV:838:Species:creatinolyticus  
TACGTAGGGGGCAAGCGTTATCCGGAATTTATTGGGCGTAAAGAGCTCGTAGGCGGTTTGTGCGCTGTCGCGTGAAGTCC  
GAGGCTCAACCTCGGATCTGCGGTGGTACGGGCAGACTAGAGTGTAGTGGGAGACTGGAATTCCTGGTGTAGCGGTG  
AAATGCGCAGATATCAGGAGGAACACCAGTGGCGAAGGCGGCTCTCTGGGCTTTACTGACGCTGAGGAGCGAAAGCATG  
GGGAG  
>ASV:839:Family:Erysipelotrichaceae  
TACGTAGGTGGCAAGCGTTATCCGGAATCATTGGGCGTAAAGGGTGCCTAGGTGGCGGATTAAGTCCGTAGTAAAGGCA  
TTGGCTCAACCAATGTAAGCTATGGAAGTGTGCGCTGGAGTGCAGAAAGGGCGATGGAATTCCTAGTGTAGCGGTAA  
AATGCGTAGATATTAGGAGGAACACCAGTGGCGAAGGCGGCTGCGCTGGTCTGCAACTGACACTGAGGCGACGAAAGCGTG  
GGAGC  
>ASV:840:Genus:Christensenellaceae\_R-7\_group  
TACGTAGGGGGCAAGCGTTGTCCGGAATGATTGGGCGTAAAGGGCGTGTAGGCGGCGATTTAAGTCTGGAGTGAAGTCC  
TGCTTTTAAAGTGGGAATGCTTTGGATACTGGATGGCTAGAGTGCAGGAGAGGTTAGTGGAAATTCAGTGTAGCGGTG  
AAATGCGTAGAGATTGGGAGGAACACCAGTGGCGAAGGCGACTAACTGGACTGTAACGACGCTGAGGCGCGAAAGTGTG  
GGGAG  
>ASV:841:Genus:Lachnoclostridium  
TACGTAGGGGGCAAGCGTTATCCGGAATTTACTGGGTGTAAGGGAGCGTAGACGGCGAAGCAAGTCTGAAGTGAAGCC

AGGGCTCAACCCTGGGACTGCTTTGAAACTGTTTTGCTAGAGTGTCGGAGAGGTAAGTGAATTCCTAGTGTAGCGGTG  
AAATGCGTAGATATTAGGAGGAACACCAGCGGCGAAGGCGGCTTACTGGACGATAACTGACGTTGAGGCTCGAAAGCGTG  
GGGAG  
>ASV:842:Genus:Dorea  
TACGTAGGGGGCAAGCGTTATCCGGATTTACTGGGTGTAAGGGGAGCGTAGACGGCTGTGCAAGTCTGAAGTGAAGGCA  
TGGGCTCAACTTGTGGACTGCTTTGAAACTGTGCAGCTAGAGTGTCGGAGAGGTAAGTGAATTCCTAGTGTAGCGGTG  
AAATGCGTAGATATTAGGAGGAACACCAGTGGCGAAGGCGGCTTACTGGACGATGACTGACGTTGAGGCTCGAAAGCGTG  
GGGAG  
>ASV:843:Genus:Bacteroides  
TACGGAGGATGCGAGCGTTATCCGGATTTATTAGGTTAAAGGGGAGCGCAGACGGGTCGTTAAGTCAGCTGTGAAAGTTT  
GGGGCTCAACCTTAAAATTGCAGTTGATACTGGCGTCTTGTAGTGCGGTTGAGGTGTGCGGAATTCGTGGTGTAGCGGTG  
AAATGCTTAGATATCACGAAGAACCAGTGGCGAAGGCGACACTAATCCGTAACGACGTTATGCTCGAAAGTGTG  
GGTAT  
>ASV:844:Family:Lachnospiraceae  
TACGTATGGAGCAAGCGTTATCCGGATTTACTGGGTGTAAGGGTGCCTAGGTGGCAGTGAAGTCAAGTGTGAAAGGTC  
GGGGCTCAACCCCGGAGCTGCATTTGAAACTGCTCGGCTAGAGTACAGGAGAGGCGAGCGGAATTCCTAGTGTAGCGGTG  
AAATGCGTAGATATTAGGAGGAACACCAGTGGCGAAGGCGGCTGCTGGACTGTTACTGACACTGAGGCACGAAAGCGTG  
GGGAG  
>ASV:845:Genus:Ruminococcaceae\_UCG-014  
TACGTAGGGAGCAAGCGTTATCCGGAATTATTGGGTGTAAGGGTGCCTAGACGGGAAAGCAAGTTAGTTGTGAAATCCC  
TCGGCTTAACTGAGGAACTGCAACTAAAACGTTTTTCTTGTAGTGCTGGAGAGGAAAGTGAATTCCTAGTGTAGCGGTG  
AAATGCGTAGATATTAGGAGGAACACCAGTGGCGAAGGCGACTTTCTGGACAGTAACGACGTTGAGGCACGAAAGTGTG  
GGGAG  
>ASV:846:Family:Christensenellaceae  
TACGTAGGGAGCAAGCGTTGTCCGGAATTACTGGGCGTAAAGGGTGCCTAGGCGGGCAGTTAGTCAAGAAGTGAATATC  
GGGGCTTAAACCCGGGGCTGCTTCTGATACTGCTGTGCTCGAGTGCAGGAGAGGTAAGTGAATTCCTAGTGTAGCGGTG  
AAATGCGTAGATATTAGGAGGAACACCAGTGGCGAAGGCGACTTACTGGACTGTAACGACGCTGAGGCACGAAAGCGTG  
GGTAG  
>ASV:847:Genus:Ruminiclostridium\_5  
TACGTAGGGAGCGAGCGTTGTCCGGATTTACTGGGTGTAAGGGTGCCTAGGCGGCAGAGCAAGTCAAGCGTGAAGGCA  
TGGGCTTAAACCCATGAAGTGCCTTGAACGTTTTTCTTGTAGTGAAGTAGAGGCGAGCGGAATTCCTAGTGTAGCGGTG  
AAATGCGTAGATATTAGGAGGAACACCAGTGGCGAAGGCGGCTGCTGGGCTTAACTGACGCTGAGGCACGAAAGCATG  
GGTAG  
>ASV:848:Genus:Ruminococcaceae\_UCG-013  
TACGTAGGTGCAAGCGTTGTCCGGATTTACTGGGTGTAAGGGGCGTGTAGGCGGGTAAACAAGTCAAGTGTGAAATACC  
GGGGCTCAACTCCGGGGCTGCATTTGAAACTGTAGATCTTGTAGTGTGCGAGAGGAAAGCGGAATTCCTAGTGTAGCGGTG  
AAATGCGTAGATATTAGGAGGAACACCAGTGGCGAAGGCGGCTTCTGGACGATAACTGACGCTGAGGCACGAAAGCGTG  
GGGAG  
>ASV:849:Genus:Tumebacillus  
TACGTAGGGGGCAAGCGTTGTCCGGATTTACTGGGCGTAAAGCGCGCAGGCGGTGATGTAAGTCTGAGGTGAAAACCC  
GAAGTCAACTTCGGGACTGCCTTGGATACTGCGTCACTTGAAGGATAGGAGAGGCAAGGGGAATTCACGCTGTAGCGGTG  
AAATGCGTAGATATTGGAGGAACACCTGTGGCGAAGGCGCCTTGTGGCCTATTTCTGACGCTGAGGCACGAAAGCGTG  
GGGAG  
>ASV:850:Genus:Ruminiclostridium\_9  
TACGTAGGGAGCAAGCGTTATCCGGATTTACTGGGTGTAAGGGGCGTGTAGGCGGGACTGCAAGTCAAGTGTGAAAACCTA  
TGGGCTCAACTCATAGCCTGCATTTGAAACTGTAGTCTTGTAGTGTGCGAGAGGCAATGGAACCTCCTAGTGTAGCGGTG  
AAATGCGTAGATATTAGGAAGAACACCAGTGGCGAAGGCGGCTTGTGGACAGTAACGACGCTGAGGCACGAAAGTGTG  
GGGAG  
>ASV:851:Genus:Faecalibacterium  
AACGTAGGTCAACAAGCGTTGTCCGGAATTACTGGGTGTAAGGGGAGCGCAGGTGGGAAGACAAGTTGGAAGTGAATCCA  
TGGGCTCAACCCATGAAGTGCCTTCAAACGTTTTTCTTGTAGTAGTGCAGAGGTAGGCGGAATTCCTAGTGTAGCGGTG  
GAATGCGTAGATATTGGAGGAACACCAGTGGCGAAGGCGGCTTACTGGGCACCAACTGACGCTGAGGCTCGAAAGTGTG  
GGTAG  
>ASV:852:Genus:Ruminococcaceae\_UCG-005  
TACGTAGGTGCAAGCGTTGTCCGGATTTACTGGGTGTAAGGGGCGTGTAGGCGGGACTGCAAGTCTGATGTGTAATCTG  
GTGGCTCAACCAAACTGCATTGAAACTGTAGTCTTGTAGTATCGGAGAGGCGAGCGGAATTCCTAGTGTAGCGGTG  
AAATGCGTAGATATTAGGAAGAACACCAGTGGCGAAGGCGGCTGCTGGACGACAACGACGCTGAGGCACGAAAGCGTG  
GGGAG  
>ASV:853:Species:caecimuris  
TACGTAGGGGGCAAGCGTTATCCGGATTTACTGGGTGTAAGGGGAGCGTAGGCGGTAGCGCAAGTCAAGAAGTGAAGGCC  
GGGGCTCAACCCCGGACTGCTTTGAAACTGCGTAACTGAGTGCAGGAGAGGTAAGTGAATTCCTAGTGTAGCGGTG  
GAAATGCGTAGATATTAGGAGGAACACCAGTGGCGAAGGCGGCTTACTGGACTGTAACGCTGAGGCTCGAAAGCGTG  
GGGA  
>ASV:854:Genus:Ruminococcus\_2  
TACGTAGGGAGCAAGCGTTGTCCGGATTTACTGGGTGTAAGGGTGCCTAGGCGGCTTTGCAAGTCAAGTGTGAAATCTA  
TGGGCTCAACCCATAAAGTGCATTTGAAACTGTAGAGCTTGTAGTGAAGTAGAGGCGAGCGGAATTCCTAGTGTAGCGGTG  
AAATGCGTAGATATTGGAGGAACACCAGTGGCGAAGGCGGCTGCTGGGCTTAACTGACGCTGAGGCACGAAAGCGTA  
GGTAG

>ASV:855:Species:taihuense  
TACGGAGGGTCAAGCGTTATCCGGATTTATTGGGTTAAAGGGTCCGTAGGCGGATCTGTAAGTCAGTGGTAAAATCTC  
ACAGCTTAACGTGAAACTGCCATTGATACTGCAGGCTTGGAGTAAAGTAGAAGTGGCTGGAATAAGTAGTGTAGCGGTG  
AAATGCATAGATATTACTTAGAACACCAATTGCGAAGGCAGGTCACATATGTTTTAACTGACGCTGATGGACGAAAGCGTG  
GGGAG

>ASV:856:Family:Clostridiales\_vadinBB60\_group  
TACGTAGGATGCAAGCGTTATCCGGAATGACTGGGCGTAAAGGGTGCCTAGGCGGTAATCAAGTTGGCAGCGTAATCC  
GGGGCTTAACCTCCGGAACACTGCCAAAACCTGGTGAAGTGTGTCAGGGTAAGTGAATTCCCTAGTGTAGCGGTG  
GAATGCGTAGATATTAGGAGGAACACCGAGGCGAAAGCGACTTACTGGGGCACAACCTGACGCTGAGGCACGAAAGCGTG  
GGGAG

>ASV:857:Genus:Ruminococcus\_1  
TACGTAGGGAGCGAGCGTTGTCCGGAATTACTGGGTGTAAGGGAGCGTAGGCGGGATCTTAAGTCAGGTGTGAAAAC  
TGTGGCTCAACCCATAGACTGCATTTGAAACTGAGGTTCTTGGTGAAGTAGAGGCAGCGGAATTCCTAGTGTAGCGGTG  
AAATGCGTAGATATTAGGAGGAACATCAGTGGCGAAGGCGGCTGCTGGGCTTTACTGACGCTGAGGCTCGAAAGCGTG  
GGGAG

>ASV:858:Genus:Christensenellaceae\_R-7\_group  
TACGTAGGGGCGAGCGTTGTCCGGAATGACTGGGCGTAAAGGGCGTATTAAGTGTGGAGTGAAGTCC  
TGCTTTAAGGTGGGAATTGCTTTGCAGACTGTTGGCTTGGTGCAGAGGGGAGAGTGAATTCCCTAGTGTAGCGGTG  
AAATGCGTAGAGATTGGGAGGAACACCGAGTGGCGAAGGCGACTTACTGGGCCGTAACGACGCTGAGGCAGAAAGCGTG  
GGGAG

>ASV:859:Species:australis/infantis/lactarius/mitis/oralis/peroris/sanguinis  
TACGTAGGTCCTCCGAGCGTTATCCGGATTTATTGGGCGTAAAGCGAGCGCAGGCGTTAGATAAGTCTGAAGTAAAGGCT  
GTGGCTTAACCATAGTACGCTTTGAAACTGTTAACTTGGTGAAGTAGAGGGGAGAGTGAATTCCATGTGTAGCGGTG  
AATGCGTAGATATTAGGAGGAACACCGGTGGCGAAAGCGGCTCTCTGGCTTGAACGACGCTGAGGCTCGAAAGCGTG  
GGAGC

>ASV:860:Family:Ruminococcaceae  
TACGTAGGGAGCGAGCGTTGTCCGGAATTACTGGGTGTAAGGGTGCCTAGGCGGCTAGACAAGTCAGGTGTGAAATAC  
CGAGCTCAACTCCGGGCTGCATTTGAAACTGTAGACTTGGTGTAGTGTGGAGAGGTAAGCGGAATTCCTAGTGTAGCGGT  
AAATGCGTAGATATTAGGAGGAACACCGAGTGGCGAAGGCGGCTTACTGGACATTAACGACGCTGAGGCACGAAAGCGTG  
GGGAG

>ASV:861:Genus:Alistipes  
TACGGAGGATCCAAGCGTTATCCGGATTTATTGGGTTAAAGGGTGCCTAGGCGGCGAGATTAAGTTAGAGTGAATTC  
GAGGCTCAACCTTGGCACTGCTCTGATACTGTTTCTAGCGAGTAGATGCTGTAGCGGAATGTGTGGTGTAGCGGTG  
AAATGCATAGAGACACAGAACACCGATTGCGAAGGCAGCTTACAATCTATATCGGACGCTGAGGCACGAAAGCGTG  
GGGAG

>ASV:862:Genus:Angelakisella  
TACGTAGGGAGCGAGCGTTGTCCGGAATTACTGGGTGTAAGGGAGCGTAGGCGGGAAGGCAAGTTGGATGTGAAAAC  
TGTGGCTTAACCGACAGACTGCATTTCAAACCTGTTTTCTTGGTGAAGTAGAGGCAAGCGGAATTCCTAGTGTAGCGGT  
AAATGCGTAGATATTAGGAGGAACACCGAGTGGCGAAGGCGGCTTCTGGGCTTTACTGACGCTGAGGCTCGAAAGTGTG  
GGGAG

>ASV:863:Genus:Lachnoclostridium  
TACGTAGGGGGCAAGCGTTATCCGGATTTACTGGGTGTAAGGGAGCGTAGACGGCATAGCAAGTCTGGAGTGAAGGCC  
GGGGCTCAACCCCGTACTGCTTTGAAACTGTTAAGCTAGAGTGTGGAGAGGTAAGTGAATTCCCTAGTGTAGCGGTG  
AAATGCGTAGATATTAGGAGGAACACCGAGTGGCGAAGGCGGCTTACTGGACAGTAACGACGTTGAGGCTCGAAAGCGTG  
GGGAG

>ASV:864:Genus:Faecalibacterium  
AACGTAGGTCAACAGCGTTGTCCGGAATTACTGGGTGTAAGGGAGCGCAGGCGGGAGAACAAAGTTGGAAGTGAATCCA  
TGGGCTCAACCCATGAAGTGTCTTTCAAACCTATTTTTCTTGGTGAAGTAGGAGGTAAGCGGAATTCCTAGTGTAGCGGT  
GAATGCGTAGATATTAGGAGGAACACCGAGTGGCGAAGGCGGCTTACTGGACAGTAACGACGTTGAGGCTCGAAAGTGTG  
GGTAG

>ASV:865:Genus:Ruminococcaceae\_NK4A214\_group  
TACGTAGGTGGCAAGCGTTATCCGGATTTACTGGGTGTAAGGGCGCGTAGGCGGGATGCAAGTCAGATGTGAAATCTA  
TGGGCTTAACCCATAAACTGCATTTGAAACTGTATCTCTTGGTGAAGTAGAGGTAAGCGGAATTCCTTGTGTAGCGGTG  
AAATGCGTAGATATAAGGAAGAACACCGAGTGGCGAAGGCGGCTTACTGGACAGTAACGACGTTGAGGCTCGAAAGCGTG  
GGGAG

>ASV:866:Family:Ruminococcaceae  
TACGTAGGTGGCAAGCGTTGTCCGGAATTACTGGGTGTAAGGGCGTGCAGCCGGGCGGCAAGTCAGATGTGAAATCCA  
CGGGCTTAACCCGTGAAGTGTCTTTGAAACTGTTGGTCTTGGTATCGGAGAGGTAATCGGAATTCCTTGTGTAGCGGTG  
AAATGCGTAGATATAAGGAAGAACACCGAGTGGCGAAGGCGGATTACTGGACGACAACGACGTTGAGGCTCGAAAGCGTG  
GGGAG

>ASV:867:Genus:GCA-900066575  
TACGTAGGGGGCAAGCGTTATCCGGATTTACTGGGTGTAAGGGAGCGTAGGCGGCGAGCGCAAGTCAGAAGTGAAGGCC  
GGGGCTCAACTCCGGGACTGCTTTGAAACTGTGTAGCTAGATTGCAGGAGAGGTAAGTGAATTCCCTAGTGTAGCGGTG  
AAATGCGTAGATATTAGGAGGAACACCGAGTGGCGAAGGCGGCTTACTGGACTGTAATGACGCTGAGGCTCGAAAGCGTG  
GGGAG

>ASV:868:Genus:Lachnospiraceae\_UCG-004  
TACGTAGGGGGCAAGCGTTATCCGGATTTACTGGGTGTAAGGGAGCGTAGACGGCGACGCAAGTCTGAAGTGAATAC  
CGGGCTCAACCTGGGAAGTGTCTTGGAACTGTGTTGCTGGAGTGTGGAGAGGTAAGCGGAATTCCTAGTGTAGCGGTG



AAATGCGTAGATATTAGGAAGAACCACAGTGGCGAAGGCGGCTTACTGGACAGTAACTGACGTTGAGGCTCGAAAGCGTG  
GGAG  
>ASV:869:Genus:Prevotella\_9  
TACGGAAGGTCCGGCGTTATCCGGATTTATTGGGTTTAAAGGGAGCGTAGGCCGGAGATTAAGCGTGTGTGAAATGTA  
GATGCTCAACATCTGCACTGCAGCGCAACTGGTTTCCTTGTAGTACGCACAAAGTGAAGCGGAATTCGTGGTGTAGCGGTG  
AAATGCTTAGATATACGAAGAACCAGTTCGGAAGGCAGTCACTGGAGCGCAACTGACGCTGAAGCTCGAAAGTGGC  
GGTAT  
>ASV:870:Species:mutans  
TACGTAGGTCCCGAGCGTTGTCCGGATTTATTGGGCGTAAAGGGAGCGCAGGCGGTGAGGAAAGTCTGGAGTAAAAGGCT  
ATGGCTCAACCATAGTGTGCTCTGGAAACTGTCTGACTTGTAGTGCAGAAAGGGAGAGTGAATTCATGTGTAGCGGTGA  
AATGCGTAGATATATGGAGGAACACCAGTGGCGAAAGCGGCTCTCTGGTCTGTCACTGACGCTGAGGCTCGAAAGCGTG  
GTAGC  
>ASV:871:Family:Lachnospiraceae  
TACGTAGGGGGCAAGCGTTATCCGGATTTACTGGGTGTAAGGGAGCGTAGACGGCAGCGCAAGTCTGAAGTAAAAGCCC  
GGGGCTCAACCCCGGAATGGCTTTGAAACTGTGCGCTAGAGTACCGAGGGGTAAAGCGGAATTCCTAGTGTAGCGGTG  
AAATGCGTAGATATTAGGAGGAACACCAGTGGCGAAGGCGGCTTACTGGACGTAAGTGAAGTTCGAAAGCGTG  
GGAG  
>ASV:872:Species:difficile  
TACGTAGGGGGCTAGCGTTATCCGGATTTACTGGGCGTAAAGGGTGCCTAGGCGGTCTTTCAAGTCAAGGAGTAAAAGGCT  
ACGGCTCAACCGTAGTAAGCTCTTGAAGTGGGAGACTTGTAGTGCAGGAGAGAGAGTGAATTCCTAGTGTAGCGGTGA  
AATGCGTAGATATTAGGAGGAACACCAGTGGCGAAGGCGGCTCTCTGGACTGTAAGTGAAGTGAAGGCTCGAAAGCGTG  
GGAGC  
>ASV:873:Species:longoviformis  
TACGTAAAGGGCAAGCGTTATCCGGATTTACTGGGTGTAAGGGAGCGTAGACGGCAGTGAAGTCTGATGTGAAAGCCC  
GGGGCTCAACCCCGGACTGCATTGAAACTGTGAGCTAGAGTGTGCGAGAGGTAAAGTGAATTCCTAGTGTAGCGGTG  
AAATGCGTAGATATTAGGAGGAACACCAGTGGCGAAGGCGGCTTACTGGACGATAACTGACGTTGAGGCTCGAAAGCGTG  
GGAG  
>ASV:874:Genus:Ruminococcaceae\_UCG-010  
TACGTAGGTGGCGAGCGTTATCCGGATTTACTGGGTGTAAGGGTGTAGGCGGGAAGTCAAGTCAAGTGTGAAATGCC  
GCGGCTTAACTGCGGAAGTGCATTTGAAACTGATTTCTTGTAGAGTGGAGAGGCAATCGGAATTCCTAGTGTAGCGGTG  
AAATGCGTAGATATTAGGAGGAACACCAGTGGCGAAGGCGGATTGCTGGACGACAAGTGAAGTTCGAAAGCGTG  
GGAG  
>ASV:875:Genus:Christensenellaceae\_R-7\_group  
TACGTAGGGGGCGAGCGTTGTCCGGAATGACTGGGCGTAAAGGGCGTGTAGGCGGCTTTTTAAGTCTGGAGTAAAAGCCC  
CTTTTTCAAGGAGGGGAGTGTCTTGGAGACTGGAGAGCTTGTAGTGCAGGAAAGGTAAAGTGAATTCCTAGTGTAGCGGTG  
AAATGCGTAGAGATTGGGAGGAACACCAGTGGCGAAGGCGACTTACTGGGCCGTAAGTGAAGTTCGAAAGCGTG  
GGAG  
>ASV:876:Family:Barnesiellaceae  
TACGGAAGATGCGAGCGTTATCCGGATTTATTGGGTTTAAAGGGTGCCTAGGCGGGTATTAAGTCAAGCGGTGAAATGCG  
TCAGCTTAACTGGCGAAGTGCATTTGAAACTGTTTACCTTGTAGTGTAGCGGAAAGTATGCGGAATGCGTGGTGTAGCGGTG  
AAATGCGTAGATATACGCAGAACCAGTTCGGAAGGCAGCATACCATATAACTGACGCTGAAGCACGAAAGCGTG  
GGTAT  
>ASV:877:Genus:Lachnospiraceae\_NC2004\_group  
TACGTAGGGTCAAGCGTTATCCGGATTTACTGGGTGTAAGGGCGAGTAGACGGCATAGCAAGTCAAGTGTGAAAACCTT  
AGAGCTCAACTTTAAGACTGCATCTGAAACTGTTAAGCTAGAGTGCAGAAAGGTAAAGTGAATTCCTAGTGTAGCGGTG  
AAATGCGTAGATATTAGGAGGAACACCAGTGGCGAAGGCGACTTACTGGGCTGTAAGTGAAGTTCGAAAGCGTG  
GGAG  
>ASV:878:Species:faecihominis/pamelaeae  
TACGTAGGGGGCGAGCGTTATCCGGATTCATTGGGCGTAAAGCGCGCTAGGCGGCCGTCGAAAGCGGAACTCTAACCCG  
AGGGCTCAACCCCGGTGCGGTTCCGAACTGGCAGGCTCAGTGTGTTAGTAGAGGAAGTGAATTCCTAGTGTAGCGGTG  
AATGCGCAGATATCGGAAGAACCAGTGGCGAAGGCGACTTCTGGGCCATCAACTGACGCTGAGGCGCGAAAGCTGG  
GGAG  
>ASV:879:Genus:Hydrogenoanaerobacterium  
TACGTAGGGAGCGAGCGTTGTCCGGAATTAAGGGTGTAAAGGGAGCGTAGGCGGGAGTGAAGTGAATGTTAATCTA  
TGGGCTCAACCCATATCAGCGTTCAAAGTGCATTTCTTGTAGTGAAGTAGAGGTTGGCGGAATTCCTAGTGTAGCGGTGA  
AATGCGTAGATATTAGGAGGAACACCAGTGGCGAAGGCGCAACTGGGCTTTACTGACGCTGAGGCTCGAAAGCGTG  
GGAGC  
>ASV:880:Species:denticariosi/parvula  
TACGTAGGTGGCAAGCGTTGTCCGGAATTTATTGGGCGTAAAGCGCGCGCAGGCGGATCAGTCACTGTCTTAAAAGTTC  
GGGGCTTAAACCCGTTAGGGGATGAAACTGTGATCTAGAGTATCGGAGAGGAAAGTGAATTCCTAGTGTAGCGGTGA  
AATGCGTAGATATTAGGAAGAACCAGTGGCGAAGGCGACTTCTGGACGAAAAGTGAAGTTCGAAAGCGTG  
GGAGC  
>ASV:881:Genus:Ruminococcaceae\_NK4A214\_group  
TACGTAGGTGGCCAGCGTTATCCGGATTTACTGGGTGTAAGGGCGCGTAGGCGGGAATGCAAGTCAAGTGTGAAATCCA  
AGGGCTCAACCCCTGAACTGCATTTGAAACTGATTTCTTGTAGTGTGCGAGAGGTTGACGGAATTCCTAGTGTAGCGGTG  
AAATGCGTAGATATTAGGAGGAACACCAGTGGCGAAGGCGGTCAACTGGACGATAACTGACGCTGAGGCGCGAAAGCGTG  
GGAG  
>ASV:882:Genus:Phascolarctobacterium

TACGTAGGTGGCGAGCGTTGTCCGGAATTATTGGGCGTAAAGAGCATGTAGGCGGCTTTGTAAGTCGGGCGTGAAAATGC  
GGGGCTCAACCCCGTATGGCGCTTGAAGTGAAGGCTTGTAGTGCAGGAGAGGAAAGGGGAATCCAGTGTAGCGGTGA  
AATGCGTAGATATTGGGAGGAACACCAGTGGCGAAGGCGCTTCTGACTGTGTCTGACGCTGAGATGCGAAAGCCAGG  
GTAGC  
>ASV:883:Genus:Agathobacter  
TACGTATGGTGCACGCGTTATCCGGATTTACTGGGTGTAAAGGGAGCGCAGGCGGTGCGGCAAGTCTGATGTGAAAGCCC  
GGGGCTCAACCCCGTACTGCATTGGAAGTGTCTGACTAGAGTGTGCGATGGGTAAGTGAATTCCTAGTGTAGCGGTG  
AATGCGTAGATATTAGGAGGAACACCAGTGGCGAAGGCGGCTTACTGGACGATAACTGACGCTGAGGCTCGAAAGCGTG  
GGGAG  
>ASV:884:Genus:Lactobacillus  
TACGTAGGTGGCAAGCGTTATCCGGATTTATTGGGCGTAAAGCGAGCGCAGGCGGTTTGATAAGTCTGATGTGAAAGCCT  
TTGGCTTAACCAAAGAAGTGCATCGGAACTGTGACTAGAGTGTGCGATGGGTAAGTGAATTCCTAGTGTAGCGGTG  
GAATGCGTAGATATATGGAAGAACACCAGTGGCGAAGGCGGCTGTCTGGTCTGCAACTGACGCTGAGGCTCGAAAGCATG  
GGTAG  
>ASV:885:Family:Lachnospiraceae  
TACGTAGGGGGCAAGCGTTATCCGGATTTACTGGGTGTAAAGGGAGCGTAGACGGTTAAGCAAGTCAGAAGTAAAAGGCT  
GGGGCTCAACCCGGGACTGCTTTTGAAGTGTAACTAGAGTGTGAGAGGTAAGCGGAATTCCTAGTGTAGCGGTG  
AATGCGTAGATATTAGGAGGAACACCAGTGGCGAAGGCGGCTTACTGGACGTAAGTGAAGTGTGAGGCTCGAAAGCGTG  
GGGAG  
>ASV:886:Genus:Clostridium\_sensu\_stricto\_1  
TACGTAGGTGGCGAGCGTTGTCCGGAATTACTGGGCGTAAAGGGAGCGTAGGCGGACTTTTAAAGTGAAGTGTGAAATACC  
CGGGCTCAACTGGGTGCTGCATTCGAACTGGAAGTCTAGAGTGCAGGAGAGGAGAATGGAATTCCTAGTGTAGCGGTG  
AATGCGTAGAGATTAGGAAGAACACCAGTGGCGAAGGCGATTCTCTGGACTGTAAGTGAAGTGTGAGGCTCGAAAGCGTG  
GGGAG  
>ASV:887:Species:detusculanense/insidiosa/mannitolilytica/pickettii/solanacearum/syzygii  
TACGTAGGGTCAAGCGTTAATCGGAATTACTGGGCGTAAAGCGTGCAGGCGGTTGTGCAAGACCGATGTGAAATCCC  
CGAGCTTAACCTGGGAATTGCATTGGTACTGCACGGCTAGAGTGTGTCAGAGGGGGGTAGAATCCACGTGTAGCAGTG  
AATGCGTAGAGATTGGGAGGAATACCGATGGCGAAGGCGCCCTGGGATAACACTGACGCTCATGCACGAAAGCGTG  
GGGAG  
>ASV:888:Family:Erysipelotrichaceae  
TACGTAGGTGGCGAGCGTTATCCGGAATCATTGGGCGTAAAGGGTGCCTAGGCGGCGAGTTAAGTCTGAGGTAAAAGGTT  
GCAGCTCAACTGTAACAAGCCTTGGAACTGACTAGTGTAGAGTGCAGGAGAGGCGAGTGAATTCCTAGTGTAGCGGTAA  
AATGCGTAGATATATGGAAGAACACCAGTGGCGAAGGCGGCTGTCTGGCCTGTAAGTGAAGTGTGAGGCTCGAAAGCGTG  
GGAGC  
>ASV:889:Genus:Bacteroides  
TACGGAGGATCCGAGCGTTATCCGGAATTATTGGGTTTAAAGGGAGCGTAGGCGGACGCTTAAGTCAAGTGTGAAAGTTT  
GCGGCTCAACCGTAAATTCAGTTGATACTGGGTGCTTGTAGTACAGTGTAGAGGTAGGCGGAATTCGTTGGTGTAGCGGTG  
AATGCTTAGATATCAGGAAGAACTCCGATTGCGAAGGCGACTTCTGGACTGTAAGTGAAGTGTGAGGCTCGAAAGTGTG  
GGTAT  
>ASV:890:Species:adiacens/para-adiacens  
TACGTAGGTGGCAAGCGTTGTCCGGAATTATTGGGCGTAAAGCGAGCGCAGGCGGTTCTTAAGTCTGATGTGAAAGCCC  
CCGGCTCAACCGGGAGGGTCAATTGGAAGTGGGAACTTGTAGTGCAGGAGAGGAAAGCGGAATTCCTAGTGTAGCGGTG  
AATGCGTAGATATATGGAAGAACACCAGTGGCGAAGGCGACTCTCTGGTCTGTAAGTGAAGTGTGAGGCTCGAAAGCGTG  
GGTAG  
>ASV:891:Genus:Family\_XIII\_AD3011\_group  
TACGTAGGGGGCAAGCGTTATCCGGAATTATTGGGCGTAAAGAGTACGTAGGTGGTTACCTAAGCAAGGGGTTTAAAGCA  
ATGGCTTAACCTATTGTTCCGCCCTTGAAGTGGGCTACTTGTAGTGCAGGAGAGGAAAGCGGAATTCCTAGTGTAGCGGTG  
AATGCGTAGATATTAGGAGGAACACCAGTGGCGAAGGCGGCTTCTGGACTGTAAGTGAAGTGTGAGGCTCGAAAGCGTG  
GGAGC  
>ASV:892:Family:Ruminococcaceae  
TACGTAGGGAGCGAGCGTTGTCCGGAATTACTGGGTGTAAAGGGAGCGTAGGCGGAAAGCAAGTTGGAAGTGAATGCA  
TGGGCTCAACCCATGAGCTGCTTTCAAACTGTTTTCTTGTAGTGAAGTGAAGGCGAGGCGGAATTCCTAGTGTAGCGGTG  
AATGCGTAGATATTAGGAGGAACACCAGTGGCGAAGGCGGCTGCTGGGCTTAACTGACGCTGAGGCTCGAAAGCGTG  
GGTAG  
>ASV:893:Species:bivia/denticola  
TACGGAAGGTTCCGGCGTTATCCGGATTTATTGGGTTTAAAGGGAGCGTAGGCGGTTTGGTAAGCGTGTGTGAAATGTA  
GGAGCTCAACTTCTAGATTGACGCGGAACTGTGACTTGTAGTGCAGCACAAGTGAAGGCGGAATTCATGGTGTAGCGGTG  
AATGCTTAGATATCATGAAGAATCCGATTGCGAAGGCGACTTACGGGAGCGCAACTGACGCTGAAGCTCGAAAGTGTG  
GGTAT  
>ASV:894:Species:shahii  
TACGGAGGATCAAGCGTTATCCGGAATTATTGGGTTTAAAGGGTGCCTAGGCGGTTTGGTAAGTGTAGAGTGAATACCC  
GGTGCTTAACACCGGAACTGCTTCAATACTGTTGACTAGAGAGTGTGGGTTAGGCGGAATGTATGGTGTAGCGGTG  
AATGCTTAGAGATCATACAGAACACCAGTGGCGAAGGCGGCTTACCAAATATATCTGACGTTGAGGACGAAAGCGTG  
GGGAG  
>ASV:895:Genus:Sellimonas  
TACGTATGGTGCACGCGTTATCCGGATTTACTGGGTGTAAAGGGAGCGTAGACGGATAGGCAAGTCTGGAGTAAAACCC  
AGGGCTCAACCTGGGACTGCTTTGGAAGTGCAGATCTGGAGTGCAGGAGAGGTAAGCGGAATTCCTAGTGTAGCGGTG  
AATGCGTAGATATTAGGAGGAACACCAGTGGCGAAGGCGGCTTACTGGACGGTGTGACGCTGAGGCTCGAAAGCGTG

GGGAG  
>ASV:896:Species:animalis  
TACGTAGGGTCCGAGCGTTATCCGGATTTATTGGGCGTAAAGGGCTCGTAGGCGGTTCTGTCGCGTCCGGTGTGAAAGTCC  
ATCGCCTAACGGTGGATCTGCGCCGGGTACGGGCGGGCTGGAGTGGGTAGGGGAGACTGGAATTCGCGGTGTAAACGGTG  
GAATGTGTAGATATCGGAAGAACACCAATGGCGAAGGCAGGTCTCTGGGCCGCTACTGACGCTGAGGAGCGAAAGCGTG  
GGGAG  
>ASV:897:Species:hankookensis/panni  
TACGGAGGGGCTAGCGTTTGTTCGGAATTAAGGCGCACGTAGGCGGCTTGTAAAGTTAGAGGTGAAAGCCT  
GGAGCTCAACTCCAGAAGTGCCTTTAAGACTGCATCGCTTGAATCCAGGAGAGGTGAGTGGAATTCGAGTGTAGAGGTG  
AAATTCGTAGATATTCGGAAGAACACCAAGTGGCGAAGGCAGGCTACTGGACTGGTATTGACGCTGAGGTGCGAAAGCGTG  
GGGAG  
>ASV:898:Genus:Lachnospira  
TACGTATGGAGCAAGCGTTATCCGGATTTACTGGGTGTAAGGGAGGTAGGTGGCATCACAAGTCAGAAGTAAAAGCCT  
GGGGCTCAACCCCGGACTGCTTTTAAAAGTGTGGAGCTGGAGTGCAGGAGAGGCAAGTGAATTCCTAGTGTAGCGGTG  
AAATGCGTAGATATTAGGAGGAACACCAAGTGGCGAAGGCAGGCTTCTGGACTGTAACGACACTGAGGCTCGAAAGCGTG  
GGGAG  
>ASV:899:Family:Ruminococcaceae  
TACGTAGGGAGCGAGCGTTTGTCCGGATTTACTGGGTGTAAGGGTGCCTAGGCGGGATGGCAAGTCAGATGTAAATGCC  
GGGGCTCAACCCCGGAGCTGCATTTGAAACTGTGCTTCTTGGAGTGAAGTAGAGGCAGGCGGAATTCCTAGTGTAGCGGTG  
AAATGCGTAGATATTAGGAGGAACACCAAGTGGCGAAGGCAGGCTTCTGGACTGTAACGACACTGAGGCTCGAAAGCGTG  
GGGAG  
>ASV:900:Genus:Lachnospiraceae\_UCG-008  
TACGTAGGGGCAAGCGTTATCCGGATTTACTGGGTGTAAGGGAGCGTAGGTGGTATGGCAAGTCAGAGGTGAAAACCC  
AGGGCTTAACTTGGGATTGCTTTTAAAAGTGTGAGACTAGAGTGCAGGAGGGGTAAGTGAATTCCTAGTGTAGCGGTG  
AAATGCGTAGATATTAGGAGGAACACCAAGTGGCGAAGGCAGGCTTACTGGACTGTAACGACACTGAGGCTCGAAAGCGTG  
GGGAG  
>ASV:901:Species:japonensis/mexicana  
TACGAAGGGTCAAGCGTTACTCGGAATTAAGGCGTAAAGCGTGCCTAGGTGGTGGTTTAAAGTCTGCTGTGAAAGCCC  
TGGGCTCAACCTGGGAATTGCAGTGGATACTGGATCACTAGAGTGTGGTAGAGGGATGCGGAATTTCTGGTGTAGCAGTG  
AAATGCGTAGAGATCAGAAGGAACATCCGTGGCGAAGGCAGGCTTCTGGCCAACTGACACTGAGGCACGAAAGCGTG  
GGGAG  
>ASV:902:Order:Molicutes\_RF39  
TACGTAGGGAGCGAGCGTTATCCGGATTTACTGGGTGTAAGGGTGTGTAGGCGGAAATTAAGTCTAAGGTCTAAGCCC  
GGAGCTCAACTCCGGTTCGCTTAGAAACTGATTTTCTTGGAGTGTGGTAGAGGCAAACGGAATTTCTAGTGTAGCGGTAA  
AATGCGTAGATATTAGAAGGAACACCAAGTGGCGAAGGCAGGTTTCTGGCCACTACTGACGCTGAGACACGAAAGCGTG  
GGAGC  
>ASV:903:Genus:Lachnoclostridium  
TACGTAGGGGCAAGCGTTATCCGGATTTACTGGGTGTAAGGGAGCGTAGACGGCGATGCAAGCCAGATGTGAAAGCCC  
GGGGCTCAACCTGGGACTGCATTTGAAACTGCGTGGCTGGAGTGTGCGAGAGGCAGGCGGAATTCCTAGTGTAGCGGTG  
AAATGCGTAGATATTAGGAGGAACACCAAGTGGCGAAGGCAGGCTTCTGGACGATGACTGACGTTGAGGCTCGAAAGCGTG  
GGGAG  
>ASV:904:Family:Ruminococcaceae  
TACGTAGGGAGCGAGCGTTTGTCCGGATTTACTGGGTGTAAGGGTGCCTAGGCGGGTCCGCAAGTCAGATGTGAAATACC  
GGGGCTTAACTCCGGGGCTGCATTTGAAACTGTTGATCTTGGAGTGAAGTAGAGGCAGGCGGAATTCCTAGTGTAGCGGTG  
AAATGCGTAGATATTAGGAGGAACACCAAGTGGCGAAGGCAGGCTTCTGGGCTTAACTGACGCTGAGGCACGAAAGCATG  
GGGAG  
>ASV:905:Genus:Dorea  
TACGTAGGGGCAAGCGTTATCCGGATTTACTGGGTGTAAGGGAGCGTAGACGGCACGACAAGCCAGATGTGAAAGCCC  
GGGGCTCAACCCCGGACTGCATTTGAAACTGCTGAGCTAGAGTGTGCGAGAGGCAAGTGAATTCCTAGTGTAGCGGTG  
AAATGCGTAGATATTAGGAGGAACACCAAGTGGCGAAGGCAGGCTTCTGGACGATGACTGACGTTGAGGCTCGAAAGCGTG  
GGGAG  
>ASV:906:Genus:Ruminococcaceae\_UCG-014  
TACGTAGGGAGCAAGCGTTATCCGGATTTATTGGGTGTAAGGGTGCCTAGACGGAATGCAAGTTAGTTGTGAAATCCC  
TCGGCTTAACTGAGGAAGTCAACTAAAACACTATTTCTTGGAGTATTGGAGGGGAAAGTGAATTCCTAGTGTAGCGGTG  
AAATGCGTAGATATTAGGAGGAACACCGGTGGCGAAGGCAGCTTCTGGACAATTAAGTACTGACGTTGAGGCACGAAAGGTG  
GGGAG  
>ASV:907:Genus:Parabacteroides  
TACGGAGGATCCGAGCGTTATCCGGATTTATTGGGTTTAAAGGGTGCCTAGGCGGCTTTTAAAGTCAAGCGGTGAAAGTCT  
GTGGCTCAACCATAGAATTGCCGTTGAAACTGGGGGCTTGGAGTATGTTTGGAGCAGGCGGAATGCGTGGTGTAGCGGTG  
AAATGCTTAGATATCACGAGAACCCGATTGCGAGGGCAGCCTGCCAAGCCATGACTGACGCTGATGACGAAAGCGTG  
GGAT  
>ASV:908:Species:isoflavoniconvertens  
TACGTAGGGGCGAGCGTTATCCGAATCATTGGGCGTAAAGCGCGCAGGCGGGCTTCAAGCGGCGGCTCGAAGCC  
GGGGCTCAACCCCGGAAGCGCCCGAACTGGAAGCCTCGGATGCGGCAGGGGAGGCGGAATTCGCGGTGTAGCGGTG  
AAATGCGCAGATATCGGAAGAACACCGAGCGGCAAGGCAGCCTCTGGCCGGCATCGACGCTGAGGCGCGAAAGCTGG  
GGGAG  
>ASV:909:Genus:Lachnospiraceae\_FCS020\_group  
TACGTAGGGGCAAGCGTTATCCGGATTTACTGGGTGTAAGGGAGCGTAGGTGGCAAGGCAAGCCAGAAGTAAAACCC

GGGGCTTAACCCCGTGGATTGCTTTTGGAACTGTCTGGCTAGAGTGCAGGAGGGCAGGCGGAATTCCTAGTGTAGCGGT  
GAAATGCGTAGATATTAGGAGGAACACCGGTGGCGAAGGCGGCTGCTGGACTGTAAGTACTGACTGAGGCTCGAAAGCGT  
GGGA

>ASV:910:Genus:Lachnospiraceae\_NK4A136\_group

TACGTAGGGGGCAAGCGTTATCCGGATTTACTGGGTGTAAAGGGAGTGTAGACGGCAAGGCAAGTCTGAAGTAAAGCCC  
GGTGCTTAACCCGGGACTGCTTTGAAACTGTTTAGCTGGAGTGCAGGAGGTAAGCGGAATTCCTAGTGTAGCGGTG  
AATGCGTAGATATTAGGAAGAACCACAGTGGCGAAGGCGGCTTACTGGACGGTAAGTACTGACGTTGAGGCTCGAAAGCGT  
GGGAG

>ASV:911:Genus:Roseburia

TACGTATGGTGAAGCGTTATCCGGACTTACTGGGTGTAAAGGGAGCGCAGGCGGTACGGCAAGTCTGATGTAAAGCCC  
GGGGCTCAACCCCGTACTGCATTGAAACTGTCGGACTAGAGTGTCCGGAGGGTAAGTGAATTCCTAGTGTAGCGGTG  
AATGCGTAGATATTAGGAGGAACACCAGTGGCGAAGGCGGCTTACTGGACGATTACTGACGCTGAGGCTCGAAAGCGT  
GGGAG

>ASV:912:Genus:Intestinimonas

TACGTAGGTGGCAAGCGTTATCCGGATTTACTGGGTGTAAAGGGCGGTAGGCGGGACTGCAAGTCAAGTGTGAAAATTA  
TGGGCTCAACCCATAACCTGCATTTGAAACTGTAGTTCTTGGAGTGTGGAGAGGCAATCGGAATTCCTGTGTAGCGGTG  
AATGCGTAGATATACGGAGGAACACCAGTGGCGAAGGCGGATTGCTGGACAGTAAGTACTGACGCTGAGGCGCGAAAGCGT  
GGGAG

>ASV:913:Species:gallinarum/pullorum/ramosum/saeculare/subtile

TACGTAGGGTGAAGCGTTATCCGGATTTATTGGGCTAAAGGGCTCGTAGGCGGTTCTGTCGCTGCTGGTGTAAAGTCC  
ATCGCTTAACCGTGGATCTGCGCCGGGTACGGGCGGGCTGGAGTGCAGGAGGAGACTGGAATTCCTGGTGTAAACCGT  
GAATGTGTAGATATCGGAAGAACCACATGGCGAAGGCGGCTCTGGGCCGTTACTGACGCTGAGGAGCGAAAGCGT  
GGGAG

>ASV:914:Species:parvula

TACGTAGGTGGCAAGCGTTGTCCGGAATTTATTGGGCTAAAGCGCGCAGGCGGATCGGTCAGTCTGTCTTAAAGTTC  
GGGGCTTAACCCCGTGTAGGATGGAATGCAATCTAGAGTATCGGAGAGGAAAGTGAATTCCTAGTGTAGCGGTGA  
AATGCGTAGATATTAGGAAGAACCACAGTGGCGAAGGCGACTTTCTGGACGAAACTGACGCTGAGGCGCGAAAGCCAG  
GGAGC

>ASV:915:Genus:Tyzzerella\_4

TACGTATGGTGAAGCGTTATCCGGATTTACTGGGTGTAAAGGGAGCGTAGACGGTTGTGAAGTCTGGTGTAAAGCCC  
GGGGCTCAACCCCGGACTGCATTGAAACTATGTAAGTGTCCGGAGAGGTAAGCGGAATTCCTAGTGTAGCGGTG  
AATGCGTAGATATTAGGAGGAACACCAGTGGCGAAGGCGGCTTACTGGACGATCACGCTGAGGCTCGAAAGCGT  
GGGAG

>ASV:916:Species:wadsworthia

TACGGAGGGTGAAGCGTTAATCGGAATCACTGGGCGTAAAGCGCACGTAGGCGGCTTGGTAAGTCAAGGGTGAATCCC  
ACAGCCCAACTGTGGAAGTGCCTTTGATACTGCAGGCTTGGTACCGGAGAGGGTGGCGGAATTCAGGTGTAGGAGT  
AATCGTAGATATCTGGAGGAACACCAGTGGCGAAGGCGGCACCTGGACGGTAAGTACTGACGCTGAGGTGCGAAAGCGT  
GGTAG

>ASV:917:Genus:Ruminococcaceae\_UCG-014

TACATAGGGAGCAAGCGTTATCCGGATTTATTGGGTGTAAAGGGTGCCTAGACGGGAAATTAAGTTAGTTGTGAAATCCC  
TTGGCTTAAGTGAAGAACTGCAACTAAACTGGTTTTCTTGGTACTGGAGAGGAAAGTGAATTCCTAGTGTAGCGGTG  
AATGCGTAGATATTAGGAGGAACACCAGTGGCGAAGGCGGCTTCTGGACGTAAGTACTGACGTTGAGGCACGAAAGTGT  
GGGAG

>ASV:918:Genus:Lachnospiraceae\_NC2004\_group

TACGTATGGAGCAAGCGTTATCCGGATTTACTGGGTGTAAAGGGTGCCTAGGCGGCACAGCAAGTCAAGTGTAAAGACC  
GGGGCTCAACCCCGGGCTGCATTTGAAACTGCCGAGCTTGGTCCGGAGAGGCAAGCGGAATTCCTAGTGTAGCGGTG  
AATGCGTAGATATTAGGAGGAACACCAGTGGCGAAGGCGGCTGCTGGACCGAAGTACTGACGCTGAGGCACGAAAGCGT  
GGGAG

>ASV:919:Genus:Libanicoccus

TACGTATGGGGCAGCGTTATCCGGATTCATTGGGCGTAAAGCGCGCTAGGCGGCTCGTAGGCGGGAGTCAAATCCG  
GGGGCTCAACCCCGCCGCTCCCGGAACCCGAGGCTTGGTCTGGCAGGGGAGGGTGAATTCAGTGTAGCGGTG  
AATGCGCAGATATTGGGAAGAACCACCGGTGGCGAAGGCGGCCCTCTGGCCACGACTGACGCTGAGGCGCGAAAGCTGG  
GGAGC

>ASV:920:Genus:Blautia

TACGTAGGGGGCAAGCGTTATCCGGATTTACTGGGTGTAAAGGGAGCGTAGACGGACGGGCAAGTCTGAAGTAAAGGCA  
GGGGCTCAACCCCTGGACTGCTTTGAAACTGTCCATCTAGAGTGCAGGAGAGGTAAGCGGAATTCCTAGTGTAGCGGTG  
AATGCGTAGATATTAGGAGGAACACCAGTGGCGAAGGCGGCTTACTGGACGGTAAGTACTGACGTTGAGGCTCGAAAGCGT  
GGGAG

>ASV:921:Genus:Lachnospiraceae\_UCG-001

TACGTATGGTGAAGCGTTATCCGGATTTACTGGGTGTAAAGGGAGCGCAGGCGGTTTGGCAAGTCTGATGTGAAAATCC  
GGGGCTCAACTCCGGAAGTGCATTGAAACTGTCAGACTAGAGTGTCCGGAGAGGTAAGTGAATTCCTAGTGTAGCGGTG  
AATGCGTAGATATTAGGAGGAACACCAGTGGCGAAGGCGGCTTACTGGACGATAAGTACTGACGCTGAGGCTCGAAAGCGT  
GGGAG

>ASV:922:Genus:Ruminiclostridium\_1

TACGTAGGTGGCAAGCGTTGTCCGGATTTACTGGGTGTAAAGGGCGGTAGGCGGGTCAAGTCAAGTCAAGTGTGAAATGCC  
GGGGCTTAACCCGGAAGTGCATGAAACTGTTGATCTTGGAGTACTGGAGAGGAAAGTGAATTCCTAGTGTAGCGGTG  
AATGCGTAGATATTAGGAGGAACACCAGTGGCGAAGGCGGCTTCTGGACAGTAAGTACTGACGCTGAGGCGCGAAAGCGT  
GGGAG

>ASV:923:Genus:Subdoligranulum  
AACGTAGGGTGC AAGCGTTGTCCGGAATTACTGGGTGTAAAGGGAGCGCAGGCGGACCGGCAAGTTGGAAGTGAAAACCTA  
TGGGCTCAACCCATAAATTGCTTTCAAACCTGCTGGCCTTGAGTAGTGCAGAGGTAGGTGGAATTCCTGGGTGTAGCGGTG  
GAATGCGCAGATATCGGGAGGAACACCAAGTGGCGAAGGCGACCTACTGGGCACCAACTGACGCTGAGGCTCGAAAGCATG  
GGTAG

>ASV:924:Genus:Anaerofustis  
TACGTAGGGGGCAAGCGTTGTCCGATTACTGGGCGTAAAGAGCACGTAGGCGGTTAATTAAGTCAGGTGTGAAAGTTT  
TCGGCTCAACCGGAAAAGTGCATTGAAACTGGATAACTTGAGTATCGGAGAGGTAAGCGGAATTCCTAGTGTAGCGGTG  
AAATGCGTAGAGATTAGGAAGAACACCGGTGGCGAAGGCGGCTTACTGGACGATAACTGACGCTGAGGTGCGAAAGCGTG  
GGGAG

>ASV:925:Genus:Prevotella\_9  
TACGGAAGGTCCGGCGTTATCCGGATTTATTGGGTTTAAAGGGAGCGTAGGCCGAGGTTAAGCGTGTGTGAAATGTA  
GGGGCTCAACCTCTGCACTGCAGCGCAACTGGCTTGCTTGGAGTACGCACAACGTGGCGGAATTCGTGGTGTAGCGGTG  
AAATGCTTAGATATCACGAAGAACTCCGATTGCGAAGGCAGCTCACGGGAGCGCAACTGACGCTGAAGCTCGAAAGTGCG  
GGTAT

>ASV:926:Genus:Parabacteroides  
TACGGAGGATCCGAGCGTTATCCGGATTTATTGGGTTTAAAGGGTGCCTAGGCGGCTTTTAAAGTCAGCGGTGAAAGTCT  
GTGGCTCAACCTAGATTGCTCTGGAACTGGGGGCTTGGATGTTTGGAGGAGGCGGAATGCGTGGTGTAGCGGTG  
AAATGCTTAGATATCACGAAGAACTCCGATTGCGAAGGCAGCTCACTAGACTGCAACTGACACTGATGCTCGAAAGTGTG  
GGTAT

>ASV:927:Genus:Catenisphaera  
TACGTAGGTGGCGAGCGTTATCCGGAATGATTGGGCGTAAAGGGTACGTAGGCGGCATGATAAGTCTGGAGTGAAGGCT  
ACAGCTCAACCTGTAGTATGCTCTGGAACTGTCAAGCTAGAGTGCAGAAAGAGGGCAATGGAATTCATGTGTAGCGGTAA  
AATGCGTAGATATATGGAAGAACACCGGTGGCGAAGGCGGTTGCCTGGTCTGAAACTGACGCTGAAGTACGAAAGCGTGG  
GGAG

>ASV:928:Species:glucerasea  
TACGTAGGGGGCAAGCGTTATCCGGATTTACTGGGTGTAAAGGGAGCGTAGACGGAGCAGCAAGTCTGATGTGAAAGGCA  
GGGGCTCAACCCCTGGACTGCATTGGAACCTGTTGATCTTGGAGTACCGGAGGGTAAGCGGAATTCCTAGTGTAGCGGTG  
AAATGCGTAGATATTAGGAGGAACACCAAGTGGCGAAGGCGGCTTACTGGACGTAAGTACGCTTGGAGCTCGAAAGCGTG  
GGGAG

>ASV:929:Order:Bacteroidales  
TACGGAAGGTCCAGGCGTTATCCGGATTTATTGGGTTTAAAGGGAGCGTAGGCGGGAGTCAAGTCAGTTGTGAAAAGCC  
ACGGCCCAACCGTGGTCTGTCAGTTGAAACTGGTTCTTGGAGTGCACAGGACGGTGAATTCGTGGTGTAGCGGTG  
AAATGCTTAGATATCACGAAGAACTCCGATTGCGAAGGCAGCTCCGGAGCGTTACTGACGCTGAGGCTCGAAAGTGTG  
GGTAT

>ASV:930:Genus:Paraprevotella  
TACGGAAGATGCGAGCGTTATCCGGATTTATTGGGTTTAAAGGGAGCGTAGGCGGGCTTTTAAAGTCAGCGGTCAAATGTC  
GTGGCTCAACCATGTCAAGCCGTTGAAACTGCAAGCCTTGGAGTCTGCACAGGGCACATGGAATTCGTGGTGTAGCGGTGA  
AATGCTTAGATATCACGAAGAACTCCGATCGGAAGGCATTGTGCCGGGCATAACTGACGCTGAGGCTCGAAAGTGTGCG  
GTATC

>ASV:931:Species:cocoides/producta  
TACGTAGGGGGCAAGCGTTATCCGGATTTACTGGGTGTAAAGGGAGCGTAGACGGAAGGCAAGTCTGATGTGAAAGGCT  
GGGGCTTAAACCCAGGACTGCATTGGAACCTGTTGTTCTAGAGTGCAGGAGAGGTAAGCGGAATTCCTAGTGTAGCGGTG  
AAATGCGTAGATATTAGGAGGAACACCAAGTGGCGAAGGCGGCTTACTGGACGTAAGTACGCTTGGAGCTCGAAAGCGTG  
GGGAG

>ASV:932:Order:Clostridiales  
TACGTAGGGGGCGAGCGTTGTCCGGAATTACTGGGCGTAAAGGGCGCGCAGGCGGCCATCAAGTTAGATGTGAAATACC  
CGGGCTTAACTGGAACTGCATTTAAACTGGTTGGCTAGGAGTGCAGGAGAGGGAAGCGGAATTCCTAGTGTAGCGGTG  
GAAATGCGTAGATATTAGGAGGAACACCAAGTGGCGAAGGCGGCTTCTGGACTGTAAGTACGCTGAGGCGCGAAAGCGT  
GGGGA

>ASV:933:Family:Lachnospiraceae  
TACGTATGGAGCAAGCGTTATCCGGATTTACTGGGTGTAAAGGGAGCGTAGACGTTGTGCAAGTCTGATGTGAAATTC  
AGGGCTTAACTGGACTGCATTGGAACCTGTATAACTAGAGTGTCCGAGAGGTGAGTGAATTCCTAGTGTAGCGGTG  
AAATGCGTAGATATTAGGAGGAACACCAAGTGGCGAAGGCGGCTCACTGGACGATAACTGACGTTGAGGCTCGAAAGCGTG  
GGGAG

>ASV:934:Genus:Prevotella\_9  
TACGGAAGGTCCGGCGTTATCCGGATTTATTGGGTTTAAAGGGAGCGTAGGCCGAGATTAAGCGTGTGTGAAATGTA  
GATGCTCAACATCTGCACTGCAGCGCAACTGTTTCTTGGAGTACGCATAAAGTGGCGGAATTCGTGGTGTAGCGGTG  
AAATGCTTAGATATCACGAAGAACTCCGATTGCGAAGGCAGCTCACTGGGCGCAACTGACGCTGAAGCTCGAAAGCGCG  
GGTAT

>ASV:935:Family:Lachnospiraceae  
TACGTATGGAGCAAGCGTTATCCGGATTTACTGGGTGTAAAGGGAGCGTAGGCGGTATGGAAGTCTGATGTGAAAGGCC  
GGGGCTCAACCCGGGACTGCATTGGAACCTGTCACACTTGGAGTGTCCGAGAGGTAAGTGAATTCCTAGTGTAGCGGTG  
AAATGCGTAGATATTAGGAGGAACACCAAGTGGCGAAGGCGGCTTACTGGACGACAAGTACGCTGAGGCTCGAAAGCGTG  
GGGAG

>ASV:936:Genus:Prevotella\_9  
TACGGAAGGTCCGGCGTTATCCGGATTTATTGGGTTTAAAGGGAGCGTAGGCCGAGATTAAGCGTGTGTGAAATGTA  
GGTGCTCAACATCTGCACTGCAGCGCAACTGTTTCTTGGAGTACGCACAAGTGGCGGAATTCGTGGTGTAGCGGTG

AAATGCTTAGATATCACGAAGAACTCCGATTGCGAAGGCAGCTCACTGGAGCGCAACTGACGCTGAAGCTCGAAAGTGCG  
GGTAT  
>ASV:937:Genus:Fusicatenibacter  
TACGTAGGGGGCAAGCGTTATCCGGATTTACTGGGTGTAAGGGAGCGTAGACGGCAAGCAAGTCTGATGTGAAAACCC  
AGGGCTTAACCTGGGACTGCATTGAAAAGTGTCTGGCTCGAGTTCCGGAGAGGTAAGCGGAATTCCTAGTGTAGCGGTG  
AAATGCGTAGATATTAGGAAGAACACCACTGCGAAGGCGGCTTACTGGACGTAACGACGTTGAGGCTCGAAAGCGTG  
GGGAG  
>ASV:938:Genus:Lachnoclostridium  
TACGTAGGGGGCAAGCGTTATCCGGATTTACTGGGTGTAAGGGAGCGTAGACGGCAAGCAAGTCTGGAGTAAAACCC  
AGGGCTCAACCTGGGACTGCTTTGAAAAGTGTCTGGCTCGAGTTCCGGAGAGGTAAGTGAATTCCTAGTGTAGCGGTG  
AAATGCGTAGATATTAGGAGGAACACCACTGCGAAGGCGGCTTACTGGACGATAACGACGTTGAGGCTCGAAAGCGTG  
GGGAG  
>ASV:939:Genus:Fournierella  
AACGTAGGTGGCAAGCGTTGTCCGGAATTTACTGGGTGTAAGGGAGCGCAGGCGGAAGGACAAGTTGGAAGTAAAACCA  
CGGGCTCAACCCGTAAGTGCATTTCAAAGTGTCTTTCTTGGTGTAGAGGTAGGCGGAATTCCTAGTGTAGCGGTG  
GAATGCGTAGATATTAGGAGGAACACCACTGCGAAGGCGGCTTACTGGGCACTAACGACGTTGAGGCTCGAAAGCATG  
GGTAG  
>ASV:940:Genus:Lachnospira  
TACGTATGGAGCAAGCGTTATCCGGATTTACTGGGTGTAAGGGAGGTAGGTGGTATCACAAAGTCAGAAGTAAAAGCCC  
GGGGCTCAACCCGGGACTGCTTTGAAAAGTGTGAACTAGAGTGCAGGAGAGGTAAGTGAATTCCTAGTGTAGCGGTG  
AAATGCGTAGATATTAGGAGGAACACCACTGCGAAGGCGGCTTACTGGACTGTAACGACGTTGAGGCTCGAAAGCGTG  
GGGAG  
>ASV:941:Species:korensis  
TACGAGGGGAGCTAGCGTTATTCGGAATTTACTGGGCGTAAAGGCGCACGTAGGCGGCTTTGTAAGTTAGAGGTAAAAGCCC  
GGGGCTCAACTCCGGAATTCGCTTTAAGACTGCATCGCTTGAATCCAGGAGAGGTAGTGAATTCCTAGTGTAGAGGTG  
AAATTCGTAGATATTAGGAGGAACACCACTGCGAAGGCGGCTTACTGGACTGTTGACGCTGAGGTGCGAAAGCGTG  
GGGAG  
>ASV:942:Family:Erysipelotrichaceae  
TACGTAGGTGGCAAGCGTTATCCGGAATCATTGGGCGTAAAGGGTGCCTAGGTGGCGTACTAAGTCTGTAGTAAAAGGCA  
ATGGCTCAACCATTTAAGCTATGAAAAGTGGTAGGCTAGAGTGCAGAAAGGGCGATGGAATTCCTAGTGTAGCGGTAA  
AATGCGTAGATATTAGGAGGAACACCACTGCGAAGGCGGCTCGCTGGTCTGTAACGACGTTGAGGACGAAAGCGTG  
GGAGC  
>ASV:943:Genus:Ruminococcaceae\_UCG-011  
TACGTAGGTGGCAAGCGTTGTCCGGAATTTACTGGGTGTAAGGGTGCCTAGGCGGCTTCTAAAGTCAGATGTGAAATACC  
GCAGCTCAACTGCGGGGCTGCATTTGAAAAGTGGGAGCTTGAAGTGAAGTAGAGGTAAGCGGAATTCCTAGTGTAGCGGTG  
GAATGCGTAGATATTAGGAGGAACACCACTGCGAAGGCGGCTTACTGGGCTTAACTGACGCTGAGGCACGAAAGCGTG  
GGGAG  
>ASV:944:Species:mesophila  
TACGTAGGGTGAAGCGTTGTCCGGAATTTACTGGGCGTAAAGAGCTCGTAGGCGGCTGTGCGCTGTGCTGTGAAAACCT  
AGGGCTTAACCTGGGCGTGCAGTGGGTACGGGCAGACTAGAGTGCAGTGGGAGGACTGGAATTCCTGGTGTAGCGGTG  
AAATGCGCAGATATCAGGAGGAACACCGGTGGCGAAGGCGGCTCTGGGCGTAACTGACGCTGAGGAGCGAAAGCATG  
GGGAG  
>ASV:945:Genus:Faecalibacterium  
AACGTAGGTCAACAAGCGTTGTCCGGAATTTACTGGGTGTAAGGGAGCGCAGGCGGGAAGACAAGTTGGAAGTAAAATCTA  
TGGGCTCAACCCATAAAGTGCATTTCAAAGTGTCTTTCTTGGTGTAGTGCAGAGGTAGGCAGAAATTCCTGGTGTAGCGGTG  
GAATGCGTAGATATTAGGAGGAACACCACTGCGAAGGCGGCTTACTGGGCACTAACGACGTTGAGGCTCGAAAGTGTG  
GGTAG  
>ASV:946:Genus:Lachnoclostridium  
TACGTAGGGGGCAAGCGTTATCCGGATTTACTGGGTGTAAGGGAGCGTAGACGGCGATGCAAGTCTGAAGTAAAAGCCC  
GGGGCTCAACCCGGGACTGCTTTGAAAAGTGCCTTGTAGAGTGTGGAGAGGTAAGTGAATTCCTAGTGTAGCGGTG  
AAATGCGTAGATATTAGGAGGAACACCACTGCGAAGGCGGCTTACTGGACAGTAACGACGTTGAGGCTCGAAAGCGTG  
GGGAG  
>ASV:947:Family:Veillonellaceae  
TACGTAGGTGGCAAGCGTTGTCCGGAATTTACTGGGCGTAAAGGGAGCGCAGGTGGGAAAATAAGTCTGTTTTAAAAGTGC  
GGGGCTCAACCCCGTATGGAATGAAAAGTGTCTTTCTTGGTGTAGTGCAGGAGAGGAAAGTGAATTCCTAGTGTAGCGGTG  
AATGCGTAGATATTAGGAGGAACACCACTGCGAAGGCGACTTCTGGACTGTAACGACGTTGAGGCTCGAAAGCCAGG  
GTAGC  
>ASV:948:Genus:Faecalibacterium  
AACGTAGGTCAACAAGCGTTGTCCGGAATTTACTGGGTGTAAGGGAGCGCAGGCGGGAAGACAAGTTGGAAGTAAAATCTA  
TGGGCTCAACCCATAAAGTGCATTTCAAAGTGTCTTTCTTGGTGTAGTGCAGAGGTAGGCAGAAATTCCTGGTGTAGCGGTG  
GAATGCGTAGATATTAGGAGGAACCCAGTGGCGAAGGCGGCTTACTGGGCACTAACGACGTTGAGGCTCGAAAGTGTG  
GGTAG  
>ASV:949:Genus:Ruminococcaceae\_UCG-014  
TACGTAGGGAGCAAGCGTTATCCGGATTTACTGGGTGTAAGGGTGCCTAGACGGGAAATTAAGTTAGTTGTGAAAAGCCC  
TCGGCTTAACTGAGGAACTGCAACTAAAAGTGGTTTTCTTGGTGTAGTGCAGGAGGAAAGTGAATTCCTAGTGTAGCGGTG  
AAATGCGTAGATATTAGGAGGAACACCACTGCGAAGGCGACTTCTGGACAGTAACGACGTTGAGGACGAAAGTGTG  
GGGAG  
>ASV:950:Genus:Bacteroides

TACGGAGGATCCGAGCATTATCCGGATTTATTGGGTTAAAGGGAGCGTAGGCGGGTTGTTAAGTCAGTTGTGAAAGTTT  
GCGGCTCAACCGTAAAATTGCAAGTTGATACTGGCGACCTTAGTACAACAGAGGTAGGCGGAATTCGTGGTGTAGCGGTG  
AAATGCTTAGATATCACGAAGAACTCCGATTGCGAAGGCAGCTTACTGGATTGTAACGACGCTGATGCTCGAAAGTGTG  
GGTAT

>ASV:951:Genus:Erysipelatoclostridium

TACGTAGGTGGCAGCGTTATCCGGAATTATTGGGCGTAAAGAGGGAGCAGGCGGGCAGAGGTCTGTGGTAAAAGACT  
GAAGCTTAACTTCAAGCAATAGAAACCGGGCTGCTAGAGTGCAGGAGAAGATCGTGAATTCCATGTGTAGCGGTGA  
AATGCGTAGATATATGGAGGAACACCAGTGGCGAAGGCAGCGTCTGGCCTGTAACGACGCTATTCCCGAAAGCGTGG  
GGAG

>ASV:952:Species:timonensis

TACGTAGGTGGCAAGCGTTGTCCGGAATTATTGGGCGTAAAGAGCATGTAGGCGGGCTTTAAGTCCGACGTGAAAATGC  
GGGGCTTAAACCCGATGGCGTTGGATACTGGGAGTCTTGTAGTGCAGGAGAGAAAGGGGAATTCAGTGTAGCGGTGA  
AATGCGTAGATATTGGAGGAACACCAGTGGCGAAGGCAGCGTCTGGACTGTGTGACGCTGAGATGCGAAAGCCAGG  
GTAGC

>ASV:953:Genus:Butyricimonas

TACGGGGGATGCGAGCGTTATCCGGATTTATTGGGTTAAAGGGCGCGTAGGCGGGCAGTCAAGTCAGCGGTAAAAGACT  
GCAGCTAACTGTAGCACCGCTTGAACCTGTGACCTCGAGACGAGACGAGGGAGGCGGAACAAGTGAAGTAGCGGTGA  
AATGCATAGATATCACTTGGAAACCCGATAGCGAAGGCAGCTTCCAGGCTCGTTCTGACGCTGATGCGCGAGAGCGTGG  
GTAGC

>ASV:954:Family:Lachnospiraceae

TACGTAGGGGGCAAGCGTTATCCGGATTTACTGGGTGTAAAGGGAGCGTAGACGGAATGGCAAGTCTGATGTAAAAGGCC  
GGGGCTCAACCCCGGACTGCATTGAAACTGTCAATCTAGAGTATCGGAGGGTAAGTGGAAATTCCTAGTGTAGCGGTG  
AAATGCGTAGATATTAGGAGGAACACCAGTGGCGAAGGCAGCGTACTGGACGTAACGACGTTGAGGCTCGAAAGCGTG  
GGAG

>ASV:955:Genus:Ruminococcus\_1

TACGTAGGGAGCGAGCGTTGTCCGGAATTACTGGGTGTAAAGGGAGCGTAGGCGGGATGGCAAGTCAAGTGTAAAAGCTA  
TGGGCTCAACCCATAGACTGCATTTGAAACTGCTGTTCTTGTAGTGTAGGTAAGCGGAATTCCTGGTGTAGCGGTG  
AAATGCGTAGATATCAGGAGGAACATCGGTGGCGAAGGCAGCGTACTGGGCTTTACTGACGCTGAGGCTCGAAAGCGTG  
GGAG

>ASV:956:Genus:Dorea

TACGTAGGGGGCAAGCGTTATCCGGATTTACTGGGTGTAAAGGGAGCGTAGACGGCACGGTAAGCCAGATGTAAAAGCCC  
GGGGCTCAACCCCGGACTGCATTTGAAACTGCTGAGCTAGAGTGTGGAGAGGCAAGTGGAAATTCCTAGTGTAGCGGTG  
AAATGCGTAGATATTAGGAGGAACACCAGTGGCGAAGGCAGCGTCTGGACGATGACTGACGTTGAGGCTCGAAAGCGTG  
GGAG

>ASV:957:Genus:Lachnoclostridium

TACGTAGGGGGCAAGCGTTATCCGGATTTACTGGGTGTAAAGGGAGCGCAGACGGCACTGCAAGTCTGAAGTAAAAGCCC  
GGGGCTCAACCCCGGACTGCATTTGAAACTGTAGAGCTAGAGTGTGGAGAGGCAAGCGGAATTCCTAGTGTAGCGGTG  
AAATGCGTAGATATTAGGAAGAACACCAGTGGCGAAGGCAGCGTCTGGACAGTAACGACGTTAGGCTCGAAAGCGTG  
GGAG

>ASV:958:Genus:Butyricimonas

TACGGGGGATGCGAGCGTTATCCGGATTTATTGGGTTAAAGGGCGCGTAGGCGGGACGGCAAGTCAGCGGTAAAAGACT  
GCAGCTAAACTGTAGCACCGCGTTGAAACTGTTGACCTCGAGACGAGACGAGGGAGGCGGAACAAGTGAAGTAGCGGTGA  
AATGCATAGATATCACGTGGAACCCGATAGCGAAGGCAGCTTCCAGGCTCGTTCTGACGCTGATGCGCGAGAGCGTGG  
GTAGC

>ASV:959:Genus:Blautia

TACGTAGGGGGCAAGCGTTATCCGGATTTACTGGGTGTAAAGGGAGCGTAGACGGATGGACAAGTCTGATGTAAAAGACT  
GGGGCTCAACCCCGGACTGCATTTGAAACTGCCCGTCTTGTAGTGTGGAGAGGTAAGCGGAATTCCTAGTGTAGCGGTG  
AAATGCGTAGATATTAGGAGGAACACCAGTGGCGAAGGCAGCGTACTGGACGTAACGACGTTGAGGCTCGAAAGCGTG  
GGAG

>ASV:960:Family:Sphingomonadaceae

TACGGAGGGAGCTAGCGTTGTCCGGAATTACTGGGCGTAAAGCGCACGCTAGGCGGCTTTGTAAGTCAGGGGTAAAAGCTT  
GGAGCTCAACTCCAGGACTGCCCTTGGAGACTGCATCGCTTGAATCCGGGAGAGGTGAGTGGAAATTCGAGTGTAGAGGTG  
AAATTCGTAGATATTCGGAAGAACACCAGTGGCGAAGGCAGCGTACTGGACCGGATGACGCTGAGGTGCGAAAGCGTG  
GGAG

>ASV:961:Genus:Lachnospiraceae\_UCG-010

TACGTAGGGGGCAAGCGTTATCCGGAATTACTGGGTGTAAAGGGTGTAGTAGGCGGCAGGCAAGTAAGTGTAAAAGCCC  
ACGGCTTAACTGTGGGATTGCAATTTAAACTGTTGAGCTAGAGTACAGGAGAGGAAAGCGGAATTCCTAGTGTAGCGGTG  
AAATGCGTAGATATTAGGAAGAACACCAGTGGCGAAGGCAGCGTCTGGACTGGAAACTGACGCTGAGGCACGAAAGCGT  
GGGA

>ASV:962:Genus:Bacteroides

TACGGAGGATCCGAGCGTTATCCGGATTTATTGGGTTAAAGGGAGCGTAGGCGGGTCTTAAAGTCAAGTGTAAAAGTTT  
GCGGCTCAACCGTAAAATTGCAAGTTGATACTGGGTACCTTGTAGTGCAGCATAGGTAGGCGGAATTCGTGGTGTAGCGGTG  
AAATGCTTAGATATCACGAAGAACTCTATTGCGAAGGCAGCTTACTGGACTGTAACGACGCTGATGCTCGAAAGTGTG  
GGTAT

>ASV:963:Genus:Fusobacterium

TACGTATGTCGCAAGCGTTATCCGGATTTATTGGGCGTAAAGCGCGTCTAGGCGGCTTAGTAAGTCTGATGTAAAAGTGC  
GGGGCTCAACCCCGTATTGCGTTGAAACTGTTAAACTAGAGTACTGGAGAGGTAGGCGGAACTACAAGTGTAGAGGTGA  
AATTCGTAGATATTGTAGGAATGCCGATGGGAAGCCAGCCTACTGGACAGATACTGACGCTAAAGCGCGAAAGCGTGG

GTAGC

>ASV:964:Family:Lachnospiraceae

TACGTATGGAGCAAGCGTTATCCGGATTTACTGGGTGTAAGGGTGCCTAGGTGGCAGTGCAAGTCAGATGTGAAAGGCC  
GGGGCTCAACCTCGGAGCTGCATTTGAAACTGCATAGCTAGAGTACAGGAGAGGCAGCGGAATTCCTAGTGTAGCGGTG  
AAATGCGTAGATATTAGGAGGAACACCAGTGGCGAAGGCGGCTTCTGGACTGTTACTGACACTGAGGCACGAAAGCGTG  
GGGAG

>ASV:965:Genus:Defluviitaleaceae\_UCG-011

TACGTAGGGGCGAGCGTTATCCGGATTTACTGGGTGTAAGGGTGCCTAGGCGGTACGGCAAGTTTGTATGTGAAACCTT  
CGGGCTTAACCCGGGGCATGCATCGAAAACCTGAACTAGAGTGCAGGAGAGGAAAGCGGAATTCCTAGTGTAGCGGTG  
AAATGCGTAGATATTAGGAAGAACACCAGTGGCGAAGGCGGCTTCTGGACTGCAACTGACGCTGAGGCACGAAAGCGTG  
GGGAG

>ASV:966:Genus:Ruminococcaceae\_UCG-014

TACGTAGGGAGCAAGCGTTATCCGGATTTATTGGGTGTAAGGGTGCCTAGACGGGAAAGCAAGTTAGTTGTGAAATCCC  
TCGGCTTAACCTGAGGAACTGCAACTAAAACCTGTTTTCTTGGAGTGTGGAGAGGAAAGTGAATTCCTAGTGTAGCGGTG  
AAATGCGTAGATATTAGGAGGAACACCAGTGGCGAAGGCGACTTCTGGACAATAACTGACGTTGAGGCACGAAAGTGTG  
GGGAG

>ASV:967:Order:Moillicutes\_RF39

TACGTAGGGAGCGAGCGTTATCCGGATTTATTGGGTGTAAGCGTGTAGGCGGTTACTTAAGTCTGTGGTCTAAGCCT  
GGAGCTCAACTCCAGTTCGCCATGAAACTGAGTTACTTGTAGTATGGTAGAGGCAAGTGAATTCCTAGTGTAGCGGTGG  
AATGCGTAGATATTAGAAGGAACACCAGTGGCGAAGGCGGCTTCTGGACATAACTGACGTTGAGGCACGAAAGCGTG  
GGAGC

>ASV:968:Genus:Blautia

TACGTAGGGGCGAAGCGTTATCCGGATTTACTGGGTGTAAGGGAGCGTAGACGGCGCAGCAAGTCTGATGTGAAAGGCA  
GGGGCTTAACCCCTGGACTGCATTGAAACTGTTGAGCTTGTAGTGCAGGAGGGTAAGCGGAATTCCTAGTGTAGCGGTG  
AAATGCGTAGATATTAGGAGGAACACCAGTGGCGAAGGCGGCTTACTGGACGTTAAGTACGCTTGGAGCTCGAAAGCGTG  
GGGAG

>ASV:969:Genus:Butyricicoccus

TACGTAGGGAGCAAGCGTTATCCGGATTTACTGGGTGTAAGGGGCGAGTAGGCGGGTGGCAAGTTGGGAGTGAATCCC  
GGGGCTTAACCCGGAAGTCTTTCAAACCTGCTGGTCTTGTAGTGTGGAGAGGCAGCGGAATTCCTGTGTAGCGGTG  
AAATGCGTAGATATACGGAGGAACACCAGTGGCGAAGGCGGCTTCTGGACATAACTGACGCTGAGGAGCGAAAGCGTG  
GGGAG

>ASV:970:Order:Bacteroidales

TACGGAAGGTCGGGCGTTATCCGGATTTATTGGGTTAAAGGGAGCGTAGGCGGGAGATCAAGTCAGTTGTGAAAAGCA  
GCCGCTCAACGGTTGCTGTCAGTTGATACTGGTTTTCTTGGAGTGCAGCGGAGGATGGTGAATTTGTGGTGTAGCGGTG  
AAATGCTTAGATATACAAAGAACTCCGATTGCGAAGGCAGCTGTCCGGAGCGCAACTGACGCTGAGGCTCGAAGGTGCG  
GGTAT

>ASV:971:Genus:Bacteroides

TACGGAAGGATCCGAGCGTTATCCGGATTTATTGGGTTAAAGGGTGCCTAGGCGGACTGTTAAGTCAGCTGTGAAAGTTT  
GCGGCTCAACCGTAAATTCAGTTGAAACTGCCAGTCTTGTAGTGTACATGAGGTAGGCGGAATTCCTGGTGTAGCGGTG  
AAATGCTTAGATATACGAAGAACTCCGATTGCGTAGGCAGCTTACTAGGGTACAACCTGACGCTGAGGCACGAAAGTGTG  
GGTAT

>ASV:972:Genus:Acinetobacter

TACAGAGGGTGCAGCGTTAATCCGGATTTACTGGGCGTAAAGCGTACGTAGGTGGTCTTTAAGTCGGATGTGAAATCCC  
TGAGCTTAACCTAGGAATTGCATTGATACTGGGAGACTAGAGTATGGGAGAGGATGGTAGAATTCAGGTGTAGCGGTG  
AAATGCGTAGAGATCTGGAGGAATACCGATTGCGAAGGCAGCCATCTGGCCTAATACTGACACTGAGGTACGAAAGCATG  
GGGAG

>ASV:973:Family:Lachnospiraceae

TACGTAGGGGCGAAGCGTTATCCGGATTTACTGGGTGTAAGGGGAGCGTAGACGGAAGTCAAGTCTGATGTGAAAACCC  
GAGGCTCAACACCGGACTGCATTGAAACTGTGCTTCTAGAGTGCAGGAGAGGTAAGCGGAATTCCTAGTGTAGCGGTG  
AAATGCGTAGATATTAGGAGGAACACCAGTGGCGAAGGCGGCTTACTGGACGTTAAGTACGCTTGGAGCTCGAAAGCGTG  
GGGAG

>ASV:974:Genus:Alistipes

TACGGAAGGATCAAGCGTTATCCGGATTTATTGGGTTAAAGGGTGCCTAGGCGGTTTAGTAAGTCAGCGGTGAAATTTT  
GGTGCTCAACACCAACCGTGCCTGATACTGCTGAGCTAGAGAGTAGTTGCGGTAGGCGGAATGTATGGTGTAGCGGTG  
AAATGCTTAGAGATCATACAGAACACCAGATTGCGAAGGCAGCTTACCAAACTATATCTGACGTTGAGGCACGAAAGCGTG  
GGGAG

>ASV:975:Genus:Alistipes

TACGGAAGGATCAAGCGTTATCCGGATTTATTGGGTTAAAGGGTGCCTAGGCGGTTTGTATAAGTTAGAGGTGAAATTTT  
GGAGCTCAACCTGAACTGCCTCTAATACTGTTGAGCTAGAGAGTAGTTGCGGTAGGCGGAATGTATGGTGTAGCGGTG  
AAATGCTTAGAGATCATACAGAACACCAGATTGCGAAGGCAGCTTACCAAACTATATCTGACGTTGAGGCACGAAAGCGTG  
GGGAG

>ASV:976:Genus:Family\_XIII\_AD3011\_group

TACGTAGGGGCGAAGCGTTATCCGGATTTATTGGGCGTAAAGGGTACGTAGGTGGTTACCTAAGCACAGGGTATAAGGCA  
ATAGCTTAACCTATTGTTCCGCTTGTGAACTGGGCTACTTGTAGTGCAGGAGAGGAAAGCGGAATTCCTAGTGTAGCGGTG  
AATGCGTAGATATTAGGAGGAACACCAGTGGCGAAGGCGGCTTCTGGACTGTAAGTACACTGAGGTACGAAAGCGGTG  
GGAGC

>ASV:977:Genus:Lachnospiraceae\_NK4A136\_group

TACGTAGGGGCGAAGCGTTATCCGGATTTACTGGGTGTAAGGGGAGCGTAGACGGTGAAGCAAGTCTGAAGTGAAGGTT



GGGGCTCAACCCGAAACTGCTTTGGAACTGTTAACTGGAGTACAGGAGAGGTAAGTGAATTCCTAGTGTAGCGGTG  
AAATGCGTAGATATTAGGAGGAACACCAGTGGCGAAGGCGGCTTACTGGACTGTAACGTGACGTTGAGGCTCGAAAGCGTG  
GGGAG  
>ASV:978:Species:beijerinckii/sartagoforme/tertium  
TACGTAGGTGGCGAGCGTTGTCCGGATTTACTGGGCGTAAAGGGAGCGTAGGCGGATTTTTAAGTGAGATGTGAAATACC  
CGGGCTCAACTTGGGTGCTGCATTTCAAACCTGGAAGTCTAGAGTGCAGGAGAGGAGAGTGAATTCCTAGTGTAGCGGTG  
AAATGCGTAGAGATTAGGAAGAACACCAGTGGCGAAGGCGACTCTCTGGACTGTAACGTGACGCTGAGGCTCGAAAGCGTG  
GGGAG  
>ASV:979:Genus:Ruminiclostridium\_9  
TACGTAGGGAGCAAGCGTTATCCGGATTTACTGGGTGTAAGGGCGGTAGGCGGGACTGCAAGTCAGATGTGAAAACCTA  
TGGGCTTAACCCATAGCCTGCATTTGAAACTGTAGTTCTTGAGTGGTGGAGAGGCAAATGGAATTCCTAGTGTAGCGGTG  
AAATGCGTAGATATTAGGAAGAACACCAGTGGCGAAGGCGATTTGCTGGACACTAACGTGACGCTGAGGCGCAAAGCGTG  
GGGAG  
>ASV:980:Species:delbrueckii/fermentum/ingluviei/oris/parabuchneri/plantarum  
TACGTAGGTGGCAAGCGTTATCCGGATTTATTGGGCGTAAAGAGAGTGCAGGCGTTTTCTAAGTCTGATGTGAAAGCCT  
TCGGCTTAACCGGAGAAGTGCATCGGAAACTGGATAACTTGAGTGCAGAAGAGGGTAGTGAACCTCCATGTGTAGCGGTG  
GAATGCGTAGATATATGGAAGAACACCAGTGGCGAAGGCGGCTACCTGGTCTGCAACTGACGCTGAGACTCGAAAGCATG  
GGTAG  
>ASV:981:Genus:Shuttleworthia  
TACGTATGGAGCAAGCGTTATCCGGATTTACTGGGTGTAAGGGAGCGTAGGCGGTCTTATAAGTCTGATGTGAAAGCCC  
GGGGCTCAACCCGGGACTGCATTTGAAACTGTAGGACTAGAGTGTGCGAGGGGTAAGTGAATTCCTAGTGTAGCGGTG  
AAATGCGTAGATATTAGGAGGAACACCAGTGGCGAAGGCGGCTTACTGGACGATTACTGACGCTGAGGCTCGAAAGCGTG  
GGGAG  
>ASV:982:Genus:Ruminococcaceae\_UCG-005  
TACGTAGGGAGCGAGCGTTGTCCGGATTTACTGGGTGTAAGGGCGGTAGGCGGAGCTGCAAGTCAGATGTGAAATCTG  
GGGGCTTAACCCCAAACCTGCATTTGAAACTGTAGCCCTTGAGTATCGGAGAGGCGAGGCGGAATTCCTAGTGTAGCGGTG  
AAATGCGTAGATATTAGGAGGAACACCAGTGGCGAAGGCGGCTGCTGGACGACAACGTGACGCTGAGGCGCAAAGCGTG  
GGGAG  
>ASV:983:Order:Mollicutes\_RF39  
TACGTAGGGAGCGAGCGTTATCCGGAAATTATTGGGTGTAAGCGTGTGTAGGCGGTAATTAAGTCTAAGGTATAAGCCC  
GGAGCTTAACCTCGGTTTCGCTTAGAAACTGATTTTCTTGAGTGTGGTAGAGGCAAGCGGAATTTCTAGTGTAGCGGTAA  
AATGCGTAGATATTAGAAGGAACACCAGTGGCGAAGGCGGCTTCTGGGCCAAAACGTGACGCTGAGACACGAAAGCGTGG  
GGAGC  
>ASV:984:Class:Clostridia  
TACGTAGGGGGCGAGCGTTGTCCGGAAATTACTGGGCGTAAAGGGTGCCTAGGCGGCAATTTAAGTTGGATGTGAAATACC  
CGGGCTTAACCTGGGGGTGCATTTCAAACCTGGATAGCTAGAGTACAGGAGAGGGAAGCGGAATTCCTAGTGTAGCGGTG  
AAATGCGTAGATATTAGGAGGAACACCAGTGGCGAAGGCGGCTTCTGGACTGAAACGTGACGCTGAGGCGCAAAGCGTG  
GGGAG  
>ASV:985:Genus:Ruminococcaceae\_UCG-013  
TACGTAGGTGGCGAGCGTTGTCCGGATTTACTGGGTGTAAGGGCGGTAGGCGGGACTGCAAGTCAGATGTGAAATACC  
GGGGCTTAACCCGGGGCTGCATTTGAAACTGCGGTTCTTGAGTGCGGGAGAGGAAAGCGGAATTCCTAGTGTAGCGGTG  
AAATGCGTAGATATTAGGAGGAACACCAGTGGCGAAGGCGGCTTCTGGACCCTAAGTACGCTGAGGCGCAAAGCGTG  
GGTAG  
>ASV:986:Genus:Klebsiella  
TACGGAGGGTCAAGCGTTAATCCGGAATTACTGGGCGTAAAGCGCACGCAGGCGGTCTGTCAAGTCCGATGTGAAATCCC  
CGGGCTCAACCTGGAACTGCATTCGAAACTGGCAGGCTGGAGTCTTGATAGAGGGGGTAGAATTCAGGTGTAGCGGTG  
AAATGCGTAGAGATCTGGAGGAATACCAGTGGCGAAGGCGGCCCTTGACAAAGACTGACGCTCAGGTGCGAAAGCGTG  
GGGAG  
>ASV:987:Genus:Mogibacterium  
TACGTAGGGGGCAAGCGTTATCCGGAAATTATTGGGCGTAAAGAGTGCCTAGGTGTTATCTAAGCGTAAGGTTAAGCGT  
GCAGCTCAACTGCATCTCGCTTCCGAACTGGACTACTTGAGTGCAGGAGGGGAAAGCGGAATTCCTAGTGTAGCGGTG  
AATGCGTAGATATTAGGAGGAACACCAGTGGCGAAGGCGGCTTCTGGACTGTAACGTGACACTGAGGCGCAAAGCGTGG  
GGAGC  
>ASV:988:Order:Clostridiales  
TACGTAGGGGGCGAGCGTTGTCCGGAAATTACTGGGCGTAAAGGGCGCGTAGGCGGCATATTAAGTTAGATGTGAAATCCC  
CGGGCTTAACCTGGGTGTTGCATTTAAACCTGATAAGCTTGAGTGCAGGAGAGGGAAGCGGAATTCCTAGTGTAGCGGTG  
GAATGCGTAGATATTAGGAGGAACACCAGTGGCGAAGGCGGCTTCTGGACTGTAACGTGACGCTGAGGCGCGAGAGCGTG  
GGGAG  
>ASV:989:Order: Bacillales  
TACGTAGGTGGCAAGCGTTGTCCGGAAATTATTGGGCGTAAAGCGCGCGCAGGCGGTCTCTTAAGTCTGATGTGAAAGCCC  
ACGGCTCAACCTGGAGGGTCAATTGGAAACTGGGGACTTGAGTGCAGAAGAGGAAAGTGAATTCACGTGTAGCGGTG  
AAATGCGTAGAGATGTGGAGGAACACCAGTGGCGAAGGCGACTTCTGGTCTGTAACGTGACGCTGAGGCGCAAAGCGTG  
GGGAG  
>ASV:990:Species:taiwanensis  
TACGAAGGGTGAAGCGTTACTCGGAATTACTGGGCGTAAAGCGTGCCTAGGTGGTGGCTTAAGTCCGTTGTGAAAGCCC  
TGGGCTCAACCTGGGAATTGCAGTGGATACTGGGTCACTAGAGTGTGGTAGAGGGTGGCGGAATTCCTGGTGTAGCAGTG  
AAATGCGTAGAGATCGGGAGGAACACCCTGGCGAAGGCGGCCACTGGGCCAACACTGACACTGAGGCGCAAAGCGTG  
GGGAG

>ASV:991:Species:distasonis  
TACGGAGGATCCGAGCGTTATCCGGATTTATTGGGTTTAAAGGGTGCCTAGGCGGCCTTTTAAAGTCAGCGGTGAAAAGTCT  
GTGGCTCAACCATAGAATTGCCGTTGAAACTGGGGGGCTTGGATATGTTTGGAGCAGCGGAATGCGTGGTGTAGCGGTG  
AAATGCATAGATATCACGAGAACCCCGATTGCGAAGGCAGCCTGCCAAGCCATTACTGACGCTGATGACGAAAGCGTG  
GGGAT

>ASV:992:Genus:Prevotella\_2  
TACGGAAGGTCCGGGCGTTATCCGGATTTATTGGGTTTAAAGGGAGCGTAGGCGCTCTGGTAAGCGTGTGTGAAATGT  
GGGGCTCAACCCCGGACTGCATTGAAACTGTCTAGCTAGAGTGCAGGAGAGGTAAGTGGAAATTCCTAGTGTAGCGGTG  
AAATGCTTAGATATGACGAAGAACTCCGATTGCGAAGGCAGCCTGCTGTAGCGCAACTGACGCTGAAGCTCGAAAGCGTG  
GGTAT

>ASV:993:Species:prausnitzii  
AACGTAGGTCAACAGCGTTGTCCGGAATTACTGGGTGTAAGGGAGCGCAGGCGGGAAGACAAGTTGGAAGTGAATCCA  
TGGGCTTAACCCCATGAATGCTTTCAAACCTGTTTTCTTGGTGTAGTGCAGAGGTAGCGGAAATTCCTAGTGTAGCGGTG  
GAATGCGTAGATATCGGAGGAACACCAGTGGCGAAGGCGGCTACTGGCACCAACTGACGCTGAGGCTCGAAAGTGTG  
GGTAG

>ASV:994:Family:Lachnospiraceae  
TACGTAGGGGGCAAGCGTTATCCGGATTTACTGGGTGTAAGGGAGCGTAGGTGGCAAGGCAAGTCAGATGTGAAAACCC  
GGGGCTTAACCCCGGACTGCATTGAAACTGTCTAGCTAGAGTGCAGGAGAGGTAAGTGGAAATTCCTAGTGTAGCGGTG  
AAATGCATAGATATTAGGAGGAACACCAGTGGCGAAGGCGGCTTACTGGACTGTAAGTACACTGAGGCTCGAAAGCGTG  
GGGAG

>ASV:995:Genus:Lachnospiraceae\_NK4A136\_group  
TACGTAGGGGGCAAGCGTTATCCGGATTTACTGGGTGTAAGGGAGCGTAGACGGTTTTGCAAGTCTGAAGTGAAGGCC  
GGGGCTTAACCCCGGACTGCATTGAAACTGTAGGACTAGAGTGCAGGAGAGGTAAGTGGAAATTCCTAGTGTAGCGGTG  
AAATGCGTAGATATTAGGAGGAACACCAGTGGCGAAGGCGGCTTACTGGACTGTAAGTACACTGAGGCTCGAAAGCGTG  
GGGAG

>ASV:996:Family:Lachnospiraceae  
TACGTAGGGGGCAAGCGTTATCCGGATTTACTGGGTGTAAGGGAGCGTAGACGGCGAGGCAAGTCTGATGTGAAAAGCT  
GGGGCTTAACCCCGGACTGCATTGAAACTGCTTTGCTGGAGTGCAGGAGAGGTAAGCGGAAATTCCTAGTGTAGCGGTG  
AAATGCGTAGATATTAGGAGGAACACCAGTGGCGAAGGCGGCTTACTGGACTGTAAGTACACTGAGGCTCGAAAGCGTG  
GGGAG

>ASV:997:Family:Family\_XIII  
TACGTAGGGGGCAAGCGTTATCCGGATTTACTGGGTGTAAGGGTACGTAGGTGGTTTTCTAAGCGCAGGGTATAAGGCA  
ATGGCTTAACCATTTGTCGCTTGGCAACTGGGGACTTGGTGTAGTGCAGGAGAGGAAAGCGGAAATTCCTAGTGTAGCGGTG  
AATGCGTAGATATTAGGAGGAACACCAGTGGCGAAGGCGGCTTCTGGACTGTAAGTACACTGAGGTACGAAAGCGTG  
GGAGC

>ASV:998:Genus:Moheibacter  
TACGGAGGGTGCAGCGTTATCCGGATTTACTGGGTGTAAGGGTCCGAGGCGGGCTTGTAAAGTCAAGGTTGAAAAGCCG  
ACAGCTTAACCTGTCGAAGTGCCTTTGATACTGCAAGTCTTGGTGTAGTGCAGGTTGAAAGTACTGGAATGTGTAGTGTAGCGGTG  
AAATGCTTAGATATTACAGAAACACCAGTGGCGAAGGCGGCTTACTAAGTCTTAAGTACACTGAGGCTGAGGACGAAAGCGTG  
GGGAG

>ASV:999:Genus:Ruminococcaceae\_UCG-009  
TACGTAGGTGGCAAGCGTTATCCGGATTTACTGGGTGTAAGGGGCGAGTAGGCGGGATTGCAAGTCAAGTGTGAAAAGTCA  
TGGGCTCAACCCATAGACTGCATTTGAAACTGTAGTCTTGGTGTAGTGCAGGAGGCGAGGCGGAAATTCCTAGTGTAGCGGTG  
GAATGCGTAGATATCGGAGGAACACCAGTGGCGAAGGCGGCTTCTGGACTTAACTGACGCTGAGGCGGAAAGCGTG  
GGGAG

>ASV:1000:Genus:Bifidobacterium  
TACGTAGGGTGCAGCGTTATCCGGATTTACTGGGTGTAAGGGCTCGTAGGCGGTTCTGTCGCTCTGGTGTGAAAAGTCC  
ATCGCTTAACCGTGGATCCGCGCGGGTACGGGCGGGCTTGGTGTAGTGCAGGTTGAGGCGAGGCGGAAATTCCTAGTGTAGCGGTG  
GAATGCTTAGATATCGGGAAGAACACCAGTGGCGAAGGCGGCTTCTGGGCTTCACTGACGCTGAGGACGAAAGCGTG  
GGGAG

>ASV:1001:Genus:Bacteroides  
TACGGAGGATCCGAGCGTTGTCCGGATTTATTGGGTTTAAAGGGAGCGTAGATGGATGTTTAAAGTCAAGTGTGAAAAGTTC  
GCGGCTCAACCGTAAAATTGCAAGTGTACTGGATATCTTGGTGTAGTGCAGTGGAGGCGGAAATTCCTAGTGTAGCGGTG  
AAATGCTTAGATATCACGAAGAACTCCGATTGCGAAGGCAGCCTGCTAAGTGCACACTGACATTGAGGCTCGAAAGTGTG  
GGTAT

>ASV:1002:Genus:Blautia  
TACGTAGGGGGCAAGCGTTATCCGGATTTACTGGGTGTAAGGGAGCGTAGACGGATTAGCAAGTCTGATGTGAAAAGGCA  
GGGGCTCAACCCCTGGACTGCATTGAAACTGCCAGTCTTGGTGTAGTGCAGGAGAGGTAAGCGGAAATTCCTAGTGTAGCGGTG  
AAATGCGTAGATATTAGGAGGAACACCAGTGGCGAAGGCGGCTTACTGGACTGTAAGTACACTGAGGCTCGAAAGCGTG  
GGGAG

>ASV:1003:Genus:Holdemanella  
TACGTAGGTGGCAGCGTTATCCGGATTTACTGGGTGTAAGGGTGCCTAGGTGGCAGAACAAAGTCTGGAGTAAAAGGTA  
TGGGCTCAACCCGACTGGCTCTGAAACTGTTGAGTGCAGGAGCAGAAAGAGGACGGCGGAACTCCATGTGTAGCGGTAA  
AATGCGTAGATATGGAAGAACACCAGTGGCGAAGGCGGCTTCTGGTCTGTTGCTGACACTGAAGCACGAAAGCGTG  
GGAGC

>ASV:1004:Species:wadsworthensis  
TACGTAGGGTGCAGCGTTAATCCGGAATTACTGGGCTAAAGCGTGCAGGCGGTTCTGTAAGACAGATGTGAAATCCC  
CGGGCTTAACCTGGGAATTGCATTTGACTGCAGGACTAGAGTTCATCAGAGGGGGTGGAAATTCGAAGTGTAGCAGT

AAATGCGTAGATATTTGGAAGAACACCAATGGCGAAGGCAGCCCCCTGGGATGCGACTGACGCTCATGCACGAAAGCGTG  
GGGAG  
>ASV:1005:Species:corporis  
TACGGAAGGTCGGGCGTTATCCGGATTTATTGGGTTTAAAGGGAGTGTAGGCGGCCTGTTAAGCGTGTGTGAAATGTA  
GATGCTCAACATCTGAAGTGCAGCGCAACTGGCTGGCTTGGAGTACACGCAACGTGGGCGGAATTCATGGTGTAGCGGTG  
AAATGCTTAGATATCATGAGGAACCTATTGCGAAGGCAGCTCACGGGAGTGTCACTGACGCTTAAGCTCGAAGGTGCG  
GGTAT  
>ASV:1006:Genus:Bifidobacterium  
TACGTAGGGCGCAAGCGTTATCCGGATTTATTGGGCGTAAAGGGCTCGTAGGCGGCTCGTCGCCTCCGGTGTGAAAGTCC  
ATCGCTTAACGGTGGATCTGCGCCGGGTACGGGCGGGCTGGAGTGCGGTAGGGGAGACTGGAATTCCTGGTGTAAACGGTG  
GAATGTGTAGATATCGGGAAGAACACCGATGGCGAAGGCAGTCTCTGGGCCGTCACTGACGCTGAGGAGCGAAAGCGTG  
GGGAG  
>ASV:1007:Genus:Bifidobacterium  
TACGTAGGGTGAAGCGTTATCCGGAATTTATTGGGCGTAAAGGGCTCGTAGGCGGTTCTGTCGCTCCGGTGTGAAAGTCC  
ATCGCTTAACGGTGGATCTGCGCCGGGTACGGGCGGGCTGGAGTGCGGTAGGGGAGACTGGAATTCCTGGTGTAAACGGTG  
GAATGTGTAGATATCGGGAAGAACAGCAATGGCGAAGGCAGTCTCTGGGCCGTTACTGACGCTGAGGAGCGAAAGCGTG  
GGGAG  
>ASV:1008:Genus:Staphylococcus  
TACGTAGGTGGCAAGCGTTATCCGGAATTTATTGGGCGTAAAGCGCGCTAGGCGGTTTTTTAAGTCTGATGTGAAAGGCC  
ACGGCTCAACCGTGGAGGGTCAATTGAAACTGAAAACCTTGGGTGCAGAAGAGGAAAGTGAATTCATGTGTAGCGGTG  
AAATGCGCAGAGATATGGAGGAACACCAAGTGGCGAAGGCAGCTTCTGGTCTGTAAGTACGCTGATGTGCGAAAGCGTG  
GGAT  
>ASV:1009:Species:jalaludinii  
TACGTAGGTGGCAGCGTTGTCCGGAATTTATTGGGCGTAAAGGGAGCGCAGGCGGGAAGTAAAGTCTATCTTAAAAGTGC  
GGGGCTCAACCCCGTGAAGGGATGAAACTATCTTTCTTGGTGCAGGAGAGGAAAGCGGAATTCCTAGTGTAGCGGTGA  
AATGCGTAGATATTAGGAGGAACACCAAGTGGCGAAGGCAGCTTCTGGACTGTAAGTACGCTGAGGCTCGAAAGCGTG  
GGAGC  
>ASV:1010:Family:Ruminococcaceae  
TACGTAGGTGGCAAGCGTTGTCCGGAATTTACTGGGTGTAAGGGAGCGTAGGCGGGAAGATAAGTTGGACGTTTAACTA  
TCGGCTCAACCGATATCAGCGTTCAAACCTGTTTTCTTGGTGAAGTAGAGGTAAGCGGAATTCCTAGTGTAGCGGTGA  
AATGCGTAAATATTAGGAGGAACACCAAGTGGCGAAGGCAGCTTACTGGGCTTAACTGACGCTGAGGCTCGAAAGCGTG  
GTAGC  
>ASV:1011:Genus:Faecalibacterium  
AACGTAGGTCAACAGCGTTGTCCGGAATTTACTGGGTGTAAGGGAGCGCAGGCGGGAAGACAAGTTGGAAGTGAATCTA  
TGGGCTCAACCCATAAACTGCTTTTAAAACCTGTTTTCTTGGTGAAGTAGAGGTAAGCGGAATTCCTGGTGTAGCGGTG  
GAATGCGTAGATATCGGAGGAACACCAAGTGGCGAAGGCAGCTTACTGGGCACCAACTGACGCTGAGGCTCGAAAGGTG  
GGTAG  
>ASV:1012:Genus:Lachnospiraceae\_NK4A136\_group  
TACGTAGGGGGCAAGCGTTATCCGGATTTACTGGGTGTAAGGGAGCGTAGACGGTGAAGCAAGTCTGAAGTGAATGCC  
GGGGCTCAACCCCGGAACTGCTTTGAAACTGTCTGACTAGAGTGCAGGAGAGGTAAGTGAATTCCTAGTGTAGCGGTG  
AAATGCGTAGATATTAGGAGGAACACCAAGTGGCGAAGGCAGCTTACTGGACTGTAAGTACGCTTGAAGGCTCGAAAGCGTG  
GGGAG  
>ASV:1013:Species:ureilytica  
TACGTATGGGGCAAGCGTTATCCGGAATTTACTGGGTGTAAGGGAGTGTAGGCGGCAGTACAAGTCAAGTCAAGTGAAGTCT  
GGGGCTCAACCCCAAGACTGCTTTTAAAACCTGTACAGCTAGAGTGTAGGAAGGGCAAGCGGAATTCCTGGTGTAGCGGTG  
AAATGCGTAGATATCAGGAAGAACACCGGTGGCGAAGGCAGCTTGTGGACTATAACTGACGCTGAGACTCGAAAGCGTG  
GGGAG  
>ASV:1014:Species:arsenatis/rhizophila/salsicia  
TACGTAGGGCGCAAGCGTTGTCCGGAATTTATTGGGCGTAAAGAGCTCGTAGGCGGTTTGTCCGCTCTGCTGTGAAAGGCC  
GGGGCTTAACCCCGGTGTGCAAGTGGGTACGGGCAGACTTGAAGTGCAGTAGGGGAGACTGGAATTCCTGGTGTAGCGGTG  
AAATGCGCAGATATCAGGAGGAACACCGATGGCGAAGGCAGTCTCTGGGCTGTTACTGACGCTGAGGAGCGAAAGCATG  
GGGAG  
>ASV:1015:Genus:Parabacteroides  
TACGGAGGATCCGAGCGTTATCCGGATTTATTGGGTTTAAAGGGTGCCTAGGCGGCCTTTTAAAGTCAAGCGGTGAAAGTCT  
GTGGCTCAACCATAGAAATGCGGTTGAAACTGGGGGCTTGAAGTATGTTTGAAGCAGGCGGAATGCGTGGTGTAGCGGTG  
AAATGCATAGATATCACGAGAACCCGATTCGGAAGGCAGCTTACTGGATTGTAAGTACGCTGATGCTCGAAAGTGTG  
GGTAT  
>ASV:1016:Genus:Bacteroides  
TACGGAGGATCCGAGCGTTATCCGGATTTATTGGGTTTAAAGGGAGCGTAGATGGATGTTTAAAGTCAAGTGTGAAAGTCT  
GCGGCTCAACCGTAAATGCAAGTGTACTGGATATCTTGAAGTGCAGTTGAGGCAGGCGGAATTCGTGGTGTAGCGGTG  
AAATGCTTAGATATCACGAAGAACTCCGATTCGGAAGGCAGCTGCTAAGCTGCAACTGACAGTGAAGGCTCGAAAGTGTG  
GGTAT  
>ASV:1017:Genus:Holdemania  
TACGTAGGTGGCAAGCGTTATCCGGAATTTATTGGGCGTAAAGGGTGCAGGCGGTTTTTTAAGTTTAAAGTGAAGCGT  
GGGGCTTAACCCCATATAGCCTTAGAAACTGGGAGACTGGAGTGCAGGAGAGGGCAATGGAATTCATGTGTAGCGGTAA  
AATGCGTAGATATATGGAGGAACACCAAGTGGCGAAGGCAGCTTGCCTGGCCTGTAAGTACGCTGAGGACGAAAGCGTG  
GGAGC  
>ASV:1018:Genus:Parabacteroides

TACGGAGGATCCGAGCGTTATCCGGATTTATTGGGTTAAAGGGTGCCTAGGCGGCCTTTAAGTCAGCGGTGAAAAGTCT  
GTGGCTCAACCATAGAAATTGCCGTTGAAACTGGGGGCTTGGATGTTTGGAGGAGCGGGAATGCGTGGTGTAGCGGTG  
AAATGCGTAGATATCACGCAGAACCCCGATTGCCAAGGCAGCTGCTAGGGTAAAACAGACGCTGAGGCACGAAAGCGTG  
GGTAT

>ASV:1019:Family:Ruminococcaceae

TACGTAGGGAGCGAGCGTTGTCCGGATTTACTGGGTGTAAGGGTGCCTAGGCGGGATGGCAAGTCAGATGTGAAATACC  
GGGGCTCAACTCCGGAGCTGCATTTGAAACTGTCGTTCTTGGTGAAGTAGAGGCAGGCGGAATTCCTAGTGTAGCGGTG  
AAATGCGTAGATATTAGGAGGAACACCAGTGGCGAAGGCGGCTGCTGGGCTTAACTGACGCTGAGGCACGAAAGCATG  
GGGAG

>ASV:1020:Family:Lachnospiraceae

TACGTATGGGGCAAGCGTTATCCGGATTTACTGGGTGTAAGGGAGCGTAGGCGGCATGACAAGTCAGAAGTAAAAGCCT  
GGGGCTCAACCCGGAATTGCTTTTAAACTGTCAGGCTAGAGTGTCCGAGGGGTAAGCGGAATTCCTAGTGTAGCGGTG  
AAATGCGTAGATATTAGGAGGAACACCAGTGGCGAAGGCGGCTTACTGGACGATTACTGACGCTGAGGCTCGAAAGCGTG  
GGGAG

>ASV:1021:Genus:Agathobacter

TACGTATGGAGCAAGCGTTATCCGGATTTACTGGGTGTAAGGGAGCGTAGGCGGTTCTGCAAGTCTGATGTGAAAGGCC  
GGGGCTCAACCCGGGACTGCATTGAAACTGTAGGACTAGAGTGTCCGAGGGGTAAGTGAATTCCTAGTGTAGCGGTG  
AAATGCGTAGATATTAGGAGGAACACCAGTGGCGAAGGCGGCTTACTGGACGACTACTGACGCTGAGGCTCGAAAGCGTG  
GGGAG

>ASV:1022:Genus:Paenibacillus

TACGTAGGGGGCAGCGTTGTCCGGAATTTATTGGGCGTAAAGCGCGCAGGCGGCTGTTAAGTCTGGTGTAAATCCT  
GGGGCTCAACCCAGGTCGCACTGGAACTGGACGGCTTGGTGCAGAAGAGGAGAGTGAATTCACGCTGTAGCGATGA  
AATGCGTAGAGATGTGGAGGAACACCAGTGGCGAAGGCGACTCTCTGGGCTGTAAGTACGCTAAGGCGCGAAAGCGTG  
GGAGC

>ASV:1023:Genus:Ruminococcaceae\_UCG-014

TACGTAGGGAGCGAGCGTTATCCGGAATTTATTGGGTGTAAGGGTGCCTAGACGGGAGAACAAAGTTAGTTGTGAAATACC  
TCGGCTCAACTGAGGAAGTCAACTAAAAGTACTTCTTGGTGCAGGAGAGGTAAGTGAATTCCTAGTGTAGCGGTG  
AAATGCGTAGATATTAGGAGGAACACCAGTGGCGAAGGCGACTTACTGGACTGTAAGTACGCTTGAAGGCGCGAAAGCGTG  
GGGAG

>ASV:1024:Species:suis

TACGGAGGGTGCAAGCGTTACTCGGAATCACTGGGCGTAAAGAGCGTGTAGGCGGATATATAAGTCAGAAGTGAATCCA  
ATAGCTTAACATTGAAGTGCATTTTAAACTGTATATCTAGAATGTGGGAGAGGTAGATGGAATTCCTGGTGTAGCGGTG  
AAATCCGTAGAGATCAGAAGGAATACCGATTGCGAAGGCGATCTACTGGAACATTATTGACGCTGAGACGCGAAAGCGTG  
GGGAG

>ASV:1025:Genus:Lachnospiraceae\_UCG-010

TACGTAGGGGGCAGCGTTATCCGGAATTTACTGGGTGTAAGGGTGCCTAGGCGGCACGGCAAGTAAGATGTGAAAGCCC  
GAGGCTTAACCTCGGATTGCATTTTAAACTGCTGACTAGAGTACAGGAGAGGAAAGCGGAATTCCTAGTGTAGCGGTG  
AAATGCGTAGATATTAGGAAGAACACCAGTGGCGAAGGCGGCTTCTGGACTGAAACTGACGCTGAGGCACGAAAGCGTG  
GGGAG

>ASV:1026:Order:Mollicutes\_RF39

TACGTAGGGGGCAGCGTTATCCGATTTATTGGGCGTAAAGCGTGCCTAGACGGTTTTATTAAGTCCAGAATTAAGCCC  
GAGGCTTAACCTCGGTTTCGTTCTGGACTGCTAGACTAGAGTATGGTAGAGGCAAATGGAATTCCTAGTGTAGCGGTG  
AATGCGTAGATATTAGGAGGAACACCAGTGGCGAAGGCGGTTTCTGGGCCATTACTGACGTTGAGGTACGAAAGCGTGG  
GTAGC

>ASV:1027:Order:Mollicutes\_RF39

TACGTAGGTGGCGAGCGTTATCCGATTTATTGGGCGTAAAGGGTGCAGACGGTTTTATTAAGTCTAAAATCAAATCTT  
GGGGCTTAACCCATTTTCGTTTAAAGTCTGACTAGACTTGGTATGGTAGAGGCAAATGGAATTCCTAGTGTAGCGGTG  
AATGCGTAGATATTAGGAGGAACACCAGTGGCGAAGGCGATTTGCTGGGCCATTACTGACGTTGAGGTACGAAAGCGTGG  
GGAGC

>ASV:1028:Species:accolens/fastidiosum/macginleyi/segmentosum

TACGTAGGGTGCAGCGTTGTCCGGAATTTACTGGGCGTAAAGGGCTCGTAGGTGTTTGTCCGCTGCTGTGAAATTC  
GGGGCTTAACCTCGGCTGCAGGCGATACGGGCATAACTTGAAGTGTAGGGGTAAGTGAATTCCTAGTGTAGCGGTG  
GAAATGCGCAGATATCAGGAGGAACACCAGTGGCGAAGGCGGTTACTGGGCAGTTACTGACGCTGAGGAGCGAAAGCAT  
GGTA

>ASV:1029:Genus:Roseburia

TACGTATGGTCAAGCGTTATCCGATTTACTGGGTGTAAGGGAGCGCAGGCGGTGCGGCAAGTCTGATGTGAAAGCCC  
AGGGCTCAACCTCGGTTACTGCATTTGAAACTGTCGACTAGAGTGTCCGAGGGGTAAGCGGAATTCCTAGTGTAGCGGTG  
AAATGCGTAGATATTAGGAGGAACACCAGTGGCGAAGGCGGCTTACTGGACGATAACTGACGCTGAGGCTCGAAAGCGTG  
GGGAG

>ASV:1030:Genus:Lachnoclostridium

TACGTAGGGGGCAGCGTTATCCGATTTACTGGGTGTAAGGGAGCGTAGACGGCGAAGTAAGTCTGAAGTAAAAGCCC  
GGGGCTCAACCGCGGACTGCTTTGAAACTGTTTTGCTAGAGTGTGGAGAGGTAAGTGAATTCCTAGTGTAGCGGTG  
AAATGCGTAGATATTAGGAGGAACACCAGTGGCGAAGGCGGCTTACTGGACGATAACTGACGTTGAGGCTCGAAAGCGTG  
GGGAG

>ASV:1031:Genus:Faecalibacterium

AACGTAGGTCAAGCGTTGTCCGGAATTTACTGGGTGTAAGGGAGCGCAGGCGGGAAGATAAGTTGGAAGTAAAATCTA  
TGGGCTCAACCCATAAACTGCTTTCAAAGTGTTTTTCTTGGTGTAGTGCAGAGGTAGGCGGAATTCCTAGTGTAGCGGTG  
AATGCGTAGATATCCGGAGGAACACCAGTGGCGAAGGCGGCTTACTGGCACCAACTGACGCTGAGGCTCGAAAGTGTG

GGTAG  
>ASV:1032:Family:Lachnospiraceae  
TACGTAGGGGGCAAGCGTTATCCGGATTTACTGGGTGTAAGGGGAGCGTAGACGGCATGGCAAGTCTGAAGTAAAACCC  
GAGGCTCAACCACGGGATTGCTTTGGAACTGTCAAGCTTGAGTGCCGGAGAGGTAAGCGGAATTCCTAGTGTAGCGGTG  
AAATGCGTAGATATTAGGAGGAACACCAGTGGCGAAGGCGGCTTACTGGACGTAACGACGTTGAGGCTCGAAAGCGTG  
GGGAG  
>ASV:1033:Genus:Domibacillus  
TACGTAGGTGGCAAGCGTTATCCGGATTTACTGGGCGTAAAGCGCGCAGGCGGTTTCTTAAGTCTGATGTGAAAGCCC  
ACGGCTCAACCGTGAAGGTATTGGAACTGGGAGACTTGAGTGACAGAAAGAGAAGAGCGGAATTCACGTGTAGCGGTG  
AAATGCGTAGAGATGTGGAGGAACACCAGTGGCGAAGGCGGCTTTTGGTCTGTAACGACGTTGAGGCGCAAAGCGTG  
GGGAG  
>ASV:1034:Genus:Tyzzerella\_3  
TACGTAGGGAGCAAGCGTTGTCCGGATTTACTGGGTGTAAGGGTGCCTAGGCGGGTATGCAAGTCATATGTGAAATACC  
GGGGCTCAACTCCGGGCTGCATAAGAACTGTATATCTTGAGTACAGGAGAGGTAAGCGGAATTCCTAGTGTAGCGGTG  
AAATGCGTAGATATTAGGAGGAACACCAGTGGCGAAGGCGGCTTACTGGACTGAAACGACGCTGAGGCACGAAAGCGTG  
GGGAG  
>ASV:1035:Genus:Ruminococcaceae\_UCG-010  
TACGTAGGTGGCAAGCGTTATCCGGATTTACTGGGTGTAAGGGTGTGTAGGCGGGTTTGAAGTCTGATGTGAAATTA  
TGGGCTCAACCATAACCTGCGTCTGAACTACAGATCTTGAGAGTGGGAGAGGTAATGGAATTCCTAGTGTAGCGGTG  
AAATGCGTAGATATCCGGAGGAACACCAGTGGCGAAGGCGGCTTACTGGACCAACGACGCTGAGACACGAAAGCGTG  
GGGAG  
>ASV:1036:Genus:GCA-900066225  
TACGTAGGTGGCAAGCGTTGTCCGGATTTACTGGGTGTAAGGGGAGCGTAGGCGGAAAGCAAGTTGAATGTTAAACTA  
TCGGCTCAACCATAATCGGTTCAAACCTGTTTTCTTGAGTGAAGTAGAGGTAGGCGGAATTCCTAGTGTAGCGGTGA  
AATGCGTAGATATTAGGAGGAACACCAGTGGCGAAGGCGGCTTACTGGGCTTAACTGACGCTGAGGCTCGAAAGCGTG  
GTAGC  
>ASV:1037:Family:Prevotellaceae  
TACGGAAGGTCCAGGCGTTATCCGGATTTACTGGGTTAAAGGGGAGCGTAGGCGCCTTTTAAAGCGTGTGTGAAATGTA  
GGGGCTCAACCCTGCACTGCAGCGCAACTGGAGAGCTTGAGTACACAAAGTAGGCGGAATTCATGGTGTAGCGGTG  
AAATGCTTAGATATCATGAAGAACCCGATTGCGAAGGCAGCTTACTGGAGTGAACGACGCTGAAGCTCGAAAGCGCG  
GGTAT  
>ASV:1038:Species:atypica  
TACGTAGGGTGCAGCGTTAATCCGGATTTACTGGGCGTAAAGCGTGCAGGCGGTTTTGTAAGACAGGCGTAAATCCC  
CGGGCTCAACTGGGAATGGCGCTTGTGACTGCAAAGCTGGAGTGCCGAGAGGGGATGGAATTCCTAGTGTAGCAGTG  
AAATGCGTAGATATGCGGAGGAACACCAGTGGCGAAGGCAATCCCTGGGCTGCACTGACGCTCATGCACGAAAGCGTG  
GGGAG  
>ASV:1039:Genus:Ruminococcaceae\_UCG-013  
TACGTAGGTGGCGAGCGTTGTCCGGATTTACTGGGTGTAAGGGGCGCGTAGGCGGATGAGCAAGTCTGATGTGAAATACC  
GGGGCTTAACCCGGGCTGCATTTGAACTGTTACCTTGAGTGCCGAGAGGAAAGCGGAATTCCTAGTGTAGCGGTG  
AAATGCGTAGATATTAGGAGGAACACCAGTGGCGAAGGCGGCTTCTGGACGATAACGACGCTGAGGCGCAAAGTGTG  
GGGAG  
>ASV:1040:Genus:Butyricimonas  
TACGGGGATGCGAGCGTTATCCGGATTTATTGGGTTAAAGGGGCGCGTAGGCGGGACGTCAGTCAAGTCAAGCGTAAAGACT  
GCAGCTAAACTGTAGCAGCGGTTGAACTGGCGCCCTCGAGACGAGACGAGGGAGGCGGAACAAGTGAAGTAGCGGTGA  
AATGCATAGATACACTTGGAAACCCGATAGCGAAGGCAGCTTCCAGGCTCGTTCTGACGCTGATGCGCGAGAGCGGTG  
GTAGC  
>ASV:1041:Genus:Bacteroides  
TACGGAGGATCCGAGCGTTATCCGGATTTATTGGGTTAAAGGGGAGCGTAGGTGGATTGTTAAGTCAAGTGTGAAAGTTT  
GCGGCTCAACCGTAAAATTGCAAGTGAAGTGGCAATCTTGAGTACAGTAGAGGTGGGCGGAATTCGTGGTGTAGCGGTG  
AAATGCTTAGATATCAGGAAGAACTCCGATTGCGAAGGCAGCTCACTAGACTGCAACTGACACTGATGCTCGAAAGTGTG  
GGTAT  
>ASV:1042:Genus:Alistipes  
TACGGAGGATCAAGCGTTATCCGGATTTATTGGGTTAAAGGGTGCCTAGGCGGTTTGATAAGTTAGAGGTGAAATGCC  
GGTGCTTAACACCGGAAGTGCCTTAATACTGTTGAACTAGAGAGTAGTTGCGGTAGGCGGAATGTATGGTGTAGCGGTG  
AAATGCTTAGAGATACACGAACACCAGATTGCGAAGGCAGCTTACCAACTATATCTGACGTTGAGGCACGAAAGCGTG  
GGGAG  
>ASV:1043:Family:Lachnospiraceae  
TACGTAGGGGGCAAGCGTTATCCGGATTTACTGGGTGTAAGGGGAGCGTAGGCGGCATGGCAAGCCAGATGTGAAAGGCC  
GGGGCTCAACCCGGGACTGCATTTGAACTGTCAGGCTTGAGTGTGGAGAGGTAAGCGGAATTCCTAGTGTAGCGGTG  
AAATGCGTAGATATTAGGAGGAACACCAGTGGCGAAGGCGGCTTACTGGACAATAACGACGCTGAGGCTCGAAAGCGTG  
GGGAG  
>ASV:1044:Genus:Bacteroides  
TACGGAGGATCCGAGCGTTATCCGGATTTATTGGGTTAAAGGGGAGCGTAGGTGGATTGTTAAGTCAAGTGTGAAAGTTT  
GCGGCTCAACCGTAAAATTGCAAGTGAAGTGGCAGTCTTGAGTACAGTAGAGGTGGGCGGAATTCGTGGTGTAGCGGTG  
AAATGCTTAGATATCAGGAAGAACTCCGATTGCGAAGGCAGCTCACTAGACTGTTGCTGACACTGATGCTCGAAAGTGTG  
GGTAT  
>ASV:1045:Genus:Roseburia  
TACGTATGGTCAAGCGTTATCCGGATTTACTGGGTGTAAGGGGAGCGAGGCGGTACGGCAAGTCTGATGTGAAAGCCC

GGGGCTCAACCCGGTACTGCATTGAAACTGCCGGACTAGAGTGTCGGAGGGTAAGTGAATTCCTAGTGTAGCGGTG  
AAATGCGTAGATATTAGGAGGAACACCAGTGGCGAAGGCGGCTTACTGGACGATTACTGACGCTGAGGCTCGAAAGCGTG  
GGGAG

>ASV:1046:Genus:Bacteroides

TACGGAGGATCCGAGCGTTATCCGGATTTATTGGGTTAAAGGGAGCGTAGGTGGATTGTTAAGTCAGTTGTGAAAGTTT  
ACGGCTCAACCGTAAAATTGCAGTTGAAACTGGCAGCTTTAGTACAGTAGAGGTGGCGGAATTCGTGGTGTAGCGGTG  
AAATGCTTAGATATCACGAAGAACTCCGATTGCGAAGGCAGCTCACTAGACTGCAACTGACACTGATGCTCGAAAGTGTG  
GGTAT

>ASV:1047:Species:aeruginosa/alcaligenes/alcaliphila/asplenii/cf./chengduensis/composti/  
cuatrocieneegasensis/fluorescens/fuscovaginae/guguanensis/indoloxydans/jessenii/knackmussii/  
mendocina/monteilii/nitroreducens/oleovorans/pseudoalcaligenes/putida/sihuiensis/toyotomiensis/  
trautweinii

TACGAAGGGTGCAAGCGTTAATCGGAATTACTGGGCGTAAAGCGCGCTAGGTGGTTGTTAAGTTGGATGTGAAAGCCC  
CGGGCTCAACCTGGGAAGTGCATCCAAAAGTGGCAGCTAGAGTACGGTAGAGGGTGGTGAATTCCTGTGTAGCGGTG  
AAATGCGTAGATATAGGAAGGAACACCAGTGGCGAAGGCGACCACTGGACTGATACTGACACTGAGGTGCGAAAGCGTG  
GGGAG

>ASV:1048:Genus:Sphingomonas

TACGGAGGGGCTAGCGTTTTCGGAATTACTGGGCGTAAAGCGCACGTAGGCGGCTTTGCAAGTTAGAGGTGAAAGCCT  
GGAGCTCAACTCCAGAATTGCCTTTAAGACTGCAGGGCTAGAATCCAGGAGAGGTGAGTGAATTCGAGTGTAGAGGTG  
AAATTCGTAGATATTCGGAAGAACACCAGTGGCGAAGGCGGCTCACTGGACTGGTATTGACGCTGAGGTGCGAAAGCGTG  
GGGAG

>ASV:1049:Genus:Prevotella\_9

TACGGAAAGTCCGGGCGTTATCCGGATTTATTGGGTTAAAGGGAACGTAGGCCGAGATTAAGCGTGTGTGAAATGTA  
GACGCTCAACGTCTGCACTGCAGCGCAACTGGTTTCCTTGAAGTACGCACAAAGTGGCGGAATTCGTGGTGTAGCGGTG  
AAATGCTTAGATATCACGAAGAACTCCGATTGCGAAGGCAGCTCACTGGAGCGCAACTGACGCTGAAGCTCGAAAGTGC  
GGTAT

>ASV:1050:Genus:Lachnospiraceae\_FCS020\_group

TACGTAGAGGGCAAGCGTTATCCGGATTTACTGGGTGTAAGGGAGCGTAGACGGCTTTGCAAGTCTGACGTGAAACTCC  
GGGGCTCAACTCCGGAAGTGCCTTGGAACTGTAAGGCTTGAAGTGCAGGAGAGGTAAGCGGAATTCCTAGTGTAGCGGTG  
AAATGCGTAGATATTAGGAGGAACACCAGTGGCGAAGGCGGCTTACTGGACGGCAACTGACGTTGAGGCTCGAAAGCGTG  
GGGAG

>ASV:1051:Species:haemolysans/morbillosum/parahaemolysans/sanguinis/taiwanensis

TACGTAGGTGGCAAGCGTTTCCGGAATTTATTGGGCGTAAAGCGCGCAGGTGGTTTAAATAAGTCTGATGTGAAAGCCC  
ACGGCTCAACCGTGGAGGGTATTGAAACTGTTAACTTGAAGTGCAGGAGAGAAAAGTGAATTCCTAGTGTAGCGGTG  
AAATGCGTAGAGATTAGGAGGAACACCAGTGGCGAAGGCGGCTTTTGGCCTGTAAGTCAACTGACACTGAGGCGCGAAAGCGTG  
GGGAG

>ASV:1052:Genus:Rheinheimera

TACAGAGGGTGCAAGCGTTAATCGGAATTACTGGGCGTAAAGCGCACGTAGGCGGTTTTTAAGTCAGATGTGAAAGCCC  
CGGGCTCAACTCGGAAGTGCATTTGAACTGGGAACTAGAGTGTGTGAGAGGGGGTAGAATTCAGGTGTAGCGGTG  
AAATGCGTAGAGATTTGGAGGAATACCAGTGGCGAAGGCGGCCCCCTGGCACAACTGACGCTCAGGTGCGAAAGCGTG  
GGGAG

>ASV:1053:Genus:Ruminococcaceae\_UCG-014

TACGTAGGGAGCGAGCGTTATCCGGATTTATTGGGTGTAAGGGTGCCTAGACGGGAAAATAAGTTAGTTGTGAAATCCC  
TCGGCTTAACGTAGGAACTGCAACTAAAAGTGTTCCTTGAAGTGCAGGAGGAAAGTGAATTCCTAGTGTAGCGGTG  
AAATGCGTAGATATTAGGAGGAACACCAGTGGCGAAGGCGGCTTCTGGACAGTAACTGACGTTGAGGCGCGAAAGTGTG  
GGGAG

>ASV:1054:Genus:Klebsiella

TACGGAGGGTGCAAGCGTTAATCGGAATTACTGGGCGTAAAGCGCACGAGGCGGCTGTCAAGTCCGATGTGAAATCCC  
CGGGCTTAACCTGGGAAGTGCATTCGAAACTGGCAGGCTAGAGTCTTGTAGAGGGGGTAGAATTCAGGTGTAGCGGTG  
AAATGCGTAGAGATCTGGAGGAATACCAGTGGCGAAGGCGGCCCCCTGGACAAAGACTGACGCTCAGGTGCGAAAGCGTG  
GGGAG

>ASV:1055:Genus:Halomonas

TACGGAGGGTGCGAGCGTTAATCGGAATTACTGGGCGTAAAGCGCGCTAGGTGGCTTGATAAGCCGGTTGTGAAAGCCC  
CGGGCTCAACCTGGGAACGGCATCCGGAAGTCCCAAGCTAGAGTGCAGGAGAGGAAGTAGAATTCGCGGTGTAGCGGTG  
AAATGCGTAGAGATCGGGAGGAATACCAGTGGCGAAGGCGGCTTCTGGACTGACACTGACACTGAGGTGCGAAAGCGTG  
GGTAG

>ASV:1056:Species:distasonis

TACGGAGGATCCGAGCGTTATCCGGATTTATTGGGTTAAAGGGTGCCTAGGCGGCTTTTAAGTCAGCGGTGAAAGTCT  
GTGGCTCAACCATAGAAATGCGGTTGAAACTGGGGGCTTGAAGTATGTTTGAAGGCGAGCGGAATGCGTGGTGTAGCGGTG  
AAATGCTAGATATCACGCAGAACCCGATTGCGAAGGCAGCTGCAAGCCATGACTGACGCTGATGACGAAAGCGTG  
GGGAT

>ASV:1057:Genus:Parabacteroides

TACGGAGGATCCGAGCGTTATCCGGATTTATTGGGTTAAAGGGTGCCTAGGCGGCTTTTAAGTCAGCGGTGAAAGTCT  
GTGGCTCAACCATAGAAATGCGGTTGAAACTGGGAGGCTTGAAGTATGTTTGAAGGCGAGCGGAATGCGTGGTGTAGCGGTG  
AAATGCTTAGATATCACGAAGAACTCCGATTGCGAAGGCAGCTCACTAGACTGTTACTGACACTGATGCTCGAAAGTGTG  
GGTAT

>ASV:1058:Genus:Bilophila

TACGGAGGGTGCAAGCGTTAATCGGAATCACTGGGCGTAAAGCGCACGTAGGCGGCGGTAAGTCAGGGGTGAAATCCC

ACAGCCAACTGTGGAAGTGCCTTGATACTGCCGGCTTGTAGTACCGGAGAGGGTGGCGGAATTCAGGTGTAGGAGTG  
AAATCCGTAGATATCTGGAGGAACACCCGGTGGCGAAGGCGGCCACCTGGACGGTAACGTACGCTGAGGTGCGAAAGCGTG  
GGTAG

>ASV:1059:Genus:Coprococcus\_3

TACGTATGGTGAAGCGTTATCCGGATTTACTGGGTGTAAGGGAGCGTAGACGGCTGTGTAAGTCTGAAGTAAAGCCC  
GGGGCTCAACCCCGGACTGCCTGGAAGTATGCAGCTAGAGTGTCCGAGAGGTAAGTGAATTCAGTGTAGCGGTG  
AAATGCGTAGATATTGGGAGGAACACCCAGTGGCGAAGGCGGCTTACTGGACGATGACTGACGTTGAGGCTCGAAAGCGTG  
GGGAG

>ASV:1060:Genus:Sphingomonas

TACGAGGGGAGCTAGCGTTATCCGGAATTACTGGGCGTAAAGCGCACGTAGGCGGCTTTGTAAGTTAGAGGTAAAGCCC  
GGGGCTCAACCCCGGACTGCATTTAAGACTGCATCGCTTGAATCCAGGAGAGGTGAGTGAATTCCTAGTGTAGAGGTG  
AAATTCGTAGATATTCCGGAAGAACACCCAGTGGCGAAGGCGGCTACTGGACTGGTATTGACGCTGAGGTGCGAAAGCGTG  
GGGAG

>ASV:1061:Genus:Oscillibacter

TACGTAGGTGGCAAGCGTTGTCCGGATTTACTGGGTGTAAGGGCGTGCAGCCGGCCGACAAGTCAAGTGTGAAATCCC  
GAGGCTTAACCTCGGAACTGCATTTGAAACTGTTGGTCTTGTAGTATCGGAGAGGTGATCGGAATTCCTTGTGTAGCGGTG  
AAATGCGTAGATATAAGGAAGAACACCCAGTGGCGAAGGCGGATGACTGGACGACAACGTACGCTGAGGCGCGAAAGCGTG  
GGGAG

>ASV:1062:Genus:Dorea

TACGTAGGGGGCAAGCGTTATCCGGATTTACTGGGTGTAAGGGAGCGTAGACGGCACGGCAAGCCAGATGTGAAAGCCT  
GGGGCTCAACCCCGGACTGCATTTGAAACTGCTGAGCTAGAGTGTCCGAGAGGCAAGTGAATTCCTAGTGTAGCGGTG  
AAATGCGTAGATATTAGGAGGAACACCCAGTGGCGAAGGCGGCTTGTGGACGATGACTGACGTTGAGGCTCGAAAGCGTG  
GGGAG

>ASV:1063:Genus:Erysipelatoclostridium

TACGTAGGTGGCAAGCGTTATCCGGATTTACTGGGCTAAAGAGGGAGCAGGCGGCAATAGAGGTCTGTGGTAAAGGCT  
GAAGCTTAACCTCAGTAAGCCATGAAACAGATAGCTAGAGGACAGCAGAGGAAACGCGGAATTCATGTGTAGCGGTGA  
AATGCGCAGATATATGGAGGAACACCCAGTGGCGAAGGCGGCTTCTGGGCTGTAGCTGACGCTCAGTCCGAAAGCGGTG  
GGAG

>ASV:1064:Genus:Prevotella\_2

TACGGAAGGTTCCGGGCTTATCCGGATTTATTGGGTTAAAGGGAGCGTAGGCGGTTTGTAAAGCGTGTGTGAAATGTC  
GGGGCTCAACCTGGGCATTGACGCGCAACTGGCAGACTTGTAGTGCAGCGGGAAGTAGGCGGAATTCGTGCTGTAGCGGTG  
AAATGCTTAGATATACGAAGAACCTCCGATTGCGAAGGCAGCTGCTGTAGCGTAACGTACGCTGAAGCTCGAAAGCGTG  
GGTAT

>ASV:1065:Species:micronuciformis

TACGTAGGTGGCAAGCGTTGTCCGGATTTACTGGGCTAAAGGGCGCGCAGGCGGCTTCTTAAGTCTGTCTTAAAGTGC  
GGGGCTTAACCCCGTGTAGGATGGAAGTGGGAAGCTCAGAGTATCGGAGAGGAAAGCGGAATTCCTAGTGTAGCGGTG  
AAATGCGTAGATATTAGGAGGAACACCCAGTGGCGAAGGCGGCTTCTGGACGAAAACGTACGCTGAGGCGCGAAAGCCAG  
GGGAG

>ASV:1066:Genus:Parabacteroides

TACGGAGGATCCGAGCGTTATCCGGATTTATTGGGTTAAAGGGTGCCTAGGCGGCTTCTTAAGTCAAGCGGTGAAAGTCT  
GTGGCTCAACCATAGAATTGCCGTTGAAACTGGGAGGCTTGTAGTATGTTTGGAGCAGGCGGAATGCGTGGTGTAGCGGTG  
AAATGCTTAGATATACGAAGAACCTCCGATTGCGAAGGCAGCTGCTTAAGCTGCAACTGACATTGAGGCTCGAAAGTGTG  
GGTAT

>ASV:1067:Family:Lachnospiraceae

TACGTAGGGGGCAAGCGTTATCCGGATTTACTGGGTGTAAGGGAGCGTAGACGGCATGGCAAGCCAGATGTGAAAGCCC  
GGGGCTCAACCCCGGACTGCATTTGAAACTGTCAGGCTAGAGTGTGGAGAGGAAAGCGGAATTCCTAGTGTAGCGGTG  
AAATGCGTAGATATTAGGAGGAACACCCAGTGGCGAAGGCGGCTTCTGGACGATGACTGACGTTGAGGCTCGAAAGCGTG  
GGGAG

>ASV:1068:Species:aeruginosa/baetica/batumici/cannabina/chlororaphis/cinnamophila/fluorescens/  
fulva/fuscovaginae/granadensis/japonica/koreensis/moraviensis/putida/teessidea/veronii

TACAGAGGGTGAAGCGTTAATCCGGAATTACTGGGCGTAAAGCGCGCTAGGTGGTTGTTAAGTTGGATGTGAAATCCC  
CGGGCTCAACCTGGGAAGTGCATCCAAAAGTGGCGAGCTAGAGTATGGTAGAGGGTGGTGAATTTCTGTGTAGCGGTG  
AAATGCGTAGATATTAGGAAGGAACACCCAGTGGCGAAGGCGCACCTGGACTGATACTGACTGAGGTGCGAAAGCGTG  
GGGAG

>ASV:1069:Family:Ruminococcaceae

TACGTAGGGAGCGAGCGTTGTCCGGAATTACTGGGTGTAAGGGAGCGTAGGCGGATTGCAAGTTGAATGTGAAATCTA  
TGGGCTTAACCCATAAAGTGGGTTCAAAAAGTGCAGTTCTTGTAGTGAAGTAGAGGCGAGGCGGAATTCCTAGTGTAGCGGTG  
AAATGCGTAGATATTAGGAGGAACACCCAGTGGCGAAGGCGGCTTCTGGGCTTAACTGACGCTGAGGCTCGAAAGCGTG  
GGTAG

>ASV:1070:Genus:Ruminococcaceae\_UCG-013

TACGTAGGTGGCAAGCGTTGTCCGGATTTACTGGGTGTAAGGGAGCGTAGGCGGATATCAAGTTAGTGTGAAATAC  
GGGGCTCAACCCCGGGCTGCGATTAAAAGTGCATTTCTTGTAGTATCGGAGAGGAAAGCGGAATTCCTAGTGTAGCGGTG  
AAATGCGTAGATATTAGGAGGAACACCCAGTGGCGAAGGCGGCTTCTGGACGACAACGTACGCTGAGGCGCGAAAGTGTG  
GGGAG

>ASV:1071:Genus:Alloprevotella

TACGGAAGGTTCCAGGCGTTATCCGGATTTATTGGGTTAAAGGGAGCGCAGGCGGATTCTTAAGTCAAGTGTGAAATAC  
GCGGCTCAACCGTGGACTGCAGTTGATACTGGGAGTCTTGTAGTGCACACAGGGATGCTGGAATTCATGGTGTAGCGGTG  
AAATGCTCAGATATCATGAAGAACCTCGATCGGAAGGCAGTATCCGGGTGCAACTGACGCTGAGGCTCGAAAGTGC

GGTAT  
>ASV:1072:Genus:GCA-900066225  
TACGTAGGTGGCAAGCGTTGTCCGGAATTACTGGGTGTAAGGGAGCGTAGGCGGGAAGATAAGTTGGACGTCTAATCTA  
TCGGCTCAACCGATAGTCGCGTTCAAACCTGTTTTCTTGAGTGAAGTAGAGGTAAGCGGAATTCCTAGTGTAGCGGTGA  
AATGCGTAAATATTAGGAGAACACCAGTGGCGAAGGCGCTTACTGGGCTTAACTGACGCTGAGGCTCGAAAGCGTGG  
GTAGC  
>ASV:1073:Genus:Enterococcus  
TACGTAGGTGGCAAGCGTTGTCCGGAATTATTGGGCGTAAAGCGAGCGCAGGCGGTCTCTTAAGTCTGATGTGAAAGCCC  
CCGGCTTAAACGGGGAGGGTCATTGGAACCTGGGAGACTTGAAGTGCAGAAGAGGAAAGCGGAATTCATGTGTAGCGGTG  
AAATGCGTAGATATATGAGGAAACACCAGTGGCGAAGGCGGCTTTCTGGTCTGTAACGACGCTGAGGCTCGAAAGCGTG  
GGGAG  
>ASV:1074:Genus:Anaerofilum  
AACGTAGGTGGCAAGCGTTGTCCGGAATTACTGGGTGTAAGGGAGCGCAGGCGGAAGTGAAGTTGGATGTCAAATCTA  
CGGGCTCAACCCGTATACGCATTCAAACCTGCGGTTCTTGAGTAGTGCAGAGGTAGGCGGAATTCCTAGTGTAGCGGTGG  
AATGCGTAGATATCGGGAGGAAACACCAGTGGCGAAGGCGGCTTACTGGGCACCAACTGACGCTGAGGCTCGAAAGCATGG  
GTAGC  
>ASV:1075:Species:rubiinfantis  
TACGTAGGGAGCGAGGTTGTCCGGAATTACTGGGTGTAAGGGAGCGTAGGCGGGATGGCAAGTTGGATGTTTAAACTA  
ACGGCTCAACTGTTAGTGCATCCAAACCTGCTGTTCTTGAGTGAAGTAGAGGCAGGCGGAATTCCTAGTGTAGCGGTGA  
AATGCGTAGATATTAGGAGGAAACACCAGTGGCGAAGGCGGCTGCTGGGCTTAACTGACGCTGAGGCTCGAAAGCGTGG  
GGAGC  
>ASV:1076:Genus:Lachnospiraceae\_NK4A136\_group  
TACGTAGGGGGCAAGCGTTATCCGGATTTACTGGGTGTAAGGGAGCGTAGACGGTATGGCAAGTCTGAAGTAAAACCC  
GCAGCTTAACTGTGGGACTGCTTTGGAACCTGTTAACTAGAGTGCAGGAGAGGTAAGTGAATTCCTAGTGTAGCGGTG  
AAATGCGTAGATATTAGGAGGAAACACCAGTGGCGAAGGCGGCTTACTGGACTGTAACGACGTTGAGGCTCGAAAGCGTG  
GGGAG  
>ASV:1077:Species:acidophilus/brevis/casei/delbrueckii/fabifermentans/fermentum/helveticus/  
japonicus/paracasei/paraplantarum/pentosus/plantarum/rhamnosus/sakei  
TACGTAGGTGGCAAGCGTTGTCCGGAATTATTGGGCGTAAAGCGAGCGCAGGCGGTTTTTAAAGTCTGATGTGAAAGCCT  
TCGGCTCAACCGAAGAAGTGCATCGGAACTGGGAACTTGAAGTGCAGAAGAGGACAGTGAATTCCTAGTGTAGCGGTG  
AAATGCGTAGATATTAGGAGGAAACACCAGTGGCGAAGGCGGCTGCTGGTCTGTAACGACGCTGAGGCTCGAAAGTATG  
GGTAG  
>ASV:1078:Family:Christensenellaceae  
TACGTAGGGAGCGAGGTTGTCCGGAATTACTGGGCGTAAAGGGTGCAGTGGCGGCTGTGTAAGTCAAGTGTGAAATACC  
GGGGCTTAACTCGGGGCTGCATCTGATACTGCATAGCTTGAAGTGCAGGAGAGGAAAGCGGAATTCCTAGTGTAGCGGTG  
AAATGCGTAGATATTAGGAGGAAACACCAGTGGCGAAGGCGGCTTTCTGGACTGTAACGACGCTGAGGCACGAAAGCGTG  
GGGAG  
>ASV:1079:Species:chilensis/ginsengisoli/italica/macrogoltabida/soli  
TACGGAGGGAGCTAGCGTTGTCCGGAATTACTGGGCGTAAAGCGCGCTAGGCGGTTTTTAAAGTCAAGGTTGAAAGCCC  
GGGGCTCAACCCCGAATTGCCTTTGAAACTGGAACCTGGAATCTTGAGAGGTCAGTGAATTCAGTGTAGAGGTG  
AAATTCGTAGATATTGGAAGAACACCAGTGGCGAAGGCGACTGACTGGACAAGTATTGACGCTGAGGTGCGAAAGCGTG  
GGGAG  
>ASV:1080:Genus:Lactococcus  
TACGTAGGTCCCGAGCGTTGTCCGGAATTATTGGGCGTAAAGCGAGCGCAGGTGGTTTTAAGTCTGGTGTAAAAGGCA  
GTGGCTCAACCATTTGATGCATTGGAACCTGGTAGACTTGAAGTGCAGGAGAGGAGAGTGAATTCCTAGTGTAGCGGTGA  
AATGCGTAGATATTAGGAGGAAACACCAGTGGCGAAGGCGGCTTCTGGCCTGTAACGACACTGAGGCTCGAAAGCGTGG  
GGAGC  
>ASV:1081:Genus:Tyzzerella  
TACGTAGGGGGCAAGCGTTATCCGGAATTACTGGGTGTAAGGGAGCGTAGGCGGCATGGTAAGCCAGATGTGAAAGCCC  
GGGGCTTAACTCCGAGGATTGCATTTGAACTATCAAGCTAGAGTACAGGAGAGGAAAGCGGAATTCCTAGTGTAGCGGTG  
GAAATGCGTAGATATTAGGAGGAAACACCAGTGGCGAAGGCGGCTTTCTGGACTGAACTGACGCTGAGGCTCGAAAGCGTG  
GGGGA  
>ASV:1082:Genus:Ruminococcaceae\_UCG-002  
TACGTAGATGGCAAGCGTTGTCCGGAATTACTGGGTGTAAGGGCGTGCAGCCGGGTCTGCAAGTCAAGTGTGAAATCCA  
TGGGCTCAACCCATGAACTGCATTTGAACTGTAGATCTTGAAGTGCAGGAGGGCAATCGGAATTCCTAGTGTAGCGGTG  
AAATGCGTAGATATTAGGAGGAAACACCAGTGGCGAAGGCGGATTGCTGGACGATAACGACGCTGAGGCGCGAAAGTGTG  
GGGAG  
>ASV:1083:Genus:Prevotella\_9  
TACGGAAGGTCCGGGCTTATCCGGATTTATTGGGTTAAAGGGAGCGTAGGCGGAGATTAAGCGTGTGTGAAATGTA  
GATGCTCAACATCTGAACTGCAGCGCAACTGGTTTCTTGAAGTACGCATAAAGTGGGCGGAATTCGTGGTGTAGCGGTG  
AAATGCTTAGATATCACGAAGAACTCCGATTGCGAAGGCAGTTCCTGAGGCGCAACTGACGCTGAAGCTCGAAAGCGCG  
GGTAT  
>ASV:1084:Genus:Parabacteroides  
TACGGAGGATCCGAGCGTTATCCGGATTTATTGGGTTAAAGGGTGCAGTGGCGGCTTAAAGTCAAGTGTGAAAGTCT  
GTGGCTCAACCATAGAATTGCCGTTGAAACTGGGAGGCTTGAAGTGTGTTGAGGCGAGGCGGAATGCGTGGTGTAGCGGTG  
AAATGCTTAGATATCACGAAGAACTCCGATTGCGAAGGCAGTTCCTGAGGCTGTTACTGACACTGATGCTCGAAAGTGTG  
GGTAT  
>ASV:1085:Genus:Lachnoclostridium



TACGTAGGGGGCAAGCGTTATCCGGATTTACTGGGTGTAAGGGAGCGTAGACGGCATGGCAAGCCAGATGTGAAAGCCC  
GGGGCTCAACCCCGGGACTGCATTTGGAACCTGTCAGGCTAGAGTGTCCGAGAGGTAAGCGGAATTCCTAGTGTAGCGGTG  
AAATGCGTAGATATTAGGAGGAACACCAGTGGCGAAGGCGGCTTACTGGACGATGACTGACGTTGAGGCTCGAAAGCGTG  
GGGAG  
>ASV:1086:Species:gorbachii/harei/phoceensis/rhinitidis/senegalensis/tyrrelliae  
TACGTAGGGGGCTAGCGTTGTCCGGAATCACTGGGCGTAAAGGGTTCGAGGCGGAAATGCAAGTCAGATGTAAAAGGCA  
GTAGCTTAACTACTGTAAGCATTTGAAACTGCATATCTTGAGAAGAGTAGAGGTAAGTGGAAATTTTCTAGTGTAGCGGTGA  
AATGCGTAGATATTAAGGAATAACCGGTGGCGAAGGCGACTTACTGGGCTCATTCTGACGCTGAGGAACGAAAGCGGTG  
GTAGC  
>ASV:1087:Family:Lachnospiraceae  
TACGTATGGTGCAAGCGTTATCCGGATTTACTGGGTGTAAGGGAGCGTAGGCGGTTTTATAAGTCTGGTGTGAAAGCCC  
GGGGCTCAACCCCGGGACTGCATTGGAACCTGTAAGTGTAGAGTGTCCGAGGGGTAAGTGGAAATTCCTAGTGTAGCGGTG  
AAATGCGTAGATATTAGGAGGAACACCAGTGGCGAAGGCGGCTTACTGGACGATTACTGACGCTGAGGCTCGAAAGCGTG  
GGGAG  
>ASV:1088:Genus:Methanobrevibacter  
CACCGCAGCTCTAGTGGTAGCAGTTTTTATTGGGCTAAAGCGTCCGTAGCCGGTTTTAATAAGTCTCTGGTAAAATCCT  
GCAGCTTAACTGTGGGAATTGCTGGAGATACTATTAGACTTGAGATCGGGAGAGGTTAGAGGTAATCCCAGGGTAGAGGT  
GAAATGCTGTAATCCTGGGAGGACCGCTGTTGCGAAGGCGCTGACTGGAACGATTCTGACGCTGAGGGACGAAAGCTA  
GGGGC  
>ASV:1089:Genus:Allisonella  
TACGTAGGTGGCAAGCGTTGTCCGGAATTATTGGGCGTAAAGCGCGCAGGCGGCCGTGCAAGTCCATCTTAAAAGCGT  
GGGGCTTAAACCCATGAGGGGATGGAACCTGCATGGCTGGAGTGTCCGAGGGGAAAGTGGAAATTCCTAGTGTAGCGGTGA  
AATGCGTAGAGATTAGGAAGAACACCAGTGGCGAAGGCGACTTCTAGACGCAACTGACGCTGAGGCGCGAAAGCGGTG  
GGAGC  
>ASV:1090:Genus:Planomicrobium  
TACGTAGGTGGCAAGCGTTGTCCGGAATTATTGGGCGTAAAGCGCGCAGGCGGTCCCTAAGTCTGATGTGAAAGCCC  
ACGGCTCAACCGTGGAGGCTATTGGAACCTGGGGACTTGAGTGCAGAAGAGGAAAGTGGAAATTCACGCTGTAGCGGTG  
AAATGCGTAGAGATGTGGAGGAACACCAGTGGCGAAGGCGACTTCTGGTCTGTAACGACGCTGAGGCGCGTAAGCGTG  
GGGAG  
>ASV:1091:Species:hominis  
TACGTAGGTGGCAAGCGTTATCCGGAATTATTGGGCGTAAAGCGCGCTAGGCGGTTTTTAAAGTCTGATGTGAAAGCCC  
ACGGCTCAACCGTGGAGGCTATTGGAACCTGGAACCTTGAGTGCAGAAGAGGAAAGTGGAAATTCATGTGTAGCGGTG  
AAGTGCAGAGATATTGGAGGAACACCAGTGGCGAAGGCGACTTCTGGTCTGTAACGACGCTGATGTGCGAAAGCGTG  
GGGAT  
>ASV:1092:Genus:Lachnospira  
TACGTATGGAGCAAGCGTTATCCGATTTACTGGGTGTAAGGGAGTGTAGGTGGCATCACAAGTCAGAAGTGAAGGCC  
GGGGCTCAACCCATGAGGACTGCTTTTGAACCTGTGGAGCTGGAGTGCAGGAGAGGCAAGTGGAAATTCCTAGTGTAGCGGTG  
AAATGCGTAGATATTAGGAGGAACACCAGTGGCGAAGGCGGCTTACTGGACTGTAACGACTGAGGCTCGAAAGCGTG  
GGGAG  
>ASV:1093:Genus:Ruminococcaceae\_UCG-003  
TACGTAGGTGGCAAGCGTTGTCCGATTTACTGGGTGTAAGGGCGTGCAGCCGGGCATGCAAGTCAGATGTGAAATCTC  
AGGGCTTAAACCTGAAACTGCATTTGAAACTGTATGCTTGAGTGCAGGAGGTAATCGAAATTCCTTGTGTAGCGGTG  
AAATGCATAGATATAAGGAAGAACACCAGTGGCGAAGGCGGATTTACTGGACGTAACGACGCTGAGGCGCGAAAGCGTG  
GGGAG  
>ASV:1094:Family:Ruminococcaceae  
AACGTAGGTGGCAAGCGTTGTCCGGAATTACTGGGTGTAAGGGAGCGCAGGCGGGATCGTAAGTTGGGAGTGAATTC  
TGGGCTCAACCCATGAGCCTGCTTTGAAACTGCGATTCTTGAGTGGTGTAGAGGTAGCGGAAATTCCTGGTGTAGCGGTG  
GAATGCGTAGATATCGGGAGGAACACCAGTGGCGAAGGCGGCTTACTGGGCTAAGTACGCTGAGGCTCGAAAGCATG  
GGTAG  
>ASV:1095:Genus:Ruminiclostridium\_5  
TACGTAGGGAGCGAGCGTTGTCCGATTTACTGGGTGTAAGGGTGCCTAGGCGCGAGGCAAGTCAAGCGTGAATCTA  
TGGGCTTAAACCCATAAAGTGCCTTGAACCTGCTTCTGCTTGAAGTGAAGTAGAGGTAGGCGGAAATTCCTGGTGTAGCGGTG  
AAATGCGTAGAGATCGGGAGGAACACCAGTGGCGAAGGCGGCTTACTGGGCTATAACTGACGCTGAAGCACGAAAGCATG  
GGTAG  
>ASV:1096:Family:Mitochondria  
GACGGGGGGGCAAGTGTCTTCCGGAATGACTGGGCGTAAAGGGCACGTAGGCGGTGAATCGGGTTGAAAGTGAAGTCCG  
CCAAAACTGCGGGAATGCTCTCGAAACCAATTCCTTGAGTGCAGACAGAGGAGAGTGGAAATTCCTGTGTAGGGGTGAA  
ATCCGGAGATCTACGAAGGAACGCCAAAGCGAAGGCGAGCTCTCTGGTCCCTACCGACGCTGGAGTGCAGAAAGCATGG  
GAGCG  
>ASV:1097:Genus:Intestinibacter  
TACGTAGGGGGCTAGCGTTATCCGATTTACTGGGCGTAAAGGGTGCCTAGGCGGCTTTTTAAGTCAAGGAGTGAAGGCT  
ACGGCTCAACCGTAGTAAGCTCTTGAACCTGGAGACTTGAGTGCAGGAGAGGAGAGTGGAAATTCCTAGTGTAGCGGTGA  
AATGCGTAGATATTAGGAGGAACACCAGTGGCGAAGGCGGCTCTCTGGACTGTAACGACTGACGCTGAGGACGAAAGCGTG  
GGAGC  
>ASV:1098:Family:Lachnospiraceae  
TACGTATGGTGCAAGCGTTATCCGATTTACTGGGTGTAAGGGAGCGTAGACGGAGCAGCAAGTCTGATGTGAAAACCC  
GGGGCTCAACCCCGGGAGTGCATTGGAACCTGTTGATCTAGAGTGTGGAGAGGTAAGTGGAAATTCCTAGTGTAGCGGTG  
AAATGCGTAGATATTAGGAGGAACACCAGTGGCGAAGGCGGCTTACTGGACAGTACTGACGTTGAGGCTCGAAAGCGTG

GGGAG  
>ASV:1099:Genus:Alloprevotella  
TACGGAAAGGTCCGGGCGTTATCCGGATTTATTGGGTTTAAAGGGAGCGCAGGCGGACCTTTAAGTCAGCTGTGAAATACG  
GCGGCTCAACCGTCAAGTGCAGTTGATACTGGAGGCTTGGAGTGCACACAGGGATGCTGGAATTCATGGTGTAGCGGTG  
AAATGCTCAGATATCATGAAGAACTCCGATCGCAAGGCAGGCATCCGGGTGCAACTGACGCTGAGGCTCGAAAGTGCG  
GGTAT  
>ASV:1100:Genus:Subdoligranulum  
AACGTAGGGTGCAAGCGTTGTCCGGAATTACTGGGTGTAAGGGGGCGCAGGCGGACCGGCAAGTTGGAAGTAAAACCTA  
TGAGCTCAACCCATAAATTGCTTTCAAACTGCTGGCCTTGGAGTGCAGAGGTAGGTGGAATTCCTGGTGTAGCGGTG  
GAATGCGTAGATATCGGAGGAACACCAGTGGCGAAGGCACCTACTGGGCACCAACTGACGCTGAGGCTCGAAAGCATG  
GGTAG  
>ASV:1101:Species:succinatiphilus  
TACGTAGGTGGCAAGCGTTGTCCGGAATTATTGGGCTAAAGCGCGCAGGCGGCTTTCTAAGTCCATCTTAAAAGTGC  
GGGGCTTAACCCCGTATGGGATGGAAGTGGGAGTATCGGAGAGGAAAGTGAATTCCTAGTGTAGCGGTGA  
AATGCGTAGAGATTAGGAAGAACACCGGTGGCGAAGGCAGCTTCTGGACGACAACTGACGCTGAGGCGGAAAGCGTGG  
GGAG  
>ASV:1102:Genus:Acidaminococcus  
TACGTAGGTGGCAAGCGTTGTCCGGAATTATTGGGCTAAAGAGCATGTAGGCGGGCTTTAAGTCTGACGTGAAAATGC  
GGGGCTTAACCCCGTATGGCGTTGAATACTGGAAGTCTTGGAGTGCAGGAGAGGAAAGGGGAATTCCTAGTGTAGCGGTGA  
AATGCGTAGATATTGGGAGGAACACCAGTGGCGAAGGCAGCTTCTGGACTGTGTCTGACGCTGAGATGCGAAAGCCAGG  
GTAGC  
>ASV:1103:Species:aminovorans/extorquens/organophilum/podarium/populi/pseudosasae/rhodesianum/  
suomiense/thiocyanatum/zatmanii  
TACGAAGGGGGCTAGCGTTGTCCGGAATCACTGGGCGTAAAGGGCGCGTAGGCGGCCGATTAAGTGGGGGTGAAAGCCT  
GTGGCTCAACCCAGAAATTGCTTTCGATACTGTTGGCTTGGAGACCGGAAGAGGACAGCGGAACTGCGAGTGTAGAGGTG  
AAATTCGTAGATATTCGCAAGAACACCAGTGGCGAAGGCAGCTTCTGGTCCGGTCTGACGCTGAGGCGGAAAGCGTG  
GGGAG  
>ASV:1104:Family:Lachnospiraceae  
TACGTAGGGGGCAAGCGTTATCCGGATTTACTGGGTGTAAGGGAGCGTAGACGGCTGTGTAAGTCTGATGTGAAAGATC  
GGGGCTCAACCCCGGGCTGCATTGGAAGTGTGCAGCTAGAGTGTGCGGAGAGGTAAGTGAATTCCTAGTGTAGCGGTG  
AAATGCGTAGATATTAGGAGGAACACCAGTGGCGAAGGCAGCTTACTGGACGATGACTGACGTTGAGGCTCGAAAGCGTG  
GGGAG  
>ASV:1105:Genus:Christensenellaceae\_R-7\_group  
TACGTAGGGGGCGAGCGTTGTCCGGAATGATTGGGCGTAAAGGGCGCGTAGGCGGCCGTTGTAAGTCTGAAGTAAAAGTCC  
CGCTTCAAGTGGGAATTGCTTTGGATACTGCTGGCCTTGGAGTGCAGGAGAGGAAAGCGGAAATTCCTGGTGTAGCGGTG  
AAATGCGTAGAGATCGGAGGAACACCAGTGGCGAAGGCAGCTTCTGGACTGTAAGTACGCTGAGGCGGAAAGCGTG  
GGGAG  
>ASV:1106:Genus:Blautia  
TACGTAGGGGGCAAGCGTTATCCGGATTTACTGGGTGTAAGGGAGCGTAGACGGTGTGGCAAGTCTGATGTGAAAGGCA  
TGGGCTCAACCTATGACTGCATTGGAAGTGTGCATCTTGGAGTGCAGGAGGGTAAGCGGAAATTCCTAGTGTAGCGGTG  
AAATGCGTAGATATTAGGAGGAACACCAGTGGCGAAGGCAGCTTACTGGACGTAAGTACGCTGAGGCTCGAAAGCGTG  
GGGAG  
>ASV:1107:Species:hongkongensis  
TACGTAGGGAGCAAGCGTTGTCCGGAATTACTGGGCGTAAAGGGTGCCTAGGTCGATGTAAGTCAAGTGTGAAAGACC  
GGGGCTCAACCCCGGGTGTCACTTGAAGTGTGTGGCTTGGAGTGCAGGAGAGGAAAGTGAATTCCTAGTGTAGCGGTG  
AAATGCGTAGATATTAGGAGGAACACCAGTGGCGAAGGCAGCTTCTGGACTGTAAGTACGCTGAGGCGGAAAGCGTG  
GGGAG  
>ASV:1108:Species:bartlettii  
TACGTAGGGGGCTAGCGTTATCCGGATTTACTGGGCGTAAAGGGTGCCTAGGCGGCTTTTAAGTCAAGTGTGAAAGGCT  
ACGGCTCAACCGTAGTAAGCTCTTGAAGTGGGGACTTGGAGTGCAGGAGAGGAGAGTGAATTCCTAGTGTAGCGGTGA  
AATGCGTAGATATTAGGAGGAACACCAGTAGCGAAGGCAGCTTCTGGACTGTAAGTACGCTGAGGCGGAAAGCGTG  
GGAGC  
>ASV:1109:Species:secundus  
TACGGAGGATGCGAGCGTTATCCGGATTTATTGGGTTTAAAGGGTGCCTAGGCGGCCCTATAAGTCAAGTGTGAAATGTT  
CCGGCTCAACCCGGAAACTGCCGTTGAAACTGTAGAGCTAGAGTCCACAAGAGGTATGCGGAATGCGTGGTGTAGCGGTG  
AAATGCATAGATATCACGCAGAACCCGATTGCGAAGGCAGCATACTGGGTTGAAACAGACGCTGAAGCACGAAAGCGTG  
GGTAT  
>ASV:1110:Species:coli  
TACGGAGGGTGCAAGCGTTAATCCGGAATTACTGGGCGTAAAGGGCAGCGCAGGCGGTTTGTAAAGTCAAGTGTGAAATCCC  
CGGGCTCAACCTGGAACTGCATCTGATACTGGCAAGCTTGGAGTCTCGTAGAGGGGGGTAGAATTCAGGTGTAGCGGTG  
AAATGCGTAGAGATCTGGAGGAATACCGGTGGCGAAGGCAGCCCTGGACGAAGACTGACGCTCAGGTGCGAAAGCGTG  
GGGAG  
>ASV:1111:Species:benzoelyticum/bifermentans  
TACGTAGGGGGCTAGCGTTATCCGGAATTACTGGGCGTAAAGGGTGCCTAGGTTGGTTTTTAAGTCAAGTGTGAAAGGCT  
ACGGCTCAACCGTAGTAAGCTTTTGAAGTGTGAGAACTTGGAGTGCAGGAGAGGAGAGTAGAATTCCTAGTGTAGCGGTGA  
AATGCGTAGATATTAGGAGGAATACAGTAGCGAAGGCAGCTTCTGGACTGTAAGTACGCTGAGGCGGAAAGCGTG  
GGAGC  
>ASV:1112:Species:flavus/luteus/yunnanensis

TACGTAGGGTGCGAGCGTTATCCGGAATTATTGGGCGTAAAGAGCTCGTAGGCGGTTTGTACAGTCTGTCTGTAAGTCC  
GGGGCTTAACCCCGGATCTGCGGTGGGTACGGGCAGACTAGAGTGCAGTAGGGGAGACTGGAATTCCTGGTGTAGCGGTG  
GAATGCGCAGATATCAGGAGGAACACCGATGGCGAAGGCAGGTCTCTGGGCTGTAACGACGCTGAGGAGCGAAAGCATG  
GGGAG  
>ASV:1113:Genus:Ruminococcus\_1  
TACGTAGGGAGCGAGCGTTGTCCGGAATTACTGGGTGTAAGGGAGCGTAGGCGGGACGGCAAGTCAGATGTGAATACTA  
TGGGCTCAACTCATAGACTGCATTTGAAACTGTTGTTCTTGAGTGAGGTAGAGGTAAGCGGAATTCCTGGTGTAGCGGTG  
AATGCGTAGAGATCAGGAGGAACATCGGTGGCGAAGGCGGCTTACTGGGCTTTACTGACGCTGAGGCTCGAAAGCGTG  
GGGAG  
>ASV:1114:Family:Ruminococcaceae  
TACGTAGGATGCAAGCGTTATCCGGATTTACTGGGTGTAAGGGAGCGCAGGCGGGACTGCAAGTTGGATGTGAAATACC  
GTGGCTTAACACCGAACTGCATCCAAAAGTGAAGTTCTTGAGTGAAGTAGAGGCAAGCGGAATTCGAGTGTAGCGGTG  
GAAATGCGTAGATATTCGGAGGAACACCCAGTGGCGAAGGCGGCTTGTGGGCTTTAACTGACGCTGAGGCTCGAAAGTGT  
GGGGA  
>ASV:1115:Genus:Parabacteroides  
TACGGAGGATGCGAGCGTTATCCGGATTTATTGGGTTAAAGGGTGCCTAGGTGGTTTTTTAAGTCAGCGGTGAAAGTTT  
GTGGCTCAACCATAAAATTGCCGTTGAAACTGGGGAACCTTGAATATATTTGAGGTAGCGGGAATGCGTGGTGTAGCGGTG  
AATGCGTAGATATCACGCAGAACTCCGATTGCGAAGGCAGCTTACTAACTATAACTGACACTGAAGCACGAAAGCGTG  
GGGAT  
>ASV:1116:Species:idrijaensis/lwoffii  
TACAGAGGGTCAAGCGTTAATCCGATTTACTGGGCGTAAAGCGCGCTAGGTGGCCAATTAAGTCAAATGTGAAATCCC  
CGAGCTTAACCTGGGAATTGCATTCGATACTGGTGGCTAGAGTATGGGAGAGGATGGTAGAATTCAGGTGTAGCGGTG  
AATGCGTAGAGATCTGGAGGAATACCGATGGCGAAGGCAGCCATCTGGCCTAATACTGACACTGAGGTGCGAAAGCATG  
GGGAG  
>ASV:1117:Family:Muribaculaceae  
TACGGAGGATGCGAGCGTTATCCGGATTTATTGGGTTAAAGGGTGCCTAGGCGGAACTCCAAGTCAGCGGTAAAAATC  
GGGGCTCAACCCCGTCTGCCGTTGAAACTGGGTCCTTGAGTGGGCGAGAAGTATGCGGAATGCGTGGTGTAGCGGTG  
AATGCGTAGATATCACGCAGAACCCCGATTGCGAAGGCAGCATACCGCGCCCTACTGACGCTGAAGCACGAAAGCGTGG  
GTATC  
>ASV:1118:Genus:Bifidobacterium  
TACGTAGGGTGCGAGCGTTATCCGGAATTATTGGGCGTAAAGGGCTCGTAGGCGGTTCTGCGGTCGGGTGTGAAAGCCC  
ATCGCTTAACCGTGGGTCTGCGCCGGTACGGGCGGGCTGGAGTGCAGGAGAGGTAAGTGGGAATTCCTGGTGTAGCGGTG  
GAATGTGTAGATATCGGGAAGAACAACCAATGGCGAAGGCAGGTCTCTGGGCGCTCACTGACGCTGAGGAGCGAAAGCGTG  
GGGAG  
>ASV:1119:Genus:Lachnospiraceae\_UCG-004  
TACGTAGGGGGCAAGCGTTATCCGGATTTACTGGGTGTAAGGGAGCGTAGACGGCGATGCAAGTCTGAAGTGAAGGCC  
CGGGCTCAACCTGGGACTGCATCCAAAAGTGTAGCTAGAGTGTGGAGAGGTAAGCGGAATTCCTAGTGTAGCGGTG  
AATGCGTAGATATTAGGAGGAACACCCAGTGGCGAAGGCGGCTTACTGGACGTAAGTACGCTTGAAGCTCGAAAGCGTG  
GGGAG  
>ASV:1120:Species:alcaliphila/mendocina/oleovorans/putida/songnenensis/stutzeri/xanthomarina  
TACGAAGGGTGAAGCGTTAATCCGGAATTACTGGGCGTAAAGCGCGCTAGGTGGTTCTGTTAAGTTGGATGTGAAAGCCC  
CGGGCTCAACCTGGGACTGCATCCAAAAGTGTAGCTAGAGTGTGGAGAGGTAAGTGGGAATTCCTAGTGTAGCGGTG  
AATGCGTAGATATAGGAAGAACACCCAGTGGCGAAGGCGACACCTGGGCTAATACTGACACTGAGGTGCGAAAGCGTG  
GGGAG  
>ASV:1121:Family:Lachnospiraceae  
TACGTAGGGGGCAAGCGTTATCCGGATTTACTGGGTGTAAGGGAGCGTAGGTGGCAAGGCAAGTCAGATGTGAAAACCT  
GGGGCTCAACCCGGGACTGCATTTGAAACTGTCTAGCTAGAGTGCAGGAGAGGTAAGTGGGAATTCCTAGTGTAGCGGTG  
AATGCGTAGATATTAGGAGGAACACCCAGTGGCGAAGGCGGCTTACTGGACTGTAAGTACACTGAGGCTCGAAAGCGTG  
GGGAG  
>ASV:1122:Genus:Ruminiclostridium\_9  
TACGTAGGTGGCAAGCGTTATCCGGATTTACTGGGTGTAAGGGCGTGTAGGCGGGCTGCAAGTCAGGTGTGAAATCC  
AGGGCTCAACCTGGGACTGCATTTGAAACTGTGGTCTTGAGTGTGGAGAGGCGAGCGGAATTCCTGTGTAGCGGTG  
AATGCGTAGATATACGGAGGAACACCCAGTGGCGAAGGCGGCTGCTGGACATTAAGTACGCTGAGGCGCGAAAGCGTG  
GGGAG  
>ASV:1123:Genus:Catenibacterium  
TACGTAGGTGGCGAGCGTTATCCGGAATCATTGGGCGTAAAGGGAGCAGGCGGGCGCAAGGCTGTGTGGTGAAGAC  
GAAGCTAAACTTCGGTAAGCCATGGAAACCGGGCGACTAGAGTGCAGGAGAGGATCGTGGGAATTCATGTGTAGCGGTG  
AATGCGTAGATATAGGAGGAACACCCAGTGGCGAAGGCGACGGTCTGGGCGCAACTGACGCTCATTCCGAAAGCGTGG  
GGAGC  
>ASV:1124:Genus:Flavonifractor  
TACGTAGGTGGCAAGCGTTATCCGGATTTACTGGGTGTAAGGGCGTGTAGGCGGGACTGCAAGTCAGGTGTGAAAACCA  
GGGGCTCAACCTCTGGCCTGCATTTGAAACTGTAGTTCTTGAGTGTGGAGAGGCAATCGGAATTCCTGTGTAGCGGTG  
AATGCGTAGATATACGGAGGAACACCCAGTGGCGAAGGCGGATTGCTGGACAGTAAGTACGCTGAGGCGCGAAAGCGTG  
GGGAG  
>ASV:1125:Family:Lachnospiraceae  
TACGTAGGGGGCAAGCGTTATCCGGATTTACTGGGTGTAAGGGAGCGCAGGCGGCGAGCGCAAGTCAGAAGTGAAGGCC  
GGGGCTTAACCTCGGGACTGCTTTTGAAGTGTGCGGCTAGATTTACGGAGAGGTAAGCGGAATTCCTAGTGTAGCGGTG  
AATGCGTAGATATTAGGAGGAACACCCAGTGGCGAAGGCGGCTTACTGGACTGATAAGTACGCTGAGGCTCGAAAGCGTG

GGGAG  
>ASV:1126:Genus:Anaeroglobus  
TACGTAGGTGGCAAGCGTTGTCCGGAATGATTGGGCGTAAAGGGGCGCGAGGCGGCCGACCAAGTCTGTCTAAAAAGTGC  
GGGGCTTAACCCCGTAGGGGAGAGAACTGGTTGGCTGAGAGTATCGGAGAGGAAAGCGGAATTCCTAGTGTAGCGGTG  
AAATGCGTAGATATTAGGAGGAACACCGTGGCGAAAGCGGCTTTCTGGACGACAACTGACGCTGAGGCGCAAAGCCAG  
GGGAG  
>ASV:1127:Genus:Faecalibacterium  
AACGTAGGTACAAGCGTTGTCCGGAATTAAGGGTGTAAAGGGAGCGAGGCGGGAAGACAAGTTGGAAGTAAAATCTA  
TGGGCTCAACCCATAAACTGCTTTCAAACCTGTTTTCTTGGTAGTGCAGAGGTAGGCGGAATTCCTAGTGTAGCGGTG  
GAATGCGTAGATATCGGAGGAACACCACTGGCGAAGGCGGCTACTGGGCACCAACTGACGCTGAGGCTCGAAAGTGTG  
GGTAG  
>ASV:1128:Family:Lachnospiraceae  
TACGTAGGGGGCAAGCGTTATCCGGATTTACTGGGTGTAAAGGGAGCGAGGCGGATGGCTAAGTCTGATGTGAAAACCC  
GGGGCTCAACCCCGGACTGCATTGAAAAGTGGTTATCTTGGTAGTGCAGAGGTAAGTGAATTCCTAGTGTAGCGGTG  
AAATGCGTAGATATTAGGAGGAACACCACTGGCGAAGGCGGCTTACTGGACGACAACTGACGCTGAGGCTCGAAAGCGTG  
GGGAG  
>ASV:1129:Genus:Prevotella\_2  
TACGGAAGGTCGGGGGTTATCCGGATTTATTGGGTTAAAGGGAGCGTAGGCGCTGTGTTAAGCGTGTGTGAAATGTC  
GGGGCTCAACCTGGGCATTGCAGCGCAACTGGCAGACTTGGTAGTGCAGGGAAGTAGGCGGAATTCGTCGTGTAGCGGTG  
AAATGCTTAGATATGACGAAGAACTCCGATTGCGAAGGCGAGCTGCTGTAGTGAACGACGCTGAAGCTCGAAAGCGTG  
GGTAT  
>ASV:1130:Genus:CAG-56  
TACGTAGGGGGCAAGCGTTATCCGGATTTACTGGGTGTAAAGGGAGCGTAGACGGCGAGGCAAGTCTGATGTGAAAACCC  
GGGGCTCAACCCCGTACTGCATTGAAAAGTGGTTTCTTGGTAGTGCAGGAGGTAAGCGGAATTCCTAGTGTAGCGGTG  
AAATGCGTAGATATTAGGAGGAACACCACTGGCGAAGGCGGCTTACTGGACGCAACTGACGCTGAGGCTCGAAAGCGTG  
GGGAG  
>ASV:1131:Family:Lachnospiraceae  
TACGTATGGTCAAGCGTTATCCGGATTTACTGGGTGTAAAGGGAGCGTAGACGGATAGGCAAGTCTGGAGTAAAACCC  
GGGGCTCAACCCCGGACTGCTTTGAAAAGTGGTTATCTAGAGTGCAGGAGGTAAGTGAATTCCTAGTGTAGCGGTG  
AAATGCGTAGATATTAGGAGGAACACCACTGGCGAAGGCGGCTTACTGGACAGTAACTGACGCTGAGGCTCGAAAGCGTG  
GGGAG  
>ASV:1132:Genus:Parabacteroides  
TACGAGGATCCGAGCGTTATCCGGATTTATTGGGTTAAAGGGTGCAGGCGCCTTTTAAGTCAAGCGGTGAAAAGTCT  
GTGGCTCAACCATAGAATTGCCGTTGAAAAGTGGAGGCTTGGTAGTGTGGGGCAGGCGGAATGCGTGGTGTAGCGGTG  
AAATGCTTAGATATCAGGAAGAACTCCGATTGCGAAGGCGAGCTGCTAAGCTGCAACTGACGCTGAGGCTCGAAAGTGTG  
GGTAT  
>ASV:1133:Genus:Lachnospiraceae\_NK4A136\_group  
TACGTAGGGGGCAAGCGTTATCCGGATTTACTGGGTGTAAAGGGAGCGTAGACGGTTTTGCAAGTCTGAAGTAAAACCC  
GGGGCTTAACCCCGGACTGCTTTGAAAAGTGTAGAAGTGCAGGAGGTAAGTGAATTCCTAGTGTAGCGGTG  
AAATGCGTAGATATTAGGAGGAACACCACTGGCGAAGGCGGCTTACTGGACTGTAACGACGCTGAGGCTCGAAACCGTG  
GGGAG  
>ASV:1134:Genus:Lachnospiraceae\_UCG-001  
TACGTAGGGGGCAAGCGTTATCCGGATTTACTGGGTGTAAAGGGAGCGAGGCGGTGCGGCAAGTCAAGTGTGAAAACCC  
GGGGCTCAACCTCGGACTGCATTGAAAAGTGTGGACTAGAGTGCAGGAGGTAAGTGAATTCCTAGTGTAGCGGTG  
AAATGCGTAGATATTAGGAGGAACACCACTGGCGAAGGCGGCTTACTGGACGTTAAGTGAACGCTGAGGCTCGAAAGCGTG  
GGGAG  
>ASV:1135:Species:alkanovora/aloverae/antarcticus/cohnii/endophyticus/flavus/indicus/luteus/  
lylae/thailandicus/yunnanensis  
TACGTAGGGTGCAGCGTTATCCGGAATTTATTGGGCGTAAAGAGCTCGTAGGCGGTTTGTCCGCTGTGTGAAAAGTCC  
GGGGCTTAACCCCGATCTGCGGTGGGTACGGGCAGACTAGAGTGCAGTAGGGGAGACTGGAATTCCTGGTGTAGCGGTG  
GAATGCGCAGATATCAGGAGGAACACCGATGGCGAAGGCGAGTCTCTGGGCTGTAACGACGCTGAGGAGCGAAAGCATG  
GGGAG  
>ASV:1136:Genus:Erysipelotrichaceae\_UCG-003  
TACGTAGGTGGCGAGCGTTATCCGGAATTTATTGGGCGTAAAGAGGAGCGAGGCGGCACTAAGGGTCTGTGGTAAAAGATC  
GAAGCTTAACCTCGGTAAGCCATGGAACCGTAGAGCTAGAGTGTGTGAGAGGATCGTGAATTCATGTGTAGCGGTGA  
AATGCGTAGATATAGGAGGAACACCACTGGCGAAGGCGAGCATCTGGCACATAACTGACGCTCAGTCCCGAAAGCGGTG  
GGAGC  
>ASV:1137:Order:Clostridiales  
TACGTAGGGGGCGAGCGTTGTCCGGAATTAAGGGTGTAAAGGGTGCAGGCGGCTTTTAAGTTGGATGTGAAAATCCC  
CGGGCTTAACCTGGGCTGTGCATCAAATACTGGGAGACTAGAGTGCAGGAGAGGGAAGCGGAATTCCTAGTGTAGCGGTG  
AAATGCGTAGATATTAGGAGGAACACCACTGGCGAAGGCGGCTTTCTGGACTGTAACGACGCTGAGGACGAAAGCGGTG  
GGGAG  
>ASV:1138:Genus:Faecalibacterium  
AACGTAGGTACAAGCGTTGTCCGGAATTAAGGGTGTAAAGGGAGCGAGGCGGGAAGACAAGTTGGAAGTAAAATCTA  
TGGGCTCAACCCATAAACTGCTTTCAAACCTGTTTTCTTGGTAGTGCAGAGGTAGGCGGAATTCCTAGTGTAGCGGTG  
GAATGCGTAGATATCGGAGGAACACCACTGGCGAAGGCGGCTTACTGGGCACCAACTGACGCTGAGGCTCGAAAGTGTG  
GGTAG  
>ASV:1139:Genus:Ruminiclostridium\_5

TACGTAGGGAGCAAGCGTTGTCCGGATTTACTGGGTGTAAAGGGTGCCTAGGCGGTTCCGGCAAGTCAGAAGTAAAATCCA  
TGGGCTTAACCCATGAAGTCTTTTAAAAGTGTCAAGTTCAGTGAAGTAGAGGTAGGCGGAATTCCTGGTGTAGCGGTG  
AAATGCGTAGAGATCGGGAGGAACACCAGTGGCGAAGGCGGCTACTGGCTTTAACTGACGCTGAGGCACGAAAGCATG  
GGTAG  
>ASV:1140:Genus:Romboutsia  
TACGTAGGGGCTAGCGTTATCCGGAATTACTGGGCGTAAAGGGTGCCTAGGTTGGTTTCTTAAGTCAGAGGTAAAAGGCT  
ACGGCTCAACCGTAGTAAGCCTTTGAAACTGGGAACTTGTAGTGCAGGAGAGAGAGTGAATTCCTAGTGTAGCGGTGA  
AATGCGTAGATATTAGGAGGAACACCAGTGGCGAAGGCGGCTCTCTGGACTGTGACTGACACTGAGGCACGAAAGCGTGG  
GGAGC  
>ASV:1141:Genus:Faecalibacterium  
AACGTAGGTCACAAGCGTTGTCCGGAATTACTGGGTGTAAAGGGAGCGCGGGCGGAAAACAAGTTGGAAGTAAAATCCA  
TGGGCTCAACCCATGAAGTCTTTCAAAGTGTCTTTCTTGTAGTGTGACAGGTAGGCGGAATTCCTGGTGTAGCGGTG  
GAATGCGTAGATATCGGGAGGAACACCAGTGGCGAAGGCGGCTACTGGGCACCAACTGACGCTGAGGCTCGAAAGTGTG  
GGTAG  
>ASV:1142:Genus:Silanimonas  
TACGAAGGGTGAAGCGTTACTCCGGAATTACTGGGCGTAAAGCGTGCCTAGGCGGTTCTTAAGTCTGACGTAAAATCCC  
CGGGCTCAACCTGGGACGTGCGTTGGAAGTGGCGATCTAGAGTACGGTAGAGGGTGGTGAATTCCTGGTGTAGCAGTG  
AAATGCGTAGAGATCGGGAGGAACACTCGTGGCGAAGGCGGCGCACCTGGACCAGTACTGACGCTGAGGCACGAAAGCGTG  
GGGAG  
>ASV:1143:Species:ghonii/sordellii  
TACGTAGGGGCTAGCGTTATCCGGAATTACTGGGCGTAAAGGGTGCCTAGGCGGTTCTTCAAGCCAGAAGTAAAAGGCT  
ACGGCTCAACCGTAGTAAGCCTTTGAAACTGTAGGACTTGTAGTGCAGGAGAGAGAGTGAATTCCTAGTGTAGCGGTGA  
AATGCGTAGATATTAGGAGGAACACCAGTGGCGAAGGCGGCTCTCTGGACTGTAAGTGTGACTGAGGCACGAAAGCGTGG  
GGAGC  
>ASV:1144:Species:aryabhattai/bingmayongensis/cereus/flexus/ginsengisoli/horikoshii/  
huizhouensis/licheniformis/megaterium/meqaterium/oryzaecorticis/pumilus/qingshengii/simplex/  
subtilis/thuringiensis  
TACGTAGGTGGCAAGCGTTATCCGGAATTATTGGGCGTAAAGCGCGCAGGCGGTTTCTTAAGTCTGATGTAAAAGCCC  
ACGGCTCAACCGTGGAGGGTATTGGAAGTGGGAACTTGTAGTGCAGAAAGAAAAGCGGAATTCACGTGTAGCGGTG  
AAATGCGTAGAGATGTGGAGGAACACCAGTGGCGAAGGCGGCTTTTGGTCTGTAAGTGTGACGCTGAGGCACGAAAGCGTG  
GGGAG  
>ASV:1145:Genus:Ruminococcaceae\_UCG-014  
TACGTAGGGAGCAAGCGTTATCCGGAATTTATTGGGTGTAAAGGGTGCCTAGGCGGTAATGCAAGTGTAGTGTAAAATCCC  
TCGGCTTAACCGAGGAAGTGAAGTAAACTACATTTCTTGTAGTGTGGAGAGGAAAGTGAATTCCTAGTGTAGCGGTG  
AAATGCGTAGATATTAGGAGGAACACCAGTGGCGAAGGCGACTTTCTGGACAACACTGACGCTGAGGCACGAAAGCGTG  
GGGAG  
>ASV:1146:Genus:Bacteroides  
TACGGAGGATCCGAGCGTTATCCGGAATTTATTGGGTTAAAGGGAGCGTAGATGGATGTTTAAAGTCAAGTGTGAAAAGTTT  
GCGGCTCAACCGTAAAATTGACGTTGATACTGGATATCTTGTAGTGCAGTTGAGGCAGGCGGAATTCCTGGTGTAGCGGTG  
AAATGCTTAGATATACGAAGAACTCCGATTGCGAAGGCGAGCCTGCTAAGCCATGACTGACGCTGATGCACGAAAGCGTG  
GGGAT  
>ASV:1147:Genus:Family\_XIII\_UCG-001  
TACGTAGGGGGCAAGCGTTGTCCGGAATTTATTGGGCGTAAAGAGTACGTAGGCGGTTCTGTAAGCGCAAGGTAAAAGGCA  
TAGGCTCAACCAATGTGAGCTTGGCAACTGTGAGTGTGAGTGCAGGAGGGGAAAGTGAATTCCTAGTGTAGCGGTGA  
AATGCGTAGATATTAGGAGGAACACCAGTGGCGAAGGCGACTTTCTGGACTGTAAGTGTGACTGAGGCACGAAAGCGTGG  
GGAGC  
>ASV:1148:Species:piger  
TACGGAGGGTGAAGCGTTAATCGGAATCACTGGGCGTAAAGCGCACGTAGGCTGTTATGTAAGTCAGGGGTAAAAGCCC  
ACGGCTCAACCGTGGAACTGCCCTTGATACTGCACGACTCGAATCCGGGAGAGGGTGGCGGAATTCAGGTGTAGGAGTG  
AAATCCGTAGATATCTGGAGGAACATCAGTGGCGAAGGCGGCGCACCTGGACCAGTATTGACGCTGAGGTGCGAAAGCGTG  
GGGAG  
>ASV:1149:Species:kalixensis  
TACGTAGGTGGCAAGCGTTGTCCGATTTATTGGGCGTAAAGCGAGCGCAGGCGGAGAAATAAGTCTGATGTGAAAAGCCC  
ACGGCTCAACCGTGGAACTGCATCGGAAACTGTTTTCTTGTAGTGCAGAAAGAGAGTGAAGTCCATGTGTAGCGGTG  
GAATGCGTAGATATATGGAAGAACACCAGTGGCGAAGGCGGCTCTCTGGTCTGCAACTGACGCTGAGGCTCGAAAGCATG  
GGTAG  
>ASV:1150:Genus:Ruminiclostridium\_5  
TACGTAGGGAGCAAGCGTTGTCCGATTTACTGGGTGTAAAGGGTGCCTAGGCGGAAGAGCAAGTCAAGTGTGAAATCTG  
GGGGCTTAACCCCAAAGTGTATTGAAACTGTTCTTCTTGTAGTGGAGTAGAGGTAGGCGGAATTCCTGGTGTAGCGGTG  
AAATGCGTAGAGATCGGGAGGAACACCAGTGGCGAAGGCGGCTACTGGGCTTAAGTGTGACGCTGAGGCACGAAAGCGTG  
GGTAG  
>ASV:1151:Genus:Cloacibacterium  
TACGGAGGGTGAAGCGTTATCCGATTTATTGGGTTAAAGGGTCCGTAGGCGGACTTATAAGTCAAGTGTGAAAAGCCT  
GTCGCTTAACCATAGAACTGCCATTGATACTGTAAGTCTTGTAGTATATTTGAGGTAGCTGGAATAAGTGTAGCGGTG  
AAATGCATAGATATTACTTAGAACCAATTGCGAAGGCGAGTTACCAAGATATAACTGACGCTGAGGGACGAAAGCGTG  
GGGAG  
>ASV:1152:Genus:Family\_XIII\_UCG-001  
TACGTAGGGGGCGAGCGTTGTCCGGAATTTATTGGGCGTAAAGAGTACGTAGGCGGTTTCTAAGCGCAAGGTAAAAGGCA

GTGGCTTAACCATTGTAAGCCTTGCGAACTGGCAGACTTGAGTGCAGGAGAGGAAAGCGGAATTCCTAGTGTAGCGGTGA  
AATGCGTAGATATTAGGAGGAACACCGGTGGCGAAGGCGGCTTTCTGGACTGTAAGTACGCTGAGGTACGAAAGCGTGG  
GGAGC

>ASV:1153:Genus:Prevotella\_9

TACGGAAGGTCCGGCGTTATCCGGATTTATTGGGTTTAAAGGGAGCGTAGGCCGAGATTAAGCGTGTGTGAAATGTA  
GATGCTCAACATCTGAACTGCAGCGCAACTGGTTTCTTGGTACGCACAAAGTGGCGGAATTCGTGGTGTAGCGGTG  
AAATGCTTAGATATCACGAAGAACCCCGATTGCGAAGGCAGCCTGCTAAGCCGCCACTGACGTTGAGGCTCGAAAGTGGC  
GGTAT

>ASV:1154:Species:urinaeequi/viridans

TACGTAGGTGGCAAGCGTTGTCCGGATTTATTGGGCGTAAAGGGAGCGCAGGTGGTTTCTTAAGTCTGATGTGAAAGCCC  
ACGGCTTAACCGTGGAGGGTCAATTGGAAGTGGGAACTTGGTACAGAAGAGGAATGTGAACTCCATGTGTAGCGGTG  
GAATGCGTAGATATATGGAAGAACCACAGTGGCGAAGGCGACATTCTGGTCTGTTACTGACACTGAGGCTCGAAAGCGTG  
GGGAG

>ASV:1155:Family:Ruminococcaceae

TACGTAGGTGGCAAGCGTTGTCCGGATTTACTGGGTGTAAGGGAGCGTAGGCCGGAGTGAAGTTGAATGTGAAAACGA  
TGGGCTCAACCCATCGTTGCGTTCAAAGTGCATTTCTTGGTGAAGTAGAGGTAAGCGGAATTCCTAGTGTAGCGGTG  
AATGCGTAAATATTAGGAGGAACACCAGTGGCGAAGGCGGCTTACTGGGCTTAACTGACGCTGAGGCTCGAAAGCGTGG  
GTAGC

>ASV:1156:Family:Peptococcaceae

TACGTAGGGGGCGAGCGTTGTCCGGAACTCACTGGGCGTAAAGGGCGCGTAGGCCGTTTAAATAAGTCAAGTGGTAAAACCT  
GGGGCTCAACCCGAGCCTGCCACTGATACTGTTAGACTTGGTATGGAAGAGGAGAATGGAATTCCTAGTGTAGCGGTG  
AAATGCGTAGATATTAGGAGGAACACCAGTGGCGAAGGCGATTCTCTGGCCAAGACTGACGCTGAGGCGCGAAAGCGTG  
GGGAG

>ASV:1157:Genus:Barnesiella

TACGGAGGATGCAAGCGTTATCCGGATTTATTGGGTTTAAAGGGTGCCTAGGCCGACGCCAAGTCAAGCGGTGAAATTC  
CGGGCTCAACCCGACTGTGCCGTTGAAACTGGCGAGCTAGAGTGCACAAGAGGCGAGCGGAATGCGTGGTGTAGCGGTG  
AAATGCATAGATATCACGCAGAACCCCGATTGCGAAGGCAGCCTGCTAGGGTAAACAGACGCTGAGGCACGAAAGCGTG  
GGTAT

>ASV:1158:Genus:Staphylococcus

TACGTAGGTGGCAAGCGTTATCCGGAACTTATTGGGCGTAAAGCGCGCTAGGCCGTTTCTTAAGTCTGATGTGAAAGCCC  
ACGGCTCAACCGTGGAGGGTCAATTGGAAGTGGGAACTTGGTACAGAAGAGGAAAGTGGAAATTCATGTGTAGCTGTG  
AAATGCGCAGAGATATTAGGAGGAACACCAGTGGCGAAGGCGACTTTCTGGTCTGTAACGACGCTGATGTGCGAAAGCGTG  
GGGAT

>ASV:1159:Genus:Tyzzerella\_4

TACGTAGGGGGCAAGCGTTATCCGGATTTACTGGGTGTAAGGGAGCGTAGACGGTTATGTAAGTCTGATGTGAAAACCC  
GGGGCTCAACCCGGGACTGCATTGGAACATGTAAGTGTGCGGAGAGGTAAGTGGAAATTCCTAGTGTAGCGGTG  
AAATGCGTAGATATTAGGAGGAACACCAGTGGCGAAGGCGGCTTACTGGACGATCACTGACGTTGAGGCTCGAAAGCGTG  
GGGAG

>ASV:1160:Genus:Coproccoccus\_3

TACGTATGGTCAAGCGTTATCCGGATTTACTGGGTGTAAGGGAGCGTAGACGGCTGTGTAAGTCTGGAGTAAAAGCCC  
GGGGCTCAACCCGGGACTGCTTTGGAACATGCAAGTGTGCGGAGAGGTAAGTGGAAATTCAGTGTAGCGGTG  
AAATGCGTAGATATTGGGAGGAACACCAGTGGCGAAGGCGGCTTACTGGACGATGACTGACGTTGAGGCTCGAAAGCGTG  
GGGAG

>ASV:1161:Family:Ruminococcaceae

TACGTAGGTGGCAAGCGTTATCCGGAACTTATTGGGTGTAAGGGTGCCTAGGCCGGATGTAAGTCAAGTGTGAAATTC  
GGAGCTCAACTTCTGAACTGCATTTGAACTTACGTTCTTGGTGAAGTAGAGGCAAGCGGAATTCAGTGTAGCGGTG  
AAATGCGTAGATATTGGGAGGAACACCAGTGGCGAAGGCGGCTTCTGGGCTTAAACTGACGCTGAAGCACGAAAGTGTG  
GGGAG

>ASV:1162:Class:Clostridia

TACGTAGGGGGCGAGCGTTGTCCGGAACTTACTGGGCGTAAAGGGTGCCTAGGCCGTTGCTTAAGTTGGATGTGAAATACC  
CGGGCTTAACCTGGGGGTGCATTCAAAGTGGGCGACTAGAGTTACAGGAGAGGAAAGCGGAATTCCTAGTGTAGCGGTG  
AAATGCGTAGATATTAGGAGGAACACCAGTGGCGAAGGCGGCTTTCTGGACTGACACTGACGCTGAGGCACGAAAGCGTG  
GGGAG

>ASV:1163:Genus:Bacteroides

TACGGAGGATCCGAGCGTTATCCGGATTTATTGGGTTTAAAGGGAGCGTAGGTGGACATGTAAGTCAAGTGTGAAAGTTT  
GCGGCTCAACCGTAAATGCAAGTGTGATACTGTGTCTTGGTACAGTAGAGGTGGCGGAATTCGTGGTGTAGCGGTG  
AAATGCTTAGATATCACGAAGAACCTCGATTGCGAAGGCAGCTCACTGGACTGGTAACTGACACTGAGGCTCGAAAGTGT  
GGTA

>ASV:1164:Species:subterraneum/yangbajingensis

TACGGAGGGAGCTAGCGTTGTTCCGAACTTACTGGGCGTAAAGCGCGCTAGGCCGCTACTCAAGTCAAGGTTGAAAGCCC  
GGGGCTCAACCCGGAAGTGCCTTTGAACTAGGTGGCTAGAATCTTGGAGAGGTCAAGTGGAAATTCAGTGTAGAGGTG  
AAATTCGTAGATATTGGAAGAACCACAGTGGCGAAGGCGACTGACTGGACAAGTATTGACGCTGAGGTGCGAAAGCGTG  
GGGAG

>ASV:1165:Species:piscolens

TACGTAGGGAGCGAGCGTTGTCCGGAACTTACTGGGCGTAAAGGGCGCGTAGGCCGGCTTCAAGTCTGTCTCAAAGCC  
GAGGCTCAACCTCGGGCGCGCAGACGAACTGGAGAGCTTGGAAAGCAGAGAGGCAAACAGAATTCCTGGTGTAGCGGTG  
AATGCGTAGATATCAGGAAGAATACCAGTGGCGAAGGCGGTTTCTGGCTGCATACTGACGCTGAAGCGCGAAAGCCAGG  
GGAGC

>ASV:1166:Genus:Butyricimonas  
CACGGGGGATGCGAGCGTTATCCGGATTTATTGGGTTAAAGGGCGCGTAGGCGGGATGCCAAGTCAGCGGTAAAAGACT  
GCAGCTAAACTGTAGCACGCCGTTGAAACTGGTGACCTCGAGACGAGTCGAGGATGGCGGAACAAGTGAAGTAGCGGTGA  
AATGCTTAGATATCACTTGGAAACCCGATAGCGAAGGCAGCTGTCCAGACTCGATCTGACGCTGATGCGCGAGAGCGTGG  
GTAGC

>ASV:1167:Order:Clostridiales  
TACGTAGGGGGCGAGCGTTGTCCGGAATTATTGGGCGTAAAGGGCGCGTAGACGGCTGTGTAAGTTATAGGTGAAAGCCC  
AACTTTCAAGTTGGAAGTGCCTGTAATACTGCATGGCTTGAGTGCAGAGAGGGGAAGCGGAATTCCTAGTGTAGCGGTG  
AAATGCGTAGATATTAGGAGGAACACCAGTGGCGAAGGCGGCTTTCTGGACTGTAACCTGACGTTGAGGCGCAAGCGTG  
GGGAG

>ASV:1168:Species:morganii  
TACGGAGGGTGAAGCGTTAATCCGGAATTACTGGGCGTAAAGCGCACGAGGCGGTTGATTGAGTCAGATGTGAAATCCC  
CGGGCTTAACCCGGGAATTGCATCTGATACTGGTACAGCTAGAGTCTTGTAGAGGGGGTAGAATTCATGTGTAGCGGTG  
AAATGCGTAGAGATGTGGAGGAATACCGTGGCGAAGGCGGCCCTGGACAAGACTGACGCTCAGGTGCGAAAGCGTG  
GGGAG

>ASV:1169:Species:brevis/casei/pantheris/rhannosus  
TACGTAGGTGGCAAGCGTTATCCGGATTTATTGGGCGTAAAGCGAGCGCAGGCGGTTTTTAAGTCTGATGTGAAAGCCC  
TCGGCTTAACCCGGGAATTGCATCTGATACTGGTACAGCTAGAGTGCAGAGAGGGGATGGAATTCATGTGTAGCGGTG  
AAATGCGTAGATATATGGAAGAACACCAGTGGCGAAGGCGGCTGTCTGGTCTGTAACCTGACGCTGAGGCTCGAAAGCATG  
GGTAG

>ASV:1170:Genus:Lachnospiraceae\_UCG-001  
TACGTAGGGGGCAAGCGTTATCCGGATTTACTGGGTGTAAGGGGAGCGCAGGCGGCTGGCAAGTCTGATGTGAAATCCC  
GGGGCTCAACTCCGGAAATTCATCTGATACTGGTACAGCTAGAGTGCAGAGAGGGTAAGTGGAAATTCCTAGTGTAGCGGTG  
AAATGCGTAGATATTAGGAGGAACACCAGTGGCGAAGGCGGCTTACTGGACGTAACCTGACGCTGAGGCTCGAAAGCGTG  
GGGAG

>ASV:1171:Species:cylindroides  
TACGTAGGTGGCGAGCGTTATCCGGAATGATTGGGCGTAAAGGGTGCCTAGGCGGCCGTTAAGTCTGGAGTCAAAGCCG  
GCAGCTCAACTCCGGAAATTCATCTGATACTGGTACAGCTAGAGTGCAGAGAGGGGATGGAATTCATGTGTAGCGGTAA  
AATGCGTAGATATATGGAAGAACACCAGTGGCGAAGGCGGCTGTCTGGTCTGCAACTGACGCTGAGGCTCGAAAGCGTG  
GGAGC

>ASV:1172:Family:Lachnospiraceae  
TACGTAGGGGGCAAGCGTTATCCGGATTTACTGGGTGTAAGGGGAGCGTAGACGGCACAGCAAGTCTGAAGTGAATCCC  
CGGGCTCAACCCGGGAATTCATCTGATACTGGTACAGCTAGAGTGCAGAGAGGGTAAGTGGAAATTCCTAGTGTAGCGGTG  
AAATGCGTAGATATTAGGAGGAACACCAGTGGCGAAGGCGGCTTCTGGACAATCACTGACGTTGAGGCTCGAAAGCGTG  
GGGAG

>ASV:1173:Genus:Lachnoclostridium  
TACGTAGGGGGCAAGCGTTATCCGGATTTACTGGGTGTAAGGGGAGCGTAGACGGCAAAGCAAGTCTGAAGTGAAGGCC  
GGGGCTCAACCCGGGACTGCTTTGGAAGTGTCTGCTAGAGTGCAGAGAGGGTAAGCGGAATTCCTAGTGTAGCGGTG  
AAATGCGTAGATATTAGGAGGAACACCAGTGGCGAAGGCGGCTTACTGGACAGTAACCTGACGTTGAGGCTCGAAAGCGTG  
GGGAG

>ASV:1174:Family:Ruminococcaceae  
TACGTAGGGAGCGAGCGTTATCCGGATTTACTGGGTGTAAGGGTGCCTAGGCGGGATGGCAAGTCAAGTGTGAAATGCC  
GGGGCTCAACTCCGAGCTGCATTTGAAACTGTCTTCTGAGTGAAGTAGAGGCGAGCGGAATTCCTAGTGTAGCGGTG  
AAATGCGTAGATATTAGGAGGAACACCAGTGGCGAAGGCGGCTGTCTGGGCTTAACTGACGCTGAGGACGAAAGCATG  
GGGAG

>ASV:1175:Species:choerinum/pseudolongum  
TACGTAGGGTGAAGCGTTATCCGGATTTATTGGGCGTAAAGGGGCTCGTAGGCGGTTGTCGCGTCCGGTGTGAAAGTCC  
ATCGCTTAACCGTGGATCCGCGCCGGGTACGGGCGGGCTTGAAGTGCAGGAGGGGACTGGAATTCCTAGTGTAGCGGTG  
GAATGCTAGATATCGGGAAGAACACCAGTGGCGAAGGCGGCTTCTGGGCTTAACTGACGCTGAGGACGAAAGCGTG  
GGGAG

>ASV:1176:Genus:Kingella  
TACGTAGGGTGCAGCGTTAATCCGGAATTACTGGGCGTAAAGCGAGCGCAGCGGTTTGATAAGCAGGATGTGAAATCCC  
CGGGCTTAACCTGGGAAGTGCCTTCTGAACTGTCAGGCTAGAGTATGTCAGAGGGGGTAGAATTCACGCTGATGAGTGT  
AAATGCGTAGAGATGTGGAGGAATACCGATGGCGAAGGCGGCCCCCTGGGATAATACTGACGTTGATGCTCGAAAGCGTG  
GGTAG

>ASV:1177:Genus:Faecalibacterium  
AACGTAGGTCAACAGCGTTATCCGGATTTACTGGGTGTAAGGGGAGCGCAGGCGGGAAGACAAGTTGGAAGTGAATCTA  
TGGGCTTAACCCATAAACTGCTTTCAAAGTGTCTTCTGAGTGTGAGGAGGAGGAGGAGGAGGAGGAGGAGGAGGAGGAGG  
GAATGCGTAGATATCGGGAGGAACACCAGTGGCGAAGGCGGCTTACTGGGCACCAACTGACGCTGAGGCTCGAAAGTGTG  
GGTAG

>ASV:1178:Genus:DTU089  
TACGTAGGGAGCAAGCGTTGTCCGGATTTACTGGGTGTAAGGGTGCCTAGGCGGATCTGCAAGTCAAGTGTGAAATCCC  
AGGGCTCAACCTGGAAGTGCATTTGAAACTGTGGTCTTGAAGTGTGAGGAGGAGGAGGAGGAGGAGGAGGAGGAGGAGG  
AAATGCGTAGAGATCGGGAGGAACACCAGTGGCGAAGGCGGCTTCTGGGCTTAACTGACGCTGAGGACGAAAGCATG  
GGTAG

>ASV:1179:Genus:Dielma  
TACGTAGGTGGCAAGCGTTATCCGGAATTATTGGGCGTAAAGGGTGCCTAGGCGGCGAGATAAGTCTGAGGTAAAAGCCC  
GTGGCTCAACACCGGTAAGCCTTGGAAACTGTCTGGTGGAGTGCAGGAGAGGACAATGGAATTCATGTGTAGCGGTAA

AATGCGTAGATATATGGAGGAACACCAGTGGCGAAGGCGGTTGTCTGGCCTGTAAGTACGCTGAAGCACGAAAGTGTGG  
GGAG  
>ASV:1180:Genus:Anaerostipes  
TACGTAGGGGGCAAGCGTTATCCGGAATTTACTGGGTGTAAGGGTGTGTAGGTGGTATGGCAAGTCAGAAGTAAAACCC  
AGGGCTTAACCTGGGACTGCTTTTAAAAGTGTGACTGGAGTGCAGGAGAGGTAAGCGGAATTCCTAGTGTAGCGGTG  
AAATGCGTAGATATTAGGAGGAACACCATAGTGGCGAAGGCGGCTTACTGGACTGAAACTGACTGAGGCACGAAAGCGTG  
GGAG  
>ASV:1181:Genus:Ruminococcaceae\_UCG-005  
TACGTAGGTGGCAAGCGTTGTCCGGATTTACTGGGTGTAAGGGCGGTAGGCGGGAAGACAGGTGAGTGTGAAATGTC  
GGGGCTCAACCCGGAAGTGCATTTGAAACCGTTTTCTTGAGTATCGGAGAGGCAGGCGGAATTCCTAGTGTAGCGGTG  
AAATGCGTAGATATTAGGAGGAACACCAGTGGCGAAGGCGGCTGCTGGACGACAACGACGCTGAGGCAGCAAGCGGTG  
GGAG  
>ASV:1182:Species:luti  
TACGTAGGGGGCAAGCGTTATCCGGAATTTACTGGGTGTAAGGGAGCGTAGACGGTGTGGCAAGTCTGATGTGAAAGGCA  
TGGGCTCAACCTGTGGACTGCATTGAAACTGCCATACTTGGTGGAGGGGTAAGCGGAATTCCTAGTGTAGCGGTG  
AAATGCGTAGATATTAGGAGGAACACCAGTGGCGAAGGCGGCTTACTGGACGTAACGACGTTGAGGCTCGAAAGCGTG  
GGAG  
>ASV:1183:Genus:Ruminococcaceae\_UCG-005  
TACGTAGGTGGCAAGCGTTGTCCGGATTTACTGGGTGTAAGGGCGGTAGGCGGAGATTCAAGTCAGGAGTGAATCTA  
TGGGCTTAACCCATAAACTGCTTTTAAAAGTGAATCCCTTGGTGGAGAGGCAGGCGGAATTCCTAGTGTAGCGGTG  
AAATGCGTAGATATTAGGAGGAACACCAGTGGCGAAGGCGGCTGCTGGACGACAACGACGCTGAGGCAGCAAGCGGTG  
GGAG  
>ASV:1184:Genus:Faecalibacterium  
AACGTAGGTGCAAGCGTTGTCCGGAATTTACTGGGTGTAAGGGAGCGCAGGCGGGAAGACAAGTTGGAAGTGAATCCA  
TGGGCTCAACCCATGAAGTGCATTTAAAAGTGTCTTGGTGGAGAGGTAGGCGGAATTCCTAGTGTAGCGGTG  
GAATGCGTAGATATTGGGAGGAACACCAGTGGCGAAGGCGGCTTACTGGGCACTAAGTACGCTGAGGCTCGAAAGGTG  
GGTAG  
>ASV:1185:Family:Lachnospiraceae  
TACGTATGGAGCAAGCGTTATCCGGAATTTACTGGGTGTAAGGGTGCAGTGGTGGCAGTGTAAAGTCAAGTGTGAAAGGCC  
GGGGCTCAACCCGGAGCTGCATTTGAAACTGCTCGGCTAGAGTACAGGAGAGGCAGGCGGAATTCCTAGTGTAGCGGTG  
AAATGCGTAGATATTAGGAGGAACACCAGTGGCGAAGGCGGCTGCTGGACTGTTACTGACTGAGGCACGAAAGCGTG  
GGAG  
>ASV:1186:Genus:Dorea  
TACGTAGGGGGCAAGCGTTATCCGGAATTTACTGGGTGTAAGGGAGCGTAGACGGTGTGCAAGTCTGAAGTGAAGGCA  
TGGGCTCAACCTGTGGACTGCTTTGAAACTGTGCGCTAGAGTGTGCGGAGAGGTAAGTGAATTCCTAGTGTAGCGGTG  
AAATGCGTAGATATTAGGAGGAACACCAGTGGCGAAGGCGGCTTACTGGACGATGACTGACGTTGAGGCTCGAAAGCGTG  
GGAG  
>ASV:1187:Genus:Ruminococcaceae\_UCG-005  
TACGTAGGTTGCAAGCGTTGTCCGGAATTTACTGGGTGTAAGGGCGGTAGGCGGAGCTGCAAGTCAAGTGTGAAATCCC  
GGGGCTCAACCCGGAAGTGCATTTGAAACTGTAGCCCTTGGTGGAGAGGCAAGCGGAATTCCTAGTGTAGCGGTG  
AAATGCGTAGATATTAGGAGGAACACCAGTGGCGAAGGCGGCTTACTGGACGACAACGACGCTGAGGCAGCAAGCGTG  
GGAG  
>ASV:1188:Family:Lachnospiraceae  
TACGTAGGGGGCAAGCGTTATCCGGAATTTACTGGGTGTAAGGGAGCGTAGACGGATGTGCAAGTCTGAAGTGAAGGCC  
GGGGCTCAACCCGGGACTGCTTTGAAACTGTGTATCTAGAGTGCAGGAGAGGTAAGCGGAATTCCTAGTGTAGCGGTG  
AAATGCGTAGATATTGGGAGGAACACCAGTGGCGAAGGCGGCTTACTGGACGTAACGACGTTGAGGCTCGAAAGCGTG  
GGAG  
>ASV:1189:Family:Ruminococcaceae  
TACGTAGGGAGCAAGCGTTGTCCGGAATTTACTGGGTGTAAGGGTGCAGTGGCGGGCTTGAAGTCAAGTCAAGTCAAGTCCC  
GGGGCTTAACCCGTTGGACTGCGGTAGAACTGTGAGTCTTGGTGGAGAGGTAAGCGGAATTCCTAGTGTAGCGGTG  
GAAATGCGTAGAGATCGGGAGGAACACCAGTGGCGAAGGCGGCTTACTGGGCTTTAACTGACGCTGAGGCACGAAAGTGT  
GGTA  
>ASV:1190:Species:avium/devriesei/faecium/gilvus/hawaiiensis/hermanniense/hirae/malodoratus/  
pallens/pseudoavium/raffinosis/viikkiensis/xiangfangensis  
TACGTAGGTGGCAAGCGTTGTCCGGAATTTATTGGGCGTAAAGCGAGCGCAGGCGGTTTCTTAAGTCTGATGTGAAAGCCC  
CCGGCTCAACCGGGAGGCTATTGAAACTGGAAACTTGGTGGAGAGGAGAGTGAATTCCTAGTGTAGCGGTG  
AAATGCGTAGATATATGGAGGAACACCAGTGGCGAAGGCGGCTCTCTGGTCTGTAACGACGCTGAGGCTCGAAAGCGTG  
GGAG  
>ASV:1191:Genus:Butyricimonas  
TACGGGGGATGCGAGCGTTATCCGGAATTTATTGGGTTTAAAGGGCGGTAGGCGGGACGTCAGTCAAGTCAAGTCAAGTCCC  
GCAGTAAACTGTAGCACCGGTTGAAACTGGCGACTGGAGACGAGACGAGGAGGCGGAACAAGTGAAGTAGCGGTGA  
AATGCATAGATACACTTGAACCCCGATAGCGAAGGCGAGCTTCCAGGCTCGTTCTGACGCTGATGCGCGAGAGCGTGG  
GTAGC  
>ASV:1192:Species:chelonae/insubricum/llatzerense/mucogenicum/phlei/phocaicum/tuberculosis  
TACGTAGGGTGCAGCGTTGTCCGGAATTTACTGGGCGTAAAGAGTCTGAGTGGTGGTTGTCGCGTTGTTCTGTGAAACTC  
ACAGTAACTGTGGGCGTGGCGGATACGGGCGACTAGAGTACTGCAGGGGAGACTGGAATTCCTGGTGTAGCGGTG  
GAATGCGTAGATATCAGGAGGAACACCAGTGGCGAAGGCGGCTCTCTGGCAGTAACTGACGCTGAGGAGCGAAAGCGTG  
GGAG



>ASV:1193:Species:diminuta/terrae  
TACGAAGGGGGCTAGCGTTGCTCGGAATTACTGGGCGTAAAGGGCGCGTAGGCGGATCGTTAAGTCAGAGGTGAAATCCC  
GGAGCTCAACTTCGGAACGCTTTGATACTGGCGATCTTGAGTGTGAGAGAGGTATGTGGAACCTCCGAGTGTAGAGGTG  
AAATTCGTAGATATTCGGAAGAACCACAGTGGCGAAGGCGACATACTGGCTCATTACTGACGCTGAGGCGCAAAGCGTG  
GGGAG

>ASV:1194:Order:Izimaplasmatales  
TACATAGGGGGCAAGCGTTATCCGGAATTATTGGGCGTAAAGCGTGCCTAGGCGGCCACTTAAGTCTGTCTGTGAAAGCCC  
ACAGCTTAACCTGTGGAGGTCGATGGAACCTGGGAGCTTGAACTTAGGAGAGGTAAAGTGAATCCATGTGTAGCGGTG  
AAATGCTTAGATATATGGAGGAACACCAGTGGCGAAGGCGGCTTACTGGTCTAGAATTGACGCTGATGCACGAAAGCGTG  
GGTAG

>ASV:1195:Species:bouchesdurhonensis  
TACGTAGGGGGCGAGCGTTATCCGGATTATTGGGCGTAAAGCGCGCTAGGCGGCCCTGGCAGGCCGGGGTCAAATGCG  
GGGGCTCAACCCCGGCTGCATTTGAACTCCGGGCTTGGGTCGGTAGGGGAGGGTGAACACCCGTTGTAGCGGTGG  
AATGCGCAGATATCGGGTGAACACCAGTGGCGAAGGCGGCCCTCTGGGCCGTGACCGACGCTGAGGCGCAAAGCTGGG  
GGAGC

>ASV:1196:Family:Ruminococcaceae  
TACGTAGGGAGCGAGCGTTGTCGGATTTACTGGGTGTAAGGGTGCCTAGGCGGCCCTGCAAGTCAGATGTGAAATACC  
GGGGCTCAACCCCGGAGCTGCATTTGAACTGATGGTCTTGGTGAAGTAGAGGCAGGCGGAATTCCTAGTGTAGCGGTG  
AAATGCTAGATATTAGGAGGAACACCAGTGGCGAAGGCGGCCCTGCTGGGCTTAACTGACGCTGAGGCACGAAAGCATG  
GGGAG

>ASV:1197:Genus:Parabacteroides  
TACGGAGGATCCGAGCGTTATCCGGATTTATTGGGTTAAAGGGTGCCTAGGCGGCCCTTTTAAAGTCAGCGGTGAAAGTCT  
GTGGCTCAACCATAGAAATTGCCGTTGAACTGGGGGCTTGGTATGTTTGAAGCAGGCGGAATGCGTGGTGTAGCGGTG  
AAATGCATAGATATCACGCAGAACCCGATTGCGAAGGCAGCCTGCTAGGGTGCACAGACGCTGAGGCACGAAAGCGTG  
GGTAT

>ASV:1198:Genus:Brucella  
TACGAAGGGGGCTAGCGTTGTCGGATTTACTGGGCGTAAAGCGCACGCTAGGCGGACTTTTAAAGTCAGGGGTGAAATCCC  
GGGGCTCAACCCCGGAACTGCCGTTGATACTGGAAGTCTTGGTATGTTGAGGAGGTAAGTGAATTCGAGTGTAGAGGTG  
AAATTCGTAGATATTCGAGGAACACCAGTGGCGAAGGCGGCTACTGGACCATTACTGACGCTGAGGTGCAAAGCGTG  
GGGAG

>ASV:1199:Genus:Parabacteroides  
TACGGAGGATCCGAGCGTTATCCGGATTTATTGGGTTAAAGGGTGCCTAGGCGGCCCTTTTAAAGTCAGCGGTGAAAGTCT  
GTGGCTCAACCATAGAAATTGCCGTTGAACTGGGGGCTTGGTATGTTTGAAGCAGGCGGAATGCGTGGTGTAGCGGTG  
AAATGCATAGATATCACGCAGAACCCGATTGCGAAGGCAGCCTGCCAAGCCATTACTGACGCTGATGCACGAAAGCGTG  
GGGAT

>ASV:1200:Family:Muribaculaceae  
TACGGAGGATCGAGCGTTATCCGGATTTATTGGGTTAAAGGGTGCCTAGGCGGCCCTTAAAGTCAGCGGTGAAATTCG  
GGGGCTCAACCCCGTGCAGCGTTGAACTGGCAGACTTGGATTGGCAGAGTACGCGGAATGCGCGGTGTAGCGGTGA  
AATGCATAGATATCGCGAGAACCCGATTGCGAAGGCAGCCTACCGGCCAGACTGACGCTGAGGCACGAAAGCGTG  
GGATC

>ASV:1201:Genus:Lachnospiraceae\_FCS020\_group  
TACGTAGGGGGCAAGCGTTATCCGGATTTACTGGGTGTAAGGGAGCGTAGACGGCTTTGCAAGTCTGACGTGAAATCC  
GGGGCTCAACCCCGGAACTGCGTTGAACTGTGAGGCTTGGTATGTTGAGGAGGTAAGCAGGAAATTCCTAGTGTAGCGGTG  
AAATGCTAGATATTAGGAGGAACACCAGTGGCGAAGGCGGCTTACTGGACGCAACTGACGTTGAGGCTCGAAAGCGTG  
GGGAG

>ASV:1202:Order:Izimaplasmatales  
TACATAGGGGGCAAGCGTTATCCGGAATTATTGGGCGTAAAGCGTGCCTAGGCGGCCACTTAAGTCTGTCTGTGAAAGCCC  
ACAGCTTAACTGTGGAGGTCGATGGAACCTGAGAGGCTTGAATCTAGGAGAGGTAAAGTGAATCCATGTGTAGCGGTG  
AAATGCTTAGATATATGGAGGAACACCAGTGGCGAAGGCGGCTTACTGGTCTAGAATTGACGCTGATGCACGAAAGCGTG  
GGTAG

>ASV:1203:Genus:Candidatus\_Soleaferrea  
TACGTAGATGGCGAGCGTTGTCGGAAATTACTGGGTGTAAGGGAGGTAGGCGGGATCATAAGTTGCGTGTGAAATGCA  
GGGGCTCAACCCCTGAACTGCGCGCAAACTGTGGTCTTGGTGAAGTAGAGGCAGGCGGAATTCGCGGTGTAGCGGTG  
GAATGCTAGATATCGGGAGGAACACCAGTGGCGAAGGCGGCTTACTGGGCTTTTACTGACGCTGAGGCTCGAAAGCATG  
GGGAG

>ASV:1204:Family:Lachnospiraceae  
TACGTAGGGGGCAAGCGTTATCCGGATTTACTGGGTGTAAGGGAGCGTAGACGGAATGGAAGTCTGATGTGAAAGGCC  
GGGGCTCAACCCCGGACTGCATTTGAACTGTCAATCTAGAGTACCGGAGGGGTAAGTGAATTCCTAGTGTAGCGGTG  
AAATGCTAGATATTAGGAGGAACACCAGTGGCGAAGGCGGCTTACTGGACGTTAAGTACGCTTGGGCTCGAAAGCGTG  
GGGAG

>ASV:1205:Genus:Ruminococcaceae\_UCG-005  
TACGTAGGTGGCAAGCGTTGTCGGATTTACTGGGTGTAAGGGCGTGCCTAGGCGGAGTTGCAAGTCAGATGTGAAATCTC  
TGGGCTCAACCCAGAACTGCATTTGAACTGTAGCCCTTGGTATCGGAGAGGCAAGCGGAATTCCTAGTGTAGCGGTG  
AAATGCTAGATATTAGGAGGAACACCAGTGGCGAAGGCGGCTTACTGGACGCAACTGACGCTGAGGCGCAAAGCGTG  
GGGAG

>ASV:1206:Genus:Bacteroides  
TACGGAGGATGCGAGAGTTATCCGGATTTATTGGGTTAAAGGGAGCGCAGACGGGTCGTTAAGTCAGCTGTGAAAGTTT  
GGGGCTCAACCTTAAATTCAGTTGATACTGGGCTCTTGGTGTGAGTGTGCGGAATTCGTTGGTGTAGCGGTG

AAATGCTTAGATATCACGAAGAACTCCGATTGCGAAGGCAGCACACTAATCCGTAACGTGACGTTTCATGCTCGAAAGTGTG  
GGTAT  
>ASV:1207:Genus:Parabacteroides  
TACGGAGGATCCGAGCGTTATCCGGATTTATTGGGTTTAAAGGGTGCCTAGGCGGCCTTTAAGTCAGCGGTGAAAGTCT  
GTGGCTCAACCATAGAATTGCCGTTGAAACTGGGGGCTTGGAGTATGTTTGAGGCAGCGGAATGCGTGGTGTAGCGGTG  
AAATGCTTAGATATCACGAAGAACTCCGATTGCGAAGGCAGCTTACTAACCTGTAACGTGACATTGATGCTCGAAAGTGTG  
GGTAT  
>ASV:1208:Genus:Blautia  
TACGTAAGGGGCAAGCGTTATCCGGATTTACTGGGTGTAAGGGAGCGTAGACGGAGAGGCAAGTCTGATGTGAAAGGCA  
TGGGCTCAACCTGTGGACTGCATTGAAACTGTTTTCTAGAGTGCCGGAGAGGCAGCGGAATTCCTAGTGTAGCGGTG  
AAATGCGTAGATATTAGGAGGAACACCAGTGCGAAGGCAGCGCTGCTGGACGTAACGTGACGTTGAGGCTCGAAAGCGTG  
GGAG  
>ASV:1209:Genus:Marvinbryantia  
TACGTAGGGGGCAAGCGTTATCCGGATTTACTGGGTGTAAGGGAGCGTAGACGGCTTTCAGTCTGATGTGAAAGGCG  
GGGGCTCAACCCCTGGACTGCATTGAAACTGTTTCTAGAGTGCCGGAGAGGTAAGCGGAATTCCTAGTGTAGCGGTG  
AAATGCGTAGATATTAGGAGGAACACCAGTGCGAAGGCAGCGCTTACTGGACGTAACGTGACGTTGAGGCTCGAAAGCGTG  
GGAG  
>ASV:1210:Genus:Ruminococcaceae\_NK4A214\_group  
TACGTAGGTGGCAGCGTTGTCCGGATTTACTGGGTGTAAGGGCGCGCAGGCGGGAGAGCAAGTCAAGTGTGAAATCTA  
TGGGCTTAACCATAAACTGCATTTGAAACTGTTTTCTTGGAGTGATGGAGAGGCAAGCGGAATTCCTAGTGTAGCGGTG  
AAATGCGTAGATATTAGGAGGAACACCAGTGCGAAGGCAGCGCTTACTGGACATTAACGTGACGTTGAGGCGCGAAAGCGTG  
GGAG  
>ASV:1211:Family:Lachnospiraceae  
TACGTAGGGGGCAAGCGTTATCCGGATTTACTGGGTGTAAGGGAGCGTAGACGGAGAGGCAAGTCTGATGTGAAAACCC  
GGGGCTCAACCCCGGACTGCATTGAAACTGTTTTCTAGAGTGTCGGAGAGGTAAGCGGAATTCCTAGTGTAGCGGTG  
AAATGCGTAGATATTAGGAGGAACACCAGTGCGAAGGCAGCGCTTACTGGACGATGACTGACGTTGAGGCTCGAAAGCGTG  
GGAG  
>ASV:1212:Genus:Butyricimonas  
TACGGGGGATGCGAGCGTTATCCGGATTTATTGGGTTTAAAGGGCGCGTAGGCGGGACGTCAGTCAAGTCAAGCGTAAAAGACT  
GCAGCTAAACTGTAGCACCGCTTAAACTGTGACCTGGAGACGAGACGAGGGAGGCGGAACAAGTGAAGTAGCGGTGA  
AATGCATAGATACCTTGGAAACCCGATAGCGAAGGCAGCTTCCAGGCTCGATCTGACGCTGATGCGGAGAGCGGTG  
GTAGC  
>ASV:1213:Genus:Porphyromonas  
TACGGAGGATGCGAGCGTTATCCGGAATTATTGGGTTTAAAGGGTGCCTAGGTTGCAAGGGAAGTCAAGGGTAAAAGCT  
GTAGCCCAACTATGGTCTTGCCTTTGAAACTCTCTAGCTAGAGTGTACTGGAGGTACGTGGAACGTGTGGTGTAGCGGTG  
AAATGCGTAGATATCACACAGAAGTCCGATTGCGCAGGCAGCGTACTACATTACAACGTGACTGAAGCACGAAAGCGTG  
GGTAT  
>ASV:1214:Genus:Acidaminococcus  
TACGTAGGTGGCAAGCGTTGTCCGGAATTATTGGGCGTAAAGAGCATGTAGGCGGGCTTTAAGTCTGACGTGAAAATGC  
GGGGCTTAACCCGATAGCGTTGGATACTGGAAGTCTTGGTGCAGGAGAGGAAAGGGGAATTCAGTGTAGCGGTGA  
AATGCGTAGATATTGGGAGGAACACCAGTGCGAAGGCAGCGCTTCTGGACTGTGTCTGACGCTGAGATGCGAAAGCCAGG  
GTAGC  
>ASV:1215:Genus:UBA1819  
AACGTAGGGTGAAGCGTTGTCCGGAATTACTGGGTGTAAGGGAGCGCAGGCGGATTGTCAAGTTGGGAGTAAAATCTA  
TGGGCTCAACCCATAAATTGCTTTCAAACCTGTCACTTGGTGTAGAGGTAGGCGGAATTCAGGTTGTAGCGGTG  
GAATGCGTAGATATCGGAGGAACACCAGTGCGAAGGCAGCGCTTACTGGGACTAATGACGCTGAGGCTCGAAAGCATG  
GGTAG  
>ASV:1216:Genus:Bilophila  
TACGGAGGGTGAAGCGTTAATCCGGAATCACTGGGCGTAAAGCGCACGTAGGCGGCCGGTAAGTCAAGGTTAGATGTGAAAGGCC  
ACAGCCCAACTGTGGAAGTGCCTTGAATACTGCCGGCTTGGTACCAGGAGAGGGTGGCGGAATTCAGGTTGTAGGAGTG  
AAATCCGTAGATATCTGGAGGAACACCAGTGCGAAGGCAGCGCTGACGCTGAGGTTGCGAAAGCGTG  
GGTAG  
>ASV:1217:Genus:Flavonifractor  
TACGTAGGTGGCAAGCGTTATCCGGATTTATTGGGTGTAAGGGCGTGTAGGCGGGACTGCAAGTCAAGTGTGAAAACCA  
CGGGCTCAACCTGTGGCCTGCATTTGAAACTGTAGTCTTGGTGTAGGAGGCAATCGGAATTCAGTGTGTAGCGGTG  
AAATGCGTAGATATACGGAGGAACACCAGTGCGAAGGCAGCGATTGCTGGACGATAACGTGACGCTGAGGCGCGAAAGCGTG  
GGAG  
>ASV:1218:Family:Lachnospiraceae  
TACGTATGGAGCAAGCGTTATCCGGATTTACTGGGTGTAAGGGTGCCTAGGTTGGCAGTGAAGTTAGATGTGAAAGGCC  
GGGGCTCAACCCCGAGCTGCATTTGAAACTGCTCGGCTAGAGTACAGGAGAGGCAGGCGGAATTCCTAGTGTAGCGGTG  
AAATGCGTAGATATTAGGAGGAACACCAGTGCGAAGGCAGCGCTGCTGGACTGTTACTGACACTGAGGCACGAAAGCGTG  
GGAG  
>ASV:1219:Genus:Oscillibacter  
TACGTAGGTGGCAAGCGTTGTCCGGATTTACTGGGTGTAAGGGCGTGCAGCCGGGCGGCAAGTCAAGTGTGAAATCCA  
CGAGCTTAACTCGTGAAGTGCATTTGAAACTGTTGGTCTTGGTATCGGAGAGGTAATCGGAATTCCTGTGTAGCGGTG  
AAATGCGTAGATATAAGGAAGAACACCAGTGCGAAGGCAGCGATTACTGGACGACAACGTGACGTTGAGGCGCGAAAGCGTG  
GGAG  
>ASV:1220:Genus:Ruminiclostridium\_9

TACGTAGGGAGCAAGCGTTATCCGGATTTACTGGGTGTAAAGGGCGTGTAGGCGGGACTGCAAGTCAGATGTGAAAACCTC  
GGGGCTCAACCCGAGCCTGCATTTGAAACTGTAGTTCTTGAGTGGTGGAGAGGCAAATGGAATTCCTAGTGTAGCGGTG  
AAATGCGTAGATATTAGGAAGAACCACAGTGGCGAAGGCGATTGCTGGACACTAACTGACGCTGAGGCGCAAAGCGTG  
GGGAG

>ASV:1221:Genus:Lachnospiraceae\_UCG-001

TACGTATGGTGAAGCGTTATCCGGATTTACTGGGTGTAAAGGGAGCGCAGGCGGTTTGGAAGTCTGATGTGAAAATCC  
GGGGCTCAACCCGGAAGTGCATTGAAACTGTGAGACTAGAGTGTGCGGAGAGGTAAGTGAATTCCTAGTGTAGCGGTG  
AAATGCGTAGATATTAGGAGGAACACCAGTGGCGAAGGCGGCTTACTGGACGATAACTGACGCTGAGGCTCGAAAGCGTG  
GGGAG

>ASV:1222:Family:Ruminococcaceae

TACGTAGGGAGCAAGCGTTGTCCGGATTTACTGGGTGTAAAGGGTGCCTAGGCGGGAACGCAAGTCAAGCGGTGAAATACC  
GGGGCTCAACTCCGGGGCTGCGCTTAAACTGTGTTTCTTGAGTGAAGTAGAGGCGAGCGGAATTCCTAGTGTAGCGGTG  
GAATGCGTAGATATTAGGAGGAACACCAGTGGCGAAGGCGGCTGCTGGGCTTAACTGACGCTGATGCACGAAAGCATG  
GGGAG

>ASV:1223:Genus:Faecalibacterium

AACGTAGGTCAAGCGTTGTCCGGAACTTACTGGGTGTAAAGGGAGCGCAGGCGGGAAGACAAGTTGGAAGTAAATCTA  
TGGGCTCAACCATAAACTGCTTTCAAACCTGTTTTCTTGAGTAGTGCAGAGGTAGGCGGAATTCCTAGTGTAGCGGTG  
GAATGCGTAGATATCGGAGGAACACCAGTGGCGAAGGCGGCTTACTGGGCACTAACTGACGCTGAGGCTCGAAAGTGTG  
GGTAG

>ASV:1224:Family:Muribaculaceae

TACGGAGGATGCGAGCGTTATCCGGATTTATTGGGTTAAAGGGTGCAGGCGGACTTTCAAGTCAAGCGGTCAAATCGC  
GGGGCTCAACCCGTTCCGCGCTTAAACTGGGAGCCTTGAAGTGCAGGAGGTAAGCGGAATGCGTGGTGTAGCGGTGA  
AATGCATAGATATCACGCAGAACTCCGATTGCGAAGGCGAGCTACCGGCGCGCAACTGACGCTCATGCACGAAAGCGTG  
GTATC

>ASV:1225:Genus:Blautia

TACGTAGGGGGCAAGCGTTATCCGGATTTACTGGGTGTAAAGGGAGCGCAGACGGTGTGGAAGTCTGATGTGAAAGGCA  
TGGGCTCAACCTGTGGACTGCATTGAAACTGTGATACTTGAAGTGCAGGAGGGTAAGCGGAATTCCTAGTGTAGCGGTG  
AAATGCGTAGATATTAGGAGGAACACCAGTGGCGAAGGCGGCTTACTGGACGTAACCTGACGTTGAGGCTCGAAAGCGTG  
GGGAG

>ASV:1226:Family:Muribaculaceae

TACGGAGGATGCGAGCGTTATCCGGATTTATTGGGTTAAAGGGTGCAGGCGGACCGGAAAGTCAAGCGGTAAAATCGA  
GGAGCTCAACTCCTCCAGCGCTTAAACTGTGCTTGAAGTGGGCGGAGGTAAGCGGAATGCGTGGTGTAGCGGTGA  
AATGCATAGATATCACGCAGAACTCCGATTGCGAAGGCGAGCTACCGGCGCGCAACTGACGCTCAGGCGCAAAGCGTG  
GTATC

>ASV:1227:Genus:Parasutterella

TACGTAGGGTGCAGCGTTAATCCGAACTTACTGGGCGTAAAGGGTGTGAGGCGGCTGAGTAAGACAGATGTGAAATCCC  
CGGGCTTAACCTGGGAACCGCATATGTGACTGCTTGGCTAGAGTGGGCGGAGGTAAGCGGAATTCCTAGTGTAGCGGTG  
AAATGCGTAGATATGTGGAAGAACCAGTGGCGAAGGCAACCTCTGGGACGCAACTGACGCTCATACGAAAGCGTG  
GGGAG

>ASV:1228:Family:Lachnospiraceae

TACGTATGGTGAAGCGTTATCCGGATTTACTGGGTGTAAAGGGAGCGTAGACGGAGTGGCAAGTCTGATGTGAAAACCC  
GGGGCTCAACCTCGGACTGCATTGGAACTGTCAATCTAGAGTACCAGGAGGTAAGCGGAATTCCTAGTGTAGCGGTG  
AAATGCGTAGATATTAGGAGGAACACCAGTGGCGAAGGCGGCTTACTGGACGTAACCTGACGTTGAGGCTCGAAAGCGTG  
GGGAG

>ASV:1229:Species:casei/helveticus/paracasei/plantarum/rhamnosus/zeae

TACGTAGGTGGCAAGCGTTATCCGGATTTATTGGGCGTAAAGCGAGCGCAGGCGGTTTTTAAAGTCTGATGTGAAAGCCC  
TCGGCTTAACCTGGGAACCGCATATGGAACTGGGAACTTGAAGTGCAGGAGGTAAGCGGAATTCCTAGTGTAGCGGTG  
AAATGCGTAGATATATGGAAGAACCAGTGGCGAAGGCGGCTGCTGGTCTGTAACCTGACGCTGAGGCTCGAAAGCATG  
GGTAG

>ASV:1230:Genus:Family\_XIII\_AD3011\_group

TACGTAGGGGGCAAGCGTTATCCGGAATTTATGGGCGTAAAGAGTACGTAGGTGGTTACCTAAGCACGAGGTATAAGGCA  
ATGGCTTAACCATTTGTCGCTTGTGAACCTGGGCTACTTGAAGTGCAGGAGAGGAAAGCGGAATTCCTAGTGTAGCGGTG  
AATGCGTAGATATTAGGAGGAACACCAGTGGCGAAGGCGGCTTCTGGACTGTAACCTGACACTGAGGTACGAAAGCGTGG  
GGAGC

>ASV:1231:Family:Coriobacteriales\_Incertae\_Sedis

TACGTATGGTGAAGCGTTATCCGGAATCATTGGGCGTAAAGCGCGCTAGGCGGCTTGTAAAGCAGGAATTTAAATCTT  
AGGGCTCAACCTTAAGTCGGTTCTGAACTGGCAGGCTCAGTGCAGGTAAGGAGGAAAGCGGAATTCCTAGTGTAGCGGTG  
AATGCGCAGATATTGGGAAGAACCAGTGGCGAAGGCGGCTTCTGGGCGGCACTGACGCTGAGGCGCAAAGCTAGG  
GGAGC

>ASV:1232:Species:acetispora

TACGTAGGTGGCAAGCGTTGTCCGGAATTTACTGGGTGTAAAGGGAGCGTAGGCGGGAATGCAAGTTGAATGTTAAACTA  
TCGGCTCAACTGATAATCGCGTTCAAACCTGCATTTCTTGAGTGGAGTAGAGGCAAGGCGGAATTCCTAGTGTAGCGGTG  
AATGCGTAGATATTAGGAGGAACACCAGTGGCGAAGGCGGCTGCTGGGCTTAACTGACGCTGAGGCTCGAAAGCGTGG  
GTAGC

>ASV:1233:Genus:Ruminiclostridium\_5

TACGTAGGGAGCAAGCGTTGTCCGGATTTACTGGGTGTAAAGGGTGCCTAGGCGGCAAGGCAAGTCAAGCGGTGAAATCTG  
TGGGCTTAACCCACAACTGCGCTTAAACTGTCTTCTTGAGTGAAGTAGAGGTAGGCGGAATTCCTAGTGTAGCGGTG  
AAATGCGTAGAGATCGGAGGAACACCAGTGGCGAAGGCGGCTTACTGGGCTTAACTGACGCTGAAGCACGAAAGCATG

GGTAG

>ASV:1234:Genus:Intestinimonas

TACGTAGGTGGCAAGCGTTATCCGGATTTACTGGGTGTAAGGGCGGTAGGCGGGAGTGCAAGTCAGATGTGAAAATTA  
TGGGCTCAACCATAACCTGCATTTGAACTATATGCTTGAGTACTGGAGAGGCAGCGGAATTCCTGTGTAGCGGTG  
AAATGCGTAGATATACGGAGAACACCCAGTGGCGAAGGCGGCTGCTGGACAGCAACTGACGCTGAGGCGCAAAGCGTG  
GGGAG

>ASV:1235:Genus:Ruminococcaceae\_UCG-003

TACGTAGGTGGCAAGCGTTATCCGGATTTACTGGGTGTAAGGGCGGTGACGCCGGCATGCAAGTCAGATGTGAAATCTC  
AGGGCTTAACCCTGAACTGCATTTGAACTATATGCTTGAGTGCCGGAGAGGTAATCGGAATTCCTGTGTAGCGGTG  
AAATGCGTAGATATAAGGAAGAACACCCAGTGGCGAAGGCGGATTACTGGACGGTAACGACGCTGAGGCGCAAAGCGTG  
GGGAG

>ASV:1236:Family:Muribaculaceae

TACGGAGGATGCGAGCGTTATCCGGATTTATTGGGTTAAAGGGTGCAGGCGGATCGGAAAGTCAGCGGTAAAATCGA  
GGAGCTCAACTCCTCCAGCCGTTGAACTGTGCGTCTAGAGTGGGCGAGAAGTATGCGGAATGCGTGGTGTAGCGGTGA  
AATGCATAGATATCACGCGAACTCCGATTGCGAAGGCGCATACCGGCGCCAACGACGCTCAGGCACGAAAGCGTGG  
GTATC

>ASV:1237:Species:periodonticum

TACGTATGTCACAAGCGTTATCCGGATTTATTGGGCTAAAGCGCGTCTAGGTGGTTATGTAAGTCTGATGTGAAAATCG  
AGGGCTCAACTCTGTATTGCGTTGAACTGCATGACTAGAGTACTGGAGAGGTAAGCGGAACATAAGTGTAGAGGTGA  
AATTCGTAGATATTTGTAGGAATGCCGATGGGAAGGCGACTTACTGGACAGATACTGACGCTAAAGCGCAAAGCGTGG  
GTAGC

>ASV:1238:Species:aidingensis/alimentaria/cerina/daqiaonensis/desiderata/fontilapidosi/lutea/  
nitroreducens/rifensis/salina/stenophila/ventosae

TACGGAGGGTGCAGCGTTAATCGGAATTACTGGGCGTAAAGCGCGGTAGGCGGCGTGATAAGCCGGTTGTGAAAGCCC  
CGGGCTCAACTCGGAAACGGCATCCGGAAGTGTGAGGCTAGAGTGCAGGAGAGGAAGTAGAATTCCTGGTGTAGCGGTG  
AAATGCGTAGAGATCGGGAGGAATACCCAGTGGCGAAGGCGGCTTCTGGACTGACACTGACGCTGAGGTGCGAAAGCGTG  
GGTAG

>ASV:1239:Genus:Lachnospiraceae\_UCG-004

TACGTAGGGGGCAAGCGTTATCCGGATTTACTGGGTGTAAGGGAGCGTAGACGGTGACGCAAGTCTGAAGTGAATACC  
CGGGCTCAACTCGGAACTGCCTTTGAACTGTGTTGCTAGAGTGTGGAGAGGTAAGCGGAATTCCTAGTGTAGCGGTG  
AAATGCGTAGATATTAGGAAGAACACCCAGTGGCGAAGGCGGCTTACTGGACAGTAACGACGTTGAGGCTCGAAAGCGTG  
GGGAG

>ASV:1240:Genus:Peptococcus

TACGTAGGGGGCAAGCGTTGTCCGGAATCACTGGGCGTAAAGGGCGCGTAGGCGGCAATATAAGTCAGATGTGAAAGGTG  
AGGGCTCAACCCTTAGACTGCATCTGATACTGTATAGCTTGTAGTGTGAGAGAGGAAAGCGGAATTCCTAGTGTAGCGGTG  
AAATGCGTAGATATTAGGAGGAACACCCAGTGGCGAAGGCGGCTTCTGGCTCATAACTGACGCTGAGGCGCAAAGCGTG  
GGGAG

>ASV:1241:Genus:Hoeflea

TACGAAGGGGGCTAGCGTTGTCCGGAATTACTGGGCGTAAAGCGCACGTAGGCGGATCGTTAAGTGAGGGGTGAAATCCC  
AGGGCTCAACCCTGGAAGTGCCTCTCATACTGGCGATCTCGAGTTCGAGAGAGGTGAGTGGAAATTCAGTGTAGAGGTG  
AAATTCGTAGATATTGAGGAGGAACACCCAGTGGCGAAGGCGGCTACTGGCTCGACACTGACGCTGAGGTGCGAAAGCGTG  
GGGAG

>ASV:1242:Genus:Christensenellaceae\_R-7\_group

TACGTAGGGGGCAAGCGTTGTCCGGAATTATTGGGCGTAAAGGGTGCAGGCGGCTTACAAGTTGGATGTGAAATCCC  
CGTGCTTAACATGGGAACTGCATCCAAAAGTGTAGGGCTTGTAGTGTGGAAGAGGTAAGTGGAAATTCAGTGTAGCGGTG  
AAATGCGTAGATATTGGGAGGAACACCCAGTGGCGAAGGCGACTTACTGGGCCAACGACGCTGAGGCGCAAAGCGTG  
GGGAG

>ASV:1243:Species:odontolyticus

TACGTAGGGCGCGAGCGTTGTCCGGAATTATTGGGCGTAAAGGGCTTGTAGGCGGTTGGTCCGCTGCTGCCGTGAAATCT  
CTGGCTTAACCTGGGGCGTGCAGTGGGTACGGGCTGACTTGTAGTGCAGTGGGGAGACTGGAACCTCGGTGTAGCGGTG  
GAATGCGCAGATATCAGGAAGAACACCCGTTGGCGAAGGCGGCTCTGGGCCGTTACTGACGCTGAGGAGCGAAAGCGTG  
GGGAG

>ASV:1244:Family:Lachnospiraceae

TACGTATGGTGCAGCGTTATCCGGATTTACTGGGTGTAAGGGAGCGTAGACGGAGTGGAAGTCTGATGTGAAAACCC  
GGGGCTCAACCCTGGGACTGCATTTGAACTGTCAATCTAGAGTACCGGAGAGGTAAGCGGAATTCCTAGTGTAGCGGTG  
AAATGCGTAGATATTAGGAGGAACACCCAGTGGCGAAGGCGGCTTACTGGACGGTAACGACGTTGAGGCTCGAAAGCGTG  
GGGAG

>ASV:1245:Genus:Lachnospiraceae\_NC2004\_group

TACGTAGGGTCCGAGCGTTATCCGGATTTACTGGGTGTAAGGGCGAGTAGACGGAACTGCAAGTCTGATGTGAAATGCT  
AGAGCTCAACTTTAGAACTGCATCTGAACTGTGAACTAGAGTGCAGGAGAGGTAAGCGGAATTCCTAGTGTAGCGGTG  
AAATGCGTAGATATTAGGAGGAACACCCAGTGGCGAAGGCGGCTTACTGGACTGTAACGACGTTGAGGCGCAAAGTGTG  
GGGAG

>ASV:1246:Family:Ruminococcaceae

TACGTAGGTGGCGAGCGTTATCCGGAATTATTGGGTGTAAGGGTGCAGGCGGATGTAAGTCTGATGTGAAATGCC  
GCGGCTCAACCCTGGGAGCTGCATTTGAACTATGTTCTTGAGTGAAGTAGAGGTAAGCGGAATTCCTAGTGTAGCGGTG  
AAATGCGTAGATATTAGGAGGAACACCCGTTGGCGAAGGCGGCTTACTGGGCTTAGACTGACGCTGAGGCGCAAAGTGTG  
GGGAG

>ASV:1247:Genus:Ruminiclostridium\_1

TACGTAGGTGGCAAGCGTTGTCCGGATTTACTGGGTGTAAAGGGCGCGTAGGCGGGT CAGCAAGTCAGATGTGAAATACC  
GGGGCTCAACTCCGGAAGTGAACACTGAACTGTTGATCTTGAGTACTGGAGAGGAAAGTGAATTCCTAGTGTAGCGGTG  
AATGCGTAGAGATTAGGAGGAACACCACTGGCGAAGGCGGCTTTCTGGACAGTAACGACGCTGATGCGCGAAAGCGTG  
GGGAG

>ASV:1248:Genus:Succiniclasticum

TACGTAGGTGGCAAGCGTTGTCCGGAATTTATTGGGCGTAAAGGCGCATGTAGGCGGTTTGGTAAGTCCGTCTGAAAATGC  
GGTGCTTAACGCCGATGGCGATCGAAACTGCCGAACCTTGAGTGCAGGAGAGAAAGGGGAACTCCCAGTGTAGCGGTGA  
AATGCGTAGATATTGGGAAGAACACCGGTGGCGAAGGCGCCTTTCTGGACTGTGTCTGACGCTCAGATGCGAAAAGCCAG  
GTAGC

>ASV:1249:Genus:Prevotella\_9

TACGGAAGGTCCGGGCTTATCCGGATTTATTGGGTTTAAAGGGAGCGTAGGCCGGAGATTAAGCGTGTGTGAAATGTA  
GATGCTCAACATCTGAACTGCAGCGCAACTGGTTTCTTGGAGTACGCACAAAGTGGGCGGAATTCGTGGTGTAGCGGTG  
AAATGTTTAGATATCACGAAGAACTCCGATTGCGAAGGCGAGTCACTGGAGCGCAACTGACGCTGAAGCTCGAAAGTGGC  
GGTAT

>ASV:1250:Order:Mollicutes\_RF39

TACGTAGGGAGCAAGCGTTATCCGGATTTATTGGGCGTAAAGGGTGCCTAGGCGGTTTGTAAAGTATGAGATTAAGCCT  
GGGGCTTAACCTCAGTTCGTTTCATAAACTGGCAGACTTGAGTATGGCAGAGGTAACCGGAATTCCTAGTGTAGCGGTGA  
AATGCGTAGATATTAGAAGGAACACCACTGGCGAAGGCGGCTTACTGGGCCATAACTGACGCTGAGGCACGAAAGCGTGG  
GGAGC

>ASV:1251:Genus:Ruminiclostridium\_5

TACGTAGGGAGCAAGCGTTGTCCGGATTTACTGGGTGTAAAGGGTGCCTAGGCGGCTCGGCAAGTCAGAGGTGAAATCCA  
TGGGCTTAACCCATGAACTGCCTTTGAAACTGCCGAACCTTGAGTGAAGTAGAGGTAGGCGGAATTCCTGGTGTAGCGGTG  
AAATGCGTAGAGATCCGGAGGAACACCACTGGCGAAGGCGGCTTACTGGGCTTAACTGACGCTGAGGCACGAAAGCATG  
GGTAG

>ASV:1252:Genus:Ruminococcaceae\_UCG-005

TACGTAGGGAGCAAGCGTTGTCCGGATTTACTGGGTGTAAAGGGCGTGTAGGCGGAGATGCAAGTCAGATGTGAAATCTG  
GGGGCTCAACCCCAAAGTGCATTTGAAACTGTATCCCTTGGAGTATCGGAGAGGCAGGCGGAATTCCTAGTGTAGCGGTG  
AAATGCGTAGATATTAGGAGGAACACCACTGGCGAAGGCGGCTGCTGGACGCAACTGACGCTGAGGCACGAAAGCGTG  
GGGAG

>ASV:1253:Family:Lachnospiraceae

TACGTAGGGGGCAAGCGTTATCCGGATTTACTGGGTGTAAAGGGAGCGTAGACGGAGCAGCAAGTCTGATGTGAAAGCCC  
GGGGCTCAACCCCGGACTGCATTGAAACTGTTGGACTAGAGTGTGGAGAGGTAAGTGAATTCCTAGTGTAGCGGTG  
AAATGCGTAGATATTAGGAGGAACACCACTGGCGAAGGCGGCTTACTGGACAGTAACGACGTTGAGGCTCGAAAGCGTG  
GGGAG

>ASV:1254:Genus:Prevotella\_2

TACGGAAGGTCTGGCGTTATCCGGATTTATTGGGTTTAAAGGGAGCGTAGGCGGCTCTGGTAAGCGTGTGTGAAATGTC  
GGGGCTCAACCTGGGACTGTGAGCTTTGAAACTGTCAGACTTGAGTGCCTGGGAAAGTAGGCGGAATTCGTGCTGTAGCGGTG  
AAATGCTTAGATATGACGAAGAACTCCGATTGCGAAGGCGAGCTGCTGTAGCGCAACTGACGCTGAAGCTCGAAAGCGTG  
GGTAT

>ASV:1255:Genus:Intestinibacter

TACGTAGGGGGCTAGCGTTATCCGGATTTACTGGGCGTAAAGGGTGCCTAGGCGGCTTTTTAAGTCAGGAGTGAAGGCT  
ACGGCTCAACCTGAGTAAAGCTTTGAAACTGGAGACTTGAGTGCAGGAGAGGAGAGTGAATTCCTAGTGTAGCGGTGA  
AATGCGTAGATATTAGGAGGAACACCACTAGCGAAGGCGAGCTCTCTGGACTGTAACGACGCTGAGGCACGAAAGCGTGG  
GGAGC

>ASV:1256:Genus:Blautia

TACGTAGGGGGCAAGCGTTATCCGGATTTACTGGGCGTAAAGGGAGCGTAGACGGTGTGGCAAGTCTGATGTGAAAGGCA  
TGGGCTCAACCTGTGGACTGTGAGCTTTGAAACTGTCATACTTGAGTGCAGGAGGGTAAGCGGAATTCCTAGTGTAGCGGTG  
AAATGCGTAGATATTAGGAGGAACACCACTGGCGAAGGCGGCTTACTGGACGTAACGACGTTGAGGCTCGAAAGCGTG  
GGGAG

>ASV:1257:Genus:GCA-900066225

TACGTAGGTGGCGAGCGTTGTCCGGAATTTACTGGGTGTAAAGGGAGCGTAGGCGGGAAGACAAGTTGAATGTTAAACTA  
TCGGCTTAACCGGTAGTTCGGTTCAAAACTGTTTTCTTGGAGTGAAGTAGAGGCAAGGCGGAATTCCTAGTGTAGCGGTGA  
AATGCGTAGATATTAGGAGGAACACCACTGGCGAAGGCGGCTGCTGGGCTTAACTGACGCTGAGGCTCGAAAGCGTGG  
GTAGC

>ASV:1258:Genus:Bacteroides

TACGGAGGATCCGAGCGTTATCCGGATTTATTGGGTTTAAAGGGAGCGTAGGTGGACAGTAAAGTCAGTTGTGAAAGTTT  
GCGGCTCAACCTGAAATTGAGTTGATACTGCTGTCTTGGAGTACAGTAGAGGTGGGCGGAATTCGTGGTGTAGCGGTG  
AAATGCTTAGATATCACGAAGAACTCCGATTGCGAAGGCGAGTCACTGGACTGCAACTGACACTGATGCTCGAAAGTGTG  
GGTAT

>ASV:1259:Genus:Butyricicoccus

TACGTAGGGAGCAAGCGTTATCCGGATTTACTGGGTGTAAAGGGCGCGCAGGCGGGCCGGCAAGTTGAAAGTGAATCCG  
GGGGCTTAACCCCTGAACTGCTTTCAAACCTGCTGGTCTTGGAGTGTGGAGAGGCAGGCGGAATTCCTGTTGTAGCGGTG  
AAATGCGTAGATATACGGAGGAACACCACTGGCGAAGGCGGCTGCTGGACATTAACGACGCTGAGGCACGAAAGCGTG  
GGGAG

>ASV:1260:Species:algae/baltica/oneidensis/profunda/putrefaciens/xiamenensis

TACGGAGGGTCCGAGCGTTAATCGGAATTTACTGGGCGTAAAGCGTGCAGGCGGTTTGTAAAGCGAGATGTGAAAGCCC  
TGGGCTCAACCTAGGAATAGCATTTGAAACTGGCAGACTAGAGTCTTGTAGAGGGGGTGAATTCAGGTGTAGCGGTG  
AAATGCGTAGAGATCTGGAGGAATACCGGTGGCGAAGGCGGCCCTGGACAAAGACTGACGCTCATGCACGAAAGCGTG

GGGAG

>ASV:1261:Species:clevelandensis

TACGTAGGGTGCAGCGTTGTCCGGAATTACTGGGCGTAAAGGAGCTCGTAGGCGGTTTGTACGTCGCTGTGAAATCCT  
AGGGCTTAACCTGGACGTGCAGGCGATACGGGCTGACTTGAGTACTACAGGGGAGACTGGAATTTCTGGTGTAGCGGTG  
GAATGCACAGATATCAGGAAGAACCAGTGGCGAAGGCAGTCTCTGGGTAGTAACTGACGCTGAGGAGCGAAAGCATG  
GGTAG

>ASV:1262:Genus:Christensenellaceae\_R-7\_group

TACGTAGGGGCGAGCGTTGTCCGGAATTGTTGGGCGTAAAGGGCGTGTAGGCGGCTGCTAAGTCTGGAGTAAAATCCT  
TGCTTTCAAGGTGGGAATTGCTTTGGATACTGGTGGGCTGGAGTGCAGGAGAGGAAAGCGGAATTACCGGTGTAGCGGTG  
AAATGCGTAGAGATCGGTAGGAACACCAGTGGCGAAGGCGGCTTTCTGGACTGAAACTGACGCTGAGGCGCGAAAGCGTG  
GGGAG

>ASV:1263:Species:splanchnicus

TACGGAGGATGCGAGCGTTATCCGGATTTATTGGGTTAAAGGGTGCCTAGGCGGTTTATTAAGTTAGTGGTTAAATATT  
TGAGCTAAACTCAATTTGCCATTAATACTGGTAACTGGAGTACAGACGAGGTAGGCGGAATAAGTTAAGTAGCGGTGA  
AATGCATAGATATAACTTAGAACTCCGATAGCGAAGGCAGCTTACCAGACTGTAAGTACGCTGAAGCACGAGAGCGGTG  
GTAGC

>ASV:1264:Family:Lachnospiraceae

TACGTAGGGGGCAAGCGTTATCCGGATTTACTGGGTGTAAGGGAGCGTAGACGGCGAAGCAAGTCAAGTAAAACCC  
CGGGCTTAACCTGGGGACTGCTTTTGAAGTGTGGCTAGAGTGCAGGAGAGGTAAGTGAATTCCTAGTGTAGCGGTG  
AAATGCGTAGATATTAGGAGGAACACCAGTGGCGAAGGCGGCTTACTGGACTGTAAGTACGCTTGGGCTCGAAAGCGTG  
GGGAG

>ASV:1265:Genus:Pelosinus

TACGTAGGTGGCAAGCGTTGTCCGGAATTATTGGGCGTAAAGCGCGCAGGTGGGATTAAGTCTGGTGTAAAATCCT  
GGGGCTCAACCCCGTGAAGCATTGGAACTGATATTTCTTGGAGTGCAGGAGAGGAAAGTGAATTCCTAGTGTAGCGGTG  
AAATGCGTAGATATTAGGAGGAACACCAGTGGCGAAGGCGACTTTCTGGACTGTGCTGACACTGAGGCGCGAAAGCCAG  
GGTAG

>ASV:1266:Genus:Faecalibacterium

AACGTAGGTCAAGCGTTGTCCGGAATTACTGGGTGTAAGGGAGCGCAGGCGGGAAGACAAGTTGGAAGTAAAATCCA  
TGGGCTCAACCCATGAAGTCTTTCAAAGTGTGGCTTCTTGGAGTGCAGAGGTAGGCGGAATTCCTAGTGTAGCGGTG  
GAATGCGTAGATATCGGGAGGAACACCAGTGGCGAAGGCGGCTTACTGGGCATCAACTGACGCTGAGGCTCGAAAGTGTG  
GGTAG

>ASV:1267:Genus:Ornithinibacillus

TACGTAGGGGGCAAGCGTTGTCCGGAATTATTGGGCGTAAAGCGCGCAGGCGGCTTTAAGTCTGATGTAAAAGCCC  
ACGGCTTAACCGTGGAGGCTATTGAAACTGGAGGACTTGAGTACAGAAGAGGAGTGAATTCACGCTGTAGCGGTG  
AAATGCGTAGAGATGTGGAGGAACACCAGTGGCGAAGGCGACTTCTGGTCTGTAAGTACGCTGAGGCGCGAAAGCGTG  
GGGAG

>ASV:1268:Genus:Anaerostipes

TACGTAGGGGGCAAGCGTTATCCGGAATTACTGGGTGTAAGGGTGCCTAGGTGGTATGGCAAGTCAAGTAAAACCC  
AGAGCTTAACCTGGGACTGCTTTTGAAGTGTGAGTGCAGGAGAGGTAAGCGGAATTCCTAGTGTAGCGGTG  
AAATGCGTAGATATTAGGAGGAACATCAGTGGCGAAGGCGGCTTACTGGACTGAAACTGACACTGAGGCACGAAAGCGTG  
GGGAG

>ASV:1269:Genus:Anaerofilum

AACGTAGGTGGCAAGCGTTGTCCGGAATTACTGGGTGTAAGGGAGCGCAGGCGGAGCTGTAAGTTGGGCGTCAATCTA  
CGGGCTTAACCCGATCCGCGCTCAAACTGTGGCTCTTGGAGTGCAGAGGTAGGTGGAATTCCTAGTGTAGCGGTGG  
AATGCGTAGATATCGGGAGGAACACCAGTGGCGAAGGCGGCTTACTGGGCACCAACTGACGCTGAGGCTCGAAAGTATGG  
GTAGC

>ASV:1270:Genus:Romboutsia

TACGTAGGGGGCTAGCGTTATCCGGAATTACTGGGCGTAAAGGGTGCCTAGGTGGTTTCTTAAGTCAAGGTAAAAGGCT  
ATGGCTCAACCGTAGTAAGCCTTTGAAACTGGAACTTGGAGTGCAGGAGAGGAGAGTGAATTCCTAGTGTAGCGGTGA  
AATGCGTAGATATTAGGAGGAACACCAGTGGCGAAGGCGGCTTCTGGACTGTAAGTACACTGAGGCGACGAAAGCGTG  
GGAGC

>ASV:1271:Genus:Prevotellaceae\_UCG-003

TACGGAAGATGCGAGCGTTATCCGGAATTATTGGGTTAAAGGGAGCGTAGGCGGGCTGTTAAGTCAAGCGGTCAATGTG  
AGGGCCCAACCTTGGCATGCGGTTGATACTGGCGGCTTGGATTACACAAGGAAGGTGGAATTCGTCGTGTAGCGGTGA  
AATGCTTAGATATGACGAAGAACCAGTGGCGAAGGCGGCTTCTGGGTTACTGACGCTGAGGCTCGAAAGTGGCG  
GAATC

>ASV:1272:Genus:Lachnospira

TACGTATGGAGCAAGCGTTATCCGGAATTACTGGGTGTAAGGGAGTGTAGGTGGCCAGGCAAGTCAAGTAAAAGCCC  
GGGGCTCAACCCGGGACTGCTTTTGAAGTGCAGGGCTAGAGTGCAGGAGGGCAAGTGAATTCCTAGTGTAGCGGTG  
GAATGCGTAGATATTAGGAGGAACACCAGTGGCGAAGGCGGCTTCTGGACTGTAAGTACACTGAGGCTCGAAAGCGTG  
GGGAG

>ASV:1273:Species:stercorihominis

TACGTAGGGAGCAAGCGTTGTCCGGAATTCAGTGGGCGTAAAGGAGCACGTAGGCGGTTAATTAAGTCAAGTGTAAAATTT  
TCGGCTCAACCCGAAAGTGCACCTTGAAGTGGATACTTGGAGTATCGGAGAGGTAAGCGGAATTCCTAGTGTAGCGGTG  
AAATGCGTAGAGATTAGGAAGAACCAGTGGCGAAGGCGGCTTACTGGACGATAACTGACGCTGAGGTGCGAAAGCGTG  
GGGAG

>ASV:1274:Family:Lachnospiraceae

TACGTATGGTCAAGCGTTATCCGGAATTACTGGGTGTAAGGGAGCGTAGACGGAGTGGCAAGTCTGGAGTAAAACCC

AGGGCTCAACCTGGGACTGCTTTGGAACTGTCAATCTAGAGTGTGGAGAGGTAAGTGAATTCCTAGTGTAGCGGTG  
AAATGCGTAGATATTAGGAGGAACACCAGTGGCGAAGGCGGCTTACTGGACAGTGACTGACGTTGAGGCTCGAAAGCGTG  
GGGAG

>ASV:1275:Species:atrinae/carniphila/gwangalliensis/marina  
TACGTAGGGCGCAAGCGTTGTCCGGAATTATTGGGCGTAAAGAGCTCGTAGGCGGTTTGTCCGCTCTGCTGTGAAAGCCC  
GGGGCTTAACCCCGTGTGTGAGTGGGTACGGGCAGACTAGAGTGCAGTAGGGGAGACTGGAATTCCTGTTAGCGGT  
GAAATGCGCAGATATCAGGAGGAACACCGATGGCGAAGGCGAGTCTCTGGGCTGTTACTGACGCTGAGGAGCGAAAGCAT  
GGGGA

>ASV:1276:Genus:Sellimonas  
TACGTAGGGGGCAAGCGTTATCCGGATTTACTGGGTGTAAGGGAGCGTAGACGGCATTGCAAGTCTGGAGTAAAACCC  
GGGGCTCAACCCCGGATTGCTTTGGAACTGTGGAGCTGGAGTACCGGAGAGGCAAGTGAATTCCTAGTGTAGCGGTG  
AAATGCGTAGATATTAGGAGGAACACCAGTGGCGAAGGCGGCTTGTGGACGGTAACGACGTTGAGGCTCGAAAGCGTG  
GGGAG

>ASV:1277:Species:tayi  
TACGTAGGGGGCAAGCGTTATCCGGATTTACTGGGTGTAAGGGAGCGTAGACGGCATGGCAAGCCAGATGTGAAAACCC  
AGGGCTCAACCTTGGGATTGCAATTTGGAAGTCCCGGCTGGAGTGCAGGAGAGGTAAGCGGAATTCCTAGTGTAGCGGTG  
AAATGCGTAGATATTAGGAGGAACACCAGTGGCGAAGGCGGCTTACTGGACTGTAACGACGTTGAGGCTCGAAAGCGTG  
GGGAG

>ASV:1278:Genus:Lachnoclostridium  
TACGTAAAGGGCAAGCGTTATCCGGATTTACTGGGTGTAAGGGAGCGTAGACGGCGAAGCAAGTCTGAAGTAAAACCC  
AGGGCTCAACCTTGGGACTGCTTTGGAACTGTTTTGCTAGAGTGTCCGAGAGGTAAGTGAATTCCTAGTGTAGCGGTG  
AAATGCGTAGATATTAGGAGGAACACCAGTGGCGAAGGCGGCTTACTGGACGATAACGACGTTGAGGCTCGAAAGCGTG  
GGGAG

>ASV:1279:Order:Clostridiales  
TACGTAGGGGGCGAGCGTTGTCCGGAATCACTGGGCGTAAAGGGCGCTAGGCGGCCTAGTAAGTCAGATGTGAAAAGTG  
AGGGCTCAACCCCTAGAGTGCATCTGATACTGCTAGGCTTGGAGTACAGAAAGAGGAAAGCGGAATTCCTAGTGTAGCGGTG  
AAATGCGTAGATATTAGGAGGAACACCAGTGGCGAAGGCGGCTTCTGGGCTGAAACGACGCTGAGGCGCGAAAGCGTG  
GGGAG

>ASV:1280:Genus:Bacteroides  
TACGGAGGATCCGAGCGTTATCCGGATTTATTGGGTTAAAGGGAACGTAGGTGGATTGTTAAGTCAGTTGTGAAAATTT  
GCGGCTCAACCGTAAAATTGCAAGTGAAGTGGCAGTCTTGGAGTACAGTAGAGGTGGCGGAATTCGTGGTGTAGCGGTG  
AAATGCTTAGATATCACGAAGAACTCCGATTGCGAAGGCAGCTCACTAGACTGTCACTGACACTGATGCTCGAAAGTGTG  
GGTAT

>ASV:1281:Genus:Megamonas  
TACGTAGGCGCAAGCGTTGTCCGGAATTATTGGGCGTAAAGGGAGCGCAGGCGGAAACTAAGCGGATCTTTAAAAGTG  
GGGGCTCAACCCCGTGTAGGGTCCGAACTGGTTTTCTTGGAGTGCAGGAGAGGAAAGCGGAATTCAGGTGTAGCGGTG  
AAATGCGTAGATATTGGGAAGAACACCAGTGGCGAAGGCGGCTTCTGGACTGTAACGACGCTGAGGCTCGAAAGCTAGG  
GTAGC

>ASV:1282:Species:desulfuricans/multispirans  
TACGGAGGGTCAAGCGTTAATCCGGAATTACTGGGCGTAAAGCGCACGTAGGCTGTAGTGTAAAGTCAGGGGTGAAATCCC  
ACGGCTCAACCGTGAAGTGCCTTTGATACTGCACAACCTGAATCCGGGAGAGGGTGGCGGAATTCAGGTGTAGGAGTG  
AAATCCGTAGATATCTGGAGGAACATCAGTGGCGAAGGCGGCACCTGGACCGGATTGACGCTGAGGTGCGAAAGCGTG  
GGGAG

>ASV:1283:Genus:Lachnospira  
TACGTATGGAGCAAGCGTTATCCGGATTTACTGGGTGTAAGGGAGTGTAGGTGGCATCACAAAGTCAGAAGTAAAAGCCC  
GGGGCTCAACCCCGGACTGCTTTTGAAGTGTGGAGCTGGAGTGCAGGAGAGGTAAGTGAATTCCTAGTGTAGCGGTG  
AAATGCGTAGATATTAGGAGGAACACCAGTGGCGAAGGCGGCTTGTGGACTGTAACGACACTGAGGCTCGAAAGCGTG  
GGGAG

>ASV:1284:Genus:Bacteroides  
TACGGAGGATCCGAGCGTTATCCGGATTTATTGGGTTAAAGGGAGCGTAGGCGGAGGCTTAAGTCAGTTGTGAAAATTT  
GCGGCTCAACCGTAAAATTGCAAGTGTAGTGGTTTTCTTGGAGTGCAGTAGAGGTAGGCGGAATTCGTGGTGTAGCGGTG  
AAATGCTTAGATATCACGAAGAACTCCGATTGCGAAGGCAGCTTACTGGACTGTAACGACGCTGATGCTCGAAAGTGTG  
GGTAT

>ASV:1285:Genus:Faecalibacterium  
AACGTAGGTCACAAGCGTTGTCCGGAATTACTGGGTGTAAGGGAGCGCAGGTGGGAAGACAAGTTGGAAGTAAAATCTA  
TGGGCTCAACCCATAAACTGCTTTCAAAGTGTGGAGCTGGAGTGCAGAGGTAGGCGGAATTCCTGGTGTAGCGGTG  
GAATGCGTAGATATCTGGGAGGAACACCAGTGGCGAAGGCGGCTTACTGGGCCAACACTGACGCTGAGGCTCGAAAGTGTG  
GGTAG

>ASV:1286:Genus:Butyricimonas  
TACGGGGGATGCGAGCGTTATCCGGATTTATTGGGTTAAAGGGCGCGTAGGCGGACGCCAAGTCAGCGGTAAAAGACT  
GCAGCTAAACTGTAGCACCGGTTGAAACTGGCCCTCGAGACGAGAGGAGGCGGAACAAGTGAAGTGTAGCGGTG  
AATGCTTAGATATCACTTGAACCCCGATAGCGAAGGCAGCTTCCAGGCTCGGCTGACGCTGATGCGCGAGAGCGTGG  
GTAGC

>ASV:1287:Family:Clostridiales\_vadinBB60\_group  
TACGTAGGGGGCAAGCGTTGTCCGGAATGACTGGGCGTAAAGGGTGTGTAGGCGGTTAGGTAAGTTAGATGTGTAATACC  
CAGGGCTTAACTCCGGTGTCTGCATCTAAAAGTGCCTGACTTGAAGTGTGGAGAGGATAGTGAATTCCTAGTGTAGCGGT  
GGAATGCGTAGATATTAGGAGGAACATCAGTGGCGAAGGCGACTATCTGGACAGTAACGACGCTGAGGCGCGAAAGCGTG  
GGGGA

>ASV:1288:Genus:Lachnospirillum  
TACGTAGGGGGCAAGCGTTATCCGGATTTACTGGGTGTAAGGGAGCGTAGACGGTAAAGCAAGTCTGAAGTGAAAGCCC  
GGGGCTCAACCCGGGACTGCTTTGAAACTGTTTAGCTAGAGTGTGGAGAGGTAAAGCGAATTCTAGTGTAGCGGTG  
AAATGCGTAGATATTAGGAGGAACACCAAGTGGCGAAGGCGGCTTACTGGACAGTAACGACGTTGAGGCTCGAAAGCGTG  
GGGAG

>ASV:1289:Family:Rhodobacteraceae  
TACGGAGGGGCTAGCGTTGTTCCGAAATTTACTGGGCGTAAAGCGCACGTAGGCGGACTGGAAAGTTGGAGGTGAAATCCC  
AGGGCTCAACCTTGAAGTGCATCTGATACTGGCAGCTTGGAGTTCGAGAGAGGTGAGTGGAAATTCGAGTGTAGAGGTG  
AAATTCGTAGATATTGCGAGGAACACCAAGTGGCGAAGGCGGCTCACTGGCTCGATACTGACGCTGAGGTGCGAAAGTGTG  
GGGAG

>ASV:1290:Species:massiliensis/sartorii  
TACGGAGGATCCGAGCGTTATCCGGATTTATGGGTTTAAAGGGAGCGTAGATGGGTTGTTAAGTCAGTTGTGAAAGTTT  
GCGGCTCAACCTGAAATTCGAAATTTGATACTGGCAGCTTGGAGTACAGTTGAGGTAGGCGGAATTCGTGGTGTAGCGGTG  
AAATGCTTAGATATCACGAAGAATCCGATTGCGAAGGCGACTTACTAACTGCCACTGACATTGATGCTCGAAAGTGTG  
GGTAT

>ASV:1291:Genus:Peptococcus  
AACATAGGGGGCAAGCGTTGTCGGGAATCACTGGGCGTAAAGGGCGCGTAGGCGGTCTGTTAAGTCGGATGTGAAATGTA  
AGGGCTCAACCTTGAAGTGCATCTGATACTGGCAGCTTGGAGTTCGAGAGAGGTGAGTGGAAATTCATGTTAGCGGTG  
AAATGCGTAGATATTAGGAGGAACACCAAGTGGCGAAGGCGACTTCTGGGCGTAACTGACGCTGAGGCGGAAAGCGTG  
GGGAG

>ASV:1292:Species:aureus  
TACGTAGGTGGCAAGCGTTATCCGGAATTTATGGGCGTAAAGCGCGCGTAGGCGGTTTTTTAAGTCTGATGTGAAAGCTC  
ACGGCTCAACCTGGAGGGTCAATGGAAACTGAAACTTGGAGTGCAGAAAGAGGAAAGTGGAAATTCATGTTAGCGGTG  
AAATGCGCAGAGATATGAGGGAACACCAAGTGGCGAAGGCGACTTCTGGTCTGTAACGACGCTGATGTGCGAAAGCGTG  
GGGAT

>ASV:1293:Species:gossypii/guangxiensis/paradoxus  
TACGTAGGGTGAAGCGTTAATCCGGAATTTACTGGGCGTAAAGCGTGCAGGCGGTGATGTAAGACAGTTGTGAAATCCC  
CGGGCTCAACCTGGGAACTGCATCTGTGACTGCATCGCTGGAGTACGGCAGAGGGGGATGGAATTCGCGTGTAGCAGTG  
AAATGCGTAGATATGCGGAGGAACACCAAGTGGCGAAGGCAATCCCCTGGGCTGTACTGACGCTCATGCACGAAAGCGTG  
GGGAG

>ASV:1294:Species:bullata/halotolerans  
TACGAAAGGGGCTAGCGTTGTCGGAAATTTACTGGGCGTAAAGGGCGCGTAGGCGGACATTTAAGTCAGGGGTGAAATCCC  
AGAGCTCAACTCTGGAAGTGCATTTGATACTGGGTGCTTGGAGTGTGAGAGAGGTATGTGGAAGTCCGAGTGTAGAGGTG  
AAATTCGTAGATATTGGAAGAACACCAAGTGGCGAAGGCGACATACTGGCTCATTACTGACGCTGAGGCGGAAAGCGTG  
GGGAG

>ASV:1295:Genus:Butyricimonas  
TACGGGGGATGCGAGCGTTATCCGGATTTATGGGTTTAAAGGGCGCGTAGGCGGGACGACAAGTCAGCGGTAAAAGACT  
GCAGCTAAACTGTAGCACGCCGTTGAAACTGTGACCTGGAGACGAGACGAGGGAGGCGGAACAAGTGAAGTACGCGTGA  
AATGCATAGATATCACTTGAACCCCGATAGCGAAGGCGACTTCCAGGCTCGGTCTGACGCTGATGCGCGAGAGCGGTG  
GTAGC

>ASV:1296:Species:aureus/caprae/epidermidis  
TACGTAGGTGGCAAGCGTTATCCGGAATTTACTGGGCGTAAAGCGCGCGTAGGTTGGTTTTTTAAGTCTGATGTGAAAGCCC  
ACGGCTCAACCTGGAGGGTCAATGGAAACTGAAACTTGGAGTGCAGAAAGAGGAAAGTGGAAATTCATGTTAGCGGTG  
AAATGCGCAGAGATATGAGGGAACACCAAGTGGCGAAGGCGACTTCTGGTCTGTAACGACGCTGATGTGCGAAAGCGTG  
GGGAT

>ASV:1297:Genus:Ruminiclostridium\_6  
TACGTAGGTGGCAAGCGTTGTCGGGAATTTACTGGGTGTAAGGGAGGTAGGCGGGATGTCAAGTCAGAAGTAAAATTA  
CGGGCTCAACTCGTAACCTGCTTTTGAAGTGCATTTCTGAGTGAAGTAGAGGCAAGCGGAATTCCTAGTGTAGCGGTG  
AAATGCGTAGATATTAGGAGGAACACCAAGTGGCGAAGGCGGCTTCTGGGCTTTTACTGACGCTGAGGCTCGAAAGCGTG  
GGGAG

>ASV:1298:Genus:Clostridium\_sensu\_stricto\_1  
TACGTAGGTGGCAGCGTTGTCGGATTTACTGGGCGTAAAGGGAGCGTAGGTTGGATTTTTAAGTGAGATGTGAAATACT  
CGGGCTTAACTGAGTGTGCTGATTTCAAAGTCTAGAGTGCAGGAGAGGAGAAGGGAATTCCTAGTGTAGCGGTG  
AAATGCGTAGAGATTAGGAAGAACACCAAGTGGCGAAGGCGCTTCTGGACTGTAACGACGCTGAGGCTCGAAAGCGTG  
GGGAG

>ASV:1299:Genus:Ruminococcaceae\_UCG-008  
TACGTAGGGAGCAAGCGTTATCCGGATTTACTGGGTGTAAGGGCGAGTAGGCGGATTGGCAAGTTGGGAGTAAATGTC  
GGGGCTTAAACCCGGAAGTCTTCAAAGTGTGATCTTGGAGTGTGGAGAGGCGAGGCGGAATTCAGTGTAGCGGTG  
AAATGCGTAGATATTGGGAGGAACACCAAGTGGCGAAGGCGGCTTCTGGACTTAACTGACGCTGAGGAGCGAAAGCGTG  
GGGAG

>ASV:1300:Genus:Ruminococcus\_1  
TACGTAGGGAGCGAGCGTTGTCGGGAATTTACTGGGTGTAAGGGAGCGTAGGCGGGACGGAAGTCAGATGTGAAATACA  
TGGGCTCAACCCATGGGCTGCAATTTGAAACTGCTGTTCTTGGAGTGAAGTAGAGGTAAAGCGGAATTCCTGGTGTAGCGGTG  
AAATGCGTAGATATCAGGAGGAACACCGTGGCGAAGGCGGCTTACTGGGCTTTTACTGACGCTGAGGCTCGAAAGCGTG  
GGGAG

>ASV:1301:Genus:Veillonella  
TACGTAGGTGGCAAGCGTTGTCGGGAATTTACTGGGCGTAAAGGGCGCGCAGGCGGTTTTCTGAAGTCTGTCTTAAAAGTGC  
GGGGCTTAAACCCGTGAGGGGATGAAACTATGGAAGTGGAGTATCGGAGAGGAAAGCGGAATTCCTAGTGTAGCGGTG



AATGCGTAGATATTAGGAAGAACACCAAGTGGCGAAGGCGGCTTTCTGGACGACAACCTGACGCTGAGGCGCGAAAGCCAGG  
GGAGC  
>ASV:1302:Genus:Intestinibacter  
TACGTAGGGGCTAGCGTTATCCGGATTTACTGGGCGTAAAGGGTGCCTAGGCGGCTTTTAAAGTCAGGAGTGAAAGGCT  
ACGGCTCAACCGTAGTAAGCTCTTGAAGTGGAGACTTGAGTGCAGGAGAGAGAGTGAATTCTAGTGTAGCGGTGA  
AATGCGTAGATATTAGGAGGAACACCAAGTGGCGAAGGCGGCTCTCTGGACTGTAACCTGACGCTGAGGCGCGAAAGCGTGG  
GTAGC  
>ASV:1303:Genus:Megasphaera  
TACGTAGGTGGCAAGCGTTGTCCGGAATTTACTGGGCGTAAAGGGCGCGCAGGTGGTTTCTTAAGTCTGTCTTAAAAGTGC  
GGGGCTTAACCCCGTAGGGGACGAAAAGTGGGAGACTAGAGTATCGGAGAGGAAAGCGGAATTCTAGTGTAGCGGTGA  
AATGCGTAGATATTAGGAGGAACACCAAGTGGCGAAGGCGGCTTTCTGGACGACAACCTGACACTGAGGCGCGAAAGCCAGG  
GGAGC  
>ASV:1304:Family:Lachnospiraceae  
TACGTATGGTGAAGCGTTATCCGGATTTACTGGGTGTAAGGGAGCGTAGACGGATAGGCAAGTCTGAAGTGAAGGCC  
GGGGCTCAACCCGGGACTGCTTTGAAAAGTGTCTAGAGTGTGGAGAGGTAAGTGAATTCTAGTGTAGCGGTG  
AAATGCGTAGATATTAGGAGGAACACCAAGTGGCGAAGGCGGCTTACTGGACAGTAACCTGACGTTGAGGCTCGAAAGCGTG  
GGGAG  
>ASV:1305:Genus:Dorea  
TACGTAGGGGCAAGCGTTATCCGGATTTACTGGGTGTAAGGGAGCGTAGACGGCTGTGCAAGTCTGAAGTGAAGGCA  
TGGGCTCAACCTATGACTGCTTTGAAAAGTGTGCAGCTAGAGTGTGGAGAGGTAAGTGAATTCTAGTGTAGCGGTG  
AAATGCGTAGATATTAGGAGGAACACCAAGTGGCGAAGGCGGCTTACTGGACGATGACTGACGTTGAGGCTCGAAAGCGTG  
GGGAG  
>ASV:1306:Species:aquatica/texasensis/tilapiae  
TACAGAGGGTGAAGCGTTAATCGGAATTTACTGGGCGTAAAGCGCACGTAGGCGGTTTTTAAAGTCAGATGTGAAAGCCC  
CGGGCTCAACCTGGGAATTGCATTTGAAAAGTGTGAGAGGGGGTGAATTCAGTGTAGCGGTG  
AAATGCGTAGAGATTTGGAGGAATACCAAGTGGCGAAGGCGGCCCTTGGCACAACTGACGCTCAGGTGCGAAAGCGTG  
GGGAG  
>ASV:1307:Genus:Lactobacillus  
TACGTAGGTGGCAAGCGTTGTCCGGATTTACTGGGCGTAAAGCGAGTGCAGGCGGTTCAATAAGTTTGTGTAAGGCT  
TCGGCTCAACCGGAGATTGCATCAGAACTGTTGAACCTGAGTGCAGAAAGGAGAGTGAAGTCCATGTGTAGCGGTG  
GAATGCGTAGATATTAGGAGGAACACCAAGTGGCGAAGGCGGCTCTCTGGTCTGCAACTGACGCTGAGGCTCGAAAGCATG  
GGTAG  
>ASV:1308:Genus:Ruminococcaceae\_UCG-005  
TACGTAGGTGGCAAGCGTTGTCCGGATTTACTGGGTGTAAGGGCGGTAGGCGGAGATGCAAGTCAAGTGTGAAATCCT  
CGGGCTTAACCCGGGAAGTGCATTTGAAAAGTGTATCCCTTGGAGTATCGGAGAGGCGAGCAGAATTCAGTGTAGCGGTG  
AAATGCGTAGATATTAGGAGGAACACCAAGTGGCGAAGGCGGCTGCTGGACGACAACCTGACGCTGAGGCGCGAAAGCGTG  
GGGAG  
>ASV:1309:Species:desulfuricans  
TACGGAGGGTGAAGCGTTAATCGGAATTTACTGGGCGTAAAGCGCACGTAGGCTGTTGTGTAAGTCAAGGGTGAATCCC  
ACGGCTCAACCGTGAAGTGCCTTTGATACTGCACGACTTGAATCCGGGAGAGGGTGGCGGAATTCAGGTGTAGGAGTG  
AAATCCGTAGATATCTGGAGGAACATCAGTGGCGAAGGCGGCCACCTGGACCGGATTGACGCTGAGGTGCGAAAGCGTG  
GGGAG  
>ASV:1310:Genus:Ruminococcaceae\_UCG-010  
TACGTAGGTGGCGAGCGTTATCCGGATTTACTGGGTGTAAGGGTGTGAGGCGGGGTGCAAGTCAAGTGTGAAAAGTGT  
TGGGCTCAACCCACAAGTGCATTTGAAAAGTGTACTCTTGGAGTGGGAGAGGTAACCGGAATTCCTGGTGTAGTAGTG  
AAATGCGTAGATATCAGGAGGAACACCGTGGCGAAGGCGGTTTACTGGACCAACTGACGCTGAGACACGAAAGCGTG  
GGGAG  
>ASV:1311:Genus:Parabacteroides  
TACGGAGGATCCGAGCGTTATCCGGATTTATTGGGTTAAAGGGTGCCTAGGCGGCCTTTTAAAGTCAAGCGGTGAAAGTCT  
GTGGCTCAACCATAGAAATGCGGTTGAAAAGTGGGGGCTTGGAGTGTGTTGAGGCGAGGCGGAATGCGTGGTGTAGCGGTG  
AAATGCTTAGATATCACGAAGAACTCCGATTGCGAAGGCGAGTCACTGGAGCGCAACTGACGCTGAAGTCTGAAAGTGGC  
GGTAT  
>ASV:1312:Family:Erysipelotrichaceae  
TACGTAGGTGGCAAGCGTTATCCGGAATCATTGGGCGTAAAGGGTGCCTAGGTTGGCATGTTAAGTCCGTAGTAAAAGGCA  
ATGGCTCAACCATTTGAAGCTATGAAAAGTGGCAAGCTGGAGTGCAGAAAGAGGGCGATGGAATTCATGTGTAGCGGTAA  
AATGCGTAGATATTAGGAGGAACACCAAGTGGCGAAGGCGGCTGCCTGGTCTGTAACCTGACACTGAGGCGCGAAAGCGTGG  
GGAGC  
>ASV:1313:Species:capillosus  
TACGTAGGTGGCAAGCGTTATCCGGATTTACTGGGTGTAAGGGCGGTGAGGCGGGACTGCAAGTCAAGTGTGAAAACCA  
CGGGCTCAACCTGTGGCCTGCATTTGAAAAGTGTAGTCTTGGAGTGTGGAGAGGCAATCGGAATTCCTGTGTAGCGGTG  
AAATGCGTAGATATCAGGAGGAACACCAAGTGGCGAAGGCGGATTGCTGGACAGTAACCTGACGCTGAGGCGCGAAAGCGTG  
GGGAG  
>ASV:1314:Species:arlettae/aureus/cohnii/gallinarum/haemolyticus/nepalensis/saccharolyticus/  
saprophyticus/succinus/xylorus  
TACGTAGGTGGCAAGCGTTATCCGGAATTTACTGGGCGTAAAGCGCGCGTAGGCGGTTTTCTTAAGTCTGATGTGAAAGCCC  
ACGGCTCAACCGTGGAGGGTCAATGGAAAAGTGGGAACTTGGAGTGCAGAAAGAGGAAAGTGAATTCATGTGTAGCGGTG  
AAATGCGTAGATATTAGGAGGAACACCAAGTGGCGAAGGCGACTTTCTGGTCTGTAACCTGACGCTGATGTGCGAAAGCGTG  
GGGAT

>ASV:1315:Family:Ruminococcaceae  
TACGTAGGTGGCAAGCGTTATCCGGAATTACTGGGTGTAAAGGGAGCGCAGGCGGGATAGCAAGTCAGCGGTGAAATGCA  
TGGGCTTAACCTCATGAGCTGCCGTTGAAACTGTTATCTTGGAGTGGAGTAGAGGCAGGCGGAATTCAGGTGTAGCGGTG  
AAATGCGTAGATATTGAGGAACACCAAGTGGCGAAGGCGGCCTGCTGGGCTCTAACTGACGCTGAGGCTCGAAAGTGTG  
GGGAG

>ASV:1316:Genus:Ruminococcaceae\_UCG-005  
TACGTAGGTGGCAAGCGTTGTCCGGATTTACTGGGTGTAAAGGGCGTGTAGGCGGGAAGACAGGTCAGAAGTAAATGCC  
GGGGCTCAACCCCGGAGTGCATTTGAAACTGTTTCTTGGAGTATCGGAGAGGCAGGCGGAATTCCTAGGTGTAGCGGTG  
AAATGCGTAGATATTAGGAAGAACAACCAAGTGGCGAAGGCGGCCTGCTGGACGACAACTGACGCTGAGGCGCAAAGCGTG  
GGGAG

>ASV:1317:Species:fozii  
TACAGAGGTGCAAGCGTTAATCGGAATTACTGGGCGTAAAGGGAGCGTAGGTGGCTCTATAAGTCAGATGTGAAATCCC  
CGGGCTCAACCTGGGAAGTGCATCTGAAACTGTAGAGCTAGAGTATGTGAGAGGAAGGTAGAATTCAGGTGTAGCGGTG  
AAATGCGTAGATCTGAGGAATACCGATGGCGAAGGCAGCCTTCTGGCATAATACTGACACTGAGGCTCGAAAGCGTG  
GGTAG

>ASV:1318:Species:balustinum/indoltheticum/piscicola/piscium/scophthalmum/soldanellicola  
TACGGAGGTGCAAGCGTTATCCGGATTTATTGGGTTAAAGGGTCCGTAGGCGGATCTGTAAGTCAGTGGTAAATCTC  
ATAGCTTAACCTAGAACTGCCATTGAACTGCAGGCTTGGAGTAAAGTAAAGTAAAGTAAAGTAAAGTAAAGTAAAGTAAAGT  
AAATGCGTAGATATTACTTAGAACCAATTCGGAAGGCAGGCTACTATGTTTTAACTGACGCTGATGGACGAAAGCGTG  
GGGAG

>ASV:1319:Genus:Agathobacter  
TACGTATGGTGAAGCGTTATCCGGATTTACTGGGTGTAAAGGGAGCGCAGGCGGTGCGGCAAGTCTGATGTGAAAACCC  
GGGGCTCAACCCCGGACTGCATTTGAAACTGTCTGACTAGAGTGTGCGAGGGTAAGCGGAATTCCTAGGTGTAGCGGTG  
AAATGCGTAGATATTAGGAGGAACACCAAGTGGCGAAGGCGGCTTACTGGACGATAACTGACGCTGAGGCTCGAAAGCGTG  
GGGAG

>ASV:1320:Genus:Ruminococcaceae\_UCG-002  
TACGTAGGTGGCAAGCGTTGTCCGGATTTACTGGGTGTAAAGGGCGTGTAGCCGGTGGCAAGTCAAGTGTGAAATCCA  
CGGGCTCAACCTAGGACTGCATTTGAAACTGTTGATCTTGGAGTATCGGAGAGGCAATCGGAATTCCTAGGTGTAGCGGTG  
AAATGCGTAGATATTAGGAGGAACACCAAGTGGCGAAGGCGGATTGCTGGACGACAACTGACGCTGAGGCGCAAAGCGTG  
GGGAG

>ASV:1321:Genus:Streptococcus  
TACGTAGGTCCCGAGTGTGTCGGATTTATTGGGCGTAAAGCGAGCGCAGGCGGTTTGATAAGTCTGAAGTTAAAGGCT  
GTGGCTCAACCATAGTTCGCTTTGAAACTGTCAAACCTTGGAGTGCAGAAAGGGAGAGTGAATTCCTAGTGTAGCGGTGA  
AATGCGTAGATATATGAGGAACACCGGTGGCGAAAGCGGCTCTCTGGTCTGTAAGTACGCTGAGGCTCGAAAGCGTGG  
GGAG

>ASV:1322:Species:mucilaginoso  
TACGTAGGGCGCAGCGTTGTCCGGAATTATTGGGCGTAAAGAGCTTGTAGGCGGTTTGTGCGCTCTGCTGTGAAAGGCC  
GGGGCTTAACCTCGTGTATTGCAAGTGGTACGGGCGACTAGAGTGCAGTAGGGGAGACTGGAATTCCTGGTGTAGCGGT  
GGAATGCGCAGATATCAGGAGGAACACCGATGGCGAAGGCAGGCTCTGGGCTGTAAGTACGCTGAGGAGCGAAAGCAT  
GGGGA

>ASV:1323:Species:abscessus/chelonae/fortuitum/franklinii/fuerthensis/immunogenum/kansasii/n./  
saopaulense  
TACGTAGGGTCCGAGCGTTGTCCGGAATTACTGGGCGTAAAGAGCTCGTAGGTGGTTTGTGCGGTTGTTGCTGAAAACCTC  
ACAGCTTAACCTGTGGGCGTGGGGCGATACGGGCGACTAGAGTACTGCAGGGGAGACTGGAATTCCTGGTGTAGCGGTG  
GAATGCGCAGATATCAGGAGGAACACCGGTGGCGAAGGCGGCTCTGGGCAGTAACTGACGCTGAGGAGCGAAAGCGTG  
GGTAG

>ASV:1324:Genus:Lachnoclostridium  
TACGTAGGGGGCAAGCGTTATCCGGAATTACTGGGTGTAAAGGGAGCGTAGACGGCGAAGCAAGTCTGAAGTAAAACCC  
AGGGCTCAACCTAGGACTGCTTTGAAACTGTTTTGCTAGAGTGTGCGGAGAGGTAAGTGAATTCCTAGTGTAGCGGTG  
AAATGCGTAGATATTAGGAGGAACACCAAGTGGCGAAGGCGGCTTACTGGACGATAACTGACGTTGAGGCTCGAAAGCGTG  
GGGAG

>ASV:1325:Genus:Defluviitaleaceae\_UCG-011  
TACGTAGGGGGCAAGCGTTATCCGGAATTACTGGGTGTAAAGGGTGCCTAGGCGGTATGGCAAGTTTGTGTAACCCCA  
CAGGCTTAACCTGTGGCTTGCATCGAAAACCTACTGAACTAGAGTGCAGGAGAGGAAAGCGGAATTCCTAGTGTAGCGGTG  
AAATGCGTAGATATTAGGAAGAACAACCAAGTGGCGAAGGCGGCTTCTGGACTGCAACTGACGCTGAGGACGAAAGCGTG  
GGGAG

>ASV:1326:Genus:Ruminiclostridium\_5  
TACGTAGGGAGCGAGCGTTGTCCGGATTTACTGGGTGTAAAGGGTGCCTAGGCGGCGAGGCAAGTCAAGCGTGAATCTA  
TGGGCTTAACCCATAAACTGCCTTGAACCTGTTTTGCTTGGAGTGAAGTAGAGGTAGGCGGAATTCCTGGTGTAGCGGTG  
AAATGCGTAGAGATCGGAGGAACACCAAGTGGCGAAGGCGGCTTACTGGGCTTAACTGACGCTGAAGCACGAAAGCATG  
GGTAG

>ASV:1327:Genus:Bacteroides  
TACGGAGGATCCGAGCGTTATCCGGATTTATTGGGTTAAAGGGAGCGTAGGCGGTTGTTAAGTCAAGTGTGAAAAGTTT  
GCGGCTCAACCGTAAATGCAAGTGTACTGGCGACCTGAGTGAACAGAGGTAGGCGGAATTCCTGGTGTAGCGGTG  
AAATGCTTAGATATCACGAAGAACCTCGATTGCGAAGGCAGCTTACTGGATTGTAAGTACGCTGATGCTCGAAAGTGTG  
GGTAT

>ASV:1328:Genus:Lachnoclostridium  
TACGTAGGGGGCAAGCGTTATCCGGAATTACTGGGTGTAAAGGGAGCGTAGACGGTAAAGCAAGTCTGAAGTAAAAGCCC

GGGGCTCAACCCGGGACTGCTTTGAAACTGTTAACTGGAGTGTGGAGAGGTAAGCGGAATTCCTAGTGTAGCGGTG  
AAATGCGTAGATATTAGGAGGAACACCAGTGGCGAAGGCGGCTTACTGGACAGTAACGACGTTGAGGCTCGAAAGCGTG  
GGGAG

>ASV:1329:Species:aerolata/anadarae/aurantiaca/dokdonensis/faeni/ginsenosidivorax/mucosissima/  
panaciterrae

TACGGAGGGAGCTAGCGTTATTCGGAATTACTGGGCGTAAAGCGCACGTAGGCGGCTTTGTAAGTAAGAGGTGAAAGCCC  
AGAGCTCAACTCTGGAATTGCTTTTACAGTGCATCGCTTGAATCATGGAGAGGTGAGTGAATTCGAGTGTAGAGGTG  
AAATGCGTAGATATTGGAAGAACACCAGTGGCGAAGGCGGCTGACTGGACATGTATTGACGCTGAGGTGCGAAAGCGTG  
GGGAG

>ASV:1330:Family:Lachnospiraceae

TACGTATGGTCAAGCGTTATCCGGATTTACTGGGCTAAAGGGAGCGTAGACGGATGGGCAAGTCTGATGTGAAAACCC  
GGGGCTCAACCCGGGACTGCATTGAAACTGTTTATCTAGAGTGTGGAGAGGTAAGTGAATTCCTAGTGTAGCGGTG  
AAATGCGTAGATATTAGGAGGAACACCAGTGGCGAAGGCGGCTTACTGGACAGTAACGACGTTGAGGCTCGAAAGCGTG  
GGGAG

>ASV:1331:Genus:Erysipelotrichaceae\_UCG-003

TACGTAGGTGGCGAGCGTTATCCGGATTTACTGGGCTAAAGAGGGAGCAGGCGGCACTAAGGGTCTGTGGTAAAAGATC  
GAAGCTTAACTTCGTAAGCCATGAAACCGTAGAGCTAGAGTGTGTGAGAGGATCGTGAATTCATGTGTAGCGGTG  
AAATGCGTAGATATTGGAAGAACACCAGTGGCGAAGGCGGACATCTGGCGCAACTGACGCTCAGTCCGAAAGCGGTG  
GGAGC

>ASV:1332:Genus:Fusobacterium

TACGTATGTCGCAAGCGTTATCCGGATTTACTGGGCTAAAGCGCGTCTAGGTGGTTTGGTAAGTCTGATGTGAAAATGC  
GGGGCTCAACTCCGATTGCGTTGGAAACTGTCAAAGTAGAGTACTGGAGAGGTGGGCGGAACTACAAGTGTAGAGGTG  
AAATGCGTAGATATTTGAGGAATGCCGATGGAGAAGTCAAGCCACTGGACAGATACTGACGCTGAAGCGCGAAAGCGTGG  
GTAGC

>ASV:1333:Genus:Olsenella

TACGTAGGGGGCGAGCGTTATCCGGATTCATTGGGCGTAAAGCGCTCGTAGGCGGTCCGTTAGGTGGGAGTCAAATCCG  
GGGGCTCAACCCCGCCGCTCCCGATACCGGCGGACTTGAGTTGGTAGGGGAAGGCGGAATTCAGTGTAGCGGTG  
AAATGCGCAGATATTTGGAAGAACACCAGTGGCGAAGGCGGCTTCTGGGCCAAACTGACGCTGAGGAGCGAAAGCTAGG  
GGAGC

>ASV:1334:Genus:Pluralibacter

TACGGAGGGTCAAGCGTTAATCCGGAATTACTGGGCGTAAAGCGCACGCAGGCGGTCTGTCAAGTCGGATGTGAAATCCC  
CGGGCTCAACTCGGAACTGCATTGAAACTGGCAGGCTTGAGTCTCGTAGAGGGGGTAGAATTCAGGTGTAGCGGTG  
AAATGCGTAGAGATCTGGAGGAATACCGGTGGCGAAGGCGGCCCTTGGACGAAGACTGACGCTCAGGTGCGAAAGCGTG  
GGGAG

>ASV:1335:Genus:Oscillospira

TACGTAGGTGGCAAGCGTTGTCGGATTTACTGGGTGTAAGGGCGGTGAGCCGGAGAGACAAGTCAGATGTGAAATCCG  
CGGGCTCAACCCCGGAACTGCATTGAAACTGTTCCCTTGAGTATCGGAGAGGTAACCGGAATTCCTAGTGTAGCGGTG  
AAATGCGTAGATATTAGGAAGAACACCAGTGGCGAAGGCGGCTTACTGGACGACAACGACGCTGAGGCTCGAAAGCGTG  
GGGAG

>ASV:1336:Genus:Lachnospiraceae\_UCG-010

TACGTAGGGGGCAAGCGTTATCCGGAATTACTGGGCTAAAGGGAGTGTAGGCGGCACGCCAAGCCAGATGTGAAAGCCC  
GAGGCTTAACTCGCGGATTGCATTTGAAACTGGCAGCTAGAGTACAGGAGGAAAGCGGAATTCCTAGTGTAGCGGTG  
GAAATGCGTAGATATTAGGAAGAACACCAGTGGCGAAGGCGGCTTCTGGACTGAAACTGACGCTGAGGCTCGAAAGCGT  
GGGA

>ASV:1337:Genus:Blautia

TACGTAGGGGGCAAGCGTTATCCGATTTACTGGGTGTAAGGGAGCGTAGACGGTGTGGCAAGTCTGATGTGAAAGGCA  
TGGGCTCAACTGTGGATTGCAATTTGAAACTGTCATACTTGAAGTGCAGGAGGGTAAGCGGAATTCCTAGTGTAGCGGTG  
AAATGCGTAGATATTAGGAGGAACACCAGTGGCGAAGGCGGCTTACTGGACGTAACGACGTTGAGGCTCGAAAGCGTG  
GGGAG

>ASV:1338:Family:Peptococcaceae

TACGTAGGGGGCGAGCGTTGTCGGAACTACTGGGCGTAAAGGGCGGTAGGCGGTATAATAAGTCAGTGGTAAAACCT  
GGGGCTCAACCCCGGCTGCCACTGATACTGTTAACTTGAAGTATGGAAGAGGAGAATGGAATTCCTAGTGTAGCGGTG  
AAATGCGTAGATATTAGGAGGAACACCAGTGGCGAAGGCGATTCTCTGGCCAAGACTGACGCTGAGGCGCGAAAGCGTG  
GGGAG

>ASV:1339:Genus:Family\_XIII\_AD3011\_group

TACGTAGGGGGCAAGCGTTATCCGGAATTACTGGGCTAAAGGGAGTACGTAGGTGGTTTTCTAAGCACGGGGTTAAGGCA  
ATGGCTTAACTTGTGCGCTTGTGAACTGGAAGGCTTGAAGTGCAGGAGAGGAAAGCGGAATTCCTAGTGTAGCGGTG  
AAATGCGTAGATATTAGGAGGAACACCAGTGGCGAAGGCGGCTTCTGGACTGTAACGACACTGAGGTACGAAAGCGTGG  
GGAGC

>ASV:1340:Genus:Ruminococcaceae\_UCG-014

TACGTAGGGAGCGAGCGTTATCCGGAATTACTGGGCTAAAGGGTGCAGACGGGAGAAACAGTTAGTTGTGAAATACC  
TCGGCTCAACTGAGGAACTGCAACTAAAAGTACTTCTTGAAGTGCAGGAGAGGTAAGTGAATTCCTAGTGTAGCGGTG  
AAATGCGTAGATATTAGGAGGAACACCAGTGGCGAAGGCGACTTACTGGACTGTAACGACGTTGAGGCGCGAAAGCGTG  
GGGAG

>ASV:1341:Genus:Anaerostipes

TACGTAGGGGGCAAGTGTATCCGGAATTACTGGGCTAAAGGGTGCAGTGGTATGGCAAGTCAAGTAAAACCC  
AGGGCTTAACTCTGGGACTGCTTTTGAAGTGTGAGTGCAGGAGAGGTAAGCGGAATTCCTAGTGTAGCGGTG  
AAATGCGTAGATATTAGGAGGAACATCAGTGGCGAAGGCGGCTTACTGGACTGAAACTGACACTGAGGCGCGAAAGCGTG

GGGAG  
>ASV:1342:Genus:Bacteroides  
TACGGAGGATCCGAGCGTTATCCGGATTTATTGGGTTTAAAGGGAGCGTAGGCGGATTGTTAAGTCAGTTGTGAAAATTT  
GCGGCTCAACCGTAAAATTGCAGTTGATACTGGCAGTCTTGAGTGCAGTAGAGGTGGCGGAAATTCGTGGTGTAGCGGTG  
AAATGCTTAGATATCACGAAGAAGTCCGATTGCGAAGGCAGCTACTGGGTGTAAGTACGCTGATGCTCGAAAGTGTG  
GGTAT  
>ASV:1343:Genus:Acidovorax  
TGCCTAGGGTCAAGCGTTAATCGGAATTACTGGGCGTAAAGCGTGCAGGCGGTTATATAAGACAGATGTGAAATCCC  
CGGGCTCAACCTGGGAAGTGCATTTGTGACTGTATAGCTAGAGTACGGCAGAGGGGATGGAATTCGCGTGTAGCAGTG  
AAATGCTTAGATATGCGGAGGAACACCGATGGCGAAGGCAATCCCCTGGGCTGTACTGACGCTCATGCACGAAAGCGTG  
GGGAG  
>ASV:1344:Species:eria/echinoides/parapaucimobilis/paucimobilis/pseudosanguinis/sanguinis/  
yabuuchia/zeae  
TACGGAGGGGCTAGCGTTGTTGGAATTACTGGGCGTAAAGCGCACGTAGGCGGCTTTGTAAGTCAGAGGTGAAAGCCT  
GGAGCTCAACTCCAGAAGTGCCTTTGAGACTGCATCGCTTGAATCCAGGAGAGGTGAGTGAATTCGAGTGTAGAGGTG  
AAATTCGTAGATATTCGGAAGAACACCAAGTGGCGAAGGCGGCTGACTGGACTGGTATTGACGCTGAGGTGCGAAAGCGTG  
GGGAG  
>ASV:1345:Order:Bacteroidales  
TACGGAGGATGCAAGCGTTATCCGGATTTATTGGGTTTAAAGGGTGCAGGCGGAAATCCCAAGTCAGCGGTGAAATCTC  
CATGCTCAACATGGACTGCGGTTGAAACTGGAGTCTAGAGTGTAAATGAGGTAGGCGGAAATGCGTGGTGTAGCGGTG  
AAATGCATAGATATCACGAGAAGTCCGATTGCGAAGGCAGCTGCTGGGATACAAGTACGCTGAGGCACGAAAGCGTG  
GGTAT  
>ASV:1346:Genus:Ruminococcaceae\_NK4A214\_group  
TACGTAGGTGGCAGCGTTATCCGGATTTACTGGGTGTAAGGGCGCGTAGGCGGGAATGCAAGTCAGATGTGAAATCCA  
AGGGCTCAACCTTGAAGTGCATTTGAAACTGATTTCTTGAGTGTGGAGAGGTGACAGAATTCCTAGTGTAGCGGTG  
AAATGCTTAGATATAGGAGGAACACCAAGTGGCGAAGGCGGTCAACTGGACGATAACTGACGCTGAGGCGGAAAGCGTG  
GGGAG  
>ASV:1347:Genus:Subdoligranulum  
AACGTAGGGTCAAGCGTTGTCCGGAATTACTGGGTGTAAGGGAGCGCAGGCGGACCGGCAAGTTGGAAGTAAAACCTA  
TGGGCTCAACCCATAAATTGCTTTCAAAGTCTGGCCTTGAAGTGTGAGTGCAGAGGTAGGTGGAATTCGCGTGTAGCGGTG  
GAATGCTTAGATATCGGAGGAACACCAAGTGGCGAAGGCGACTTACTGGGCACCAACTGACGCTGAGGCTCGAAAGCATG  
GGTAG  
>ASV:1348:Genus:Ruminococcaceae\_UCG-014  
TACGTAGGGAGCAAGCGTTATCCGGATTTATTGGGTGTAAGGGTGCAGGCGGAAATTAAGTTAGTTGTGAAAGCCC  
TCGGCTTAACTGAGGAACTGCAACTAAAAGTGGATTTCTTGAGTGTGGAGAGGAAAGCGGAAATTCCTAGTGTAGCGGTG  
AAATGCTTAGATATAGGAGGAACACCAAGTGGCGAAGGCGGCTTTCTGGACAATAACTGACGTTGAGGCACGAAAGTGTG  
GGGAG  
>ASV:1349:Genus:Parabacteroides  
TACGGAGGATCCGAGCGTTATCCGGATTTATTGGGTTTAAAGGGTGCAGGCGGCTTTTAAAGTCAGCGGTGAAAGTCT  
GTGGCTCAACCATAGAAATGCGGTTGAAACTGGGGGCTTGAGTATGTTTGAGGCAGGCGGAAATGCGTGGTGTAGCGGTG  
AAATGCTTAGATATCACGAGAACCCGATGGCGAGGCGAGCTGCCAAGCCATGACTGACGCTGATGCACGAAAGCGTG  
GGGAT  
>ASV:1350:Genus:Odoribacter  
TACGGAGGATGCGAGCGTTATCCGGATTTATTGGGTTTAAAGGGTGCAGGCGGTTTATTAAGTTAGTGGTTAAATATT  
TGAGCTAAACTCAATTTGTGCCATTAATACTGGTAAACTGGAGTACAGACGAGGTAGGCGGAAATTAAGTTAAGTACGCGGTG  
AATGCATAGATATAACTTAGAACTCCGATAGCGAAGGCGAGCTTACCAGACTGAAACTGACGCTGATGCACGAGAGCGGTG  
GTAGC  
>ASV:1351:Genus:Ruminococcaceae\_UCG-003  
TACGTAGGTGGCAAGCGTTGTCCGGATTTACTGGGTGTAAGGGCGTGCAGCCGGGCATGCAAGTCAGATGTGAAATCTC  
AGGGCTCAACCTGAAACTGCATTTGAAACTGTATGTCTTGAGTGCCGGAGAGGTAATCGGAATTCCTGTGTAGCGGTG  
AAATGCTTAGATATAAGGAAGAACACCAAGTGGCGAAGGCGGATTACTGGACGTAAGTACGCTGAGGCGGAAAGCGTG  
GGGAG  
>ASV:1352:Genus:Lachnoclostridium  
TACGTAGGGGGCAAGCGTTATCCGGATTTACTGGGTGTAAGGGAGCGTAGACGGCTTAGCAAGTCTGAAGTAAAAGCCC  
GGGGCTCAACCCGGGACTGCTTTGAAACTGTTAAGCTGGAGTGTGGAGAGGTAAGTGAATTCCTAGTGTAGCGGTG  
AAATGCTTAGATATAGGAGGAACACCAAGTGGCGAAGGCGGCTTACTGGACAGTAAGTACGCTTGGGCTCGAAAGCGTG  
GGGAG  
>ASV:1353:Genus:Ruminococcaceae\_UCG-003  
TACGTAGGTGGCAAGCGTTGTCCGGATTTACTGGGTGTAAGGGCGTGCAGCCGGGCATGCAAGTCAGATGTGAAATCTC  
AGGGCTTAACTGAAACTGCATTTGAAACTGCATGTCTTGAGTGCCGGAGAGGTAATCGGAATTCCTGTGTAGCGGTG  
AAATGCTTAGATATAAGGAAGAACACCAAGTGGCGAAGGCGGATTACTGGACGTAAGTACGCTGAGGCGGAAAGCGTG  
GGGAG  
>ASV:1354:Genus:Faecalibacterium  
AACGTAGGTCAAGCGTTGTCCGGAATTACTGGGTGTAAGGGAGCGCAGGCGGGAAGACAAGTTGGAAGTAAAACCTA  
TGGGCTCAATCCATAAAGTGTCTTTCAAAGTGTCTTTCTTGAGTGTGAGTGCAGAGGTAGGCGGAAATTCGCGTGTAGCGGTG  
GAATGCTTAGATATCGGAGGAACACCAAGTGGCGAAGGCGGCTTACTGGGCACCAACTGACGCTGAGGCTCGAAAGTGTG  
GGTAG  
>ASV:1355:Family:Lachnospiraceae

TACGTAGGGGGCAAGCGTTATCCGGATTTACTGGGTGTAAAGGGAGCGTAGACGGAAGTGAAGTCAGAAGTGAAAGGCC  
GGGGCTTAACCCCGGACTGCTTTTAAAAGTGTGCATCTAGAGTGCAGGAGAGGTAAGCGGAATTCCTAGTGTAGCGGTG  
AAATGCGTAGATATTAGGAGGAACACCGGTGGCGAAGGCGGCTTACTGGACTGTAACGACGTTGAGGCTCGAAAGCGTG  
GGGAG

>ASV:1356:Genus:Butyricicoccus

TACGTAGGGAGCAAGCGTTATCCGGATTTACTGGGTGTAAAGGGCGCGCAGGCGGGCCGGTAAGTTGGAAGTGAAATCTG  
TGGGCTTAACCCATAAACTGCTTTCAAAGTGTGCTTCTGAGTGATGGAGAGGCAAGCGGAATTCCTGTGTAGCGGTG  
AAATGCGTAGATATACGGAGGAACACCACTGGCGAAGGCGGCTTCTGGACATTAACGACGCTGAGGCGCGAAAGCGTG  
GGGAG

>ASV:1357:Family:Ruminococcaceae

TACGTAGGGAGCAAGCGTTATCCGGATTTACTGGGTGTAAAGGGCGGTAGGCGGGATGGCAAGTCAGATGTGAAAACCTA  
TGGGCTCAACCCATAGCCTGCATTTGAAAGTGTGCTTCTGAGTGATGGAGAGGCAAGCGGAATTCCTGTGTAGCGGTG  
AAATGCGTAGATATACGGAGGAACACCACTGGCGAAGGCGGCTTCTGGACATTAACGACGCTGAGGCGCGAAAGCGTG  
GGGAG

>ASV:1358:Genus:Coprobacter

TACGGAAGATGCGAGCGTTATCCGGATTTATTGGGTTAAAGGGTGCCTAGGCGGAAGGATAAGTCAGCGGTGAAATGCT  
TCAGCTCAACTGGAGAATTGCCGATGAAACTGTTTTCTAGAGTATAAAGAGGATGCGGAATGCGTGGTGTAGCGGTG  
AAATGCGTAGATATACGCGAAGCCCGATTGCGAAGGCGAGCTACTGGCTATAACTGACGCTGAAGCACGAAAGCGTG  
GGTAT

>ASV:1359:Family:Lachnospiraceae

TACGTATGGAGCAAGCGTTATCCGGATTTACTGGGTGTAAAGGGTGCCTAGGTGGCAGTGAAGTCAGATGTGAAAGGCC  
GGGGCTCAACCCCGGAGCTGCATTTGAAAGTGTGCTCGCTAGAGTACAGGAGAGGCAAGCGGAATTCCTAGTGTAGCGGTG  
AAATGCTTAGATATACGGAAGAACTCCGATTGCGAAGGCGAGCTTCTGGACTGTAACGACGCTGATGCTCGAAAGTGTG  
GGTAT

>ASV:1360:Genus:Ruminiclostridium\_5

TACGTAGGGAGCAAGCGTTGTCCGGATTTACTGGGTGTAAAGGGTGCCTAGGCGGATTGGCAAGTCAGTAGTAAATCCA  
TGGGCTTAACCCATGACGTGCTATTGAAAGTGTGATCTTGGAGTGAAGTAGAGGTAGCGGAATTCCTGGTGTAGCGGTG  
AAATGCGTAGATATCGGAGGAACACCACTGGCGAAGGCGGCTTACTGGGCTTAACTGACGCTGAGGCACGAAAGCATG  
GGTAG

>ASV:1361:Genus:Faecalitalea

TACGTAGGTGGCAAGCGTTATCCGGAATGATTGGGCGTAAAGGGTGCCTAGGTGGTGGGATAAGTCTGAAGTAAAGGCA  
ACAGCTCAACTGTTGTTTCGCTTCGGAAGTGTGCTACTAGAGTGCAGGAGAGGGCGATGGAATTCATGTGTAGCGGTAA  
AATGCGTAGATATATGGAGGAACACCACTGGCGAAGGCGGCTGCCTGGCTGCAACTGACACTGATGACGAAAGCGTGG  
GGAGC

>ASV:1362:Family:Lachnospiraceae

TACGTATGGTGAAGCGTTATCCAGATTTACTGGGTGTAAAGGGAGCGTAGACGGAGTGGCAAGTCTGATGTGAAAACCC  
GGGGCTCAACCCCGGACTGCATTTGAAAGTGTCAATCTAGAGTACCAGGAGAGGTAAGCGGAATTCCTAGTGTAGCGGTG  
AAATGCGTAGATATTAGGAGGAACACCACTGGCGAAGGCGGCTTACTGGACGTTAACTGACGTTGAGGCTCGAAAGCGTG  
GGGAG

>ASV:1363:Family:Ruminococcaceae

TACGTAGGTGGCAAGCGTTGTCCGGAATTTACTGGGTGTAAAGGGTGCAGGCGGGTAGTCAAGTTAGATGTGAAAACCTA  
TGGGCTTAACCCATAGACTGCATTTGAAAGTGTCAATCTAGAGTACCAGGAGAGGTAAGCGGAATTCCTAGTGTAGCGGTG  
GAATGCGTAGATATTAGGAGGAACACCACTGGCGAAGGCGGCTTCTGGGCTTAACTGACGCTGAGGCACGAAAGCATG  
GGGAG

>ASV:1364:Genus:Ruminococcaceae\_UCG-005

TACGTAGGTGGCAAGCGTTGTCCGATTTACTGGGTGTAAAGGGCGGTAGGCGGGAAGACAGGTGATGTGAAATGCC  
GGGGCTCAACCCCGGACTGCATTTGAAAGTGTCAATCTAGAGTACCAGGAGAGGTAAGCGGAATTCCTAGTGTAGCGGTG  
AAATGCGTAGATATTAGGAGGAACACCACTGGCGAAGGCGGCTTCTGGACGAACTGACGCTGAGGCGCGAAAGCGTG  
GGGAG

>ASV:1365:Species:parvulum

TACGTAGGGGGCAAGCGTTATCCGGATTCATTGGGCGTAAAGCGCTCGTAGGCGGTCTGTTAGGTGCGGAGTTAAATCCG  
GGGGCTCAACCCCGTTCGCTCCCGATACCGGACAGACTTGAGTTTGGTAGGGGAAGGTGGAATTCCTAGTGTAGCGGTGG  
AATGCGCAGATATTAGGAAGAACACCACTGGCGAAGGCGGCTTCTGGGCCATAACTGACGCTGAGGAGCGAAAGCTAGG  
GGAGC

>ASV:1366:Family:Lachnospiraceae

TACGTAGGGGGCAAGCGTTATCCGGATTTACTGGGTGTAAAGGGAGCGTAGACGGCATGACAAGTCTGAAGTAAAGGCC  
GGGGCTCAACCCCGGACTGCTTTGAAAGTGTGCAAGGCTAGAGTGCAGGAGAGGTAAGTGAATTCCTAGTGTAGCGGTG  
AAATGCGTAGATATTAGGAGGAACACCACTGGCGAAGGCGGCTTACTGGACTGTAACGACGTTGAGGCTCGAAAGCGTG  
GGGAG

>ASV:1367:Species:sedimentorum

TACGTAGGGGGCTAGCGTTATCCGGAATTTACTGGGCGTAAAGGGTGCCTAGGTGGTTTCTTAAGTCAGAGGTGAAAGGCT  
ACGGCTCAACCCGAGTAAAGCCTTTGAAAGTGTGAAAGTGTGAGTGCAGGAGAGGAGAGTGAATTCCTAGTGTAGCGGTG  
AATGCGTAGATATTAGGAGGAATACCACTGGCGAAGGCGGCTTCTGGACTGTAACGACACTGAGGCACGAAAGCGTGG  
GGAGC

>ASV:1368:Genus:Ruminococcus\_2

TACGTAGGGAGCAAGCGTTGTCCGGATTTACTGGGTGTAAAGGGTGCCTAGGCGGCTTTCGAAAGTCAAGTCAAGTGTGAAATCTA  
TGGGCTCAACCCATAGCCTGCATTTGAAAGTGTGAGAGCTTGGAGTGAAGTGAAGGAGGAGGTAAGTGAATTCCTAGTGTAGCGGTG  
AAATGCGTAGATATTAGGAGGAACACCACTGGCGAAGGCGGCTTACTGGGCTTAACTGACGCTGAGGCACGAAAGCGTG

GGTAG  
>ASV:1369:Genus:Dialister  
TACGTAGGTGGCAAGCGTTGTCCGGAATTATTGGGCGTAAAGCGCGCAGGCGGCTTCCCAAGTCCCTCTTAAAAGTGC  
GGGGCTTAACCCCGTATGGGAAGGAACTGGGAAGCTGGAGTATCGGAGAGGAAAGTGAATTCTAGTGTAGCGGTGA  
AATGCGTAGAGATTAGGAAGAACACCGGTGGCGAAGGCGACTTTCTGGACGAAAAGTACGCTGAGACGCGAAAGCGTGG  
GGAGC  
>ASV:1370:Genus:Paramesorhizobium  
TACGAAGGGGGCTAGCGTTGTTCGGATTACTGGGCGTAAAGCGCACGTAGGCGGATTTTTAAGTCAGGGGTGAAATCC  
GGGGCTCAACCCCGGAAGTGCCTTTGATACTGGAAGTCTTGAGTGTGGAAAGAGGTGAGTGAATTCCGAGTGTAGAGGTG  
AAATTCGTAGATATTCGGAGGAACACCAAGTGGCGAAGGCGGCTCACTGGTCCATTACTGACGCTGAGGTGCGAAAGCGTG  
GGGAG  
>ASV:1371:Genus:Family\_XIII\_AD3011\_group  
TACGTAGGGGGCAAGCGTTATCCGGAATTATTGGGCGTAAAGAGTGCCTAGGTGGTTACCTAAGCAGGGGTGAAAGGCT  
ATGGCTTAACCATAGTTAGCCCTGAACTGGGCTACTTGAGTGCAGGAGAGGAAAGCGGAATTCTAGTGTAGCGGTGA  
AATGCGTAGATATTAGGAGGAACACCAAGTGGCGAAGGCGGCTTTCTGGACTGTAAGTACACTGAGGCACGAAAGTGTGG  
GGAGC  
>ASV:1372:Genus:Family\_XIII\_AD3011\_group  
TACGTAGGGGGCAAGCGTTATCCGGAATTATTGGGCGTAAAGAGTACGTAGGTGGTTACCTAAGCACAGGTATAAGGCA  
ATGGCTCAACCATTTGTCGCTTGTGAACTGGGCTACTTGAGTGCAGGAGAGGAAAGCGGAATTCTAGTGTAGCGGTGA  
AATGCGTAGATATTAGGAGGAACACCAAGTGGCGAAGGCGGCTTTCTGGACTGTAAGTACACTGAGGTACGAAAGCGTGG  
GGAGC  
>ASV:1373:Genus:Family\_XIII\_AD3011\_group  
TACGTAGGGGGCAAGCGTTATCCGGAATTATTGGGCGTAAAGAGTACGTAGGTGGTTACCTAAGCACAGGGTTTAAAGGCA  
ATGGCTTAACCATTTGTCGCTTGTGAACTGGGCTACTTGAGTGCAGGAGAGGAAAGCGGAATTCTAGTGTAGCGGTGA  
AATGCGTAGATATTAGGAGGAACACCAAGTGGCGAAGGCGGCTTTCTGGACTGTAAGTACACTGAGGTACGAAAGCGTGG  
GGAGC  
>ASV:1374:Family:Ruminococcaceae  
TACGTAGGTGGCAAGCGTTGTCCGGAATTACTGGGTGTAAGGGAGCGCAGGCGGGAGCAGTCAAGTCAAGTGTGAAAAC  
CAGGCTTAACCTGTAGACTGCAGTTGAAACTGGTTTTCTTGAGTGAAGTAGAGTTGGCGGAATTCCGAGTGTAGCGGTG  
AAATGCGTAGATATTAGGAGGAACACCAAGTGGCGAAGGCGGCTTTCTGGACTGTAAGTACACTGAGGTACGAAAGCGTGG  
GGAGC  
>ASV:1375:Genus:Cloacibacterium  
TACGGAGGGTGCAAGCGTTATCCGGAATTATTGGGTTAAAGGGTCCGTAGGCGGACTTATAATTCAGTGGTAAAAGCCT  
GTCGCTTAACGATAGAAGTCCATTGATACTGTAAGTCTTGAGTATATTTGAGGTAGCTGGAATAAGTAGTGTAGCGGTG  
AAATGCGTAGATATTACTTAGAACCAATTGCGAAGGCGAGTTACCAAGATATAACTGACGCTGAGGGACGAAAGCGTGG  
GGAGC  
>ASV:1376:Genus:Blautia  
TACGTAGGGGGCAAGCGTTATCCGGAATTACTGGGTGTAAGGGAGCGTAGACGGTGTGGCAAGTCTGATGTGGAAGGCA  
TGGGCTCAACCTGTGGACTGCATTGAAACTGTCATACTTGAGTGCAGGAGGGTAAGCGGAATTCTAGTGTAGCGGTG  
AAATGCGTAGATATTAGGAGGAACACCAAGTGGCGAAGGCGGCTTACTGGACGTAAGTACGCTTGGAGGCTCGAAAGCGTG  
GGGAGC  
>ASV:1377:Genus:Staphylococcus  
TACGTAGGTGGCAAGCGTTATCCGGAATTATTGGGCGTAAAGAGCGCGTAGGCGGTTTTTTAAGTCTGATGTGAAAGCCC  
ACGGCTCAACCGTGGAGGGTCAATTGAAACTGAAAACCTTGAGTGCAGAGAGGAAAGTGAATTCCATGTGTAGCGGTG  
AAATGCGCAGAGATATTGGAGGAACACCAAGTGGCGAAGGCGACTTTCTGGTCTGTAAGTACGCTGATGTGCGAAAGCGTG  
GGGAT  
>ASV:1378:Genus:Christensenellaceae\_R-7\_group  
TACGTAGGGGGCGAGCGTTGTCCGGAATGACTGGGCGTAAAGGGCGTGTAGGCGGGGATTAAGTCTGGAGTAAAAGTCC  
TGCTTCAAGGTGGGAACTGCTTTGGATACTGGTTTCTTGAGTGCAGGAGAGGTAAGTGAATTCCAGTGTAGCGGTG  
AAATGCGTAGAGATTGGGAGGAACACCAAGTGGCGAAGGCGACTTACTGGGCGTAAAGTACGCTGAGGCGCGAAAGCGTG  
GGGAGC  
>ASV:1379:Genus:Ruminococcaceae\_NK4A214\_group  
TACGTAGGTGGCAAGCGTTATCCGGAATTACTGGGTGTAAGGGCGCGTAGGCGGGGATGCAAGTCAAGTGTGAAATCTA  
TGGGCTTAACCCATAAAGTGCATTTGAAACTGTGTCTTGGAGTGCAGGAGGTAGACGGAATTCTTGTGTAGCGGTG  
AAATGCGTAGATATAAGGAAGAACACCAAGTGGCGAAGGCGGCTTACTGGACAGTAAGTACGCTGAGGCGCGAAAGCGTG  
GGGAGC  
>ASV:1380:Genus:Catabacter  
TACGTAGGGAGCGAGCGTTGTCCGGAATTACTGGGCGTAAAGGGTGCCTAGGTGGTCAAGTAAAGTCAAGTGTGAAAGACC  
GGGGCTTAACCCCGGATTGCAATTTGAAACTGTTTACTTGAGTACAGGAGAGGGAAGTGAATTCTAGTGTAGCGGTG  
AAATGCGTAGATATTAGGAGGAACACCAAGTGGCGAAGGCGACTTTCTGGACTGCAACTGACACTGAGGCACGAAAGCGTG  
GGGAGC  
>ASV:1381:Genus:Family\_XIII\_AD3011\_group  
TACGTAGGGGGCAAGCGTTATCCGGAATTATTGGGCGTAAAGAGTGCCTAGGTGGTTACCTAAGCAGAGGGTAAAAGGCA  
CTGGCTTAACCAATGTGAGCCCTGAACTGGGTACTTGAGTGCAGGAGAGGAAAGCGGAATTCTAGTGTAGCGGTGA  
AATGCGTAGATATTAGGAGGAACACCAAGTGGCGAAGGCGGCTTTCTGGACTGTAAGTACACTGAGGCACGAAAGTGTGG  
GGAGC  
>ASV:1382:Genus:Paraprevotella  
TACGGAAGATGCGAGCGTTATCCGGAATTATTGGGTTAAAGGGAGCGTAGGCGGGTTTTAAGTCAAGCGGTCAATGTG

ACGGCTCAACCGTGGCCAGCCGTTGAAACTGCAAGCCTTGAGTCTGCACAGGGCACATGGAATTCGTGGTGTAGCGGTGA  
AATGCTTAGATATCACGAAGAACTCCGATCGCGAAGGCATTGTGCCGGGCGAGCACTGACGCTGAGGCTCGAAAGTGGCG  
GTATC  
>ASV:1383:Genus:Lachnoclostridium  
TACGTAGGGGGCAAGCGTTATCCGGATTTACTGGGTGTAAGGGGAGCGTAGACGGGAGCAAGTCTGAAGTGAAGCCC  
AGGGCTCAACCTGGGACTGCTTTGAAACTGTTGACCTAGAGTGTGGAGAGGTAAGTGAATTCCTAGTGTAGCGGTG  
AAATGCGTAGATATTAGGAGGAACACCAGTGGCGAAGGCGGCTTACTGGACAGTGACTGACGTTGAGGCTCGAAAGCGTG  
GGGAG  
>ASV:1384:Genus:Ruminococcaceae\_UCG-014  
TACGTAGGGAGCAAGCGTTATCCGGATTTATTGGGTGTAAGGGTGCCTAGACGGGAAAGCAAGTTAGTTGTGAAATCCC  
TCGGCTTAACCTGAGAACTGCAACTAAAAGTGTCTTCTGAGTGTGGAGAGGAAAGTGAATTCCTAGTGTAGCGGTG  
AAATGCGTAGATATTAGGAGGAACACCAGTGGCGAAGGCGACTTCTGGACAATAACTGACGTTGAGGCACGAAAGTGTG  
GGGAG  
>ASV:1385:Genus:Anaeroplasma  
TACGTAGGGGGCAAGCGTTATCCGGAATTATTGGGCGTAAAGGGTGCCTAGGCGGGTTATCAAGTCTTTGGTTAAAATGC  
GGTGTCAACCCGCTAGTGCCAAAGAACTGATAGTCTAGAGTATGGTAGAAGTGAGTGAAGTCCATGTGTAGCGGTAA  
AATGCGTAAATATATGGAAGAACACCAGTGGCGAAGGCGGCTCACTAGGCCAATACTGACGCTGAGACACGAAAGCGTGG  
GGAG  
>ASV:1386:Genus:Shuttleworthia  
TACGTATGGAGCAAGCGTTATCCGGATTTACTGGGTGTAAGGGGAGTGTAGGCGGCATGGCAAGTCTGATGTGAAAATCC  
GGGGCTTAACCCCGGACTGCTTTGAAACTGTGACGCTGGAGTGTGGAGAGGTAAGTGAATTCCTAGTGTAGCGGTG  
AAATGCGTAGATATTAGGAGGAACACCAGTGGCGAAGGCGGCTTACTGGACGACAACGACGCTGAGGCTCGAAAGCGTG  
GGGAG  
>ASV:1387:Genus:Faecalibacterium  
AACGTAGGCCACAAGCGTTGTCCGGAACTACTGGGTGTAAGGGGAGCGCAGGCGGGAAGACAAGTTGGAAGTGAATCTA  
TGGGCTCAACCCATAAACTGCTTTCAAAGTGTCTTCTGAGTAGTGCAGAGGTAGGCGGAATTCCTGGTGTAGCGGTG  
GAATGCGTAGATATCGGAGGAACACCAGTGGCGAAGGCGGCTCACTGGCCAACTGACGCTGAGGCTCGAAAGTGTG  
GGTAG  
>ASV:1388:Genus:Lachnospiraceae\_UCG-003  
TACGTAGGGGGCAAGCGTTATCCGGATTTACTGGGTGTAAGGGGAGCGTAGATGGCATGGCAAGTCTGAAGTGAAGCCC  
GGGGCTTAACCCAGGACTGCTTTGAAACTGTTAAGCTAGAGTGCAGGAGAGGTAAGCGGAATTCCTAGTGTAGCGGTG  
AAATGCGTAGATATTAGGAGGAACATCGGTGGCGAAGGCGGCTTACTGGACTGTAACGACATTGAGGCTCGAAAGCGTG  
GGGAG  
>ASV:1389:Genus:Clostridium\_sensu\_stricto\_1  
TACGTAGGTGGCGAGCGTTGTCCGGATTTACTGGGCGTAAAGGGAGCGTAGGCGGATTTTAAAGTGTGAGTGTGAAATCT  
CGGGCTTAACCTGAGTGTGCTATTTCAAAGTGTAGAGTGCAGGAGAGGAGAAGGGAATTCCTAGTGTAGCGGTG  
AAATGCGTAGAGATTAGGAAGAACACCAGTGGCGAAGGCGGCTTCTCTGGACTGTAACGACGCTGAGGCTCGAAAGCGTG  
GGGAG  
>ASV:1390:Genus:Chungangia  
TACGTAGGTGGCAAGCGTTGTCCGGATTTATTGGGCGTAAAGCGCGCAGGCGGTCCTTTAAGTCTGATGTGAAATCTT  
GCGGCTCAACCCGCAAGCGGTATTGGAAGTGGGGGACTTGGTGCAGAAAGAGGAAAGCGGAATTCACGCTGTAGCGGTG  
AAATGCGTAGAGATTGGAGGAACACCAGTGGCGAAGGCGGCTTCTGGTCTGTAACGACGCTGAGGCGGAAAGCGTG  
GGGAG  
>ASV:1391:Species:flava/lactamica/macacae/meningitidis/mucosa/perflava/pharyngis/polysaccharea/  
sicca  
TACGTAGGGTGCAGCGTTAATCGGAATTACTGGGCGTAAAGCGGGCGCAGACGGTTACTTAAAGCAGGATGTGAAATCCC  
CGGGCTCAACCTGGGAAGTGTCTGAACTGGTACTAGAGTGTGTGAGAGGGAGGTAGAATTCACGCTGTAGCAGTGT  
AAATGCGTAGAGATTGGAGGAATACCGATGGCGAAGGCGGCTTCTGGATAACACTGACGTTTATGCCCGAAAGCGTG  
GGTAG  
>ASV:1392:Genus:Faecalibacterium  
AACGTAGGTCAACAAGCGTTGTCCGGAATTACTGGGTGTAAGGGGAGCGCAGGCGGGAGAACAAGTTGGAAGTGAATTC  
TGGGCTCAACCCATGAAGTGTCTTTCAAAGTGTCTTCTGAGTAGTGCAGAGGTAGGCGGAATTCCTGGTGTAGCGGTG  
GAATGCGTAGATATCGGAGGAACACCAGTGGCGAAGGCGGCTTACTGGCCAACTGACGCTGAGGCTCGAAAGTGTG  
GGTAG  
>ASV:1393:Genus:Ruminiclostridium\_5  
TACGTAGGGAGCGAGCGTTGTCCGGATTTACTGGGTGTAAGGGTGCCTAGGCGGATTGGCAAGTCAAGTGAATTC  
TGGGCTTAACCCATGAAGTGTCTTTGAAACTGTTAATCTTGGTGAAGTAGAGGTAGGCGGAATTCCTGGTGTAGCGGTG  
AAATGCGTAGAGATTGGAGGAACACCAGTGGCGAAGGCGGCTTACTGGCTTAACTGACGCTGAGGCACGAAAGTGTG  
GGTAG  
>ASV:1394:Genus:Christensenellaceae\_R-7\_group  
TACGTAGGGGGCGAGCGTTGTCCGGAATGATTGGGCGTAAAGGGGCGTGTAGGCGGCTTTATAAGTCTGGAGTGAAGTCC  
TGTCTTCAAGATGGGAATTGCTTTGGATACTGTAGGCGCTGAGTGCAGGAGAGGTTATCGGAATTCCTGGTGTAGCGGTG  
AAATGCGTAGAGATTGGAGGAACACCAGTGGCGAAGGCGGTAACGGACTGCAACTGACGCTGAGGCGGAAAGTGTG  
GGGAG  
>ASV:1395:Family:Lachnospiraceae  
TACGTATGGAGCAAGCGTTATCCGGATTTACTGGGTGTAAGGGTGCCTAGGTCAGTGGCAGTGAAGTCAAGTGTGAAAGCCC  
GGGGCTCAACCCCGGAGCTGCTTTGAAACTGCTCGGCTAGAGTACAGGAGAGGCGGGAATTCCTAGTGTAGTGGTGT  
AAATGCGTAGATATTAGGAGGAACACCAGTGGCGAAGGCGGCTGCTGGACTGTTACTGACACTGAGGCACGAAAGCGTG

GGGAG

>ASV:1396:Genus:Negativibacillus

TACGTAGGTGGCAAGCGTTGTCCGGAATTACTGGGTGTAAGGGGAGCGTAGCGGGGAGGCAAGTTGAATGTCTAAACTA  
TCGGCTCAACTGATAGTCGCGTTCAAACCTGCCACTCTTGAGTGCAGTAGAGGTAGGTGGAATTCCTAGTGTAGCGGTGA  
AATGCGTAGATATTAGGAGGAACACCAGTGGCGAAGGCGGCTACTGGGCTGTAAGTACGCTGAGGCTCGAAAGCGTGG  
GTAGC

>ASV:1397:Family:Lachnospiraceae

TACGTAGGGGGCAAGCGTTATCCGGATTTACTGGGTGTAAGGGGAGCGTAGACGGAGCAGCAAGTCTGATGTGAAAACCC  
GGGGCTCAACTCCGGGACTGCATTGGAAACTGTTGATCTGGAGTGCCGGAGAGGTAAGCGGAATTCCTAGTGTAGCGGTG  
AAATGCGTAGATATTAGGAGGAACACCAGTGGCGAAGGCGGCTTACTGGACGGTAAGTACGCTTGGAGCTCGAAAGCGTG  
GGGAG

>ASV:1398:Genus:Lachnospiraceae\_UCG-010

TACGTAGGGGGCAAGCGTTATCCGGATTTACTGGGTGTAAGGGGAGCGTAGGCGGCACGCCAAGCCAGATGTGAAAGCC  
GAGGCTTAACTCCGGGATTGCATTTGAACTGGCGAGCTAGAGTACAGGAGAGGAAAGCGGAATTCCTAGTGTAGTGGT  
GAAATGCGTAGATATTAGGAAGAACCAGTGGCGAAGGCGGCTTCTGGACTGAACTGACGCTGAGGCTCGAAAGCGT  
GGGGA

>ASV:1399:Genus:Butyricimonas

TACGGGGGATGCGAGCGTTATCCGGATTTATTGGGTTAAAGGGCGCGTAGGCGGGATGACAAGTACAGCGTAAAAGACT  
GCAGCTAAACTGTAGCACGCCGTTGAACTGTCTGCTTGGAGCAGACGAGGGAGGCGGAACAAGTGAAGTAGCGGTGA  
AATGCATAGATATCACTTGGAAACCCGATAGCGAAGGCGACTTCCAGGCTCGATCTGACGCTGATGCGCGAGAGCGTGG  
GTAGC

>ASV:1400:Genus:Ruminococcaceae\_UCG-014

TACGTAGGGAGCAAGCGTTATCCGGATTTATTGGGTGTAAGGGTGCCTAGACGGGAAGACAAGTTGGTTGTGAAAGCC  
TCGGCTCAACTGAGGAACTGCAACCAAACCTATCTTCTGAGTGCGGGAGAGGAAAGTGAATTCCTAGTGTAGCGGTG  
AAATGCGTAGATATTAGGAGGAACACCAGTGGCGAAGGCGACTTCTGGACCGTAAGTACGCTTGGAGCACGAAAGTGTG  
GGGAG

>ASV:1401:Genus:Ruminococcaceae\_UCG-010

TACGTAGGTGGCGAGCGTTATCCGGATTTATTGGGTGTAAGGGTGCCTAGGCGGGTGTAAAGTACAGTGTGAAATGCG  
GAGGCTCAACTCCGAACTGCATTTGAACTTACGATCTTGGAGTGGAGTAGAGGCAAGCGGAATTCCTAGTGTAGCGGTG  
AAATGCATAGATATCGGGAGGAACACCAGTGGCGAAGGCGGCTTCTGGGCTTTTACTGACGCTGAGGCGCAAAAGTGTG  
GGGAG

>ASV:1402:Genus:Butyricicoccus

TACGTAGGGAGCAAGCGTTATCCGGATTTACTGGGTATAAGGGGCGCGCAGGCGGGCGGCAAGTTGGAAGTGAATCCG  
GGGGCTTAAACCCCGAACTGCTTTCAAACCTGCTGGTCTTGGAGTGGAGAGGCGAGCGGAATTCCTAGTGTAGCGGTG  
AAATGCGTAGATATACGGAGGAACACCAGTGGCGAAGGCGGCTTCTGGACATTAAGTACGCTGAGGCGCGAAAGCGTG  
GGGAG

>ASV:1403:Family:Lachnospiraceae

TACGTATGGGGCAAGCGTTATCCGGATTTACTGGGCGTAAAGGGGAGCGTAGGCGGCATGGCAAGTACAGAAGTGAAGCCT  
GGGGCTCAACCCCGAATTGCTTTTGAACCTGTCAGGCTAGAGTGTCCGAGGGGTAAGCGGAATTCCTAGTGTAGCGGTG  
AAATGCGTAGATATTAGGAGGAACACCAGTGGCGAAGGCGGCTTACTGGACGATTACTGACGCTGAGGCTCGAAAGCGTG  
GGGAG

>ASV:1404:Genus:Fournierella

AACGTAGGTGGCAAGCGTTGTCCGGAATTACTGGGTGTAAGGGGAGCGCAGGCGGATTTGCAAGTTGGAAGTGAAACTCA  
TGGGCTCAACCCATGAACTGCTTTCAAACCTGAGATCTTGGAGTGGTAGAGGTAGGCGGAATTCCTAGTGTAGCGGTG  
GAATGCGTAGATATCGGGAGGAACACCAGTGGCGAAGGCGGCTTACTGGGCACTAACTGACGCTGAGGCTCGAAAGCATG  
GGTAG

>ASV:1405:Genus:Ruminococcaceae\_UCG-002

TACGTAGGTGGCAAGCGTTGTCCGGAATTACTGGGTGTAAGGGGCGTGTAGCGGGGAGGCAAGTTAGATGTGAAATCCA  
CGGGCTCAACTCGTGAAGTGCATTTGAACTACTCTTCTGAGTATCGGAGAGGCAATCGGAATTCCTAGTGTAGCGGTG  
AAATGCGTAGATATTAGGAGGAACACCAGTGGCGAAGGCGGATTGCTGGACGACAAGTACGCTGAGGCGCGAAAGCGTG  
GGGAG

>ASV:1406:Family:Lachnospiraceae

TACGTATGGGGCAAGCGTTATCCGGATTTACTGGGTGTAAGGGGAGCGTAGGCGGCATGGCAAGTACAGAAGTGAAGCCT  
GGGGCTCAACCCCGAATTGCTTTTGAACCTGTCAGGCTAGAGTGTCCGAGGGGTAAGCGGAATTCCTAGTGTAGCGGTG  
AAATGCGTAGATATTAGGAGGAACACCAGTGGCGAAGGCGGCTTACTGGACGATTACTGACGCTGAGGCTCGAAAGCGTG  
GGGAG

>ASV:1407:Genus:Faecalibacterium

AACGTAGGTGCAAGCGTTGTCCGGAATTACTGGGTGTAAGGGGAGCGCAGGCGGGCGATCAAGTTGGAAGTGAATCCA  
TGGGCTCAACCCATGAACTGCTTTCAAACCTGGTCTTGGAGTAGTGCAGAGGTAGGCGGAATTCCTAGTGTAGCGGTG  
GAATGCGTAGATATCGGGAGGAACACCAGTGGCGAAGGCGGCTTACTGGGCACTAACTGACGCTGAGGCTCGAAAGTGTG  
GGTAG

>ASV:1408:Genus:Lactobacillus

TACGTAGGTGGCAAGCGTTGTCCGGAATTTATTGGGCGTAAAGGGAACGAGGCGGCTTTTAAAGTCTGATGTGGAAGCCT  
TCGGCTTAAACGAAAGTGTGATTGGAACTGGAAGACTTGGAGTGCAGAAAGAGGAGGTGGAAGTCCATGTGTAGCGGTG  
AAATGCGTAGATATATTAGGAAGAACCAGTGGCGAAGGCGGCTTCTGGTCTGTAAGTACGCTGAGGCTCGAAAGCGTG  
GGTAG

>ASV:1409:Genus:Lachnospiraceae\_UCG-004

TACGTAGGGGGCAAGCGTTATCCGGATTTACTGGGTGTAAGGGGAGCGTAGACGGCGACGCAAGTCTGAAGTGAATACC



CGGGCTCAACCTGGAACTGCTTTGAAACTGTGTTGCTAGAGTGTGGAGAGGTAAGCGGAATTCCTAGTGTAGCGGTG  
AAATGCGTAGATATTAGGAAGAACCACAGTGGCGAAGGCGGCTTACTGGACAGTAACGACGTTGAGGCTCGAAAGCGTG  
GGGAG

>ASV:1410:Family:Lachnospiraceae

TACGTATGGTGAAGCGTTATCCGGATTTACTGGGTGTAAGGGAGCGTAGACGGATGGCAAGTCTGATGTGAAAACCC  
GGGGCTCAACCCGGGACTGCATTGAAACTGTTTCATCTAGAGTGTGGAGAGGTAAGTGAATTCCTAGTGTAGCGGTG  
AAATGCGTAGATATTAGAAGGAACCACAGTGGCGAAGGCGGCTTACTGGACAGTAACGACGTTGAGGCTCGAAAGCGTG  
GGGAG

>ASV:1411:Genus:Ruminococcaceae\_UCG-011

TACGTAGGTGGCGAGCGTTGTCCGGAATTACTGGGTGTAAGGGTGCCTAGGCGGCTTCTAAAGTCAGATGTGAAATACC  
GCAGCTCAACTGCGGGGCTGCATTTGAAACTTGGGAGCTTGAAGTAGAGGTAAGCGGAATTCCTAGTGTAGCGGTG  
GAATGCGTAGATATTAGGAGGAACCACAGTGGCGAAGGCGGCTTACTGGGCTTAACTGACGCTGAGGCACGAAAGCGTG  
GGGAG

>ASV:1412:Genus:Butyricimonas

CACGGGGGATGCGAGCGTTATCCGGATTTATTGGGTTAAAGGGCGCGTAGGCGGGACGACAAGTCAGCGGTAAAAGACT  
GCAGCTAAACTGTAGCACGCCGTTGAAACTGTTGACCTTGAGACGAGACGAGGGAGGCGGAACAAGTGAAGTAGCGGTGA  
AATGCATAGATACCTTGAACCCGATAGCGAAGGCAGCTTCCAGGCTCGATCTGACGCTGATGCGCGAGAGCGGTG  
GTAGC

>ASV:1413:Species:mucilaginoso

TACGTAGGGCGCGAGCGTTGTCCGGAATTATTGGGCGTAAAGAGCTTGTAGGCGGTTTGTGCGCTCTGCTGTGAAAGGCC  
GGGGCTTAACCCCGTGTATTGCAGTGGGTACGGGCAGACTAGAGTGCAGTAGGGGAGACTGGAATTCCTGGTGTAGCGGT  
GGAATGCGCAGATATCAGGAAGAACCAGATGGCGAAGGCAGGTCTCTGGGCTGTAACGACGCTGAGAAGCGAAAGCAT  
GGGGA

>ASV:1414:Genus:Subdoligranulum

AACGTAGGTGGCAAGCGTTGTCCGGAATTACTGGGTGTAAGGGAGCGCAGGCGGACCGGAAGTTGGAAGTGAATCTA  
TGGGCTCAACCCATAAATTGCTTTCAAACCTGCTGGCCTTGAAGTAGTGCAGAGGTAGGCGGAATTCCTGGTGTAGCGGTG  
GAATGCGTAGATATCGGGAGGAACCACAGTGGCGAAGGCGGCTTACTGGGCACCAACTGACGCTGAGGCTCGAAAGCATG  
GGTAG

>ASV:1415:Family:Lachnospiraceae

TACGTAGGGGGCAAGCGTTATCCGGATTTACTGGGTGTAAGGGAGCGTAGGTGGCAAGGCAAGTCAGATGTGAAAACCT  
GGGGCTCAACCCGGGACTGCATTTGAAACTGTCTAGCTAGAGTGCAGGAGAGGTAAGTGAATTCCTAGTGTAGCGGTG  
AAATGCATAGATATTAGGAGGAACCACAGTGGCGAAGGCGGCTTACTGGACTGTAACGACACTGAGGCTCGAAAGCGTG  
GGGAG

>ASV:1416:Species:moorei

TACGTAGGTGGCGAGCGTTATCCGGAATTATTGGGCGTAAAGGGTGCCTAGGCGGCCTGTAAGTAAGTGGTTAAATTGT  
TGGGCTCAACCCAATCCAGCCACTTAAACTGGCAGGCTAGAGTATTGGAGAGGCAAGTGAATTCATGTGTAGCGGTAA  
AATGCGTAGATATATGGAGGAACCACAGTGGCGAAGGCGGCTTCTAGCCAAAGACTGACGCTCATGCACGAAAGCGGTG  
GGAGC

>ASV:1417:Species:mucilaginoso

TACGTAGGGCGCGAGCGTTGTCCGGAATTATTGGGCGTAAAGAGCTTGTAGGCGGTTTGTGCGCTCTGCTGTGAAAGGCC  
GGGGCTTAACCCCGTGTATTGCAGTGGGTACGGGCAGACTAGAGTGCAGTAGGGGAGACTGGAATTCCTGGTGTAGCGGT  
GGAATGCGCAGATATCAGGAGGAACCAGATGGCGAAGGCAGGTCTCTGGGCTGTAACGACGCTGAGAAGCGAAAGCAT  
GGGGA

>ASV:1418:Genus:Ruminococcaceae\_UCG-013

TACGTAGGTGGCAAGCGTTGTCCGGAATTACTGGGTGTAAGGGGCGTGTAGGCGGGTTTTAAAGTCAGATGTGAAATCCC  
TCGGCTCAACTGAGGAACTGCATTTGAAACTGGAATCTTGAAGTCCGGAGAGGGAAGCGGAATTCCTAGTGTAGCGGTG  
AAATGCGTAGATATTAGGAGGAACCACAGTGGCGAAGGCGGCTTCTGGACGTAACGACGCTGAGGCGCGAAAGCGTG  
GGGAG

>ASV:1419:Family:Lachnospiraceae

TACGTATGGAGCAAGCGTTATCCGGATTTACTGGGTGTAAGGGAGCGTAGACGGCTTAGCAAGTCTGATGTGAAAGGCT  
GGGGCTCAACCCGGGACTGCATTGAAACTGTTAAGCTAGAGTCCGGAGAGGTAAGCGGAATTCCTAGTGTAGCGGTG  
AAATGCGTAGATATTAGGAGGAACCACAGTGGCGAAGGCGGCTTACTGGACGTAACGACGTTGAGGCTCGAAAGCGTG  
GGGAG

>ASV:1420:Genus:28-4

TACGTATGGAGCAAGCGTTATCCGGATTTACTGGGTGTAAGGGAGCGTAGACGGCAGGGCAAGTCTGATGTGAAAACCC  
GGGGCTCAACCCGGGACTGCATTGAAACTGTCCGGCTGGAGTGCAGGAGAGGTAAGTGAATTCCTAGTGTAGCGGTG  
AAATGCGTAGATATTAGGAGGAACCACAGTGGCGAAGGCGGCTTACTGGACTGTAACGACGTTGAGGCTCGAAAGCGTG  
GGGAG

>ASV:1421:Family:Lachnospiraceae

TACGTATGGAGCAAGCGTTATCCGGATTTACTGGGTGTAAGGGTGCCTAGGTGGCAGTGAAGTCAGATGTGAAAGGCC  
GGGGCTCAACCCGGGACTGCATTTGAAACTGCATAGCTAGAGTACAGGAGAGGCAAGTGAATTCCTAGTGTAGCGGTG  
AAATGCGTAGATATTAGGAGGAACCACAGTGGCGAAGGCGGCTTACTGGACTGTTACTGACACTGAGGCACGAAAGCGTG  
GGGAG

>ASV:1422:Genus:Sellimonas

TACGTAGGGGGCAAGCGTTATCCGATTTACTGGGTGTAAGGGAGCGTAGACGGCTGTGCAAGTCTGGAGTGAACCC  
GGGGCTCAACCCGGGATTGCTTTGAAACTGTGTAGCTGGAGTACCAGGAGAGGCAAGTGAATTCCTAGTGTAGCGGTG  
AAATGCGTAGATATTAGGAGGAACCACAGTGGCGAAGGCGGCTTCTGGACGTAACGACGTTGAGGCTCGAAAGCGTG  
GGGAG

>ASV:1423:Genus:Megasphaera  
TACGTAGGTGGCAAGCGTTGTCCGGAATTATTGGGCGTAAAGGGCGCGCAGGCGGCATCGCAAGTCGGTCTTAAAAGTGC  
GGGGCTTAACCCCGTAGGGGACCGAACTGTGAAGCTCGAGTGTCCGAGAGGAAAGCGGAATTCCTAGTGTAGCGGTG  
AATGCGTAGATATTAGGAGGAACACCAGTGGCGAAGGCGGCTTTCTGGACGACAACTGACGCTGAGGCGCAAAGCGAGG  
GGAGC

>ASV:1424:Genus:Ruminococcaceae\_UCG-010  
TACGTAGGTGGCAAGCGTTATCCGGATTTACTGGGTGTAAGGGTGTGTAGGCGGGAAGCAAGTCAGATGTGAAAATCA  
TGGGCTCAACCCATGACTGCTTTTAAAACCTGTTGAGCTAGAGTGTGGAGAGGTAATGGAATTCCTAGTGTAGCGGTG  
AAATGCGTAGATATCGGAGGAACACCAGTGGCGAAGGCGGTTTACTGGACCACAACTGACGCTGATACACGAAAGCGTG  
GGGAG

>ASV:1425:Family:Clostridiales\_vadinBB60\_group  
TACGTAGGTGGCGAGCGTTGTCCGGAATGACTGGGCGTAAAGGGAGCGTAGGCGGCACAACAAGTTAGGAGTGAATACC  
GTGGCTTAACCCATGACTGCTTTTAAAACCTGTTGAGCTAGAGTGTGGAGAGGAAAGCGGAATTCCTAGTGTAGCGGTG  
GAATGCGTAGATATTAGGAGGAACACCAGAGGCGAAGGCGGCTTTCTGGACATTAAGTACGCTGAGGCTCGAAAGCGTG  
GGGAG

>ASV:1426:Genus:Bacteroides  
TACGGAGGATCCGAGCGTTATCCGGATTTATTGGGTTTAAAGGGAGCGTAGATGGATGTTTAAAGTCAGTTGTGAAAGTTT  
GCGGCTCAACCGTAAAATTGCAGTTGATACTGGATCTTGGAGTGCAGTTGAGGCGAGCGGAATTCCTAGTGTAGCGGTG  
AAATGCTTAGATATCACGAAGAATCCGATTGCGAAGGCAGCTGCTAAGCCATTACTGACGCTGATGCACGAAAGCGTG  
GGGAT

>ASV:1427:Species:reticulotermitis  
TACGGAGGATCCAAGCGTTATCCGGATTTATTGGGTTTAAAGGGAGCGTAGGTGGAGGCTTAAAGTCAGTTGTGAAAGTTT  
GCGGCTCAACCGTAAAATTGCAGTTGATACTGGGTTTCTTGGAGTACAGTAGAGGTGGGCGGAATTCCTAGTGTAGCGGTG  
AAATGCTTAGATATCACGAAGAATCCAATTGCGAAGGCAGCTCACTAGACTGGCACTGACTGATGCTCGAAAGGTG  
GGTAT

>ASV:1428:Genus:Ruminiclostridium\_5  
TACGTAGGGAGCGAGCGTTGTCCGGATTTACTGGGTGTAAGGGTGCCTAGGCGGCAGAGCAAGTCAGGCGTGAAAGCCA  
TGGGCTTAACCCATGACTGCTTTGAAACTGTTCTTGGAGTGAAGTAGAGGCGAGCGGAATTCCTAGTGTAGCGGTG  
AAATGCGTAGAGATCGGAGGAACACCAGTGGCGAAGGCGGCTGCTGGGCTTAACTGACGCTGAGGCACGAAAGCATG  
GGTAG

>ASV:1429:Genus:Blautia  
TACGTAAGGGGCAAGCGTTATCCGGATTTACTGGGTGTAAGGGAGCGTAGACGGATGGACAAGTCTGATGTGAAAGGCG  
GGGGCCCAACCCCGGACTGCATTGGAAACTGCCGCTTGGAGTGCAGGAGAGGTAAGCGGAATTCCTAGTGTAGCGGTG  
AAATGCGTAGATATTAGGAGGAACACCAGTGGCGAAGGCGGCTTACTGGACGTAAGTACGCTTGGAGGCTCGAAAGCGTG  
GGGAG

>ASV:1430:Genus:Eisenbergiella  
TACGTAGGGGGCAAGCGTTATCCGGATTTACTGGGTGTAAGGGAGCGTAGACGGCATGGCAAGCCAGATGTGAAAACCC  
AGGGCTCAACCTTGGGATTGCATTTGAACTGTCAGGCTGGAGTGCAGGAGAGGTAAGCGGAATTCCTAGTGTAGCGGTG  
AAATGCGTAGATATTAGGAGGAACACCAGTGGCGAAGGCGGCTTACTGGACTGTAAGTACGCTTGGAGGCTCGAAAGCGTG  
GGGAG

>ASV:1431:Family:Ruminococcaceae  
TACGTAGGTGGCAAGCGTTGTCCGGAATTACTGGGTGTAAGGGAGCGCAGGCGGGAACAAGTCAGTGTGAAATCTA  
TGGGCTTAACCCATAAACTGCAGTTGAACTGTTTTTCTTGGAGTGAAGTAGAGGTTGGCGGAATTCCTAGTGTAGCGGTG  
AAATGCGTAGATATTCGGAGGAACACCAGTGGCGAAGGCGGCAACTGGGCTTTACTGACGCTGAGGCTCGAAAGGTG  
GGGAG

>ASV:1432:Species:baumannii/beijerinckii/calcoaceticus/dispersus/gyllenbergii/haemolyticus/  
junii/oryzae/parvus/tandooii/tjernbergiae  
TACAGAGGGTGCAGCGTTAATCCGATTTACTGGGCGTAAAGCGTGCCTAGGCGGCTGATTAAGTCGGATGTGAAATCCC  
TGAGCTTAACCTAGGAATTGCATTGATACTGGTCACTAGAGTATGGGAGAGGATGTTAGAATTCAGGTGTAGCGGTG  
AAATGCGTAGAGATCTGGAGGAATACCGATGGCGAAGGCAGCCATCTGGCTAATACTGACGCTGAGGTACGAAAGCATG  
GGGAG

>ASV:1433:Species:anthropi/cambriense  
TACGTAGGGCGCGAGCGTTGTCCGGAATTATTGGGCGTAAAGGGCTTGTAGGTGGCTGGTTGCGTCTGTGCGTAAAGCTC  
ATGGCTTAACCTGTGGGTTTGCAGTGGGTACGGGCTGGCTTGGAGTGCAGTAGGGGAGGCTGGAATTCCTGGTGTAGCGGTG  
GAATGCGCAGATATCAGGAGGAATACCGTGGCGAAGGCGGCTTCTGGGCTGTTACTGACACTGAGGAGCGAAAGCATG  
GGGAG

>ASV:1434:Genus:Marvinbryantia  
TACGTAGGGGGCAAGCGTTATCCGGATTTACTGGGTGTAAGGGAGCGTAGACGGGACAGCAAGTCTGATGTGAAAGGCG  
GGGGCTCAACCCCGGACTGCATTGGAAACTGCTGGCTGGAGTACCAGGAGGGTAAGCGGAATTCCTAGTGTAGCGGTG  
AAATGCGTAGATATTAGGAGGAACACCAGTGGCGAAGGCGGCTTACTGGACGTAAGTACGCTTGGAGGCTCGAAAGCGTG  
GGGAG

>ASV:1435:Genus:Bacteroides  
TACGGAGGATCCGAGCGTTATCCGGATTTATTGGGTTTAAAGGGAGCGTAGATGGATGTTTAAAGTCAGTTGTGAAAGTTT  
GCGGCTCAACCGTAAAATTGCAGTTGATACTGGATGTCTTGGAGTGCAGTTGAGGCGAGCGGAATTCCTAGTGTAGCGGTG  
AAATGCTTAGATATCACGAAGAATCCGATTGCGAAGGCAGCTGCTAAGCCATGACTGACGCTGATGCACGAAAGCGTG  
GGGAT

>ASV:1436:Genus:Ruminococcaceae\_NK4A214\_group  
TACGTAGGTGGCAAGCGTTATCCGGATTTACTGGGTGTAAGGGCGCGTAGGCGGGGATGCAAGTCAGGTGTGAAATCTA

TGGGCTTAACCCATAAACTGCACTTGAACCTGTATCTCTTGAGTGTCTGGAGAGGTAGATGGAATTCCTAGTGTAGCGGTG  
AAATGCGTAGATATTAGGAGGAACACCAGTGGCGAAGGCGATCTACTGGACGATAACTGACGCTGAGGCGCAAAGCGTG  
GGGAG  
>ASV:1437:Genus:Ruminococcaceae\_UCG-002  
TACGTAGGTGGCAAGCGTTGTCCGGATTTACTGGGTGTAAAGGGCGTGCAGCCGGTCTGCAAGTCAGATGTGAAATCCA  
TGGGCTCAACCCATGAACTGCATTTGAAACTGTAGATCTTGAGTGTCTGGAGGGCAATCGGAATTCCTAGTGTAGCGGTG  
AAATGCGTAGATATTAGGAGGAACACCAGTGGCGAAGGCGGATTGCTGGACAATAACTGACGCTGAGGCGCAAAGTGTG  
GGGAG  
>ASV:1438:Species:acetatigenes  
TACGGAGGATCCGAGCGTTATCCGGATTTATTGGGTTAAAGGGTGCAGCGGCGCATGTTAAGTCGGCGGTGAAATTTT  
GCAGCTCAACTGTAAAAGAGCCTTCGAAACTGGCAAGCTTGAGTGTGGATGAAGTAGCGGAATTTGTGGTGTAGCGGTG  
AAATGCATAGATATCACAAGAACACCAGTTGCGCAGGCAGCTTACTAAACCATAACTGACGCTCATGCACGAAGGCGTG  
GGGAT  
>ASV:1439:Family:Lachnospiraceae  
TACGTATGGTGAAGCGTTATCCGGATTTACTGGGTGTAAAGGGAGCGTAGACGGATGGCAAGTCTGATGTGAAAACCC  
GGGGCTCAACCCCGGACTGCATTAGAACTGTTTACTAGAGTGTGGAGAGGTAAGTGGAAATTCCTAGTGTAGCGGTG  
AAATGCGTAGATATTAGGAGGAACACCAGTGGCGAAGGCGGCTTACTGGACAGTAACGACGCTGAGGCTCGAAAGCGTG  
GGGAG  
>ASV:1440:Species:pullicaecorum  
TACGTAGGGAGCAAGCGTTATCCGGATTTACTGGGTGTAAAGGGCGTGTAGGCGGGCTTGAAGTTGGAAGTGAATCTC  
GGGGCTTAACCCGAACTGCTTTCAAACCTGCGAGTCTTGAGTGTGGAGAGGCGAGCGGAATTCCTAGTGTAGCGGTG  
AAATGCGTAGATATTGGGAGGAACACCAGTGGCGAAGGCGGCTGCTGGACATTAACGACGCTGAGGCGCAAAGCGTG  
GGGAG  
>ASV:1441:Genus:Lachnospiraceae\_AC2044\_group  
TACGTAGGGGGCAAGCGTTATCCGGATTTACTGGGTGTAAAGGGAGCGTAGACGGCATGGCAAGTCTGAAGTGAATGCG  
GGGGCTCAACCCCTGAACTGCTTTGAAACTGTCAGGCTGGAGTGCAGGAGAGGTAAGTGGAAATTCCTAGTGTAGCGGTG  
AAATGCGTAGATATTAGGAGGAACACCAGTGGCGAAGGCGGCTTACTGGACTGTAACGACGCTGAGGCTCGAAAGCGTG  
GGGAG  
>ASV:1442:Genus:Lachnoclostridium  
TACGTAGGGGGCAAGCGTTATCCGGATTTACTGGGTGTAAAGGGAGCGTAGATGGTAAAGCAAGTCTGAAGTGAAGCCC  
GGGGCTCAACCCCGGACTGCTTTGAAACTGTTAACTAGAGTGTGGAGAGGTAAGCGGAATTCCTAGTGTAGCGGTG  
AAATGCGTAGATATTAGGAGGAACACCAGTGGCGAAGGCGGCTTACTGGACAGTAACGACGCTGAGGCTCGAAAGCGTG  
GGGAG  
>ASV:1443:Genus:Ruminococcaceae\_UCG-002  
TACGTAGGTGGCAAGCGTTGTCCGGATTTACTGGGTGTAAAGGGCGTGCAGCCGGTCTGCAAGTCAGATGTGAAATCCA  
TGGGCTCAACCCATGAACTGCATTTGAAACTGTAGATCTTGAGTGTCTGGAGGGCAATCGGAATTCCTAGTGTAGCGGTG  
AAATGCGTAGATATTAGGAGGAACACCAGTGGCGAAGGCGGATTGCTGGACGATAACTGACGCTGAGGCGCAAAGTGTG  
GGGAG  
>ASV:1444:Genus:Acinetobacter  
TACAGAGGGTGCAGCGTTAATCCGGATTTACTGGGCGTAAAGCGTGCCTAGGCGGCTTTTTAAGTCGGATGTGAAATCCC  
CGAGCTTAACTTGGGAATTGCATTGATACTGGGAAGCTAGAGTATGGGAGAGGATGGTAGAATTCAGGTGTGGCGGTG  
AAATGCGTAGATCTGGAGGAATACCGATGGCGAAGGCGCCATCTGGCCTAATACTGACGCTGAGGTACGAAAGCATG  
GGGAG  
>ASV:1445:Genus:Ruminococcaceae\_UCG-014  
TACGTAGGGAGCAAGCGTTATCCGGATTTATTGGGTGTAAAGGGTGCCTAGACGGGAAATTAAGTTAGTTGTGAAATCCC  
TCGGCTTAACTGAGGAACTGCAACTAAAACCTGGTTTTCTTGAGTGTGGAGAGGAAAGTGGAAATTCCTAGTGTAGCGGTG  
AAATGCGTAGATATTAGGAGGAACACCAGTGGCGAAGGCGACTTTCTGGACAATAACTGACGCTGAGGCGCAAAGTGTG  
GGGAG  
>ASV:1446:Genus:Negativibacillus  
TACGTAGGTGGCAAGCGTTGTCCGGAACTACTGGGTGTAAAGGGAGCGTAGGCGGGGAGGCAAGTTGAATGTTAAACTA  
TCGGCTCAACTGATAGTCCGTTCAAACCTGCCACTCTTGAGTGCAGTAGAGGTAGGCGGAATTCCTAGTGTAGCGGTG  
AATGCGTAGATATTAGGAGGAACACCAGTGGCGAAGGCGGCTTACTGGCTGTAACGACGCTGAGGCTCGAAAGCGTGG  
GTAGC  
>ASV:1447:Genus:Butyricimonas  
TACGGGGGATGCGAGCGTTATCCGGATTTATTGGGTTAAAGGGCGCGTAGGCGGGACGGCAAGTCAGCGGTAAAAGACT  
GCAGCTAAACTGTAGCACCGGTTGAAACTGTTGACTCGAGACGAGACGAGGGAGGCGGAACAAGTGAAGTAGCGGTGA  
AATGCATAGATACACTTGGAAACCCGATAGCGAAGGCGAGTTCAGGCTCGGCTGACGCTGATGCGCGAGAGCGTGG  
GTAGC  
>ASV:1448:Species:tanakaei  
TACGTAGGGGGCGAGCGTTATCCGGATTCATTGGGCGTAAAGCGCGCGTAGGCGGCCGCTAGGCGGGGGTCAAATCCC  
GGGGCTCAACCCCGTCCGCCCCGAAACCCGCGGCTCGGTTCCGGTAGGGAGGGTGGAAATTCCTAGTGTAGCGGTG  
AATGCGCAGATATCGGAGGAACACCAGTGGCGAAGGCGGCCCTCTGGCCGAGACCGACGCTGAGGCGCAAAGTGTGG  
GGAGC  
>ASV:1449:Genus:Butyricicoccus  
TACGTAGGGAGCAAGCGTTATCCGGATTTACTGGGTGTAAAGGGCGCGCAGGCGGGCCGTAAGTTGGAAGTGAATCTA  
TGGGCTTAACCCATAAACTGCTTTCAAACCTGTTGGTCTTGAGTGTGGAGAGGCGAGCGGAATTCCTGTGTAGCGGTG  
AAATGCGTAGATATACGGAGGAACACCAGTGGCGAAGGCGGCTGCTGGACATTAACGACGCTGAGGCGCAAAGCGTG  
GGGAG

>ASV:1450:Genus:Staphylococcus  
TACGTAGGTGGCAAGCGTTATCCGGAATTATTGGGCGTAAAGCGCGTAGGCGGTTTTTAAAGTCTGATGTGAAAACCC  
ACGGCTCAACCGTGGAGGTCATTGAAACTGGAAACTTGAGTGCAGAAGAGGAAAGTGAATTCCATGTGTAGCGGTG  
AAATGCGCAGAGATATTGGAGGAACAGCAGTGGCGAAGGCGACTTTCTGGTCTGTAAC TGACGCTGATGTGCGAAAGCGTG  
GGAT

>ASV:1451:Genus:Coprococcus\_3  
TACGTATGGTGAAGCGTTATCCGGATTTACTGGGTGTAAAGGGAGCGTAGACGGCTGTGTAAGTCTGAAGTGAAAACCC  
GGGGCTCAACCCGGGACTGCTTTGGAACTATGCAGCTAGAGTGTGGAGAGGTAAGTGAATTCCAGTGTAGCGGTG  
AAATGCGTAGATATTGGAGGAACACCACTGAGTGGCGAAGGCGGCTTACTGGACGATGACTGACGTTGAGGCTCGAAAGCGTG  
GGAG

>ASV:1452:Family:Family\_XIII  
TACGTAGGGGGCAAGCGTTATCCGGAATTATTGGGCGTAAAGAGTGCCTAGGTGGTTACCTAAGCGCAGGGTATAAGGCA  
ATGGCTCAACCCGCTTTCGCTGCAACTGGGCTACTTGTAGTGCAGGAGAGGAAAGCGGAATTCCTAGTGTAGCGGTGA  
AATGCGTAGATATTAGGAGGAACACCACTGAGTGGCGAAGGCGGCTTTCTGGACTGTAAC TGACACTGAGGCACGAAAGCGTG  
GGAG

>ASV:1453:Genus:CAG-56  
TACGTAGGGGGCAAGCGTTATCCGGAATTACTGGGTGTAAAGGGAGCGTAGACGGCGAGGCAAGTCTGATGTGAAAACCC  
GGGGCTCAACCCGGGACTGCTTTGGAACTGTTTTACTTGTAGTACC GGAGAGGTAAGCGGAATTCCTAGTGTAGCGGTG  
AAATGCGTAGATATTAGGAGGAACACCACTGAGTGGCGAAGGCGGCTTACTGGACGTAAC TGACGTTGAGGCTCGAAAGCGTG  
GGAG

>ASV:1454:Species:massiliensis  
TACGTAGGGGGCGAGCGTTGTTCGGAATTATTGGGCGTAAAGGGTACGTAGGCGGCTCGTTAAGTTGGCGTTAAATCC  
GGGGCTCAACCCGGCAAGCGTTGAAACTGGCGAGCTTGTAGTGTAGAGGGGACAGTGAATTCCCTAGTGTAGCGGTGA  
AATGCGTAGAGATTAGGAAGAATACCGGTGGCGAAGGCGACTGTCTGGATACATACTGACGCTGAGGTACGAAAGCGTG  
GGAG

>ASV:1455:Genus:Flavobacterium  
TACGGAGGATCCAAGCGTTATCCGGAATCATTGGGTTTAAAGGGTCCGTAGGCGGCTTAATAAGTCAGCGGTGAAAGTTT  
TTGGCTTAACCCGAAATTCCTGACTGTTAGCTTGAATTTTTGTGAAGTAAC TAGAATATGTAGTGTAGCGGTG  
AAATGCTTAGATATTACATGGAATACCAATTGCGAAGGCGGTTACTAACAAACGATTGACGCTGATGGACGAAAGCGTG  
GGTAG

>ASV:1456:Family:Promicromonosporaceae  
TACGTAGGGTGCAAGCGTTGTCCGGAATTATTGGGCGTAAAGAGCTCGTAGGCGGCTGTGTCGCTCTGGTGTGAAAACCT  
GAGGCTCAACCTTAAGCCTGCATCGGGTACGGGCAGACTAGAGTACTGTAGGGGAGACTGGAATTCCTGGTGTAGCGGTG  
GAATGCGCAGATATCAGGAGGAACACCGATGGCGAAGGCGGCTTCTGGCAGTTACTGACGCTGAGGAGCGAAAGCATG  
GGAG

>ASV:1457:Species:biformis  
TACGTAGGTGGCGAGCGTTATCCGGAATGATTGGGCGTAAAGGGTGCCTAGGTGGCAGAACAAGTCTGGAGTAAAAGGTA  
TGGGCTCAACCCGACTTGGCTCTGGAACCTGTTAGTGTAGAGAACAGAGAGGACGGCGGAATTCCTAGTGTAGCGGTAA  
AATGCGTAGATATATGGAAGAACACCGGTGGCGAAGGCGGCTTCTGGTCTGTTGCTGACACTGAAGCACGAAAGCGTG  
GGAG

>ASV:1458:Genus:Dialister  
TACGTAGGTGGCAAGCGTTGTCCGGAATTATTGGGCGTAAAGCGCGCAGGCGGCTTCCCAAGTCCCTCTTAAAAGTGC  
GGGGCTTAACCCGCTGATGGGAAGGAACTGGGAAGCTGGAGTATCGGAGAGGAAAGTGAATTCCCTAGTGTAGCGGTGA  
AATGCGTAGATATTAGGAAGAACACCACTGAGTGGCGAAGGCGGCTTCTGGACGACAAC TGACGCTGAGGCGCGAAAGCCAGG  
GGAG

>ASV:1459:Genus:Ruminiclostridium\_5  
TACGTAGGGAGCAAGCGTTGTCCGGAATTACTGGGTGTAAAGGGTGCCTAGGCGGATCTGCAAGTCAAGCGGTGAAATCCA  
TGGGCTTAACCCATGAACTGCCTGAAACTGTGGGTCTTGTAGTGAAGTGTAGGAGGAGGCGGAATTCCTGGTGTAGCGGTG  
AAATGCGTAGAGATCGGGAGGAACACCACTGAGTGGCGAAGGCGGCTTACTGGGCTTAACTGACGCTGAGGCACGAAAGTGTG  
GGTAG

>ASV:1460:Family:Lachnospiraceae  
TACGTATGGTGAAGCGTTATCCGGAATTTACTGGGTGTAAAGGGAGCGTAGACGGATGGGCAAGTCTGATGTGAAAACCC  
GGGGCTCAACCCGGGACTGCATTGGAACCTGTTATCTAGAGTGTGGAGAGGTAAGTGAATTCCCTAGTGTAGCGGTG  
AAATGCGTAGATATTAGGAGGAACACCACTGAGTGGCGAAGGCGGCTTACTGGACGTAAC TGACGTTGAGGTTGAAAGCGTG  
GGAG

>ASV:1461:Family:Christensenellaceae  
TACGTAGGGAGCGAGCGTTGTCCGGAATTACTGGGCGTAAAGGGTGCCTAGGCGGTTTTTAAAGTCAAGTGTGAAATACC  
CGTGCTCAACATGGGGGTGCATCTGATACTGGAAGACTTGAGTGCAGGAGAGGAAAGCGGAATTCCTAGTGTAGCGGTG  
AAATGCGTAGATATTAGGAGGAACACCACTGAGTGGCGAAGGCGGCTTCTGGACTGTAAC TGACGCTGAGGCACGAAAGCGTG  
GGTAG

>ASV:1462:Genus:Bacteroides  
TACGGAGGATCCGAGCGTTATCCGGAATTTATTGGGTTTAAAGGGAGCGTAGATGGATGTTTAAAGTCAAGTGTGAAAGTTT  
GCGGCTCAACCGTAAAATTGCAGTTGATACTGGATATCTTGTAGTGCAGTTGAGGCGAGGCGGAATTCCTGGTATAGCGGTG  
AAATGCTTAGATATACGAAGAACCTCGATTGCGAAGGCGAGCTGCTAAGCTGCAACTGACATTGAGGCTCGAAAGTGTG  
GGTAT

>ASV:1463:Family:Lachnospiraceae  
TACGTATGGAGCAAGCGTTATCCGGAATTTACTGGGTGTAAAGGGTGCCTAGGTGGCAGTGAAGTCAAGTCAAGTGTGAAAGGCC  
GGGGCTCAACCCGGGACTGCATTGAAACTGCATAGCTAGAGTACAGGAGAGGCGGCGGAATTCCTAGTGTAGCGGTG

AAATGCGTAGATATTAGGAGGAACACCAGTGGCGAAGGCAGCCTGCTGGACTGTTACTGACACTGAGGCACGAAAGCGTG  
GGAG  
>ASV:1464:Genus:Bacteroides  
TACGGAGGATCCGAGCGTTATCCGGATTTACTGGGTGTAAGGGAGCGTAGGTGGATTGTTAAGTCAGTTGTGAAAGTTT  
GCGGCTCAACCGTAAAATTGCAGTTGAAACTGGGAGTCTTGAGTACAGTAGAGGTGGCGGAATTCGTGGTGTAGCGGTG  
AAATGCTTAGATATACGAAGAACTCCGATTGCGAAGGCAGCCTGCCAAGCCATGACTGACGCTGATGCACGAAAGCGTG  
GGAT  
>ASV:1465:Genus:Lachnoclostridium  
TACGTAGGGGGCAAGCGTTATCCGGATTTACTGGGTGTAAGGGAGCGTAGACGGCGAAGCAAGTCTGAAGTAAAACCC  
GGGGCTCAACCTGGGACTGCTTTGAAAAGTGTCTTGGCTAGAGTGTCCGAGAGGTAAGTGAATTCCTAGTGTAGCGGTG  
AAATGCGTAGATATTAGGAGGAACACCAGTGGCGAAGGCAGCCTACTGGACGATAACTGACGTTGAGGCTCGAAAGCGTG  
GGAG  
>ASV:1466:Genus:Ruminococcaceae\_UCG-005  
TACGTAGGTTGCGAGCGTTGTCGGATTTACTGGGTGTAAGGGAGCGTAGGCGGAGATGCAAGTTGGGAGTGAATCCA  
TGGGCTCAACCCATGAACTGCTTTCAAAGTGTATCCCTTGAGTGTCCGAGAGGCAAGCGGAATTCCTAGTGTAGCGGTG  
AAATGCGTAGATATTAGGAGGAACACCAGTGGCGAAGGCAGCCTGCTGGACGATAACTGACGCTGAGGCGCGAAAGCGTG  
GGAG  
>ASV:1467:Family:Rhodobacteraceae  
TACGGAGGGGGCTAGCGTTGTTCCGAATTTACTGGGCGTAAAGCGCACGTAGGCGGATCGGAAAGTTGGGGGTGAAATCCC  
GGGGCTCAACCTCGGAACTGCCTCAAAGTATCCGCTTGAGTTCGAGAGAGGTGAGTGAATTCAGTGTAGAGGTG  
AAATTCGTAGATATTGCGAGGAACACCAGTGGCGAAGGCAGCCTACTGGCTCGATACTGACGCTGAGGTGCGAAAGCGTG  
GGAG  
>ASV:1468:Species:bivia  
TACGGAAGGTTCCGGCGTTATCCGGATTTATTGGGTGTAAGGGAGCGTAGGCCGTTTGGTAAGCGTGTGTGAAATGTA  
GTAGCTCAACTTCTAGATTGCAGCGCAACTGTCAGACTTGAGTGCACAACTAGGCGGAATTCATGGTGTAGCGGTG  
AAATGCTTAGATATCATGAAGAACTCCGATTGCGAAGGCAGCTTACGGGAGCGCAACTGACGCTGAAGCTCGAAGGTGCG  
GGTAT  
>ASV:1469:Genus:Fusicatenibacter  
TACGTAGGGGGCAAGCGTTATCCGGATTTACTGGGTGTAAGGGAGCGTAGACGGCAAGACAAGTCTGATGTGAAAACCC  
AGGGCTTAACCTGGGACTGCATTGAAAAGTGTCTGGCTCGAGTGCAGGAGGTAAGCGGAATTCCTAGTGTAGCGGTG  
AAATGCGTAGATATTAGGAAGAACACCAGTGGCGAAGGCAGCCTACTGGACGTAAGTACGCTTGAAGCTCGAAAGCGTG  
GGAG  
>ASV:1470:Order:Gastranaerophilales  
TACGGAGGGTGAAGCGTTGTCGGAAATCATTGGGCGTAAAGAGTTCGTAGGTGGCATGTAAGTCTGGTGTAAAGGCA  
GAAGCTCAACTTCTGTAGGGCACTGGATACTTGAAGCTGGAATGCGGTAGAGGTAAGGGGAATTCCTGGTGTAGCGGTG  
AAATGCGTAGATATCAGGAGGAACATCCGTTGGCGTAAGCGCTTACTGGGCCGTAATTGACACTGAGGAACGAAAGCCGG  
GGTAG  
>ASV:1471:Family:Christensenellaceae  
TACGTAGGGAGCGAGCGTTGTCGGAAATTTACTGGGCGTAAAGGGTGCCTAGGCGGCGCAGTTAGTCAAGTGAATATC  
GGGGCTTAACCTCCGGACTGCTTCTGATACTGCTGTGCTCGAGTGCAGGAGAGGTAAGTGAATTCCTAGTGTAGCGGTG  
AAATGCGTAGATATTAGGAGGAACACCAGTGGCGAAGGCAGCCTACTGGACTGTAAGTACGCTGAGGCACGAAAGCGTG  
GGTAG  
>ASV:1472:Genus:Ruminococcaceae\_UCG-014  
TACGTAGGGAGCGAGCGTTATCCGGATTTATTGGGTGTAAGGGTGCCTAGACGGGAAATTAAGTTAGTTGTGAAATCCC  
TCGGCTTAACCTGAGGAACTGCAACTAAAAGTGGTTTTCTTGAGTGTGGAGAGGAAAGTGAATTCCTAGTGTAGCGGTG  
AAATGCGTAGATATTAGGAGGAACACCAGTGGCGAAGGCAGCCTTCTGGACAGTAAGTACGCTTGAAGCACGAAAGGTG  
GGAG  
>ASV:1473:Order:Mollicutes\_RF39  
TACGTAGGTGGCGAGCGTTATCCGGATTTATTGGGCGTAAAGCGTCCGAGCCGGTTTATTAAGTATAGAATTAAGCCT  
GAGGCTTAACCTCAGTTCGTTCTATAAACTGATAAGCTAGAGTGTGGTAGAGGCAAGTGAATTCCTAGTGTAGCGGTG  
AATGCGTAGATATTAGAAGGAACACCAGTGGCGAAGGCAGCCTGCTGGGCCACCACTGACGCTCAGGGACGAAAGCGTG  
GGAG  
>ASV:1474:Genus:Ruminococcaceae\_UCG-013  
TACGTAGGTGACAAGCGTTGTCGGATTTACTGGGTGTAAGGGCGCGTAGGCGGACTGTCAAGTCAGTCTGAAATACC  
GGGGCTTAACCTCGGGGCTGCGATTGAAACTGACAGCCTTGAGTATCGGAGAGGAAAGCGGAATTCCTAGTGTAGCGGTG  
AAATGCGTAGATATTAGGAGGAACACCAGTGGCGAAGGCAGCCTTCTGGACGACAAGTACGCTGAGGCGCGAAAGGTG  
GGAG  
>ASV:1475:Genus:Marvinbryantia  
TACGTAGGGGGCAAGCGTTATCCGGATTTACTGGGTGTAAGGGAGCGTAGACGGCAAGGCAAGTCTGATGTGAAAGGCT  
GGGGCTCAACCCGGGACTGCATTGAAAAGTGTCTGCTGGAGTGCAGGAGAGGTAAGCGGAATTCCTAGTGTAGCGGTG  
AAATGCGTAGATATTAGGAGGAACACCAGTGGCGAAGGCAGCCTACTGGACGTAAGTACGCTTGAAGCTCGAAAGCGTG  
GGAG  
>ASV:1476:Family:Ruminococcaceae  
TACGTAGGTGCAAGCGTTGTCGGATTTACTGGGTGTAAGGGCGCGTAGGCGGTTAGGCAAGTCAAGTGTGAAATACC  
GGGGCTTAACCTCGGGGCTGCAATTTGAAAAGTGTCTTCTTGAGTATCGGAGAGGCAGGCGGAATTCCTAGTGTAGCGGTG  
AAATGCGTAGATATTAGGAGGAACACCAGTGGCGAAGGCAGCCTGCTGGACGACAAGTACGCTGAGGCGCGAAAGCGTG  
GGAG  
>ASV:1477:Family:Bacillaceae

TACGTAGGTGGCAAGCGTTGTCCGGAATTATTGGGCGTAAAGCGCGCAGGCGGTCTTTAAGTCTGATGTGAAAGCCC  
CCGGCTCAACCCGGGAGGGTATTGAAAAGCTGGGAGACTTGAGTACAGAAAGAGGAGTGAATTCACGTGTAGCGGTG  
AAATGCGTAGATATTGGAGGAACACCAGTGGCGAAGGCGACTCTCTGGTCTGTAACGACGCTGAGGCGCAAAGCGTG  
GGGAG

>ASV:1478:Genus:Lachnoclostridium

TACGTAGGGGGCAAGCGTTATCCGGATTTACTGGGTGTAAGGGAGCGTAGACGGTAAAGCAAGTCTGAAGTAAAGCCC  
GGGGCTCAACTCCGGGACTGCTTTGAAAAGCTGTTAACTAGAGTGTGGAGAGGTAAGCGGAATTCCTAGTGTAGCGGTG  
AAATGCGTAGATATTAGGAGGAACACCAGTGGCGAAGGCGGCTTACTGGACAGTAACGACGTTGAGGCTCGAAAGCGTG  
GGGAG

>ASV:1479:Genus:Lachnoclostridium

TACGTAGGGGGCAAGCGTTATCCGGATTTACTGGGTGTAAGGGAGCGTAGACGGCAGGGCAAGTCTGGAGTAAAGCCC  
GGGGCTCAACCCGGGACTGCTTTGAAAAGCTGCCATGCTAGAGTGTGGAGAGGCAAGTGAATTCCTAGTGTAGCGGTG  
AAATGCGTAGATATTAGGAGGAACACCAGTGGCGAAGGCGGCTTCTGGACGATGACTGACGTTGAGGCTCGAAAGCGTG  
GGGAG

>ASV:1480:Genus:Lachnoclostridium

TACGTAGGGGGCAAGCGTTATCCGGATTTACTGGGTGTAAGGGAGCGTAGACGGCAGCAAGTCTGAAGTAAAACCC  
AGGGCTCAACCTGGGACTGCTTTGAAAAGCTGTTTGTAGAGTGTGGAGAGGTAAGTGAATTCCTAGTGTAGCGGTG  
AAATGCGTAGATATTAGGAGGAACACCAGTGGCGAAGGCGGCTTACTGGACGATAACTGACGTTGAGGCTCGAAAGCGTG  
GGGAG

>ASV:1481:Genus:Anaerostipes

TACGTAGGGGGCAAGCGTTATCCGGAATTACTGGGTGTAAGGGTGCCTAGGTGGTATGGCAAGTCAAGTAAAACCC  
AGGGCTTAACCTGGGACTGCTTTGAGACTGTCAGACTGGAGTGCAGGAGAGGTAAGCGGAATTCCTAGTGTAGCGGTG  
AAATGCGTAGATATTAGGAGGAACATCAGTGGCGAAGGCGGCTTACTGGACTGAAACTGACACTGAGGCACGAAAGCGTG  
GGGAG

>ASV:1482:Genus:Ruminiclostridium\_1

TACGTAGGTGGCAAGCGTTGTCCGATTTACTGGGTGTAAGGGCGTGTAGGCGGGTCAGCAAGTCAAGTGTAAATCCC  
GGGGCTTAACCCGGAAGTGCATCTGAAACTGTTGATCTTGGAGTGTGGAGAGGAAAGTGAATTCCTAGTGTAGCGGTG  
AAATGCATAGAGATTAGGAGGAACACCAGTGGCGAAGGCGGCTTCTGGACAGTAACGACGCTGAGGCGCAAAGCGTG  
GGGAG

>ASV:1483:Genus:Lachnoclostridium

TACGTAGGGGGCAAGCGTTATCCGGATTTACTGGGTGTAAGGGAGCGTAGACGGCATGGCAAGTCTGAAGTAAAGCCC  
GGGGCTCAACCCGGGACTGCTTTGAAAAGCTGCAGGCTAGAGTGTGGAGAGGCAAGTGAATTCCTAGTGTAGCGGTG  
AAATGCGTAGATATTAGGAGGAACACCAGTGGCGAAGGCGGCTTCTGGACGATGACTGACGTTGAGGCTCGAAAGCGTG  
GGGAG

>ASV:1484:Genus:Flavonifractor

TACGTAGGTGGCAAGCGTTATCCGGATTTACTGGGTGTAAGGGCGTGTAGGCGGGCTGGCAAGTCAAGTGTAAACCA  
TGGGCTCAACCCATGGCTGCATTTGAAAAGTGTGGTCTTGGAGTGTGGAGAGGCAATCGGAATTCCTGTGTAGCGGTG  
AAATGCGTAGATATTAGGAGGAACACCAGTGGCGAAGGCGGATTCTGGACAGTAACGACGCTGAGGCGCAAAGCGTG  
GGGAG

>ASV:1485:Genus:Lachnoclostridium

TACGTAGGGGGCAAGCGTTATCCGGATTTACTGGGTGTAAGGGAGCGTAGACGGCGGAGCAAGTCTGAAGTAAAGCCC  
GGGGCTCAACCCGGGACTGCTTTGAAAAGTGTGGTCTTGGAGTGTGGAGAGGTAAGTGAATTCCTAGTGTAGCGGTG  
AAATGCGTAGATATTAGGAGGAACACCAGTGGCGAAGGCGGCTTACTGGACAGTAACGACGTTGAGGCTCGAAAGCGTG  
GGGAG

>ASV:1486:Genus:Family\_XIII\_AD3011\_group

TACGTAGGGGGCGAGCGTTATCCGGAATTATTGGGCGTAAAGAGTGCCTAGGTGGTAACTTAAGCGCGAGGTTAAGGCA  
ATGGCTTAACCTATTGTTCCGCTGCATTTGAAAAGTGTGGTCTTGGAGTGTGGAGAGGTAAGTGAATTCCTAGTGTAGCGGTG  
AAATGCGTAGATATTAGGAGGAACACCAGTGGCGAAGGCGGCTTCTGGACTGAAACTGACACTGAGGCACGAAAGTGTGG  
GGAG

>ASV:1487:Genus:Ruminococcaceae\_NK4A214\_group

TACGTAGGTGGCAAGCGTTATCCGGATTTACTGGGTGTAAGGGCGCGTAGGCGGGATGCAAGTCAAGTCAAGTGTAAATCTA  
TGGGCTTAACCCATAAAGTGCATTTGAAAAGTGTATCTCTTGGAGTGTGGAGAGGTAAGTGAATTCCTTGTGTAGCGGTG  
AAATGCGTAGATATAAGGAAGAACACCAGTGGCGAAGGCGATCTACTGGACAGTAACGACGCTGAGGCGCAAAGCGTG  
GGGAG

>ASV:1488:Genus:Ruminococcaceae\_UCG-010

TACGTAGGTGGCAAGCGTTATCCGGATTTACTGGGTGTAAGGGTGTGTAGGCGGGACTGCAAGTCAAGTGTAAATCTA  
TGGGCTCAACTCATGACCTGCATTTGAAAAGTGTGGTCTTGGAGTGTGGAGAGGTAAGTGAATTCCTGGTGTAGCGGTG  
AAATGCGTAGATATTAGGAGGAACACCAGTGGCGAAGGCGGATTACTGGACGACACTGACGCTGAGACACGAAAGCGTG  
GGGAG

>ASV:1489:Species:naeslundii/oris/viscosus

TACGTAGGGCGGAGCGTTGTCCGGAATTATTGGGCGTAAAGAGCTCGTAGGCGGCTGGTCCGCTCTGTCTGAAATCTT  
CTGGCTTAACCTGGGGCTTGGGTTGGTACGGGCGGCTTGGAGTGTGGAGAGGTAAGTGAATTCCTGGTGTAGCGGTG  
GAATGCGCAGATATTAGGAAGAACACCAGTGGCGAAGGCGGCTTCTGGGCGTACTGACGCTGAGGAGCGAAAGCGTG  
GGGAG

>ASV:1490:Genus:Ezakiella

TACGTATGGAGCGAGCGTTGTCCGGAATTATTGGGCGTAAAGGGTGCAGGCGGCTTTACAAGTTGGATGTGAAATATT  
GTGGCTCAACCAACAACGTGCATCCAAAAGCTGCAAGCTTGGAGTAAAGGAGAGGTAAGTGAATTCCTGGTGTAGCGGTG  
GAATGCGTAGATATTAGGAGGAATACCAGTGGCGAAGGCGACTTACTGGACTTAAACTGACGCTCAGGCACGAAAGCGTG

GGGAG

>ASV:1491:Species:af fermentans/coyleae/fournierii/H-EH3/ihumii/mucifaciens/pilbarensis/ureicelerivorans

TACGTAGGGTGCGAGCGTTGTCCGGAATTAAGGCTGAGGTGGTTTTCGCGTCTTTGTGTAAGCCC  
GCAGCTTAACGCGGACTGCAGGCGATACGGGCATAACTGAGTGTGTAGGGGAGACTGGAATTCCTGGTGTAGCGGT  
GGAATGCGCAGATATCAGGAGGAACACCGATGGCGAAGGCAGGTCTCTGGGCAGTAAGTACGCTGAGGAGCGAAAGCAT  
GGTA

>ASV:1492:Genus:Dysgonomonas

TACGGAGGATGCGAGCGTTATCCGGATTTATTGGGTTTAAAGGGTGCAGGCGGGCTTTAAGTCAGCGGTGAAATCTC  
GACGCTTAACGTCGAAACTGCCGTTGAAACTGGGAGTCTTGTAGTATAGATGAAGTAGCGGAATTCGTTGTGTAGCGGTG  
ACATGCTTAGATATAACGAGGAACTCCGATTGCGTAGGCAGCTTACTAAGCTATAACTGACGCTCAAGCACGAAAGCGTG  
GGAT

>ASV:1493:Genus:Parabacteroides

TACGGAGGATGCGAGCGTTATCCGGATTTATTGGGTTTAAAGGGTGCAGGCGGGCTTTAAGTCAGCGGTGAAAGTTT  
GTGGCTTAACATAAAATTGCCGTTGAAACTGGGAACTTGTAGTGTGTTTGTAGGTCAGCGGAATGCGTGGTGTAGCGGTG  
AAATGCATAGATATCAGCAGAACTCCAATTGCGAAGGCAGCTTACTAAACCATAACTGACACTGAAGCACGAAAGCGTG  
GGAT

>ASV:1494:Genus:Shuttleworthia

TACGTATGGAGCAAGCGTTATCCGGATTTACTGGGTGTAAGGGGAGCGTAGGCGGGGGCAAGTCTGATGTGAAAACCC  
GGGGCTCAACCCGGGACTGCATTGAAACTGTCCTGCTAGAGTGTGCGAGGGGTAAGTGAATTCCTAGTGTAGCGGTG  
AAATGCGTAGATATTAGGAGGAACACCGGTGGCGAAGGCGGCTTACTGGACGACAACTGACGCTGAGGCTCGAAAGCGTG  
GGAG

>ASV:1495:Genus:Christensenellaceae\_R-7\_group

TACGTAGGGGGCGAGCGTTGTCCGGAATGATTGGGCGTAAAGGGGCGGTAGGCGGCCTGGTAAGTCTGAAGTAAAAGTCC  
CGCTTCAAGTGTGGAAATTGCTTTGATACTGCTGGGCTCGAGTGCAGGAGAGGAAAGCGGAATTCCTGGTGTAGCGGTG  
AAATGCGTAGATATCGGAGGAACACCCAGTGGCGAAGGCGGCTTCTGGACTGTAAGTACGCTGAGGCGCGAAAGCGTG  
GGAG

>ASV:1496:Genus:Porphyromonas

TACGGAGGATACGAGCGTTATCCGGAATTTATTGGGTTTAAAGGGTGCAGGCGGCTATTTAAGTCAGGGGTGAAAAGCA  
TGAGCTCAACTCATGCTTGCCTTTGAAACTGGACAGCTAGAGAAAAGACGAGGTATGTGGAATGTGTGGTGTAGCGGTG  
AAATGCATAGATATCACACAGAACTCCGATTGCGCAGGCAGCTACCAGACTTCTTCTGACACTGAAGCACGAAAGCGTG  
GGAT

>ASV:1497:Order:Clostridiales

TACGTAGGGGGCGAGCGTTGTCCGGAATCACTGGGCGTAAAGGGGCGGTAGGCGGCCGGTAAGTCAAGTGTGAAAAGTG  
AGGGCTCAACCCCTTAGAGTGCATCTGATACTGCTGGGCTTGTAGTACAGAAAGGAAAGCGGAATTCCTAGTGTAGCGGTG  
AAATGCGTAGATATTAGGAGGAACACCCAGTGGCGAAGGCGGCTTCTGGGCTGAAACTGACGCTGAGGCGCGAAAGCGTG  
GGAG

>ASV:1498:Genus:Agathobacter

TACGTATGGAGCAAGCGTTATCCGGAATTTACTGGGTGTAAGGGGAGCGTAGGCGGTCGCCAAGTCTGATGTGAAAAGGCC  
GGGGCTCAACCCGGGACTGCATTGAAACTGTAGGACTAGAGTGTGCGAGGGGTAAGTGAATTCCTAGTGTAGCGGTG  
AAATGCGTAGATATTAGGAGGAACACCCAGTGGCGAAGGCGGCTTACTGGACGACTACTGACGCTGAGGCTCGAAAGCGTG  
GGAG

>ASV:1499:Genus:Ruminiclostridium\_5

TACGTAGGGAGCAAGCGTTGTCCGGAATTTACTGGGTGTAAGGGTGCAGGCGGATTGGCAAGTCAAGTGAATCCA  
TGGGCTTAACCCATGAACTGCTTTTGAAGTGTAGTCTTGTAGTGAAGTAGAGGTAGGCGGAATTCCTGGTGTAGCGGTG  
AAATGCGTAGATATCGGAGGAACACCCAGTGGCGAAGGCGGCTTACTGGGCTTAACTGACGCTGAGGCGCGAAAGTGTG  
GGTAG

>ASV:1500:Genus:Pedobacter

TACGGAGGATCAAGCGTTATCCGGAATTTATTGGGTTTAAAGGGTGCAGGCGGCTGTTAAGTCAAGGTGAAAAGACG  
GTAGCTCAACTATCGCAGTGCCTTTGATACTGATGGGCTTGAATGGACTAGAGGTAGGCGGAATGAGACAAGTACGCGGTG  
AAATGCATAGATATGCTCAGAACACCGATTGCGAAGGAAGCTTACTATGGTTTTATTGACGCTGAGGCGCGAAAGCGTG  
GGAT

>ASV:1501:Genus:Faecalibacterium

AACGTAGGTCAACAAGCGTTGTCCGGAATTAAGGCTGTAAGGGGAGCGCAGGCGGGAAGACAAGTTGGAAGTGAATCTA  
TGGGCTCAACCCATAAACTGCTTTCAAAGTGTCTTCTTGTAGTGTGAGGAGGTAAGCGGAATTCCTGGTGTAGCGGTG  
GAATGCGTAGATATCGGAGGAACACCCAGTGGCGAAGGCGGCTTACTGGGCACCAACTGACGCTGAGGCTCGAAAGTGTG  
GGTAG

>ASV:1502:Genus:Enterococcus

TACGTAGGTGCAAGCGTTGTCCGGAATTTATTGGGCGTAAAGCGAGCGCAGGCGGCTTTTAAAGTCTGATGTGAAAAGCCC  
CCGGCTAACCAGGGGAGGCTATTGAAACTGGGAGACTTGTAGTGCAGAAAGGAAAGCGGAATTCATGTGTAGCGGTG  
AAATGCGTAGATATATGGAGGAACACCCAGTGGCGAAGGCGGCTTCTGGTCTGTAAGTACGCTGAGGCTCGAAAGCGTG  
GGAG

>ASV:1503:Family:Christensenellaceae

TACGTAGGGAGCAAGCGTTGTCCGGAATTTACTGGGCGTAAAGGGTGCAGGCGGCGAGTGTGAGTCAAGTGAATATC  
GGGGCTTAACCCGGGCTGCTTCTGATACTGCTGTGCTTGTAGTGCAGGAGAGGTAAGCGGAATTCCTAGTGTAGCGGTG  
AAATGCGTAGATATTAGGAGGAACACCCAGTGGCGAAGGCGGCTTACTGGACTGTAAGTACGCTGAGGCTCGAAAGCGTG  
GGTAG

>ASV:1504:Genus:Marvinbryantia

TACGTAGGGGGCAAGCGTTATCCGGATTTACTGGGTGTAAAGGGAGCGTAGACGGCCGTGCAAGTCTGATGTGAAAGGCT  
GGGGCTCAACCCCGGACTGCATTGAAAACCTGATGGCTGGAGTGCCGGAGAGGTAAGCGGAATTCCTAGTGTAGCGGTG  
AAATGCGTAGATATTAGGAGGAACACCAGTGGCGAAGGCGGCTTACTGGACGGTAACGACGTTGAGGCTCGAAAGCGTG  
GGGAG

>ASV:1505:Genus:Acinetobacter

TACAGAGGGTGCAGCGTTAATCCGGATTTACTGGGCGTAAAGCGTACGTAGGCGGCTAATTAAGTCCGATGTGAAATCCC  
CGAGCTCAACTTGGGAATTGCATTGATACTGGTTAGCTAGAGTATGGGAGAGGATGGTAGAATTCAGGTGTAGCGGTG  
AAATGCGTAGAGATCTGGAGGAATACCGATGGCGAAGGCAGCCATCTGGCCTAATACTGACGCTGAGGTACGAAAGCATG  
GGGAG

>ASV:1506:Genus:Fournierella

TACGTAGGTGGCAAGCGTTGTCCGGAATTTACTGGGTGTAAAGGGAGCGCAGGCGGGTTTCAAGTTGGATGTTAATCGA  
GGGGCTCAACCCCTTCCGATTCAAACCTGCAGATCTTGGTGGTGCAGAGGTAGGCGGAATTCCTGGTGTAGCGGTGG  
AATGCGTAGATATCGGGAGGAACACCAGTGGCGAAGGCGGCTTACTGGGCACTAACTGACGCTGAGGCTCGAAAGCATG  
GTAGC

>ASV:1507:Genus:Ruminococcaceae\_UCG-014

TACGTAGGGAGCGAGCGTTATCCGGAATTTACTGGGTGTAAAGGGTGCCTAGACGGGAGAGCAAGTTAGTTGTGAAATCCC  
TCGGCTTAACGTAGGAACTGCAACTAAAACACGATCTTGGTGGTGCAGGAGAGGTAAGTGAATTCCTAGTGTAGCGGTG  
AAATGCGTAGATATTAGGAGGAACACCAGTGGCGAAGGCGACTTACTGGACTGTAACGACGTTGAGGCACGAAAGTGTG  
GGGAG

>ASV:1508:Species:jeotgali

TACGAAGGGGGCTAGCGTTGCTCGGAATCACTGGGCGTAAAGGGCGCGTAGGCGGCCTGTAAAGTTGGGGGTGAAAGCCC  
GTGGCTCAACCACGGAATTGCCTTGCATAGCTTGGCTTGGTGGTGGTAGAGGTTGGTGGAACTGCGAGTGTAGAGGTG  
AAATTCGTAGATATTGCAAGAACACCAGTGGCGAAGGCGGCAACTGGACCATCACTGACGCTGAGGCGCGAAAGCGTG  
GGGAG

>ASV:1509:Genus:Christensenellaceae\_R-7\_group

TACGTAGGGGGCGAGCGTTGCTCGGAATGACTGGGCGTAAAGGGCGCGTAGGCGGCCGATTAAGTCTGGAGTAAATCCC  
CGCTTTAAGGTGGGAATTGCTTGGAGACTGGTGGCTTGGTGGTGCAGAAGAGGTAAGTGAATTCCTAGTGTAGCGGTG  
AAATGCGTAGAGATTGGGAGGAACACCAGTGGCGAAGGCGACTTACTGGGCTGTAACGACGCTGAGGCGCGAAAGCGTG  
GGGAG

>ASV:1510:Genus:Dorea

TACGTAGGGGGCAAGCGTTATCCGGATTTACTGGGTGTAAAGGGAGCGTAGACGGCACGGCAAGCCAGATGTGAAAGCCC  
GGGGCTCAACCCCGGACTGCATTTGAACTGCTGAGCTAGAGTGTGGAGAGGCAAGTGAATTCCTAGTGTAGCGGTG  
AAATGCGTAGATATTAGGAGGAATACCACTGGCGAAGGCGGCTTCTGGACAGTACTGACGTTGAGGCTCGAAAGCGTG  
GGGAG

>ASV:1511:Genus:Lachnoclostridium

TACGTAGGGGGCAAGCGTTATCCGGATTTACTGGGTGTAAAGGGAGCGCAGACGGCGATGCAAGTCTGGAGTAAAGCCC  
GGGGCTCAACCCCGGACTGCCTTGGAACTGTAGGCTAGAGTGTGGAGAGGCAAGCGGAATTCCTAGTGTAGCGGTG  
AAATGCGTAGATATTAGGAAGAACACCAGTGGCGAAGGCGGCTTCTGGACAGTAACTGACGTTGAGGCTCGAAAGCGTG  
GGGAG

>ASV:1512:Species:timonensis

TACGTAGGTGGCAAGCGTTATCCGGATTTACTGGGTGTAAAGGGCGTGTAGGCGGGAAGCAAGTCAAGTGTGAAAACCTA  
TGGGCTCAACCCATAGCCTGCATTTGAACTGTTTCTTGGTGTAGTGTGGAGAGGCAAGCGGAATTCCTGTGTAGCGGTG  
AAATGCGTAGATATACGAGGAACACCAGTGGCGAAGGCGGCTTCTGGACATTAACGACGCTGAGGCGCGAAAGCGTG  
GGGAG

>ASV:1513:Species:chungangensis/garvieae/laudensis/raffinolactis

TACGTAGGTCCCGAGCGTTGCTCGGATTTATTGGGCGTAAAGCGAGCGCAGGTGGTTAATAAGTCTGATGTAAAGGCA  
GTGGCTCAACCCATAGTGTGCAATTTGAACTGTTAGACTTGGTGGTGCAGTAGAGAGGAGTGAATTCATGTGTAGCGGTG  
AATGCGTAGATATACGAGGAACACCAGTGGCGAAGGCGGCTTCTGGACTGTACTGACACTGAGGCTCGAAAGCGGTG  
GTAGC

>ASV:1514:Family:Mitochondria

GACGGGGGGGCAAGTGTCTTCCGAAATGACTGGGCGTAAAGGGCACGTAGGCGGTGAATCGGGTTGAAAGTAAAGTCCG  
CCAAAAGTGGCGGAATGCTCTCGAAACCAATTCATTTGAGTGTAGACAGAGGAGAGTGAATTCCTGTGTAGGGGTGAA  
ATCCGTAGATCTACGAAGGAACGCCAAAAGCGAAGGCAGCTCTCTGGTCCCTACCGACGCTGGGGTGCAGAAAGCATGGG  
GAGCG

>ASV:1515:Genus:Alistipes

TACGGAGGATCCGAGCGTTATCCGGATTTATTGGGTTTAAAGGGTGCCTAGGCGGTGAGTTAAGTTAGAGTAAAGCTC  
GATGCTCAACATCGAACTGCCTGATACTGCTGACTAGAGTGTAGTTGGGAAAGCGGAATGTGTGGTGTAGCGGTG  
AAATGCTTAGATATCACACAGAACACCAGTGGCGAAGGCAGCTTTCCAAGCTATTACTGACGCTGAGGCACGAAAGCGTG  
GGGAG

>ASV:1516:Genus:Bacteroides

TACGGAGGATCCGAGCGTTATCCGGATTTATTGGGTTTAAAGGGAGCGTAGGTGGATTGTTAAGTCAAGTGTGAAAGTTT  
GCGGCTCAACCGTAAATGCAAGTTGAACTGGCAGTCTTGGTGTAGTGTAGGTTGGGCGGAATTCGTGGTGTAGCGGTG  
AAATGCTTAGATATCACGAAGAACCCGATTGCGAAGGCAGCTCACTAGAGTGAACGACACTGATGCTCGAAAGTGTG  
GGTAT

>ASV:1517:Family:Lachnospiraceae

TACGTATGGAGCAAGCGTTATCCGGATTTACTGGGTGTAAAGGGTGCCTAGGTGGCAGTGAAGTCAAGTCAAGTGTGAAAGGCC  
GGGGCTCAACCCCGGAGCTGCATTTGAACTGCATAGCTAGAGTACAGGAGAGGCAAGCGGAATTCCTAGTGTAGCGGTG  
AAATGCGTAGATATTAGGAGGAACACCAGTGGCGAAGGCGGCTTCTGGACTGTTACTGACACTGAGGCACGAAAGCGTG



GGGAG  
>ASV:1518:Genus:Lactobacillus  
TACGTAGGTGGCGAGCGTTGTCGGATTATTGGGCGTAAAGGGAACGCAGGCGGCTTTTAAAGTCTGATGTGAAAGCCT  
TCGGCTTAACCGAAGTAGTGCATTGGAACTGGAAGACTTGAGTGCAGAAGAGGAGGTGGAACCCATGTGTAGCGGTG  
AAATGCGTAGATATATGGAAGAACCACAGTGGCGAAAGCGGCTCTCTGGTCTGTAACGACGCTGAGGTTCAAAGCGTG  
GGTAG  
>ASV:1519:Family:Lachnospiraceae  
TACGTAGGGGGCAAGCGTTATCCGGATTACTGGGTGTAGAGGGAGCGTAGACGGCATGGCAAGCCAGATGTGAAAGCCC  
GGGGCTCAACCCCGGACTGCATTTGAACTGTGAGGCTAGAGTGTGCGAGAGGAAAGCGGAATTCCTAGTGTAGCGGTG  
AAATGCGTAGATATTAGGAGGAACACCAGTGGCGAAGGCGGCTTTCTGGACGATGACTGACGTTGAGGCTCAAAGCGTG  
GGGAG  
>ASV:1520:Genus:Staphylococcus  
TACGTAGGTGGCAAGCGTTATCCGGAATTATTGGGCGTAAAGCGCGCTAGGCGGTTTTTAAAGTCTGATGTGAAAGCCC  
ACGGCTCAACCGTGGAGGTCATTGGAACTGGAACACTTGAGTGCAGAAGAGGAAAGTGAATTCATGTGTAGCGGTG  
GAATGCGCAGAGATATGGAGGAACACCAGTGGCGAAGGCGACTTTCTGGTCTGTAACGACGCTGATGTGCGAAAGCGTG  
GGGAT  
>ASV:1521:Family:Bacillaceae  
TACGTAGGTGGCAAGCGTTATCCGGAATTATTGGGCGTAAAGCGCGCGCAGGCGGCTTCTTAAAGTCTGATGTGAAATCTC  
GGGGCTCAACCCGAGCGGCCATTGGAACTGGGAGCTTGAGTGCAGAAGAGGAGAGTGAATTCACGTTGAGCGGTG  
AAATGCGTAGATATGTGGAGGAACACCAGTGGCGAAGGCGACTCTCTGGTCTGTAACGACGCTGAGGCGCAAAGCGTG  
GGGAG  
>ASV:1522:Species:wadsworthensis  
TACGTAGGGTGGCAAGCGTTAATCCGGAATTACTGGGCGTAAAGCGTGCAGGCGGTTCTGTAAGATAGATGTGAAATCCC  
CGGGCTCAACCTGGGAATTGCATATATGACTGCAGAACTTGAGTTTGTGAGGAGGAGGTGGAATTCACGTTGAGCAGTG  
AAATGCGTAGATATGTGGAAGAACCAGTGGCGAAGGCGACTCTCTGGGACATGACTGACGCTCATGCACGAAAGCGTG  
GGGAG  
>ASV:1523:Genus:Christensenellaceae\_R-7\_group  
TACGTAGGGGGCAAGCGTTGTCGGGAATGATTGGGCGTAAAGGGCGCGTAGGCGGCTCGGTAAGTCTGGAGTAAAAGTCC  
TGCTTTAAAGTGGGAATAGCTTTGAAACTGTCGGGCTTGAGTGCAGGAGAGGTTAGTGAATTCACGTTGAGCGGTG  
AAATGCGTAGAGATTGGGAGGAACACCAGTGGCGAAGGCGACTAACTGGACTGTAACGACGCTGAGGCGCAAAGTGTG  
GGGAG  
>ASV:1524:Genus:Cloacibacterium  
TACGGAGGGTGGCAAGCGTTATCCGGAATTTATTGGGTTAAAGGGTCCGTAGGCGGACTTATGAGTCAAGTGTGAAAGCCT  
GTCGCTTAACGATAGAAGTCCATTGATACTGTAAGTCTTGAGTATATTTGAGGTAGCTGGAATAAGTAGTGTAGCGGTG  
AAATGCATAGATATTACTTAGAACCAATTGCGAAGGCGAGTTACCAAGATATAACGACGCTGAGGGACGAAAGCGTG  
GGGAG  
>ASV:1525:Genus:Blautia  
TACGTAGGGGGCAAGCGTTATCCGGAATTTACTGGGTGTAAGGGGAGCGTAGACGGCACAGCAAGTCTGATGTGAAAGGCA  
GGGGCTTAACCCCTGGACTGCATTGAAACTGCTGTGCTTGAGTGCAGGAGGGTAAGCGGAATTCCTAGTGTAGCGGTG  
AAATGCGTAGATATTAGGAGGAACACCAGTGGCGAAGGCGGCTTACTGGACGTTAACTGACGTTGAGGCTCAAAGCGTG  
GGGAG  
>ASV:1526:Genus:Fusicatenibacter  
TACGTAGGGGGCAAGCGTTATCCGGAATTTACTGGGTGTAAGGGGAGCGTAGACGGCAAGGCAAGTCTGATGTGAAAACCC  
AGGGCTTAACCTGGGACTGCATTGAAACTGCTGTGCTTGAGTGCAGGAGAGGTAAGCGGAATTCCTAGTGTAGCGGTG  
AAATGCGTAGATATTAGGAGGAACACCAGTGGCGAAGGCGGCTTACTGGACGTTAACTGACGTTGAGGCTCAAAGCGTG  
GGGAG  
>ASV:1527:Family:Ruminococcaceae  
TACGTAGGTGGCAAGCGTTGTCGGATTACTGGGTGTAAGGGGCGTGTAGGCGGGCGCTTAAAGTCAAGTGTGAAATACC  
GGAGCTTAACCTCGGGGCTGCATTGAAACTGGGTGCTTGAGTGCAGGAGAGGAAAGCGGAATTCCTAGTGTAGCGGTG  
AAATGCGTAGATATTAGGAGGAACACCAGTGGCGAAGGCGGCTTTCTGGACGTTAACTGACGTTGAGGCGCAAAGCGTG  
GGTAG  
>ASV:1528:Genus:Lachnoclostridium  
TACGTAGGGGGCAAGCGTTGTCGGATTACTGGGTGTAAGGGGAGCGTAGACGGTAAAGCAAGTCTGAAGTAAAAGCCC  
GCGGCTCAACTGCGGACTGCTTTGAAACTGTTAACTGGAGTGTGCGAGAGGTAAGTGAATTCCTAGTGTAGCGGTG  
AAATGCGTAGATATTAGGAGGAACACCAGTGGCGAAGGCGACTTACTGGACGATAACTGACGTTGAGGCTCAAAGCGTG  
GGGAG  
>ASV:1529:Species:massiliensis  
TACGTAGGGAGCAAGCGTTATCCGGAATTTATTGGGCGTAAAGCGCGCTAGGCGGCTGTTAAGCGGAATCTCTAATCTG  
AGGGCTCAACCCAGCCGATTCCGAACTGGCAGGCTCGAGTTTGTAGAGGAAAGTGAATTCACGTTGAGCGGTGA  
AATGCGCAGATATTGGGAAGAACCAGTGGCGAAGGCGACTTCTGGGCCAACACTGACGCTGAGGTCGAAAGCGTG  
GGAGC  
>ASV:1530:Genus:Dorea  
TACGTAGGGGGCAAGCGTTATCCGGAATTTACTGGGTGTAAGGGGAGCGTAGACGGCTGTGCAAGTCTGAAGTAAAAGGCA  
TGGGCTCAACCTGTGGACTGCTTTGAAACTGTGACGCTAGAGTGTGCGAGAGGTAAGCGGAATTCCTAGTGTAGCGGTG  
AAATGCGTAGATATTAGGAGGAACACCAGTGGCGAAGGCGGCTTACTGGACGATGACTGACGTTGAGGCTCAAAGCGTG  
GGGAG  
>ASV:1531:Genus:Acidaminococcus  
TACGTAGGTGGCAAGCGTTGTCGGGAATTTATTGGGCGTAAAGAGCATGTAGGCGGGCTTTTAAAGTCCGACGTGAAAATGC

GGGGCTTAACCCGATGGCGTTGGATACTGGAAGTCTTGAGTGCAGGAGAGGAAAGGGGAATCCAGTGTAGCGGTGA  
AATGCGCAGATATTGGGAGGAACACCAAGTGGCGAAGGCGCCTTTCTGGACTGTGTCTGACGCTGAGATGCGAAAGCCAGG  
GTAGC

>ASV:1532:Genus:Lachnospiraceae\_NK4A136\_group

TACGTAGGGGTAAGCGTTATCCGGATTTACTGGGTGTAAGGGAGCGTAGACGGTTTTGCAAGTCTGAAGTAAAGCCC  
GGGGCTTAACCCGGGACTGCTTTGAAACTGTAGAAGTGCAGGAGAGGTAAGTGAATTCCTAGTGTAGCGGTG  
AAATGCGTAGATATTAGGAGGAACACCAAGTGGCGAAGGCGGCTTACTGGACTGTAACGACGTTGAGGCTCGAAAGCGTG  
GGGAG

>ASV:1533:Genus:Blautia

TACGTAGAGGGCAAGCGTTATCCGGATTTACTGGGTGTAAGGGAGCGTAGACGGTGTGGCAAGTCTGATGTGAAAGGCA  
TGGGCTCAACCTGTGGACTGCATTGAAACTGTCATACTTGTAGTGCAGGAGGGTAAGCGGAATTCCTAGTGTAGCGGTG  
AAATGCGTAGATATTAGGAGGAACACCAAGTGGCGAAGGCGGCTTACTGGACGGTAACGACGTTGAGGCTCGAAAGCGTG  
GGGAG

>ASV:1534:Genus:Prevotella\_2

TACGGAAGGTCCGGCGTTATCCGGATTTATTGGGTTAAAGGGAGCGTAGGCCGCTTATAAGCGTGTGTGAAATGTC  
GGGGCTCAACCTAGGCATTGCAGCGCAACTGTGAGACTTGTAGTGCAGGAGGTAAGCGGAATTCGTCGTGTAGCGGTG  
AAATGCTTAGATATGACGAAGAAGTCCGATTGCGAAGGCGAGCTGCTGTAGCGCAACTGACGCTGAGGCTCGAAAGCGTG  
GGTAT

>ASV:1535:Genus:Domibacillus

TACGTAGGTGGCAAGCGTTGTCCGGAATTATTGGGCGTAAAGCGCGCAGGCGGCTTTAAGTCTGATGTGAAAGCCC  
ACGGCTCAACCGTGAAGGTCAATTGAAACTGGGGGACTTGTAGTGCAGAAAGAGAAGCGGAATTCACGCTGTAGCGGTG  
AAATGCGTAGAGATGTGGAGGAACACCAAGTGGCGAAGGCGGCTTTTGGTCTGTAACGACGCTGAGGCGCGAAAGCGTG  
GGGAG

>ASV:1536:Order:Chloroplast

GACAGAGGATGCAAGCGTTATCCGGAATGATTGGGCGTAAAGCGTCTGTAGGTGGCTTTTCAAGTCCGCGTCAAATCCC  
AGGGCTCAACCTGGACAGGCGGTGGAAACTACCAAGCTGGAGTACGGTAGGGGAGAGGGAATTCGCGTGGAGCGGTG  
AAATGCGTAGAGATCGGAAAGAACACCAAGCGCAAGGCACTCTGCTGGGCCGACACTGACACTGAGAGACGAAAGCTAG  
GGGAG

>ASV:1537:Genus:Dialister

TACGTAGGTGGCAAGCGTTGTCCGGAATTATTGGGCGTAAAGCGCGCAGGCGGCTTTCAAGTCCCTCTTAAAAGTGC  
GGGGCTTAACCTGTGATGGGAAGGAAACTGGGAAGCTGGAGTATCGGAGAGGAAAGTGAATTCCTAGTGTAGCGGTGA  
AATGCGTAGAGATTAGGAAGAACACCGGTGGCGAAGGCGACTTTCTGGACAAAAGTACGCTGAGGCGCGAAAGCGGTG  
GGAGC

>ASV:1538:Family:Desulfovibrionaceae

TACGGAGGGTGCAGCGTTAATCCGGAATTACTGGGCGTAAAGCGCACGTAGGCTGTATGTCAAGTCAAGGGTGAATCCC  
ACGGCTCAACCGTGAAGTGCCTTTGAAACTGGCAAAGTGGAGTATGTGAGAGGGCGGCGGAATTCCTGGTGTAGGAGTG  
AAATCCGTAGATATCAGGAGGAACATCAGTGGCGAAGGCGGCGCTTGGCACAAAAGTACGCTGAGGTGCGAAAGCGTG  
GGTAG

>ASV:1539:Species:laneus

TACGGAGGATGCGAGCGTTATCCGGATTTATTGGGTTAAAGGGTGCAGGCGGCTTTATAAGTGTAGTGGTAAAATTC  
GGAGCTTCACTCCGGTCCGCATTAAGTGTAGAGCTAGAGAATGGACGAGGTAGGCGGAATAAGTAAAGTGTAGCGGTGA  
AATGCATAGATATAACTTAGAACTCCGATAGCGAAGGCGAGCTTACCAGACCATAACTGACGCTGATGCACGAGAGCGGTG  
GTAGC

>ASV:1540:Genus:Subdoligranulum

AACGTAGGGTGCAGCGTTGTCCGGAATTACTGGGTGTAAGGGAGCGCAGGCGGACCGGCAAGTTGGAAGTAAAACCA  
TAGGCTCAACCTATGGATTGCTTTCAAAGTGTGCTGGCCTTGTAGTGTGACAGGAGGAGGTTGGAATTCGCGTGTAGCGGTG  
GAATGCGTAGATATCGGAGGAACACCAAGTGGCGAAGGCGGCTTACTGGCACCAACTGACGCTGAGGCTCGAAAGCATG  
GGTAG

>ASV:1541:Genus:Blautia

TACGTAGGGGGCAAGCGTTATCCGGATTTACTGGGTGTAAGGGAGCGTAGACGGCGGAGCAAGTCTGATGTGAAAGGCA  
GGGGCTTAACCCCTGGACTGCATTGAAACTGTTTGTAGTGCAGGAGGTAAGCGGAATTCCTAGTGTAGCGGTG  
AAATGCGTAGATATTAGGAGGAACACCAAGTGGCGAAGGCGGCTTACTGGACGGTAACGACGTTGAGGCTCGAAAGCGTG  
GGGAG

>ASV:1542:Genus:Dorea

TACGTAGGGGGCAAGCGTTATCCGGATTTACTGGGTGTAAGGGAGCGTAGACGGCACGGCAAGCCAGATGTGAAAGCCC  
GGGGCTCAACCCGGGACTGCATTTGAAACTGCTGAGCTAGAGTGTGCGAGAGGCAAGTGAATTCCTAGTGTAGCGGTG  
AAATGCGTAGATATTAGGAGGAACACCAAGTGGCGAAGGCGGCTTGTAGACGATGACTGACGTTGAGGCTCGAAAGCGTG  
GGGAG

>ASV:1543:Species:sediminicola

TACGGAGGGAGCTAGCGTTGTTCCGGAATTACTGGGCGTAAAGCGCACGTAGGCGGTTACTCAAGTCAAGGTTGAAAGCCC  
GGGGCTCAACCCGGAACTGCCTTTGAAACTAGGTAAGTGTAGAACTCCTGGAGAGGTGAGTGAATTCGAGTGTAGAGGTG  
AAATTCGTAGATATTGGAAGAACACCAAGTGGCGAAGGCGGCTTACTGGACAGGTATTGACGCTGAGGTGCGAAAGCGTG  
GGGAG

>ASV:1544:Family:Ruminococcaceae

TACGTAGGTGGCAAGCGTTGTCCGATTTACTGGGTGTAAGGGCGCGTAGGCGGGATGGCAAGTCAAGTGTGAAATCCA  
TGGGCTCAACCCATGAAGTGCATTTGAAACTGCTGTTCTTGTAGTATCGGAGAGGCAAGCGGAATTCCTAGTGTAGCGGTG  
AAATGCGTAGATATTAGGAGGAACAGCAGTGGCGAAGGCGGCTTGTGGACGACAACTGACGCTGAGGCGCGAAAGCGTG  
GGGAG

>ASV:1545:Genus:Family\_XIII\_AD3011\_group  
TACGTAGGGGCAAGCGTTATCCGGAATTATTGGGCGTAAAGAGTACGTAGGTGGTTTTCTAAGCACGGGGTTAAAGGCA  
ATGGCTTAACCATTTGTCCTTATGAACTGGAAGACTTGAGTGCAGGAGAGAAAGCGGAATTCCTAGTGTAGCGGTGA  
AATGCGTAGATATTAGGAGGAACACCAGTGGCGAAGGCGGCTTTCTGGACTGTAACCTGACACTGAGGTACGAAAGCGTGG  
GGAGC

>ASV:1546:Family:Ruminococcaceae  
AACGTAGGGTGTAGCGTTGTCCGGAATTACTGGGTGTAAAGGGAGCGCAGGTGGCAGTGAAGTTGGATGTAATACTA  
CGGGCTCAACCCGGTACTGCATTGAAACTGTGAGCTAGAGTGTGCGAGGGGTAAGTGAATTCCTAGTGTAGCGGTG  
AATGCGTAGATATCGGAAGGAACATCAGTGGCGAAGGCGACCTACTGGGCTTAACTGACGCTGAGGCTCGAAAGCATGG  
GTAGC

>ASV:1547:Genus:Agathobacter  
TACGTATGGAGCAAGCGTTATCCGGAATTACTGGGTGTAAAGGGAGCGTAGGCGGCTCTGCAAGTCTGATGTGAAAGACC  
GGGGCTCAACCCGGTACTGCATTGAAACTGTAGGACTAGAGTGTGCGAGGGGTAAGTGAATTCCTAGTGTAGCGGTG  
AATGCGTAGATATTAGGAGGAACACCAGTGGCGAAGGCGGCTTACTGGACGACTACTGACGCTGAGGCTCGAAAGCGTG  
GGGAG

>ASV:1548:Genus:Agathobacter  
TACGTATGGTGAAGCGTTATCCGGAATTACTGGGTGTAAAGGGAGCGCAGGCGGTGCGCAAGTCTGATGTGAAAGCCC  
GGGGCTTAACCCGGTACTGCATTGAAACTGTGAGCTAGAGTGTGCGAGGGGTAAGTGAATTCCTAGTGTAGCGGTG  
AATGCGTAGATATTAGGAGGAACACCAGTGGCGAAGGCGGCTTACTGGACGATAACTGACGCTGAGGCTCGAAAGCGTG  
GGGAG

>ASV:1549:Species:formigenes  
TACGTAGGGTGCAGCGTTAATCCGGAATTACTGGGCGTAAAGCGTGCAGGCGGTTGTGTAAGACAGATGTGAAATGCC  
CGGGCTTAACCTGGGAATTGCATTGAACTGACCGCTAGAGTGTGTCAGAGGGGGTAGAATTCACGCTGTAGCAGTG  
AATGCGTAGATATTGAGGGAATACCGATGGCGAAGGCGGCTTACTGGACGATAACTGACGCTCATGCACGAAAGCGTG  
GGGAG

>ASV:1550:Family:Ruminococcaceae  
TACGTAGGTGGCAAGCGTTGTCCGGAATTACTGGGTGTAAAGGGCGTGTAGGCGGGATGGCAGGTGAGTGTGAAATACT  
CGGGCTTAACCTGGGAATTGCATTGAAACCCTGTTCTTGTAGTGCAGGAGAGGGAAGCGGAATTCCTAGTGTAGCGGTG  
AATGCGTAGATATTAGGAGGAACACCAGTGGCGAAGGCGGCTTTCTGGACGTAACCTGACGCTGAGGCGGAAAGCGTG  
GGGAG

>ASV:1551:Species:micra  
TACGTATGGGCGAGCGTTGTCCGGAATTATTGGGCGTAAAGGGTACGTAGGCGGTTTTTAAAGTCAAGTGTGAAAGCGT  
GAGGCTTAACCTCATTAAAGCACTTGAAGACTTGAAGACTTGAAGGAGAGGAAAGTGAATTCCTAGTGTAGCGGTGA  
AATGCGTAGATATTAGGAGGAATACCGGTGGCGAAGGCGACTTTCTGGACTTTACTGACGCTCAGGTACGAAAGCGTGG  
GGAGC

>ASV:1552:Genus:Lachnoclostridium  
TACGTAGGGGGCAAGCGTTATCCGGAATTACTGGGTGTAAAGGGAGCGCAGGCGGACTGCAAGTCTGAAGTGAAGGCC  
GGGGCTCAACCCGGGACTGCTTTGAAACTGTAGAGCTAGAGTGTGAGAGGCAAGCGGAATTCCTAGTGTAGCGGTG  
AATGCGTAGATATTAGGAGGAACACCAGTGGCGAAGGCGGCTTCTGGACAGTAACCTGACGCTCAGGCTCGAAAGCGTG  
GGGAG

>ASV:1553:Family:Ruminococcaceae  
TACGTAGGTGGCAAGCGTTATCCGGAATTACTGGGTGTAAAGGGAGCGCAGGCGGGATAGCAAGTCAAGTGTGAAA  
TACTGAGGCTCAACCCATAAACTGCAAGTGAAGTGTATTTCTTGTAGTGGAGTAGAGGCAAGCGGAATTCAGTGTGCGG  
GTG  
AATGCGTAGATATTGAGGAGGAACACCAGTGGCGAAGGCGGCTTCTGGGCTCTAAGTCAAGTGTGAAAAGTGTG  
GGGAG

>ASV:1554:Genus:Akkermansia  
TACAGAGGTCTCAAGCGTTGTCCGGAATTACTGGGCGTAAAGCGTGCCTAGGCTGTTTCGTAAGTGTGTGTAAGGCG  
CGGGCTCAACCCGGGACTGCTTTGAAACTGTAGAGCTAGAGTGTGAGAGGCAAGCGGAATTCCTAGTGTAGCGGTG  
AATGCGTAGATATCGAGAGGAACACTCGTGGCGAAGGCGGCTTCTGGACATTAACCTGACGCTGAGGCTCGAAAGCGTG  
GGGAG

>ASV:1555:Genus:Peptococcus  
AACATAGGGGGCAAGCGTTGTCCGGAATTACTGGGCGTAAAGGGCGCGTAGGTGGTCTGTTAAGTCAAGTGTGAAATGTA  
AGGGCTCAACCCCTAACGTGCATCTGATACTGGCAGACTTGAAGTGCAGGAGGCAAGTGAATTCCTAGTGTAGCGGTG  
AATGCGTAGATATTAGGAGGAACACCAGTGGCGAAGGCGACTTCTGGGCGTAACTGACGCTGAGGCGGAAAGCGTG  
GGGAG

>ASV:1556:Family:Muribaculaceae  
TACGGAGGATGCGAGCGTTATCCGGAATTATTGGGTTAAAGGGTGCAGGCGGGATCAAGTCAAGTGTGAAAAGTGC  
GGGGCTCAACCCGACTGCCGTTGAAACTGGTCTGCTTGTAGTGGAGAGAAGTAGGCGGAATGCGCGGTGTAGCGGTGA  
AATGCATAGATATCGCGAGAACTCCGATTGGCGAAGGCGACTTACCGGCTCCATACTGACGCTGAGGACGAAAGCGTGG  
GGATC

>ASV:1557:Kingdom:Bacteria  
TACGTAGGGGGCGAGCGTTGTCCGGAATTACTGGGCGTAAAGGGCGCGTAGGCGGTTGAATAAGTCTGTTGTGAAATCC  
AAGGCTTAACCTTGGCAGTGAATGAAACTGTTGACTTGTAGTACGGCAGAGGCAAGTGAATTCCTAGTGTAGCGGTG  
AATGCACAGAGATTGGGAGGAACACCAGTGGCGAAGGCGACTTCTGGGCGTAACTGACGCTGAGGCGGAAAGCGTG  
GGGAG

>ASV:1558:Genus:Dialister  
TACGTAGGTGGCAAGCGTTGTCCGGAATTATTGGGCGTAAAGGGCGCGCAGGCGGTTTCATAAGTCTGTCTTAAAGTGC  
GGGGCTTAACCCGTTAGTGGGAAGGAACTGGGAAGTGGAGTATCGGAGAGGAAAGTGAATTCCTAGTGTAGCGGTGA

AATGCGTAGAGATTAGGAAGAACCACCGGTGGCGAAGGCAGCTTTCTGGACGAAAACCTGACGCTGAGGCGCAAAGCGTGG  
GGAG  
>ASV:1559:Genus:Bacteroides  
TACGGAGGATCCGAGCGTTATCCGGATTTATTGGGTTAAAGGGAGCGTAGATGGATGTTAAAGTCACTTTGTGAAAGTTT  
GCGGCTCAACCGTAAAATTGCAGTTGATACTGGATATCTTGAGTGCAGTTGAGGCGAGGCGGAATTCGTGGTGTAGCGGTG  
AAATGCGTAGATATACGAAGAACCTCCGATTGCCGAGGCAGCTTACTAGTTGCAACTGACATTGAGGCTCGAAAGTGTG  
GGTAT  
>ASV:1560:Genus:Blautia  
TACGTAGGGGGCAAGCGTTATCCGGATTTACTGGGTGTAAGGGAGCGTAGACGGATGGACAAGTCTGATGTGAAAGGCT  
GGGGCTCAACCCGGGACTGCATTGAAAAGTCCGTTCTTGAGTGCCGGGAGAGGTAAGCGGAATTCCTAGTGTAGCGGTG  
AAATGCGTAGATATTAGGAGGAACACCAAGTGCCGAGGCAGCTTACTGGACGTTAACTGACGTTGAGGCTCGAAAGCGTG  
GGAG  
>ASV:1561:Family:Lachnospiraceae  
TACGTAGGGGGCAAGCGTTATCCGGATTTACTGGGTGTAAGGGAGCGTAGACGGCAGCGCAAGTCTGAAGTAAAAGCCC  
GGGGCTCAACCCGGAATGGCTTTGAAAAGTCCGCGCTAGAGTACCGGAGGGGTAAAGCGGAATTCCTAGTGTAGCGGTG  
AAATGCGTAGATATTAGGAGGAACACCAAGTGCCGAGGCAGCTTACTGGACGTTAACTGACGTTGAGGCTCGAAAGCGTG  
GGAG  
>ASV:1562:Genus:Pseudobutyrvibrio  
TACGTATGGTGCAAGCGTTATCCGGATTTACTGGGTGTAAGGGAGCGTAGGCGGTTTTATAAGTCTGATGTGAAAGCCC  
GGGGCTCAACCCGGGACTGCATTGAAAAGTGTAGAACTAGAGTGTCCGGAGGGTAAGTGAATTCCTAGTGTAGCGGTG  
AAATGCGTAGATATTAGGAGGAACACCAAGTGCCGAGGCAGCTTACTGGACGTTAACTGACGTTGAGGCTCGAAAGCGTG  
GGAG  
>ASV:1563:Genus:Agathobacter  
TACGTATGGTGCAAGCGTTATCCGGATTTACTGGGTGTAAGGGAGCGCAGGCGGTGCCGCAAGTCTGATGTGAAAGCCC  
GGGGCTCAACCCGGTACTGCATTGAAAAGTGTACTAGAGTGTCCGGAGGGTAAGCGGAATTCCTAGTGTAGCGGTG  
AAATGCGTAGATATTAGGAGGAACACCAAGTGCCGAGGCAGCTTCTGACTGATAACTGACGCTGAGGCTCGAAAGCGTG  
GGAG  
>ASV:1564:Order:Clostridiales  
TACGTAGGTTGCGAGCGTTGTCGGATTTACTGGGTGTAAGGGTGCAGGCGGAAACCAAGTCAAGTGTGAAAGACC  
ACGGCTCAACCGTGGTACTGCATTTGAAAAGTGTGTTTCTTGAGTGCAGGAGAGGTAAGCGGAATTCCTAGTGTAGCGGTG  
AAATGCGTAGATATTGGGAGGAACACCAAGTGCCGAGGCAGCTTACTGGACTGTAACGACGCTGAAGCACGAAAGCGTG  
GGGAT  
>ASV:1565:Genus:Butyricimonas  
TACGGGGATGCGAGCGTTATCCGGATTTATTGGGTTAAAGGGCGCGTAGGCGGGACGCCAAGTCAAGTCAAGTCAAGTCAAGTCA  
GCAGTAAACTGTAGCACGCCGTTGAAAAGTGCAGTCCGAGACGAGACGAGGAGGCGGAACAAGTGAAGTCAAGTCAAGTCAAGTCA  
AATGCATAGATACCTTGAACCCGATAGCGAAGGCAGCTTCCAGGCTCGATCTGACGCTGATGCGGAGAGCGGTG  
GTAGC  
>ASV:1566:Genus:Clostridium\_sensu\_stricto\_1  
TACGTAGGTGGCGAGCGTTGTCGGATTTACTGGCGTAAAGGGAGCGTAGGCGGATTTTAAAGTGAAGTGTGAAAATACT  
CGGGCTTAACCTGAGTGTGCTGATTTCAAAGTCTAGAGTGCAGGAGAGGAGAAGGGAATTCCTAGTGTAGCGGTG  
AAATGCGTAGAGATTAGGAAGAACACCAAGTGCCGAGGCAGCTTCTGACTGTAACGACGCTGAGGCTCGAAAGCGTG  
GGAG  
>ASV:1567:Genus:GCA-900066225  
TACGTAGGTGGCAAGCGTTGTCGGAACTACTGGGTGTAAGGGAGCGTAGGCGGGAAAGACAAGTGGGAGTGAATGTGTA  
TGGGCTTAACCCATAAAGTCTTTCAAAGTGTGTTTTCTTGAGTGAAGTGAAGGCAGGCGGAATTCCTAGTGTAGCGGTG  
AAATGCGTAAATATTAGGAGGAACACCAAGTGCCGAGGCAGCTTCTGAGCCTTAACGACGCTGAGGCTCGAAAGCGTG  
GGTAG  
>ASV:1568:Species:vaginae  
TACGTAGGGGGCAAGCGTTATCCGGATTTACTGGGCGTAAAGCGCGCTAGGCGGTCTGTTAGGTCAGGAGTTAAATCTG  
GGGGCTCAACCCCTATCCGCTCCTGATACCGCAGGCTTGAAGTCTGTTAGGGGAAAGTGAATTCCTAGTGTAGCGGTG  
AATGCGCAGATATTGGAAGAACACCGGTGGCGAAGGCAGCTTCTGGCCATGACTGACGCTGAGGCGCAAAGCTAGG  
GGAG  
>ASV:1569:Family:Veillonellaceae  
TACGTAGGTGGCAAGCGTTGTCGGAACTATTGGGCGTAAAGCGCGCGCAGGCGGTTTTTAAAGTCCGCTTTAAAAGTGC  
AGGGCTTAACCTGTGATGGGACTGAAACTGGAAGACTAGAGTATCGAGAGGAAAGTGAATTCCTAGTGTAGCGGTG  
AATGCGTAGATATTAGGAGGAACACCAAGTGCCGAGGCAGCTTCTGACGAAAACCTGACGCTGAGGCGCAAAGCCAGG  
GGAG  
>ASV:1570:Family:Ruminococcaceae  
TACGTAGGGAGCGAGCGTTGTCGGATTTACTGGGTGTAAGGGTGCAGGCGGGCTGTCAAGTCAAGTCAAGTCAAGTCAAGTCA  
GGAGCTCAACTCCGGGCTGCATTTGAAAAGTGTGTTGAGTGAAGTGAAGGCAGGCGGAATTCCTAGTGTAGCGGTG  
AAATGCGTAGATATTAGGAGGAACACCAAGTGCCGAGGCAGCTTCTGAGCAAAACCTGACGCTGAGGCGCAAAGCCAGG  
GGAG  
>ASV:1571:Family:Muribaculaceae  
TACGGAGGATGCGAGCGTTATCCGGATTTATTGGGTTAAAGGGTGCCGAGGCGGCTGTAAAGTCAAGTCAAGTCAAGTCAAGTCA  
GGGGCTCAACCCGGCGAGCGGTTGAAAAGTGCAGTGTAGAGTGGGCAGGAGTATGCGGAATGCGTGGTGTAGCGGTG  
AATGCATAGATATACGCGAAGCTCCGATTGCCGAGGCAGCATAACGCGCCCTACTGACGCTCATGACGAAAAGCGTGG  
GTATC  
>ASV:1572:Species:aotearoense/butyriciformans/calidifontis/thermosaccharolyticum/

thermostercoris/thermosulfurigenes/xylanolyticum  
TACGTAGGGGGCGAGCGTTGTCCGGAATTACTGGGCGTAAAGAGCACGTAGGCGGCTATAAAAGTCAGATGTGAAAAACC  
TGGGCTCAACCGAGGGTATGCATCTGAAACTAAATAGCTTGAGTCAAGGAGAGGAGCGGAATTCCTGGTGTAGCGGTG  
AAATGCGTAGATATACGGAAGAATACCACTGGCGAAAGCGGCTCTCTGGACTTGAACGACGCTGAGGTGCGAAAGCGTG  
GGGAG  
>ASV:1573:Genus:Butyricicoccus  
TACGTAGGGAGCAAGCGTTATCCGGATTTACTGGGTGTAAAGGGCGAGTAGGCGGGCTGGTAAGTTGGAAGTAAATCTG  
GGGCTCAACCCCAAACCTGCTTTCAAACCTGCTGGTCTTGAGTGTGAGAGGCGAGCGGAATTCCTGTGTAGCGGTG  
AAATGCGTAGATATACGGAAGAACCACCACTGGCGAAAGCGGCTCTCTGGACTTAACTGACGCTGAGGAGCGAAAGCGTG  
GGGAG  
>ASV:1574:Genus:Dorea  
TACGTAGGGGGCAAGCGTTATCCGGATTTACTGGGTGTAAAGGGAGCGTAGACGGCTGTGCAAGTCTGAAGTAAAGGCA  
TGGGCTCAACCTGTGGACTGCTTTGAAACTGTGTAGCTAGAGTGTGCGAGAGGTAAGTGAATTCCTAGTGTAGCGGTG  
AAATGCGTAGATATTAGGAGGAACACCACTGGCGAAAGCGGCTTACTGGACGATGACTGACGTTGAGGCTCGAAAGCGTG  
GGGAG  
>ASV:1575:Species:cristatus/sanguinis  
TACGTAGGTCCTCCGAGCGTTGTCCGGATTTATTGGGCGTAAAGCGAGCGAGCGGTTAGATAAGTCTGAAGTTAAAGGCT  
GTGGCTTAACCATAGTATGCTTTGAAACTGTTAACTTGAAGTGCAGAAAGGGAGAGTGAATTCCTAGTGTAGCGGTG  
AATGCGTAGATATATGGAGGAACACCGGTGGCGAAAGCGGCTCTCTGGTCTGTAACGACGCTGAGGCTCGAAAGCGTG  
GGAGC  
>ASV:1576:Genus:Cloacibacterium  
TACGGAGGGTGCAAGCGTTATCCGGATTTATTGGGTTAAAGGGTCCGTAGGCGGACTTATAAGTCAGTGGTGAAGCCT  
GTCGCTTAACCATAGAACTGCCATTGATACTGTAAGTCTTGAGTATATTTGAGGTAGCTGGAATAAGTGTAGCGGTG  
AAATGCATAGATATTACTTAGAACCAATTCGAAGGCAGGTTACCAAGATATAACTGACGCTGAGGGACAAAAGCGTG  
GGGAG  
>ASV:1577:Family:Christensenellaceae  
TACGTAGGGAGCAAGCGTTGTCCGGAATTACTGGGCGTAAAGGGTGCCTAGGCGGTTGTTAAAGTCAGATGTGAAATACC  
CGGGCTTAACCTCGGGGCTGCATCTGATACTGGATAACTAGAGTGCAGGAGAGGAAAGTGAATTCCTAGTGTAGCGGTG  
GAATGCGTAGATATTAGGAGGAACACCACTGGCGAAAGCGGCTTCTGGACTGTAACGACGCTGAGGCACGAAAGTATG  
GGTAG  
>ASV:1578:Genus:Blautia  
TACGTAGGGGGCAAGTGTATCCGGATTTACTGGGTGTAAAGGGAGCGTAGACGGATGGACAAGTCTGATGTGAAAGGCT  
GGGGCTCAACCCCGGACTGCATTTGAAACTGCCCGTCTTGAGTGCCGGAGAGGTAAGCGGAATTCCTAGTGTAGCGGTG  
AAATGCGTAGATATTAGGAGGAACACCACTGGCGAAAGCGGCTTACTGGACGTAACGACGTTGAGGCTCGAAAGCGTG  
GGGAG  
>ASV:1579:Genus:Dorea  
TACGTAGGGGGCAAGTGTATCCGGATTTACTGGGTGTAAAGGGAGCGTAGACGGCACGGCAAGCCAGATGTGAAAGCCC  
GGGGCTCAACCCCGGACTGCATTTGAAACTGCTGAGCTAGAGTGTGCGAGAGGCAAGTGAATTCCTAGTGTAGCGGTG  
AAATGCGTAGATATTAGGAGGAACACCACTGGCGAAAGCGGCTTCTGGACGATGACTGACGTTGAGGCTCGAAAGCGTG  
GGGAG  
>ASV:1580:Family:Ruminococcaceae  
TACGTAGGTGGCAAGCGTTGTCCGGATTTACTGGGTGTAAAGGGCGTGTAGGCGGGGAAGTAAGTCAGATGTGAAATACC  
GGAGCTTAACCTCGGGGCTGCATTTGAAACTGCATCTCTTGAGTGCCGGAGAGGAAAGCGGAATTCCTAGTGTAGCGGTG  
AAATGCGTAGATATTAGGAGGAACACCACTGGCGAAAGCGGCTTCTGGACGTAACGACGCTGAGGCGCAAAGCGTG  
GGGAG  
>ASV:1581:Genus:Parabacteroides  
TACGGAGGATCCGAGCGTTATCCGGATTTATTGGGTTAAAGGGTGCCTAGGCGGCTTTTAAAGTCAGCGGTGAAAGTCT  
GTGGCTCAACCATAGAAATGCGGTTGAAACTGGGAGGCTTGAAGTATGTTTGAAGGAGGCGGAATGCGTGGTGTAGCGGTG  
AAATGCATAGATATCACGAGAAGTCCGATTGCGAAGGCAGCTTACTAAACCATAACTGACACTGAAGCACGAAAGCGTG  
GGGAT  
>ASV:1582:Genus:Faecalibacterium  
AACGTAGGTCAACAGCGTTGTCCGGAATTACTGGGTGTAAAGGGAGCGCAGGCGGGCAGACAAGTTGGAAGTAAATCCA  
TGGGCTCAACCCATGAAGTCTTTCAAACCTGTATGTCTTGAGTGTGAGAGGTAGGCGGAATTCCTGGTGTAGCGGTG  
GAATGCGTAGATATCGGGAGGAACACCACTGGCGAAAGCGGCTTACTGGGCACCAACTGACGCTGAGGCTCGAAAGTGTG  
GGTAG  
>ASV:1583:Genus:Prevotella\_9  
TACGGAAGGTCGGGGCTTATCCGGATTTATTGGGTTAAAGGGAGCGTAGGCGGAGATTAAGCGTGTGTGAAATGTA  
GATGCTCAACATCTGCACTGCAGCGCAACTGGTTTCTTGAGTACGCACGAAGTGGGCGGAATTCCTGGTGTAGCGGTG  
AAATGCTTAGATATACGAAGAAGTCCGATTGCGAAGGCAGCTCACTGGAGCGCAACTGACGCTGAAGCTCGAAAGTGGC  
GGTAT  
>ASV:1584:Genus:Faecalibacterium  
AACGTAGGTCAACAGCGTTGTCCGGAATTACTGGGTGTAAAGGGAGCGCAGGCGGGAAGGCAAGTTGGAAGTAAATCCA  
TGGGCTCAACCCATGAAGTCTTTCAAACCTGTTTCTTGAGTGTGAGAGGTAGGCGAATTCCTGGTGTAGCGGTG  
GAATGCGTAGATATCGGGAGGAACACCACTGGCGAAAGCGGCTTACTGGGCACCAACTGACGCTGAGGCTCGAAAGTGTG  
GGTAG  
>ASV:1585:Genus:Parasutterella  
TACGTAGGGTGCAGCGTTAATCGGAATTACTGGGCGTAAAGGGTGCAGGCGGTTGAGTAAGACAGATGTGAAATCCC  
CGAGCTTAACCTCGGGAATGGCATATGTGACTGCTCGCTAGAGTGTGTGAGAGGAGGTGAATTCACGCTGTAGCAGTG

AAATGCGTAGATATGTGGAAGAACACCGATGGCGAAGGCAGCCTCCTGGGACATGACTGACGCTCAGGCACGAAAGCGTG  
GGGAG  
>ASV:1586:Family:Ruminococcaceae  
AACGTAGGTCACAAGCGTTGTCCGGAATTACTGGGTGTAAGGGAGCGCAGGCGGAAGACAAGTTGGAAGTAAAATCCA  
TGGGCTCAACCCATGAAGTCTTTCAAAGTGTCTTTCTTGAGTAGTGCAGAGGTAGGCGGAATTCCTGGTGTAGCGGTG  
GAATGCGCAGATATCGGAAGAACACCGATGGCGAAGGCAGCCTGCTGGGCCCCACTGACGCTGAGGCGCGAAAGCTGG  
GGGAG  
>ASV:1587:Genus:Prevotella\_9  
TACGGAAGGTCGGGCGTTATCCGGATTTATTGGGTTAAAGGGAGCGTAGGCCGGAGATTAAGCGTGTGTGAAATGTA  
GATGCTCAACATCTGCACTGCAGCGCAACTGGTTTCTTGGTACGCATAAAGTGGGCGGAATTCGTGGTGTAGCGGTG  
AAATGCTTAGATATCAGGAAGAACTCCGATTGCGAAGGCAGCTCACAGGGGCCCAACTGACGCTGAAGCTCGAAAGCGCG  
GGTAT  
>ASV:1588:Family:Lachnospiraceae  
TACGTATGGTCAAGCGTTATCCAGATTTACTGGGTGTAAGGGAGCGTAGACGGAGTGCCAAGTCTGATGTGAAAACCC  
GGGGCTCAACCCGGGACTGCATTGAAAAGTCTCAATCTGGAGTACCGGAGAGGTAAAGCGGAATTCCTAGTGTAGCGGTG  
AAATGCGTAGATATTAGGAGGAACACCAAGTGGCGAAGGCAGCTTACTGGACGTTAAGTACGCTTGAAGCTCGAAAGCGTG  
GGGAG  
>ASV:1589:Genus:Intestinimonas  
TACGTAGGTGGCAAGCGTTATCCGGATTTACTGGGTGTAAGGGCGGTAGGCCGGACTGCAAGTCAAGTGTGAAAACCTA  
TGGGCTCAACCCATAGCCTGCATTTGAAAAGTGTAGTTCTTGGTACGCATAAAGTGGGCGGAATTCCTGGTGTAGCGGTG  
AAATGCTAGATATACGGAGGAACACCAAGTGGCGAAGGCAGCTTACTGGACAGTAACTGACGCTGAGGCGCGAAAGCGTG  
GGGAG  
>ASV:1590:Species:sinensis/timonensis  
TACGTAGGGAGCGAGCGTTATCCGGATTTACTGGGCGTAAAGAGCGCGTAGGCCGGCTTTCAAGCGGGATCTCTAATCCG  
AGGGCTCAACCCCGGCGGATCCCGAACTGGGAGGCTCGAGTTCGGTAGAGGCAGGCGGAATTCCTGGTGTAGCGGTGG  
AATGCGCAGATATCGGAAGAACACCGATGGCGAAGGCAGCTGCTGGGCCGAAACTGACGCTGAGGCGCGAAAGCTAGG  
GGAGC  
>ASV:1591:Species:varium  
TACGTATGTCGCAAGCGTTATCCGGATTTATTGGGCGTAAAGCGCGTCTAGGCCGTTAGTAAAGTCTGATGTGAAAATGC  
GGGGCTCAACCCGATTGCGTTGAAAAGTGTAAACTAGAGTACTGGAGAGGTAGGCCGGAACTACAAGTGTAGAGGTGA  
AATTCGTAGATATTTGTAGGAATGCCGATGGGGAAGCCAGCTACTGGACAGATACTGACGCTAAAGCGCGAAAGCGTG  
GTAGC  
>ASV:1592:Genus:Parasutterella  
TACGTAGGGTGCAGCGTTAATCCGAATTACTGGGCGTAAAGGGTGGCAGGCGGTTAGTAAGACAGATGTGAAATCCC  
CGGGCTTAACCCGGGAATGGCATAATGTGACTGCTCGACTAGAGTGTGTGAGAGGGAGGTGGAATTCACGTTAGCAGTG  
AAATGCGTAGATATGTGGAAGAACACCGATGGCGAAGGCAGCCTCCTGGGACATAACTGACGCTCAGGCACGAAAGCGTG  
GGGAG  
>ASV:1593:Genus:Butyricimonas  
CACGGGGGATGCGAGCGTTATCCGGATTTATTGGGTTAAAGGGCGCGTAGGCCGGATGCCAAGTCAAGCGTAAAAGACT  
GCAGCTAAACTGTAGCACCGGTTGAAAAGTGTAGCCTCGAGACGAGTGCAGGATGGCGGAACAAGTGAAGTACGCGGTGA  
AATGCTTAGATATCACTTGAACCCCGATAGCGAAGGCAGCTGTCCAGACTCGATCTGACGCTGATGCGCGAGAGCGGTG  
GTAGC  
>ASV:1594:Genus:Bacteroides  
TACGGAGGATCCGAGCGTTATCCGGATTTATTGGGTTAAAGGGAGCGTAGGCCGACGCTTAAAGTCAAGTGTGAAAAGTTT  
GCGGCTCAACCCGTAATTTGAGTTGATACTGGCAGTCTTGGTGCAGTAGAGGTGGGCGGAATTCCTGGTGTAGCGGTG  
AAATGCGTAGATATTAGGAGGAACACCAAGTGGCGAAGGCAGCCTTACTGGACAGTAACTGACGCTTGAAGCTCGAAAGCGTG  
GGGAG  
>ASV:1595:Genus:Prevotella\_2  
TACGGAAGGTCGGGCGTTATCCGGATTTATTGGGTTAAAGGGAGCGTAGGCCGCTTATAAGCGTGTGTGAAATGTC  
GGGGCTCAACCTGGGCAATTGCAGCGCAACTGTGAGACTTGAAGTGCAGCGGGAAGTAGGCCGGAATTCCTGGTGTAGCGGTG  
AAATGCTTAGATATGACGAAGAACTCCGATTGCGAAGGCAGCCTGCTGTAGCGCAACTGACGCTGAAGCTCGAAAGCGTG  
GGTAT  
>ASV:1596:Family:Lachnospiraceae  
TACGTAGGGGGCAAGCGTTATCCGGATTTACTGGGTGTAAGGGAGCGTAGACGGGCCAGCAAGTCTGATGTGAAAACCC  
GGGGCCCAACCCGGGAGTGCATTGAAAAGTGCAGGCGCTGGAGTGCAGGAGAGGTAAAGCGGAATTCCTAGTGTAGCGGTG  
AAATGCGTAGATATTAGGAGGAACACCAAGTGGCGAAGGCAGCCTTACTGGACGTTAAGTACGCTTGAAGCTCGAAAGCGTG  
GGGAG  
>ASV:1597:Species:amylolyticus/ayderensis/beppuensis/bogrovensis/flavithermus/gonensis/  
kamchatkensis/kaynarcensis/kestanbolensis/mongoliensis/pushchinoensis/rupiensis/suryakundensis/  
tengchongensis/thermarum/tunisiense/voinovskiensis  
TACGTAGGTGGCAAGCGTTGTCCGGAATTTATTGGGTTAAAGGGAGCGTAGGCCGGTCTTAAAGTCTGATGTGAAAAGCCC  
ACGGCTCAACCGTGGAGGGTCAATGGAAAAGTGGGGGACTTGAAGTGCAGAAAGAGGAGGCGGAATTCACGTTAGCGGTG  
AAATGCTTAGATATGTGGAAGAACACCAAGTGGCGAAGGCAGCCTCTGGTCTGTAAGTACGCTGAGGCGCGAAAGCGTG  
GGGAG  
>ASV:1598:Genus:Prevotella\_9  
TACGGAAGGTCGGGCGTTATCCGGATTTATTGGGTTAAAGGGAGCGTAGGCCGGAGATTAAGCGTGTGTGAAATGTA  
GTGGCTCAACCTCTGCACTGCAGCGCAACTGGTTTCTTGGTACGCACAACGTTGGGCGGAATTCGTGGTGTAGCGGTG  
AAATGCTTAGATATCAGGAAGAACTCCGATTGCGAAGGCAGCTCACGGGAGCGCAACTGACGCTGAAGCTCGAAAGTGGC

GGTAT

>ASV:1599:Family:Ruminococcaceae

AACGTAGGTGGCAAGCGTTGTCCGGAATTACTGGGTGTAAGGGGAGCGCAGGCGGAAGCGCAAGTTGGATGTGAAACCCA  
TGGGCTCAACCCATGGCCTGCATCCAAAACCTGTTTTCTTGAGTAGTGCAGAGGTAGCGGGAATTCCTGGTGTAGCGGTG  
GAATGCGTAGATATCGGGAGGAACACCAGTGGCGAAGGCGGCTACTGGGCACCAACTGACGCTGAGGCTCGAAAGCATG  
GGTAG

>ASV:1600:Genus:Chryseobacterium

TACGGAGGGTGCAAGCGTTATCCGGATTTATTGGGTTAAAGGGTCCGTAGCGGACCGATAAGTCAGTGGTGAATCTC  
ATAGCTTAACCTATGAAACTGCCGTTGATACTGTCGGTCTTGAGTAAATTAGAGGTAGCTGGAATAAGTAGTGTAGCGGTG  
AAATGCATAGATATTACTTAGAACACCAATTGCGAAGGCAGGTTACCATGATTTAACTGACGCTGAGGGACGAAAGCGTG  
GGGAG

>ASV:1601:Species:burkinensis

TACGTAGGTGGCAAGCGTTGTCCGGAATTATTGGGCGTAAAGCGCGCAGGCGGGATCAAGTCTGTCTTAAAAGTGC  
GAGGCTCAACCTCGTAGAGGGACAGAACTGGTATTCTTGAGTGTGCGAGAGGAAAGTGAATTCCAAGTGTAGCGGTGA  
AATGCGTAGAGATTTGAAGAACACCAGTGGCGAAGGCGACTTCTGGACGATGTCTGACGCTGAGGCGGAAAGCTAGG  
GGAGC

>ASV:1602:Genus:Bacteroides

TACGGAGGATCCGAGCGTTATCCGGATTTATTGGGTTAAAGGGAGCGTAGATGGGTTGTTAAGTCAGTGTGAAAGTTT  
GCGGCTCAACCGTAAAATTGCAGTTGAAACTGGCAGTCTTGAGTACAGTAGAGGTGGGCGGAATTCCTAGTGTAGCGGTG  
AAATGCGTAGATATTAGGAGGAACACCAGTGGCGAAGGCGGCTTACTGGACGTTAAGTACGCTTGGGCTCGAAAGCGTG  
GGGAG

>ASV:1603:Genus:Oscillospira

TACGTAGGTGGCAAGCGTTGTCCGGAATTACTGGGTGTAAGGGCGTGTAGCGGGTGGCAAGTCAGATGTGAAATCTG  
GAGGCTCAACCTCCAACTGCATTTGAAACTGTTGATCTTGAGTATCGGAGAGGTAATCGGAATTCCTAGTGTAGCGGTG  
AAATGCGTAGATATTAGGAGGAACACCAGTGGCGAAGGCGGATTACTGGACGACAACGACGCTGAGGCGGAAAGCGTG  
GGGAG

>ASV:1604:Species:glucerasea

TACGTAGGGGGCAAGCGTTATCCGGATTTACTGGGTGTAAGGGAGCGTAGACGGAGCAGCAAGTCTGATGTGAAAGGCA  
GGGGCTCAACCCCTGGACTGCATTGAAACTGTTGATCTTGAGTACCGGAGAGGTAAGCGGAATTCCTAGTGTAGCGGTG  
AAATGCGTAGATATTAGGAGGAACACCAGTGGCGAAGGCGGCTTACTGGACGTTAAGTACGCTTGGGCTCGAAAGCGTG  
GGGAG

>ASV:1605:Genus:Parasutterella

TACGTAGGGTGCGAGCGTTAATCGGAATTACTGGGCGTAAAGGGTGCAGGCGGTTGAGTAAGACAGATGTGAAATCCC  
CGAGCTTAACCTCGGAATGGCATATGTGACTGCTCGACTAGAGTGTGTCAGAGGGAGGTGGAATTCACGCTGTAGCAGTG  
AAATGCGTAGATATGTGGAAGAACACCAGTGGCGAAGGCGGCTCCTGGGACATGACTGACGCTCAGGCACGAAAGCGTG  
GGGAG

>ASV:1606:Genus:Actinobacillus

TACGGAGGGTGCGAGCGTTAATCGGAATAACTGGGCGTAAAGGGCACGAGGCGGTGACTTAAGTGAGGTGTGAAAGGCC  
CGGGCTTAACCTGGGAATTGCATTTACTACTGGGTCGCTAGAGTACTTTAGGGAGGGGTAGAATTCACGCTGTAGCGGTG  
AAATGCGTAGAGATGTGGAGGAATACCGAAGGCGAAGGCGGCTTACTGGGAAATGACTGACGCTCATGTGCGAAAGCGTG  
GGGAG

>ASV:1607:Family:Ruminococcaceae

TACGTAGGTGGCAAGCGTTGTCCGGAATTACTGGGTGTAAGGGTGCAGGCGGGACTGCAAGTTGGATGTGAAATACC  
GGGGCTTAACCCGGAGCTGCATCCAAAACCTGATGTTCTTGAGTGAAGTAGAGGTAAGCGGAATTCAGTGTAGCGGTG  
AAATGCGTAGATATTGAGGAGGAACACCAGTGGCGAAGGCGGCTTACTGGGCTTTAACTGACGCTGAGGCACGAAAGCATG  
GGTAG

>ASV:1608:Family:Lachnospiraceae

TACGTATGGAGCAAGCGTTATCCGGATTTACTGGGTGTAAGGGGAGCGTAGACGGTTTGGCAAGTCTGATGTGAAATTT  
AGGGCTTAACCTGAACCTGCATTGAAACTGTCGGACTAGAGTGTGCGGAGAGGTGAGTGAATTCCTAGTGTAGCGGTG  
AAATGCGTAGATATTAGGAGGAACACCAGTGGCGAAGGCGGCTACTGGACGATAACTGACGCTTGGGCTCGAAAGCGTG  
GGGAG

>ASV:1609:Species:adhaesivum/goesingense

TACGAAGGGGGCTAGCGTTGCTCGGAATCACTGGGCGTAAAGGGCGCGTAGGCGGCCATTCAAGTGGGGGTGAAAGCCT  
GTGGCTCAACCACAGAAATTGCCCTTCGATACTGTTGGCTTGGTTGGTAGAGGTTGGTGAAGTGCAGTGTAGAGGTG  
AAATTCGTAGATATTCGCAAGAACACCAGTGGCGAAGGCGGCAACTGGACCAATACTGACGCTGAGGCGGAAAGCGTG  
GGGAG

>ASV:1610:Family:Erysipelotrichaceae

TACGTAGGTGGCAAGCGTTATCCGGATTTACTGGGCGTAAAGGGTGCAGGCGGTTTGGCAAGTCTGATGTGAAATTT  
ATGGCTCAACCTGTAAGCTATGAAACTGGTATGCTAGAGTGCAGAAAGAGGGCGATGGAATTCATGTGTAGCGGTAA  
AATGCGTAGATATTGAGGAGGAACACCAGTGGCGAAGGCGGCTCGCTGGTCTGTAAGTACACTGAGGACGAAAGCGTG  
GGAGC

>ASV:1611:Genus:Ruminiclostridium\_5

TACGTAGGGAGCGAGCGTTGTCCGGAATTACTGGGTGTAAGGGTGCAGGCGGATAGGCAAGTCAGTGGTGAATCTA  
TGGGCTTAACCCATAAAGCTGCACTGAAACTGTTTATCTTGAGTGGAGTAGAGGCGAGGCGGAATTCCTGGTGTAGCGGTG  
AAATGCGTAGAGATCGGGAGGAACACCAGTGGCGAAGGCGGCTGCTGGGCTTTAACTGACGCTGAGGCACGAAAGTGTG  
GGTAG

>ASV:1612:Family:Lachnospiraceae

TACGTAGGGGGCAAGCGTTATCCGGATTTACTGGGTGTAAGGGGAGCGCAGACGGAATGGCAAGTCTGATGTGAAAGGCC

GGGGCTCAACCCCGGACTGCATTGAAACTGTCAATCTAGAGTACCGAGGGGTAAGTGAATTCCTAGTGTAGCGGTG  
AAATGCGTAGATATTAGGAGGAACACCAGTGGCGAAGGCGGCTTACTGGACGGTAACGACGTTGAGGCTCGAAAGCGTG  
GGGAG  
>ASV:1613:Genus:Roseburia  
TACGTATGGTGAAGCGTTATCCGGATTTACTGGGTGTAAGGGAGCGCAGGCGCAAGGCTAAGTCTGATGTGAAAGCCC  
GGGGCTCAACCCCGGTACTGCATTGAAACTGGTCATCTAGAGTGTCTGGAGGGTAAGTGAATTCCTAGTGTAGCGGTG  
AAATGCGTAGATATTAGGAGGAACACCAGTGGCGAAGGCGGCTTACTGGACGATAACTGACGCTGAGGCTCGAAAGCGTG  
GGGAG  
>ASV:1614:Family:Lachnospiraceae  
TACGTAGGGGGCAAGCGTTATCCGGATTTACTGGGTGTAAGGGAGCGTAGGTGGTAGTCAAGTCAGAAGTAAAACCC  
AAGGCTTAACCATGGGATTGCTTTTGAAGTGCATAACTAGAGTGTCTGGAGAGGTAAGTGAATTCCTAGTGTAGCGGTG  
AAATGCGTAGATATTAGGAGGAACACCAGTGGCGAAGGCGGCTTACTGGACGATAACTGACACTGAGGCTCGAAAGCGTG  
GGGAG  
>ASV:1615:Genus:Lactobacillus  
TACGTAGGTGGCAAGCGTTGTCCGGATTTATTGGGCGTAAAGCGAGTGCAGGCGGTTGATAAGTCTGATGTGAAAGCCT  
TCGGCTCAACCCGAGAAATTGCATCAGAAACTGTCTGAGCTTGTAGTACAGAAGAGGAGAGTGGAACTCCATGTGTAGCGGTG  
AAATGCGTAGATATATGGAAGAACACCAGTGGCGAAGGCGGCTCTCTGGTCTGTTACTGACGCTGAGGCTCGAAAGCATG  
GGTAG  
>ASV:1616:Genus:Bifidobacterium  
TATGTAGGGCGCAAGCGTTATCCGGATTTATTGGGCGTAAAGGGCTCGTAGGCGGCTCGTCGCGTCCGGTGTGAAAGTCC  
ATCGCTTAACCGTGGATCTGCGCCGGGTACGGGCGGCTGGAGTGCAGTGGAGGAGACTGGAATTCCTGGTGTAAACCGGTG  
GAATGTGTAGATATCGGAAGAACACCAGTGGCGAAGGCGGCTCTCTGGCCGCTACTGACGCTGAGGAGCGAAAGCGTG  
GGGAG  
>ASV:1617:Genus:Akkermansia  
TACAGAGGTCTCAAGCGTTGTTCGGAATCGCTGGGCGTAAAGCGTGCCTAGGCTGTTTCGTAAGTCTGTGTGAAAGGCG  
CGGGCTCAACCCGCGGACGGACATGATACTGCGAGACTAGAGTAATGGAGGGGAACCGGAATTCCTGGTGTAGCAGTG  
AAATGCGTAGATATCGAGAGGAACACTCGTGGCGAAGGCGGTTCTTGACATTAACGACGCTGAGGCACGAAGGCCAG  
GGGAG  
>ASV:1618:Genus:Coprococcus\_2  
TACGTATGGTGAAGCGTTATCCGGATTTACTGGGTGTAAGGGTGCCTAGGTGGCAAGGCAAGTCTGAAGTAAAATCC  
GGGGCTCAACCCGGAAGTGTCTTGGAAACTGTTTAGCTAGAGTACAGGAGAGGTAAGTGAATTCCTAGTGTAGCGGTG  
AAATGCGTAGATATTAGGAGGAACACCAGTGGCGAAGGCGGCTTACTGGACGGTAACGACGTTGAGGCTCGAAAGCGTG  
GGGAG  
>ASV:1619:Genus:Sphingomonas  
TACGAGGGGAGCTAGCGTTGTTCGGAATTAAGGCGTAAAGCGCACGTAAGGCGGCTTTGTAAGTAAAGGGTGAAGGCC  
AGAGCTCAACTCTGGAATTGCTTTTAGACTGCATCGCTTGAATCCAGGAGAGGTGAGTGGAAATTCGAGTGTAGAGGTG  
AAATTCGTAGATATTCGGAAGAACACCAGTGGCGAAGGCGGCTCACTGGACTGGTACTGACGCTGAGGTGCGAAAGCGTG  
GGGAG  
>ASV:1620:Genus:Parabacteroides  
TACGGAGGATGCGAGCGTTATCCGGATTTATTGGGTTAAAGGGTGCCTAGGTGGCTTATTAAGTCAAGCGGTGAAAGTTT  
GTGGCTTAACCATAAAATTGCCGTTGAAACTGGTTAGCTTGAATTAAGTGTAGGCGGAATGCGTGGTGTAGCGGTG  
AAATGCATAGATATCACGCAGAACTCCGATTGCGAAGGCGAGCTTACTAACTATAACTGACACTGAAGCACGAAAGCGTG  
GGGAT  
>ASV:1621:Order:Mollicutes\_RF39  
TACGTAGGGAGCGAGCGTTATCCGGATTTATTGGGTGTAAGGGTGCCTAGGCGGTTTATTAGTCTATGGTTAATTC  
GAAGCTTAACCTCGGTTCCCATAGAAACCGATTTACTTGTAGTATGGTAGAGGCAAGTGGAAATTCCTAGTGTAGCGGTAA  
AATGCGTAGATATTAGAAGGAACACCAGTGGCGAAGGCGACTTGTCTGGCCATCACTGACGCTGAGGCACGAAAGCGTG  
GGAGC  
>ASV:1622:Genus:GCA-900066755  
TACGTATGGAGCAAGCGTTATCCGGATTTACTGGGTGTAAGGGAGCGTAGGCGGTTATGCAAGTCCGATGTGAAAGCCC  
GGGGCTTAACCCGGGACTGCATTAGAAACTGTGTAAGTACTAGAGTGTCTGGAGAGGTAAGTGGAAATTCCTAGTGTAGCGGTG  
AAATGCGTAGATATTAGGAGGAACACCAGTGGCGAAGGCGGCTTACTGGACGATAACTGACGCTGAGGCTCGAAAGCGTG  
GGGAG  
>ASV:1623:Species:acidophilus/casei/crispatus/gallinarum/helveticus/kitasatonis  
TACGTAGGTGGCAAGCGTTGTCCGGATTTATTGGGCGTAAAGCGAGCGCAGGCGGAAGAATAAGTCTGATGTGAAAGCCC  
TCGGCTTAACCGAGGAAGTGCATCGGAAACTGTTTTCTTGTAGTGCAGAAGAGGAGAGTGGAACTCCATGTGTAGCGGTG  
GAATGCGTAGATATATGGAAGAACACCAGTGGCGAAGGCGGCTCTCTGGTCTGCAACTGACGCTGAGGCTCGAAAGCATG  
GGTAG  
>ASV:1624:Order:Bacteroidales  
TACGGAGGATGCAAGCGTTATCCGGATTTATTGGGTTAAAGGGTGCCTAGGCGGAATTCAGTCAAGCGGTGAAATCTC  
CATGCTCAACATGGACTGCCGTTGAAACTGGCGTTCTAGAGTGTAAATGAGGTAGGCGGAATGCGTGGTGTAGCGGTG  
AAATGCATAGATATCACGCAGAACTCCGATTGCGAAGGCGAGCTGCTGGGATACAACGACTGACGCTGAGGCACGAAAGCGTG  
GGTAT  
>ASV:1625:Genus:Ruminococcaceae\_UCG-010  
TACGTAGGTGGCGAGCGTTATCCGGATTTACTGGGTGTAAGGGTGTGTAGGCGGATTTCAAGTCAAGTGTGAAAATTA  
CGGGCTCAACCCGTAACCTGCATTTGAAACTGAGGTTCTTGTAGAGTGGAGAGGTAAGTGGAAATTCCTGGTGTAGCGGTG  
AAATGCGTAGATATCGGGAGGAACACCAGTGGCGAAGGCGATTTACTGGACGACAACGACGCTGAGACACGAAAGCGTG  
GGGAG



>ASV:1626:Genus:Clostridium\_sensu\_stricto\_1  
TACGTAGGTGGCGAGCGTTGTCCGGATTTACTGGGCGTAAAGGGAGCGTAGGCTGATTTTTAAGTGAGATGTGAAATACT  
CGGGCTTAACCTGAGTGCTGCATTTCAAACCTGGAAGTCTAGAGTGCAGGAGAGGAGAAGGGAATTCCTAGTGTAGCGGTG  
AAATGCGTAGATATTAGGAAGAACACCACTGGCGAAGGCGCTTCTCTGGACTGTAAC TGACGCTGAGGCTCGAAAGCGTG  
GGGAG

>ASV:1627:Genus:Ruminococcaceae\_UCG-005  
TACGTAGGTGGCAAGCGTTGTCCGGATTTACTGGGTGTAAGGGCGTGTAGGCGGAGATGCAAGTCAGAAGTAAATCCA  
TGGGCTTAACCATGAAGTGCATTTGAAACTGTATCCCTTGAGTATCGGAGAGGCAGGCGGAATTCCTAGTGTAGCGGTG  
AAATGCGTAGATATTAGGAAGAACACCACTGGCGAAGGCGGCTGCTGGACGACAACTGACGCTGAGGCGCAAAGCGTG  
GGGAG

>ASV:1628:Genus:Bilophila  
TACGGAGGTGCAAGCGTTAATCGGAATCACTGGGCGTAAAGCGCACGTAGGCGGCTGGTAAGTCAGGGGTGAAATCCC  
ACAGCCCAACTGTGGAAGTGCCTTTGATACTGCCAGGCTTGTAGTACCGGAGAGGGTGGCGGAATTCAGGTGTAGGAGTG  
AAATCCGTAGATATCTGGAGGAACACCGGTGGCGAAGGCAGCCACTGGACGGTAAC TGACGCTGAGGTGCGAAAGCGTG  
GGTAG

>ASV:1629:Genus:Catenibacterium  
TACGTAGGTGGCGAGCGTTATCCGGAATCATTGGGCGTAAAGGGAGCAGGCGGCGCAAGGGTCTGTGGTAAAAGACC  
GAGGCTAAACTTCGGTAAGCCATGAAACCGGGCGCTAGAGTGCAGGAGAGGATCGTGGAATTCATGTGTAGCGGTG  
AATGCGTAGATATATTAGGAAGAACACCACTGGCGAAGGCGATGGTCTGGGCGCAACTGACGCTCATTCCGAAAGCGTG  
GGAGC

>ASV:1630:Genus:Anaeroglobus  
TACGTAGGTGGCAAGCGTTGTCCGGAATGATTGGGCGTAAAGGGCGCGCAGGCGGCGCAAGTCTGTCTAAAAGTGC  
GGGCTTAACCCGTGAGGGGAGAGAACTGGTTGGCTGAGAGTATCGGAGAGGAAAGCGGAATTCCTAGTGTAGCGGTG  
AAATGCGTAGATATTAGGAAGAACACCGGTGGCGAAGGCGCTTCTGGACGACAACTGACGCTGAGGCGCAAAGCCAG  
GGGAG

>ASV:1631:Genus:Thermicanus  
TACGTAGGGGGCGAGCGTTGTCCGGAATGATTGGGCGTAAAGCGCGCAGGCGGCTCTTTAAGTCTGATGTAAAAGCCC  
GCGGCTTAACCCGGAAGTGCATTTGAAACTGGGGGACTTGGGCTAGGAGAGGGAAGTGAATTCCTGGTGTAGCGGTG  
AAATGCGTAGATCAGGAGGAATACCGATGGCGAAGCAACTTCTGGCTAGAACTGACGCTGATGCGCAAAGCGTG  
GGGAG

>ASV:1632:Genus:Ruminococcaceae\_UCG-010  
TACGTAGGTGGCGAGCGTTATCCGGAATTAAGGGTGTGTAGGCGGACTGCAAGTCAGATGTGAAAATTA  
CGGGCTCAACTCGTAAAGTGCATTTGAAACTGTGGTCTTGAGAGCCGAGGGGTAATGGAATTCCTAGTGTAGCGGTG  
AAATGCGTAGATATTGGGAGGAACACCACTGGCGAAGGCGATTTACTGGACGCAACTGACGCTGAGACACGAAAGTGTG  
GGGAG

>ASV:1633:Genus:Subdoligranulum  
AACGTAGGGTGCAGCGTTGTTCGGAATTAAGGGTGTAAAGGGAGCGCAGGCGGACCGGAAGTTGGAAGTAAAACCTA  
TGGGCTCAACCCATAAATTGCTTTCAAACCTGCTGGCCTTGTAGTGTGACAGGTTAGGTGGAATTCCTGGTGTAGCGGTG  
GAATGCGTAGATATCGGAGGAACACCACTGGCGAAGGCGACTTACTGGCACCAACTGACGCTGAGGCTCGAAAGCATG  
GGTAG

>ASV:1634:Genus:Ruminococcaceae\_UCG-014  
TACGTAGGGAGCAAGCGTTATCCGGATTTATTGGGTGTAAAGGGTGCCTAGACGGGAATGCAAGTTGGTTGTGAAATCCC  
TCGGCTCAACCGAGGAATTGCAACCAAACCTATATTTCTTGAGTGTGGAGAGGAAAGTGAATTCCTAGTGTAGCGGTG  
AAATGCGTAGATATTAGGAAGAACACCACTGGCGAAGGCGACTTCTGGACAGTAACTGACGTTGAGGCACGAAAGTGTG  
GGGAG

>ASV:1635:Genus:Blautia  
TACGTAGGGGGCAAGCGTTATCCGGATTTACTGGGTGTAAGGGAGCGTAGACGGAACGCAAGTCTGATGTGAAAGGCA  
TGGGCTCAACCTGTGGACTGCATTGGAACCTGTTGGTCTTGAGTACCGGAGGGGTAAGCGGAATTCCTAGTGTAGCGGTG  
AAATGCGTAGATATTAGGAAGAACACCACTGGCGAAGGCGGCTTACTGGACGGTAAC TGACGTTGAGGCTCGAAAGCGTG  
GGGAG

>ASV:1636:Genus:Blautia  
TACGTAGGGGGCAAGCGTTATCCGGATTTACTGGGTGTAAGGGAGCGTAGACGGAAGTCTGATGTGAAAGGCG  
GGGCTCAACCCCTGGACTGCATTGGAACCTGTTAGTCTTGAGTGCCGAGAGGTAAGCGGAATTCCTAGTGTAGCGGTG  
AAATGCGTAGATATTAGGAAGAACACCACTGGCGAAGGCGGCTTACTGGACGGTAAC TGACGTTGAGACTCGAAAGCGTG  
GGGAG

>ASV:1637:Genus:Parabacteroides  
TACGGAGGATCCGAGCGTTATCCGGATTTATTGGGTTAAAGGGTGCCTAGGCGGCTTTTAAGTCAGCGGTGAAAGTCT  
GTGGCTCAACCATAGAATTGCCGTTGAAACTGGAGGGCTTGTAGTATGTTTGGGCGAGGCGGAATGCGTGGTGTAGCGGTG  
AAATGCTTAGATATCACGCAGAACCCGATGGCGAAGGCGACTTCCGCAAGCCATGACTGACGCTGATGCACGAAAGCGTG  
GGGAT

>ASV:1638:Genus:Parabacteroides  
TACGGAGGATCCGAGCGTTATCCGGATTTATTGGGTTAAAGGGTGCCTAGGCGGCTTTTAAGTCAGCGGTGAAAGTCT  
GTGGCTCAACCATAGAATTGCCGTTGAAACTGGGGGCTTGTAGTATGTTTGGGCGAGGCGGAATGCGTGGTGTAGCGGTG  
AAATGCTTAGATATCACGCAGAACCCGATGGCGAAGGCGACTTCTGGACTGTAAC TGACGCTGATGCTCGAAAGTGTG  
GGTAT

>ASV:1639:Family:Actinomycetaceae  
TACGTAGGGCGCAGCGTTGTCCGGAATTAAGGGTGCCTAGGCGGCTTGTGCGCTGCTGCTGTGAAAACGC  
GGGCTTAACCCGCGCTGCAGTGGTACGGGCGAGCTAGAGTGTGGTAGGGGTGACTGGAATTCCTGGTGTAGCGGTG

GAATGCGAGATATCAGGAGGAACACCGATGGCGAAGGCAGGTCCTGGGCCATTACTGACGCTGAGGAGCGAAAGCATG  
GGGAG  
>ASV:1640:Genus:Lachnospira  
TACGTATGGAGCAAGCGTTATCCGGATTTACTGGGTGTAAGGGAGGTAGGTGGCCATGCAAGTCAGAAGTAAAATCC  
GGGGCTCAACCCGGAAGTCTTTTGAAGCTGAAGGCTAGAGTGCAGGAGGGGTGAGTGAATTCTAGTGTAGCGGTG  
AAATGCGTAGATATTAGGAGGAACACCAAGTGGCGAAGGCGGCTCGCTGGACTGTAAGTACACTGAGGCTCGAAAGCGTG  
GGGAG  
>ASV:1641:Family:Enterobacteriaceae  
TACGGAGGGTCAAGCGTTAATCGGAATTACTGGGCGTAAAGCGCACGCAGGCGGTCTGTCAAGTCCGATGTGAAATCCC  
CGGGCTCAACCTGGGAAGTGCATTGAAACTGGCAGGCTAGAGTCTTGTAGAGGGGGTGAATTCCAGGTGTAGCGGTG  
AAATGCGTAGAGATCTGGAGGAATACCGTGGCGAAGGCGGCCCTGGACAAAGACTGACGCTCAGGTGCGAAAGCGTG  
GGGAG  
>ASV:1642:Genus:Roseburia  
TACGTATGGTCAAGTGTTATCCGGATTTACTGGGTGTAAGGGAGCGCAGGCGGTACGGCAAGTCTGATGTGAAAGCCC  
GGGGCTCAACCTGGTACTGCATTGAAACTGTCCGACTAGAGTGTCCGAGGGGTAAAGTGAATTCTAGTGTAGCGGTG  
AAATGCGTAGATATTAGGAGGAACACCAAGTGGCGAAGGCGGCTTACTGGACGATTACTGACGCTGAGGCTCGAAAGCGTG  
GGGAG  
>ASV:1643:Family:Lachnospiraceae  
TACGTATGGTCAAGCGTTATCCGGATTTACTGGGTGTAAGGGAGCGTAGACGGATGGGCAAGTCTGATGTGAAACCCC  
GGGGCTCAACCCGGGACTGCATTGAAACTGTTTACTAGAGTGTCCGAGAGGTAAGTGAATTCTAGTGTAGCGGTG  
AAATGCGTAGATATTAGGAGGAACACCAAGTGGCGAAGGCGGCTTACTGGACAGTAAGTACGCTTGGGCTCGAAAGCGTG  
GGGAG  
>ASV:1644:Genus:GCA-900066225  
TACGTAGGTAGCGAGCGTTGTCCGGAATTACTGGGTGTAAGGGAGCGTAGGCGGGATTGCAAGTTGAATGTCAAATCTA  
CGGGCTTAACCCGATAGCCGCTTCAAAGTGCAGTCTTGTAGTGAAGTAGAGGCAGGCGGAATTCTAGTGTAGCGGTGA  
AATGCGTAAATATTAGGAGGAACACCAAGTGGCGAAGGCGGCTTACTGGGCTTTAACTGACGCTGAGGCTCGAAAGCGTG  
GTAGC  
>ASV:1645:Genus:Ruminococcus\_2  
TACGTAGGGAGCAAGCGTTATCCGGATTTACTGGGTGTAAGGGTGCCTAGGCGGCTTGGTAAGTCAAGTGTGAAATGTA  
TGGGCTCAACCCATGCACTGCATTTGAAACTATTGAGCTTGAAGTAGAGGTAGGCGGAATTCCCTGTGTAGCGGTG  
AAATGCGTAGAGATAGGAGGAACACCAAGTGGCGAAGGCGGCTTACTGGGCTTTAACTGACGCTGAGGCGCAAAAGCGTG  
GGTAG  
>ASV:1646:Genus:Lachnospiraceae\_NK4A136\_group  
TACGTAGGGGGCAAGCGTTATCCGGATTTACTGGGTGTAAGGGAGCGTAGATGGTTTTGCAAGTCTGAAGTAAAGCCC  
GGGGCTTAACCCGGGACTGCTTTGAAACTGTAGAAGTGCAGGAGAGGTAAGTGAATTCTAGTGTAGCGGTG  
AAATGCGTAGATATTAGGAGGAACACCAAGTGGCGAAGGCGGCTTACTGGACTGTAAGTACGCTTGGGCTCGAAAGCGTG  
GGGAG  
>ASV:1647:Genus:Ruminococcaceae\_UCG-013  
TACGTAGGTGGCAAGCGTTGTCCGATTTACTGGGTGTAAGGGCGGTAGGCGGGTGTAGTAAAGTCAAGTGTGAAATACC  
GGGGCTCAACCCGGGCTGCATTTGAAACTGCAAATCTTGAAGTGTCCGAGAGGAAAGCGGAATTCTAGTGTAGCGGTG  
AAATGCGTAGATATTAGGAGGAACACCGTGGCGAAGGCGGCTTCTGGACAGTAAGTACGCTGAGGCGCAAAAGCGTG  
GGGAG  
>ASV:1648:Genus:Bacteroides  
TACGGAGGATCCGAGCGTTATCCGGATTTATTGGGTTAAAGGGAGCGTAGATGGGTTGTTAAGTCAAGTGTGAAAGTTT  
GCGGCTCAACCCGTAATTTGCAATTTGATACTGGCGTCTTGAAGTACAGTTGAGGTGGGCGGAATTTGTGGTGTAGCGGTG  
AAATGCTTAGATATCACGAAGAACTCTATTGCGAAGGCAGCTCACTAACTGCAACTGACATTGAGGCTCGAAAGTGTG  
GGTAT  
>ASV:1649:Genus:Ruminiclostridium\_1  
TACGTAGGTGGCAAGCGTTGTCCGGATTTACTGGGTGTAAGGGCGCGTAGGCGGGTCTGCAAGTCAAGTGTGAAATACC  
GAGGCTTAACCTCGGAAGTGCATCTGAAACTGTGGATCTTGAAGTACTGGAGAGGAAAGTGAATTCTAGTGTAGCGGTG  
AAATGCGTAGATATTAGGAGGAACACCGTGGCGAAGGCGGCTTCTGGACAGTAAGTACGCTGAGGCGCAAAAGCGTG  
GGGAG  
>ASV:1650:Genus:Fusobacterium  
TACGTATGTCGCAAGCGTTATCCGGATTTATTGGGCGTAAAGCGCGTCTAGGCGGCTTAGTAAAGTCTGATGTGAAAATGC  
GGGGCTCAACCCGATTTGCGTTGGAAACTGTAAACTAGAGTACTGGAGAGGTAGGTGGAAGTACAAGTGTAGAGGTGA  
AATTCGTAGATATTGTAGGAATGCCGATGGGGAAGCCAGCTACTGGACAGATACTGACGCTAAAGCGCGAAAGCGGTG  
GTAGC  
>ASV:1651:Order:Rhizobiales  
TACGAAGGGGCTAGCGTTGTTCCGGAATTACTGGGCGTAAAGCGCGCTAGGCGGACCATTAAGTCAAGGTTGAAATCCC  
AGGGCTCAACCTGGAAGTGCCTTTGATACTGGAGGTCTGGAGTTCGGGAGAGGTGAGTGAATTCCGAGTGTAGAGGTG  
AATTCGTAGATATTGAGGAGGAACACCAAGGCGAAGGCGGCTCACTGGCCCCGATACTGACGCTGAGGCGCAAAAGCGTG  
GGGAG  
>ASV:1652:Species:uniformis  
TACGGAGGATCCGAGCGTTATCCGGATTTATTGGGTTAAAGGGAGCGTAGGCGGACGCTTAAAGTCAAGTGTGAAAGTTT  
GCGGCTCAACCCGTAATTTGCAAGTGTGATACTGGGTGTCTTGAAGTATAGTAGAGGCAGGCGGAATTCGTGGTGTAGCGGTG  
AAATGCTTAGATATCACGAAGAACTCCGATTTGCGAAGGCAGCTTGTCTGGACTGTAAGTACGCTGATGCTCGAAAGTGTG  
GGTAT  
>ASV:1653:Order:Mollicutes\_RF39

TACGTAGGGGACAAGCGTTATCCGGATTTATTGGGCGTAAAGCGTGCCTAGGCGGCATATTAAGTTTAAAGATAAAAGCCC  
GGGGCTTAACTCCGGTTCTGCTTAAAAAAGTATAAGCTTGTAGTGTGGTAGAGGTAATGGAATTTCTAGTGTAGCGGTGA  
AATGCGTAGATATTAGAAGGAACACCCAGTGGCGAAGGCGATTACTGGGCCACAACCTGACGCTGAGGCACGAAAGCGTGG  
GTAGC  
>ASV:1654:Family:Ruminococcaceae  
TACGTAGGGAGCGAGCGTTGTCCGGATTTACTGGGTGTAAAGGGTGCCTAGGCGGGATGGCAAGTCAGATGTGAAATACC  
GGGGCTCAACCCCGGGCTGCATTTGAAACTGTCTTCTTGTAGTGAAGTAGAGGCGAGCGGAATTCCTAGTGTAGCGGTG  
AATGCGTAGATATTAGGAGGAACACCCAGTGGCGAAGGCGGCTGCTGGCTTTAACTGACGCTGAGGCACGAAAGCATG  
GGGAG  
>ASV:1655:Family:Lachnospiraceae  
TACGTATGGTCAAGCGTTATCCGGATTTACTGGGTGTAAAGGGAGCGTAGACGGATAGGCAAGTCTGGAGTGAAAGCCC  
GGGGCTCAACCCCGGGACTGCTTTGAAACTGTTTATCTAGAGTGTGGAGAGGCAAGTGGAAATTCCTAGTGTAGCGGTG  
AATGCGTAGATATTAGGAGGAACACCCAGTGGCGAAGGCGGCTTGTGGACAGTAACCTGACGCTGAGGCACGAAAGCGTG  
GGGAG  
>ASV:1656:Genus:Pedobacter  
TACGGAGGATCAAGCGTTATCCGGATTTATTGGGTTTAAAGGGTGCCTAGGCGGCCTGTTAAGTCAGAGGTGAAAGACG  
GTAGCTCAACTATCGCAGTGCCTTTGATACTGATGGCTTGAATGACTAGAGGTAGGCGGAATGAGACAAGTAGCGGTG  
AATGCGTAGATATGCTCAGAACACCCGATTGCGAAGGCGAGTTACTATGGTTTTATTGACGCTGAGGCACGAAAGCGTG  
GGGAT  
>ASV:1657:Species:prevotii/tetradius  
TACGTAAAGTCCGAGCGTTGTCCGGAATCATTGGGCGTAAAGGGTACGTAGGCGGATAAGCAAGTTAGAAGTGAAATCCT  
ATAGCTCAACTATAGTAAGCTTTTAAAACTGCTCATCTTGGATGATGGAAGGAAAGTGGAAATTCCTAGTGTAGCGGTG  
AATGCGCAGATATTAGGAGGAATACCCGGTGGCGAAGGCGACTTTCTGGCCATAAACTGACGCTGAGGTACGAAAGCGTGG  
GTAGC  
>ASV:1658:Genus:Lachnospiraceae\_UCG-008  
TACGTAGGGGGCAAGCGTTATCCGGATTTACTGGGTGTAAAGGGAGCGCAGGTGGTATGGCAAGTCAGAAGTGAAAACCC  
GAGGCTCAACCACGGGATTGCTTTTAAACTGTTAACTAGAGTGCAGGAGGGGCGAGCGGAATTCCTGGTGTAGCGGTG  
AATGCGTAGATATCAGGAGGAACACCCGGTGGCGAAGGCGGCTGCTGGACTGTAACCTGACACTGAGGCTCGAAAGCGTG  
GGGAG  
>ASV:1659:Order:Clostridiales  
TACGTAGGGGGCAAGCGTTATCCGGAATTACTGGGTGTAAAGGGTGCCTAGGCGGCCCGGCAAGTTTGTATGTGAAACCCA  
TAGGCTTAACTGTGGCATGCATCAAAAACCTACCAGCTAGAGTGCAGGAGAGGAAAGCGGAATTCCTAGTGTAGCGGTG  
AATGCGTAGATATTAGGAAGAACACCCAGTGGCGAAGGCGGCTTCTGGACTGCAACTGACGCTGAAGCACGAAAGCGTG  
GGGAG  
>ASV:1660:Family:Peptococcaceae  
TACGTAGGGGGCGAGCGTTGTCCGGAATCACTGGGCGTAAAGGGCGCGTAGGCGGCAATATAAGTCAGATGTGAAAGGTG  
AGGGCTCAACCCTTAGACTGCATCTGATACTGTATAGCTTGTAGTGTGAGAGAGGAAAGCGGAATTCCTAGTGTAGCGGTG  
AATGCGTAGATATTAGGAGGAACACCCAGTGGCGAAGGCGGCTTCTGGCTCATAACTGACGCTGAGGCACGAAAGCGTG  
GGGAG  
>ASV:1661:Genus:Bacteroides  
TACGGAGGATTCGAGCGTTATCCGGATTTATTGGGTTTAAAGGGAGCGTAGGCGGGTTGTTAAGTCAGTTGTGAAAGTTT  
GCGGCTCAACCCTTAGACTGCATCTGATACTGTATAGCTTGTAGTGTGCAACAGAGGTAGGCGGAATTCCTAGTGTAGCGGTG  
AATGCTTAGATATCAGGAAGAACTCCGATTGCGAAGGCGAGTTACTGGATTGTAACCTGACGCTGATGCTCGAAAGGTG  
GGTAT  
>ASV:1662:Genus:UBA1819  
AACGTAGGGTGCAGGCGTTGTCCGGAATTACTGGGTGTAAAGGGAGCGCAGGCGGATTGGCAAGTTGGGAGTGAAATCTA  
TGGGCTCAACCCTTAGACTGCATCTGATACTGTATAGCTTGTAGTGTGAGAGAGGAAAGTGGAAATTCCTAGTGTAGCGGTG  
GAATGCGTAGATATCGGAGGAACACCCAGTGGCGAAGGCGGCTTACTGGGCACTAACTGACGCTGAGGCTCGAAAGCATG  
GGTAG  
>ASV:1663:Species:magna  
TACGTATGGAGCGAGCGTTGTCCGGAATTATTGGGCGTAAAGGGTACGACGCGGTTTAAATAAGTCGAATGTTAAAGATC  
GGGGCTCAACCCTTAGACTGCATCTGATACTGTATAGCTTGTAGTGTGAGAGAGGAAAGTGGAAATTCCTAGTGTAGTGGTGA  
AATACGTAGATATTAGGAGGAATACCCAGTAGCGAAGGCGACTTTCTGGACACAACTGACGCTGAGGTACGAAAGCGTGG  
GGAGC  
>ASV:1664:Species:glycolicus/othiniensis  
TACGTAGGGGGCTAGCGTTATCCGGATTTACTGGGCGTAAAGGGTGCCTAGGTTGGTTTCTTAAAGTCAGGAGTGAAAGGCT  
ACGGCTTAACTTAGTAAAGCTTGTAAACTGGGAACTTGTAGTGTGAGAGAGGAAAGTGGAAATTCCTAGTGTAGCGGTG  
AATGCGTAGATATTAGGAGGAACACCCAGTAGCGAAGGCGGCTTCTGGACTGTAACCTGACACTGAGGCACGAAAGCGTGG  
GGAGC  
>ASV:1665:Genus:Corynebacterium  
TACGTAGGGTGCAGCGTTGTCCGGAATTACTGGGCGTAAAGAGCTCGTAGGTTGGTTTGTGCGCTGCTGTGAAATTC  
GGGGCTTAACTTCCGGCGTGCAGGCGATACAGGCATAACTTGTAGTGTGAGGGGAGACTGGAATTCCTGGTGTAGCGGT  
GGAATGCGCAGATATCAGGAGGAACACCCGATGGCGAAGGCGAGTCTGTTGGGCACTAACTGACGCTGAGGAGCGAAAGCAT  
GGGGA  
>ASV:1666:Genus:Ruminococcaceae\_UCG-014  
TACGTAGGGAGCAAGCGTTATCCGGATTTATTGGGTGTAAAGGGTGCCTAGACGGGAGAGCAAGTTGGTTGTGAAATCCC  
TCGGCTTAACTGAGGAACTGCAACCAAACTACTATTTCTTGTAGTGTGGAGAGGAAAGTGGAAATTCCTAGTGTAGCGGTG  
AATGCGTAGATATTAGGAGGAACACCCAGTGGCGAAGGCGACTTTCTGGACAGTAACCTGACGTTGAGGCACGAAAGGTG

GGGAG

>ASV:1667:Genus:Fournierella

AACGTAGGTGGCAAGCGTTGTCCGGAATTACTGGGTGTAAGGGAGCGCAGGCGGATTGCAAGTTGGAAGTAAAACCA  
TGGGCTCAACCCATGGACTGCTTTCAAACCTGCAGATCTTGAGTGGTGTAGAGGTAGCGGAAATCCCGGTGTAGCGGTG  
GAATGCGTAGATATCGGGAGGAACACCAGTGGCGAAGGCGGCTACTGGGCACTAACTGACGCTGAGGCTCGAAAGCATG  
GGTAG

>ASV:1668:Genus:Streptococcus

TACGTAGGTCCGAGCGTTGTCCGGAATTACTGGGCGTAAAGCGAGCGCAGGCGGTTTGATAAGTCTGAAGTTAAAGGCT  
GTGGCTCAACCATAGTTTCGCTTGGAAACTGTCAAACCTTGAGTGCAGAAAGGGAGAGTGAATTCATGTGTAGCGGTGA  
AATGCGTAGATATGAGGAAACACCGGTGGCGAAAGCGGCTCTCTGGTCTGTAAGTACGCTGAGGCTCGAAAGCGTGG  
GGAGC

>ASV:1669:Genus:Subdoligranulum

AACGTAGGGTGCAGCGTTGTCCGGAATTACTGGGTGTAAGGGAGCGCAGGCGGACCGGCAAGTTGGAAGTAAAACCA  
TGGGCTCAACCCATAAATTGCTTTCAAACCTGCTGGCCTTGAGTGGTGCAGAGGTAGGTGGAATTCGCGGTGTAGCGGTG  
GAATGCGTAGATATCGGGAGGAACACCAGTGGCGAAGGCGACCTACTGGGCACTAACTGACGCTGAGGCTCGAAAGCATG  
GGTAG

>ASV:1670:Genus:Alloprevotella

TACGGAAGGTTCAAGCGTTATCCGGATTTATTGGGTTAAAGGGAGCGCAGGCGGACCTTTAAGTACGCTGTGAAATACG  
GCGGCTCAACCGTGAAGTGCAGTTGATACTGGAGGCTTGAGTGCACACAGGGATACTGGAATTCATGGTGTAGCGGTG  
AATGCTCAGATATCATGAAGAACTCAATCGCGAAGGCAGGTATCCGGGGTCAACTGACGCTGAGGCTCGAAAGTGGC  
GGTAT

>ASV:1671:Genus:Ruminococcus\_1

TACGTAGGGAGCGAGCGTTGTCCGGAATTACTGGGTGTAAGGGAGCGTAGGCGGGATTGCAAGTACAGTGTGAAAACCA  
TGGGCTTAAACCCATAAAGTGCATTTGAAACTGTGGTCTTGAGTGAAGTAGAGGTAAGCGGAAATTCCTAGTGTAGCGGTG  
AATGCGTAGATATTAGGAGGAACATCAGTGGCGAAGGCGGCTACTGGGCTTAACTGACGCTGAGGCTCGAAAGCGTG  
GGGAG

>ASV:1672:Species:celticus

TACAGAGGGTGCAGCGTTAATCCGGATTTACTGGGCGTAAAGCGTGCAGTGGTGGTCTTTAAGTCCGATGTGAAATCCC  
TGAGCTTAACTAGGAATTGCATTGATACTGGGAGACTAGAGTATGGGAGAGGATGGTAGAATTCAGGTGTAGCGGTG  
AATGCGTAGAGATCTGGAGGAATACCGATGGCGAAGGCAGCCATCTGGCCTAATACTGACACTGAGGCACGAAAGCATG  
GGGAG

>ASV:1673:Genus:Bacteroides

TACGGAAGGATGCAGCGTTATCCGGATTTATTGGGTTAAAGGGAGCGCAGACGGGACTTTAAGTACGCTGTGAAATTTT  
CCGGCTCAACTGGGAAACTGCAGTTGATACTGGGCTCCTTGAGTACGGTGCAGGCAGGCGGAAATTCGTGGTGTAGCGGTG  
AATGCTTAGATATACGAAGAACCCGATTGCGAAGGCAGCCTGCCAGACCCTAACTGACGCTCATGCTCGAAAGTGGC  
GGTAT

>ASV:1674:Genus:Blautia

TACGTAGGGGGCAAGCGTTATCCGATTTACTGGGTGTAAGGGAGCGTAGACGGTGTGGCAAGTCTGATGTGAAAGGCA  
TGGGCTCAACCTGTGGACTGCATTGAAACTGTCATACTTGAGTGCCGGAGGGTAAGCGGAAATTCCTAGTGTAGCGGTG  
AATGCGTAGATATTAGGAGGAACACCAGTGGCGAAGGCGGCTACTGGACGGTAACTGACGTTGAGGCTCGAAAGCGTG  
GGGAG

>ASV:1675:Species:intestinihominis

TACGGAAGGATGCAGCGTTATCCGGATTTATTGGGTTAAAGGGTGCAGTGGGCGCACGCCAAGTACGCGGTGAAATTTT  
CGGGCTCAACCCGAGTGTCCGTTGAAACTGGCGAGCTAGAGTGCACAAGAGGCAGGCGGAAATGCGTGGTGTAGCGGTG  
AATGCTAGATATACGCGAGAACCCGATTGCGAAGGCAGCCTGCTAGGGTGAACAGACGCTGAGGCACGAAAGCGTG  
GGTAT

>ASV:1676:Genus:Subdoligranulum

AACGTAGGGTGCAGCGTTGTCCGGAATTACTGGGTGTAAGGGAGCGCAGGCGGACCGGCAAGTTGGAAGTAAAACCA  
TGGGCTCAACCCATAAATTGCTTTCAAACCTGCTGGCCTTGAGTAGTGCAGAGGTAGGTGGAATTCGCGGTGTAGCGGTG  
GAATGCGTAGATATCGGGAGGAACACCAGTGGCGAAGGCGGCTACTGGGCACTAACTGACGCTGAGGCTCGAAAGCATG  
GGTAG

>ASV:1677:Family:Ruminococcaceae

TACGTAGGGAGCAAGCGTTGTCCGGAATTACTGGGTGTAAGGGAGCGTAGGCGGGAACGCAAGTTGGAAGTAAAAGGCA  
TGGGCTCAACCCATGGAATGCTTTCAAACCTGTGTTCTTGAGTGAAGTAGAGGCAGGCGGAAATTCCTAGTGTAGCGGTG  
AATGCGTAGATATTAGGAGGAACACCAGTGGCGAAGGCGGCTGCTGGGCTTAACTGACGCTGAGGCTCGAAAGCGTG  
GGTAG

>ASV:1678:Genus:GCA-900066575

TACGTAGGGGGCAAGCGTTATCCGGATTTACTGGGTGTAAGGGAGCGTAGGCGGCGATGCAAGTCAAGTGAAGGCC  
AGGGCTTAAACCGTGGGACTGCTTTGAAACTGTGTTGCTGGATTGCCGGAGAGGTAAGTGAATTCCTAGTGTAGCGGTG  
AATGCGTAGATATTAGGAGGAACACCAGTGGCGAAGGCGGCTACTGGACGGTGAATGACGCTGAGGCTCGAAAGCGTG  
GGGAG

>ASV:1679:Species:maltophilia

TACGAAGGGTGCAGCGTTACTCGGAATTACTGGGCGTAAAGCGTGCAGTGGTGGTCTTTAAGTCTGTTGTGAAAGCCC  
TGGGCTCAACCTGGGAACTGCAGTGGAAACTGGACACTAGAGTGTGGTAGAGGGTAGCGGAAATTCCTGGTGTAGCAGTG  
AATGCGTAGAGATCAGGAGGAACATCCATGGCGAAGGCAGCTACCTGGACCAACACTGACACTGAGGCACGAAAGCGTG  
GGGAG

>ASV:1680:Genus:Family\_XIII\_AD3011\_group

TACGTAGGGGGCAAGCGTTATCCGGATTTATTGGGCGTAAAGAGTACGTAGGTGGTTACCTAAGCACAGGTATAAGGCA

ATGGCTCAACCATTGTTTCGCTTGTGAACTGGGTTGCTTGTAGTGCAGGAGAGAAAGCGGAATTCCTAGTGTAGCGGTGA  
AATGCGTAGATATTAGGAGGAACACCAAGTGGCGAAGGCGGCTTTCTGGACTGTAACCTGACACTGAGGTACGAAAAGCGTGG  
GGAG

>ASV:1681:Genus:Ruminiclostridium\_9

TACGTAGGTGGCAAGCGTTATCCGGATTTACTGGGTGTAAGGGCGGTGAGGCGGGAGTGAAGTCAGATGTGAAAACCTA  
TGGGCTCAACCCATAGCCTGCATTTGAAACTGCATTTCTTGTAGTACTGGAGAGGCAGACGGAATTCCTAGTGTAGCGGTG  
AAATGCGTAGATATTAGGAGGAACACCAAGTGGCGAAGGCGGTCTGCTGGACAGCAACTGACGCTGAGGCGCGAAAAGCGTG  
GGGAG

>ASV:1682:Genus:Blautia

TACGTAGGGGGCAAGCGTTATCCGGATTTACTGGGTGTAAGGGAGCGTAGACGGTGTGGCAAGTCTGATGTGAAAAGACA  
TGGGCTCAACCTGTGGACTGCATTGAAACTGTCATACCTTGTAGTGCCGGAGGGTAAGCGGAATTCCTAGTGTAGCGGTG  
AAATGCGTAGATATTAGGAGGAACACCAAGTGGCGAAGGCGGCTTACTGGACGGTAACGACGTTGAGGCTCGAAAAGCGTG  
GGGAG

>ASV:1683:Family:Lachnospiraceae

TACGTAGGGGGCGAGCGTTATCCGGATTTACTGGGTGTAAGGGAGCGTAGACGGCATGGCAAGCCAGATGTGAAAAGCCC  
GGGGCTCAACCCCGGACTGCATTTGAAACTGTCAGGCTAGAGTGTGCGAGAGGAAAGCGGAATTCCTAGTGTAGCGGTG  
AAATGCGTAGATATTAGGAGGAACACCAAGTGGCGAAGGCGGCTTTCTGGACGATGACTGACGTTGAGGCTCGAAAAGCGTG  
GGGAG

>ASV:1684:Order:Mollicutes\_RF39

TACGTAGGGAGCGAGCGTTATCCGGATTCATTGGGTGTAAGCGTGTGTAGGCGGTTTCTTAAGTCAGTAGTCTAAGCCT  
GGAGCTTAACTCCAGTTCGCTACTGAAACTGAGTTACTTGTAGTATGGTAGAGGCAAGTGAATTTCTAGTGTAGCGGTGG  
AATGCGTAGATATTAGAAGGAACACCAAGTGGCGAAGGCGGCTTGTGGGCCATCACTGACGCTGAGACACGAAAAGCGTGG  
GGAG

>ASV:1685:Genus:Hydrogenophaga

TACGTAGGGTGCAGCGTTAATCGGAATTACTGGGCGTAAAGCGTGCAGGCGGTTTTGTAAGACAGGTGTGAAATCCC  
CGGGCTCAACCTGGGAATGGCGTTGTGACTGCAAAGCTGGAGTGCAGGAGAGGGGGATGGAATTCGCGTGTAGCAGTG  
AAATGCGTAGATATCGGAGGAACACCGATGGCGAAGGCAATCCCCTGGGCTGCACTGACGCTCATGCACGAAAAGCGTG  
GGGAG

>ASV:1686:Family:Muribaculaceae

TACGGAGGATGCGAGCGTTATCCGGATTTATTGGGTTTAAAGGGTGCCTAGGCGGGATATCAAGTCAGCGGTAAAAATTC  
GGGGCTCAACCCCGTGCCTGTTGAAACTGGTTTCTTGTAGTGAGCGAGAAGTATGCGGAATGCGTGGTGTAGCGGTGA  
AATGCATAGATATCACGCAAACTCCGATTGCGAAGGCGAGCATGCCGGCGCTCAACTGACGCTGAAGCACGAAAAGCGTGG  
GTATC

>ASV:1687:Family:Peptostreptococcaceae

TACGTAGGGGGCTAGCGTTATCCGGAATTACTGGGCGTAAAGGGTGCCTAGGCGGTTTCAAGTCAGAAGTAAAAGGCT  
ACGGCTCAACCGTAGTAAGCTTTTGAAGCTGTAAGACTTGTAGTGCAGGAGAGGAGAGTGAATTCCTAGTGTAGCGGTGA  
AATGCGTAGATATTAGGAGGAACACCAAGTGGCGAAGGCGGCTCTCTGGACTGTAACCTGACGCTGAGGACGAAAAGCGTGG  
GGAG

>ASV:1688:Genus:Dorea

TACGTAGGGGGCAAGCGTTATCCGGATTTACTGGGTGTAAGGGAGCGTAGACGGTGTGCAAGTCTGAAGTAAAAGACA  
TGGGCTCAACCTGTGGACTGCTTTGAAACTGTGCAGCTAGAGTGTGCGAGAGGTAAGTGAATTCCTAGTGTAGCGGTG  
AAATGCGTAGATATTAGGAGGAACACCAAGTGGCGAAGGCGGCTTACTGGACGATGACTGACGTTGAGGCTCGAAAAGCGTG  
GGGAG

>ASV:1689:Family:Family\_XIII

TACGTAGGGGGCAAGCGTTATCCGGAATTATTGGGCGTAAAGAGTGCCTAGGTGGCACCTTAAAGCGCAGGGTTTAAAGGCA  
ATGGCTCAACCATTTGTCCTGCGAAGTGGGGGCTTGTAGTGCAGGAGAGGAAAGCGGAATTCCTAGTGTAGCGGTGA  
AATGCGTAGATATTAGGAGGAACACCAAGTGGCGAAGGCGGCTTTCTGGACTGTAACCTGACACTGAGGACGAAAAGCGTGG  
GGAG

>ASV:1690:Genus:Ruminococcaceae\_NK4A214\_group

TACGTAGGTGGCGAGCGTTATCCGGATTTACTGGGTGTAAGGGCGCGTAGGCGGGAATGCAAGTCAGATGTGAAAATCCA  
AGGGCTCAACCTTGAAGTGCATTTGAAACTGATTTCTTGTAGTGTGCGAGAGGTTGACGGAATTCCTAGTGTAGCGGTG  
AAATGCGTAGATATTAGGAGGAACACCAAGTGGCGAAGGCGGCTTACTGGACGATAACTTACGCTGAGGCGCGAAAAGCGTG  
GGGAG

>ASV:1691:Family:Lachnospiraceae

TACGTATGGTGAAGCGTTATCCGGATTTACTGGGTGTAAGGGAGCGTAGACGGATGGGCAAGTCTGATGTGAAAACCC  
GGGGCTCAACCCCGGACTGCATTGAAACTGTTTACTTAGAGTGTGCGAGAGGTAAGTGAATTCCTAGTGTAGCGGTG  
AAATGCGTAGATATTAGGAGGAACACCAAGTGGCGAAGGCGGCTTACTGGACAGTAACGACGTTGAGGGTCTGAAAAGCGTG  
GGGAG

>ASV:1692:Genus:Ruminococcaceae\_UCG-009

TACGTAGGTGGCGAGCGTTATCCGGATTTACTGGGTGTAAGGGCGAGTAGGCGGGATTGCAAGTCAGATGTGAAAACCTA  
TGGGCTCAACCCATAGACTGCATTTGAAACTGTATTTCTTGTAGTGTGCGAGAGGTAAGTGAATTCCTAGTGTAGCGGTG  
GAATGCGTAGATATCGGAGGAACACCAAGTGGCGAAGGCGGCTTCTGGACATTAACCTGACGCTGAGGCGCGAAAAGCGTG  
GGGAG

>ASV:1693:Genus:Bifidobacterium

TACGTAGGGTGAAGCGTTATCCGGAATTATTGGGCGTAAAGGGCTCGTAGGCGGTTCTGTCGCGTCTGGTGTGAAAAGTCC  
ATCGCTTAAACGGTGGATCCGCGCGGCTTGTAGTGCCTAGGGAGACTGGAATTCCTAGTGTAGCGGTG  
GAATGTGTAGATATCGGGAAGAACCAATGGCGAAGGCGGCTTCTGGCCGTTACTGACGCTGAGGAGCGAAAAGCGTG  
GGGAG

>ASV:1694:Genus:Ruminococcaceae\_UCG-005  
TACGTAGGTGGCAAGCGTTGTCCGGATTTACTGGGTGTATAGGGCGTGTAGGCGGAGAAGCAAGTCAGAAGTGAATCCA  
TGGGCTTAACCCATGAAGTGTCTTTGAAACTGTTTCCCTTGAGTATCGGAGAGGCAGGCGGAATTCCTAGTGTAGCGGTG  
AAATGCGTAGATATTAGGAGGAACACCAGTGGCGAAGGCGGCTTCTGGACGACAACGACGCTGAGGCGCAAAGCGTG  
GGGAG

>ASV:1695:Genus:Actinobacillus  
TACGGGGGTGCGAGCGTTAATCGGAATAACTGGGCGTAAAGGGCACGCAGGCGGTGACTTAAGTGAGATGTGAAAGCCC  
CGGGCTTAACCTCGGTAATGCAATTCATAACTGGTCTAGAGTACTTTAGGGAGGGGTAGAATTCACGCTGTAGCGGTG  
AAATGCGTAGAGATGTGGAGGAATACCGAAGGCGAAGGCGAGCCCTTGGGAATGTAAGTACTGACGCTCATGTGCGAAAGCGTG  
GGGAG

>ASV:1696:Genus:Ruminococcus\_2  
TACGTAGGGAGCAAGCGTTGTCCGGATTTACTGGGTGTAAAGGGTGCCTAGGCGGCTTTGCAAGTCAGATGTGAAATCTA  
TGGGCTCAACCCATAAAGTGTATTTGAAACTGTAGAGCTTGTAGTGAAGTAGAGGCAGGCGGAATTCCTAGTGTAGCGGTG  
AAATGCGTAGAGATGGGAGGAACACCAGTGGCGAAGGCGGCTTCTGGGCTTTAACTGACGCTGAGGCACGAAAGCGTA  
GGTAG

>ASV:1697:Order:Molicutes\_RF39  
TACGTAGGGAGCAAGCGTTATCCGGATTTATTGGGCGTAAAGGGTGCCTAGGCGGCTTGTAAAGTATGAGATTAAGCCC  
GAGGCTTAACCTCGGTTTCGTTTCAATAAAGTGGCAGGCTTGTAGTGTGGCAGAGGTAAACGGAATTCCTAGTGTAGCGGTG  
AATGCGTAGATATTAGAAGGAACACCAGTGGCGAAGGCGGTTTACTGGGCTAACTGACGCTGAGGCACGAAAGCGTGG  
GGAGC

>ASV:1698:Genus:Erysipelatoclostridium  
TACGTAGGTGGCAAGCGTTATCCGGATTTATTGGGCGTAAAGGGAGCAGGCGGAGCAAGGGTCTGTGGTGAAGACT  
GAAGCTTAACCTCAGTAAGCCATAGAAACCGGGCAGCTAGAGTGCAGGAGAGGATCGTGAATTCATGTGTAGCGGTG  
AATGCGTAGATATTAGGAGGAACACCAGTGGCGAAGGCGGATCTGGCCTGTAAGTACTGACGCTCAGTCCGAAAGCGTGG  
GGAGC

>ASV:1699:Genus:Ruminiclostridium\_6  
TATGTAGGTGGCAAGCGTTGTCCGGATTTACTGGGTGTAAAGGGAGTGTAGGCGGATATCAAGTCAGAAGTGAATTA  
CGGGCTCAACCCGTAACCTGCTTTGAAACTGACTTCTTGTAGTGAAGTAGAGGCAAGCGGAATTCCTAGTGTAGCGGTG  
AAATGCGTAGATATTAGGAGGAACACCAGTGGCGAAGGCGGCTTCTGGGCTTTTACTGACGCTGAGGCTCGAAAGCGTG  
GGGAG

>ASV:1700:Genus:Lachnospiraceae\_UCG-009  
TACGTAGGGGGCAAGCGTTATCCGGATTTACTGGGTGTAAAGGGAGCGTAGACGGCATGGCAAGTCTGATGTGAAAACCT  
GGGGCTCAACCCCAAGACTGCATTGGAAGTGTAAAGCTTAGAGTGCAGGAGAGGTAAGCGGAATTCCTAGTGTAGCGGTG  
AAATGCGTAGATATTAGGAGGAACACCAGTGGCGAAGGCGGCTTACTGGACTGTAAGTACTGACGTTGAGGCTCGAAAGCGTG  
GGGAG

>ASV:1701:Family:Lachnospiraceae  
TACGTATGGTGCAAGCGTTATCCGGATTTACTGGGTGTAAAGGGAGCGTAGACGGATAAGCAAGTCTGAAGTGAAGGCC  
GGGGCTCAACCCCGGACTGCTTTGGAAGTGTAACTTAGAGTGTGGAGAGGTAAGTGAATTCCTAGTGTAGCGGTG  
AAATGCGTAGATATTAGGAGGAACACCAGTGGCGAAGGCGGCTTACTGGACAGTACTGACGTTGAGGCTCGAAAGCGTG  
GGGAG

>ASV:1702:Genus:Faecalibacterium  
AACGTAGGTCAAGCGTTGTCCGGATTTACTGGGTGTAAAGGGAGCGCAGGCGGGAAGACAAGTTGGAAGTGAATCCA  
TGGGCTCAACCCATGAAGTGTCTTTCAAAGTGTCTTTCTTGTAGTGTGAGAGGTAAGGCGGAATTCCTAGTGTAGCGGTG  
GAATGCGTAGATATTAGGAGGAACACCAGTGGCGAAGGCGGCTTACTGGGACCAACTGACGCTAAGGCTCGAAAGTGTG  
GGTAG

>ASV:1703:Species:gracilis  
TACGGAGGGTGAAGCGTTACTCGGAATCACTGGGCGTAAAGGACGCGTAGGCGGATTAAGTCTCTTGTGAAATCTA  
ACGGCTTAACCGTTAAAGTGTCTTTGGAAGTGTAACTTAGAGTAAAGGAGAGGCAGATGGAATTCCTGGTGTAGGGGTA  
AAATCGTAGATATTCAAGAAGAATACCTATTGCGAAGGCGATCTGCTGGAACTTAACTGACGCTAATGCGTGAAGCGTG  
GGGAG

>ASV:1704:Family:Lachnospiraceae  
TACGTAGGGGGCAAGCGTTATCCGGATTTACTGGGTGTAAAGGGAGCGTAGACGGCATGGCAAGCCAGATGTGAAAGCCC  
GGGGCTCAACCCCGGACTGCAATTTGGAAGTGTCAAGCTAGAGTGTGGAGAGGAAAGCGGAATTCCTAGTGTAGCGGTG  
AAATGCGTAGATATTAGGAGGAACACCAGTGGCGAAGGCGGCTTCTGGACGATGACTGACGTTGAGGCTCGAAAGCGTG  
GGGAG

>ASV:1705:Species:coli  
TACGGAGGGTGAAGCGTTAATCGGAATTAAGTGGGCGTAAAGGCGCACGCAGGCGGTTTGTAAAGTCAAGTGTGAAATCCC  
CGGGCTCAACCTGGGAAGTGCATCTGATACTGGCAAGCTTGTAGTCTCGTAGAGGGGGCAGAAATTCAGGTGTAGCGGTG  
AAATGCGTAGAGATCTGGAGGAATACCGTGGCGAAGGCGGCCCCCTGGACGAAGACTGACGCTCAGGTGCGAAAGCGTG  
GGGAG

>ASV:1706:Genus:Subdoligranulum  
AACGTAGGGTGAAGCGTTGTCCGGATTTACTGGGTGTAAAGGGAGCGCAGGCGGACCGGAAGTTGGAAGTGAAGTGA  
TGGGCTCAACCCATAAATGCTTTCAAAGTGTGGCCTTGTAGTGTGAGAGGTAGGTGGAATTCCTAGTGTAGCGGTG  
GAATGCGTAGATATTAGGAGGAACACCAGTGGCGAAGGCGGCTTACTGGGCGCAACTGACGCTGAGGCTCGAAAGCATG  
GGTAG

>ASV:1707:Genus:Ruminococcaceae\_UCG-013  
TACGTAGGTGACAAGCGTTGTCCGGATTTACTGGGTGTAAAGGGCGGCTAGGCGGACTGTCAAGTCAAGTGTGAAATACA  
GGGGCTTAACCCCGGGCTGCGATTGAAACTGACAGCCTTGTAGTATCGGAGAGGAAAGCGGAATTCCTAGTGTAGCGGTG

AAATGCGTAGATATTAGGAGGAACACCAGTGGCGAAGGCGGCTTTCTGGACGACAACGACGCTGAGGCGCGAAAGTGTG  
GGGAG  
>ASV:1708:Species:stercorihominis  
TACGTAGGGAGCAAGCGTTGTCCGGATTCAGTGGGCGTAAAGAGCACGTAGGCGGTTAATTAAGTCAGGTGTGAAAGTTT  
TCGGCTCAACCGGAAAAGTGCACCTGAAACTGAATACTTGAGTATCGGAGAGGTAAGCGGAATTCCTAGTGTAGCGGTG  
AAATGCGTAGAGATTAGGAAGAACACCAGTGGCGAAGGCGGCTTACTGGACGATAACTGACGCTGAGGTGCGAAAAGCGTG  
GGGAG  
>ASV:1709:Genus:Tepidimonas  
TACGTAGGGTGCAGCGTTAATCGGAATTACTGGCCGTAAAGCGTGCAGGCGGTTCTGTAAGACAGAGGTGAAATCCC  
TGGGCTCAACCTAGGAATGGCCTTTGTGACTGCAAGGCTGGAGTGCAGGAGGGGATGGAATTCGCGTGTAGCAGTG  
AAATGCGTAGATATGCGGAGGAACACCAGTGGCGAAGGCAGTCCCCTGGGCTGCACGACGCTCATGCACGAAAGCGTG  
GGGAG  
>ASV:1710:Species:aureus  
TACGTAGGTGGCAAGCGTTATCCGGAATTATTGGGCGTAAAGCGCGGTAGGCGGTTTTTAAGTCTGATGTGAAAGCCC  
ACGGCTCAACCGTGGAGGGTATTGAAACTGAAAACCTTGAGTGCAGAAGAGGAAAGTGAATTCATGTGTAGCGGTG  
AAATGCGCAGAGATATGGAGGAACACCAGTGGCGAAGGCGACTTTCTGGTCTGTAACGACGCTGATGTGTGAAAGCGTG  
GGGAT  
>ASV:1711:Genus:Hungatella  
TACGTAGGGGGCAAGCGTTATCCGATTTACTGGGTGTAAGGGAGCGTAGACGTTTAGCAAGTCTGAAGTGAAGGCC  
GGGGCTCAACCCGGTACTGCTTTGAAACTGTTGGACTTGAGTGCAGGAGAGTAAGTGAATTCCTAGTGTAGCGGTG  
AAATGCGTAGATATTAGGAGGAACACCAGTGGCGAAGGCGGCTTACTGGACTGTAACGACGTTGAGGCTCGAAAGCGTG  
GGGAG  
>ASV:1712:Genus:Coprococcus\_3  
TACGTATGGTGAAGCGTTATCCGATTTACTGGGTGTAAGGGAGCGCAGACGGCTGTGTAAGTCTGAAGTGAAGGCC  
GGGGCTCAACCCGGGACTGCTTTGAAACTATGCAGCTAGAGTGTGCGAGAGGTAAGCGGAATTCCTAGTGTAGCGGTG  
AAATGCGTAGATATTGGAGGAACACCAGTGGCGAAGGCGGCTTACTGGACGATGACTGACGTTGAGGCTCGAAAGCGTG  
GGGAG  
>ASV:1713:Genus:Oscillibacter  
TACGTAGGTGGCAAGCGTTGTCCGATTTACTGGGTGTAAGGGCGTGCAGCCGGCCGCAAGTCAGATGTGAAATCTG  
GAGGCTTAACCTCAAACCTGCATTTGAAACTGTTGGTCTTGAGTACCAGGAGAGATTATCGGAATTCCTGTGTAGCGGTG  
AAATGCGTAGATATAAGGAAGAACACCAGTGGCGAAGGCGGATAACTGGACGGCAACTGACGTTGAGGCGCGAAAGCGTG  
GGGAG  
>ASV:1714:Genus:Flavobacterium  
TACGGAGGATCAAGCGTTATCCGGAATCATTGGGTTAAAGGGTCCGTAGGCGGCTTATAAGTCAGCGGTGAAAGTTT  
TTGGCTTAACCAAAAATTGCCATTGATACTGTAGGCTTGAATGTTTGTGAAGTAAC TAGAATATGTAGTGTAGCGGTG  
AAATGCTTAGATATTACATGGAATACCAATTGCGAAGGCAGGTTACTAACAAATGATTGACGCTGATGGACGAAAGCGTG  
GGTAG  
>ASV:1715:Genus:Paludibacter  
TACGGAGGATCCGAGCGTTATCCGATTTATTGGGTTAAAGGGTGCAGTGGCGGATGGAAGTCAGCGGTGAAAGTTT  
GCAGCTTAACGTAAAATTGCCATTGAAACTGTCAGTCTTGAGTGCAAATGAGGTAGGCGGAATGTGTTGTGTAGCGGTG  
AAATGCGTAGATATAACACAGAACACCAATTGCGAAGGCAGCTTACTGGGATGCAACTGACGCTGAGGCACGAAAGCGTG  
GGGAT  
>ASV:1716:Family:Family\_XIII  
TACGTAGGGGGCAAGCGTTATCCGGAATTATTGGGCGTAAAGAGTATGTAGGTGGTTTCTTAAGCGCAGGGTATAAGGCA  
ATGGCTTAACCATTTGTCGCCGTGAACTGAGAGACTTGAGTGTGCGGAGAGGAAAGCGGAATTCCTAGTGTAGCGGTG  
AATGCGTAGATATTAGGAGGAACACCAGTGGCGAAGGCGGCTTTCTGGACAGTAACTGACACTGAGATACGAAAGCGTGG  
GGAG  
>ASV:1717:Family:Lachnospiraceae  
TACGTAGGGGGCAAGCGTTATCCGATTTACTGGGTGTAAGGGAGCGTAGACGGCATGGTAAGCCAGATGTGAAAGCCC  
GGGGCTCAACCCGGGACTGCATTTGAACTGTCAGGCTAGAGTGTGCGAGAGGAAAGCGGAATTCCTAGTGTAGCGGTG  
AAATGCGTAGATATTAGGAGGAACACCAGTGGCGAAGGCGGCTTTCTGGACGATGACTGACGTTGAGGCTCGAAAGCGTG  
GGGAG  
>ASV:1718:Family:Ruminococcaceae  
TACGTAGGTGGCGAGCGTTGTCCGGATTTACTGGGTGTAAGGGCGAGTAGGCGGGCTAACAAAGTCAGATGTGAAATACC  
GAGGCTCAACCTCGGGCTGCATTTGAAACTGTTAGTCTTGAGTGTGAGAGGCGAGGCGGAATTCCTAGTGTAGCGGTA  
AAATGCATAGAGATTGGGAGGAACACCAGTGGCGAAGGCGGCTGCTGGACATTAACGACGCTGAGGAGCGAAAGTGTG  
GGGAG  
>ASV:1719:Genus:Acidovorax  
TACGTAGGGTGCAGCGTTAATCGGGATTACTGGGCGTAAAGCGTGCAGGCGGTTATATAAGACAGATGTGAAATCCC  
CGGGCTCAACCTGGGAACTGCATTTGTGACTGTATAGCTAGAGTACGGCAGAGGGGGATGGAATTCGCGTGTAGCAGTG  
AAATGCGTAGATATGCGGAGGAACACCAGTGGCGAAGGCAATCCCCTGGGCTGTACTGACGCTCATGCACGAAAGCGTG  
GGGAG  
>ASV:1720:Genus:Bacteroides  
TACGGAGGATGCGAGGTTATCCGATTTATTGGGTTAAAGGGAGCGCAGACGGGTCGTTAAGTCAGCTGTGAAAGTTT  
GGGGCTCAACCTTAAAATTGCAGTTGATACTGGGCTCCTTGAGTGCAGGTTGAGGTGTGCGGAATTCGTGGTGTAGCGGTG  
AAATGCTAAGATATCACGAAGAACTCCGATTGCGAAGGCAGCACACTAATCCGTAACGACGTTTCATGCTCGAAAGTGTG  
GGTAT  
>ASV:1721:Genus:GCA-900066575

TACGTAGGGGGCAAGCGTTATCCGGATTTACTGGGTGTAAAGGGAGCGTAGGCGGTTTGACAAGTCAGAAGTGAAAGCCC  
GTGGCTCAACTGCGGGACTGCTTTTAAAAGTGTGAGACTGGATTGCAGGAGAGGTAAGCGGAATTCCTAGTGTAGCGGTG  
AAATGCGTAGATATTAGGAGGAACACCAGTGGCGAAGGCGGCTTACTGGACTGTAATGACGCTGAGGCTCGAAAGCGTG  
GGGAG

>ASV:1722:Family:Ruminococcaceae

TACGTAGGTGGCGAGCGTTGTCCGGAATTTACTGGGTGTAAAGGGAGCGTAGGCTGGAGGACAAGTTGGGTGTAAAACCTA  
TCGGCTTAACTGGTAGTGGCACTCAAACCTGTTCTTCTTGTAGTGAAGTAGAGGTAAGCGGAATTCCTAGTGTAGCGGTGA  
AATGCGTAAATATTAGGAGGAACACCAGTGGCGAAGGCGGCTTACTGGCTTTAACTGACGCTGAGGCTCGAAAGCGTGG  
GTAGC

>ASV:1723:Family:Lachnospiraceae

TACGTAGGGGGCAAGCGTTATCCGGATTTACTGGGTGTAAAGGGAGCGTAGACGGTGTGCAAGTCTGAAGTGAAGGCC  
GGGGCTCAACCCCGGACTGCTTTGAAAAGTGTGACTAGAGTGCAGGAGAGGTAAGTGAATTCCTAGTGTAGCGGTG  
AAATGCGTAGATATTAGGAGGAACACCAGTGGCGAAGGCGGCTTACTGGACTGTAACGACGCTTGGGCTCGAAAGCGTG  
GGGAG

>ASV:1724:Genus:Methanosphaera

CACCGCAGCTCAAGTGGTAGCTGTTTTATTGGGCCTAAAGCGTTCGTAGCCGTTTGATAAGTCTTTGGTGAAGCTT  
GTAGCTTAACTATAAGAATTGCTGAAGATACTGTGACTTGAAGTCGGGAGAGGTTAGAGGTAACCGGGTAGGGGT  
GAAATCCTATAATCCTGGGAGGACCACCTGTGGCGAAGGCGCTAACTGGAACGATCTTACGCGTGAGTAACGAAAGCCA  
GGGGC

>ASV:1725:Species:acidilactici/claussenii/pentosaceus

TACGTAGGTGGCAAGCGTTATCCGGATTTATTGGGCGTAAAGCGAGCGCAGGCGGCTTTTTAAGTCTAATGTGAAGCCT  
TCGGCTCAACCGAAGAAGTGCATTGAAAAGTGGGAGACTTGAAGTGCAGAAGAGGACAGTGAAGTCCATGTGTAGCGGTG  
AAATGCGTAGATATTAGGAGGAACACCAGTGGCGAAGGCGGCTGTCTGGTCTGTAACGACGCTGAGGCTCGAAAGCATG  
GGTAG

>ASV:1726:Genus:Faecalibacterium

AACGTAGGTCAACGCGTTGTCCGGAATTTACTGGGTGTAAAGGGAGCGCAGGCGGGAAAGCAAGTTGGAAGTGAATCCA  
TGGGCTCAACCCATGAAGTGTCTTCAAACCTGTTTTCTTGTAGTGTGACAGGTAAGCGGGAATTCCTGGTGTAGCGGTG  
GAATGCGTAGATATTAGGAGGAACACCAGTGGCGAAGGCGGCTTACTGGGCACCAACTGACGCTGAGGCTCGAAAGTGTG  
GGTAG

>ASV:1727:Family:Lachnospiraceae

TACGTAGGGGGCAAGCGTTATCCGGATTTACTGGGTGTAAAGGGAGCGTAGACGGGAGACAAGTCCGAAGTGAAGGCC  
GGGGCTCAACCCCGGACTGCTTTGAAAAGTGCCTTGTAGAGTGTGGAGAGGTAAGTGAATTCCTAGTGTAGCGGTG  
AAATGCGTAGATATTAGGAGGAACACCAGTGGCGAAGGCGGCTTACTGGACAGTAACTGACGTTGAGGCTCGAAAGCGTG  
GGGAG

>ASV:1728:Species:piriformis

TACGTAGGGGGCGAGCGTTATCCGGATTTACTGGGCGTAAAGCGCGCGTAGGCGTCCCTTCAAGCGGCACCGTCAAGCC  
GGGGCTCAACCCCGGAGCGGCGGAACTGGGGGATCGAGTGCAGTGGAGAGGTAAGTGAATTCCTGGTGTAGCGGTG  
AAATGCGCAGATATTAGGAGGAACACCAGTGGCGAAGGCGGCTTCTGGGCCGCACTGACGCTGAGGCGCAAGGCTGG  
GGGAG

>ASV:1729:Genus:Parabacteroides

TACGGAGGATGCGAGCGTTATCCGGATTTATTGGGTTAAAGGGTGCCTAGGTGGTTAATTAAGTCAAGCGGTGAAAGTTT  
GTGGCTCAACCATAAATTGCGTTGAAACTGGTTGACTTGTAGTATATTTGAGGTAGCGGAATGCGTGGTGTAGCGGTG  
AAATGCATAGATATCACGAGAACTACGATTGCGAAGGCGGCTTACTAACTATAACTGACACTGAAGCACGAAAGCGTG  
GGGAT

>ASV:1730:Genus:Oscillibacter

TACGTAGGTGGCAAGCGTTGTCCGATTTACTGGGTGTAAAGGGCGTGCAGCCGGGCTGGTAAGTCAAGTGTGAAATCCG  
TGGGCTTAACTCAACCCAGCACTTGAACCTGCTGGTCTTGTAGTACCAGGAGGTTATCGGAATTCCTGTGTAGCGGTG  
AAATGCGTAGATATAAGGAGAAACACCAGTGGCGAAGGCGGATAACTGGACGCAACTGACGCTGAGGCGCAAGGCGTG  
GGGAG

>ASV:1731:Genus:GCA-900066225

TACGTAGGTGGCAAGCGTTGTCCGGAATTTACTGGGTGTAAAGGGAGCGTAGGTTGGGATACAAGTTGAATGTTAAAACCTA  
TGGGCTCAACCCATAGTTGCGTTCAAACCTGATTTCTTGTAGTGAAGTAGAGGTAAGCGGAATTCCTAGTGTAGCGGTG  
AATGCGTAAATATTAGGAGGAACACCAGTGGCGAAGGCGGCTTACTGGCTTTAACTGACGCTGAGGCTCGAAAGCGTGG  
GTAGC

>ASV:1732:Family:Lachnospiraceae

TACGTATGGTCAAGCGTTATCCGGATTTACTGGGTGTAAAGGGAGCGTAGGTTGGTGCAGTCAAGTCAAGTGAAGGCC  
GGGGCTTAACTCGGGACTGCTTTTAAAAGTGTGACTAGAGTGCAGGAGAGGTAAGTGAATTCCTAGTGTAGCGGTG  
AAATGCGTAGATATTAGGAGGAACACCGGTGGCGAAGGCGGCTTACTGGACTGTAACGACACTGAGGCTCGAAAGCGTG  
GGGAG

>ASV:1733:Genus:Parabacteroides

TACGGAGGATCCGAGCGTTATCCGGATTTATTGGGTTAAAGGGTGCCTAGGCGGCTTTTTAAGTCAAGCGGTGAAAGTCT  
GTGGCTCAACCATAGAAATTGCGTTGAAACTGGGGGCTTGTAGTATGTTGAGGCGAGCGGAATTCGTGGTGTAGCGGTG  
AAATGCTTAGATATCACGAGAACTCCGATTGCGAAGGCGGCTTGTGGACTGTAACGACGCTGATGCTCGAAAGTGTG  
GGTAT

>ASV:1734:Genus:Staphylococcus

TACGTAGGTGGCAAGCGTTATCCGGAATTTATTGGGCGTAAAGCGCGCTAGGCGGTTTTTTAAGTCTGATGTGAAGCCC  
ACGGCTCAACCGTGGAGGCTATTGAAAAGTGGAAAACCTTGAAGTGCAGAAGAGGAAAGTGAATTCATGTGTAGCGGTG  
AAATGCGCAGAGATATTAGGAGGAACACCAGTGGCGAAGGCGACTTTCTGGTCTGTAACGACGCTGATGTGCAAGGCGTG



GGGAT

>ASV:1735:Genus:Faecalibacoccus

TACGTAGGTGGCGAGCGTTATCCGGAATGATTGGGCGTAAAAGGTGCGTAGGCGGTACGGTAAGTCTGTAGTAAAAGGCG  
GCAGCTCAACTGTCGTAGGCTATGGAACCTGTCGAACTAGAGTGCAGAAAGAGGGCGATGGAACCTCATGTGTAGCGGTAA  
AATGCGTAGATATATGGAAGAACACCAAGTGGCGAAGGCGGCTCGCTGGTCTGTAACGTACGCTGAAGCACGAAAGCGTGG  
GGAGC

>ASV:1736:Genus:S5-A14a

TACGTATGGGGCAAGCGTTATCCGGAATTATTGGGCGTAAAGAGTGCCTAGGTGGTGGCTTAAGCGCAGGGTTTAAAGCA  
ATGGCTTAACTATTGTTTCGCTTGCAGAACTGGGTCACTTGTAGTACAGGAGAGGAAAGCGGAATTCCTAGTGTAGCGGTGA  
AATGCATAGATATTAGGAGGAACACCGGTGGCGAAGGCGGCTTCTGGACTGCAACTGACACTGAGGCACGAAAGCGTGG  
GTAGC

>ASV:1737:Genus:Anaerostipes

TACGTAGGGGGCAAGCGTTATCCGGAATTACTGGGTGTAAGGGTGCCTAGGTGGTATGACAAGTCAGAAGTAAAACCC  
AGGGCTTAACTCTGGGACTGCTTTTAAAAGTGTGAGACTGGAGTGCAGGAGAGGTAAGCGGAATTCCTAGTGTAGCGGTG  
AAATGCGTAGATATTAGGAGGAATATCAGTGGCGAAGGCGGCTTACTGGACTGAAACTGACACTGAGGCACGAAAGCGTG  
GGGAG

>ASV:1738:Genus:Caulobacter

TACGAAGGGGGCTAACGTTGCTCGGAATTACTGGGCGTAAAGGGAGCGTAGGCGGACTGTTAAGTTAGAGGTAAAAGCC  
AGGGCTCAACCTTGAATTGCTTTGATACTGGCAGTCTTGTAGTACGGAAGAGGTATGTGGAACCTCCGAGTGTAGAGGTG  
AAATTCGTAGATATTCGGAAGAACACCAAGTGGCGAAGGCGACATACTGGTCCGTTACTGACGCTGAGGCTCGAAAGCGTG  
GGGAG

>ASV:1739:Family:Ruminococcaceae

TACGTAGGTGGCAAGCGTTGTCGGATTTACTGGGTGTAAGGGCGCGTAGGCGGGATGGCAAGTCAGATGTAAAATCCA  
TGGGCTCAACCCATGAACTGCATTTGAAACTGTTGTTCTTGTAGTATCGGAGAGGCAAGCGGAATTCCTAGTGTAGCGGTG  
AAATGCGTAGATATTAGGAGGAACACCAAGTGGCGAAGGCGGCTTGTGGACGACAACGACGCTGAGGCGCGAAAGCGTG  
GGGAG

>ASV:1740:Genus:Lachnospira

TACGTATGGAGCAAGCGTTATCCGGAATTACTGGGTGTAAGGGAGTGTAGGTGGCCAGGCAAGTCAGAAGTAAAAGCC  
AGGGCTCAACCCGGGACTGCTTTTAAAAGTGCAGGGCTAGAGTGCAGGAGGGGCAAGTGAATTCCTAGTGTAGCGGTG  
AAATGCGTAGATATTAGGAGGAACACCAAGTGGCGAAGGCGGCTTGTGGACTGTAACGACACTGAGGCTCGAAAGCGTG  
GGGAG

>ASV:1741:Genus:Defluviimonas

TACGGAGGGGGCTAGCGTTGTTCCGGAATTACTGGGCGTAAAGCGCACGTAGGCGGATCGGAAAGTTGGGGGTAAAATCCC  
GGGGCTCAACCTCGGAACTGCCTTCAAACCTACTGGTCTTGTAGTTCGAGAGAGGTGAGTGAATTCGAGTGTAGAGGTG  
AAATTCGTAGATATTCGGAGGAACACCAAGTGGCGAAGGCGGCTCACTGGCTCGATACTGACGCTGAGGTGCGAAAGCGTG  
GGGAG

>ASV:1742:Genus:Christensenellaceae\_R-7\_group

TACGTAGGGGGCAAGCGTTGTCGGAAATAATTGGGCGTAAAGGGCGCGTAGGCGGCTCGGTAAGTCTGGAGTAAAAGTCT  
TGCTTTTAAAGTGGGAATTGCTTTGGATACTGTCGGGCTTGTAGTGCAGGAGAGGTTAGTGAATTCAGTGTAGCGGTG  
AAATGCGTAGAGATTGGGAGGAACACCAAGTGGCGAAGGCGACTAACTGGACTGTAACGACGCTGAGGCGCGAAAGTGTG  
GGGAG

>ASV:1743:Species:mossii/oryzarvi

TACGGAGGATGCGAGCGTTATCCGGAATTTATTGGGTTTAAAGGGTGCAGGCGGGATTTTAAAGTCAGCGGTGAAATTTT  
CAGGCTCAACCTGAACACTGCCGTTGAAACTGGGATCTTGTAGTATGGATGAAGTAGGCGGAATTCGTTGTGTAGCGGTG  
ACATGCTTAGATATAACGAGGAACCTCCGATTGCGTAGGCAGCTTACTAAGCCATAACTGACGCTCAAGCACGAAAGCGTG  
GGGAT

>ASV:1744:Genus:Parabacteroides

TACGGAGGATCCGAGCGTTATCCGGAATTTATTGGGTTTAAAGGGTGCCTAGGTGGTAAATTAAGTCAGCGGTGAAAGTTT  
GTGGCTCAACCATAAAATTGCCGTTGAAACTGGTTGACTTGTAGTATATTTGAGGTAGGCGGAATGCGTGGTGTAGCGGTG  
AAATGCATAGATATACGCGAAGCTCAATTCGGAAGGCGAGCTTACTAAACTATAACTGACACTGAAGCACGAAAGCGTG  
GGGAT

>ASV:1745:Genus:Odoribacter

TACGGAGGATGCGAGCGTTATCCGGAATTTATTGGGTTTAAAGGGTGCCTAGGCGGTTTATTAAGTTAGTGGTTAAATATT  
TGAGCTAAACTCAATTTGCCATTAATACTGGTGAACCTGGAGTACAGACGAGGTAGGCGGAATAAGTTAAGTAGCGGTGA  
AATGCATAGATATAACTTAGAACTCCGATAGCGAAGGCGAGCTTACCAGACTGTAACGTACGCTGATGCACGAGAGCGTGG  
GTAGC

>ASV:1746:Genus:Catenibacterium

TACGTAGGTGGCGAGCGTTATCCGGAATCATTGGGCGTAAAGAGGGAGCAGGCGCCGCAAGGGTCTGTGGTAAAAGACC  
GAAGCTAAACTTCGGTAAGCCATGAAACCGGGCGGCTAGAGTGCAGGAGAGGATCGTGAATTCATGTGTAGCGGTGA  
AATGCGTAGATATATGAGGAACACCAAGTGGCGAAGGCGACGGTCTGGGCGCAACTGACGCTCATTCCGAAAGCGTGG  
GGAGC

>ASV:1747:Family:Family\_XIII

TACGTAGGGGGCAAGCGTTATCCGGAATTTATTGGGCGTAAAGAGTGCCTAGGTGGCTTTTTAAGCGCAGGGTTTAAAGCA  
ATGGCCCAACCATTTGTCGCCCTGCGAACTGAATAGCTTGTAGTGCAGGAGAGGAAAGCGGAATTCCTAGTGTAGCGGTGA  
AATGCGTAGATATTAGGAGGAACACCAAGTGGCGAAGGCGGCTTCTGGACTGTAACGTACACTGAGGCACGAAAGTGTGG  
GGAGC

>ASV:1748:Genus:Intestinimonas

TACGTAGGTGGCGAGCGTTATCCGGAATTTACTGGGTGTAAGGGCGGTAGGCGGGAAGGCAAGTCAGATGTAAAACCTA

TGGGCTCAACCCATAGCCTGCATTTGAAACTGTTTTCTTGAGTGCTGGAGAGGCAATCGGAATTCCTGTGTAGCGGTG  
AAATGCGTAGATATACGGAGGAACACCAGTGGCGAAGGCGGATTGCTGGACAGTAACTGACGCTGAGGCGCAAAGCGTG  
GGGAG

>ASV:1749:Family:Lachnospiraceae

TACGTAGGGGGCAAGCGTTATCCGGATTTACTGGGTGTAAGGGAGCGCAGGTGGCATGATAAGTCTGATGTGAAAACCC  
AAGGCTCAACCATGGGACTGCATTGAAACTGTCGTGCTGGAGTGTCTGGAGAGGTAAGCGGAATTCCTAGTGTAGCGGTG  
AAATGCGTAGATATTAGGAGGAACACCAGTGGCGAAGGCGGCTTACTGGACGATGACTGACGCTGAGGCTCGAAAGCGTG  
GGGAG

>ASV:1750:Genus:Lachnospiraceae\_UCG-004

TACGTAGGGGGCAAGCGTTATCCGGATTTACTGGGTGTAAGGGAGCGTAGACGGCGATGCAAGTCTGAAGTAAATACC  
CGGGCTTAACCTGGGAACTGCTTTGAAACTGTATGGCTAGAGTGTCTGGAGAGGTAAGCGGAATTCCTAGTGTAGCGGTG  
AAATGCGTAGATATTAGGAAGAACACCAGTGGCGAAGGCGGCTTACTGGACAGTAACTGACGTTAGGCTCGAAAGCGTG  
GGGAG

>ASV:1751:Genus:Akkermansia

TACAGAGGTCTCAAGCGTTGTTCCGGAATCACTGGGCGTAAAGCGTGCCTAGGCTGTTTTCGTAAGTCTGTGTGAAAGGCG  
CGGGCTCAACCCGCGGACGGCACATGATACTGCGAGACTAGAGTAATGGAGGGGGAACCGGAATTCCTGGTGTAGCAGTG  
AAATGCGTAGATATCGAGAGGAACACTCGTGGCGAAGGCGGTTCTGGACATTAACGACGCTGAGGCACGAAAGGCCAA  
GGGAG

>ASV:1752:Genus:Alloprevotella

TACGGAAGGTCCGGCGTTATCCGGAATTATTGGGTTAAAGGGAGCGCAGGCGGGAGTGTAAGTCAAGTCTGTTAAATATC  
AGAGCCCAACTCTGTTATGCAGTTGAAACTATATTTCTTGAGTACGCACAGGGATGGCGGAATTCAGGGTGTAGCGGTGA  
AATGCTTAGATATCCTGAAGAACTCCGATCGCGAAGGCGCCATCCGGAGCGTAACTGACGCTGAGGCTCGAAGGTGCGG  
GTATC

>ASV:1753:Family:Christensenellaceae

TACGTAGGGAGCAAGCGTTGTCCGGAATTACTGGGCGTAAAGGGTGCCTAGGCGGGCAGTTAGTCAAGTGAATATC  
GGGGCTTAACCCGGGGCTGCTTCTGATACTGCTGTGCTTGGAGTGCAGGAGAGGTAAGCGGAATTCCTAGTGTAGCGGTG  
AAATGCGTAGATATTAGGAGGAACACCAGTGGCGAAGGCGGCTTACTGGACTGTAACGACGCTGAAGCACGAAAGCGTG  
GGTAG

>ASV:1754:Genus:Coprococcus\_1

TACGTAGGGGGCAAGCGTTATCCGGATTTACTGGGTGTAAGGGAGCGCAGGCGGGCGCAAGTCAAGTGAAGGCC  
GGGGCTTAACCCGGGACTGCTTTTGAAGTGTGCGGCTAGATTTACAGGAGAGGTAAGCGGAATTCCTAGTGTAGCGGTG  
AAATGCGTAGATATTAGGAGGAACACCAGTGGCGAAGGCGGCTTACTGGACTGATAATGACGCTGAGGCTCGAAAGCGTG  
GGGAG

>ASV:1755:Genus:Intestinibacter

TACGTAGGGGCTAGCGTTATCCGGATTTACTGGGCGTAAAGGGTGCCTAGGCGGCTTTTTAAGTCAAGTGAAGGCT  
ACGGCTCAACCGTAGTAAGCTCTTGAAGTGAAGGACTTGAAGTGCAGGAGAGGAGAGTGAATTCCTAGTGTAGCGGTGA  
AATGCGTAGATATTAGGAGGAACACCAGTAGCGAAGGCGGCTCTCTGACTGTAACGACGCTGAGGCACGAAAGCGTG  
GGAGC

>ASV:1756:Genus:Streptococcus

TACGTAGGTCCCGAGCGTTGTCCGGATTTATTGGGCGTAAAGCGAGCGCAGGCGGTTTGATAAGTCTGAAGTAAAAGGCT  
GTGGCTTAACCATAGTATGCTTTGAAACTGTCAAACCTTGAAGTACAGAAGGGGAGAGTGAATTCATGTGTAGCGGTGA  
AATGCGTAGATATATGGAGGAACACCAGTGGCGAAGGCGGCTCTCTGGTCTGTAACGACGCTGAGGCTCGAAAGCGTG  
GGAGC

>ASV:1757:Family:Ruminococcaceae

TACGTAGGGAGCGAGCGTTGTCCGGATTTACTGGGTGTAAGGGTGCCTAGGCGGGATGGCAAGTCAAGTGTGAAATACC  
GGGGCTCAACTCCGGGGCTGCATTTGAAACTGTGCTTCTTGGAGTGAAGTAGAGGCAGGCGGAATTCCTAGTGTAGCGGTG  
AAATGCGTAGATATTAGGAGGAACACCAGTGGCGAAGGCGGCTGCTGGGCTTTAACTGACGCTGAGGCACGAAAGCATG  
GGGAG

>ASV:1758:Genus:Ruminococcus\_1

TACGTAGGGAGCGAGCGTTGTCCGGATTTACTGGGTGTAAGGGAGCGTAGGCGGGATGGCAAGTCAAGTGTGAAATCTG  
AGAGCTCAACTTTCAGACTGCATTTGAAACTGCTGTTCTTGGAGTGAAGTAGAGGTAAGCGGAATTCCTGGTGTAGCGGTG  
AAATGCGTAGATATCAGGAGGAACATCGGTGGCGAAGGCGGCTTACTGGGCTTTTAACTGACGCTGAGGCTCGAAAGCGTG  
GGGAG

>ASV:1759:Genus:Parabacteroides

TACGGAGGATCCGAGCGTTATCCGGATTTATTGGGTTAAAGGGTGCCTAGGTGGCTTTTTAAGTCAAGCGGTGAAAGTTT  
GTGGCTCAACCATAAAATTGCCGTTGAAACTGGGGGCTTGAAGTATATTTGAGGTAGGCGGAATGCGTGGTGTAGCGGTG  
AAATGCGTAGATATCAGCAGAACTCAATTTGCGAAGGCGAGCTTACTAAACTATAACTGACACTGAAGCACGAAAGCGTG  
GGGAT

>ASV:1760:Genus:Rothia

TACGTAGGGCGCGAGCGTTGTCCGGAATTATTGGGCGTAAAGAGCTTGTAGGCGGTTTGTCCGCTCTGCTGTGAAAGGCC  
GGAGCTTAACCTCCGTGATTGACAGTGGGTACGGGCGAGCTAGAGTGCAGTAGGGGAGACTGGAATTCCTGGTGTAGCGGT  
GGAATGCGCAGATATCAGGAGGAACCCGATGGCGAAGGCGAGTCTCTGGGCTGTAACGACGCTGAGGAGGCAAGGCAAT  
GGGA

>ASV:1761:Genus:Butyrivibrio

TACGGGGGATGCGAGCGTTATCCGGATTTATTGGGTTAAAGGGCGCGTAGGCGGGACGCCAAGTCAAGCGGTGAAAGACT  
GCAGCTAAACTGTAGCACCGGTTGAAACTGGCGACTCAGACGAGACGAGGGAGGCGGAACAAGTGAAGTAGCGGTGA  
AATGCTTAGATATCACTTGAACCCGATAGCGAAGGCGAGCTTCCAGGCTCGCTCTGACGCTGATGCGCGAGAGCGGTG  
GTAGC

>ASV:1762:Genus:Holdemanelle  
TACGTAGGTGGCGAGCGTTATCCGGAATGATTGGGCGTAAAGGGTGCCTAGGTGGCAGATCAAGTCTGGAGTAAAAGGCA  
TGGGCTCAACCCGACTGGCTCTGAAACTGATCAGCTAGAGAACAGAAGAGGACGGCGAACTCCATGTGTAGCGGTAA  
AATGCGTAGATATATGGAAGAACACCGGTGGCGAAGGCGCCGCTCTGGTCTGGATTCTGACACTGAAGCACGAAAGCGTG  
GGAG

>ASV:1763:Genus:Subdoligranulum  
AACGTAGGGTGAACGCTTGTCCGGAATTAAGGGTGTAAAGGGAGCGCAGGCGGACCGCAAGTTGGAAGTAAAACCTA  
TGGGCTCAACCCATAAATTGCTTTCAAACCTGCTGGCCTTGGTGTAGTAGTGCAGAGGTAGTGGAATTCCTGGTGTAGCGGTG  
GAATGCGTAGATATCGGAGGAACACCCAGTGGCGAAGGCGACCTACTGGGCACCAACTGACGCTGAGGCTCGAAAGCATG  
GGTAG

>ASV:1764:Family:Lachnospiraceae  
TACGTAGGGGGCAAGCGTTATCCGGAATTAAGGGTGTAAAGGGAGCGTAGACGGGAGTGCAAGTCTGGAGTAAAAGGCA  
GGGGCTCAACCCGACTGGCTTTGAAACTGTAGTCTAGAGTGGCGGAGAGGTAAGCGGAATTCCTAGTGTAGCGGTG  
AAATGCGTAGATATTAGGAGGAACACCCAGTGGCGAAGGCGGCTTACTGGACGGTAAGTACGCTTGGGCTCGAAAGCGTG  
GGAG

>ASV:1765:Species:bohemicus/movanagherensis  
TACAGAGGGTGAACGCTTATCCGGAATTAAGGGTGTAAAGGGTGCCTAGGTGGTCTTTTAAAGTCCGATGTGAAATCCC  
TGAGCTTAACCTAGGAATTGCTTTGAAACTGCTGATACTGGGAGACTAGAGTATGGGAGAGGTAAGCGGAATTCCTAGTGTAGCGGTG  
AAATGCGTAGAGATCTGGAGGAATACCCAGTGGCGAAGGCGGCTTACTGGACGGTAAGTACGCTTGGGCTCGAAAGCATG  
GGAG

>ASV:1766:Genus:UC5-1-2E3  
TACGTAGGGGGCAAGCGTTATCCGGAATTAAGGGTGTAAAGGGAGCGTAGACGGCAAGACAAGTCTGGAGTAAAAGCCC  
GGGGCTCAACCCGCGGACTGCTTGGAAACTGCTTGGAGTGTGGAGAGGCAAGCGGAATTCCTAGTGTAGCGGTG  
AAATGCGTAGATATTAGGAGGAACACCCAGTGGCGAAGGCGGCTTGGTGGACAGTAAGTACGCTTGGGCTCGAAAGCGTG  
GGAG

>ASV:1767:Genus:Christensenellaceae\_R-7\_group  
TACGTAGGGGGCAAGCGTTGTCGGAATGACTGGGCGTAAAGGGTGCCTAGGTGGTATGACAAGTCAAGTGTGAAAGTCC  
ATTTTCAAGGATGGAATTGCTTTGAGACTGTTGGCTTGGTGGAGAGGTAAGTGGAAATTCCTAGTGTAGCGGTG  
AAATGCGTAGAGATTGGGAGGAACACCCAGTGGCGAAGGCGACTTACTGGCCGTAAGTACGCTTGGGCTCGAAAGCGTG  
GGAG

>ASV:1768:Genus:Anaerostipes  
TACGTAGGGGGCAAGCGTTATCCGGAATTAAGGGTGTAAAGGGTGCCTAGGTGGTATGACAAGTCAAGTGTGAAAGCCC  
AGGGCTTAACCTGGGACTGCTTTGAAACTGCTAGACTGGAGTGCAGGAGAGGTAAGCGGAATTCCTAGTGTAGCGGTG  
AAATGCGTAGATATTAGGAGGAACATCAGTGGCGAAGGCGGCTTACTGGACTGAAACTGACACTGAGGCACGAAAGCGTG  
GGAG

>ASV:1769:Species:marisminoris  
TACGGAGGGGACTAGCGTTGTTCCGGAATTAAGGGTGTAAAGGGTGCCTAGGTGGTATGACAAGTCAAGTGTGAAAGCCC  
GGGGCTCAACCCGGAAGTGCCTTGGACTGCTGATACTGGTGTAGTCTGGAGTCTGGAGAGGTGAGTGGAAATTCCTAGTGTAGAGGTG  
AAATTCGTAGATATTGGAGGAACACCCAGTGGCGAAGGCGGCTACTGGCCAGATACTGACGCTGAGGTGCGAAAGTGTG  
GGAG

>ASV:1770:Species:aeruginosa/denitrificans/fluorescens/mendocina/otitidis/protegens/putida/  
tropicalis  
TACGAAGGGTGAACGCTTATCCGGAATTAAGGGTGTAAAGGGTGCCTAGGTGGTTCAGCAAGTGGATGTGAAATCCC  
CGGGCTCAACCTGGGAACTGCATCCAAACTACTGAGCTAGAGTACGGTAGAGGGTGGTGGAAATTCCTGTGTAGCGGTG  
AAATGCGTAGATATTAGGAGGAACACCCAGTGGCGAAGGCGACACCTGGACTGATACTGACACTGAGGTGCGAAAGCGTG  
GGAG

>ASV:1771:Species:lacrimalis  
TACGTAGGGGGCTAGCGTTGTCGGAATTAAGGGTGTAAAGGGTGCCTAGGTGGTTCAGCAAGTGGATGTGAAAGGCA  
AAGGCTCAACCTTTGTAAGCATCTGAAACTGTATAGCTTGGAGAGTGTAGAGGCAAGTGGAAATTTTGTGTAGCGGTGA  
AATGCGTAGATATTAAGGAATACCGGTGGCGAAGGCGACTTGTGGGCACAATCTGACGCTGAGGAACGAAAGCGTG  
GGAG

>ASV:1772:Genus:Blautia  
TACGTAGGGGGCAAGCGTTATCCGGAATTAAGGGTGTAAAGGGAGCGTAGACGGATGGACAAGTCTGATGTGAAAGGCT  
GGGGCTCAACCCGCGGACTGCATTGAAACTGCTTGGTGTAGTGGCGGAGAGGTAAGCGGAATTCCTAGTGTAGCGGTG  
AAATGCGTAGATATTAGGAGGAACACCCAGTGGCGAAGGCGGCTTACTGGACGGTAAGTACGCTTGGGCTCGAAAGCGTG  
GGAG

>ASV:1773:Genus:Sphingomonas  
TACGGAGGGGGCTAGCGTTGTTCCGGAATTAAGGGTGTAAAGGGTGCCTAGGTGGTTCAGCAAGTGGATGTGAAAGGCA  
GGAGCTCAACCTCCGGAATTGCTTTAAGACTGCATCGCTCGAATCATGGAGAGGTGAGTGGAAATTCCTAGTGTAGAGGTG  
AAATTCGTAGATATTGGAGGAACACCCAGTGGCGAAGGCGACTACTGGACATGTATTGACGCTGAGGTGCGAAAGCGTG  
GGAG

>ASV:1774:Genus:Butyricimonas  
TACGGGGGATGCGAGCGTTATCCGGAATTAAGGGTGTAAAGGGTGCCTAGGTGGTTCAGCAAGTGGATGTGAAAGGCA  
GCAGCTAAACTGTAGCACCGCTTAAAGACTGCTGATACTGGAGAGGTAAGCGGAATTCCTAGTGTAGAGGTG  
AAATTCGTAGATATTGGAGGAACACCCAGTGGCGAAGGCGACTACTGGACATGTATTGACGCTGAGGTGCGAAAGCGTG  
GTAGC

>ASV:1775:Genus:Sutterella  
TACGTAGGGTGAACGCTTATCCGGAATTAAGGGTGTAAAGGGTGCCTAGGTGGTTCAGCAAGTGGATGTGAAATCCC

CGGGCTCAACCTGGGAATTGCATATATGACTGCAGGACTTGAGTTTGTGACAGGAGGGTGGAAATCCACGTGTAGCAGTG  
AAATGCGTAGATATGTGGAAGAACCACCGATGGCGAAGGCAGCCCTCTGGGACATGACTGACGCTCATGCACGAAAGCGTG  
GGGAG

>ASV:1776:Genus:Escherichia/Shigella

TACGGAGGGTGAAGCGTTAATCGGAATTACTGGGCGTAAAGCGCACGCAGGCGGTTTGTAAAGTCAGATGTGAAATCCC  
CGGGCTCAACCTGGGAAGTGCATCTGATACTGGCAAGCTTGAGTCTCGTAGAGGGGGGTAGAATCCAGGTGTAGCGGTG  
AAATGCGTAGAGATCTAGAGGAATACCGGTGGCGAAGGCAGCCCTCTGGACGAAGACTGACGCTCAGGTGCGAAAGCGTG  
GGGAG

>ASV:1777:Genus:Lachnospira

TACGTATGGAGCAAGCGTTATCCGGATTTACTGGGTGTAAGGGAGTGTAGGTGGCCAGGCAAGTCAGAAGTAAAGCCC  
GGGGCTCAACCCCGGACTGCTTTTGAAGTGCAGGCTTAGAGTGCAGGAGGGGCAAGTGGAAATTCCTAGTGTAGCGGTG  
AAATGCGTAGATATTAGGAGGAACACCCAGTGGCGAAGGCAGCTTGTCTGGACTGTAACGACTGAGGCTCGAAAGCGTG  
GGGAG

>ASV:1778:Genus:Paraprevotella

TACGGAAGATGCGAGCGTTATCCGGATTTATTGGGTTAAAGGGAGCGTAGGCGGGCTTTAAAGTCAGCGGTCAAATGTC  
GTGGCTCAACCATGTCAAGCGGTTGAAACTGTAAAGCTTGAGTCTGCACAAGGCACATGGAATTCGTGGTGTAGCGGTGA  
AATGCTTAGATATCACGAAGAACTCCGATCGCAAGGCATTGTGCCGGGCATAACTGACGCTGAGGCTCGAAAGTGGCG  
GTATC

>ASV:1779:Genus:Ruminococcus\_1

TACGTAGGGAGCGAGCGTTGTCCGGAATTACTGGGTGTAAGGGAGCGTAGGCGGGATGGTAAAGTCAGATGTGAAAATA  
TGGGCTCAACCCATAGACTGCATTTGAAACTGCTGTTCTTGAGTGAAGTAGAGGTAAGCGGAATTCCTAGTGTAGCGGTG  
AAATGCGTAGATATTAGGAGGAACATCGGTGGCGAAGGCAGCTTACTGGGCTTTACTGACGCTGAGGCTCGAAAGCGTG  
GGGAG

>ASV:1780:Species:atypica

TACGTAGGTGGCAAGCGTTGTCCGGAATTATTGGGCGTAAAGCGCGCAGGCGGATTAGTTAGTCTGTCTTAAAAGTTC  
GGGGCTTAAACCCGTGATGGATGGAAGTGTGATCTAGAGTATCGGAGAGGAAAGTGGAAATTCCTAGTGTAGCGGTGA  
AATGCGTAGATATTAGGAAGAACACCCAGTGGCGAAGGCAGCTTCTGGACGAAAACGACTGACGCTGAGGCGGAAAGCCAG  
GGAGC

>ASV:1781:Genus:Christensenellaceae\_R-7\_group

TACGTAGGGGGCGAGCGTTGTCCGGAATGACTGGGCGTAAAGGGCGCGTAGGCGGCTTGATAAGTTAGAAGTAAAAGTCC  
TGCTTCAAGGTGGGAATTGCTTTTAACTGTTGAGCTTGAGTGCAGAAGAGGTAAGCGGAATTCAGTGTAGCGGTG  
AAATGCGTAGAGATTTGGAAGAACCACAGTGGCGAAGGCAGCTTACTGGGCTGTAACGACGCTGAGGCGGAAAGCGTG  
GGGAG

>ASV:1782:Genus:Staphylococcus

TACGTAGGTGGCAAGCGTTATCCGGAATTATTGGGCGTAAAGCGCGCGTAGGCGGTTTTTAAAGTCTGATGTGAGAGCCC  
ACGGCTCAACCGTGGAGGGTATTGGAAGTGGAAAACCTTGAGTGCAGAAGAGGAAAGTGGAAATTCATGTGTAGCGGTG  
AAATGCGCAGAGATATTGGAAGAACCACAGTGGCGAAGGCAGCTTCTGGTCTGTAACGACGCTGATGTGCGAAAGCGTG  
GGGAT

>ASV:1783:Family:Christensenellaceae

TACGTAGGGGGCGAGCGTTGTCCGGAATTACTGGGCGTAAAGGGTGCAGGCGGCCCTGCAGGTGAGATGTGAAATACC  
CGTGCTTAACTGGGGCTGCATTTGAAACCGTAGGGCTTGAGTGTGGAAGAGGTAAGTGGAAATTCCTGGTGTAGCGGTG  
AAATGCGTAGAGATCGGGAGGAACACCCAGTGGCGAAGGCAGCTTACTGGGCCAACGACTGACGCTGAGGCGGAAAGCGTG  
GGGAG

>ASV:1784:Genus:Faecalibacterium

AACGTAGGTACAAGCGTTGTCCGGAATTACTGGGTGTAAGGGAGCGCAGGCGGGAGAACAAAGTTGGAAGTAAAATCCA  
TGGGCTCAACCCATGAAGTGTCTTCAAAGTGTCTTCTTGAGTAGTGCAGAGGTAGGCGGAATTCCTGGTGTAGCGGTG  
GAATGCGTAGATATCGGGAGGAACACCCAGTGGCGAAGGCAGCTTACTGGGCACCAACTGACGCTGAGGCTCGAAAGTGTG  
GGTAG

>ASV:1785:Genus:Bacteroides

TACGGAGGATGCGAGCGTTATCCGGATTTATTGGGTTAAAGGGAGCGTAGATGGGCTTTTAAAGTCAGTTGTGAAATCT  
GCGGCTCAACCGTAGAACTGCAGTTGAAACTGGGAGCCTTGAGTGCAGTTGAGGTGCATGGAATTCGTGGTGTAGCGGTG  
AAATGCTTAGATATCACGAAGAACTCCGATTGCGAAGGCAGTGCACCAAGCTGTAACGACTTGTGCTCGAAAGTGTG  
GGTAT

>ASV:1786:Genus:Dorea

TACGTAGGGGGCAAGCGTTATCCGGATTTACTGGGTGTAAGGGAGCGTAGACGGCTGTGCAAGTCTGAAGTAAAGGCA  
TGGGCTCAACCTGTGGACTGCTTTGGAAGTGTGACGCTAGAGTGTGCGATAGGTAAGTGGAAATTCCTAGTGTAGCGGTG  
AAATGCGTAGATATTAGGAGGAACACCCAGTGGCGAAGGCAGCTTACTGGACGATGACTGACGTTGAGGCTCGAAAGCGTG  
GGGAG

>ASV:1787:Genus:Coprococcus\_3

TACGTATGGTGAAGCGTTATCCGGATTTACTGGGTGTAAGGGAGCGTAGACGGCTGCGTAAGTCTGAAGTAAAGGCC  
GGGGCTCAACCCCGGACTGCTTTGGAAGTGTGACGCTAGAGTGTGCGATAGGTAAGTGGAAATTCCTAGTGTAGCGGTG  
AAATGCGTAGATATTGGGAGGAACACCCAGTGGCGAAGGCAGCTTGTCTGGACGATGACTGACGTTGAGGCTCGAAAGCGTG  
GGGAG

>ASV:1788:Family:Burkholderiaceae

TACGTAGGGTGCAGCGTTAATCGGAATTACTGGGCGTAAAGCGTGCAGGCGGTTATGTAAGACAGATGTGAAATCCC  
CGGGCTCAACCTGGGAAGTGCATTTGACTGCATAGCTAGAGTACGGCAGAGGGGGATGGAATTCCTGGCGTGTAGCAGTG  
AAATGCGTAGATATGCGGAGGAACACCCAGTGGCGAAGGCAATCCCTGGGCTGTACTGACGCTCATGCACGAAAGCGTG  
GGGAG

>ASV:1789:Genus:Lachnoclostridium  
TACGTAGGGGGCAAGCGTTATCCGGATTTACTGGGTGTAAGGGAGCGTAGACGGTAAAGCAAGTCTGAAGTGAAAGCCC  
GGGGCTCAACCTCGGACTGCTTTGAAACTGTTAACTAGAGTGTGGAGAGGTAAGCGGAATTCCTAGTGTAGCGGTG  
AAATGCGTAGATATTAGGAGGAACACCAAGTGGCGAAGGCGGCTTACTGGACAGTAACGACGTTGAGGCTCGAAAGCGTG  
GGGAG

>ASV:1790:Genus:Ruminococcaceae\_NK4A214\_group  
TACGTAGGTGGCGAGCGTTATCCGGATTTACTGGGTGTAAGGGCGCGTAGGCGGGAATGCAAGTCAGATGTGAAATCCA  
AGGGCTCAACCTGGAACTGCTTTGAAACTGCATTTCTTGAGTGTGGAGAGGTTGACGGAATTCCTAGTGTAGCGGTG  
AAATGCGTAGATATTAGGAGGAACACCAAGTGGCGAAGGCGGTCAACTGGACGATAACTGACGCTGAGGCGGAAAGCGTG  
GGGAG

>ASV:1791:Genus:Ruminococcaceae\_UCG-010  
TACGTAGGTGGCGAGCGTTATCCGGATTTACTGGGTGTAAGGGTGTGTAGGCGGATTGCAAGTCAGATGTGAAAATTA  
TGGGCTCAACTCATAAAGTGCATTTGAAACTGCAGTTCTTGAGTATCGGAGAGGTAAGCGGAATTCCTGGTGTAGCGGTG  
AAATGCGTAGATATTAGGAGGAACACCGGTGGCGAAGGCGGCTTACTGGACGACAACGACGCTGAGACACGAAAGTGTG  
GGGAG

>ASV:1792:Genus:Porphyromonas  
TACGGAGGATACGAGCGTTATCCGGATTTATTGGGTTTAAAGGGTGCAGGTGGTCTGCAAGTCAGTGGTAAAAGCT  
GAGGCTCAACCTCAGCTGGCTTTGAAACTGCAAGCTTGGAGTACATGATGTGGCGGAATGCGTGTAGTGTAGCGGTG  
AAATGCATAGATATTACGAGAACTCCGATTGCGAAGGCAGCTCACAAAGGTATATCTGACACTGAGGCACGAAAGCGTG  
GGGAG

>ASV:1793:Genus:Coproacter  
TACGGAGGATGCGAGCGTTATCCGGATTTATTGGGTTTAAAGGGTGCAGGTGGTCTGCAAGTCAGCGGTGAAAATTT  
TCGGCTCAACCGGAAAAGTGCATTTGAAACTGTAGAGCTAGAGTACACAAGAGGTATGCGGAATGCGTGGTGTAGCGGTG  
AAATGCATAGATATTACGAGAAACCCGATTGCGAAGGCAGCATACTGGGTGAAACAGACGCTGAAGCACGAAAGCGTG  
GGTAT

>ASV:1794:Genus:Lachnoclostridium  
TACGTAGGGGGCAAGCGTTATCCGGATTTACTGGGTGTAAGGGAGCGTAGACGGTGGACAAGTCTGAAGTGAAAGCCC  
AGGGCTCAACCTGGAACTGCTTTGAAACTGCGCGCTAGAGTGTGGAGAGGTAAGTGAATTCCTAGTGTAGCGGTG  
AAATGCGTAGATATTAGGAGGAACACCAAGTGGCGAAGGCGGCTTACTGGACAGTAACGACGTTGAGGCTCGAAAGCGTG  
GGGAG

>ASV:1795:Genus:Clostridium\_sensu\_stricto\_1  
TACGTAGGTGGCGAGCGTTGTCCGGATTTACTGGGCGTAAAGGGAGCGTAGGCGGATTTTTAAGTGAGATGTGAAATACT  
CGGGCTTAACCTGAGTGTGCTGATTTCAAACCTGGAAGTCTAGAGTGCAGGAGAGGAGAAGGGAATTCCTAGTGTAGCGGTG  
AAATGCATAGAGATTAGGAAGAACACCAAGTGGCGAAGGCGCTTCTCTGGACTGTAACGACGCTGAGGCTCGAAAGCGTG  
GGGAG

>ASV:1796:Genus:Parabacteroides  
TACGGAGGATCCGAGCGTTATCCGGATTTATTGGGTTTAAAGGGTGCAGGTGGGCGGCTTTTAAAGTCAGCGGTGAAAGTCT  
GTGGCTCAACCATAGAAATTGCGTTGAAACTGGGGGCTTGGATGTTTGGAGGAGGCGGAATGCGTGGTGTAGCGGTG  
AAATGCATAGATATTACGAGAAACCCGATTGCGAAGGCAGCTGCTGGACTGTAACGACGCTGATGCTCGAAAGTGTG  
GGTAT

>ASV:1797:Genus:Erysipelotrichaceae\_UCG-003  
TACGTAGGTGGCGAGCGTTATCCGGAATTTATTGGGCGTAAAGGGAGCGAGGCGGCGACTAAGGGTCTGTGGTAAAAGATC  
GAAGCTTAACCTCGGTAAGCCATGAAACCATAGAGCTAGAGTGTGTGAGAGGATCGTGAATTCATGTGTAGCGGTGA  
AATGCGTAGATATTAGGAGGAACACCAAGTGGCGAAGGCGACGATCTGGGCGATAACTGACGCTCAGTCCGAAAGCGTG  
GGAGC

>ASV:1798:Genus:Bacteroides  
TACGGAGGATCCGAGCGTTATCCGGATTTATTGGGTTTAAAGGGAGCGTAGATGGATGTTTAAAGTCAGTGTGAAAATTT  
GCGGCTCAACCGTAAAATTGCAAGTTGATACTGGATATCTTGAGTGCAGTTGAGGCAGGCGGAATTCCTAGTGTAGCGGTG  
AAATGCGTAGATATTAGGAGGAACACCAAGTGGCGAAGGCGGCTTCTGGACTGTAACGACACTGAGGCACGAAAGCGTG  
GGGAG

>ASV:1799:Genus:Megasphaera  
TACGTAGGTGGCAAGCGTTGTCCGGAATTTATTGGGCGTAAAGGGCGCGCAGGCGGCATCGCAAGTCGGTCTTAAAAGTGC  
GGGGCTTAACCCGTGAGGGGACCGAAACTGTGAAGCTCGAGTGTGGAGAGGAAAGCGGAATTCCTAGTGTAGCGGTGA  
AATGCGTAGATATTAGGAGGAACACCAAGTGGCGAAGGCGGCTTCTGGACGACAACGACGCTGAGGCGGAAAGCCAGG  
GGAGC

>ASV:1800:Family:Sporolactobacillaceae  
TACGTAGGTGGCAAGCGTTGTCCGGAATTTATTGGGCGTAAAGGGCGCGCAGGCGGCTTCTTAAAGTCTGATGTGAAATCTT  
GCGGCTCAACCGCAAGCGGTATTGAAACTGGGAGGCTTGGTGCAGAAAGAGGAGTGAATTCACGTTAGCGGTG  
AAATGCGTAGATATTAGGAGGAACACCAAGTGGCGAAGGCGGCTTCTGGTCTGTAACGACGCTGAGGCGGAAAGCGTG  
GGGAG

>ASV:1801:Species:eneae/lathyri/massiliensis/thiooxidans/vaviloviae/vestrisii  
TACGAAGGGGGCTAGCGTTGCTCGGAATCACTGGGCGTAAAGGGCGCGTAGGCGGACTCTTAAAGTCGGGGTAAAAGCCC  
AGGGCTCAACCTGGAATTCCTGATACTGAGAGTCTTGAGTTCGGAAGAGGTTGGTGAAGTGCAGTGTAGAGGTG  
AAATTCGTAGATATTGCAAGAACACCAAGTGGCGAAGGCGGCAACTGGTCCGATACTGACGCTGAGGCGGAAAGCGTG  
GGGAG

>ASV:1802:Genus:Intestinibacter  
TACGTAGGGGGCTAGCGTTATCCGGATTTACTGGGCGTAAAGGGTGCAGGTGGTCTTTTAAAGTTAGGAGTAAAAGGCT  
ACGGCTCAACCGTAGTAAGCTCTTGAACCTGGAGGACTTGGTGCAGGAGAGGAGAGTGAATTCCTAGTGTAGCGGTG

AATGCGTAGATATTAGGAGAACACCAGTAGCGAAGGCGGCTCTCTGGACTGTAAGTACGCTGAGGCACGAAAGCGTGG  
GGAGC  
>ASV:1803:Genus:Subdoligranulum  
AACGTAGGGTGCAAGCGTTGTCCGGAATTACTGGGTGTAAGGGAGCGCAGGCGGACCGCAAGTCGGAAAGTAAAACCTA  
TGGGCTCAACCCATAAATTGCTTTCAAAGTCTGGCCTTGGAGTAGTCAGAGGTAGGTGGAATTCCTGGTGTAGCGGTG  
GAATGCGTAGATATCGGGAGAACACCAGTGGCGAAGGCGACCTACTGGGCACCAACTGACGCTGAGGCTCGAAAGCATG  
GGTAG  
>ASV:1804:Genus:DNF00809  
CACGTAGGGGGCGAGCGTTATCCGGATTATTGGGCGTAAAGCGCGCTAGGCGGCCCTCAAGCGGGACCTCTAATCCC  
GGGGCTCAACCCGGGCGGGTCCCGAACTGGGCGGCTCGAGTCAGGTAGAGGCAGGCGGAATTCCTGGTGTAGCGGTGA  
AATGCGCAGATATCGGGAAGAACACCAGTGGCGAAGGCGACCTGCTGGGCTTACTGACGCTGAGGCGCGAAAGCCGGT  
GGAGC  
>ASV:1805:Genus:Oscillibacter  
TACGTAGGTGGCAAGCGTTGTCCGATTTACTGGGTGTAAGGGCGTGCAGCCGGGCTGATAAGTCAGATGTGAAATCTG  
GAGGCTCAACCTCAAAGTGCATTTGAACTGTCGGTCTTGGAGTATCGGAGAGGTAAACCGAATTCCTAGTGTAGCGGTG  
AAATGCGTAGATATTAGGAAGAACACCAGTGGCGAAGGCGGGTACTGGACGACAACGACGCTGAGGCGCGAAAGCGTGG  
GGAG  
>ASV:1806:Genus:Lachnospiraceae\_UCG-004  
TACGTAGGGGGCAAGCGTTATCCGGATTTACTGGGTGTAAGGGAGCGTAGACGGCGATGCAAGTCTGAAAGTAAATACC  
CGGGCTCAACCTGGGAACTGCTTTGAAACTGTATGGCTAGAGTGTGGAGAGGTAAAGCGGAATTCCTAGTGTAGCGGTG  
AAATGCGTAGATATTAGGAGAACACCAGTGGCGAAGGCGGCTTACTGGACGATAACTGACGCTGAGGCTCGAAAGCGTGG  
GGAG  
>ASV:1807:Family:Ruminococcaceae  
TACGTAGGGAGCAAGCGTTGTCCGATTTACTGGGTGTAAGGGTGCCTAGGCGGGATCAAGTCAGACGTGAAATCCA  
TCGGCTTAACCTGATGAACTGCTTTGAAACTGGTATTCTTGGAGTGCAGAGGCAGGCGGAATTCCTGGTGTAGCGGTG  
AAATGCGTAGAGATCGGGAGAACACCAGTGGCGAAGGCGGCTGCTGGGGCTTAAGTACGCTGAGGCGCGAAAGCGTGG  
GGAG  
>ASV:1808:Genus:Family\_XIII\_AD3011\_group  
TACGTAGGGGGCAAGCGTTATCCGGAATTATTGGGCGTAAAGAGTGCCTAGGTGGTTACCTAAGCAGGGGGTAAAGGCT  
ATGGCTTAACCATAGTCAGCCCTGAACTGGGCTACTTGGAGTGCAGGAGAGGAAAGCGGAATTCCTAGTGTAGCGGTGA  
AATGCGTAGATATTAGGAGAACACCAGTGGCGAAGGCGGCTTTCTGGACTGTAAGTACACTGAGGCGCGAAAGTGTGG  
GGAGC  
>ASV:1809:Genus:Prevotella\_6  
TACGGAAGGTCCGGGCTTATCCGGATTTATTGGGTTAAAGGGAGCGTAGGCGGCTTTAAAGCGTGTGTGAAATGTA  
GACGCCAACCTCTGCATCGCAGCGGAACTGGGACGCTTGGAGTACGCGCAACGTTGGCGGAATTCCTGCTGTAGCGGTG  
AAATGCTTAGATATGACGAGGAACTCCGATTGCGAAGGCGAGTGCAGGGAGCGGCACTGACGCTTAAGCTCGAAGGTGCG  
GGTAT  
>ASV:1810:Family:Lachnospiraceae  
TACGTAGGGGGCAAGCGTTATCCGGAATTACTGGGTGTAAGGGTGCCTAGGTGGCATGGCAAGTCTGATGTGAAACCCC  
CGGGCTCAACCTGGGGCATGCATTGAAACTGTCAGGCTAGAGTGCAGGAGAGGTAAAGCGGAATTCCTAGTGTAGCGGTG  
AAATGCGTAGATATTAGGAGAACACCAGTGGCGAAGGCGGCTTACTGGACTGTAACAGACACTGAGGCGCGAAAGCGTGG  
GGAG  
>ASV:1811:Genus:GCA-900066225  
TACGTAGGTGGCAAGCGTTGTCCGGAATTACTGGGTGTAAGGGAGCGTAGGCGGGAAGACAAGTTGAATGTTAAACTA  
TCGGCTTAACCGGTAGTCGCGTTCAAAGTGTCTTCTTGGAGTGAAGTAGAGGCAGGCGGAATTCCTAGTGTAGCGGTGA  
AATGCGTAGATATTAGGAGAACACCAGTGGCGAAGGCGGCTTCTGGCTTAACTGACGCTGAGGCTCGAAAGCGTGG  
GTAGC  
>ASV:1812:Genus:Alistipes  
TACGGAGGATCAAGCGTTATCCGGATTTATTGGGTTAAAGGGTGCCTAGGCGGTTTGATAAGTTAGAGGTGAAATACC  
GGTGTAAACACCGAACTGCCTCTAATACTGTTGGACTAGAGAGTAGTTGCGGTAGGCGGAATGTATGGTGTAGCGGTG  
AAATGCTTAGAGATCATACAGAACACCAGTGGCAAGGCGAGCTTACCAAATATATCTGACGTTGAGGCGCGAAAGCGTGG  
GGAG  
>ASV:1813:Family:Ruminococcaceae  
TACGTAGGGAGCGAGCGTTGTCCGGAATTACTGGGTGTAAGGGTGCCTAGGCGGCTTTGCAAGTCAGTTGTGAAATCTA  
TGGGCTTAACCCATAGCCTGCAATTGAAACTGTAGAGCTTGGAGTGAAGTAGAGGTAGGCGGAATTCCTGGTGTAGCGGTG  
AAATGCGTAGAGATCGGGAGAACACCAGTGGCGAAGGCGGCTTACTGGCTTAACTGACGCTGAGGCGCGAAAGTGTGG  
GGTAG  
>ASV:1814:Genus:Faecalibacterium  
AACGTAGGTCAAGCGTTGTCCGGAATTACTGGGTGTAAGGGAGCGCAGGCGGGAAGACAAGTTGGAAGTAAATCTA  
TGGGCTCAACCCATAAAGTCTTTCAAAGTGTCTTCTTGGAGTGCAGAGGTAGGCGGAATTCCTGGTGTAGCGGTG  
GAATGCGTAGATATCGGGAGAACACCAGTGGCGAAGGCGACCTACTGGGCACCAACTGACGCTGAGGCTCGAAAGTGTGG  
GGTAG  
>ASV:1815:Species:pneumosintes  
TACGTAGGTGGCAAGCGTTGTCCGGAATTATTGGGCGTAAAGCGCGCGCAGGCGGTTTCTTAAGTCCATCTTAAAGCGT  
GGGGCTCAACCCATGAGGGGATGAAACTGGGAAGTGGAGTATCGGAGAGGAAAGTGAATTCCTAGTGTAGCGGTGA  
AATGCGTAGAGATTAGGAAGAACACCAGTGGCGAAGGCGACTTCTAGACGAAAACGACGCTGAGGCGCGAAAGCGTGG  
GGAGC  
>ASV:1816:Genus:Streptococcus

TACGTAGGTCCCGAGCGTTGTCCGGATTTATTGGGCGTAAAGAGAGCGCAGGCGGTTTGATAAGTCTGAAGTTAAAGGCT  
GTGGCTCAACCATAGTTCGCTTTGGAAACTGTCAAACCTTGAGTGCAGAAGGGGAGAGTGAATTCCATGTGTAGCGGTGA  
AATGCGTAGATATATGAGGAACACCCGGTGGCGAAAGCGGCTCTCTGGTCTGTAACCTGACGCTGAGGCTCGAAAGCGTGG  
GGAG

>ASV:1817:Genus:Howardella

TACGTATGGGGCAAGCGTTATCCGGATTTACTGGGTGTAAAGGGAGGTAGGCGGCAGTACAAGTCAAGTGAAGTAAAACCTT  
GGGGCTCAACCCCAAGACTGCTTTTAAAAGTGTACAGCTAGAGTGTAGGAGGGCAAGCGGAATTCCTGGTGTAGCGGTG  
AATGCGTAGATATCAGGAAGAACCACCGGTGGCGAAGGCGGCTTCTGGACTATAACTGACGCTGAGACTCGAAAGCGTG  
GGAG

>ASV:1818:Genus:Blautia

TACGTAGGGGGCAAGCGTTATCCGGATTTACTGGGTGTAAAGGGAGCGTAGACGGTGTGGCAAGTCCGATGTGAAAGGCA  
TGGGCTCAACCTGTGGACTGCATTGAAAAGTGTACACTTGGAGTCCCGGAGGGGTAAGCGGAATTCCTAGTGTAGCGGTG  
AATGCGTAGATATTAGGAGGAACACCAGTGGCGAAGGCGGCTTACTGGACGGTAACCTGACGCTGAGGCTCGAAAGCGTG  
GGAG

>ASV:1819:Genus:Actinomyces

TACGTAGGGTGCAGCGTTGTCCGGAAATTATTGGGCGTAAAGGGCTTGTAGGCGGTTTGTCCGCTGCTGCCGTGAAATCCT  
CTGGCTTAACTGGGGCGTGGGTGGTACGGGCGAGGCTTGGAGTGGGTAGGGGAGACTGGAACCTCCTGGTGTAGCGGTG  
GAATGCGCAGATATCAGGAAGAACCACCGGTGGCGAAGGCGGCTTCTGGGCCGTTACTGACGCTGAGGAGCGAAAGCGTG  
GGAG

>ASV:1820:Family:Lachnospiraceae

TACGTAGGGGGCAAGCGTTATCCGGATTTACTGGGTGTAAAGGGAGCGTAGACGGCAATGCAAGTCTGAAGTGAAGGAC  
GGGGCTTAAACCTGTGACTGCTTTGAAAAGTGTAGCTTGGAGTCCCGGAGGGGTAAGCGGAATTCCTAGTGTAGCGGTG  
AATGCGTAGATATTAGGAGGAACACCAGTGGCGAAGGCGGCTTACTGGACGGTAACCTGACGCTGAGGCTCGAAAGCGTG  
GGAG

>ASV:1821:Order:Clostridiales

TACGTAGGGGGCGAGCGTTGTCCGGAAATTACTGGGCGTAAAGGGCGCGCAGGCGGCCGATCAAGTCAAGTGTGAAACCC  
CGGGCTTAACTGGGAACTGCAATTTGAAAAGTGGTTGGCTTGGAGTGCAGGAGAGGAAAGCGGAATTCCTAGTGTAGCGGTG  
AATGCGTAGATATTAGGAAGAACCACCGTGGCGAAGGCGGCTTCTGGACTGCAACTGACGCTGAGGCGCGAAAGCGTG  
GGAG

>ASV:1822:Genus:Dialister

TACGTAGGTGGCAAGCGTTGTCCGGAAATTATTGGGCGTAAAGCGCGCAGGCGGCTTCCCAAGTCCCTCTTAAAAGTGC  
GGGGCTTAAACCCGTGAGGGGATGAAAAGTGTGAACTGGAGTATCGGAGAGGAAAGCGGAATTCCTAGTGTAGCGGTGA  
AATGCGTAGAGATTAGGAAGAACCACCGTGGCGAAGGCGACTTCTGGACGAAAAGTCAAGTGTGAGGCGCGAAAGCGTG  
GGAG

>ASV:1823:Genus:Parabacteroides

TACGGAGGATCCGAGCGTTATCCGGATTTATTGGGTTTAAAGGGTGCCTAGGCGGCTTTTAAAGTCAAGCGGTGAAAGTCT  
GTGGCTCAACCATAGAATTGCGTTGAAAAGTGGGGGCTTGGAGTATGTTTGGAGGAGGCGGAATGCGTGGTGTAGCGGTG  
AATGCTTAGATATCAGCAGAACCACCGATTGCGAAGGCGAGCTGCTAGGTTGCGACAGAGCTGAGGCGCGAAAGCGTG  
GGTAT

>ASV:1824:Genus:Ruminiclostridium\_9

TACGTAGGTGGCAAGCGTTATCCGGATTTACTGGGTGTAAAGGGCGGTAGGCGGGACTGCAAGTCAAGTGTGAAAACCA  
TGGGCTCAACCTGTGGCTGCAATTTGAAAAGTGTAGTTCTTGGAGTGGAGAGGCGAGACGGAATTCCTAGTGTAGCGGTG  
AATGCGTAGATATTAGGAGGAACACCAGTGGCGAAGGCGGCTGCTGGACAGCAACTGACGCTGAGGCGCGAAAGCGTG  
GGAG

>ASV:1825:Genus:Lachnoclostridium

TACGTAGGGGGCAAGCGTTATCCGGATTTACTGGGTGTAAAGGGAGCGTAGACGGTAAAACAAGTCTGAAGTGAAGGCC  
GGGGCTCAACCCGGGACTGCTTTGAAAAGTGTAAACTGAGTGTGGAGAGGTAAGCGGAATTCCTAGTGTAGCGGTG  
AATGCGTAGATATTAGGAGGAACACCAGTGGCGAAGGCGGCTTACTGGACAGTAACCTGACGCTGAGGCTCGAAAGCGTG  
GGAG

>ASV:1826:Genus:Acetanaerobacterium

TACGTAGGTGGCAAGCGTTGTCCGGAAATTACTGGGTGTAAAGGGAGCGTAGGCGGGCGGCAAGCAAAATGTGAAACTGA  
TCGGCTCAACCGGTCATTGCGTTTTGAAACTGTCGCTCTTGGAGTGGAGTAGAGGCAAGGCGGAATTCCTAGTGTAGCGGTG  
AATGCGTAGATATTAGGAGGAACACCAGTGGCGAAGGCGGCTGCTGGGCTTTTACTGACGCTGAGGCTCGAAAGCATGG  
GTAGC

>ASV:1827:Genus:Ruminococcus\_1

TACGTAGGGAGCGAGCGTTGTCCGGAAATTACTGGGTGTAAAGGGAGCGTAGGCGGGATCGAAGTCAAGTCAAGTGTGAAAACCTA  
TGGGCTTAAACCATAAATGCAATTTGAAAAGTGTGGTTCTTGGAGTGAAGTGAAGGTAAGCGGAATTCCTAGTGTAGCGGTG  
AATGCGTAGATATTAGGAGGAACACCAGTGGCGAAGGCGGCTTCTGGACTGTAACCTGACGCTGAGGCGCGAGAGCGTG  
GGAG

>ASV:1828:Genus:Bacteroides

TACGGAGGATCCGAGCGTTATCCGGATTTATTGGGTTTAAAGGGAGCGTAGATGGATGTTTAAAGTCAAGTGTGAAAAGTTT  
GCGGCTCAACCGTAAAATTGCAAGTTGATACTGGATATCTTGGAGTGCAGTTGAGGCGAGGAGGAATTCCTGGTGTAGCGGTG  
AATGCTTAGATATCAGGAAGAACCAGTGGCGAAGGCGGCTTCTGGACTGTAACCTGACGCTGAGGCTCGAAAGTGTG  
GGTAT

>ASV:1829:Genus:Lactococcus

TACGTAGGTCCAGAGCGTTGTCCGGATTTATTGGGCGTAAAGCGAGCGCAGGTGGTTTATTAAGTCTGGTGTAAAAGGCA  
GTGGCTCAACCATTTGTATGCAATTTGAAAAGTGGTAGACTTGGAGTGCAGGAGAGGAGAGTGAATTCCATGTGTAGCGGTGA  
AATGCGTAGATATATGAGGAACACCAGTGGCGAAGGCGGCTCTCTGGCTGTAACCTGACACTGAGGCTCGAAAGCGTG

GGAGC

>ASV:1830:Species:aestuarii/beibuensis/marinus/rhizosphaerae/siganidrum  
TACGGAGGGGCTAGCGTTGTTCCGGAATTACTGGGCGTAAAGCGCACGTAGGCGGACTGGAAAGTTGGGGGTGAAATCCC  
GGGGCTCAACCTCGGAATGCCTTCAAACTATCAGTCTGGAGTTTCGAGAGAGGTGAGTGGAATTCAGTGTAGAGGTG  
AAATTCGTAGATATTCGGAGGAACACCAGTGGCGAAGGCGGCTACTGGCTCGATACTGACGCTGAGGTGCGAAAGCGTG  
GGGAG

>ASV:1831:Genus:Christensenellaceae\_R-7\_group  
TACGTAGGGGCGAGCGTTGTCCGGAATGACTGGGCGTAAAGGGCGTGTAGGCGGCTCTTAAAGTATGGAGTGAACCCC  
AGCTTCAAGGTTGGGCGTGTCTTGTAGACTGGAGAGCTTGTAGTGCAGGAGAGGTAAGTGAATTCAGTGTAGCGGTG  
AAATGCGTAGAGATTGGGAGGAACACCAGTGGCGAAGGCGACTTACTGGCCGTAACGACGCTGAGGCGCGAAAGCGTG  
GGGAG

>ASV:1832:Genus:GCA-900066575  
TACGTAGGGGCGAAGCGTTATCCGGAATTTACTGGGTGTAAGGGAGCGTAGGCGGCTAGACAAGTCAGAAGTAAAAGCCC  
GGGGCTCAACTCCGGGACTGCTTTTAAAAGTGCCTGACTAGATTGCAGGAGAGGTAAGTGAATTCAGTGTAGCGGTG  
AAATGCGTAGATATTAGGAGGAACACCAGTGGCGAAGGCGGCTTACTGGACTGTAATGACGCTGAGGCTCGAAAGCGTG  
GGGAG

>ASV:1833:Genus:Anaerostipes  
TACGTAGGGGCGAAGCGTTATCCGGAATTTACTGGGTGTAAGGGTGCCTAGGTGGTATGGCAAGTCAGAAGTAAAACCC  
AGGGCTTAACTCTGGGACTGCTTTTAAAAGTGCCTGACTAGATTGCAGGAGAGGTAAGCAGGAAATTTCTAGTGTAGCGGTG  
AAATGCGTAGATATTAGGAGGAACATCAGTGGCGAAGGCGGCTTACTGGACTGAAACTGACACTGAGGCACGAAAGCGTG  
GGGAG

>ASV:1834:Genus:Dorea  
TACGTAGGGGCGAAGCGTTATCCGGAATTTACTGGGTGTAAGGGAGCGTAGGCGGCTGTGCAAGTCTGAAGTAAAAGGCA  
TGGGCTCAACCTATGGACTGCTTTGAAAAGTGTGCGGCTAGAGTGTGCGGAGAGGTAAGTGAATTCAGTGTAGCGGTG  
AAATGCGTAGATATTAGGAGGAACACCAGTGGCGAAGGCGGCTTACTGGACGATGACTGACGTTGAGGCTCGAAAGCGTG  
GGGAG

>ASV:1835:Order:Flavobacteriales  
TACGGAGGATGCAAGCGTTATCCGGAATTTACTGGGTGTAAGGGTCCGAGGCGGACAGGTAAGTCAAGTGTGAAATCCC  
GGGGCTCAACCCGGGACTGCTACAGAACTGCCTGACTAGAGAAAGTTGGAGTTGGCGGAATGTGACAAGTAGCGGTG  
AAATGCATAGATATGTACAGAAACCCGATAGCGAAAGCAGCTGACTAAGACTATTCTGACGCTCAGGGACGAAAGCGTG  
GGGAG

>ASV:1836:Genus:Parabacteroides  
TACGGAGGATGCGAGCGTTATCCGGAATTTACTGGGTGTAAGGGTGCCTAGGTGGTAAATTAAGTCAAGCGGTGAAAGTTT  
GTGGCTCAACCATATAATTGCCGTTGAACTGGTTGACTTGTAGTATATTTGAGGTAGCGGAATGCGTGGTGTAGCGGTG  
AAATGCATAGATATCACGAGAACTACGATTGCGAAGGCGGCTTACTAACTATAACTGACACTGAAGCACGAAAGCGTG  
GGGAT

>ASV:1837:Family:Lachnospiraceae  
TACGTATGGAGCAAGCGTTATCCGGAATTTACTGGGTGTAAGGGTGCCTAGGTGGCAGTGCAAGTCAGATGTGAAAGGCC  
GGGGCTCAACCCGGGACTGCAATTTGAACTGCATAGCTAGAGTACAGGAGAGGCAAGCGGAATTCAGTGTAGCGGTG  
AAATGCGTAGATATTAGGAGGAACACCAGTGGCGAAGGCGGCTTACTGGGCTTAACTGACGCTGAGGCTCGAAAGCGTG  
GGGAG

>ASV:1838:Family:Ruminococcaceae  
TACGTAGGTGGCAAGCGTTGTCCGGAATTTACTGGGTGTAAGGGCGTGTAGGCGGGTTTGAAGTCAAGTGTGAAATACC  
GGGGCTTAACTCCGGAAGTGAAGTGAAGTGTAGATCTTGTAGTACTGGAGAGGAAAGTGAATTCAGTGTAGCGGTG  
AAATGCATAGAGATTAGGAGGAACACCAGTGGCGAAGGCGGCTTCTGGACAGTAACTGACGCTGAGGCGCGAAAGCGTG  
GGGAG

>ASV:1839:Genus:Christensenellaceae\_R-7\_group  
TACGTAGGGGCGAGCGTTGTCCGGAATTTACTGGGCGTAAAGGGTGCCTAGGCGGCCCTGCAGGTGAGATGTGAAATACC  
CGTGCTTAACTATGGGGCTGCAATTTGAAACCTAGGGCTTGTAGTGCAGGAGAGGTAAGTGAATTCAGGCTGTAGCGGTG  
AAATGCGTAGAGATCGGGAGGAACACCAGTGGCGAAGGCGACTTACTGGGCGCAACTGACGCTGAGGCGCGAAAGCGTG  
GGGAG

>ASV:1840:Genus:Family\_XIII\_AD3011\_group  
TACGTAGGGGCGAAGCGTTATCCGGAATTTACTGGGCGTAAAGAGTGCCTAGGTGGTACCTAAGCAGGGGTGAAAGGCA  
CTGGCTTAACTAATGTAGCCCTGAACTGGGCTACTTGTAGTGCAGGAGAGGAAAGCGGAATTCAGTGTAGCGGTG  
AATGCGTAGATATTAGGAGGAACACCAGTGGCGAAGGCGGCTTCTGGACTGTTACTGACACTGAGGCGCGAAAGTGTGG  
GGAGC

>ASV:1841:Genus:Dialister  
TACGTAGGTGGCAAGCGTTGTCCGGAATTTACTGGGCGTAAAGCGCGCGAGGCGGCTTCCCAAGTCCCTCTTAAAAGTGC  
GGGGCTTAACTCCGTAATGATGGGAAGGAACTGGGAAGCTGGAGTATCGGAGAGGAAAGTGAATTCAGTGTAGCGGTG  
AATGCGTAGAGATTAGGAAGAACCCGGTGGCGAAGGCGACTTCTGGACGAAAAGTGTGAGGCTGAGGCGCGAAAGCGTG  
GGAGC

>ASV:1842:Family:Peptococcaceae  
TACGTAGGTGGCGAGCGTTGTCCGGAATGACTGGGCGTAAAGGGCGTGTAGGTGGACTGATCAGTCCGATGTGAAAGCCC  
CAGGCTTAACTCGGAACCGCATCCGATACGGTCACTTGTAGTGCAGGAGAGGCGAGTGAATTCAGTGTAGCGGTG  
AAATGCGTAGAGATTGGGAGGAACACCAGTGGCGAAGGCGGCTGCTGGACCGTAACGACACTGAGGCGCGAAAGCGTG  
GGGAG

>ASV:1843:Family:Microbacteriaceae  
TACGTAGGGGCGAAGCGTTGTCCGGAATTTACTGGGCGTAAAGAGCTCGTAGGCGGCTGTGCGCTCTGCTGTGAAATCCC



GAGGCTCAACCTCGGGCTTGCAGTGGGTACGGGCAGACTAGAGTGCGGTAGGGGAGAATGGAATTCCTGGTGTAGCGGTG  
GAATGCGCAGATATCAGGAGGAACACCCAGTGGCGAAGGCAGTTCTCTGGGCCGTAACGTACGCTGAGGAGCGAAAGCGTG  
GGGAG

>ASV:1844:Genus:Blautia

TACGTAGGGGGCAAGCGTTATCCGGATTTACTGGGTGTAAGGGAGCGTAGACGGAGCAGCAAGTCTGATGTGAAAGGCG  
GAGGCTCAACCCCTGACTGCATTGAAACTGTTGATCTTGAGTACC GGAGAGGTAAGCGGAATTCCTAGTGTAGCGGTG  
AAATGCGTAGATATTAGGAGGAACACCAGTGGCGAAGGCGGCTTACTGGACGGTAACGTACGCTTGGGCTCGAAAGCGTG  
GGGAG

>ASV:1845:Family:Ruminococcaceae

TACGTAGGATGCAAGCGTTATCCGGATTTACTGGGTGTAAGGGAGCGCAGGCGGGACTGCAAGTTGGATGTGAAATACC  
GTGGCTTAACACGGAAGTGCATCCAAAAGTGTAGTTCTTGAGTGAAGTAGAGGCAAGCGGAATTCAGTGTAGCGGTG  
AAATGCGTAGATATTAGGAGGAACACCAGTGGCGAAGGCGGCTTCTGGACGATAACGTACGCTGAGGCGCGAAAGCGTG  
GGGAG

>ASV:1846:Genus:Prevotella\_9

TACGGAAGGTCCGGCATTATCCGGATTTATTGGGTTAAAGGGAGCGTAGGCCGGAGATTAAGCGTGTGTGAAATGTA  
GTGGCTCAACCTCTGACTGCAGCGCAACTGGTCTTCTTGAGTACGCACAACGTGGGCGGAATTCGTGGTGTAGCGGTG  
AAATGCTTAGATATCACGAAGAAGTCCGATTGCGAAGGCAGCTCACGGGAGCGCAACTGACGCTGAAGCTCGAAAGTGCG  
GGTAT

>ASV:1847:Genus:Bacteroides

TACGGAGGATCCGAGCCTTATCCGGATTTATTGGGTTAAAGGGAGCGTAGATGGATGTTTAAAGTCAAGTGTGAAAGTTT  
GCGGCTCAACCGTAAATTTGAGTTGATACTGGATATCTTGAGTGCAGTTGAGGCAGGCGGAATTCGTGGTGTAGCGGTG  
AAATGCTTAGATATCACGAAGAAGTCCGATTGCGAAGGCAGCTGCTAAGCTGCAACTGACATTGAGGCTCGAAAGTGCG  
GGTAT

>ASV:1848:Genus:Clostridium\_sensu\_stricto\_1

TACGTAGGTGGCGAGCGTTGTCCGGATTTACTGGGCTAAAGGGAGCGTAGGCGGATTTTTAAGTGAGATGTGAAATACT  
CGGGCTTAACCTGAGTGTGCTGCAATTTCAAAGTGAATCTAGAGTGCAGGAGAGGAGAAGGAATTCCTAGTGTAGCGGTG  
AAATGCATAGAGATTAGGAAGAACACCAGTGGCGAAGGCGCTTCTTGACTGTAACGTACGCTGAGGCTCGAAAGCGTG  
GGGAG

>ASV:1849:Genus:Faecalibacterium

AACGTAGGTCAACAGCGTTGTCCGGAATTTACTGGGTGTAAGGGAGCGCAGGCGGGAGAACCAAGTTGGAAGTGAATCCA  
TGGGCTTAACCCATGAAGTGTCTTTCAAAGTGTCTTTCTTGAGTAGTGCAGAGGTAGGCGGAATTCCTGGTGTAGCGGTG  
GAATGCGTAGATATCCGGAGGAACACCAGTGGCGAAGGCGGCTTACTGGGCACCAACTGACGCTGAGGCTCGAAAGTGCG  
GGTAG

>ASV:1850:Genus:Ruminococcaceae\_UCG-005

TACGTAGGGAGCAAGCGTTGTCCGGATTTACTGGGTGTAAGGGCGGTAGGCGGAGTTACAAGTCAAGTGTGAAATCTG  
GGGGCTCAACCCCAAAGTGCATTTGAAACTGTAGCCCTTGAGTATCGGAGAGGCGAGGCGGAATTCCTAGTGTAGCGGTG  
AAATGCGTAGATATTAGGAGGAACACCAGTGGCGAAGGCGGCTGCTGGACGACAACGTACGCTGATGCGCGAAAGCGTG  
GGGAG

>ASV:1851:Genus:Corynebacterium

TACGTAGGGTCCGAGCGTTGTCCGGAATTTACTGGGCTAAAGAGCTCGTAGGTGGTTTGTCCGCTGCTGTGAAATCC  
GGGGCTTAACCTCGGGCGTGCAGGCGATACGGGCATAACTTGAGTGTGTAGGGGAGACTGGAATTCCTGGTGTAGCGGTG  
GGAATGCGCAGATATCAGGAGGAACACCAGTGGCGAAGGCGAGTCTCTGGGCAGTAACGTACGATGAGGAGCGAAAGCAT  
GGGGA

>ASV:1852:Genus:Moheibacter

TACGGAGGGTCAAGCGTTATCCGGATTTACTGGGTTAAAGGGTCCGAGGCGGGCTTGTAAAGTCAAGGGTGAAGGCCG  
ACAGCTTAACCTGCGAAGTGCCTTTGATACTGCAAGTCTTGAGTAAGGTTGAAGTAGCTGGAATGTGTAGTGTAGCGGTG  
AAATGCTTAGATATTACAGAGAACCAGATAGCGAAGGCGAGTCTTAAAGTCTTAACTGACGCTGAGGAGCGAAAGCGTG  
GGGAG

>ASV:1853:Family:Beutenbergiaceae

TACGTAGGGCGCAAGCGTTGTCCGGAATTTACTGGGCTAAAGAGCTCGTAGGCGGTTTGTCCGCTGCTGTGAAATCCC  
CAGGCTCAACCTGGGGCGTGCAGTGGGTACGGGCAGACTAGAGTGCAGTGGGAGACTGGAATTCCTGGTGTAGCGGTG  
GAATGCGCAGATATCAGGAGGAACACCAGTGGCGAAGGCGGCTTCTGGGCCGTTACTGACGCTGAGGAGCGAAAGCATG  
GGGAG

>ASV:1854:Genus:GCA-900066225

TACGTAGGTGGCAAGCGTTGTCCGGAATTTACTGGGTGTAAGGGAGCGTAGGCGGGAAGATAAGTTGGACGTTTAACTTA  
TCGGCTCAACCGATAATCGCGTTCAAAGTGTCTTTCTTGAGTGAAGTAGAGGTAAGCGGAATTCCTAGTGTAGCGGTG  
AATGCGTAAATATTAGGAGGAACACCAGTGGCGAAGGCGGCTTACTGGGCTTAACTGACGCTGAGGCTCGAAAGCGTG  
GTAGC

>ASV:1855:Family:Lachnospiraceae

TACGTATGGTCAAGCGTTATCCGGATTTACTGGGTGTAAGGGAGCGTAGACGGATGTGCAAGTCTGGAGTGAAAACCC  
GGGGCTCAACCCGGGACTGCTTTGAAACTGTGTATCTAGAGTGTGGAGAGGCAAGTGAATTCCTAGTGTAGCGGTG  
AAATGCGTAGATATTAGGAGGAACACCAGTGGCGAAGGCGGCTTCTGGACAGTAACGTACGCTTGGGCTCGAAAGCGTG  
GGGAG

>ASV:1856:Family:Lachnospiraceae

TACGTAGGGGGCAAGCGTTATCCGGATTTACTGGGTGTAAGGGAGCGTAGACGGCATGGCAAGTCTGAAGTGAAAAACCC  
GGGGCTCAACCTGGGACTGCTTTGAAACTGTCAAGCTAGAGTGCAGGAGAGGTAAGTGAATTCCTAGTGTAGCGGTG  
AAATGCGTAGATATTAGGAGGAACACCAGTGGCGAAGGCGGCTTACTGGACTGTAACGTACGCTTGGGCTCGAAAGCGTG  
GGGAG

>ASV:1857:Genus:Holdemanela  
TACGTAGGTGGCGAGCGTTATCCGGAATGATTGGGCGTAAAGGGTGCCTAGGTGGCAGATCAAGTCTGGAGTAAAAGGTA  
TGGGCTCAACCCATACTGGCTCTGAAACTGATCAGCTAGAGAACAGAAGAGGACGGCGGAATCCATGTGTAGCGGTAA  
AATGCGTAGATATATGGAAGAACACCGGTGGCGAAGGCGGCCCTCTGGTCTGGATTCTGACACTGAAGCACGAAAGCGTG  
GGGAG

>ASV:1858:Genus:Parabacteroides  
TACGGAGGATCCGAGCGTTATCCGATTATTGGGTTTAAAGGGTGCCTAGGCGGCCTCTTAAGTCAGCGGTGAAAGTCT  
TGGGCTCAACCCATAGAAATGCGCTTGAAGTGGGGGCTTGGATGTTTGGAGGAGGCGGAATGCGTGGTGTAGCGGTG  
AAATGCTTAGATATACGAAGAATCCGATTGCGAAGGCGCCCTGCTAAGCTGCAACTGACATTGAGGCTCGAAAGTGTG  
GGTAT

>ASV:1859:Genus:Holdemania  
TACGTAGGTGGCGAGCGTTATCCGGAATTATTGGGCGTAAAGGGTGCCTAGGCGGCTTTATTAAGTTAAGGTGAAAGCGT  
GGGGCTTAACCCATATAGCCTTAGAAACTGATAGACTAGAGTACAGGAGAGGCAATGGAATTCATGTGTAGCGGTAA  
AATGCGTAGATATAGGAGAACACAGTGGCGAAGGCGGTTGCCTGGCCTGTAAGTACGCTCATGCACGAAAGCGTGG  
GGAG

>ASV:1860:Genus:Parvimonas  
TACGTATGGGCGAGCGTTGTCGGAATTATTGGGCGTAAAGGGTACGTAGGCGGTCTATTAAGTCAGGTGTGAAAGCGT  
GAGGCTTAACCCATAGAACTGCACTTGAAGTGGGGGCTTGGATGTTTGGAGGAGGAAAGTGAATTCCTAGTGTAGCGGTG  
AATGCGTAGATATTAGGAGGAATACCGGTGGCGAAGGCGACTTTCTGGACTTTTACTGACGCTCAGGTACGAAAGCGTGG  
GGAG

>ASV:1861:Genus:Faecalibacterium  
AACGTAGGTCAACAAGCGTTGTCGGAATTACTGGGTGTAAGGGAGCGCAGGCGGGAAGACAAGTTGGAAGTGAATCCA  
TGGGCTCAACCCATAGAACTGCACTTGAAGTGGGGGCTTGGATGTTTGGAGTGTGACAGGAGGCGGAATTCCTAGTGTAGCGGTG  
GAATGCGTAGATATCGGAGGAATACAGTGGCGAAGGCGCCCTACTGGGCACCAACTGACGCTGAGGCTCGAAAGTGTG  
GGTAG

>ASV:1862:Genus:Ruminococcaceae\_UCG-007  
TACGTAGGTGGCAAGCGTTGTCGGAATTACTGGGTGTAAGGGGCGCTAGGCGGGAGCGCAAGTCAGATGTGAAATCTA  
TGGGCTTAACCCATAAAGTGCATTTGAAACTGTGCTTCTTGGATGTCGAGAGGCGAGGCGGAATTCCTAGTGTAGCGGTG  
AAATGCGTAGATATTAGGAGGAACACAGTGGCGAAGGCGCCCTGCTGGACGACAAGTACGCTGAGGCGGAAAGCGTG  
GGGAG

>ASV:1863:Species:formigenes  
TACGTAGGGTGCAGCGTTAATCGGAATTACTGGGCGTAAAGCGTGCAGGCGGTTGTGTAAGACAGATGTGAAATGCC  
CGGGCTCAACCTGGGAATTGCATTTGTGACTGCACGGCTAGAGTGTGTGACAGGGGGGTAGAATTCACGCTGTAGCAGTG  
AAATGCGTAGATATGTGGAGGAATACCGATGGCGAAGGCGCCCTGGGATAACACTGACGCTCATGCACGAAAGCGTG  
GGGAG

>ASV:1864:Species:bouvetii/calcoaceticus/haemolyticus/johnsonii/schindleri  
TACAGAGGGTGCAGCGTTAATCGGATTTACTGGGCGTAAAGCGTGCCTAGGCGGCTTTTAAAGTCCGATGTGAAAGTCC  
TGAGCTTAACCTAGGAATTGCATTCGATACTGAAAGCTAGAGTATGGGAGAGGATGGTAGAATTCAGGTGTAGCGGTG  
AAATGCGTAGATCTGGAGGAATACCGATGGCGAAGGCGCCCTACTGGCTAATACTGACGCTGAGGTACGAAAGCATG  
GGGAG

>ASV:1865:Genus:GCA-900066575  
TACGTAGGGGGCAAGCGTTATCCGGATTTACTGGGTGTAAGGGAGCGTAGGCGGCGATGCAAGTCAGAAGTAAAAGGCC  
GGGGCTCAACCTCGGGACTGCTTTTGAAGTGTATTGCTAGATTGCAGGAGAGGTAAGTGAATTCCTAGTGTAGCGGTG  
AAATGCGTAGATATTAGGAGGAACACAGTGGCGAAGGCGGCTTACTGGACTGTAATGACGCTGAGGCTCGAAAGCGTG  
GGGAG

>ASV:1866:Family:Lachnospiraceae  
TACGTATGGAGCAAGCGTTATCCGGATTTACTGGGTGTAAGGGTGCCTAGGTGGCAGTGAAGTCAAGTCAAGTGTGAAAGTCC  
GGGGCTTAACCCGAGCTGCATTTGAAACTGCTCGGCTAGAGTACAGGAGAGGCGAGGCGGAATTCCTAGTGTAGCGGTG  
AAATGCGTAGATATTAGGAGGAACACAGTGGCGAAGGCGGCTGCTGGACTGTTACTGACACTGAGGCACGAAAGCGTG  
GGGAG

>ASV:1867:Genus:Bifidobacterium  
TACGTAGGGCGCAAGCGTTATCCGGATTTATTGGGCGTAAAGGGCTCGTAGGCGGCTCGTCCGCTCCGGTGTGAAAGTCC  
ATCGCTTAACGGTGGATCTGCGCCGGTACGGGCGGCTGGAGTGCCTAGGGGAGACTGGAATTCCTAGTGTAGCGGTG  
GAATGCTTAGATATCGGGAAGAACACCGATAGCGAAGGCGAGTCTCTGGGCCCTCAGTACGCTGAGGAGCGAAAGCGTG  
GGGAG

>ASV:1868:Genus:Roseburia  
TACGTATGGTGCAGCGTTATCCGGATTTACTGGGTGTAAGGGAGCGCAGGCGGAAGGCTAAGTCTGATGTGAAAGGCC  
GGGGCTCAACCCGGTACTGCATTGAAACTGGTCACTAGAGTGTGAGGAGGTAAGCGGAATTCCTAGTGTAGCGGTG  
AAATGCGTAGATATTAGGAGGAACACAGTGGCGAAGGCGGCTTACTGGACGATAACTGACGCTGAGGCTCGAAAGCGTG  
GGGAG

>ASV:1869:Genus:Anaerostipes  
TACGTAGGGGGCAAGCGTTATCCGGAATTACTGGGTGTAAGGGTGCCTAGGTGGTATGGCAAGTCAAGTGAAGTAAAACCC  
AGGGCTTAACCTGAGGACTGCTTTTGAAGTGTGACTGGAGTGCAGGAGAGATAAGCGGAATTCCTAGTGTAGCGGTG  
AAATGCGTAGATATTAGGAGGAACATCAGTGGCGAAGGCGGCTTACTGGACTGAAACTGACACTGAGGCACGAAAGCGTG  
GGGAG

>ASV:1870:Genus:Pseudomonas  
TACAGAGGGTGAAGCGTTAATCGGAATTACTGGGCGTAAAGCGCGCTAGGTGGTGTGTAAGTTGGATGTGAAAGTCC  
CGGGCTCAACCTGGGAATGCATTCAAAAGTACTGACTAGAGTATGGTAGAGGGTGGTGAATTCCTGTGTAGCGGTG

AAATGCGTAGATATAGGAAGAACACCAGTGGCGAAGGCGACCACCTGGACTAATACTGACACTGAGGTGCGAAAGCGTG  
GGAG  
>ASV:1871:Family:Christensenellaceae  
TACGTAGGGAGCAAGCGTTGTCCGGAATTACTGGGCGTAAAGGGTGCCTAGGCGGTTGCTTAAGTCAGATGTGAAATACT  
CGGGCTCAACTCGGGGCTGCATCTGATACTGGGTAAGTGCAGGAGAGGAAAGTGAATTCTAGTGTAGCGGTG  
GAATGCGTAGATATTAGGAGAACACCAGTGGCGAAGGCGACTTTCTGGACTGTAAGTACGCTGAGGCACGAAAGTATG  
GGTAG  
>ASV:1872:Family:Family\_XIII  
TACGTAGGGGCGAGCGTTATCCGGAATTATTGGGCGTAAAGAGTACGTAGGCGGTTTTTTAAGCGAGGGGTATAAGGCA  
GCGGCTTAACGTCTGTTGGCCCTCGAACTGGAGGACTTGAGTGTGCGAGAGGAAAGCGGAATTCTAGTGTAGCGGTGA  
AATGCGTAGAGATTAGGAGAACACCAGTGGCGAAGGCGGCTTTCTGGACGGCAACTGACGCTGAGGTACGAAAGCGTGG  
GGAGC  
>ASV:1873:Genus:Tyzzerella  
TACGTAGGGGCGAAGCGTTATCCGGAATTACTGGGTGTAAGGGAGCGTAGGCGGCATGGTAAGCCAGATGTGAAAGCCC  
GAGGCTTAACCTCGAGGATTGCATTTGGAATATCAAGCTAGAGTACAGGAGAGGAAAGCGGAATTCTAGTGTAGCGGT  
GAAATGCGTAGATATTAGGAAGAACACCAGTGGCGAAGGCGGCTTTCTGGACTGAAACTGACGCTGAGGCTCGAAAGCGT  
GGGA  
>ASV:1874:Family:Muribaculaceae  
TACGGAGGATGCGAGCGTTATCCGATTATTGGGTTAAAGGGTGCCTAGGCGGTCGGTAAGTCAGCGGTTAAACTGC  
GGAGCTCAACTCCGTATTGCCGTTGAAACTGCCGCTTGTAGTGGGCGAGAAGTATCGGAATGCGTGGTGTAGCGGTGA  
AATGCATAGATATCAGCAGAACTCCGATTGCGAAGGCGAGCATAACCGCGCCCTACTGACGCTGAAGCACGAAAGCGTGG  
GTATC  
>ASV:1875:Genus:Lachnospiraceae\_UCG-010  
TACGTAGGGGCGAAGCGTTATCCGGAATTACTGGGTGTAAGGGAGCGTAGGCGGCACGCCAAGCCAGATGTGAAAGCCC  
GAGGCTTAACCTCGCGGATTGCATTTGGAATGCGGAGCTAGAGTACAGGAGAGGAAAGCGGAATTCTAGTGTAGCGGT  
GAAATGCGTAGATATTAGGAGAACACCAGTGGCGAAGGCGGCTTTCTGGACTGAAACTGACGCTGAGGCTCGAAAGCGT  
GGGA  
>ASV:1876:Genus:Clostridium\_sensu\_stricto\_1  
TACGTAGGTGGCGAGCGTTGTCCGATTACTGGGCGTAAAGGGAGCGTAGGCGAGATTTTTAAGTGAGATGTGAAATACT  
CGGGCTTAACCTGAGTGTGATTTCAAAGTCTAGAGTGCAGGAGAGGAGAAGGGAATTCTAGTGTAGCGGTG  
AAATGCGTAGAGATTAGGAAGAACACCAGTGGCGAAGGCGCTTCTCTGGACTGTAAGTACGCTGAGGCTCGAAAGCGTG  
GGGAG  
>ASV:1877:Genus:Micrococcus  
TACGTAGGGTGCAGCGTTATCCGGAATTATTGGGCGTAAAGAGCTCGTAGGAGGTTTGTCCGCTGTCGCGTAAAGTCC  
GGGGCTTAACCTCCGATCTGCGGTGGGTACGGGCGAGCTAGAGTGCAGTAGGGGAGACTGGAATTCTGGTGTAGCGGTG  
GAATGCGCAGATATCAGGAGAACACCAGTGGCGAAGGCGAGTCTCTGGGCTGTAAGTACGCTGAGGAGCGAAAGCATG  
GGGAG  
>ASV:1878:Genus:Peptostreptococcus  
TACGTAGGGGCTAGCGTTATCCGATTACTGGGCGTAAAGGGTGCCTAGGTTGCTTCAAGTCCGTGGTTAAAGGCT  
ACGGCTCAACCGTAGTAAGCCGCCGAAACTGGAGAATTTGAGTGCAGGAGAGGAAAGTGAATTCCAGTGTAGCGGTGA  
AATGCGTAGATATTGGGAGAACACCAGTAGCGAAGGCGGCTTTCTGGACTGCAACTGACACTGAGGACGAAAGCGTGG  
GTAGC  
>ASV:1879:Species:timonensis  
TACGTAGGGAGCAAGCGTTATCCGATTATTGGGCGTAAAGCGCGCTAGGCGGCTGTTAAGCGGAATCTCTAATCTG  
AGGGCTCAACCCAGCCGATTCCGAACTGGCAGGCTCGAGTTTGGTAGAGGAAAGTGAATTCCAGTGTAGCGGTGA  
AATGCGCAGATATTGGGAAGAACACCAGTGGCGAAGGCGAGTCTCTGGGCCAACACTGACGCTGAGGTGCGAAAGCTAGG  
GGAGC  
>ASV:1880:Family:Lachnospiraceae  
TACGTAGGGGCGAAGCGTTATCCGATTACTGGGTGTAAGGGAGCGTAGACGGCATGCAAGTCTGAAGTGAATCCC  
GGGGCTCAACCCCGGTGCTGCTTTGAAACTGTTAGGCTAGAGTGTGGAGAGGTAAGTGAATTCTAGTGTAGCGGTG  
AAATGCGTAGATATTAGGAGAACACCAGTGGCGAAGGCGGCTTACTGGACAGTAACTGACGTTGAGGCTCGAAAGCGTG  
GGGAG  
>ASV:1881:Genus:Alistipes  
TACGGAGGATTCAAGCGTTATCCGATTATTGGGTTAAAGGGTGCCTAGGCGGTTAGATAAGTTAGAGGTGAAATACC  
GGTGCTTAACCCGAACTGCCTAATACTGTTAGCTAGAGAATAGTTGCGGTAGGCGGAATGTATGGTGTAGCGGTG  
AAATGCTTAGAGATCATACAGAACACCAGTGGCGAAGGCGAGTACCAGAACTATATCTGACGTTGAGGCACGAAAGCGTG  
GGGAG  
>ASV:1882:Genus:Christensenellaceae\_R-7\_group  
TACGTAGGGGCGAGCGTTGTCCGGAATTACTGGGCGTAAAGGGCGTGTAGGCGGCTTTTTAAGTCTGGAGTAAAGCCC  
CATTTCAAGGTGGGAGTGTCTTTGGAGACTGGAGAGCTTGAAGTGCAGGAGAGGTAAGTGAATTCCAGTGTAGCGGTG  
AAATGCGTAGAGATTGGGAGAACACCAGTGGCGAAGGCGACTTACTGGGCCGTAAGTACGCTGAGGCGCGAAAGCGTG  
GGGAG  
>ASV:1883:Order:Bacteroidales  
TACGGAGGATCCGAGCGTTATCCGATTATTGGGTTAAAGGGAGCGTAGATGGATGTTAAGTCAAGTGTGAAAGTTT  
GCGGCTCAACCGTAAATTTGAGTGTGATACTGGCAGTCTTGAAGTGCAGTACAGGCAAGCGGAATTCTAGTGTAGCGGTG  
AAATGCGTAGATATTAGGAGAACACCAGTGGCGAAGGCGGCTTGTGGGCTTTTACTGACGCTGAGGCTCGAAAGCGTG  
GGGAG  
>ASV:1884:Genus:Parabacteroides

TACGGAGGATCCGAGCATTATCCGGATTTATTGGGTTAAAGGGTGCCTAGGCGGCCTTTAAGTCAGCGGTGAAAAGTCT  
GTGGCTCAACCATAGAAATTGCCGTTGAAACTGGGAGGCTTGGATGTTTGGAGCAGGCGGAATGCGTGGTGTAGCGGTG  
AAATGCTTAGATATCACGCAGAACCCCGATTGCCAAGGCAGCGCACCCGGCCCAACTGACGCTGAGGCACGAAAGTGCG  
GGGAT

>ASV:1885:Genus:Sporomusa

TACGTAGGTGGCAAGCGTTGTCCGGAATTATTGGGCGTAAAGGGCGCTAGGTGGATCATTAAGTCTTGGATCTAAGAGC  
GGTGCTCAACGCCGTATAGGCGCAGGAAACTGGAGATCTTGGATGCAAGGAGGAAAGCGGAATCCAGTGTAGCGGTG  
AAATGCGTAGATATTGGGAGGAACACCAGTGGCGAAGGCGGCTTTCTGGACTGTGTGACACTGAGGCAGAAAGCCAG  
GGGAG

>ASV:1886:Genus:Faecalibacterium

AACGTAGGTCAACGCGTTGTCCGGAATTACTGGGTGTAAGGGAGCGCAGGCGGGAAGACAAGTTGGAAGTAAAATCTA  
TGGGCTCAACCCATAAACTGCTTTCAAAGCTTTTTCTTGGATAGTGCAGAGGTAGGCGGAATCCCGGTGTAGCGGTG  
GAATGCGTAGATATCCGGAGGAATACCAGTGGCGAAGGCGGCTACTGGGCACCAACTGACGCTGAGGCTCGAAAGTGTG  
GGTAG

>ASV:1887:Genus:Megasphaera

TACGTAGGTGGCAAGAGTTGTCCGGAATTATTGGGCGTAAAGGGCGCGCAGGCGGCATCGCAAGTCCGTCTTAAAAGTGC  
GGGGCTTAACCCGTGAGGGGACCGAAACTGTGAAGCTCGAGTGTGCGAGAGGAAAGCGGAATCCCTAGTGTAGCGGTG  
AAATGCGTAGATATTAGGAGGAACACCAGTGGCGAAGGCGGCTTTCTGGACGACAAGTACGCTGAGGCGGAAAGCCAGG  
GGAGC

>ASV:1888:Genus:Subdoligranulum

AACGTAGGTGGCAAGCGTTGTCCGGAATTACTGGGTGTAAGGGAGCGCAGGCGGACCGCAAGTTGGAAGTAAAACCA  
TGGGCTTAACCCGTGAATTGCTTTCAAAGCTGCTGGCCTTGGATAGTGCAGAGGTAGGTGGAATCCCGGTGTAGCGGTG  
GAATGCGTAGATATCCGGAGGAACACCAGTGGCGAAGGCGACCTACTGGGCACCAACTGACGCTGAGGCTCGAAAGCATG  
GGTAG

>ASV:1889:Genus:Butyricicoccus

TACGTAGGGAGCAAGCGTTATCCGGATTTACTGGGTGTAAGGGCGCGCAGGCGGGTCCGCAAGTTGGAAGTAAAATCTA  
TGGGCTTAACCCATAAACTGCTTTCAAAGCTGCTGGCTTGGATGATGGAGAGGCGAGCGGAATCCGTGTGTAGCGGTG  
AAATGCGTAGATATACGGAGGAACACCAGTGGCGAAGGCGGCTTCTGGACATTAAGTACGCTGAGGCGGAAAGCCGTG  
GGGAG

>ASV:1890:Species:arlettae/cohnii/gallinarum/kloosii/saprophyticus

TACGTAGGTGGCAAGCGTTATCCGGATTTACTGGGTGTAAGGGCGCGCAGGCGGGTCCGCAAGTTGGAAGTAAAATCTA  
ACGGCTCAACCGTGGAGGGTATTGAAACTGGGAGACTTGGATGCAAGAGGAAAGTGAATCCATGTGTAGCGGTG  
AAATGCGCAGAGATATGGAGGAACACCAGTGGCGAAGGCGGCTTCTGGTCTGTAAGTACGCTGAGGCGGAAAGCCGTG  
GGGAT

>ASV:1891:Genus:Actinomyces

TACGTAGGGCGCAGCGTTGTCCGGAATTATTGGGCGTAAAGGGCTTGTAGGCGGTTGGCCGCTGCTGCGGTGAAATCCT  
CTGGCTTAACCTGGGGCGTGCCTGGTACGGGCTGCTTGGATGCGGTAGGGGAGACTGGAATCCCTGGTGTAGCGGTG  
GAATGCGCAGATATCAGGAGGAACACCAGTGGCGAAGGCGGCTTCTGGCCGTTACTGACGCTGAGGAGCGAAAGCCGTG  
GGGAG

>ASV:1892:Species:asaccharolyticus/grossensis/harei

TACGTAGGGGCTAGCGTTGTCCGGAATCACTGGGCGTAAAGGGTTCGAGGCGGAAATGCAAGTCAAGTGTAAAAGGCA  
GTAGCTTAACCTAGGAACTGTAAGCATTTGAAACTGCATATCTTGGAAAGTGAAGGTAAGTGAATTTTTAGTGTAGCGGTG  
AAATGCGTAGATATTAAGAAATAACCGTGGCGAAGGCGACTTACTGGGCTCATTCTGACGCTGAGGAACGAAAGCCGTG  
GTAGC

>ASV:1893:Species:acidaminiphila/humi/maltophilia/pavanii

TACGAAGGGTGAAGCGTTACTCGGAATTACTGGGCGTAAAGCGTGCCTAGGTGGTGGTCTTAAAGTCCGTTGTGAAAGCCC  
TGGGCTCAACCTGGGAAGTGCAGTGGATACTGGGCGACTAGGTGTTGGTAGAGGTAAGCGGAATCCCTGGTGTAGCAGTG  
AAATGCGTAGAGATCAGGAGGAACACCAGTGGCGAAGGCGACTTACTGGACCAACTGACACTGAGGCACGAAAGCCGTG  
GGGAG

>ASV:1894:Genus:Family\_XIII\_AD3011\_group

TACGTAGGGGGCAAGCGTTATCCGGAATTATTGGGCGTAAAGAGTACGTAGGTGGTTACCTAAGCACGGGGTATAAGGCA  
ATGGCTCAACCATTTGCTTGTGAACTGGGCTACTTGGATGCGAGGAGGAAAGCGGAATCCCTAGTGTAGCGGTG  
AAATGCGTAGATATTAGGAGGAACACCAGTGGCGAAGGCGGCTTTCTGGACTGTAAGTACACTGAGGTACGAAAGCCGTG  
GGAGC

>ASV:1895:Genus:Family\_XIII\_AD3011\_group

TACGTAGGGGGCAAGCGTTATCCGGAATTATTGGGCGTAAAGAGTGCCTAGGTGGTTACCTAAGCGCGGGTAAAAGGCA  
ATGGCTTAACCATTTGTTAGCCCTGCGAACTGGGCTACTTGGATGCGAGGAGGAAAGCGGAATCCCTAGTGTAGCGGTG  
AAATGCGTAGATATTAGGAGGAACACCAGTGGCGAAGGCGGCTTTCTGGACTGTAAGTACACTGAGGCACGAAAGCCGTG  
GGAGC

>ASV:1896:Family:Lachnospiraceae

TACGTAGGGGGCAAGCGTTATCCGGAATTACTGGGTGTAAGGGAGCGTAGACGGAATGGCAAGTCTGATGTAAAAGGCC  
GGGGCTCAACCCCGGACTGCAATGGAACTGTCAATCTAGAGTACCGGAGGGGTAAGTGAATCCCTAGTGTAGCGGTG  
AAATGCGTAGATATTAGGAGGAACACCAGCGGCGAAGGCGGCTTACTGGACGGTAACTGACGTTGAGGCTCGAAAGCCGTG  
GGGAG

>ASV:1897:Genus:Blautia

TACGTAGGGGGCAAGCGTTATCCGGAATTACTGGGTGTAAGGGAGCGTAGACGAGCGGCAAGTCTGAAAGTAAAAGGCA  
GGGGCTCAACCTCTGGACTGCTTTGAAACTGTCCATCTAGAGTACCGGAGAGGTAAGCGGAATCCCTAGTGTAGCGGTG  
AAATGCGTAGATATTAGGAGGAACACCAGTGGCGAAGGCGGCTTACTGGACGGTAACTGACGTTGAGGCTCGAAAGCCGTG

GGGAG

>ASV:1898:Genus:Paraprevotella

TACGGAAGATGCGAGCGTTATCCGGATTTATTGGGTTTAAAGGGAGCGTAGGCGGGCTTTTAAAGTCAGCGGTCAAATGTC  
GTGGCTCAACCATGTCAAGCCGTTGAAACTGTAAGCCTTGAGTCTGCACAGGGCACATGGAATTCGTGGTGTAGAGGTGA  
AATGCTTAGATATCACGAAGAACTCCGATCGCAAGGCATTGTGCCGGGCATAACTGACGCTGAGGCTCGAAAGTCCGG  
GTATC

>ASV:1899:Family:Ruminococcaceae

TACGTAGGGAGCGAGCGTTGTCCGGAATTACTGGGTGTAAGGGTGCCTAGGCGGGATAGCAAGTCAGGCGTAAATCCA  
TCGGCTTAACCGGTGAAGTGCCTGAACTGTAATTCCTGAGTGAAGTAGAGGCAGGCGGAATTCGAGTGTAGCGGTG  
AAATGCGTAGATATTCGGAGGAACACCAGTGGCGAAGGCGGCTGCTGGCTTTTACTGACGCTGAGGCACGAAAGCATG  
GGGAG

>ASV:1900:Family:Lachnospiraceae

TACGTATGGAGCAAGCGTTATCCGGATTTACTGGGTGTAAGGGTGCCTAGGTTGGCAGTGAAGTCAGATGTGAAAGGCC  
GGGGCTCAACCCCGGAGCTGCATTTGAACTGCATAGCTAGAGTACAGGAGAGGCAGGCGGAATTCCTAGTGTAGCGGTG  
AAATGCGTAGATATTAGGAGGAACACCAGTGGCGAAGGCGGCTTCTGGACTGTTACTGACACTGAGGCACGAAAGCGTG  
GGGAG

>ASV:1901:Family:Lachnospiraceae

TACGTATGGTCAAGCGTTATCCGGATTTACTGGGTGTAAGGGAGCGTAGACGGAGAGGCAAGTCTGATGTGAAAACCC  
GGGGCTCAACCCCGGACTGCATTGAACTGCTTTTCTAGAGTGTCCGGAGAGGTAAGTGAATTCCTAGTGTAGCGGTG  
AAATGCGTAGATATTAGGAGGAACACCAGTGGCGAAGGCGGCTTACTGGACTGTTACTGACACTGAGGCACGAAAGCGTG  
GGGAG

>ASV:1902:Species:tertium

TACGTAGGTGGCGAGCGTTGTCCGGATTTACTGGGCTAAAGGGAGCGTAGGCGGACTTTTAAAGTGAGATGTAAATACC  
CAGGCTCAACCTGGGGCTGCATTTCAAAGTCTAGAGTGCAGGAGAGGAGTGAATTCCTAGTGTAGCGGTG  
AAATGCGTAGAGATTAGGAAGAACACCAGTGGCGAAGGCGACTCTCTGGACTGTAACGACGCTGAGGCTCGAAAGCGTG  
GGGAG

>ASV:1903:Genus:Lachnospiraceae\_UCG-004

TACGTAGGGGGCAAGCGTTATCCGGATTTACTGGGTGTAAGGGAGCGTAGACGGGATACAAGTCTGAAGTAAATACC  
CGGGCTCAACCTGGAACTGCTTTGAACTGTGTTGCTAGAGTGTGGAGAGGTAAGCGGAATTCCTAGTGTAGCGGTG  
AAATGCGTAGATATTAGGAAGAACACCAGTGGCGAAGGCGGCTTACTGGACGATAACTGACGCTGAGGCTCGAAAGCGTG  
GGGAG

>ASV:1904:Family:Lachnospiraceae

TACGTAGGGGGCAAGCGTTATCCGGATTTACTGGGTGTAAGGGAGCGTAGACGGTAATACAAGTCTGAAGTAAAGGCC  
GGGGCTCAACCCGGAAGTGCATTTGAACTGTATACTAGAGTACCGGAGGGTAAGCGGAATTCCTAGTGTAGCGGTG  
AAATGCGTAGATATTAGGAGGAACACCAGTGGCGAAGGCGGCTTACTGGACGTAACGACGCTGAGGCTCGAAAGCGTG  
GGGAG

>ASV:1905:Family:Lachnospiraceae

TACGTAGGGGGCAAGCGTTATCCGGATTTACTGGGTGTAAGGGAGCGTAGACGGCAGCAAGTCTGAAGTAAATCCC  
CGGGCTCAACCCGGAAGTGCATTTGAACTGCTGGCTGGAGTGTGGAGAGGCAAGCGGAATTCCTAGTGTAGCGGTG  
AAATGCGTAGATATTAGGAGGAACACCAGTGGCGAAGGCGGCTTACTGGACGATAACTGACGCTGAGGCTCGAAAGCGTG  
GGGAG

>ASV:1906:Genus:Lachnoclostridium

TACGTAGGGGGCAAGCGTTATCCGGATTTACTGGGTGTAAGGGAGCGTAGACGGCGCTGCAAGTCTGGAGTAAAGGCC  
GGGGCTCAACCCGGGACTGCTTTGAACTGTAGAGCTAGAGTGTGGAGAGGTAAGCGGAATTCCTAGTGTAGCGGTG  
AAATGCGTAGATATTAGGAGGAACACCAGTGGCGAAGGCGGCTTACTGGACGATAACTGACGCTGAGGCTCGAAAGCGTG  
GGGAG

>ASV:1907:Genus:Ruminococcus\_1

TACGTAGGGAGCGAGCGTTGTCCGGAATTACTGGGTGTAAGGGAGCGTAGGCGGGATCGCAAGTCAGATGTGAAAACCTA  
TGGGCTTAACCCATAAACTGCATTTGAACTGTGTTTCTGAGTGAAGTAGAGGTAAGCGGAATTCCTAGTGTAGCGGTG  
AAATGCGTAGATATTAGGAGGAACACCAGTGGCGAAGGCGGCTTCTGGACTGTTACTGACACTGAGGCACGAAAGCGTG  
GGGAG

>ASV:1908:Genus:Thermicanus

TACGTAGGGGGCGAGCGTTGTCCGGAATGATTGGGCGTAAAGCGCGCAGGCGGCTCTTTAAGTCTGATGTAAAAGCCC  
GCGGCTTAACCGCGAAGGTCAATTGAACTGGGGACTTGAAGGCTAGGAGAGGGAAGTGAATTCCTGGTGTAGCGGTG  
AAATGCGTAGAGATCAGGAGGAATACCGATGGCGAAAGCAACTTCTGGCTAGAGCTGACGCTGAGGCGGAAAGCGTG  
GGGAG

>ASV:1909:Genus:Dielma

TACGTAGGTGGCAAGCGTTATCCGGAATTATTGGGCGTAAAGGGTGCCTAGGCGGCTGGATAAGTCTGAGGTAAAAGCCC  
GTGGCTCAACCCAGGTAAGCCTTGGAACTGTCTGGCTGGAGTGCAGGAGAGGACAATGGAATTCCTAGTGTAGCGGTAA  
AATGCGTAGATATTAGGAGGAACACCAGTGGCGAAGGCGGTTGTCTGGCTGTAACGACTGAGGACGAAAGCGGTG  
GGAGC

>ASV:1910:Order:Gastraerophilales

TACGGAGGGTCAAGCGTTGTCCGGAATCATTGGGCGTAAAGAGTTCGTAGGCGCATGTCAAGTCCGGTGTAAATCCT  
GAGGCTCAACCTCAGACCGGCACTGGATACTGGCAAGCTTGAATGCGGTAGAGGTAAGGGAATTCCTGGTGTAGCGGTG  
AAATGCGTAGATATCAGGAAGAACACCAGTGGCGTAAGCGCTTACTGGCCGTTATTGACGCTGAGGAACGAAAGCCGG  
GGGAG

>ASV:1911:Genus:Bacteroides

TACGGAGGATCCGGCGTTATCCGGATTTATTGGGTTTAAAGGGAGCGTAGGCGGACGCTTAAGTCAGTTGTGAAAGTTT

GCGGCTCAACCGTAAAATTGCAAGTGTACTGGGTGCTTGGTACAGTAGAGGCAGCGGAATTCGTGGTGTAGCGGTG  
AAATGCTTAGATATCACGAAGAACTCCGATTGCGAAGGCAGCCTGCTGGACTGTAACGACGCTGATGCTCGAAAGTGTG  
GGTAT

>ASV:1912:Genus:Lachnoclostridium  
TACGTAGGGGGCAAGCGTTATCCGGATTTACTGGGTGTAAGGGGAGCGTAGACGGTAAAGCAAGTCTGAAGTAAAGCCC  
GGGGCTCAACCCGGGACTACTTTGAAACTGTTAACTAGAGTGTGGAGAGGTAAGCGGAATTCCTAGTGTAGCGGTG  
AAATGCGTAGATATTAGGAGGAACACCAGTGGCGAAGGCGGCTTACTGGACGTAACGACGTTGAGGCTCGAAAGCGTG  
GGGAG

>ASV:1913:Genus:Streptococcus  
TACGTAGGTCCCAGCGTTGTCCGGATTTATTGGGCGTAAAGCGAGCGCAGGCGGTTAATAAGTCTGAAGTAAAGGCA  
GTGGCTTAACCATTTGTCGCTTTGAAACTGTAGACTTGTAGTGCAGAAAGGGAGAGTGAATTCATGTGTAGCGGTGA  
AATGCGTAGATATTAGGAGGAACACCAGTGGCGAAGTGGCTCTCTGGTCTGTAACGACGCTGAGGCTCGAAAGCGTG  
GGAGC

>ASV:1914:Genus:Porphyromonas  
TACGGGGGATGCGAGCGTTATCCGGAATTATTGGGTTAAAGGGTGCAGGTGGCTAATCAGGTGAGTGGTAAAAGCT  
ATGGCTCAACCATGGTCTTGCATTGAAACCGTATAGCTAGAGAGGAGACGAGGTAGCGGAATGTGTGGTGTAGCGGTG  
AAATGCGTAGATATCACACAGAACCTCCGATTGCGAAGGCAGCTTACCAGGCTTTATCTGACACTTAGGCACGACAGCGTG  
GGGAT

>ASV:1915:Genus:Porphyromonas  
TACGGAGGATACGAGCGTTATCCGGATTTATTGGGTTAAAGGGTGCAGGTGGCTCTGCAAGTCAAGTGGTAAAAGCT  
GAGGCTCAACCTCAGCCTTGCCTTAAACTGCAAGACTTGTAGAGTACATGATGTGGGCGGAATGCGTAGTGTAGCGGTG  
AAATGCGTAGATATTACGAGAACCTCCGATTGCGAAGGCAGCTCACAAAGGTATGTCTGACACTGAGGCACGAAAGCGTG  
GGGAG

>ASV:1916:Genus:Akkermansia  
TACAGAGGTCTCAAGCGTTGTCGGAATCACTGGGCGTAAAGCGTGCCTAGGCTGTTTCGTAAGTCTGTGTAAAAGGCA  
GGGGCTCAACCCCTGGATTGCACATGATACTGCGAGACTAGAGTAATGGAGGGGAACCGGAATTCCTGGTGTAGCAGTG  
AAATGCGTAGATATCGAGAGGAACACTCGTGGCGAAGGCGGTTCTTGACATTAACGACGCTGAGGCACGAAAGCCAG  
GGGAG

>ASV:1917:Species:atrinae  
TACGTAGGGTCAAGCGTTGTCCGGAATTATTGGGCGTAAAGAGCTCGTAGGCGGTTTGTCCGCTGCTGTGAAATCCC  
GAGGCTCAACCTCGGGCGTGCAGTGGGTACGGGCAGACTGGAGTGCCTAGGGGAGAATGGAATTCCTGGTGTAGCGGTG  
GAATGCGCAGATATCAGGAGGAACACCAGTGGCGAAGGCAGTTCTCTGGCCGTAACGACGCTGAGGAGCGAAAGCGTG  
GGGAG

>ASV:1918:Genus:Christensenellaceae\_R-7\_group  
TACGTAGGGGGCGAGCGTTGTCCGGAATGACTGGGCGTAAAGGGCGTGTAGGCGGCTTTTTAAGTGTGGAGTAAAAGTCC  
ACTTTTCAAGGGTGAATTTGCTTTGCAGACTGGAGAGCTTGTAGTGCAGGAGAGGTAAGTGAATTCACAGTGTAGCGGTG  
AAATGCGTAGAGATTGGGAGGAACACCAGTGGCGAAGGCAGCTTACTGGCCGTAACGACGCTGAGGCGCGAAAGCGTG  
GGGAG

>ASV:1919:Order:Bacteroidales  
TACGGAGGATCCGAGCGTTATCCGGATTTATTGGGTTAAAGGGTGCCTAGGCGGAACCTCAAGTCAAGCGGTAAAAATTC  
GGGGCTCAACCCCGTGCCTGTTGAAACTGGAGTCTTGTAGTGGGCGAGAAGTATGCGGAATGCGTGGTGTAGCGGTGA  
AATGCTTAGATATCACGAAGAACTCCGATTGCGAAGGCAGCTTGTCTGGACTGTAACGACGCTGATGCTCGAAAGTGTGG  
GTATC

>ASV:1920:Genus:Anaerostipes  
TACGTAGGGGGCAAGCGTTATCCGGAATTACTGGGTGTAAGGGTGCCTAGGTGGTATGGCAAGTCAAGTAAAACCC  
AGGGCTTAACCTTGGGACTGCTTTTAAACTGTCAGACTGGAGTGCAGGAGAGGTAAGCGGAATTCCTAGTGTAGCGGTG  
AAATGCGTAGATATTAGGAGGAACACTAGTGGCGAAGGCGGCTTACTGGACTGAAACTGACACTGAGGCACGAAAGCGTG  
GGGAG

>ASV:1921:Genus:Tumebacillus  
TACGTAGGGGGCAAGCGTTGTCCGGATTCGCTGGGCGTAAAGCGCGCAGGCGGTTGATGTAAGTCTGAGGTAAAACCC  
GAAGCTCAACTTCGGGACTGCCTTGGATACTGCGTCACTTGGAGATAGGAGAGGCAAGGGGAATTCACGCTGAGCGGTG  
AAATGCGTAGAGATGTTGGAGGAACACTGTGGCGAAGGCGCCTTGTCTGGCTATTTCTGACGCTGAGGCGCGAAAGCGTG  
GGGAG

>ASV:1922:Genus:Subdoligranulum  
AACGTAGGGTGAAGCGTTGTCCGGAATTACTGGGTGTAAGGGGAGCGCAGGCGGACCAGGCAAGTTGGAAGTAAAACCTA  
TGGGCTCAACCCATAAATTGCTTTCAAAGTGTGGCCTTGTAGTGTGAGAGGTAAGTGAATTCCTGGTGTAGCGGTG  
GAATGCGTAGATATCGGGAGGAACACCAGTGGCGAAGGCGACCTACTGGGTACCAACTGACGCTGAGGCTCGAAAGCATG  
GGTAG

>ASV:1923:Family:Christensenellaceae  
TACGTAGGGAGCAAGCGTTGTCCGGAATTACTGGGCGTAAAGGGTGCCTAGGCGGCGGTTAAGTCAAGTGTGAAATACC  
CGTGTAAACATGGGGGTGCATCTGATACTGGCGTCTTGTAGTGCAGGAGAGGAAAGCGGAATTCCTAGTGTAGCGGTG  
AAATGCGTAGATATTAGGAGGAACACCAGTGGCGAAGGCGGCTTCTGGACTGTAACGACGCTGAGGCACGAAAGCGTG  
GGGAG

>ASV:1924:Genus:Acholeplasma  
TACATAGGGGGCGAGCGTTATCCGGAATTATTGGGCGTAAAGGGTGCCTAGGCGGCTATTTAAGTCTTTGGTGTAAAGTGC  
AGTGCTTAACGCTGTGATGCTAAGGAAACTGGATAGCTAGAGTGTAGATAGAGGCAAGTGAATTCATGTGTAGCGGTAA  
AATGCGTAAATATATTAGGAGGAACACCAGTGGCGAAGGCGGCTTGTCTGGTCTATACTGACGCTGATGCACGAAAGCGTG  
GGAGC

>ASV:1925:Genus:Oscillibacter  
TACGTAGGTGGCAAGCGTTGTCCGGATTTACTGGGTGTAAAGGGCGTGTAGCCGGGTGTGCAAGTCAGATGTGAAATCTG  
GAGGCTCAACCTCCAACCTGCATTTGAAACTGTGCATCTTGAGTATCGGAGAGGTAATCGGAATTCCTTGTGTAGCGGTG  
AAATGCGTAGATATAAGGAAGAACCACAGTGGCGAAGGCGGATTACTGGACGACAACGACGGTGTAGGCGCGAAAGCGTG  
GGGAG

>ASV:1926:Species:omnicolens  
TACGTAGGGTGCAGCGTTGTCCGGAATTTATGGGCGTAAAGAGCTCGTAGGCGGTTTGTCCGCTCTGGTGTGAAAGTCC  
ATCGCTCAACCTGGATTGGCGTGGTACGGGCGAGCTAGAGTGTAGTAGGGGAGACTGGAATTCCTCGGTGTACCGGTG  
GAATGTGTAGATATCGGAAGAACCACCAATGGCGAAGGCGAGTCTCTGGGCTATTACTGACGCTGAGGAGCGAAAGCGTG  
GGGAG

>ASV:1927:Genus:Family\_XIII\_AD3011\_group  
TACGTAGGGGGCAAGCGTTATCCGGAATTTATGGGCGTAAAGAGTGCCTAGGTGGTTACCTAAGCAGGGGGTGAAGGCA  
ATGGCTCAACCTGATTGTTAGCCCTGCATTGAAACTGTTGATCTGGAGTGCCGGAGAGGTAAGCGGAATTCCTAGTGTAGCGGTG  
AATGCGTAGATATTAGGAGGAACACCAGTGGCGAAGGCGGCTTTCTGGACTGTTACTGACACTGAGGCACGAAAGCGTGG  
GGAG

>ASV:1928:Genus:Dorea  
TACGTAGGGGGCAAGCGTTATCCGGATTTACTGGGTGTAAAGGGAGCGTAGACGGCACGGCAAGCCAGATGTGAAAGCCC  
GGGGCTCAACCCCGGACTGCATTTGAACTGCTGAGCTAGAGTGTCCGGAGAGGCAAGTGAATTCCTGGTGTAGCGGTG  
AAATGCGTAGATATTAGGAGGAACACCAGTGGCGAAGGCGGCTTCTGGACGATGACTGACGTTGAGGCTCGAAAGCGTG  
GGGAG

>ASV:1929:Family:Lachnospiraceae  
TACGTAGGGGGCAAGCGTTATCCGGAATTTACTGGGTGTAAAGGGAGCGTAGACGGAGCAGCAAGTCTGATGTGAAAACCC  
GGGGCTCAACCCCGGACTGCATTTGAAACTGTTGATCTGGAGTGCCGGAGAGGTAAGCGGAATTCCTAGTGTAGCGGTG  
AAATGCGTAGATATTAGGAGGAGCACCAGTGGCGAAGGCGGCTTACTGGACGTAAGTACGTTGAGGCTCGAAAGCGTG  
GGGAG

>ASV:1930:Genus:Parabacteroides  
TACGGAGGATCCGAGCGTTATCCGGATTTATGGGTTTAAAGGGTGCCTAGGCGGCTTTTAAAGTACGCGGTGAAAGTCT  
GTGGCTCAACCTAGAATTGCCGTTGAACTGGGAGGCTTGGAGTATGTTTGGAGCAGCGGAATGCGTGGTGTAGCGGTG  
AAATGCTTAGATATCACGAAGAACCAGTGGCGAAGGCGGCTTACTGGACTGTAAGTACGCTGATGCTCGAAAGTGTG  
GGTAT

>ASV:1931:Genus:Butyricimonas  
TACGGGGGATCCGAGCGTTATCCGGATTTATGGGTTTAAAGGGCGCTAGGCGGGACGCCAAGTACGCGGTGAAAGACT  
GCAGCTAAACTGTAGCACGCGGTTGAAACTGGCGACCTGGAGACGAGACGAGGAGGCGGAACAAGTGAAGTAGCGGTGA  
AATGCTTAGATATCACTTGAACCCCGATAGCGAAGGCGGCTTCCAGGCTCGGTCTGACGCTGATGCGCGAGAGCGGTG  
GTAGC

>ASV:1932:Genus:Ruminococcaceae\_UCG-008  
TACGTAGGGAGCAAGCGTTATCCGGATTTACTGGGTGTAAAGGGCGAGTAGGCGGGCTGGTAAGTTGGAAGTGAATCCC  
GGGGCTTAACCCCGAAGTGTCTTCAAACCTGCTGTTGAGTGTAGGAGGCGAGGCGGAATTCCTAGTGTAGCGGTG  
AAATGCGTAGATATTGGGAGGAACACCAGTGGCGAAGGCGGCTTCTGGACATTAAGTACGCTGAGGAGCGAAAGCGTG  
GGGAG

>ASV:1933:Genus:Blautia  
TACGTAGGGGGCAAGCGTTATCCGGATTTACTGGGTGTAAAGGGAGCGTAGACGGACTGGAAGTCTGATGTGAAAGGCG  
GGGGCTCAACCCCTGGACTGCATTGAAACTGTTAGTCTTGGAGTGCAGGAGAGGTAAGCGGAATTCCTAGTGTAGCGGTG  
AAATGCGTAGATATTAGGAGGAACACCAGTGGCGAAGGCGGCTTACTGGACGTAAGTACGCTTGGGCTCGAAAGCGTG  
GGGAG

>ASV:1934:Genus:Cloacibacterium  
TACGGAGGGTGCAGCGTTATCCGGATTTATGAGTTTAAAGGGTCCGTAGGCGGACTTATAAGTCAAGTGTGAAATCCT  
GTCCGTTAACGATAGAAGTGCATTGATACTGTAAGTCTTGGAGTATTTGAGGTAGCTGGAATAAGTGTAGCGGTG  
AAATGCATAGATATTACTTAGAACACCAATTGCGAAGGCGGTTACCAAGATATAAGTACGCTGAGGAGCGAAAGCGTG  
GGGAG

>ASV:1935:Genus:Ruminiclostridium\_5  
TACGTAGGGAGCGAGCGTTGTCCGGATTTACTGGGTGTAAAGGGTGCCTAGGCGGCGAGGCAAGTACGCGGTGAAATCTA  
TGGGCTTAACCCATGAAGTGCCTTGAACCTGTTTGGCTTGGAGTGAAGTAGAGGTAGGCGGAATTCCTGGTGTAGCGGTG  
AAATGCGTAGAGATCGGGAGGAACACCAGTGGCGAAGGCGGCTTACTGGGCTTAAAGTACGCTGAAGCACGAAAGCATG  
GGTAG

>ASV:1936:Genus:Ruminococcaceae\_NK4A214\_group  
TACGTAGGGAGCAAGCGTTATCCGGATTTACTGGGTGTAAAGGGCGCTAGGCGGGATGGAAGTCAAGTGTGAAATCTC  
AGGGCTCAACCTGAACTGCATTTGAAACTGTGCTTCTTGGAGTACTGGAGAGGTTGACGGAATTCCTAGTGTAGCGGTG  
AAATGCGTAGATATTAGGAGGAACACCAGTGGCGAAGGCGGTTCAACTGGACAGCAACTGACGCTGAGGCGCGAAAGCGTG  
GGGAG

>ASV:1937:Genus:Lachnospiraceae\_UCG-004  
TACGTAGGGGGCGAGCGTTATCCGGATTTACTGGGTGTAAAGGGAGCGTAGACGGCGATGCAAGTCTGAAGTGAAGGCC  
CGGGCTCAACCTGGTACTGCTTTGAAACTGTATGGCTAGAGTGTGGAGAGGTAAGCGGAATTCCTAGTGTAGCGGTG  
AAATGCGTAGATATTAGGAGGAACACCAGTGGCGAAGGCGGCTTACTGGACAGTAAAGTACGCTTGGGCTCGAAAGCGTG  
GGGAG

>ASV:1938:Genus:Rikenellaceae\_RC9\_gut\_group  
TACGGGGGATCCGAGCGTTATCCGGATTTATGGGTTTAAAGGGTGCCTAGGCGGCAATTAAGTACGCGGTGAAAGACC  
GGGGCTCAACCTGGAAGTCCGTTGATACTGATTGGCTAGAATACCCTTCCGCTGGGAGGAATGAGTGGTGTAGCGGTG

AAATGCATAGATATCACTCAGAACACCGATTGCGAAGGCATCTCACGAAGGGGAGATTGACGCTGAGGCACGAAAGCGTG  
GGGAT  
>ASV:1939:Family:Lachnospiraceae  
TACGTAGGGGGCAAGCGTTATCCGGATTTACTGGGTGTAAGGGAGCGTAGACGGCGCTGCAAGTCTGGAGTGAAAGCCC  
GGGGCTCAACCCCGGACTGCTTTGAAACTGCAGGGCTAGAGTGTGGAGAGGTAAGCGGAATTCCTAGTGTAGCGGTG  
AAATGCGTAGATATTAGGAGGAACACCAAGTGGCGAAGGCGGCTTACTGGACAGTAACGACGTTGAGGCTCGAAAGCGTG  
GGGAG  
>ASV:1940:Genus:Parabacteroides  
TACGGAGGATGCGAGCGTTATCCGGATTTATTGGGTTAAAGGGTGCCTAGGTGGTATTAAAGTACGCGGTGAAAGTTT  
GTGGCTCAACCATAAAATTGCCGTTGAAACTGGGTTACTTGAGTGTGTTTGGAGTAGCGGAATGCGTGGTGTAGCGGTG  
AAATGCATAGATATCACGCAGAACTCCAATTGCGAAGGCAGCTTACTAACTATAACGACACTGAAGCACGAAAGCGTG  
GGGAT  
>ASV:1941:Genus:Fusicatenibacter  
TACGTAGGGGGCAAGCGTTATCCGGATTTACTGGGTGTAAGGGAGCGTAGACGGCAAGGTAAGTCTGATGTGAAACCC  
AGGGCTTAACCTGGGACTGCATTGAAACTGTCTGGCTCGAGTGCAGGAGAGGTAAGCGGAATTCCTAGTGTAGCGGTG  
AAATGCGTAGATATTAGGAAGAACACCAAGTGGCGAAGGCGGCTTACTGGACGTAACGACGTTGAGGCTCGAAAGCGTG  
GGGAG  
>ASV:1942:Genus:Parasutterella  
TACGTAGGGTGCAGCGTTAATCGGAATTACTGGGCGTAAAGGGTGCAGGCGGTTGAGTAAGACAGATGTGAAATCCC  
CAAGCTTAACCGGGAATGGCATATGTGACTGCTCGACTAGAGTGTGTGAGAGGAGGTGGAATTCACGTTGAGCAGTG  
AAATGCGTAGATATTGGAAGAACACCGATGGCGAAGGCAGCCTCTGGGACATAACTGACGCTCAGGCACGAAAGCGTG  
GGGAG  
>ASV:1943:Family:Lachnospiraceae  
TACGTATGGGGCAAGCGTTATCCGGATTTACTGGGTGTAAGGGAGCGTAGGCGGCATGGCAAGTCAAGAGTAAAGCCT  
GGGGCTCAACCCCGGAATTGCTTTTAAACTGTCAGGCTAGAGTGTGCGAGGGGTAAGCGGAATTCCTAGTGTAGCGGTG  
AAATGCGTAGATATTAGGAGGAACACCGTGGCGAAGGCGGCTTACTGGACGATTACTGACGCTGAGGCTCGAAAGCGTG  
GGGAG  
>ASV:1944:Genus:Moryella  
TACGTAGGGGGCAAGCGTTATCCGGATTTACTGGGTGTAAGGGAGCGCAGACGGCTATGCAAGTCTGAAGTAAAGCCC  
GGGGCTCAACCCCGGATTGCTTTGAAACTGTGTAGCTAGAGTGTGCGAGAGGTAAGCAGAATTCACAGTGTAGCGGTG  
AAATGCGTAGATATTGGAAGAATACCGTGGCGAAGGCGGCTTACTGGACGATAACTGACGTTGAGGCTCGAAAGCGTG  
GGGAG  
>ASV:1945:Genus:Veillonella  
TACGTAGGTGGCAAGCGTTGTCGGGAATTATTGGGCGTAAAGCGCGCAGGCGGATCAGTCAAGTCTGTCTTAAAGTTC  
GGGGCTTAACCCCGTATGGGATGAAACTGCTGATCTAGAGTATCGGAGAGGAAAGTGAATTCCTAGTGTAGCGGTGA  
AATGCGTAGATATTAGGAGGAACACCAAGTGGCGAAGGCGGCTTACTGGACGTAACGACGTTGAGGCTCGAAAGCGTG  
GGAGC  
>ASV:1946:Family:Ruminococcaceae  
TACGTAGGGAGCGAGCGTTGTCGGGAATTACTGGGTGTAAGGGAGCGTAGGCGGAAAGCAAGTTGGAAGTGAATGCA  
TGGGCTTAACCCATGAGCTGCTTTCAAACCTGCTTTTCTTGAAGTGAAGTAGAGGCAGGCGGAATTCCTAGTGTAGCGGTG  
AAATGCGTAGATATTAGGAGGAACACCAAGTGGCGAAGGCGGCTGCTGGGCTTAACTGACGCTGAGGCTCGAAAGCGTG  
GGTAG  
>ASV:1947:Genus:Parabacteroides  
TACGGAGGATCCGAGCGTTATCCGGATTTATTGGGTTAAAGGGTGCCTAGGCGGCTTTTAAAGTACGCGGTGAAAGTCT  
GTGGCTCAACCATAGAATTGCCGTTGAAACTGGGGGCTTGAAGTATGTTTGAAGGAGGCGGAATGCGTGGTGTAGCGGTG  
AAATGCTTAGATATCACGCAGAACCCGATGGCGAAGGCAGCCTGCCAAGCCATGACTGACGCTGATGACGAAAGCGTG  
GGGAT  
>ASV:1948:Genus:Hyphomicrobium  
TACGAAGGGGCTAGCGTTGTTCCGGGAATTACTGGGCGTAAAGCGCACGTAGGCGGATTTGTAAGTACAGGGGTGAAATCCC  
GGGGCTCAACCTCGGAAGTGCCTTTGATACTGCAAGTCTCGAGTCCGGAAGAGGTGAGTGAATTCCTAGTGTAGAGGTG  
AAATTCGTAGATATTAGGAAGAACACCAAGTGGCGAAGGCGGCTCACTGGTCCGGTACTGACGCTGAGGTGCGAAAGCGTG  
GGGAG  
>ASV:1949:Family:Lachnospiraceae  
TACGTATGGGGCAAGCGTTATCCGGATTTACTGGGTGTAAGGGAGCGTAGGCGGCATGGCAAGTCAAGAGTAAAGCCT  
GGGGCTCAACCCCGGAATTGCTTTTAAACTGTCAGGCTAGAGTGTGCGAGGGGTAAGCGGAATTCCTAGTGTAGCGGTG  
AAATGCGTAGATATTAGGAGGAACATCAGTGGCGAAGGCGGCTTACTGGGCTTAACTGACGCTGAGGCTCGAAAGCGTG  
GGGAG  
>ASV:1950:Genus:Christensenellaceae\_R-7\_group  
TACGTAGGGGGCAAGCGTTGTTCCGGGAATAATTGGGCGTAAAGGGCGCTAGGCGGCTCGGTAAGTCTGGAGTAAAGTCC  
TGCTTTTAAAGTGGGAATTGCTTTGATACTGTCGGGCTTGAAGTGCAGGAGAGGTTAGTGAATTCACAGTGTAGCGGTG  
AAATGCGTAGAGATTGGGAGGAACACCAAGTGGCGAAGGCGACTAACTGGACTGTAACGACGCTGAGGCGCGAAAGTGTG  
GGGAG  
>ASV:1951:Genus:Ruminococcaceae\_UCG-005  
TACGTAGGGAGCGAGCGTTGTCGGGATTTACTGGGTGTAAGGGCGTGTAGGCGGAGATGCAAGTCAAGAGTGAATCTG  
GGGGCTCAACCCCAAAGTGCCTTTGAAACTGTATCCCTTGAAGTATCGGAGAGGCAGGCGGAATTCCTAGTGTAGCGGTG  
AAATGCGTAGATATTAGGAGGAACACCAAGTGGCGAAGGCGGCTGCTGGACGACAACGACGCTGAGGCGCGAAAGCGTG  
GGGAG  
>ASV:1952:Genus:GCA-900066225



TACGTAGGTGGCAAGCGTTGTCCGGAATTACTGGGTGTAAAGGGAGCGTAGGCGGGGATACAAGTTGAATGTTAAACTA  
TGGGCTCAACCCATAGTTGCGTTCAAACCTGTATTTCTTGAGTGAAGTAGAGGTAAGCGGAATTCCTAGTGTAGCGGTGA  
AATGCGTAAATATTAGGAGGAACACCAGTGGCGAAGCGGCTTACTGGGCTTTAACTGACGCTGAGGCTCGAAAGCGTGG  
GTAGC

>ASV:1953:Genus:Methylobacterium

TACGAAGGGGGCTAGCGTTGTCCGGAATCACTGGGCGTAAAGGGCGCGTAGGCGGCGTGAAGTTGGGGGTGAAAGCCT  
GTGGCTCAACCACAGAATTGCTTCGATACTGGGACGCTTGAAGTGTGGTAGAGGTTGGTGGAACTGCGAGTGTAGAGGTG  
AAATTCGTAGATATTCGCAAGAACACCAGTGGCGAAGCGGCCAACTGGACCATCACTGACGCTGAGGCGCGAAAGCGTG  
GGGAG

>ASV:1954:Genus:Candidatus\_Soleaferrea

TACGTAGGTGGCGAGCGTTGTCCGGAATTACTGGGTGTAAAGGGAGCGTAGGCGGGAAGACAAGTTGAATGTGAAATCTA  
TCGGCTCAACCGGTAGCTGCGTTCAAACCTGTATTTCTTGAGTGAAGTAGAGGCAGGCGGAATTCCTAGTGTAGCGGTGA  
AATGCGTAGATATTAGGAGGAACACCAGTGGCGAAGCGGCTGCTGGGCTTTTACTGACGCTGAGGCTCGAAAGCATGG  
GTAGC

>ASV:1955:Genus:Ruminococcaceae\_UCG-010

TACGTAGGTGGCAAGCGTTATCCGGATTTATTGGGTGTAAAGGGTGAGTAGGCGGGCTGACAAGTCAGATGTGAAATGTT  
CAGGCTTAACCTGAGAACTGCATTTGAAACTGCCAGTCTTGAGAGTCGGAGGGGTAATCGGAATTCCTGGTGTAGCGGTG  
AAATGCGTAGAGATTCGGGAGGAACACCAGTGGCGAAGCGGCTTACTGGACGACAACCTGACGCTGATACACGAAAGCGTG  
GGGAG

>ASV:1956:Genus:Faecalibacterium

AACGTAGGTCAACAGCGTTGTCCGGAATTACTGGGTGTAAAGGGAGCGCAGGCGGGAAGGCAAGTTGGAAGTAAATCCA  
TGGGCTCAACCCATGAGCTGCTTTCAAACCTGTTTTCTTGAGTAGTGCAGAGGTAGGCGGAATTCCTGGTGTAGCGGTG  
GAATGCGTAGATATTCGGGAGGAACACCAGTGGCGAAGCGGCTTACTGGGCACCAACTGACGCTGAGGCTCGAAAGTGTG  
GGTAG

>ASV:1957:Genus:Anaerostipes

TACGTAGGGGGCAAGCGTTATCCGGAATTACTGGGTGTAAAGGGTGCGCAGGTGGTATGGCAAGTCAGAAGTGAAAACCC  
AGGGCTTAACCTGAGACTGCTTTTGAACCTGCAGACTAGAGTGCAGGAGAGGTAGCGGAATTCCTAGTGTAGCGGTG  
AAATGCGTAGATATTAGGAGGAACCATCAGTGGCGAAGCGGCTTACTGGACTGAAACTGACACTGAGGCACGAAAGCGTG  
GGGAG

>ASV:1958:Genus:Lachnospira

TACGTATGGAGCAAGCGTTATCCGGAATTACTGGGTATAAAGGGAGTGTAGGTGGCCATGCAAGTCAGAAGTGAAAATCC  
GGGCTCAACCCGGAACCTGCTTTTGAACCTGAAGGCTGGAGTGCAGGAGGGGTAGTGGAAATTCCTAGTGTAGCGGTG  
AAATGCGTAGATATTAGGAGGAACACCAGTGGCGAAGCGGCTCACTGGACTGTAACCTGACACTGAGGCTCGAAAGCGTG  
GGGAG

>ASV:1959:Genus:Bacteroides

TACGGAGGATCCGAGCGTTATCCGGAATTATTGGGTTTAAAGGGAGCGTAGATGGGTTGTTAAGTCAGTTGTGAAAGTTT  
GCGGCTCAACCCGGAACCTGCTTTTGAACCTGAAGGCTGGAGTGCAGGAGGGGTAGTGGAAATTCCTAGTGTAGCGGTG  
AAATGCTTAGATATCAGGAAGAATCCGATTGCGAAGGCAGCTTACTGGATTGTAACCTGACGCTGATGCTCGAAAGTGTG  
GGTAT

>ASV:1960:Genus:Blautia

TACGTAGGGGGCAAGCGTTATCCGGAATTACTGGGTGTAAAGGGAGCGTAGACGGTGTAGCAAGTCTGATGTGAAAGGCA  
TGGGCTCAACCTGTGGACTGCATTGGAAACTGTCATACTTGAAGTGCAGGAGGGTAAGCGGAATTCCTAGTGTAGCGGTG  
AAATGCGTAGATATTAGGAGGAACACCAGTGGCGAAGCGGCTTACTGGACGGTAACTGACGTTGAGGCTCGAAAGCGTG  
GGGAG

>ASV:1961:Species:hominis

TACGGAGGTGCAAGCGTTACTCGGAATCACTGGGCGTAAAGGGTGCGTAGGTGGATTATCAAGTCTCTTGTGAAATCTA  
ATAGCTTAACCTATTAATGCTTGGGAAACTGATAGTCTAGAGTAGGGAGAGGCAGATGGAACCTTGGTGTAGGAGTA  
AAATCCGTAGATATCAAGAAGAATACCTATTGCGAAAGCGATCTGCTAGAACCTAACTGACACTGATGCACGAAAGCGTG  
GGGAG

>ASV:1962:Genus:Christensenellaceae\_R-7\_group

TACGTAGGGGGCAAGCGTTGTCCGGAATAATTGGGCGTAAAGGGCGCGTAGGCGGCTCGGTAAGTCTGGAGTAAAAGTCC  
TGCTTTTAAAGTGGGAATTCCTTTGGATACTGGCGGCTTGAAGTGCAGGAGAGGTTAGTGGAAATTCCTAGTGTAGCGGTG  
AAATGCGTAGAGATTGGGAGGAACACCAGTGGCGAAGGCAGCTAACTGGACTGTAACCTGACGCTGAGGCGCGAAAGTGTG  
GGGAG

>ASV:1963:Kingdom:Bacteria

AACGTAGGTCAACAGCGTTGTCCGGAATTACTGGGTGTAAAGGGAGCGTAGGCGGGAGAAACAAGTTGGAAGTAAATCCA  
TGGGCTCAACCCATGAACTGCTTTCAAACCTGTTTTCTTGAGTAGTGCAGAGGTAGGCGGAATTCCTGGTGTAGCGGTG  
AAATGCTTAGATATCAGGAAGAATCCGATTGCGAAGGCAGCTCACTGGACTGCAACTGACACTGATGCTCGAAAGTGTG  
GGTAT

>ASV:1964:Genus:Staphylococcus

CACGTAGGTGGCAAGCGTTATCCGGAATTATTGGGCGTAAAGCGCGCTAGGCGGTTTTTTAAGTCTGATGTGAAAGGCC  
ACGGCTCAACCGTGGAGGGTATTGGAGACTGGAAAACCTTGAAGTGCAGAGGTAAGTGGAAATTCCTAGTGTAGCGGTG  
AAATGCGCAGAGATATGGAGGAACACCAGTGGCGAAGGCAGCTTCTGGTCTGTAACCTGACGCTGATGTGCGAAAGCGTG  
GGGAT

>ASV:1965:Genus:Christensenellaceae\_R-7\_group

TACGTAGGGGGCGAGCGTTGTCCGGAATGACTGGGCGTAAAGGGCGCGTAGGCGGCGGACTAAGTCTGATGTGAAATACC  
CGCTTTTAAAGTGGGTCGTCATTGGAAACTGGATGGCTAGAGTGCAGGAGGTAAGTGGAAATTCCTAGTGTAGCGGTG  
AAATGCGTAGAGATTGGGAGGAACACCAGTGGCGAAGGCAGCTTACTGGGCCCAACTGACGCTGAGGCGCGAAAGCGTG

GGGAG

>ASV:1966:Genus:Megasphaera

TACGTAGGTGGCAAGCGTTGTCCGGAATTTATTGGGCGTAAAGGGCGCGCAGGCGGCATCGCAAGTCGGTCTTAAAAGTGC  
GGGGCTTAACCCCGTGAAGGGACCGAACTGTGAAGCTCGAGTGTCCGAGAGGAAAGCGGAATTCCTAGTGTAGCGGTGA  
AATGCGTAGATATTAGGAGGAACACCAGTGGCGAAAGCTGCTTTCTGGACGACAACTGACGCTGAGGCGCGAAAGCCAGG  
GGAGC

>ASV:1967:Family:Lachnospiraceae

TACGTAGGGGGCAAGCGTTATCCGGATTTACTGGGTGTAAGGGAGCGTAGACGGCAATGCAAGTCTGGAGTAAAACCC  
GGGGCTTAACCCCGGACTGCTTTGGAACTGTGTAGCTTGTAGTACCGAGGGGTAAGCGGAATTCCTAGTGTAGCGGTG  
AAATGCGTAGATATTAGGAGGAACACCAGTGGCGAAGGCGGCTTACTGGACGGTAACGACGTTGAGGCTCGAAAGCGTG  
GGGAG

>ASV:1968:Genus:Roseburia

TACGTAGGGGGCAAGCGTTATCCGGATTTACTGGGTGTAAGGGAGCGCAGGCGGTGCGGCAAGTCTGATGTAAAAGCC  
GGGGCTCAACCCCGGACTGCATTGAACTGTCTACTTGTAGTATCGGAGAGGTAAGTGAATTCCTAGTGTAGCGGTG  
AAATGCGTAGATATTAGAAGGAACACCAGTGGCGAAGGCGGCTTACTGGACGATAACGACGCTGAGGCTCGAAAGCGTG  
GGGAG

>ASV:1969:Genus:Candidatus\_Soleaferrea

TACGTAGGTGGCAAGCGTTGTCCGGAATTTACTGGGTGTAAGGGAGCGTAGGCGGGAATGCAAGTTGGATGTAAAATACC  
GCAGCTTAACTGCGGGCTGCATCCAAAAGTGTATTTCTTGTAGTGAAGTAGAGGCGAGGCGGAATTCCTAGTGTAGCGGTG  
AAATGCGTAAATATTAGGAGGAACACCAGTGGCGAAGGCGGCTGCTGGGCTTAACTGACGCTGAGGCTCGAAAGCGTG  
GGTAG

>ASV:1970:Genus:Prevotella

TACGGAAGGTCGGGGCTTATCCGGATTTATTGGGTTAAAGGGAGCGTAGGCTGTCTATTAAGCGTGTGTGAAATATA  
CCGGCTCAACCCGGTGGCTTGCAGCGCAACTGGTGCAGCTTGTAGTATGCAGGAAGTAGGCGGAATTCATGGTGTAGCGGTG  
AAATGCTTAGATATCATGACGAACTCCGATTGCGCAGGCAGCTTACTGTAGCATAACGACGCTGATGCTCGAAAGTGGC  
GGTAT

>ASV:1971:Genus:Lachnospira

TACGTATGGAGCAAGCGTTATCCGGATTTACTGGGTGTAAGGGAGTGTAGGTGGCCAGGCAAGTCAAGTGAAGGCC  
GGGGCTCAACCCCTGGGACTGCTTTTGAAGTGCAGGGCTAGAGTGCAGGAGGGGCAAGTGAATTCCTAGTGTAGCGGTG  
AAATGCGTAGATATTAGGAGGAACACCAGTGGCGAAGGCGGCTTGTGGACTGTAACGACACTGAGGCTCGAAAGCGTG  
GGGAG

>ASV:1972:Genus:Prevotella\_6

TACGGAAGGTCGGGGCTTATCCGGATTTATTGGGTTAAAGGGAGTGTAGGCGGCTGTTAAGCGTGTGTGAAATGTA  
GATGCTCAACATCTGAACTGCAGCGCAACTGGCTGGCTTGTAGTACACGCAACGTGGGCGGAATTCATGGTGTAGCGGTG  
AAATGCTTAGATATCATGAAGAACTCCTATTGCGAAGGCAGCTCACGGGAGTGTCACTGACGCTTAAGCTCGAAGGTGGC  
GGTAT

>ASV:1973:Genus:Ruminococcaceae\_UCG-005

TACGTAGGTGGCAAGCGTTGTCCGGAATTTACTGGGTGTAAGGGCGTGTAGGCGGGAAGACAGGTCAGATGTAAAATACC  
GGGGCTCAACCCCGGAGCTGCATTTGAAACCGTTTTTCTTGTAGTATCGGAGAGGCGAGGCGGAATTCCTAGTGTAGCGGTG  
AAATGCGTAGATATTAGGAGGAACACCAGTGGCGAAGGCGGCTTGTGGACTGTAACGACACTGAGGCTCGAAAGCGTG  
GGGAG

>ASV:1974:Genus:Enterococcus

TACGTAGGTGGCAAGCGTTGTCCGGAATTTATTGGGCGTAAAGCGAGCGCAGGCGGCTTTTTAAGTCTGATGTAAAAGCC  
CCGGCTTAACCGGGAGGGTCAATTGAAACTGGGAGACTTGTAGTGCAGAAGAGGAAAGCGGAATTCATGTGTAGCGTTG  
AAATGCGTAGATATTAGGAGGAACACCAGTGGCGAAGGCGGCTTCTGGTCTGTAACGACGCTGAGGCTCGAAAGCGTG  
GGGAG

>ASV:1975:Genus:Cloacibacterium

TATGGAGGGTGAAGCGTTATCCGGATTTATTGGGTTAAAGGGTCCGTAGGCGGACTTATAAGTCAAGTGGTAAAAGCCT  
GTCGCTTAACGATAGAACTGCCATTGATACTGTAAGTCTTGTAGTATTTGAGGTAGCTGGAATAAGTGTAGCGGTG  
AAATGCGTAGATATTACTTAGAACCAATTGCGAAGGCAGGTTACCAAGATATAACTGACGCTGAGGGACGAAAGCGTG  
GGGAG

>ASV:1976:Family:Clostridiales\_vadinBB60\_group

TACGTAGGGGGCAAGCGTTGTCCGGAATGACTGGGCGTAAAGGGTGTGTAGGCGGGCTCGCAAGTTGGATGTGTAATACC  
CAGAGCTTAACTCGGGTGTGCATCTGAAACTACGAGTCTTGTAGTGTCCGAGAGGTAAGTGAATTCCTAGTGTAGCGGT  
GGAATGCGTAGATATTAGGAGGAACATCAGTGGCGAAGGCGGACTTACTGGACGATAACTGACGCTGAGGCGCAAGGCGT  
GGGA

>ASV:1977:Genus:Phascolarctobacterium

TACGTAGGTGGCGAGCGTTGTCCGGAATTTATTGGGCGTAAAGAGCATGTAGGCGGCTTAATAAGTCAAGCGTAAAATGC  
GGGGCTCAACCCCGTATGGCGCTGAAACTGTAGGCTTGGGTGCAGGAGAGGAAAGGGGAATTCCTAGTGTAGCGGTG  
AATGCGTAGATATTGGGAGGAACACCAGTGGCGAAGGCGGCTTTCTGGACTGTGTCTGACGCTGAGATGCGAAAGCCAGG  
GTAGC

>ASV:1978:Genus:Barnesiella

TACGGAGGATGCGAGCGTTATCCGGATTTATTGGGTTAAAGGGTGCCTAGGCGGCACGCCAAGTCAAGCGGTGAAATTC  
CGGGCTCAACCCGAGTGTGCCGTTGAAACTGGCGAGCTAGAGTTACAAGAGGCGAGGCGGAATGCGTGGTGTAGCGGTG  
AAATGCGTAGATATCACGAGAACCCGATTGCGAAGGCAGCCTGCTAGGTTGCGACAGACGCTGAGGCGCAAGGCGTG  
GGTAT

>ASV:1979:Family:Lachnospiraceae

TACGTATGGAGCAAGCGTTATCCGGATTTACTGGGTGTAAGGGTGCCTAGGTGGCGGTGCAAGTCAAGTGTGAAAAGGCC

GGGGCTCAACCCGGAGCTGCATTTGAACTGCATAGCTAGAGTACAGGAGAGGCAGGCCGAATTCCTAGTGTAGCGGTG  
AAATGCGTAGATATTAGGAGGAACACCAGTGGCGAAGGCGGCTGCTGGACTGTTACTGACACTGAGGCACGAAAGCGTG  
GGGAG  
>ASV:1980:Genus:Parasutterella  
TACGTAGGGTGCAGCGTTAATCGGAATTACTGGGCGTAAAGGGTGCAGGCGGTTAGTAAGACAGATGTGAAATCCC  
CGAGCTTAACCTGGGAATGGCATATGTGACTGCTCGACTAGAGTGTGTGAGAGGGAGGTGGAATTCACGTGTAGCAGTG  
AAATGCGTAGATATGTGGAAGAACACCAGTGGCGAAGGCAGCCTCTGGGCGATAACTGACGCTCAGGCACGAAAGCGTG  
GGGAG  
>ASV:1981:Genus:Lachnoclostridium  
TACGTAGGGGGCAAGCGTTATCCGGATTTACTGGGTGTAAGGGAGCGTAGACGGTAAAGCAAGTCTGAAGTAAAGCCC  
GGGGCTCAACCCGGGACTGCTTTGAAACTGTTAACTAGAGTGTGGAGAGGTGAGCGGAATTCCTAGTGTAGCGGTG  
AAATGCGTAGATATTAGGAGGAACACCAGTGGCGAAGGCGGCTTACTGGACAGTAACGACGTTGAGGCTCGAAAGCGTG  
GGGAG  
>ASV:1982:Family:Burkholderiaceae  
TACGTAGGGTGCAGCGTTAATCGGAATTACTGGGCGTAAAGCGTGCAGGCGGTTATATAAGACAGATGTGAAATCCC  
CGGGCTCAACCTGGGAATGCATTTGTGACTGTATAGCTAGAGTACGGCAGAGGGGGATGGAATTCGCGTGTAGCAGTG  
AAATGCGTAGATATGCGGAGGAACACCAGTGGCGAAGGCAATCCACTGGGCTGTACTGACGCTCATGCACGAAAGCGTG  
GGGAG  
>ASV:1983:Genus:Subdoligranulum  
AACGTAGGGTGCAGCGTTGTCCGGAATTACTGGGTGTAAGGGAGCGCAGGCGGACCGGCAAGTTGGAAGTAAAACTA  
TGGGCTCAACCCATAAATTGCTTTCAAACCTGCTGGCCTTGTAGTGTGAGGAGGTAGGTGGAATTCGCGTGTAGCGGTG  
GAATGCGTAGATATGCGGAGGAACACCAGTGGCGAAGGCGACTTACTGGGCACCAACTGACGCTGAGGCTCGAAAGCATG  
GGTAG  
>ASV:1984:Family:Lachnospiraceae  
TACGTATGGTGCAGCGTTATCCGGATTTACTGGGTGTAAGGGAGCGTAGACGGAGTGGCAAGTCTGATGTGAAAACCC  
GGGGCTCAACCCGGAACTGCATTGAAACTGTCAATCTAGAGTACCGGAGAGGTAAGCGGAATTCCTAGTGTAGCGGTG  
AAATGCGTAGATATTAGGAGGAACACCAGTGGCGAAGGCGGCTTACTGGACGGTAACGACGTTGAGGCTCGAAAGCGTG  
GGGAG  
>ASV:1985:Species:lentocellum  
TACGTAGGGAGCGAGCGTTATCCGGATTTACTGGGTGTAAGGGTGCAGGCGGTTTGTAAAGTCAAGTGAATTTA  
GGGGCTCAACCTCTAAGCTGCTTCTGAAACTGATGAACTAGAGTGTGGGAGAGGAAAGTGGAAATTCGAGTGTAGCGGTG  
AAATGCGTAGAGATTCGAGGAACACCAGTAGCGAAGGCGGCTTCTGGACCATAACTGACGCTGAGGCACGAAAGCGTG  
GGGAG  
>ASV:1986:Family:Pedosphaeraceae  
TACAGAGGTCCAAGCGTTGTCCGGATTTACTGGGCGTAAAGGGTGCAGTGGTGGTGGTAAAGTCCGGATGTGAAATCTC  
CGGGCTTAACCCGGAAATGGCATTGAAACTACCTTGTAGAGGATTTGAGGGGGGATTGGAATACTTGGTGTAGCAGTG  
AAATGCGTAGATATCAAGTGGAAACACCAGTGGCGAAGGCGAATCCCTGGAAAATACCTGACACTGAGGCACGAAAGCTAG  
GGGAG  
>ASV:1987:Family:Peptococcaceae  
TACGTAGGGAGCGAGCGTTGTCCGGAATTACTGGGCGTAAAGGGCGTGTAGGCGGGATTTAAGTAGGGTGTGAAAACCTC  
CGGGCTTAACCTGGAGACTGCACCCTAAACTGGATCTCTTGGAGGCGAGGAGGAAAGTGGAAATTCCTAGTGTAGCGGTG  
AAATGCGTAGATATTAGGAGGAACACCAGTGGCGAAGGCGACTTCTGGACTGTACCTGACGCTGAGGCGCGAAAGCGTG  
GGGAG  
>ASV:1988:Species:dechangensis/flava/himachalensis/polaris/rosea/sediminis/turfanensis  
TACGTAGGGCGCAAGCGTTGTCCGGAATTTGGGCGTAAAGAGCTCGTAGGCGGTTTGTGCGCTGCTGCTGTGAAAGCCC  
GGGGCTCAACCCGGGTCTGCAGTGGGTACGGGCAGACTAGAGTGCAGTAGGGGAGACTGGAATTCCTGGTGTAGCGGTG  
AAATGCGCAGATATCAGGAGGAACACCAGTGGCGAAGGCGAGTCTCTGGGCTTACTGACGCTGAGGAGCGAAAGCATG  
GGGAG  
>ASV:1989:Species:segnis  
TACGGAGGGTGCAGCGTTAATCGGAATAACTGGGCGTAAAGGGCACGCAGGCGGCTATTTAAGTGAAGTGTGAAATCCC  
CGGGCTTAACCTGGGAATGCATTTAGACTGGTGTAGACTTTAGGGAGGGGTAGAATTCACGTGTAGCGGTG  
AAATGCGTAGAGATGTGGAGGAATACCGAAGGCGAAGGCGAGCCCTTGGGAATGTACTGACGCTCATGTGCGAAAGCGTG  
GGGAG  
>ASV:1990:Family:Enterobacteriaceae  
TACGGAGGGTGCAGCGTTAATCGGAATTACTGGGCGTAAAGCGCACGCAGGCGGCTGTCAAGTCCGATGTGAAATCCC  
CGGGCTCAACCTGGGAATGCATTCGAAACTGGCAGGCTTGTAGTCTTGTAGAGGGGGTAGAGTTCAGGTGTAGCGGTG  
AAATGCGTAGAGATCTGGAGGAATACCGGTGGCGAAGGCGGCCCTTGGACAAGACTGACGCTCAGGTGCGAAAGCGTG  
GGGAG  
>ASV:1991:Species:aeruginosa/entomophila/fluorescens/fulva/guariconensis/knackmussii/mevalonii/  
monteilii/parafulva/plecoglossida/putida/taiwanensis  
TACAGAGGGTGCAGCGTTAATCGGAATTACTGGGCGTAAAGCGCGCTAGGTGGTTCTGTTAAGTTGGATGTGAAAGCCC  
CGGGCTCAACCTGGGAATGCATTCGAAACTGGCAGACTAGAGTACGGTAGAGGGTGGTGGAAATTCCTGTGTAGCGGTG  
AAATGCGTAGATATAGGAAGGAACACCAGTGGCGAAGGCGACCCTGGACTGATACTGACACTGAGGTGCGAAAGCGTG  
GGGAG  
>ASV:1992:Genus:Ruminiclostridium\_9  
TACGTAGGTGGCAAGCGTTATCCGGATTTACTGGGTGTAAGGGCGTGTAGGCGGGATGGTAAAGTCAAGTGTGAAATCCC  
AGGGCTCAACCTGGACTGCATTTGAAACTATCGTTCTTGTAGTGTGGAGAGGCGAGCGGAATTCCTGTGTAGCGGTG  
AAATGCGTAGATATTAGGAGGAACACCAGTGGCGAAGGCGGCTGCTGGACATTAACGACGCTGAGGCGCGAAAGCGTG

GGGAG

>ASV:1993:Genus:Subdoligranulum

AACGTAGGGTGCAAGCGTTGTCCGGAATTACTGGGTGTAAGGGGAGCGCAGGCGGGCATGCAAGTTGGAAGTAAAACTA  
TGGGCTCAACCCATAGCCTGCTTTCAAACCTGCGTGTCTTCTGAGTAGTGCAGAGGTAGCGGGAATTCCTAGTGTAGCGGTG  
GAATGCGTAGATATCGGGAGGAACACCAGTGGCGAAGGCGGCTACTGGGCACCACTGACGCTGAGGCTCGAAAGCATG  
GGTAG

>ASV:1994:Family:Ruminococcaceae

TACGTAGGTGCAAGCGTTGTCCGGAATTACTGGGTGTAAGGGGAGCGTAGGCGGGAAGATAAGTTGGACGTCTAATCTA  
TCGGCTCAACCCATAGCCTGCTTTCAAACCTGCTTTCTGAGTAGAGTAAGCGGGAATTCCTAGTGTAGCGGTGA  
AATGCGTAAATATTAGGAGGAACACCAGTGGCGAAGGCGGCTTACTGGGCTTAACTGACGCTGAGGCTCGAAAGCGTGG  
GTAGC

>ASV:1995:Genus:Lachnoclostridium

TACGTAGGGGGCAAGCGTTATCCGGATTTACTGGGTATAAAGGGGAGCGCAGACGGCACTGCAAGTCTGAAGTAAAAGCCC  
GGGGCTCAACCCCGGGACTGCTTTGAAACTGTAGAGCTAGAGTGTGGAGAGGCAAGCGGAGTTCCTAGTGTAGCGGTG  
AAATGCGTAGATATTAGGAAGAACACCAGTGGCGAAGGCGGCTTCTGGACAGTAACGACGTTGAGGCTCGAAAGCGTG  
GGGAG

>ASV:1996:Genus:Akkermansia

TACAGAGGTCTCAAGCGTTGTCCGGAATCACTGGGCGTAAAGCGTGCCTAGGCTGTTTCGTAAGTCTGTGTGAAAGGCG  
CGGGCTCAACCCCGGGACGGCACATGATACTGCGAGACTAGAGTAATGGAGGGGAACCGGAATTCCTAGTGTAGCAGCG  
AAATGCGTAGATATCGAGAGGAACACTCGTGGCGAAGGCGGTTCTGGACATTAACGACGCTGAGGCACGAAGGCCAG  
GGGAG

>ASV:1997:Genus:Lachnospira

TACGTATGGAGCAAGCGTTATCCGGATTTACTGGGTGTAAGGGAGTGTAGGTGGCCATGCAAGTCAAGTAAAAATCT  
GGGGCTCAACCCCGAACTGCTTTGAAACTGTGAGGCTGGAGTGCAGGAGGGGTGAGTGAATTCCTAGTGTAGCGGTG  
AAATGCGTAGATATTAGGAGGAACACCAGTGGCGAAGGCGGCTCACTGGACTGTAACGACACTGAGGCTCGAAAGCGTG  
GGGAG

>ASV:1998:Genus:Bacteroides

TACGGAGGATCCGAGCGTTATCCGGATTTATTGGGTTAAAGGGGAGCGTAGGCGGGGTTAAGTCAAGTGTGAAAGTTT  
GCGGCTCAACCCGTAATGCAAGTGTACTGGTATCCTTGGAGTGCAGCATAGGTGGCGGAATTCGTGGTGTAGCGGTG  
AAATGCTTAGATATCACAGAAGACTCCGATTGCGAAGGCGAGTCACTGGAGTGAACGACGCTGATGCTCGAAAGTGTG  
GGTAT

>ASV:1999:Genus:Porphyromonas

TACGGAGGATACGAGCGTTATCCGGAATTTATTGGGTTAAAGGGTGCCTAGGTGGCTATTTAAGTCAAGGGGTAAAAGCA  
TGAGCTTAACCTCATGCTTGCCTTTGAAACTGGACAGCTAGAGAAAAGACGAGGTATGTGGAATGTGTGGTGTAGCGGTG  
AAATGCATAGATATCACAGAAGACTCCGATTGCGCAGGCGAGTACCAGACTTCTTCTGACACTGAAGCACGAAAGCGTG  
GGGAT

>ASV:2000:Genus:Blautia

TACGTAGGGGGCAAGCGTTATCCGGATTTACTGGGTGTAAGGGGAGCGTAGACGGATGGACAAGTCTGATGTGAAAGGCT  
GGGGCTCAACCCCGGGACTGCATTGAAACTGCCATCTTGGAGTCCGAGAGGTAAGCGGAATTCCTAGTGTAGCGGTG  
AAATGCGTAGATATTAGGAGGAACACCAGTGGCGAAGGCGGCTTACTGGACGTTAAGTCAAGTGTGAGGCTCGAAAGCGTG  
GGGAG

>ASV:2001:Genus:Blautia

TACGTAGGGGGCAAGCGTTATCCGGATTTACTGGGTGTAAGGGGAGCGTAGACGGCGCAGCAAGTCTGATGTGAAAGGCA  
GGGGCTTAACCTTGGACTGCATTGAAACTGTTGAGCTTGGAGTCCGAGGGGTAAAGCGGAATTCCTAGTGTAGCGGTG  
AAATGCGTAGATATTAGGAGGAACACCAGTGGCGAAGGCGGCTTACTGGACGTTAAGTCAAGTGTGAGGCTCGAAAGCGTG  
GGGAG

>ASV:2002:Genus:UBA1819

AACGTAGGGTGCAAGCGTTGTCCGGAATTACTGGGTGTAAGGGGAGCGAAGGCGGATTGACAAGTTGGGAGTGAATCTA  
TGGGCTCAACCCATAAATTGCTTTCAAACCTGTCAGTCTTGGAGTGGGTAGAGGTAGCGGGAATTCCTAGTGTAGCGGTG  
GAATGCGTAGATATCGGGAGGAACACCAGTGGCGAAGGCGGCTACTGGGCACCACTGACGCTGAGGCTCGAAAGCATG  
GGTAG

>ASV:2003:Genus:Porphyromonas

TACGGGGGATACGAGCGTTATCCGGAATTTATTGGGTTAAAGGGTGCCTAGGTGGCTATTTAAGTCAAGGGGTAAAAGCA  
TGAGCTCAACTCATGCTTGCCTTTGAAACTGGACAGCTAGAGAAAGACGAGGTATGTGGAATGTGTGGTGTAGCGGTG  
AAATGCATAGATATCACAGAAGACTCCGATTGCGCAGGCGAGTACCAGACTTATTCTGACACTGAAGCACGAAAGCGTG  
GGTAT

>ASV:2004:Genus:Ruminococcus\_1

TACGTAGGGGAGCGCGTTGTCCGGAATTACTGGGTGTAAGGGGAGCGTAGGCGGGATCGCAAGTCAAGTGTGAAAACCTA  
TGGGCTTAACCCATAAAGTGCATTTGAAACTGTGTTCTTGGAGTGAAGTAGAGGTAAAGCGGGAATTCCTAGTGTAGCGGTG  
AAATGCGTAGATATTAGGAGGAACACCAGTGGCGAAGGCGGCTTCTGGACGTTAAGTCAAGTGTGAGGCTCGAAAGCGTG  
GGGAG

>ASV:2005:Genus:Ruminococcaceae\_UCG-005

TACGTAGGTTGCAAGCGTTGTCCGGAATTTACTGGGTGTAAGGGGCGTGTAGGCGGAGATGCAAGTTGGGAGTGAATCCA  
TGGGCTCAACCCATGAACTGCTTTCAAACCTGTATCCCTTGGAGTATCGGAGAGGCAAGCGGGAATTCCTAGTGTAGCGGTG  
AAATGCGTAGATATTAGGAGGAACACCAGTGGCGAAGGCGGCTTCTGGACGACAACGACGCTGAGGCGGCAAGCGGTG  
GGGAG

>ASV:2006:Genus:Lachnoclostridium

TACGTAGGGGGCAAGCGTTATCCGGATTTACTGGGTGTAAGGGGAGCGCAGACGGCGATGCAAGTCTGGAGTAAAAGCCC

GGGGCTCAACCTGGGACTGCTTTGGAACTGTATGGCTAGAGTGTGGAGAGGCAAGCGGAATTCCTAGTGTAGCGGTG  
AAATGCGTAGATATTAGGAAGAACCACAGTGGCGAAGGCGGCTTCTGGACAGTAACGACGTTACGGCTCGAAAGCGTG  
GGGAG

>ASV:2007:Genus:Turicibacter

TACGTAGGTGGCGAGCGTTATCCGGAATTATTGGGCGTAAAGAGCGCGCAGGTGGTTGATTAAGTCTGATGTGAAAGCCC  
ACGGCTTAACCGTGGAGGGTCAATTGAAACTGGTCAACTTGAAGTGCAGAAGAGGGAAGTGAATTCATGTGTAGCGGTG  
AAATGCGTAGAGATATGGAGGAACACCAGTGGCGAAGGCGGCTTCTGGTCTGTAACGACTGATGCGCGAAAGCGTG  
GGGAG

>ASV:2008:Genus:Oscillibacter

TACGTAGGTGGCAAGCGTTGTCCGGATTTACTGGGTGTAAGGGCGGTAGCCGGGAAGGCAAGTCAGATGTGAAATCTG  
GAGGCTCAACCTCCAACTGCATTTGAAACTGCTTTCTTGAAGTATCGGAGAGGTAATCGGAATTCCTGTGTAGCGGTG  
AAATGCGTAGATATAAGGAGGAACACCAGTGGCGAAGGCGGATTACTGGACGACAACGACGGTGAGGCGCGAAAGCGTG  
GGGAG

>ASV:2009:Genus:Bacteroides

TACGGAGGATCCGAGCGTTATCCGGATTTATTGGGTTTAAAGGGAGCGTAGGCGGGTTGTTAAGTCAAGTGTGAAAGTTT  
GCGGCTCAACCGTAAAATTGCAGTTGATACTGGCAGTCTTGAAGTGCAGTAGAGGTGGGCGGAATTCGTGGTGTAGCGGTG  
AAATGCTTAGATATCACGAAGAACCAGTGGCGAAGGCGAGCTGCTGGACTGTAACGACGCTGATGCTCGAAAGTGTG  
GGTAT

>ASV:2010:Species:rhamnosus

TACGTAGGTGGCAAGCGTTATCCGGATTTATTGGGCGTAAAGCGAGCGCAGGCGGTTTTTAAAGTCTGATGTGAAAGCCC  
TCGGCTTAACCGAGGAAGTGCATCGGAAACTGGGAACTTGAAGTACAGAAGAGGACAGTGGAACTCCATGTGTAGCGGTG  
AAATGCGTAGATATATGAAGAACCACAGTGGCGAAGGCGGCTGCTGGTCTGTAACGACGCTGAGGCTCGAAAGCATG  
GGTAG

>ASV:2011:Genus:Parabacteroides

TACGGAGGATCCGAGCGTTATCCGGATTTATTGGGTTTAAAGGGTGCCTAGGCGGCCTTTAAGTCAAGCGGTGAAAGTCT  
GTGGCTCAACCATAGAAATTGCCGTTGAAACTGGAGGGCTTGAAGTATGTTTGGGCGAGGCGGAATGCGTGGTGTAGCGGTG  
AAATGCTTAGATATCACGAAGAACCAGTGGCGAAGGCGAGCTCACTGGACTGCAACGACTGATGCTCGAAAGTGTG  
GGTAT

>ASV:2012:Genus:Agathobacter

TACGTATGGTGCAGCGTTATCCGGATTTACTGGGTGTAAGGGAGCGCAGGCGGTGCGGCAAGTCTGATGTGAAAGCCC  
GGGGCTCAACCTGGTACTGCATTGAAACTGTCGTAAGTGTGCGGAGGGTAAGCGGAATTCCTAGTGTAGCGGTG  
AAATGCGTAGATATTAGGAGGAACACCAGTGGCGAAGGCGGCTTACTGGACGATAACGACGCTGAGGCTCGAAAGCGTG  
GGGAG

>ASV:2013:Genus:Ruminococcaceae\_UCG-014

TACGTAGGGAGCAAGCGTTATCCGGATTTATTGGGTGTAAGGGTGCCTAGACGGGAAAGCAAGTATGTTGTGAAATCCC  
TCGGCTTAACCTGAGGAACTGCAACTAAAAGTGTCTTCTTGAAGTGTGGAGAGGAAAGTGAATTCCTAGTGTAGCGGTG  
AAATGCGTAGATATTAGGAGGAACACCAGTGGCGAAGGCGGCTCAACTGGACGATAACGACGCTGAGGCGCGAAAGCGTG  
GGGAG

>ASV:2014:Family:Lachnospiraceae

TACGTATGGTGCAGCGTTATCCGGATTTACTGGGTGTAAGGTAGCGTAGACGGATGGGCAAGTCTGATGTGAAAACCC  
GGGGCTCAACCCGGGACTGCATTGAAACTGTTTATCTAGAGTGTGAGAGGTAAGTGAATTCCTAGTGTAGCGGTG  
AAATGCGTAGATATTAGGAGGAACACCAGTGGCGAAGGCGGCTTACTGGACGATAACGACGTTGAGGCTCGAAAGCGTG  
GGGAG

>ASV:2015:Genus:Lachnoclostridium

TACGTAGGGGGCAAGCGTTATCCGGATTTACTGGGTGTAAGGGAGCGTAGACGGCGAAGCAAGTCTGAAGTAAAACCC  
AGGGCTCAACCTGGGACTGCTTTGAAACTGTTTGTCTAGAGTGTGAGAGGTAAGCGGAATTCCTAGTGTAGCGGTG  
AAATGCGTAGATATTAGGAGGAACACCAGCGGCGAAGGCGGCTTACTGGACGATAACGACGTTGAGGCTCGAAAGCGTG  
GGGAG

>ASV:2016:Genus:Intestinibacter

TACGTAGGGGGCTAGCGTTATCCGGATTTACTGGGCGTAAAGGGTGCCTAGGCGGTCTTTAAGTCCGGAGTGAAGGCT  
ACGGCTCAACCGTAGTAAGCTCTTGAAGTGGAGGACTTGAAGTGCAGGAGAGGAGAGTGAATTCCTAGTGTAGCGGTG  
AAATGCGTAGATATTAGGAGGAACACCAGTGGCGAAGGCGGCTTCTGGACTGTAACGACTGACGCTGAGGCGCGAAAGCGTG  
GGAGC

>ASV:2017:Genus:Blautia

TACGTAGGGGGCAAGCGTTATCCGGATTTACTGGGTGTAAGGGAGCGTAGACGGTGTGGCAAGTCTGATGTGAAAGGCA  
TGGGCTCAACCGTGGACTGCATTGAAACTGTCATACTTGAAGTGCAGGAGGGTAAGCGGAATTCCTAGTGTAGCGGTG  
AAATGCGTAGATATTAGGAGGAACACCAGTGGCGAAGGCGGCTTACTGGACTGACAATGACGCTGAGGCTCGAAAGCGTG  
GGGAG

>ASV:2018:Family:Ruminococcaceae

TACGTAGGGAGCAAGCGTTGTCCGGAATTACTGGGTGTAAGGGAGCGTAGGCGGGACCAGTGGATGTGAAATCTA  
CCGGCTCAACTGGTAGTGCATTTAAAAGTGCATTTTGAAGTGAAGTGAAGTAGAGGAGGCGGAATTCCTAGTGTAGCGGTG  
AAATGCGTAGATATTAGGAGGAACACCAGTGGCGAAGGCGGCTTACTGGACTGACAATGACGCTGAGGCTCGAAAGTGTG  
GGAGC

>ASV:2019:Genus:Ruminiclostridium\_5

TACGTAGGGAGCAAGCGTTGTCCGATTTACTGGGTGTAAGGGTGCCTAGGCGGATTGGCAAGTCAAGTGAATCCA  
TGGGCTTAACCCATGAAGTCTTTGAAACTGTTAGTCTTGAAGTGAAGTAGAGGAGGCGGAATTCGTGGTGTAGCGGTG  
AAATGCGTAGATATTAGGAGGAACATCAGTGGCGAAGGCGGCTTACTGGACTGAAACTGACTGAGGCGCGAAAGCGTG  
GGGAG

>ASV:2020:Family:Lachnospiraceae  
TACGTAGGGGGCAAGCGTTATCCGGATTTACTGGGTGTAAGGGAGCGTAGACGGCATGGCAAGCCAGATGTGAAAGCCC  
GGGGCTCAACTCCGGGACTGCATTTGAACTGTCAGGCTAGAGTGTGGAGAGGAAAGCGGAATTCCTAGTGTAGCGGTG  
AAATGCGTAGATATTAGGAGGAACACCAGTGGCGAAGGCGGCTTTCTGGACGATGACTGACGTTGAGGCTCGAAAGCGTG  
GGGAG

>ASV:2021:Genus:Sphingomonas  
TACGGAGGGAGCTAGCGTTGTTCGGAATTACTGGGCGTAAAGCGCACGTAGGCTGCTTTGTAAGTCAGGGGTGAAAGCCT  
GGAGCTCAACTCCAGAAGTGCCTTTGAGACTGCATCGCTTGGATCCGGGAGAGGTGAGTGAATTCAGTGTAGCGGTG  
AAATTCGTAGATATTGGAAGAACACCAGTGGCGAAGGCGGCTCACTGGACCGGTATTGACGCTGAGGTGCGAAAGCGTG  
GGGAG

>ASV:2022:Genus:Ruminococcaceae\_UCG-002  
TACGTAGGTGGCAAGCGTTGTCCGGAATTACTGGGTGTAAGGGCGTGCAGCAGGCTGCAAGTCAGATGTGAAATCCA  
TGGGCTCAACCCATGAATTTGAACTGTAGATCTTGGAGTGTGGAGGGGCAATCGGAATTCCTAGTGTAGCGGTG  
AAATGCGTAGATATTAGGAGGAACACCAGTGGCGAAGGCGGATTGCTGGACGATAACTGACGCTGAGGCGCGAAAGTGTG  
GGGAG

>ASV:2023:Species:vaginalis  
TACGTATGGACCGAGCGTTGTCCGGAATCATTGGGCGTAAAGGGTACGTAGGCGGCTAGTAAGTTAGAAGTAAATAAT  
ATAGCTCAACTATATAAAGCTTTTAAACTGTTAGGCTTGGAGATGAAAGGGAAAGTGAATTCCTAGTGTAGCGGTG  
AATGCGCAGATATTAGGAAGAATACCGGTGGCGAAGGCGACTTTCTGGTCTCATCTGACGCTGAGGTACGAAAGCGTGG  
GTAGC

>ASV:2024:Family:Ruminococcaceae  
TACGTAGGTGGCGAGCGTTGTCCGGAATTACTGGGTGTAAGGGTGCCTAGGCGGGACGGTAAGTCAGCTGTGAAAGGTA  
CAGGCTCAACCTGTGCATGTGCACTGCAGTTGAACTGCTGTTCTTGGAGTAGAGGAGAGGTAACCGGAATTCAGTGTAGCGGTG  
GAATGCGTAGATATTGGGAGGAACACCAGTGGCGAAGGCGGTTACTGGACTCTAAGTACGCTGAAGCACGAAAGCGTG  
GGGAG

>ASV:2025:Genus:Erysipelatoclostridium  
AACGTAGGTGGCGAGCGTTATCCGGAATTTGGGCGTAAAGAGGGAGCAGGCGGCTGTAAGGTCCACTGGTAAAAGAC  
CGGGCTAAACCCCGGTAGGCGAGGAAACCGTACGCTAGAGTACAGCAGAGGATCGTGAATTCATGTGTAGCGGTG  
AAATGCGTAGATATATGGAGGAACACCAGTGGCGAAGGCGACGATCTGGGCTGAAACAGACGCTGAGTCCGAAAGCGTG  
GGGAG

>ASV:2026:Genus:Escherichia/Shigella  
TACGGAGGGTGCAGCGTTAATCGGAATTACTGGGCGTAAAGCGCACGAGGCGGTTTGTAAAGTCAGATGTGAAATCCC  
CGGGCTCAACCTGGGAACTGCATCTGATACTGGCAAGCTTGGAGTCTGCTAGAGGGGGGTAGAATTCAGCTGTAGCGGTG  
AAATGCGTAGAGATCTGGAGGAATACCGGTGGCGAAGGCGGCCCTGGACGAAGACTGACGCTCAGGTGCGAAAGCGTG  
GGGAG

>ASV:2027:Genus:Galbitalea  
TACGTAGGGTGCAGCGTTATCCGGAATTATTGGGCGTAAAGAGCTCGTAGGCGGTTTGTCCGCTCTGCTGTGAAAAGT  
GAGGCTCAACCTCCAGCCTGCAGTGGGTACGGGCAGACTAGAGTGGGTAAGGGAGATTGGAATTCCTGGTGTAGCGGTG  
GAATGCGCAGATATCAGGAGGAACACCAGTGGCGAAGGCGAGATCTCTGGGCCGTAAGTACGCTGAGGAGCGAAAGCGTG  
GGGAG

>ASV:2028:Genus:Acetanaerobacterium  
TACGTAGGTGGCAAGCGTTGTCCGGAATTACTGGGTGTAAGGGAGCGTAGGCGGCTTGTCAAGTTGAATGTTAAACTA  
TCGGCTTAACTGGTAGTTCGCTTCAAAGTGCAGGACTTGGTGAAGTAGAGGCAGGCGGAATTCCTGGTGTAGCGGTGA  
AATGCGTAGATATCGGAGGAACACCAGTGGCGAAGGCGGCTGCTGGGCTTTACTGACGCTGAGGCTCGAAAGTGTGG  
GGAGC

>ASV:2029:Order:Bacteroidales  
TACGGAGGATCCGAGCGTTATCCGGATTTATTGGGTTTAAAGGGAGCGTAGGCGGAAGCTTAAAGTCAGTTGTGAAAAGTTT  
GCGGCTCAACCGTAAATTTGCAGTTGATACTGGGTTTCTTGGAGTGCAGTAGAGGTAGGCGGAATTCCTAGTGTAGCGGTG  
AAATGCGTAGATATTAGGAGGAACACCAGTGGCGAAGGCGGATTGCTGGACGATAACTGACGCTGAGGCGCGAAAGCGTG  
GGGAG

>ASV:2030:Genus:Haemophilus  
TACGGAGGGTGCAGCGTTAATCGGAATAACTGGGTGTAAGGGCACGAGGCGGTGACTTAAAGTGAAGTGTGAAAGCCC  
CGGGCTTAACTGGGAATTGCATTTCACTAGGTCGCTAGAGTACTTTAGGAGGGGTAGAATTCACGCTGTAGCGGTG  
AAATGCGTAGAGATGTGGAGGAATACCGAAGGCGAAGGCGGCTTGGGAATGTACTGACGCTCATGTGCGAAAGCGTG  
GGGAG

>ASV:2031:Family:Ruminococcaceae  
TACGTAGGGAGCGAGCGTTGTCCGGAATTACTGGGTGTAAGGGTGCCTAGGCGGACTGGCAAGTCAGTGGTAAAAGT  
TGGGCTTAAACCATAGACTGCCATTGAACTGTTGGTCTTGGAGTGAAGTAGAGGTAGGCGGAATTCCTGGTGTAGCGGTG  
AAATGCGTAGAGATCGGAGGAACACCAGTGGCGAAGGCGGCTACTGGGCTTAACTGACGCTGAGGCGCGAAAGTGTG  
GGTAG

>ASV:2032:Genus:Parabacteroides  
TACGGAGGATCCGAGCGTTATCCGGATTTATTGGGTTTAAAGGGTGCCTAGGTTGGTATTAAAGTCAGCGGTGAAAGTTT  
GTGGCTCAACCATAAAATTGCCGTTGAACTGGGTTACTTGGTGTGTTTGGAGTAGGCGGAATGCGTGGTGTAGCGGTG  
AAATGCTTAGATATACGAAGAAGTCCGATTGCGAAGGCGAGCTTGGTGGACTGTAAGTACGCTGATGCTCGAAAGTGTG  
GGTAT

>ASV:2033:Genus:Flavonifractor  
TACGTAGGTGGCAAGCGTTATCCGGAATTACTGGGTGTAAGGGCGTGTAGGCGGACTACAAGTCAGATGTGAAAACCA  
GAGGCTCAACCTCTGGCCTGCATTTGAACTGCAGTCTTGGAGTGTGGAGAGGCAATCGGAATTCCTGTGTAGCGGTG

AAATGCGTAGATATACGGAGAACACCCAGTGGCGAAGGCGGATTGCTGGACAGTAACTGACGCTGAGGCGCGAAAGCGTG  
GGGAG  
>ASV:2034:Genus:Anaerostipes  
TACGTAGGGGGCAAGCGTTATCCGGATTACTGGGTGTAAGGGTGCCTAGGTGGTATGGCAAGTCAAAGTAAAACCC  
AGGGCTTAACCTGGGACTGCTTTGAAACTGTCAGACTAGAGTGCAGGAGAGGTAAGCGGAATTCCTAGTGTAGCGGTG  
AAATGCGTAGATATTAGGAGGAACATCAGTGGCGAAGGCGGCTTACTGGACTGAAACTGACACTGAGGCACGAAAGCGTG  
GGGAG  
>ASV:2035:Genus:Lachnospiraceae\_NK4A136\_group  
TACGTAGGGGGCAAGCGTTATCCGGATTACTGGGTGTAAGGGAGCGTAGACGGTTTTGCGAGTCTGAAGTAAAAGCC  
GGGGCTTAACCCGGGACTGCTTTGAAACTGTAGGACTAGAGTGCAGGAGAGGTAAGTGAATTCCTAGTGTAGCGGTG  
AAATGCGTAGATATTAGGAGGAACACCCAGTGGCGAAGGCGGCTTACTGGACTGTAACGACTGAGGCTCGAAAGCGTG  
GGGAG  
>ASV:2036:Genus:Butyricimonas  
TACGGGGATGCGAGCGTTATCCGGATTATTGGGTTAAAGGGCGCGTAGGCGGGACGGCAAGTCAAGCGTAAAAGACT  
GCAGCTAAACTGTAGCACGCCGTTGAAACTGTTGGCCTCGAGACGAGACGAGGGAGGCGGAACAAGTGAAGTAGCGGTGA  
AATGCATAGATATCACTTGGAAACCCGATAGCGAAGGCAGCTTCCCAGGCTCGTTCTGACGCTGATGCGCGAGAGCGTG  
GTAGC  
>ASV:2037:Genus:Dialister  
TACGTAGGTGGCAAGCGCTGTCCGGAATTATTGGGCTAAAGCGCGCAGGCGGCTTCTTAAGTCCATCTTAAAAGTGC  
GGGGCTTAACCCGATGGGATGAAACTGGGAGGCTGGAGTATCGGAGAGGAAAGTGAATTCCTAGTGTAGCGGTGA  
AATGCGTAGAGATTAGGAAGAACACCGGTGGCGAAGGCGACTTCTGGACGCAACTGACGCTGAGGCGCGAAAGCGTG  
GGAGC  
>ASV:2038:Genus:Ruminococcaceae\_UCG-014  
TACGTAGGGAGCAAGCGTTATCCGGATTATTGGGTGTAAGGGTGCCTAGACGGTAATGCAAGTTAGTTGTGAAATCCC  
TCGGCTTAACCTGAGGAACTGCAACTAAAACACTATTTCTTGGTATTGGAGGGGAAAGTGAATTCCTAGTGTAGCGGTG  
AAATGCGTAGATATTAGGAGGAACACCGGTGGCGAAGGCGACTTCTGGACAATCACTGACGCTGAGGCGCGAAAGGTG  
GGGAG  
>ASV:2039:Family:Lachnospiraceae  
TACGTAGGGGGCAAGCGTTATCCGGATTACTGGGTGTAAGGGAGCGTAGACGGCAAGGCAAGTCTGAAGTAAAAGCC  
GGGGCTTAACCGCGGACTGCTTTGAAACTGTCTGGCTGGAGTGCAGGAGGTAAGCGGAATTCCTAGTGTAGCGGTG  
AAATGCGTAGATATTAGGAGGAACACCCAGTGGCGAAGGCGGCTTACTGGACGTAACGACTGAGGCTCGAAAGCGTG  
GGGAG  
>ASV:2040:Species:coli  
TACGGAGGTGCAAGTGTAAATCGGAATTACTGGGCTAAAGCGCACGAGGCGGTTTGTAAAGTCAAGTGTGAAATCCC  
CGGGCTCAACCTGGGAACTGCATCTGATACTGGCAAGCTTGGTCTCGTAGAGGGGGTAGAATTCAGGTGTAGCGGTG  
AAATGCGTAGAGATCTGGAGGAATACCGGTGGCGAAGGCGGCCCCCTGGACGAAGACTGACGCTCAGGTGCGAAAGCGTG  
GGGAG  
>ASV:2041:Genus:Acidaminococcus  
TACGTAGGTGGCAAGCGTTGTCCGGAATTATTGGGCTAAAGAGCATGTAGGCGGGCTTTTAAATCCGACGTGAAAATGC  
GGGGCTTAACCCGATGGCGTTGGATACTGGGAGTCTTGGTGCAGGAGAGGAAAGGGGAATTCAGGTGTAGCGGTGA  
AATGCGTAGATATTGGGAGGAACACCCAGTGGCGAAGGCGCCTTCTGGACTGTGTCTGACGCTGAGATGCGAAAGCCAG  
GTAGC  
>ASV:2042:Family:Defluviitaleaceae  
TACGTAGGGGGCAAGCGTTATCCGGAATTACTGGGTGTAAGGGTGCCTAGGCGGCACGGCAAGTTTGTATGTGAAACCA  
TAGGGCTTAACCTGTGGCATGCATCAAAAACCTACCGAGCTAGAGTGCAGGAGAGGAAAGCGGAATTCCTAGTGTAGCGGTG  
AAATGCGTAGATATTAGGAAGAACACCCAGTGGCGAAGGCGGCTTCTGGACTGCAACTGACGCTGAAAGCACGAAAGCGTG  
GGGAG  
>ASV:2043:Genus:Peptococcus  
TACGTAGGGGGCAAGCGTTGTCCGGAATCACTGGGCTAAAGGGCGCTAGGCGGCAATATAAGTCAAGTGTGAAAGGTG  
AGGGCTCAACCTTAGACTGCATCTGATACTGTATAGCTTGGTGTGAGAGAGGAAAGTGAATTCCTAGTGTAGCGGTG  
AAATGCGTAGATATTAGGAGGAACACCCAGTGGCGAAGGCGACTTCTGGCTCATAACTGACGCTGAGGCGCGAAAGCGTG  
GGGAG  
>ASV:2044:Genus:Bacteroides  
TACGGAGGATTCGAGCGTTATCCGGATTATTGGGTTAAAGGGAGCGTAGGCGGACGCTTAAAGTCAAGTGTGAAAGTTT  
GCGGCTCAACCGTAAAATTGCAAGTGTACTGGGTGTCTTGGTACAGTAGAGGCGAGGCGGAATTCGTGGTGTAGCGGTG  
AAATGCTTAGATATCACGAAGAACTCCGATTGCGAAGGCAGCTTCTGGACTGTAACGACGCTGATGCTCGAAAGTGTG  
GGTAT  
>ASV:2045:Family:Lachnospiraceae  
TACGTAGGGGGCAAGCGTTATCCGGATTACTGGGTGTAAGGGAGCGTAGACGGCGAGACAAGTCTGAAGTAAAAGCC  
GGGGCTCAACCCGGGACTGCTTTGAAACTGCCTTGTAGAGTGTGAGAGAGGTAAGTGAATTCCTAGTGTAGCGGTG  
GAAATGCGTAGATATTAGGAGGAACACCCAGTGGCGAAGGCGGCTTACTGGACGATAACTGACGTTGAGGCTCGAAAGCGT  
GGGGA  
>ASV:2046:Genus:Ruminococcaceae\_UCG-013  
TACGTAGGTGACAAGCGTTGTCCGGAATTACTGGGTGTAAGGGCGCGTAGGCGGACTGTCAAGTTAGTCTGAAATACC  
GGGGCTTAACCCGGGGCTGCGATTGAAACTGACAGCCTTGGTATCGGAGAGGAAAGCGGAATTCCTAGTGTAGCGGTG  
AAATGCGTAGATATTAGGAGGAACACCCAGTGGCGAAGGCGGCTTCTGGACGCAACTGACGCTGAGGCGCGAAAGGTG  
GGGAG  
>ASV:2047:Genus:Prevotella\_2

TACGGAAGGTCCGGGCGTTATCCGGATTTATTGGGTTAAAGGGAGCGTAGGCCGTCTGGTAAGCGTGTGTGAAATGTC  
GGGGCTCAACCTGGGCATTGACGCGCAACTGTCAGACTTGTAGTGCCGGGAAGTAGCGGAATTCGTCTGTAGCGGTG  
AAATGCTTAGATATGACGAAGAAGCTCCGATTGCCAAGGCAGCCTGCTGTAGCACAACTGACGCTGAAGCTCGAAAGCGTG  
GGTAT

>ASV:2048:Genus:Blautia

TACGTAGGGGGCAAGCGTTATCCGGATTTACTGGGTGTAAAGGGAGCGTAGACGGCGCAGCAAGTCTGATGTGAAAGGCA  
GGGGCTTAACCCCTGGACTGCATTGAAAAGTCTGTGCTTGTAGTGCCGGAGGGGTAAGCGGAATTCCTAGTGTAGCGGTG  
AAATGCGTAGATATTAGGAGGAACACCAAGTGGCGAAGGCGGCTTACCAGGACGGAAGTACGCTTGAAGCTCGAAAGCGTG  
GGGAG

>ASV:2049:Genus:Odoribacter

TACGGAGGATGCGAGCGTTATCCGGATTTATTGGGTTAAAGGGTGCCTAGGCGGTTTATTAAGTTAGTGGTTAAACGGT  
TGAGCTAAACTCAATTTTCCATTAACTGGTAACTCGAGTACAGACGAGGTAGGCGGAATAAGTTAAGTAGCGGTGA  
AATGCATAGATATAACTTAGAACTCCGATAGCGAAGGCAGCTTACCAGACTGTAAGTACGCTGATGCACGAGAGCGGTG  
GTAGC

>ASV:2050:Genus:Candidatus\_Soleaferrea

TACGTAGGTGGCAAGCGTTGTCCGGAATTACTGGGTGTAAAGGGAGCGTAGGCGGGGATGCAAGTTGAATGTTAATCTA  
TCGGCTCAACTGATAGTCGCGTTCAAAGTCAACTCTTGTAGTGAAGTAGAGGTAGGCGGAATTCCTAGTGTAGCGGTGA  
AATGCGTAGATATTAGGAGGAACACCAAGTGGCGAAGGCGGCTTACTGGGCTTTTACTGACGCTGATGCTCGAAAGCATG  
GGAGC

>ASV:2051:Genus:Ruminococcaceae\_UCG-014

TACGTAGGGAGCGAGCGTTATCCGGATTTATTGGGTGTAAAGGGTGCCTAGACGGGAAGGTAAGTTAGTTGTGAAATCCC  
TCGGCTTAACCTGAGGAAGTCAACTAAAAGTGTCTTTCTTGTAGTACTGGAGAGGAAAGTGAATTCCTAGTGTAGCGGTG  
AAATGCGTAGATATTAGGAGGAACACCAAGTGGCGAAGGCGACTTTCTGGACAGAACTGACGTTGAGGCACGAAAGTGTG  
GGGAG

>ASV:2052:Genus:Anoxybacillus

TACGTAGGTGGCAAGCGTTGTACGGAATTATTGGGCGTAAAGCGCGCAGGCGGCTCTTAAGTCTGATGTGAAAGCCC  
ACGGCTCAACCGTGGAGGTCATTGAAAAGTGGGGGACTTGTAGTGCAGAAGAGGAGAGCGGAATTCACGCTGTAGCGGTG  
AAATGCGTAGATATTGAGGGAACACCAAGTGGCGAAGGCGGCTCTCTGGTCTGTAAGTACGCTGAGGCGCGAAAGCGTG  
GGGAG

>ASV:2053:Genus:Subdoligranulum

AACGTAGGGTGAAGCGTTGTCCGGAATTACTGGGTGTAAAGGGGGCGCAGGCGGACCGGCAAGTTGGAAGTGAAAACCTA  
TGGGCTCAACCCATAAATTGCTTTCAAAGTGTGCTGCTTGTAGTGTGACAGAGGTAGGTGGAATTCCTGGTGTAGCGGTG  
GAATGCGTAGATATTGAGGGAACACCAAGTGGCGAAGGCGACTTACTGGGCCAACCTGACGCTGAGGCTCGAAAGCATG  
GGTAG

>ASV:2054:Genus:CAG-56

TACGTAGGGGGCAAGCGTTATCCGGATTTACTGGGTGTAAAGGGAGCGTAGACGGCGAGGCAAGTCTGATGTGAAAACCC  
GGGGCTCAACCCCGTGTGAGTGCATTGGAAACTGTTTGTCTTGTAGTGTGAGGAGGTAAGCGGAATTCCTAGTGTAGCGGTG  
AAATGCGTAGATATTAGGAGGAACACCAAGTGGCGAAGGCGGCTTACTGGACGGTAAGTACGCTTGAAGCTCGAAAGCGTG  
GGGAG

>ASV:2055:Species:helvolus/terrae

TACGTAGGGTGAAGCGTTGTCCGGAATTATTGGGCGTAAAGAGCTCGTAGGCGGTTTGTGCGCTGTGCTGTGAAATCCC  
GAGGCTCAACCTCGGGTCTGAGTGGGTACGGGCAGACTAGAGTGTGTTAGGAGGATGGAATTCCTGGTGTAGCGGTG  
GAATGCGTAGATATTAGGAGGAACACCAAGTGGCGAAGGCGACTTCTGGGCCATTACTGACGCTGAGGAGCGAAAGCATG  
GGGAG

>ASV:2056:Species:aestuariatvivens/agarivorans/antarctica/arabiensis/arctica/atlantica/  
carrageenovora/chazhmella/citrea/distincta/donghaensis/elyakovii/espejiana/flavipulchra/  
ganghwensis/gelatinilytica/gracilis/haloplanktis/hodoensis/issachenkonii/lipolytica/  
luteoviolacea/marina/mariniglutinosa/nigrifaciens/paragorgicola/porphyrae/profundi/prydzensis/  
shioyasakiensis/spongiae/telluritireducens/tetraodonis/translucida/undina/whanghaensis/  
xishaensis

TACGGAGGGTGGCAGCGTTAATCGGAATTACTGGGCGTAAAGCGTACGCAGGCGGTTTGTAAAGCGAGATGTGAAAGCCC  
CGGGCTCAACCTGGGAAGTGCATTTGAACTGGCAAAGTGTGATAGAGGGTGGTAGAATTCAGGTGTAGCGGTG  
AAATGCGTAGATATTGAGGAATACCGATGGCGAAGGCGACCACTGGGTCAACACTGACGCTCATGTACGAAAGCGTG  
GGGAG

>ASV:2057:Species:harbinensis/lwoffii

TACAGAGGGTGAAGCGTTAATCGGATTTACTGGGCGTAAAGCGTGCCTAGGTGGCCAATTAAGTCAAATGTGAAATCCC  
CGAGCTTAACCTGGGAATTGCAATTCGATACTGGTGGCTAGAGTATGGGAGAGGATGGTAGAATTCAGGTGTAGCGGTG  
AAATGCGTAGATATTGAGGAATACCGATGGCGAAGGCGACCTTGGCTAATACTGACACTGAGGTACGAAAGCATG  
GGGAG

>ASV:2058:Genus:Merdibacter

TACGTAGGTGGCGAGCGTTATCCGGAATGATTGGGCGTAAAGGGTGCCTAGGTGGCACGTTAAGTCTGGAGTAAAGGGA  
GCGGCTCAACCGCTGTTGGCTCTGAAAGTGGCGAGCTAGAGTGCAGGAGAGGGCGATGGAATTCATGTGTAGCGGTAA  
AATGCGTAGATATTGAGGAACACCGGTGGCGAAGGCGGCTGCCTGGCTGCAACTGACACTGAAGCACGAAAGCGGTG  
GGAGC

>ASV:2059:Species:delbrueckii

TACGTAGGTGGCAAGCGTTGTCCGGAATTATTGGGCGTAAAGCGAGCGCAGGCGGAATGATAAGTCTGATGTGAAAGCCC  
ACGGCTCAACCGTGAAGTGCATCGGAAAGTGTCTTCTTGTAGTGCAGAAGAGGAGGTGGAATTCATGTGTAGCGGTG  
GAATGCGTAGATATTGGAAGAACACCAAGTGGCGAAGGCGGCTCTCTGGTCTGCAACTGACGCTGAGGCTCGAAAGCATG



GGTAG

>ASV:2060:Genus:Bacteroides

TACGGAGGATCCGAGCGTTATCCGGATTTATTGGGTTTAAAGGGAGCGTAGGCGGACGCTTAAGTCAGTTGTGAAAGTTT  
GCGGCTCAACCGTAAAATTGCAATTGATACTGGCGTCCTTGAGTACAGTTGAGGTGGCGGAATTCGTGGTGTAGCGGTG  
GAATGCGTAGATATCGGGAGGAACACCAGTGGCGAAGGCGGCTACTGGGCACCAACTGACGCTGAGGCTCGAAAGTGTG  
GGTAG

>ASV:2061:Genus:Faecalibacterium

AACGTAGGTCACAAGCGTTGTCCGGAATTACTGGGTGTAAGGGAGCGCAGGCGGGAAGACAAGTTGGAAGTGAATCTA  
TGGGCTCAACCCATAAAGTGTCTTCAAACCTGTTTTCTTGAGTAGTGCAGAGGTAGGCGGAATTCCTGGTGTAGCGGTG  
GAATGCGTAGATATCGGGAGGAACACCAGTGGCGAAGGCGGCTTCTGGGCTCGACTGACGCTGAGGAGCGAAAGCTGG  
GGGAG

>ASV:2062:Genus:Ruminococcaceae\_UCG-009

TACGTAGGTGGCAAGCGTTATCCGGATTTACTGGGTGTAAGGGAGCGAGTAGGCGGACTGCAAGTCAGATGTGAAAAC  
TGGGCTCAACCCATAGACTGCATTTGAAACTGTGGTTCTTGAGTGTGAGAGGCGAGGCGGAATTCCTGGTGTAGCGGTG  
GAATGCGTAGATATCGGGAGGAACACCAGTGGCGAAGGCGGCTGCTGGACATTAACGACGCTGAGGCGGAAAGCGTG  
GGGAG

>ASV:2063:Genus:Agathobacter

TACGTATGGTGAAGCGTTATCCGGATTTACTGGGTGTAAGGGAGCGCAGGCGGTGCGGCAAGTCTGATGTGAAAGCC  
GGGGCTCAACCCCGTACTGCATTGAAACTGTCGACTAGAGTGTGCGAGGGTAAGCGGAATTCCTAGTGTAGCGGTG  
AATGCGTAGATATTAGGAGGAACACCAGTGGCGAAGGCGGCTTACTGGACATAACGACGCTGAGGCTCGAAAGCGTG  
GGGAG

>ASV:2064:Family:Lachnospiraceae

TACGTAGGGGGCAAGCGTTATCCGGATTTACTGGGTGTAAGGGAGCGTAGACGGTGAAGCAAGTCTGAAGTGAAGGTT  
GGGGCTCAACCCGAAACTGCTTGGAACTGTTAACTGGAGTACAGGAGAGGTAAGTGAATTCCTAGTGTAGCGGTG  
AATGCGTAGATATTAGGAGGAACACCAGTGGCGAAGGCGGCTTACTGGACTGTAACGACGTTGAGGCTCGAAAGCGTG  
GGGAG

>ASV:2065:Genus:Bacteroides

TACGGAGGATTCGAGCGTTATCCGGATTTATTGGGTTTAAAGGGAGCGTAGGCGGAAGCTTAAGTCAGTTGTGAAAGTTT  
GCGGCTCAACCGTAAAATTGCAAGTGTACTGGGTTTCTTGAGTGCAGTAGAGGTAGGCGGAATTCGTGGTGTAGCGGTG  
AATGCTTAGATATCACAAGAACTCCGATTGCGAAGGCGGCTTACTGGACTGTAACGACGCTGATGCTCGAAAGTGTG  
GGTAT

>ASV:2066:Genus:Ruminococcaceae\_UCG-014

TACGTAGGGAGCAAGCGTTATCCGGATTTATTGGGTGTAAGGGTGCAGTAGGCGGAATTTAAGTTAGTTGTGAAAGCC  
TCGGCTTAACGGGAACTGCAACTAAAACGGATTTCTTGAGTGTGGAGAGGAAAGCGGAATTCCTAGTGTAGCGGTG  
AATGCGTAGATATTAGGAGGAACACCAGTGGCGAAGGCGGCTTCTGGACAATAACGACGTTGAGGCGGAAAGTGTG  
GGGAG

>ASV:2067:Family:Lachnospiraceae

TACGTAGGGGGCAAGCGTTATCCGGATTTACTGGGTGTAAGGGAGCGTAGACGGCATGGCAAGCCAGATGTGAAAGCC  
GGGGCTCAACCCGGGACTGCATTTGAACTGTCAGGCTAGAGTGTGCGAGAGGAAAGCGGAATTCCTAGTGTAGCGGTG  
AATGCGTAGATATTAGGAGGAACACCAGTGGCGAAGGCGGTTTTCTGGACGATGACTGACGTTGAGGCTCGAAAGCGTG  
GGGAG

>ASV:2068:Species:aestuarii/agri/jeotgali

TACGGAGGGTGCAAGCGTTAATCGGAATTTACTGGGCTAAAGCGCACGAGGCGGCTTTTTAAGTCGGATGTGAAAGCC  
CGGGCTCAACCTGGGAATTGCATCTGATACTGGGAAGCTAGAGTATGTGAGAGGGGGTAGAATTCGAAGTGTAGCGGTG  
AATGCGTAGAGATTTGGAGGAATACCAGTGGCGAAGGCGGCCCCCTGGCACATACTGACGCTCAGGTGCGAAAGCGTG  
GGGAG

>ASV:2069:Genus:Allisonella

TACGTAGGTGGCAAGCGTTGTCCGGAATTTATTGGGCTAAAGCGCGCGCAGGCGGCCGTGCAAGTCTATCTTAAAGCGT  
GGGGCTTAACCCATGAGGGATGGAACCTGCAGGGCTGGAGTGTGCGAGGGGAAAGTGAATTCCTAGTGTAGCGGTGA  
AATGCGTAGAGATTAGGAAGAACACCAGTGGCGAAGGCGACTTTCTAGACGCAACTGACGCTGAGGCGGAAAGCGTG  
GGAGC

>ASV:2070:Genus:Faecalibacterium

AACGTAGGTCACAAGCGTTGTCCGGAATTACTGGGTGTAAGGGAGCGCAGGCGGGCGATCAAGTTGGAAGTGAATCCA  
TGGGCTCAACCCATGAACTGCTTCAAACCTGGTCTGTTAGTGTGAGTAGTGCAGAGGTAGGCGGAATTCCTGGTGTAGCGGTG  
GAATGCGTAGATATCGGGAGGAACACTAGTGGCGAAGGCGGCTACTGGGCACCAACTGACGCTGAGGCTCGAAAGTGTG  
GGTAG

>ASV:2071:Genus:Proteiniphilum

TACGGAGGATCCGAGCGTTATCCGGATTTATTGGGTTTAAAGGGTGCAGGCGGCGATGTTAAGTCGGCGGTGAAATTTT  
GCAGCTCAACTGTAAAAGAGCCTTCGAAACTGGCAAGCTTTAGTGTGGATGAAGTAGGCGGAATTTGTGGTGTAGCGGTG  
AATGCGTAGATATCACAAGAACACCAGTGGCGAGGCGGCTTACTAAACCATAACTGACGCTCATGCACGAAGGCGGTG  
GGGAT

>ASV:2072:Genus:Desulfovibrio

TACGGAGGGTGCAAGCGTTAATCGGAATCACTGGGCTAAAGCGCACGAGGCTGTTATGTAAGTCAGGGGTGAAATCCC  
ACGGCTCAACCGTGGAACTGCCCTTGATACTGCACGACTTGAATCCGGGAGAGGGTGGCGGAATTCAGGTGTAGGAGTG  
AATCCGTAGATATCTGGAGGAACATCAGTGGCGAAGGCGGCCCCCTGGATCGGTATTGACGCTGAGGTGCGAAAGCGTG  
GGGAG

>ASV:2073:Species:faecis

TACGGAGGATCCGAGCGTTATCCGGATTTATTGGGTTTAAAGGGTGCAGTAGGTGTTTTTAAAGTCAGCGGTGAAAGTTT

GTGGCTCAACCATAAAATTGCCGTTGAAACTGGAAGACTTGTAGTATGTTTGGAGTAGCGGAATGCGTGGTGTAGCGGTG  
AAATGCATAGATATCACGCAGAAGCTCAATTGCGAAGGCAGCTTACTAAACCATAACTGACACTGAAGCACGAAAGCGTG  
GGGAT  
>ASV:2074:Family:Lachnospiraceae  
TACGTATGGTGAAGCGTTATCCGGATTTACTGGGTGTAAGGGAGCGTAGACGGATGGCAAGTCTGATGTGAAAACCC  
GGGGCTCAACCCCGGACTGCATTGAAACTGTTTCATCTAGAGTGTGGAGAGGTAAGTGAATTCCCTAGTGTAGCGGTG  
AAATGCGTAGATATTAGGAAGAACCACAGTGGCGAAGGCGCTTACTGGACGTAAGTACGTTGAGGCTCGAAAGCGTG  
GGGAG  
>ASV:2075:Genus:Coproccoccus\_3  
TACGTATGGTGAAGCGTTGTCCGGATTTACTGGGTGTAAGGGAGCGTAGACGGCTGTGTAAGTCTGAAGTAAAAGCCC  
GGGGCTCAACCCCGGACTGCTTTGAAACTATGCAGCTAGAGTGTGGAGAGGTAAGTGAATTCCCTAGTGTAGCGGTG  
AAATGCGTAGATATTGGGAGGAACACCAGTGGCGAAGGCGCTTACTGGACGATGACTGACGTTGAGGCTCGAAAGCGTG  
GGGAG  
>ASV:2076:Genus:Oscillibacter  
TACGTAGGGAGCGAGCGTTGTCCGGATTTACTGGGTGTAAGGGAGCGTAGACGGGCTGGTAAGTCAAGTGTGAAATCCG  
TGGGCTTAACCCACGAACTGCATTTGAAACTGCTGGTCTTGTAGTACCGGAGAGGTTATCGGAATTCCTTGTGTAGCGGTG  
AAATGCGTAGATATAAGGAAGAACCACAGTGGCGAAGGCGGATAACTGGACGGCAACTGACGTTGAGGCTCGAAAGCGTG  
GGGAG  
>ASV:2077:Genus:Lachnospiraceae\_NK4A136\_group  
TACGTAGGGGCAAGCGTTATCCGGATTTACTGGGTGTAAGGGAGCGTAGACGGCAAGGCAAGTCTGGAGTAAAAGCCC  
GGTGCTTAACCCCGGACTGCTTTGAAACTGTTTGGCTGGAGTGCAGGAGAGGTAAGCGGAATTCCTAGTGTAGCGGTG  
AAATGCGTAGATATTAGGAAGAACCACAGTGGCGAAGGCGCTTACTGGACGGTAAGTACGTTGAGGCTCGAAAGCGTG  
GGGAG  
>ASV:2078:Species:variabile  
AACGTAGGGTGAAGCGTTGTCCGGAAATTACTGGGTGTAAGGGAGCGCAGGCGGACCGGCAAGTTGGAAGTAAAATCTA  
TGGGCTCAACCCATAAAATTGCTTTCAAACCTGCTGGCTTGTAGTGTGACAGAGGTAGGTGGAATTCCTGGTGTAGCGGTG  
GAATGCGTAGATATCGGAGGAACACCAGTGGCGAAGGCGACTTACTGGCACCAACTGACGCTGAGGCTCGAAAGCATG  
GGTAG  
>ASV:2079:Species:aureus  
TACATAGGTGGCAAGCGTTATCCGGAAATTATTGGGCGTAAAGCGCGCTAGGCGGTTTTTTAAGTCTGATGTGAAAAGCCC  
ACGGCTCAACCGTGGAGGGTATTGAAACTGGAACCTTGTAGTGCAGAAAGAGGAAAGTGAATTCCATGTGTAGCGGTG  
AAATGCGCAGAGATATGGAGGAACACCAGTGGCGAAGGCGACTTCTGGTCTGTAAGTACGCTGATGTGCGAAAGCGTG  
GGGAT  
>ASV:2080:Family:Ruminococcaceae  
TACGTAGGTGGCAAGCGTTATCCGGAAATTACTGGGTGTAAGGGAGCGCAGGCGGGATGCAAGTCAAGTGTGAAAACCTA  
TGGGCTCAACCCATAAACTGCAGTTGAAACTGTTGTTCTTGTAGTGGAGTAGAGGCAAGCGGAATTCCTAGTGTAGCGGTG  
AAATGCGTAGATATTGGAGGAACACCAGTGGCGAAGGCGCTTGTGGGCTCTAACTGACGCTGAGGCTCGAAAGTGTG  
GGGAG  
>ASV:2081:Species:nishinomiyaensis  
TACGTAGGGTGGCAGCGTTGTCCGGAAATTATTGGGCGTAAAGAGCTTGTAGGCGGTTTTGTCGCTGCTGTGAAAAGACC  
GGGGCTTAACCTCCGTTCTGCAGTGGGTACGGGCAGACTAGAGTGTGGTAGGGGAGACTGGAATTCCTGGTGTAGCGGTG  
AAATGCGCAGATATCAGGAGGAACACCAGTGGCGAAGGCGACTTCTGGGCCATTACTGACGCTGAGAAGCGAAAGCATG  
GGGAG  
>ASV:2082:Genus:Ruminococcaceae\_UCG-014  
TACGTAGGGAGCAAGCGTTATCCGGATTTATTGGGTGTAAGGGTGCCTAGACGGGAGATTAAGTTAGTTGTGAAAAGCCC  
TTGGCTTAACCTGAGGAATTGCAACTAAAATGGTTTTCTTGTAGTGCAGGAGAGGTAAGTGAATTCCCTAGTGTAGCGGTG  
AAATGCGTAGATATTAGGAGGAACACCAGTGGCGAAGGCGACTTACTGGACTGTAAGTACGCTGAGGCTGAGGCTCGAAAGTGTG  
GGGAG  
>ASV:2083:Genus:Terrisporobacter  
TACGTAGGGGCTAGCGTTATCCGGATTTACTGGGCGTAAAGGGTGCCTAGGTGGTTTTCTTAAGTCAAGGAGTAAAAGGCT  
ACGGCTCAACCGTAGTAAGCTTTGAAACTGGGAACTTGTAGTGCAGGAGAGGAAAGTGAATTCCCTAGTGTAGCGGTG  
AAATGCGTAGATATTAGGAGGAACACCAGTGGCGAAGGCGCTTCTGGACTGTAAGTACACTGACACTGAGGCTCGAAAGCGTGG  
GGAGC  
>ASV:2084:Family:Lachnospiraceae  
TACGTAGGGGCAAGCGTTATCCGGATTTACTGGGTGTAAGGGAGCGTAGACGGCTGTGTAAGTCTGATGTGAAAAGACC  
GGGGCTCAACCCCGGCTGCATTGAAACTATATAGCTAGAGTGTGGAGAGGTAAGTGAATTCCCTAGTGTAGCGGTG  
AAATGCGTAGATATTAGGAGGAACACCAGTGGCGAAGGCGCTTACTGGACGATGACTGACGTTGAGGCTCGAAAGCGTG  
GGGAG  
>ASV:2085:Genus:Oscillospira  
TACGTAGGTGGCAAGCGTTGTCCGGATTTACTGGGTGTAAGGGAGCGTAGACGGGCTGGCAAGTCAAGTGTGAAATCTG  
GAGGCTCAACCTCAAACCTGCATTTGAAACTGCTGATCTTGTAGTATCGGAGAGGTAATCGGAATTCCTAGTGTAGCGGTG  
AAATGCGTAGATATTAGGAGGAACACCAGTGGCGAAGGCGGATTTACTGGACGACAACTGACGTTGAGGCTCGAAAGCGTG  
GGGAG  
>ASV:2086:Genus:Veillonella  
TACGTAGGTGGCAAGCGTTGTCCGGAAATTATTGGGCGTAAAGCGCGCGCAGGCGGATCTGCCAGTCTGTCTTAAAAGTTT  
GGGGCTCAACCCCGTGTGGATGGAACTACAGATCTAGAGTATCGGAGGGGAAAGTGAATTCCCTAGTGTAGCGGTG  
AAATGCGTAGATATTAGGAGGAACACCAGTGGCGAAGGCGACTTCTGGACGATCACTGACGCTGAGGCTCGAAAGCGG  
GGAGC

>ASV:2087:Genus:Butyricimonas  
TACGGGGGATGCGAGCGTTATCCGGATTTATTGGGTTAAAGGGCGCGTAGGCGGGACGACAAGTCAGCGGTAAAAGACT  
GCAGCTAAACTGTAGCACGCCGTTGAAACTGTGACCTGGAGACGAGACGAGGGAGGCGGAACAAGTGAAGTAGCGGTGA  
AATGCATAGATATCACTTGGAAACCCGATAGCGAAGGCAGCTTCCAGGCTCGATCTGACGCTGATGCGCGAGAGCGTGG  
GTAGC

>ASV:2088:Family:Prevotellaceae  
TACGGAAGGTCCAGGCGTTATCCGGATTCATTGGGTTAAAGGGAGCGTAGGCCGCCTTTAAAGCGTGTGTGAAATGTA  
GGGGCTCAACCCCTGCACTGCAAGCGCAACTGGAGAGCTTGAGTACACACAAAGTAGCGGAATTCATGGTGTAGCGGTG  
AAATGCTTAGATATACGAAGAACTCCGATTGCGAAGGCAGCTCACTGGAGGCAACTGACGCTGAAGCTCGAAAGTGCG  
GGTAT

>ASV:2089:Family:Ruminococcaceae  
TACGTAGGGAGCAAGCGTTGTCCGGAATTACTGGGTGTAAGGGTGCCTAGGCGGGCTTGAAGTCAGCCGTGAAATCCC  
GGGGCTTAACCCCGGACTGCGGTTGAAACTGTGAGTCTTGAGTGAAGTAGAGGTAGCGGAATTCCTAGTGTAGCGGTG  
GAAATGCGTAGAGATCGGGAGGAACACCAGTGGCGAAGGCGGCTTACTGGGCTTTAACTGACGCTGAGGCACGAAAGTGT  
GGTA

>ASV:2090:Genus:Dialister  
TACGTAGGTGGCAAGCGTTGTCCGGAATTATTGGGCGTAAAGCGCGCAGGCGGCTTCTTAAGTCCATCTTAAAAGTGC  
GGGGCTTAACCCCGTACTGCACTGGAACTGAGGGGCTGGAGTATCGGAGAGGAAAGTGAATTCCTAGTGTAGCGGTGA  
AATGCGTAGAGATTAGGAAGAACACCGGTGGCGAAGGCGACTTTCTGGACGCAACTGACGCTGAGGCGCAAGGCGTGG  
GGAGC

>ASV:2091:Genus:Agathobacter  
TACGTATGGTGAAGCGTTATCCGGATTTACTGGGTGTAAGGGAGTGCAGGCGGTGCGGCAAGTCTGATGTGAAAGCCC  
GGGGCTCAACCCCGTACTGCACTGGAACTGTGCTACTAGAGTGTGCGAGGGTAAGTGAATTCCTAGTGTAGCGGTG  
AAATGCGTAGATATTAGGAGGAACACCAGTGGCGAAGGCGGCTTACTGGACGATAACTGACGCTGAGGCTCGAAAGCGTG  
GGGAG

>ASV:2092:Genus:Ruminococcaceae\_UCG-014  
TACGTAGGGAGCAAGCGTTATCCGGATTTATTGGGTTAAAGGGTGCCTAGACGGGAGAAACAAGTTGGTTGTGAAATCCC  
TCGGCTTAACCCCGGACTGCAACCAAACTATTTTTCTTGAGTGTGCGAGAGGAAAGTGAATTCCTAGTGTAGCGGTG  
AAATGCGTAGATATTAGGAGGAACACCAGTGGCGAAGGCGACTTTCTGGACGATAACTGACGCTGAGGCGCAAGGCGTGG  
GGAG

>ASV:2093:Genus:Sutterella  
TACGTAGGGTGAAGCGTTAATCGGAATTACTGGGCGTAAAGGGTGCAGGCGGCTGTGCAAGACAGATGTGAAATCCC  
CGGGCTTAACCTGGGAACTGCACTTTGTGACTGCATGGCTAGAGTTTGTGAGAGGAGGTTGAATTCCTAGTGTAGCAGTG  
AAATGCGTAGATATGCGGAAGAACACCAATGGCGAAGGCAGCCCTCTGGACATGACTGACGCTCATGACGAAAGCGTG  
GGGAG

>ASV:2094:Genus:Mycoplasma  
TACATAGGTGCAAGCATTATTCGGATTTATTGGGCGTAAAGCAAGCGCAGGCGGATGTGTAAGTTCTGTGTTAAAAGTA  
GCTACTCAATAGTTGTTTGCACCGAATACTACATGTCTAGAATGTGGTAGGAAGTTTTGGAATTAACATGGAGCGGTGG  
AATGTGTAGATATGTTTAAAGAACCCGAGGCGAAGGCGAAACTTAGGCCATAAATTGACGCTTAGGCTTGAAGTGTGG  
GGAGC

>ASV:2095:Family:Peptococcaceae  
TACGTAGGGAGCAAGCGTTGTCCGGAATTACTGGGCGTAAAGGGCGCTAGGTGGACATTTAAGTCAGATGTGAAAACCTC  
TGGGCTCAACTTGGAGATTGCACTTTGAAACTGGACGCTTGGAGGTAGGAGAGGAAAGTGAATTCCTAGTGTAGCGGTG  
AAATGCGTAGATATTAGGAGGAACACCAGTGGCGAAGGCGACTTTCTGGACTATACCTGACACTGAGGCGCAAGGCGTG  
GGGAG

>ASV:2096:Species:carnosus/condimenti/haemolyticus/piscifermentans/simulans  
TACGTAGGTGGCAAGCGTTATCCGGAATTATTGGGCGTAAAGCGCGCTAGGCGGTTTTTAAAGTCTGATGTGAAAGCCC  
ACGGCTCAACCGTGGAGGTCATTGAAACTGGAACCTTGGAGTGCAGAAAGGAAAGTGAATTCCTAGTGTAGCGGTG  
AAATGCGCAGAGATATGGAGGAACACCAGTGGCGAAGGCGACTTTCTGGTCTGCAACTGACGCTGATGTGCAAGGCGTG  
GGAT

>ASV:2097:Genus:Staphylococcus  
TACGTAGGTGGCAAGCGTTATCCGGAATTACTGGGCGTAAAGCGCGCTAGGTGGTTTTTAAAGTCTGATGTGAAAGCCC  
ACGGCTCAACCGTGGAGGTCATTGAAACTGGAACCTTGGAGTGCAGAAAGGAAAGTGAATTCCTAGTGTAGCGGTG  
AAATGCGCAGAGATATGGAGGAACACCAGTGGCGAAGGCGACTTTCTGGTCTGTAACCTGACGCTGATGTGCAAGGCGTG  
GGGAT

>ASV:2098:Genus:UC5-1-2E3  
TACGTAGGGGGCAAGCGTTATCCGGAATTACTGGGTGTAAGGGAGCGTAGACGGCAGCAAGTCTGAAGTGAATCCC  
TGGGCTCAACCCGGAACTGCTTTGAAACTGTTGGGCTGGAGTGTGCGAGAGGCAAGCGGAATTCCTAGTGTAGCGGTG  
AAATGCGTAGATATTAGGAGGAACACCAGTGGCGAAGGCGGCTTCTGGACAGTAACTGACGCTGAGGCTCGAAAGCGTG  
GGGAG

>ASV:2099:Family:Ruminococcaceae  
TACGTAGGGAGCGAGCGTTGTCCGGAATTACTGGGTGTAAGGGTGCCTAGGCGGGCAGTCAAGTCAGACGTGAAATCTA  
TGGGCTTAACCCATAGTCTGCGTTTGAACCTGAATGTCTTGAGTGAAGTAGAGGTAAAGCGGAATTCCTAGTGTAGCGGTG  
AAATGCGTAGAGATCGGGAGGAACACCAGTGGCGAAGGCGGCTTACTGGGCTTTTACTGACGCTGAGGCACGAAAGCATG  
GGTAG

>ASV:2100:Family:Ruminococcaceae  
TACGTAGGGAGCAAGCGTTGTCCGGAATTACTGGGTGTAAGGGAGCGTAGGCGGGAATGCAAGTTGAATGTCAAAACTA  
CCGGCTTAACCTGGTAGCGGTTCAAACCTGCGTTTCTTGAGTGAAGTAGAGGCGAGGCGGAATTCCTAGTGTAGCGGTG

AATGCGTAGATATTAGGAGGAACACCAGTGGCGAAGGCGGCCTGCTGGGCTTTTACTGACGCTGAGGCTCGAAAAGTGTGG  
GTAGC  
>ASV:2101:Genus:Ruminococcaceae\_UCG-014  
TACGTAGGGAGCGAGCGTTATCCGGATTTATTGGGTGTAAAGGGTGCCTAGACGGGAAGTTAAGTTAGTTGTGAAATCCC  
TCGGCTCAACTGAGGAACTGCAACTAAAAGTATTTTCTTGAGTGTGGAGAGGAAAGTGAATTCCTAGTGTAGCGGTG  
AAATGCGTAGATATTAGGAGGAACACCAGTGGCGAAGGCGACTTTCTGGACAATAACTGACGTTGAGGCACGAAAAGTGTG  
GGGAG  
>ASV:2102:Genus:Ruminococcaceae\_UCG-010  
TACGTAGGTGGCGAGCGTTATCCGGATTTACTGGGTGTAAAGGGTGTGTAGGCGGGAAGCAAGTCAGATGTGAAAACCTA  
TGGGCTCAACCCATAGCCTGCATTTGAAACTGTTTTTCTTGAGAGTGGAGAGGTAAGTGAATTCCTGGTGTAGCGGTG  
AAATGCGTAGATATTAGGAGGAACATCTGTGGCGAAGGCGACTTACTGGACGATTACTGACGCTGAGACACGAAAAGCGTG  
GGGAG  
>ASV:2103:Species:coli  
TACGGAGGGTGAAGCGTTAATCGGAATTACTGGGCGTAAAGCGCACGCAGGCGGTTTGTAAAGTCAGATGTGAAATCCC  
CGGGCTCAACCTGGGAACTGCATCTGATACTGGCAAGCTTGTAGTCTCGTAGAGGGGGTGAATTCACGCTGTAGCGGTG  
AAATGCGTAGAGATCTGGAGGAATACCGGTGGCGAAGGCGGCCCTGGACGAAGACTGACGCTCAGGTGCGAAAAGCGTG  
GGGAG  
>ASV:2104:Genus:Corynebacterium  
TACGTAGGGTGCAGCGTTGTCCGGAATTACTGGGCGTAAAGAGCTCGTAGGTGGTTTGTCCGCTCGTCTGTGAAATCCC  
GGGGCTTAACCTCGGGCGTGCAGGCGATACGGGCATAACTTGTAGTGTGTAGGGGAGACTGGAATTCCTGGTGTAGCGGT  
GGAATGCGCAGATATTAGGAGGAACACTGATGGCGAAGGCGAGTCTCTGGGAGTAACTGACGCTGAGGAGCGAAAAGCAT  
GGGGA  
>ASV:2105:Genus:Desulfovibrio  
TACGGAGGGTGAAGCGTTAATCGGAATCACTGGGCGTAAAGCGCTCGTAGGCTGTTTGGTCAAGTCAGATGTGAAAAGCCC  
TCGGCTTAACCGGGAACTGCATTTGATACTGCCAGACTTGTAGTGTGGAGAGGGTGGCGGAATTCAGGTGTAGGAGTG  
AAATCCGTAGATATTAGGAGGAACACCAGTGGCGAAGGCGGCCACTGGACGAACACTGACGCTGAGGAGCGAAAAGCGTG  
GGGAG  
>ASV:2106:Order:CCD24  
TACGGAGGGTGAAGCGTTAATCGGAATCACTGGGCGTAAAGCGCACGCAGGTGGCTGAGATAGTCTGATTGTGAAAAGCCC  
TGGGCTTAACCTGGGAATTGCAGTGCATACTACTCGGCTAGAGTATGGGAGAGGGCAGTGAATTCCTGGTGTAGCGGTG  
AAATGCGTAGATATTAGGAGGAACACTGATGGCGAAGGCGGCTGCTGGCCCAATACTGACACTCAGGTGCGACAGCGTG  
GGGAG  
>ASV:2107:Genus:Aquabacterium  
TACGTAGGGTGCAGCGTTAATCGGAATCACTGGGCGTAAAGCGTGCAGGCGGCTTTGCAAGACAGAGGTGAAATCCC  
CGGGCTCAACCTGGGAACTGCATTTGTACTGCAAGCTAGAGTACGGCAGAGGGGGATGGAATTCCTGGTGTAGCAGTG  
AAATGCGTAGATATTAGGAGGAACACCAGTGGCGAAGGCAATCCCCTGGGCTGTACTGACGCTCATGCACGAAAAGCGTG  
GGGAG  
>ASV:2108:Family:Christensenellaceae  
TACGTAGGGAGCAAGCGTTGTCCGGAATTACTGGGCGTAAAGGGTGCCTAGGCGGTTTGTCAAGTCGAATGTGAAATACC  
GGGGCTCAACCCCGGGGCTGCATTCGAAACTGGCAGACTTGTAGTGCAGGAGAGGAAAGCGGAATTCCTAGTGTAGCGGTG  
AAATGCGTAGATATTAGGAGGAACACCAGTGGCGAAGGCGGCTTTCTGGACTGTAACACTGACGCTGAGGCACGAAAAGCGTG  
GGGAG  
>ASV:2109:Family:Peptococcaceae  
TACGTAGGGAGCAAGCGTTGTCCGGAATTACTGGGCGTAAAGGGCGCGTAGGTGGATGTTTAAAGTCAGATGTGAAAACCTC  
CGGGCTCAACCTGGAGACTGCATTTGAAACTGGATATCTTGGAGGTAGGAGAGGAAAGTGAATTCCTAGTGTAGCGGTG  
AAATGCGTAGATATTAGGAGGAACACCAGTGGCGAAGGCGACTTTCTGGACTATACTGACACTGAGGCGCGAAAAGCGTG  
GGGAG  
>ASV:2110:Genus:Agathobacter  
TACGTATGGTGAAGCGTTATCCGGATTTACTGGGTGTAAAGGGAGCGCAGGCGGTGCGGCAAGTCTGATGTGAAAAGCCC  
GGGGCTCAACCCAGTACTGCATTTGAAACTGTCGTAAGTGTGGAGGGGTAAGCGGAATTCCTAGTGTAGCGGTG  
AAATGCGTAGATATTAGGAGGAACACCAGTGGCGAAGGCGGCTTACTGGACGATAACTGACGCTGAGGCTCGAAAAGCGTG  
GGGAG  
>ASV:2111:Genus:Parabacteroides  
TACGGAGGATCCGAGCGTTATCCGGATTTATTGGGTTTAAAGGGTGCCTAGGCGGCCTTTTAAAGTCAGCGGTGAAAAGTCT  
GTGGCTCAACCATAGAAATGCGGTTGAAACTGGGAGGCTTGTAGTATGTTTGGAGGAGCGGGAATGCGTGGTGTAGCGGTG  
AAATGCTTAGATATCACGAAGAACTCCGATTGCGAAGGCGAGTCACTAGACTGCAACTGACACTGATGCTCGAAAAGTGTG  
GGTAT  
>ASV:2112:Family:Muribaculaceae  
TACGGAGGATCCGAGCGTTATCCGGATTTATTGGGTTTAAAGGGTGCCTAGGCGGCCTTTTAAAGTCAGCGGTGAAAAGCCC  
GGGGCTCAACCCCGGCGAGCGGTTGAAACTGGCGGGCTTGTAGTTGGAGAGAAGTATGCGGAATGCGCGGTGTAGCGGTGA  
AATGCTTAGATATCGCGCAGAACTCCGATTGCGAAGGCGAGCATAACCGGCTCCATACTGACGCTGAGGCACGAAAAGCGTG  
GGATC  
>ASV:2113:Genus:Candidatus\_Soleaferrea  
TACGTAGGTGGCAAGCGTTGTCCGGAATTACTGGGTGTAAAGGGAGCGTAGGCGGGATTGCAAGTTAAATGTGAAATCTA  
TCGGCTCAACCGGTAGTGTGTTTTAAACTGTAGTCTTGTAGTGAAGTAGAGGCAGGCGGAATTCCTAGTGTAGCGGTGA  
AATGCGTAGATATTAGGAGGAACACCAGTGGCGAAGGCGGCCTGCTGGGCTTTTACTGACGCTGAGGCTCGAAAAGTGTGG  
GTAGC  
>ASV:2114:Genus:Ruminococcaceae\_UCG-010

TACGTAGGTGGCAAGCGTTATCCGGATTTACTGGGTGTAAAGGGTGTGTAGGCGGGAAAGTGGGTCAGATGTGAAATACC  
AAGGCTAAACCATGGAGCTGCATTTGAAACTGCTTTTCTTGAGAGTGGGAGAGGTAAGCGGAATTCCTGGTGTAGCGGTG  
AAATGCGTAGATATCGGGAGGAACACCAGTGGCGAAGGCGGCTTACTGGACCATTACTGACGCTGAGACACGAAAGCGTG  
GGGAG

>ASV:2115:Genus:Ruminiclostridium\_5

TACGTAGGGAGCGAGCGTTGTCCGGATTTACTGGGTGTAAAGGGTGCCTAGGCGGCAAGGCAAGTCAGCAGTAAATCCA  
TGGGCTTAACCCATGACGTGCTGTTGAAACTGTTTTGCTTGAGTGAAGTAGAGGCGAGGCGGAATTCCTGGTGTAGCGGTG  
AAATGCGTAGATATCGGGAGGAACACCAGTGGCGAAGGCGGCTGCTGGGCTTAACTGACGCTGATGCACGAAAGTGTG  
GGTAG

>ASV:2116:Genus:Mitsuokella

TACGTAGGTGGCGAGCGTTGTCCGGAAATTATTGGGCGTAAAGGGAGCGCAGGCGGGAAGGTAAGTCTATCTTAAAAGTGC  
GGGGCTCAACCCCGTAGGGGATGGAACATCTTTCTTGAGTGCAGGAGAGGAAAGTGAATTCCTAGTGTAGCGGTGA  
AATGCGTAGATATTAGGAGGAACACCAGTGGCGAAGGCGGCTTCTGGACTGTAAGTACGCTGAGGCTCGAAAGCGGTG  
GGAGC

>ASV:2117:Family:Lachnospiraceae

TACGTATGGAGCAAGCGTTATCCGGATTTACTGGGTGTAAAGGGTGCCTAGGTGGCAGTGAAGTCAGATGTGAAAGGCC  
GGGGCTCAACCCCGAGCTGCATTTGAAACTGCTCGGCTAGGTTACAGGAGAGGCGAGGCGGAATTCCTAGTGTAGCGGTG  
AAATGCGTAGATATTAGGAGGAACACCAGTGGCGAAGGCGGCTGCTGGACTGTTACTGACACTGAGGCACGAAAGCGTG  
GGGAG

>ASV:2118:Species:gordonii

TACGGAGGATCCGAGCGTTATCCGGATTTATTGGGTTAAAGGGTGCCTAGGTGGTATTAAAGTCAGCGGTGAAAGTTT  
GTGGCTCAACCATAAAATTGCCGTTGAAACTGGTTAACTTGAGTATATTTGAGGTAGGCGGAATGCGTGGTGTAGCGGTG  
AAATGCATAGATATCACGCAGAACTCAATTGCGAAGGCGAGTACTAACTATAACTGACACTGAAGCACGAAAGCGTG  
GGGAT

>ASV:2119:Family:Enterobacteriaceae

TACGGAGGGTCAAGCGTTAATCGGAATTACTGGGCGTAAAGCGCACGCAGGCGGTCTGTTAAGTCAGATGTGAAATCCC  
CGGGCTTAACCTGGGAACTGCATTTGAAACTGGCAGGCTTGAGTCTCGTAGAGGGGGGTAGAATTCAGGTGTAGCGGTG  
AAATGCGTAGATATCGGAGGAATACCGGTGGCGAAGGCGGCCCCCTGGACGAAGACTGACGCTCAGGTGCGAAAGCGTG  
GGGAG

>ASV:2120:Genus:Gaiella

TACGTAGGGGGCAAGCGTTGTCCGGATTTATTGGGCGTAAAGAGCGTGTAGGCGGCCAGACAGGTCCGTTGTGAAAAGTGC  
GAGGCTTAACCTTCAGACGTGCATGGAAACCTGTGCTAGAGTCCGGAAGAGGAGAGTGAATTCCTGGTGTAGCGGTG  
AAATGCGCAGATATCAGGAAGAACACCCGTGGCTAAGGCGGCTCTCTAGTACGGTACTGACGCTGAGACGCGAAAGCGTG  
GGGAG

>ASV:2121:Genus:Gaiella

TACGTAGGGGGCAAGCGTTGTCCGGATTTATTGGGCGTAAAGAGCGTGTAGGCGGCCAGACAGGTCCGTTGTGAAAAGTGC  
GAGGCTTAACCTTCAGACGTGCATGGAAACCTGTGCTAGAGTCCGGAAGAGGAGAGTGAATTCCTGGTGTAGCGGTG  
AAATGCGCAGATATCAGGAAGAACACCCGTGGCTAAGGCGGCTCTCTGGGACGGTACTGACGCTGAGACGCGAAAGCGTG  
GGGAG

>ASV:2122:Kingdom:Bacteria

TACGTAGGGGGCGAGCGTTGTCCGGATTTACTGGGCGTAAAGGGCGCGTAGGCGGCATAATAAGTCTGTTGTGAAAATCC  
AGCGCTTAACCTTGGACGTGCATGGAAACTATTAAGCTCGAGTGTGGTAGAGGCAAGTGAATTCCTAGTGTAGCGGTG  
AAATGCACAGAGATTGGGAGGAACACCAGTGGCGAAGGCGACTTGTCTGGCCAAAGACTGACGCTGAAGCAGCGAAAGCGTG  
GGGAG

>ASV:2123:Order:Clostridiales

TACGTAGGGAGCGAGCGTTGTCCGGATTTACTGGGTGTAAAGGGTGCCTAGGCGGTTATGCAAGTCACATGTGAAATACC  
GGGGCTCAACCTCGGGGCTGCATGAGAACTGTATATCTTGAGTGCAGAAAGGTAAGCGGAATTCCTAGTGTAGCGGTG  
AAATGCGTAGATATTAGGAGGAACACCAGTGGCGAAGGCGGCTTACTGGGCTGTAAGTACGCTGAGGCACGAAAGCGTG  
GGGAG

>ASV:2124:Genus:Burkholderia-Caballeronia-Paraburkholderia

TACGTAGGGTGCAGCGTTAATCGGAATTACTGGGCGTAAAGCGTGCAGGCGGTTTGCTAAGACCGATGTGAAATCCC  
CGGGCTCAACCTGGGAACTGCATTTGGTACTGGCAGGCTAGAGTATGGCAGAGGGGGGTAGAATTCACGCTGTAGCAGTG  
AAATGCGTAGAGATGTGGAGGAATACCGATGGCGAAGGCGGCCCCCTGGGCAATACTGACGCTCATGCACGAAAGCGTG  
GGGAG

>ASV:2125:Genus:Escherichia/Shigella

TACGGAGGGTCAAGCGTTAATCGGAATTACTGGGCGTAAAGCGCACGCAGGCGGTTTGTAAAGTCAGATGTGAAATCCC  
CGGGCTCAACCTGGGAACTGCATCTGATACTGGCAAGCTTGAGTCTCGTAGAGGGGGGTAGAATTCAGGTGTAGCGGTG  
AAATGCGTAGAGATCTGGAGGAATACCGGTGGCGAAGGCGGCCCCCTGGACGAAGACTGACGCTCAGGTGCGAAAGCGTA  
GGGAG

>ASV:2126:Genus:Prevotella\_9

TACGGAAGGTCCGGCGTTATCCGGATTTATTGGGTTAAAGGGAGCGTAGGCGGAGATTAAGCGTGTGTGAAATGTA  
GATGCTCAACATCTGAACTGCAGCGGAACTGGTTTTCTTGAGTACGCATAAAGTGGGCGGAATTCGTGGTGTAGCGGTG  
AAATGCTTAGATATCACGAAGAATCCGATTGCGAAGGCGACTCACAGGGGCGCAACTGACGCTGAAGCTCGAAAGCGCG  
GGTAT

>ASV:2127:Genus:Lachnospiraceae\_UCG-003

TACGTAGGGGGCAAGCGTTATCCGGATTTACTGGGTGTAAAGGGAGCGTAGATGGCATGGCAAGTCTGAAGTAAAGGCC  
GGGGCTTAACCTGGGACTGCTTTGAAACTGTTAAGCTAGAGTGCAGGAGAGGTAAGCGGAATTCCTAGTGTAGCGGTG  
AAATGCGTAGATATTAGGAGGAACACCAGTGGCGAAGGCGGCTTACTGGACTGTAAGTACACTTGAAGCTCGAAAGCGTG

GGGAG

>ASV:2128:Genus:Ruminiclostridium\_5

TACGTAGGGAGCAAGCGTTGTCCGGATTTACTGGGTGTAAGGGGTGCGTAGGCGGAAGAGCAAGTCAGTAGTAAAATCTG  
GGGGCTTAACCCCAAAGTGCATTGAAACTGTTTTCTTGAGTGGAGTAGAGGTAGCGGAATTCCTGGTGTAGCGGTG  
AAATGCGTAGAGATCGGGAGGAACACCAGTGGCGAAGGCGGCTACTGGCTCTAACTGACGCTGAGGCACGAAAGTGTG  
GGTAG

>ASV:2129:Genus:Coprococcus\_3

TACGTATGGTCAAGTGTTCGGATTTACTGGGTGTAAGGGGAGCGTAGACGGCTGTGTAAGTCTGAAGTAAAAGCCC  
GGGGCTCAACCCCGGACTGCTTTGAAACTATGCAGCTAGAGTGTGCGAGAGGTAAGTGAATTCCTAGTGTAGCGGTG  
AAATGCGTAGATATTGGGAGGAACACCAGTGGCGAAGGCGGCTTACTGGACGATGACTGACGTTGAGGCTCGAAAGCGTG  
GGGAG

>ASV:2130:Genus:Anoxybacillus

TACGTAGGTGGCAAGCGTTGTCCGGATTTATTGGGCTAAAGCGCGCAGGCGGTTCTTAAGTCTGATGTAAAAGCCC  
ACGGCTCAACCGTGGAGGTCATTGAAACTGGGGGACTTGAAGTGCAGAAAGAGGAGCGGAATTCCTAGTGTAGCGGTG  
AAATGCGTAGAGATGTGGAGGAACACCAGTGGCGAAGGCGGCTCTCTGGTATGTAACGACGCTGAGGCGCAAAGCGTG  
GGGAG

>ASV:2131:Order:Bacteroidales

TACGGAGGATCCGAGCGTTATCCGGATTTATTGGGTTAAAGGGAGCGTAGGTGGACTGGTAAGTCAAGTCTGTAAAAGTTT  
GCGGCTCAACCGTAAAATTGCAAGTGTACTGTCAGTCTTGAAGTACAGTAGAGGTAGCGGAATTCCTGGTGGAGCGGTG  
GAATGCGTAGATATCGGGAGGAACACCAGTGGCGAAGGCGGCTACTGGGCTAACTGACGCTGAGGCTCGAAAGCATG  
GGTAG

>ASV:2132:Species:disiens

TACGGAAAGTCCAGGCGTTATCCGGATTTATTGGGTTAAAGGGAGTGTAGGCGGTTGGTTAAGCGTGTGTAAAATGTA  
GATGCTCAACATCTGACTTGCAGCGCAACTGGCTGACTTGAAGTACACACAACGTAGGCGGAATTCATGGTGTAGCGGTG  
AAATGCTTAGATATCATGAAGAACTCCGATTGCGAAGGCGAGTACGGGAGTGTACTGACGCTTAAGCTCGAAAGTGGC  
GGTAT

>ASV:2133:Genus:Lachnospiraceae\_UCG-001

TACGTAGGGGGCAAGCGTTATCCGGATTTACTGGGTGTAAGGGAGCGCAGGCGGTGCGCAAGTCAAGTGTAAAACCC  
GGGGCTCAACCCCGGACTGCATTTGAAACTGTCGGACTAGAGTGCAGGAGAGGTAAGTGAATTCCTAGTGTAGCGGTG  
AAATGCGTAGATATTAGGAGGAACACCAGTGGCGAAGGCGGCTTACTGGACGTAACGACGCTGAGGCTCGAAAGCGTG  
GGGAG

>ASV:2134:Family:Lachnospiraceae

TACGTAGGGGGCAAGCGTTATCCGGATTTACTGGGTGTAAGGGAGCGTAGACGGCAGTCAAGTCTGATGTAAAAGCCC  
GGGGCTCAACCCCGGACTGCATTGAAACTGTGCAGCTAGAGTGTGCGAGAGGTAAGTGAATTCCTAGTGTAGCGGTG  
AAATGCGTAGATATTAGGAGGAACACCAGTGGCGAAGGCGGCTTACTGGACGATAACGACGTTGAGGCTCGAAAGCGTG  
GGGAG

>ASV:2135:Genus:Ruminococcaceae\_UCG-010

TACGTAGGTGGCAGCGTTATCCGGATTTACTGGGTGTAAGGGGTGTGTAGGCGGGACTTCAAGTCAAGTGTAAAATTA  
CGGGCTCAACCCGTAACCTGCATTTGAAACTGAGGTTCTTGAGAGTGCAGGAGGTAAGTGAATTCCTGGTGTAGCGGTG  
AAATGCGTAGATATCGGGAGGAACACCAGTGGCGAAGGCGGTTACTGGACGACAACGACGCTGAGACACGAAAGCGTG  
GGGAG

>ASV:2136:Family:Christensenellaceae

TACGTAGGGAGCAAGCGTTGTCCGGATTTACTGGGCTAAAGGGTGCAGTGGCGGCTTAAAGTCAAGTGTAAAATACC  
CGTGCTTAACATGGGGCTGCATTTGAAACTGGATGGCTTGAAGTGCAGGAGAGGCAAGTGAATTCCTAGTGTAGCGGTG  
AAATGCGTAGATATTAGGAGGAACACCAGTGGCGAAGGCGACTTGTGGACTGTAACGACGCTGAGGCACGAAAGCGTG  
GGGAG

>ASV:2137:Family:Lachnospiraceae

TACGTATGGTCAAGCGTTATCCGGATTTACTGGGTGTAAGGGGAGCGTAGACGGGTTGCAAGTCTGATGTAAAACCC  
GGGGCTCAACCCCGGACTGCATTGAAACTGTCAATCTGGAGTACCAGGAGGTAAGCGGAATTCCTAGTGTAGCGGTG  
AAATGCGTAGATATTAGGAGGAACACCAGTGGCGAAGGCGGCTTACTGGACGTAACGACGTTGAGGCTCGAAAGCGTG  
GGGAG

>ASV:2138:Genus:Ruminococcaceae\_UCG-003

TACGTAGGTGGCAAGCGTTGTCCGGATTTACTGGGTGTAAGGGCGTGCAGCTGGGCATGCAAGTCAAGTGTAAAATCTC  
AGGGCTTAACCTGAAACTGCATTTGAAACTGTATGTCTTGAAGTGCAGGAGGTAATCGGAATTCCTTGTGTAGCGGTG  
AAATGCGTAGATATAAGGAAGAACACCAGTGGCGAAGGCGGATTACTGGACGTAACGACGTTGAGGCGCAAAGCGTG  
GGGAG

>ASV:2139:Genus:Blautia

TACGTAGGGGGCAAGCGTTATCCGGATTTACTGGGTGTAAGGGGAGCGTAGACGGCGCAGCAAGTCTGATGTAAAAGGCA  
GGAGCTTAACCCCTGACTGCATTGAAACTGCTGTGCTTGAAGTGCAGGAGGTAAGCGGAATTCCTAGTGTAGCGGTG  
AAATGCGTAGATATTAGGAGGAACACCAGTGGCGAAGGCGGCTTACTGGACGTAACGACGTTGAGGCTCGAAAGCGTG  
GGGAG

>ASV:2140:Family:Lachnospiraceae

TACGTAGGGGGCAAGCGTTATCCGGATTTACTGGGTGTAAGGGGAGTGTAGACGGCAGCGCAAGTCTGAAGTAAAAGCCC  
GGGGCTCAACCCCGAATGGCTTTGAAACTGTGCGCTAGAGTACCAGGAGGGTAAGCGGAATTCCTAGTGTAGCGGTG  
AAATGCGTAGATATTAGGAGGAACACCAGTGGCGAAGGCGGCTTACTGGACGTAACGACGTTGAGGCTCGAAAGCGTG  
GGGAG

>ASV:2141:Genus:Lachnoclostridium

TACGTAGGGGGCAAGCGTTATCCGGATTTACTGGGTGTAAGGGGAGCGTAGACGGCGAAGCAAGTCTGAAGTAAAAGCCC

GGGGCTTAACCCGGGACTGCTTTGAAACTGTTTTGCTAGAGTGCTGGAGAGGTAAGCGGAATTCCTAGTGTAGCGGTG  
AAATGCGTAGATATTAGGAGGAACACCAGTGGCGAAGGCGGCTTACTGGACAGTAACGACGTTGAGGCTCGAAAGCGTG  
GGGAG  
>ASV:2142:Genus:Bacteroides  
TACGGAGGATCCGAGCGTTATCCGGATTTATTGGTTTTAAAGGGAGCGTAGATGGATGTTTAAAGTCAGTTGTGAAAGTTT  
GCGGCTCAACCGTAAAATTGCAGTTGATACTGGATATCTTGAGTGCAGTTGAGGCAGTCGGAATTCGTGGTGTAGCGGTG  
AAATGCTTAGATATCACGAAGAACCAGTTGCGAAGGCAGCCTGCTAAGCTGCAACTGACATTGAGGCTCGAAAGGTG  
GGTAT  
>ASV:2143:Genus:Parabacteroides  
TACGGAGGATCCGAGCGTTATCCGGATTTATTGGGTTTTAAAGGGTGCCTAGGCGGCCCTTAAAGTCAGCGGTGAAAGTCT  
GTGGCTCAACCATAGAAATTGCCGTTGAAACTGGGGGCTTGAGTATGTTTGAAGGCAGCGGAATGCGTGGTGTAGCGGTG  
AAATGCTTAGATATCACGAAGAACCAGTTGCGAAGGCAGCCTGCTAAGCTGCAACTGACATTGAGGCTCGAAAGGTG  
GGTAT  
>ASV:2144:Family:Lachnospiraceae  
TACGTAGGGGCAAGCGTTATCCGGATTTACTGGGTGTAAGGGAGCGTAGACGGTCAAGCAAGTCAGAAGTAAAAGGCT  
GGGGCTCAACCCGGGACTGCTTTTGAACCTGTTGACTGGAGTGCTGGAGAGGTAAGCGGAATTCCTAGTGTAGCGGTG  
AAATGCGTAGATATTAGGAGGAACACCAGTGGCGAAGGCTGCTTACTGGACAGTAACGACGTTGAGGCTCGAAAGCGTG  
GGGAG  
>ASV:2145:Genus:Roseburia  
TACGTATGGTCAAGCGTTATCCGGATTTACTGGGTGTAAGGGAGTGACAGCGGTACGGCAAGTCTGATGTGAAAGCCC  
GGGGCTCAACCCGGTACTGCATTGGAACCTGTCGGACTAGAGTGCTGGAGGGGTAAGTGAATTCCTAGTGTAGCGGTG  
AAATGCGTAGATATTAGGAGGAACACCAGTGGCGAAGGCGGCTTACTGGACGATTACTGACGCTGAGGCTCGAAAGCGTG  
GGGAG  
>ASV:2146:Genus:Blautia  
TACGTAGGGGCAAGCGTTATCCGGATTTACTGGGTGTAAGGGAGCGTAGACGGTGTGGCAAGTCTGATGTGAAAGGCA  
TGGGCTCAACCTGTGGACTGCATTGGAACCTGCATCTTACTGAGTGCCGGAGGGGTAAGCGGAATTCCTAGCGTAGCGGTG  
AAATGCGTAGATATTAGGAGGAACACCAGTGGCGAAGGCGGCTTACTGGACGGTAACGACGTTGAGGCTCGAAAGCGTG  
GGGAG  
>ASV:2147:Genus:Erysipelatoclostridium  
TACGTAGGTGGCAAGCGTTATCCGGAAATTATTGGGCTAAAGAGGGAGCAGGCGGAATAAAGTCTGTGGTAAAAGACT  
GAAGCTCAACTTCAGTAAGCCATGGAACACAGATAGCTAGAGAGCAGAAGAGGATCGCGGAATTCATGTGTAGCGGTG  
AAATGCGTAGATATTAGGAGGAACACCAGTGGCGAAGGCGGCTTACTGGACGTAACGACGCTCAGTCCGAAAGCGTG  
GGAGC  
>ASV:2148:Genus:Parabacteroides  
TACGGAGGATCCGAGCGTTATCCGGATTTATTGGGTTTTAAAGGGTGCCTAGGCGGCCCTTTAAAGTCAGCGGTGAAAGTCT  
GTGGCTCAACCATAGAAATTGCCGTTGAAACTGGAGGGCTTGAGTATGTTTGGGGCAGGCGGAATGCGTGGTGTAGCGGTG  
AAATGCTTAGATATCACGAGAACCCGATTGCGAAGGCAGCCTGCTAAGCTGCAACTGACATTGAGGCTCGAAAGGTG  
GGTAT  
>ASV:2149:Genus:Rikenellaceae\_RC9\_gut\_group  
TACGGAGGATGCGAGCGTTATCCGGATTTATTGGGTTTTAAAGGGTGCCTAGGCGGCATTTCAAGTCAGCGGTGAAATGCC  
CTCGCTCAACGAGGGATGTGCCGTTGAAACTGAGAGGCTGGAATACGATCGACGTGGGAGGAATGTGTGGTGTAGCGGTG  
AAATGCGTAGATATCACACAGAACCAGTGGCGAAGGCATCCACGAGGCCGTAATTGACGCTGAGGCACGAAAGCGCG  
GGTAT  
>ASV:2150:Genus:Ruminococcaceae\_UCG-014  
TACGTAGGGAGCAAGCGTTATCCGGATTTATTGGGTTTTAAAGGGTGCCTAGACGGGAGATTAAGTTAGTTGTGAAAGCCC  
TCGGCTTAACGAGGAATTGCAACTAAAACCTGGTTTTCTTGAGTGCAGGAGAGGTAAGTGAATTCCTAGTGTAGCGGTG  
AAATGCGTAGATATTAGGAGGAACATCAGTGGCGAAGGCGGCTTACTGGGCTTAACTGACGCTGAGGCTCGAAAGCGTG  
GGGAG  
>ASV:2151:Species:halperniae/tenax  
TACGGAGGGTCAAGCGTTATCCGGATTTATTGGGTTTTAAAGGGTCCGTAGGCGGATCTGTAAGTCAGTGGTAAAATCTC  
ATAGCTTAACTATGAACTGCCATTGATACTGCAGGCTTTGAGTGAGATTGAGGTAGCTGGAATAAGTAGTGTAGCGGTG  
AAATGCGTAGATATTACTTAGAACACCAATTGCGAAGGCAGGTTACCAAGTCTTAACTGACGCTGATGGACGAAAGCGTG  
GGGAG  
>ASV:2152:Family:Burkholderiaceae  
TACGTAGGGTCAAGCGTTAACTCGGAATTTACTGGGCGTAAAGCGTGCAGGCGGTTTTGTAAGACAGAGGTGAAATCCC  
CGGGCTCAACCTGGGAACTGCCTTTGACTGCAAGGCTAGAGTACGGCAGAGGGGGTGAATTCGCGGTGTAGCAGTG  
AAATGCGTAGATATGCGGAGGAACACCAGTGGCGAAGGCAACCCCTGGGCTGTACTGACGCTCATGACGAAAGCGTG  
GGGAG  
>ASV:2153:Order:Clostridiales  
TACGTAGGGAGCAAGCGTTGTCCGAAATTACTGGGCGTAAAGGGTGCCTAGGCGGTCTGAAAAGTCGGATGTGAAATCCC  
CGTGTAACTATGGGAGCTGCATTGAAACTTTCCGACTTGAGTGTGAGAGGTAAGCGGAATTCGCGGTGTAGCGGTG  
AAATGCGTAGATATCGGAGGAACACCAGTGGCGAAGGCGGCTTACTGGACGAACTGACGCTGAGGCACGAAAGCGTG  
GGGAG  
>ASV:2154:Genus:Hungatella  
TACGTAGGGGCAAGCGTTATCCGGATTTACTGGGTGTAAGGGAGCGTAGACGGTAAAGCAAGTCTGAAAGTAAAAGCCC  
GGGGCTCAACCCGGTACTGCTTTTGAACCTGTATAACTGGAGTGCAAGGAGAGGTAAGTGAATTCCTAGTGTAGCGGTG  
AAATGCGTAGATATTAGGAGGAACACCAGTGGCGAAGGCGGCTTACTGGACTGTAACGACGTTGAGGCTCGAAAGCGTG  
GGGAG

>ASV:2155:Family:Ruminococcaceae  
TACGTAGGTGGCAAGCGTTGTCCGGATTTACTGGGTGTAAGGGCGTGTAGGCGGGGAAGTAAGTCAGATGTGAAATACC  
GGGGCTCAACCCCGGGCTGCATTTGAAACTGCATCTCTTGAGTGTGGAGAGGAAAGCGGAATTCCTAGTGTAGCGGTG  
AAATGCGTAGATATTAGGAGGAACACCAGTGGCGAAGGCGGCTTTCTGGACAGTAAC TGACGCTGAGGCGCAAAGCGTG  
GGGAG

>ASV:2156:Genus:Acetanaerobacterium  
TACGTAGGGAGCAAGCGTTGTCCGGAATTACTGGGTGTAAGGGAGCGTAGGCGGGTGTCAAGTTGAATGTGAAATGCA  
GAGGCTCAACCTCTGAATTGCATTCAAAAGTGCATCTTGAGTGAAGTAGAGGCAGGCGGAATTCCTAGTGTAGCGGTG  
AAATGCGTAGATATTAGGAGGAACACCAGTGGCGAAGGCGGCTTTCTGAGCTGATGCTCGAAAGCATG  
GGTAG

>ASV:2157:Species:aeruginosa/alkylphenolica/argentinensis/benzenivorans/cremoricolorata/  
cuatrocienegasensis/flavescens/fluorescens/fulva/glareae/hunanensis/mendocina/monteilii/  
mosselii/oryzihabitans/parafulva/plecoglossida/punonensis/putida/segetis/seleniipraecipitans/  
soli/straminea/taiwanensis  
TACAGAGGGTGAAGCGTTAATCGGAATTACTGGGCGTAAAGCGCGTAGGTGGTTTGTAAAGTTGGATGTGAAAGCC  
CGGGCTCAACCTGGGAACTGCATTCAAAAGTGCATCTGAGTACGGTAGAGGGTGGTGGAAATTCCTGTGTAGCGGTG  
AAATGCGTAGATATTAGGAGGAACACCAGTGGCGAAGGCGACCCTGGACTGATACTGACACTGAGGTGCGAAAGCGTG  
GGGAG

>ASV:2158:Order:Coriobacteriales  
TACGTAGGGAGCGAGCGTTATCCGGATTTATTGGGCGTAAAGCGCGTAGGCGGGCTATTAAGTCAGGTGTTAAAGCC  
GGGGCTCAACCCCGGCCCGACCTGAAACTGGTAGTCTTGAGTCTGGTAGGGGAAAGTGGAAATTCCTAGTGTAGCGGTG  
AATGCGCAGATATTGGGAAGAACACCAGTGGCGAAGGCGGCTTTCTAGGCCACGACTGACGCTGAGGCGCAAAGCTAGG  
GGAGC

>ASV:2159:Genus:Megasphaera  
TACGTAGGTGGCAAGCGTTGTCCGGAATTATTGGGCGTAAAGGGCGCGCAGGCGGCATCGAAGTCGGTCTTAAAAGTGC  
GGGGCTTAACCCCGTGAAGGGACCGAAACTGTGAAGCTCGAGTGTGCGAGAGGAAAGCGGAATTCCTAGTGTAGCGGTG  
AATGAGTAGATATTAGGAGGAACACCAGTGGCGAAGGCGGCTTTCTGAGCACAAC TGACGCTGAGGCGCAAAGCCAGG  
GGAGC

>ASV:2160:Genus:Ruminococcaceae\_NK4A214\_group  
TACGTAGGTGGCAAGCGTTATCCGGATTTACTGGGTGTAAGGGCGCGTAGGCGGGGATGCAAGTCAGATGTGAAATCTA  
TGGGCTTAACCCATAAACTGCATTTGAAACTGTATCTCTTGAGTGTGCGAGAGGTAGATGGAATTCCTGTGTAGCGGTG  
AAATGCGTAGATATAAGGAAGAACACCAGTGGCGAAGGCGATCTACTGGACGATAAC TGACGCTGAGGCGCAAAGCGTG  
GGGAG

>ASV:2161:Genus:Faecalibacterium  
AACGTAGGTACAAGCGTTGTCCGGAATTACTGGGTGTAAGGGAGCGCAGGCGGGAAGACAGGTGGAAGTGAATCTA  
TGGGCTCAACCCATAAACTGCTTTCAAAGTGTCTTTCTTGAGTGTGCGAGAGGTAGGCGGAATTCCTAGTGTAGCGGTG  
GAATGCGTAGATATTAGGAGGAACACCAGTGGCGAAGGCGGCTTACTGGCACCAACTGACGCTGAGGCTCGAAAGTGTG  
GGTAG

>ASV:2162:Genus:Neorhizobium  
TACGAAGGGGCTAGCGTTGTCCGGAATTACTGGGCGTAAAGCGCACGTAGGCGGATATTTAAGTCAGGGGTGAAATCCC  
AGAGCTCAACTCTGGAAGTGCCTTTGATACTGGGTATCTTGAGTATGGAAGAGGTAAGTGGAAATTCGAGTGTAGAGGTG  
AAATGCGTAGATATTGCGAGGAACACCAGTGGCGAAGGCGGCTTACTGGTCCATAACTGACGCTGAGGTGCGAAAGCGTG  
GGGAG

>ASV:2163:Species:xinjiangensis  
TACGGAGGGTGAAGCGTTATCCGGATTTATTGGGTTAAAGGGTCCGTAGGCGGACTGATCAGTCAGTGGTGAATCCT  
ATCGCTTAACGATAGAAGTGCATTTGAAACTGTATCTTGAGTGTGCGAGAGGTAGGCGGAATTCCTAGTGTAGCGGTG  
AAATGCTTAGATATTACGAGAACACCAATTGCGAAGGCGAGTCACTAAGTCTATATTGACGCTGATGGACGAAAGCGTG  
GGGAG

>ASV:2164:Genus:Ruminococcaceae\_UCG-002  
TACGTAGGTGGCAAGCGTTGTCCGGATTTACTGGGTGTAAGGGCGTGTAGCCGGGAAGGCAAGTCAGATGTGAAATCCA  
CGGGCTCAACTCGTGAAGTGCATTTGAAACTGTTTTCTTGAGTATCAGAGAGGCAATCGGAATTCCTAGTGTAGCGGTG  
AAATGCGTAGATATTAGGAGGAACACCAGTGGCGAAGGCGGATTGCTGGACGACAAC TGACGCTGAGGCGCAAAGCGTG  
GGGAG

>ASV:2165:Genus:Ruminococcaceae\_UCG-013  
TACGTAGGTGGCAAGCGTTGTCCGGATTTACTGGGTGTAAGGGCGTGTAGGCGGGACTTTAGGTGAGATGTGAAATACC  
GAGGCTTAACCTCGGAGTGCATTTGAAACCAAAGTCTTGAGTGCAGGAGAGGAAAGCGGAATTCCTAGTGTAGCGGTG  
AAATGCGTAGATATTAGGAGGAACACCAGTGGCGAAGGCGGCTTTCTGAGCTGATGCTCGAAAGCATG  
GGGAG

>ASV:2166:Genus:Anaerostipes  
TACGTAGGGGCAAGCGTTATCCGGAATTACTGGGTGTAAGGGTGCCTAGGTGGTATGGCAAGTCAGAAGTGAAACCC  
AGGGCTTAACCTCGGAGTGCATTTGAAACTGTGACTGACTGAGTGTGTCAGAGGAGGTAAGTGGAAATTCCTAGTGTAGCGGTG  
AAATGCGTAGATATTAGGAGGAACATCAGTGGCGAAGGCGGCTTACTGGACTGAAACTGACACTGAGGCGCAAAGCGTG  
GGGAG

>ASV:2167:Genus:Parasutterella  
TACGTAGGTGCGAGCGTTAATCGGAATTACTGGGCGTAAAGCGTGCAGGCGGTTAAGTAAGACAGATGTGAAATCCC  
TGAGCTTAACCTTAGGAATTGCATTTGACTGCTTACTGGAGTGTGTCAGAGGAGGTGGAATTCCTAGTGTAGCGGTG  
AAATGCGTAGATATTGGAAGAACACCAGTGGCGAAGGCGGCTTACTGGATAACACTGACGCTCATGCACGAAAGCGTG  
GGGAG



>ASV:2168:Genus:Romboutsia  
TACGTAGGGGGCTAGCGTTATCCGGAATTACTGGGCGTAAAGGGTGCCTAGGTGGTTTCTTAAGTCAGAGGTGAAAGGCT  
ACGGCTTAACCGTAGTAAGCCTTTGAAACTGGGAACTTGAGTGCAGGAGAGGAGAGTGAATTCCCTAGGTAGCGGTGA  
AATGCGTAGATATTAGGAGGAACACCAGTTGCGAAGGCGGCTCTCTGACTGTAACCTGACACTGAGGCACGAAAGCGTGG  
GGAGC

>ASV:2169:Genus:Faecalibacterium  
AACGTAGGTCACAAGCGTTGTCCGGAATTACTGGGTGTAAGGGAGCGCAGGCGGGAAGACAAGTTGGAAGTAAAATTCA  
TGGGCTCAACCCGACTGCATTTCAAACCTGTTTTCTTGAGTAGTGCAGAGGTAGCGGAAATCCCGGTGTAGCGGTG  
GAATGCGTAGATATCGGAGGAACACCAGTGGCGAAGGCGGCTACTGGGCACCAACTGACGCTGAGGCTCGAAAGTGTG  
GGTAG

>ASV:2170:Genus:Ruminococcaceae\_UCG-010  
TACGTAGGTGGCGAGCGTTATCCGGAATTACTGGGTGTAAGGGTGTGTAGGCGGGATGCAAGTCAGATGTGAAAATTA  
CGGGCTCAACCCGTAACCTGCATTTGAAACTGCAACTCTTGAGTATGGGAGAGGTAAAGCGGAAATCCCGGTGTAGCGGTG  
AAATGCGTAGATATCAGGAGGAACACCAGTGGCGAAGGCGGCTTACTGGACCACAACTGACGCTGAGACACGAAAGCGTG  
GGGAG

>ASV:2171:Genus:Bacteroides  
TACGGAGGATCCGAGCGTTATCCGGAATTACTGGGTGTAAGGGAGCGTAGGCGGATGTTAAGTCAGTTGTGAAAGTTT  
GCGGGTCAACCCGTAACCTGCATTTGAAACTGCAACTCTTGAGTGCAGTAGAGGTAGCGGAAATCCCGGTGTAGCGGTG  
AAATGCTTAGATATCACGAAGAACTCCGATTGCGAAGGCGGCTACTGGAGTGAACCTGACGCTGATGCTCGAAAGTGTG  
GGTAT

>ASV:2172:Genus:Faecalibacterium  
AACGTAGGTCACAAGCGTTGTCCGGAATTACTGGGTGTAAGGGAGCGCAGGCGGGTGTCAAGTTGGAAGTAAAATCCA  
TGGGCTCAACCCGACTGCATTTCAAACCTGATCGTCTTGAGTAGTGCAGAGGTAGCGGAAATCCCGGTGTAGCGGTG  
GAATGCGTAGATATCGGAGGAACACCAGTGGCGAAGGCGGCTACTGGGCACCAACTGACGCTGAGGCTCGAAAGTGTG  
GGTAG

>ASV:2173:Genus:Blautia  
TACGTAGGGGGCAAGCGTTATCCGGAATTACTGGGTATAAAGGGAGCGTAGACGGAGCAGCAAGTCTGATGTGAAAGGCG  
GGGGCTCAACCCCGGACTGCATTTGAAACTGTTGATCTTGAGTACCGGAGAGGTAAAGCGGAAATCCCTAGTGTAGCGGTG  
AAATGCGTAGATATTAGGAGGAACACCAGTGGCGAAGGCGGCTTACTGGACGTAACCTGACGTTGAGGCTCGAAAGCGTG  
GGGAG

>ASV:2174:Genus:Faecalibacterium  
AACGTAGGTCACAAGCGTTGTCCGGAATTACTGGGTGTAAGGGAGCGCAGGCGGGAAGACGAGTTGGAAGTAAAATCTA  
TGGGCTCAACCCGATAACTGCTTTCAAACCTGTTTTCTTGAGTAGTGCAGAGGTAGCGGAAATCCCGGTGTAGCGGTG  
GAATGCGTAGATATCGGAGGAACACCAGTGGCGAAGGCGGCTACTGGGCACCAACTGACGCTGAGGCTCGAAAGTGTG  
GGTAG

>ASV:2175:Genus:Pseudoxanthomonas  
TACGAAAGGGTCAAGCGTTACTCGGAATTACTGGGCGTAAAGCGTGCCTAGGTGGTGGTTAAGTCTGCTGTGAAAGGCC  
TGGGCTCAACCTGGGAATTGCAGTGGATACTGGATCACTAGAGTGTGGTAGAGGGATGCGGAAATTAAGTGTAGCAGTG  
AAATGCGTAGAGATCAGAAGGAACATCCGTGGCGAAGGCGGCTACTGGCCAACTGACACTGAGGCACGAAAGCGTG  
GGGAG

>ASV:2176:Family:Lachnospiraceae  
TACGTATGGGGCAAGCGTTATCCGGAATTACTGGGTGTAAGGGAGCGTAGGTGGTATGGCAAGTCAGAAGTAAAAGCCT  
GGGGCTCAACCCCGAATTGCTTTTCAAACCTGCAAACTAGAGTGTGCGGAGGGTAAGCGGAAATCCCTAGTGTAGCGGTG  
AAATGCGTAGATATTAGGAGGAACACCAGTGGCGAAGGCGGCTTACTGGACGACCCTGACGCTGAGGCTCGAAAGCGTG  
GGGAG

>ASV:2177:Genus:Ruminococcaceae\_NK4A214\_group  
TACGTAGGTGGCGAGCGTTATCCGGAATTACTGGGTGTAAGGGCGCGTAGGCGGGAATGCAAGTCAGATGTGAAATCCA  
AGGGCTCAACCCCTGAACTGCATTTGAAACTGATTTCTTGAGTGTGCGGAGAGGTTGACGGAATCCCTGTGTAGCGGTG  
AAATGCGTAGATATTAGGAGGAACACCAGTGGCGAAGGCGGTCAACTGGACGATAACTGACGCTGAGGCGGAAAGCGTG  
GGGAG

>ASV:2178:Genus:Agathobacter  
TACGTATGGTGCAAGCGTTATCCGGAATTACTGGGTGTAAGGGAGCGCAGGCGGTGCGCAAGTCTGATGTGAAAGGCC  
GGGGCTCAACCCCGTACTGCATTTGAAACTGTCGTAAGTGTGCGGAGGGGTGAGCGGAAATCCCTAGTGTAGCGGTG  
AAATGCGTAGATATTAGGAGGAACACCAGTGGCGAAGGCGGCTTACTGGACGATAACTGACGCTGAGGCTCGAAAGCGTG  
GGGAG

>ASV:2179:Species:massiliensis  
TACGTAGGTGGCGAGCGTTATCCGGAATGATTGGGCGTAAAGGGTGCCTAGGTGGCAGCAGATAAGTCTGGAGTAAAAGGGA  
GCGGCTCAACCCGCTGTTGGCTCTGAAACTGTCGAGCTAGAGAGCAGGAGAGGGGCGACGGAATCCATGTGTAGCGGTAA  
AATGCGTAGATATATTAGGAGGAACACCAGTGGCGAAGGCGGCTGCCTGCCTGCAACTGACACTGAAGCACGAAAGCGTG  
GGAGC

>ASV:2180:Genus:Desulfovibrio  
TACGGAGGGTGAAGCGTTAATCGGAATCACTGGGCGTAAAGGCGCACGTAGGCTGTTATGTAAGTCAGGGGTGAAATCCC  
ACGGCTCAACCGTGAAGTGCCTTACTGACGACTTGAATCCGGGAGAGGGTGGCGGAAATCCAGGTGTAGGAGTG  
AAATCCGTAGATATCTGGAGGAACATCAGTGGCGAAGGCGGCTTACTGGACCGTATTGACGCTGAGGTGCGAAAGCGTG  
GGGAG

>ASV:2181:Family:Lachnospiraceae  
TACGTAGGGGGCAAGCGTTATCCGGAATTACTGGGTGTAAGGGTGCCTAGGTGGCAAGGCAAGTCAGATGTGAAAGGCC  
GGGGCTCAACCCCGTACTGCATTTGAAACTGCTAGCTAGAGTGCAGGAGAGGTAAAGCGGAAATCCCTAGTGTAGCGGTG

AAATGCGTAGATATTAGGAGGAACATCAGTGGCGAAGGCGGCTTACTGGGCTTTAACTGACGCTGAGGCTCGAAAGCGTG  
GGGAG  
>ASV:2182:Genus:Lachnospiraceae\_NK4A136\_group  
TACGTAGGGGGCAAGCGTTATCCGGATTTACTGGGTGTAAAGGGAGCGTAGACGGTTTTGCAAGTCTGAAGTGAAAGCCC  
GGGGCTTAACCCGGGACTGCTCTGAAACTGTAGAAGTGTAGAGGAGAGGTAAGTGAATTCTAGTGTAGCGGTG  
AAATGCGTAGATATTAGGAGGAACACCAGTGGCGAAGGCGGCTTACTGGACTGTAACGACGTTGAGGCTCGAAAGCGTG  
GGGAG  
>ASV:2183:Species:carnosum/citreum/garlicum/gelidum/holzapfelii/lactis/mesenteroides/palmae/  
pseudomesenteroides  
TACGTATGTCCCAGCGTTATCCGGATTTATTGGGCGTAAAGCGAGCGCAGACGGTTGATTAAGTCTGATGTGAAAGCCC  
GGAGCTCAACTCCGGAATGGCATTGAAACTGGTTAACTTGAAGTGTGTAGAGGTAAGTGAAGTCCATGTGTAGCGGTG  
GAATGCGTAGATATTAGGAGGAACACCAGTGGCGAAGGCGGCTTACTGGACAACAACGACGTTGAGGCTCGAAAGGTG  
GGTAG  
>ASV:2184:Species:abscessus  
TACGGAGGATGCGAGCGTTATCCGGATTTATTGGGTTAAAGGGAGCGTAGATGGTTTTTAAAGTCAAGTGTCAAATGTA  
TGGGCTCAACCCCTTATTATCAGTTGAAACTGTAAAGACTTGAAGTGTGCGGTGTGGGTACATGGAATTCGTGGTGTAGCGGTG  
AATGCATAGATATCACGAAGAAGTCCGAAAGCGTAGGCAATTGACCATAGCGCCACTGACATTGATGCTCGAAGGTGCGG  
GAATC  
>ASV:2185:Genus:GCA-900066575  
TACGTAGGGGGCAAGCGTTATCCGGATTTACTGGGTGTAAAGGGAGCGTAGGCGGTCTGACAAGTCAAGAAGTGAAGCCC  
GGGGCTCAACTCCGGGACTGCTTTTGAAGTGCCTGACTAGATTGCAGGAGAGGTAAGTGAATTCTAGTGTAGCGGTG  
AAATGCGTAGATATTAGGAGGAACACCAGTGGCGAAGGCGGCTTACTGGACTGTAAGTGAAGTCAAGTGTGAGGCTCGAAAGCGTG  
GGGAG  
>ASV:2186:Genus:Lachnospira  
TACGTATGGAGCAAGCGTTATCCGGATTTACTGGGTGTAAAGGGAGTGTAGGTGGCATCACAAAGTCAAGAAGTGAAGCCC  
AGGGCTCAACCCCGGACTGCTTTTGAAGTGTGGAGCTGGAGTGCAGGAGAGGCAAGTGAATTCTAGTGTAGCGGTG  
AAATGCGTAGATATTAGGAGGAACACCAGTGGCGAAGGCGGCTTCTGGACTGTAACGACACTGAGGCTCGAAAGCGTG  
GGGAG  
>ASV:2187:Family:Lachnospiraceae  
TACGTATGGGGCAAGCGTTATCCGGATTTACTGGGTGTAAAGGGAGCGTAGGCGGCATGGCAAGTCAAGAAGTGAAGCCT  
GGGGCTCAACCCCGGAATTGCTTTTGAAGTGTGAGGCTAGAGTGTGCGAGGGGTAAGCGGAATTCTAGTGTAGCGGTG  
AAATGCGTAGATATTAGGAGGAACACCAGTGGCGAAGGCGGCTCACTGGACTGTAACGACACTGAGGCTCGAAAGCGTG  
GGGAG  
>ASV:2188:Family:Eggerthellaceae  
TACGTAGGGGGCGAGCGTTATCCGGATTTACTGGGCGTAAAGCGCGCAGGCGGCCATCAAGCGGAACCTTAATCCC  
GGGGCTCAACCCCGGCGCGGTTCCGAAGTGGTGGCTCGAGTTCGGTAGAGGAGGGTGAATTCCCGGTGTAGCGGTG  
GAATGCGCAGATATCGGAAGAACACCAGTGGCGAAGGCGGCTCTGGGCCGACACTGACGCTGAGGCGCGAAAGCTGG  
GGGAG  
>ASV:2189:Genus:Lachnospiraceae\_UCG-004  
TACGTAGGGGGCAAGCGTTATCCGGATTTACTGGGTGTAAAGGGAGCGTAGACGGCGATGCAAGTCTGAAGTGAATACC  
CGGGCTCAACCTGGGAAGTGTCTTTGAAACTGTATTGCTAGAGTGTGGAGAGGTAAGCGGAATTCTAGTGTAGCGGTG  
AAATGCGTAGATATTAGGAGGAACACCAGTGGCGAAGGCGGCTTACTGGACAGTAACGACGTTGAGGCTCGAAAGCGTG  
GGGAG  
>ASV:2190:Genus:Bacteroides  
TACGGAGGATGCGAGCGTTATCCGGATTTATTGGGTTAAAGGGAGCGCAGACGGGATGTTAAGTCAAGTGTGAAAGTTT  
GCGGCTCAACCGTAAATTTGCAAGTGTGACTGGCGTCTTGAAGTGTGAGGTTGAGGTTGCGGAATTCTGGTGTAGCGGTG  
AAATGCTTAGATATCACGAAGAAGTCCAAATTCGAAGGCGAGTCACTAAACTGTAACGACGTTGATGCTCGAAAGTGTG  
GGTAT  
>ASV:2191:Species:iners  
TACGTAGGTGGCAAGCGTTGTCCGGATTTATTGGGCGTAAAGCGAGTGCAGGCGGCTCGATAAGTCTGATGTGAAAGCCT  
TCGGCTCAACCGGAGAAATGCAATCAGAAACTGTGAGCTTGAAGTACAGAAGAGGAGAGTGAAGTCCATGTGTAGCGGTG  
AAATGCGTAGATATTAGGAGGAACACCAGTGGCGAAGGCGGCTCTCTGGTCTGTTACTGACGCTGAGGCTCGAAAGCATG  
GGTAG  
>ASV:2192:Genus:Porphyromonas  
TACGGAGGATGCGAGCGTTATCCGGAATTTATTGGGTTAAAGGGTGCAGTGTGCAAGGGAAGTCAAGGGTGAAAAGCT  
GTAGCTCAACTATGGTCTTGCCTTTGAAACTCTAGCTAGAGTGTACTGGAGGTACGTGGAACGTTGGTGTAGCGGTG  
AAATGCATAGAGATCACACAGAAGTCCGATTGCGCAGGCGAGCTACTACATTACAACGACACTGAAGCACGAAAGCGTG  
GGTAT  
>ASV:2193:Species:microcystinivorans  
TACGGAGGGAGCTAGCGTTGTTCCGAAATCACTGGGCGTAAAGCGCACGTAGGCGGCTTTGTAAGTTAGAGGTGAAAGCCC  
GGGGCTCAACTCCGGAAGTGCCTTTAAGACTGCATCGCTTGAATCTGGAGAGGTAAGTGAATTCCGAGTGTAGAGGTG  
AAATTCGTAGATATTAGGAGGAACACCAGTGGCGAAGGCGGCTTACTGGACAGAATTGACGCTGAGGTTGCGAAAGCGTG  
GGGAG  
>ASV:2194:Genus:Xylophilus  
TACGTAGGGTGAAGCGTTAATCCGAAATTTACTGGGCGTAAAGCGTGCAGGCGGTGATGTAAGACAGTTGTGAAATCCC  
CGGGCTCAACTGGGAAGTGCATCTGTGACTGCATCGCTGGAGTGCAGGAGGGGATGGAATTCCGCGTGTAGCAGTG  
AAATGCGTAGATATGCGGAGGAACACCAGTGGCGAAGGCAATCCCTGGGCTGCACTGACGCTCATGCACGAAAGCGTG  
GGGAG

>ASV:2195:Genus:Holdemania  
TACGTAGGTGGCGAGCGTTATCCGGAATTATTGGGCGTAAAGGGTGCAGGCGGTTTGAAAAGTTAAGGTGAAAGCGT  
GGGGCTTAACCCATATAGCCTTAGAACTGTAGACTAGAGTACAGGAGAGGGCAATGGAATCCATGTGTAGCGGTAA  
AATGCGTAGATATATGGAGGAACACCCAGTGGCGAAGGCGGTTGCCTGGCCTGTAACCTGACGCTCATGCACGAAAGCGTGG  
GGAGC

>ASV:2196:Genus:Alistipes  
TACGGAGGATTCAAGCGTTATCCGGATTTATTGGGTTAAAGGGTGCAGGCGGTTTGATAAGTTAGAGGTGAAATCCC  
GGGGCTTAACCCCGGAACTGCCTTAATACTGTTAGACTAGAGAGTAGTTGCGGTAGGCGGAATGTATGGTGTAGCGGTG  
AAATGCTTAGAGATCATAAGAACACCCGATTGCGAAGGCAGCTTACCAAACATATTTGACGTTGAGGCACGAAAGCGTG  
GGGAG

>ASV:2197:Family:Microbacteriaceae  
TACGTAGGGTGAAGCGTTGTCCGGAATTATTGGGCGTAAAGAGCTCGTAGGCGGTTTGTCCGCTCTGCTGTGAAATCCT  
GAGGCTCAACCTTGGGCGTGCAGTGGGTACGGGCAGACTAGAGTGCAGGAGAGATTGGAATTCCTGGTGTAGCGGTG  
GAATGCGCAGATATCAGGAGGAACACCCGATGGCGAAGGAAGATCTCTGGGCCCTACTGACGCTGAGGAGCGAAAGCATG  
GGGAG

>ASV:2198:Species:aquaticum/chlorophenolicum/frisingense/huttiense/rubrisubalbicans/seropedicae  
TACGTAGGGTGAAGCGTTAATCCGGAATTACTGGGCGTAAAGCGTGCAGGCGGTTGTGTAAGTCAGATGTGAAATCCC  
CGGGCTCAACCTTGGGCGTGCAGTGGGTACGGGCAGACTAGAGTGCAGGAGAGATTGGAATTCCTGGTGTAGCGGTG  
GAATGCGTAGATATGTGGAGGAATACCCGATGGCGAAGGCAGCCCTGGGATAACACTGACGCTCATGCACGAAAGCGTG  
GGGAG

>ASV:2199:Genus:Bifidobacterium  
TACGTAGGGTGAAGCGTTATCCGGATTTATTGGGCGTAAAGGGCTCGTAGGCGGCTCGTCCGCTCCGGTGTGAAAGTCC  
ATCGCTTAACCGTGGATCTGCCTGGGACCGGCTGAGTGCAGGAGAGACTGGAATTCAGGTGTAAACCGTGTG  
GAATGTGTAGATATCGGAAGAACACCCGATGGCGAAGGCAGGCTCTCTGGGCCCTACTGACGCTGAGGAGCGAAAGCGTG  
GGGAG

>ASV:2200:Family:Lachnospiraceae  
TACGTAGGGGGCAAGCGTTATCCGGATTTACTGGGTGTAAGGGAGCGTAGACGGAATGGCAAGTCTGATGTGAAAGGTG  
GGGGCTCAACCCCGGACTGCATTGGAACTGCCAATCTAGAGTACCGGAGGGGTAAGTGGAAATTCCTAGTGTAGCGGTG  
AAATGCGTAGATATTAGGAGGAACACCCAGTGGCGAAGGCGGCTTACTGGACGTAACGACGTTGAGGCTCGAAAGCGTG  
GGGAG

>ASV:2201:Family:Muribaculaceae  
TACGGAGGATGCGAGCGTTATCCGGATTTATTGGGTTAAAGGGTGCAGGCTGTGCATCAAGTCAGCGGTAAATCTC  
GGGGCTCAACCCCGTTTAGCGGTTGAAACTGGTGTGCTGGAGTGTGCGCAGGAAAGCGGAATGCGCGGTGTAGCGGTGA  
AATGCATAGATATTGCGCAGAACTCCGATTGCGAAGGCAGCCTTCCAGTGCATGACTGACGCTGAGGCACGAAAGCGTG  
GTATC

>ASV:2202:Genus:Dorea  
TACGTAGGGGGCAAGCGTTATCCGGATTTACTGGGTGTAAGGGAGCGTAGACGCGTGTGCAAGTCTGAAGTAAAAGGCA  
TGGGCTCAACCTGTGGACTGCTTTGAAACTGTGACGCTAGAGTGTGCGAGAGGTAAGTGGAAATTCCTAGTGTAGCGGTG  
AAATGCGTAGATATTAGGAGGAACACCCAGTGGCGAAGGCGACTTACTGGACGATGACTGACGTTGAGGCTCGAAAGCGTG  
GGGAG

>ASV:2203:Genus:Lachnoclostridium  
TACGTAGGGGGCAAGCGTTATCCGGATTTACTGGGTGTAAGGGAGCGCAGACGCGGATGCAAGTCTGAAGTAAAACCC  
GGGGCTCAACCCCGGACTGCTTTGAAACTGTATGGCTAGAGTGTGAGAGGGCAAGCGGAATTCCTAGTGTAGCGGTG  
AAATGCGTAGATATTAGGAAGAACACCCAGTGGCGAAGGCGGCTTCTGGACAGTAACGACGTTGAGGCTCGAAAGCGTG  
GGGAG

>ASV:2204:Genus:Ruminiclostridium\_9  
TACGTAGGTGGCAAGCGTTATCCGGATTTACTGGGTGTAAGGGCGTGTAGGCGGGATTGCAAGTCAGATGTGAAAATTA  
TGGGCTCAACCCATAACCTGCATTTGAAACTGTAGTTCTTGTAGTACTGGAGAGGCAGACGGAATTCCTAGTGTAGCGGTG  
AAATGCGTAGATATTAGGAGGAACACCCAGTGGCGAAGGCGGCTGCTGGACAGCAACTGACGCTGAGGCGCGAAAGCGTG  
GGGAG

>ASV:2205:Family:Lachnospiraceae  
TACGTAGGGGGCAAGCGTTATCCGGATTTACTGGGTGTAAGGGAGCGTAGACGTTAAGCGAGTCAGAAGTAAAAGGCT  
GGGGCTCAACCCCGGACTGCTTTGAAACTGTTAACTAGAGTGTGAGAGGGTAAGCGGAATTCCTAGTGTAGCGGTG  
AAATGCGTAGATATTAGGAGGAACACCCAGTGGCGAAGGCGGCTTACTGGACAGTAACGACGTTGAGGCTCGAAAGCGTG  
GGGAG

>ASV:2206:Family:Muribaculaceae  
TACGGAGGATGCGAGCGTTATCCGGATTTATTGGGTTAAAGGGTGCAGGCGGTTCTTAAGTAAGCGGTAAATCGC  
GGGGCTCAACCCCGGAGCGGTTTAGACTGGGGACTTGTAGACGGCGAGAAGTACGCGGAATGCGCGGTGTAGCGGTGA  
AATGCATAGATATGCGCAGAACTCCGATTGCGAAGGCAGCGTACCGGCGCCGTTCTGACGCTGAGGCACGAAAGCGTG  
GGATC

>ASV:2207:Genus:Tepidimonas  
TACGTAGGGTGCAGCGTTAATCCGGAATTACTGGGCGTAAAGCGTGCAGGCGGCTTGTGAAGACAGAGGTGAAATCCC  
TGGGCTCAACCTAGGAATGGCTTTGTGACTGCAAGGCTGGAGTGCAGGAGAGGGGATGGAATTCGCGTGTAGCAGTG  
AAATGCGTAGATATGCGAAGGAACACCCGATGGCGAAGGCAGTCCCCTGGGCTGCACTGACGCTCATGCACGAAAGCGTG  
GGGAG

>ASV:2208:Genus:Bacteroides  
TACGGAGGATCCGAGCGTTATCCGGATTTATTGGGTTAAAGGGAGCGTAGATGGATGTTTAAAGTCAGTTGTGAAAGTTT  
GCGGCTCAACCGTAAAATTGCAGTTGATACTGGGTTTCTTGTAGTGCAGTAGAGGTAGGCGGAATTCGTTGGTGTAGCGGTG

AAATGCTTAGATATCACGAAGAACTCCGATTGCGAAGGCAGCCTGCTAAGCTGCAACTGACATTGAGGCTCGAAAGTGTG  
GGTAT  
>ASV:2209:Order:Bacteroidales  
TACGGAGGATCCGAGCGTTATCCGGATTTATTGGGTTTAAAGGGAGCGTAGGTGGATTGTTAAGTCAGTTGTGAAAGTTT  
GCGGCTCAACCGTAAACTGCAGTTGAAACTGGTAGTCTTGAGTACAGTAGAGGTGGCGGAATTCGTGGTGTAGCGGTG  
AAATGCGTAGAGATCGGGAGGAACACCAGTGGCGAAGGCGGCTACTGGGCTTAACTGACGCTGAAGCACGAAAGCATG  
GGTAG  
>ASV:2210:Genus:Roseburia  
TACGTATGGTCAAGCGTTATCCGGATTTACTGGGTGTAAGGGAGTGCAGGCGGTACGGCAAGTCTGATGTGAAATCCC  
GGGGCTCAACCCGGTACTGCATTGAAACTGTCGGACTAGAGTGTGCGAGGGTAAGTGGAAATTCCTAGTGTAGCGGTG  
AAATGCGTAGATATTAGGAGGAACACCAGTGGCGAAGGCGGCTACTGGACGATTACTGACGCTGAGGCTCGAAAGCGTG  
GGAG  
>ASV:2211:Family:Lachnospiraceae  
TACGTAGGGGGCAAGCGTTATCCGGATTTACTGGGTGTAAGGGAGCGTAGACGGTGTGGCAAGTCTGATGTGAAAGGCA  
TGGGCTCAACCTGTGGACTGCATTGAAACTGTCATACTTGAGTGCCGGAGGGTAAGCGGAATTCCTAGTGTAGCGGTG  
AAATGCTTAGATATCACGAAGAACTCCGATTGCGAAGGCAGCTTACTAACCTGTAACGACATTGATGCTCGAAAGTGTG  
GGTAT  
>ASV:2212:Genus:Bacteroides  
TACGGAGGATCCGAGCGTTATCCGGATTTATTGGGTTTAAAGGGAGCGTAGGTGGATTGTTAAGTCAGTTGTGAAAGTTT  
GCGGCTCAACCGTAAATGCAAGTGGAACTGGGAGTCTTGAGTACAGTAGAGGTGGCGGAATTCGTGGTGTAGCGGTG  
AAATGCTTAGATATCACGAAGAACTCCGATTGCGAAGGCAGTTCCTAGACTGTTACTGACACTGATGCTCGAAAGTGTG  
GGTAT  
>ASV:2213:Genus:Ruminiclostridium\_5  
TACGTAGGGAGCAAGCGTTGTCCGGATTTACTGGGTGTAAGGGTGCCTAGGCGGCAAAGCAAGTCAGGCGTGAATCTG  
AGGGCTTAACCTCAAAGTGCCTTGAAGTGTGTTGCTTGAGTGAAGTAGAGGTAGCGGAATTCCTGGTGTAGCGGTG  
AAATGCGTAGAGATCGGGAGGAACACCAGTGGCGAAGGCGGCTACTGGGCTTAACTGACGCTGAAGCACGAAAGCATG  
GGTAG  
>ASV:2214:Family:Desulfovibrionaceae  
TACGGAGGGTGCAGCGTTAATCGGAATTACTGGGCGTAAAGCGCACGTAGGCTGTATCAAGTCAAGGGTGAATCCC  
CGGGCTCAACCTGGGAACTGCCTTTGAAACTGGTAACTGGAGTATGTGAGAGGGTGGCGGAATTCCTGGTGTAGGAGTG  
AAATCCGTAGATATCAGGAGGAACATCAGTGGCGAAGGCGGCACCTGGCACAAAACGACGCTGAGGTGCGAAAGCGTG  
GGTAG  
>ASV:2215:Genus:Dialister  
TACGTAGGTGGCAAGCGTTGTCCGGAATTATTGGGCGTAAAGCGCGCAGGCGGCTTCCCAAGTCCCTCTTAAAAGTGC  
GGGGCTTAACCCGTGATGGGAAGGAAACTGGGAAGCTGGAGTATCGGAGAGGAAAGTGAATTCCTAGTGTAGCGGTGA  
AATGCGTAGAGATTAGGAAGAACACCGGTGGCGAAGGCGACTTCTGACGAAACCTGACGCTGAGGCGGAAAGCGTG  
GGAG  
>ASV:2216:Family:Lachnospiraceae  
TACGTAGGGGGCAAGCGTTATCCGGATTTACTGGGTGTAAGGGAGCGTAGGCGGCTTGGTAAGTCAGAAGTGAAGCCC  
AGGGCTTAACCTGGGACTGCCTTTGAAACTGCCAGGCTTGATTGCCGGAGAGGTAAGTGGAAATTCCTAGTGTAGCGGTG  
AAATGCGTAGATATTAGGAGGAACACCAGTGGCGAAGGCGGCTACTGGACGGTAAATGACGCTGAGGCTCGAAAGCGTG  
GGGAG  
>ASV:2217:Family:Ruminococcaceae  
TACGTAGGGAGCGAGCGTTGTCCGGATTTACTGGGTGTAAGGGCGTGTAGGCGGACTGCAAGTCTGACGTGAAATCTG  
GTGGCTCAACACCAAACTGCCTTGGAAACTGTGGTCTTGAGTATCGGAGAGGCAGGCGGAATTCCTAGTGTAGCGGTG  
AAATGCGTAGATATTAGGAGGAACACCAGTGGCGAAGGCGGCTGCTGGACGACAACGACGCTGAGGCGGAAAGCGTG  
GGGAG  
>ASV:2218:Genus:Alloprevotella  
TACGGAAAGTCCAGGCGTTATCCGGATTTATTGGGTTTAAAGGGAGCGCAGGCGGCGGCTAAGTCAGTTGTGAAATCGT  
GCGGCTTAACCGTGCAATTGCAGTTGATACTGCGTCGCTTGAGTGCACACAGGGATGTTGGAATTCACGGTGTAGCGGTG  
AAATGCTTAGATATTGAAGAACTCCGATCGCGAAGGCATATGTCCGGAGTGAACGACGCTGAGGCTCGAAAGTGTG  
GGTAT  
>ASV:2219:Species:dentocariosa  
TACGTAGGGCGCGAGCGTTGTCCGGAATTATTGGGCGTAAAGAGCTTGTAGGCGGTTGGTCCGCTGCTGCTGTGAAAGGCT  
GGGGCTTAACCTGGTTTTGCAAGTGGGTACGGGCTAACTAGAGTGCAGTAGGGGAGACTGGAATTCCTGGTGTAGCGGTG  
GAATGCGCAGATATCAGGAGGAACACCAGTGGCGAAGGCGAGTCTCTGGGCTGTAACGACGCTGAGAAGCGAAAGCATG  
GGGAG  
>ASV:2220:Genus:Prevotella\_9  
TACGGAAAGTCCGGGCGTTATCCGGATTTATTGGGTTTAAAGGGAGCGTAGGCGGAGATTAAGCGTGTGTGAAATGTA  
GATGCTCAACATCTGAACTGCAGCGCAACTGGTTTCTTGAGTACGCACAAAGTGGGCGGAATTCGTGGTGTAGCGGTG  
AAATGCTTAGATATCACGAAGAACTCCGATTGCGAAGGCAGCTTACTGGATTGTAACGACGCTGATGCTCGAAAGTGTG  
GGTAT  
>ASV:2221:Genus:Tyzzerella  
TACGTAGGGGGCAAGCGTTATCCGGATTTACTGGGTGTAAGGGAGCGTAGGCGGTACGCCAAGCCAGATGTGAAAGCCC  
GAGGCTTAACCTCGTGGATTGCATTTGAACTGGCGAGCTAGAGTACAGGAGAGGAAAGCGGAATTCCTAGTGTAGCGGTG  
GAAATGCGTAGATATTAGGAAGAACACCAGTGGCGAAGGCGGCTTTCTGGACTGAAACTGACGCTGAGGCTCGAAAGCGTG  
GGGGA  
>ASV:2222:Family:Ruminococcaceae

TACGTAGGTGGCAAGCGTTGTCCGGAATTACTGGGTGTAAAGGGAGCGCAGGCGGGGAGCAAGTCAGCTGTGAAATCCA  
TGGGCTTAACCCGTAAGTGCAGTTGAAACTGTTCTTCTTGTAGTGAAGTAGAGGTTGGCGGAATCCGAGTGTAGCGGTG  
AAATGCGTAGATATTCGGAGGAACACCGGTGGCGAAGGCGGCCAACTGGGCTTTTACTGACGCTGAGGCTCGAAAGTGTG  
GGGAG

>ASV:2223:Genus:Marvinbryantia

TACGTATGGAGCAAGCGTTATCCGGATTTACTGGGTGTAAAGGGAGCGTAGACGGCTTAGCAAGTCTGATGTGAAAGGCT  
GGGGCTCAACCCGGGACTGCATTGAAACTGTTAAGCTAGAGTGCCGGAGAGGTAAGCGGAATTCCTAGTGTAGCGGTG  
AAATGCGTAGATATTAGGAGGAACACCACTGGCGAAGGCGGCTTACTGGACGGTAACGACGTTGAGGCTCGAAAGCGTG  
GGGAG

>ASV:2224:Genus:Enterococcus

TACGTAGGTGGCAAGCGTTGTCCGATTTATTGGGCGTAAAGCGAGCGCAGGTGGTCTTTAAGTCTGATGTGAAAGCCC  
CCGGCTTAACCCGGGAGGCTATTGAAACTGGGAGACTTGAGTGCAGAAGAGGAAAGCGGAATTCCTAGTGTAGCGGTG  
AAATGCGTAGATATATTAGGAGGAACACCACTGGCGAAGGCGGCTTTCTGGTCTGTAACGACGCTGAGGCTCGAAAGCGTG  
GGGAG

>ASV:2225:Species:distasonis

TACGGAGGATCCGAGCGTTATCCGGATTTATTGGGTTAAAGGGTGCCTAGGCGGCCTTTAAGTCAAGCGGTGAAAGTCT  
GTGGCTCAACCATAGAATTGCCGTTGAAACTGGGAGGCTTGAGTATGTTTGGAGCAGGCGGAATGCGTGGTGTAGCGGTG  
AAATGCTTAGATATCACGAGAACCCGATTGCGAAGGCGAGCTGCCAAGCCATGACTGACGCTGATGCACGAAAGCGTG  
GGGAT

>ASV:2226:Genus:Bacteroides

TACGGAGGATCCGAGCGTTATCCGGATTTATTGGGTTAAAGGGAGCGTAGGCGGGTGTAAAGTCAAGTGTGAAAGTTT  
CGGGCTCAACCGTAAATTCAGTTGATACTGGCGACTTGAGTGCACAGAGGTAGGCGGAATTCGTGGTGTAGCGGTG  
AAATGCTTAGATATCACGAAGAACTCCGATTGCGAAGGCGAGTTTACTGGATTGTAACGACGCTGATGCTCGAAAGTGTG  
GGTAT

>ASV:2227:Genus:Ezakiella

TACGTAAAGGGGCGAGCGTTGTCCGGAATTATTGGGCGTAAAGAGTGCCTAGGCGGCAAATTAAGTCAAGTGTGAAACTA  
AGGGCTCAACCCCTAGATTGCATCTGAAACTGATATGCTTGAGTCAAGGAGAGGAAAGTGAATTCCTAGTGTAGCGGTG  
GAATGCGTAGATATTAGGAGGAATACCGGTGGCGAAGGCGACTTTCTGGACTTGAACGACGCTGAGGCACGAAAGCGTG  
GGGAG

>ASV:2228:Genus:Butyricicoccus

TACGTAGGGAGCAAGCGTTATCCGGATTTACTGGGTGTAAAGGGCGCGCAGGCGGGCCGGCAAGTTGGAAGTGAATCTA  
TGGGCTTAACCCATAAACTGCTTTCAAACCTGCTGGTCTTGAGTGTGAGAGGCGAGCGGAATTCCTAGTGTAGCGGTG  
AAATGCGTAGATATACGGAGGAACACCACTGGCGAAGGCGGCTGCTGGACATTAACGACGCTGAGGCAGGCGAAAGCGTG  
GGGAG

>ASV:2229:Order:Mollicutes\_RF39

TACGTAGGGGGCGAGCGTTATCCGGATTTATTGGGCGTAAAGCGTGTAGGCGGTTTTAAGTCTAAGTCAAGGCC  
GAAGCTTAACCTCGGTTCTGTCTTAGAAACTGGTAGACTTGAGTGTGGTAGAGGCAAGTGAATTCCTAGTGTAGCGGTTA  
AATGCGTAGATATTAGAAGGAACACCACTGGCGAAGGCGGCTTCTGGGCCATTACTGACGCTGAGACACGAAAGCGTGG  
GGAGC

>ASV:2230:Family:Christensenellaceae

TACGTAGGGAGCGAGCGTTGTCCGGAATTACTGGGCGTAAAGGGTGCCTAGGCGGTTTTTAAAGTCAAGTGTGAAATACC  
CGGGCTTAACCCGGGGGTGCATTTGAAACTGGAAGCTTGAGTGCAGGAGAGGTAATGGAATTCCTAGTGTAGCGGTG  
AAATGCGTAGATATTAGGAGGAACACCGGTGGCGAAGGCGATTTACTGGACTGTAACGACGCTGAGGCACGAAAGCGTG  
GGGAG

>ASV:2231:Genus:Pseudochrobactrum

TACGAAGGGGGCTAGCGTTGTCCGATTTACTGGGCGTAAAGCGCACGCTAGGCGGGCTTTTAAAGTCAAGTGTGAAATCCC  
AGGGCTTAACCCGGAACGCTTTGATACTGGAAGCTTGAGTATGGAAGAGGTGAGTGAATTCGAGTGTAGCGGTG  
AAATGCTTAGATATTCGAGGAACACCACTGGCGAAGGCGGCTCACTGGTCCATTACTGACGCTGAGGTGCGAAAGCGTG  
GGGAG

>ASV:2232:Order:Micavibrionales

TACGAATGGAGCGAGCGTTGTCCGGAATCACTGGGCGTAAAGCGTGCAGGCGGTTTTGAAAGTTAGAAGTGAAGGCC  
AGGGCTCAACCTTGAATTGCTTTTAAAACCTCAAGACTAGAGTACTGGAGGGTTGGCGGAATTCGAGTGTAGCAGTG  
AAATGCGTAGATATTCGAAGGAACACCGATGGCGTAGGCGCAACTGGACAGTTACTGACGCTCATGCACGAAAGTATG  
GGGAG

>ASV:2233:Species:hercynium

TACGGAGGATCCAAGCGTTATCCGGAATCATTGGGTTTAAAGGGTCCGCTAGGCGGTTTTAGTAAAGTCAAGTGTGAAAGCCC  
ATCGCTCAACCGTGAACGGCCATTGATACTGCTGAACCTGAATTATTAGGAAGTAAC TAGAATATGTAGTGTAGCGGTG  
AAATGCTTAGAGATTACATGGAATACCAATTGCGAAGGCGGTTACTACTAATTGATTGACGCTGATGGACGAAAGCGTG  
GGTAG

>ASV:2234:Genus:Oscillibacter

TACGTAGGTGGCAAGCGTTGTCCGATTTACTGGGTGTAAAGGGCGTGCAGCGGGCCGGCAAGTCAAGTGTGAAATCTG  
GAGGCTTAACCTCAAACTGCATTTGAAACTGTTGGTCTTGAGTACCAGGAGGTTATCGGAATTCCTTGTGTAGCGGTG  
AAATGCGTAGATATAAGGAAGAACACCACTGGCGAAGGCGGATAACTGGACGGCAACTGACGCTGAGGCGCGAAAGCGTG  
GGGAG

>ASV:2235:Family:Ruminococcaceae

TACGTAGGTGGCAAGCGTTGTCCGATTTACTGGGTGTAAAGGGCGTGCAGCGGGACGGCAAGTCAAGCGGTGAAACCA  
TGGGCTCAACCCATGGCCTGCGTTTGAAGTGTGTTCTTGAGTACTGGAGAGGTTGGCGGAATTCCTAGTGTAGCGGTG  
AAATGCGTAGATATTAGGAGGAACACCACTGGCGAAGGCGGCCAACTGGACAGCAACTGACGCTGAGGCGCGAAAGCGTG

GGGAG

>ASV:2236:Genus:Bacteroides

TACGGAGGATCCGAGCGTTATCCGGATTTATTGGGTTTAAAGGGAGCGTAGGTGGACTGGTAAGTCAGTTGTGAAAGTTT  
GCGGCTCAACCGTAAAATTGCAGTTGATACTGTCACTTGTAGTACAGTAGAGGTGGCGGAATTCGTGGTGTAGCGGTG  
AAATGCTTAGATATCACGAAGAACCCCGATTGCGAAGGCAGCTCACTGGACTGCAACTGACACTGATGCTCGAAAGTGTG  
GGTAT

>ASV:2237:Family:Peptostreptococcaceae

TACGTAGGGGGCTAGCGTTATCCGGAACTTACTGGGCGTAAAGGGTGCCTAGGCGGTCTTTCAAGTCAGGAGTAAAAGGCT  
ACGGCTCAACCGTAGTAAGCTCTTGAAGCTGTAAGACTTGTAGTGCAGGAGAGGAGAGTAGAATTCCTAGTGTAGCGGTGA  
AATGCGTAGATATTAGGAGGAATACCGATTGCGAAGGCGGCTCTCTGGACTGTAAGTACGCTGAGGCACGAAAGCGTGG  
GGAGC

>ASV:2238:Species:deltae

TACGTATGGAGCAAGCGTTATCCGGATTCATTGGGCGTAAAGCGCTCGTAGGCGGTCTGTTAGTTCGGCAAGTTAAATCC  
GGGGCTCAACCCCGTCCGCTTCCGATACCGGCAGACTTGTAGTTTGGTAGGGGAAGGTGGAATTCCTAGTGTAGCGGTG  
GAATGCGCAGATATTAGGAAGAACACCGGTGGCGAAGGCGGCTTCTGGCCATAACTGACGCTGAGGAGCGAAAGCTAG  
GGGAG

>ASV:2239:Genus:Candidatus\_Stoquefichus

TACGTAGGTGGCGAGCGTTATCCGGAACTTACTGGGCGTAAAGAGGGAGCAGGCGGAATAGAGTCTGCGGTGAAAGCCC  
GAAGCTAAAATTCGGTAAGCCGTGGAACCAAATAGCTAGAGAGCAGCAGAGGATCGTGAATTCATGTGTAGCGGTGA  
AATGCGTAGATATATTAGGAGAACACCGATTGGCGAAGGCGACGATCTGGGCTGCAACTGACGCTCAGTCCGAAAGCGTGG  
GGAGC

>ASV:2240:Genus:Agathobacter

TACGTATGGTGCAGCGTTATCCGGATTTACTGGGTGTAAGGGAGCGCAGGCGGTGCGGCAAGTCTGATGTGAAAGCCC  
GGGGCTCAACCCCGTACTGCATTGGAAGTGTCTACTAGAGTGTGCGGAGGGTAAGTGAATTCCTAGTGTAGCGGTG  
AAATGCGTAGATATTAGGAGAACACCGATTGGCGAAGGCGGCTTACTGGACGATAACTGACGCTGAGGCTCGAAAGCGTG  
GGGAG

>ASV:2241:Genus:Blautia

TACGTAGGGGGCAAGCGTTATCCGGATTTACTGGGTGTAAGGGAGTGTAGACGATTAGCAAGTCTGATGTGAAAGGCA  
GGGGCTCAACCCCTGGACTGCATTGGAAGTGTCCAGTCTTGTAGTCCCGGAGAGGTAAGCGGAATTCCTAGTGTAGCGGTG  
AAATGCGTAGATATTAGGAGAACACCGATTGGCGAAGGCGGCTTACTGGACGTTAACTGACGTTGAGGCTCGAAAGCGTG  
GGGAG

>ASV:2242:Genus:Acinetobacter

TACAGAGGGTGCAGCGTTAATCCGGATTTACTGGGCGTAAAGCGTGCCTAGGCGGCTTTTTAAGTCCGGATGTGAAATCCC  
CGAGCTTAACTTGGGAATTGCATTGATACTGGGAAGCTAGAGTATGGGAGAGGATGGTAGAATTCAGGTGTAGCGGTG  
AAATGCGTAGAGATCTAGAGGAATACCGATTGGCGAAGGCGGCTTACTGGCCTAATACTGACGCTGAGGTACGAAAGCATG  
GGGAG

>ASV:2243:Genus:Flavobacterium

TACGGAGGATCCAAGCGTTATCCGGAACTTACTGGGTTTAAAGGGTCCGTAGGCGGTTTAAATAAGTCAGTGGTGAATCTG  
GTCGCTCAACGATCAAACCGCCATTGATACTGTTAGACTTGAATTATTGGGAAGTAACTAGAATATGTAGTGTAGCGGTG  
AAATGCTTAGATATTACATGGAATACCAATTGCGAAGGCGAGTTACTACCAATGGATTGACGCTGATGGACGAAAGCGTG  
GGGAG

>ASV:2244:Genus:Bacteroides

TACGGAGGATCCGAGCGTTATCCGGATTTATTGGGTTTAAAGGGAGCGTAGGCGGGTTGTTAAGTCAGTTGTGAAAGTTT  
GTGGCTCAACCATAAAATTGCCGTTGAAACTGGGTTACTTGTAGTGTGTTTGTAGTAGGCGGAATTCGTGGTGTAGCGGTG  
AAATGCTTAGATATCACGAAGAATCCGATTGCGAAGGCGAGCTTACTGGATTGTAAGTACGCTGATGCTCGAAAGTGTG  
GGTAT

>ASV:2245:Genus:Gordonibacter

TACGTAGGGGGCGAGCGTTATCCGGATTCATTGGGCGTAAAGCGCGCTAGGCGGCCGTCAAGCGGAACCTCTAACCCG  
AGGGCTCAACCCCGCGCGGTTCCGAACTGGCAGGCTCGAGTTTGGTAGAGGAAGTGAATTCCTCGGTGTAGCGGTGG  
AATGCGCAGATATCGGGGAAGAACCAGTGGCGAAGGCGAGCTTCTGGGCCATCAACTGACGCTGAGGCGCAAGGCTGG  
GGGAG

>ASV:2246:Genus:Faecalibacterium

AACGTAGGTCACAAGCGTTGTCCGGAATTACTGGGTGTAAGGGAGCGCAGGCGGGCGATCAAGTTGGAAGTGAATCCA  
TGGGCTCAACCCATGAACTGCTTCAAAGTGGTCTGTTAGTGTGCGGAGGTAGGCGGAATTCCTCGGTGTAGCGGTG  
GAATGCGTAGATATCGGGAGGAACACCGATTGGCGAAGGCGGCTTACTGGCCAACTGACGCTGAGGCTCGAAAGTGTG  
GGTAG

>ASV:2247:Genus:Butyricimonas

TACGGGGGATGCGAGCGTTATCCGGATTTATTGGGTTTAAAGGGCGCTAGGCGGGACGGCAAGTCAGCGGTAAAAGACT  
GCAGCTAAACTGTAGCGCGCGTTGAAACTGTGACCTGGAGACGAGACGAGGGAGGCGGAACAAAGTGAAGTAGCGGTGA  
AATGCATAGATATCACTTGAACCCCGATAGCGAAGGCGAGCTTCCAGGCTCGGTCTGACGCTGATGCGCGAGAGCGTGG  
GTAGC

>ASV:2248:Genus:Bacteroides

TACGGAGGATCCGAGCGTTATCCGGATTTATTGGGTTTAAAGGGAGCGTAGGTGGATTGTTAAGTCAGTTGTGAAAGTTT  
GCGGCTCAACCGTAAAATTGCAGTTGAAACTGGCAGTCTTGTAGTACAGTAGAGGTGGCGGAATTCGTGGTGTAGCAGTG  
AAATGCTTAGATATCACGAAGAATCCGATTGCGAAGGCGAGCTCACTAGACTGCAACTGACACTGATGCTCGAAAGTGTG  
GGTAT

>ASV:2249:Genus:Roseburia

TACGTAGGGGGCAAGCGTTATCCGGATTTACTGGGTGTAAGGGAGCGCAGGCGGTGCGGCAAGTCTGATGTGAAAGCCC

GGGGCTCAACCCGGGACTGCATTGGAACCTGTCGTAATTGAGTATCGGAGAGGTAAGTGAATTCCTAGTGTAGCGGTG  
AAATGCGTAGATATTAGGAGGAACACCAGTGGCGAAGGCGGCTTATTGGACGATAACTGACGCTGAGGCTCGAAAGCGTG  
GGGAG  
>ASV:2250:Genus:Dialister  
TACGTAGGTGGCAAGCGTTGTCCGGAATTATTGGGCGTAAAGCGCGCAGGCGGCTTACTAAGTCCATCTTAAAAGTGC  
GGGGCTTAACCCGTGATGGGATGGAACCTGGAAAGCTGGAGTATCGGAGAGGAAAGTGAATTCCTAGTGTAGCGGTGA  
AATGCGTAGAGATTAGGAAGAACACCGGTGGCGAAGGCGACTTTCTGGACGAAAACCTGACGCTGAGGCGCGAAAGCGTG  
GGAGC  
>ASV:2251:Species:fermentans  
TACGGAGGATCCGAGCGTTATCCGGATTTATTGGGTTTAAAGGGTGCCTAGGTGGTTTGATAAGTCAGCGGTGAAAGTTT  
GCAGCTTAACCTGTAATAATGCCGTTGAAACTGTCGGACTTGAGTGTAAATGAGGTAGCGGGAATGCGTGGTGTAGCGGTG  
AAATGCATAGATATCACGCAGAACCTCCGATTGCGAAGGCAGCTTACTAAGCTACAACGACTGAAGCACGAAAGCGTG  
GGGAT  
>ASV:2252:Family:Mitochondria  
TACGGGAGGAGCGAGCATTATCCGGAATGATTAGGCGTAAAGAGTTTGTAGGTGGTTTTTAAAGTTGAAAAAACAATT  
AAAGCTCAACTTTATACATTTTTTCAAACCTGATAAACTGGAGTATAAATAGAGGATAATGGAATTTCTATTGGAGTGAT  
AAAATACGTTGATAATAGAAGGAAGACCAAGGGCGAAGGCAATTATCTGGGTATATACTGACACTGAGAAACGAAAGCTT  
GGGTA  
>ASV:2253:Family:Mitochondria  
GACGGGGGGGGCAAGTGTCTCCGGAATGACTGGGCGTAAAGGGCACGTAGGCGGTGAATCGGGTTGAAAGTGAAGCCG  
CCAAAACCTGGCGGAATGCTCTCGAAACCAATTCCTTGAGTGAGACAGAGGAGAGTGAATTCGTGTGTAGGGGTGAA  
ATCCGGAGATCTACGAAGGAACGCCAAAAGCGAAGGCAGCTCTCGGGTCCCTACCGACGCTGAGGTGCGAAAGCATGG  
GAGCG  
>ASV:2254:Genus:Lachnospiraceae\_FC5020\_group  
TACGTAGGGGGCAAGCGTTATCCGGATTTACTGGGTGTAAGGGAGCGTAGACGGCTTTCGAAGTCTGACGTGAAACTCC  
GGGGCTCAACTCCGGAAGTGCCTGGGAACTGTAAGGCTTGAGTCCGAGAGGTAAGCGGAATTCCTAGTGTAGCGGTG  
AAATGCGTAGATATTAGGAGGAACACCAGTGGCGAAGGCGGCTTACTGGACGGCAACTGACGTTGAGGCTCGAAAGCGTG  
GGGAG  
>ASV:2255:Genus:Ruminococcaceae\_UCG-005  
TACGTAGGTGGCAAGCGTTGTCCGGATTTACTGGGTGTAAGGGCGTGTAGGCGGAGAAGCAAGTCAGAAGTGAGATCCA  
TGGGCTTAACCCATGAAGTGTCTTAAACTGTTTCCCTTGAGTATCGGAGAGGCAGGCGGAATTCCTAGTGTAGCGGTG  
AAATGCGTAGATATTAGGAGGAACACCAGTGGCGAAGGCGGCTGCTGGACGACAACGACGCTGAGGCGCGAAAGCGTG  
GGGAG  
>ASV:2256:Genus:Ruminiclostridium\_9  
TACGTAGGTGGCAAGCGTTATCCGGATTTACTGGGTGTAAGGGCGTGTAGGCGGGATTGCAAGTCAGATGTGAAAACCA  
TGGGCTCAACTCATGGCCTGCATTTGAAACTGTAGTCTTGAGTACTGGAGAGGCAGACGGAATTCCTAGTGTAGCGGTG  
AAATGCGTAGATATTAGGAGGAACACCAGTGGCGAAGGCGGCTGCTGGACAGCAACTGACGCTGAGGCGCGAAAGCGTG  
GGGAG  
>ASV:2257:Species:melaninogenica  
TACGGAAAGGTCCAGGCGTTATCCGGATTTATTGGGTTTAAAGGGAGCGTAGGCTGGAGATTAAGTGTGTGTGAAATGTA  
GACGCTCAACGTCTGAATTGACAGCGCATACTGGTTTCCCTTGAGTACGCACAACGTTGGCGGAATTCGTGCTGTAGCGGTG  
AAATGCTTAGATATGACGAAGAACCTCCGATTGCGAAGGCAGCTGACGGGAGCGCAACTGACGCTTAAGTCTGAAGGTGCG  
GGTAT  
>ASV:2258:Genus:Ruminococcaceae\_UCG-005  
TACGTAGGTTGCAAGCGTTGTCCGGATTTACTGGGTGTAAGGGCGTGTAGGCGGAGATGCAAGTTGGGAGTAAAACCA  
TGGGCTCAACCCATGAAGTGTCTCAAACCTGATCCCTTGAGTATCGGAGAGGCAAGCGGAATTCCTAGTGTAGCGGTG  
AAATGCGTAGATATTAGGAGGAACACCAGTGGCGAAGGCGGCTTCTGGACGACAACGACGCTGAGGCGCGAAAGCGTG  
GGGAG  
>ASV:2259:Genus:Family\_XIII\_UCG-001  
TACGTAGGGGGCGAGCGTTGTCCGGAATTATTGGGCGTAAAGAGTACGTAGGCGGTTTGTAAAGCGCAAGGTGAAAGGCA  
GTGGCTTAACCATTAAGCCTTGGCAACTGACAGACTTGAGTGCAGGAGAGGAAAGCGGAATTCCTAGTGTAGCGGTGA  
AATGCGTAGATATTAGGAGGAACACCAGTGGCGAAGGCGGCTTTCTGGACTGTAACCTGACGCTGAGGTACGAAAGCGTG  
GGAGC  
>ASV:2260:Genus:Salinimicrobium  
TACGGAGGATCCAAGCGTTATCCGGAATCATTGGGTTTAAAGGGTCCGTAGGCGGAACAATAAGTCAGCGGTGAAAGTTC  
GTGGCTCAACACGAAATTGCCATTGAAACTGTTGTTCTTGAGTCAATTAAGTGGTTAGAATATGTAGTGTAGCGGTG  
AAATGCATAGATATTACATAGAATACCGATTGCGAAGGCAGATCACTAATAATGTACTGACGCTGATGGACGAAAGCGTA  
GGTAG  
>ASV:2261:Order:Bacteroidales  
TACGGAGGATGCGAGCGTTATCCGGATTTATTGGGTTTAAAGGGTGCCTAGGTCCGCCGATTAAGTCAGCGGTGAAATCCA  
GTGGCTCAACCATCGGACTGCCGTTGAAACTGGCCGCTTGAGTATGATTGAGGCAGGCGGAATTCGTGGTGTAGCGGTG  
AAATGCTTAGATATACGAAGAACCTCCGATTGCGAAGGCAGCTGCTAAGCTGCAACTGACATTGAGGCTCGAAAGTGTG  
GGTAT  
>ASV:2262:Genus:Alistipes  
TACGGAGGATCCAAGCGTTATCCGGAATTTATTGGGTTTAAAGGGTGCCTAGGCGGTTTGTAAAGTTAGAGGTGAAATACC  
GGTGCCTTAACACCGGAATTGCCCTCTAATACTGTTGAACTAGAGAGTAGTTGCGGTAGGCGGAATGTATGGTGTAGCGGTG  
AAATGCTTAGAGATCATACAGAACACCAGTGGCGAAGGCAGCTTACCAAACCTATATCTGACGTTGAGGCGCGAAAGCGTG  
GGGAG

>ASV:2263:Species:intestinale  
TACGGAGGATGCGAGCGTTATCCGGATTTATTGGGTTAAAGGGTGCCTAGGCGGAATATCAAGTCAGCGGTAAAAATTC  
GGGGCTCAACCCCGTCTGCCGTTGAAACTGATGTTCTTGAGTGGGCGAGAAGTATGCCGAATGCGTGGTGTAGCGGTGA  
AATGCATAGATATCACGCAGAAGTCCGATTGCGAAGGCAGCATACCGGCGCCCAACTGACGCTGAAGCACGAAAGCGTGG  
GTATC

>ASV:2264:Genus:Parabacteroides  
TACGGAGGATCCGAGCGTTATCCGGATTTATTGGGTTAAAGGGTGCCTAGGCGGCCTTTTAAAGTCAGCGGTGAAAGTCT  
TGGGCTCAACCCATAGAAATGCGCTTGAAGACTGGGGGCTTGAGTATGTTTGAAGCAGGCGGAATTCGTGGTGTAGCGGTG  
AAATGCTTAGATATCACGAAGAAGTCCGATTGCGAAGGCAGCTTACTGGACTGTAAGTACGCTGATGCTCGAAAGTGTG  
GGTAT

>ASV:2265:Genus:Holdemania  
TACGTAGGTGGCGAGCGTTATCCGGAATTATTGGGCGTAAAGGGTGCCTAGGCGGCTTTGTTAAGTTAAGGTGAAAGCGT  
GGGGCTTAACCCATATAGCCTTAGAAACTGACAGACTAGAGTGCAGGAGAGGGCAATGGAATTCATGTGTAGCGGTAA  
AATGCGTAGATATATGGAGGAACACAGTGGCGAAGGCAGTTGCTGGCCTGTAAGTACGCTCATGCACGAAAGCGTGG  
GGAGC

>ASV:2266:Genus:Moheibacter  
TACGGAGGGTGAAGCGTTATCCGGATTCATTGGGTTAAAGGGTCCGAGGCGGGCTTGTAAAGTAAGGGGTGAAAGCCG  
GCAGCTTAACCCGTAATCGCGTTCAAAGACTGCTGGCCTTGAGTGTAGGTTGAAGTAGCTGGAATGTGTAGTGTAGCGGTG  
AAATGCTTAGATATTACACAGAACACCGATAGCGAAGGCAGTTACTAAGTCTTAAGTACGCTGAGGGACGAAAGCGTGG  
GGGAG

>ASV:2267:Genus:GCA-900066225  
TACGTAGGTAGCGAGCGTTGTCGGGAATTACTGGGTGTAAGGGAGCGTAGGCGGGAAGACAAGTTGAATGTTTAAACTA  
CCGGCTTAACCCGTAATCGCGTTCAAAGACTGTTTTCTTGAGTGAAGTAGAGGACAGGCGGAATTCCTAGTGTAGCGGTGA  
AATGCGTAGATATTAGGAGGAACACAGTGGCGAAGGCAGCTGCTGGGCTTAACTGACGCTGAGGCTCGAAAGCGTGG  
GTAGC

>ASV:2268:Genus:Subdoligranulum  
AACGTAGGGTGAAGCGTTGTCGGGAATTACTGGGTGTAAGGGAGCGCAGGCGGACCGGAAGTTGGAAGTAAAAGTAA  
TGGGCTTAACCCGTAATCGCGTTCAAAGACTGCTGGCCTTGAGTGTAGGAGGTAAGTGAATTCCTAGTGTAGCGGTG  
GAATGCGTAGATATCGGAGGAACACAGTGGCGAAGGCAGCTTACTGGGCACCAACTGACGCTGAGGCTCGAAAGCATG  
GGTAG

>ASV:2269:Genus:Blautia  
TACGTAGGGGCAAGCGTTATCCGGATTTACTGGGTGTAAGGGAGCGTAGACGGATGGACAAGTCTGATGTGAAAGGCT  
GGGGCTCAACCCCGGACTGCATTGGAAGACTGCCCGTCTTGAGTGCCGGAGAGGTAAGCGGAATTCCTAGTGTAGCGGTG  
AAATGCGTAGATATTAGGAGGAACACAGTGGCGAAGGCAGTACTGGACGTAAGTACGCTTGAAGGCTCGAAAGCGTGG  
GGAG

>ASV:2270:Order:Clostridiales  
TACGTAGGGGCGAGCGTTGTCGGATTTACTGGGCGTAAAGAGTGCCTAGGTGGCTTTACAAGTCAGATGTGAAATACC  
GCAGCTCAACTGCGGGGCTGCATCTGAAACTGTAGAGCTAGAGTACAGGAGGGGAAAGCGGAATTCCTAGTGGAGCGGTG  
AAATGCGTAGAGATTAGGAGGAACACCGTGGCGAAGGCAGCTTCTGGACTGCAACTGACACTGAGGCACGAAAGCGTGG  
GGAG

>ASV:2271:Genus:Lachnoclostridium  
TACGTAGGGGCAAGCGTTATCCGGATTTACTGGGTGTAAGGGAGCGTAGACGGCAAGCAAGTCTGAAGTAAAAGTAA  
AGGGCTCAACCCGACTGCTTTGGAAGTGTGTTGCTGGAGTGTGCGGAGAGGTAAGTGAATTCCTAGTGTAGCGGTG  
AAATGCGTAGATATTAGGAGGAACACAGTGGCGAAGGCAGCTTACTGGACGATAACTGACGTTGAGGCTCGAAAGCGTGG  
GGAG

>ASV:2272:Family:Ruminococcaceae  
AACGTAGGTCAAGCGTTGTCGGGAATTACTGGGTGTAAGGGAGCGCAGGCGGGAAGCAAGTTGGAAGTAAAATCCA  
TGGGCTCAACCCATGAAGTGTGTTCAAAGACTGTTTTCTTGAGTGTGAGGAGGTAAGTGAATTCCTAGTGTAGCGGTG  
AAATGCTTAGATATCACGAAGAAGTCCGATTGCGAAGGCAGCTTACTAACCTGTAAGTACGCTTGTGCTCGAAAGTGTG  
GGTAT

>ASV:2273:Genus:Parabacteroides  
TACGGAGGATGCGAGCGTTATCCGGATTTATTGGGTTAAAGGGTGCCTAGGCGGTGATTTAAGTCAGCGGTGAAAGTGT  
GTGGCTCAGCCATAAAATGCGCTTGAAGACTGGGTTACTTGAGTGTGTTTGAAGTAGGCGGAATGCGTGGTGTAGCGGTG  
AAATGCATAGATATCACGCAGAAGTCCGATTGCGAAGGCAGCTTACTAAACCATAACTGACACTGAAGCACGAAAGCGTGG  
GGAT

>ASV:2274:Genus:Simplicispira  
TACGTAGGGTGAAGCGTTAATCCGGAATTACTGGGCGTAAAGCGTGCAGGCGGTTATGCAAGACAGATGTGAAATCCC  
CGGGCTCAACCTGGGAATTGCATCAGTGCATAGCTTGAGTGCAGGAGGGGATGGAATTCCTAGTGTAGCAGTGT  
AAATGCGTAGATATGCGGAGGAACACCGATGGCGAAGGCAATCCCCTGGGCTGCATGACGCTCATGCACGAAAGCGTGG  
GGAG

>ASV:2275:Genus:Pseudomonas  
TACGAAGGGTGAAGCGTTAATCCGGAATTACTGGGCGTAAAGCGCGCTAGGTGGTTCAGTAAGTTGGAAGTAAAATCCC  
CGGGCTCAACCTGGGAAGTGTGTTCAAAGACTGCTGAGCTAGAGTACGGTAGAGGGTAGTGAATTCCTGTGTAGCGGTG  
AAATGCGTAGATATAGGAAGGAACACAGTGGCGAAGGCAGTACTGGACTGGTACTGACACTGAGGTGCGAAAGCGTGG  
GGAG

>ASV:2276:Genus:Defluviitaleaceae\_UCG-011  
TACGTAGGGGCAAGCGTTATCCGGATTTACTGGGTGTAAGGGTGCCTAGGCGGTACGGCAAGTTTGTATGTGAAACCCA  
TGGGCTTAACCCATGCGATGCATGAAAAGTACTGAACTAGAGTGCAGGAGAGGAAAGCGGAATTCCTAGTGTAGCGGTG



AAATGCGTAGATATTAGGAAGAACCACAGTGGCGAAGGCGGCTTTCTGGACTGCAACTGACGCTGAGGCACGAAAGCGTG  
GGGAG  
>ASV:2277:Family:Ruminococcaceae  
TACGTAGGTGGCAAGCGTTATCCGGAATTATTGGGTGTAAGGGTGCCTAGGCGGGATGTAAGTCAGATGTGAAATACG  
TGGGCTCAACCCACGAAGTGCATTTGAAACTTACGTTCTTGAGTCAAGTAGAGGCAAGCGGAATCCAGTGTAGCGGTG  
AAATGCGTAGATATTGGGAGGAACCACAGTGGCGAAGGCGGCTTCTGGGCTTGAAGTACGCTGAGGCACGAAAGTGTG  
GGGAG  
>ASV:2278:Genus:Ruminococcus\_1  
TACGTAGGGAGCGAGCGTTGTCCGGAATTACTGGGTGTAAGGGAGCGTAGGCGGGATCGCAAGTCAGATGTGAAAACCTA  
TGGGCTTAACCCATAAACTGCATTTGAAACTGTGGTCTTGAGTGAAGTAGAGGTAAGCGGAATCCAGTGTAGCGGTG  
AAATGCGTAGATATTAGGAGGAACCACAGTGGCGAAGGCGGCTTACTGGACGATCACGACGTTGAGGCTCGAAAGCGTG  
GGGAG  
>ASV:2279:Family:Burkholderiaceae  
TACGTAGGTGGCAAGCGTTAATCGGAATTACTGGGCGTAAAGCGTGCAGGCGGTTTTGTAAGACAGAGGTGAAATCCC  
CGGGCTCAACCTGGGAAGTGCCTTTGTGACTGCAAGGCTAGAGTACGGCAGAGGGGGATGGAATCCGCGTGTAGCAGTG  
AAATGCGTAGATATGCGGAGGAACCACAGTGGCGAAGGCAATCCCCTGGGCTGTACTGACGCTCATGCACGAAAGCGTG  
GGGAG  
>ASV:2280:Genus:Dielma  
TACGTAGGTGGCAAGCGTTATCCGGAATTATTGGGCGTAAAGGGTGCCTAGGCGGGAGATAAGTCTGAGGTAAAAGCC  
GTGGCTCAACCCAGGTAAAGCTTGGAAACTGTCTGGTGGAGTGCAGGAGAGGACAATGGAATCCATGTGTAGCGGTAA  
AATGCGTAGATATATGGAGGAACATCAGTGGCGAAGGCGGCTTACTGGACGTTAACTGACGTTGAGGCTCGAAAGCGTG  
GGAGC  
>ASV:2281:Family:Ruminococcaceae  
TACGTAGGTGGCAAGCGTTGTCCGGAATTACTGGGTGTAAGGGAGCGCAGGCGGGATAGCAAGTCAGTTGTGAAAACCTA  
TGGGCTCAACCCATAGATTGCAGTTGAAACTGTTATCTTGAGTGGAGTAGAGGCAAGCGGAATCCAGTGTAGCGGTG  
AAATGCGTAGATATTAGGAGGAACCACAGTGGCGAAGGCGGATTGCTGGACGACAACGACGTTGAGGCGCGAAAGCGTG  
GGGAG  
>ASV:2282:Genus:Parabacteroides  
TACGGAGGATCCGAGCGTTATCCGATTTATTGGGTTAAAGGGTGCCTAGGCGGCCCTTAAGTCAGCGGTGAAAAGTCT  
GTGGCTCAACCATAGAAATGCGTTGAAACTGGGTTACTTGAGTGTGTTTGAAGTAGCGGAATGCGTGGTGTAGCGGTG  
AAATGCATAGATATCACGCAGAATCCGATTGCGAAGGCAGCTTACTAAACCATAACTGACACTGAAGCACGAAAGCGTG  
GGGAT  
>ASV:2283:Genus:Hydrogenoanaerobacterium  
TACGTAGGTGGCAGCGTTGTCCGGAATTACTGGGTGTAAGGGAGCGTAGGCGGGAGTGAAGTTGAATGTGAAATCTA  
TCGGCTCAACCCGGTAGCTGCGTTCAAACCTGCATTTCTTGAGTGAAGTAGAGGCAAGCGGAATCCAGTGTAGCGGTGA  
AATGCGTAGATATTAGGAGGAACCACAGTGGCGAAGGCGGCTGCTGGGCTTTTACTGACGCTGATGCTCGAAAGCATGG  
GTAGC  
>ASV:2284:Genus:Pseudomonas  
TACAGAAGGTGCAAGCGTTAATCGGAATTACTGGGCGTAAAGCGCGCTAGGTGGTTTTGTTAAGTTGGATGTGAAATCCC  
CGGGCTCAACCTGGGAAGTGCATTCAAAACCTGACTGACTAGAGTATGGTAGAGGGTGGTGAATTTCCCTGTGTAGCGGTG  
AAATGCGTAGATATAGGAAGGAACCACAGTGGCGAAGGCGACCACCTGGACTAATACTGACACTGAGGTGCGAAAGCGTG  
GGGAG  
>ASV:2285:Genus:Shuttleworthia  
TACGTATGGAGCAAGCGTTATCCGATTTACTGGGTGTAAGGGAGCGTAGGCGGTGGTGAAGTCTGATGTGAAAACCC  
GGGGCTCAACCCGGGACTGCATTTGAAACTGTGCTACTGGAGTGTGCGAGGGGTAAGTGAATTTCCAGTGTAGCGGTG  
AAATGCGTAGATATTAGGAGGAACCACAGTGGCGAAGGCGGCTTACTGGACGACAACGACGCTGAGGCTCGAAAGCGTG  
GGGAG  
>ASV:2286:Genus:Eisenbergiella  
TACGTAGGGGGCAAGCGTTATCCGATTTACTGGGTGTAAGGGAGCGTAGACGGTGAAGCAAGTCTGGAGTAAAACCC  
GGGGCTTAACCCGGGATTGCTTTGAAACTGTTTAACTGGAGTGCAGGAGAGGTAAGCGGAATTCCTAGTGTAGCGGTG  
AAATGCGTAGATATTAGGAGGAACCACAGTGGCGAAGGCGGCTTACTGGACTGTAACGACGTTGAGGCTCGAAAGCGTG  
GGGAG  
>ASV:2287:Genus:Pseudomonas  
TACAGAGGGTGGCAAGCGTTAATCGGAATTACTGGGCGTAAAGCGCGCTAGGTGGTTTTGTTAAGTTGGATGTGAAATCCC  
CGGGCTCAACCTGGGAAGTGCATTCAAAACCTGACTGACTAGAGTATGGTAGAGGATGGTGAATTTCCCTGTGTAGCGGTG  
AAATGCGTAGATATAGGAAGGAACCACAGTGGCGAAGGCGACCACCTGGACTAATACTGACACTGAGGTGCGAAAGCGTG  
GGGAG  
>ASV:2288:Genus:Faecalibacterium  
AACGTAGGTCAACAGCGTTGTCCGGAATTACTGGGTGTAAGGGAGCGCAGGCGGGAAGACAAGTTGGAAGTAAAATCTA  
TGGGCTCAACCCATAAACTGCTTTCAAACCTGTTTTCTTGAGTAGTGCAGAGGTAGGCGGAATCCCGGTGTAGCGGTG  
AAATGCTTAGATATCACGAAGAACCAGTGGCGAAGGCGGCTTACTGGACTGTAGCTGACGCTGATGCTCGAAAGTGTG  
GGTAT  
>ASV:2289:Species:crocina/lucknowensis/riboflavina/soli  
TACGAAGGGGCTAGCGTTGTCCGATTTACTGGGCGTAAAGCGCACGTAAGGCGGTTTTGTTAAGTCAGGGGTGAAATCCC  
GGAGCTCAACTCCGGAAGTGCCTTTGATACTGGCAAGCTAGAGTCCGGAAGAGGTAAGTGAAGTCCCTAGTGTAGAGGTG  
GAATTCGTAGATATTAGGAAGAACCACAGTGGCGAAGGCGGCTTACTGGTCCGGAAGTACGCTGAGGTGCGAAAGCGTG  
GGGAG  
>ASV:2290:Genus:Oscillibacter

TACGTAGGTGGCAAGCGTTGTCCGGATTTACTGGGTGTAAAGGGCGTGCAGCCGGGCCGGCAAGTCAGATGTGAAATCTG  
GAGGCTTAACCTCAAACCTGCATTTGAAACTGTAGGCTTTGAGTACCGGAGAGGTTATCGGAATTTCTTGTGTAGCGGTG  
AAATGCGTAGATATAAGGAAGAACCACAGTGGCGAAGGCGGATAACTGGACGGCAACTGACGGTGAGGCGCGAAAGCGTG  
GGGAG

>ASV:2291:Genus:Intestinimonas

TACGTAGGTGGCAAGCGTTATCCGGATTTACTGGGTGTAAAGGGCGTGTAGGCGGGATTGCAAGTCAGGCGTGAAAACCTA  
TGGGCTTAACCCATAGCCTGCGTTTGAACCTGTAGTTCTTGTAGTGTGGAGAGGCAATCGGAATTCCTGTGTAGCGGTG  
AAATGCGTAGATATAACGAGGAACACCAGTGGCGAAGGCGGATTGCTGGACAGTAACGACGCTGAGGCGCGAAAGCGTG  
GGGAG

>ASV:2292:Genus:Methylobacterium

TACGAAGGGGGCTAGCGTTGCTCGGAATCACTGGGCGTAAAGGGCGCTAGGCGGCCATTCAAGTCGGGGGTGAAAACCT  
GTGGCTCAACCACAGAATTGCTTCGATACTGTTGGCTTGTAGTTGGTAGAGGTTGGTGGAACCTGCGAGTGTAGAGGTG  
AAATTCGTAGATATTCGAAGAACCACAGCGCGAAGGCGGCCAACTGGACCAATACTGACGCTGAGGCGCGAAAGCGTG  
GGGAG

>ASV:2293:Genus:Shuttleworthia

TACGTATGGAGCAAGCGTTATCCGGATTTACTGGGTGTAAAGGGAGCGTAGGCGGTCTTCAAGTCTGAAGTAAAACCC  
TGGGCTCACCCCTGGGATTGCTTTGAAAACCTGTAGGACTGGAGTGTGCGGAGGGGCATGTGGAATTCCTGGTGTAGCGGTG  
AAATGCGTAGATATCAGGAGGAACACCAGTGGCGAAGGCGGCATGCTGGACGATAACTGACGCTGATGCTCGAAAGCGTG  
GGGAG

>ASV:2294:Family:Ruminococcaceae

TACGTAGGGGGCGAGCGTTGTCCGGAACTACTGGGTGTAAAGGGAGCGCAGGCGGGAAGACAAGTTGGAAGTAAAATCCA  
TGGGCTCAACCATGAACCTGCTTTCAAACCTGTTTTCTTGTAGTAGTGCAGAGGTAGCGGGAATTCGTGGTGTAGCGGTG  
AAATGCTTAGATATCAGGAAGAACTCCGATTGCGAAGGCGAGTACTGGACTGTAACGACGCTGATGCTCGAAAGTGTG  
GGTAT

>ASV:2295:Genus:Sellimonas

TACGTAGGGGGCAAGCGTTATCCGGATTTACTGGGTGTAAAGGGAGCGTAGACGGAGCTGCAAGTCTGATGTGAAAACCC  
GGGGCTCAACCCCGGACTGCATTGAAAACCTGTAGATCTAGAGTGCAGAGGTAGCGGGAATTCCTAGTGTAGCGGTG  
AAATGCGTAGATATTAGGAGGAACACCAGTGGCGAAGGCGGCTTACTGGACGGTGACTGACGTTGAGGCTCGAAAGCGTG  
GGGAG

>ASV:2296:Genus:Pygmaibacter

TACGTAGGTGGCAAGCGTTGTCCGGAACTACTGGGTGTAAAGGGAGCGCAGGCGGGCTTCAAGTTGGATGTTTAATGGA  
GGGGCTCAACCCCTTCTCGCATTTCAAACCTGCAGGCTTGTAGTGTGAGGAGGAGGTAAGCGGGAATTCCTAGTGTAGCGGTG  
AAATGCGTAGATATCGGGAGGAACACCAGTGGCGAAGGCGGCTTACTGGACGGTGACTGACGTTGAGGCTCGAAAGCATGG  
GTAGC

>ASV:2297:Genus:Lachnospiraceae\_NK4A136\_group

TACGTAGGGGGCAAGCGTTATCCGGATTTACTGGGTGTAAAGGGAGCGTAGACGGTTTTGCAAGTCTGAAGTAAAACCC  
GGGGCTTAACCTGGGGGGTGCAATTCGAAACTGGCAGCTTGTAGTGTGGGAGAGGAAAGTGAATTCCTAGTGTAGCGGTG  
AAATGCGTAGATATTAGGAGGAACACCAGTGGCGAAGGCGGCTTACTGGACTGTAACGACGTTGAGGCTCGAAAGCGTG  
GGGAG

>ASV:2298:Order:Clostridiales

TACGTAGGGGGCAAGCGTTGTCCGGAACTACTGGGCGTAAAGGGAGCGTAGGCGGCAGCTTAAGTCAGATGTGAAATACC  
CGGGCTTAACCTGGGGGGTGCAATTCGAAACTGGCAGCTTGTAGTGTGGGAGAGGAAAGTGAATTCCTAGTGTAGCGGTG  
AAATGCGTAGATATTAGGAGGAACACCAGTGGCGAAGGCGGCTTCTGGACCATAACTGACGCTGAGGCTCGAAAGCGTG  
GGGAG

>ASV:2299:Family:Enterobacteriaceae

TACGGAGGTGCAAGCGTTAATCGGAATTTACTGGGCGTAAAGCGCACGCGAGGCGGTCTGTCAAGTCGGATGTGAAATCCC  
CGGGCTCAACCTGGGAACCTGCAATTCGAAACTGGCAGCTAGAGTCTTGTAGAGGGGGGTAGAATTCAGGTGTAGCGGTG  
AAATGCGTAGATATTAGGAGGAATACCAGTGGCGAAGGCGGCCCCCTGGACAAGACTGACGCTCAGGTGCGAAAGCGTG  
GGGAG

>ASV:2300:Genus:Parabacteroides

TACGGAGGATCCGAGCGTTATCCGGATTTATTGGGTTTAAAGGGTGCCTAGGCGGCTTTTAAAGTCAGCGGTGAAAGTCT  
GTGGCTCAACCATAGAATTGCCGTTGAAACTGGGGGGCTTGTAGTATGTTTGTAGGCGAGGCGGAATGCGTGGTGTAGCGGTG  
AAATGCTTAGATATCACGAAGAACCAGTGGCGAAGGCGGCTTACTGGACGATAACTGACGTTGATGCTCGAAAGTGTG  
GGTAT

>ASV:2301:Genus:Alistipes

TACGGAGGATCAAGCGTTATCCGGATTTATTGGGTTTAAAGGGTGCCTAGGCGGTTTTGATAAGTTAGAGGTGAAATTT  
GGGGCTCAACCTGAACCTGCTCTAATACTGTTGAGCTAGAGAGTAGTTGCGGTAGGCGGAATGTATGGTGTAGCGGTG  
AAATGCGTAGATATTAGGAGGAACACCAGTGGCGAAGGCGGTTTGTGGCCATTACTGACGCTGAGGAACGAAAGCGTG  
GGGAG

>ASV:2302:Genus:Dorea

TACGTAGGGGGCAAGCGTTATCCGGATTTACTGGGTGTAAAGGGAGCGTAGACGGCACGGCAAGTCAGATGTGAAAACCC  
GGGGCTCAACCCCGGACTGCATTTGAAACTGCTGAGCTAGAGTGTGCGGAGAGGCAAGTGAATTCCTAGTGTAGCGGTG  
AAATGCGTAGATATTAGGAGGAACACCAGTGGCGAAGGCGGCTTGTGGACGGTGACTGACGTTGAGGCTCGAAAGCGTG  
GGGAG

>ASV:2303:Family:Ruminococcaceae

TACGTAGGTGGCAAGCGTTGTCCGGAACTACTGGGTGTAAAGGGAGCATAGGTGGGATGCCAAGTCAGCTGTGAAAACCTA  
TGGGCTTAACCTGTAGACTGCAGTTGAAAACCTGGTATTCTTGTAGTGAAGTAGAGGTTGGCGGAATTCAGGTGTAGCGGTG  
AAATGCGTAGATATTAGGAGGAACACCAGTGGCGAAGGCGGCCAACTGGGCTTAACTGACGCTGAGGCTCGAAAGTGTG

GGGAG

>ASV:2304:Genus:Marvinbryantia

TACGTAGGGGCGAGCGTTATCCGGATTTACTGGGTGTAAGAGAGCGTAGACGGCGTATCAAGTCTGATGTGAAAGGCA  
GGGGCTTAACCCCTGACTGCATTTGAAACTGGTATGCTTGTAGTGCCGGAGGGTAAGCGGAATTCCTAGTGTAGCGGTG  
AAATGCGTAGATATTAGGAGGAACACCAGTGGCGAAGGCGGTTACTGGACGGTAACGACGTTGAGGCTCGAAAGCGTG  
GGGAG

>ASV:2305:Genus:Ruminococcaceae\_UCG-005

TACGTAGGTTGCAAGCGTTGTCCGGATTACTGGGTGTAAGGGGCGTAGGCGGAGCTGCAAGTCAAGTGTGAAATCCC  
GGGGCTCAACCCCGAAGTGCATTTGAAACTGTAGCCCTTGTAGTATCGGAGAGGCAAGTGAATTCCTAGTGTAGCGGTG  
AAATGCGTAGATATTAGGAGGAACACCAGTGGCGAAGGCGGTTGCTGGACGACAACGACGCTGAGGCGCAAAGCGTG  
GGGAG

>ASV:2306:Genus:Agathobacter

TACGTATGGTGCAAGCGTTATCCGGATTTACTGGGTGTAAGGGAGCGCAGGCGGTGCGGCAAGTCTGATGTGAAAGGCC  
AGGGCTCAACCCCGTACTGCATTTGAAACTGTCTACTAGAGTGTGCGAGGGGTAAGCGGAATTCCTAGTGTAGCGGTG  
AAATGCGTAGATATTAGGAGGAATACCAGTGGCGAAGGCGGTTACTGGACGATAACGACGCTGAGGCTCGAAAGCGTG  
GGGAG

>ASV:2307:Genus:Bifidobacterium

TACGTAGGGAGCAAGCGTTATCCGGATTACTGGGCTAAAGGGCTCGTAGGCGGTTCTGTCGCTCCGGTGTGAAAGTCC  
ATCGCTTAACGGTGGATCCGCGCCGGGTACGGGCGGCTTGTAGTGTGCGGAGGGGACTGGAATTCCTAGTGTAGCGGTG  
GAATGTGTAGATATCGGAAGAACACCAGTGGCGAAGGCGGTTACTGGACGATGACGACGTTGAGGCTCGAAAGCGTG  
GGGAG

>ASV:2308:Genus:Subdoligranulum

AACGTAGGGTGCAAGCGTTGTCCGGATTACTGGGTGTAAGGGAGCGCAGGCGGGAAGACAAGTTGGAAGTAAAACCA  
TGGGCTCAACCCATGAATGCTTTCAAACCTGTTTTCTTGTAGTGTGAGAGGTAGATGGAATTCCTAGTGTAGCGGTG  
GAATGTGTAGATATCGGGAGGAACACCAGTGGCGAAGGCGGTTACTGGGACCAACGACGCTGAGGCTCGAAAGCATG  
GGTAG

>ASV:2309:Genus:Ruminococcaceae\_UCG-002

TACGTAGGTGGCAAGCGTTGTCCGGATTACTGGGTGTAAGGGGCGTAGGCGGGAATGCAAGTCAAGTGTGAAATCCA  
TGGGCTTAACCCATGAAGTGCATTTGAAACTGATTTCTTGTAGTGTGAGAGGCAATCGGAATTCCTAGTGTAGCGGTG  
AAATGCGTAGATATTAGGAGGAACACCAGTGGCGAAGGCGGATTGCTGGACAGCAACGACGCTGAGGCGCAAAGTGTG  
GGGAG

>ASV:2310:Species:mobilis

TACGTAGGTGGCAGCGTTGTCCGGATTACTGGGCTAAAGAGCATGTAGGTGGGAATGTAAGTCTGTTGTTAAAATGC  
GGGGCTCAACCCGATTGCACTGGAACTACATTTCTTGTAGTGTGAGAGAGGAAAGGGGAATTCCTAGTGTAGCGGTG  
AATGCGTAGATATTGGGAGGAACACCAGTGGCGAAGGCGCTTTCTGACTGTGTCTGACACTGAGATGCGAAAGCTAGG  
GGAGC

>ASV:2311:Species:glaucum

TACGTAGGGTGCGAGCGTTGTCCGGATTACTGGGCTAAAGAGCTCGTAGGTGTTTGTGCGCTCGTTTGTGGAATACC  
GGGGCTTAACCTCGGGTGCATACGATACGGGCATAACTTGTAGTGTGAGGGGAGACTGGAATTCCTGGTGTAGCGGT  
GAAATGCGCAGATATCAGGAGGAACACCAGTGGCGAAGGCGAGTCTCTGGGCAAGTACTGACGCTGAGGAGCGAAAGCAT  
GGGGA

>ASV:2312:Genus:Prevotella\_6

TACGGAAGGTCCGGGCTTATCCGGATTTACTGGGTTAAAGGGAGCGTAGGCGGTTTTAAGCGTGTGTGAAATGTA  
GGCGCCAACGTCTGCATCGCAGCGCAACTGGAACGTTGTAGTGTGAGGAGGCAAGTGGCGGAATTCCTCGTGTAGCGGTG  
AAATGCTTAGATATGACGAAGAACCTCCGATTGCGAAGGCGAGTGTACGGGAGCGGCACTGACGCTTAAGCTCGAAGGTGCG  
GGTAT

>ASV:2313:Genus:Ralstonia

TACGTAGGGTCAAGCGTTAATCCGAATTTACTGGGCTAAAGCGTGCAGCGGGCGGTTGTGCAAGACCGATGTGAAATCCC  
CGAGCTTAACCTGGGAATGCAATGGTACTGCACGGCTAGAGTGTGTGAGAGGGGGTAGAATTCACGCTGTAGCAGTG  
AAATGCGTAGAGATGTGGAGGAATACCAGTGGCGAAGGCGAGTCCCTGGGATAACACTGACGCTCATGCACGAAAGCGTG  
GGGAG

>ASV:2314:Family:Ruminococcaceae

TACGTAGGGAGCAAGCGTTGTCCGGATTTACTGGGTGTAAGGGTGCAGGCGGCTTTCAAGTCAAGTGTGAAACCC  
GGGGCTTAACCCCGGCTGCATTTGAAACTGTAGGCTTGTAGTGTGAGAGGTAAGCGGAATTCCTAGTGTAGCGGTG  
AAATGCGTAGATATTAGGAGGAACACCAGTGGCGAAGGCGGTTACTGGACATTAACGACGCTGAGGCGCAAAGCGTG  
GGGAG

>ASV:2315:Species:sinus

TACGTAGGGGGCAAGCGTTATCCGGATTTACTGGGTGTAAGGGAGCGTAGACGGAATGGCAAGTCTGAAGTGAATACC  
CGGGCTCAACCTGGGAAGTGCATTTGAAACTGTTGTTCTAGAGTGTGGAGAGGTAAGTGAATTCCTGGTGTAGCGGTG  
AAATGCGTAGATATCAGGAAGAACACCAGGAGGCGAAGGCGGTTACTGGACAATAACTGACGTTGAGGCTCGAAAGCGTG  
GGGAT

>ASV:2316:Genus:Akkermansia

TACAGAGGTCTCAAGCGTTGTCCGAATCACTGGGCTAAAGCGTGCAGGCGGTTTCTGTAAGTCTGTGTGAAAGGCG  
GAGGCTCAACCCCGACTGCATGATACTGCGAGACTAGAGTAATGGAGGGGAAACCGGAATTCCTGGTGTAGCAGTG  
AAATGCGTAGATATCAGAGGAACACTCGTGGCGAAGGCGGTTCTGGACATTAACGACGCTGAGGCGCAAAGGCGAG  
GGGAG

>ASV:2317:Species:dentirosetti/downei/sobrinus

TACGTAGGTCCCGAGCGTTGTCCGGATTTACTGGGCTAAAGGGAGCGCAGGCGTTTTAGTAAGTCTGAAGTAAAGGCA

TTGGCTCAACCAATGTATGCTTTGAAACTGTTAGACTTGAGTGCAGAAGGGGAGAGTGAATTCCATGTGTAGCGGTGA  
AATGCGTAGATATATGGAGGAACACCGGTGGCGAAAGCGGCTCTCTGGTCTGTCACTGACGCTGAGGCTCGAAAGCGTG  
GTAGC  
>ASV:2318:Order:Clostridiales  
TACGTAGGGAGCAAGCGTTGTCCGAATTACTGGGCGTAAAGGGCGGTAGGCGGCCTGTAAGTTGTATGTGAAATACC  
CGGGCTTAACCTGGGGGTGCATACAAAAGTGTGGTCTTGTAGTGCAGTACAGGAGGAAAGTGAATTCCCTAGTGTAGCGGTG  
AAATGCGTAGATATTAGGAGGAACACCAGTGGCGAAGGCGACTTTCTGGCCGTAACGACGCTGAGGCGCGAAAGCGTG  
GGGAG  
>ASV:2319:Genus:Bacteroides  
TACGGAGGATCCGAGCGTTATCCGGATTTATTGGGTTAAAGGGAGCGTAGGTGGATTGTTAAGTCAGTTGTGAAAGTTT  
GCGGCTCAACCGTAAAATTGCAGTTGATACTGGCTGTCTTGTAGTACAGTACAGGAGGCGGAAATTCGTGGTGTAGCGGTG  
AAATGCGTAGATATACGGAGGAACACCAGTGGCGAAGGCGGCTGCTGGACATTAACGACGCTGAGGCGCGAAAGCGTG  
GGGAG  
>ASV:2320:Genus:Ruminiclostridium\_9  
TACGTAGGTGGCAAGCGTTATCCGGATTTACTGGGTGTAAGGGCGGTAGGCGGGATTGCAAGTCAGATGTGAAAACCA  
GGGGCTCAACCTCTGGCCTGCATTTGAAACTGTAGTTCTTGTAGTACTGGAGAGGCGAGACGGAATTCCTAGTGTAGCGGTG  
AAATGCGTAGATATTAGGAGGAACACCAGTGGCGAAGGCGGCTGCTGGACAGCAACTGACGCTGAGGCGCGAAAGCGTG  
GGGAG  
>ASV:2321:Family:Clostridiales\_vadinBB60\_group  
TACGTAGGATCAAGCGTTATCCGGAAATGACTGGGCGTAAAGGGTGCCTAGGTGGTTTGTCAAGTTGGCAGCGTAATTC  
GTGGCTTAACCGCGAACTACTGCCAAAAGTGTAGGCTTGTAGTGCAGGAGGGTATGTGGAATTCCTAGTGTAGCGGTG  
GAATGCGTAGATATTAGGAGGAACACCGGTGGCGAAGGCGACATACTGGGCCGTAACGACACTGAAGCACGAAAGCGTG  
GGGAG  
>ASV:2322:Family:Ruminococcaceae  
TACGTAGGTGGCAAGCGTTATCCGGATTTACTGGGTGTAAGGGCGGTAGGCGGGAAAGCAAGTCAGGCGTGAAAACCA  
GGGGCTCAACCCCTGGCCTGCGTTTGAAGTGTCTTGTAGTGTGCGAGAGGTAATCGGAATTCCTGTGTAGCGGTG  
AAATGCGTAGATATACGGAGGAACACCAGTGGCGAAGGCGGATTACTGGACGATAACTGACGCTGAGGCGCGAAAGCGTG  
GGGAG  
>ASV:2323:Genus:Alistipes  
TACGGAGGATCCGAGCGTTATCCGGATTTATTGGGTTAAAGGGTGCCTAGGCGGTTTGATAAGTTAGAGGTGAAATTC  
GGGGCTCAACCTGAACGTGCCTCTAATACTGTTGAGCTAGAGAGTGTGCGGTAGGCGGAATGTATGGTGTAGCGGTG  
AAATGCGTAGATATTAGGAGGAACACCAGTGGCGAAGGCGGCTACTGGCTGTAACGACGCTGAGGAGCGAAAGCGTG  
GGGAG  
>ASV:2324:Kingdom:Bacteria  
TACGGAGGATCCAAGCGTTATCCGGATTTATTGGGTTAAAGGGAGCGTAGATGGATGTTTAAAGTCAGTTGTGAAAGTTT  
GCGGCTCAACCGTAAAATTGCAGCTGATACTGGCGACCTTGTAGTGAACAGAGGTAGGCGGAATTCCTAGTGTAGCGGTG  
AAATGCGTAGATATTAGGAGGAACACCAGTGGCGAAGGCGGCTTACTGGACGGTAACGACGTTGAGGCTCGAAAGCGTG  
GGGAG  
>ASV:2325:Family:Enterobacteriaceae  
TACGGAGGGTCAAGCGTTAATCCGGAATTACTGGGCGTAAAGCGCACGCAGGCGGTCTGTCAAGTCGGATGTGAAATCCC  
CGGGCTCAACCTGGAACTGCATTGAAACTGGCAGGCTTGTAGTCTTGTAGAGGGGGTGAATTCAGGTGTAGCGGTG  
AAGTGCCTAGAGATCTGGAGGAATACCGGTGGCGAAGGCGGCCCCCTGGACAAGACTGACGCTCAGGTGCGAAAGCGTG  
GGGAG  
>ASV:2326:Genus:Parabacteroides  
TACGGAGGATCCGAGCGTTATCCGGATTTATTGGGTTAAAGGGTGCCTAGGCGGCCTTTTAAAGTCAGCGGTGAAAGTCT  
GTGGCTCAACCATAGAATTGCCGTTGAAACTGGGAGGCTTGTAGTATGTTTGAAGCAGGCGGAATGCGTGGTGTAGCGGTG  
AAATGCTTAGATATCACGAGAACCCGATTGCGAAGGCGAGCTGCTAAGCTGCAACTGACATTGAGGCTCGAAAGTGTG  
GGTAT  
>ASV:2327:Species:longum  
TACGTAGGGTCAAGCGTTATCCGGAATTATTGGGCGTAAAGGGCTCGTAGGCGGTTCTGTCGCGTCCGGTGTGAAAGTCC  
ATCGCTTAACGGTGGATTCCGCGCGGGTACGGGCGGGCTTGTAGTGCAGTGGGAGACTGGAATTCCTGGTGTAAACGGTG  
GAATGTGTAGATATCGGGAAGAACAACCAATGGCGAAGGCGAGTCTCTGGGCCGTTACTGACGCTGAGGAGCGAAAGCGTG  
GGGAG  
>ASV:2328:Family:Enterobacteriaceae  
TACGGAGGGTCAAGCGTTAATCCGGAATTACTGGGCGTAAAGCGCACGCAGGCGGTCTGTCAAGTCGGATGTGAAATCCC  
CGGGCTCAACCTGGAACTGCATTGAAACTGGCAGGCTAGAGTCTTGTAGAGGGGGTGAATTCCTAGTGTAGCGGTG  
AAATGCGTAGAGATCTGGAGGAATACCGGTGGCGAAGGCGGCCCCCTGGACAAGACTGACGCTCAGGTGCGAAAGCGTG  
GGGAG  
>ASV:2329:Family:Lachnospiraceae  
TACGTAGGGGGCAATCGTTATCCGGATTTACTGGGTGTAAGGGAGCGTAGACGGCATGGCAAGCCAGATGTGAAAGCCC  
GGGGCTCAACCCGGACTGCATTTGAACTGTACGCTAGAGTGTGCGAGAGGAAAGCGGAATTCCTAGTGTAGCGGTG  
AAATGCGTAGATATTAGGAGGAACACCAGTGGCGAAGGCGGCTTTCTGGACGATGACTGACGTTGAGGCTCGAAAGCGTG  
GGGAG  
>ASV:2330:Genus:Allorhizobium-Neorhizobium-Pararhizobium-Rhizobium  
TACGAAGGGGGCTAGCGTTGTTCCGGAATTACTGGGCGTAAAGCGCACGTAGGCGGATATTTAAGTCAGGGGTGAAATCCC  
GCAGCTCAACTGCGGAACTGCATTTGATACTGGGTATCTTGTAGTATGGAAGAGGTAAGTGAATTCCTAGTGTAGAGGTG  
AAATGCGTAGATATTAGGAGGAACACCAGTGGCGAAGGCGGCTTACTGGTCCATTACTGACGCTGAGGTGCGAAAGCGTG  
GGGAG

>ASV:2331:Species:alimentarium/conglomeratum/faecium/massiliense/paraconglomeratum/sacelli  
TACGTAGGGCCGCAAGCGTTGTCCGGAATTATTGGGCGTAAAGAGCTTGTAGGTGGCTTGTCCGCTGCCGTGAAAACCC  
GAGGCTCAACCTCGGGCTGCGGTGGGTACGGGCAGGCTAGAGTGTGGTAGGGGAGACTGGAACCTCTGGTGTAGCGGTG  
AAATGCGCAGATATCAGGAAGAACCACCGATGGCGAAGGCAGGTCTCTGGGCCATTACTGACACTGAGAAGCGAAAGCATG  
GGTAG

>ASV:2332:Genus:Christensenella  
TACGTAGGGAGCAAGCGTTGTCCGGAATTACTGGGCGTAAAGGGTGCCTAGGTGGTCATGTAAGTCAGATGTGAAAGACC  
GGGGCTCAACCCCGGGACTGCATTGGAACTGCTGACTTGTAGTACAGGAGAGGGAAGTGAATTCCTAGTGTAGCGGTG  
AAATGCGTAGATATTAGGAGGAACACCAGTTGCGAAGGCAGCTTTCTGGACTGTAAGTACACTGAGGCACGAAAGCGTG  
GGGAG

>ASV:2333:Genus:Christensenellaceae\_R-7\_group  
TACGTAGGGGGCGAGCGTTGTCCGGAATGACTGGGCGTAAAGGGCGCGTAAAGTCTGGAGTGAAAGTCC  
TGCTTTCAAGGTGGGAATTGCTTTGGAGACTGGTTGGCTTGTAGTGCAGGAGAGGTAAGTGAATTCCTAGTGTAGCGGTG  
AAATGCGTAGATATTGGGAGGAACACCAGTGGCGAAGGCAGCTTACTGGCCGTAAGTACGCTGAGGCAGGCGAAAGCGTG  
GGGAG

>ASV:2334:Genus:Shuttleworthia  
TACGTATGGAGCAAGCGTTATCCGGATTTACTGGGTGTAAGGGAGCGTAGGCGGTGGTGAAGTCTGATGTGAAAACCC  
GGGGCTCAACCCCGGGACTGCATTGGAACTGCGTCACTTGTAGTGTGCGAGGGTAAGTGAATTCCTAGTGTAGCGGTG  
AAATGCGTAGATATTAGGAGGAACACCAGTGGCGAAGGCAGCTTACTGGACGACAAGTACGCTGAGGCTCGAAAGCGTG  
GGGAG

>ASV:2335:Family:Ruminococcaceae  
TACGTAGGTGGCAAGCGTTGTCCGGAATTTACTGGGTGTAAGGGAGCGTAGGCGGGCGGCAAGCAAAATGTGAAACTGA  
TCGGCTCAACCCGGTATTGCGTTTTGAACTGTCGCTCTTGTAGTGGAGTAGAGGCAGGCGGAATTCCTAGTGTAGCGGTG  
AATGCGTAGATATTAGGAGGAACACCAGTGGCGAAGGCAGCTTACTGGGCTTTTACTGACGCTGAGGCTCGAAAGTGTGG  
GTAGC

>ASV:2336:Genus:Sanguibacteroides  
CACGGGGATGCGAGCGTTATCCGGATTTACTGGGTGTAAGGGAGCGTAGGCGGCCGACAAGTCAGCGGTAAAAGACT  
GACGCTAAACTGTAGCAGCGCTTGAAGTGCAGGCTGAGTGCAGACGAGGTTGGCGGAACAGGTGAAGTGTAGCGGTG  
AATGCATAGATATCACCTGGAACCCGACAGCGAAGGCAGCTGACCAGGCTGTAAGTACGCTGATGCTCGAGAGCGTGG  
GTAGC

>ASV:2337:Genus:Prevotella\_7  
TACGGAAGGTCCGGCGTTATCCGGATTTATTGGGTTTAAAGGGAGCGCAGGCCGCCGGCAAGCGTGTGTGAAATGCA  
GTCGCTCAACGCTGTGACTGCAGCGGAACTGCCAGCTTGTAGTGCAGCGCAACGTTGGCGGAATTCGCCGTGTAGCGGTG  
AAATGCGTAGATATTAGGAGGAATACCAGTGGCGAAGGCAGCTTTCTGGACGAAAAGTACGCTGAGGCGGAAAGCGTG  
GGGAG

>ASV:2338:Family:Lachnospiraceae  
TACGTAGGGGGCAAGCGTTATCCGGATTTACTGGGTGTAAGGGAGCGTAGGTGGCGATGCAAGCCAGAAGTAAAACCC  
GGGGCTCAACCCCGTGGACTGCTTTTGAAGTGTGTTGCTGGAGTGCAGGAGAGGTAAGTGAATTCCTAGTGTAGCGGT  
GAAATGCGTAGATATTAGGAGGAACACCAGTGGCGAAGGCAGCTTACTGGACTGTAAGTACACTGAGGCTCGAAAGCGT  
GGGGA

>ASV:2339:Species:buccae  
TACGGAAGGTCCGGCGTTATCCGGATTTATTGGGTTTAAAGGGAGCGCAGGCCGCCGTGCAAGCGTCCGTGAAAAGCA  
GCGGCCCAACCGCTGCCCTGCGGCGCAACTGCTTGGCTTGTAGTGCAGCGGAAAGCGGCGGAATTCGTGGTGTAGCGGTG  
AAATGCTTAGATATCACGAAGAACCCGATTGCGAAGGCAGCCGCTGTGGCCCACTGACGCTGAGGCTCGAAAGTGGC  
GGTAT

>ASV:2340:Order:Bacteroidales  
TACGGAGGATCCGAGCGTTATCCGGATTTATTGGGTTTAAAGGGAGCGTAGGTGGACAGTAAAGTCAAGTGTGAAAGTTT  
GCGGCTCAACCGTAAAATTGCAAGTGAAGTGGCAGTCTTGTAGTACAGTAGAGGTGGCGGGAATTCCTAGTGTAGCGGTG  
AAATGCGTAGATATTAGGAGGAACATCAGTGGCGAAGGCAGCTTACTGGACTGAAAAGTACACTGAGGCACGAAAGCGTG  
GGGAG

>ASV:2341:Genus:Mitsuokella  
TACGTAGGTGGCGAGCGTTGTCCGGAATTATTGGGCGTAAAGGGAGCGCAGGCGGGAGGTCAAGTCTATCTTAAAAGTGC  
GGAGCTCAACCCCGTGGAGGATAGAACTGGTCTTCTTGTAGTGCAGGAGAGGAAAGCGGAATTCCTAGTGTAGCGGTG  
AATGCGTAGATATTAGGAGGAACACCAGTGGCGAAGGCAGCTTCTGGACTGTAAGTACACTGAGGCTCGAAAGCGTGG  
GGAGC

>ASV:2342:Order:Coriobacteriales  
TACGTAGGGAGCGAGCGTTATCCGGATTTACTGGGCGTAAAGGGAGCGTAGGCGGCCGCTAAGTCCGGAGTCAAAGCCC  
GGGGCTCAACCCCGGCCGCTCCGAAACTGGCCGGCTTGTAGTGTGCGAGGGAAGGCAGGAAATTCCTAGTGTAGCGGTG  
AATGCGCAGATATTGGGAAGAACCAGTGGCGAAGGCAGCTTCTGGCCACGACTGACGCTGAGGCGGAAAGTGGG  
GGAGC

>ASV:2343:Genus:Coprococcus\_3  
TACGTATGGTCAAGCGTTATCCGGATTTACTGGGTGTAAGGGAGCGTAGACGGCTGTGTAAGTCTGGAGTAAAAGCCC  
GGGGCTCAACCCCGGGACTGCTTTGAAACTATGCAGCTAGAGTGTGCGAGAGGTAAGTGAATTCCTAGTGTAGCGGTG  
AAATGCGTAGATATTGGGAGGAACACCAGTGGCGAAGGCAGCTTACTGGACGATGACTGACGTTGATGCTCGAAAGCGTG  
GGGAG

>ASV:2344:Order:Mollicutes\_RF39  
TACGTAGGGAGCGAGCGTTATCCGGATTTATTGGGTGTAAGCGTGTGTAAGGCGTTTGTAAAGTCTAAGGTTTAAAGCCC  
GGAGCTCAACTCCGGATCGCTTAGAAACTGTGCAACTTGTAGTATGGTAGAGGCAAGTGAATTCCTAGTGTAGCGGTG

AATGCGTAGATATTAGAAGGAACACCAGTGGCGAAGGCGACTTGCTGGGCCAAAACCTGACGCTGAGACACGAAAGCGTGG  
GGAGC  
>ASV:2345:Family:Lachnospiraceae  
TACGTATGGAGCAAGCGTTATCCGGATTTACTGGGTGTAAAGGGTGCCTAGGTAGCAGTGCAAGTCAGATGTGAAAGGCC  
GGGGCTCAACCCCGGAGCTGCATTTGAAACTGCATAGCTAGAGTACAGGAGAGGCAGCGGAATTCCTAGTGTAGCGGTG  
AAATGCGTAGATATTAGGAGGAACACCAGTGGCGAAGGCGGCTTCTGGACTGTTACTGACACTGAGGCACGAAAGCGTG  
GGGAG  
>ASV:2346:Genus:Coprococcus\_1  
TACGTAGGGGGCAAGCGTTATCCGGATTTACTGGGTGTAAAGGGAGCGTAGGCGGGGAGCAAGTCAGAAGTAAAAGCCC  
GGGGCTCAACCCCGGACGGCTTTTGAAGTGTCTGCTTATTTCAGGAGAGGTAAGCGGAATTCCTAGTGTAGCGGTG  
AAATGCGTAGATATTAGGAGGAACACCAGTGGCGAAGGCGGCTTACTGGACTGACAATGACGCTGAGGCTCGAAAGCGTG  
GGGAG  
>ASV:2347:Family:Lachnospiraceae  
TACGTATGGGGCAAGCGTTATCCGGATTTACTGGGTGTAGAGGGAGCGTAGGCGGCATGGCAAGTCAGAAGTAAAAGCCT  
GGGGCTCAACCCCGGAATTGCTTTGAAACTGTCAGGCTAGAGTGTGCGAGGGGTAAGCGGAATTCCTAGTGTAGCGGTG  
AAATGCGTAGATATTAGGAGGAACACCAGTGGCGAAGGCGGCTTACTGGACGATTACTGACGCTGAGGCTCGAAAGCGTG  
GGGAG  
>ASV:2348:Genus:Candidatus\_Soleaferrea  
TACGTAGGTGGCAAGCGTTGTCCGGAATTACTGGGTGTAAAGGGAGCGTAGGCGGGAAGTCAAGTTGAATGTGAAATCGA  
TCGGCTCAACCGGTGCTGCGTTCAAAGTATTTTCTTGTAGTGAAGTAGAGGCAAGCGGAATTCCTAGTGTAGCGGTGA  
AATGCGTAGATATTAGGAGGAACACCAGTGGCGAAGGCGGCTTCTGGCTTTAACTGACGCTGAGGCTCGAAAGTGTGG  
GTAGC  
>ASV:2349:Genus:Agathobacter  
TACGTATGGTGAAGCGTTATCCGGATTTACTGGGTGTAAAGGGAGCGCAGGCGGTGCGGCAAGTCTGATGTGAAAGCCC  
GGGGCTCAACCCCGGTACTGCATTGAAACTGTCGACTAGAGTGTGCGAGGGGTAAGCGGAATTCCTAGTGTAGCGGTG  
AAATGCGTAGATATTAGGAGGAACACCAGCGGCGAAGGCGGCTTCTGGACTGTAACGACACTGAGGCTCGAAAGCGTG  
GGGAG  
>ASV:2350:Species:aureus  
TACGTAGGTGGCAAGCGTTATCCGGAATTATTGGGCGTAAAGCGCGCTAGGCGGTTTTTAAAGTCTGATGTGAAAGTCC  
ACGGCTCAACCGTGGAGGGTCAATTGAAACTGAAAACCTTGTAGTGCAGAAGAGGAAAGTGAATTCATGTGTAGCGGTG  
AAATGCGCAGAGATATTGGAGGAACACCAGTGGCGAAGGCGACTTCTGGTCTGTAACGACGCTGATGTGCGAAAGCGTG  
GGGAT  
>ASV:2351:Species:urolithinfaciens  
TACGTAGGGGGCAGCGTTATCCGGATTCATTGGGCGTAAAGCGCGCTAGGCGGGCTTCTAAGCGGAACCTCTAACCCG  
AGGGCTCAACCCCGGCGGGTTCCGAACTGGAAGCTCAGTCTGCTAGAGGAAAGTGAATTCCTAGTGTAGCGGTGG  
AATGCGCAGATATTGGGAAGAACACCAGTGGCGAAGGCGACTTCTGGGCGCGACTGACGCTGAGGCGGAAAGCTGGG  
GGAGC  
>ASV:2352:Genus:Ruminococcaceae\_UCG-010  
TACGTAGGTGGCAGCGTTATCCGGAATTACTGGGTGTAAAGGGTGTAGGCGGGAGAGCAAGTCAGGTGTGAAATGCA  
GGGGCTTAACCCCTGAACTGCATTGAAACTGTTCTTCTTGTAGAGTGGAGGGGTAATCGGAATTCCTAGTGTAGCGGTG  
AAATGCGCAGAGATTGGGAGGAACACCAGTGGCGAAGGCGGATTACTGGACGACAACGACGCTGATACACGAAAGCGTG  
GGGAG  
>ASV:2353:Family:Erysipelotrichaceae  
TACGTAGGTGGCAAGCGTTATCCGGAATGATTGGGCGTAAAGGGTGCAGGCGGCGTCTAAGTCTGAAGTAAAAGGCA  
TCGGCTCAACCGATGCAAGCTTTGAAACTGGCATGCTGGAGTGCAGGAGAGGGCGATGGAATTCATGTGTAGCGGTAA  
AATGCGTAGATATTAGGAGGAACACCAGTGGCGAAGGCGGCTGCCTGGCTGCAACTGACGCTGAGGCACGAAAGCGTG  
GGAGC  
>ASV:2354:Genus:Ruminococcus\_2  
TACGTAGGGAGCAAGCGTTGTCCGGATTTACTGGGTGTAAAGGGTGCCTAGGCGGCTTTCGCAAGTCAGATGTGAAATCTA  
TGGGCTCAACCCATAAACTGCATTTGAAACTGTAGAGCTTGTAGTGAAGTAGAGGCAGGCGGAATTCCTAGTGTAGCGGTG  
AAATGCGTAGAGATGGGAGGAACACCAGTGGCGAAGGCGGCTTCTGGCTTTAACTGACGCTGAGACACGAAAGCGTG  
GGTAG  
>ASV:2355:Genus:Coprococcus\_3  
TACGTATGGTGAAGCGTTATCCGGATTTACTGGGTGTAAAGGGAGCGTAGACGGAGGGCAAGTCTGAAGTAAAAGCCC  
GGGGCCCAACCCCGGACTGCTTTGAAACTGTCGCTGAGTGCAGGAGAGGTAAGCGGAATTCCTAGTGTAGCGGTG  
AAATGCGTAGATATTGGGAGGAACACCAGTGGCGAAGGCGGCTTACTGGACGGTCACTGACGCTTGGGCTCGAAAGCGTG  
GGGAG  
>ASV:2356:Genus:Bacteroides  
TACGGAGGATCCGAGCGTTATCCGGATTTAATGGGTTAAAGGGAGCGTAGGCGGGTGTAAAGTCAAGTGTGAAAGTTT  
GCGGCTCAACCGTAAAATTGCAGTTGATACTGGCGACCTTGTAGTGAACAGAGGTAGGCGGAATTCGTGGTGTAGCGGTG  
AAATGCGTAGATATTAGGAGGAACACCAGTGGCGAAGGCGGCTTCTGGTCTGTAACGACGCTGAGGCTCGAAAGCGTG  
GGGAG  
>ASV:2357:Order:Bacteroidales  
TACGGAGGATCCGAGCGTTATCCGGATTTATTGGGTTAAAGGGAGCGTAGGTTGGATTGTTAAGTCAAGTGTGAAAGTTT  
GCGGCTCAACCGTAAAATTGCAGTTGAAACTGGCAGTCTTGTAGTACAGTAGAGGTGGGCGGAATGTATGGTGTAGCGGTG  
AAATGCGTAGATATTAGGAGGAACACCAGTGGCGAAGGCGGCTTACTGGACGGTAACTGACGCTTGGGCTCGAAAGCGTG  
GGGAG  
>ASV:2358:Genus:Paraprevotella

TACGGAAGATGCGAGCGTTATCCGGATTTATTGGGTTAAAGGGAGCGTAGGCGGGCTTTAAGTCAGCGGTCAAATGTC  
ACGGCTCAACCGTGGCCAGCCGTTGAAACTGTAAGCCTTGAGTCTGCACAGGGCACATGGAATTCGTGGTGTAGCGGTGA  
AATGCTTAGATATACGAAGAAGTCCGATCGCGAAGGCATTGTGCCGGGCATAACTGACGCTGAGGCTCGAAAGTCCGG  
GTATC

>ASV:2359:Genus:Kocuria

TACGTAGGGGCAAGCGTTGTCCGGAATTATTGGGCGTAAAGAGCTCGTAGGCGGTTTGTCCGCTCTGCTGTGAAAGCCC  
GGGGCTTAACCCCGTGGTGTGCAGTGGGTACGGGCAGACTAGAGTGCAGTAGGGGAGACTGTAATTCCTGGTGTAGCGGT  
GAAATGCGCAGATATCAGGAGGAACACCGATGGCGAAGGCAGTCTCTGGGCTGTTACTGACGCTGAGGAGCGAAAGCAT  
GGGA

>ASV:2360:Genus:Tepidimonas

TACGTAGGGTGCAGCGTTAATCCGAATTACTGGGCGTAAAGCGTGCAGGCGGTTCTGTAAGACAGAGGTGAAATCCC  
TGGGCTCAACCTAGGAATGGCCTTTGTGACTGCAAGGCTGGAGTGCAGGAGGGGATGGAATTCGCGTGTAGCAGTG  
AATGCGTAGATATCGGAGGAACACCGATGGCGAAGGCAGTCCCCTGGGCTGCACTGACGCTCATGCACGAAAGCGTG  
GGAG

>ASV:2361:Family:Lachnospiraceae

TACGTAGGGGCAAGCGTTATCCGGATTTACTGGGTGTAAGGGAGCGTAGGTGGCAAGGCAAGTCAGATGTGAAAACCC  
GGGGCTCAACCCGGGACTGCATTTGAAACTGTCTAGCTAGAGTGCAGGAGAGGTAAGTGAATTCCTAGTGTACCGGTG  
AATGCGTAGATATTAGGAGGAACACCGATGGCGAAGGCAGTCCCCTGGGCTGCACTGACGCTCATGCACGAAAGCGTG  
GGAG

>ASV:2362:Genus:Ruminiclostridium\_5

TACGTAGGGGCAAGCGTTGTCCGGATTTACTGGGTGTAAGGGTGCAGGCGGCTAGGCAAGTCAGAGCTGAAAACCA  
TGGGCTCAACCTGTGGACTGCGTTTGAAGTGTAGCTTAGAGTGAAGTATAGGTAGGCGGAATTCGCGTGTAGCGGTG  
AATGCGTAGATATCGGAGGAACACCGATGGCGAAGGCAGTCCCCTGGGCTTAACTGACGCTGAGGCACGAAAGCATG  
GGTAG

>ASV:2363:Genus:Bilophila

TACGGAGGGTCAAGCGTTAATCGGAATCACTGGGCGTAAAGCGCACGTAGGCGGTTTGTAAAGTCAGGGGTGAAATCCC  
ACAGCCCAACTGTGGAAGTGCCTTTGATACTGGCAGACTTGAAGTACCAGGAGAGGGTGGCGGAATTCAGGTGTAGGAGTG  
AATCCGTAGATATCTGGAGGAACACCGGTGGCGAAGGCAGCCACCTGGACGTTAACTGACGCTGAGGTGCGAAAGCGTG  
GGTAG

>ASV:2364:Species:gravenitzi

TACGTAGGGGCAAGCGTTGTCCGGATTTATTGGGCGTAAAGAGCTCGTAGGCGGCTGGTCCGCTCTGTGTAAGTCTG  
CCGGCTCAACCGGGGCTTGGGTTGGTACGGGCGGCTAGAGTGCAGGAGGGTAACTGGAATTCCTGGTGTAGCGGTG  
GAATGCGCAGATATCAGGAAGAACACCGATGGCGAAGGCAGTCTTACTGGGCTTAACTGACGCTGAGGAGCGAAAGCGTG  
GGAG

>ASV:2365:Species:alimentarius/allis/aquaticus/faecalis/frigidicola/glacincola/luti/namhaensis

TACAGAGGGTCAAGCGTTAATCGGAATTTACTGGGCGTAAAGCGAGCGTAGGTGGCTTGATAAGTCAGATGTGAAATCCC  
CGGGCTTAACCTGGGACTGCATCTGATACTGTCAGGCTAGAGTGTAGGAGGAGGTAAGTGAATTCCTAGGTGTAGCGGTG  
AATGCGTAGATATCTGGAGGAATACCGATGGCGAAGGCAGCTTCTGGCATCATACTGACACTGAGGCTCGAAAGCGTG  
GGTAG

>ASV:2366:Genus:Oscillospira

TACGTAGGTGGCAAGCGTTGTCCGGATTTACTGGGTGTAAGGGGCGTGTAGCCGGTGTGTAAGTCAGATGTGAAATCTG  
GAGGCTCAACCTCCAACTGCATTTGAAACTGCGCATCTTAGATATCGGAGAGGTAATCGGAATTCCTAGTGTAGCGGTG  
AATGCGTAGATATTAGGAAGAACACCGATGGCGAAGGCAGTACTGGACGACAAGTACGCTGAGGCGCGAAAGCGTG  
GGAG

>ASV:2367:Genus:Roseburia

TACGTATGGTCAAGCGTTATCCGGATTTACTGGGTGTAAGGGGAGCGAGGCGGAAGGCTAAGTCTGATGTGAAAGCCC  
GGGGCTCAACCCGGTACTGCATTTGAAACTGCCGACTAGAGTGTGGAGGGGTAAGTGAATTCCTAGTGTAGCGGTG  
AATGCTTAGATATCACGAAGAAGTCCGATTGCGAAGGCAGCTTACTGGATTGTAAGTACGCTGATGCTCGAAAGGTG  
GGTAT

>ASV:2368:Family:Lachnospiraceae

TACGTAGGGGCAAGCGTTATCCGGATTTACTGGGTGTAAGGGGAGCGTAGACGGCGATGCAAGTCTGAAGTGAAGCCC  
AGGGCTTAACCTGGGACTGCTTTGAAACTGTGTTGCTAGAGTGTGGAGAGGTAAGTGAATTCCTAGTGTAGCGGTG  
AATGCGTAGATATTAGGAGGAACACCGATGGCGAAGGCAGTACTGGACAGTAACTGACGTTGAGGCTCGAAAGCGTG  
GGAG

>ASV:2369:Order:Bacteroidales

TACGGAGGATCCGAGCGTTATCCGGATTTATTGGGTTAAAGGGAGCGTAGGTGGATTGTTAAGTCAGTTGTGAAGTTT  
GCGGCTCAACCGTAAATGAGTTGAAACTGGCAGTCTTAGTACAGTAGAGGTGGGCGGAATTCGTGGTGTAGCGGTG  
GAATGCGTAGATATCGGAGGAACACCGATGGCGAAGGCAGCTTACTGGCACCAACTGACGCTGAGGCTCGAAAGCGTG  
GGAG

>ASV:2370:Family:Lachnospiraceae

TACGTAGGGGCAAGCGTTATCCGGATTTACTGGGTGTAAGGGGAGCGTAGACGGCGCAGCAAGTCTGATGTGAAAGCCC  
AGGGCTCAACCCGGTACTGCATTTGAAACTGGTCACTAGAGTGTGGAGGGGTAAGTGAATTCCTAGTGTAGCGGTG  
AATGCTTAGATATCACGAAGAAGTCCGATTGCGAAGGCAGCTTACTGGACTGTAAGTACGCTGATGCTCGAAAGGTG  
GGTAT

>ASV:2371:Family:Ruminococcaceae

TACGTAGGGAGCGAGCGTTGTCCGGATTTACTGGGTGTAAGGGTGCAGGCGGGATAGCAAGTCAGGCGTGAATCCA  
TCGGCTTAACTGATGAACTGCGCTTGAAGTGTATTCTTAGTGTAGTGCAGAGGCAGGCGGAATTCGCGTGTAGCGGTG  
AATGCGTAGATATCGGAGGAACACCGATGGCGAAGGCAGCTGCTGGGCTTAACTGACGCTGAGGCACGAAAGCGTG

GGGAG

>ASV:2372:Genus:Parasutterella

TACGTAGGGCGCGAGCGTTAATCGGAATTACTGGGCGTAAAGCGTGCAGGCGGTTGAGTAAGACAGATGTGAAATCCC  
TGAGCTTAACCTTAGGAATTGCATTTGACTGCTCGACTGGAGTGTGTGAGAGGGAGTGAATTCCAAGTGTAGCAGTG  
AAATGCGTAGATATTTGGAAGAACCACCGATGGCGAAGGCAGCCTCTGGGATAACACTGACGCTCATGCACGAAAGCGTG  
GGGAG

>ASV:2373:Genus:Roseburia

TACGTATGGTGCAGCGTTATCCGGAATTACTGGGTATAAAGGGAGCGCAGGCGGTACGGCAAGTCTGATGTGAAAGCCC  
GGGGCTCAACCCCGTACTGCATTGGAACACTGTCGACTAGAGTGTGAGAGGGTAAGTGAATTCTAGTGTAGCGGTG  
AAATGCGTAGATATTAGGAGGAACACCAGTGGCGAAGGCGGCTTACTGGACGATTACTGACGCTGAGGCTCGAAAGCGTG  
GGGAG

>ASV:2374:Family:Ruminococcaceae

TACGTAGGGAGCGAGCGTTGTCCGGAATTACTGGGTGTAAGGGAGCGTAGGCGGGGACGCAAGTTGAATGTGAAAGGTA  
GGGGCTCAACCCCTACTGCTTCAAACACTGTTGCTCTTGAAGTGAAGTAGAGGCAGGCGGAATTCCTAGTGTAGCGGTG  
AAATGCGTAGATATTAGGAGGAACACCAGTGGCGAAGGCGGCTGCTGGGCTTAACTGACGCTGAGGCTCGAAAGCGTG  
GGGAG

>ASV:2375:Family:Ruminococcaceae

TACGTAGGTGGCAGCGTTGTCCGGAATTACTGGGTGTAAGGGTGCCTAGGCGGGGATGCAAGTCAAGTGTGAAATCTA  
TCGGCTTAACTGGTAACTGCATTTGAAACTGCATTTCTTGAAGTGGTGGAGAGGTAAGCGGAATTCCTAGTGTAGCGGTG  
AAATGCGTAGATATTAGGAGGAACACCAGTGGCGAAGGCGGCTTACTGGACACTAACTGACGCTGAGGCACGAAAGCATG  
GGGAG

>ASV:2376:Family:Lachnospiraceae

TACGTATGGAGCAAGCGTTATCCGGAATTTACTGGGTGTAAGGGTGCCTAGGTTGGCAGTGAAGTCAAGTGTGAAAGGCC  
GGAGCTCAACCCCGAGCTGCATTTGAAACTGCATAGCTGGAGTACAGGAGAGGCAGGCGGAATTCCTAGTGTAGCGGTG  
AAATGCGTAGATATTAGGAGGAACACCAGTGGCGAAGGCGGCTGCTGGACTTAACTGACACTGAGGCACGAAAGCGTG  
GGGAG

>ASV:2377:Genus:Dialister

TACGTAGGTGGCAGCGTTGTCCGGAATTTACTGGGCGTAAAGCGCGCAGGCGGCTTCCCAAGTCCCTCTTAAAGTGC  
GGGGCTTAAACCCGTGATGGGAAGAAAAGTGGGAAGCTGGAGTATCGGAGAGGAAAGTGAATTCTAGTGTAGCGGTGA  
AATGCGTAGAGATTAGGAAGAACACCAGTGGCGAAGGCGACTTCTGGACGAAAAGTACGCTGAGGCGCAAAGCGTGG  
GGAGC

>ASV:2378:Genus:Caproiciproducens

TACGTAGGGAGCGAGCGTTGTCCGGAATTTACTGGGTGTAAGGGTGCCTAGGCGGACTGGCAAGTCAAGTGTGAAAAGTGA  
TGGGCTTAAACCATAGACTGCCATTGAAACTGTTGGTCTTGAAGTGAAGTAGAGGCAGGCGGAATTCCTAGTGTAGCGGTG  
AAATGCGTAGAGATCGGGAGGAACACCAGTGGCGAAGGCGGCTGCTGGGCTTAACTGACGCTGAGGCACGAAAGTGTG  
GGTAG

>ASV:2379:Genus:Nubsella

TACGGAGGATCAAGCGTTATCCGGAATTTACTGGGTTAAAGGGTGCCTAGGCGGCTGTTAAGTCAAGGGTGAAGAGCG  
GTAGCTCAACTATCGCAGTGCCTTGTACTGACGGGCTTGAATTGACTAGAGGTAGGCGGAATGTGACAAGTACGCGGTG  
AAATGCATAGATATGTCACAGAACCACCGATTGCGAAGGCAGCTTACTATGGTCTATTGACGCTGAGGCACGAAAGCGTG  
GGGAT

>ASV:2380:Genus:Acinetobacter

TACAGAGGGTGCAGCGTTAATCGGATTTACTGGGCGTAAAGCGTGCCTAGGCGGCTTCTTAAGTCCGATGTGAAATCCC  
TGAGCTTAACTTAGGAATTGCATTCGATACTGGGAAGCTAGAGTATGGGAGAGGATGGTAGAATTCAGGTGTAGCGGTGA  
AAATGCGTAGAGATCTGGAGGAATACCGATGGCGAAGGCAGCCATCTGGCTAATACTGACGCTGAGGTACGAAAGCATG  
GGGAG

>ASV:2381:Family:Family\_XIII

TACGTAGGGGCGAGCGTTATCCGGAATTTACTGGGCGTAAAGAGTGCCTAGGTTGGCTTTTAAAGCGCAGGGTTAAAGGCA  
ATGGCCCAACCATTTGCTCGCCCTGCGAACTGGAAGGCTTGAAGTGCAGGAGAGGAAAGCGGAATTCCTAGTGTAGCGGTGA  
AATGCGTAGATATTAGGAGGAACACCAGTGGCGAAGGCGGCTTCTGGACTGTAAGTACACTGAGGCACGAAAGTGTG  
GGAGC

>ASV:2382:Family:Ruminococcaceae

AACGTAGGTCACAAGCGTTGTCCGGAATTACTGGGTGTAAGGGAGCGCAGGCGGGCGATCAAGTTGGAAGTGAATCCA  
TGGGCTCAACCCATGAACTGCTTCAAACACTGATTGTCTTGAAGTGTGAGTAGGAGGAGGCGGAATTCCTAGTGTAGCGGTG  
AAATGCGTAGATATTAGGAGGAACACCAGTGGCGAAGGCGGCTTACTGGACGATAACTGACGTTGAGGCTCGAAAGCGTG  
GGGAG

>ASV:2383:Genus:Catabacter

TACGTAGGGAGCAAGCGTTGTCCGGAATTTACTGGGCGTAAAGGGTGCCTAGGTTGGCTATGTAAGTCAAGTGTGAAAGACC  
GGGGCTTAAACCCGGGTTGCATTTGAAACTGTGTGGCTTGAAGTACAGGAGAGGGAAGTGAATTCTAGTGTAGCGGTG  
AAATGCGTAGATATTAGGAGGAACACCAGTGGCGAAGGCGACTTCTGGACTGTAAGTACACTGAAGCACGAAAGCGTG  
GGGAG

>ASV:2384:Genus:Bacteroides

TACGGAGGATCCGAGCGTTATCCGGAATTTACTGGGTTAAAGGGAGCGTAGGCGGACGCTTAAAGTCAAGTGTGAAAGTTT  
GCGGCTCAACCGTAAAATTGCAGTTGAAACTGGCAGTCTTGAAGTACAGTAGAGGTGGGCGGAATTCGTGGTGTAGCGGTG  
AAATGCGTAGATATTAGGAGGAACATCAGTGGCGAAGGCGGCTTACTGGGCTTAACTGACGCTGAGGCTCGAAAGCGTG  
GGGAG

>ASV:2385:Genus:Collinsella

TACGTAGGGTGCAGCGTTATCCGGAATTCATTGGGCGTAAAGCGCGCTAGGCGGCCGGCAGGCCGGGGTCAAGCGG



GGGGCTCAACCCCGAAGCCCGGAACCTCCGCGCTTGGGTCCGGTAGGGGAGGGTGGAAACCCCGGTGTAGCGGTG  
GAATGCGCAGATATCGGGTGGAAACCCGGTGGCGAAGGCGGTCTACTGGGCACCAACTGACGCTGAGGCTCGAAAGCATG  
GGTAG

>ASV:2386:Genus:Eggerthella

TACGTAGGGAGCGAGCGTTATCCGGATTATTGGGCGTAAAGAGCGCGTAGGCGGCCTCTCAAGCGGGATCTCTAATCCG  
AGGGCTCAACCCCGCGGATCCCGAACTGGGAGGCTCAGTTCGGTAGAGGCAGGCGGAATTCCTGGTGTAGCGGTGG  
AATGCGCAGATATCGGGAAGAACACCGATGGCGAAGGCAGCTGCTGGGCCGAAACTGACGCTGAGGCGCGAAAGCTAGG  
GGAGC

>ASV:2387:Genus:Bacteroides

TACGGAGGATCCGAGCGTTATCCGGATTTATTGGGTTAAAGGGAGCGTAGGCGGGTGTAAAGTCAGTTGTGAAAGTTT  
GCGGCTCAACCGTAAAATTGCAGTTGAAACTGGCAGTCTTGGTACAGTAGAGGTGGCGGAATTCGTGGTGTAGCGGTG  
AAATGCGTAGATATCGGAGGAACACCGATGGCGAAGGCGACCTACTGGGCACCAACTGACGCTGAGGCTCGAAAGTGTG  
GGTAT

>ASV:2388:Genus:Stenotrophomonas

TACAAAGGGTGAAGCGTTACTCGGAATTACTGGGCGTAAAGCGTGCCTAGGTGGTGTAGGTCTGTGAAAGCCC  
TGGGCTCAACCTGGGAATTGCAGTGGATACTGGGCGACTAGAGTGTGGTAGAGGGTAGTGGAAATTCCTGGTGTAGCAGTG  
AAATGCGTAGAGATCGGAGGAACATCCATGGCGAAGGCAGCTACTGGACCAACTGACACTGAGGCACGAAAGCGTG  
GGGAG

>ASV:2389:Genus:Coprococcus\_2

TACGTATGGTGAAGCGTTATCCGGATTTACTGGGTGTAAGGGTGCCTAGGTGGCAAGGCAAGTTTGAAGTAAAATCC  
GGGGCTCAACCTCGGAAGTCTTTGAAACTGTTTAGCTAGAGTACAGGAGAGGTAAGTGGAAATTCCTAGTGTAGCGGTG  
AAATGCGTAGATATTAGGAGGAACACCGATGGCGAAGGCGACTTACTGGACTGCTACTGACACTGAGGCACGAAAGCGTG  
GGGAG

>ASV:2390:Family:Enterobacteriaceae

TACGGAGGGTGAAGCGTTAATCGGAATTACTGGGCGCAAAGCGCACGAGGCGGTCTGTCAAGTCGGATGTGAAATCCC  
CGGGCTCAACCTGGGAAGTGCATTGAAACTGGCAGGCTTGGTCTGTAGAGGGGGTAGAATTCAGGTGTAGCGGTG  
AAATGCGTAGAGATCTGGAGGAATACCGGTGGCGAAGGCGGCCCTGGACAAGACTGACGCTCAGGTGCGAAAGCGTG  
GGGAG

>ASV:2391:Genus:Bacteroides

TACGGAGGATCCGAGCGTTATCCGGATTTATTGGGTTAAAGGGAGCGTAGGCGGGTGTAAAGTCAGTTGTGAAAGTTT  
GCGGCTCAACCGTAAAATTGCAGTTGATACTGGTCTTGGTGCAGTAGAGGTAGGCGGAATTCGTGGTGTAGCGGTG  
AAATGCTTAGATATCACGAAGAACCCCGATTGCGAAGGCAGCTTGTAAACTGTAACGACGCTCATGCTCGAAAGTGTG  
GGTAT

>ASV:2392:Family:Weeksellaceae

TACGGAGGGTGAAGCGTTATCCGGATTTATTGGGTTAAAGGGTCCGTAGGCGGATTAGTAAGTCAGTGGTAAAAGCCC  
GCAGCTCAACTGTGGAAGTGCATTGATACTGCTAGTCTTGGTGTAGTTGAAGTAGCTGGAATGAGTAGTGTAGCGGTG  
AAATGCGTAGATATTACTCAGAACACCAATTGCGAAGGCAGTACTAAGTTACAACGACGCTGATGGACGAAAGCGTG  
GGGAG

>ASV:2393:Genus:Lachnospiraceae\_UCG-006

TACGTATGGTGAAGCGTTATCCGGATTTACTGGGTGTAAGGGAGCGTAGACGGCATGGCAAGTCTGGAGTAAAAGGCA  
TGGGCTCAACCCGTGGACTGCTTTGAAACTGTAAAGCTAGAGTGTGGAGAGGCAAGTGGAAATTCCTAGTGTAGCGGTG  
AAATGCGTAGATATTAGGAGGAACACCGATGGCGAAGGCGGCTTGTGGACGATGACTGACGTTGAGGCTCGAAAGCGTG  
GGGAG

>ASV:2394:Order:Bacteroidales

TACGGAGGATCCGAGCGTTATCCGGATTTATTGGGTTAAAGGGAGCGTAGGCGGACGCTTAAAGTCAGTTGTGAAAGTTT  
GCGGCTCAACCGTAAAATTGCAGTTGATACTGGTGTCTTGGTACAGTAGAGGTAGGTGGAATTCCTGGTGTAGCGGTG  
GAATGCGTAGATATCGGAGGAACACCGATGGCGAAGGCGACCTACTGGGCACCAACTGACGCTGATGCTCGAAAGCATG  
GGTAG

>ASV:2395:Family:Ruminococcaceae

TACGTAGGTGGCAAGCGTTATCCGGATTTACTGGGTGTAAGGGCGTGTAGGCGGGACTGCAAGTCAGGTGTGAAAACCTA  
TGGGCTCAACCCATAGCCTGCATTTGAAACTGTAGTCTTGGTACTGGAGAGGCGATCGGAATTCCTGTGTAGCGGTG  
AAATGCGTAGATATACGAGGAACACCGATGGCGAAGGCGGATCGCTGGACAGCAACTGACGCTGAGGCGCGAAAGCGTG  
GGGAG

>ASV:2396:Genus:Parabacteroides

TACGGAGGATCCGAGCGTTATCCGGATTTATTGGGTTAAAGGGTGCCTAGGCGGCCTTTTAAAGTCAGCGGTGAAAGTCT  
GTGGCTCAACCATAGAATTGCCGTTGAAACTGGGGGCTTGGATGTTTGGAGCAGGCGGAATGCGTGGTGTAGCGGTG  
AAATGCTTAGATATCACGAGAACCCCGATTGCGAAGGCAGCGTACTGGCGCCTGACTGACGCTGAGGCACGAAAGCGTG  
GGGAT

>ASV:2397:Family:Ruminococcaceae

TACGGAGGGTGAAGCGTTGTCCGGAATTACTGGGTGTAAGGGAGCGCAGGCGGACCGGCAAGTTGGAAGTAAAACCTA  
TGGGCTCAACCCATAAATTGCTTTCAAAGTGTGGCTTGGTACTGAGTAGTGCAGAGGTAGGTGGAATTCCTGGTGTAGCGGTG  
AAATGCTTAGATATCACGAAGAACCCCGATTGCGAAGGCAGCTTACTAACTGTAACCTGACATTGATGCTCGAAAGTGTG  
GGTAT

>ASV:2398:Genus:Christensenellaceae\_R-7\_group

TACGTAGGGGGCAAGCGTTGTCCGGAATGATTGGGCGTAAAGGGCGCGTAGGCGGCCCGGTAAGTCTGGAGTAAAAGTCC  
TGCTTTTAAAGTGGGAATTGCTTTGGATACTGTCGGGCTTGGTGCAGGAGAGGTTAGTGGAAATTCCTAGTGTAGCGGTG  
AAATGCGTAGAGATTGGGAGGAACACCGATGGCGAAGGCGACTAACTGGACTGTAACCTGACGCTGAGGCGCGAAAGTGTG  
GGGAG

>ASV:2399:Genus:Sutterella  
TACGTATGGTGCAAGCGTTATCCGGATTTACTGGGTGTAAAGGGAGCGTAGGCGGTCTGACAAGTCAGAAGTGAAAGCCC  
GGGGCTCAACCTGGGAATTGCATATATGACTGCAAGACTTGAGTTTTCAGAGGAGGGTGAATTCCAAGTGTAGCAGTG  
AAACGCGTAGATATTTGGAAGAACCACCGATGGCGAAGGCAGCCCTCTGGGACATGACTGACGCTCATGCACGAAAGCGTG  
GGGAG

>ASV:2400:Genus:Tyzzerella\_4  
TACGTATGGTGCAAGCGTTATCCGGATTTACTGGGTGTAAAGGGAGCGTAGACGGTTGTGTAAGTCTGATGTGAAAGCCC  
GGGGCTCAACCCGGGACTGCATTGGAACTATGTAAGTGTGCGGAGAGGTAAGCGGAATTCCTAGTGTAGCAGTG  
AAATGCGTAGATATTAGGAGGAACATCAGTGGCGAAGGCAGGCTTACTGGGCTTTAACTGACGCTGAGGCTCGAAAGCGTG  
GGGAG

>ASV:2401:Genus:Ruminococcaceae\_UCG-005  
TACGTAGGTTGCGAGCGTTGTCCGGATTTACTGGGTGTAAAGGGCGTGTAGGCGGAGATGCAAGTTGGGAGTGAAATCCC  
GGGGCTCAACCCGGGACTGCATTGGAACTATGTAAGTGTGCGGAGAGGCAAGCGGAATTCCTAGTGTAGCAGTG  
AAATGCGTAGATATTAGGAGGAACACCAGTGGCGAAGGCAGGCTTCTGGACGATAACTGACGCTGAGGCGCAAAGCGTG  
GGGAG

>ASV:2402:Genus:Flavonifractor  
TACGTAGGTTGCGAGCGTTATCCGGATTTACTGGGTGTAAAGGGCGTGTAGGCGGACTGCAAGTCAGGTGTGAAACCA  
GGGGCTCAACCTCGGACTGCATTGGAACTGTAGTTCTTGTAGTGTGGAGAGGCAATCGGAATTCCTGTGTAGCAGTG  
AAATGCGTAGATATACGGAGGAACACCAGTGGCGAAGGCAGGATTGCTGGACAGTAAGTACGCTGAGGCGCAAAGCGTG  
GGGAG

>ASV:2403:Genus:Ruminococcaceae\_UCG-014  
TACATATGGGCGAGCGTTATCCGGATTTATTGGGTGTAAAGGGTTCGTAGGCGGAAAGTAAGTCAGTATGTGAAATCC  
CTCGGCTCAACCCGGGACTGCATTGGAACTATTTTTCTTGTAGTGTGAGGGGAAAGTGAATTCCTAGTGTAGCAGTG  
GAAATGCGTAGATATTAGGAAGAACCAGTGGCGAAGGCAGCTTTCTGGACAGTAAGTACGCTGAGGAAACGAAAGTGT  
GGGGA

>ASV:2404:Genus:Ruminococcaceae\_UCG-013  
TACGTAGGTTGCGAGCGTTGTCCGGATTTACTGGGTGTAAAGGGCGTGTAGGCGGTAGGTAAGTCAGATGTGAAATACC  
GGGGCTCAACCCGGGACTGCATTGGAACTGTCTTGTAGTGTGAGGAGGAAAGCGGAATTCCTAGTGTAGCAGTG  
AAATGCGTAGATATTGGGAGGAACACCAGTGGCGAAGGCAGGCTTCTGGACGACAAGTACGCTGAGGCGCAAAGCGTG  
GGTAG

>ASV:2405:Family:Ruminococcaceae  
TACGTAGGAGCGAGCGTTGTCCGGATTTACTGGGTGTAAAGGGTGCCTAGGCGGATGGCAAGTCAGACGTGAAATACC  
GGGGCTCAACCTCGGGGCTGCGTTTGGAACTGTCTTGTAGTGAAGTAGAGGCGAGGCGGAATTCCTAGTGTAGCAGTG  
AAATGCGTAGATATTAGGAGGAACACCAGTGGCGAAGGCAGGCTTCTGGGCTTTAACTGACGCTGATGCACGAAAGCATG  
GGGAG

>ASV:2406:Genus:Ezakiella  
TACGTATGGGCGAGCGTTGTCCGGATTTATTGGGCGTAAAGGGTACGCAGGCGGTTTACCAAGTTGGATGTGAAATCTT  
GTAGCTCAACTACAAACGTGCATCCAAAACCTGGTTAACTTGTAGTAAAGGAGAGGTAAGTGAATTCCTGGTGTAGCAGTG  
GAATGCGTAGATATCAGGAGGAATACCGTGGCGAAGGCAGCTTACTGGACTTAAACTGACGCTGAGGTACGAAAGCGTG  
GGGAG

>ASV:2407:Order:Bacteroidales  
TACGGAGGATGCGAGCGTTATCCGGATTTATTGGGTTTAAAGGGTGCCTAGGTTGGTATTTAAGTCAGCGGTGAAAGTTT  
GTGGCTCAACCATAAAATTGCCGTTGAAACTGGGTTACTTGTAGTGCAGCATAGGTAGGCGGAATTCCTGGTGTAGCAGTG  
AAATGCGTAGATATTAGGAGGAACACCAGTGGCGAAGGCAGGCTTACTGGACGTAAGTACGCTTGGGCTCGAAAGCATG  
GGTAG

>ASV:2408:Genus:Pygmaibacter  
AACGTAGGTGCGAAGCGTTGTCCGGATTTACTGGGTGTAAAGGGAGCGCAGGCGGTTGCGCAAGTTGGAAGTGAACCTCA  
TGGGCTCAACCCATGACCTGCTTTCAAACCTGCCGCTTGTAGTGGTGTAGAGGTAGGCGGAATTCCTGGTGTAGCAGTG  
GAATGCGTAGATATCGGGAGGAACACCAGTGGCGAAGGCAGGCTTACTGGGCTTAACTGACGCTGAGGCTCGAAAGCATG  
GGTAG

>ASV:2409:Genus:Parabacteroides  
TACGGAGGATCCGAGCGTTATCCGGATTTATTGGGTTTAAAGGGTGCCTAGGCGGCTTTTAAAGTCAGCGGTGAAAGTCT  
GTGGCTCAACCATAGAATTGCCGTTGAAACTGGGAGGCTTGTAGTATGTTTGTAGGCGAGGCGGAATGCGTGGTGTAGCAGTG  
AAATGCTTAGATATCACGCAGAACCCGATCGCGAAGGCAGCCTGCTAAGCTGCAACTGACATTGAGGCTCGAAAGTGTG  
GGTAT

>ASV:2410:Genus:Candidatus\_Soleaferrea  
TACGTAGATGCGAGCGTTGTCCGGATTTACTGGGTGTAAAGGGAGTGTAGGCGGCTGGTAAGTTGAATGTGAAACCTT  
CGGGCTCAACCCGGGAGCGTGCATTCAAACCTGCTGCTTGTAGTGAAGTAGAGGCGAGGCGGAATTCCTGGTGTAGCAGTG  
GAATGCGTAGATATCGGGAGGAACACCAGTGGCGAAGGCAGGCTTCTGGGCTTTTACTGACGCTGAGGCTCGAAAGCATG  
GGTAG

>ASV:2411:Genus:Silanimonas  
TACGAAAGGTGCAAGCGTTACTCGGAATTTACTGGGCGTAAAGCGTGCCTAGGCGGTTTGTAAAGTCTGACGTGAAATCCC  
CGGGCTCAACCTGGGACGTGCGTTGAAACTGGCGATCTAGAGTACGGTAGAGGGTGGTGAATTCCTGGTGTAGCAGTG  
AAATGCGTAGAGATCGGGAGGAACACTCGTGGCGAAGGCAGGCTTCTGGACAGTACTGACGCTGAGGCGCAAAGCGTG  
GGGAG

>ASV:2412:Kingdom:Bacteria  
TACGAAAGGTGCGAAGTGTGCTCGGATTTACTGGGCGTAAAGCGTCTGTAGGTGGCTTGTAAAGTTAGAGGTGAAAGCCC  
CGGCTCAACCTGGGAACTGCCTTTAAACTGGCGAGCTTGTAGAGTATCAGAGGTAGGCGGAATAACTGGTGTAGAGGTA

AAATTCATAGATATCAGTTGGAACATCCATGGCGAAGGCAGCTTACTGGGGTATTTCTGACACTGAGAGACGAAAGCGTG  
GGGAG  
>ASV:2413:Genus:Blautia  
TACGTAGGGGGCAAGCGTTATCCGGATTTACTGGGTGTAAGGGAGCGTAGACGGCGCAGCAAGTCTGATGTGAAAGGCA  
GGGGCTTAACCCCTGGACTGCATTGAAAAGTGTGTGCTTGGAGTCCGGAGGGGTAAGCGGAATTCCTAGTGTAGCGGTG  
AAATGCGTAGATATTAGGAGGAACACCCAGTGGCGAAGGCAGCTTACTGGACGTTAAGTACGCTTGAGGCTCGAAAGCGTG  
GGGAG  
>ASV:2414:Order:Bacteroidales  
TACGGAGGATCCGAGCGTTATCCGGATTTATTGGGTTAAAGGGTGCAGCGGATTTTCAAGTCAGCGGTAAAATTGT  
GGGGCTCAACCCATCGAGCCGTTGAAACTGGAGGTCTAGAGTGAGCGAGAAGTATGCGGAATGCGTGGTGTAGCGGTGA  
AATGCATAGATATCACGAAGAAGTCCGATTGCGAAGGCAGCTTGTCTGGACTGTAAGTACGCTGATGCTCGAAAGTGTGG  
GTATC  
>ASV:2415:Species:aerophilus/agaradhaerens/altitudinis/amyloliquefaciens/aryabhatai/  
atrophaeus/cereus/firmus/flexus/gibsonii/halotolerans/intestinalis/licheniformis/megaterium/  
mojavensis/murimartini/nakamurai/polyfermenticus/pumilus/safensis/siamensis/sonorensis/  
subtilis/tequilensis/thuringiensis/vallismortis/velezensis/virus  
TACGTAGGTGGCAAGCGTTGTCCGGAATTATTGGGCGTAAAGGGCTCGCAGGCGGTTTCTTAAGTCTGATGTGAAAGCCC  
CCGGCTCAACCCGGGGAGGGTCAATTGAAAAGTGGGAACTTGGAGTGCAGAAGAGGAGAGTGGAAATTCACGCTGTAGCGGTG  
AAATGCGTAGAGATGTGGAGGAACACCCAGTGGCGAAGGCAGCTCTCTGGTCTGTAAGTACGCTGAGGAGCGAAAGCGTG  
GGGAG  
>ASV:2416:Genus:Sphingomonas  
TACGGAGGGAGCTAGCGTTGTCCGGAATTACTGGGCGTAAAGCGCACGCTAGGCGGCTTTGTAAGTTAGAGGTGAAAGCCT  
GGAGCTTAACCTCAGAAATTGCCTTTAAGACTGCATCGCTTGAATCCGGGAGAGGTGAGTGGAAATTCAGTGTAGAGGTG  
AAATTCGTAGATATTCGGAAGAACACCCAGTGGCGAAGGCAGCTCACTGGACCGTATTGACGCTGAGGTGCGAAAGCGTG  
GGGAG  
>ASV:2417:Genus:Lachnospiraceae\_UCG-010  
TACGTAGGGGGCAAGCGTTATCCGGAATTACTGGGTGTAAGGGAGAGTAGGCGGCATGGTAAGTAAGATGTGAAAGCCT  
TAGGCTTAACCTGAGGATTGCATTTAAACTATCAAGCTAGAGTACAGGAGAGGAAAGCGGAATTCCTAGTGTAGCGGTG  
AAATGCGTAGATATTAGGAAGAACACCCAGTGGCGAAGGCAGCTTCTGGACTGAAACTGACGCTGAGGCTCGAAAGCGTG  
GGGAG  
>ASV:2418:Genus:Intestinimonas  
TACGTAGGTGGCAAGCGTTATCCGGAATTACTGGGTGTAAGGGCGTGTAGGCGGGATTGCAAGTCAGACGTGAAAACCTA  
TGGGCTCAACCCATAGCCTGCGTTTGAAGTGTAGTCTTGGAGTGGAGAGGCAATCGGAATTCCTGTGTAGCGGTG  
AAATGCGTAGATATACGGAGGAACACCCAGTGGCGAAGGCAGTGTCTGGACAGTAACTGACGCTGAGGCGCGAAAGCGTG  
GGGAG  
>ASV:2419:Genus:GCA-900066225  
TACGTAGGTAGCGAGCGTTGTCCGGAATTACTGGGTGTAAGGGAGCGTAGGCGGGATTGCAAGTTGAATGTTAAATCTA  
TGGGCTCAACCCATAGCCGCTTCAAAGTGCAGTCTTGGAGTGAAGTAGAGGCAGGCGGAATTCCTAGTGTAGCGGTGA  
AATGCGTAAATATTAGGAGGAACACCCAGTGGCGAAGGCAGCTGTGGGCTTAACTGACGCTGAGGCTCGAAAGCGTG  
GTAGC  
>ASV:2420:Genus:Rikenellaceae\_RC9\_gut\_group  
TACGGGGGATGCGAGCGTTATCCGGATTCATTGGGTTAAAGGGTGCAGTGGCTGTGCGTCAAGTCAGGGGTGAAATTC  
GGGGCTCAACTCCGGGCTGCCCTTGATACTGTCGCGCTGGAGTGCAGGATGCCCGCGGAGGAATGAGTGGTGTAGCGGTG  
AAATGCTTAGATATCACTCAGAACACCCAGTGGCGAAGGCATCTGGCAATCCGTAACGACGCTGAGGCACGAAAGCGTG  
GGGAT  
>ASV:2421:Genus:Allisonella  
TACGTAGGTGGCAAGCGTTGTCCGGAATTACTGGGCGTAAAGCGCGCAGGCGGCCGTGCAAGTCCATCTTAAAGCGT  
GGGGCTTAACCCATGAGGGGATGAAAAGTGCAGGCTGGAGTGTGGAGGGGAAAGTGGAAATTCCTAGTGTAGCGGTGA  
AATGCGTAGAGATTAGGAAGAACACCCGTTGGCGAAGGCAGCTTCTAGACGACAAGTACGCTGAGGCGCGAAAGCGTG  
GGAGC  
>ASV:2422:Family:Ruminococcaceae  
TACGTAGGTGGCAAGCGTTGTCCGGATTTACTGGGTGTAAGGGAGCGCAGGTGAAAACGCAAGTAGGATGTCTAATCTA  
CGGGCTCAACCCGTAACCGCATTCTAAAGTGTGTTTCTTGGAGTGGAGTAGAGGCAGGCGGAATTCCTGGTGTAGCGGTG  
AATGCGTAGATATCGGGAGGAACACCCAGTGGCGAAGGCAGCTTCTAGACGACAAGTACGCTGAGGCTCGAAAGCGTG  
GTAGC  
>ASV:2423:Family:Coriobacteriales\_Incertae\_Sedis  
TACGTATGGTGGCAAGCGTTATCCGGAATCATTGGGCGTAAAGCGCGTAGGCGGCTTTGTAAGCAGGAATTTAAATCTT  
ATGGCTCAACCTAAGTCCGTTCTGAACTGGCAGGCTCGAGTGCAGGAGAGGTAAGTGGAAATTCAGTGTAGCGGTGA  
AATGCGTAGATATTAGGAGGAACATCAGTGGCGAAGGCAGCTTACTGGACTGAAAAGTACGCTGAGGCGCGAAAGCGTG  
GGAGC  
>ASV:2424:Genus:Christensenellaceae\_R-7\_group  
TACGTAGGGGGCGAGCGTTGTCCGGAATGACTGGGCGTAAAGGGCGTGTAGGCGGCTTTTAAAGTCTGGAGTAAAAGCCC  
CATTTTCAAGGTGGGGACTGCTTTGGAGACTGGAGAGCTTGGAGTGCAGGAGAGGTAAGTGGAAATTCAGTGTAGCGGTG  
AAATGCGTAGAGATTGGGAGGAACACCCAGTGGCGAAGGCAGCTTACTGGGCGTAAAGTACGCTGAGGCGCGAAAGCGTG  
GGGAG  
>ASV:2425:Species:albigilva/nasdae/vesicularis  
TACGAAGGGGGCTAGCGTTGCTCGGAATTACTGGGCGTAAAGGGAGCGTAGGCGGACATTTAAGTACGGGGTAAAATCCC  
GGGGCTCAACCTCGGAATTCCTTTGATACTGGGTGCTTGGAGTATGAGAGAGGTGTGTGAACTCCGAGTGTAGAGGTG

AAATTCGTAGATATTCGGAAGAACACCCAGTGGCGAAGGCGACACACTGGCTCATTACTGACGCTGAGGCTCGAAAGCGTG  
GGGAG  
>ASV:2426:Genus:Roseburia  
TACGTATGGTGCAAGCGTTATCCGGATTTACTGGGTGTAAGGGAGCGCAGGCGGTACGGCAAGTCTGATGTGAAATCCC  
GGGGCTCAACCCGGTACTGCATTGAAACTGTCGGACTAGAGTGTCCGAGGGGTAAGTGAATTCCTAGTGTAGCGGTG  
AAATGCGTAGATATTAGGAGGAACACCCAGTGGCGAAGGCGGCTTACTGGACGATTACTGACGCTGAAGCTCGAAAGCGTG  
GGGAG  
>ASV:2427:Order:Bacteroidales  
TACGGAGGATCCGAGCGTTATCCGGATTTATTGGGTTAAAGGGAGCGTAGATGGATGTTTAAAGTCAAGTGTGAAAGTTT  
GCGGCTCAACCGTAAAATTGCAGTTGATACTGGATGTCTAGAGTACAGGAGAGGCAGGCGGAATTCCTAGTGTAGCGGTG  
AAATGCGTAGATATTAGGAGGAACACCCAGTGGCGAAGGCGGCTTCTGGACTGTTACTGACACTGAGGCACGAAAGCGTG  
GGGAG  
>ASV:2428:Family:Christensenellaceae  
TACGTAGGGAGCAAGCGTTGTCCGGAATTACTGGGCGTAAAGGGTGCCTAGGCGGCGAGTTAGTCAGAAGTGAATATC  
GGGGCTTAACCCGGGACTGCTTCTGATACTGCTGTGCTCGAGTGCAGGAGAGGTAAGTGAATTCCTAGTGTAGCGGTG  
AAATGCGTAGATATTAGGAGGAACACCCAGTGGCGAAGGCGACTTACTGGACTGTAACGACGCTGAGGCACGAAAGCGTG  
GGTAG  
>ASV:2429:Species:vaginalis  
TACGTAGGGCGCAAGCGTTATCCGGAATTATTGGGCGTAAAGAGCTTGTAGGCGGTTCTGTCGCTGCTGGTGTGAAAGCCC  
ATCGCTTAACCGTGGGTTTGCGCCGGGTACGGGCGGCTAGAGTGCAGTAGGGGAGACTGGAATTCCTGGTGTAAACGGTG  
GAATGTGTAGATATCGGAAGAACACCAATGGCGAAGGCGAGTCTCTGGGCTGTTACTGACGCTGAGAAGCGAAAGCGTG  
GGGAG  
>ASV:2430:Genus:Odoribacter  
TACGGAGGATGCGAGCGTTATCCGGATTTATTGGGTTAAAGGGTGCCTAGGCGGTTGTGTAAGTTAGTGGTCAAATGTC  
ATGGCTCAACCTTGGCTTGGCATTAAAACCTGCACGACTCGAGTACAGACGAGGTAGGCGGAATAAGTTAAGTAGCGGTGA  
AATGCATAGATATACTTAGAACTCCGATAGCGAAGGCGAGTACCAGACTGTAACGACGCTGATGCACGAGAGCATGG  
GTAGC  
>ASV:2431:Family:Family\_XIII  
TACGTAGGGGCGAGCGTTATCCGGAATTATTGGGCGTAAAGAGTGCCTAGGTTGGCTTTTTAAGCGCGGGTTAAGGCA  
ATGGCTTAACCTTGGCTTGGCATTAAAACCTGCACGACTCGAGTACAGACGAGGTAGGCGGAATAAGTTAAGTAGCGGTGA  
AATGCGTAGATATTAGGAGGAACACCCAGTGGCGAAGGCGGCTTCTGGACTGTTACTGACACTGAGGCACGAAAGTGTGG  
GGAGC  
>ASV:2432:Family:Peptococcaceae  
TACGTAGGGGCGAGCGTTGTCCGGAATCACTGGGCGTAAAGGGCGCTAGGCGGTTAATAAGTCAAGTGGTGAAGTCTG  
AGGGCTCAACCTCAGCCTGCCACTGATACTGTTAGACTTGAATGGAAGAGGAGAATGGAATTCCTAGTGTAGCGGTG  
AAATGCGTAGATATTAGGAGGAACACCCAGTGGCGAAGGCGATTCTCTGGGCCAAGACTGACGCTGAGGCAGGAAAGCGTG  
GGGAG  
>ASV:2433:Genus:Bifidobacterium  
TACGTAGGTGGCAAGCGTTATCCGGAATTATTGGGCGTAAAGGGCTCGTAGGCGGTTCTGTCGCTCCGGTGTGAAAGTCC  
ATCGCTTAACCGTGGATCCGCGCCGGGTACGGGCGGCTTGAAGTGCAGTGGGAGACTGGAATTCCTGGTGTAAACGGTG  
GAATGTGTAGATATCGGAGGAACACCCAGTGGCGAAGGCGGCTTACTGGGCACCAACTGACGCTGAGGCTCGAAAGCATG  
GGTAG  
>ASV:2434:Genus:Pseudoclavibacter  
TACGTAGGGTGCAAGCGTTGTCCGGAATTATTGGGCGTAAAGAGCTCGTAGGCGGTTTGTCCGCTGCTGCTGTAATCCT  
GAGGCTCAACCTTGGGCGTGCAGTGGGTACGGGCGAGCTAGAGTGCAGTGGGAGATTGGAATTCCTGGTGTAGCGGTG  
GAATGCGCAGATATCAGGAGGAACACCCAGTGGCGAAGGCGAGTCTCTGGGCCCTACTGACGCTGAGGAGCGAAAGCATG  
GGGAG  
>ASV:2435:Genus:Agathobacter  
CACGTATGGTGCAAGCGTTATCCGGATTTACTGGGTGTAAGGGAGCGCAGGCGGTGCGGCAAGTCTGATGTGAAAGCCC  
GGGGCTCAACCCGGTACTGCATTGAAACTGTCGTAAGTGTGCGGAGGGGTAAGTGAATTCCTAGTGTAGCGGTG  
AAATGCGTAGATATTAGGAGGAACACCCAGTGGCGAAGGCGGCTTACTGGACGATAACTGACGCTGAGGCTCGAAAGCGTG  
GGGAG  
>ASV:2436:Genus:Ruminococcaceae\_UCG-014  
TACGTAGGGAGCGAGCGTTATCCGGATTTATTGGGTGTAAGGGTGCCTAGACGGGAAAATAAGTTAGTGTGAAAGCCC  
TCGGCTTAACCTGAGGAACTGCAACTAAAACCTGTTTTCTTGAAGTACTGGAGAGGAAAGTGAATTCCTAGTGTAGCGGTG  
AAATGCGTAGATATTAGGAGGAACACCCAGTGGCGAAGGCGACTTCTGGACAGAAACTGACGTTGAGGCACGAAAGTGTG  
GGGAG  
>ASV:2437:Genus:Lachnospiraceae\_NK4A136\_group  
TACGTAGGGGCGCAAGCGTTATCCGGATTTACTGGGTGTAAGGGAGCGTAGACGGCAAGGCAAGTCTGAAGTGAAGGCC  
GGGGCTTAACCCGGGACTGCTTTGAAACTGCCTGGCTGGAGTGCAGGAGAGGTAAGCGGAATTCCTAGTGTAGCGGTG  
AAATGCGTAGATATTAGGAGGAACACCCAGTGGCGAAGGCGGCTTACTGGACGTTAAGTGAAGTGTGAAAGGCC  
GGGAG  
>ASV:2438:Species:brachiatum/fujisawaense/gregans/hispanicum/longum/mesophilicum/oryzae/  
phylllosphaerae/phylllostachyos/radiotolerans/tardum  
TACGAAGGGGGCTAGCGTTGCTCGGAATCACTGGGCGTAAAGGGCGGCTAGGCGGCTTTTTAAGTCCGGGGTGAAGCCCT  
GTGGCTCAACCACAGAAATGGCCTTCGATACTGGGACCTTGAAGTATGGTAGAGGTTGGTGAAGTGCAGTGTAGAGGTG  
AAATTCGTAGATATTCGCAAGAACACCCGGTGGCGAAGGCGGCAACTGGACCATTACTGACGCTGAGGCAGGAAAGCGTG  
GGGAG

>ASV:2439:Genus:Bifidobacterium  
TACGTAGGGCGCAAGCGTTATCCGGATTTATTGGGCGTAAAGGGCTCGTAGGCGGCTCGTCGCGTCCGGTGTGAAAAGTCC  
ATCGCTTAACGGTGGATCTGCGCCGGTACGGGCGGGCTGGAGTGCGGTAGGGGAGACTGGAATTCAGGTGTAAACGGTG  
GAATGTGTAGATATCGGGAAGAACACCGATGGCGAAGGCAGGTCTCTGGGCCGTCACTGACGCTGAGGAGCGAAAGCGTG  
GGGAG

>ASV:2440:Genus:Ruminococcaceae\_UCG-010  
TACGTAGGTGGCAAGCGTTATCCGGATTTACTGGGTGTAAAGGGTGAAGTGGAGTGGAGAGGTAACCGGAATTCAGGTGTAGCGGTG  
AAGGCTTAACCTTGAAGTGCATTGGAACTGTTTTCTTGAGAGTGGAGAGGTAACCGGAATTCAGGTGTAGCGGTG  
AAATGCGTAGAGATTGGGAGGAACACCGATGGCGAAGGCAGGATTACTGGACGACAACTGACGCTGATACACGAAAGCGTG  
GGGAG

>ASV:2441:Genus:Acidaminococcus  
TACGTAGGTGGCAAGCGTTGTCCGGAATTATTGGGCGTAAAGAGCATGTAGGCGGGCTTTTAAGTCTGACGTGAAAATGC  
GGGGCTTAACCCCGTATGGCGTTGGATCTGGAAGTCTTGGAGTGCAGGAGAGGAAAGCGGAATTCCTAGTGTAGCGGTG  
AATTCGTAGAGATTAGGAAGAACACCGGTGGCGAAGGCAGCTTTCTGGACGACAACTGACGCTGAGGCGCGAAAGCGTG  
GGAGC

>ASV:2442:Genus:Ruminococcaceae\_UCG-010  
TACGTAGGTGGCGAGCGTTATCCGGATTTACTGGGTGTAAAGGGTGTAGGCGGGATTGCAAGTCAAGTGTGAAATACC  
GAGGCTCAACTTCGGGCTGCATTGGAACTGTAATTCCTGAGAGTGGGAGAGGTAAGCGGAATTCAGGTGTAGCGGTG  
AAATGCGTAGATATCGGAGGAACACCGATGGCGAAGGCAGCTTTCTGGACGACAACTGACGCTGAGACACGAAAGCGTG  
GGGAG

>ASV:2443:Genus:Fusicatenibacter  
TACGTAGGGGGCAAGCGTTATCCGGATTTACTGGGTGTAAAGGGAGCGTAGACGGCGAAGCAAGTCTGGTGTGAAAACCC  
GGGGCTCAACCCCGGCTGCATTGGAACTGTTTTGCTTGGAGTGCAGGAGAGGTAAGCGGAATTCCTAGTGTAGCGGTG  
AAATGCGTAGATATTAGGAGGAACACCGATGGCGAAGGCAGCTTTCTGGACGCAACTGACGCTTGGGCTCGAAAGCGTG  
GGGAG

>ASV:2444:Genus:Blautia  
TACGTAAAGGGCAAGCGTTATCCGGATTTACTGGGTGTAAAGGGAGCGTAGACGGCAGAGCAAGTCTGATGTGAAAGGCA  
GGGGCTCAACCCCGTATGGGATGGAACTGTTCCGCTTGGAGTGCAGGAGAGGTAAGCGGAATTCCTAGTGTAGCGGTG  
AAATGCGTAGATATTAGGAGGAACACCGATGGCGAAGGCAGCTTTCTGGACGCAACTGACGCTTGGGCTCGAAAGCGTG  
GGGAG

>ASV:2445:Species:microaerophilus/microaerophilus  
TACGTAGGTGGCAAGCGTTGTCCGGAATTATTGGGCGTAAAGCGCGCAGGCGGTCACTTAAGTCCATCTTAGAAGTGC  
GGGGCTTAACCCCGTATGGGATGGAACTGGGAGACTGGAGTATCGGAGAGGAAAGTGAATTCCTAGTGTAGCGGTG  
AATGCGTAGATATTAGGAAGAACACCGGTGGCGAAGGCAGCTTTCTGGACGAAACTGACGCTGAGGCGCGAAAGCGTG  
GGAGC

>ASV:2446:Family:Lachnospiraceae  
TACGTATGGTGCAGCGTTATCCGGATTTACTGGGTGTAAAGGGAGCGTAGACGGATGGGCAAGTCTGGAGTGAAGGCC  
GGGGCTCAACCCCGGACTGCTTTGGAACTGTTATCTAGAGTGTGGAGAGGTAAGTGAATTCCTAGTGTAGCGGTG  
AAATGCTTAGATATCACGAAGAACTCCGATTGCGAAGGCAGCTGCTAAGCTGCAACTGACATTGAGGCTCGAAAGTGTG  
GGTAT

>ASV:2447:Family:Lachnospiraceae  
TACGTATGGTGCAGCGTTATCCGGATTTACTGGGTGTAAAGGGAGCGTAGACGGATGGCAAGTCTGATGTGAAAACCC  
GGGGCTCAACCCCGGACTGCAATTGGAACTGTCAATCTAGAGTACCAGGAGAGGCAAGCGGAATTCCTAGTGTAGCGGTG  
AAATGCGTAGATATTAGGAGGAACACCGATGGCGAAGGCAGCTTTACTGGACGTTAAGTGTGAGGCTCGAAAGCGTG  
GGGAG

>ASV:2448:Genus:Fusobacterium  
TACGTATGTCGCAAGCGTTATCCGGATTTATTGGGCGTAAAGCGCGTCTAGGCGGTCTGGTAAGTCTGATGTGAAATGC  
GGGGCTCAACTCCGATTGCGTTGGAACTGCCAGACTAGAGTACTGGAGAGGTTGGCGGAACTACAAGTGTAGAGGTGA  
AATTCGTAGATATTTGTAGGAATGCCGATAGAGAAGTCACTGACGACTGACGCTGAAAGCGCGAAAGCATGG  
GGAGC

>ASV:2449:Family:Lachnospiraceae  
TACGTATGGAGCAAGCGTTATCCGGATTTACTGGGTGTAAAGGGTGCCTAGGTGGTATGGCAAGTCAAGTGTGAAAACCC  
AGGGCTTAACCTGCGACTGCTTTGGAACTGTCAGACTGGAGTGCAGGAGAGGTAAGCGGAATTCCTAGTGTAGCGGTG  
AAATGCTTAGATATCACGAAGAACTCCGATTGCGAAGGCAGCTTTACTGGATTGTAAGTGTGAGGCTGATGCTCGAAAGTGTG  
GGTAT

>ASV:2450:Genus:Ruminococcaceae\_UCG-009  
TACGTAGGTGGCAAGCGTTATCCGGATTTACTGGGTGTAAAGGGCGTGTAGGCGGGATCGCAAGTCAAGGAGTGAAGTCA  
TGGGCTCAACCCATAGAGTGTCTTTGGAACTGTGGTTCTTGGAGTGTGGAGAGGCAGGCGGAATTCAGGTGTAGCGGTG  
AAATGCGTAGATATCGGAGGAACACCGATGGCGAAGGCAGCTGCTGGACATTAAGTGTGAGGCTGAGGCGCGAAAGCGTG  
GGGAG

>ASV:2451:Genus:Christensenellaceae\_R-7\_group  
TACGTAGGGGGCAAGCGTTGTCCGGAATGATTGGGCGTAAAGGGCTCGTAGGTGGCATGTCAAGTCTGAAGTGAAGTCC  
TACTTTAAGGTGGGAATTGCTTTGGAACTGGCAAGCTTGGATATAGGAGAGGTTAGTGAATTCCTAGTGTAGCGGTG  
AAATGCGTAGAGATTAGGAGGAACATCAGTGGCGAAGGCAGCTAACTGGACTAAAAGTGTGACTGAGGAGCGAAAGTGTG  
GGTAG

>ASV:2452:Genus:Acinetobacter  
TACAGAGGTGCGAGCGTTAATCCGGATTTACTGGGCGTAAAGCGTGCCTAGGCGGCTTCGTAAGTTGGATGTGAAATCCC  
CGAGCTTAACCTGGGAATTGCATTCAAACCTGCGAGACTAGAGTATGGGAGAGGATGGTAGAATTCAGGTGTAGCGGTG

AAATGCGTAGAGATCTGGAGGAATACCGATGGCGAAGGCAGCCATCTGGCCTAATACTGACGCTGAGGTACGAAAGCATG  
GGGAG  
>ASV:2453:Genus:Bacteroides  
TACGGAGGATCCGAGCGTTATCCGGATTTATTGGGTTTAAAGGGAGCGTAGGTGGATTGTTAAGTCAGTTGTGAAAGTTT  
GCGGCTCAACCGTAAAATTGCAGTTGAAACTGGCAGTCTTGAGTACAGTAGAGGTGGCGAAATTCGTGGTGTAGCGGTG  
AAATGCTTAGATATACGAAGAAGTCCGATTGCGAAGGCAGCTCACTAGACTGTCACGACTGATGCTCGAAAGTGTG  
GGTAT  
>ASV:2454:Genus:Senegalimassilia  
TACGTATGGGGCGAGCGTTATCCGGATTCATTGGGCGTAAAGCGCGGTAGGCGGAGTGCTAAGCGGGACCTCTAACCCG  
AGGGCTCAACCCCGGCGGGTCCCGAACTGGCGCTCTCGAGTGGGTAGGGGAGAGCGGAATTCCTGGTGTAGCGGTGG  
AATGCGCAGATATCGGGAAGAACCACCGCGGCAAGGCAGCTCTCTGGGCCGAAACTGACGCTGAGGCGCGAAAGCTGGG  
GGAGC  
>ASV:2455:Family:Muribaculaceae  
TACGGAGGATGCGAGCGTTATCCGGATTTATTGGGTTTAAAGGGTGCAGGCGGTCTGTTAAGTCAGCGGTCAAAGCC  
GGGGCTCAACCCCGGCCCGCTTAAACTGGCAGTCTCGAGTTGGAGAGAAGTATGCGGAATGCGCGGTGTAGCGGTGA  
AATGCATAGATATCGCGCAGAAGTCCGATTGCGAAGGCAGCATGCCGCTCCACACTGACGCTGAGGCGCGAAAGCTGGG  
GTATC  
>ASV:2456:Genus:Parabacteroides  
TACGGAGGATCCGAGCGTTATCCGGATTTATTGGGTTTAAAGGGTGCAGGCGGTCTGTTAAGTCAGCGGTGAAAGTCT  
GTGGCTCAACCATAGAATTGCCGTTGAAACTGGGGGCTTGAGTATGTTTGGAGCAGGCGGAATGCGTGGTGTAGCGGTG  
AAATGCTTAGATATACGCGAGAACCCTCGATTGCGAAGGCAGCTGCCAGACCCTGACGCTGAGGCGCGAAAGCTGGG  
GGTAT  
>ASV:2457:Species:desiccabilis/molluscorum  
TACGGAGGGGCTAGCGTTGTTCCGAATTACTGGGCGTAAAGCGCACGTAGGCGGCTTTGTAAGTTAGAGGTGAAAGCCT  
GGAGCTTAACTCCAGAAGTGCCTTTAAAGACTGCATCGCTTGAATCCAGGAGAGGTGAGTGGAAATTCGAGTGTAGAGGTG  
AAATTCGTAGATATTCGGAAGAACCACAGTGGCGAAGGCGGCTCACTGGACTGGTATTGACGCTGAGGTGCGAAAGCGTG  
GGGAG  
>ASV:2458:Family:Ruminococcaceae  
AACGTAGGTCACAAGCGTTGTCGGGAATTACTGGGTGTAAGGGAGCGCAGGCGGGAAGACAAGTTGGAAGTGAATCCA  
TGGGCTCAACCCATGAAGTGCCTTTCAAAGTGTCTTCTGAGTAGTGCAGAGGTAGGCGGAATTCCTAGTGTAGCGGTG  
AAATGCGTAGATATTAGGAGGAACACCAGCGGCGAAGGCGGATTGCTGGACGACAACCGAGGCTGAGACACGAAAGCGTG  
GGGAG  
>ASV:2459:Genus:Akkermansia  
TCCCGCGGTCTCCCGCTTGTTCGGCTCCCTGGGCGTAAAGCGTGCAGTGGCTGTTTCGTAAGTCGTGTGAAAGGCG  
CGGGCTCAACCCCGCGACGGCAGTACTGCGAGACTAGAGTAATGGAGGGGGAACCGGAATTCCTGGTGTAGCAGTGT  
AAATGCGTAGATATCGAGAGGAACACTCGTGGCGAAGGCGGTTCTGACATTAAGTACGCTGAGGCGCGAAAGCCAG  
GGGAG  
>ASV:2460:Genus:Parabacteroides  
TACGGAGGATCCGAGCGTTATCCGGATTTATTGGGTTTAAAGGGTGCAGGCGGCTTTTAAAGTCAGCGGTGAAAGTCT  
GTGGCTCAACCATAGAATTGCCGTTGAAACTGGGGGCTTGAGTATGTTTGGAGCAGGCGGAATGCGTGGTGTAGCGGTG  
AAATGCATAGATATACGCGAGAAGTCCGATTGCGAAGGCAGCTTACTAAACCATAACTGACACTGAAGCACGAAAGCGTG  
GGGAG  
>ASV:2461:Genus:Blautia  
TACGTAGGGGCAAGCGTTATCCGGATTTACTGGGTGTAAGGGAGCGTAGACGGTGTGGCAAGTCTGATGTGAAAGGCA  
TGGGCTCAACCTGTGGACTGCATTGGAAGTGCATCTTGAAGTGCAGGAGGGGTAAGCGGAATTCCTAGTGTAGCGGTG  
AAATGCGTAGATATTAGGAGGAACACCAGTGGCGAAGGCGGCTGCTGGACGACAACGACGCTGAGGCGCGAAAGCGTG  
GGGAG  
>ASV:2462:Genus:Hydrogenoanaerobacterium  
TACGTAGGGTGAAGCGTTGTCGGGAATTACTGGGTGTAAGGGAGCGTAGGCGGGTCAAGTGGATGTGAAATGTA  
CCGGCTCAACTGGTAACTGCATTCAAAGTGTGTTGCTTGAAGTGAAGTAGAGGCGAGGCGGAATTCCTAGTGTAGCGGTG  
AAATGCGTAGATATTAGGAGGAACACCAGTGGCGAAGGCGGCTGCTGGGCTTTTACTGACGCTGAGGCTCGAAAGCATG  
GGGAG  
>ASV:2463:Genus:Pseudomonas  
TACAGAGGGTGAAGCGTTAATCGGAATTACTGGGCGTAAAGCGCGGTAGGTGGTTTGTAAAGTTGGATGTGAAATCCC  
CGGGCTCAACCTGGGAAGTGCATTCAAAGTACTGACTAGAGTATGGTAGAGGGTGGTGGAAATTCCTGTGTATCGGTG  
AAATGCGTAGATATAGGAAGGAACACCAGTGGCGAAGGCGACCACTGGACTGATACTGACACTGAGGTGCGAAAGCGTG  
GGGAG  
>ASV:2464:Genus:Ruminococcaceae\_UCG-005  
TACGTAGGTGCAAGCGTTGTCGGATTTACTGGGTGTAAGGGCGGTAGGCGGAGATTCAAGTCAGGAGTGAAGTAACTA  
TGGGCTTAAACCATAAAGTGCCTTTGAAACTGAATCCCTTGAAGTATCGGAGAGGCGAGGCGGAATTCCTAGTGTAGCGGTG  
AAATGCGTAGATATTAGGAGGAACACCAGTGGCGAAGGCGGCTGCTGGACGACAACGACGCTGAGGCGCGAAAGCGTG  
GGGAG  
>ASV:2465:Genus:Blautia  
TACGTAGGGGCAAGCGTTATCCGGATTTACTGGGTGTAAGGGAGCGTAGACGGAAGCAAGTCTGATGTGAAAGGCT  
GGGGCTTAAACCCAGGACTGCATTGGAAGTGTCTTCTAGAGTGCAGAGAGGTAAGCGGAATTCCTAGTGTAGCGGTG  
AAATGCGTAGATATTAGGAGGAACACCAGTGGCGAAGGCGGCTTACTGGACGGTAAGTGGCGTTGAGGCTCGAAAGCGTG  
GGGAG  
>ASV:2466:Genus:Phocaea

TACGTAGGGAGCGAGCGTTGTCCGGAATTACTGGGTGTAAAGGGAGCGTAGGCGGGGACTCAAGTCGAATGTTAAATCTA  
CCGGCTCAACTGGTAGCTGCGTTCCGAACTGGGACTCTTGAGTGAAGTAGAGGCAGGCGGAATTCCTAGTGTAGCGGTGA  
AATGCGTAGATATTAGGAGGAACACCAAGTGGCGAAGGCGGCTGCTGGGCTTTACTGACGCTGAGGCTCGAAAGCGTGG  
GGAG

>ASV:2467:Genus:Parabacteroides

TACGGAGGATCCGAGCGTTATCCGGATTTATTGGGTTTAAAGGGTGCCTAGGCGGCCCTTAAGTCAGCGGTGAAAAGTCT  
GTGGCTCAACCATAGAAATTGCCGTTGAAACTGGGAGGCTTGAGTATGTTTGGAGGCAGGCGGAATGCGTGGTGTAGCGGTG  
AAATGCGTAGATATCACGCAGAACTCCGATTGCGAAGGCAGCTTACTAAACCATAACTGACACTGAAGCACGAAAGCGTG  
GGAT

>ASV:2468:Genus:Parabacteroides

TACGGAGGATCCGAGCGTTATCCGGATTTATTGGGTTTAAAGGGTGCCTAGGCGGCCCTTAAGTCAGCGGTGAAAAGTCT  
GTGGCTCAACCATAGAAATTGCCGTTGAAACTGGGAGGCTTGAGTATGTTTGGAGGCAGGCGGAATGCGTGGTGTAGCGGTG  
AAATGCTTAGATATCACGCAGAACCCCGATGCGGAGGCGAGCTGCCAAGCCATGACTGACGCTGATGCACGAAAGCGTG  
GGAT

>ASV:2469:Genus:Christensenellaceae\_R-7\_group

TACGTAGGGGGCGAGCGTTGTCCGGAATGATTGGGCGTAAAGGGCGCGTAGGCGGCCCTGCTAAGTCTGGAGTAAAAGTCC  
TGCTTCAAGGTGAGAAATGCTTTGGATACTGGTGGCTGGAGTGCAGGAGAGGAAAGCGGAATACCGGTGTAGCGGTG  
AAATGCGTAGAGATCGTAGGAACACCAAGTGGCGAAGGCGGCTTTCTGGACTGAAACTGACGCTGAGGCGCGAAAGCATG  
GGAG

>ASV:2470:Family:0319-6G20

TACGAGGGGTGCAAGCGTTGTCCGGAATTTATTGGGCGTAAAGGGCAGGTAGGTGGTCTTGAAAGTCTGCTGTGAAATCCC  
CGAGCTTAACCTGGGAAGTGCAGGCGAGATACTCAAGACTAGAGTACTGGAGGGGTTGCTGGAATTCCTGGTGTAGCGGTG  
AAATGCGTAGATATCGGGAGGAACACCAAGGCGAAGGCGGCGAACTTGACAGTTACTGACACTCAACTGCGAAAGCGTG  
GGAG

>ASV:2471:Species: durum

TACGTAGGGTGCAGCGTTGTCCGGAATTTACTGGGCGTAAAGAGCTCGTAGGTGGTGTGTCGCGTCTGCTGTGAAATCCC  
GGGGCTTAACCTCGGGCGTGCAGGCGATACGGGCACGACTAGAGTGTGAGGGGTAAGTGAATTCCTGGTGTAGCGGTG  
GAAATGCGCAGATATCAGGAGGAACCCGATGGCGAAGGCGAGGTTACTGGGCGAGTTACTGACGCTGAGGAGCGAAAGCAT  
GGGA

>ASV:2472:Genus:Oscillibacter

TACGTAGGTGGCAAGCGTTGTCCGGAATTTACTGGGCGTAAAGAGCTCGTAGGTGGTGTGTCGCGTCTGCTGTGAAATCCC  
GAGGCTTAACCTCCGAACCTGCATTGAACTGTAGGCTTGAGTACCAGGAGAGGTTATCGGAATTCCTGTGTAGCGGTG  
AAATGCGTAGATATAAGGAAGAACACCAAGTGGCGAAGGCGGATAACTGGACGCGCAACTGACGCTGAGGCGCGAAAGCGTG  
GGAG

>ASV:2473:Species:brennerae/gaviniae

TACGGAGGGTGCAGCGTTAATCCGGAATTTACTGGGCGTAAAGCGCACGAGGCGGTTTGTCAAGTCCGATGTGAAATCCC  
CGGGCTCAACCTGGGAACCTGCATTGAACTGGCAAGCTAGAGTCTTGAGAGGGGGGTAGAATTCACGCTGTAGCGGTG  
AAATGCGTAGAGATCTGGAGGAATACCGGTGGCGAAGGCGGCCCTTGACAAAGACTGACGCTCAGGTGCGAAAGCGTG  
GGAG

>ASV:2474:Genus:Intestinimonas

TACGTAGGTGGCAAGCGTTATCCGGAATTTACTGGGTTTAAAGGGCGTGTAGGCGGACTGCAAGTCAGATGTGAAATTA  
TGGGCTCAACCCATAAATCGAATTTGAACTGTAGTTCTTGAGTGTGAGAGGCGAGGCGGAATTCCTGTGTAGCGGTG  
AAATGCGTAGATATACGGAGGAACACCAAGTGGCGAAGGCGGCTGCTGGACATTAAGTACGCTGAGGCGCGAAAGCGTG  
GGAG

>ASV:2475:Species:agaricidamosum/lividum/svalbardensis

TACGTAGGGTGCAGCGTTAATCCGGAATTTACTGGGCGTAAAGCGTGCAGGCGGTTTGTAAAGTCTGATGTGAAATCCC  
CGGGCTCAACCTGGGAACCTGCATTGAACTGGCAAGCTAGAGTCTTGAGAGGGGGGTAGAATTCACGCTGTAGCGGTG  
AAATGCGTAGATATGTGGAGGAACACCAAGTGGCGAAGGCGGCTGCTGGACATTAAGTACGCTGATGCACGAAAGCGTG  
GGAG

>ASV:2476:Species:anophelis/meningoseptica/miricola

TACGGAGGGTGCAGCGTTATCCGGAATTTATTGGGTTTAAAGGGTCCGTAGGCGGACTGATAAGTCAGTGGTAAAATCCC  
ACAGCTTAACCTGCGAAGTGCATTGATACTGTTAGTCTTGAGTAAAGTTGAAGTGGCTGGAATAAGTGTAGCGGTG  
AAATGCGTAGATATTACTTAGAACCAATGCGAAGGCAGTCACTAAGTCTTAAGTACGCTGATGGACGAAAGCGTG  
GGAG

>ASV:2477:Family:Lachnospiraceae

TACGTAGGGGGCAAGCGTTATCCGGAATTTACTGGGTTTAAAGGGAGCGTAGACGGCATGGCAAGTCTGAAGTAAAACCC  
AGGGCTCAACCTGGGACTGCTTTGAAACTGTCAAGCTAGAGTGCAGGAGAGGTAAGTGAATTCCTAGTGTAGCGGTG  
AAATGCGTAGATATTAGGAGGAACACCAAGGCGAAGGCGGCTTACTGGACTGTAAGTACGCTGATGGACGAAAGCGTG  
GGAG

>ASV:2478:Species:animalis/thermacidophilum/thermophilum

TACGTAGGGTGCAGCGTTATCCGGAATTTATTGGGCGTAAAGGGCTCGTAGGCGGTTCTGTCGCTCCGGTGTGAAAGTCC  
ATCGCTAACCGTGGATCTGCGCGGGTACGGGCGGCTGAGTGCAGTGGAGGAGACTGGAATTCCTGGTGTAAAGCGTG  
GAATGTGTAGATATCGGAAGAACCAATGGCGAAGGCAGTCTCTGGGCGTTACTGACGCTGAGGAGCGAAAGCGTG  
GGAG

>ASV:2479:Genus:Bacteroides

TACGGAGGATCCGAGCGTTATCCGGATTTATTGGGTTTAAAGGGAGCGTAGGCGGATTTGTAAGACAGTTGTGAAAGTTT  
GCGGCTCAACCGTAAAATGCAAGTGTACTGGCAGTCTTGAGTGCAGTAGAGGTGGGCGGAATTCCTGGTGTAGCGGTG  
AAATGCGTAGATATTAGGAGGAACACCAAGTGGCGAAGGCGACTTACTGGACGATAACTGACGTTGAGGCTCGAAAGCGTG

GGGAG

>ASV:2480:Genus:Ruminococcus\_1

TACGTAGGGAGCGAGCGTTGTCCGGAATTACTGGGTGTAAGGGGAGCGTAGGCGGGATCGCAAGTCAGATGTGAAAACCTA  
TGGGCTTAACCCATAAACTGCATTTGAAACTGTGGTTCTTGTAGTGAAGTAGAGGTAAGCGGAATTCCTAGTGTAGCGGTG  
AAATGCGTAGATATTAGGAGGAACACCAGTGGCGAAGGCGGCTTACTGGACGGTGAATGACGCTGAGGCTCGAAAGCGTG  
GGGAG

>ASV:2481:Genus:Victivallis

TACGTAGGTGCGAGCGTTATCCGGATTTACTGGGCGTAAAGGGTCTGTAGGAGGTTGTTAAATACGAGGTGAAATCCC  
GAAGCTCAACTTCGGAAGTGCCTTGTAGACTGACGGACTAGAGTACCGGAGAGGTAAGCGGAATACAGGTGTAGCGGTG  
GAATGCGTAGATATCTGGTAGAACACCAATAGCGAAGGCAGCTTGTCTGGACGAAACTGACTCTGAAAGACGAAAGCATG  
GGGAG

>ASV:2482:Family:Lachnospiraceae

TACGTATGGAGCAAGCGTTATCCGGATTTACTGGGTGTAAGGGTGCCTAGGTGGCAGTGAAGTCAGATGTGAAAGGCC  
GGGGCTCAACCCCGGAGCTGCATTTGAAACTGCATAGCTAGAGTACAGGAGAGGCAGGTGGAATTCCTAGTGTAGCGGTG  
AAATGCGTAGATATTAGGAGGAACACCAGTGGCGAAGGCGGCTTGTCTGGACTGTTACTGACACTGAGGCACGAAAGCGTG  
GGGAG

>ASV:2483:Genus:Parasutterella

TACGTAGGGTGCAGCGTTAATCCGGAATTTACTGGGCGTAAAGGGTGTGACGGCGTTTTGCAAGATGGATGTGAAAGCCC  
CGGGCTTAACCTGGGAAAGCCATACATGACTGCAAGACTAGAGTGCCTGAGAGGGGGTGAATTCAGTGTAGCAGTG  
AAATGCGTAGATATTTGGAAGAACACCGATGGCGAAGGCAGCCCCCTGGGACGCAACTGACGCTCATACACGAAAGCGTG  
GGGAG

>ASV:2484:Family:Lachnospiraceae

TACGTATGGTGCAGCGTTATCCGGATTTACTGGGGTAAAGGGAGCGTAGACGGATGGCAAGTCTGATGTGAAAACCC  
GGGGCTCAACCCCGGACTGCATTGAAACTGTTTATCTAGAGTGTGGAGAGGTAAGTGAATTCCTAGTGTAGCGGTG  
AAATGCGTAGATATTAGGAGGAACACCAGTGGCGAAGGCGGCTTACTGGACAGTAACTGACGTTGAGGCTCGAAAGGGTG  
GGGAG

>ASV:2485:Species:mediterraneensis/murdochii

TACGTAAAGTCCGAGCGTTGTCCGGAATCATTGGGCGTAAAGGGTACGTAGGCGGGTAAAGCAAGTTAGAAGTAAATCCT  
ATAGCTCAACTATAGTAAGCTTTTAAACTGCTCATCTTGTAGGTATGGAAGGAAAGTGAATTCCTAGTGTAGCGGTGA  
AATGCGCAGATATTAGGAGGAATACCGGTGGCGAAGGCGACTTCTGGCCATAACTGACGCTGAGGTACGAAAGCGTGG  
GTAGC

>ASV:2486:Species:faecalis

TACAGAGGGTGCAGCGTTAATCCGGAATTTACTGGGCGTAAAGCGAGCGTAGGTGGCTTAATAAGTCAGATGTGAAAGCCC  
CGGGCTTAACCTGGGAACGGCATCTGATACTGTTAGGCTAGAGTAGGTGAGAGGAAGTGAATTCAGGTGTAGCGGTG  
AAATGCGTAGAGATCTGGAGGAATACCGATGGCGAAGGCGACTTCTGGCATATACTGACACTGAGGTTGCAAAAGCGTG  
GGTAG

>ASV:2487:Species:wadei

TACGTATGTCGCGAGCGTTATCCGGAATTTACTGGGCGTAAAGGGCATCTAGGCGCCGGATAAGTCTGGGGTAAAACCT  
GCGGCTCAACCGCAAGCCTGCCCTGGAACCTATGCGGCTAGAGTACTGGAGAGGTGGACGGAAGTGCACGAGTAGAGGTG  
AAATTCGTAGATATGTGCAGGAATGCCGATGATGAAGATAGTTCACTGGACGGTAACTGACGCTGAAGTGCAGAAAGCTAG  
GGGAG

>ASV:2488:Genus:Butyricicoccus

TACGTAGGGAGCAAGCGTTATCCGGATTTACTGGGTGTAAGGGGCGAGTAGGCGGGCTGGCAAGTTGGGAGTAAAATGCC  
GGGGCTTAACCCCGGAAGTGCATTTCAAACCTGCTGGTCTTGTAGTGTGGAGAGGCAGGCGGAATTCCTGTGTAGCGGTG  
AAATGCGTAGATATACTGGAGGAACACCAGTGGCGAAGGCGGCTTCTGGACATTAAGTACGCTGAGGAGCGAAAGCGTG  
GGGAG

>ASV:2489:Genus:Anaerococcus

TACGTAAAGACCGAGCGTTGTCCGGAATCATTGGGCGTAAAGGGTACGTAGGCGGGTATTTAAGTTAGAAGTCAAAGGCT  
ATAGCTCAACTATAGTAAGCTTTCAAACCTGATACCTTGTAGAGATGGAAGGAAAGTGAATTCCTAGTGTAGCGGTGG  
AATGCGCAGATATTAGGAAGAATACCGGTGGCGAAGGCGACTTCTGGCCATTTTCTGACGCTGAGGTACGAAAGCGTGG  
GTAGC

>ASV:2490:Genus:Ruminococcaceae\_UCG-013

TACGTAGGTGGCAAGCGTTGTCCGGAATTTACTGGGTGTAAGGGGCGTGTAGACGGGTTTCAAGTCAGATGTGAAATACC  
GCAGCTTAACCTGCGGGGCTGCATTTGAAACTGCAAACTTGTAGTGCAGGAGAGGAAAGCGGAATTCCTAGTGTAGCGGTG  
AAATGCGTAGATATTAGGAGGAACACCAGTGGCGAAGGCGGCTTCTGGACGTAAGTACGCTTGGGCGCAAAAGCGTG  
GGTAG

>ASV:2491:Family:Lachnospiraceae

TACGTAGGGGGCAAGCGTTATCCGGATTTACTGGGTGTAAGGGGAGCGCAGGCGGCATGATAAGTCTGATGTGAAAACCC  
AAGGCTCAACCATGGGACTGCATTGAAACTGCTGCTGGAGTGTGGAGAGGTAAGCGGAATTCCTAGTGTAGCGGTG  
AAATGCGTAGATATTAGGAGGAACACCAGTGGCGAAGGCGGCTTACTGGACGATGACTGACGCTGAGGCTCGAAAGCGTG  
GGGAG

>ASV:2492:Genus:Agathobacter

TACGTATGGAGCAAGCGTTATCCGGATTTACTGGGTGTAAGGGGAGCGTAGGCGGCTTCTGCAAGTCTGATGTGAAAGGCC  
GGGGCTCAACCCCGGACTGCATTGAAACTGTAGGACTAGAGTGTGGAGGGGTAAGTGAATTCCTAGTGTAGCGGTG  
AAATGCGTAGATATTAGGAGGAACACCAGTGGCGAAGGCGGCTTACTGGACGACTACTGACGCTGAGGCTCGAAAGCATG  
GGTAG

>ASV:2493:Genus:Barnesiella

TACGGAGGATCCGAGCGTTATCCGGATTTACTGGGTTAAAGGGTGCCTAGGCGGCACGCCAAGTACGCGGTGAAATTC



CGGGCTCAACCCGAGTGTGCCGTTGAACTGGCGAGCTAGAGTACACAAGAGGCAGGCGGAATGCGTGGTGTAGCGGTG  
AAATGCTTAGATATCACGAAGAATCCGATTGCGAAGGCAGCTTCTGGACTGTAAGTACGCGTGTGCTCGAAAGTGTG  
GGTAT  
>ASV:2494:Genus:Bacteroides  
TACGGAGGATCCGAGCGTTATCCGATTTATTGGGTTTAAAGGGAGCGTAGGTGGACTGGTAAGTCAGTTGTGAAAGTTT  
GCGGCTCAACCGTAAAATTGCAGTTGATACTGTCAGTCTTGAAGTACAGTAGAGGTGGGCGGAATTCGTGGTGTAGCGGTG  
AAATGCGTAGATATCACGCAGAATCCGATTGCGAAGGCAGCTTACTAACTATAACTGACACTGAAGCACGAAAGCGTG  
GGGAT  
>ASV:2495:Family:Ruminococcaceae  
TACGTAGGGAGCGAGCGTTGTCCGATTTACTGGGTGTAAGGGTGCCTAGGCGGGATGGCAAGTCAGATGTGAAATACC  
GGGGCTTAACTCCGGGCTGCATTTGAACTGTCTTCTTGAAGTGAAGTAGAGGCAGGCGGAATTCCTAGTGTAGCGGTG  
AAATGCGTAGATATTAGGAGGAACACCAGTGGCGAAGGCGGATTGCTGGACGACAACGACGGTGAGGCGCGAAAGCGTG  
GGGAG  
>ASV:2496:Genus:Bacteroides  
TACGGAGGATCCGAGCGTTATCCGATTTATTGGGTTTAAAGGGTGCCTAGGTGGTATTAAAGTCAGCGGTGAAAGTTT  
GCGGCTCAACCGTAAAATTGCAGTTGAACTGGGAGTCTTGAAGTACAGTAGAGGTGGGCGGAATTCGTGGTGTAGCGGTG  
AAATGCTTAGATATCACGAAGAATCCGATTGCGAAGGCAGCTACTAGACTGTCACGACTGATGCTCGAAAGTGTG  
GGTAT  
>ASV:2497:Genus:Bacteroides  
TACGGAGGATCCGAGCGTTATCCGATTTATTGGGTTTAAAGGGAGCGTAGGTGGACAGTTAAGTCAGTTGTGAAAGTTT  
GCGGCTCAACCGTAAAATTGCAGTTGATACTGGCCGCTTGAAGTACAGTAGAGGTGGGCGGAATTCGTGGTGTAGCGGTG  
AAATGCTTAGATATCACGAAGAATCCGATTGCGAAGGCAGCTACTAGACTGGTCACTGACACTGAGGCTCGAAAGTGTG  
GGTA  
>ASV:2498:Genus:Anaeroplasmata  
TACGTAGGGAGCGAGCGTTATCCGGAATTATTGGGCGTAAAGGGTGCCTAGATGGCATAAGAAGTCTGTTGTAAAATGC  
TAAGCTCAACTTAGTAGGGCAATGAAACTGATAAGCTAGAGTACAAAAGAGGCAAGTGGAAATTCCTAGTGTAGCGGTAA  
AATGCGTAAATATATGAGGAACACCAGTGGCGAAGGCGGCTTCTGGTTTGATACTGACATTGAGGCACGAAAGCGGTG  
GGAGC  
>ASV:2499:Species:glacieisoli  
TACGTAGGGTGCAGCGTTGTCCGGAATTATTGGGCGTAAAGGGCTCGTAGGCGGTTTGTCCGCTCGGGAGTAAAACCA  
GGTGCTTAAACCTGGCTTGTTCGATACGGGCAGACTAGAGGTATGCAGGGGAGAACGGAATTCCTGGTGTAGCGGTG  
AAATGCGCAGATATCAGGAGGAACACCAGTGGCGAAGGCGGCTTCTGGGCATGACCTGACGCTGAGGAGCGAAAGTGTG  
GGGAG  
>ASV:2500:Genus:Ruminococcaceae\_UCG-005  
TACGTAGGTGGCAAGCGTTGTCCGATTTACTGGGTGTAAGGGGCGTAGGCGGAGAAAGCAAGTCAGAAGTAAAATCCA  
TGGGCTTAAACCATGAACTGCTTTTGAAGTGTTCCTTGAAGTATCGGAGAGGCAGGAGGAATTCCTAGTGTAGCGGTG  
AAATGCGTAGATATTAGGAGGAACACCAGTGGCGAAGGCGGCTTCTGGACGACAACGACGCTGAGGCGCGAAAGCGTG  
GGGAG  
>ASV:2501:Family:Lachnospiraceae  
TACGTAGGGGGCAAGCGTTATCCGATTTACTGGGTGTAAGGGAGCGTAGACGGGACGCAAGTCTGATGTGAAAACCC  
GGGGCTCAACCCGGGACTGCATTGAAACTGTTGATCTAGAGTGTCCGAGAGGTAAGTGGAAATTCCTAGTGTAGCGGTG  
AAATGCGTAGATATTAGGAGGAACACCAGTGGCGAAGGCGGCTTACTGGACGATGACTGACGTTGAGGCTCGAAAGCGTG  
GGGAG  
>ASV:2502:Genus:Parabacteroides  
TACGGAGGATCCGAGCGTTATCCGATTTATTGGGTTTAAAGGGTGCCTAGGCGGCCTCTTAAGTCAGCGGTGAAAGTCT  
GTGGCTCAACCATAGAATTGCCGTTGAAACTGGGAGGCTTGAAGTATGTTTGAAGCAGGCGGAATGCGTGGTGTAGCGGTG  
AAATGCTTAGATATCACGCAGAATCCGATGCGAAGGCAGCTGCTAAGCTGCAACTGACATTGAGGCTCGAAAGTGTG  
GGTAT  
>ASV:2503:Genus:Prevotella\_7  
TACGGAAGGTCGGGTGTTATCCGATTTATTGGGTTTAAAGGGAGCGCAGACTGCCTGTCAAGCGTGCAGTAAAACGCC  
GCGGCCAACCGCGGCTGCTGCGGAACGGCGGCTTGAAGTGGGCTGGAGGCACGCGGAATTCGTGGTGTAGCGGTG  
AAATGCTCAGATATCACGAGGAACCCGATTGCGAAGGCAGCGTCCCTACTGACGTTGAGGCTCGAAGGTGCG  
GGTAT  
>ASV:2504:Family:Lachnospiraceae  
TACGTAGGGGGCAAGCGTTATCCGATTTACTGGGTGTAAGGGAGCGTAGACGGCTGTGCAAGTCTGGAGTAAAATGCC  
GGGGCTCAACCCGGAATGCTTTGAAACTGTACGGCTTGAAGTGTGGAGAGGTAAGCAGGAAATTCCTAGTGTAGCGGTG  
AAATGCGTAGATATTAGGAGGAACACCAGTGGCGAAGGCGGCTTACTGGACAGTAAGTACGTTGAGGCTCGAAAGCGTG  
GGGAG  
>ASV:2505:Species:agri  
TACGTAGGGTGCAGCGTTAACTCGGAATTACTGGGCGTAAAGCGTGCAGGCGGTTGTGCAAGACAGATGTGAAATCCC  
CGGGCTTAACTGGGAACTGCATTTGAACTGACTGCACGGCTAGAGTGTGTCAGAGGGGGTGAATTCACGCTGTAGCAGTG  
AAATGCGTAGATATGTGGAGGAATACCGATGCGAAGGCAGCCCCCTGGGATAAAGTACGCTCATGACGAAAGCGTG  
GGGAG  
>ASV:2506:Genus:Ruminococcaceae\_UCG-013  
TACGTAGGTGGCGAGCGTTGTCCGATTTACTGGGTGTAAGGGGCGCGTAGACGGGTAGATAAGTTAGATGTGAAATACC  
GGAGCTTAACTCCGGGCTGCATTTAAACTGTTTACTTGAAGTGCAGGAGAGGGAAGCAGGAAATTCCTAGTGTAGCGGTG  
AAATGCGTAGATATTAGGAGGAACACCAGTGGCGAAGGCGGCTTCTGGACTGTAAGTACGCTTGAAGGCGCGAAAGCGTG  
GGTAG

>ASV:2507:Species:subtile  
TACGTAGGGTGCAAGCGTTATCCGGAATTATTGGGCGTAAAGAGCTCGTAGGCGGCTTGTCCGCTCCGGTGTGAAAGTCC  
ATCGCTTAACGGTGGATCTGCGCCGGTACGGGCAGGCTAGAATGCGGTAGGGGAGACTGGAATCCCGGTGTAAACGGTG  
GAATGTGTAGATATCGGGAAGAACACCAATGGCGAAGGCAGGTCTCTGGGCCGTTATTGACGCTGAGGAGCGAAAGCGTG  
GGGAG

>ASV:2508:Order:Bacteroidales  
TACGGAGGATGCGAGCGTTATCCGGATTTATTGGGTTTAAAGGGAGCGCAGACGGGAGATTAAGTCAGTTGTGAAAGTTT  
CGGGCTCAACCCGTAATAATTGCAGTTGATACTGTTTCCTTGTAGTGCAGTTGAGGCAGGCGGAATTCGTGGTGTAGCGGTG  
AAATGCGTAGATATATGGAAGAACACCAAGTGGCGAAGGCGGATTGCTGGACGATAACTGACGGTGAGGCGCGAAAGTGTG  
GGGAG

>ASV:2509:Genus:Coprococcus\_1  
TACGTAGGGGGCAAGCGTTATCCGGATTTACTGGGTGTAAAGGGAGCGTAGGCGGGCAGGCAAGTCAGAAGTAAAACCC  
AGGGCTCAACTCTGGGATTGCTTTTGAAGTCTTTGCTTGTATTTCAGGAGAGGTAAGCGGAATTCCTAGTGTAGCGGTG  
AAATGCGTAGATATTAGGAGGAACACCAAGTGGCGAAGGCGGCTTACTGGACTGACAATGACGCTGAGGCTCGAAAGCGTG  
GGGAG

>ASV:2510:Family:Lachnospiraceae  
TACGTATGGTGCAAGCGTTATCCGGATTTACTGGGTGTAAAGGGAGCGCAGGCGGTACGGCAAGTCTGATGTGAAATCCC  
GGGGCTCAACCCGTAATAACTGCATTTGAAACTGTCGGACTAGAGTGTGCGGAGGGTAAGTGAATTCCTAGTGTAGCGGTG  
AAATGCTTAGATATCACGAAGAATCCGATTGCGAAGGCAGCTCACTAGACTGCAACTGACTGATGCTCGAAAGTGTG  
GGTAT

>ASV:2511:Family:Ruminococcaceae  
AACGTAGGTACAAGCGTTGTCCGGAATTACTGGGTGTAAAGGGAGCGCAGGCGGGCGATCAAGTTGGAAGTAAAATCTA  
TGGGCTCAACCCGTAATAACTGCATTTTGAAGTCTTTTCTTGTAGTGTGAGGAGGTAAGCGGAATTCCTGGTGTAGCGGTG  
AAATGCTCAGATATCATGAAGAATCCGATCGCGAAGGCAGGCATCCGGGTGCAACTGACGCTGAGGCTCGAAAGTGTG  
GGTAT

>ASV:2512:Genus:Lachnoclostridium  
TACGTAGGGGGCAAGCGTTATCCGGATTTACTGGGTGTAAAGGGAGCGTAGACGGCTGTGCAAGTCTGAAGTAAAAGCCC  
GGGGCTCAACCCGTAATAACTGCATTTGAAACTGTAAGTGTGCGGAGAGGTAAGTGAATTCCTAGTGTAGCGGTG  
AAATGCGTAGATATTAGGAGGAACACCAAGTGGCGAAGGCGGCTTACTGGACAGTACTGACGTTGAGGCTCGAAAGCGTG  
GGGAG

>ASV:2513:Genus:Ruminococcaceae\_UCG-010  
TACGTAGGTGGCGAGCGTTATCCGGATTTACTGGGTGTAAAGGGAGCGTAGGCGGGGATGCAAGTCAAGTGTGAAAATTA  
CGGGCTTAACCCGTAATAACTGCATTTGAAACTGCAACTCTTGTAGTATGGGAGAGGTAAGCGGAATTCCTGGTGTAGCGGTG  
AAATGCGTAGATATCAGGAGGAACACCAAGTGGCGAAGGCGGCTTACTGGACCAACTGACGCTGAGACACGAAAGCGTG  
GGGAG

>ASV:2514:Genus:Christensenellaceae\_R-7\_group  
TACGTAGGGGGCGAGCGTTGTCCGGAATGACTGGGCGTAAAGGGAGCGTAGGTTGGTCAAGTAAAGTTTGGAGTAAAAGTCC  
TATTTTCAAGGTAGGAACTGCTTTGAAACTGCCTGACTGGAGTGTGAGAGGATAGCGGAATTCCTGGTGTAGCGGTG  
AAATGCGTAGAGATCGGGAGGAACACCAAGTGGCGAAGGCGGCTATCTGGACATAGACTGACTGAGGCGCGAAAGCGTG  
GGTAG

>ASV:2515:Genus:Lachnoclostridium  
TACGTAGGGGGCAAGCGTTATCCGGATTTACTGGGTGTAAAGGGAGCGTAGACGGCAAGCAAGTCTGAAGTAAAACCC  
AGGGCTCAACCCGTTGACTGCTTTGAAACTGTTTTGCTAGAGTGTGCGGAGAGGTAAGTGAATTCCTAGTGTAGCGGTG  
AAATGCGTAGATATTAGGAGGAACACCAAGTGGCGAAGGCGGCTTACTGGACGATAACTGACGCTGAGGCTCGAAAGCGTG  
GGGAG

>ASV:2516:Family:Lachnospiraceae  
TACGTAGGGGGCAAGCGTTATCCGGATTTACTGGGTGTAAAGGGAGCGTAGACGGGCAAGTCTGATGTGAAAGCCC  
GGGGCTTAACCCGTTGACTGCTTTGAAACTGTTTCTTGTAGTGTGCGGAGAGGTAAGCGGAATTCCTAGTGTAGCGGTG  
AAATGCGTAGAGATCGGGAGGAACACCAAGTGGCGAAGGCGGCTGCTGGGCTTAACTGACGCTGAGGCGCGAAAGCATG  
GGTAG

>ASV:2517:Family:Ruminococcaceae  
TACGTAGGTGGCAAGCGTTGTCCGGAATTTACTGGGTGTAAAGGGAGCGTAGGCGGGAGCAAGTCAAGTGTGAAATCCA  
CAGGCTTAACCTGTGGCGTGCATTTGAAACTGTTTTTCTTGTAGTGAAGTAGAGGCAGGCGGAATTCAGTGTAGCGGTG  
AAATGCGTAGATATTCCGAGGAACACCAAGTGGCGAAGGCGGCTGCTGGGCTTTTACTGACGCTGAGGCTCGAAAGCATG  
GGTAG

>ASV:2518:Genus:Bacteroides  
TACGGAGGATCCGAGCGTTATCCGGATTTATTGGGTTTAAAGGGAGCGTAGGTTGGACTGGTAAGTCAAGTGTGAAAGTTT  
GCGGCTCAACCCGTAATAATTGCAGTTGATACTGTCAGTCTTGTAGTACAGTAGAGGTGGGCGGAATTCGTGGTGTAGCGGTG  
AAATGCTTAGATATAACGAAGAATCCGATTGCGAAGGCAGCTCACTGGACTGCAACTGACTGATGCTCGAAAGTGTG  
GGTAT

>ASV:2519:Family:Ruminococcaceae  
TACGTAGGTGGCAAGCGTTGTCCGGAATTTACTGGGTGTAAAGGGAGCGTAGGCGGGAATGCAAGTCAAGTGTAAATCTA  
TCGGCTCAACTGATAGCTGCGCTTGAAGTGCCTTTCTTGTAGTGAAGTAGAGGCAGGCGGAATTCCTAGTGTAGCGGTG  
AATGCGTAGATATTAGGAGGAACACCAAGTGGCGAAGGCGGCTGCTGGGCTTTTACTGACGCTGAGGCTCGAAAGCGTG  
GGAGC

>ASV:2520:Genus:Akkermansia  
TCCCTCTTCTCCCTCTTTTTCTTCTCCCTTTTCTTAAAGCGTGCAGTGGCTGTTTCGTAAGTCTGTGTGAAAGGCG  
CGGGCTCAACCCGTTGAGGACACATGATACTGCGAGACTAGAGTAATGGAGGGGAACCGGAATTCCTGGTGTAGCAGTG

AAATGCGTAGATATCGAGAGGAACACTCGTGGCGAAGGCGGGTTCTTGACATTAACGACGCTGAGGCACGAAGGCCAG  
GGGAG  
>ASV:2521:Genus:Ruminococcaceae\_UCG-013  
TACGTAGGTGGCAAGCGTTGTCCGGATTTACTGGGTGTAAAGGGCGGTAGACGGGTGAGCAAGTCAGATGTGAAATACC  
GCAGCTTAACTGCGGGGCTGCATTTGAAACTGCTTATCTTGAGTGCGGGAGAGGAAAGCGGAATTCCTAGTGTAGCGGTG  
AAATGCGTAGATATTAGGAGGAACACCAGTGGCGAAGGCGGGCTTTCTGGACCGTAACGACGTTGAGGCACGAAGCGTG  
GGTAG  
>ASV:2522:Genus:Blautia  
TACGTAAGGGGCAAGCGTTATCCGGATTTACTGGGTGTAAAGGGAGCGGTAGACGGCTTAGCAAGTCTGATGTGAAAGGCA  
TGGGCTCAACCTGTGGACTGCATTGAAACTGCCAGGCTTGAGTGCCGGAGAGGCAAGCGGAATTCCTAGTGTAGCGGTG  
AAATGCGTAGATATTAGGAGGAACACCAGTGGCGAAGGCGGGCTGCTGGACGTTAACTGACGTTGAGGCTCGAAAGCGTG  
GGGAG  
>ASV:2523:Genus:Ruminococcaceae\_UCG-014  
TACGTAGGGAGCAAGCGTTATCCGGATTTATTGGGTGTAAAGGGTGCGTAGACGGGAAAGCAAGTTAGCTGTGAAATCCC  
TCGGCTCAACCGAGGAAGTCAACTAAACTACTATTCTTGAGTGCTGGAGGGGAAAGTGAATTCCTAGTGTAGCGGTG  
AAATGCGTAGATATTAGGAGGAACACCAGTGGCGAAGGCGACTTTCTGGACAGTAACGACGTTGAGGCACGAAGGTGTG  
GGGAG  
>ASV:2524:Family:Lachnospiraceae  
TACGTAGGGGCAAGCGTTATCCGGATTTACTGGGTGTAAAGGGAGCGGTAGACGGTAGTCAAGTCTGATGTGAAAGGCC  
GGGGCTCAACCCGGGACTGCATTGAAACTGTATACTAGAGTGTCCGGAGAGGTAAGCGGAATTCCTAGTGTAGCGGTG  
AAATGCGTAGATATTAGGAGGAACACCAGTGGCGAAGGCGGGCTACTGGACGATGACTGACGTTGAGGCTCGAAAGCGTG  
GGGAG  
>ASV:2525:Genus:Tyzzerella  
TACGTAGGGGCAAGCGTTATCCGGAATTACTGGGTGTAAAGGGAGCGTAGGCGGCATGGTAAGCCAGATGTGAAAGGCC  
GGGGCTTAACTCCGAGGATTGCATTTGAAACTATCAAGCTAGAGTACAGGAGAGGAAAGCGGAATTCCTAGTGTAGCGGT  
GAAATGCGTAGATATTAGGAAGAACACCAGTGGCGAAGGCGGGCTTTCTGGACTGAAACTGACGCTCAGGCTCGAAAGCGT  
GGGA  
>ASV:2526:Genus:Ruminiclostridium\_5  
TACGTAGGGAGCAAGCGTTGTCCGGATTTACTGGGTGTAAAGGGTGCGTAGGCGGATTGGCAAGTCAGAAGTGAATCCA  
TGGGCTTAAACCATGAAGTGTCTTTGAAACTGTTAGTCTTGAGTGAAGTAGAGGTAGGCGGAATTCCTGGTGTAGCGGTG  
AAATGCGTAGAGATCGGAGGAACACCAGTGGCGTAGGCGGCTACTGGGCTTAACTGACGCTGAGGCACGAAGGTGTG  
GGTAG  
>ASV:2527:Species:crudilactis/psychraerophilum  
TACGTAGGGTGAAGCGTTATCCGGAATTATTGGGCGTAAAGAGCTCGTAGGCGGTTTGTACGCTGGTGTGAAAGTCC  
ATCGCTTAAACCGTGGATCTGCGCCGGGTACGGGCAGGCTAGAGTGCAGTAGGGGAGATTGGAATTCCTGGTGTAAACGGT  
GAATGTGTAGATATCGGGAAGAACACCAATGGCGAAGGCAGATCTCTGGGCTGTTACTGACGCTGAGGAGCGAAAGCATG  
GGGAG  
>ASV:2528:Genus:Subdoligranulum  
TACGTATGGTGAAGCGTTGTCCGGAATTACTGGGTGTAAAGGGAGCGCAGGCGGACCGCAAGTTGGAAGTGA AAACTA  
TGGGCTCAACCCATAAATTGCTTTCAAACCTGCTGGCCTTGTAGTAGTGCAGAGGTAGGTGGAATTCCTGGTGTAGCGGTG  
AAATGCTTAGATATCACGAAGAACCTCCGATTGCGAAGGCAGCTACTGGAGCGCAACTGACGCTGAAGTCTGAAAGTGGC  
GGTAT  
>ASV:2529:Family:Lachnospiraceae  
TACGTATGGAGCAAGCGTTATCCGGATTTACTGGGTGTAAAGGGTGCGTAGGTGGCAGTCAAGTCAAGTCAAGTGTGAAAGTCC  
GGGGCTCAACCCCGGAGTTGCATTTGAAACTGCTCGGCTAGAGTACAGGAGAGGCAGGCGGAATTCCTAGTGTAGCGGTG  
AAATGCGTAGATATTAGGAGGAACACCAGTGGCGAAGGCGGGCTGCTGGACTGTTACTGACACTGAGGCACGAAGCGTG  
GGGAG  
>ASV:2530:Species:brevis/buchneri/helveticus/kefiri/otakiensis/parabuchneri/pontis/sunkii  
TACGTAGGTGGCAAGCGTTGTCCGGATTTATTGGGCGTAAAGCGAGCGCAGGCGGTTTCTTAGGTCTGATGTGAAAGCCT  
TCGGCTTAAACCGGAGAAGTGCATCGGAAACAGGAGACTTGAGTGCAGAAGAGGACAGTGGAACTCCATGTGTAGCGGTG  
AAATGCGTAGATATATGGAAGAACACCAGTGGCGAAGGCGGGCTGCTGGTCTGTAACGACGCTGAGGCTCGAAAGCATG  
GGTAG  
>ASV:2531:Family:Lachnospiraceae  
TACGTAGGGGCAAGCGTTATCCGGATTTACTGGGTGTAAAGGGTGCGTAGGTGGCAAGGCAAGTCAAGTCAAGTGTGAAAGCCC  
GGGGCTCAACCTCGGTACTGCATTTGAAACTGCTGGCTAGAGTGCAGGAGAGGTAAGCGGAATTCCTAGTGTAGCGGTG  
AAATGCGTAGATATTAGGAGGAACACCAGTGGCGAAGGCGGGCTACTGGACTGTAACGACACTGAGGCACGAAGCGTG  
GGGAG  
>ASV:2532:Genus:DTU089  
TACGTAGGGAGCAAGCGTTGTCCGGATTTACTGGGTGTAAAGGGTGCGTAGGCGGATCTGCAAGTCAAGTCAAGTGTGAAATCCC  
GGGGCTTAAACCCGGAAGTGCATTTGAAACTGTTGGTCTTGAGTGAAGTGAAGGAGGCGGGAATTCCTGGTGTAGCGGTG  
AAATGCGTAGAGATCGGAGGAACACCAGTGGCGAAGGCGGGCTGCTGGGCTTAACTGACGCTGAGGCACGAAGCATG  
GGTAG  
>ASV:2533:Genus:Sellimonas  
TACGTATGGTGAAGCGTTATCCGGATTTACTGGGTGTAAAGGGAGCGGTAGACGGAGAAGCAAGTCTGGAGTGAAGGCC  
GGGGCTCAACCCGGGACTGCTTTGAAACTGTTACTCTTGAGTGCCGGAGAGGTAAGCGGAATTCCTAGTGTAGCGGTG  
AAATGCGTAGATATTAGGAGGAACACCAGTGGCGAAGGCGGGCTACTGGACGGTAACTGACGTTGAGGCTCGAAAGCGTG  
GGGAG  
>ASV:2534:Family:Ruminococcaceae

TACGTAGGTGGCAAGCGTTGTCCGGAATTACTGGGTGTAAAGGGAGCGTAGGCGGGGATGCAAGTTGAATGTTTAAACTA  
TCGGCTCAACCCGGTAGTCGCGTTCAAACCTGCGTTTCTTGTAGTGAAGTAGAGGCAAGCGGAATTCCTAGTGTAGCGGTGA  
AATGCGTAGATATTAGGAGGAACACCAGTGGCGAAGGCGGCTTCTGCTGGGCTTTACTGACGCTGAGGCTCGAAAGTGTGG  
GTAGC

>ASV:2535:Genus:Atlantibacter

TACGTATGGTGAAGCGTTAATCGGAATTACTGGGCGTAAAGGCGCACGAGGCGGTCTGTCAAGTCCGATGTGAAATCCC  
CGGGCTCAACCTGGGAAGTGCATCCGAAACTGGCAGGCTAGAGTCTTGTAGAGGGGGGTAGAATTCCTAGTGTAGCGGTG  
AATGCGTAGATATTAGGAGGAACACCAGTGGCGAAGGCGGCTTACTGGACGATAACTGACGTTGAGGCTCGAAAGCGTG  
GGGAG

>ASV:2536:Kingdom:Bacteria

TACAGAGGATGCGAGCGTTGTCCGGATTTATTGGGTTTAAAGGGAGCGCAGGCTGCGAGGCAAGTCAGCGGTCAAATGTC  
GGGGCTCAACCCCGGCTGCCGTTGAAACTGTCTTGTAGAGTTCGAGTGAGGTATGCGGAATGCGTTGTGTAGCGGTGA  
AATGCGTAGAGATTAGGAAGAACACCAGTGGCGAAGGCGGCTTCTCTGACTGTAACGACGCTGAGGCTCGAAAGCGTGG  
GGAGC

>ASV:2537:Kingdom:Bacteria

TACGTAGGGAGCAAGCGTTGTCCGGAATTACTGGGTGTAAAGGGAGCGCAGGCGGGGAGCAAGTCAGCTGTGAAAACCTA  
CGGGCTTAACCTGTAGACTGCACTTGAACCTGGTTTTCTTGTAGTGAAGTAGAGGTTGGCGGAATTCGTGGTGTAGCGGTG  
AATGCGTTAGATATACGAAGAACTCCGATTGCGAAGGCGAGCTGCTGGACTGTAACGACGCTGATGCTCGAAAGTGTG  
GGTAT

>ASV:2538:Genus:Pseudomonas

TACGAAGGGTGAAGCGTTAATCGGAATTACTGGGCGTAAAGGCGCGTAGGTGGTTGTTAAGTTGGATGTGAAAGCCC  
CGGGCTCAACCTGTGAAGTGCATCCAAACTGGCGAGCTAGAGTATGGCAGAGGGTGGTGGAAATTCCTGTGTAGCGGTG  
AATGCGTAGATATTAGGAAGAACACCAGTGGCGAAGGCGACACCTGGGCTAATACTGACACTGAGGTGCGAAAGCGTG  
GGGAG

>ASV:2539:Genus:Agathobacter

TACGTATGGAGCAAGCGTTATCCGGATTTACTGGGTGTAAAGGGAGCGTAGGCGGTTCTGCAAGTCTGATGTGAAAGGCC  
GGGGCTCAACCCGGGACTGCATTGAAACTGTAGGACTAGAGTGTGCGAGGGGTAAGTGGAAATTCCTAGTGTAGCGGTG  
AATGCGTAGATATTAGGAGGAACACCAGTGGCGAAGGCGGCTTACTGGACGACTACTGACGCTGAGGCTCGAAACGTTG  
GGGAG

>ASV:2540:Genus:Dorea

TACGTAGGGGGCAAGCGTTATCCGGATTTACTGGGTGTAAAGGGAGCGTATACGGCATTGCAAGCCAGATGTGAAAGCCC  
GGGGCTCAACCCGGGACTGCATTTGAAACTGTAGAGCTAGAGTGTGCGAGAGGCAAGTGGAAATTCCTAGTGTAGCGGTG  
AATGCGTAGATATTAGGAGTAACACCAGTGTGCAAGGCGGCTTCTGCGACGATGACTGACGTTGAGGCTCGAAAGCGTG  
GGGAG

>ASV:2541:Family:Peptococcaceae

TACGTAGGGAGCGAGCGTTGTCCGGAATTACTGGGCGTAAAGGGCGTGTAGGCGGGGATTTAAGTAGGGTGTGAAAACCTC  
CGGGCTTAACCTGGAGACTGCATTCCTAAACTGGATCTTTGAGGGCAGGAGAGGAAAGTGGAAATTCCTAGTGTAGCGGTG  
AATGCGTAGATATTAGGAGGAACACCAGTGGCGAAGGCGACTTTCTGACTGTACCTGACGCTGAGGCGCGAAAGCGTG  
GGGAG

>ASV:2542:Genus:Intestinimonas

TACGTAGGTGGCAAGCGTTATCCGGATTTACTGGGTGTAAAGGGCGTGTAGGCGGGAAGCAAGTCAGATGTGAAAATTA  
TGGGCTCAACCCATAAAGTGCATTTGAAACTGTTTTCTTGTAGTGTGGAGAGGCAAGCGGAATTCCTGTGTAGCGGTG  
AATGCGTAGATATTAGGAGGAACACCAGTGGCGAAGGCGGCTTCTGCGACAATAACTGACGCTGAGGCGCGAAAGCGTG  
GGGAG

>ASV:2543:Genus:Ruminococcaceae\_UCG-005

TACGTAGGTGGCAAGCGTTGTCCGGATTTACTGGGTGTAAAGGGCGTGTAGGCGGGAAGACAGGTGATGTGAAATGTG  
GGGGCTCAACCCGGAAGTGCATTTGAAACTGTTTTCTTGTAGTATCGGAGAGGCAAGCGGAATTCCTAGTGTAGCGGTG  
AATGCGTAGATATTAGGAGGAACACCAGTGGCGAAGGCGGCTTCTGCGACGACAACGACGCTGAGGCGCGAAAGCGTG  
GGGAG

>ASV:2544:Genus:Ruminococcaceae\_UCG-009

TACGTAGGTGGCAAGCGTTATCCGGATTTACTGGGTGTAAAGGGCGAGTAGGCGGATTGCAAGTCAGATGTGAAAACCTA  
TGGGCTCAACCCATAGACTGCATTTGAAACTGCAGTTCTTGTAGTGTGGAGAGGCAAGCGGAATTCCTGGTGTAGCGGTG  
GAATGCGTAGATATTAGGAGGAACACCAGTGGCGAAGGCGGCTTCTGCGACATAACTGACGCTGAGGCGCGAAAGCGTG  
GGGAG

>ASV:2545:Species:acnes/avidum

TACGTAGGGTGGAGCGTTGTCCGGATTTATTGGGCGTAAAGGGCTCGTAGGTGGTTGATCGCGTGGAAAGTGTAACTCTT  
GGGGCTTAACCTGAGCGTGTCTTTCGATACGGGTTGACTTGGAGAGGTAGGGGAGAATGGAATTCCTGGTGGAGCGGTG  
GAATGCGCAGATATTAGGAGGAACACCAGTGGCGAAGGCGGCTTCTGGGCTTTCTGACGCTGAGGAGCGAAAGCGTG  
GGGAG

>ASV:2546:Family:Xanthobacteraceae

TACGAAGGGGCTAGCGTTGTCCGGAATCACTGGGCGTAAAGGGTGCCTAGGCGGGTCTTTAAGTCAGGGGTGAAATCTT  
GGAGCTCAACTCCAGAACTGCCTTTGATACTGAAGATCTTGTAGTATGGAGAGGTGAGTGGAACTGCGAGTGTAGAGGTG  
AATTCGTAGATATTGCAAGAACACCAGTGGCGAAGGCGGCTCACTGGCCATAACTGACGCTGAGGCGCGAAAGCGTG  
GGGAG

>ASV:2547:Family:Lachnospiraceae

TACGTAGGGGGCAAGCGTTATCCGGATTTACTGGGTGTAAAGGGAGCGTAGACGGAGAGGCAAGTCTGGAGTAAAACCC  
GGGGCTCAACCCGGGACTGCTTTGAAACTGTTTTATCTAGAGTGCAGGAGGGTAAGTGGAAATTCCTAGTGTAGCGGTG  
AATGCGTAGATATTAGGAGGAACACCAGTGGCGAAGGCGGCTTACTGGACGTTAAGTACGCTGAGGCTCGAAAGCGTG

GGGAG

>ASV:2548:Genus:Caproiciproducens

TACGTAGGGAGCGAGCGTTGTCCGGAATTACTGGGTGTAAGGGTGCCTAGGCGGGAAAGCAAGTCAGGCGTAAAACTA  
TCGGCTTAACCTGGTAGACTGCGTTTAACTGTTTTCTTGTAGTGAAGTAGAGGTAGCGGGAATCCCGGTGTAGCGGTG  
GAATGCGTAGAGATCGGGAGGAACACCAGTGGCGAAGGCGCCTACTGGCTTTAACTGACGCTGAGGCACGAAAGCATG  
GGTAG

>ASV:2549:Species:faecium/italicus/sulfureus

TACGTAGGTGGCAAGCGTTGTCCGGAATTATTGGGCGTAAAGCGAGCGAGCGGTTCTTTAAGTCTGATGTGAAAGCCC  
CCGGCTCAACCGGGAGGGTATTGGAACTGGGGAACCTGAGTGCAGAAGAGGAGAGTGGAATCCATGTGTAGCGGTG  
AAATGCGTAGATATATGAGGAACACCAGTGGCGAAGGCGGCTCTCTGGTCTGTAAGTACGCTGAGGCTCGAAAGCGTG  
GGGAG

>ASV:2550:Family:Ruminococcaceae

TACGTAGGTGGCAAGCGTTGTCCGGAATTACTGGGTGTAAGGGCGTGTAGCAGGGAGGCAAGTCAGATGTGAAATCCA  
TGGGCTCAACCCATGAAGTGTCTTCAAACCTGTTTTCTTGTAGTAGTGCAGAGGTAGCGGGAATCCCGGTGTAGCGGTG  
GAATGCGTAGATATCGGGAGGAACACCAGTGGCGAAGGCGGCTGCTGGGCTCTAACTGACGCTGAGGCTCGAAAGTGTG  
GGGAG

>ASV:2551:Genus:Fournierella

AACGTAGGTGGCAAGCGTTGTCCGGAATTACTGGGTGTAAGGGAGTGCAGGCGGGACGGAAGTTGGAAGTAAACCCA  
TGGGCTTAACCCATGAAGTGTCTTCAAACCTGCTTCTTGTAGTGGTGCAGAGGTAGCGGGAATCCCGGTGTAGCGGTG  
GAATGCGTAGATATCGGGAGGAACACCAGTGGCGAAGGCGGCTACTGGGCTAACTGACGCTGAGGCTCGAAAGCATG  
GGTAG

>ASV:2552:Genus:Hydrogenoanaerobacterium

TACGTAGGGAGCAAGCGTTGTCCGGAATTACTGGGTGTAAGGGAGCGTAGGCGGGAATGCAAGTTGAATGTCAAATCTA  
CCGGCTTAACCTGGTAGCCGTTCAAACCTGCGTTCTTGTAGTGAAGTAGAGGCAGGCGGAATCCCTAGTGTAGCGGTGA  
AATGCGTAGATATTAGGAGGAACACCAGTGGCGAAGGCGGCTGCTGGGCTTTACTGACGCTGAGGCTCGAAAGTGTGG  
GTAGC

>ASV:2553:Order:Mollicutes\_RF39

TACGTAGGGAGCAAGCGTTATCCGGAATTACTGGGCGTAAAGAGTTCGTAGGCGGTTTGTAAAGTCTAAGATTAAGCCC  
GAGGCTTAACCTCGGTTCTTTAGATACTGGCAGACTTGTAGTATGGTAGAGGCAAATGGAATCCCTAGTGTAGCGGTGA  
AATGCGTAGATATTAGGAGGAACACCAGTGGCGAAGGCGGCTTCTGGGCCATTACTGACGCTGAGGAACGAAAGCGTGG  
GGAGC

>ASV:2554:Genus:Erysipelatoclostridium

TACGTAGGTGGCAAGCGTTATCCGGAATTATTGGGCGTAAAGAGGGAGCAGGCGGCAATGGAGGTCTGTGGTAAAGGCT  
GAAGCTTAACCTCAGTAAGCCATGAAACCAATAGCTAGAGTGCAGAAGAGGATCGTGAATCCATGTGTAGCGGTGA  
AATGCGTAGATATATGAGGAACACCAGTGGCGAAGGCGACGATCTGGTCTGTAAGTACGCTCAGTCCGAAAGCGTGG  
GGAGC

>ASV:2555:Genus:Tyzzerella

TACGTAGGGGGCAAGCGTTATCCGGAATTACTGGGTGTAAGGGAGCGTAGGCGGCATGGTAAGCCAGATGTGAAAGCCC  
GAAGCTTAACCTCGAGGATTGCATTTGGAATATCAAGCTAGAGTACAGGAGAGGAAAGCGGAATCCCTAGTGTAGCGGT  
GAAATGCGTAGATATTAGGAAGAACACCAGTGGCGAAGGCGGCTTTCTGGACTGAAACTGACGCTGAGGCTCGAAAGCGT  
GGGGA

>ASV:2556:Genus:Christensenellaceae\_R-7\_group

TACGTAGGGGGCGAGCGTTGTCCGGAATGACTGGGCGTAAAGGGCGTGTAGGCGGCCGATTAAGTGTGGAGTGAAGTCC  
ATATTTCAAGTATGGAATTGCTTTGCAAGTGGTGGCTTGTAGTGCAGGAGAGGTAAGTGAATCCCTAGTGTAGCGGTG  
AAATGCGTAGAGATTGGGAGGAACACCAGTGGCGAAGGCGACTTACTGGGCGTAACTGACGCTGAGGCGCGAAAGCGTG  
GGGAG

>ASV:2557:Genus:Ruminococcaceae\_UCG-014

TACGTAGGGAGCGAGCGTTATCCGGAATTATTGGGTGTAAGGGTGCCTAGGCGGGTAAACAAGTTAGTTGTGAAATCCC  
TCGGCTTAACCTGAGGAAGTGAACCTAAACTGTAAGTCTTGTAGTGCAGGAGAGGTAAGTGAATCCCTAGTGTAGCGGTG  
AAATGCGTAGATATTAGGAGGAACACCAGTGGCGAAGGCGACTTACTGGACTGTAAGTACGCTGAGGCTGAGGCACGAAAGTGTG  
GGGAG

>ASV:2558:Genus:Arhodomonas

TACGGAGGGTGAAGCGTTAATCGGAATTACTGGGCGTAAAGCGCGCTAGGCGGTGCAATTAGTCCGGTGTGAAAGCCC  
CGGGCTCAACCTGGGAATTGCATTCGATACTGTTCCGCTAGAGTCTGGTAGAGGGAAGTGAATTTCCGGTGTAGCGGTG  
AAATGCGTAGATATCGGAAGGAACACCAGTGGCGAAGGCGACTTCTGGACCAAGACTGACGCTGAGGTGCGAAAGCGTG  
GGGAG

>ASV:2559:Genus:Parabacteroides

TACGGAGGATCCGAGCGTTATCCGGAATTATTGGGTTAAAGGGTGCCTAGGCGGCCTTTTAAGTACAGCGGTGAAAGTCT  
GTGGCTCAACCATAGAATTGCGTTGAAACTGGGGGCTTGTAGTATGTTTGTAGGCGAGCGGAATGCGTGGTGTAGCGGTG  
AAATGCGTAGATATCACGAGAACCCGATGGCGAAGGCGAGCTGCCAAGCCATTACTGACGCTGATGCACGAAAGCGTG  
GGGAT

>ASV:2560:Genus:Parabacteroides

TACGGAGGATCCGAGCGTTATCCGGAATTATTGGGTTAAAGGGAGCGTAGGCGGCCTTTTAAGTACAGCGGTGAAAGTCT  
GTGGCTCAACCATAGAATTGCGTTGAAACTGGGGGCTTGTAGTATGTTTGTAGGCGAGCGGAATGCGTGGTGTAGCGGTG  
AAATGCGTAGATATCACGAGAACCCGATGGCGAAGGCGAGCTGCCAAGCCATTGCTGACGCTGATGCTCGAAAGTGTG  
GGTAT

>ASV:2561:Species:fairfieldensis

TACGGAGGGTGAAGCGTTAATCGGAATTACTGGGCGTAAAGCGCACGTAGGCTGTTGTGTAAGTACAGGGGTGAAATCCC

ACGGCTCAACCGTGGAACTGCCTTGATACTGCATGACTTGAATCCGGGAGAGGGTGGCGGAATTCAGGTGTAGGAGTG  
AAATCCGTAGATATCTGGAGGAACATCAGTGGCGAAGGCGGCCACCTGGACCGGTATTGACGCTGAGGTGCGAAAGCGTG  
GGGAG

>ASV:2562:Kingdom:Bacteria

TACGGAGGATTTCGAGCGTTATCCGGATTTATTGGGTTTAAAGGGTGCCTAGGTGGTATTAAAGTCAGCGGTGAAAGTTT  
GTGGCTCAACCATAAAATTGCCGTTGAAACTGGGTTACTTGAAGTGCAGGAGGGTAAGCGGAATTCCTAGTGTAGCGGTG  
AAATGCGTAGATATTAGGAGGAACACCAGTGGCGAAGGCGGCTTACTGGACGGTAACGACGTTGAGGCTCGAAAGCGTG  
GGGAG

>ASV:2563:Genus:Barnesiella

TACGGAGGATCCGAGCGTTATCCGGATTTATTGGGTTTAAAGGGTGCCTAGGCGGCACGCCAAGTCAGCGGTGAAATTT  
CGGGCTCAACCCGGACTGTGCCGTTGAAACTGGCGAGCTAGAGTGCACAAGAGGCAGCGGAATGCGTGGTGTAGCGGTG  
AAATGCTTAGATATCACGAAGAACTCCGATTGCGAAGGCAGCTTACTAACCTGTAACGACATTGATGCTCGAAAGTGTG  
GGTAT

>ASV:2564:Family:Lachnospiraceae

TACGTATGGTCAAGCGTTATCCGGATTTACTGGGTGTAAGGGGAGCGTAGACGGACTGGCAAGTCTGATGTGAAAGGCG  
GGGGCTCAACCCCTGGACTGCATTGAAACTGTTTTCTTGAAGTGCAGGAGGGTAAGCGGAATTCCTAGTGTAGCGGTG  
AAATGCGTAGATATCACGAAGAACTCCGATTGCGAAGGCAGCTTACTAACCTGTAACGACGCTGATGCTCGAAAGTGTG  
GGTAT

>ASV:2565:Genus:Erysipelatoclostridium

TACGTAGGTGGCAAGCGTTATCCGGAATTATTGGGCGTAAAGGGGAGCAGGCGGCAATAGAGGTCTGTGGTAAAGGCT  
GAAGCTTAACCTCAGTAAGCCATGAAACAGATAGCTAGAGGACAGCAGAGGAACGCGGAATTCCTAGTGTAGCGGTG  
AATGCGCAGATATATGGAGGAACACCAGTGGCGAAGGCAGCGTTCTGGGCTGTAGCTGACGCTCAGTCCGAAAGCGTGG  
GGAG

>ASV:2566:Genus:Christensenellaceae\_R-7\_group

TACGTAGGGGGCAAGCGTTGTCCGGAATTATTGGGCGTAAAGGGCGCTAGGCGGCCTGATAAGTTTGAAGTAAAAGTCC  
TTCTTTTAAAGGAGGAACTGCTTTGAAACTGTTGGGCTTGAAGTGCAGGAGAGGTAAGCGGAATTCCTGGTGTAGCGGTG  
AAATGCGTAGAGATCGGGAGGAACACCAGTGGCGAAGGCGGCTTACTGGACTGTTACTGACGCTGAGGCGCGAAAGTGTG  
GGGAG

>ASV:2567:Order:Bacteroidales

TACGGAGGATCCGAGCGTTATCCGGATTTATTGGGTTTAAAGGGAGCGTAGATGGATGTTTAAAGTCAGTTGTGAAAGTTT  
GCGGCTCAACCGTAAAATTGCAAGTTGATACTGGGTGTCTTGAAGTACAGTAGAGGCAGGCGGAATTCCTGGTGTAGCGGTG  
AAATGCGTAGAGATGGGGAGGAACACCAGTGGCGAAGGCGGCTTACTGGGCTTAACTGACGCTGAGGCACGAAAGCGTG  
GGTAG

>ASV:2568:Class:Subgroup\_5

TACGGGGGGGGCAAGCGTTGTCCGGAATTACTGGGCGTAAAGGGCGCTAGGCGGTTTGTCTAAGTTGAATGTGAAAACCT  
TGGGCTTAACCCAGAGCCTGCATTCAATACTGGCAGGCTAGAGTTCTGGAGGGGATAGCGGAATTCCTGGTGTAGCGGTG  
AAATGCGTAGATATCAGGAGGAACACCAGTGGCGAAGGCGGCTTACTGGACAGAGTCTGACGCTGAGGCGCGAAAGCTAG  
GGGAG

>ASV:2569:Family:Lachnospiraceae

TACGTATGGTCAAGCGTTATCCGGATTTACTGGGTGTAAGGGGAGCGTAGACGGCGCTGCAAGTCTGAAGTAAAAGCCC  
GGGGCTCAACCCCGGACTGCTTTGAAACTGTAATGCTAGAGTGTGGAGAGGTAAGTGAATTCCTAGTGTAGCGGTG  
AAATGCGTAGATATTAGGAGGAACACCAGTGGCGAAGGCGGCTTACTGGACAGTAACGACGTTGAGGCTCGAAAGCGTG  
GGGAG

>ASV:2570:Order:Rhodospirillales

TACGAAGGGGGCAAGCGTTGTCCGGAATTACTGGGCGTAAAGGGTGTGTAGGCGGTTATGTAAGATAGCGGTGAAATGCC  
GGGGCTCAACCTCGGAATTGCTTTATGACTATATACTAGAATAATGGAGAGGATATCGGAATACCCAGTGTAGAGGTG  
AAATTCGTAGATATTGGGTAGAACACCAGTGGCGAAGGCGGCTTACTGGCCATTTATTGACGCTGAGGCACGAAAGCATG  
GGGAT

>ASV:2571:Family:Lachnospiraceae

TACGTAGGGGGCAAGCGTTATCCGGATTTACTGGGTATAAGGGGAGCGTAGACGGCATGGCAAGCCAGATGTGAAAGCCC  
GGGGCTCAACCCCGGACTGCATTTGAAACTGTCAGGCTAGAGTGTGGAGAGGAAAGCGGAATTCCTAGTGTAGCGGTG  
AAATGCGTAGATATTAGGAGGAACACCAGTGGCGAAGGCGGCTTCTGGACGGTGTGACGTTGAGGCTCGAAAGCGTG  
GGGAG

>ASV:2572:Genus:Libanicoccus

TACGTATGGGGCGAGCGTTATCCGGATTCATTGGGCGTAAAGCGCGCTAGGCGGCCTGGCAGGCCGGGAGTCAAATCCG  
GGGGCTCAACCCCGCCGCTCCCGAACTTTAGGCTTGAAGTGTGGCAGGGGAGGGTGAATACCCGGTGTAGCGGTG  
AATGCGCAGATATCGGGTAGAACACCAGTGGCGAAGGCGGCCCTTCTGGCCACGACTGACGCTGAGGCGCGAAAGCTGGG  
GGAG

>ASV:2573:Genus:Ruminococcaceae\_UCG-005

TACGTAGGTGGCAAGCGTTGTCCGGATTTACTGGGTGTAAGGGGCGTGTAGGCGGAGCTGCAAGTCAGACGTGAAATCTC  
TGGGCTCAACCCAGAACTGCATTTGAAACTGTAGCCTTGAAGTATCGGAGAGGCAAGCGGAATTCCTAGTGTAGCGGTG  
AAATGCGTAGATATTAGGAGGAACACCAGTGGCGAAGGCGGCTTCTGGACGACAACTGACGCTGAGGCGCGAAAGCGTG  
GGGAG

>ASV:2574:Species:micra

TACGTATGGGGCGAGCGTTGTCCGGAATTATTGGGCGTAAAGGGTACGTAGGCGGCCTTTTAAAGTCAGGTGTGAAAGCGT  
GAGGCTTAACCTCATTAAAGCACTTGAACCTGGAAGGCTTGAAGTGAAGGAGAGGAAAGTGAATTCCTAGTGTAGCGGTG  
AATGCGTAGATATTAGGAGGAATACCCGGTGGCGAAGGCGACTTTCTGGACTTTTACTGACGCTCAGGTACGAAAGCGTG  
GGAG

>ASV:2575:Genus:Oscillibacter  
TACGTAGGTGGCAAGCGTTGTCCGGATTTACTGGGTGTAAAGGGCGTGCAGCCGGGAGAACAAAGTCAGATGTGAAATCCC  
GCGGCTTAACCGGAACTGCATTTGAAACTGTTTTCTTGAGTACCGGAGAGGTCATCGGAATTCCTGTGTAGCGGTG  
AAATGCGTAGATATAAGGAAGAACACCACTGGCGAAGGCGGATGACTGGACGGCAACTGACGGTGAGGCGCAAAGCGTG  
GGGAG

>ASV:2576:Family:Ruminococcaceae  
TACGTAGGTCAACAAGCGTTGTCCGGAATTACTGGGTGTAAAGGGTGCAGCGGGGAGAACAAAGTTGGAAGTAAATCCA  
TGGGCTCAACCCATGAAGCTTTCAAACACTGTTTTCTTGAGTAGTGCAGAGGTAGCGGAAATTCCTGGTGTAGCGGTG  
AAATGCTTAGATATACGAAGAAGCTCCGATTGCGAAGGCAGCTTGTGGACTGTAAGTACGCTGATGCTCGAAAGTGTG  
GGTAT

>ASV:2577:Genus:Subdoligranulum  
AACGTAGGTGCAAGCGTTGTCCGGAATTACTGGGTGTAAAGGGAGCGCAGGCGGACCGGCAAGTTGGAAGTAAATCTA  
TGGGCTCAACCCATAAATTGCTTTCAAACACTGTTTTCTTGAGTAGTGCAGAGGTAGCGGAAATTCCTGGTGTAGCGGTG  
GAATGCGTAGATATCGGAGGAACACCACTGGCGAAGGCGGCTACTGGCACCAACTGACGCTGAGGCTCGAAAGTGTG  
GGTAG

>ASV:2578:Class:Clostridia  
TACGTAGGGGGCGAGCGTTGTCCGGAATTACTGGGCGTAAAGGGTGCAGGCGGTTGCTTAAGTTGGATGTGAAATACC  
CGGGCTTAACCTGGGGGTGCATTCAAGACTGGGAACTAGAGTACAGGAGAGGGAAGCGGAAATTCCTAGTGTAGCGGTG  
AAATGCGTAGATATTAGGAGGAACACCGGTGGCGAAGGCGGCTTTCTGGACTGACACTGACGCTGAGGCACGAAAGCGTG  
GGGAG

>ASV:2579:Species:cibarius/hauseri/mirabilis/penneri/terrae/vulgaris  
TACGGAGGTGCAAGCGTTAATCGGAATTACTGGGCGTAAAGCGCACGAGGCGGTCAATTAAGTCAGATGTGAAAGCCC  
CGAGCTTAACCTGGGAATTGCATCTGAAACTGTTGGCTAGAGTCTTGAGTAGAGGGGGTAGAATTCACGCTGTAGCGGTG  
AAATGCGTAGAGATGTGGAGGAATACCGGTGGCGAAGGCGGCCCCCTGGACAAGACTGACGCTCAGGTGCGAAAGCGTG  
GGGAG

>ASV:2580:Genus:Ruminococcaceae\_UCG-002  
TACGTAGGTGGCAAGCGTTGTCCGGATCTACTGGGTGTAAAGGGCGTGTAGCCGGGAGGGCAAGTCAGATGTGAAATCCA  
CGGGCTTAACCTGCGTGAAGCTTTGAAACTACTCTTCTTGAGTATCGGAGAGGCAATCGGAATTCCTAGTGTAGCGGTG  
AAATGCGTAGATATTAGGAGGAACACCACTGGCGAAGGCGGATTGCTGGACGACAAGTACGCTGAGGCGCAAAGCGTG  
GGGAG

>ASV:2581:Genus:Parabacteroides  
TACGGAGGATCCGAGCGTTATCCGGATTTATTGGGTTAAAGGGTGCAGGCGGCTTTTAAGTCAGCGGTGAAAGTTT  
GTGGCTCAACCCATAAATTGCGTTGAAACTGGGTTACTTGTAGTGTGTTTGGAGTAGCGGAAATGCGTGGTGTAGCGGTG  
AAATGCTTAGATATACGAAGAAGCTCCGATTGCGAAGGCAGCTACTAGACTGTCACTGACACTGATGCTCGAAAGTGTG  
GGTAT

>ASV:2582:Family:Lachnospiraceae  
TACGTAGGGGGCAAGCGTTATCCGGATTTACTGGGTGTAAAGGGAGCGTAGGCGGCGCATGCAAGTCAGAAGTAAAGCCC  
GGGGCTCAACCCCGGACTGCTTTTGAACACTGTAAGGCTAGATTGCCGAGAGGTAAGCGGAAATTCCTAGTGTAGCGGTG  
AAATGCGTAGATATTAGGAGGAACATCAGTGGCGAAGGCGGCTTACTGGCTTTAAGTACGCTGAGGCTCGAAAGCGTG  
GGGAG

>ASV:2583:Genus:Roseburia  
TACGTATGGTGCAGCGTTATCCGGATTTACTGGGTGTAAAGGGAGCGCAGGCGGAAGGCTAAGTCTGATGTGAAAGCCC  
GGGGCTCAACCCCGGTACTGCATTGAAACTGGTCACTAGAGTGTGCGGAGGGTAAGTGAATTCCTAGTGTAGCGGTG  
AAATGCGTAGATATTAGGAGGAACATCAGTGGCGAAGGCGGCTTACTGGCTTTAAGTACGCTGAGGCTCGAAAGCGTG  
GGGAG

>ASV:2584:Kingdom:Bacteria  
TACGGAGGATCCGAGCGTTATCCGGATTTATTGGGTTAAAGGGAGCGTAGGCGGACGCTTAGTCAAGTGTGAAAGTTT  
GCGGCTCAACCGTAAATTCAGTTGATACTGGGTGTCTTGAGTACAGCAGAGGTAGGCGGAAATTCCTGGTGTAGCGGTG  
GAATGCGTAGATATCGGAGGAACACCACTGGCGAAGGCGGCTTACTGGCACCAACTGACGCTGAGGCTCGAAAGTGTG  
GGTAG

>ASV:2585:Order:Gastranaerophilales  
TACGGAGGGTGCAGCGTTGTCCGGAATCATTGGGCGTAAAGAGTTCGTAGGTGGTTTGTAAAGTTTGGTGTAAATGCA  
GAGGCTCAACTTCTGTTCCGCATCGGATACTGGCAGACTAGAATGCGGTAGAGGTAAGGGAATTCCTGGTGTAGCGGTG  
AAATGCGTAGATATCAGGAGGAACATCGGTGGCGTAAGCGCTTACTGGGCCGTAATTGACACTGAGGAACGAAAGCCAG  
GGTAG

>ASV:2586:Order:Mollicutes\_RF39  
TACGTAGGGAGCGAGCGTTATCCGGATTTATTGGGTGTAAAGGGTGCAGGCGGTTTATTAGTCTAAGTTTAAAGTCC  
GAAGCTCAACTTCGGTTCGCTTAGAAACCGATTTACTTGTAGTATGGTAGAGGCAAGTGAATTTCTAGTGTAGCGGTAA  
AATGCGTAGATATTAGAAAGAACACCACTGGCGAAGGCGGCTTGTGGCCATCACTGACGCTGAGGACGAAAGCGGTG  
GGAGC

>ASV:2587:Genus:Dielma  
TACGTAGGTGGCAAGCGTTATCCGGAATTATTGGGCGTAAAGGGTGCAGGCGGCGGATTAAGTCCGGAGTAAATTTGT  
GGGGCTCAACCCATCGAGCTTTGAAACTGGTGGCTGGAGTGCAGGAGAGGCAGATGGAATTCATGTGTAGCGGTAA  
AATGCGTAGATATAGGAGGAACACCACTGGCGAAGGCGGCTTGTGGCCGTAAGTACGCTGAGGACGAAAGCGGTG  
GGAGC

>ASV:2588:Kingdom:Bacteria  
TACGTAGGGGGCAAGCGTTATCCGGATTTACTGGGTGTAAAGGGAGCGCAGGCGGACCGGCAAGTTGGAAGTAAACTA  
TGGGCTCAACCCATAAATTGCTTTCAAACACTGCTGGCCTTGTAGTGTGCAGAGGTAGGTGGAATTCGTGGTGTAGCGGTG

AAATGCTTAGATATCACGAAGAACTCCGATTGCGAAGGCAGCTCACTGGACTGCAACTGACACTGATGCTCGAAAGTGTG  
GGTAT  
>ASV:2589:Family:Lachnospiraceae  
TACGGAGGATCCAAGCGTTATCCGGATTTATTGGGTTAAAGGGTGCCTAGGCGGTTTGATAAGTTAGAGGTGAAATTC  
GGGGCTCAACCCCTGGACTGCATTGAAAAGTGTAGTCTTGGAGTCCGGAGAGGTAAGCGGAATTCCTAGTGTAGCGGTG  
AAATGCGTAGATATTAGGAGGAACACCAGTGGCGAAGGCGGCTTACTGGACGTTAACTGACGTTGAGGCGCGAAAGCGTG  
GGGAG  
>ASV:2590:Genus:Erysipelatoclostridium  
TACGTAGGTGGCAGCGTTATCCGGAATCATTGGGCGTAAAGAGGGAGCAGGCGGCCTGGAGGGTCTATTGTTAAAAGGC  
AGTGGCTTAACCATTTGAAGGCGAAGAAACCCGAGGCTAGAGTTCTAAAGAGGATCGTGGAATTCATGTGTAGCGGTG  
AAATGCGTAGATATTAGGAGGAACACCAGTGGCGAAGGCGACGATCTGGGAAGAAACAGACGCTGAGTCCCAGAAAGCGTG  
GGGAG  
>ASV:2591:Family:Bacillaceae  
TACGTAGGTGGCAAGCGTTGTCCGGATTTATTGGGCGTAAAGCGCGCAGGCGGCTTTAAGTCTGATGTGAAATCTT  
GCGGCTCAACCCGCAAGCGGTATTGAAAAGTGGGGACTTGGAGTGCAGAAAGGAAAGTGAATTCACGTGTAGCGGTG  
AAATGCGTAGAGATGTGGAGGAACACCAGTGGCGAAGGCGGCTTCTGGTCTGTAACGACGCTGAGGCGCGAAAGCGTG  
GGGAG  
>ASV:2592:Species:loti  
TACGAAGGGGCTAGCGTTGTTCGGATTTACTGGGCGTAAAGCGCACGTAGGCGGATTGTTAAGTTAGGGGTGAAATCCC  
AGGGCTCAACCTGGAAGTGCCTTTAATACTGGCAATCTCGAGTCCGGAAGAGGTGAGTGAATTCAGTGTAGAGGTG  
AAATTCGTAGATATTGAGGGAACACCAGTGGCGAAGGCGGCTCACTGGTCCGGTACTGACGCTGAGGTGCGAAAGCGTG  
GGGAG  
>ASV:2593:Genus:Ruminococcaceae\_UCG-011  
AACGTAGGTCAACAGCGTTGTCCGGAATTTACTGGGTGTAAGGGTGCCTAGGCGGCTTCTAAAGTCAAGTGTGAAATACC  
GCAGCTCAACTGCGGGGCTGCATTTGAAAAGTGGGAGCTTGGAGTGAAGTAGAGGTAAGCGGAATTCCTAGTGTAGCGGTG  
GAATGCGTAGATATTAGGAGGAACACCAGTGGCGAAGGCGGCTTACTGGGCTTAACTGACGCTGAGGCGCGAAAGCGTG  
GGGAG  
>ASV:2594:Genus:Bacteroides  
TACGGAGGATCCGAGCGTTATCCGGATTTATTGGGTTAAAGGGAGCGTAGGCGGTTGTTAAGTCAAGTGTGAAAGTTT  
GCGGCTCAACCGTAAAATTGCAGTTGATACTGGGTACTTGGAGTGCAGCATAGGTAGGCGGAATTCGTGGTGTAGCGGTG  
AAATGCTTAGATATCACGAAGAACTCCGATTGCGAAGGCAGCTTACTGGATTGTAACGACGCTGATGCTCGAAAGTGTG  
GGTAT  
>ASV:2595:Genus:Lachnoclostridium  
TACGTAGGGGGCAAGCGTTATCCGGATTTACTGGGTGTAAGGGAGCGTAGACGGCGAAGCAAGTCTGAAGTGAAGCCC  
GGGGCTCAACCCCGGACTGCTTTGAAAAGTGTGGTCTTAGAGTGTGGAGAGGTAAGTGAATTCCTAGTGTAGCGGTG  
AAATGCGTAGATATTAGGAGGAACACCAGTGGCGAAGGCGGCTTACTGGACAGTAACTGACGTTGAGGCTCGAAAGCGTG  
GGGAG  
>ASV:2596:Genus:Bacteroides  
TACGGAGGATCCGAGCGTTATCCGGATTTATTGGGTTAAAGGGAGCGTAGGCGGATTGTTAAGTCAAGTGTGAAAGTTT  
GCGGCTCAACCGTAAAATTGCAGTTGATACTGCGTGTCTTGGAGTACAGTAGAGGTGGGCGGAATTCGTGGTGTAGCGGTG  
AAATGCTTAGATATCACGAAGAACTCCGATTGCGAAGGCAGCTGCTGGACTGTAACGACGCTGATGCTCGAAAGTGTG  
GGTAT  
>ASV:2597:Genus:Fournierella  
AACGTAGGTGGCAAGCGTTGTCCGGAATTTACTGGGTGTAAGGGAGCGCAGGCGGCTGCAAGTTGGAAGTGAAGTCA  
TGGGCTCAACCCATGAACTGCTTTCAAAGTGGGATCTTGGAGTGTAGAGGTAGGCGGAATTCCTGGTGTAGCGGTG  
GAATGCGTAGATATCGGAGGAACACCAGTGGCGAAGGCGGCTTACTGGGCACTAACTGACGCTGAGGCTCGAAAGCATG  
GGTAG  
>ASV:2598:Family:Lachnospiraceae  
TACGTAGGGTGAAGCGTTATCCGGATTTACTGGGTGTAAGGGAGCGCAGGCGGTCGGCAAGTCTGATGTGAAAGCCC  
GGGGCTCAACCCCGTACTGCATTGAAAAGTGTGCTACTAGAGTGTGGAGGGGTAAGCGGAATTCCTAGTGTAGCGGTG  
AAATGCTTAGATATCACGAAGAACTCCGATTGCGAAGGCAGCTGCTAAGTGCACGATTGAGGCTCGAAAGTGTG  
GGTAT  
>ASV:2599:Genus:Taibaiella  
TACGGAGGGTGAAGCGTTATCCGGATTTACTGGGTTAAAGGGTGCCTAGGCGGACTTGTAAAGTCAAGGGTGAATCTC  
CGAGCTCAACTCGGAAAGTGCCTTTGATACTATTGGTCTTGAATTATGTTGAGGTTGGCGGAATATAACATGTAGCGGTG  
AAATGCATAGATATGTTATAGAACCAGGATTGCGAAGGCAGCTGGCTAAACATATATTGACGCTGAGGCGCGAAAGCGTG  
GGTAG  
>ASV:2600:Genus:Pseudomonas  
TACAGAGGGTGAAGCGTTAATCCGGAATTTACTGGGCGTAAAGCGCAGTAGGTGGTTTGTAAAGTGGATGTGAAATCCC  
CGGGCTCAACCTGGGAACTGCATCCAAAAGTGGCAAGCTAGAGTATGGTAGAGGGTGGTGAATTCCTGTGTAGCGGTG  
AAATGCGTAGATATAGGAAGGAACACCAGTGGCGAAGGCGACACCTGGACTGATACTGACACTGAGGTGCGAAAGCGTG  
GGGAG  
>ASV:2601:Family:Ruminococcaceae  
TACGTAGGGAGCAAGCGTTGTCCGGAATTTACTGGGTGTAAGGGTGCCTAGGCGGGCTTGAAGTCAAGCGGTGAAATCCC  
GGGGCTTAACCCCGGACTGCGGTAGAAAAGTGTGAGTCTTGGAGTGAAGTAGAGGTAGGCGGAATTCCTGGTGTAGCGGTG  
GAAATGCGTAGAGATCGGAGGAACACCAGTGGCGAAGGCGGCTTACTGGGCTTAACTGACGCTGAGGCGCGAAAGTGTG  
GGTA  
>ASV:2602:Family:Ruminococcaceae



TACGTAGGGAGCAAGCGTTGTCCGGATTTACTGGGTGTAAAGGGTGCCTAGGCGGCTTGGCAAGTCGGGCGTGAAAGCTA  
TGGGCTTAACCCATAAATTGCGTTTCAAACCTGTTGGGCTTGAAGTGAAGTAGAGGTAGGCGGAATTCCTAGTGTAGCGGTG  
AAATGCGTAGAGATCGGGAGGAACACCAGTGGCGAAGGCGGCTTACTGGCTTTAACTGACGCTGAGGCACGAAAGTGTG  
GGTAG

>ASV:2603:Genus:Blautia

TACGTAGGGGGCAAGCGTTATCCGGATTTACTGGGTGTAAAGGGAGCGTAGACGGTGTGCAAGTCTGATGTGAAAGGCG  
GGGGCTCAACCCCTGGACTGCATTGAAACTGTGATACTTGAAGTGCAGGAGAGGTAAGCGGAATTCCTAGTGTAGCGGTG  
AAATGCGTAGATATTAGGAGGAACACCAGTGGCGAAGGCGGCTTACTGGACGTAAGTGAAGTGTAGGCTCGAAAGCGTG  
GGGAG

>ASV:2604:Family:Lachnospiraceae

TACGTAGGGGGCAAGCGTTATCCGGATTTACTGGGTGTAAAGGGAGCGCAGGCGGCATGATAAGTCTGATGTGAAAACCC  
AAGGCTCAACCATGGACTGCATTGAAACTGTGCTGCTGGAGTGTCCGAGAGGTAAGCGGAATTCCTAGTGTAGCGGTG  
AAATGCGTAGATATTAGGAGGAACACCAGTGGCGAAGGCGACTTACTGGACGATGACTGACGCTGAGGCTCGAAAGCGTG  
GGGAG

>ASV:2605:Genus:Clostridium\_sensu\_stricto\_1

TACGTAGGTGGCGAGCGTTGTCCGGATTTACTGGGCGTAAAGGGAGCGTAGGCGGATTTTTAAGTGAAGTGTGAAATACT  
TGGGCTTAACCTGAGTGTGCTTCAAACCTGGAAGTCTAGAGTGCAGGAGAGGAGAAGGGAATTCCTAGTGTAGCGGTG  
AAATGCGTAGAGATTAGGAAGAACACCAGTGGCGAAGGCGCTTCTCTGGACTGTAAGTGAAGTGTAGGCTCGAAAGCGTG  
GGGAG

>ASV:2606:Genus:Bacteroides

TACGGAGGATTCGAGCGTTATCCGGATTTATTGGGTTAAAGGGTGCCTAGGCGGCCTTTAAGTCAAGCGGTGAAAGTCT  
GTGGCTCAACCATAGAATTGCAAGTGAAGTGGCAGTCTTGAAGTACAGTAGAGGTGGCGGAATTCGTGGTGTAGCGGTG  
AAATGCTTAGATATCAGGAAGAACTCCGATTGCGAAGGCGAGTCACTAGACTGTTACTGACACTGATGCTCGAAAGTGTG  
GGTAT

>ASV:2607:Species:turicensis

TACGTAGGGCGCGAGCGTTGTCCGGAATTTATTGGGCGTAAAGGGCTTGTAGGCGGTTGGCCGCTGCTCCGTGAAATCCT  
CTGGCTTAACCTGGGGCGTGCAGTGGTACGGGTTGACTTGAAGTGCAGGAGAGGACTGGAATTCCTGGTGTAGCGGTG  
GAATGCGCAGATATCAGGAGGAACACCAGTGGCGAAGGCGGCTTCTGGGCCGTTACTGACGCTGAGGAGCGAAAGCGTG  
GGGAG

>ASV:2608:Family:Ruminococcaceae

TACGTAGGTGGCGAGCGTTGTCCGGAATTTACTGGGTGTAAAGGGCGTGTAGGCGGCAGATAAGTCAAGTGTGAAATACC  
GGGGCTCAACCCCGGGCTGCATTTGAAACTGTATGTCTTGAAGTGCAGGAGAGGAAAGCGGAATTCCTAGTGTAGCGGTG  
AAATGCGTAGATATTAGGAGGAACACCAGTGGCGAAGGCGGCTTCTGACCGTAACTGACGCTGAGGCGCGAAAGCGTG  
GGGAG

>ASV:2609:Family:Planococcaceae

TACGTAGGTGGCAAGCGTTGTCCGGATTTATTGGGCGTAAAGCGCGCAGGCGGCTTTTTAAGTCTGATGTGAAATCTT  
GCGGCTCAACCCGAGCGTTCATTGGAAACTGGGGACTTGAAGTACAGAGAGGAAAGCGGAATTCACGCTGTAGCGGTG  
AAATGCGTAGATATTAGGAGGAACACCAGTGGCGAAGGCGGCTTCTGGTCTGTAAGTGAAGTGTAGGCTCGAAAGCGTG  
GGGAG

>ASV:2610:Family:Muribaculaceae

TACGGAGGATGCGAGCGTTATCCGGATTTATTGGGTTAAAGGGTGCAGGCGGACTCTCAAGTCAAGCGGTCAAAATCCG  
GGGGCTCAACCCCGGACTTCCGCGTTGAAACTGGGAGCCTTGAAGTGCAGGAGAGGAAAGCGGAATTCCTAGTGTAGCGGTG  
AATGCATAGATATCAGCAGAACTCCGATTGCGAAGGCGACTACCGGCGGCAACTGACGCTCATGCAGAAAGCGTGG  
GTATC

>ASV:2611:Family:Lachnospiraceae

TACGTATGGAGCAAGCGTTATCCGGATTTACTGGGTGTAAAGGGTGCCTAGGTTGGCAGTGAAGTCAAGTCAAGTGTGAAAGGCC  
GGGGCTCAACCCCGGACTGCTTGGAAACTGCTCGGCTAGAGTACAGGAGAGGAGACGGAATTCCTAGTGTAGCGGTG  
AAATGCGTAGATATTAGGAGGAACACCAGTGGCGAAGGCGGCTTACTGGACTGTTACTGACACTGAGGCACGAAAGCGTG  
GGGAG

>ASV:2612:Genus:Lachnospiraceae\_UCG-010

TACGTAGGGGGCAAGCGTTATCCGGAATTTACTGGGTGTAAAGGGAGCGTAGGCGGCACGCCAAGCCAGATGTGAAAGCCC  
GAGGCTTAACCTCGCGGATTGCAATTTGAAACTGGCGAGCTAGAGTACAGCAGAGGAAAGCGGAATTCCTAGTGTAGCGGT  
GAAATGCGTAGATATTAGGAAGAACACCAGTGGCGAAGGCGGCTTCTGGACTGAAACTGACGCTGAGGCTCGAAAGCGTG  
GGGA

>ASV:2613:Family:Lachnospiraceae

TACGTATGGAGCAAGCGTTATCCGGATTTACTGGGTGTAAAGGGTGCCTAGGTTGGCAGTGAAGTCAAGTCAAGTGTGAAAGCCC  
GGGGCTCAACCCCGGACTGCTTGGAAACTGCTGACTAGAGTGTCCGAGGGGTAAGCGGAATTCCTAGCTAGCGGTG  
AAATGCGTAGATATTAGGAGGAACACCAGTGGCGAAGGCGGCTTACTGGACGATAACTGACGCTGAGGCTCGAAAGCGTG  
GGGAG

>ASV:2614:Family:Lachnospiraceae

TACGTAGGGGGCAAGCGTTATCCGGATTTACTGGGTGTAAAGGGAGCGTAGACGGCGAGACAAGTCTGAAGTGAAGGCC  
GGGGCTCAACCCCGGACTGCTTGGAAACTGCTTACTAGAGTGTCCGAGGGGTAAGCGGAATTCCTAGTGTAGCGGTG  
AAATGCGTAGATATTAGGAGGAACACCAGTGGCGAAGGCGGCTTACTGGACGATAACTGACGCTGAGGCTCGAAAGCGTG  
GGGAG

>ASV:2615:Family:Lachnospiraceae

TACGTAGGGGGCAAGCGTTATCCGGATTTACTGGGTGTAAAGGGAGCGTAGACGGCGATGCAAGCCAGATGTGAAAGCCC  
GGGGCTCAACCCCGGACTGCTTGGAAACTGCTGCTAGAGTGTCCGAGAGGAGGAGGCGGAATTCCTAGTGTAGCGGTG  
AAATGCTTAGATATCAGGAAGAACTCCGATTGCGAAGGCGAGCTGCTAAGTGAAGTGAAGTGTAGGCTCGAAAGTGTG

GGTAT

>ASV:2616:Genus:Tyzzerella

TACGTAGGGGGCAAGCGTTATCCGGAATTACTGGGTGTAAGGGGAGAGTAGCGGCATGGTAAGTTAGATGTGAAAACCTCGGGCTTAACCTGAGGATTGCATTTAAAACATCAAGCTAGAGTACAGGAGAGGAAAGCGGAATTCCTAGTGTAGCGGTGAAATGCGTAGATATTAGGAAGAACCAGTGGCGAAGGCGGCTTTCTGGACTGAAACTGACGCTGAGGCTCGAAAGCGTGGGAG

>ASV:2617:Genus:GCA-900066225

TACGTAGGTGGCAAGCGTTGTCCGGAATTACTGGGTGTAAGGGGAGCGTAGCGGGAAGGCAAGTTGATTGTCTAAACTATCGGCTCAACCGATAGTCGCGATCAAACACTCTTTCTTGTAGTGAAGTAGAGGTAAGCGGAATTCCTAGTGTAGCGGTGAATGCGTAAATATTAGGAGGAACCAGTGGCGAAGGCGGCTTACTGGGCTTAACTGACGCTGAGGCTCGAAAGCGTGGTAGC

>ASV:2618:Genus:Oscillospira

TACGTAGGTGGCAAGCGTTGTCCGGAATTACTGGGTGTAAGGGGCGTAGCGGGAAGACAAGTCAGATGTGAAATCTGGAGGCTCAACCTCAAACCTGCATTTGAAACTGTTTTCTTGTAGTATCGGAGAGGTAACCGGAATTCCTAGTGTAGCGGTGAAATGCGTAGATATTAGGAAGAACCAGTGGCGAAGGCGGTTACTGGACGACAACGACGCTGAGGCGCGAAAGCGTGGGAG

>ASV:2619:Species:appendicis

TACGTAGGGTGGCAGCGTTGTCCGGAATTACTGGGCTAAAGAGCTCGTAGGTGGTTTGTCCGCTCGTTTGTGGAATACCGCAGCTTAACTGCGGGTTCAGGCGATACGGGCATAACTTGTAGTGTGTAGGGGAGACTGGAATTCCTGGTGTAGCGGTGGAATGCGCAGATATCAGGAGGAACCAGTGGCGAAGGCGAGTCTCTGGGCAGTAACTGACGCTGAGGAGCGAAAGCATGGGTA

>ASV:2620:Genus:Candidatus\_Stoquefichus

TACGTAGGTGGCAGCGTTATCCGGAATCATTGGGCGTAAAGAGGGAGCAGGCGGCAGTAAAGTCTGCGGTGAAAGCCCGGGCTAAACCCCGGTAAGCCGTGGAACCGAACAGCTAGAGTGCAGTAGAGGATCGTGAATTCATGTGTAGCGGTGAATGCGTAGATATTAGGAGGAACCAGTGGCGAAGGCGACGATCTGGGCTGCAACTGACGCTCAGTCCGAAAGCGTGGGAGC

>ASV:2621:Genus:Ruminococcaceae\_UCG-013

TACGTAGGTGACAAGCGTTGTCCGGAATTTACTGGGTGTAAGGGGCGGTAGGTGGACTGTCAAGTCAGTGTGAAATACCGGGCTTAAACCCGGGCTGCGATTGAAACTGACAGCCTTGTAGTATCGGAGAGGAAAGCGGAATTCCTAGTGTAGCGGTGAAATGCGTAGATATTAGGAGGAACCAGTGGCGAAGGCGGCTTTCTGGACGACAACGACGCTGAGGCGCGAAAGTGTGGGAG

>ASV:2622:Genus:Family\_XIII\_AD3011\_group

TACGTAGGGGGCAGCGTTATCCGGAATTTATTGGGCGTAAAGAGTACGTAGGTGGTTTCTAAGCACAGGGTTAAAGGCTAAGGCTCAACCATAGTTCGCCCTGTGAACTGGGAGACTTGTAGTGCAGGAGAGGAAAGCGGAATTCCTAGTGTAGCGGTGAATGCGTAGATATTAGGAGGAACCAGTGGCGAAGGCGGCTTTCTGGACTGTAAGTACACTGAGGTACGAAAGCGTGGGAGC

>ASV:2623:Species:marinus/muralis/versicolor

TACGTAGGGTGGCAAGCGTTGTCCGGAATTTATTGGGCGTAAAGAGCTCGTAGGCGGTCTGTACGCTCGGCTGTGAAAACCCGAGGCTCAACCTCGGGCTGCAGTCGATACGGGCAAACTAGAGTACTGCAGGGGAGACTGGAATTCCTGGTGTAGCGGTGAAATGCGCAGATATCAGGAGGAACCAGTGGCGAAGGCGGCTTCTGGGCAGTAACTGACGCTGAGGAGCGAAAGCGTGGGAG

>ASV:2624:Family:Lachnospiraceae

TACGTAGGGGGCAAGCGTTATCCGGAATTTACTGGGTGTAAGGGGAGCGTAGACGGTTATGCAAGTCTGATGTGAAAACCCGGGGCTCAACCCGGGACTGCATTGAAACTGTGTAAGTGTGCGGAGAGGTAAGTGAATTCCTAGTGTAGCGGTGAAATGCGTAGATATTAGGAGGAACCAGTGGCGAAGGCGGCTTACTGGACGATGACTGACGTTGAGGCTCGAAAGCGTGGGAG

>ASV:2625:Genus:Fusicatenibacter

TACGTAGGGGGCAAGCGTTATCCGGAATTTACTGGGTGTAAGGGGAGCGTAGACGGCAAGCAAGTCTGGTGTGAAAACCCGGGGCTCAACCCGGGCTGCATTGAAACTGTTTTGCTCGAGTGCAGGAGGTAAGCGGAATTCCTAGTGTAGCGGTGAAATGCGTAGATATTAGGAGGAACCAGTGGCGAAGGCGGCTTACTGGACGTAAGTACGCTGAGGCTCGAAAGCGTGGGAG

>ASV:2626:Genus:Fusicatenibacter

TACGTATGGTGGCAAGCGTTATCCGGAATTTACTGGGTGTAAGGGGAGCGTAGACGGCAAGGCAAGTCTGATGTGAAAACCCAGGGCTTAAACCTGGGACTGCATTGAAACTGTCTGGCTCGAGTGCAGGAGGTAAGCGGAATTCCTAGTGTAGCGGTGAAATGCGTAGATATTAGGAGGAACCAGTGGCGAAGGCGGCTGCTGGGCTTAACTGACGCTGAGGCACGAAAGCGTGGTAG

>ASV:2627:Genus:Parabacteroides

TACGGAGGATTCAAGCGTTATCCGGAATTTATTGGGTTTAAAGGGTGCAGTGGCGGCTTTTAAAGTCAGCGGTGAAAGTCTGTGGCTCAACCATAGATTGCCGTTGAAACTGGGGGCTTGTAGTATGTTTGTAGGAGGCGGAATGCGTGGTGTAGCGGTGAAATGCGTAGATATCAGGAAGAACTCCGATTGCGAAGGCGAGTCACTGGACTGCAACTGACACTGATGCTCGAAAGTGTGGTAT

>ASV:2628:Family:Ruminococcaceae

TACGTAGGTGGCAAGCGTTGTCCGGAATTACTGGGTGTAAGGGGAGCGTAGCGGGAATCAAGTTGAATGTGAAAACCTATGGGCTCAACCCATAGTTGCGTTCAAACCTGTGTTTCTTGTAGTGAAGTAGAGGTAAGCGGAATTCCTAGTGTAGCGGTGAATGCGTAAATATTAGGAGGAACCAGTGGCGAAGGCGGCTTACTGGGCTTAACTGACGCTGAGGCTCGAAAGCGTGGTAGC

>ASV:2629:Genus:Tyzzerella\_4

TACGTATGGTGGCAAGCGTTATCCGGAATTTACTGGGTGTAAGGGGAGCGTAGACGGTTGTGAAGTCTGATGTGAAAGCCC

GGGGCTCAACCCGGGACTGCATTGGAACTATGTAAGTACTAGAGTGTCGGAGAGGTAAGCGGAATTCCTAGTGTAGCGGTG  
AAATGCGTAGATATTAGGAGGAACACCAGTGGCGAAGGCGGCTTACTGGACGATTACTGACGTTGAGGCTCGAAAGCGTG  
GGGAG

>ASV:2630:Genus:Acetanaerobacterium

TACGTAGGGAGCAAGCGTTGTCCGGAATTACTGGGTGTAAGGGAGCGTAGGCGGGTCTCAAGTTGAATGTGAAATGCA  
GAGGCTCAACCTCTGACATGCGTTCAAAGTACTGATCTTGAAGTGAAGTAGAGGCAGCGGAATTCCTAGTGTAGCGGTG  
AAATGCGTAGATATCGGAGGAACACCAGTGGCGAAGGCGGCTTACTGGGCTTTTACTGACGCTGATGCTCGAAAGCATG  
GGTAG

>ASV:2631:Family:Lachnospiraceae

TACGTAGGGGGCAAGCGTTATCCGGATTTACTGGGTGTAAGGGAGCGTAGACGGCAAGGCAAGTCTGAAGTAAAAGCCC  
GGGGCTCAACCCGGGACTGCTTTGGAACTGCTGGCTGGAGTGCCGGAGAGGTAAGCGGAATTCCTAGTGTAGCGGTG  
AAATGCGTAGATATTAGGAGGAACACCAGTGGCGAAGGCGGCTTACTGGACGTAACGACGTTGAGGCTCGAAAGCGTG  
GGGAG

>ASV:2632:Genus:Lachnoclostridium

TACGTAGGGGGCAAGCGTTATCCGGATTTACTGGGTGTAAGGGAGCGTAGACGGAGAGGCAAGTCTGGAGTAAAACCC  
GGGGCTCAACCCGGGACTGCTTTGGAACTGTTTTTCTAGAGTGTCGGAGAGGTAAGTGAATTCCTAGTGTAGCGGTG  
AAATGCGTAGATATTAGGAGGAACACCAGTGGCGAAGGCGGCTTACTGGACGATGACTGACGTTGAGGCTCGAAAGCGTG  
GGGAG

>ASV:2633:Genus:Desulfovibrio

TACGGAGGGTCAAGCGTTAATCGGAATCACTGGGCGTAAAGCGCACGTAGGCTGTTATGTAAGTCAGGGGTGAAATCCC  
ACGGCTCAACCGTGAAGTGCCTTGTACTGCACGACTTGAATCCAGGAGAGGGTGGCGGAATTCAGGTGTAGGAGTG  
AAATCGTAGATATCTGGAGGAACATCAGTGGCGAAGGCGCCACCTGGACCGGATTGACGCTGAGGTGCGAAAGCGTG  
GGGAG

>ASV:2634:Genus:Subdoligranulum

AACGTTGGGTGCAAGCGTTGTCCGGAATTACTGGGTGTAAGGGAGCGCAGGCGGACCGGAAGTTGGAAGTAAAACCTA  
TGGGCTCAACCCATAAATTGCTTTCAAAGTACTGCTGGCCTTGAAGTGTGACAGAGGTAGGTGGAATTCCTAGTGTAGCGGTG  
GAATGCGTGGATATCGGAGGAACACCAGTGGCGAAGGCGACCTACTGGCACCAACTGACGCTGAGGCTCGAAAGCATG  
GGTAG

>ASV:2635:Genus:Porphyromonas

TACGGAGGATACGAGCGTTATCCGGAAATTTATGGGTTAAAGGGTGCCTAGGTGGCTATTTAAGTCAGGGGTGAAAAGCA  
TGAGCTCAACTCATGCTTGCCTTTGAAACTGGAGAGCTAGAGAAAAGACGAGGTATGTGGAATGTGTGGTGTAGCGGTG  
AAATGCATAGATATCACACAGAATCCGATTGCGCAGGCAGCTACCAGACTTCTTCTGACACTGAAGCACGAAAGCGTG  
GGGAT

>ASV:2636:Family:Ruminococcaceae

TACGTAGGTGGCAAGCGTTGTCCGGAATTACTGGGTGTAAGGGAGCGTAGGCGGGAAGGCAAGTCAGATGTGAAATCCA  
CAGGCTTAACCTGTGGCGTGCATTTGAAACTGTTTTCTTGAAGTGAAGTAGAGGCAGCGGAATTCAGGTGTAGCGGTG  
AAATGCGTAGATATTCGGAGGAACACCAGTGGCGAAGGCGGCTTACTGGGCTTTTACTGACGCTGAGGCTCGAAAGCATG  
GGTAG

>ASV:2637:Genus:Ruminococcaceae\_UCG-014

TACGTAGGGAGCGAGCGTTATCCGGATTTATTGGGTGTAAGGGTGCCTAGACGGGAAATTAAGTTAGTTGTGAAATCCC  
ACGGCTCAACTGTGGAAGTGAAGTAAACTGATTTTCTTGAAGTACTGGAGAGGAAAGTGAATTCCTAGTGTAGCGGTG  
AAATGCGTAGATATTAGGAGGAACACCAGTGGCGAAGGCGACTTTCTGGACAGAAACTGACGTTGAGGCACGAAAGTGTG  
GGGAG

>ASV:2638:Genus:Prevotella\_9

TACGGAGGATCCGAGCGTTATCCGGATTTATTGGGTTAAAGGGAGCGTAGGCGGAGATTAAGCGTGTGTGAAATGTA  
GATGCTCAACATCTGCACTGCAGCGCAACTGGTTTCTTGAAGTACGCATAAAGTGGCGGGAATTCGTGGTGTAGCGGTG  
AAATGCTTAGATATCACGAAGAATCCGATTGCGAAGGCAGCTTCTGACTGTAACGACGCTGATGCTCGAAAGTGTG  
GGTAT

>ASV:2639:Genus:Anaerostipes

AACGTAGGGTCAAGCGCTATCCGGATTTACTGGGTGTAAGGGAGCGTAGACGGCAAGGCAAGTCTGATGTGAAACCCA  
GGGCTTAACCTGGGACTGCTTTTGAAGTGTGAGTACTGAGTGCAGGAGAGGTAAGCGGAATTCCTAGTGTAGCGGTG  
AAATGCGTAGATATTAGGAGGAACATCAGTGGCGAAGGCGGCTTACTGGACTGAAACTGACACTGAGGCACGAAAGCGTGG  
GGAG

>ASV:2640:Genus:Catenibacterium

AACGTAGGTGGCAGCGTTATCCGGAAATCATTGGGCGTAAAGAGGGAGCAGGCGGCCGCAAGGGTCTGTGGTGAAGACC  
GAAGCTAAACTTCGGTAAGCCATGGAACCCGGGCGGCTAGAGTGCAGGAGAGGATCGTGAATTCATGTGTAGCGGTG  
AAATGCTTAGATATCACGAAGAATCCGATTGCGAAGGCAGCTCACTGGAGTGTAACTGACGCTGAAGCTCGAAAGTGGCG  
GTATC

>ASV:2641:Genus:Prevotella\_6

TACGGAAGGTCCGGCGTTATCCGGATTTATTGGGTTAAAGGGAGCGTAGGCGGCTTTTAAAGCGTGTGTGAAATGTA  
GGCGCCAACGTCTGCATCGCAGCGCAACTGGAACGCTTGAAGTACGCGCAACGTTGGCGGAATTCGTGCTGAGCGGTG  
AAATGCTTAGATATGACGAGGAATCCGATTGCGAAGGCAGCTGACGGGAGCGGCACTGACGCTTAAAGCTCGAAAGTGGCG  
GGTAT

>ASV:2642:Family:Ruminococcaceae

TACGTAGGTGGCAAGCGTTGTCCGGAATTACTGGGTGTAAGGGAGCGTAGGCGGACTTTAAGTCAGATGTGAAATACC  
CGGGCTTAACCTCGGGAGGTGCATTTGAAACTGAGTTCTTGAAGTGCAGGAGAGGAAAGCGGAATTCCTAGTGTAGCGGTG  
AAATGCGTAGATATTAGGAGGAACACCAGTGGCGAAGGCGGCTTCTGGACTGTAACGACGCTGAGGCGGCAAGCGGTG  
GGGAG

>ASV:2643:Genus:Achromobacter  
TACGTAGGGTCAACGCGTTAATCGGAATTACTGGGCGTAAAGCGTGCAGGCGGTTTCGAAAGAAAGATGTGAAATCCC  
AGAGCTTAACCTTGGAACTGCATTTTTAACTACCGGGCTAGAGTGTGTGAGAGGAGGTGGAATTCGCGGTGAGCAGTG  
AAATGCGTAGATATGCGGAGGAACACCCAGTGGCGAAGGCAGCTCCTGGGATAACACTGACGCTCATGCACGAAAGCGTG  
GGGAG

>ASV:2644:Genus:Lachnospiraceae\_UCG-004  
TACGTAGGGGGCAACGCGTTATCCGGATTTACTGGGTGTAAAGGGAGCGTAGACGGCGATGCAAGTCTGAAGTGAATACC  
CGGGCTCAACCCGAACTGCTTTGAAACTGTGTTGCTGGAGTGTGGAGAGGTAAGCGGAATTCCTAGTGTAGCGGTG  
AAATGCGTAGATATTAGGAAGAACACCCAGTGGCGAAGGCGGCTTACTGGACAGTAAGTACGCTTGGAGGCTCGAAAGCGTG  
GGGAG

>ASV:2645:Genus:Faecalibacterium  
ACCTTCTTCCCTCTTTTTCTTCTCTGGGTGTAAAGGGAGCGCAGGCGGGAAGACAAGTTGGAAGTGAATCTA  
TGGGCTCAACCCATAAATGCAATTTCAAACCTGTTTTCTTGGTGTAAAGGGAGCGTAGAGGTAGGCGGAATTCGCGGTGTAGCGGTG  
GAATGCGTAGATATCGGAGGAACACCCAGTGGCGAAGGCGGCTACTGGGCACCAACTGACGCTGAGGCTCGAAAGTGTG  
GGTAG

>ASV:2646:Order:Bacteroidales  
TACGGAGGATCCGAGCGTTATCCGGATTTATTGGGTTTAAAGGGAGCGTAGATGGGTTGTTAAGTCAGCTGTGAAAGTTT  
GCGGCTCAACCCGAACTGCTTTCAAACCTGCTGGTCTTGGAGTGTGAGGTAGGCGGAATTCGCGGTGTAGCGGTG  
AAATGCGTAGATATTAGGAAGAACACCCAGTGGCGAAGGCGGCTTCTGGACTGAAACTGACGCTGAGGCTCGAAAGCGTG  
GGGAG

>ASV:2647:Family:Ruminococcaceae  
TACGTAGGGAGCGAGCGTTGTCGGAACTACTGGGTGTAAAGGGTGCCTAGGCGGGCTGCAAGTCAGCCGTGAAATCCC  
GGGGCTTAACCCGAGGACTGCGGTTGAAACTGTGGGCTTGGAGTGAAGTAGAGGTAGGCGGAATTCGCGGTGTAGCGGT  
GAAATGCGTAGATATCGGAGGAACACCCAGTGGCGAAGGCGGCTACTGGGCTTAACTGACGCTGAGGCACGAAAGTGT  
GGTA

>ASV:2648:Genus:Butyricicoccus  
TACGTAGGGAGCAAGCGTTATCCGGATTTACTGGGTGTAAAGGGCGCAGGCGGGCCGTTAAGTTGGAAGTGAATCTA  
TGGGCTTAACCCGAACTGCTTTCAAACCTGCTGGTCTTGGAGTGTGGAGAGGCAGGCGGAATTCGCGGTGTAGCGGTG  
AAATGCGTAGATATACGAGGAACACCCAGTGGCGAAGGCGGCTGCTGGACATTAAGTACGCTGAGGCGGAAAGCGTG  
GGGAG

>ASV:2649:Genus:Lachnospiraceae\_NC2004\_group  
TACGTATGGAGCAAGCGTTATCCGGATTTACTGGGTGTAAAGGGTGCCTAGGTGGCAGGGCAAGTCAGATGTGAAAGACC  
GGGGCTCAACCCGAGGCTGCAATTTGAAACTGCTTTGCTGGAGTGCAGGAGAGGCAGGCGGAATTCCTAGTGTAGCGGTG  
AAATGCGTAGATATTAGGAGGAACACCCAGTGGCGAAGGCGGCTGCTGGACTGATACTGACACTGAGGCACGAAAGCGTG  
GGGAG

>ASV:2650:Genus:Alistipes  
TACGGAGGATCCGAGCGTTATCCGGATTTATTGGGTTTAAAGGGAGCGTAGGCGGTTTGATAAGTTAGAGGTGAAATTTCC  
GGGGCTCAACCCGAACTGCTTTGAAACTGCTTTGCTGGAGTGCAGGAGAGGCAGGCGGAATTCCTAGTGTAGCGGTG  
AAATGCGTAGATATTAGGAGGAACACCCAGTGGCGAAGGCGGCTTCTGGACGACAAGTACGCTGAGGCGGAAAGCCAG  
GGGAG

>ASV:2651:Family:Lachnospiraceae  
TACGTATGGTGCAGCGTTATCCGGATTTACTGGGTGTAAAGGGAGCGTAGACGGATGGGCAAGTCTGAAGTGAAGGCC  
GGGGCTCAACCCGAGGACTGCTTTGAAACTGCTTCACTGGAGTGTGGAGAGGTAAGTGAATTCCTAGTGTAGCGGTG  
AAATGCGTAGATATTAGGAGGAACACCCAGTGGCGAAGGCGGCTTACTGGACAGTAAGTACGCTTGGAGGCTCGAAAGCGTG  
GGGAG

>ASV:2652:Species:iHumii  
TACGGAAGGTCCAGGCGTTATCCGGATTTATTGGGTTTAAAGGGAGTGTAGGCGGTTTTTAAAGCGTGTGTGAAATGTA  
GATGCTCAACATCTGAATTGCAGCGCAACTGGAAGACTTGAAGTGCACACAACGTAGGCGGAATTCATGGTGTAGCGGTG  
AAATGCTTAGATATTGAAGAACTCCGATTGCGAAGGCAGCTTACGGGAGTGAAGTACGCTTAAAGTCAAGGTTGCG  
GGTAT

>ASV:2653:Species:aquatilis/faecalis  
TACGTAGGGTCAACGCGTTAATCGGAATTACTGGGCGTAAAGCGTGTGTAGGCGGTTTCGAAAGAAAGATGTGAAATCCC  
AGGGCTCAACCTTGAAGTGCATTTTTAACTGCCGAGCTAGAGTATGTGAGAGGGGGTAGAATTCACGCTGTAGCAGTG  
AAATGCGTAGATATGTGGAGGAATACCGATGGCGAAGGCAGCCCCCTGGGATAATACTGACGCTCAGACACGAAAGCGTG  
GGGAG

>ASV:2654:Family:Lachnospiraceae  
TACGGAGGATCCGAGCGTTATCCGGATTTACTGGGTGTAAAGGGAGCGTAGACGGCATGGCAAGCCAGATGTGAAAGGCC  
GGGGCTCAACCCGAGGACTGCAATTTGAAATGTCAGGCTAGAGTGTGGAGAGGAAAGCGGAATTCCTAGTGTAGCGGTG  
AAATGCGTAGATATCAGGAAGAACTCCGATTGCGAAGGCAGCTTCTGGACTGTAAGTACGCTGATGCTCGAAAGTGTG  
GGTAT

>ASV:2655:Genus:Family\_XIII\_AD3011\_group  
TACGTAGGGGGCAGCGTTATCCGGAAATTTGGGCGTAAAGAGTGCCTAGGCGGTTTTTAAAGCGGGGGTGAAGGGCA  
GTGGCTTAACCACTGTAGCCCTGCGAACTGGGAGACTTGAAGTGCAGGAGAGGAAAGCGGAATTCCTAGTGTAGCGGTG  
AATGCGTAGATATTAGGAGGAACACCCAGTGGCGAAGGCGGCTTCTGGACTGTAAGTACGCTGAGGCGGAAAGTGTG  
GGAGC

>ASV:2656:Genus:Butyricimonas  
TACGGAGGATCCGAGCGTTATCCGGATTTATTGGGTTTAAAGGGAGCGTGGGCGGTTGTTAAGTCAGTTGTGAAAGTTT  
GCGGCTCAACCGTAAATGCAAGTGTACTGGGACCTTGGAGTGCACAGAGGTAGGCGGAACAAGTGAAGTGTAGCGGTG

AAATGCATAGATATCACTTGAACCCCGATAGCGAAGGCAGCTTCCCAGGCTCGATCTGACGCTGATGCGCGAGAGCGTG  
GGTAG  
>ASV:2657:Genus:Coprococcus\_3  
TACGTATGGTGCAAGCGTTATCCGGATTTACTGGGTGTAAGGGAGCGTAGACGGCTGTGTAAGTCTGAAGTAAAAGCCC  
GGGGCTCAACCCGGGACTGCTTTGAAAATATGCAGCTAGAGTGTCCGGAGAGGCAAGTGAATTCCCAGTGTAGCGGTG  
AAATGCGTAGATATTGGGAGGAACACCAGTGGCGAAGGCGGCTTCTGGACGATGACTGACGTTGAGGCTCGAAAAGCGTG  
GGGAG  
>ASV:2658:Order:Bacteroidales  
TACGGAGGATCCGAGCGTTATCCGGATTTACTGGGTTAAAGGGTGCCTAGGCGGCCTTTAAGTCAAGCGGTGAAAAGTCT  
GTGGCTCAACCATAGAATTGCCGTTGAAACTGGGAGGCTTGGATGTTTGGAGGAGCGGAATGCGTGGTGTAGCGGTG  
GAATGCGTAGATATCGGGAGGAACACCAGTGGCGAAGGCGGCTACTGGGCACCAACTGACGCTGAGGCTCGAAAAGCATG  
GGTAT  
>ASV:2659:Genus:Novosphingobium  
TACGGAGGGAGCTAGCGTTGTTCCGAACTTACTGGGCGTAAAGCGCACGTAGGCGGCTACTCAAGTCCGGGGTAAAAGCCC  
GGGGCTCAACCCGGAAGTCCCTCGAACTAGGTAGCTAGAATCTGGAGAGGTGAGTGAATTCCGAGTGTAGAGGTG  
AAATTCGTAGATATTGGAAGAACACCAGTGGCGAAGGCGACTGACTGGACAAGTATTGACGCTGAGGTGCGAAAAGCGTG  
GGGAG  
>ASV:2660:Genus:Roseburia  
TACGTAGGGGGCAAGCGTTATCCGGATTTACTGGGCGTAAAGGGAGCGCAGGCGGCACGGCAAGTCTGGTGTGAAAACCC  
GGGGCTCAACCCGGGACTGCATTGAAAAGTCCGGGCTGGAGTGTCCGGAGGGTAAGCGGAATTCCTAGTGTAGCGGTG  
AAATGCGTAGATATTAGGAGGAACACCAGTGGCGAAGGCGGCTTACTGGACGATGACTGACGCTGAGGCTCGAAAAGCGTG  
GGGAG  
>ASV:2661:Genus:Tyzzerella  
TACGTAGGGGGCAAGCGTTATCCGAACTTACTGGGTGTAAGGGTGGAGTAGGCGGCATGGTAAGTTAGATGTGAAAAGCCC  
GGGGCTTAACCCGGGATTGCATTTAAAAGTATCAAGCTCGAGTTCAGGAGAGGTAAGCGGAATTCCTAGTGTAGCGGTG  
AAATGCGTAGATATTAGGAGGAACACCAGTGGCGAAGGCGGCTTACTGGACTGATACTGACGCTGAGGCACGAAAAGCGTG  
GGGAG  
>ASV:2662:Species:uris  
TACGTAGGGGGCAGCGTTATCCGGATTTACTGGGCGTAAAGCGCGCTAGGCGGCCCTAAGCGGGACCTCTAACCCC  
GGGGCTCAACCCGGGCGGGTCCCGACTGGGCGGCTCGAGTGCAGTAGAGGAGAGCGGAATTCCTGGTGTAGCGGTGG  
AATGCGCAGATATCGGGAAGAACACCAGTGGCGAAGGCGAGCTCTCTGGCCGCTACTGACGCTGAGGCGGAAAAGCTGGG  
GGAGC  
>ASV:2663:Species:citreum/mesenteroides/pseudomesenteroides  
TACGTATGTCCCAGCGTTATCCGGATTTACTGGGCGTAAAGCGAGCGCAGCGGTTTATTAAGTCTGATGTGAAAAGCCC  
GGAGCTCAACCCGGAATGGCATTGAAAAGTGGTAACTTGGAGTGCAGTAGAGGTAAGTGAAGTCCATGTGTAGCGGTG  
GAATGCGTAGATATATGGAAGAACACCAGTGGCGAAGGCGGCTTACTGGACTGCAACTGACGTTGAGGCTCGAAAAGTGTG  
GGTAG  
>ASV:2664:Genus:Butyricicoccus  
TACGTAGGGGCAAGCGTTATCCGGATTTACTGGGTGTAAGGGCGCGCAGGCGGGCCGCAAGTTGGAAGTGAATCTA  
TGGGCTTAACCCATAAAGTCTTTCAAAGTCTGGTCTTGGAGTGGAGAGGCGAGCGGAATTCCTGTGTAGCGGTG  
AAATGCGTAGATATACGGAGGAACACCAGTGGCGAAGGCGGCTTCTGGACATTAAGTACGCTGAGGCGGAAAAGCGTG  
GGGAG  
>ASV:2665:Family:Lachnospiraceae  
TACGTAGGGGGCAAGCGTTATCCGGATTTACTGGGTGTAAGGGAGCGTAGACGGACTGGCAAGTCTGATGTGAAAAGGCG  
GGGGCTCAACCCCTGGACTGCATTGAAAAGTGTAGTCTTGGAGTGGCGGAGAGGTAAGCGGAATTCCTAGTGTAGCGGTG  
AGATGCTTAGATACCACGAAGAAGTCCGATTGCGAAGGCGAGCTACTGGACTGCAACTGACACTGATGCTCGAAAAGTGTG  
GGTAT  
>ASV:2666:Family:Family\_XIII  
TACGTAGGGGGCAGCGTTATCCGGAATTTACTGGGCGTAAAGAGTGCCTAGGTGGCTTTTAAAGCGGGGTTAAGGCA  
ATGGCTTAACCATTTGTTCCGCTGCGAACTGGAGAGCTTGGAGTGCAGGAGAGGAAAAGCGGAATTCCTAGTGTAGCGGTG  
AATGCGTGGATATTAGGAGGAACACCAGTGGCGAAGGCGGATTGCTGGACGACAAGTACGCTGAGGCGGAAAAGCGGTG  
GGAGC  
>ASV:2667:Genus:Subdoligranulum  
AACGTAGGGTGCAAGCGTTGTCGGAATTTACTGGGTGTAAGGGAGCGCAGGCGGACCAGGCAAGTTGGAAGTAAAAGTAA  
TGGGCTCAACCCATAAATGCTTTCAAAGTCTGGCCTTGGAGTGCAGAGGTAGGTGGAATTCCTGGTGTAGCGGTG  
GAATGCGTAGATATCGGGAGGAACACCAGTGGCGAAGGCGACTACTGGGCACCAACTGACGCTGAGGCTCGAAAAGCATG  
GGTAG  
>ASV:2668:Genus:Intestinimonas  
TACGTAGGGGCAAGCGTTATCCGGATTTACTGGGTGTAAGGGCGTGTAGGCGGGATGGCAAGTCAAGTGTGAAAATTA  
TGGGCTCAACCCATAAAGTGCATTTGAAAGTGTGTTCTTGGAGTGGAGAGGCAAGCGGAATTCCTGTGTAGCGGTG  
AAATGCGTAGATATACGGAGGAACACCAGTGGCGAAGGCGGCTTCTGGACATTAAGTACGCTGAGGCGGAAAAGCGTG  
GGGAG  
>ASV:2669:Genus:Christensenellaceae\_R-7\_group  
TACGTAGGGGGCAGCGTTGTCGGAATGACTGGGCGTAAAGGGCGCTAGGCGGCCTGATAAGTCTGGAGTAAAAGTCC  
TGCTTCAAGTGGGAATGCTTTGGAGACTGTCGGGCTTGGAGTGGGAAAGAGGTAAGTGAATTCCTAGTGTAGCGGTG  
AAATGCGTAGAGATTGGAAGAACACCAGTGGCGAAGGCGACTACTGGGCCCTAAGTACGCTGATGCGGAAAAGCGTG  
GGGAG  
>ASV:2670:Genus:Christensenellaceae\_R-7\_group

TACGTAGGGGGCGAGCGTTGTCCGGAATGACTGGGCGTAAAGGGCGTGTAGGCGGCTTTTAAAGTCTGGAGTGAAAGCCC  
CATTTTCAAGGTGGGGACTGCTTTGGAGACTGGAGAGCTTAGTGCGGAAGAGGCAAGTGGAATCCAGTGTAGCGGTG  
AAATGCGTAGAGATTGGGAGGAACACCAGTGGCGAAGGCGACTTGTGGGCCGTAACGACGCTGAGGCGCGAAAGCGTG  
GGGAG  
>ASV:2671:Genus:Acinetobacter  
TACAGAGGGTGCAGCGTTAATCCGGATTTACTGGGCGTAAAGCGCGCTAGGCGGCTTTTAAAGTCCGATGTGAAATCCC  
CGAGCTTAACTTGGGAATTGCATTGATACTGGGAAGCTAGAGTATGGGAGAGGATGGTAGAATCCAGGTGTAGCGGTG  
AAATGCGTAGAGATCTGGAGGAATACCGATGGCGAAGGCGAGCCATCTGGCCATAACTGACGCTGAGGTACGAAAGCATG  
GGGAG  
>ASV:2672:Family:Muribaculaceae  
TACGGAGGATGCAGCGTTATCCGGATTTATTGGGTTTAAAGGGTGCAGGCGGAGGTGCAAGTACAGCGGTCAAATTC  
GGGGCTCAACCCCGTGCAGCGTTGAAACTGCATCCCTTGTAGTGCCGAGAAGTATGCGGAATGCGTGGTGTAGCGGTG  
AATGCATAGATATCACGAGAATCCGATTGCGAAGGCGAGCATAACCGCGCGCAACTGACGCTCATGCACGAAAGCGTGG  
GTATC  
>ASV:2673:Family:Lachnospiraceae  
TACGTAGGGGGCAAGCGTTATCCGGATTTACTGGGTGTAAAGGGAGCGTAGACGCGCAGCAAGTCTGATGTGAAAGGCA  
GGGGCTTAAACCCCTGGACTGCATTGAAACTGCTGTGCTTGTAGTGCCGGAGGGGTAAGCGGAATCCTAGTGTAGCGGTG  
AAATGCGTAGATATCACGAAGAATCCGATTGTGAAGGCGAGTCACTGGACTGCAACTGACACTGATGCTCGAAAGTGTG  
GGTAT  
>ASV:2674:Family:Lachnospiraceae  
TACGTAGGGGGCAAGCGTTATCCGGATTTACTGGGTGTAAAGGGAGCGTAGGCGGTCTGGCAAGCCAGAAGTGAAAGCCC  
GGGGCTTAAACCCCGGACTGCTTTTGAAGTGTAGACTAGAGTGTGCGGAGAGGTAAGTGGAAATCCTAGTGTAGCGGTG  
AAATGCATAGATATTAGGAGGAACACCAGTGGCGAAGGCGGCTTACTGGACGATAACTGACGCTGAGGCTCGAAAGCGTG  
GGGAG  
>ASV:2675:Family:Pasteurellaceae  
TACGGAGGGTGCAGCGTTAATCCGGAATAACTGGGCGTAAAGGGCACGAGGCGGACTTTTAAAGTGGAGTGTGAAATCCC  
CGGGCTTAACTGGGAATTGCATTTGAGACTGGGAGTCTAGAGTACTTTAGGGAGGGGTAAGTGGAAATCCACGTGTAGCGGTG  
AAATGCGTAGAGATTGGGAGGAATACCGAAGGCGAAGGCGAGCCCTTGGGAATGTACTGACGCTCATGTGCGAAAGCGTG  
GGGAG  
>ASV:2676:Genus:Christensenellaceae\_R-7\_group  
TACGTAGGGGGCAAGCGTTGTCCGGAATGACTGGGCGTAAAGGGCGTGTAGGCGGCCGATTAAGTGTGGAGTGAAAGTCC  
ACTTTTCAAGGTGGAATTGCTTTGCAAGTGTGGCTTGTAGTGCGGAAGAGGTAAGTGGAAATCCAGTGTAGCGGTG  
AAATGCGTAGAGATTGGGAGGAACACCAGTGGCGAAGGCGACTTACTGGGCGTAACGACGCTGAGGCGCGAAAGCGTG  
GGGAG  
>ASV:2677:Genus:Bacteroides  
TACGGAGGATCCGAGCGTTATCCGGATTTATTGGGTTTAAAGGGAGCGTAGGTGGATTGTTAAGTCAAGTGTGAAAGTTT  
GCGGCTTAAACCGTAAACTGCTTTTCAAACTGTTTCTTGGATTGAGTACAGTAGAGGTGGGCGGAATTCGTGGTGTAGCGGTG  
AAATGCTTAGATATCACGAAGAATCCGATTGCGAAGGCGAGTCACTGGAGCGCAACTGACGCTGAAGCTCGAAAGTGGC  
GGTAT  
>ASV:2678:Genus:GCA-900066225  
TACGTAGGTGGCAAGCGTTGTCCGGAATTTACTGGGTGTAAAGGGAGCGTAGGCGGGAAGGCAAGTTGGAAGTGAATGTA  
TGGGCTTAAACCCATAAACTGCTTTTCAAACTGTTTCTTGGATTGCGGAGAGGTAAGTGGAAATCCAGTGTAGCGGTG  
AAATGCGTAAATATTAGGAGGAACACCAGTGGCGAAGGCGGCTTACTGGGCTTAACTGACGCTGAGGCTCGAAAGCGTG  
GGTAG  
>ASV:2679:Genus:GCA-900066575  
TACGTAGGGGGCAAGCGTTATCCGGATTTACTGGGTGTAAAGGGAGCGTAGGCGGCGATGCAAGTCAAGTGAAGTGAAGCCC  
AGGGCTTAAACCGTGGGACTGCTTTTGAAGTGTGTTGCTGGATTGCCGGAGAGGTAAGTGGAAATCCAGTGTAGCGGTG  
AAATGCGTAGATATTAGGAGGAACACCAGTGGCGAAGGCGGCTTACTGGACGTTAACTGACGCTGAGGCTCGAAAGCGTG  
GGGAG  
>ASV:2680:Genus:Ruminiclostridium\_5  
TACGTAGGGAGCGAGCGTTGTCCGGATTTACTGGGTGTAAAGGGTGCAGGCGGCGAGGCAAGTCAAGTCAAGTGTGAAATCTA  
TGGGCTTAAACCCATAAACTGCGCTTGAAGTGTCTTGTAGTGAAGTAGAGGTAGGCGGAATTCAGGCTGTAGCGGTG  
AAATGCGTAGAGATCGGAGGAACACCAGTGGCGAAGGCGGCTTACTGGGCTTAACTGACGCTGAAGCACGAAAGCATG  
GGTAG  
>ASV:2681:Genus:Lachnospiraceae\_UCG-001  
TACGTAGGGGGCAAGCGTTATCCGGATTTACTGGGTGTAAAGGGAGCGAGGCGGCGTGGCAAGTCAAGTGTGAAATCCC  
GGGGCTTAAACCCCGGAGTGCATTTGAAACTGCCATGCTGGAGTGCAGGAGAGGTAAGCGGAATTCAGTGTAGCGGTG  
AAATGCGTAGATATTAGGAGGAACACCAGTGGCGGAGGCGGCTTACTGGACGTTAACTGACGCTGAGGCTCGAAAGCGTG  
GGGAG  
>ASV:2682:Genus:Sutterella  
TACGTAGGGTGCAGCGTTAATCGGAATTTACTGGGCGTAAAGCGTGCAGGCGGTTGGGTAAGACAGATGTGAAATCCC  
CGGGCTTAAACCTGGGAACTGCATTTGTGACTGCTCGACTGGAGTATGTAGAGGGGGGTGGAATTCAGTGTAGCAGTGT  
AAATGCGTAGATATTGGAAGAACACCAGTGGCGAAGGCGAGCCCTGGGGCAAACGACGCTCATGCACGAAAGCGTG  
GGGAG  
>ASV:2683:Order:Izimaplasmatales  
TACATAGGGGGCGAGCGTTATCCGGAATTTATTGGGCGTAAAGCGTGCAGGCGGCTTTTAAAGTCTGTGCTGAAAGCCC  
ACAGCTTAACTGTGGAGGGTGCATGGAAGTGGTGGCTTGAATCTAGAAGAGGTAAGTGGAAATCCATGTGTAGCGGTG  
AAATGCTTAGATATATTAGGAGGAACACCAGTGGCGAAGGCGGCTTACTGGTCTAGCATTGACGCTGAGGCGCGAAAGCGTA

GGTAG

>ASV:2684:Family:Ruminococcaceae

TACGTAGGTGGCAAGCGTTGTCCGGATTTACTGGGTGTAAGGGCGGTAGGCGGAGCTGCAAGTCAGATGTGAAATCTG  
GGGGCTCAACCCTCAAACTGCAATTTGAAACTGCAGCCCTTGAGTATCGGAGAGGCAAGCGGAATTCCTAGTGTAGCGGTG  
AAATGCGTAGATATTAGGAAGAACCACAGTGGCGAAGGCGGCTGCTGGACGACAACGACGCTGAGGCGCAAAGCGTG  
GGGAG

>ASV:2685:Genus:Ruminococcaceae\_UCG-005

TACGTAGGTGGCAAGCGTTGTCCGGATTTACTGGGTGTAAGGGCGGTGACGCCGGTCTGCAAGTCAGATGTGAAATCCA  
TGGGCTCAACCCTCAAACTGCTCTCAAACTGTATCCCTTGAGTATCGGAGAGGCAAGCGGAATTCCTAGTGTAGCGGTG  
AAATGCGTAGATATTAGGAGGAACACCAGTGGCGAAGGCGGCTTCTGGACGACAACGACGCTGAGGCGCAAAGCGTG  
GGGAG

>ASV:2686:Kingdom:Bacteria

TACGTAGGGGGCAAGCGTTATCCGGATTTACTGGGTGTAAGGGCGGTAGGCGGGACC GCAAGTCAGATGTGAAAACCTG  
GAGGCTCAACCTCCAGCCTGCAATTTGAAACTGTGTTCTTGAGTACTGGAGAGGCAAGCGGAATTCGTGGTGTAGCGGTG  
AAATGCTTAGATATCACGAAGAACCAGTGGCGAAGGCGGCTACTAGACTGCAACTGACACTGATGCTCGAAAAGTGTG  
GGTAT

>ASV:2687:Genus:Bacteroides

TACGGAGGATCCGAGCGTTATCCGGATTTATTGGGTTAAAGGGAGCGTAGATGGATGTTTAAAGTCAGTTGTGAAAGTCT  
GCGGCTCAACCGTAAAATTGCAAGTTGATACTGGGTACCTTGAGTGCAGCATAGGTAGGCGGAATTCGTGGTGTAGCGGTG  
GAATGCGTAGATATCGGGAGGAACACCAGTGGCGAAGGCGGCTACTGGGCACCAACTGACGCTGAGGCTCGAAAAGTGTG  
GGTAG

>ASV:2688:Genus:Phascolarctobacterium

TACGTAGGTGGCGAGCGTTGTCCGGATTTACTGGGCGTAAAGAGCATGTAGGCGGTTTAAATAAGTCAGCGGTGAAAATCG  
GGGGCTCAACCCGATGGCGTGGAAACTGTTAGGCTTGAGTGCAGGAGAGGAAAGGGGAATTCAGTGTAGCGGTG  
AATGCGTAGATATTAGGAGGAACACCAGTGGCGAAGGCGGCTTCTGGACGATGACTGACGTTGAGGCTCGAAAAGCGTG  
GGAGC

>ASV:2689:Genus:Faecalibacterium

AACGTAGGTCAACAGCGTTGTCCGGATTTACTGGGTGTAAGGGAGCGCAGGCGGGAAGACAAGTTGGAAGTAAAATCCA  
TGGGCTCAACCCTCAAACTGCTTTCAAACTGTTTTCTTGAGTGTGAGAGGTAGGCGGAACTCCCGGTGTAGCGGTG  
AAATGCTTAGATATCACGAAGAACCAGTGGCGAAGGCGGCTTCTGGACTGTAACGACGCTGATGCTCGAAAAGTGTG  
GGTAT

>ASV:2690:Family:Ruminococcaceae

TACGTAGGTGGCAAGCGTTGTCCGGATTTACTGGGTGTAAGGGTGCAGTGGCGGGGATGCAAGTCAGATGTGAAATCTA  
TCGGCTTAACTGTAAGTGCATTTGAACTGCATTTCTTGAGTGGTGGAGAGGTAAGCGGAATTCCTAGTGTAGCGGTG  
AAATGCGTAGATATTAGGAGGAACACCAGTGGCGAAGGCGGCTTACTGGACACTAAGTACGCTGAGGACGAAAGCATG  
GGGAG

>ASV:2691:Genus:Holdemania

TACGTAGGTGGCGAGCGTTATCCGGATTTATTGGGCTAAATGGTGCAGGCGGTTTGTAAAGTTTAAAGTAAAAGCGT  
GGGGCTTAAACCCATATAGCCTTAGAACTGACAGACTAGAGTACAGGAGAGGGCAATGGAATTCATGTGTAGCGGTAA  
AATGCGTAGATATATGGAGGAACACCAGTGGCGAAGGCGGTTGCCTGCCTGTAACGACGCTCATGACGAAAGCGTG  
GGAGC

>ASV:2692:Genus:Methanobrevibacter

CACCGCAGCTCTAGTGGTAGCAGTTTTATTGGGCTAAAGCGTCCGTAGCAGGTTTAAATAAGTCTCTGGTAAAATCT  
GCAGCTTAACTGTGGGAATTGCTGGAGATACTATTAGACTTGAGATCGGAGAGGTTAGAGGTAATCCAGGGTAGAGGT  
GAAATTCGTAACTCTGGGAGGACCGCTGTTGCGAAGGCGTCTGACTGGAACGATTCTGACGCTGAGGACGAAAGCTA  
GGGC

>ASV:2693:Order:Bacteroidales

TACGGAGGATCCGAGCGTTATCCGGATTTATTGGGTTAAAGGGAGCGTAGGCGGGTTGTTAAGTCAGTTGTGAAAGTTT  
GCGGCTCAACCGTAAAATTGCAAGTTGATACTGGATATCTTGAGTGCAGTTGAGGCGAGCGGAATTCCTCGTGTAGCGGTG  
AAATGCGTAGATATGGGAGGAACACCAGTGGCGAAGGCGGCTGCTGGGCTTAACTGACGCTGAGGACGAAAGCGTG  
GGTAG

>ASV:2694:Genus:UBA1819

AACGTAGGGTGAAGCGTTGTCCGGATTTACTGGGTGTAAGGGAGCGCAGGCGGATTGGCAAGTTGGGAGTAAAATCTA  
TGGGCTCAACCATAAATTGCTTTCAAACTGTCACTTGAGTGGTGTAGAGGTAGGCGGAATTCCTCGTGTAGCGGTG  
GAATGCGTAGATATCGGGAGGAACACCAGTGGCGAAGGCTGCCTACTGGGCACTAAGTACGCTGAGGCTCGAAAAGCATG  
GGTAG

>ASV:2695:Family:Lachnospiraceae

TACGTAGGGGGCAAGCGTTATCCGGATTTACTGGGTGTAAGGGAGCGTAGGCGGCCCGCAAGTCAGAAGTAAAACCC  
AGGGCTTAACTCTGGGATTGCTTTTGAACCTGTCAGGCTCGATTGCCGGAGAGGTAAGTGAATTCCTAGTGTAGCGGTG  
AAATGCGTAGATATTAGGAGGAACACCAGTGGCGAAGGCGGCTTACTGGACGTAAGTACGCTGAGGCTCGAAAAGCGTG  
GGGAG

>ASV:2696:Genus:Dorea

TACGTAGGGGGCAAGCGTTATCCGGATTTACTGGGTGTAAGGGAGCGTAGACGGCTGTGCAAGTCTGAAGTAAAAGGCA  
TGGGCTCAACCTGTGGACTGCTTTGAAACTGTGACGCTAGAGTGTGCGGAGAGGTAAGTGAATTCCTAGTGTAGCGGTG  
AAATGCGTAGATATTAGGAGGAACACCAGTGGCGAAGGCGGCTTACTGGACGATGACTGACGTTGAGGCTCGAAAAGCGTG  
GAGAG

>ASV:2697:Genus:Parabacteroides

TACGGAGGATCCGAGCGTTATCCGGATTTATTGGGTTAAAGGGTGCAGTGGTGGTAAAGTCAGCGGTGAAAAGTTT

GTGGCTCAACCATAAAATTGCCGTTGAAACTGGGTTACTTGAGTGTGTTTGGAGTAGGCGGAATGCGTGGTGTAGCGGTG  
GAATGCGTAGATATTGGGAGGAACACCAGTGGCGAAGGCGGCTACTGGGCACCAACTGACGCTGAGGCTCGAAAGTGTG  
GGTAG  
>ASV:2698:Genus:Ruminococcaceae\_UCG-010  
TACGTAGGTGGCGAGCGTTATCCGGAATTACTGGGTGTAAGGGTGTGTAGGCGGGAAGGCAAGTCAGATGTGAAAAC  
TACGTAGGTGGCGAGCGTTATCCGGAATTACTGGGTGTAAGGGTGTGTAGGCGGGAAGGCAAGTCAGATGTGAAAAC  
TGGGCTCAACCATAGCCTGCATTTGAGACTGTTTTCTTGAGGATGGGAGAGGTAATGGAATCCCGGTGTAGCGGTG  
AAATGCGTAGATATCGGAGGAACACCAGTGGCGAAGGCGGTTACTGGACCATTACTGACGCTGAGACACGAAAGCGTG  
GGGAG  
>ASV:2699:Genus:Flavonifractor  
TACGTAGGGAGCAAGCGTTATCCGATTACTGGGTGTAAGGGCGGTGTAGGCGGGTGGCAAGTCAGATGTGAAAAC  
TGGGCTCAACCATGGCCTGCATTTGAAACTGTTGGTCTTGAGTGTGGAGAGGCAATCGGAATCCCGTGTGTAGCGGTG  
AAATGCGTAGATATACGGAGGAACACCAGTGGCGAAGGCGGATTGCTGGACAGTAACGACGCTGAGGCGGAAAGCGTG  
GGGAG  
>ASV:2700:Genus:Family\_XIII\_AD3011\_group  
TACGTAGGGGGCGAGCGTTATCCGGAATTATTGGGCGTAAAGAGTGCCTAGGCGGTTTTTAAAGCGGGGTGAAAGGCA  
ATGGCTTAACCATTGTTAGCCCTGCGAACTGGGAGACTTGAGTGCAGGAGAGGAAAGCGGAATTCCTAGTGTAGCGGTG  
AATGCGTAGATATTAGGAGGAACACCAGTGGCGAAGGCGGCTTCTGGACTGTAACGACGCTGAGGCGGAAAGTGTG  
GGAG  
>ASV:2701:Genus:Ruminococcaceae\_UCG-013  
TACGTAGGTGGCAAGCGTTGTCCGGATTACTGGGTGTAAGGGCGGTGTAGGCGGGATTACAAGTCAGATGTGAAATAC  
GGGGCTTAACCTCCGGGCTGCATTTGAAACTGTAGTTCTTGAGTGCAGGAGAGGAAAGCGGAATTCCTAGTGTAGCGGTG  
AAATGCGTAGATATTAGGAGGAACACCAGTGGCGAAGGCGGCTTCTGGACGTAACGACGCTGAGGCGGAAAGCGTG  
GGGAG  
>ASV:2702:Family:Ruminococcaceae  
TACGTAGGTGGCAAGCGTTGTCCGGATTACTGGGTGTAAGGGAGCGCAGGCGGGATCGCAAGTCAGATGTGAAAAC  
TGGGCTTAACCATAAACTGCATTTGAAACTGTGTTCTTGAGTGAAGTAGAGGTAAGCGGAATTCCTAGTGTAGCGGTG  
AAATGCTTAGATATCACGAAGAACTCCGATTGCGAAGGCAGCTGCTGGACTGTAACGACGCTGATGCTCGAAAGTGTG  
GGTAT  
>ASV:2703:Genus:Faecalibacterium  
AACGTAGGTCAACAGCGTTGTCCGGAATTACTGGGTGTAAGGGAGCGCAGGCGGGAAGACAAGTTGGAAGTGAATCTA  
TGGGCTCAACCATAAACTGCTTTCAAACCTGTTTTCTTGAGTAGTGCAGAGGTAGGCGGAATTCCTAGTGTAGCGGTG  
GAATGCGTAGATATCACGCAGAACCCGATTGCGAAGGCAGCTGCTGGACTGTAACGACGCTGATGCTCGAAAGTGTG  
GGTAT  
>ASV:2704:Genus:Phocea  
TACGTAGGGAGCGAGCGTTGTCCGGAATTACTGGGTGTAAGGGAGCGTAGGCGGGCTCAAGTCGAATGTTAAATCTA  
CCGGCTCAACTGGTAGCTGCGTTGAAACTGGGGCTCTTGAGTGAAGTAGAGGCAGGCGGAATTCCTAGTGTAGCGGTG  
AATGCGTAGATATTAGGAGGAACACCAGTGGCGAAGGCGGCTGCTGGGCTTTACTGACGCTGAGGCTCGAAAGCGTG  
GGAG  
>ASV:2705:Species:wenyonii  
AACATAGGTACGAGCATTATCCGGATTTATTGGGCGTAAAGGAAGCGTAGGCGGGGAGGTTGATCCATTGTTAAAAGCA  
TTTGCTTAACAAATGTGTGCATTGGAGATCGCTCCCTAGAGTAAATCAGGGGACTGGAATTCATGTGTAGCGGTGG  
AATGCGTAGATATTAGGAGGAACACCAGAGGCTAAGGCGAGTGCCTAGGATATAACTGACGCTGAGGCTTAAAGCGTG  
GGAG  
>ASV:2706:Species:somerae  
TACGGAGGATACGAGCGTTATCCGGATTTATTGGGTTAAAGGGTGCCTAGGTGGCTGATTAAGTCAGTGGTAAAAGCT  
ATGGCTCAACCATAGTCTTGCCGTTGATACTGGTTAGCTTGAGTGTAGATGATGTAGGCGGAATGCGTAGTGTAGCGGTG  
AAATGCATAGATATTACGCAGAACCTCCGATTGCGAAGGCAGCTTACAAAACCTACTACTGACACTGAGGCACGAAAGCGTG  
GGTAT  
>ASV:2707:Order:Bacteroidales  
TACGGAGGATCCGAGCGTTATCCGGATTTATTGGGTTAAAGGGAGCGTAGGCGGACGCTTAAGTCAGTGTGAAAAGTT  
GCGGCTCAACCGTAAAATTGCAGTTGATACTGGGTGTCTTGAGTGCAGTTGAGGCAGGCGGAATTCGTGGTGTAGCGGTG  
AAATGCGTAGAGATCTGGAGGAATACCGGTGGCGAAGGCGGCCCCCTGGACGAAGACTGACGCTCAGGTGCGAAAGCGTG  
GGGAG  
>ASV:2708:Genus:Bacteroides  
TACGGAGGATCCGAGCGTTATCCGGATTTATTGGGTTAAAGGGAGCGTAGGTGGATTGTTAAGTCAGTGTGAAAAGTT  
GCGGCTCAACCGTAAAATTGCAGTTGAAACTGGCAGTCTTGAGTACAGTAGAGGTGGGCGGAATTCGTGGTGTAGCGGTG  
AAATGCTTAGATATCACGAAGAACCTCCGATTGCGAAGGCAGCTCACTAGACTGTTACTGACACTGATGCTCGAAAGTGTG  
TGTAT  
>ASV:2709:Genus:Veillonella  
TACGTAGGTGGCAAGCGTTGTCCGGAATTATTGGGCGTAAAGCGCGCAGGCGGATCAGTCAGTCTGTCTTAAAAGTT  
GGGGCTTAACCCGTTAGTGGATGGAACCTGCTGATCTAGAGTATCGGAGAGGAAAGTGAATTCCTAGTGTAGCGGTG  
AATGCGTAGAGATTAGGAAGAACCCGTTGGCGAAGGCGACTTTCTGGACGAAAACGACGCTGAGGCGGAAAGCGTG  
GGAG  
>ASV:2710:Genus:Parabacteroides  
TACGGAGGATGCGAGCGTTATCCGGATTTATTGGGTTAAAGGGTGCCTAGGTGGTGTGTTAAGTCAGCGGTGAAAAGTT  
GTGGCTCAACCATAAAATTGCCGTTGAAACTGGGTTACTTGAGTGTGTTTGGAGTAGGCGGAATGCGTGGTGTAGCGGTG  
AAATGCATAGATATCGGAGGAACACCAGTGGCGAAGGCGACTACTGGGCACCAACTGACGCTGAGGCGGAAAGCGTG  
GGGAG



>ASV:2711:Genus:Methylobacterium  
TACGAAGGGGGCTAGCGTTGCTCGGAATCACTGGGCGTAAAGGGCGCGTAGGCGGCCATTCAAGTCGGGGGTGAAAGCCT  
GTGGCTCAACCACAGAATTGCCTTCGATACTGTTGGCTTGAGTATGGTAGAGGTGGTGGAACTGCGAGTGTAGAGGTG  
AAATTCGTAGATATTCGCGAGAACCACAGTGGCGAAGGCGCCGACTGGACCATTACTGACGCTGAGGCGCAAAGCGTG  
GGGAG

>ASV:2712:Genus:Ruminococcaceae\_UCG-014  
TACGTAGGGAGCGAGCGTTATCCGGAATTTGGGTGTAAGGGTGCCTAGACGGGATAACAAGTTAGTTGTGAAATCCC  
TCGGCTTAACCTGAGGAATGCAACTAAACTATTATCTTGAGTGCAGGAGAGGTAAGTGGAAATTCCTAGTGTAGCGGTG  
AAATGCGTAGATATTAGGAGGAACACCAGTGGCGAAGGCGACTTACTGGACTGTAACCTGACGTTGAGGCACGAAAGTGTG  
GGGAG

>ASV:2713:Order:Bacteroidales  
TACGGAGGATCCGAGCGTTATCCGGATTTATTGGGTTTAAAGGGAGCGTAGATGGATGTTTAAAGTCAGTTGTGAAAGTTT  
GCGGCTCAACCTGAAAATTGCAAGTTGATACTGGATATCTTGAGTGCAGTTGAGGCGAGACGGAATTCCTAGTGTAGCGGTG  
AAATGCGTAGATATTAGGAGGAACACCAGTGGCGAAGGCGGCTTACTGGACGATAACTGACGCTGAGGCGCAAAGCGTG  
GGGAG

>ASV:2714:Family:Lachnospiraceae  
TACGTATGGAGCAAGCGTTATCCGGAATTTACTGGGTGTAAGGGTGCCTAGGTGGTATGGCAAGTCAGAAGTGAAACCC  
AGGGCTTAACCTGGAACTGCCTTTGAAACTGTCAGACTGGAGTGCAGGAGAGGTAAGCGGAATTCCTAGTGTAGCGGTG  
AAATGCTTAGATATCACGAAGAATCCGATTGCGAAGGCAGCTGCTAAGCTGCAACTGACATTGAGGCTCGAAAGTGTG  
GGTAT

>ASV:2715:Genus:Caulobacter  
TACGAAGGGGGCTAGCGTTGCTCGGAATTTACTGGGCGTAAAGGGAGCGTAGGCGGACTGTTTAGTCAGAGGTGAAAGCCC  
AGGGCTCAACCTGGAACTGCCTTTGTTACTGGCAGCTTGGAGTACGGAAGAGGTATGTGGAATCCGAGTGTAGAGGTG  
AAATTCGTAGATATTCGGAAGAACCAGTGGCGAAGGCGACATACTGGTCCGTTACTGACGCTGAGGCTCGAAAGCGTG  
GGGAG

>ASV:2716:Species:hispanicum  
TACGAAGGGGGCTAGCGTTGCTCGGAATCACTGGGCGTAAAGGGCGCGTAGGCGGCGTTTTAAGTCGGGGGTGAAAGCCT  
GTGGCTCAACCACAGAATGCACTTCGATACTGGGACGCTTGGAGTCTGGTAGAGGTTGGTGGAACTGCGAGTGTAGAGGTG  
AAATTCGTAGATATTCGGAAGAACCAGTGGCGAAGGCGGCAACTGGACCAGTACTGACGCTGAGGCGCAAAGCGTG  
GGGAG

>ASV:2717:Genus:Lachnospiraceae\_UCG-004  
TACGTAGGGGGCAAGCGTTATCCGGATTTACTGGGTGTAAGGGAGCGTAGACGGCGACGCAAGTCTGAAGTGAATACC  
CGGGCTCAACCTGGGAATGCTTTGAAACTGTGTTGCTAGAGTCTGGAGAGGCAAGCGGAATTCCTAGTGTAGCGGTG  
AAATGCGTAGATATTAGGAAGAACCAGTGGCGAAGGCGGCTTACTGGACAGTAACTGACGTTGAGGCTCGAAAGCGTG  
GGGAG

>ASV:2718:Species:bergensis  
TACGGAAGGTCGCGGCTTATCCGGATTTATTGGGTTTAAAGGGAGCGTAGGCGGTTAAGTGTGTTGTGAAATCCG  
GTTGCTCAACATCCGGTTTGCAGCGCATACTGTCTCACTTGGAGTGCACACAACGAGGCGGAATTCGTCGTGTAGCGGTG  
AAATGCTTAGATATGACGAGGAACCCGATTGCGAAGGCAGCTTGGGGAGCGCAACTGACGCTTAAAGTCTGAAAGTGGC  
GGTAT

>ASV:2719:Genus:Harryflintia  
TACGTAGGTGGCAAGCGTTGTCGGAAATTTACTGGGTGTAAGGGAGCGTAGGCGGGATGCAAGTTGAATGTTTAAACTA  
TGGGCTCAACCGATAGTCGCTTCAAACCTGCATTTCTTGAGTGGAGTAGAGGCAGGCGGAATTCCTAGTGTAGCGGTGA  
AATGCGTAGATATTAGGAGGAACACCAGTGGCGAAGGCGGCTGCTGGGCTCTAACTGACGCTGAGGCTCGAAAGCGTG  
GTAGC

>ASV:2720:Genus:Lachnospiraceae\_UCG-004  
TACGTAGGGGGCAAGCGTTATCCGGATTTACTGGGTGTAAGGGAGCGTAGACGGCGATGCAAGTCTGAAGTGAATACC  
CGGGCTCAACCTGGGAATGCTTTGAAACTGTGTTGCTAGAGTCTGGAGAGGTAAGCGGAATTCCTAGTGTAGCGGTG  
AAATGCGTAGATATTAGGAAGAACCAGTGGCGAAGGCGGCTTACTGGACAGTAACTGACGTTGAGGCTCGAAAGCGTG  
GGGAG

>ASV:2721:Family:Lachnospiraceae  
TACGTAGGGGGCAAGCGTTATCCGGATTTACTGGGTGTAAGGGAGCGTAGACGGCATGGCAAGTCTGATGTGAAAGCCC  
GGGGCTCAACCCGGGACTGCATTGGAACCTGTTAAGCTGGAGTGCAGGAGAGGTAAGCGGAATTCCTAGTGTAGCGGTG  
AAATGCGTAGATATTAGGAGGAACACCAGTGGCGAAGGCGGCTTACTGGACTGTAACCTGACGTTGAGGCTCGAAAGCGTG  
GGGAG

>ASV:2722:Genus:DNF00809  
TACGTAGGGGGCGAGCGTTATCCGGATTTACTGGGCGTAAAGCGCGCGCAGGCGGCCGTCGAAGCGGGACCTTAATCCC  
GGGGCTCAACCCCGGCGCGGCTCCCGACTGGGCGGCTCGAGTTCGGTAGAGGAGGTTGGAATTCGCGGTGTAGCGGTG  
GAATGCGCAGATATCGGGAGGAACACCAGTGGCGAAGGCGGCTTCTGGGCCACACTGACGCTGAGGCGCAAAGCCGG  
GGGAG

>ASV:2723:Family:Lachnospiraceae  
TACGTAGGGGGCAAGCGTTATCCGGATTTACTGGGTGTAAGGGAGCGTAGACGGCAGTGAAGTCTGATGTGAAAGCCC  
GGGGCTCAACCCGGGACTGCATTGGAACCTGTGCAGCTGGAGTGTGCGAGAGGTAAGTGGAAATTCCTAGTGTAGCGGTG  
AAATGCGTAGATATTAGGAGGAACACCAGTGGCGAAGGCGGCTTACTGGACGATAACTGACGTTGAGGCTCGAAAGCGTG  
GGGAG

>ASV:2724:Genus:Odoribacter  
TACGGAGGATGCGAGCGTTATCCGGATTTATTGGGTTTAAAGGGTGCCTAGGCGGTTTATTAAGTTAGTGGTTAAACGTC  
AGAGCTAAACTTTGATTTGCCATTAATACTGGTAAACTGGAGTACAGACGAGGTAGGCGGAATAAGTTAAGTAGCGGTGA

AATGCATAGATATACTTAGAACTCCGATAGCGAAGGCAGCTTACCAGGCTGTAAGTACGCTGAAGCACGAGAGCGTGG  
GTAGC  
>ASV:2725:Species:nucleatum  
TACGTATGTCACGAGCGTTATCCGGATTTATTGGGCGTAAAGCGCTAGGTGGTTATATAAGTCTGATGTGAAAATGC  
AGGGCTCAACTCTGTATTGCGTTGGAACTGTATAACTAGAGTACTGGAGAGGTAAGCGGAACACAAGTGTAGAGGTGA  
AATTCGTAGATATTTGTAGGAATGCCGATGGGGAAGCCAGCTTACTGGACAGATACTGACGCTGAAGCGCGAAAGCGTG  
GTAGC  
>ASV:2726:Species:arboricola/axonopodis/bromi/campestris/cannabis/cassavae/citri/cucurbitae/  
cynarae/dyei/fragariae/gardneri/hortorum/maliensis/oryzae/phaseoli/pisi/theicola/vasicola/  
vesicatoria  
TACGAAGGGTGCAAGCGTTACTCGGAATTACTGGGCGTAAAGCGTGCCTAGGTGGTGGTTTAAAGTCTGTTGTGAAAGCCC  
TGGGCTCAACTGGGAATTGCAGTGGATACTGGGCTACTAGAGTGTGGTAGAGGGTAGCGGAATCCCGGTGTAGCAGTG  
AAATGCGTAGAGATCGGGAGGAACATCCGTGGCGAAGGCGGTACTTGGACCAACACTGACACTGAGGCACGAAAGCGTG  
GGGAG  
>ASV:2727:Species:lacusekhoensis  
TACGTAGGGCGCAGCGTTATCCGGATTTATTGGGCGTAAAGAGCTCGTAGGCGGTTTGTACAGTCTGCTGTGAAAGCCC  
GGGGCTTAACCCGGGTGTGCAGTGGTACGGGCAGACTGGAGTGCAGTAGGGGAGACTGGAATTCCTGGTGTAGCGGTG  
AAATGCGCAGATATCAGGAGGAACACCGATGGCGAAGGCGGTCTCTGGGCTTTACTGACGCTGAGGAGCGAAAGCATG  
GGGAG  
>ASV:2728:Genus:Ruminococcaceae\_UCG-013  
TACGTAGGTGGCAAGCGTTGTCCGGATTTACTGGGTGTAAGGGCGTGTAGGCGGATTTGAAAGTCAGGCGTGAAATGCC  
GCAGCTTAACCTGCGGAGCTGCGCTTGAACCTCAGACCTTGTAGTACCGGAGAGGAAAGCGGAATTCCTAGTGTAGCGGTG  
AAATGCGTAGATATTAGGAGGAACACCACTGGCGAAGGCGGCTTTCTGGACGCAACTGACGCTGAGGCGCGAAAGTGTG  
GGGAG  
>ASV:2729:Family:Bifidobacteriaceae  
TACGTAGGGTGCAAGCGTTATCCGGATTTATTGGGCGTAAAGGGCTCGTAGGCGGTTCTGCGCTCCGGTGTGAAAGTCC  
ATCGCTTAACGGTGGATCCGCGCCGGTACGGGCGGGCTTGTAGTGCAGTAGGGGAGACTGGAATTCCTGGTGTAGCGGTG  
AAATGCGTAGAGATTGGGAGGAACACCACTGGCGAAGGCGACTAACTGGACTGTAAGTACGCTGATGCTCGAAAGTGTG  
GGTAT  
>ASV:2730:Family:Ruminococcaceae  
TACGTAGGGAGCGAGCGTTGTCCGGATTTACTGGGTGTAAGGGCGTGTAGGCGGTTCTGCAAGTCAGATGTGAAATCC  
CGGGCTTAACCTGCGGCGCTGCATTTGAAACTGTAGATCTTGTAGTGGAGAGGAAAGCGGAATTCCTAGTGTAGCGGTG  
AAATGCGTAGATATTAGGAGGAACACCACTGGCGAAGGCGGCTTTCTGGACACTAACTGACGCTGAGGCGCGAAAGCGTG  
GGGAG  
>ASV:2731:Species:tangshanensis  
TACAGAGGGTGCAAGCGTTAATCGGAATTACTGGGCGTAAAGCGCACGCTAGGCGGTTTTTTAAGTCAGATGTGAAAGCCC  
CGGGCTCAACTCGGGGACTGCTTTTGAACCTGGGAACTAGAGTGTGTGAGAGGGGGTAGAATTCCTAGTGTAGCGGTG  
AAATGCGTAGAGATTGGAGGAATACCACTGGCGAAGGCGGCCCCCTGGCACAACTGACGCTCAGGTGCGAAAGCGTG  
GGGAG  
>ASV:2732:Species:vacciae  
TACGTAGGGTCCGAGCGTTGTCCGGATTTACTGGGCGTAAAGAGCTCGTAGGTGGTTTGTGCGGTTGTCCGTGAAACTC  
ACAGCTCAACTGTGGGCGTGGGCGATACGGGCAGACTAGAGTACTGCAGGGGAGACTGGAATTCCTGGTGTAGCGGTG  
GAATGCGCAGATATCAGGAGGAACACCGGTGGCGAAGGCGGTTCTCTGGCAGTAAGTACGCTGAGGAGCGAAAGCGTG  
GGGAG  
>ASV:2733:Family:Lachnospiraceae  
TACGTAGGGGGCAAGCGTTATCCGGATTTACTGGGTGTAAGGGAGCGTAGACGGTCAAGCAAGTCAGAAGTGAAGGGCT  
GGGGCTCAACCCGGGACTGCTTTTGAACCTGTTGAACTGTAGAGTGTGGAGAGGTAAGCGGAATTCCTAGTGTAGCGGTG  
AAATGCGTAGATATTAGGAGGAACACCACTGGCGAAGGCGGTCAACTGGACGATAACTGACGCTGAGGCGCGAAAGCGTG  
GGGAG  
>ASV:2734:Genus:Lachnoclostridium  
TACGTAGGGGGCAAGCGTTATCCGGATTTACTGGGTGTAAGGGAGCGCAGACGGCGATGCAAGTCTGGAGTGAACCC  
GGGGCTCAACCCGGGACTGCTTTTGAACCTGTATGGCTAGAGTGTGGAGAGGCAAGCGGAATTCCTAGTGTAGCGGTG  
AAATGCGTAGATATTAGGAGGAACACCACTGGCGAAGGCGGTTGCTGGACAGTAAGTACGCTTACGCTCGAAAGCGTG  
GGGAG  
>ASV:2735:Species:aichiense/anyangense/bacteremicum/canariasense/chubuense/cosmeticum/duvalii/  
gilvum/hippocampi/iranicum/jacuzzii/lacticola/litorale/mageritense/moriokaense/murale/neoaurum/  
peregrinum/tokaiense/wolinskyi  
TACGTAGGGTCCGAGCGTTGTCCGGATTTACTGGGCGTAAAGAGCTCGTAGGTGGTTTGTGCGGTTGTTCTGTGAAAACCTC  
ACAGCTTAACCTGTGGGCGTGGGCGATACGGGCAGACTGGAGTACTGCAGGGGAGACTGGAATTCCTGGTGTAGCGGTG  
GAATGCGCAGATATCAGGAGGAACACCGGTGGCGAAGGCGGTTCTCTGGCAGTAAGTACGCTGAGGAGCGAAAGCGTG  
GGGAG  
>ASV:2736:Genus:Lachnospiraceae\_UCG-004  
TACGTAGGGGGCAAGCGTTATCCGGATTTACTGGGTGTAAGGGAGCGTAGACGGCGACGCAAGTCTGAAGTGAATACC  
CGGGCTCAACCTGGGAACTGCTTTGAAACTGTGTTGCTAGAGTGTGGAGAGGTAAGCGGAATTCCTAGTGTAGCGGTG  
AAATGCGTAGATATTAGGAGGAACACCACTGGCGAAGGCGGTTGCTGGACGACAAGTACGCTGAGGCGCGAAAGCGTG  
GGGAG  
>ASV:2737:Family:Peptostreptococcaceae  
TACGTAGGGGCTAGCGTTATCCGGATTTACTGGGCGTAAAGGGTGCCTAGGTGGTTTCTTAAGTACAGAGGTGAAGGGCT

ACGGCTCAACCGTAGTAAGCCTTTGAAACTGGGAACTTGAGTGCAGGAGAGGAGAGTGAATTCTAGTGTAGCGGTGA  
AATGCGTAGATATTAGGAGGAACACCAAGTGGCGAAGGTGGCTTACTGGACGATGACTGACGCTGAGGCTCGAAAGCGTG  
GGAG

>ASV:2738:Family:Lachnospiraceae

TACGTAGGGGGCAAGCGTTATCCGGATTTACTGGGTGTAAGGGGAGCGTAGACGGCGCAGCAAGTCTGATGTGAAAGGCA  
GGGGCTTAACCTCGACTGCATTGAAACTGCTGTGCTTGTAGTGCCGGAGGGTAAGCGGAATTCCTAGTGTAGCGGTG  
AAATGCTTAGATATCACGAAGAATCCGATTGCGAAGGCAGCCTGCTGGACTGTAACGACGCTGATGCTCGAAAGGTG  
GGTAT

>ASV:2739:Family:Lachnospiraceae

TACGTAGGGGGCAAGCGTTATCCGGATTTACTGGGTGTAAGGGGGCGTAGGCGGCATGGCAAGTCAGAAGTAAAAGCCT  
GGGGCTCAACCCCGTACTGCATTGAAACTGCTGCTACTAGAGTGCCGGAGGGTAAGCGGAATTCCTAGTGTAGCGGTG  
AAATGCGTAGAGATCTGAGGAATACCGTGGCGAAGGCGCCCCCTGGACAAGACTGACGCTCAGGTGCGAAAGCGTG  
GGGAG

>ASV:2740:Kingdom:Bacteria

TACGGAGGATTCAAGCGTTATCCGGATTTATTGAGTTAAAGGGAGCGTAGGCGGACGCTTAAGTCAGTTGTGAAAGTTT  
GCGGCTCAACCGTAAAATTGCAGTTGATACTGGGTGCTTGTAGTACAGTAGAGGCAGGCGGAATTCCTAGTGTAGCGGTG  
GAATGCGTAGATATCGGGAGGAACACCAAGTGGCGAAGGCGCCTACTGGCACCAACTGACGCTGAGGCTCGAAAGGTG  
GGTAG

>ASV:2741:Genus:Victivallis

TACGTAGGTGGCGAGCGTTGTTCCGGATTTATTGGGCGTAAAGGGTCTGTAGGAGGTTTGTAAATACGAGGTGAAATCCG  
GGGGCTCAACCTCCGAATTGCCTTGTAGACTGATGAACTAGAGTACTGGAGAGGTAAGCGGAATACCAAGGTGTAGCGGTG  
GAATGCGTAGATATCTGGTAGAACCAATAGCGAAGGCAGCTTGTGGACAGAAACTGACTCTGAAAGACGAAAGCATG  
GGGAG

>ASV:2742:Family:Lachnospiraceae

TACGTAGGGGGCAAGCGTTATCCGGATTTACTGGGTGTAAGGGTGCCTAGGTGGCAAGGTAAGTCAGATGTGAAAGCCC  
GGGGCTCAACCCCGTATTGCATTTGAAACTGTTTAGCTAGAGTGACAGGAGGTAAGTGAATTCCTAGTGTAGCGGTG  
AAATGCGTAGATATTAGGAGGAACACCAAGTGGCGAAGGCGCCTACTGGACTGTAACGACACTGAGGCACGAAAGCGTG  
GGGAG

>ASV:2743:Species:antarctica/brenneri/chlororaphis/denitrificans/extremaustralis/fluorescens/  
gessardii/marginalis/meridiana/palleroniana/panacis/poae/proteolytica/putida/rhodesiae/veronii

TACAGAGGGTGAAGCGTTAATCGGAATTACTGGGCGTAAAGCGCGCTAGGTGGTTAGTTAAGTTGGATGTGAAATCCC  
CGGGCTCAACCTGGGAACTGCATTCAAACCTGACTGACTAGAGTATGGTAGAGGGTGGTGAATTCCTGTGTAGCGGTG  
AAATGCGTAGATATAGGAAGGAACACCAAGTGGCGAAGGCGCACCACTGGACTGATACTGACACTGAGGTGCGAAAGCGTG  
GGGAG

>ASV:2744:Genus:UC5-1-2E3

TACGTAGGTGGCAAGCGTTGTCCGGAATTATTGGGCGTAAAGCGCGCAGGCGGCTTCCCAAGTCCCTCTTAAAAGTGC  
GGGGCTCAACCCCGGACTGCTTTGGAACTGTAGAGCTGCTGGAGAGGTAAGCGGAATTCCTAGTGTAGCGGTG  
AAATGCGTAGATATTAGGAAGAACACCAAGTGGCGAAGGCGGCTTGTGGACAGTAACGACGCTGAGGCTCGAAAGCGTG  
GGGAG

>ASV:2745:Genus:Oscillibacter

TACGTAGGTGGCAAGCGTTGTCCGATTTACTGGGTGTAAGGGGCGTGCAGCCGGGCAGGCAAGTCAGATGTGAAATCTG  
GAGGCTTAACCTCAAACCTGCATTGAAACTGCTGTCTTGTAGTATCGGAGAGGTAAGCGGAATTCCTTGTGTAGCGGTG  
AAATGCGTAGATATAAGGAAGAACACCAAGTGGCGAAGGCGGTTACTGGACGACAACGACGCTGAGGCACGAAAGCGTG  
GGGAG

>ASV:2746:Genus:Blautia

TACGGAGGATCCGAGCGTTATCCGGATTTACTGGGTGTAAGGGGAGCGTAGACGGTGTGGCAAGTCTGATGTGAAAGGCA  
TGGGCTCAACCTGTGGACTGCATTTGAAACTGTCATACTTGTAGTGCCGGAGGGTAAGCGGAATTCCTAGTGTAGCGGTG  
AAATGCGTAGATATTAGGAGGAACACCAAGTGGCGAAGGCGCCTGCTGGCTTTAACTGACGCTGAGGCACGAAAGCGTG  
GGTAG

>ASV:2747:Class:Bacteroidia

TACGGAGGATCCGAGCGTTATCCGGATTTATTGGGTTAAAGGGTGCCTAGGCGGCTTTTAAAGTCAGCGGTGAAAGTCT  
GTGGCTCAACCATAGAATTGCCGTTGAAACTGGGGGCTTGTAGTATGTTTGTAGGCAGACGGAATTCCTAGTGTAGCGGTG  
AAATGCGTAGATATTAGGAGGAACACCAAGTGGCGAAGGCGGCTGCTGGACAGCAACTGACGCTGAGGCACGAAAGCGTG  
GGGAG

>ASV:2748:Genus:Lachnospira

TACGGAGGATCCGAGCGTTATCCGGATTTATTGGGTTAAAGGGAGTGTAGGTGGCCAGGCAAGTCAGAAGTAAAAGCCC  
GGGGCTCAACCCCGGACTGCTTTGAAACTGCAGGGCTAGAGTGCCGGAGGGTAAGCGGAATTCCTAGTGTAGCGGTG  
AAATGCGTAGATATTAGGAAGAACACCAAGTGGCGAAGGCGCCTACTGGACAGTAACGACGTTGAGGCTCGAAAGCGTG  
GGGAG

>ASV:2749:Genus:Ruminococcus\_1

TACGTAGGGAGCGAGCGTTGTCCGGAATTACTGGGTGTAAGGGGAGCGTAGGCGGGGCGGCAAGTCAGTGTGAAATTTA  
TGGGCTTAACCCATAACCTGCATTTGAAACTGTCGCTTGTAGTGAAGAAGAAGTTGGCGGAATTCCTAGTGTAGCGGTG  
AAATGCGTAGATATTAGGAGGAACACCAAGTGGCGAAGGCGCCTACTGGACAGTAACGACGTTGAGGCTCGAAAGCGTG  
GGGAG

>ASV:2750:Genus:Anaerostipes

TACGTAGGGGGCAAGCGTTATCCGGAATTACTGGGTGTAAGGGTGCCTAGGTGGTATGGCAAGTCAGAAGTAAAAGCCC  
AGGGCTTAACCTCGGACTGCTTTTGAACCTGCAGACTAGAGTGCCGGAGGGTAAGCGGAATTCCTAGTGTAGCGGTG  
AAATGCTTAGATATCACGAAGAATCCGATTGCGAAGGCAGCCTGCTGGACTGTAACGACGCTGATGCTCGAAAGGTG

GGTAT

>ASV:2751:Phylum:Firmicutes

TACGTGGGTCGCAAGCGTTATCCGGAATCATTGGGCGTAAAGAGTGAGCAGGCGGTCCGGGAAGTCCGCGGTGAAATGCG  
GGGGCTCAACCCCGCAGGCCGCGGATACTTCCGGTCTGGGGTGCAGGAGAGGCGGACGGAATCCCGGTGTAGCGGTGA  
AATGCACTGATACGCGGAAGAACACCGGTGGCGAAGGCGGTCCGCCAGACCGATAACCGACGCTCAGTACGAAAGCGTGG  
GGAGC

>ASV:2752:Species:caecimuris/mucosicola

TACGTAGGGGCGAGCGTTATCCGGATTCTGGGCGTAAAGCGCGGTAGGCGGCCCTAAGCGGAACCTCTAACCC  
GGGGCTCAACCTCGGGCCGGTTCGGACTGGGCGGCTCGAGTGCAGGTAGAGGAGAGCGGAATCCCGGTGTAGCGGTGG  
AATGCGCAGATATCGGGAAGAACACCGATGGCGAAGGCGACTCTCTGGGCCGCTACTGACGCTGAGGCGGAAAGCTGGG  
GGAGC

>ASV:2753:Species:baumannii/populi/radioresistens

TACAGAGGGTGCAGCGTTAATCGGATTTACTGGGCGTAAAGCGTGCAGGCGCCAATTAAGTCAATGTGAAATCCC  
CGAGCTTAACTTGGGAATTGCATTGATACTGGTGGCTAGAGTATGGGAGAGGATGGTAGAATCCAGGTGTAGCGGTG  
AAATGCGTAGAGATCTGGAGGAATACCGATGGCGAAGGCGACTCTGGCCTAATACTGACGCTGAGGTACGAAAGCATG  
GGGAG

>ASV:2754:Genus:Bacteroides

TACGGAGGATTCAAGCGTTATCCGGATTTATTGGGTTAAAGGGAGCGTAGGTGGATTGTTAAGTCAAGTGTGAAAGTTT  
GCGGCTCAACCGTAAAATTGCAGTTGAAACTGGCAGTCTTGGTACAGTAGAGGTGGGCGGAATTCGTGGTGTAGCGGTG  
AAATGCTTAGATATCACGAAGAATCCGATTGCGAAGGCGACTGCTAAGCTGCAACTGACATTGAGGCTCGAAAGTGTG  
GGTAT

>ASV:2755:Family:Lachnospiraceae

TACGTAGGGGGCAAGCGTTATCCGGATTTACTGGGTGTAAGGGAGCGTAGACGGTGTGGCAAGTCTGATGTGAAAGGCA  
TGGGCTCAACCTGTGGACTGCATTGAAACTGTCATACTTGGTGGCAGGAGGGTAAGCGGAATTCCTAGTGTAGCGGTG  
AAATGCATAGATATCACGCAGAATCCGATTGCGAAGGCGACTTACTAAACCATAACTGACACTGAAGCACGAAAGCGTG  
GGTAT

>ASV:2756:Family:Lachnospiraceae

TACGTATGGTCAAGCGTTATCCGGATTTACTGGGTGTAAGGGAGCGTAGACGGATGGCAAGTCTGATGTGAAAACCC  
GGGGCTCAACCCGGGACTGCATTGAAACTGTTTCTAGAGTGTGAAAGGTAAGTGGAAATTCCTAGTGTAGCGGTG  
AAATGCTTAGAGATCATAACGAACACCGATTGCGAAGGCGACTTACCAAATATATCTGACGTTGAGGCACGAAAGCGTG  
GGGAG

>ASV:2757:Genus:Faecalibacterium

AACGTAGGTCAAGCGTTGTCCGGAATTAAGGGTGTAAAGGGAGCGCAGGCGGGAAGACAAGTTGGAAGTGAATTTA  
TGGGCTCAACCATAAACTGCTTTCAAAGTCTTTCTTGGTGTGAAAGGTAAGTGGAAATTCCTAGTGTAGCGGTG  
GAATGCGTAGATATCGGGAGGAACACCGATTGCGAAGGCGGCTACTGGGCACCAACTGACGCTGAGGCTCGAAAGTGTG  
GGTAG

>ASV:2758:Family:Rhodobacteraceae

TACGGAGGGGCTAGCGTTATCCGGAATTAAGGGTGTAAAGGGAGCGTAGGCGGATCAGAAAGTCAAGGTGAAATCCC  
AGGGCTCAACCTGGAAGTGCCTTTGAAACTCCTGATCTTGGTTCGAGAGAGGTGAGTGGAAATCCGAGTGTAGAGGTG  
AAATTCGTAGATATCCGGAGGAACACCGATTGCGAAGGCGGCTACTGGCTCGATACTGACGCTGAGGTGCGAAAGCGTG  
GGGAG

>ASV:2759:Genus:Lysinibacillus

TACGTAGGTGGCAAGCGTTGTCCGGAATTAAGGGTGTAAAGGGAGCGCAGGCGGTTCTTAAGTCTGATGTGAAAGCCC  
ACGGCTCAACCGTGGAGGTCATTGAAACTGGGAACTTGGTGCAGAGAGGAAAGTGGAAATCCAAGTGTAGCGGTG  
AAATGCGTAGAGATTTGGAGGAACACCGATTGCGAAGGCGACTTTCTGGTCTGTAAGTCAACTGACACTGAGGCGCGAAAGCGTG  
GGGAG

>ASV:2760:Genus:Blautia

TACGGAGGATCCGAGCGTTATCCGATTTACTGGGTGTAAGGGAGCGTAGACGGTGTGGCAAGTCTGATGTGAAAGGCA  
TGGGCTCAACCTGTGGACTGCATTGAAACTGTCATACTTGGTGGCAGGAGGTAAGCGGAATTCCTAGTGTAGCGGTG  
AAATGCGTAGATATTAGGAGGAACACCGATTGCGAAGGCGGCTACTGGGCACCAACTGACGCTGAGGCTCGAAAGTGTG  
GGTAG

>ASV:2761:Genus:Lachnospiraceae\_UCG-001

TACGTAGGGGGCAAGCGTTATCCGATTTACTGGGTGTAAGGGAGCGCAGGCGGTCTGTCAAGTCTGATGTGAAATCCC  
GGGGCTCAACCTGGAAGTGCATTGAAACTGTCAGACTAGAGTGCAGGAGGTAAGTGGAAATTCCTAGTGTAGCGGTG  
AAATGCGTAGATATTAGGAGGAACACCGATTGCGAAGGCGGCTACTGGACGGTAAGTCAACTGACGCTGAGGCTCGAAAGCGTG  
GGGAG

>ASV:2762:Family:Lachnospiraceae

TACGTAGGTGGCAAGCGTTGTCCGGAATTAAGGGTGTAAAGGGAGCGCAGGCGGTGCGGCAAGTCTGATGTGAAAGCCC  
GGGGCTCAACCCGGTACTGCATTGAAACTGTCGTAAGTGTGCGGAGGGTAAGCGGAATTCCTAGTGTAGCGGTG  
AAATGCGTAGATATCACGAAGAATCCGATTGCGAAGGCGACTACTAGACTGCTACTGACACTGATGCTCGAAAGTGTG  
GGTAT

>ASV:2763:Family:Lachnospiraceae

TACGTAGGGGGCAAGCGTTATCCGATTTACTGGGTGTAAGGGAGCGTAGGTGGCAATGCAAGCCAGAAGTGAAGCCC  
GGGGTAAACCCCGGACTGCTTTTGAAGTGTATAGTGGAGTGTGAGAGGTAAGCGGAATTCCTGGTGTAGCGGTG  
GAAATGCGTAGATATCAGGAGGAACACCGGTGGCGAAGGCGGCTTACTGGACAGTAACTGACACTGAGGCTCGAAAGCGTG  
GGGGA

>ASV:2764:Family:Ruminococcaceae

TACGTAGGTGGCAAGCGTTGTCCGGAATTAAGGGTGTAAAGGGAGCGTAGGCGGGAGTCAAGTGAATGTGAAAACCTA

TGGGCTCAACCCATAGTTGCGTTCAAACCTGCATTTCTTGAGTGAAGTAGAGGTAAGCGGAATTCCTAGTGTAGCGGTGA  
AATGCGTAAATATTAGGAGGAACACCAAGTGGCGAAGGCGGCTTACTGGGCTTTAACTGACGCTGAGGCTCGAAAGCGTG  
GTAGC

>ASV:2765:Family:Ruminococcaceae

TACGTAGGTGGCAAGCGTTGTCCGGATTTACTGGGTGTAAGGGCGTGCAGCCGGGAATGCAAGTCAGATGTGAAATCCA  
TGGGCTTAACCCATGAAGTGCATTTGAAACTGTTTTCTTGAGTACTGGAGAGGCAATCGGAATTCCTAGTGTAGCGGTG  
AAATGCGTAGATATCACGAAGAATCCGATCGCAAGGCATTGTGCCGGGCGAGCACTGACGCTGAGACTCGAAAGTGGC  
GGTAT

>ASV:2766:Genus:Christensenellaceae\_R-7\_group

TACGTAGGGGCGAGCGTTGTCCGGAATGACTGGGCGTAAAGGGCGTGTAGGCGGCCGATTAAGTGTGGAGTAAAAGTCC  
ACTTTTCAAGGGTGAATTGCTTTGCAGACTGTTGGCTTGAGTGGCAAGAGGTAAGTGAATTCCTAGTGTAGCGGTG  
AAATGCGTAGAGATTGGGAGGAACACCAAGTGGCGAAGGCAGCTTACTGGGCCGTAACGACGCTGAGGCGCAAAAGCGTG  
GGGAG

>ASV:2767:Class:Bacteroidia

TACGGAGGATCCGAGCGTTATCCGGATTTATTGGGTTAAAGGGAGCGTAGGCGGACGCTTAAGTCAGTTGTGAAAGTTT  
GCGGCTCAACCGTAAATTGCAAGTTGATACTGGGTGCTTGAGTACTGGAGAGGCAGACGGAATTCCTAGTGTAGCGGTG  
AAATGCGTAGATATTAGGAGGAACACCAAGTGGCGAAGGCGGCTGCTGGACGACAACGACGCTGAGGCGCAAAAGCGTG  
GGGAG

>ASV:2768:Genus:Ruminiclostridium\_9

TACGTAGGTGGCGAGCGTTATCCGGATTTACTGGGTGTAAGGGCGTGTAGGCGGGAAGGCAAGTCAGACGTGAAAACCA  
CGGGCTCAACCTGTGGCCTGCGTTTGAACCTGTTTTCTTGAGTGTGGAGAGGCAGGCGGAATTCCTAGTGTAGCGGTG  
AAATGCGTAGATATACGGAGGAACACCAAGTGGCGAAGGCGGCTGCTGGACATTAACGACGCTGAGGCGCAAAAGCGTG  
GGGAG

>ASV:2769:Family:Ruminococcaceae

TACGTAGGGAGCGAGCGTTGTCCGGAATTAAGGGAGCGTAGGCGGGAAGCAAGTTGGAAGTGAATACA  
TGGGCTTAACCCATGAGCTGCTTTCAAACCTGTTTTCTTGAGTGAAGTAGAGGCAGGCGGAATTCCTAGTGTAGCGGTG  
AAATGCGTAGATATTAGGAGGAACACCAAGTGGCGAAGGCGGCTGCTGGGCTTTAACTGACGCTGAGGCTCGAAAGCGTG  
GGTAG

>ASV:2770:Family:Clostridiaceae\_1

TACGGAGGGTGCAGCGTTAATCCGGAATAACTGGGCGTAAAGGGCACGCAGGCGGTGACTTAAGTGAAGTGTGAAATACC  
CGGGCTCAACCTGGGTGCTGCATTTCAAACCTGGAAGTCTAGAGTGCAGGAGAGGAGAATGGAATTCCTAGTGTAGCGGTG  
AAATGCGTAGAGATTAGGAAGAACACCAAGTGGCGAAGGCGGCTCCTGGGACATAACGACGCTCAGGCACGAAAGCGTG  
GGGAG

>ASV:2771:Genus:Ruminococcaceae\_UCG-010

TACGTAGGTGGCAAGCGTTATCCGGATTTACTGGGTGTAAGGGTGTGTAGGCGGGAAACAAGTCAGATGTGAAATGCC  
AAGGCTAAACCATGGAGCTGCATTTGAAACTGTTTTCTTGAGAGTGGGAGAGGTAAGCGGAATTCCTAGTGTAGCGGTG  
AAATGCGTAGATATCGGGAGGAACACCAAGTGGCGAAGGCGGCTTACTGGACCATTAACGACGCTGAGACACGAAAGCGTG  
GGGAG

>ASV:2772:Class:Bacteroidia

TACGTAGGGAGCAAGCGTTATCCGGATTTATTGGGTGTAAGGGTGCCTAGACGGGAAAATAAGTTAGTTGTGAAATCCC  
CATGCTTAACATGGAACTGCAATTAACCTGTTTTCTTGAGTGTGGAGAGGAAAGTGAATTCCTAGTGTAGCGGTG  
AAATGCTTAGATATCACGAAGAATCCGATTGCGAAGGCAGCTCACTAGACTGTTACTGACACTGATGCTCGAAAGTGTG  
GGTAT

>ASV:2773:Family:Lachnospiraceae

TACGGAGGATCCGAGCGTTATCCGGATTTACTGGGTGTAAGGGAGCGTAGACGGAGCAGCAAGTCTGATGTGAAAACCC  
GGGGCTCAACCCGGGAGTGCATTGAAACTGTTGATCTAGAGTGTGGAGAGGTAAGTGAATTCCTAGTGTAGCGGTG  
AAATGCTTAGATATCACGAAGAATCCGATTGCGAAGGCAGCTGCTAAGCTGCAACTGACATTGAGGCTCGAAAGTGTG  
GGTAT

>ASV:2774:Family:Christensenellaceae

TACGTAGGGAGCAAGCGTTGTCCGGAATTAAGGGTGCCTAGGCGGTTTTTAAAGTCAAGTGTGAAATACC  
CGGGCTTAACCCGGGGCTGCATCTGAAACTGGGAGACTTGAGTGCAGGAGAGGAAAGCGGAATTCCTAGTGTAGCGGTG  
AAATGCGTAGATATTAGGAGGAACACCAAGTGGCGAAGGCGGCTTTCTGGACTGTAACGACGCTGAGGACGAAAGCGTG  
GGGAG

>ASV:2775:Genus:Subdoligranulum

AACGTAGGGTGAAGCGTTGTCCGGAATTAAGGGTGTAAAGGGAGCGCAGGCGGACCGGCAAGTTGGAAGTAAAACCA  
TGGGCTCAACCCATGAATTGCTTTCAAACCTGCTGGCCTTGAGTAGTGCAGAGGTAGGTGGAATTCCTAGTGTAGCGGTG  
GAATGCGTAGATATCGGGAGGAACACCAAGTGGCGAAGGCGGCTTACTGGGCACCAACTGACGCTGAGGCTCGAAAGCATG  
GGTAG

>ASV:2776:Family:Ruminococcaceae

TACGTAGGTGGCGAGCGTTATCCGGAATTAAGGGTGTAAAGGGAGCGCAGGCGGGAAGACAAGTTGGAAGTGAATCCA  
TGGGCTCAACCCATGAAGTGCATTTCAAACCTGCTGGCCTTGAGTAGTGCAGAGGTAGGTGGAATTCCTAGTGTAGCGGTG  
AAATGCTTAGATATCACGAAGAATCCGATTGCGAAGGCAGCTTCTGGACTGTAACGACGCTGATGCTCGAAAGTGTG  
GGTAT

>ASV:2777:Genus:Alistipes

TACGGAGGATTAAGCGTTATCCGGATTTATTGGGTTAAAGGGTGCCTAGGCGGTTTTGATAAGTTAGAGGTGAAATTTCC  
GGGCTCAACCCCTGAACGTGCCTCTAATACTGTTGAGCTAGAGAGTAGTTGCGGTAGGCGGAATGTATGGTGTAGCGGTG  
AAATGCGTAGAGATCGGGAGGAACACCAAGTGGCGAAGGCGGCTTACTGGGCTTTAACTGACGCTGAGGACGAAAGTGGC  
GGTAT

>ASV:2778:Family:Lachnospiraceae  
TACGTATGGAGCAAGCGTTATCCGGATTTACTGGGTGTAAAGGGTGCCTAGGTGGCAGTGCAAGTCAGATGTGAAAGGCC  
GGGGCTCAACCCGGAGTTGCATTTGAAACTGCGCGGCTAGAGTACAGGAGAGGCAGCGGGAATTCCTAGTGTAGCGGTG  
AAATGCGTAGATATTAGGAGGAACACCAGTGGCGAAGGCGGCTGCTGGACTGTTACTGACACTGAGGCACGAAAGCGTG  
GGGAG

>ASV:2779:Family:Clostridiales\_vadinBB60\_group  
TACGTAGGGGGCAAGCGTTGTCCGGAATGACTGGGCGTAAAGGGAGTGTAGGTGGCATAATAAGTTATATGTGAAAGCCC  
GCGGCTCAACCTGCGAACTGCATATAAACTGTTAAGCTTGGAGTGCAGGAGAGGTAAGCGGAATTCCTAGTGTAGCGGTG  
GAATGCGTAGATATTAGGAAGAACACCAGAGGCGAAGGCGGCTTACTGGACTGTAACCTGACACTGAGGCTCGAAAGCGTG  
GGGAG

>ASV:2780:Genus:Alistipes  
TACGGAGGATCCAAGCGTTATCCGGATTTATTGGGTTTAAAGGGTGCCTAGGCGGTTTGATAAGTTAGAGGTGAAATACC  
GGGGCTCAACCTCGGAATGCCTCTAATACTGTTGAACTAGAGAGTAGTTGCGGTAGCGGGAATGTATGGTGTAGCGGTG  
AAATGCTTAGAGATCATACAGAACCAGATTGCGAAGGCAGCTTACCAAATATATCTGACGTTGAGGCACGAAAGCGTG  
GGGAG

>ASV:2781:Order:Clostridiales  
TACGTAGGGAGCAAGCGTTGTCCGGATTTACTGGGTGTAAAGGGTGCCTAGGCGGCTTTGCAAGTCAGATGTGAAATCTA  
TGGGCTCAACCCATAAACTGCCTTAACTGTTGAACTAGAGAGTAGTTGCGGTAGCGGGAATGTATGGTGTAGCGGTG  
AAATGCTTAGATATCACGAAGAACCAGATTGCGAAGGCAGCTACTGGACTGCAACTGACACTGATGCTCGAAAGGTG  
GGTAT

>ASV:2782:Family:Bifidobacteriaceae  
TACGTAGGGTGCAAGCGTTATCCGGAATTATTGGGCGTAAAGGGCTCGCAGGCGGTTGCTCGCGTCCGGTGTGAAAGTCC  
ATCGCTTAACCGTGGATCTGCGCCGGGTACGGGCGGCTGGAGTGCCTAGGGGAGACTGGAATTCCTGGTGTAAACCGTG  
AAATGCGTAGATATTAGGAGGAACACCAGTGGCGAAGGCGGCTTCTGGACGATGACTGACGTTGAGGCTCGAAAGCGTG  
GGGAG

>ASV:2783:Genus:Holdemanelle  
AACGTAGGTGGCGAGCGTTATCCGGAATGATTGGGCGTAAAGGGTGCCTAGGTGGCAGATCAAGCTGAGTAAAGGTA  
TGGGCTCAACCCGACTGGCTTGGAACTGATCAGCTAGAGAACAGAGAGACGGCGGAATTCCTAGTGTAGCGGTAA  
AATGCGTAGATATCACGAAGAACCAGATTGCGAAGGCAGCTACTGGAGTGAACCTGACGCTGATGCTCGAAAGGTG  
GTATC

>ASV:2784:Genus:Christensenellaceae\_R-7\_group  
TACGTAGGGGGCGAGCGTTGTCCGGAATGACTGGGCGTAAAGGGCGTGTAGGCGGCCGATTAAGTATGGAGTAAAGTCC  
TGCTTTCAAGGTGGGAATTGCTTTGTAGACTGGTTGGCTTGGAGTGCAGGAGAGGTAAGTGGAAATTCCTAGTGTAGCGGTG  
AAATGCGTAGAGATTGGGAGGAACACCAGTGGCGAAGGCGACTTACTGGGCCGTAACGACGCTGAGGCGCAAAGCGTG  
GGGAG

>ASV:2785:Genus:Ruminococcaceae\_UCG-007  
TACGTAGGTGGCGAGCGTTGTCCGGATTTACTGGGTGTAAAGGGCGCTAGGCGGGATAGCAAGTCAGATGTGAAATCTA  
TGGGCTTAACCCATAAACTGCATTTGAACTGTTATTTCTTGGAGTATCGGAGAGGCAGGCGGAATTCCTAGTGTAGCGGTG  
AAATGCGTAGATATTAGGAGGAACACCAGTGGCGAAGGCGGCTGCTGGACGACAACGACGCTGAGGCGCAAAGCGTG  
GGGAG

>ASV:2786:Kingdom:Bacteria  
TACGGAGGATCCGAGCGTTATCCGGATTTATTGGGTTTAAAGGGAGCGTAGATGGATGTTTAAAGTCAGTTGTGAAAGTTT  
GTGGCTCAACCGTAAATTTGACGTTGATACTGGATATCTTGGAGTACTGGAGAGGCAGACGGAATTCCTAGTGTAGCGGTG  
AAATGCGTAGATATTAGGAGGAACACCAGTGGCGAAGGCGGCTGCTGGACAGCAACGACGCTGAGGCGCAAAGCGTG  
GGGAG

>ASV:2787:Family:Peptostreptococcaceae  
TACGTAGGGGGCTAGCGTTATCCGGATTTACTGGGCGTAAAGGGTGCCTAGGTGGTTCCTTAAAGTCAGGAGTAAAGGCT  
ACGGCTCAACCGTAGTAAGCTCTTGAACCTGGGAACTTGGAGTGCAGGAGAGGAAAGTGGAAATTCCTAGTGTAGCGGTG  
AATGCTTAGATATCACGAAGAACCAGATTGCGAAGGCAGCTACTAGACTGTTACTGACACTGATGCTCGAAAGGTG  
GTATC

>ASV:2788:Genus:Clostridium\_sensu\_stricto\_1  
TACGTAGGTGGCGAGCGTTGTCCGGATTTACTGGGCGTAAAGGGAGCGTAGGCGGATTTTAAAGTGAGATGTGAAATACC  
CAGGCTCAACCTGGGGCTGCATTTCAAACCTGGAAGTCTAGAGTGCAGGAGAGGAGTGGAAATTCCTAGTGTAGCGGTG  
AAATGCGTAGAGATTAGGAAGAACACCAGTGGCGAAGGCGACTCTCTGGACTGTAACGACGCTGAGGCTCGAAAGCGTG  
GGGAG

>ASV:2789:Genus:Parasutterella  
TACGTAGGGTGCGAGCGTTAATCGGAATTAAGGCGTAAAGGGTGCAGGCGGTTGAGTAAGACAGATGTGAAATCCC  
CGAGCTTAACTCGGGAATGGCATATGTGACTGCTCGACTAGAGTGTGTCAGAGGGAGGTGGAATTCACGCTGTAGCAGTG  
AAATGCGTAGATATGTGGAAGAACACCAGTGGCGAAGGCAGCTCTCTGGACATAACGACGCTCAGGCACGAAAGCGTG  
GGGAG

>ASV:2790:Class:Bacteroidia  
TACGGAGGATCCGAGCGTTATCCGGATTTATTGGGTTTAAAGGGAGCGTAGGTGGATGTTAAGTCAGTTGTGAAAGTTT  
GCGGCTCAACCGCAAATTTGACGTTGAACTGGCAGTCTTGGAGTACAGTAGAGGTAAGCGGAATTCCTAGTGTAGCGGTG  
AAATGCGTAGATATTAGGAGGAACACCAGTGGCGAAGGCGGATTGCTGGACGACAACGACGCTGAGGCGCAAAGCGTG  
GGGAG

>ASV:2791:Genus:Lachnospiraceae\_UCG-006  
TACGTAGGGGGCAAGCGTTATCCGGATTTACTGGGTGTAAAGGGAGCGTAGACGCTGTGCAAGTTTGAAGTAAAGGCA  
AGGGCTCAACCTTTGGACTGCTTTGAAACTGTGCAGCTAGAGTGTGCGGAGAGGTAAGTGGAAATTCCTAGTGTAGCGGTG

AAATGCGTAGATATTAGGAGGAACACCAGTGGCGAAGGCGGCTTACTGGACGATGACTGACGTTGAGGCTCGAAAGCGTG  
GGAG  
>ASV:2792:Family:Lachnospiraceae  
TACGTATGGAGCAAGCGTTATCCGGATTTACTGGGTGTAAGGGTGCCTAGGTGGCAGTGCAAGTCAGATGTGAAAGGTC  
GGGGCTCAACCCGGAGCTGCATTTGAAACTGCATGGCTAGAGTACAGGAGAGGCAGGCGGAATTCCTAGTGTAGCGGTG  
AAATGCGTAGATATTAGGAGGAACACCAGTGGCGAAGGCGGCTGCTGGACTGTTACTGACACTGAGGCACGAAAGCGTG  
GGAG  
>ASV:2793:Genus:Butyricicoccus  
TACGTAGGGAGCAAGCGTTATCCGGATTTACTGGGTGTAAGGGCGTGTAGGCGGGCTTCAAGTTGGAAGTAAAATCCA  
GGGGCTTAACCCCTGAACTGCTTTCAAACCTGCGAGTCTTGAGTGTGGAGAGGCAGGCGGAATTCCTAGTGTAGCGGTG  
AAATGCGTAGATATTGGGAGGAACACCAGTGGCGAAGGCGGCTGCTGGACATTAACGACGCTGAGGCAGGCGAAAGCGTG  
GGAG  
>ASV:2794:Genus:UBA1819  
AACGTAGGGTGAAGCGTTGTCCGGAATTTACTGGGTGTAAGGGAGCGCAGGCGGATTGACAAGTTGGGAGTAAAATCTA  
TGGGCTCAACCCATAAATTGCTTTCAAACCTGTCAGTCTTGAGTGGTGTAGAGGTAGGCGGAATTCCTAGTGTAGCGGTG  
GAATGCGTAGATATCGGGAGGAACACCAGTGGCGAAGGCGGCTACTGGGCATTTACTGACGCTGAGGCTCGAAAGCATG  
GGTAG  
>ASV:2795:Family:Ruminococcaceae  
AACGTAGGTCACAAGCGTTGTCCGGAATTTACTGGGTGTAAGGGAGCGTAGGCGGGATGCCAAGTCAGCTGTGAAAACCTA  
TGGGCTTAACCTGTAGACTGCAGTTGAAACTGGTATTCTTGAGTGAAGTAGAGGTTGGCGGAATTCCTAGTGTAGCGGTG  
AAATGCGTAGATATTGGGAGGAACACCAGTGGCGAAGGCGGCTTACTGGACGTTAACGACGCTGAGGCAGGCGAAAGCGTG  
GGAG  
>ASV:2796:Genus:Ruminococcaceae\_UCG-007  
TACGTAGGTGGCAAGCGTTGTCCGGAATTTACTGGGTGTAAGGGCGCGTAGGCGGGACAGCAAGTCAGATGTGAAAATCTA  
TGGGCTTAACCCATAAAGTGCATTTGAAACTGTTGTTCTTGAGTATCGGAGAGGCAGGCGGAATTCCTAGTGTAGCGGTG  
AAATGCGTAGATATTAGGAGGAACACCAGTGGCGAAGGCGGCTGCTGGACGACAACGACGCTGAGGCAGGCGAAAGCGTG  
GGAG  
>ASV:2797:Genus:Ruminococcaceae\_NK4A214\_group  
TACGTAGGTGGCAAGCGTTATCCGGATTTACTGGGTGTAAGGGCGCGTAGGCGGGATGCCAAGTCAGATGTGAAAATCTA  
TGGGCTTAACCCATAAAGTGCATTTGAAACTGTATCTTGAGTGTGGAGAGGTAGATGGAATTCCTGTGTAGCGGTG  
AAATGCGTAGATATAAGGAAGAACACCAGTGGCGAAGGCGATCTACTGGACGTAACGACGCTGAGGCAGGCGAGAGCGTG  
GGAG  
>ASV:2798:Species:cryaerophilus/faecis/lanthieri  
TACGGGGGTGCAAGCGTTACTCGGAATCACTGGGCGTAAAGAGCATGTAGGCGGATTGATAAGTTTGAAGTAAAATCCT  
ATAGCTTAACCTATAGAACTGCTTTGAAACTGTTAATCTAGAATGTGGGAGAGGTAGATGGAATTTCTGGTGTAGGGGTA  
AAATCCGTAGAGATCAGAAGGAATACCGATTGCGAAGGCGATCTACTGGAACATTATTGACGCTGAGATGCGAAAGCGTG  
GGAG  
>ASV:2799:Class:KD4-96  
TACGTAGGTGGCAAGCGTTGTCCGGAATTTACTGGGCGTAAAGAGCGCGCAGGCGGTCGATTTAGTCGCGTGTGAAAGCCC  
CCGGCTCAACTGGGAGGGTACGCGATACTGATCGACTCGAAGGCAGGAGAGGGTAGTGGAAATTCCTAGTGTAGCGGTG  
AAATGCGTAGATATCGGGAGGAACACCAGTGGCGAAGGCGACTACCTGGCCTGTTCTTGACGCTGAGGCAGGCGAAAGCTAG  
GGAG  
>ASV:2800:Species:aerilata  
TACGTAGGGTGAAGCGTTAATCGGAATTTACTGGGCGTAAAGCGTGCAGGCGGTTTTGTAAGTCTGTGCGTAAAAGCCC  
CGGGCTTAACCTGGGAATTGCGATGGAGACTGCAAGGCTTGAATCTGGCAGAGGGGGTAGAATTCACGCTGTAGCAGTG  
AAATGCGTAGAGATGTGGAGGAACACCAGTGGCGAAGGCGAGCCCTGGGTCAAGATTGACGCTCATGCACGAAAGCGTG  
GGAG  
>ASV:2801:Genus:Intestinimonas  
TACGTAGGTGGCGAGCGTTATCCGGATTTACTGGGTGTAAGGGCGTGTAGGCGGGAAGGCAAGTCAGATGTGAAAACCTA  
TGGGCTCAGCCATAGCCTGCATTTGAAACTGTTTTCTTGAGTGTGGAGAGGCAATCGGAATTCCTGTGTAGCGGTG  
AAATGCGTAGATATACGGAGGAACACCAGTGGCGAAGGCGGATTGCTGGACGACAACGACGCTGAGGCAGGCGAAAGCGTG  
GGAG  
>ASV:2802:Genus:Lachnospira  
TACGTATGGAGCAAGCGTTATCCGGATTTACTGGGTGTAAGGGAGTGTAGGTGGCCATGCAAGTCAGAAGTAAAATCC  
GGGGCTCAACCCAGGAAGTGTGTTTCAAACCTGTAAGGCTGGAGTGCAGGAGGGGTGAGTGGAAATTCCTAGTGTAGCGGTG  
AAATGCGTAGATATTAGGAGGAACACCAGTGGCGAAGGCGGCTCACTGGACTGTAACGACACTGAGGCTCGAAAGCGTG  
GGAG  
>ASV:2803:Genus:Bacteroides  
TACGTAGGTGGCAAGCGTTGTCCGGAATTTACTGGGTGTAAGGGAGCGTAGGCGGATTGTTAAGTCAGTTGTGAAAAGTTT  
GCGGCTCAACCGTAAAATTGCAAGTGTACTGGCAGTCTTGAGTGCAGTAGAGGTGGGCGGAATTCCTGGTGTAGCGGTG  
AAATGCTTAGATATCGGAAGAACTCCGATTGCGAAGGCGAGTCACTGGAGTGAACGACGCTGATGCTCGAAAGTGTG  
GGTAT  
>ASV:2804:Genus:GCA-900066225  
TACGTAGGTGGCAAGCGTTGTCCGGAATTTACTGGGTGTAAGGGAGCGTAGGCGGGAAGCAAGTTGGGAGTAAAATGTA  
TGGGCTCAACCCATAAAGTGCATTTCAAACCTGTTTTCTTGAGTGAAGTAGAGGCAGGCGGAATTCCTAGTGTAGCGGTG  
AAATGCGTAAATATTAGGAGGAACACCAGTGGCGAAGGCGGCTGCTGGGCTTTAACGACGCTGAGGCTCGAAAGCGTG  
GGTAG  
>ASV:2805:Species:cellulasensis/halosaccharovorans/licheniformis/niabensis/zhanjiangensis

TACGTAGGTGGCAAGCGTTGTCCGGAATTATTGGGCGTAAAGCGCGCAGGCGGTTTCTTAAGTCTGATGTGAAAAGCCC  
ACGGCTCAACCGTGGAGGGTATTGAAAAGCTGGGAACTTGAGTGCAGAAGAGGAGAGTGAATTCCACGTGTAGCGGTG  
AATGCGTAGATATGAGGAAACACCAAGTGGCGAAGGCGACTCTCTGGTCTGTAACGACGCTGAGGCGCAAAGCGTG  
GGGAG

>ASV:2806:Genus:CAG-56

TACGTAGGGGGCAAGCGTTATCCGGATTTACTGGGTGTAAAGGGAGCGTAGACGGCGAGGCAAGTCTGATGTGAAAACCC  
GGGGCTCAACCCCGTACTGCATTGAAAAGCTGTTTCTTGGTGCAGGAGAGGTAAGCGGAATTCCTAGTGTAGCGGTG  
AATGCGTAGATATCACGAAGAAGTCCGATTGCGAAGGCGAGCTGCTAAGCTGCAACTGACATTGAGGCTCGAAAAGTGTG  
GGTAT

>ASV:2807:Family:Family\_XIII

TACGTAGGGGGCAAGCGTTATCCGGATTTACTGGGCGTAAAGAGTGCCTAGGTGGTTACCTAAGCGCAGGGTATAAGGCA  
ATGGCTCAACCATTTGTTGGCCCTGCGAACTGGGCTACTTGAGTGCAGGAGAGGAAAGCGGAATTCCTAGTGTAGCGGTG  
AATGCGTAGATATTAGGAGGAACACCAAGTGGCGAAGGCGGCTTTCTGGACTGTAACGACACTGAGGCACGAAAAGCGTGG  
GGAG

>ASV:2808:Genus:Ruminiclostridium\_9

TACGTAGGTGGCAAGCGTTATCCGGATTTACTGGGTGTAAAGGGCGTGTAGGCGGGAGAGCAAGTGCAGATGTGAAAACCTA  
TGGGCTTAACCCATAGCCTGCATTTGAAAAGCTTCTTCTTGGTGCAGGAGAGGCAAGCGGAATTCCTAGTGTAGCGGTG  
AATGCGTAGATATTAGGAGGAACACCAAGTGGCGAAGGCGGCTTCTGGACTGTAACGACACTGAGGCTCGAAAAGCGTGG  
GGAG

>ASV:2809:Genus:Flavonifractor

TACGTAGGTGGCAAGCGTTATCCGGATTTACTGGGTGTAAAGGGCGTGTAGGCGGGACTGCAAGTCAAGGCGTAAAACCA  
GAGGCTCAACCTCTGGCCTGCGTTTGAAGCTGAGTCTTGGTGCAGGAGGCAATCGGAATTCCTGTGTAGCGGTG  
AATGCGTAGATATACGGAGGAACACCAAGTGGCGAAGGCGGATTGCTGGACAGTAACGACGCTGAGGCGCAAAGCGTGG  
GGAG

>ASV:2810:Species:wiggisiae

TACGTAGGGTGGCAAGCGTTGTCCGGAATTATTGGGCGTAAAGGGCTCGTAGGCGGTTTGTGGCTCTGGTGTGAAAAGCTT  
ACTGCTTAACGGTAGTTGCGCTGGATACGGGCGAGGCTTGGTGCAGTAGGGGAGACTGGAATTCCTGGTGTAAAGCGTGG  
AATGCGTAGATATCGGGAAGAACACCTATGGCGAAGGCGAGTCTCTGGGCTGTTACTGACGCTGAGGAGCGAAAAGCGTGG  
GGAG

>ASV:2811:Family:Lachnospiraceae

TACGTAGGGGGCAAGCGTTATCCGGATTTACTGGGTGTAAAGGGAGCGTAGACGGTACTGTAAGTCTGAAGTGAAAGCCC  
CGGGCTCAACTGCGGACTGCTTTGAAAAGCTGAACTAGAGTGTGCGAGAGGTAAGTGAATTCCTAGTGTAGCGGTG  
AATGCGTAGATATTAGGAGGAACACCAAGTGGCGAAGGCGACTTACTGGACGATAACTGACGTTGAGGCTCGAAAAGCGTGG  
GGAG

>ASV:2812:Family:Ruminococcaceae

TACGTAGGGAGCGAGCGTTGTCCGGAATTACTGGGTGTAAAGGGTGCCTAGGCGGGTTTGAAGTCAAGGCGTAAAATACC  
GAGGCTCAACTTCGGAGCTGCGCTTGAAGCTGAGACTTGGTGAAGTAGAGGCAAGCGGAATTCCTAGTGTAGCGGTG  
AATGCGTAGATATTAGGAGGAACACCAAGTGGCGAAGGCGGCTTCTGGCTTAACTGACGCTGAGGCACGAAAAGCATG  
GGAG

>ASV:2813:Species:formosensis/garvieae/lactis

TACGTAGGTCCCAAGCGTTGTCCGGAATTATTGGGCGTAAAGCGAGCGCAGGTGGTTTCTTAAGTCTGATGTAAAAGGCA  
GTGGCTCAACTTCGGAGCTGCGCTTGAAGCTGAGACTTGGTGAAGTAGAGGCAAGCGGAATTCCTAGTGTAGCGGTG  
AATGCGTAGATATTAGGAGGAACACCGAGGCGAAAAGCGGCTCTCTGGCTTAACTGACGCTGAGGCACGAAAAGCATG  
GGAG

>ASV:2814:Order:Mollicutes\_RF39

TACGTAGGTGGCGAGCGTTATCCGGATTTATTGGGCGTAAAGGGTGCAGACGGTTTATTAAGTCTAAAATCAAATCTT  
GGGGCTTAACCCATTCCGTTTTAGAACTGGTAGACTTGGTGAAGTAGAGGCAAGTGAATTCCTAGTGTAGCGGTGG  
AATGCGTAGATATTAGGAGGAACACCAAGTGGCGAAGGCGATTGCTGGGCCATTACTGACGTTAGGCACGAAAAGCGTGG  
GGAG

>ASV:2815:Family:Lachnospiraceae

TACGTATGGTGGCGAGCGTTATCCGGATTTACTGGGTGTAAAGGGAGCGCAGGCGGTGCGGCAAGTCTGATGTGAAAAGCCC  
GGGGCTCAACCCCGTACTGCATTGAAAAGCTGCTGACTAGAGTGTGCGAGGGTAAGCGGAATTCCTAGTGTAGCGGTG  
AATGCGTAGATATCACGAAGAAGTCCGATTGCGAAGGCGAGCTACTGGAGTGAACGACGCTGATGCTCGAAAAGTGTG  
GGTAT

>ASV:2816:Genus:Gordonibacter

TACGTAGGGGGCGAGCGTTATCCGGATTTACTGGGCGTAAAGCGCGCTAGGCGGCCGTCAAGCGGAACCTCTAACCCG  
AGGGCTCAACCCCGGCGGGTTCCGAACTGGCAGGCTCAGTTTGGTAGAGGAAGTGAATTCCTAGTGTAGCGGTGG  
AATGCGCAGATATCGGGAAGAACACCGATGGCGAAGGCGAGTCTCTGGGCCGACTGACGCTGAGGCGCAAAGCTGGG  
GGAG

>ASV:2817:Order:Bacteroidales

TACGGAGGATCCGAGCGTTATCCGGATTTATTGGGTTTAAAGGGTGCAGACGGGAGATTAAGTCAAGTGTGAAAAGTTT  
GCGGCTCAACCGTAAAATTGCAAGTTGATACTGGTTTCTTGGTGCAGTTGAGGCGAGGCGGAATTCCTAGTGTAGCGGTG  
AATGCGTAGATATTAGGAGGAACACCAAGTGGCGAAGGCGGCTTACTGGACGTTAACTGACGTTGAGGCTCGAAAAGCGTGG  
GGAG

>ASV:2818:Species:hokkaidonensis/manihotivorans/vaccinostercus/wasatchensis

TACGTAGGTGGCAAGCGTTATCCGGATTTATTGGGCGTAAAGCGAGCGCAGGCGGTTTTTAAAGTCTGATGTGAAAAGCTT  
TCGGCTTAACCGAAGAAGTGCATCGGAACTGGGAACTTGAGTGCAGAAGAGGACAGTGAAGTCCATGTGTAGCGGTG  
AATGCGTAGATATTGGAAGAACACCAAGTGGCGAAGGCGGCTGCTGGTCTGTAACGACGCTGAGGCTCGAAAAGCATG



GGTAG

>ASV:2819:Class:Bacteroidia

TACGGAGGATCCAAGCGTTATCCGGATTTATTGGGTTTAAAGGGTTCGTAGGCGGTTTTATAAGTTAGAGGTTAAATATC  
GGAGCTTAACTCCGTTATGCCCTCTAATACTGTAGGACTAGAGAATAGTTGCGGTAGGCGGAATGTATGGTGTAGCGGTGA  
AATGCGTAGAGATCGGGAGGAACACCAGTGGCGAAGGCGCCTACTGGGCTTAACTGACGCTGAGGCACGAAAGCATGG  
GTAGC

>ASV:2820:Genus:Blautia

TACGTAGGGGGCAAGCGTTATCCGGATTTACTGGGTGTAAGGGGAGCGTAGACGGAGTGGAAGTCTGATGTGAAAGGCG  
GGGGCTCAACCCTGGACTGCATTGGAACTGTCACTCTGAGTGCCGGAGAGGTAAGCGGAATTCCTAGTGTAGCGGTG  
AAATGCGTAGATATTAGGAGGAACACCAGTGGCGAAGGCGGCTTACTGGACGGTAACGACGTTGAGGCTCGAAAGCGTG  
GGGAG

>ASV:2821:Genus:Asaccharospora

TACGGAGGATCCGAGCGTTATCCGGATTTATTGGGTTTAAAGGGAGCGTAGGCGGACGCTTAAAGTCACTGTGAAAGTTT  
GCGGCTCAACCCTAGTAAGCTCTTGAAGTGGGGACTTGAGTGACGAGAGGAGAGTGAATTCCTAGTGTAGCGGTGA  
AATGCGTAGATATTAGGAGGAACACCAGTGGCGAAGGCGGCTCTCTGGACTGTAACGACGCTGAGGCACGAAAGCGTG  
GGAGC

>ASV:2822:Genus:Sutterella

TACGTAGGGTGCAAGCGTTAATCGGAATTACTGGGCGTAAAGCGTGCGCAGGCGGTTCTGTAAGACAGATGTGAAATCC  
CGGGCTCAACCTGGGAATGGCATTGTGACTGCAGGACTAGAGTTTATCAGAGGGGGTGAATTCAGTGTAGCAGTG  
AAATGCGTAGATATTTGGAAGAACACCAATGGCGAAGGCGGCTTCTGGACTGTAACGACGCTCATGCACGAAAGCGTG  
GGGAG

>ASV:2823:Family:Peptostreptococcaceae

TACGTAGGGGGCAAGCGTTATCCGGATTTACTGGGCGTAAAGGGTGCGTAGGCGGTAATATAAGTTGGAGTTTTAAACCA  
TGGGCTCAACCCTAGTCAAGCTCCAAAAGTATAACTTGTAGTACTGGAGAGGAAAGTGAATTCCTAGTGTAGCGGTGA  
AATGCGTAGATATTAGGAGGAATACCGTGGCGAAGGCGGCTTCTGGACAGTAACTGACGCTGAGGCACGAAAGCGTG  
GTAGC

>ASV:2824:Order:Bacteroidales

TACGGAGGATCCGAGCGTTATCCGGATTTATTGGGTTTAAAGGGAGCGTAGGTGGACTGGTAAGTCACTGTGAAAGTTT  
GCGGCTCAACCCTGAAATGCACTGTGATACTGTCACTCTGAGTACAGTAGAGGTGGCGGAATTCGTGGTGTAGCGGTG  
AAATGCGTAGAGATCGGGAGGAACACCAGTGGCGAAGGCGGCTTACTGGGCTTAACTGACGCTGAAGCACGAAAGCATG  
GGCAG

>ASV:2825:Genus:DNF00809

TACGTAGGGGGCGAGCGTTATCCGGATTTACTGGGCGTAAAGCGCGCGTAGGCGGCGCAGCGGAAGCGGAACCTCTAACCTC  
GGGGCTCAACCTCGAGCGGGTCCGAACTGGCGGCTCGAGTTCGGTAGAGGCAGGCGGAATTCCTGGTGTAGCGGTGG  
AATGCGCAGATATCGGAAGAACACCAGTGGCGAAGGCGGCTGCTGGGCCGACACTGACGCTGAGGTGCGAAAGCTAGG  
GGAGC

>ASV:2826:Family:Lachnospiraceae

TACGTATGGTGCAAGCGTTATCCGGATTTACTGGGTGTAAGGGGAGCGTAGACGGAGTGGAAGTCTGGAGTAAAACCC  
AGGGCTCAACCTGGGACTGCTTTGAAACTGTCAATCTAGAGTGTGGAGAGGTAAAGTGAATTCCTAGTGTAGCGGTG  
AAATGCGTAGATATTAGGAGGAACATCAGTGGCGAAGGCGGCTTACTGGACAGTGACTGACGTTGAGGCTCGAAAGCGTG  
GGGAG

>ASV:2827:Genus:Bacteroides

TCCTTCTTCTCTCTCTTTCTCTTCTTCTTGGGTTTAAAGGGAGCGTAGATGGATGTTTAAAGTCACTGTGAAAGTTT  
GCGGCTCAACCCTGAAATGCACTGTGATACTGGATATCTTGTAGTGCAGTTGAGGCAGGCGGAATTCGTGGTGTAGCGGTG  
AAATGCTTAGATATCAGGAAGAACTCCGATTGCGAAGGCGGCTGCTAAGCTGCAACTGACATTTGAGGCTCGAAAGTGTG  
GGTAT

>ASV:2828:Family:Ruminococcaceae

TACGTAGGTGGCGAGCGTTGTCCGGAATTACTGGGTGTAAGGGGAGCGTAGGCGGGTGTGCAAGTTGAATGTGAAAGGTA  
TCAGCTCAACTGATACATGCGATCAAACTGCAGATCTTGTAGTGAAGTAGAGGCAGGCGGAATTCCTAGTGTAGCGGTAA  
AATGCGTAGATATTAGGAGGAACACCAGTGGCGAAGGCGGCTGCTGGGCTTAACTGACGCTGAGGCTCGAAAGTGTGG  
GGAGC

>ASV:2829:Species:curtisii

TACGTAGGGCGCGAGCGTTGTCCGATTTATTGGGCGTAAAGAGCTCGTAGGTGTTCTGTCGCTGTGCGTAAAGCCA  
GCAGCTTAACTGTTGTCTGCGGTGGGTACGGGCGGCTTGTAGTGCAGTGGAGGAGGAGTGAATTCCTGGTGTAGCGGTG  
GAATGCGCAGATATCAGGAGGAACACCAGTGGCGAAGGCGGCTCACTGGGCGTTACTGACACTGAGGAGCGAAAGCGTG  
GGGAG

>ASV:2830:Family:Lachnospiraceae

TACGTATGGAGCAAGCGTTATCTGGATTTACTGGGTGTAAGGGGAGTGTAGGTGGCCATGCAAGTCATAAGTAAAATCC  
GGGGCTCAACCCTGGAACTGCTTTTGAAGTGAAGGCTGGAGTGCAGGAGGGGTGAGTGAATTCCTAGTGTAGCGGTG  
AAATGCGTAGATATTAGGAGGAACACCAGTGGCGAAGGCGGCTCACTGGACTGTAACGACACTGAGGCTCGAAAGCGTG  
GGGAG

>ASV:2831:Family:Ruminococcaceae

TACGTAGGGAGCGAGCGTTGTCCGGAATCACTGGGTGTAAGGGTGCAGGCGGGAACGCAAGTTGGATGTGAAAACCTA  
TGGGCTTAACTCATAAAGTGCATCCAAAAGTGCAGTCTTGTAGTGAAGTAGAGGTAGGCGGAATTCCTAGTGTAGCGGTG  
AAATGCGTAGATATTAGGAGGAACACCAGTGGCGAAGGCGGCTCACTGGGCTTAACTGACGCTGAGGCACGAAAGCATG  
GGTAG

>ASV:2832:Genus:Negativibacillus

TACGTAGGTGGCAAGCGTTGTCCGGAATTACTGGGTGTAAGGGGAGCGTAGGCGGGGAGACAAGTTGAATGTTTAAACTA

TCGGCTTAAGTATAGTGCAGTTCAAAACATCACTCTTGTAGTGCAGTAGAGGTAGGCGGAATTCCTAGTGTAGCGGTGA  
AATGCGTAGATATTAGGAGGAACACCAAGTGGCGAAGGCGGCCTACTGGGCTGTAAGTACGCTGAGGCTCGAAAGCGTGG  
GTAGC  
>ASV:2833:Genus:Butyricimonas  
TACGGGGGATGCGAGCGTTATCCGGATTTATTGGGTTTAAAGGGCGCGTAGGCGGGGCGCAAGTCAGCGGTAAAAGACT  
GCAGCTAAACTGTAGCACGCCGTTGAAACTGGCGCCCTAGAGAGAAGTCGAGGGAGGCGGAACAAGTGAAGTAGCGGTGA  
AATGCATAGATACCTTGAACCCCGATAGCGAAGGCAGCTTCCAGCCTTTATCTGACGCTGATGCGCGAGAGCGTGG  
GTAGC  
>ASV:2834:Order:Absconditabacteriales\_(SR1)  
TACGTAGGTCTCGAGCGTTATCCGGAATTACTGGGCGTAAAGCGTCTGTAGCCGGATGTATAAGTCTGTCTTTAAATACT  
CCGATTC AACTCGGAGAAAAGGATAGATACTGTATATCTAGAGGATTTAGAGGTTAGTGGAAATTCGGTGGAGCGGTG  
AAATGCGTTGATATCGGAAGGAATGCCGAAAGCGAAAGCAGCTAACTATAAAATAACTGACGGTCAGAGACGAAAGCTG  
GGGAG  
>ASV:2835:Family:Sphingomonadaceae  
TACGGAGGGGCTAGCGTTGTTCCGGAATTACTGGGCGTAAAGCGCACGTAGGCGGCTTTGTAAGTCAGGGGTGAAATCCC  
GGAGCTCAACTCCGGAAGTGCCTTGGAGACTGCAAGGCTCGAATCCAGGAGAGGTGAGTGGAAATTCAGGTGTAGAGGTG  
AAATTCGTAGATATTCGGAAGAACACCAAGTGGCGAAGGCGGCTACTGGACTGGTATTGACGCTGAGGTGCGAAAGCGTG  
GGGAG  
>ASV:2836:Genus:Blautia  
TACGTAGGGGCGAGCGTTATCCGGATTTACTGGGTGTAAGGGAGCGTAGACGGCGCAGCAAGTCTGATGTGAAAGGCG  
GGGGTTAACCCCGACTGCATTGGAAGTGTGAGCTTGTAGTGCAGGAGGGGTAAGCGGAATTCCTAGTGTAGCGGTG  
AAATGCGTAGATATTAGGAGGAACACCAAGTGGCGAAGGCGGCTACTGGACGTAAGTACGCTTGGGCTCGAAAGCGTG  
GGGAG  
>ASV:2837:Family:Ruminococcaceae  
TACGTAGGTGCAAGCGTTGTCCGGATTTACTGGGTGTAAGGGAGCGTAGGCGGGATGGCAAGTCAGATGTGAAAACCTA  
TGGGCTCAACCCATAGACTGCATTTGAAACTGTTGTTCTTGTAGTGAAGTGAAGGTAAGCGGAATTCCTGGTGTAGCGGTG  
GAATGCGTAGATATTCGGAAGAACACCAAGTGGCGAAGGCGGCTACTGGCACCAACTGACGCTGAGGCTCGAAAGTGTG  
GGTAG  
>ASV:2838:Genus:Agathobacter  
TACGTATGGTGCAGCGTTATCCGGATTTACTGGGTGTAAGGGAGCGCAGGCGGTGCGGCAAGTCTGATGTGAAAGCCC  
GGGGCTCAACCCCGTACTGCATTGGAAGTGTGCTACTAGAGTGTGCGGAGGGGTAAGCGGAATTCCTAGTGTAGCGGTG  
AAATGCGTAGATATTAGGAGGAACACCAAGTGGCGAAGGCGGCTGCTGGGCTTAACTGACGCTGAGGCACGAAAGCATG  
GGGAG  
>ASV:2839:Genus:Lachnospiraceae\_UCG-010  
TACGTAGGGGCAAGCGTTATCCGGAATTACTGGGTGTAAGGGAGAGTAGGCGGCAATTTAAGCCAGATGTGAAAGCCT  
ATGGCTTAACCGTAGGATTGCATTTGAAACTAAGTAGCTAGAGTACAGGAGAGGAAAGCGGAATTCCTAGTGTAGCGGTG  
AAATGCGTAGATATTAGGAAGAACACCAAGTGGCGAAGGCGGCTTTCTGGACTGAAACTGACGCTGAGGCTCGAAAGCGTG  
GGGAG  
>ASV:2840:Genus:Roseburia  
TACGTATGGTGCAGCGTTATCCGGATTTACTGGGTGTAAGGGAGCGCAGGCGGTGCGGCAAGTCTGATGTGAAAGCCC  
GGGGCTCAACCCCGTACTGCATTGGAAGTGTGCGACTAGAGTGTGCGGAGGGGTAAGTGGAAATTCCTAGTGTAGCGGTG  
AAATGCGTAGATATCACGAAGAACCTCGATTGCGAAGGCAGCCTGCTAAGCTGCAACTGACATTGAGGCTCGAAAGTGTG  
GGTAT  
>ASV:2841:Family:Ruminococcaceae  
TACGTAGGGAGCGAGCGTTGTCCGGATTTACTGGGTGTAAGGGTGCCTAGGCGGGATGGCAAGTCAGATGTGAAATACC  
GGGGCTCAACCCCGAGCTGCATTTGAAACTGTGCTTCTTGTAGTGAAGTGAAGGCAGGCGGAATTCCTAGTGTAGCGGTG  
AAATGCGTAGATATTAGGAGGAACACCAAGTGGCGAAGGCGGCTGCTGGGCTTAACTGACGCTGAGGCACGAAAGCATG  
GGGAG  
>ASV:2842:Order:Bacteroidales  
TACGGAGGATCCGAGCGTTATCCGGATTTATTGGGTTTAAAGGGTGCCTAGGCGGCCTTTAAGTCAGCGGTGAAAGTCT  
GTGGCTCAACCATAGAATTGCCGTTGAAACTGGGGGCTTGTAGTATGTTTGGAGCAGGCGGAATTCCTGTGTAGCGGTG  
AAATGCGTAGATATTAGGAGGAACACCAAGTGGCGAAGGCGGCTGCTGGACATTAAGTACGCTGAGGCGCGAAAGCGTG  
GGGAT  
>ASV:2843:Genus:Ruminococcus\_1  
TACGTAGGGAGCGAGCGTTGTCCGGAATTACTGGGTGTAAGGGAGCGTAGGCGGGATCGCAAGTCAGATGTGAAAACCTA  
TGGGCTTAACCCATAAACTGCATTTGAAACTGTGTTCTTGTAGTGAAGTGAAGGTAAGCGGAATTCCTAGTGTAGCGGTG  
AAATGCGTAGATATTAGGAGGAACACCAAGTGGCGAAGGCGGCTGCTGGGCTTAACTGACGCTGAGGCTCGAAAGTGTG  
GGGAG  
>ASV:2844:Family:Lachnospiraceae  
TACGTAGGGGCAAGTGTATCCGGATTTACTGGGTGTAAGGGAGCGTAGACGGAATGGCAAGTCTGATGTGAAAGGCC  
GGGGCTCAACCCCGGACTGCATTGGAAGTGTCAACTAGAGTACCAGGAGGGTAAGTGGAAATTCCTAGTGTAGCGGTG  
AAATGCGTAGATATTAGGAGGAACACCAAGTGGCGAAGGCGGCTACTGGACGGTAACTGACGTTGAGGCTCGAAAGCGTG  
GGGAG  
>ASV:2845:Species:corporis  
TACGGAAAGGTCGGGCGTTATCCGGATTTATTGGGTTTAAAGGGAGTGTAGGCGGCTGTTAAGCGTGTGTGAAATGTA  
GATGCTCAACATCTGAAGTGCAGCGCAACTGGCTGGCTTGTAGTACACGCAACTGGGCGGAATTCATGGTGTAGCGGTG  
AAATGCTTAGATATCATGAGGAACCTCAATTGCGAAGGCAGCTCACGGGAGTGTCACTGACGCTTAAAGTCTGAAAGTGTG  
GGTAT

>ASV:2846:Genus:Erysipelatoclostridium  
TACGTAGGTGGCAAGCGTTACCCGGAATTTATGGGCGTAAAGAGGGAGCAGGCGGGCAAAGGTCTGTGGTGAAAGACT  
GAAGCTTAACCTCAGTAAGCCATAGAAACCGGGCGGTAGAGTGCAGGAGAGGATCGTGAATTCATGTGTAGCGGTGA  
AATGCGTAGATATATGGAGGAACACCAGTGGCGAAGGCGACGGTCTGGCCTGTAACCTGACGCTCATTCCGAAAGCGTGG  
GGAGC

>ASV:2847:Genus:Alistipes  
TACGGAGGATTCAAGCGTTATCCGGATTTATTGGGTTTAAAGGGTGCCTAGGCGGTTTGATAAGTTAGAGGTGAAATCCC  
GGGGCTTAACCTCCGGAACCTCCTAATACTGTTAGACTAGAGAGTAGTTGCGGTAGGCGGAATGTATGGTGTAGCGGTG  
AAATGCGTAGAGATCGGGAGGAACACCAGTGGCGAAGGCGGCTACTGGGCACCAACTGACGCTGAGGCTCGAAAGTGTG  
GGTAG

>ASV:2848:Order:Bacteroidales  
TACGGAGGATCCGAGCGTTATCCGGATTTATTGGGTTTAAAGGGAGCGTAGGCGGGAGTCAAGTCAGTTGTGAAAAGCC  
ACGGCCCAACCTCGGTGGTGCAGTTGAAACTGGTTCCTTGGTGCACAGGAGCGGTGGAATTCGTGGTGTAGCGGTG  
AAATGCTTAGATATCAGGAAGAACTCCGATTGCGAAGGCAGCACACTAAGCCGTAACCTGACGTTCTGCTCGAAAGTGTG  
GGTAT

>ASV:2849:Family:Clostridiales\_vadinBB60\_group  
TACGTAGGTAGCAAGCGTTGTCCGGAATGACTGGGCGTAAAGGGTGCCTAGGTGGCTGAGCAAGTTGGTAGTGAATCCC  
GAGGCTTAACCTCGGCCTACTACCAAGACTGCCCGCTTGGTACTAGAGTACAGGAGAGGTAAGTGAATTCCTAGTGTAGCGGTG  
GAATGCGTAGATATTAGGAGGAACACCAGTGGCGAAGGCAGCTTACTGGCCTGCAACTGACACTGAGGCACGAAAGCGTG  
GGGAG

>ASV:2850:Family:Pasteurellaceae  
TACGGAGGGTGCAGCGTTAATCGGAATAACTGGGCGTAAAGGGCACGAGGCGGTGACTTAAGTGAGGTGTGAAAAGCCC  
CGGGCTTAACCTGGGAATTGCATTTCACTAGGTCCTAGAGTACTTTAGGGAGGGGTAGAATTCACGCTGTAGCGGTG  
AAATGCGTAGATATATGGAGGAACACCAGTGGCGAAGGCGGCTTACTGGACGGTAACCTGACGTTGAGGCTCGAAAGCGTG  
GGGAG

>ASV:2851:Genus:Faecalitalea  
TACGTAGGTGGCAAGCGTTATCCGGAATGATTGGGCGTAAAGGGTGCCTAGGTGGTGCATTAAGTCTGAAGTAAAAGCCA  
GCAGCTCAACCTGGAAGTTGAAACTGGTGTACTAGAGTGCAGGAGAGGGTGAAGTGAATTCATGTGTAGCGGTAA  
AATGCGTAGATATATGGAGGAACACCAGTGGCGAAGGCGGCTGCTGGCCTGTAACCTGACACTGAGGCACGAAAGCGTGG  
GGAGC

>ASV:2852:Species:massiliensis/missouriensis  
TACGGAGGGGCTAGCGTTGTTCCGGAATTAAGGGTGCCTAGGCGGATTGGAAGTCAGAGGTGAAATCCC  
AGGGCTCAACCTGGAAGTGCCTTTGAAACTCCAGTCTTGGAGTGCAGAGAGGTGAGTGAATTCGAGTGTAGAGGTG  
AAATCGTAGATATTCGAGGAACACCAGTGGCGAAGGCGGCTACTGGCTCGATACTGACGCTGAGGTGCGAAAGCGTG  
GGGAG

>ASV:2853:Genus:Flavonifractor  
TACGTAGGTGGCAAGCGTTATCCGGATTTATTGGGTGTAAGGGCGTGTAGGCGGGACTGCAAGTCAGATGTGAAAACCA  
TGGGCTCAACCCATGGCCTGCATTTGAAACTGTAGTTCTTGGTGCAGAGAGGCAATCGGAATTCGTTGTGTAGCGGTG  
AAATGCGTAGATATACGGAGGAACACCAGTGGCGAAGGCGGATTGCTGGACAGTAACCTGACGCTGAGGCGCGAAAGCGTG  
GGGAG

>ASV:2854:Genus:Coprococcus\_3  
TACGTAGGATGCAAGCGTTATCCGGATTTACTGGGTGTAAGGGAGCGTAGACGGCTGTGTAAGTCTGAAGTAAAAGCCC  
GGGGCTCAACCCCGGACTGCTTTGAAACTATGCAGCTAGAGTGTGCGGAGAGGTAAGTGAATTCAGTGTAGCGGTG  
AAATGCTTAGATATCAGGAAGAACTCCGATTGCGAAGGCAGCTGCTAAGCTGCAACTGACATTGAGGCTCGAAAGTGTG  
GGTAT

>ASV:2855:Family:Lachnospiraceae  
TACGTATGGTGCAGCGTTATCCGGATTTACTGGGTGTAAGGGTGCCTAGGTGGCAGTGCAGTGCAGATGTGAAAAGCC  
GGGGCTCAACCCCGGAGCTGCATTTGAAACTGCTCGGCTAGAGTACAGGAGAGGCAGGCGGAATTCCTAGTGTAGCGGTG  
AAATGCGTAGATATCGGGAGGAACACCAGTGGCGAAGGCGGCTACTGGGCACCAACTGACGCTGAGGCTCGAAAGTGTG  
GGTAG

>ASV:2856:Genus:Alistipes  
AACGTAGGGTGCAGCGTTATCCGGATTTATTGGGTTTAAAGGGTGCCTAGGCGGTTTGATAAGTTAGAGGTGAAATGCC  
GGTGTCTAACACCGGAACCTCCTAATACTGTTGAACTAGAGAGTAGTTGCGGTAGGCGGAATGTATGGTGTAGCGGTG  
AAATGCTTAGAGATCATAACAGAACACCAGTGGCGAAGGCAGCTTACTAACCTGTAACCTGACATTGATGCTCGAAAGTGTG  
GGTAT

>ASV:2857:Family:Lachnospiraceae  
TACGTATGGAGCAAGCGTTATCCGGATTTACTGGGTGTAAGGGAGCGTAGACGGTTTGACAAGTCTGATGTGAAATCCC  
AGGGCTTAACCTGGACCTGCATTTGAAACTGCTCGGCTAGAGTGTGCGGAGAGGTGAGTGAATTCCTAGTGTAGCGGTG  
AAATGCGTAGATATTAGGAGGAACACCAGTGGCGAAGGCGGCTACTGGACGATAACTGACGTTGAGGCTCGAAAGCGTG  
GGGAG

>ASV:2858:Genus:Mogibacterium  
TACGTAGGGGGCAAGCGTTATCCGGAATTTATGGGCGTAAAGAGTGCCTAGGTGGTTATCTAAGCGTAAGGTTTAAAGCGT  
GCAGCTCAACTGCATCTCGCTTGCAGAACTGGATTACTTGGTGCAGGAGGGGAAAGCGGAATTCCTAGTGTAGCGGTGA  
AATGCGTAGATATTAGGAGGAACACCAGCGGCGAAGGCGGCTTCTGGACTGTAACCTGACACTGAGGCACGAAAGCGTGG  
GGAGC

>ASV:2859:Genus:Blautia  
TACGTAGGGGGCAAGCGTTATCCGGATTTACTGGGTGTAAGGGAGTGTAGACGGTGTGGAAGTCTGATGTGAAAAGCCA  
TGGGCTCAACCTGTGGACTGCATTTGAAACTGTCATACTTGGTGCAGGAGGGGTAAGCGGAATTCCTAGTGTAGTGGTGT

AAATGCGTAGATATTAGGAGGAACACCAGTGGCGAAGGCGGCTTACTGGACGGTAACTGACGTTGAGGCTCGAAAGCGTG  
GGGAG  
>ASV:2860:Genus:Phascolarctobacterium  
TACGTAGGTGGCGAGCGTTGTCCGGAATTATTGGGCGTAAAGAGCATGTAGGCGCCTATTAAGTCGAGCGTGAAAATGC  
GGGGCTCAACCCGATGGCGCTGAAACTGGTAGGCTTGTAGTGCAGGAGAGAAAGGGGAATCCAGTGTAGCGGTGA  
AATGCGTAGATATTGGGAGGAACACCAGTGGCGAAGGCGCCTTCTGGACTGTGTCTGACGCTGAGATGCGAAAAGCCAGG  
GTAGC  
>ASV:2861:Genus:Lachnospiraceae\_NK4A136\_group  
TACGTAGGGGCAAGCGTTATCCGGATTTACTGGGTGTAAAGGGAGCGTAGACGGCAAGGCAAGTCTGAAGTAAAAGCC  
GGTGCTTAACCCGGGACTGCTTTGAAACTGTTTACTGGAGTGCCGGAGAGGTAAGCGGAATTCCTAGTGTAGCGGTG  
AAATGCGTAGATATTAGGAAGAACACCAGTGGCGAAGGCGGCTTACTGGACGGTAACTGACGTTGAGGCTCGAAAGCGTG  
GGGAG  
>ASV:2862:Family:Microbacteriaceae  
TACGTAGGGGCAAGCGTTGTCCGGAATTATTGGGCGTAAAGAGCTCGTAGGCGGTCTGTCCGCTCTGCTGTGAAATCCC  
GAGGCTCAACCTCGGGCTTGCAGTGGTACCAGGACTAGAGTGGGAGAGGTAAGCGGAATTCCTAGTGTAGCGGTG  
GAATGCGCAGATATCAGGAGGAACACCAGTGGCGAAGGCAAGTCTCTGGGCCGTAAGTACGCTGAGGAGCGAAAAGCGTG  
GGGAG  
>ASV:2863:Genus:Parvimonas  
TACGTATGGGCGAGCGTTGTCCGGAATTATTGGGCGTAAAGGGTACGTAGGCGCCTTTTAAAGTCAGGTGTGAAAAGCGT  
GAGGCTTAACCTCATTAAAGCACTTGAAGTGAAGACTTGTAGTGAAGGAGAGGAAAGTGAATTCCTAGTGTAGCGGTGA  
AATGCGTAGATATTAGGAGGAATACCAGTGGCGAAGGCGACTTCTGGACTTTTACTGACGCTCAGGTACGAAAAGCGTG  
GGAGC  
>ASV:2864:Family:Lachnospiraceae  
TACGTATGGTGAAGCGTTATCCGGATTTACTGGGTGTAAAGGGAGCGTAGACGGTCTGGCAAGTCTGATGTGAAAACCC  
GGGGCTCAACCCGGGACTGCATTGAAACTGTTAGACTAGAGTGTCCGGAGAGGTAAGTGAATTCCTAGTGTAGCGGTG  
AAATGCGTAGATATTAGGAGGAACACCAGTGGCGAAGGCGGCTTACTGGACGATGACTGACGTTGAGGCTCGAAAGCGTG  
GGGAG  
>ASV:2865:Family:Lachnospiraceae  
TACGTAGGGAGCAAGCGTTGTCCGGAATTACTGGGTGTAAAGGGAGCGTAGACGGTTTTGCAAGTCTGAAGTAAAAGCCC  
GGGGCTTAACCCGGGACTGCTTTGAAACTGTAGAAGTGTAGAGTGCAGGAGAGGTAAGTGAATTCCTAGTGTAGCGGTG  
AAATGCGTAGATATTAGGAGGAACACCAGTGGCGAAGGCGGCTTACTGGCACCAACTGACGCTGAGGCTCGAAAGTGTG  
GGTAG  
>ASV:2866:Species:aquatica/cryoconiti/hydrogenivorans/jejuensis  
TACGTAGGGTGCAGCGTTAATCCGGAATTACTGGGCGTAAAGCGTGCAGGCGGTTATGTAAGACAGTTGTGAAATCCC  
CGGGCTCAACCTGGGAATTGCATCTGTGACTGCATAGCTAGAGTACGGTAGAGGGGGATGGAATTCGCGTGTAGCAGTG  
AAATGCGTAGATATGCGGAGGAACACCAGTGGCGAAGGCAATCCCCTGGACCTGACTGACGCTCATGCACGAAAAGCGTG  
GGGAG  
>ASV:2867:Family:Burkholderiaceae  
TACGTAGGGTGAAGCGTTAATCCGGAATTACTGGGCGTAAAGCGTGCAGGCGGTTATGTAAGACAGAGGTGAAATCCC  
CGGGCTCAACCTGGGAACTGCCTTTGTGACTGCATGGCTAGAGTACGGTAGAGGGGGATGGAATTCGCGTGTAGCAGTG  
AAATGCGTAGATATGCGGAGGAACACCAGTGGCGAAGGCAATCCCCTGGACCTGACTGACGCTCATGCACGAAAAGCGTG  
GGGAG  
>ASV:2868:Order:Chloroplast  
GACAGAGGATGCAAGCGTTATCCGGAATGATTGGGCGTAAAGCGTCTGTAGGTGGCTTTTAAAGTCCGCCGTCAAATCCC  
AGGGCTCAACCTGGACAGGCGGTGAAACTACCAAGCTGGAGTACGGTAGGGGAGAGGGAATTCGCGTGGAGCGGTG  
AAATGCGTAGAGATCGGAAAGAACACCAACGGCGAAAGCACTCTGCTGGGCCGACACTGACACTGAGAGACGAAAAGCTAG  
GGGAG  
>ASV:2869:Genus:Parabacteroides  
TACGGAGGATGCGAGCGTTATCCGGATTTATTGGGTTAAAGGGTGCCTAGGTGGTTGTTTAAAGTCAGCGGTGAAAAGTTT  
GTGGCTCAACCATAAAATTGCCGTTGAAACTGGATGACTTGTAGTATATTTGAGGTAGGCGGAATGCGTGGTGTAGCGGTG  
AAATGCATAGATATCACGAGAAGTCCGATTGCGAAGGCAGCTTACTAAACTATAACTGACACTGAAGCACGAAAAGCGTG  
GGGAT  
>ASV:2870:Family:Lachnospiraceae  
TACGTATGGTGAAGCGTTATCCGGATTTACTGGGTGTAAAGGGGCGCAGGCGGTGCGGCAAGTCTGATGTGAAAAGCCC  
GGGGCTCAACCCGGTACTGCATTGAAACTGTCGTAAGTGTAGAGTGTCCGGAGGGTAAGCGGAATTCCTAGTGTAGCGGTG  
GAATGCGTAGATATCACGAAGAAGTCCGATTGCGAAGGCAGCTGCTAAGCTGCAACTGACATTGAGGCTCGAAAGTGTG  
GGTAT  
>ASV:2871:Genus:Subdoligranulum  
AACGTAGGGTGAAGCGTTGTCCGGAATTACTGGGTGTAAAGGGAGCGCAGGCGGACCGGCAAGTTGGAAGTAAAAGTAA  
TGGGCTCAACCCATAAATTGCTTTCAAAGTGTCTTCTTGTAGTGTGAGAGGTAGGCGGAATTCGCGTGTAGCGGTG  
GAATGCTTAGATATCACGAAGAAGTCCGATTGCGAAGGCAGCTCACTGGAGTGTAACTGACGCTGATGCTCGAAAAGTGTG  
GGTAT  
>ASV:2872:Family:Lachnospiraceae  
TACGTAGGGAGCGAGCGTTGTCCGGAATTACTGGGTGTAAAGGGTGCCTAGGTGGTATGGCAAGTCAAGAAGTAAAAGCCC  
AGGGCTTAACCTGAGGACTGCTTTTGAAGTGTGACTGGAGTGCAGGAGAGGTAAGCGGAATTCCTAGTGTAGCGGTG  
AAATGCTTAGATATCACGAAGAAGTCCGATTGCGAAGGCAGCTGCTGGACTGTAACTGACGCTGATGCTCGAAAAGTGTG  
GGTAG  
>ASV:2873:Genus:Ruminococcaceae\_UCG-011

TACGTAGGTGGCAAGCGTTGTCCGGAATTACTGGGTGTAAGGGTGCCTAGGCGGCTTCTAAAGTCAGATGTGAAATACC  
GCAGCTCAACTGCGGGGCTGCATTTGAAACTTGGGAGCTTAGTGAAGTAGAGGTAAGCGGAATTCCTAGTGTAGCGGTG  
GAATGCGTAGATATTAGGAGGAACACCAGTGGCGAAGGCGGCTTACTGGCTTTAACTGACGCTGAGTCACGAAAGCGTG  
GGGAG  
>ASV:2874:Genus:Lachnospiraceae\_NK4A136\_group  
TACGTAGGGGGCAAGCGTTATCCGGATTTACTGGGTGTAAGGGAGCGTAGACGGCATGGCAAGTCTGAAGTGAATGCC  
AGGGCTTAACCTGGAAGTGTCTTGGAACTGTCTAGCTAGAGTGCAGGAGAGGTAAGTGAATTCCTAGTGTAGCGGTG  
AAATGCGTAGATATTAGGAGGAACACCAGTGGCGAAGGCGGCTTACTGGACTGTAACGACGTTGAGGCTCGAAGGCGTG  
GGGAG  
>ASV:2875:Family:Lachnospiraceae  
TACGTAGGTGGCAAGCGTTATCCGGATTTACTGGGTGTAAGGGAGCGTAGACGGTGTGGCAAGTCTGATGTGAAAGGCA  
TGGGCTCAACCTGTGGACTGCATTGGAAGTGTCTACTTGGAGTGCAGGAGGGGTAAGCGGAATTCGTGGTGTAGCGGTG  
AAATGCTTAGATATCACGAAGAACCCTGATTGCGAAGGCGAGTCACTAGACTGTCACTGACACTGATGCTCGAAAGTGTG  
GGTAT  
>ASV:2876:Family:vadinBE97  
TACGTAGGTGCAAGCGTTGTCCGGATTCATTGGGCGTAAAGGGTCCGACAGGTGGTTTGATAAGTCTGACGTGAAATACC  
GGAGCTCAACTCCGGAAGTGCCTTGGAGACTGTTGAACTGGAGTATCGGAGAGGAAATTGGAATTCAGGTGTAGCGGTG  
GAATGCGTAGATATCTGGAAGAACCACAGTGGCGAAGGCGGCTTCTGGACGATAACTGACACTCAGGGACGAAAGCATG  
GGGAG  
>ASV:2877:Genus:Alistipes  
TACGGAGGATCAAGCGTTATCCGGATTTATTGGGTTAAAGGGTGCCTAGGCGGTTTGATAAGTTAGAGGTGAAATCCC  
GGGCTTAACCTCCGCACTGCCTCTGATACTTGGACTAGAGAGTAGTTGCCGTAGCGGGAATGTATGGTGTAGCGGTG  
AAATGCTTAGAGATCATACGAAGAACCCGATTGCGAAGGCGAGTTACCAAATATATCTGACGTTGAGGCACGAAAGCGTG  
GGGAG  
>ASV:2878:Genus:Lachnospiraceae\_NK4A136\_group  
TACGTAGGGGGCAAGCGTTATCCGGATTTACTGGGTGTAAGGGAGCGTAGACGGCAGCGCAAGTCTGAAGTGAATGCC  
GGGCTTAACCCGGAAGTGCCTTGGAACTGTGCAGCTAGAGTGCAGGAGAGGTAAGTGAATTCCTAGTGTAGCGGTG  
AAATGCGTAGATATTAGGAGGAACACCAGTGGCGAAGGCGGCTTACTGGACTGTAACGACGTTGAGGCTCGAAAGCGTG  
GGGAG  
>ASV:2879:Family:Ruminococcaceae  
TACGTAGGGAGCGAGCGTTGTCCGGAATTACTGGGTGTAAGGGAGCGTAGGCGGGAGCGCAAGTTAAATGTTTAAACTA  
TCGGCTCAACTGATAGTCGCGTTTAAACTGCGTTTCTTGGTGAAGTAGAGGAGGCGGAATTCCTAGTGTAGCGGTG  
AAATGCGTAGATATTAGGAGGAACACCAGTGGCGAAGGCGGCTGCTGGGCTTTAACTGACGCTGAGGCTCGAAAGCGTG  
GGAGC  
>ASV:2880:Genus:Ruminiclostridium\_5  
TACGTAGGGGGCAAGCGTTATCCGGATTTACTGGGTGTAAGGGTGCCTAGGCGGTTTGGAAGTCAAGTGAATCCA  
TGGGCTTAACCCGTAAGTGCATCGGAACTGATGACTTGGAGTGAAGTAGAGGAGGAGGCGGAATTCCTAGTGTAGCGGTG  
AAATGCGTAGATATTAGGAGGAACACCAGTGGCGAAGGCGGCTTACTGGACGTAAGTACGCTGAGGCTCGAAAGCGTG  
GGGAG  
>ASV:2881:Species:beninensis/fabalis/fabaria/ghanensis  
TACGTATGTCCCAAGCGTTATCCGGATTTATTGGGCGTAAAGCGAGCGCAGGCGGTTATTTAAGTCTGATGTGAAAGCCT  
ACGGCTCAACCGTAGAATTGCATCGGAACTGGATGACTTGGAGTGCAGTGCAGTGCAGGAGGAGGCGGAATTCCTAGTGTAGCGGTG  
AAATGCGTAGATATTAGGAGGAACACCAGAGGCGAAGGCGGCTCTCTGGACTGTAAGTACGCTGAGGCTCGAAAGCGTG  
GGTAG  
>ASV:2882:Genus:Pseudoflavonifractor  
TACGGAGGATGCGAGCGTTATCCGGATTTATTGGGTTAAAGGGAGCGTAGATGGATGTTAAGTCAAGTGTGAAAGTTT  
GCGGCTCAACCGTAAATGCACTTGGATACTGGATATCTTGGAGTGCAGTTGAGGCAATCGGAATTCCTGTTAGCGGTG  
AAATGCGTAGATATTAGGAGGAACACCAGTGGCGAAGGCGGATTGCTGGACAGTAACTGACGCTGAGGCGGAAAGCGTG  
GGTAG  
>ASV:2883:Genus:Ruminococcaceae\_UCG-014  
TACGTAGGGAGCAAGCGTTATCCGGATTTATTGGGTGTAAGGGTGCCTAGACGGGAAATTAAGTTAGTTGTGAAATCCC  
TCGGCTCAACTGAGGAAGTGCCTTAACTGATTTTCTTGGACTGAGAGGAAAGTGAATTCCTAGTGTAGCGGTG  
AAATGCGTAGATATTAGGAGGAACACCAGTGGCGAAGGCGACTTCTGGACAGAACTGACGTTGAGGCACGAAAGCGTG  
GGGAG  
>ASV:2884:Family:Lachnospiraceae  
TACGTATGGTCAAGCGTTATCCGGATTTACTGGGTGTAAGGGAGCGCAGGCGGTGCGGCAAGTCTGATGTGAAAGCCC  
GGGGCTCAACCCGCTACTGCTTGGAACTGCAGACTTGGAGTGAAGTAGAGGAGGCGGAAATTCCTGTTAGCGGTG  
AAATGCGTAGAGATGGGAGGAACACCAGTGGCGAAGGCGGCTGCTGGGCTTTAACTGACGCTGAGGCTCGAAAGCGTG  
GGGAG  
>ASV:2885:Genus:Alistipes  
TACGGAGGATCAAGCGTTATCCGGATTTATTGGGTTAAAGGGTGCCTAGGCGGTTTGATAAGTTAGAGGTGAAATACC  
GGGGCTCAACTCCGGAAGTGCCTTAATACTGTTGAACTAGAGAGTAGTTGCCGTAGGCGGAATGTATGGTGTAGCGGTG  
AAATGCGTAGATATTAGGAGGAACATCAGTGGCGAAGGCGGCTTACTGGACTGAAACTGACACTGAGGCACGAAAGCGTG  
GGGAG  
>ASV:2886:Species:carnea  
TACGTAGGGTGCAGCGTTGTCCGGAATTACTGGGCGTAAAGAGCTTGTAGGCGGCTTGTCCGCTCGATCGTGAAGTCC  
GGGGCTCAACCCGAGCTTGCCTGATACGGGAGGCTTGGAGTACTCAGGGGAGACTGGAATTCCTGGTGTAGCGGTG  
AAATGCGTAGATATTAGGAGGAACACCAGTGGCGAAGGCGGCTTCTGGGAAGTAACTGACGCTGAGAAAGCGAAAGCATG

GGTAG  
>ASV:2887:Family:Lachnospiraceae  
TACGGAGGATCCGAGCGTTATCCGGATTTACTGGGTGTAAGGGAGCGCAGGCGGTGCGGCAAGTCTGATGTGAAAAGCC  
GGGGCTCAACCCCGTACTGCATTGAAACTGTCGTAAGTGTAGAGTGTGCGAGGGTAAGCGGAATTCCTAGTGTAGCGGTG  
AAATGCGTAGATATCACGAAGAACTCCGATTGCGAAGGCAGCTGCTAAGCTGCAACTGACATTGAGGCTCGAAAGTGTG  
GGTAT  
>ASV:2888:Family:Ruminococcaceae  
TACGTAGGGAGCGAGCGTTGTCCGGAATTACTGGGTGTAAGGGTGCCTAGGCGGATGCGCAAGTCAAGTGTGAAATGCA  
TGGGCTTAACCCATGACGTGCTATTGAAACTGTGTATCTTGAAGTGAAGTAGAGGCAGGCGGAATTCCTAGTGTAGCGGTG  
AAATGCGTAGAGATCGGGAGGAACACCAGTGGCGAAGGCGGCTGCTGGGCTTTAACTGACGCTGAGGCACGAAAGTGTG  
GGTAG  
>ASV:2889:Genus:Bacteroides  
TACGTAGGTGGCAAGCGTTGTCCGGAATTACTGGGTGTAAGGGAGCGTAGGCGGATTATTAAGTCAAGTGTGAAAAGTTT  
GCGGCTCAACCGTAAAATTGCAAGTGTACTGGTAGTCTTGAAGTGCAGTAGAGGTGGGCGGAATTCCTAGTGTAGCGGTG  
AAATGCTTAGATATCACGAAGAACTCCGATTGCGAAGGCAGCTCACTGGAGTGAACGACGCTGATGCTCGAAAGTGTG  
GGTAT  
>ASV:2890:Genus:Ruminococcaceae\_UCG-005  
TACGTAGGTGGCAAGCGTTGTCCGGAATTACTGGGTGTAAGGGAGCGTAGGCGGAGTCAAGTCAAGTGTGAAATCCC  
TGGGCTCAACCCAGGAACTGCATTTGAAACTGTAGCCCTTGAAGTATCGGAGAGGCAGGCGGAATTCCTAGTGTAGCGGTG  
AAATGCGTAGATATTAGGAGGAACACCAGTGGCGAAGGCGGCTGCTGGACGACAACGACGCTGAGGCGCGAAAGCGTG  
GGGAG  
>ASV:2891:Species:aminoaromatica/humireducens/mechernichensis  
TACGTAGGGTGCAGCGTTAATCCGGAATTACTGGGCGTAAAGCGTGCAGGCGGTTTTGTAAGACAGATGTGAAATCCC  
CGGGCTTAACCTGGGAACTGCGTTTGTACTGCAAGGCTAGAGTACGGCAGAGGGGGTGGAAATTCCTAGTGTAGCAGTG  
AAATGCGTAGATATCAGGAGGAACACCAGTGGCGAAGGCAGCCCCCTGGGCTGTACTGACGCTCATGCACGAAAGCGTG  
GGGAG  
>ASV:2892:Genus:Lachnospiraceae\_NK4A136\_group  
TACGTAGGGGGCAAGCGTTATCCGGATTTACTGGGTGTAAGGGAGCGTAGACGGCAAGGCAAGTCTGAAGTAAAAGCCC  
GGTGCTTAACCCGGGACTGCTTTGAAACTGTTTAGCTGGAGTGCAGGAGAGGTAGGCGGAATTCCTAGTGTAGCGGTG  
AAATGCGTAGATATTAGGAGGAACACCAGTGGCGAAGGCGGCTTACTGGACGTAACGACGTTGAGGCTCGAAAGCGTG  
GGGAG  
>ASV:2893:Genus:Lachnospiraceae\_FCS020\_group  
TACGTAGGGGGCAAGCGTTATCCGGATTTACTGGGTGTAAGGGAGCGCAGGTGGCAAGGCAAGCCAGAAGTAAAACCC  
GGGGCTTAACCCCGGATTGCTTTTGAAGTGTCTGGCTAGAGTGCAGGAGGGGCGAGGCGGAATTCCTAGTGTAGCGGTG  
GAAATGCGTAGATATTAGGAGGAACACCAGTGGCGAAGGCGGCTGCTGGACTGTAACGACTGAGGCTCGAAAGCGTG  
GGGA  
>ASV:2894:Genus:Lachnoclostridium  
TACGTAGGGGGCAAGCGTTATCCGGATTTACTGGGTGTAAGGGAGCGTAGACGGCGATGCAAGTCTGAAGTAAAACCC  
AGGGCTCAACCTGGGACTGCTTTGAAACTGTGTTGCTAGAGTGTGGAGAGGTAAGTGAATTCCTAGTGTAGCGGTG  
AAATGCGTAGATATTAGGAGGAACACCAGTGGCGAAGGCGGCTTACTGGACAGTAACGACGTTGAGGCTCGAAAGCGTG  
GGGAG  
>ASV:2895:Genus:Ruminococcaceae\_UCG-003  
TACGTAGGTGGCAAGCGTTGTCCGGAATTACTGGGTGTAAGGGAGCGTAGGCGGGCATGCAAGTCAAGTGTGAAATCCA  
TGGGCTTAACCCATGAACTGCATTTGAAACTGTATGTCTTGAAGTGCAGGAGAGGTAATCGGAATTCCTGTGTAGCGGTG  
AAATGCGTAGATATAAGGAGGAACACCAGTGGCGAAGGCGGATTACTGGACGTAACGACGTTGAGGCGCGAAAGCGTG  
GGGAG  
>ASV:2896:Family:Lachnospiraceae  
TACGTAGGGGGCAAGCGTTATCCGGATTTACTGGGTGTAAGGGAGCGTAGACGGTCAAGCAAGTCAAGTGTGAAAGGCT  
GGGGCTCAACCCCGGACTGCTTTTGAAGTGTGTTGACTGGAGTGTGGAGAGGTAAGCGGAATTCCTAGTGTAGCGGTG  
AAATGCGTAGATATTAGGAGGAACACCAGCGGCGAAGGCGGCTTACTGGACAGTAACGACGTTGAGGCTCGAAAGCGTG  
GGGAG  
>ASV:2897:Genus:Bacteroides  
TACGGAGGATCCGAGCGTTATCCGGATTTATTGGGTTAAAGGGAGCGTAGGTGGATTGTTAAGTCAAGTGTGAAAAGTTT  
GCGGCTGACCGTAAAATTGCAAGTGTACTGGATATCTTGAAGTGCAGTTGAGGCAGGCGGAATTCCTAGTGTAGCGGTG  
AAATGCGTAGAGATGGGGAGGAACACCAGTGGCGAAGGCGGCTGCTGGGCTTTAACTGACGCTGAGGCACGAAAGCGTG  
GGTAG  
>ASV:2898:Family:Coriobacteriales\_Incertae\_Sedis  
TACGTAGGGAGCAAGCGTTATCCGGATTTATTGGGCGTAAAGCGCGTAGGCGGCTTGTAAAGCAAGATCTCAAATCTG  
GGGGCTCAACCTCCAGCCGGATTTTGAAGTGGCAGGCTCAGTGTGAGAGGAAAGTGGAAATTCCTAGTGTAGCGGTG  
AATGCGCAGATATTGGGAGGAACACCAGTGGCGAAGGCGAGCTTTCTGGGCCATAACTGACGCTGAGGTGCGAAAGCTAGG  
GGAGC  
>ASV:2899:Genus:Anaerostipes  
TACGTAGGGGGCAAGCGTTATCCGGAATTACTGGGTGTAAGGGTGCCTAGGTGGTATGGCAAGTCAAGTGTGAAAACCC  
GGGGCTTAACCTCCGGACTGCTTTTGAAGTGTCAAAGTGCAGGAGAGGTAAGCGGAATTCCTAGTGTAGCGGTG  
AAATGCGTAGATATTAGGAGGAACATCAGTGGCGAAGGCGGCTTACTGGACTGAAACTGACACTGAGGCACGAAAGCGTG  
GGGAG  
>ASV:2900:Genus:Gemella  
TACGTAGGTGGCAAGCGTTGTCCGGAATTATTGGGCGTAAAGCGCGCAGGTGGTTAATAAGTCTGATGTGAAAAGCCC

ACGGCTCAACCGTGGAGGGTCATTGAAACTGTTGAACTTGAAGTGCAGGAGAGAAAAGTGAATTCCTAGTGTAGCGGTG  
AAATGCGTAGAGATTAGGAGGAACACCAGTGGCGAAGGCGGCTTTTTGGCCTGTAACGACTGAGGCGCAAAGCGTG  
GGGAG

>ASV:2901:Order:Bacteroidales

TACGGAAGATGCGAGCGTTATCCGGATTTATTGGGTTAAAGGGTGCAGGCGGTTAGTAAGTCAGCGGTGAAATTTT  
GGTGCTTAACACCAACCGTGCCTGATACTGCTGGCTAGAGAGTAGTTGCGGTAGCGGGAATGTATGGTGTAGCGGTG  
AAATGCTTAGATATCACGAAGAAGTCCGATTGCGAAGGCAGCTTACTGGATTGTAACGACGCTGATGCTCGAAAGTGTG  
GGTAT

>ASV:2902:Order:Clostridiales

TACGTAGGTGGCAAGCGTTGTCCGGATTTACTGGGTGTAAGGGCGTGCAGGCGGAGAAGCAAGTCAGAAGTAAATCCA  
TGGGCTTAACCATGAACTGCTTTTGAAGTGTTCCTTGGATATCGGAGAGGCAGGCGGAATTCCTAGTGTAGCGGTG  
AAATGCTTAGATATCACGAAGAAGTCCGATTGCGAAGGCAGCTACTAGACTGTCACTGACACTGATGCTCGAAAGTGGC  
GGTAT

>ASV:2903:Family:Peptococcaceae

TACGTAGGGAGCAAGCGTTGTCCGGAATTACTGGGCGTAAAGGGCGGCTAGGCGGATGTTAAAGTCAGGTGTGAAAAC  
AGGGCTCAACCTTTAGACTGCCTTGAAGTGTATCTTGGAGGCGAGGAGGAAAGTGAATTCCTAGTGTAGCGGTG  
AAATGCGTAGATATTAGGAGGAACACCAGTGGCGAAGGCGACTTTCTGGACTGTACCTGACGCTGAGGCGCAAAGCATG  
GGGAG

>ASV:2904:Family:Ruminococcaceae

TACGTAGGTGGCAAGCGTTGTCCGGATTTACTGGGTGTAAGGGAGCGCAGGCGGGACAGCAAGTTGGATGTGAAATACC  
GGAGCTTAACCTCCGAGCTGCATCCAAAAGTGTGTTCTTGGAGTGAAGTAGAGGTTGGCGGAATTCAGTGTAGCGGTG  
AAATGCGTAGATATTAGGAGGAACACCAGTGGCGAAGGCGGCAACTGGGCTTTAACTGACGCTGAGGCTCGAAAGCATG  
GGGAG

>ASV:2905:Genus:Bacteroides

TACGGAGGATCCGAGCGTTATCCGGATTTATTGGGTTAAAGGGAGCGTAGGTGGACAGTTAAGTCAGTTGTGAAAATTT  
GCGGCTCAACCGTAAAATTGCAAGTGTACTGGCAGTCTTGGATACAGTAGAGGTGGGCGGAATTCGTGGTGTAGCGGTG  
AAATGCTTAGATATCACGAAGAAGTCCGATTGCGAAGGCAGCTACTAGACTGGTCACTGACACTGAGGCTCGAAAGTGTG  
GGGTA

>ASV:2906:Genus:Prevotella

TACGGAAGGTTCCGGCGTTATCCGGATTTATTGGGTTAAAGGGAGCGTAGGCGGTTTGGTAAGCGTGTGTGAAATGTA  
GGAGCTCAACTTCTAGATTGCAAGCGCAACTGTGCACTTGGTGCACACAGTAGGCGGAATTCATGGTGTAGCGGTG  
AAATGCTTAGATATCATGAAGAAGTCCGACTGCGAAGGCAGCTTACGGGAGCGCAACTGACGCTGAAGCTCGAAGGTGGC  
GGTAT

>ASV:2907:Family:Ruminococcaceae

TACGTAGGGAGCGAGCGTTGTCCGGAATTACTGGGTGTAAGGGTGCAGGCGGCGAGTCAAGTCAGGCGGTGAAATCTA  
TGGGCTTAACCATAGTCTGCGTTTGAAGTGTGTTTGGAGTGAAGTAGAGGTAAGCGGAATTCGCGGTGTAGCGGTG  
AAATGCGTAGAGATCCGGAGGAACACCAGTGGCGAAGGCGGCTTACTGGGCTTTACTGACGCTGAGGCACGAAAGCATG  
GGTAG

>ASV:2908:Species:halotolerans/nanhaiensis

TACGTAGGGTCCGAGCGTTGTCCGGAATTTATTGGGCGTAAAGAGCTCGTAGGTGGTGTGTCGCGTCTGCTGTGCAAGTCC  
GGGGCTTAACCTCCGTTTTGCAAGTGGATACGGGATGCTAGAGGTAGGTAGGGGAGACTGGAATTCCTGGTGTAGCGGTG  
AAATGCGCAGATATCAGGAGGAACACCAGTGGCGAAGGCGGCTCTCTGGGCTTACCTGACGCTGAGGAGCGAAAGCGTG  
GGGAG

>ASV:2909:Genus:Parabacteroides

TACGGAGGATCCGAGCGTTATCCGGATTTATTGGGTTAAAGGGTGCAGGCGGCTTTTAAAGTCAGGCGGTGAAAGTCT  
GTGGCTCAACCATAGAATTGCCGTTGAAACTGGGAGGCTTGGATGTTTGGAGCAGGCGGAATGCGTGGTGTAGCGGTG  
AAATGCGTAGATATTAGGAGGAACACCAGTGGCGAAGGCGGCTTACTGGACGTTAAGTGAAGTGTGAGGCTCGAAAGCGTG  
GGGAG

>ASV:2910:Family:Lachnospiraceae

TACGTATGGTCAAGCGTTATCCGGATTTACTGGGTGTAAGGGTGCAGGCGGAGTCTGAAAGTGAATCC  
GGGGCTCAACCCGGAAGTGTGTTGAAACTGTTTGGAGTACAGGAGAGGTAAGTGAATTCGCGGTGTAGCAGTG  
AAATGCGTAGATATCAGAGGAACACTCGTGGCGAAGGCGGTTCTTGGACATTAACGACGCTGAGGCACGAAAGCCAG  
GGGAG

>ASV:2911:Family:Ruminococcaceae

TACGGAGGTGGCAAGCGTTGTCCGGATTTACTGGGTGTAAGGGCGTGTAGCCGGGAAGGCAAGTCAGATGTGAAATCCA  
CGGGCTTAACCTCGTGAAGTGCATTTGAAACTGTTTTCTTGGATATCGGAGAGGCAATCGGAATTCCTAGTGTAGCGGTG  
AAATGCGTAGATATTACGAAGAAGTCCGATTGCGAAGGCAGCTTACTGGACTGTAACGACGCTGATGCTCGAAAGTGTG  
GGTAT

>ASV:2912:Order:Clostridiales

TACGTAGGGAGCGAGCGTTGTCCGGAATTACTGGGTGTAAGGGAGCGTAGGCGGGATAGCAAGTCAGATGTGAAAAC  
TGGGCTCAACCTGTAGATTGCATTTGAAACTGTTGTTCTTGGAGTGAAGTAGGGTAAGCGGAATTCGTGGTGTAGCGGTG  
AAATGCTTAGATATCACGAAGAAGTCCGATTGCGAAGGCAGCTTACTGGACTGTAACGACGCTGATGCTCGAAAGTGTG  
GGTAT

>ASV:2913:Family:Lachnospiraceae

TACGTAGGGGGCAAGCGTTATCCGGAATTACTGGGTGTAAGGGTGCAGGCGGATGGCAAGTCAGAAGTGAAGAACCC  
AGGGCTTAACCTGGGACTGCTTTTGAAGTGTGCAAGTGCAGACTGGAGTGCAGGAGAGGTAAGCGGAATTCGTGGTGTAGCGGTG  
AAATGCTTAGATATCACGAAGAAGTCCGATTGCGAAGGTAGCTTACTGGATTGTAACGACGCTGATGCTCGAAAGTGTG  
GGTAT

>ASV:2914:Family:Ruminococcaceae  
TACGTAGGTGGCAAGCGTTATCCGGATTTACTGGGTGTAAAGGGCGTGCAGCCGGGAATGCAAGTCAGATGTGAAATCCA  
TGGGCTTAACCATGAAGTGCATTTGAAACTGTATTTCTTGAGTACTGGAGAGGCAATCGGAATTCCTAGTGTAGCGGTG  
AAATGCTTAGATATACGAAGAAGTCCGATTGCGAAGGCAGCTCACTGGACTGCAACTGACACTGATGCTCGAAAGGTG  
GGTAT

>ASV:2915:Genus:Parabacteroides  
TACGGAGGATCCGAGCGTTATCCGGATTTATTGGGTTAAAGGGTGCCTAGGCGGCCTCTTAAGTCAGCGGTGAAAGTCT  
GTGGCTCAACCTAGAAATTGCCGTTGAAACTGGGGGCTTGGATGTTTGGAGCAGGCGGAATGCGTGGTGTAGCGGTG  
AAATGCTTAGATATTAGGAGGAACACCAGTGGCGAAGGCGGCTTACTGGACGATAACTGACGTTGAGGCTCGAAAGCGTG  
GGGAG

>ASV:2916:Genus:Anoxybacillus  
TACGTAGGTGGCAAGCGTTGTCCGGATTTATTGGGCGTAAAGCGCGCAGGCGGCTCTTAAGTCTGATGTGAAAGCCC  
ACGGCTCAACCTAGAAATTGCCGTTGAAACTGGGGGCTTGGATGTTTGGAGCAGGCGGAATGCGTGGTGTAGCGGTG  
AAATGCTTAGATATTAGGAGGAACACCAGTGGCGAAGGCGGCTTACTGGACGATAACTGACGTTGAGGCTCGAAAGCGTG  
GGGAG

>ASV:2917:Species:nucleatum  
TACGTATGTCACGAGCGTTATCCGGATTTATTGGGCGTAAAGCGCGTCTAGGTGGTTATATAAGTCTGATGTGAAATGC  
AGGGCTCAACTCTGTATTGCGTTGAAACTGTATAACTAGAGTACTGGAGAGGTAAGCAGGAACTACAAGTGTAGAGGTGA  
AATTCGTAGATATTTGTAGGAATGCCGATGGGGAAGCCAGCTTACTGGACAGATACTGACGCTAAAGCGCGAAAGCGTG  
GTAGC

>ASV:2918:Genus:Fastidiosipila  
TACGTAGGTGGCAAGCGTTATCCGGATTTACTGGGTGTAAAGGGCGTGTAGGCGGATTCTCAAGTTGGATGTGAAACCCC  
TTGGCTAAACTGAGGGCTTGCAATTCAAAAGTGGAGCCTTGGATGTTTGGAGGGAAGTGGAAATTCCTGGTGGAGCGGTA  
AAATGCTTAGATATTAGGAGGAACACCAGTGGCGAAGGCGACTTTCTGGCTGATAACTGACGCTGAGGCGCGAAAGCGTG  
GGGAG

>ASV:2919:Genus:Parabacteroides  
TACGGAGGATCCGAGCGTTATCCGGATTTATTGGGTTAAAGGGTGCCTAGGTGGTATTAAAGTCAGCGGTGAAAGTCT  
GTGGCTCAACCTAGAAATTGCCGTTGAAACTGGGTTACTTGGATGTTTGGAGTAGGCGGAATGCGTGGTGTAGCGGTG  
AAATGCTAGATATCCGGAGGAACACCAGTGGCGAAGGCGGCTTACTGGACCAACTGACGCTGAGGCTCGAAGGCCAG  
GGGAG

>ASV:2920:Genus:Ruminococcaceae\_UCG-014  
TACGTAGGGAGCAAGCGTTATCCGGATTTATTGGGTGTAAAGGGTGCCTAGACGGGAGATTAAGTTAGTTGTGAAAGCCC  
TCGGCTTAACCTAGGGAATTGCAACTAAAAGTGGTTTTCTTGAGTGCAGGAGAGGTAAGTAGAATTCCTAGTGTAGCGGTG  
AAATGCTTAGATATTAGGAGGAACACCAGTGGCGAAGGCGACTTACTGGACTGTGACTGACGTTGAGGCGCGAAAGGTG  
GGGAG

>ASV:2921:Species:allosaccharophila/aquatica/aquatilis/australiensis/bestiarum/bivalvium/  
cavernicola/caviae/crassostreae/dhakensis/diversa/encheleia/enterica/enteropelogenes/  
eucrenophila/finlandiensis/hydrophila/intestinalis/jandaei/lacus/media/molluscorum/piscicola/  
popoffii/rivipollensis/rivuli/salmonicida/sanarellii/sobria/taiwanensis/tecta/veronii  
TACGGAGGGTGCAGCGTTAATCCGGAATTAAGCGCACGCAGGCGGTTGGATAAGTTAGATGTGAAAGCCC  
CGGGCTCAACCTGGGAATTGCATTTAAAAGTGTCCAGCTAGAGTCTTGTAGAGGGGGTGAATTCAGGTGTAGCGGTG  
AAATGCTTAGATATTAGGAGGAATACCAGTGGCGAAGGCGGCCCCCTGGACAAGACTGACGCTCAGGTGCGAAAGCGTG  
GGGAG

>ASV:2922:Genus:Asaccharospora  
TACGGAGGATCCGAGCGTTATCCGGATTTATTGGGTTAAAGGGAGCGTAGGTGGTTTCTTAAGTCAGAGGTGAAAGGCT  
ACGGCTCAACCTAGTAAGCTTTGAAACTGGAGGACTGGAGTGCAGGAGAGGAGAGTGAATTCCTAGTGTAGCGGTGA  
AATGCTTAGATATTAGGAGGAACACCAGTAGCGAAGGCGGCTTCTGGACTGTAAGTACGCTGAGGCGCGAAAGCGTGG  
GGAGC

>ASV:2923:Family:Ruminococcaceae  
TACGTAGGTGGCAAGCGTTGTCCGGATTTACTGGGTGTAAAGGGCGTGCAGCCGGGAATGCAAGTCAGATGTGAAATCCA  
TGGGCTTAACCATGAAGTGCATTTGAAACTGTATTTCTTGAGTACTGAAGAGGCAATCGGAATTCCTAGTGTAGCGGTG  
AAATGCTTAGATATACGAAGAAGTCCGATTGCGAAGGCAGCTCACTGGAGTGAAGTACGCTGATGCTCGAAAGGTG  
GGTAT

>ASV:2924:Family:Lachnospiraceae  
TACGTAGGGGGCAAGCGTTATCCGGATTTACTGGGTGTAAAGGGAGCGTAGACGGCTAAGCAAGTCAGAAGTGAAAGGCT  
GGGGCTCAACCCGGGACTGCTTTTGAAGTGTAGCTAGAGTGTGGAGAGGTAAGCAGGAAATTCCTAGTGTAGCGGTG  
AAATGCTTAGATATTAGGAGGAACACCAGTGGCGAAGGCGGCTTACTGGACAGTAAGTACGCTGAGGCGCGAAAGCGTG  
GGGAG

>ASV:2925:Family:Lachnospiraceae  
TACGTAGGGGGCAAGCGTTATCCGGATTTACTGGGTGTAAAGGGAGCGTAGACGGATGGACAAGTCTGATGTGAAAGGCT  
GGGGCTCAACCCGGGACTGCTTTTGAAGTGTAGCTAGAGTGTGGAGAGGCAAGTGGAAATTCCTAGTGTAGCGGTG  
AAATGCTTAGATATACGAAGAAGTCCGATTGCGAAGGCAGCTTACTGGATTGTAAGTACGCTGATGCTCGAAAGGTG  
GGTAT

>ASV:2926:Family:Lachnospiraceae  
TACGTAGGGGGCAAGCGTTATCCGGATTTACTGGGTGTAAAGGGAGCGTAGACGGAAATGGCAAGTCTGATGTGAAAGGCT  
GGGGCTCAACCCGGGACTGCTTTTGAAGTGTAGCTAGAGTGTGGAGAGGTAAGTGGAAATTCCTAGTGTAGCGGTG  
AAATGCTTAGATATTAGGAGGAACACCAGTGGCGAAGGCGGCTTACTGGACGGTAAGTACGCTGAGGCTCGAAAGCGTG  
GGGAG



>ASV:2927:Order:Bacteroidales  
TACGGAGGATGCGAGCGTTATCCGGATTTATTGGGTTAAAGGGTGCCTAGGTGGTATTAAAGACAGCGGTGAAAAGTTT  
GTGGCTCAACCATAAATTGCCGTTGAAACTGGGTTACTTGTAGTGTGCTTAGGTAGCGGAATGCGTGGTGTAGCGGTG  
AAATGCATAGATATTAGGAGGAACACCAGTGGCGAAGGCGGCTACTGGGCACCAACTGACGCTGAGGCTCGAAAGTGTG  
GGTAG

>ASV:2928:Family:Ruminococcaceae  
TACGGAGGATGCGAGCGTTATCCGGATTTATTGGGTTAAAGGGAGCGTAGGCGGACGCTTAAGTCAGTTGTGAAAAGTTT  
GCGGCTCAACCGTAAATTGCAGTTGATACTGGTGTCTTGTAGTGTGACAGAGGTAGCGGAATCCCGGTGTAGCGGTG  
GAATGCGTAGATATCGGAGGAACACCAGTGGCGAAGGCGGCTACTGGGCACCAACTGACGCTGAGGCTCGAAAGTGTG  
GGTAG

>ASV:2929:Family:Lachnospiraceae  
TACGTATGGTGAAGCGTTATCCGGATTTACTGGGTGTAAGGGTGCCTAGGTGGCAAGCAAGTCAGATGTGAAAAGCCC  
GGGGCTCAACCCGGTACTGCATTTGAAACTGTCTAGCTAGAGTGCAGGAGAGGTAAGCGGAATTCCTAGTGTAGCGGTG  
AAATGCTTAGATATCACGAAGAAGTCCGATTGCGAAGGCAGCTACTGGAGTGAAGTACGCTGATGCTCGAAAGTGTG  
GGTAT

>ASV:2930:Class:Bacteroidia  
TACGGAGGATCCGAGCGTTATCCGGATTTATTGGGTTAAAGGGTGCCTAGGCTGTTTTTAAAGTTAGAGGTGAAAAGCTC  
GACGCTCGACGTGCAAAATTCCTGATACTGAGAGACTAGAGTGTAGTTGCGGAAGGCGGAATTCCTAGTGTAGCGGTG  
AAATGCGTAGATATTAGGAGGAACACCAGTGGCGAAGGCGGCTACTGGGCACCAACTGACGCTGAGGCTCGAAAGTGTG  
GGTAG

>ASV:2931:Order:Bacteroidales  
TACGGAGGATCCGAGCGTTATCCGGATTTATTGGGTTAAAGGGAGCGTAGGCGGGTGTAAAGTCAGTTGTGAAAATCGT  
GCGGCTTAACCGTCAATTGCAATTTGATACTGCGTCTTGTAGTGCACACAGGGATGTTGGAATTCATGGTGTAGCGGTG  
AAATGCGTAGATATAAGGAAGAACACCAGTGGCGAAGGCGGATTACTGGACGTAAGTACGCTGAGGCTCGAAAGCGTG  
GGGAG

>ASV:2932:Phylum:Firmicutes  
TACGTAGGTGGCAGCGTTGTCCGGAATTATTGGGCGTAAAGAGCATGTAGGCGGCTTAATAAGTCGAGCGTGAAAATGC  
GGGGCTTAACCCGTTAGGCGTGGAAACTGTAGGCTTGTAGTGCAGGAGAGGCAAGTGGAAATTCCTAGTGAAGCGGTG  
AATGCGTAGATATTAGGAGGAACACCAGTGGCGAAGGCGGCTGTCTGGTCTGTAAGTACGCTGAGGCTCGAAAGCGTG  
GGAGC

>ASV:2933:Genus:GCA-900066225  
TACGTAGGTGGCAAGCGTTGTCCGGAATTACTGGGTGTAAGGGAGCGTAGGCGGGAAGCAAGTTGAATGTTAAACTA  
TCGGCTCAACCGATAATCGCGTTCAAAACTGTTTTCTTGTAGTGAAGTAGAGGTAGGCGGAATTCCTAGTGTAGCGGTG  
AATGCGTAGATATTAGGAGGAACACCAGTGGCGAAGGCGGCTGTCTGGGCTTAACTGACGCTGAGGCTCGAAAGCGTG  
GTAGC

>ASV:2934:Family:Lachnospiraceae  
TACGTAGGTGGCAGCGTTATCCGGAATTACTGGGTGTAAGGGTGCCTAGGTGGTATGGCAAGTCAGAAGTAAAACCC  
AGGGCTTAACCTGAGGACTGCTTTTGAAGTGTGAGACTGGAGTGCAGGAGAGGTAAGCGGAATTCCTAGTGTAGCGGTG  
AAATGCTTAGATATCACGAAGAAGTCCGATTGCGAAGGCAGCTGCTAAGTGCACCTGACATTGAGGCTCGAAAGTGTG  
GGTAT

>ASV:2935:Family:Ruminococcaceae  
TACGTAGGTGGCAAGCGTTGTCCGGAATTACTGGGTGTAAGGGAGCGTAGGCGGGATGCAAGTCAGATGTGAAAACTA  
TGGGCTCAACCTGTAGATTGCATTTGAAACTGTTGTTCTTGTAGTGAAGTAGAGGTAAGCGGAATTCCTAGTGTAGCGGTG  
AAATGCGTAGATATTAGGAGGAACACCAGTGGCGAAGGCGGATTGCTGGACGACAAGTACGCTGAGGCTCGAAAGCGTG  
GGGAG

>ASV:2936:Genus:Tyzzerella  
TACGTAGGGGGCAAGCGTTATCCGGAATTACTGGGTGTAAGGGAGCGTAGGCGGCATGGTAAGCCAGATGTGAAAAGCCT  
TAGGCTTAACCTGAGGATTGCATTTGAAACTATCAAGCTAGAGTACAGGAGAGGAAAGCGGAATTCCTAGTGTAGCGGTG  
AAATGCGTAGATATTAGGAAGAACACCAGTGGCGAAGGCGGCTTCTGGACTGAAACTGACGCTGAGGCTCGAAAGCGTG  
GGGAG

>ASV:2937:Species:vaginalis  
TACGTAGGGCGCAAGCGTTATCCGGAATTATTGGGCGTAAAGAGCTTGTAGGCGGTTCTGTCGCTGTTGGTGTGAAAAGCCC  
ATCGCTTAACCGTGGTCTGCGCCGGGTACGGGCGGCTAGAGTGCAGTAGGGGAGACTGGAATTCCTAGTGTAGCGGTG  
GAATGCTTAGATATCGGGAAGAACACCAGTGGCGAAGGCGGCTCTCTGGGCTGTTACTGACGCTGAGAAGCGAAAGCGTG  
GGGAG

>ASV:2938:Genus:Barnesiella  
TACGTAGGGTGGCAGCGTTAATCCGGAATTACTGGGCGTAAAGGGTGCCTAGGCGGCACGCCAAGTCAGCGGTGAAAATTC  
CGGGCTCAACCCGAGTGTGCCGTTGAAACTGGCGAGCTAGAGTACACAAGAGGCAGGCGGAATGCGTGGTGTAGCGGTG  
AAATGCTTAGATATCACGAAGAAGTCCGATTGCGAAGGCAGCTACTGGACTGTAAGTACGCTGATGCTCGAAAGTGTG  
GGTAT

>ASV:2939:Family:Muribaculaceae  
TACGGAGGATGCGAGCGTTATCCGGATTTATTGGGTTAAAGGGTGCCTAGGCGGGCTGATAAGTCAGCGGTTAAAATGC  
GGTGCTCAACCGTAGTGCCTGTTGAAACTGTCCGCTTGTAGTGCAGGAGAGTATGCGGAATGCGTGGTGTAGCGGTG  
AATGCATAGATATCACGGAAGTCCGATTGCGAAGGCAGCATAACCGCGCTCAACTGACGCTGAGGACGAAAGCGGTG  
GTATC

>ASV:2940:Genus:Lachnospiraceae\_NK4A136\_group  
TACGTAGGGGGCAAGCGTTATCCGGATTTACTGGGTGTAAGGGAGCGTAGACGGCACAGCAAGTCTGATGTGAAAAGCCC  
GGGGCCAAACCCGGAAGTGCATTGAAACTGCTGGGCTTGTAGTGCAGGAGAGGTAAGCGGAATTCCTAGTGTAGCGGTG

AAATGCGTAGATATTAGGAGGAACACCAGTGGCGAAGGCGGCTTACTGGATTGTAACGACGTTGAGGCTCGAAAGCGTG  
GGGAG  
>ASV:2941:Genus:Dialister  
TACGTAGGTGGCAAGCGTTGTCCGGAATTATTGGGCGTAAAGCGCGCAGGCGGCTTCCCAAGTCCCTCTTAAAAGTGC  
GGGGCTTAACCCCGTATGGGAAGGAACTATGGAAGTGGAGTATCGGAGAGGAAAGCGGAATTCCTAGTGTAGCGGTGA  
AATGCGTAGATATTAGGAAGAACACCAGTGGCGAAGGCGACCTACTGGGCACCAACTGACGCTGAGGCTCGAAAGCATGG  
GTAGC  
>ASV:2942:Genus:Bacteroides  
TACGGAAGGTCCGGGCGTTATCCGGATTTATTGGGTTTAAAGGGAGCGTAGATGGATGTTTAAAGTCAGTTGTGAAAGTTT  
GCGGCTCAACCGTAAAATTGCAGTTGATACTGGCAGTCTTGAGTGCAGTAGAGGTGGGCGGAATTCGTGGTGTAGCGGTG  
AAATGCTTAGATATCACGAAGAACTCCGATTGCGAAGGCAGCTCACTGGAGCGCAACTGACGCTGAAGCTCGAAAGTGGC  
GGTAT  
>ASV:2943:Family:Coriobacteriales\_Incertae\_Sedis  
TACGTATGGTGCAGCGTTATCCGGAATCATTGGGCGTAAAGCGCGGTAGGCGGCTTGTAAAGCAGGAATTCAAATCTT  
GGGGCTCAACCTCAAGCCGGTCTGAACTGGCAGGCTCGAGTGCAGTAGAGGAAGGTGGAATTCCTAGTGTAGCGGTGA  
AATGCGCAGATATTGGGAAGAACACCAGTGGCGAAGGCGACCTTCTGGGCCCGCACTGACGCTGAGGCGCGAAAGCTAGG  
GGAGC  
>ASV:2944:Order:Clostridiales  
TACGGAGGATCCGAGCGTTATCCGGATTTATTGGGTTTAAAGGGAGCGTAGGCGGGTGTAAAGTCAGTTGTGAAAGTTT  
GCGGCTCAACCGTAAAATTGCAGTTGATACTGGATATCTTGAGTGCAGGAGGGGTGAGTGGAAATTCCTAGTGTAGCGGTG  
AAATGCGTAGATATTAGGAGGAACACCAGTGGCGAAGGCGGCTTACTGGACTGTAACGACGTTGAGGCTCGAAAGCGTG  
GGGAG  
>ASV:2945:Family:Lachnospiraceae  
TACGTAGGGGGCAAGCGTTATCCGGAATTTACTGGGTGTAAGGGAGCGTAGACGGTGTGGCGAGTCTGATGTGAAAGGCT  
GGGGCTTAACCCGAGACTGCATTGGAAGTGTCTTCTTGGTGCAGGAGGTAAGCGGAATTCCTAGTGTAGCGGTG  
AAATGCTTAGATATCACGAAGAACTCCGATTGCGAAGGCAGCTTACTGGACTGTAACGACGCTGATGCTCGAAAGCGTG  
GGGAG  
>ASV:2946:Class:Bacteroidia  
TACGGAGGATCCGAGCGTTATCCGAATTTATTGGGTTTAAAGGGAGCGTAGGTTGGACAGTTAAGTCAGTTGTGAAAGTTT  
GCGGCTCAACCGTAAAATTGCAGTTGATACTGGCTGTCTTGAGTGGAGTAGAGGCAAGCGGAATTCGAGTGTAGCGGTG  
AAATGCGTAGATATTAGGAGGAACACCAGTGGCGAAGGCGGCTTACTGGGCTCTAACTGACGCTGAGGCTCGAAAGTGTG  
GGGAG  
>ASV:2947:Genus:Agathobacter  
TACGTAGGGGGCAAGCGTTATCCGGAATTTACTGGGTGTAAGGGAGCGCAGGCGGTGCGGCAAGTCTGATGTGAAAGCCC  
GGGGCTCAACCCCGTACTGCATTGGAAGTGTCTGACTAGAGTGTGCGGAGGGTAAGCGGAATTCCTAGTGTAGCGGTG  
AAATGCGTAGATATTAGGAGGAACACCAGTGGCGAAGGCGGCTTACTGGGCTTAACTGACGCTGAAGCACGAAAGCATG  
GGTAG  
>ASV:2948:Genus:Family\_XIII\_AD3011\_group  
TACGTAGGGGGCAAGCGTTATCCGGAATTTATTGGGCGTAAAGCGTACGTAGGTGTTACCTAAGCACAGGGTTTAAAGGCT  
ATGGCTTAACTATAGTTCGCCTTGTGAACTGGGCTACTTGGTGCAGGAGAGGAAAGCGGAATTCCTAGTGTAGCGGTGA  
AATGCGTAGATATTAGGAGGAACACCAGTGGCGAAGGCGGCTTCTGGACTGTAACGACACTGAGGTACGAAAGCGTGG  
GGAGC  
>ASV:2949:Genus:Erysipelatoclostridium  
TACGTAGGTGGCGAGCGTTATCCGGAATTTACTGGGCGTAAAGAGGGAGCAGGCGGCAGCAAGGGTCTCGGTTGAAAGACT  
GAAGCTCAACTTCAGTAAGCCGCGGAAACCGGGCAGCTAGAGTGCAGGAGAGGACCGTGGAAATTCATGTGTAGCGGTGA  
AATGCGTAGATATTAGGAGGAACACCAGTGGCGAAGGCGACGGTCTGGACTGCAACTGACGCTCAGTCCGAAAGCGTGG  
GGAGC  
>ASV:2950:Genus:UBA1819  
AACGTAGGGTGAAGCGTTGTCCGGAATTTACTGGGTGTAAGGGAGCGCAGGCGGATTGGCAAGTTGGGAGTGAATCTA  
TGGGCTCAACTCATAAATTGCTTTCAAAGTGTGAGTCTTGGTGTAGAGGTAGGCGGAATTCCTAGTGTAGCGGTG  
GAATGCGTAGATATTAGGAGGAACACCAGTGGCGAAGGCGGCTTACTGGGCTAACTGACGCTGAGGCTCGAAAGCATG  
GGTAG  
>ASV:2951:Family:Bifidobacteriaceae  
TACGTAGGGTGAAGCGTTATCCGGAATTTATTGGGCGTAAAGGGCTCGTAGGCGGTTCTGACGCTCCGGTGTGAAAGTCC  
ATCGCTTAAACGGTGGATCCGCGCCGGTACGGGCGGCTTGGTGCAGTGGAGGAGACTGGAATTCGTGGTGTAGCGGTG  
AAATGCTTAGATATCACGAAGAACTCCGATTGCGAAGGCAGCTGCTAAGCTGCAACTGACATTGAGGCTCGAAAGTGTG  
GGTAT  
>ASV:2952:Genus:Ruminococcaceae\_UCG-007  
TACGTAGGTGGCAAGCGTTGTCCGGAATTTACTGGGTGTAAGGGCGCGTAGGCGGGATGCAAGTCAAGGAGTGAATCTA  
GGGGCTCAACCCCTAAACTGCTTTTGAAGTGTATTCTTGGTATCGGAGAGGCGGCGGAATTCCTAGTGTAGCGGTG  
AAATGCGTAGATATTAGGAGGAACACCAGTGGCGAAGGCGGCTGCTGGACGACAACGACGCTGAGGCGCGAAAGCGTG  
GGGAG  
>ASV:2953:Genus:Anaerofilum  
AACGTAGGTGGCAAGCGTTGTCCGGAATTTACTGGGTGTAAGGGAGCGCAGGCGGAAGTGAAGTGGTGTCAAATCTA  
CGGGCTTAAACCGTATCCGCACTCAAAGTGTAGTCTTGGTGTAGTGCAGAGGTAGGCGGAATTCCTAGTGTAGCGGTG  
AATGCGTAGATATTAGGAGGAACACCAGTGGCGAAGGCGGCTTACTGGGCACCAACTGACGCTGAGGCTCGAAAGTATGG  
GTAGC  
>ASV:2954:Order:Bacteroidales

TACGGAGGATCCGAGCGTTATCCGGATTTATTGGGTTAAAGGGAGCGTAGATGGATGTTTAAAGTCAGTTGTGAAAAGTTT  
GCGGCTCAACCGTAAAATTGCAAGTGTACTGGGCGCCTTGAGTGCAGCATAGGTAGCGGAATTCCTAGTGTAGCGGTG  
AAATGCGTAGATATTAGGAGGAACACCAGTGGCGAAGGCGGCTTGTGGCTTTAACTGACGCTGAAGCTCGAAAGCGTG  
GGGAG

>ASV:2955:Genus:Paraprevotella

TACGGAGGATCCGAGCGTTATCCGGATTTATTGGGTTAAAGGGAGCGTAGGCGGGCTTTTAAAGTCAGCGGTCAAATGTC  
GTGGCTCAACCATGTCAAGCGGTTGAAACTGTAAGCCTTGAGTCTGCACAGGGCACATGGAATTCGTGGTGTAGCGGTGA  
AATGCTTAGATATCACGAAGAACTCCGATTGCGAAGGCAGCTCACTGGAGCGCAACTGACGCTGAAGCTCGAAAGTGGC  
GTATC

>ASV:2956:Family:Lachnospiraceae

TACGTATGGTCAAGCGTTATCCGGATTTACTGGGTGTAAAGGGAGCGTAGACGGCATGGCAAGTCTGAAGTAAAAGGCA  
TGGGCTCAACCCGTTGGACTGCTTTGAAACTGTCAAGCTAGAGTGTCCGAGAGGCAAGTGAATTCCTAGTGTAGCGGTG  
AAATGCGTAGATATTAGGAGGAACACCAGTGGCGAAGGCGGCTTGTGGACGATGACTGACGTTGAGGCTCGAAAGCGTG  
GGGAG

>ASV:2957:Genus:GCA-900066755

TACGGAGGATCCGAGCGTTATCCGGATTTATTGGGTGTAAAGGGAGCGTAGACGGAGCAGCAAGTCTGATGTAAAACCC  
GGGGCTCAACCCGGGACTGCATTGAAACTGTTGATCTGGAGTGCCGGAGAGGTAAGCGGAATTCGTGGTGTAGCGGTG  
AAATGCTTAGATATCACGAAGAACTCCGATTGCGAAGGCAGCTGCTGGACTGTAACGACGCTGAGGCTCGAAAGTGGC  
GGTAT

>ASV:2958:Family:Lachnospiraceae

TACGTAGGGGGCAAGCGTTATCCGGATTTACTGGGTGTAAAGGGAGCGTAGACGGTGGGATAAGTCAGAAGTAAAAGCCC  
GGGGCTCAACCCGGGACTGCTTTGAAACTGTTCTGCTAGAGTGCAGGAGAGGTAAGTGAATTCCTAGTGTAGCGGTG  
AAATGCGTAGATATTAGGAGGAACACCAGTGGCGAAGGCGGCTTACTGGACTGTAACGACGTTGAGGCTCGAAAGCGTG  
GGGAG

>ASV:2959:Genus:Dialister

TACGTAGGTGGCAAGCGTTGTCCGGAATTATTGGGCGTAAAGCGCGCAGGCGGCTTCTTAAGTCCATCTTAAAAGCGT  
GGGGCTCAACCCATGAGGGGATGAAACTGGGAAGCTGGAGTATCGGAGAGGAAAGTGAATTCCTAGTGTAGCGGTGA  
AATGCGTAGAGATTAGGAAGAACCCGGTGGCGAAGGCGACTTTCTGACGAAAACCTGACGCTGAGGCGGAAAGCGTGG  
GGAGC

>ASV:2960:Genus:Veillonella

TACGTAGGTGGCAAGCGTTGTCCGGAATTATTGGGCGTAAAGCGCGCAGGCGGCTTCTTAAGTCCATCTTAAAAGTTC  
GGGGCTTAACTCCGTGATGGGATGAAACTGCCAATCTAGAGTATCGGAGAGGAAAGTGAATTCCTAGTGTAGCGGTGA  
AATGCGTAGATATTAGGAAGGACACCAGTGGCGAAGGCGACTTTCTGGACGAAAACCTGACGCTGAGGCGGAAAGCCAGG  
GGAGC

>ASV:2961:Genus:Blautia

TACGTAGGGGGCAAGCGTTATCCGGATTTACTGGGTGTAAAGGGAGCGTAGACGGTGTGGCAAGTCTGATGTGAAAGGCA  
TGGGCTCAACCCGTGAGACTGCAATTGAAACTGTACACTTGAAGTGCAGGAGGTAAGCGGAATTCCTAGTGTAGCGGTG  
AAATGCGTAGATATATGGAGGAACCCAGTGGCGAAGGCGACGATCTGGCGCATAACTGACGCTCAGTCCCAGAAAGCGTG  
GGGAG

>ASV:2962:Genus:Phascolarctobacterium

TACGTAGGTGGCGAGCGTTGTCCGGAATTATTGGGCGTAAAGAGCATGTAGGCGGTTTTTAAAGTCTGGAGTAAAATGC  
GGGGCTCAACCCGTATGGCTCTGGACTGAAACTTGTAGTGCAGGAGAGGAAAGGGGAATTCCTAGTGTAGCGGTGA  
AATGCGTAGATATTGGGAGGAACACCAGTGGCGAAGGCGCCTTTCTGGACTGTGTCTGACGCTGAGATGCGAAAGCCAGG  
GTAGC

>ASV:2963:Genus:Parabacteroides

TACGGAGGATCCGAGCGTTATCCGGATTTATTGGGTTAAAGGGTGCCTAGGCGGCTTTTAAAGTCAAGCGGTGAAAGTCT  
GTGGCTCAACCATAGAAATTGCCGTTGAAACTGGGGGCTTGAGTATGTTTGAAGCAGCGGAATGCGTGGTGTAGCGGTG  
AAATGCATAGATATCACGCAGAACCCGATTGCGAAGGCAGCTTGTAACTGTAACGACGTTATGCTCGAAAGTGTG  
GGTAT

>ASV:2964:Genus:Subdoligranulum

AACGTAGGTTGCAAGCGTTGTCCGGAATTACTTGGTGTAAAGGGAGCGCAGGCGGACCAGTGGCAAGTGGAAAGTAAATCCA  
TGGGCTCAACCCGTGAATTGCTTTCAAACCTGCTGGCCTTGAGTAGTGCAGAGGTAGGTGGAATTCCTGTGTAGCGGTG  
GAATGCGTAGATATCGGAGGAACACCAGTGGCGAAGGCGACCTACTGGGCACCAACTGACGCTGAGGCTCGAAAGCATG  
GGTAG

>ASV:2965:Genus:Subdoligranulum

AACGTAGGTTGCAAGCGTTGTCCGGAATTACTTGGTGTAAAGGGAGCGCAGGCGGACCAGTGGCAAGTGGAAAGTAAAACCTA  
TGGGCTCAACCCATAAATTGCTTTCAAACCTGTTGGCCTTGAGTAGTGCAGAGGTAGGTGGAATTCCTGGTGTAGCGGTG  
GAATGCGTAGATATCGGAGGAACACCAGTGGCGAAGGCGACCTACTGGGTATCAACTGACGCTGAGGCTCGAAAGCATG  
GGTAG

>ASV:2966:Family:Christensenellaceae

TACGTAGGGAGCAAGCGTTGTCCGGAATTACTGGGCTAAAGGGTGCCTAGGCGGTTTTGATAAGTCAAGTGTGAAATATT  
CGGGCTTAACTGGAGGGTGCATTTGAAACTGTACAGCTTGAAGTGCAGGAGAGGAAAGCGGAATTCCTAGTGTAGCGGTG  
AAATGCGTAGATATTAGGAGGAACACCAGTGGCGAAGGCGGCTTTCTGGACTGTAACGACGCTGAGGCTCGAAAGCGTG  
GGGAG

>ASV:2967:Genus:Defluviitaleaceae\_UCG-011

TACGTAGGGGGCGAGCGTTATCCGGAATTACTGGGTGTAAAGGGTGCCTAGGCGGTACGGCAAGTTTTGATGTGAAACCTT  
CGGGCTTAAACCCGAGGCATGCATCGAAAACACAGAAGTGCAGGAGAGGAAAGCGGAATTCCTAGTGTAGCGGTG  
AAATGCGTAGATATTAGGAAGAACACCAGTGGCGAAGGCGGCTTTCTGGACTGTAACGACGCTGAGGCTCGAAAGCGTG

GGGAG  
>ASV:2968:Class:Bacteroidia  
TACGGAGGATCCGAGCGTTATCCGGATTTATTGGGTTTAAAGGGAGCGTAGGCGGACGCTTAAGTCAGTTGTGAAAATTT  
GCGGCTCAACCGTAAAATTGCAGTTGATACTGGGTGCTTGGATATCGGAGAGGCAATCGGAATTCCTAGCGTAGCGGTG  
AAATGCGTAGATATTAGGAGGAACACCCAGTGGCGAAGGCGGATTGCTGGACGACAACGACGGTGAGGCGCAAAGCGTG  
GGGAG  
>ASV:2969:Order:Bacteroidales  
TACGTATGGAGCAAGCGTTATCCGGATTTATTGGGTTTAAAGGGAGCGTAGATGGATGTTTAAAGTCAGTTGTGAAAATTT  
GCGGCTCAACCGTAAAATTGCAGTTGATACTGGATATCTTGGAGTGCAGTAGAGGTAAGCGGAATTCCTAGTGTAGCGGTG  
AAATGCGTAGATATTAGGAGGAACATCAGTGGCGAAGGCGGCTTACTGGGCTTAACTGACGCTGAGGCTCGAAAAGCGTG  
GGGAG  
>ASV:2970:Order:Bacteroidales  
TACGGAGGATCCGAGCGTTATCCGGATTTATTGGGTTTAAAGGGAGCGTAGGTGGATTGTTAAGTCAGTTGTGAAAATTT  
GCGGCTCAACCGTAAAATTGCAGTTGAACTGGCAGTCTTGGATACAGTAGAGGTAGGCGGAATTCCTGGTGTAGCGGTG  
AAATGCGTAGAGATCGGGAGGAACACCCAGTGGCGAAGGCGGCTTACTGGGCTGTAACGACGCTGAGGCACGAAAAGCATG  
GGTAG  
>ASV:2971:Family:Ruminococcaceae  
TACGTAGGGAGCGAGCGTTGTCCGGAATGACTGGGTGTAAGGGAGCGTAGGCGGGACGGAAGTCAGATGTGAAACCTG  
AGGGCTCAACCTTCCAGACTGCATTTGAACTGCTGTTCTTGGAGTGAAGTAGAGGTAAGCGGAATTCCTGGTGTAGCGGTG  
AAATGCTTAGATATCACGAAGAACCCGATTGCGAAGGCAGTCACTAGACTGCAACGACACTGATGCTCGAAAAGTGTG  
GGTAT  
>ASV:2972:Genus:Lactobacillus  
TACGTAGGTGCAAGCGTTGTCCGGATTTATTGGGCTTAAAGCGAGCGCAGGCGATTTCTTAAGTCAGTTGTGAAAAGCTT  
TCGGCTCAACCGAAGAAGTGCATCGGAACTGGGAACTTGGAGTGCAGAAGAGGACAGTGGAACTCCATGTGTAGCGGTG  
AAATGCGTAGATATATGGAAGAACACCCAGTGGCGAAGGCGGCTGCTGGTCTGTAACGACGCTGAGGCTCGAAAAGCATG  
GGTAG  
>ASV:2973:Species:arthrosphaerae/contaminans/cucumeris/culicis/gleum/indologenes/jejuense/  
joostei/lactis/letacus/oncorhynchi/rhizosphaerae/tructae/ureilyticum/viscerum  
TACGGAGGGTGAAGCGTTATCCGGATTTATTGGGTTTAAAGGGTCCGTAGGCGGATCTGTAAGTCAGTGGTGAATCTC  
ACAGCTTAACTGTGAACTGCCATTGATACTGCAGGCTTGGAGTGTGTTGAAAGTAGCTGGAATAAGTAGTGTAGCGGTG  
AAATGCATAGATATTACTTAGAACCAATTGCGAAGGCAGGTTACTAAGCAACAACGACGCTGATGGACGAAAAGCGTG  
GGGAG  
>ASV:2974:Genus:Atopobium  
TACGTAGGGGGCAAGCGTTATCCGGATTCATTGGGCGTAAAGCGCTCGTAGGCGGTCTGTTAGGTGGGAGTTAAATCCG  
GGGGCTCAACCCCGCTCGCTCCCGATACCGCAGACTTGGATTTGGTAGGGGAAGGTGGAATTCCTAGTGTAGCGGTGG  
AATGCGCAGATATTAGGAAGAACACCCAGTGGCGAAGGCGGCTTCTGGGCCATAACTGACGCTGAGGAGCGAAAAGCTAGG  
GGAGC  
>ASV:2975:Family:Lachnospiraceae  
TACGTATGGTGAAGCGTTATCAGGATTTACTGGGTGTAAGGGAGCGTAGACGGAGTGGCAAGTCTGATGTGAAAACCC  
GGGGCTCAACCCCGGACTGCATTGGAACCTGCAATCTGGAGTACCGGAGAGGTAAGCGGAATTCCTAGTGTAGCGGTG  
AAATGCGTAGATATTAGGAGGAACACCCAGTGGCGAAGGCGGCTTACTGGACGGTAACGACGTTGAGGCTCGAAAAGCGTG  
GGGAG  
>ASV:2976:Species:piscolens  
TACGTAGGGAGCGAGCGTTGTCCGGAATTACTGGGCGTAAAGGGCGCGTAGGCGGCGCTTCAAGTCGTCTGTCAAAGCC  
GAGGCTCAACCTCGGTGCGCAGACGAACTGGAGAGCTTGAAGAGCAGAGAGGCAAACAGAATTCCTGGTGTAGCGGTGA  
AATGCGTAGATATCAGGAAGAATACCCAGTGGCGAAGGCGGTTTCTGGCTGCATACTGACGCTGAAGCGGAAAAGCCAGG  
GGAGC  
>ASV:2977:Family:Ruminococcaceae  
TACGTAGGGAGCGAGCGTTATCCGGATTTACTGGGTGTAAGGGAGCGTAGGCGGGATGCCAAGTCAGTGTGAAAACCTA  
TGGGCTTAACTGTAGACTGCAGTTGAACTGGTATTCTTGGAGTGAAGTAGAGGTTGGCGGAATTCCTAGTGTAGCGGTG  
AAATGCTTAGATATCACGAAGAACCCGATTGCGAAGGCAGTCTGCTGGACTGTAACGACGCTGATGCTCGAAAAGTGTG  
GGTAT  
>ASV:2978:Family:Lachnospiraceae  
TACGTAGGGGGCAGGCGTTATCCGGATTTACTGGGTGTAAGGGAGCGTAGACGGTGTGGCAAGTCTGATGTGAAAAGGCA  
TGGGCTCAACCCGTGGACTGCATTGGAACCTGCATACTTGGAGTGCAGGAGGGTAAGCGGAATTCCTAGTGTAGCGGTG  
AAATGCGTAGATATTGGGAGGAACACCCAGTGGCGAAGGCGGCTTCTGGACTGTGCTGACGCTGAGATGCGAAAAGCCAG  
GGTAG  
>ASV:2979:Genus:Family\_XIII\_AD3011\_group  
TACGTAGGGGGCGAGCGTTATCCGGATTTATTGGGCTTAAAGAGTGCCTAGGTGGTAACTTAAAGCGCGGGTTTAAAGGCA  
ATGGCTTAACTATTGTTCCGCTGCGAACTGGGATACTTGGATGCAGGAGAGGAAAGCGGAATTCCTAGTGTAGCGGTGA  
AATGCGTAGATATTAGGAGGAACACCCAGTGGCGAAGGCGGCTTCTGGACTGAACTGACACTGAGGCACGAAAAGTGTG  
GGAGC  
>ASV:2980:Genus:Prevotella\_2  
TACGGAAGATGCGAGCGTTATCCGGATTTATTGGGTTTAAAGGGAGCGTAGGCGGCTGTTGTAAGCGTGTGTGAAAATGTC  
GGGGCTCAACCTGGGCTTGCAGCGGAACTGTCAGACTTGGAGTGCAGCGGGAAGTAGGCGGAATTCCTGCTGTAGCGGTG  
AAATGCGTAGATATTAGGAGGAACACCCAGTGGCGAAGGCGGCTTCTGGACTGTAACGACGCTGAGGCTCGAAAAGCGTG  
GGGAG  
>ASV:2981:Family:Lachnospiraceae

TACGTATGGTGCAAGCGTTATCCGGATTTACTGGGTGTAAAGGGAGCGTAGACGGATAGGCAAGTCTGGAGTGAAAAGCCC  
GGGGCTCAACCCCGGACTGCTTTGAAAAGTGTATCTGGAGTGTGGAGAGGTAAGTGGAATTCCTAGTGTAGCGGTG  
AAATGCGTAGATATTAGGAGGAACACCAGTGGCGAAGGCGGCTTACTGGACAGTAACGACGTTGAGGCTCGAAAAGCGTG  
GGGAG  
>ASV:2982:Order:Bacteroidales  
TACGGAGGATACGAGCGTTATCCGGAATTATTGGGTTTAAAGGGTGCCTAGGTGGCTATTTAAGTCAGGGGTGAAAAGCA  
TGAGCTCAACTCATGTCTTGCCTTTGAAAAGTGGACAGCTAGAGAAAAGACGAGGTATGTGGAATGTGTGGTGTAGCGGTG  
AAATGCGTAGATATCACGAAGAACCAGTGGCGAAGGCGGCTGCTAAGCTGCAACTGACATTGAGGCTCGAAAAGTGTG  
GGTAT  
>ASV:2983:Phylum:Firmicutes  
TACGTAGGCGCGAGCGTTATCCGGAATTATTGGGCGTAAAGAGCGCGCAGGTGGTTGATTAAGTCTGATGTGAAAAGCCC  
ACGGCTTAACCGTGGAGGTCATTGAAAAGTGGTCAACTTGAAGTGCCTGGAGGGGTAAGCGGAATTCCTAGTGTAGCGGTG  
AAATGCGTAGATATTAGGAGGAACACCAGTGGCGAAGGCGGCTTACTGGACGGTAACGACGTTGAGGCTCGAAAAGCGTG  
GGGAG  
>ASV:2984:Genus:Lachnospiraceae\_FCS020\_group  
TACGTAGGGGCAAGCGTTATCCGGATTTACTGGGTGTAAAGGGAGCGTAGACGGCTTTGCAAGTCTGACGTGAAAAGCCC  
GGGGCTCAACTCCGGAAGTGCCTTTGAAAAGTGAAGGCTTGAAGTGCCTGGAGAGGTAAGCGGAATTCCTAGTGTAGCGGTG  
GAATGCGTAGATATTAGGAGGAACACCAGTGGCGAAGGCGGCTTACTGGACTGTAACGACACTGAGGCACGAAAAGCATG  
GGTAG  
>ASV:2985:Genus:Ruminococcaceae\_UCG-007  
TACGTAGGTGGCAAGCGTTGTCCGGATTTACTGGGTGTAAAGGGCGCGTAGGCGGGATAGCAAGTCAGATGTGAAATCTA  
TGGGCTTAACCCATAAACTGCATTTGAAAAGTGTATCTTGAAGTATCGGAGAGGCAGGCGGAATTCCTAGTGTAGCGGTG  
AAATGCGTAGATATTAGGAGGAACACCAGTGGCGAAGGCGGCTGCTGGACGACAACGACGCTGAGGCGCGAAAAGCGTG  
GGGAG  
>ASV:2986:Family:Lachnospiraceae  
TACGTATGGTGCAAGCGTTATCCGGATTTACTGGGTGTAAAGGGAGCGTAGACGGAGCAGCAAGTCTGGAGTGAAAAGCCC  
GGGGCTCAACCCCGGACTGCTTTGAAAAGTGTGTTCTAGAGTGTGGAGAGGTAAGTGGAATTCCTAGTGTAGCGGTG  
AAATGCGTAGATATTAGGAGGAACACCAGTGGCGAAGGCGGCTTACTGGACAGTAACGACGTTGAGGCTCGAAAAGCGTG  
GGGAG  
>ASV:2987:Family:Lachnospiraceae  
TGCATATGGTGCAAGCGTTATCCGGATTTACTGGGTGTAAAGGGAGCGTAGACGGATGGGCAAGTCTGATGTGAAAAGCCC  
GGGGCTCAACCCCGGACTGCTTTGAAAAGTGTGTTCTAGAGTGTGGAGAGGTAAGTGGAATTCCTAGTGTAGCGGTG  
AAATGCGTAGATATTACGAAGAACCAGTGGCGAAGGCGGCTGCTAAGCTGCAACTGACATTGAGGCTCGAAAAGTGTG  
GGTAT  
>ASV:2988:Family:Fusobacteriaceae  
TACGTATGTCGCAAGCGTTATCCGGATTTACTGGGCGTAAAGCGCGTCTAGGCGGTTTGGTAAGTCTGATGTGAAAATGC  
GGGGCTCAACTTGGGTGCTGCTTTGAAAAGTGTGCAAGTCTAGAGTGTGGAGAGGTAAGCGGAATTCCTAGTGTAGCGGTG  
AATGCGTAGATATCGGGAGGAACACCAGTGGCGAAGGCGGCTTACTGGGACCAACTGACGCTGAGGCTCGAAAAGCATGG  
GTAGC  
>ASV:2989:Family:Clostridiaceae\_1  
TACGTAGGTGGCAAGCGTTGTCCGGATTTACTGGGCGTAAAGGGAGCGTAGGCGGACTTTTAAGCGAGATGTGAAATACC  
CGGGCTCAACTTGGGTGCTGCTTTGAAAAGTGTGCAAGTCTAGAGTGTGGAGAGGTAAGCGGAATTCCTAGTGTAGCGGTG  
AAATGCGTAGAGATTAGGAAGAACCAGTGGCGAAGGCGGCTTACTGGACGGTAACGACGTTGAGGCTCGAAAAGTGTG  
GGTAT  
>ASV:2990:Species:pullicaecorum  
TACGTAGGGAGCAAGCGTTATCCGGATTTACTGGGTGTAAAGGGCGTGTAGGCGGGCTTGTAAAGTGGAAAGTGAATCTC  
GGGGCTTAACCCCGGACTGCTTTGAAAAGTGTGCAAGTCTAGAGTGTGGAGAGGCAGGCGGAATTCCTAGTGTAGCGGTG  
AAATGCGTAGATATTGGGAGGAACACCAGTGGCGAAGGCGGCTGCTGGACATTAACGACGCTGAGGCGCGAAAAGCGTG  
GGGAG  
>ASV:2991:Genus:Ruminococcus\_1  
TACGTAGGGAGCGAGCGTTGTCCGGAATTACTGGGTGTAAAGGGAGCGTAGGCGGGATGGCAAGTCAGATGTGAAAAGTCA  
TGGGCTCAACCCATAGACTGCAATTTGAAAAGTGTGTTCTTGAAGTGTGGAGAGGTAAGCGGAATTCCTGGTGTAGCGGTG  
AAATGCGTAGAGATGGGAGGAACACCAGTGGCGAAGGCGGCTGCTGGGCTTTAAGTGTGACGCTGAGGCACGAAAAGCGTG  
GGGAG  
>ASV:2992:Family:Mitochondria  
TACGGGGGGGCAAGTGTCTTCCGGAATGACTAGGCGTAAAGGGCACTACGGCAGTGAATCGGGTTGCAAGTTCAGTGTG  
CCAAAACCGGCGGAATGCTCTCGAAACCAATTCCTTGAAGTGTGGAGAGGAGAGTTCATTTCTGTGTAGGGGTTAA  
ATCCGTAGATCTACGAAGGAAGGCCAAAAGCGAAGGCGAGCTCTTGGGCTCCCTACTGACGCTGAGGTGCGAAAAGCATGG  
GAGCA  
>ASV:2993:Genus:Caproiciproducens  
TACGTAGGGAGCGAGCGTTGTCCGGAATTACTGGGTGTAAAGGGTGCCTAGGCGGCTGTGCAAGTCAGGCGTGAATGCA  
GGGGCTTAACCCCTGAGCTGCGTTTGAAGTGTGCAAGTGTGGAGAGGTAAGCGGAATTCCTGGTGTAGCGGTG  
AAATGCGTAGAGATCGGGAGGAACACCAGTGGCGAAGGCGGCTTACTGGGCTTTAAGTGTGACGCTGAGGCACGAAAAGCATG  
GGTAG  
>ASV:2994:Genus:Propionibacterium  
TACGTAGGGTGCAGCGTTGTCCGGATTTATTGGGCGTAAAGAGCTTGTAGGCGGTTGATTGCGTCAAAGTGTGAAAAGTCA  
AGGGCTTAACCTGAGCCTGCTTTGATAACGGTGTGACTTGAAGTGTAGGGAGAGGTAAGCGGAATTCCTGGTGTAGCGGTG  
GAATGCGCAGATATCGGGAGGAACACCAGTGGCGAAGGCGGCTTCTGACATTTCTGACGCTGAGAAAGCGAAAAGCGTG

GGGAG

>ASV:2995:Genus:DNF00809

CACGTAGGGGGCGAGCGTTATCCGGATTTCATTGGGCGTAAAGCGCGCTAGGCGGCCGCTCAAGCGGGACCTCTAATCCC  
GGGGCTCAACCCCGGGCCGGGTCCGAACTGGGCGGCTCGAGTCAGGTAGAGGCAGGCGGAATTCCTAGTGTAGCGGTGA  
AATGCGCAGATATCGGGAAGAACACCGATGGCGAAGGCAGCCTGCTGGGCTGCACTGACGCTGAGGCGGAAAGCGGG  
GGAGC

>ASV:2996:Genus:Family\_XIII\_UCG-001

TACGTAGGGGGCAAGCGTTATCCGGATTTCATTGGGCGTAAAGAGTACGTAGGCGGTTTCTAAGCGCAAGGTGAAAGGCA  
GTGGCTTAACCATTTGAAGCCTTGCGAACTGACAGACTTGAGTGCAGGAGAGGAAAGCGGAATTCCTAGTGTAGCGGTGA  
AATGCGTAGATATTAGGAGGAACACCGGTGGCGAAGGCGGTTTCTGGACTGTAAGTACGCTGAGGTACGAAAGCGTGG  
GGAGC

>ASV:2997:Family:Lachnospiraceae

TACGTAGGGGGCAAGCGTTATCCGGATTTCATTGGGCGTAAAGGTAGGCTAGACGGCGGAGCAAGTCTGAAGTAAAAGCCC  
GGGGCTCAACCCCGGGACTGCTTTGAAACTGTTCTGCTAGAGTGTGGAGAGGTAAGTGAATTCCTAGTGTAGCGGTG  
AAATGCGTAGATATTAGGAGGAACACCGAGTGGCGAAGGCGGTTACTGGACAGTAAGTACGCTTGGAGCTCGAAAGCGTG  
GGAG

>ASV:2998:Genus:Lachnospira

TACGTATGGAGCAAGCGTTATCCGGATTTCATTGGGCGTAAAGGGAGTGTAGGTGGCCAGGCAAGTCAAGTAAAAGCCC  
GGGGCTCAACCCCGGGATTGCTTTGAAACTGCAGGGCTAGAGTGCAGGAGGGGCAAGTGAATTCCTAGTGTAGCGGTG  
AAATGCGTAGATATTAGGAGGAACACCGAGTGGCGAAGGCGGTTACTGGACTGTAAGTACGCTTGGAGCTCGAAAGCGTG  
GGAG

>ASV:2999:Family:Ruminococcaceae

TACGTAGGTGGCAAGCGTTGTCCGGATTTCATTGGGCGTAAAGGGCGTGTAGGCGGGTTAGTAAGTCAAGTGTAAATACC  
GGGGCTCAACTCCGGGGCTGCATTTGAAACTGCAAATCTTGAAGTGTGGAGAGGAAAGCGGAATTCCTAGTGTAGCGGTG  
AAATGCGTAGATATTAGGAGGAACATCAGTGGCGAAGGCGGTTACTGGGCTTAAAGTACGCTTGGAGCTCGAAAGCGTG  
GGAG

>ASV:3000:Family:Rhodobacteraceae

TACGGAGGGGGCTAGCGTTGTCCGGATTTCATTGGGCGTAAAGCGCACGTAGGCGGACTGAAAGTTGGGGGTGAAATCCC  
GGGGCTCAACCTCGAACTGCCTTCAAACATCAGTCTGGAGTTCGAGAGAGGTGAGTGAATTCAGTGTAGAGGTG  
AAATTCGTAGATATTGGAGGAACACCGAGTGGCGAAGGCGGCTACTGGCTCGATACTGACGCTGAGGTGCGAAAGCGTG  
GGAG

>ASV:3001:Species:haemobos

TACATAGGTCGCAAGCATTATCCGGATTTCATTGGGCGTAAAGCAAGCGCAGGCGGATGTGTAAGTTCTGTGTTAAAAGTA  
GCTACTTAATAGTTGTTTGCACCGAATACTACATGTCTAGAATGTGGTAGGAAGTTTGAATTAACATGGAGCGGTGG  
AATGTGTAGATATGTTTAAAGAACACCGAGGCGAAGGCGAAACTTAGGCCATAAATGACGCTTAGGCTTGAAGTGTGG  
GGAGC

>ASV:3002:Genus:Anaerofustis

TACGTAGGGGGCGAGCGTTGTCCGGATTTCATTGGGCGTAAAGAGCACGTAGGCGGTTAATTAAGTCAAGTGTGAAAGTTT  
TCGGCTCAACCGGAAAGTGCCTTGAACCTGGATACTTGAAGTATCGGAGAGGTAAAGCGGAATTCCTAGTGTAGCGGTG  
AAATGCGTAGAGATTAGGAAGAACACCGGTGGCGAAGGCGGCTACTGGACGATAAGTACGCTTGGAGTGCAGAAAGCGTG  
GGAG

>ASV:3003:Species:laeviglucosivorans/yeei

TACGGAGGGGGCTAGCGTTGTCCGGATTTCATTGGGCGTAAAGCGCACGTAGGCGGACCGGAAAGTCAAGGTGAAATCCC  
AGGGCTCAACCTTGAAGTGCCTTGAACCTATCGGCTGGAGTTCGAGAGAGGTGAGTGAATTCAGTGTAGAGGTG  
AAATTCGTAGATATTGGAGGAACACCGAGTGGCGAAGGCGGCTACTGGCTCGATACTGACGCTTGGAGTGCAGAAAGCGTG  
GGAG

>ASV:3004:Genus:Parabacteroides

TACGGAGGATCCGAGCGTTATCCGGATTTCATTGGGTTTAAAGGGTGCCTAGGCGGCTTTTAAAGTCAAGGTGAAAGTCT  
GTGGCTCAACCATAGAAATTCGCTTGAACCTGGAGGCTTGAAGTATGTTTGAAGCAGGCGGAATGCGTGGTGTAGCGGTG  
AAATGCTTAGATATTAGGAGGAACACCGAGTGGCGAAGGCGGCTACTGGCCACCAACTGACGCTTGGAGTGCAGAAAGCGTG  
GGTAG

>ASV:3005:Family:Lachnospiraceae

TACGTAGGGGGCAAGCGTTATCCGGATTTCATTGGGCGTAAAGGGAGCGTAGACGGCATGGCAAGTCTGAAGTAAAACCC  
AGGGCTCAACCTGGGACTGCTTTGAAACTGCCAAGCTAGAGTGCAGGAGAGGTAAGTGAATTCCTAGTGTAGCGGTG  
AAATGCGTAGATATTAGGAGGAACACCGAGTGGCGAAGGCGGCTACTGGACTGTAAGTACGCTTGGAGCTCGAAAGCGTG  
GGAG

>ASV:3006:Genus:Roseburia

TACGTAGGGGGCAAGCGTTATCCGGATTTCATTGGGCGTAAAGGGAGCGCAGGCGGGAGGCTAAGTCTGATGTGAAAGCCC  
GGGGCTCAACTCCGGTACTGCATTGAAACTGGCCACTAGAGTGTGGAGGGGTAAGTGAATTCCTAGTGTAGCGGTG  
AAATGCGTAGATATTAGGAGGAACACCGAGTGGCGAAGGCGGCTACTGGACTGTAAGTACGCTTGGAGCTCGAAAGCGTG  
GGAG

>ASV:3007:Genus:Bacteroides

TACGGAGGATCCGAGCGTTATCCGGATTTCATTGGGTTTAAAGGGAGCGTAGGTGGATTGTTAAGTCAAGTGTGAAAGTTT  
GCGGCTCAACCGTAAAATTGCAGTTGAAACTGGGAGTCTTGAAGTACAGTAGAGGTGGGCGGAATTCGTGGTGTAGCGGTG  
AAATGCTTAGATATCACGAAGAACTCCGATTGCGAAGGCGAGTCACTAGACTGCTACTGACCTGATGCTCGAAAGCGTG  
GGAG

>ASV:3008:Genus:Family\_XIII\_AD3011\_group

TACGTAGGGGGCAAGCGTTATCCGGATTTCATTGGGCGTAAAGAGTACGTAGGTGGTTTCTAAGCACGGGGTTAAGGCA

ATGGCTTAACCTATTGTTTCGCCTTGTGAACTGGAAGACTTGAGTGCAGGAGAGGAAAGCGGAATTCCTAGTGTAGCGGTGA  
AATGCGTAGATATTAGGAGGAACACCAGTGGCGAAGGCGGCTTTCTGGACTGTAACCTGACACTGAGGTACGAAAGCGTGG  
GGAG

>ASV:3009:Genus:Bacteroides

TACGGAGGATCAAGCGTTATCCGGATTTATTGGGTTTAAAGGGAGCGTAGGCGGAAGCTTAAGTCAGTTGTGAAAGTTT  
GCGGCTCAACCGTAAATTGCAAGTTGATACTGGGTTTCTTGGTGCAGTAGAGGTAGGCGGAATTCGTGGTGTAGCGGTG  
AAATGCTTAGATATCACGAAGAAGCTCCGATTGCGAAGGCAGCTTACTGGACTGTAACCTGACGCTGATGCTCGAAAGTGTG  
GGTAT

>ASV:3010:Family:Ruminococcaceae

TACGTAGGGAGCGAGCGTTGTCCGGAATTACTGGGTGTAAGGGTGCAGTAGGCGGGATGGCAAGTCAGATGTGAAATACC  
GGGGCTTAACCCGGGCTGCATTTGAAACTGTCGTTCTTGGTGAAGTAGAGGCAGGCGGAATTCCTAGTGTAGCGGTG  
AAATGCGTAGATATTAGGAGGAACACCAGTGGCGAAGGCGGCTGCTGGACTGTTACTGACACTGAGGCACGAAAGCGTG  
GGGAG

>ASV:3011:Family:Lachnospiraceae

TACGTAGGGGGCAAGCGTTATCTGGATTTACTGGGTGTAAGGGAGCGTAGACGGAATGGCAAGTCTGATGTGAAAGGCC  
GGGGCTCAACCCGGGACTGCATTTGAAACTGTCGTTCTTGGTGAAGTAGAGGCAGGCGGAATTCCTAGTGTAGCGGTG  
AAATGCGTAGATATTAGGAGGAACACCAGTGGCGAAGGCGGCTTACTGGACGTAACCTGACGTTGAGGCTCGAAAGCGTG  
GGGAG

>ASV:3012:Genus:Anaerofilum

AACGTAGGTGGCAAGCGTTGTCCGGAATTACTGGGTGTAAGGGAGCGCAGGCGGAAGTCAAGTTGGATGTCAAATCTA  
CGGGCTCAACCCGTATACGCATTTCAAAGTGCAGGTTCTTGGTGAAGTAGAGGTCAGAGGTAGGCGGAATTCCTAGTGTAGCGGTG  
AATGCGTAGATATTAGGAGGAACACCAGTGGCGAAGGCGGCTGCTGGGACCAACTGACGCTGAGGCTCGAAAGCATG  
GTAGC

>ASV:3013:Genus:Subdoligranulum

TACGTAGGGTGCAGCGTTGTCCGGAATTACTGGGTGTAAGGGAGCGCAGGCGGACCGGCAAGTTGGAAGTAAAACCTA  
TGGGCTCAACCCATAAATTGCTTTCAAAGTGCAGGCTTGGTGAAGTAGAGGTAGGCGGAATTCCTAGTGTAGCGGTG  
GAATGCGTAGATATTAGGAGGAACACCAGTGGCGAAGGCGGCTTACTGGCTTAACTGACGCTGAAGCACGAAAGCATG  
GGTAG

>ASV:3014:Family:Ruminococcaceae

TACGTAGGTCAAGCGTTGTCCGGAATTACTGGGTGTAAGGGAGCGCAGGCGGGAAGACAAGTTGGAAGTAAAACCTA  
TGGGCTCAACCCATAAAGTGCATTTCAAAGTGCAGGCTTGGTGAAGTAGAGGTAGGCGGAATTCCTAGTGTAGCGGTG  
AAATGCGTAGATATTAGGAGGAACACCAGTGGCGAAGGCGACTTTCTGGACGAAAACCTGACGCTGAGGCGGCAAGCGTG  
GGGAG

>ASV:3015:Genus:Phascolarctobacterium

TACGTAGGTGGCAGCGTTGTCCGGAATTATTGGGCTAAAGAGCATGTAGGCGGCTTAAATAAGTTCGAGCGTAAAATGC  
GGGGCTCAACCCGTATGGCGCTGGAAGTGTAGGCTTGGTGAAGTAGAGGTAGGCGGAATTCCTAGTGTAGCGGTG  
AATGCTTAGATATTGGGAGGAACACCAGTGGCGAAGGCGACTCTGGCGCATAACTGACGCTCAGTCCGAAAGCGTGG  
GGAG

>ASV:3016:Family:Acidaminococcaceae

TACGTAGGTGGCAGCGTTGTCTGGAATTATTGGGCTAAAGAGCATGTAGGCGGCTTAAATAAGTTCGAGCGTAAAATGC  
GGGGCTCAACCCGTATGGCGCTGGAAGTGTAGGCTTGGTGAAGTAGAGGTAGGCGGAATTCCTAGTGTAGCGGTG  
AATGCTTAGATATCACGAAGAAGTCCGATTGCGAAGGCGACTCACTGGACTGCAACTGACACTGATGCTCGAAAGTGTG  
GTATC

>ASV:3017:Family:Ruminococcaceae

TACGTAGGTGGCAAGCGTTGTCCGGAATTACTGGGTGTAAGGGGCGTGCAGCCGGTCTGCAAGTCAGATGTGAAATCCA  
TGGGCTCAACCCATGAAGTGCATTTGAAACTGTTTTCTTGGTGAAGTAGAGGTAGGCGGAATTCCTAGTGTAGCGGTG  
AAATGCTTAGATATGACGCAGAAGTCCGATTGCGAAGGCGACTACCAACTCCGACTGACGCTGAGGCTCGAAAGCGTG  
GGTAT

>ASV:3018:Genus:Butyricicoccus

TACGTAGGGAGCAAGCGTTATCCGGATTTACTGGGTGTAAGGGGCGCGCAGGCGGGCCGGAAGTTGGGAGTAAAATCCC  
GGGGCTTAACCCGGAAGTGCATTTCAAAGTGCAGGCTTGGTGAAGTAGAGGTAGGCGGAATTCCTAGTGTAGCGGTG  
AAATGCGTAGATATACGGAGGAACACCAGTGGCGAAGGCGGCTGCTGGACATTAACCTGACGCTGAGGCGGCAAGCGTG  
GGGAG

>ASV:3019:Family:Carnobacteriaceae

TACGTAGGTGGCAGGCGTTATCCGGATTTATTGGGCTAAAGCGAGCGCAGGCGGTTTATAAGTCTGATGTGAAAGCTT  
TTGGCTTAACCAAAGAAGTGCATCGGAACTGTCAGACTTGGTGAAGTAGAGGTAGGCGGAATTCCTAGTGTAGCGGTG  
AAATGCTTAGATATCACGAAGAAGTCCGATTGCGAAGGCGACTTCTAAAGTGAACCTGACGCTCATGCTCGAAAGTGTG  
GGTAT

>ASV:3020:Genus:Ruminococcaceae\_UCG-010

TACGTAGGTGGCAAGCGTTATCCGGAATTACTGGGTGTAAGGGTGTGAGGCGGGACTGCAAGTCAGATGTGAAATCA  
TGGGCTCAACCCATGACCTGCTGAAACTGTGTTCTTGGTGAAGTAGAGGTAGGCGGAATTCCTAGTGTAGCGGTG  
AAATGCGTAGATATCGGAGGAACACCAGTGGCGAAGGCGATCTACTGGACCAACTGACGCTGAGACACGAAAGCGTG  
GGGAG

>ASV:3021:Family:Lachnospiraceae

TACGTATGGAGCAAGCGTTATCCGATTTACTGGGTGTAAGGGAGCGTAGACGGCACGGCAAGCCAGATGTGAAAGCCC  
GGGGCTCAACCCGGGACTGCATTTGAAACTGCTGAGCTAGAGTGTGCGAGAGGCAAGTGAATTCCTAGTGTAGCGGTG  
AAATGCTTAGATATCACGAAGAAGTCCGATTGCGAAGGCGACTGCTAAGCTGCAACTGACATTGAGGCTCGAAAGTGTG  
GGTAT

>ASV:3022:Class:Bacteroidia  
TACGGAGGATCCGAGCGTTATCCGGATTTATTGGGTTTAAAGGGAGCGTAGGCGGACGCTTAAGTCAGTTGTGAAAAGTTT  
GCGGCTCAACCGTAAATTGCAGTTGATACTGGGTGTCTTGAGTACAGTAGAGGCAGACGGAATTCCTAGTGTAGCGGTG  
AAATGCGTAGATATTAGGAGGAACACCACTGGCGAAGGCGGTCTGCTGGACAGCAACTGACGCTGAGGCGCAAAGCGTG  
GGGAG

>ASV:3023:Species:assamensis/palustris  
TACGTAGGGCGCAAGCGTTGTCCGGAATTATTGGGCGTAAAGAGCTCGTAGGCGGTTTGTGCGCTCTGCTGTGAAAGCCC  
GGGGCTTAACCCGGGTGTGAGTGGGTACGGGCAGACTAGAGTGGAGGAGACTGGAATTCCTGGTGTAGCGGTG  
GAATGCGCAGATATCAGGAGGAACACCACTGGCGAAGGCAAGTCTCTGGGCTGTTACTGACGCTGAGGAGCGAAAGCATG  
GGGAG

>ASV:3024:Family:Prevotellaceae  
TACGTAGGGGGCAAGCGTTATCCGGATTTATTGGGTTTAAAGGGAGCGTAGGCCGCCCTTAAGCGTGTGTGAAATGCC  
GCGGCTCAACCGTGGCACTGCAGCGCAACTGGGGGCTTGGTGCACGCAACGCAGCGGAATTCCTGGTGTAGCGGTG  
AAATGCTTAGATATTAGGAGGAACATCAGTGGCGAAGGCGGCTTACTGGACTGAAACTGACACTGAGGCACGAAAGCGTG  
GGGAG

>ASV:3025:Family:Bifidobacteriaceae  
TACGTAGGGTGCAAGCGTTATCCGGAATTATTGGGCGTAAAGGGCTCGTAGGCGGTTCTGTCGCTCCGGTGTGAAAGTCC  
ATCGCTTAACCGTGGACTCGCGCCGGGTACGGGCGGCTTGGTGCAGCAACGCAGCGGAATTCCTGGTGTAGCGGTG  
GAATGTGTAGATATCACGAAGAACTCCGATTGCGAAGGCAGCTGCTAAGCTGCAACTGACATTGAGGCTCGAAGGTGTG  
GGTAT

>ASV:3026:Genus:Flavonifractor  
TACGTATGGTGCAAGCGTTATCCGGATTTACTGGGTGTAAGGGCGTGTAGGCGGATTGCAAGTCAGATGTGAAAAGTCC  
GGGGCTCAACCTCCAGCTGCATTTGAACTGTAGTTCTTGAGTGCAGGAGGCAATCGGAATTCCTGGTGTAGCGGTG  
GAATGCGTAGATATCGGAGGAACACCACTGGCGAAGGCGGCTTACTGGGCACCAACTGACGCTGAGGCTCGAAAGGTGTG  
GGTAG

>ASV:3027:Genus:Sutterella  
TACGTAGGGTGCGAGCGTTAATCCGGAATTACTGGGCGTAAAGCGTGCAGGCGGTTGGTAAGACAGATGTGAAATCCC  
CGGGCTTAACCTGGAACTGCATTTGACTGTCCGACTGGAGTGCCTCAGAGGGGGTGAATTCACGCTGTAGCAGTG  
AAATGCGTAGATATGTGAAGAACACCGATGGCGAAGGCAGCCCCCTGGGACCAACTGACGCTCATGCACGAAAGCGTG  
GGGAG

>ASV:3028:Genus:Caproiciproducens  
TACATAGGGAGCAAGCGTTGTCCGGATTTACTGGGTGTAAGGGTGCCTAGGCGGCCGAGCAAGTCAGATGTGAAATGTA  
TGGGCTCAACCCATAGACTGCATTTGAACTGTTTGGCTTGGTGAAGTAGAGGCAGGCGGAATTCCTGGTGTAGCGGTG  
AAATGCGTAGAGATCGGAGGAACACCACTGGCGAAGGCGGCTGCTGGGCTTAACTGACGCTGAGGCACGAAAGCGTG  
GGTAG

>ASV:3029:Genus:Ruminiclostridium\_9  
TACGTAGGTGGCAAGCGTTATCCGGATTTACTGGGTGTAAGGGCGTGTAGGCGGGATTGCAAGTCAGATGTGAAAAGTCC  
GAGGCTCAACCTCCAGCCTGCATTTGAACTGTAGTTCTTGAGTACTGGAGAGGCAGACGGAATTCCTAGTGTAGCGGTG  
AAATGCGTAGATATTAGGAGGAACACCACTGGCGAAGGCGGTCTGCTGGACAGCAACTGACGCTGAGGCGCAAAGCGTG  
GGGAG

>ASV:3030:Genus:Ruminococcaceae\_UCG-013  
TACGTAGGTGCAAGCGTTGTCCGGATTTACTGGGTGTAAGGGCGCTAGGCGGACTGTCAAGTCAGTCGTGAAATACC  
GGGGCTTAACCCGGGCTGCGATTGAACTGACAGCCTTGGTATCGGAGAGGGAAGCGGAATTCCTAGTGTAGCGGTG  
AAATGCGTAGATATTAGGAGGAACACCACTGGCGAAGGCGGCTTCTGGACGACAACGACGCTGAGGCGCAAAGGTGTG  
GGGAG

>ASV:3031:Family:Lachnospiraceae  
TACGTAGGGGGCAAGCGTTATCCGGATTTACTGGGTGTAAGGGAGCGTAGGCGGTTGGAAGCCAGAAGTAAAAGCCC  
GGGGCTTAACCCGGGACTGCTTTTGAAGTGTAGACTAGAGTGTGCGGAGAGGTAAGTGAATTCCTGGTGTAGCGGTG  
AAATGCGTAGATATTAGGAGGAACACCACTGGCGAAGGCGGCTTACTGGACGATAACTGACGCTGAGGCTCGAAAGCGTG  
GGGAG

>ASV:3032:Species:alpina/echinoides/mali/oligophenolica/panacis/rhizogenes/sanxanigenens  
TACGGAGGGAGCTAGCGTTATTCGGAATTACTGGGCGTAAAGCGCACGTAGGCGGCTTTGTAAGTTAGAGGTGAAAGCCT  
GGAGCTCAACTCCAGAATTGCCTTTAAGACTGCATCGCTTGAATCCAGGAGAGGTGAGTGAATTCGAGTGTAGAGGTG  
AAATTCGTAGATATTCGGAAGAACACCACTGGCGAAGGCGGCTCACTGGACTGGTATTGACGCTGAGGTGCGAAAGCGTG  
GGGAG

>ASV:3033:Species:aerolatum  
TACGAAAGGGGCTAGCGTTGTCCGGAATCACTGGGCGTAAAGGGCGCTAGGCGGCTTTTAAAGTTGGGGGTGAAAGCCT  
GTGGCTCAACCCAGAATTGCCTTCGATACTGGGACGCTTGGTGTGGTAGAGGTTGGTGAAGTGCAGTGTAGAGGTG  
AAATTCGTAGATATTCGAAAGAACACCGTGGCGAAGGCGGCAACTGGACCATCACTGACGCTGAGGCGCAAAGCGTG  
GGGAG

>ASV:3034:Genus:Oscillospira  
TACGTAGGTGGCAAGCGTTGTCCGGATTTACTGGGTGTAAGGGCGTGTAGCCGGGAGACAAGTCAGATGTGAAATCTG  
GAGGCTCAACCTCCAACTGCATTTGAACTGTTTCTTGGTGTAGAGGTAATCGGAATTCCTAGTGTAGCGGTG  
AAATGCGTAGATATTAGGAGGAACACCACTGGCGAAGGCGGATTACTGGACGACAACGACGCTGAGGCGCAAAGCGTG  
GGGAG

>ASV:3035:Phylum:Proteobacteria  
TACGGAGGGTGCAAGCGTTAATCCGGAATTACTGGGCGTAAAGCGCGCTAGGTTGTTTTGTAAGTCAGAGGTGTAATCCC  
ACGGCTTAACCGTGAAGTGCCTTTGATACTGCATAACTTGGATCCGGGAGAGGACAGCGGAATTCCTGGTGTAGCGGTG



GAATGCGTAGATATCGGGAGAACACCAGTGGCGAAGGCGGCTACTGGCACCAACTGACGCTGAGGCTCGAAAGTGTG  
GGTAG  
>ASV:3036:Family:Bifidobacteriaceae  
TACGGAGGGTGC AAGCGTTATCCGGAATTATTGGGCGTAAAGGGCTCGTAGGCGGTTCTGCGCTCCGGTGTGAAAGTCC  
ATCGCTTAACGGTGGATCTGCGCCGGGTACGGGCGGCTGGAGTGCAGTGGGGAGACTGGAATCCCGGTGTACGGTG  
GAATGTGTAGATATTAGGAGGAACATCAGTGGCGAAGGCGGCTTACTGGACTGAAACTGACACTGAGGCACGAAAGCGTG  
GGGAG  
>ASV:3037:Order:Clostridiales  
TACGTAGGGGGCGAGCGTTATCCGGAATTACTGGGTGTAAGGGTGCAGTGGCGCAACGTAAGTCTGTTGTGAAAGGTG  
ATGGCTTAACCATCGAAGTGAATGGAAGTGCAGGCTAGAGTGCAGGAGAGGAAAGCGGAATTCCTAGTGTAGCGGTG  
AAATGCGTAGATATTAGGAAGAACCAGTGGCGAAGGCGGCTTCTGGACTGCAACTGACGCTGAGGCACGAAAGCGTG  
GGGAG  
>ASV:3038:Genus:Phascolarctobacterium  
TACGTAGGTGGCGAGCGTTGTCCGGAATTATTGGGCGTAAAGAGCATGTAGGCGGCTTAATAAGTGCAGCGTGAAATGC  
GGGGCACAACCCGATGGCGTGGAACTGTAGGCTTGTAGTGCAGGAGAGGAAAGGGGAATTCAGTGTAGCGGTGA  
AATGCGTAGATATTGGGAGGAACACCAGTGGCGAAGGCGGCTTCTGGACGCAACTGACGCTGAGGCGCGAAAGCCAGG  
GGAGC  
>ASV:3039:Family:Lachnospiraceae  
TACGTAGGGGGCAAGCGTTATCCGGAATTACTGGGTGTAAGGGAGCGTAGGTGGCAAGGCAAGTCAAGTGTGAAACCC  
GGGGCTCAACCCGGGACTGCATTTGAACTGTCTAGCTAGAGTGCAGGAAAGGTAAGTGGAAATTCCTAGTGTAGCGGTG  
AAATGCATAGATATTAGGAGGAACACCAGTGGCGAAGGCGGCTTACTGGACTGTAAGTGCAGCTGAGGCTCGAAAGCGTG  
GGGAG  
>ASV:3040:Family:Lachnospiraceae  
TACGTAGGGGGCAAGCGTTATCCGGAATTACTGGGTGTAAGGGAGCGTAGAGCGATTAGCAAGTCTGATGTGAAAGGCA  
GGGGCTCAACCCCGGACTGCATTTGAAACTGCCAGTCTTGTAGTGCAGGAGGTAAGCGGAATTCCTAGTGTAGCGGTG  
AAATGCTTAGATATCACGAAGAACCAGTGGCGAAGGCGAGCTGCTAAGTGCAGTGCAGCTGAGGCTCGAAAGTGTG  
GGTAT  
>ASV:3041:Species:fibrivorans/fontiphilus/mixtus/ostraviensis  
TACGGAGGGTGC AAGCGTTAATCCGGAATTACTGGGCGTAAAGCGCACGTAGGTGGTTTGTAAAGTCTAGTGTGAAATCC  
CGGGCTCAACCTGGGACTGCAGTTAGAAGTGGCAAGCTAGAGTGGGTAGAGGGGTGTGGAATTCAGGTGTAGCGGTG  
AAATGCGTAGATATCTGGAGGAACATCAGTGGCGAAGGCGACACCCTGGACTCATACTGACACTGAGGTGCGAAAGCGTG  
GGGAG  
>ASV:3042:Genus:Bacteroides  
TACGGAGGATCCGAGCGTTATCCGGAATTATTGGGTTAAAGGGAGCGTAGGCGGATTGTTAAGTCAAGTGTGAAAGTTT  
GCGGCTCAACCGTAAATCGCAGTTGATACTGCCAGTCTTGTAGTGCAGTAGAGGTGGCGGAATTCCTGGTGTAGCGGTG  
AAATGCTTAGATATCACGAAGAACCAGTGGCGAAGGCGAGCTCACTGGAGTGAAGTGCAGCTGATGCTCGAAAGTGTG  
GGTAT  
>ASV:3043:Family:Peptococcaceae  
TACGTAGGGAGCAAGCGTTGTCCGGAATTACTGGGCGTAAAGGGCGCGTAGGCGGACGGATAAGTCAAGTGTGAAATCTC  
CGGGCTCAACCTGGAGCGTGCATTTGAAACTGTCTGTCTTGGAGGCGAGGAGGAAAGTGGAAATTCCTAGTGTAGCGGTG  
AAATGCGTAGATATTAGGAGGAACACCAGTGGCGAAGGCGACTTCTGGACTGAACTGACGCTGAGGCGCGAAAGCATG  
GGGAG  
>ASV:3044:Genus:Tyzzerella\_3  
TACGTAGGGAGCAAGCGTTGTCCGGAATTACTGGGTGTAAGGGTGCAGTGGCGGATGCAAGTCAATGTGAAATACC  
GGGGCTCAACTCCGGGCTGCATAAGAACTGTATATCTTGTAGTACAGGAGAGGTAAGCGGAATTCCTAATGTAGCGGTG  
AAATGCGTAGATATTAGGAGGAACACCAGTGGCGAAGGCGGCTTACTGGACTGAAACTGACGCTGAGGCACGAAAGCGTG  
GGGAG  
>ASV:3045:Genus:Coproccoccus\_2  
TACGTATGGTGCAGGCGTTATCCGGAATTACTGGGTGTAAGGGTGCAGTGGCGCAAGGCAAGTCTGAAGTGTGAAATCC  
GGGGCTCAACCCGGAAGTGTCTTTGAAACTGTTAGCTGGAGTACAGGAGAGGTAAGTGGAAATTCCTAGTGTAGCGGTG  
AAATGCGTAGATATTAGGAGGAACACCAGTGGCGAAGGCGACTTACTGGCACCAACTGACGCTGAGGCTCGAAAGCATG  
GGTAG  
>ASV:3046:Order:Gastraerophilales  
TACGGAGGGTGCAGGCGTTGTCCGGAATCATTGGGCGTAAAGAGTTCGTAGGTGGCCTGTTAAGTCTGGTGTAAATGCA  
GATGCTCAACATCTGTTCCGCACTGGATACTGGCAAGCTTGAATGCGGTAGAGGTAAGGGAATTCCTGGTGTAGCGGTG  
AAATGCGTAGATATCAGGAGGAACATCGTGGCGTAAGCGCTTACTGGGCCGTAATTGACACTGAGGAACGAAAGCCAG  
GGTAG  
>ASV:3047:Genus:Ruminiclostridium\_9  
TACGTAGGGAGCAAGCGTTATCCGGAATTACTGGGTGTAAGGGCGTGTAGGCGGGATTGTAAGTCAAGTGTGAAACCA  
GGGGCTCAACCTCTGGCCTGCATTTGAAACTGCAGTCTTGTAGTACTGGAGAGGCGAGACGGAATTCCTAGTGTAGCGGTG  
AAATGCGTAGATATTAGGAGGAACACCAGTGGCGAAGGCGGCTGCTGGACAGCAACTGACGCTGAGGCGCGAAAGCGTG  
GGGAG  
>ASV:3048:Family:Christensenellaceae  
TACGTAGGGAGCGAGCGTTGTCCGGAATTACTGGGCGTAAAGGGTGCAGTGGCGGCTGGTAAGTCAAGTGTGAAATACC  
CGTGCTCAACATGGGGGTGCATCTGATACTGTTAGGCTTGTAGTGCAGGAGAGGAAAGCGGAATTCCTAGTGTAGCGGTG  
AAATGCGTAGATATTAGGAGGAACACCAGTGGCGAAGGCGACTTCTGGACAGTAACTGACGCTGAGGCACGAAAGTGTG  
GGGAG  
>ASV:3049:Genus:Family\_XIII\_AD3011\_group

TACGTAGGGGGCAAGCGTTATCCGGAATTATTGGGCGTAAAGAGTGCAGGTGGTAACTTAAGCGCGGGTTAAGGCA  
ATGGCTTAACCAATTGTTCCGCCGCGAACTGGGATACTTGAGTGCAGGAGAGGAAAGCGGAATTCCTAGTGTAGCGGTGA  
AATGCGTAGATATTAGGAGGAACACCAAGTGGCGAAGGCGGCTTCTGGACTGAACTGACACTGAGGCACGAAAGTGTGG  
GGAGC  
>ASV:3050:Family:Ruminococcaceae  
TACGTAGGTGGCAAGCGTTGTCCGGATTTACTGGGTGTAAGGGCGTGTAGCCGGGAAGGCAAGTCAGATGTGAAATCCA  
CGGGCTCAACTCGTGAAGTGCATTTGAAACTGTTTTCTTGGAGTATCGGAGAGGCAATCGGAATTCCTAGTGTAGCGGTG  
AATGCTTAGAGATCATACAGAACACCGATTGCGAAGGCAGCTTACCAAATATGACTGACGTTGAGGCACGAAAGTGTG  
GGTAT  
>ASV:3051:Genus:Fusicatenibacter  
TACGTAGGGGGCAAGCGTTATCCGGATTTACTGGGTGTAAGGGAGCGTAGACGGCAAGTCTGATGTGAAAACCCAGGGC  
TTAACCTGGGACTGCATTGAAACTGTCTGGCTCGAGTGCCGGAGAGGTAAGCGGAATTCCTAGTGTAGCGGTGAAATG  
CGTAGATATCACGAAGAACTCCGATTGCGAAGGCAGCTGCTAAGCTGCAACTGACATTGAGGCTCGAAAGTGTGGTAT  
CAAAC  
>ASV:3052:Family:Flavobacteriaceae  
TACGGAGGATCCAAGCGTTATCCGGAATCATTGGGTTAAAGGGTCCGTAGGCGGAACAATAAGTCAGCGGTGAAAGTTC  
GTGGCTCAACCACGAAATGCCATTGAAACTGTTGTTATTGAGTCATTATGAAGTGGTTAGAATATGTAGTGTAGCGGTG  
AAATGCATAGATATTACATAGAATACCGATTGCGAAGGCAGATCACTAATAATGTACTGACGCTGATGGACGAAAGCGTA  
GGTAG  
>ASV:3053:Class:Bacteroidia  
TACGGAGGATCCGAGCGTTATCCGGATTTATTGGGTTAAAGGGTGCCTAGGCGGTTTAGTAAGTCAGCGGTGAAATTTT  
GGTGCTTAACACCAAACGTGCCGTTGATACTGCTGGCTAGAGAGTAGTTGCCGTAGGCGGAATTCCTAGTGTAGCGGTG  
AAATGCTTAGATATCGGGAGGAACACCAAGTGGCGAAGGCGGCTACTGGGCACCAACTGACGCTGAGGCTCGAAAGTGTG  
GGTAG  
>ASV:3054:Genus:Streptococcus  
TACGGAGGATCCGAGCGTTATCCGGATTTATTGGGCGTAAAGCGAGCGCAGGCGGTTAGATAAGTCTGAAGTTAAAGGCT  
GTGGCTTAACCATAGTACGCTTTGGAACTGTTAACTTGAGTGAAGAGGGGAGAGTGAATTCATGTGTAGCGGTGA  
AATGCGTAGATATATGGAGGAACACCGGTGGCGAAAGCGGCTCTCTGGTCTGTAAGTACGCTGAGGCTCGAAAGCGTGG  
GGAGC  
>ASV:3055:Genus:Bilophila  
TACGGAGGTTGCAAGCGTTAATCGGAATCACTGGGCGTAAAGCGCACGTAGGCGGCTGGTAAGTCAGGGGTGAAATCCC  
ACAGCCCAACTGTGGAAGTCCCTTGATACTGCCCGCTTGAGTACCAGGAGAGGGTGGCGGAATTCAGGTGTAGGAGTG  
AAATCCGTAGATATCTGGAGGAACACCGGTGGCGAAGGCGGCCACTGGACGGTAAGTACGCTGAGGTGCGAAAGCGTGG  
GGTAG  
>ASV:3056:Family:Clostridiales\_vadinBB60\_group  
TACGTAGGGGGCGAGCGTTGTCCGGAATGACTGGGCGTAAAGGGTGTGTAGGTGGTTGATAAGTTAGATGTGTAATACC  
CAGGGCTTAACCTCGGTTGCTGCAATCAAAGTGTGACTTGGAGTGGAGAGGATAGTGAATTCCTAGTGTAGCGGTG  
GGAATGCGTAGATATTAGGAGGAACATCAGTGGCGAAGGCGACTATCTGGACAGCAACTGACACTGAGGCACGAAAGCGT  
GGGA  
>ASV:3057:Genus:Prevotella  
TACGGAAGGTTTGGGCGTTATCCGGATTTATTGGGTTAAAGGGAGCGTAGGCGGTTTGGTAAGCGTGTGTGAAATGTA  
GGAGCTCAACTTCTAGATTGCAGCGCAACTGTGAGACTTGAGTGCACACAACGTAGGCGGAATTCATGGTATAGCGGTG  
AAATGCTTAGATATCATGAAGAACTCCGATTGCGAAGGCAGCTTACGGGAGCGCAACTGACGCTGAAGCTCGAAGGTGCG  
GGTAT  
>ASV:3058:Genus:Oscillibacter  
TACGTAGGTGGCAAGCGTTGTCCGGATTTACTGGGTGTAAGGGCGTGCAGCCGGAGAGACAAGTCAGATGTGAAATCCG  
CAGGCTCAACTCGCAACTGATTTGAAACTGTTTCCCTTGGAGTATCGGAGAGGTGATCGGAATTCCTAGTGTAGCGGTG  
AAATGCGTAGATATTAGGAGGAACACCAAGTGGCGAAGGCGGATGACTGGACGACAAGTACGCTGAGGCGCAAGGCGTGG  
GGAG  
>ASV:3059:Family:Clostridiaceae\_2  
TACGGAGGATCCGAGCGTTATCCGGATTTATTGGGTTAAAGGGAGCGTAGGCGGACGCTTAAAGTCAGTTGTGAAAGGCT  
ACGGCTCAACCGTAGTAAGCCTTTGAAACTGGGAAACTTGGAGTGCAGGAGAGGAGAGTGAATTCCTAGTGTAGCGGTGA  
AATGCGTAGATATTAGGAGGAACACCAAGTGGCGAAGGCGACCTACTGGGCACCAACTGACGCTGAGGCTCGAAAGCATGG  
GTAGC  
>ASV:3060:Genus:Bacteroides  
TACGGAGGATCCGAGCGTTATCCGGATTTATTGGGTTAAAGGGAGCGTAGGTGGATTGTTAAGTCAGTTGTGAAAGTGT  
GTGGCTCAACCATAAAATTGCGTTGAAACTGGGTTACTTGGAGTGTGTTTGGAGTAGGCGGAATGCGTGGTGTAGCGGTG  
AAATGCTTAGATATCACGAAGAACTCCGATTGCGAAGGCAGCTACTGGACTGCAACTGACACTGATGCTCGAAAGTGTG  
GGTAT  
>ASV:3061:Kingdom:Bacteria  
TACGTAGGGAGCGAGCGTTGTCCGGATTTACTGGGTGTAAGGGTGCCTAGGCGGATTGGCAAGTCAGAAGTGAATCCA  
TGGGCTTATCCCATGAACTGCTTTTGAAGTGTAACTTCTTGGAGTGAAGTAGAGGTAGGCGGAATTCGTGGTGTAGCGGTG  
AAATGCTTAGATATCACGAAGAACTCCGATTGCGAAGGCAGCTACTGGACTGCAACTGACACTGATGCTCGAAAGTGTG  
GGTAT  
>ASV:3062:Family:Ruminococcaceae  
TACGTAGGGAGCGAGCGTTGTCCGGATTTACTGGGTGTAAGGGTGCCTAGGCGGTTGCAAGTCAGGCGTGAATCCC  
GCGGCTCAACTGCGGGCTGCGCTTGAAGTGTAGATCTTGGAGTGAAGTAGAGGCAAGCGGAATTCCTAGTGTAGCGGTG  
AAATGCGTAGATATTAGGAGGAACACCAAGTGGCGAAGGCGGCTTCTGGGCTTAACTGACGCTGAGGCACGAAAGCGTGG

GGGAG

>ASV:3063:Genus:Ruminococcaceae\_UCG-002

TACGTAGGTGGCAAGCGTTGTCCGGATTTACTGGGTGTAAGGGCGGTAGCCGGGAAGACAAGTCAGATGTGAAATACA  
TGGGCTCAACCCATGAAGTGCATTTGAACTGATTTCTTGAGTATCGGAGAGGCAATCGGAATTCCTAGTGTAGCGGTG  
AAATGCGTAGATATTAGGAGGAACACCAGTGGCGAAGGCGGATTGCTGGACGACAACGACGGTGAGGCGCAAAGCGTG  
GGGAG

>ASV:3064:Genus:Bacteroides

TACGGAGGATCCGAGCGTTATCCGGATTTATTGGGTTTAAAGGGAGCGTAGATGGATGTTTAAAGTCAGTTGTGAAAGTTT  
GCGGCTCAACCGTAAAATTGCAGTTGATACTGGATATCTTGAGTGCAGTTGAGGCAGGCGGAATTCGTGGTGTAGCGGTG  
AAATGCTTAGATATCACGAAGAACCCCGATTGCGAAGGCAGCCGCTGTGGCCCACTGACGCTGAGGCTCGAAGGTGCG  
GGTAT

>ASV:3065:Genus:Ruminiclostridium

TACGTAGGGAGCGAGCGTTGTCCGGATTTACTGGGTGTAAGGGCGGTAGGCGGGATTACAAGTCAGTGTGAAATTC  
GGGGCTCAACCCGGAAGTGCATTTGAACTGATTTCTTGAGTACTGGAGAGGCGAGGCGGAATTCCTAGTGTAGCGGTG  
AAATGCGTAGATATTAGGAGGAACACCAGTGGCGAAGGCGGCTGCTGGACGACAACGACGCTGAGGCGCAAAGCGTG  
GGGAG

>ASV:3066:Species:asaccharolytica

TACGTAGGTGGCAAGCGTTGTCCGGAATTTAGGCGTAAAGCGCGCAGGTGGTTTAAAGTCTGATGTGAAAGCCC  
ACGGCTCAACCGTGGAGGGTATTGAACTAATAAAGTGCAGGAGAGAAAAGTGAATTCCTAGTGTAGCGGTG  
AAATGCGTAGAGATTAGGAGGAACACCAGTGGCGAAGGCGGCTTTTGGCCTGCAACTGACACTGAGGCGCAAAGCGTG  
GGGAG

>ASV:3067:Order:Bacteroidales

TACGGGGATGCGAGCGTTATCCGGATTTATTGGGTTTAAAGGGTGCAGTGGCGGCTTTTAAAGTCAGCGGTGAAAGTCT  
GTGGCTCAACCATAGAATTGCCGTTGAACTGGGGGCTTGGATGTTTGGAGGCGGGAATGCGTGGTGTAGCGGTG  
AAATGCGTAGATATTAGGAGGAACACCAGTGGCGAAGGCGGCTTACTGGACGTAACGACGTTGAGGCTCGAAAGCGTG  
GGGAG

>ASV:3068:Family:Lachnospiraceae

TACGTATGGTGGCAAGCGTTATCCGGATTTACTGGGTGTAAGGGAGCGTAGACGGAGAGGCAAGTCTGAAGTAAAGCCC  
GGGGCTCAACCCGGGACTGCTTTGAACTGCAGTTCTAGAGTCCGGAGAGGTAAGCGGAATTCAGTGTAGCGGTG  
AAATGCTTAGATATCACGAAGAACCCGATTGCGAAGGCAGCTTCTGGACTGTAACGACGCTGATGCTCGAAAGTGTG  
GGTAT

>ASV:3069:Genus:GCA-900066755

TACGTATGGAGCAAGCGTTATCCGGATTTACTGGGTGTAAGGGAGCGTAGACGGTTATGCAAGTCCGATGTGAAAGCCC  
GGGGCTTAACCCGGGACTGCATTAGAACTGTGTAAGTGCAGGAGGTAAGTGAATTCCTAGTGTAGCGGTG  
AAATGCGTAGATATTAGGAGGAACACCAGTGGCGAAGGCAGCTTCTGGACTGTAACGACGCTGATGCTCGAAAGTGTG  
GGTAT

>ASV:3070:Family:Prevotellaceae

TACGGAAGGTCCGGGCTTATCCGGATTTATTGGGTTTAAAGGGAGCGTAGGCGGAGATTAAGCGTGTGTAAGTGA  
GACGCTCAACGCTGCACTGCAGCGCAACTGGTTTCTTGAGTACGCGCAAAGTGGCGGAATTCGTGGTGTAGCGGTG  
AAATGCGTAGATATATTGGAGGAACACCAGTGGCGAAGGCAGCGTCTGGGCCCAACTGACGCTCATTCCCGAAAGCGTG  
GGGAG

>ASV:3071:Class:Bacteroidia

TACGGAGGATCAAGCGTTATCCGGATTTATTGGGTTTAAAGGGTGCAGTGGCGGTTTGTAGTAAAGTCAGCGGTGAAATTT  
GGTGCTTAACACCAAACGTTGCCGTTGATACTGCTGGCTAGAGAGTAGTCCGGTAGGCGGAATGTATGGTGTAGCGGTG  
AAATGCTTAGATATCACGAAGAACCCGATTGCGAAGGCAGCTACTAGACTGCTACTGACACTGATGCTCGAAAGTGTG  
GGTAT

>ASV:3072:Species:lingnae

TACGTAGGTGCGAGCGTTGTCCGGAATTTAGGCGTAAAGGGCTTGTAGGCGGTTTGTCCGCTGCGGTGAAATCCT  
CTGGCTTAACCTGGGGCGTGCAGTGGGTACGGGCAGACTTGCAGTGCAGTGGGGAGACTGGAATTCCTGGTGTAGCGGTG  
GAATGCGCAGATATCAGGAAGAACACCAGTGGCGAAGGCGGCTTCTGGGCCGTTACTGACGCTGAGGAGCGAAAGCGTG  
GGGAG

>ASV:3073:Genus:Family\_XIII\_AD3011\_group

TACGTAGGGGGCAAGCGTTATCCGGATTTATTGGGCGTAAAGAGTGCAGTGGTAACTTAAGCGCGGGGTTTAAAGGCA  
ATGGCTTAACCATTTGTCGCCCTGCGAAGTGGGTTACTTGCAGTGCAGGAGAGGAAAGCGGAATTCCTAGTGTAGCGGTG  
AATGCGTAGATATTAGGAGGAACACCAGTGGCGAAGGCGGCTTCTGGACTGAAACTGACACTGAGGACGAAAGTGTG  
GGAG

>ASV:3074:Genus:Negativibacillus

TACGTAGGTGGCGAGCGTTATCCGGATTTACTGGGTGTAAGGGAGCGTAGGCGGGAGGCAAGTTGAATGTCTAAACTA  
TCGGCTCAACTGATAGTCCGTTCAAACCTGCAACTCTTGAGTGCAGTGGAGTGGGCGGAATTCGTGGTGTAGCGGTG  
AATGCTTAGATATCACGAAGAACCCGATTGCGAAGGCAGCTTACTAACCTGTAAGTGCATTTGATGCTCGAAAGTGTG  
GTATC

>ASV:3075:Genus:Shuttleworthia

TACGTATGGAGCAAGCGTTATCCGGATTTACTGGGTGTAAGGGAGCGTAGGCGGTGCTATAAGTCTGATGTGAAAGCCC  
GGGGCTCAACCGCGGACTGCATTGAAACTGTAGGACTGGAGTGTGCGAGGGGTAAGTGAATTCCTAGTGTAGCGGTG  
AAATGCGTAGATATTAGGAGGAACACCAGTGGCGAAGGCGGCTTACTGGACGATAACTGACGCTGAGGCTCGAAAGCGTG  
GGGAG

>ASV:3076:Genus:Agathobacter

TACGTATGGTGGCAAGCGTTATCCGGATTTACTGGGTGTAAGGGAGCGAGGCGGTGCGGCAAGTCTGATGTGAAAGCCC

GGGGCTCAACCCGGTACTACATTGAAACTGTCGTAAGTGTGCGGAGGGTAAGTGAATTCCTAGTGTAGCGGTG  
AAATGCGTAGATATTAGGAGGAACGCCAGTGGCGAAGGCGGCTTACTGGACGATAACTGACGCTGAGGCTCGAAAGCGTG  
GGGAG  
>ASV:3077:Genus:Pseudomonas  
TACGAAGGGTGAAGCGTTAATCGGAATTACTGGGCGTAAAGCGCGGTAGGTGGTTCGTTAAGTTGGATGTGAAAGCCC  
CGGGCTCAACCTGGGAAGTGCATCCAAAAGTGGCGAGCTAGAGTACGGTAGAGGGTGGTGAATTCCTGTGTAGCGGTG  
AAATGCGTAGATATAGGAAGAACACCAGTGGCGAAGGCGGCCACTGGACTGATACTGACACTGAGGTGCGAAAGCGTG  
GGGAG  
>ASV:3078:Order:Rhodospirillales  
TACGGAGGATCCGAGCGTTGTTCCGAATTACTGGGCGTAAAGGGTGTGTAGGCGGTTAAGTAAGATAGTGGTGAATGCC  
GGGGCTCAACCTCGGAATTGCATTATGACTATTTAGCTAGAATGATGCAGAGGATAGCGGAATACCCAGTGTAGAGGTG  
AAATTCGTAGATATTAGGAGGAACACCAGTGGCGAAGGCGGCTGCTGGACTGTTACTGACACTGAGGCACGAAAGCGTG  
GGGAG  
>ASV:3079:Family:Lachnospiraceae  
TACGTATGGTGAAGCGTTATCCGGATTTACTGGGTGTTAAGGGAGCGAGGCGGTACGGCAAGTCTGATGTGAAAGCCC  
GGGGCTCAACCCGGTACTGCATTGGAAGTGTGCGACTAGAGTGTGCGGAGGGTAAGTGAATTCCTAGTGTAGCGGTG  
AAATGCTTAGATATCACGAAGAACTCCGATTGCGAAGGCAGCCTGCTAAGCTGCAACTGACATTGAGGCTCGAAAGTGTG  
GGTAG  
>ASV:3080:Genus:Christensenellaceae\_R-7\_group  
TACGTAGGGGCGAGCGTTGTCCGGAATGATTGGGCGTAAAGGGCGGTAGGCGGCCTGATAAGTCTGGAGTAAAAGTCC  
CGTTTCAAGGTGGGAATGGCTTTGGATACTGTGCGGCTTGTAGTGCAGGAGAGGAAAGCGGAATACCGGTGTAGCGGTG  
AAATGCGTAGAGATCGGTAGGAACACCAGTGGCGAAGGCGGCTTCTGGACTGAAACTGACGCTGAGGCGCGAAAGCGTG  
GGGAG  
>ASV:3081:Genus:Intestinimonas  
TACGTAGGTGGCAAGCGTTATCCGGATTTACTGGGTGTTAAGGGCGGTAGGCGGGAAGGCAAGTCCAGTGTGAAAACCTA  
TGGGCTCAACTCATAGCCTGCATTTGAAACTGTTTTCTTGTAGTGTGAGAGGCAATCGGAATTCCTGTGTAGCGGTG  
AAATGCGTAGATATACGGAGGAACACCAGTGGCGAAGGCGGATTGCTGGACAGTAACGACGTTGAGGCACGAAAGTGTG  
GGGAG  
>ASV:3082:Family:Lachnospiraceae  
TACGTAGGGGCGAAGCGTTATCCGGATTTACTGGGTGTTAAGGGAGCGCAGGCGGCATGATAAGTCTGATGTGAAAACCC  
AAGGCTCAACCATGGGACTGCATTGGAAGTGTGCTGTAGAGTGTGCGGAGAGGTAAGCGGAATTCCTAGTGTAGCGGTG  
AAATGCGTAGATATTAGGAGGAACACCAGTGGCGAAGGCGACTTCTGGACAGTAACGACGTTGAGGCACGAAAGTGTG  
GGGAG  
>ASV:3083:Species:faecalis/pulmonis  
TACAGAGGGTGAAGCGTTAATCGGAATTACTGGGCGTAAAGCGAGCGTAGGTGGCTTATAAGTCCAGTGTGAAAAGCCC  
CGGGCTTAACCTGGGAACCGCATCTGATACTGTTAGGCTAGAGTAGGTGAGAGGAAGGTAGAATTCAGGTGTAGCGGTG  
AAATGCGTAGAGATCTGGAGGAATACCGATGGCGAAGGCGAGCCTTCTGGCATCATACTGACACTGAGGTTGAAAGCGTG  
GGTAG  
>ASV:3084:Genus:Dialister  
TACGTAGGTGGCAAGCGTTGTCCGGAATTTATTGGGCGTAAAGCGCGCAGGCGGCTTCCCAAGTCCCTTTAAAAGTGC  
GGGGCTTAACCCGTGATGGGAAGGAACTGGGAAGTGGAGTATCGGAGAGGAAAGTGAATTCCTAGTGTAGCGGTG  
AAATGCTAAAGATTAGGAAGAACACCAGTGGCGGAGGCGGCTACTGGGCACCAACTGACGCTGAGGCTCGAAAGTGTG  
GTAGC  
>ASV:3085:Genus:Bacteroides  
TACAGAGGATCCGAGCGTTATCCGGATTTATTGGGTTAAAGGGAGCGTAGATGGATGTTTAAAGTCCAGTGTGAAAAGTTT  
GCGGCTCAACCGTAAATTTGCAAGTGTGATACTGGATATCTTGTAGTGCAGTTGAGGCAGGCGGAATTCGTGGTGTAGCGGTG  
AAATGCTTAGATATCACTAAGAACTCCGATTGCGAAGGCGAGCCTGCTAAGCTGCAACTGACATTGAGGCTCGAAAGTGTG  
GGTAT  
>ASV:3086:Genus:Lachnospiraceae\_FE2018\_group  
TACGTAGGGGCGAAGCGTTATCCGGATTTACTGGGTGTTAAGGGAGCGTAGACGGCTGTGCAAGTCTGAAGTAAAAGGCA  
TGGGCTCAACCTGTGGACTGCTTTGGAAGTGTGCAGCTAGAGTGTGCGGAGAGGTAAGTGAATTCCTAGTGTAGCGGTG  
AAATGCTTAGATATCACGAAGAACTCCGATTGCGAAGGCGAGCTTACTGGATTGTAACGACGCTGATGCTCGAAAGTGTG  
GGTAT  
>ASV:3087:Genus:UBA1819  
AACGTAGGGTGAAGCGTTGTCCGGAATTACTGGGTGTTAAGGGAGCGCAGGCGGATTGGCAAGTTGGGAGTAAAATCTA  
TGGGCTCAACCATAAATTTGCTTTCAAAGTGTGAGTCTTGTAGTGGTGTAGAGGTAGGCGGAATTCCTAGTGTAGCGGTG  
GAATGCGTAGATATCGGAGGAACACCAGTGGCGAAGGCGGCTTACTGGGCCTAAGTACGCTGAGGCTCGAAAGTGTG  
GGTAG  
>ASV:3088:Family:Lachnospiraceae  
TACGGAGGATCCGAGCGTTATCCGGATTTACTGGGTGTTAAGGGAGCGTAGACGGACTGGCAAGTCTGATGTGAAAGGCG  
GGGGCTCAACCCGTGACTGCATTGGAAGTGTAGTCTTGTAGTGCAGGAGGTAAGCGGAATTCCTAGTGTAGCGGTG  
AAATGCGTAGATATCAGCAGAACCCGATTGCGAAGGCGAGCCTGCTAGGTTGAAACAGACGCTGAGGCACGAAAGCGTG  
GGTAT  
>ASV:3089:Genus:Lachnospiraceae\_ND3007\_group  
TACGTATGGTGAAGCGTTATCCGGATTTACTTGGTGTAAAGGGAGCGTAGGTGGCAAGGCAAGCCAGAAGTAAAACCC  
GGGGCTCAACCGGAGTGTCTTTGGAAGTGTGATGCTAGAGTGCAGGAGGGTGAAGCGGAATTCCTAGTGTAGCGGTG  
AAATGCGTAGATATTAGGAGGAACACCAGTGGCGAAGGCGGCTACTGGACTGTAACGACACTGAGGCTCGAAAGCGTG  
GGGAG

>ASV:3090:Genus:Dialister  
TACGTAGGTGGCAAGCGTTGTCCGGAATTATTGGGCGTAAAGCGCGCAGGCGGCTTCTAAGTCCATCTTAAAAGTGC  
GGGGCTTAACCCCGTAGGGGATGAAACTGGGAAGTGGAGTATCGGAGAGGAAAGTGAATTCTTAGTGTAGCGGTGA  
AATGCGTAGAGATTAGGAAGAACACCCGGTGGCGAAGGCAGCTTTCTGGACGAAAACCTGACGCTGAGGCGCAAAGCGTGG  
GGAGC

>ASV:3091:Genus:Bacteroides  
TACGGAGGATCCGAGCGTTATCCGGATTTATTGGGTTTAAAGGGAGCGTAGGCGGATTGTTAAGTCAGTTGTGAAAAGTTT  
GCTGCTCAACCGTAAAATTGCAGTTGATACTGGCAGTCTTGAGTGCAGTAGAGGTGGGCTGAATTCGTGGTGTAGCGGTG  
AAATGCTTAGATATACGAAGAATCCGATTGCGAAGGCAGCTCACTGGAGTGAACCTGACGCTGATGCTCGAAAGTGTG  
GGTAT

>ASV:3092:Order:Rhodospirillales  
TACGAAGGGGGCAAGCGTTGTCCGGAATTACTGGGCGTAAAGGGTGTGTAGGCGGATTTGTAAGATAGTGGTGAATACC  
TGAGCTCAACTTAGGAATTGCACTTAATACTATAGATCTGGAGTGACAGAGAGGATATTGGAATACCCAGTGTAGAGGTG  
AAATTCGTAGATATTGGGTAGAACACCCAGTGGCGAAGGCAGTATCTGGCTGTCAACTGACGCTGAGGCACGAAAGCATG  
GGGAT

>ASV:3093:Kingdom:Bacteria  
TACGTAGGGAGCGAGCGTTGTCCGGAATAATTGGGCGTAAAGGGCGCGTAGGCGGCTCGGTAAGTCTGGAGTGAAGTCC  
TGCTTTTAAAGGTGGGAATTGCTTTGGATACTGTCGGGCTTGAGTGCAGTAGAGGTAGGCGGAATTCGTGGTGTAGCGGTG  
AAATGCTTAGATATACGAAGAATCCGATTGCGAAGGCAGCTCACTGGACTGTAACCTGACGCTGAGGCACGAAAGCGTG  
GGTAG

>ASV:3094:Genus:Bacteroides  
TACGGAGGATCCGAGCGTTATCCGGATTTATTGGATTTAAAGGGAGCGTAGGTGGATTGTTAAGTCAGTTGTGAAAAGTTT  
GCGGCTCAACCGTAAAATTGCACTTGAACCTGGCAGTCTTGAGTACAGTAGAGGTGGGCGGAATTCGTGGTGTAGCGGTG  
AAATGCTTAGATATACGAAGAATCCGATTGCGAAGGCAGCTCACTAGACTGCAACTGACACTGATGCTCGAAAGTGTG  
GGTAT

>ASV:3095:Species:asaccharolytica  
TACGTAGGGGGCGAGCGTTGTCCGGAATTATTGGGCGTAAAGGGTACGTAGGCGGTTTGTAAAGTTTGGCGTTAAATCAC  
GGGGCTCAACCCCGTTACGCGTTGAAAACCTGGCAACTTGTAGTAGTAGAGGGGACAGTGAATTCCTAGTGTAGCGGTGA  
AATGCGTAGAGATTAGGAAGAATACCCGGTGGCGAAGGCAGCTGTCTGGATACATACTGACGCTCAGGTACGAAAGCGTGG  
GGAGC

>ASV:3096:Genus:Fluviicola  
TACGGAGGGTGCAAGCGTTATCCGGAATCATTGGGTTTAAAGGGTCCGAGGCGGATTTATAAGTCAGTGGTGAATCTC  
TCGGCTCAACCGAGAATGCACTTGAATACTGTAAGTCTTGAATTCGGTTCGAAGTGGGCGGAATATGACATGTAGCGGTG  
AAATGCATAGATATGTATAGAACACCCGATAGCGAAGGCAGCTCACTAGGCTGGATTGACGCTCAGGGACGAAAGCGTG  
GGGAG

>ASV:3097:Species:phenylpyruvicus/sanguinis  
TACAGAGGGTGCAAGCGTTAATCGGAATTACTGGGCGTAAAGCGAGCGTAGGTGGCTTAATAAGTCAGATGTGAATCC  
CGGGCTTAACCTGGGAATGCACTGTGATACTGTTGGGCTAGAGTAGGTGAGAGGGAGGTAGAATTCAGGTGTAGCGGTG  
AAATGCGTAGAGATCTGAAGGAATACCGATGGCGAAGGCAGCTCCTGGCATATACTGACACTGAGGTTGAAAGCGTG  
GGTAG

>ASV:3098:Family:Chitinophagaceae  
TACGGAGGGTGCAAGCGTTATCCGGATTTACTGGGTTTAAAGGGTGCCTAGGTGGGCAAGTAAGTCAGTGGTGAATCTC  
CGGGCTTAACCCGGAATGCACTTGAATACTGTTGGGCTAGAGTAGGTGAGAGGGAGGTAGAATTCAGGTGTAGCGGTG  
AAATGCTTAGATATGACATAGAACACCAATTGCGAAGGCAGCTGGCTACACAATATTGACACTGAGGCACGAAAGCGTG  
GGGAT

>ASV:3099:Family:Lachnospiraceae  
TACGTAGGGGGCAAGCGTTATCCGGAATTACTGGGTTTAAAGGGAGCGTAGACGCTGTGCAAGTCTGAAGTGAAGGCC  
GGGGCTCAACCCGGGACTGCTTTGAAACTGTATAGCTAGAGTGTGGAGAGGTAAGTGAATTCGTGGTGTAGCGGTG  
AAATGCTTAGATATACGAAGAATCCGATTGCGAAGGCAGCTTACTGGATTGTAACCTGACGCTGATGCTCGAAAGTGTG  
GGTAT

>ASV:3100:Species:komagatae  
TACGAAGGGGGCTAGCGTTGTCCGGAATCACTGGGCGTAAAGGGCGCGTAGGCGGCTTTTAAAGTGGGGGTGAAAGCCT  
GTGGCTCAACACAGAATTGCCTTCGATACTGGGAGACTTGAGTTCGGAAGAGGTTGGTGAATGCGAGTGTAGAGGTG  
AAATTCGTAGATATTCGAAGAACACCCGGTGGCGAAGGCAGGCAACTGGTCCGACACTGACGCTGAGGCGCAAAGCGTG  
GGGAG

>ASV:3101:Genus:Dielma  
TACGTAGGTGGCAAGCGTTATCCGGAATTATTGGGCGTAAAGGGTGCCTAGGCGGCGAGATAAGTCTGAGGTAAAAGCCC  
GTGGCTCAACACCGGTAAGCCTTGGAACTGTCTGGCTGGAGTGCAGGAGAGGACAATGGAATTCATGTGTAGCGGTAA  
AATGCGTAGATATATGGAGGAACACCCGGTGGCGAAGGCAGGTTGTCTGGCCTGTAACCTGACGCTGAAGCACGAAAGCGTG  
GGAGC

>ASV:3102:Genus:Oscillibacter  
TACGTAGGTGGCAAGCGTTGTCCGGAATTACTGGGTTTAAAGGGCGTGTAGCCGGGAAGGCAAGTCAGATGTGAATCTG  
GAGGCTCAACCTCAAACCTGCACTTTGAAACTGTCTTTCTTGAGTATCGGAGAGGTATCGGAATTCCTTGTGTAGCGGTG  
AAATGCGTAGATATAAGGAGGAACACCCAGTGGCGAAGGCAGTACTGGACGACAACCTGACGCTGAGGCGCAAAGCGTG  
GGGAG

>ASV:3103:Genus:Veillonella  
TACGTAGGTGGCAAGCGTTGTCCGGAATTATTGGGCGTAAAGGGCGCGCAGGCGGATCAGTTAGTCTGTCTTAAAAGTTT  
GGGGCTTAACCCCGTATGGGATGAAACTGCTGATCTAGATATCGGAGAGGAAAGTGAATTCCTAGTGTAGCGGTGA

AATGCGTAGATATTAGGAAGAACACCCAGTAGCGAAGGCGACTTTCTGGACGAAAACCTGACGCTGAGGCGCGAAAAGCCAGG  
GGAGC  
>ASV:3104:Family:Lachnospiraceae  
TACGTAGGGGGCAAGCGTTATCCGGATTTACTGGGTTTAAAGGGAGCGTAGACGGTAAAGCAAGTCTGAAGTGAAGGCC  
GGGGCTAACCCCGGACTGCTTTGAAAAGTCTAACTAGAGTGTGGAGAGGTAAGCGGAATTCCTAGTGTAGCGGTG  
AAATGCTTAGATATACGAAGAACCCGATTGCGAAGGCGACTTTCTGGACGAAAACCTGACGCTGAGGCTCGAAAAGTGTG  
GGTAT  
>ASV:3105:Genus:Veillonella  
TACGTAGGTGGCAAGCGTTGTCCGGAATTATTGGGCGTAAAGCGCGCAGGCGGATCAGTCAGTCTGTCTTAAAAGTTC  
GGGGCTAACCCCGTGAGGGGATGAAACTGCTGATCTAGAGTATCGGAGAGGAAAGTGAATTCCTAGTGTAGCGGTGA  
AATGCGTAGAGATTAGGAAGAACACCCGGTGGCGAAGGCGACTTTCTGGACGAAAACCTGACGCTGAGGCGCGAAAAGCGTG  
GGAGC  
>ASV:3106:Family:Lachnospiraceae  
TACGTAGGGGGCAAGCGTTATCCGGATTTACTGGGTGTAAGGGAGCGTAGACGGCAAGGCAAGTCTGAAGTGAAGGCC  
GGTGCTAACCCCGGACTGCTTTGAAAAGTGTTCGGCTGGAGTGCCGGAGAGGTAAGCGGAATTCCTAGTGTAGCGGTG  
AAATGCGTAGAGATTAGGAAGAACACCCGGTGGCGAAGGCGACTTTCTGGACGAAAACCTGACGCTGAGGCGCGAAAAGCGTG  
GGAG  
>ASV:3107:Genus:Ruminococcaceae\_UCG-010  
TACGTAGGTGGCAGCGTTATCCGGAATTATTGGGTGTAAGGGTGCCTAGGCGGGATGTAAGTCAAGTGTGAAATCTA  
AGGGCTAACCCCTAACTGCATTTGAAACTTATGTTCTTGTAGTGGAGTAGAGGCAAGCGGAATTCCTGGTGTAGCGGTG  
AAATGCGTAGATATCAGGAGGAACACCCGGTGGCGAAGGCGGCTTCTGGGCTTTTACTGACGCTGAGGCACGAAAAGTGTG  
GGTAG  
>ASV:3108:Genus:Lachnospiraceae\_UCG-003  
TACGTAGGGGGCAAGCGTTATCCGGATTTACTGGGTGTAAGGGAGCGTAGATGGCATGACAAGTCTGAAGTGAAGGCC  
GGGGCTAACCCCGGACTGCTTTGAAAAGTGTAACTAGAGTGCAGGAGAGGTAAGCGGAATTCCTAGTGTAGCGGTG  
AAATGCGTAGATATTAGGAGGAACACCCAGTGGCGAAGGCGGATTGCTGGACGACAACCTGACGCTGAGGCGCGAAAAGCGTG  
GGAG  
>ASV:3109:Family:Ruminococcaceae  
TACGTAGGGAGCAGCGTTGTCCGGAATTACTGGGTGTAAGGGTGCCTAGGCGGGCAATCAAGTCAGGCGTGAATCTA  
TGGGCTAACCCATAGTCTGCGCTTGAAGTGAATGTCTTGTAGTGAAGTAGAGGTAAGCGGAATTCCTGGTGTAGCGGTG  
AAATGCGTAGAGATCGGAGGAACACCCAGTGGCGAAGGCGGCTTACTGGGCTTTTACTGACGCTGAGGCACGAAAAGCATG  
GGTAG  
>ASV:3110:Family:Lachnospiraceae  
TACGTATGGTGAAGCGTTATCCGGATTTACTGGGTGTAAGGGAGCGCAGGCGGTTTGATAAGTCTGAAGTAAAGGCT  
GTGGCTAACCATAGTTCGCTTTGAAAAGTGTCAAACCTTGTAGTGCAGAGGGGAGAGCGGAATTCCTAGTGTAGCGGTGA  
AATGCGTAGATATTAGGAGGAGCACCAAGTGGCGAAGGCGGCTTACTGGACGATAACTGACGCTGAGGCTCGAAAAGCGTG  
GGAGC  
>ASV:3111:Family:Lachnospiraceae  
TACGTAGGGAGCAAGCGTTATCCGGATTTACTGGGTGTAAGGGAGCGTAGACGGTGTGGCAAGTCTGATGTGAAAAGGCA  
TGGGCTAACCTGTGGACTGCATTGAAAAGTGTCACTTGTAGTGCAGAGGGGTAAGCGGAATTCCTAGTGTAGCGGTG  
AAATGCTTAGATATACGAAGAACCCGATTGCGAAGGCGACTTTCTGGTCTGTAACCTGACGCTGAGGCTCGAAAAGTGTG  
GGTAT  
>ASV:3112:Genus:Staphylococcus  
TACGTAGGTGGCAAGAGTTATCCGGAATTATTGGGCGTAAAGCGCGCTAGGCGGTTTTTTAAGTCTGATGTGAAAAGCCC  
ACGGCTAACAGTGGAGGGTATTGAAAAGTGTAAAAGTGTAGTGCAGAGAGGAAAGTGAATTCCTAGTGTAGCGGTG  
AAATGCGCAGAGATATGAGGAACACCCAGTGGCGAAGGCGACTTTCTGGTCTGTAACCTGACGCTGATGTGCGAAAAGCGTG  
GGGAT  
>ASV:3113:Genus:Family\_XIII\_AD3011\_group  
TACGTAGGGGGCAAGCGTTATCCGGAATTATTGGGCGTAAAGAGTGCCTAGGTTGTTACCTAAGCGCAGGATATAAGGCA  
ATGGCTAACCATTTGTCGCCCTGCGAACTGGGCTACTTGTAGTGCAGGAGAGGAAAGCGGAATTCCTAGTGTAGCGGTGA  
AATGCGTAGATATTAGGAGGAACACCCAGTGGCGAAGGCGGCTTTCTGGACTGTAACCTGACACTGAGGCACGAAAAGCGTG  
GGAGC  
>ASV:3114:Genus:Hydrogenoanaerobacterium  
TACGTAGGTGGCAAGCGTTGTCCGGAATTACTGGGTGTAAGGGAGCGTAGGCGGGAAGGCAAGTGAATGTTAAATCTA  
CCGGCTAACCCGGTAGTTCGCTTCAAAGTGTCTTGTAGTGAAGTAGAGGTAGGCGGAATTCCTAGTGTAGCGGTGA  
AATGCGTAGATATTAGGAGGAACACCCAGTGGCGAAGGCGGCTTCTGGACTGTAACCTGACACTGAGGCACGAAAAGCGTG  
GTAGC  
>ASV:3115:Genus:Bacteroides  
TACGGAGGATCCGAGCGTTATCCGGATTTATTGGGTTTAAAGGGAGCGTAGGTGGATTGTTAAGTCAAGTGTGAAAAGTTT  
GCGGCTAACCCGTAATGCAAGTGAAGTGGGAGTCTTGTAGTACAGTAGAGGTGGGCGGAATTCGTGGTGTAGCGGTG  
AAATGCGTAGATATTGGAAGAACACCCAGTGGCGAAGGCGACTTTCTGGACTGAAAACCTGACGCTGAGGCACGAAAAGCGTG  
GGGAG  
>ASV:3116:Genus:Lachnospiraceae\_UCG-010  
TACGTAGGGGGCAAGCGTTATCCGGAATTACTGGGTGTAAGGGAGCGTAGGCGGCACGCCAAGCCAGATGTGAAAAGCCC  
GAGGCTAACCTCGCGGATTGCATTTGAAAAGTGGCGAGCTAGAGTACAGGAGAGGAAAGCGGAATTCCTAGTGTAGCGGT  
GAAATGCGTAGATATTAGGAAGAACACCCAGTGGCGAAGGCGGCTTTCTGGACTGAAAACCTGACACTGAGGCACGAAAAGCGTG  
GGGA  
>ASV:3117:Genus:Ruminiclostridium\_5

TACGTAGGGAGCGAGCGTTGTCCGGATTTACTGGGTGTAAGGGTGCCTAGGCGGGCCCGAAGTCAGACGTGAAAGCCA  
CAGGCTCAACCTGTGAATTGCGTTTAAACTGTGGTCTTGAAGTAGAGGTAGGCGGAATCCCGGTGTAGCGGTG  
AAATGCGTAGAGATCGGGAGGAACACCAGTGGCGAAGGCGGCTACTGGCTTTAACTGACGCTGAGGCACGAAAGCGTG  
GGTAG  
>ASV:3118:Order:Bacteroidales  
TACGGAGGATCCGAGCGTTATCCGGATTTATTGGGTTAAAGGGAGCGTAGGCGGACGCTTAAGTCAGTTGTGAAAATTT  
GCGGCTCAACCGTAAAATTGCAAGTTGATACTGGGTGCTTGAAGTAGAGGCGAGGCGGAATTCCTAGTGTAGCGGTG  
AAATGCGTAGATATTAGGAGGAACGCCAGTGGCGAAGGCGGCTGCTGGACTGTTACTGACACTGAGGCACGAAAGCGTG  
GGGAG  
>ASV:3119:Family:Lachnospiraceae  
TACGTATGGTCAAGCGTTATCCGGATTTACTGGGTGTAAGGGAGCGTAGGCGGCTCTGCAAGTCTGATGTGAAAACCC  
GGGGCTCAACCCGGGACTGCATTGAAAAGTGTAGGACTAGAGTGTGCGAGGGGTAAGGGGAATCCAGTGTAGCGGTG  
AAATGCGTAGATATTGGGAGGAACACCAGTGGCGAAGGCGGCTTTCTGGACTGTGCTGACGCTGAGATGCGAAAGCCAG  
GGTAG  
>ASV:3120:Family:Ruminococcaceae  
TACGTAGGTGGCAAGCGTTGTCCGGAAATTTACTGGGTGTAAGGGTGCAGGCGGGTGGTCAAGTTGGATGTGAAAGGTA  
TGGGCTTAACCATAGACTGCATCCAAAAGTATTCTTGAAGTAGAGGCGAGGCGGAATCCAGTGTAGCGGTG  
GAATGCGTAGATATTGGGAGGAACACCAGTGGCGAAGGCGGCTGCTGGGCTTTAACTGACGCTGAGGCACGAAAGCATG  
GGGAG  
>ASV:3121:Order:Bacteroidales  
TACGGAGGATCCGAGCGTTATCCGGATTTATTGGGTTAAAGGGTGCCTAGGCGGCTTTTAAAGTCAGCGGTGAAAGTCT  
GTGGCTCAACCATAGAAATGCGGTTGAAAAGTGGGGGCTTGAAGTAGTTTGAAGTAGGCGGAATCCCGGTGTAGCGGTG  
AAATGCGTAGATATTGGGAAGAACCAATGGCGAAGGCGAGTCTCTGGGCCCTCACTGACGCTGAGGCACGAAAGCGTG  
GGGAG  
>ASV:3122:Genus:Parabacteroides  
TACGGAGGATCCGAGCGTTATCCGGATTTATTGGGTTAAAGGGTGCCTAGGCGGCTTTTAAAGTCAGCGGTGAAAGTCT  
GTGGCTCAACCATAGAAATGCGGTTGAAAAGTGGGGGCTTGAAGTAGTTTGAAGTAGGCGGAATGCGTGGTGTAGCGGTG  
AAATGCGTAGATATTAGGAAGAACACCAGTGGCGAAGGCGACTTTCTGGACGAAAAGTACGCTGAGGCACGAAAGCCAG  
GGGAG  
>ASV:3123:Genus:Erysipelotrichaceae\_UCG-006  
TACGTAGGTGGCGAGCGTTATCCGGAAATTTATTGGGCTGTAAGGGTGCCTAGGCGGCCGACTAAGTTCAAGGTGAAAGCGT  
GGGGCTCAACCCATAAAGCCTTGATACTGGTTGGTGGAGTACTGGAGAGGGTAGTGGAAATCCATGTGTAGCGGTAA  
AATGCGTAGATATTGGGAGGAACACCAGGAGGCGAAGGCGGCTACCTGGACAGTAAGTACGCTGAGGCACGAAAGCGTG  
GGAGC  
>ASV:3124:Genus:Alistipes  
TACGGAGGATCCAAGCGTTATCCGGATTTATTGGGTTAAAGGGTGCCTAGGCGGTGAGATAAGTTAGAGGTGAAATCC  
GGTCTTAACCCCGGAGCGTCTCTAACTACTGTTGACTAGAGTAGTTGCGGTAGGCGGAATGTATGGTGTAGCGGTG  
AAATGCGTAGATATTACAGAACACCAGATTGCGAAGGCGAGCTTACCAAGCTATATCTGACGTTGAGGCACGAAAGCGTG  
GGGAG  
>ASV:3125:Class:Bacteroidia  
TACGGAGGATGCAAGCGTTATCCGGAAATTTATTGGGTTAAAGGGTCCGAGGCGGCCGTTAAGTCAGTGTGAAAACCC  
GGGGCTCAACCCCGGAGCGTGTCTACAGATACTGGCGGCTAGAGAAAAGTCTGGAGGCAGCGGAATGTGACAAGTAGCGGTG  
AAATGCGTAGATATTGTACAGAACACCAGTAGCGAAAGCAGCTGCTAAGACTTATCTGACGCTCAGGGACGAAAGCGTG  
GGGAG  
>ASV:3126:Genus:Parabacteroides  
TACGGAGGATCCGAGCGTTATCCGGATTTATTGGGTTAAAGGGTGCCTAGGCGGCTTTTAAAGTCAGCGGTGAAAGTCT  
GTGGCTCAACCATAGAAATGCGGTTGAAAAGTGGGGGCTTGAAGTAGTTTGAAGTAGGCGGAATGCGTGGTGTAGCGGTG  
AAATGCGTAGATATTACAGAACACCAGTAGCGAAGGCGAGCTGCAAGCCATGACTGACGCTGATGACGAAAGCGTG  
GGGAT  
>ASV:3127:Family:Enterobacteriaceae  
TACGGAGGATCCGAGCGTTATCCGGATTTATTGGGTTAAAGGGAGCGTAGATGGATGTTTAAAGTCTGATGTGAAATCCC  
CGGGCTCAACCTGGGAAGTGCATCTGATACTGGCAAGCTTGAAGTCTGCTAGAGGGGGGTAGAATCCAGGTGTAGCGGTG  
AAATGCGTAGAGATCTGGAGGAATACCAGTGGCGAAGGCGGCCCTGGACGAAGACTGACGCTCAGGTGCGAAAGCGTG  
GGGAG  
>ASV:3128:Genus:Ruminococcaceae\_UCG-014  
TACGTAGGGAGCGAGCGTTATCCGGAAATTTATTGGGTGTAAGGGTGCCTAGACGGGAAGATAAGTTAGTTGTGAAATCCC  
TCGGCTTAACCTGAGGAACTGCAACTAAAAGTGTCTTCTTGAAGTAGAGGAGAGGTAAGTGGAAATCCATGTGTAGCGGTG  
AAATGCGTAGATATTAGGAGGAACACCAGTGGCGAAGGCGACTTACTGGACTGTAAGTACGCTTGGAGGCACGAAAGTGTG  
GGGAG  
>ASV:3129:Genus:Asaccharospora  
TACGTAGGGGCTAGCCTTATCCGGATTTACTGGGCTAAAGGGTGCCTAGGCGGCTTTTAAAGTCAGGAGTAAAAGGCT  
ACGGCTCAACCGTAGTAAGCCTTTGAAAAGTGGGAACTTGAAGTAGAGGAGAGAGTGGAACTCCATGTGTAGCGGTGA  
AATGCGTAGATATTACGAAGAACTCCGATTGCGAAGGCGAGCTTACTGGATTGTAAGTACGCTGATGCTCGAAAGTGTG  
GTATC  
>ASV:3130:Genus:Bacteroides  
TACGGAGGATCCGAGCGTTATCCGGATTTATTGGGTTAAAGGGAGCGTAGGCGGATTTAAAGTCAGTTGAGAAAATTT  
GCGGCTCAACCGTAAAATTGCAAGTTGATACTGGCAGTCTTGAAGTAGAGGCGGCGGAATTCGTGGTGCAGCGGTG  
AAATGCTTAGAGATATTACAGAACACCAGATTGCGAAGGCGAGCTTACCAAACTATATCTGACGTTGAGGCACGAAAGCGTG

GGGAG

>ASV:3131:Family:Ruminococcaceae

TACGTAGGGAGCGAGCGTTGTCCGGAATTACTGGGTGTAAGGGGTGCGTAGGCGGCAGAGCAAGTCAGATGTGAAATACA  
CGGGCTTAACCGTGGGCTGCATTTGAAACTGTATGCTTAGAGTGCCGGAGAGGTAATCGGAATTCCTTGTGTAGCGGTG  
AAATGCGTAGAGATCGGGAGGAACACCAGTGGCGAAGGCGCCTGCTGGCTTTAACTGACGCTGAGGCACGAAAGCGTG  
GGGAG

>ASV:3132:Order:Bacteroidales

TACGTAGGTGGCAAGCGTTGTCCGGAATTACTGGGTGTAAGGGGAGCGTAGGTGGGATGCCAAGTCAGCTGTGAAAACCTA  
TGGGCTTAACCGTGTAGACTGCAGTTGAAACTGGTATTCTTAGAGTGAAGTAGAGGTTGGCGGAATTCGTGGTGTAGCGGTG  
AAATGCTTAGATATCACGAAGAACCAGTGGCGAAGGCAGCACACTGGAGTGAACGACGCTGATGCTCGAAAGTGTG  
GGTAT

>ASV:3133:Family:Lachnospiraceae

TACGTATGGTGAAGCGTTATCCGGATTTACTGGGTGTAAGGGGAGCGTAGACGGAGTGGAAGTCTGATGTGAAAACCC  
GGGGCTCAACCCCGGGACTGCATTGAAACTGTCAATCTAGAGTACCGGAGAGGTAAGCGGAATTCCTAGTGTAGCGGTG  
AAATGTTTAGATATCACGAAGAACCAGTGGCGAAGGCAGCTTACTAACCTGTAACGACATTGATGCTCAAAGTGTG  
GGTAT

>ASV:3134:Genus:Blautia

TACGTAGGGGGCGAGCGTTATCCGGATTTACTGGGTGTAAGGGGAGCGTAGACGGCGCAGCAAGTCTGATGTGAAAGGCA  
GGGGCTTAACCCCTGGACTGCATTGAAACTGTTGAGCTTAGAGTGCCGGAGGGGTAAGCGGAATTCCTAGTGTAGCGGTG  
AAATGCGTAGATATTAGGAGGAACACCAGTGGCGAAGGCGCCTTACTGGACGGTAACTGACGTTGAGGCTCGAAAGCGTG  
GGGAG

>ASV:3135:Genus:Parabacteroides

TACGGAGGATCCGAGCGTTATCCGGATTTACTGGGTGTAAGGGGTGCGTAGGCGGCCTTTTAAAGTCAGCGGTGAAAGTCT  
GTGGCTCAGCCATAGAATTGCCGTTGAAACTGGGGGCTTAGAGTATGTTTGGAGCAGGCGGAATGCGTGGTGTAGCGGTG  
AAATGCATAGATATCACGAAGAACCAGTGGCGAAGGCAGCTCACTGGACTGCAACTGACACTGATGCTCGAAAGTGTG  
GGTAT

>ASV:3136:Species:stomatis

TACGTAGGGGGCTAGCGTTATCCGGATTTACTGGGCGTAAAGGGTGCCTTAGGTGGTCCCTCAAGTCGGTGGTTAAAGGCT  
ACGGCTCAACCGTAGTAAGCCGCCGAAACTGGAGGACTTAGAGTGCAGGAGAGGAAAGTGAATTCACAGTGTAGCGGTGA  
AATGCGTAGATATTGGGAGGAACACCAGTAGCGAAGGCGCCTTCTGGACTGCAACTGACACTGAGGCACGAAAGCGTGG  
GTAGC

>ASV:3137:Family:Bifidobacteriaceae

TACGTAGGGTGAAGCGTTATCCGGATTTACTGGGCGTAAAGGGTGCCTTAGGCGGTTTCGTCGCGTCCGGTGTGAAAGTCC  
ATCGCTTAACCGTGGATCCGCGCCGGGTACGGGCGGGCTTAGAGTGCCTTAGGGGAGACTGGAATTCCTGGTGTAGCGGTG  
GAATGCGCAGATATCGGGTGAACACCAGTGGCGAAGGCGCCTTCTGGGCGGAGACCGACTGAGGAGCGAAAGCGTG  
GGGAG

>ASV:3138:Kingdom:Bacteria

TACGGAGGATCTGAGCGTTATCCGGATTTACTGGGTTAAAGGGGAGCGTAGGCGGACGCTTAAGTCAGTTGTGAAAGTTT  
GCGGCTCAACCGTAAATTCAGTTGATACTGGAAGTCTTAGAGTGCAGGAGAGGAAAGGGGAATTCACAGTGTAGCGGTG  
AAATGCGTAGATATTGGGAGGAACACCAGTGGCGAAGGCGCCTTCTGGACTGTGCTGACGCTGAGATGCGAAAGCCAG  
GGTAG

>ASV:3139:Genus:Christensenellaceae\_R-7\_group

TACGTAGGGGGCAAGCGTTGTCCGGAATTTACTGGGCGTAAAGGGTGCCTTAGGCGGCTTTCAAGTTGGATGTGAAATCCC  
CGTGCTTAACATGGGAACTGCATCCAAAACCTGGAGGGCTTAGAGTGTGAAGAGGTAAGTGAATTCACAGTGTAGCGGTG  
AAATGCGTAGATATTGGGAGGAACACCAGTGGCGAAGGCGACTTACTGGGCCACAACGACGCTGAGGACGAAAGCGTG  
GGGAG

>ASV:3140:Genus:F0332

TACGTAGGGCGCGAGCGTTGTCCGGAATTTACTGGGCGTAAAGGGTGCCTTAGGCGGCTTGTGCGCTGCTGTGAAAATGC  
GGGGCTTAACCTCGTACGTGCAGTGGGTACGGGCGAGCTAGAGTGCCTTAGGGGTGACTGGAATTCCTGGTGTAGCGGTG  
GAATGCGCAGATATCAGGAGGAACACCAGTGGCGAAGGCGAGTCACTGGGCTGTTACTGACGCTGAGGAGCGAAAGCGTG  
GGGAG

>ASV:3141:Genus:Christensenellaceae\_R-7\_group

TACGTAGGGGGCAAGCGTTGTCCGGAATAATTGGGCGTAAAGGGGCGCTAGGCGGCTCGGTAAGTCTGGAGTAAAAGTCC  
TGCTTTTAAAGTGGGAATTGCCTTGGATACTGTGCGGCTTAGAGTGCAGGAGAGGTTAGTGAATTCACAGTGTAGCGGTG  
AAATGCTTAGATATCACGAAGAACCAGTGGCGAAGGCGAGCTTACTGGACTGTAACGACGCTGATGCTCGAAAGTGTG  
GGTAT

>ASV:3142:Family:Lachnospiraceae

TACGTAGGGGGCAAGCGTTATCCGGATTTACTGGGTGTAAGGGGAGCGTAGACGGAGCAGCAAGTCTGATGTGAAAGGCA  
GGGGCTCAACCCCTGGACTGCATTGAAACTGTTGATCTTAGAGTACCGGAGGGGTAAGCGGAATTCCTAGTGTAGCGGTG  
AAATGCTTAGATATCACGAAGAACCAGTGGCGAAGGCAGCTCACTGGACTGCAACTGACACTGATGCTCGAAAGTGTG  
GGTAT

>ASV:3143:Family:Ruminococcaceae

AACGTAGGTCACAAGCGTTGTCCGGAATTACTGGGTGTAAGGGGAGCGCAGGCGGGAAGACAAGTTGGAAGTAAAATCTA  
TGGGCTCAACCCATAAACTGCTCTCAAAACTGTTTTCTTAGAGTAGTGCAGAGGTAGGCGGAATGTATGGTGTAGCGGTG  
AAATGCTTAGAGATCATACAGAACCAGAGTGGCGAAGGCGAGTTACCAAACTATATCTGACGTTGAGGCACGAAAGCGTG  
GGGAG

>ASV:3144:Order:Mollicutes\_RF39

TACGTAGGGAGCGAGCGTTATCCGGATTTACTGGGCGTAAAGAGTTCGTAGGCGGTTTGTAAAGTCTAAGATTAAGCCC



GAGGCTTAACCTCGTTTCGTTTTAGAACTGGCAGACTTGAGTATGGTAGAGGCAAATGGAATTCCTAGTGTAGCGGTGA  
AATGCGTAGATATTAGGAGGAACACCAGTGGCGAAGGCGGTTTCTGGGCCATTACTGACGCTGAGGAACGAAAGCGTGG  
GGAG

>ASV:3145:Order:Bacteroidales

TACGTAGGTGGCGAGCGTTATCCGGATTTATTGGGTTAAAGGGAGCGTAGATGGGTTGTTAAGTCAGTTGTGAAAGTTT  
GCGGCTCAACCGTAAGATTGCAATTGATACTGGCAGTCTTGAGTACAGTTGAGGTAGCGGGAATCCCGGTGTAGCGGTG  
AAATGCGTAGAGATCGGGAGGAACACCAGTGGCGAAGGCGGCTGCTGGGCTTAACTGACGCTGAGGCACGAAAGCGTG  
GGTAG

>ASV:3146:Order:Clostridiales

TACGTATGGTGAAGCGTTATCCGGATTTACTGGGTGTAAGGGCGTGCAGCCGGGAATGCAAGTCAGATGTGAAATCCA  
TGGGCTTAACCCATGAACTGCAATTTGAAACTGTAGATCTTGAGTGTCCGGAGGGCAATCGGAATTCCTAGTGTAGCGGTG  
AAATGCTTAGATATCACGAAGAACTCCGATTGCGAAGGCAGCTTCTGGACTGTAACGACGCTGATGCTCGAAAGTGTG  
GGTAT

>ASV:3147:Genus:Ruminococcaceae\_UCG-013

TACGTAGGTGGCGAGCGTTGTCCGGATTTACTGGGTGTAAGGGCGTGTAGGCGGGATTACAAGTCAGATGTGAAATACC  
GGGGCTTAACCCGGGCTGCAATTTGAAACTGTAGTCTTGAGTGCCGGAGAGGAAAGCGGAATTCCTAGTGTAGCGGTG  
AAATGCGTAGATATTAGGAGGAACACCAGTGGCGAAGGCGGCTTCTGGACGTAACGACGCTGAGGCACGAAAGCGTG  
GGGAG

>ASV:3148:Genus:Phascolarctobacterium

TACGGAGGATTCAAGCGTTATCCGGAAATTATTGGGCGTAAAGAGCATGTAGGCGGCTTAATAAGTCGAGCGTGAATATGC  
GGGGCTCAACCCCGTATGGCGCTGGAAGCTGTAGGCTTGAGTGCAGGAGAGGAAAGGGGAATTCCTAGTGTAGCGGTGA  
AATGCGTAGATATTAGGAGGAACACCAGTGGCGAAGGCGGCTCACTGGACTGTAACGACACTGAGGCTCGAAAGCGTGG  
GGAG

>ASV:3149:Species:diversum/neglectum/pumilum/vescum

TACGTAGGGGGCAAGCGTTATCCGGAAATTATTGGGCGTAAAGAGTGCAGTGGTGGTTACCTAAGCGCAAGGTTAATTTA  
GAGGCTCAACCTCTACTTGCCTTGCGAAGCTGGGCTACTTGAGTGCAGGAGGGGAAAGCGGAATTCCTAGTGTAGCGGTGA  
AATGCGTAGATATTAGGAGGAACACCAGCGGCGAAGGCGGCTTCTGGACTGTAACGACACTGAGGCACGAAAGCGTGG  
GTAGC

>ASV:3150:Family:Ruminococcaceae

TACGTAGGGGGCAAGCGTTGTCCGGAAATTACTGGGTGTAAGGGAGCGCAGGCGGGAGAACAAAGTTGGAAGTGAATCCA  
TGGGCTCAACCCATGAACTGCTTTCAAAGCTGTTTTCTTGAGTAGTGCAGAGGTAGGCGGAATTCCTAGTGTAGCGGTG  
GAATGCGTAGATATCACGAAGAACTCCGATTGCGAAGGCAGCTGCTAAGCTGCAACTGACATTGAGGCTCGAAAGTGTG  
GGTAT

>ASV:3151:Family:Lachnospiraceae

TACGTATGGTGAAGCGTTATCCGGATTTACTGGGTGTAAGGGAGCGTAGACGGTGTGGCAAGTCTGGTGTGAAAGGCA  
TGGGCTCAACCTGTGGACTGCATTGGAAGCTGCATACTTGAGTGCCGGAGGGGTAAGCGGAATTCGTGGTGTAGCGGTG  
AAATGCTTAGATATCACGAAGAACTCCGATTGCGAAGGCAGCTCACTAGACTGTTACTGACACTGATGCTCGAAAGTGTG  
GGTAT

>ASV:3152:Family:Lachnospiraceae

TACGTAGGTGGCAAGCGTTATCCGGATTTATTGGGTTAAAGGGAGCGTAGACGGCGAAGCAAGTCTGAAGTGAATACCC  
AGGGCTCAACCTGGGACTGCTTTGGAAGCTGTTTCTAGAGTGTCCGGAGAGGTAAGTGAATTCCTAGTGTAGCGGTG  
AAATGCGTAGATATCACGCAGAACTCCGATTGCGAAGGCAGCTTACTAAACCATAACTGACACTGAAGCACGAAAGCGTG  
GGGAT

>ASV:3153:Species:faecalis/faecium

TACGTAGGTGGCAAGCGTTGTCCGGATTTATTGGGCGTAAAGCGAGCGCAGGCGGTTTCTTAAGTCTGATGTGAAAGCCC  
CCGGCTCAACTGGGAGGGTATTGGAAGCTGGGAGACTTGAGTGCAGAAAGAGGAGTGAATTCCTAGTGTAGCGGTG  
AAATGCGTAGATATTAGGAGGAACACCAGTGGCGAAGGCGGCTTCTGGTCTGTAACGACGCTGAGGCTCGAAAGCGTG  
GGGAG

>ASV:3154:Order:Bacteroidales

TACGTATGGTGAAGCGTTATCCGGATTTATTGGGTTAAAGGGAGCGTAGATGGGTTGTTAAGTCAGTTGTGAAAGTTT  
GCGGCTCAACCGTAAATTTGCAATTGATACTGGCAGTCTTGAGTACAGTTGAGGTAGCGGGAATCCCGGTGTAGCGGTG  
GAATGCGTAGATATCGGGAGGAACACCAGTGGCGAAGGCGGCTACTGGGCACCAACTGACGCTGAGGCTCGAAAGTGTG  
GGTAG

>ASV:3155:Genus:Lachnoclostridium

TACGTAGGGGGCAAGCGTTATCCGGATTTACTGGGTGTAAGGGAGCGTAGACGGCTTAGCAAGTCTGAAGTGAAGTCC  
GGGCTCAACCCGGGACTGCTTTGGAAGCTGTTAAGCTGGAGTGTGGAGAGGTAAGCGGAATTCCTAGTGTAGCGGTG  
AAATGCGTAGATATTAGGAGGAACACCAGTGGCGAAGGCGGCTTACTGGACAGTAACGACGTTGAGGCTCGAAAGCGTG  
GGGAG

>ASV:3156:Family:Lachnospiraceae

TACGTAGGGGGCAAGCGTTATCCGGATTTACTGGGTGTAAGGGAGCGTAGACGGTGTGGCAAGTCTGGTGTGAAAGGCA  
TGGGCTCAACCTGTGGACTGCATTGGAAGCTGCATACTTGAGTGCCGGAGGGTAAGCGGAATTCGTGCTGAGCGGTG  
AAATGCTTAGATATCACGAAGAACTCCGATTGCGAAGGCAGCTTACTGGATTGTAACGACGCTGATGCTCGAAAGTGTG  
GGTAT

>ASV:3157:Genus:Akkermansia

TACAGAGGATTCAAGCGTTATCCGGATTTATTGGGTTAAAGGGTGCAGTGGCTGTTTCTGAAGTCTGTGTGAAAGGCG  
CGGGCTCAACCCGGGACGGACATGATACTGCGAGACTAGAGTAATGGAGGGGAAACCGGAATTCCTGGTGTAGCAGTG  
AAATGCGTAGATATCGAGAGGAACACTCGTGGCGAAGGCGGTTCTGGACATTAACGACGCTGAGGCACGAAAGGCCAG  
GGGAG

>ASV:3158:Kingdom:Bacteria  
AACGTAGGTCACAAGCGTTGTCCGGAATTACTGGGTGTAAAGGAAGCGCAGGCGGGAAGACAAGTTGGAAGTGAAAGCTA  
TGGGCTCAACCATAAACTGCTTTCAAACCTGTTTTCTTGAGTAGTGCAGAGGTAGCGGGAATTCGTGGTGTAGCGGTG  
AAATGCTTAGAGATCATACAGAACCAGGATTGCGAAGGCAGCTTACCACAACTATATCTGACGTTGAGGCACGAAAGCGTG  
GGGAG

>ASV:3159:Genus:Butyricimonas  
TACGGGGGATGCGAGCGTTATCCGGATTTATTGGGTTAAAGGGCGCGTAGGCGGGACGTCAAGTCAGCGGTAAAAGACT  
GCAGCTAAACTGTAGCACGCCGTTGAAACTGGGCGCTGGAGACGAGAGGGAGGCGGAACAAGTGAAGTAGCGGTGA  
AATGCATAGATATTAGGAGGAACACCAGTGGCGAAGGCGGTGCGCTGGTCTGTAAGTACACTGAGGCACGAAAGCGTG  
GGAGC

>ASV:3160:Genus:Ruminococcaceae\_UCG-003  
TACGTAGGTGGCAAGCGTTGTCCGGATTTACTAGGTGTAAAGGGCGTGCAGCCGGGCATGCAAGTCAGATGTGAAATCTC  
AGGGCTTAACCCATAAATTGCTTTCAAACCTGCTGGCCTTGAGTAGTGCATAGGTAGGTGGAATTCCTGTGTAGCGGTG  
AAATGCGTAGATATAAGGAAGAACCAGTGGCGAAGGCGGATTACTGGACGGTAAGTACGCGTGAGGCGCAAAGCGTG  
GGGAG

>ASV:3161:Genus:Subdoligranulum  
AACGTAGGGTGAAGCGTTGTCCGGAATTACTGGGTGTAAAGGGAGCGCAGGCGGATCGGCAAGTTGGAAGTGAAAACCTA  
TGGGCTCAACCCTGAACTGCATTGAAACTGTATGCTTGAATGCCGGAGAGGTAAATCGGAATTCCTGTGTAGCGGTG  
GAATGCGTAGATATCGGAGGAACACCAGTGTGCAAGGCGACCTACTGGCACCAACTGACGCTGAGGCTCGAAAGCATG  
GGTAG

>ASV:3162:Family:Ruminococcaceae  
TACGTAGGTGGCAAGCGTTGTCCGGATTTACTGGGTGTAAAGGGCGTGTAGGCGGGATTGCAAGTCAGGCGTGAAAACCA  
GAGGCTCAACCTCTGGCCTGCGTTGAAACTGCAGTTCTTGAGTACTGGAGAGGTTGGCGGAATTCCTAGTGTAGCGGTG  
AAATGCGTAGATATTAGGAGGAACACCAGTGGCGAAGGCGGCAACTGGACAGCAACTGACGCTGAGGCGCAAAGCGTG  
GGGAG

>ASV:3163:Family:Lachnospiraceae  
TACGTAGGGGGCAAGCGTTATCCGGATTTACTGGGTGTAAAGGGAGCGCAGGCGCATGATGAGTCTGATGTGAAAACCC  
AAGGCTCAACCTCTGGCCTGCGTTGAAACTGTGCTGGAGTGTGCGAGAGGTAAGCGGAATTCCTAGTGTAGCGGTG  
AAATGCGTAGAGATTGGGAGGAACACCAGTGGCGAAGGCGACTAACTGGACTGTAAGTACGCTGAGGCGCAAAGTGTG  
GGGAG

>ASV:3164:Genus:Dielma  
TACGTAGGTGGCAGCGTTATCCGGAATTATTGGGCGTAAAGGGTGCCTAGGCGGGGATTAAGTCTGGAGTAAAATTGT  
GGGGCTCAACCCCATCGAGCTTTGGAAACTGGTGGCTGGAGTGCAGGAGAGGCAGATGGAATTCATGTGTAGCGGTAA  
AATGCGTAGATATATTAGGAGGAACACCAGTGGCGAAGGCGGTCTGCTGGCCTGCAACTGACGCTGAAGCACGAAAGCGTG  
GGAGC

>ASV:3165:Genus:Butyricimonas  
TACGGGGGATGCGAGCGTTATCCGGAATTATTGGGTTAAAGGGCGCGTAGGCGGGACGCCAAGTCAGCGGTAAAAGACT  
GCAGCTAAACTGTAGCACGCCGTTGAAACTGGCGACCTAGAGAGAAGTCGAGGGAGGCGGAACAAGTGAAGTAGCGGTGA  
AATGCATAGATATCATTGGAACCCGATAGCGAAGGCGACTTCCAGCCTTATCTGACGCTGATGCGCGAGAGCGTGG  
GTAGC

>ASV:3166:Genus:Romboutsia  
TACGTAGGGGGCTAGCGTTATCCGGAATTACTGGGCGTAAAGGGTGCCTAGGTGGTTTCTTAAGTCAGAGGTGAAAGGCT  
ACGGCTCAACCGTAGTAAGCCTTTGAAACTGGGAACTTGTAGTGCAGGAGAGGAGAGTGGAAATTTCTAGTGTAGCGGTGA  
AATGCGTAGATATTAGGAGGAACACCAGTGGCGAAGGCGGCTCTCTGGACTGTAAGTACACTGAGGCACGAAAGCGTG  
GGAGC

>ASV:3167:Family:Lachnospiraceae  
TACGTAGGGGGCAAGCGTTATCCGGAATTACTGGGTGTAAAGGGAGTGTAGACGGTCAAGCAAGTCAGAAGTAAAAGGCT  
GGGGCTCAACCCGGGACTGCTTTGAAACTGTTGACTGGAGTGTGGAGAGGTAAGCGGAATTCCTAGTGTAGCGGTG  
AAATGCGTAGATATTAGGAGGAACACCAGTGGCGAAGGCGGCTTACTGGACAGTAACTGACGTTGAGGCTCGAAAGCGTG  
GGGAG

>ASV:3168:Genus:Ruminococcaceae\_UCG-014  
TACATAGGGAGCAAGCGTTATCCGGAATTATTGGGTTAAAGGGTGCCTAGACGGGAAATTAAGTTAGTTGTGAAATCCC  
TTGGCTTAACTGAGGAACTGCAACTAAAACCTGGTTTTCTTGAGTACTGGAGAGGAAAGTGGAAATTCCTAGTGTAGCGGTG  
AAATGCGTAGATATTAGGAGGAACACCAGTGGCGAAGGCGACTTCTGGACAGTTACTGACGTTGAGGCACGAAAGTGTG  
GGGAG

>ASV:3169:Genus:Ruminiclostridium\_9  
TACGTAGGTGGCAAGCGTTATCCGGAATTACTGGGTGTAAAGGGCGTGTAGGCGGGAAAGCAAGTCAGATGTGAAAACCTG  
TGGGCTCAACCACAGCCTGCATTTGAAACTGTTTTCTTGAGTACTGGAGAGGCAGATGGAATTCCTAGTGTAGCGGTG  
AAATGCGTAGATATTAGGAGGAACACCAGTGGCGAAGGCGATCTGCTGGACAGCAACTGACGCTGAGGCGCAAAGTGTG  
GGGAG

>ASV:3170:Order:Bacteroidales  
TACGGAGGATGCGAGCGTTATCCGGAATTATTGGGTTAAAGGGTGCCTAGGTGGTATTAAAGTCAGCGGTGAAAGTTT  
GTGGCTCAACCATAAATTGCCGTTGAAACTGGGTTACTTGAGTGTGTTTGGAGTAGGCGGAATGCGTGGCGTAGCGGTG  
AAATGCGTAGAGATTAGGAAGAACCAGTGGCGAAGGCGACTTCTGGACGAAAACGACGCTGAGGCGCAAAGCGTG  
GGGAG

>ASV:3171:Genus:Christensenellaceae\_R-7\_group  
TACGTAGGGGGCAGCGTTGTTCCGGAATGACTGGGCGTAAAGGGCGCGTAGGCGGCTTTTTAAGTTAGAAGTGGAAAGTCC  
TGCTTTTAAAGTGGGAATTGCTTTTAACTGGAAGGCTTGTAGTGCAGAAGAGGTAAGTGGAAATTCAGTGTAGCGGTG

AAATGCGTAGAGATTGGAAGAACCACAGTGGCGAAGGCGACTTACTGGGCTGTAAGTACGCTGAGGCGCAAAGCGTG  
GGGAG  
>ASV:3172:Genus:Family\_XIII\_AD3011\_group  
TACGTAGGGGGCAAGCGTTATCCGGAATTATTGGGCGTAAAGAGTACGTAGGTGGTTTTCTAAGCACGGGGTTAAGGCA  
ATGGCTTAACCATTGTTCCGCTTGTGAACTGGAAGACTTGAGTGCAGGAGAGAAAGCGGAATTCCTAGTGTAGCGGTGA  
AATGCTTAGATATCACGAAGAACTCCGATTGCGAAGGCGACCTGCTAAGCTGCAACTGACATTGAGGCTCGAAAGTGTG  
GTATC  
>ASV:3173:Family:Lachnospiraceae  
TACGTAGGGGGCGAGCGTTATCCGATTTACTGGGTGTAAGGGAGCGTAGACGGCGTATCAAGTCTGATGTGAAAGCCC  
GGGGCTCAACCCGGTACTGCATTGAAACTGTCGTACTAGAGTGTGCGAGGGGTAAGCGGAATTCCTAGTGTAGCGGTG  
AAATGCGTAGATATTAGGAGGAACACCAGTGGCGAAGGCGGCCTACTGGGCACCAACTGACGCTGAGGCTCGAAAGTGTG  
GGTAG  
>ASV:3174:Genus:Flavonifractor  
TACGTAGGTGGCGAGCGTTATCCGATTTACTGGGTGTAAGGGCGGTAGGCGGGATTGCAAGTCAAGTGTGAAACTA  
TGGGCTCAACCCATAGCCTGCATTTGAAACTGTAGTCTTGAGTGTGAGAGGCAATCGGAATTCCTGTGTAGCGGTG  
AAATGCGTAGATATACGGAGGAACACCAGTGGCGAAGGCGGATTGCTGGACAGTAAGTACGCTGAGGCGCAAAGCGTG  
GGGAG  
>ASV:3175:Genus:Alistipes  
TACGGAGGATCAAGCGTTATCCGGATCTATTGGGTTAAAGGGTGCCTAGGCGGCTTGATAAGTTAGAGGTGAAATCCC  
GGGGCTTAACCCGGAAGTGCCTTAATACTGTTAGACTAGAGAGTAGTTGCGGTAGGCGGAATGTATGGTGTAGCGGTG  
AAATGCTTAGATATCACGAAGAACTCCGATTGCGAAGGCGAGCTACTGGAGTGAAGTACGCTGATGCTCGAAAGTGTG  
GGTAT  
>ASV:3176:Genus:Terrisporobacter  
TACGTAGGGGGCTAGCGTTATCCGATTTACTGGGCGTAAAGGGTGCCTAGGTGGTCTCTTAAGTCAGGAGTAAAAGGCT  
ACGGCTTAACCGTAGTAAGCTCTTGAAGTGGGAGACTTGAGTGCAGGAGAGGAAAGTGAATTCCTAGTGTAGCGGTGA  
AATGCGTAGATATTAGGAGGAACACCAGTAGCGAAGGCGGCTTTCTGGACTGTAAGTACACTGAGGCGCAAAGCGTG  
GGAGC  
>ASV:3177:Family:Ruminococcaceae  
TACGTAGGTGGCAAGCGTTGTCGGATTTACTGGGTGTAAGGGCGGTAGGCGGGAAGATAAGTCAAGCGGTGAAAACCA  
GAGGCTCAACCTCTGGCCTGCTTTGAAACTGTTTTCTTGAGTACTGGAGAGGTTGACGGAATTCCTAGTGTAGCGGTG  
AAATGCGTAGATATTAGGAGGAACACCAGTGGCGAAGGCGGTCAACTGGACAGCAACTGACGCTGAGGCGCAAAGCGTG  
GGGAG  
>ASV:3178:Genus:Butyricicoccus  
TACGTAGGGAGCAAGCGTTATCCGATTTACTGGGTGTAAGGGCGCGCAGGCGGGCGGCAAGTTGGGAGTAAAATCCG  
GGGGCTTAACCCCGAAGTGCCTTCAAAGTCTGCTGAGTGTGAGGAGGCGAGGCGGAATTCCTGTGTAGCGGTG  
AAATGCGTAGATATACGGAGGAACACCAGTGGCGAAGGCGGCTGCTGGACATTAAGTACGCTGAGGCGCAAAGCGTG  
GGGAG  
>ASV:3179:Species:caeni/canadense/detergens/ginsenosidimutans/multivorum/pakistanense/  
siyangense  
TACGGAGGATCCGAGCGTTATCCGATTTATTGGGTTAAAGGGTGCCTAGGCGGCCTATTAAGTCAGGGGTGAAATACG  
GTGGCTCAACCATCGCAGTGCCTTTGATACTGATGGGCTTGAATCCATTTGAAGTGGGCGGAATAAGACAAGTAGCGGTG  
AAATGCATAGATATGCTTAGAACTCCGATTGCGAAGGCGAGCTCACTAAGCTGGTATTGACGCTGATGCACGAAAGCGTG  
GGGAT  
>ASV:3180:Family:Bifidobacteriaceae  
TACGTAGGTGGCGAGCGTTGTCGGATTTATTGGGCGTAAAGGGAACGCAGGCGGTCTTTAAGTCTGATGTGAAAGCCT  
TCGGCTTAACCGAAGTAGTGCATTGGAGACTGGAAGACTTGAGTGCAGAAGAGGAGAGTGGAACTCCATGTGTAACGGTG  
GAATGTGTAGATATCGGAAGAACACCAATGGCGAAGGCGAGTCTCTGGGCCCTCACTGACGCTGAGGAGCGAAAGCGTG  
GGGAG  
>ASV:3181:Family:Lachnospiraceae  
TACGTAGGGGGCAAGCGTTATCCGATTTACTGGGTGTAAGGGAGCGTAGACGGATGGACAAGTCTGATGTGAAAGGCT  
GGGGCTCAACCCGGGACTGCATTGAAACTGCCCGTCTTGAGTACAGTAGAGGTGGGCGGAATTCGTGGTGTAGCGGTG  
AAATGCTTAGACATCACGAAGAACTCCGATTGCGAAGGCGAGCTGCTAAGCTGCAACTGACATTGAGGCTCGAAAGTGTG  
GGTAT  
>ASV:3182:Genus:Parasporobacterium  
TACGTAGGGGGCAAGCGTTATCCGATTTACTGGGTGTAAGGGTGCCTAGGTGGCAAGGCAAGTCAAGTGTGAAAGCCC  
GGGGCTCAACCCGGTACTGCATTTGAAACTGTCTAGCTAGAGTGCAGGAGAGGAGAGTGGAAATTCCTAGTGTAGCGGTG  
AAATGCTTAGATATCACGAAGAACTCCGATTGCGAAGGCGAGCTGCTAAGCTGCAACTGACATTGAGGCTCGAAAGTGTG  
GGTAG  
>ASV:3183:Genus:Cloacibacterium  
TACGGAGGGTGAAGCGTTATCCGATTTATTGGGTTAAAGGGTCCGTAGGCGGACTTATAAGTCAAGTGGTGAAGACT  
GTCGCTTAACGATAGAACTGCCATTTGATACTGAAGTCTTGAGTATATTTGAGTAGCTAGAATAAGTAGTGTAGCGGTG  
AAATGCATAGATATTACTTAGAACACCAATTGCGAAGGCGAGTTACCAAGATATAACTGACGCTGAGGAGCGAAAGCGTG  
GGGAG  
>ASV:3184:Family:Lachnospiraceae  
TACGTATGGGGCAAGCGTTATCCGATTTACTGGGTGTAAGGGAGCGTAGGCGGCATGGCAAGTCAAGTGAAGGCT  
GGGGCTCAACCCCGAATTGCTTTTGAAGTGTGAGGCTAGAGTGTGCGAGGGGTAAGCGGAATTTCTAGTGTAGCGGTG  
AAATGCGTAGATATTAGGAGGAACCCGGTGGCGAAGGCGGCTTACTGGACGATTACTGACGCTGATGCTCGAAAGTGTG  
GGTAT

>ASV:3185:Genus:Ruminococcaceae\_UCG-013  
TACGTAGGTGGCGAGCGTTGTCCGGATTTACTGGGTGTAAGGGCGTGTAGGCGGGCTTGAAGTCAGATGTGAAATACC  
GGGGCTTAACCCGGAGCTGCATTTGAAACTGTAGGCTTTGAGTATCGGAGAGGAAAGCGGAATTCCTAGTGTAGCGGTG  
AAATGCGTAGATATTAGGAGGAACACCAGTGGCGAAGGCGGCTTTCTGGACGAAAACGACGCTGAGGCGCAAAGCATG  
GGGAG

>ASV:3186:Family:Ruminococcaceae  
TACGTAGGGAGCGAGCGTTGTCCGGATTTACTGGGTGTAAGGGTGCCTAGGCGGGCTGTCAAGTCAGATGTGAAATACC  
GGAGCTCAACTCCGGGGCTGCATTTGAAACTGTAGGCTTTGAGTGAAGTAGAGGCAGGCGGAATTCCTAGTGTAGCGGTG  
AAATGCGTAGATATTAGGAGGAACATCAGTGGCGAAGGCGGCTTACTGGGCTTTAACTGACGCTGAGGCTCGAAAGCGTG  
GGGAG

>ASV:3187:Genus:Parabacteroides  
TACGGAGGATCCGAGCGTTATCCGGATTTATTGGGTTTAAAGGGTGTGTAGGCGGCTTTTAAAGTCAGCGGTGAAAGTCT  
GTGGCTCAACCATAGAAATTGCCGTTGAAACTGGGGGCTTGTAGTATGTTTGAAGCAGGCGGAATGCGTGGTGTAGCGGTG  
AAATGCTTAGATATTAGGAGGAACATCAGTGGCGAAGGCGGCTTACTGGGCTTTAACTGACGCTGAGGCTCGAAAGCGTG  
GGGAG

>ASV:3188:Family:Ruminococcaceae  
TACGTAGGGGCAAGCGTTATCCGGATTTACTGGGTGTAAGGGCGTGTAGCCGGGAAGCAAGTCAGATGTGAAATCCA  
CGGGCTCAACCCATAAACTGCATTTGAAACTGTAGAGCTTGTAGTGAAGTAGAGGCAGGCGGAATTCCTAGTGTAGCGGTG  
AAATGCGTAGATATTAGGAGGAACACCAGTGGCGAAGGCGGCTTACTGGACGATAACTGACGCTGAGGCTCGAAAGCGTG  
GGGAG

>ASV:3189:Class:Bacteroidia  
TACGTAGGATCCGAGCGTTATCCGGATTTATTGGGTTTAAAGGGAGCGTAGATGGGTTGTTAATCAGTTGTGAAAGTTTG  
CGGCTCAACCGTAAAATTGCAATTGACTGCAGTCTTGTAGTACAGTTGAGGTAGGCGGAATTCCTAGTGTAGCGGTGG  
AATGCGTAGATATTAGGAGGAACACCAGTGGCGAAGGCGGCTTACTGGGCACCAACTGACGCTGAGGCTCGAAAGTGTGG  
GTAGC

>ASV:3190:Genus:Faecalitalea  
TACGTAGGTGGCAAGCGTTATCCGAATGATTGGGCGTAAAGGGTGCCTAGGTGGTACATTAAGTCTGAAGTAAAAGGCA  
GCAGCTCAACCGTAAAATTGCAATTGAACTGGTGAACGTAGAGTGCAGGAGAGGGCGATGGAATTCATGTGTAGCGGTAA  
AATGCGTAGATATTAGGAGGAACACCAGTGGCGAAGGCGGCTGCCTGGCCTGTAAGTACACTGAGGACGAAAGCGTGG  
GGAGC

>ASV:3191:Order:Bacteroidales  
TACGTAGGGGCAAGCGTTATCCGGATTTATTGGGTTTAAAGGGAGCGTAGGTGGATTGTTAAGTCAAGTGTGAAAGTTT  
GCGGCTCAACCGTAAAATTGCAAGTTGATACTGGCAGTCTTGTAGTACAGTAGAGGTGGGCGGAATTCCTAGTGTAGCGGTG  
AAATGCGTAGATATTAGGAGGAACATCAGTGGCGAAGGCGGCTTACTGGACTGAAACTGACACTGAGGACGAAAGCGTG  
GGGAG

>ASV:3192:Genus:Ruminococcus\_1  
TACGTAGGGAGCAAGCGTTATCCGGAATTTACTGGGTGTAAGGGAGTGTAGGCGGGACTGCAAGTCAGATGTGAAAATTA  
TGGGCTCAACTCATAAAGTGCATTTGAAACTGTAGTCTTGTAGTGAAGTAGAGGTAAGCGGAATTCCTAGTGTAGCGGTG  
AAATGCGTAGATATTAGGAGGAACATCAGTGGCGAAGGCGGCTTACTGGGCTTTTACTGACGCTGAGGCTCGAAAGCGTG  
GGGAG

>ASV:3193:Family:Lachnospiraceae  
TACGGAGGATCCGAGCGTTATCCGGATTTACTGGGTGTAAGGATGCGTAGGTGGCAAGGCAAGTCTGAAGTAAAATCC  
GGGGCTCAACCCGGAAGTGTGTTGAAACTGTTAGCTAGAGTACAGGAGAGGTAAGTGAATTCCTAGTGTAGCGGTG  
AAATGCTTAGATATCACGAAGAACTCCGATTGCGAAGGCAGCTCACTAGACTGCAACTGACACTGATGCTCGAAAGTGTG  
GGTAT

>ASV:3194:Family:Lachnospiraceae  
TACGTAGGGGCAAGCGTTATCCGGATTTACTGGGTGTAAGGGTGCCTAGGTGGTATGGCAAGTCAAGTGAAGGCT  
GGGGCTCAACCCGGGACTGCTTTGAAACTGTAACTAGAGTACAGGAGAGGAAAGCGGAATTCCTAGTGTAGCGGTG  
AAATGCTTAGATATCACGAAGAACTCCGATTGCGAAGGCAGCTCACTGGAGTGAAGTACGCTGATGCTCGAAAGTGTG  
GGTAT

>ASV:3195:Order:Bacteroidales  
TACGGAGGATCCGAGCGTTATCCGGATTTATTGGGTTTAAAGGGAGCGTAGGTGGACAGTTAAGTCAAGTGTGAAAGTTT  
GCGGCTCAACCGTAAAATTGCAAGTTGAAACTGTTATTTCTTGTAGTGGAGTAGAGGCAAGCGGAATTCCTAGTGTAGCGGTG  
AAATGCGTAGATATTAGGAGGAACACCAGTGGCGAAGGCGGCTTGTGGGCTTAACTGACACTGATGCTCGAAAGTGTG  
GGTAT

>ASV:3196:Family:Lachnospiraceae  
TACGTATGGAGCAAGCGTTATCCGGATTTACTGGGTGTAAGGGAGCGTAGGCGGTCTTATAAGTCTGATGTGAAAGGCC  
GGGGCTTAACCCGGGACTGCTTTGAAACTGTAGGACTAGAGTGCAGAGGTAGGTGGAATTCCTAGTGTAGCGGTGAA  
TGCGTAGATATCGGGAGGAACACCAGTGGCGAAGGCAGCTACTGGGCACCAACTGACGCTGAGGCTCGAAAGCATGGT  
AGCAA

>ASV:3197:Kingdom:Bacteria  
TACGGAGGATCCGAGCGTTATCCGGATTTATTGGGTTTAAAGGGTGCCTAGGCGGTGCGGCAAGTCTGATGTGAAAGGCC  
GGGGCTCAACCCGGTACTGCATTTGAAACTGTGCTACTAGAGTGTGCGAGGGGTAAGCGGAATTCCTAGTGTAGCGGTG  
AAATGCTTAGATATCACGAAGAACTCCGATTGCGAAGGCAGCTGCTAAGTCAACTGACATTTAGGCTCGAAAGTGTG  
GGTAT

>ASV:3198:Family:Lachnospiraceae  
TACGGAGGATCCGAGCGTTATCCGGATTTACTGGGTGTAAGGGAGCGTAGACGGACTGGCAAGTCTGATGTGAAAGGCC  
GGGGCTCAACCCCTGGACTGCATTTGAAACTGTTAGTCTTGTAGTGCAGAGGTAAGCGGAATTCCTAGTGTAGCGGTG

AAATGCGTAGATATTAGGAGGAACACCAGTGGCGAAGGCGGCTTGTGGACTGTAAGTACTGACACTGAGGCTCGAAAGCGTG  
GGGAG  
>ASV:3199:Genus:Subdoligranulum  
TACGTAGGGAGCGAGCGTTGTCCGGAATTAAGGGTGTAAAGGGAGCGCAGGCGGACCGCAAGTTGGAAGTAAAACCTA  
TGGGCTCAACCCATAAATTGCTTTCAAAGTCTGGCCTTGGAGTAGTGCAGAGGTAGTGGAATTCCTAGTGTAGCGGTG  
GAATGCGTAGATATCGGGAAGAACACCAGTGGCGAAGGCGGCTTGTGGACTGTTACTGACACTGAGGCACGAAAGCGTG  
GGGAG  
>ASV:3200:Genus:Anaerofustis  
TACGTAGGGGCAAGCGTTGTCCGGAATTAAGGGTGTAAAGGGAGCGCAGGCGGTAAGATAAGTCAAGTGTGAAAGTTT  
TCAGCTTAAGTGAAGTGCATTTGAAACTATCCTACTTGGAGTAGTCTCGGAGAGGTAAAGCGGAATTCCTAGTGTAGCGGTG  
AAATGCGTAGAGATTAGGAGGAACACCAGTGGCGAAGGCGGCTTACTGGACGAGTACTGACGCTCATGTGCGAAAGCGTG  
GGGAG  
>ASV:3201:Genus:Lachnospiraceae\_UCG-001  
TACGTAGGGGCAAGCGTTATCCGGAATTAAGGGTGTAAAGGGAGCGCAGGCGGTAAGTCAAGTGTGAAAGTTT  
GGGCTCAACCCCGGACTGCATTTGAAACTGTCGGACTAGAGTGCAGGAGGTAAAGTGAATTCCTAGTGTAGCGGTG  
AAATGCGTAGATATTAGGAGGAACACCAGTGGCGAAGGCGGCTTACTGGACGTAAGTACTGACGCTGAGGCTCGAAAGCGTG  
GGGAG  
>ASV:3202:Kingdom:Bacteria  
AACGTAGGTCACAAGCGTTGTCCGGAATTAAGGGTGTAAAGGGAGCGCAGGCGGGGATCAAGTTGGAAGTAAATCCA  
TGGGCTCAACCCATGAAGTGCATTTCAAAGTGTGCTTGGAGTAGTGCAGGAGGTAGGCGGAATGTATGGTGTAGCGGTG  
AAATGCTTAGAGATCATAACAGAACCCGATTGCGAAGGCGAGCTTACCAAATATATCTGACGTTGAGGCACGAAAGCGTG  
GGGAG  
>ASV:3203:Class:Bacteroidia  
TACGGAGGATCCGAGCGTTATCCGGAATTAAGGGTGTAAAGGGAGCGTAGGCGGACGCTTAAGTCAAGTGTGAAAGTTT  
GCGGCTCAACCGTAAATGCAAGTGTACTGGTGTCTTGGAGTGCAGGAGGTAAAGCGGAATTCCTAGTGTAGCGGTG  
AAATGCGTAGAGATCTGGAGGAATACCGTGGCGAAGGCGGCCCCCTGGACGAAGACTGACGCTCAGGTGCGAAAGCGTG  
GGGAG  
>ASV:3204:Genus:Ruminococcus\_2  
TACGTAGGGAGCAAGCGTTATCCGGAATTAAGGGTGTAAAGGGAGCGTAGACGGATGGACAAGTCTGATGTGAAAGGCT  
GGGGCTCAACCCATAAAGTGCATTTGAAACTGTAGAGCTTGGAGTGAAGTAGAGGCGAGGCGGAATTCCTAGTGTAGCGGTG  
AAATGCGTAGAGATGGGAGGAACACCAGTGGCGAAGGCGGCTTGTGGCTTAACTGACGCTGAGGCACGAAAGCGTG  
GGTAG  
>ASV:3205:Genus:Anoxybacillus  
TACGTAGGTGGTAAGCGTTGTCCGGAATTAAGGGTGTAAAGGGAGCGCAGGCGGCTTAAAGTCTGATGTGAAAGCCC  
ACGGCTCAACCGTGGAGGGTCAATGGAAGTGGGGGACTTGGAGTGCAGAAAGGAGAGCGGAATTCACGTTAGCGGTG  
AAATGCGTAGAGATGTGGAGGAACACCAGTGGCGAAGGCGGCTTCTGGTCTGTAAGTACTGACGCTGAGGCAGGAAAGCGTG  
GGGAG  
>ASV:3206:Family:Lachnospiraceae  
TACGGAGGATCAAGCGTTATCCGGAATTAAGGGTGTAAAGGGTGCAGGCGGTTTATAAGTTAGAGGTGAAATACC  
GGGGCTCAACCCCGTACTGCATTTGAAACTGTCGTAAGTGTGCGAGGGGTAAGCGGAATTCCTAGTGTAGCGGTG  
AAATGCGTAGATATTAGGAGGAATACAGTGGCGAAGGCGGCTTACTGGACGATAACTGACGCTGAGGCTCGGAAGCGTG  
GGGAG  
>ASV:3207:Family:Lachnospiraceae  
TACGTATGGTCAAGCGTTATCCGGAATTAAGGGTGTAAAGGGAGCGTAGACGGCACGGCAAGCCAGATGTGAAAGCCC  
GGGGCTCAACCCCGGACTGCATTTGAAACTGCTGAGCTAGAGTGTGCGAGAGGCAAGTGAATTCCTAGTGTAGCGGTG  
AAATGCGTAGATATCGGGAAGAACCAATGGCGAAGGCGGCTTCTGGCCGCTACTGACGCTGAGGAGCGAAAGCGTG  
GGGAG  
>ASV:3208:Kingdom:Bacteria  
TACGTAGGGTCAAGCGTTATCCGGAATTAAGGGTGTAAAGGGAGCGCAGGCGGGACTGCAAGTTGGATGTGAAATACC  
GTGGCTTAACCCGAACTGCATCCAAACTGTAGTTCTTGGAGTGAAGTAGAGGCAAGCGGAATTCCTAGTGTAGCGGTG  
AAATGCTTAGATATCACGAAGAATCCGATTGCGAAGGCGAGTCACTAGACTGTTACTGACACTGATGCTCGAAAGTGTG  
GGTAT  
>ASV:3209:Family:Lachnospiraceae  
TACGTAGGGGCAAGCGTTATCCGGAATTAAGGGTGTAAAGGGAGCGTAGACGGCACGGCAAGCCAGATGTGAAAGCCC  
GGGGCCCAACCCCGGACTGCATTTGAAACTGCTGAGCTAGAGTGTGCGAGAGGCAAGTGAATTCCTAGTGTAGCGGTG  
AAATGCATAGATATCACGAAGAATCCGATTGCGAAGGCGAGTCTGCTGGACTGTAAGTACTGACGCTGATGCTCGAAAGTGTG  
GGTAT  
>ASV:3210:Family:Erysipelotrichaceae  
TACGTAGGTGGCAAGCGTTATCCGGAATTAAGGGTGTAAAGGGTGCAGGAGGCGTACTAAGTCTGTAGTAAAAGGCA  
ATGGCTCAACCATTTGAAGTGTGAAACTGGTAAGTGCAGAAAGAGGGCGATGGAATTCATGTGTAGCGGTAA  
AATGCGTAGATATATGAGGAACACCAGTGGCGAAGGCGGCTGCCTGGTCTGTAAGTACTGACACTGAGGCACGAAAGCGTG  
GGAGC  
>ASV:3211:Genus:Alistipes  
TACGGAGGATCAAGCGTTATCCGGAATTAAGGGTGTAAAGGGTGCAGGCGGTTTATAAGTTAGAGGTGAAATGTC  
GGGGCTCAACCTGAAACTGCCTTAATACTGTTGGGCTAGAGAGTGTGCGGTAGGCGGAATGTATGGTGTAGCGGTG  
AAATGCTTAGAGATCATAACAGAACCCGATTGCGAAGGCGAGTCACTAACTATATCTGACGTTGAGGCACGAAAGCGTG  
GGGAG  
>ASV:3212:Family:Lachnospiraceae

TACGTAGGGGGCAAGCGTTATCCGGATTTACTGGGTGTAAAGGGAGCGTAGACGGCGCAGCAAGTCTGATGTGAAAAGGCA  
GGGGCTTAACCCCTGGACTGCATTGAAAAGTCTGTGCTTGGAGTCCGGAGGGGTAAGCGGAATTCCTAGTGTAGCGGTG  
AAATGCATAGGTATCACGCAGAAGTCCGATTGCGAAGGCAGCTTACTAAACCATAACTGACACTGAAGCACGAAAGCGTG  
GGGAT

>ASV:3213:Genus:Bifidobacterium

TACGGAGGATGCGAGCGTTATCCGGATTTATTGGGTTTAAAGGGTGCCTAGGTGGTGAATTAAGTCAAGTGGTAAAAGTCC  
ATCGCTTAACGGTGGATCTGCGCCGGGTACGGGCGGGCTGGAGTGCCTAGGGGAGACTGGAATTCCTGGTGTAAACGGTG  
GAATGTGTAGATATCGGAAGAACACCAATGGCGAAGGCAGGTCTCTGGGCCGTTACTGACGCTGAGGAGCGAAAGCGTG  
GGGAG

>ASV:3214:Genus:Parabacteroides

TACGGAGGATGCGAGCGTTATCCGGATTTATTGGGTTTAAAGGGTGCCTAGGTGGTTAATTAAGTCAAGCGGTAAAAGTTT  
GTGGCTCAACCATAAAGTTGCCGTTGAAAAGTGGTTGACTTGGATATATTTGAGGTAGGCGGAATGCGTGGTGTAGCGGATG  
AAATGCTTAGATATCACGAAGAAGTCCGATTGCGAAGGCAGCTCACTAGACTGTTACTGACACTGATGCTCGAAAGTGTG  
GGTAT

>ASV:3215:Genus:Sphingomonas

TACGGAGGGAGCTAGCGTTTGTTCGGAATTACTGGGCGTAAAGCGCACGTAGGCGGCTTTGTAAGTCAAGGGTAAAAGCCT  
GGAGCTCAACTCCAGAAGTGCCTTTGAGACTGCATCGCTTGAATTCGGGAGAGGTGAGTGGAAATTCAGAGTGTAGAGGTG  
AAATTCGTAGATATTCGGAAGAACACCAAGTGGCGAAGGCAGGCTCACTGGACCGGTATTGACGCTGAGGTGCGAAAGCGTG  
GGGAG

>ASV:3216:Genus:Anaerostipes

TACGTAGGGGGCAAGCGTTATCCGGATTTACTGGGTGTAAAGGGTGCCTAGGTGGCAGGGCAAGTCAAGAAGTAAAACCC  
GGGGCTCAACTCCGGGACTGCTTTTAAAAGTGTCCAGCTAGAGTGCAGGAGAGGTGAGTGGAAATTCCTAGTGTAGCGGTG  
AAATGCGTAGATATTAGGAGGAACACTAGTGGCGAAGGCAGGCTTACTGGACTGAAAAGTCAACTGACACTGAGGCACGAAAGCGTG  
GGGAG

>ASV:3217:Order:Bacteroidales

TACGGAGGGTGAAGCGTTAATCCGGAATTACTGGGTTTAAAGGGAGCGTAGATGGATGTTTAAAGTCAAGTGTGAAAAGTTT  
GCGGCTCAACCGTAAAATTGCAAGTGTGACTGGATATCTTGGAGTGCAGTTGAGGCAGGCGGAATTCCTGGTGTAGCGGTG  
AAATGCTTAGATATCGAGAGGAACACTCGTGGCGAAGGCAGGCTTCTGGACTTAACTGACGCTGAGGCACGAAAGCCAG  
GGGAG

>ASV:3218:Genus:GCA-900066225

TACGTAGGTGGCAAGCGTTGTCCGGAATTACTGGGTGTAAAGGGAGCGTAGGCGGGTCTGCAAGTTGAATGTGAAATCTA  
CGGGCTTAACCCGTAAGTGCCTTCAAAAAGTGTAGATCTTGGAGTGAAGTGAAGGAGGAGGTAAGCGGAATTCCTAGTGTAGCGGTG  
AATGCGTAAATATTAGGAGGAACACCAAGTGGCGAAGGCAGGCTTCTGGACTTAACTGACGCTGAGGCTCGAAAGCGTGG  
GTAGC

>ASV:3219:Species:sanguinegens

TACGTATGTCGCGAGCGTTATCCGGAATTATTGGGCTTAAAGGGCATCTAGGCGGTTAAACAAGTTGAAGGTGAAAACCT  
GTGGCTCAACCGATAGCTTGCATTCGAAACTGTATAACTAGACTGAAAGGTGGGTGAAACTACAGAGTAAAGGTG  
AAATTCGTAGATATGTGTAGGAATGCCGATGATGAAGATAACTCACTGGACAGCAACTGACGCTGAAGTGCAGAAAGCTAG  
GGGAG

>ASV:3220:Genus:Mogibacterium

TACGTAGGGGGCAAGCGTTATCCGGAATTATTGGGCGTAAAGCGTGCCTAGGTGGTGAATTTAAGCGCAAGGTTTAAACTA  
ACGGCTCAACCGTAAATTGCAATTCGAAACTGGGTTACTTGGAGTGCAGGAGGGAAAGCGGAATTCCTAGTGTAGCGGTG  
AATGCGTAGATATTAGGAGGAACACCGGCGGCGAAGGCAGGCTTCTGGACAGCAACTGACACTGAGGCACGAAAGTGTGG  
GTAGC

>ASV:3221:Family:Ruminococcaceae

TACGTAGGTGGCAAGCGTTGTCCGGAATTACTGGGTGTAAAGGGAGCGTAGGCGGGAATGCAAGTCCGATGTGAAAACCTA  
TTGGCTTAACCGATAGCTTGCATTCGAAACTGGGTTACTTGGAGTGAAGTGAAGGTTGGCGGAATTCCTGGTGTAGCGGTG  
AAATGCGTAGATATCGGAGGAACACCAAGTGGCGAAGGCAGGCTTCTGGACTGTAAGTGCAGCTGAGGCTCGAAAGCATG  
GGGAG

>ASV:3222:Genus:Lachnospiraceae\_NK4A136\_group

TACGTAGGGGGCAAGCGTTACCCGATTTACTGGGTGTAAAGGGAGCGTAGACGGCGACGCAAGTCTGGAGTAAAAGCCC  
GGGGCCCAACCCGGGACTGCTTTGAAAAGTGTGCTGCTGGAGTGCAGGAGAGGTAAGTGGAAATTCCTAGTGTAGCGGTG  
AAATGCGTAGATATTAGGAGGAACACCAAGTGGCGAAGGCAGGCTTACTGGACTGTAAGTGCAGCTGAGGCTCGAAAGCGTG  
GGGAG

>ASV:3223:Family:Family\_XIIII

TACGTAGGGGGCAAGCGTTATCCGGAATTATTGGGCGTAAAGGGTACGTAGGTGGTCTCTTAAAGCGCAGGGTATAAGGCA  
ATGGCTTAACCGATTTGCTTGCATTCGAAACTGGGGACTTGGAGTGCAGGAGAGGAAAGCGGAATTCCTAGTGTAGCGGTG  
AATGCGTAGATATTAGGAGGAACACCAAGTGGCGAAGGCAGGCTTCTGGACTGTAAGTGCAGCTGAGGTACGAAAGCGTGG  
GGAGC

>ASV:3224:Family:Lachnospiraceae

TACGTAGGGGGCAAGCGTTATCCGGAATTACTGGGTGTAAAGGGAGCGTAGACGGACTGGCAAGTCTGATGTGAAAAGCCC  
GGGGCTCAACCCGGTACTGTTGAAAAGTGTGCTACTAGAGTGTGGAGGGGTAAGCGGAATTCCTAGTGTAGCGGTG  
AAATGCGTAGATATTAGGAGGAACACCAAGTGGCGAAGGCAGTAACTGGACTGTAAGTGCAGCTGAGGCGGAAAGTGTG  
GGGAG

>ASV:3225:Genus:Christensenellaceae\_R-7\_group

TACGTAGGGGGCAAGCGTTGTCCGGAATAATTGGGCGTAAAGGGCGCGTAGGCGGCTCGGTAAGTCTGGAGTAAAAGTCC  
TGCTTTTAAAGGTGGGAATGCTTTGGATACTGTGGGCTTGGAGTGCAGGAGAGGTTAGTGGAAATTCCTGGTGTAGCGGTG  
AAATGCTTAGATATCACGAAGAAGTCCGATTGCGAAGGCAGCTGCTAAGCTGCAACTGACATTGAGGCTCGAAAGCGTG

GGTAG  
>ASV:3226:Order:Bacteroidales  
TACGTAGGGGGCAAGCGTTATCCGGATTTACTGGGTGTAAGGGAGCGTAGACGGACTGGCAAGTCTGATGTGAAAGGCC  
GGGGCTCAACCCCGGACTGCATTGGAACTGTTAGTCTTGTAGTACAGTAGAGGTGGCGGAATTCGTGGTGTAGCGGTG  
AAATGCTTAGATATCACGAAGAACTCCGATTGCGAAGGCAGCTTGTGGACTGTAACGACGCTGATGCTCGAAAGTGTG  
GGTAT  
>ASV:3227:Genus:Mycobacterium  
TACGTAGGGTGCAGCGTTGTCCGGAATTACTGGGCGTAAAGAGCTCGTAGGTGGTTTGTCCGCTTGTTCGTGAAAACCG  
AAGGCTTAACCTTTGGCGTGCGGGCGATACGGGCAGACTGGAGTACTGCAGGGGAGACTGGAATTCCTGGTGTAGCGGTG  
GAATGCGCAGATATCAGGAGGAACACCGGTGGCGAAGGCGGCTCTGGGCAGTAACGACGCTGAGGAGCGAAAGCGTG  
GGGAG  
>ASV:3228:Family:Lachnospiraceae  
TACGTAGGGGGCAAGCGTTATCCGGATTTACTGGGTGTAAGGGAGCGTAGGTGGTACTGCAAGTCAGAAGTAAAAGCCC  
CGTGCTTAACGTGGGGACTGCTTTTAAAAGTGTCCGACTAGAGTGCAGGAGAGGTAAGTGAATTCCTAGTGTAGCGGTG  
AAATGCGTAGATATTAGGAGGAACACCAAGTGGCGAAGGCGGCTTACTGGACGTAACGACGCTGAGGCTCGAAAGCGTG  
GGGAG  
>ASV:3229:Genus:Christensenellaceae\_R-7\_group  
TACGTAGGGGGCGAGCGTTGTCCGGAATGACTGGGCGTAAAGGGCGCTAGGCGGCTTTTAAAGTTAGAAGTGAAGTCC  
TGCTTTTAAAGTGGGAATTGCTTTTAAACTGGAAGGCTTGTAGTGCAGAAGAGGTAAGTGAATTCCTAGTGTAGCGGTG  
AAATGCGTAGAGATTGGGAAGAACACCAAGTGGCGAAGGCGACTTACTGGCTGTAACGACGCTGAGGCGCGAAAGCGTG  
GGGAG  
>ASV:3230:Family:Clostridiales\_vadinBB60\_group  
TACGTAGGTAGCAAGCGTTGTCCGGAATGACTGGGCGTAAAGGGTGCCTAGGTGGTTTAAACAAGTTGGTAGTAAAATCC  
GAAGCTTAACCTCGGCGCTACTGCCAAGACTGTTGAACCTTGTAGTACAGGAGAGGTAAGTGAATTCCTAGTGTAGCGGTG  
GAATGCGTAGATATTAGGAGGAACACCAAGTGGCGAAGGCGACTTACTGGCTGCAACGACACTGAGGCACGAAAGCGTG  
GGGAG  
>ASV:3231:Genus:Ruminococcaceae\_UCG-010  
TACGTAGGTGGCGAGCGTTATCCGGATTTACTGGGTGTAAGGGTGTGTAGGCGGGATTGCAAGTCAGATGTAAAATCC  
GAGGCTCAACTTCGGAAGTGCATTTGAACTGTAATCTTGTAGAGTGGGAGAGGTAAGCGGAATTCCTGGTGTAGCGGTG  
AAATGCGTAGATATCGGGAGGAACACCAAGTGGCGAAGGCGGCTTACTGGACCTTACTGACGCTGAGACACGAAAGCGTG  
GGGAG  
>ASV:3232:Genus:Paraprevotella  
TACGTAGGGAGCGAGCGTTGTCCGGAATGACTGGGTGTAAGGGAGCGTAGGCGGGCTTTAAGTCAGCGGTCAAATGCC  
ACGGCTCAACCGTGGCCAGCCGTTGAACTGCAAGCCTTGTAGTCTGCACAGGGCACATGGAATTCGTGGTGTAGCGGTGA  
AATGCTTAGATATCGGGAGGAACACCAAGTGGCGAAGGCGGCTTACTGGCCACCAACTGACGCTGAGGCTCGAAAGTGTGG  
GTAGC  
>ASV:3233:Genus:Bradyrhizobium  
TACGAGGGGGCTAGCGTTGTCCGGAATGACTGGGCGTAAAGGGTGCCTAGGCGGGCTTTAAGTCAGGGGTGAAATCCT  
GGAGCTCAACTCCAGAAGTGCCTTTGATACTGAAGATCTTGTAGTTCGGGAGAGGTGAGTGAAGTGCAGTGTAGAGGTG  
AAATTCGTAGATATTGCAAGAACACCAAGTGGCGAAGGCGGCTTACTGGCCGATACTGACGCTGAGGCACGAAAGCGTG  
GGGAG  
>ASV:3234:Species:crustorum/farciminis/formosensis/heilongjiangensis/kimchiensis/mindensis/  
nantensis/paralimentarius  
TACGTAGGTGGCAAGCGTTGTCCGGATTTATTGGGCGTAAAGAGAATGTAGGCGGTTTATTAAGTTTGAAGTAAAAGCCC  
TCGGCTCAACCCGAGGAGTGTTCGAAAAGTGGTAACTTGTAGTGCAGAAGAGGAAAGTGAAGTCCATGTGTAGCGGTG  
GAATGCGTAGATATATGGAAGAACACCAAGTGGCGAAGGCGGCTTCTGGTCTGTAACGACGCTGAGATTGAAAGCATG  
GGTAG  
>ASV:3235:Genus:Cloacibacillus  
TACGTAGGGGGCGAGCGTTGTCCGGAATGACTGGGCGTAAAGCGCACGAGGCGAACAGTAAGTCTGTCTGCAAAAGCGG  
GAGGCTCAACCTTCGTTCCACGATAGATACTGCGGCTTAGAGTATGTGAGAGGGAAGTGAATTCCTAGTGTAGCGGTG  
AAATGCGTAGATATTAGGAGGAACACCAAGTGGCGAAGGCGGCTGCTGGACGACAACGACGCTGAGGCGCGAAAGCGTG  
GGGAG  
>ASV:3236:Genus:Agathobacter  
TACGTAGGTGGCAAGCGTTATCCGGATTTACTGGGTGTAAGGGAGCGCAGGCGGTGCGGAAGTCTGATGTGAAAGCCC  
GGGGCTCAACCCCGTACTGCATTGAAAAGTGTCTGACTAGAGTGTCCGAGGGGTAAGCGGAATTCCTAGTGTAGCGGTG  
AAATGCGTAGATATTAGGAGGAACACCAAGTGGCGAAGGCGGCTTCTGGCACACAACGACGCTCATGTGCGAAAGCCAG  
GGCAG  
>ASV:3237:Order:Bacteroidales  
TACGGAGGATCCGAGCGTATCCGGATTTATTGGGTTTAAAGGGAGCGTAGATGGATGTTTAAAGTCAGTTGTGAAAGTTT  
GCGGCTCAACCGTAAAATTGCAAGTGTACTGGATGTCTTGTAGTGCAGTTGAGGCAGGCGGAATTCCTGGTGTAGCGGTG  
GAATGCGTAGATATCGGGAGGAACACCAAGTGGCGAAGGCGGCTGCTGGACATTAACGACGCTGAGGCGCGAAAGCGTG  
GGGAG  
>ASV:3238:Order:Bacteroidales  
TACGGAGGATCCGAGCGTATCCGGATTTATTGGGTTTAAAGGGAGCGTAGGCGGGTTGTTAAGTCAGTTGTGAAAGTTT  
GCGGCTCAGCTGAAAATTGCAAGTGTACTGGGACCTTGTAGTGCACAGAGGTAGGCGGAATTCGTGGTGTAGCGGTG  
AAATGCGTAGATATACGGAGGAACACCAAGTGGCGAAGGCGGCTGCTGGACATTAACGACGCTGAGGCGCGAAAGCGTG  
GGGAG  
>ASV:3239:Family:Lachnospiraceae

TACGTAGGGGGCAAGCGTTATCCGGATTTACTGGGTGTAAAGGGAGCGTAGACGGCGCAGCAAGTCTGATGTGAAAGGCA  
GGGGCTTAACCCCTGGACTGCATTGAAAAGTCTGTGCTTGGAGTCCCGAGGGGTAAGCGGAATTCCTAGCGTAGCGGTG  
AAATGCGTAGATATCACGAAGAAGTCCGATTGCGAAGGCAGCTGCTAAGCTGCAACTGACATTGAGGCTCGAAAGTGTG  
GGTAT

>ASV:3240:Genus:Ruminococcaceae\_UCG-002

TACGTAGGTGGCAAGCGTTGTCCGGATTTACTGGGTGTAAAGGGAGCGCAGGCGGAGCAAGTCAGATGTGAAATCCA  
TGGGCTTAACCCATGAACTGCATTTGAAAAGTGTCTTCTTGGAGTACTGGAGAGGCAATCGGAATTCCTAGTGTAGCGGTG  
AAATGCGTAGATATTAGGAGGAACACCAGTGGCGAAGGCGGATTGCTGGACAGCAACTGACGGTGAGGCGCGAAAGTGTG  
GGGAG

>ASV:3241:Genus:Roseburia

TACGTATGGTGAAGCGTTATCCGGATTTACTGGGTGTAAAGGGAGCGCAGGCGGAAGGCTAAGTCTGATGTGAAAGCCC  
GGGGCTCAACCCCGTACTGCATTGAAAAGTGGTCATCTAGAGTGTCCGGAGGGGTAAGTGGAAATTCCTAGTGTAGCGGTG  
AAATGCGTAGATATCACGAAGAAGTCCGATTGCGAAGGCAGCTGCCAGACCAGCAACTGACGTTTCATGCTCGAAAGTGGC  
GGTAT

>ASV:3242:Genus:Anaerostipes

TACGTAGGTGGCAAGCGTTGTCCGGAAATTTACTGGGTGTAAAGGGTGGTAGGTGGTATGGCAAGTCAGAAGTAAAACCC  
AGGGCTTAACCTGCGACTGCTTTTAAAAGTGCAGACTGGAGTGCAGGAGAGGTAAGCGGAATTCCTAGTGTAGCGGTG  
AAATGCGTAGAGATCAGGAGGAACACCAGTGGCGAAGGCGGCTTACTGGACTGTAACGACGCTGAGGCTCGAAAGTGTG  
GGTAG

>ASV:3243:Species:disporicum

TACGTAGGTGGCAAGCGTTGTCCGGATTTACTGGGCGTAAAGGGAGCGTAGGCGGATTTTAAAGTGAAGTGTGAAATACC  
CGGGCTTAACCTGGGTGCTGCATTTCAAAGTCTAGAGTGCAGGAGAGGAGAAGGGAATTCCTAGTGTAGCGGTG  
AAATGCGTAGAGATTAGGAAGAACACCAGTGGCGAAGGCGCTTCTCTGGACTGTAACGACGCTGAGGCTCGAAAGCGTG  
GGGAG

>ASV:3244:Genus:Butyricicoccus

TACGTAGGGAGCAAGCGTTATCCGGATTTACTGGGTGTAAAGGGCGCGCAGGCGGGCCGTAAGTTGGAAGTAAAATCCC  
GGGGCTTAACCCGGAAGTGCATTTCAAAGTCTGAGTGTGGAGAGGCGAGGCGGAATTCCTGTGTAGCGGTG  
AAATGCGTAGATATACGGAGGAACACCAGTGGCGAAGGCGGCTGCTGGACATTAACGACGCTGAGGCGCGAAAGCGTG  
GGGAG

>ASV:3245:Genus:Dialister

TACGTAGGTGGCAAGCGTTGTCCGGAAATTTACTGGGCGTAAAGCGCGCAGGCGGCTTCCCAAGTCCCTCTTAAAAGCGC  
GGGGCTTAACCCCGTATGGGAAGGAAACTGGGAAGTGGAGTATCGGAGAGGAAAGTGGAAATTCCTAGTGTAGCGGTGA  
AATGCGTAGATATTAGGAGGAACACCAGTGGCGAAGGCGGCTTACTGGACAGTAACGACGTTGAGGCTCAAAGCGTGG  
GGAGC

>ASV:3246:Genus:Coproccoccus\_3

TACGTAGGGGGCAAGCGTTATCCGGATTTACTGGGTGTAAAGGGAGCGTAGACGGCTGTGTAAGTCTGATGTGAAAACCC  
GGGGCTCAACCCGGGACTGCATTGAAAAGTATGCGGCTAGAGTGTCCGGAGAGGTAAGTGGAAATTCCTAGTGTAGCGGTG  
AAATGCGTAGATATTAGGAGGAACACCAGTGGCGAAGGCGGCTTACTGGACGATGACTGACGTTGAGGCTCGAAAGCGTG  
GGGAG

>ASV:3247:Genus:Coprobacillus

TACGTAGGTGGCGAGCGTTATCCGGAATCATTGGGCGTAAAGGGAGTAGGCGGCAATAGAGGCTGCGGTGAAAGCCT  
GAAGCTAAACTTCAGTAAGCGGTGGAACCAAATAGCTAGAGTGCAGTAGAGGATCGTGGAAATTCATGTGTAGCGGTGA  
AATGCGTAGATATTAGGAGGAACACCAGTGGCGAAGGCGACGATCTGGGCTGCAACTGACGCTCAGTCCGAAAGCGTGG  
GGAGC

>ASV:3248:Genus:Granulicatella

TACGTAGGTGGCAAGCGTTATCCGGATTTACTGGGCGTAAAGCGAGCGCAGGCGGTCAATTAAGTCTGATGTGAAAGTCC  
CCGGCTCAACCCGGGAGGGTCAATGGAAAAGTGTGACTTGGAGTGCAGAAAGAGGAGTGGAAATTCATGTGTAGCGGTG  
AAATGCGTAGATATTAGGAGGAACACCAGTGGCGAAGGCGACTCTCTGGTCTGTAACGACGCTGAGGCTCGAAAGCGTG  
GGTAG

>ASV:3249:Genus:Methylobacterium

TACGAAGGGGGCTAGCGTTGCTCGGAATCACTGGGCGTAAAGGGCGGTAGGCGGCTTGTAAAGTTGGGGGTGAAAGCCC  
GTGGCTCAACCACGGAATTCGATACTGCTTGGCTTGGAGTGTGGTAGAGGTTGGTGGAACTGCGAGTGTAGAGGTG  
AAAGTCTAGATATTCGAAGAACACCAGTGGCGAAGGCGGCAACTGGACCATCACTGACGCTGAGGCGCGAAAGCGTG  
GGGAG

>ASV:3250:Family:Lachnospiraceae

TACGTAGGGGGCAAGCGTTATCCGGATTTACTGGGTGTAAAGGGAGCGTAGACGGTGTGGCAAGTCTGATGTGAAAGGCA  
TGGGCTCAACCTGTGGACTGCATTGAAAAGTGTAACTTGGAGTGCAGAGGGGAGAGTGGAAATTCATGTGTAGCGGTG  
AAATGCGTAGATATTAGGAGGAACACCAGTGGCGAAGGCGGCTCTCTGGCTTGTAACTGACGCTGAGGCTCGAAAGCGTG  
GGGAG

>ASV:3251:Genus:Acidaminococcus

CACGTAGGTGGCAAGCGTTGTCCGGAAATTTACTGGGCGTAAAGAGCATGTAGGCGGGCTTTTAAAGTCTGACGTGAAAATGC  
GGGGCTTAACCCGATGCGGTGGATACTGGAAGTCTTGGAGTGCAGGAGAGGAAAGGGGAATTCAGTGTAGCGGTGA  
AATGCTTAGATATCACGAAGAAGTCCGATTGCGAAGGCAGCTCACTAGACTGCACTGACACTGATGCTCGAAAGTGTGG  
GTATC

>ASV:3252:Order:Bacteroidales

TACGGAGGATTAAGCGTTATCCGGATTTACTGGGTTTAAAGGGTGGTAGGCGGATTGGCAAGTCAGAAGTAAAATCCA  
TGGGCTTAACCCATGAACTGCTTTTAAAAGTGTAGTCTTGGAGTGAAGTAGAGGTAGGCGGAATTCAGGCTGTAGCGGTG  
AAATGCTTAGATATCACGAAGAAGTCCGATTGCGAAGGCAGCTTACTGGATTGTAACGACGCTGATGCTCGAAAGTGTG



GGTAT  
>ASV:3253:Kingdom:Bacteria  
TACGGAAGGTCCGGCGTTATCCGGATTTATTGGGTTTAAAGGGAGCGTAGGCGGACGCTTAAGTCAGTTGTGAAAAGTTT  
GCGGCTCAACCGTAAAATTGCAGTTGATACTGGTTGACTTAGAGTACAGGAGAGGGAAGCGGAATTCCTAGTGTAGCGGT  
GAAATGCGTAGATATTAGGAGAACACCAGTGGCGAAGGCGGCTTTCTGGACTGACACTGACGCTGAGGCTCGAAAGCGT  
GGGA  
>ASV:3254:Family:Ruminococcaceae  
TACGTAGGGAGCGAGCGTTGTCCGGATTTACTGGGTGTAAGGGTGCCTAGGCGGACTGGCAAGTCAGTGGTAAAACTA  
TGGGCTTAACCCATAGACTGCCATTGAACTGTTGGTCTTGAGTGAAGTAGAGGTAGGCGGAATTCCTAGTGTAGCGGTG  
AAATGCGTAGAGATCGGAAGGAACACCAGTGGCGAAGGCGGCTACTGGGCTTAACTGACGCTGAGGCACGAAAGTGTG  
GGTAA  
>ASV:3255:Genus:Ruminiclostridium\_9  
TACGTAGGTGGCAAGCGTTATCCGGATTTACTGGGTGTAAGGGCGTGTAGGCGGGATGGTAAAGTCAGATGTGAAACTA  
TGGGCTCAACTCATAGCTGCATTTGAACTGCTGTTCTTGAGTACTGGAGAGGACGACGGAATTCCTAGTGTAGCGGTG  
AAATGCGTAGATATTAGGAGGAACACCAGTGGCGAAGGCGGCTGCTGGACAGCAACTGACGCTGAGGCGGAAAGCGTG  
GGGAG  
>ASV:3256:Family:Lachnospiraceae  
TACGTAGGGGGCAAGCGTTATCCGGATTTACTGGGTGTAAGGGAGCGTAGACGGATTAGCAAGTCTGATGTGAAAGGCA  
GGGGCTCAACCCCGGACTGCTTTGAACTATGCAGCTAGAGTGTGCGAGAGGTAAGTGGAAATTCCTAGTGTAGCGGTG  
AAATGCGTAGATATCACGAAGAACTCCGATTGCGAAGGCAGCTCACTGGAGCGCAACTGACGCTGAAGCTCGAAAGTGC  
GGTAT  
>ASV:3257:Genus:Ruminococcaceae\_UCG-010  
TACGTAGGTGGCGAGCGTTATCCGGATTTACTGGGTGTAAGGGTGTGTAGGCGGGACTGCAAGTCAGATGTGAAACTA  
TGGGCTCAACTCATAGCTGCATTTGAACTGCTGTTCTTGAGGCTCGGAGAGGTAAGTGGAAATTCCTAGTGTAGCGGTG  
AAATGCGTAGATATCGGGAGGAACACCAGTGGCGAAGGCGGTTACTGGACGATACTGACGCTGAGACACGAAAGTGTG  
GGGAG  
>ASV:3258:Family:Lachnospiraceae  
TACGTATGGAGCAAGCGTTATCCGGATTTACTGGGTGTAAGGGAGTGTAGGTGGCCGTGCAAGTCAGAAGTAAAACTCC  
GGGGCTCAACCCGGAAGTGCCTTTGAACTGTAAGGCTAGAGTGCAGGAGGGGTGAGTGGAAATTCCTAGTGTAGCGGTG  
AAATGCGTAGATATCACGAAGAACTCCGATTGCGAAGGCAGCTGCTAAACCATAACTGACACTGAAGCACGAAAGCGTG  
GGTAT  
>ASV:3259:Family:Ruminococcaceae  
TACGTAGGGAGCGAGCGTTGTCCGGAATTAAGGGTGTAAAGGGAGCGCAGGCGGGTGTCAAGTCAGCTGTGAAACTA  
CGGGCTTAACCCGAGACTGCAGTTGAACTGTTTATCTTGAGTGAAGTAGAGGTTGGCGGAATTCCTAGTGTAGCGGTG  
AAATGCGTAGATATCACGAAGAACTCCGATTGCGAAGGCAGCTGCTGGACTGTAAGTCAGCTGATGCTCGAAAGTGTG  
GGTAT  
>ASV:3260:Genus:Erysipelatoclostridium  
TACGTAGGTGGCAAGCGTTATCCGGAATTTATTGGGCGTAAAGAGGGAGCAGGCGGCAGCAAGGGTCTGTGGTAAAAGACT  
GAAGCTTAACCTCAGTAAGCCATAGAAACCGGCGAGCTGGAGTGCAGGAGAGGATCGTGGAAATTCATGTGTAGCGGTGA  
AATGCGTAGATATATGGAGGAACACCAGTGGCGAAGGCGACGATCTGTCCTGTAAGTACGCTCAGTCCGAAAGCGTGG  
GGAGC  
>ASV:3261:Kingdom:Bacteria  
TACGTAGGTGGCAAGCGTTATCCGGAATTAAGGGTGTAAAGGGAGCGTAGGCGGGACGGCAAGTCAGATGTGAAACTA  
TGGGCTCAACCCATAGACTGCATTTGAACTGTTGTTCTTGAGTGAAGTAGAGGTAAGCGGAATTCCTAGTGTAGCGGTG  
AAATGCTTAGATATCACGAAGAACTCCGATTGCGAAGGCAGCTGCTAAGCTGCAACTGACATTGAGGCTCGAAAGTGTG  
GGTAT  
>ASV:3262:Family:Ruminococcaceae  
TACGTAGGGAGCAAGCGTTGTCCGGATTTACTGGGTGTAAGGGAGCGCAGGCGGGATAGCAAGTCAGCTGTGAAACTA  
TGGGCTCAACCCATAAAGTGCAGTTGAACTGTTATCTTGAGTGGAGTAGAGGAAAGGGGAATTCCTAGTGTAGCGGTG  
AAATGCGTAGATATTGGGAGGAACACCAGTGGCGAAGGCGCCTTTCTGGACTGTGCTGACGCTGAGATGCGAAAGCCAG  
GGTAG  
>ASV:3263:Family:Lachnospiraceae  
TACGGAGGATCCGAGCGTTATCCGGATTTACTGGGTGTAAGGGAGCGTAGACGGTAAAGCAAGTCTGAAGTAAAAGCCC  
GGGGCTCAACCCCGGACTGCTTTGAACTGCTTAACTAGAGTGTGGAGAGGTAAGCGGAATTCCTAGTGTAGCGGTG  
AAATGCTTAGATATCACGAAGAACTCCGATTGCGAAGGCAGCTGCTAAGCTGCAACTGACATTGAGGCTCGAAAGTGTG  
GGTAT  
>ASV:3264:Genus:Alloprevotella  
TACGTAGGTGGCAAGCGTTATCCGGAATTAAGGGTGTAAAGGGAGCGCAGGCGGACCTTTAAGTCAGCTGTGAAATACG  
GCGGCTCAACCGTCAACTGCAGTTGATACTGGAGGCTTGAGTGCACACAGGGATACTGGAATTCATGGTGTAGCGGTG  
AAATGCTTAGATATCACGAAGAACTCCGATTGCGAAGGCAGCTGCTAAGCTGCAACTGACATTGAGGCTCGAAAGTGTG  
GGTAT  
>ASV:3265:Genus:Erysipelotrichaceae\_UCG-003  
TACGGAGGATGCGAGCGTTATCCGGAATTTATTGGGCGTAAAGAGGGAGCAGGCGGCACTAAGGGTCTGTGGTAAAAGATC  
GAAGCTTAACCTCGGTAAGCCATGAAACCGTAGAGCTAGAGTGTGTGAGAGGATCGTGGAAATTCCTAGTGTAGCGGTGA  
AATGCGTAGATATCACGAAGAACTCCGATTGCGAAGGCAGCTGCTAAGCTGCAACTGACATTGAGGCTCGAAAGTGTG  
GTATC  
>ASV:3266:Genus:Blautia  
TACGTAGGGGGCAAGCGTTATCCGGATTTACTGGGTGTAAGGGAGCGTAGACGGAGCAGCAAGTCTGATGTGAAAGGCA

GGGGCTCAACCCCTGGACTGCATTGGAAGCTGTTGATCTTGAGTACCGAGGGGTAAGCGGAATTCCTAGTGTAGCGGTG  
AAATGCGTAGATATTAGGAGGAACACCAGTGGCGAAGGCGGCTTTCTGGACGATGACTGACGTTGAGGCTCGAAAGCGTG  
GGGAG

>ASV:3267:Family:Ruminococcaceae

TACGTAGGGAGCGAGCGTTGTCCGGAATTACTGGGTGTAAGGGTGCCTAGGCGGGCAATCAAGTCAGACGTGAAATCTA  
TGGGCTTAACCCATAGTCTGCGTTTGAAGCTGAATGTCTTGAGTGAAGTAGAGGTAAGCGGAATTCCTGGTGTAGCGGTG  
AAATGCGTAGAGATCGGGAGGAACACCAGTGGCGAAGGCGGCTTACTGGGCTTTACTGACGCTGAGGCACGAAAGCATG  
GGTAG

>ASV:3268:Kingdom:Bacteria

TACGTAGGGAGCAAGCGTTGTCCGATTTACTGGGTGTAAGGGTGCCTAGGCGGCTTTGCAAGTCAGATGTGAAATCTA  
TGGACTCAACCATAAAGCTGATTTGAAAGCTGAGAGCTTGAGTGAAGTAGAGGCAGGCGGAATTCCTGGTGTAGCGGTG  
AAATGCTTAGATATCACGAAGAAGCTCCGATTGCGAAGGCAGCTTGTCTGGACTGTAAGTACGCTGATGCTCGAAAGTGTG  
GGTAT

>ASV:3269:Genus:Dialister

TACGTAGGTGGCAAGCGTTGTCCGGAATTATTGGGCTAAAGCGCGCAGGCGGCTACTTAAGTCCATCTTAAAAGTGC  
GGGGCTTAACCCCGTATGGGATGGAAGCTGAGAAGCTGGAGTGTGCGGAGAGGAAAGTGAATTCCTAGTGTAGCGGTG  
AATGCGTAGAGATTAGGAAGAACACCGGTGGCGAAGGCGACTTTCTGGACGACAACTGACGCTTAGGCGCGAAAGCGTGG  
GGAGC

>ASV:3270:Species:bergensis

TACGGAAGGTCCGGCGTTATCCGGATTTATTGGGTTAAAGGGAGCGTAGGCCGTTAGTGTGTTGTGAAATCCG  
GTTTGCTCAACATCCGGTTTGCAGCGCATACTGTCCACTTGAGTGCGCACAACGCAGGCGGAATTCCTGCTGTAGCGGTG  
AAATGCTTAGATATGACGAGGAACCCGATTGCGAAGGCAGCTTGCGGGAGCGCAACTGACGCTTAGCTCGAAAGTGTG  
GGTAT

>ASV:3271:Family:Lachnospiraceae

TACGTAGGTGGCAAGCGTTATCCGGATTTACTGGGTGTAAGGGAGCGTAGACGGTAAAGCAAGTCTGAAGTGAAGGCC  
GCGGCTCAACTGCGGGACTGCTTTGGAAGCTGTTAACTGGAGTGTGCGGAGAGGTAAGTGAATTCCTAGTGTAGCGGTG  
AAATGCTTAGAGATCATACAGAACACCGATTGCGAAGGCAGCTTACCAAATATATGACGTTGAGGCACGAAAGCGTG  
GGGAG

>ASV:3272:Family:Prevotellaceae

TACGTAGGGGGCAAGCGTTATCCGGATTTATTGGGTTAAAGGGAGCGTAGGCCGAGATTAAGCGTGTGTTGTGAAATGTA  
GATGCTCAACATCTGCACTGCAGCGCAACTGGTTTCTTGGAGTACGCACAAGTAGGCGGAATTCCTGGTGTAGCGGTG  
AAATGCGTAGATATTAGGAGGAACACCAGTGGCGAAGGCGGATTACTGGACGGTAACGACGTTGAGGCTCGAAAGCGTG  
GGGAG

>ASV:3273:Family:Ruminococcaceae

TACGTAGGTGGCAAGCGTTGTCCGGAATTACTGGGTGTAAGGGCGCGTAGGCGGAGAGACAAGTCAGATGTGAAATCTA  
TGGGCTTAACCCATAAAGCTGATTTGAAAGCTATTTCCCTTGAGTGTGGAGAGGCAAGCGGAATTCCTAGTGTAGCGGTG  
AAATGCGTAGATATTAGGAGGAACACCAGTGGCGAAGGCGGCTTGTCTGGACATTAACGACGCTGAGGCGCGAAAGCGTG  
GGGAG

>ASV:3274:Family:Lachnospiraceae

TACGTAGGGGGCAAGCGTTATCCGGATTTACTGGGTGTAAGGGAGCGTAGACGGCGGAGCAAGTCTGAAGTGAAGGCC  
GGGGCTCAACCCGGGACTGCTTTGGAAGCTGTTTGGCTAGAGTGTGAGAGGTAAGTGAATTCCTAGTGTAGCGGTG  
AAATGCGTAGATATCGGGAAGAAGCTCCGATTGCGAAGGCAGCTTCTAAGCTGCAACTGACATTGAGGCTCGAAAGTGTG  
GGTAT

>ASV:3275:Order:Bacteroidales

TACGGAGGATCCGAGCGTTATCCGGATTTATTGGGTTAAAGGGAGCGTAGATGGATGTTTAAAGTCAAGTGTGAAAGTTT  
GCGGCTCAACCGTAAATGCAAGTTGATACTGGATATCTTGAGTGCAGTTGAGGCAGGCGGGATTCTGGTGTAGCGGTG  
GAATGTGTAGATATCGGGAAGAACCAATGGCGAAGGCAGCTTCTGGGCCCTTACTGACGCTGAGGAGCGAAAGCGTG  
GGGAG

>ASV:3276:Genus:Ruminococcaceae\_UCG-009

TACGTAGGTGGCGAGCGTTATCCGGATTTACTGGGTGTAAGGGCGAGTAGGCGGGATTGCAAGTCAGATGTGAAAACCTA  
TGGGCTCAACCCATAGACTGATTTGAAAGCTGATTTCTTGAGTGTGGAGAGGCAGGCGGAATTCCTGGTGTAGCGGTG  
AAATGCTTAGATATCACGAAGAAGCTCCGATTGCGAAGGCAGCTTGTCTGGACTGTAAGTACGCTGATGCTCGAAAGTGTG  
GGTAT

>ASV:3277:Family:Lachnospiraceae

TACGTATGGAGCAAGCGTTATCCGGATTTACTGGGTGTAAGGGAGCGTAGACGGCATAACAAGTCTGATGTGAAAGGCT  
GGGGCTTAACCCGGGACTGCATTGGAAGCTGTTAAGCTTGAGTGCCGGAGGGTAAGCGGAATTCCTAGTGTAGCGGTG  
AAATGCGTAGATATTAGGAGGAACACCAGTGGCGAAGGCGGCTTGTCTGGGCTTTAACTGACGCTGAGGCACGAAAGCGTG  
GGTAG

>ASV:3278:Class:Bacteroidia

TACGGAGGATCCGAGCGTTATCCGGATTTATTGGGTTAAAGGGAGCGTAGACGGTGTGGCAAGTCTGATGTGAAAGGCA  
TGGGCTCAACCTGTGGACTGCATTGGAAGCTGCATACTTGAGTGCCGGAGGGTAAGCGGAATTCCTAGTGTAGCGGTG  
AAATGCGTAGATATCACGAAGAAGCTCCGATTGCGAAGGCAGCTTGTCTAAGTGCAACTGACATTGAGGCTCGAAAGTGTG  
GGTAT

>ASV:3279:Kingdom:Bacteria

TACGTAGGGGGCAAGCGTTATCCGGATTTACTGGGTGTAAGGGGGCGTAGGCGGGATCGCAAGTCAGATGTGAAAGGCA  
GGGGCTTAACCCCTGGACTGATTTGAAAGCTGCTGTGCTTGAGTGCCGGAGGGTAAGCGGAATTCCTGGTGTAGCGGTG  
AAATGCTTAGATATCACGAAGAAGCTCCGATTGCGAAGGCAGCTTGTCTGGACTGTAAGTACGCTGATGCTCGAAAGTGTG  
GGTAT

>ASV:3280:Genus:Bifidobacterium  
TACGTAGGGTGCAAGCGTTATCCGGAATTATTGGGCGTAAAGGGCTCGTAGGCGGTTCTGTCGCGTCCGGTGTGAAAAGTCC  
ATCGCTTAACGGTGGATCCGCGCCGGGTACGGGCGGGCTTGTAGTGCAGGAGGGGACTGGAATTCGCGGTGAACGGTG  
GAATGTGTAGATATCGGAAGAACAACCGGTGGCGAAGGCGGCCTTCTGGGCCACAACGACGCTGAGGAGCGAAAAGCTGG  
GGAG

>ASV:3281:Species:curvus  
TACGGAGGGTGCAAGCGTTACTCGGAATCACTGGGCGTAAAGGACGCGTAGGCGGATTATCAAGTCTCTTGTGAAATCCA  
ATGGCTCAACTGAGTAAAGCTTTTAAAGTGCATCTTAGAGTACGGGAGAGGAGGAGTGAATTCGCGGTGTAGGGGTA  
AAATCCGTAGAGATACCGAGGAATACCATTGCGAAGGCGATCTGCTGGAACCTCAACTGACGCTAATGCGTGAAAGCGTG  
GGAG

>ASV:3282:Genus:Pseudoscardovia  
TACGTAGGGTGCAAGCGTTATCCGGAATTATTGGGCGTAAAGGGTTCGTTAGGCGGTTCTGTCGCGTCCGGTGTGAAAAGCC  
ATCGCTTAACGGTGGTCTGCGCCGGGTACGGGCGGGCTGGAGTGCAGGAGGGGACTGGAATTCGCGGTGTAGGGGTA  
GAATGTGTAGATATCAGGAAGAATCCGATTGCGAAGGCGAGCTGCTAAGCTGCAACTGACATTGAGGCTCGAAAGTGTG  
GGTAT

>ASV:3283:Species:lactolyticus  
TACGTAAAGTCCGAGCGTTGTCGGGAATCATTGGGCGTAAAGGGTACGTTAGGCGGGTAAGCAAGTTAGAAGTGAATCCT  
GTAGCTCAACTACAGTAAAGCTTTTAAAGTGCATCTTAGAGTATGGAAGGAAAGTGAATTCCTAGTGTAGCGGTGA  
AATGCGCAGATATTAGGAGGAATACCAGTGGCGAAGGCGACTTTCTGGCCATAATCTGACGCTGAGGTACGAAAGCGTGG  
GTAGC

>ASV:3284:Kingdom:Bacteria  
TACGGAGGATCCGAGCGTTATCCGGATTTATTGGGTTTAAAGGGAGCGTAGGCGGATTGTTAAGTCAGTTGTGAAAAGTTT  
GCGGCTCAACCGTAAAATTGCATTTGAAACTGTAGATCTTGTAGTGTGCGAGGGGCAATCGGAATTCCTAGTGTAGCGGTG  
AAATGCGTAGATATTAGGAGGAACACCAAGTGGCGAAGGCGGATTGCTGGACGATAACTGACGCTGAGGCGGAAAGCGTG  
GGAG

>ASV:3285:Genus:Bacteroides  
TACGGAGGATCCGAGCGTTATCCGGATTTATTGGGTTTAAAGGGAGCGTAGGTGGACATGTAAGTCAGTTGTGAAAAGTTT  
GCGGCTCAACCGTAAAATTGCATTTGATACTGTGTCTTGTAGTACAGTAGAGGTGGGCTGAATTCGTTGGTGTAGCGGTG  
AAATGCTTAGATATCAGGAAGAATCCGATTGCGAAGGCGAGCTACTGGACTGTTACTGACACTGAGGCTCGAAAGTGTG  
GGTAT

>ASV:3286:Genus:Family\_XIII\_UCG-001  
TACGTAGGGGGCAAGCGTTGTCCGGAATTATTGGGCGTAAAGAGTACGTTAGGCGGTTTCTAAGCGCAAGTGAAGGCA  
GTGGCTTAACCGTAAAGCTTGCAGTTCGCAACTGACAGACTTGTAGTGCAGGAGAGGAAAGCGGAATTCCTAGTGTAGCGGTG  
AATGCGTAGATATTAGGAGGAACACCGGTGGCGAAGGCGGCTTCTGGACTGTGTCTGACGCTGAGATGCGAAAGCCAG  
GTAGC

>ASV:3287:Species:rubra  
TACGGAGGGTGCAAGCGTTATCCGGATTCCTGCGGTTTAAAGGGTGCCTAGGTGGGTTAGTAAGTCAGTGGTGAATCTT  
CGAGCTTAACTCGGAAACTGCCATTGATACTATTAGTCTTGAATATTGTGGAGGTTAGCGGAATATGTCATGTAGCGGTG  
AAATGCTTAGATATGACATAGAACAACCAATTCGGAAGGCGAGCTGGCTACACATATATTGACACTGAGGCACGAAAGCGTG  
GGAT

>ASV:3288:Genus:Coprococcus\_3  
TACGGAGGATCCGAGCGTTATCCGGATTTATTGGGTTTAAAGGGAGCGTAGACGGCTGTGTAAGTCTGAAGTGAAGGCC  
GGGGCTCAACCCCGGACTGCTTTGAAACTATGCAGCTAGAGTGTGCGAGAGGTAAGTGAATTCAGTGTAGCGGTG  
AAATGCGTAGATATTGGGAGGAACACCAAGTGGCGAAGGCGGCTTCTGGACTGTGTCTGACGCTGAGATGCGAAAGCCAG  
GGTAG

>ASV:3289:Species:stearothermophilus  
TACGTAGGGGGCGAGCGTTGTCCGGAATTATTGGGCGTAAAGCGCGCAGGCGGTTCTTAAAGTCTGATGTGAAAAGCC  
ACGGCTCAACCGTGGAGGTCATTGGAAGTGGGGGACTTGGAGGAGGAGGAGGAGGCGGAATTCACGCTGTAGCGGTG  
AAATGCGTAGAGATGTGGAGGAACACCAAGTGGCGAAGGCGGCTCTCTGGCTGTACCTGACGCTGAGGCGGAAAGCGTG  
GGAG

>ASV:3290:Family:Lachnospiraceae  
AACGTAGGGGGCAAGCGTTATCCGGAATTTACTGGGTGTAAGGGAGCGTAGACGCGACGCAAGTCTGAAGTGAATACC  
CGGGCTCAACCTGGGAAGTCTTTGAAACTGTGTTGCTAGAGTGCAGGAGAGGTAAGCGGAATTCCTAGTGTAGCGGTG  
AAATGCGTAGATATTAGGAGGAACATCAGTGGCGAAGGCGGCTTACTGGACTGAAACTGACACTGAGGCACGAAAGCGTG  
GGAG

>ASV:3291:Family:Lachnospiraceae  
TACGTAGGGTGCAAGCGTTATCCGGAATTTACTGGGTGTAAGGGAGCGTAGGCGGATGGAAGTCAAGTGAAGTGAAGTGA  
AGGGCTTAACTCTGGGACTGCTTTGAAACTGTGACTAGAGTGCAGGAGAGGTAAGCGGAATTCGCGGTGTAGCGGTG  
GAATGCGTAGATATCGGGAGGAACACCAAGTGGCGAAGGCGGCTACTGGGCACCAACTGACGCTGAGGCTCGAAAGTGTG  
GGTAG

>ASV:3292:Genus:Anaerofilum  
AACGTAGGTGGCAAGCGTTGTCCGGAATTTACTGGGTGTAAGGGAGCGCAGGCGGAAGTGAAGTGGATGTCAAATCTA  
CGGGCTCAACCGTATACGATTCAAGACTGCGGTTCTTGTAGTGCAGGAGGTAAGCGGAATTCGCGGTGTAGCGGTG  
AATGCGTAGATATCGGGAGGAACACCAAGTGGCGAAGGCGGCTACTGGGCACCAACTGACGCTGAGGCTCGAAAGCATGG  
GTAGC

>ASV:3293:Family:Ruminococcaceae  
TACGTAGGGAGCGAAGCGTTGTCCGGAATTTACTGGGTGTAAGGGAGCGTAGGCGGGATCGCAAGTCAAGTGTGAAAAGT  
TGGGCTTAAACCATAAACTGCATTTGAAACTGTCTTGTAGTATCGGAGAGGCAAGCGGAATTCCTAGTGTAGCGGTG

AAATGCGTAGATATTAGGAGGAACACCAGTGGCGAAGGCGACCTACTGGGCACCAACTGACGCTGAGGCTCGAAAGCATG  
GGTAG  
>ASV:3294:Phylum:Firmicutes  
TACGTAGGGGCGAGCGTTATCCGGAATTATTGGGCGTAAAGGGCGGTAGACGGCTGTGTAAGTTATAGGTGAAAGCCC  
AACTTTCAAGTTTGAAGCTGCCTGTAATACTGCATGGCTTGGTGCAGGAGAGGGAAGCGGAATTCCTAGTGTAGCGGTG  
AAATGCGTAGATATTAGGAGGAACACCAGTGGCGAAGGCGGCTTTCTGGACTGTAACGACGTTGAGGCGCGAAAGCGTG  
GGGAG  
>ASV:3295:Genus:Flavonifractor  
TACGTAGGTGGCAAGCGTTATCCGGATTTATTGGGTGTAAGGGCGGTAGGCGGGACTGCAAGTCAGGTGTGAAAACCA  
GGGGCTCAACCTCTGGCTGCCTTGAAGCTGTAGTCTTGGAGTGTGGAGAGGCAATCGGAATTCCTGTGTAGCGGTG  
AAATGCGTAGATGTACGGAGGAACACCAGTGGCGAAGGCGGATTGCTGGACAGTAACGACGCTGAGGCGCGAAAGCGTG  
GGGAG  
>ASV:3296:Family:Ruminococcaceae  
TACGTAGGGAGCGAGCGTTATCCGGATTTACTGGGTGTAAGGGCGGTAGGCGGGATGGCAAGTCAGATGTGAAAACCTA  
TGGGCTCAACCCATAGCCTGCATTTGAACTGTCTTGGAGTGTGGAGAGGCAAGCGGAATTCCTGTGTAGCGGTG  
AAATGCGTAGATATACGGAGGAACACCAGTGGCGAAGGCGGCTTCTGGACTTAACGACGTTGAGGCGCGAAAGCGTG  
GGGAG  
>ASV:3297:Family:Family\_XIII  
TACGTAGGGGCGAAGCGTTATCCGGAATTATTGGGCGTAAAGAGTACGTAGGCGTTTTCTAAGCACAGGGTATAAGGCA  
ATGGCTTAACCATTTGGCTTGTGAAGTGGAGACTTGTAGTACAGGAGAGAAAGCGGAATTCCTAGTGTAGCGGTG  
AATGCGTAGATATTAGGAGGAACACCAGTGGCGAAGGCGGCTTCTGGACTGAAACTGACGCTGAGGTACGAAAGCGTG  
GGAGC  
>ASV:3298:Family:Ruminococcaceae  
AACGTAGGTCACAAGCGTTGTCCGGATTTACTGGGTGTAAGGGAGCGCAGGCGGGACTGCAAGTTGGATGTGAAATACC  
GTGGCTTAACCCGGAAGTGCATCCAAAAGTGTAGTCTTGGAGTGAAGTAGAGGCAAGCGGAATTCCTAGTGTAGCGGTG  
AAATGCGTAGATATTCCGGAGGAACACCAGTGGCGAAGGCGGCTACTGGGCACCAACTGACGCTGAGGCTCGAAAGCATG  
GGTAG  
>ASV:3299:Family:Lachnospiraceae  
TACGTATGGTCAAGCGTTATCCGGATTTACTGGGTGTAAGGGAGCGTAGACGGATGGCAAGTCTGATGTGAAAACCC  
GGGGCTCAACCCGGGACTGCATTGGAAGTGTTCATCTAGAGTGTGGAGAGGTAAGTGGAAATTCCTAGTGTAGCGGTG  
AAATGCGTAGATATCCGGAGGAACACCAGTGGCGAAGGCGGCTACTCCGGGCACCAACTGACGCTGAGGCTCGAAAGCATG  
GGTAG  
>ASV:3300:Kingdom:Bacteria  
TACGTATGGTCAAGCGTTATCCGGATTTATTGGGTTAAAGGGAGCGTAGGCGGGTTGTTAAGTCAGTTGTGAAAGTTT  
GCGGCTCAACCGTAAAATTGCAGTTGATACTGGCGACCTTGGTGCACAGAGGTAAGCGGAATTCCTAGTGTAGCGGTG  
AAATGCGTAGATATTAGGAGGAACACCAGTGGCGAAGGCGGCTTACTGGACAGTAACGACGTTGAGGCTCGAAAGCGTG  
GGGAG  
>ASV:3301:Genus:Bacteroides  
TACGGAGGATCCGAGCGTTATCCGGATTTATTGGGTTAAAGGGAGCGTAGATGGATGTTAAGTCAGTTGTGAAAGTTT  
GCGGCTCAACCGTAAAATTGCAGTTGATACTGGATGTCTTGGAGTGCAGTTGAGGCGAGGCGGAATTCCTGGTGTAGCGGTG  
AAATGCGTAGATATTAGGAGGAACACCAGTGGCGAAGGCGGCTTACTGAGCTGAACTGACGCTGAGGCTCGAAAGTGTG  
GGTAG  
>ASV:3302:Genus:Parabacteroides  
TACGGAGGATCCGAGCGTTATCCGGATTTATTGGGTTAAAGGGAGCGTAGGTGGATTGTTAAGTCAGTTGTGAAAGTTT  
GCGGCTCAACCGTAAAATTGCAGTTGATACTGGATGTCTTGGAGTGTGTTGAGGTAGGCGGAATTCCTGGTGTAGCGGTG  
AAATGCGTAGATATCACGAGAAGTCCGATTGCGAAGGCAGCTTACTAAACCATAACTGACACTGAAGCACGAAAGCGTG  
GGGAG  
>ASV:3303:Family:Ruminococcaceae  
TACGTAGGGAGCGAGCGTTGTCCGGAATTACTGGGTGTAAGGGAGCGTAGGCGGGATGCAAGTCAGATGTGAAAACCTA  
TGGGCTCAACCTGTAGATTGCATTTGAACTGTTGTTCTTGGAGTGAAGTAGAGGTAAGCGGAATGTATGGTGTAGCGGTG  
AAATGCTTAGATATCACGAAGAAGTCCGATTGCGAAGGCAGCTACTAGACTGCAACTGACACTGATGCTCGAAAGTGTG  
GGTAT  
>ASV:3304:Family:Lachnospiraceae  
TACGGAGGATCCGAGCGTTATCCGGATTTACTGGGTGTAAGGGAGCGCAGGCGGTGCGGCAAGTCTGATGTGAAAGCCC  
GGGGCTCAACCCGGGACTGCATTGGAAGTGTCTGACTAGAGCGTGGAGAGGTAAGTGGAAATTCCTAGTGTAGCGGTG  
AAATGCTTAGATATCACGAAGAAGTCCGATTGCGAAGGCAGCTTCTGGACTGTAACGACGCTGATGCTCGAAAGTGTG  
GGTAT  
>ASV:3305:Family:Lachnospiraceae  
TACGTATGGAGCAAGCGTTATCCGGATTTACTGGGTGTAAGGGTGCCTAGGTGGCAGTGCAGTGCAGATGTGAAAGGCC  
GGGGCCCAACCCGGAGCTGCATTTGAACTGCATAGCTGGAGTACAGGAGAGGCGAGGCGGAATTCCTAGTGTAGCGGTG  
AAATGCTTAGATATCACGAAGAAGTCCGATTGCGAAGGCAGCTTCTAAGCTGCAACTGACATTGAGGCTCGAAAGTGTG  
GGTAT  
>ASV:3306:Family:Christensenellaceae  
TACGTAGGGAGCAAGCGTTGTCCGGAATTACTGGGCGTAAAGGGTGCCTAGGCGGTTGTTAAGTCAGATGTGAAATACC  
CGAGCTTAACCTGGGGCTGCATCTGATACTGGATAACTAGAGTGCAGGAGAGGAAAGTGGAAATTCCTAGTGTAGCGGTG  
GAATGCGTAGATATTAGGAGGAACACCAGTGGCGAAGGCGACTTTCTGGACTGTAACGACGCTGAGGCGCGAAAGTATG  
GGTAG  
>ASV:3307:Genus:Parabacteroides

TACGGAGGATCCGAGCGTTATCCGGATTTATTGGGTTAAAGGGTGCCTAGGCGGCCTTTAAGTCAGCGGTGAAAAGTCT  
GTGGCTCAACCATAGAAATTGCCGTTGAAACTGGGGGCTTGGATGTTTGGAGGAGCGGGAATGCGTGGTGTAGCGGTG  
AAATGCTTAGATATCACGAGACCCCCGATGGCGAAGGCAGCCTGCCAAGCCATGACTGACGCTGATGCACGAAAGCGTG  
GGGAT

>ASV:3308:Genus:Subdoligranulum

TACGTAGGTGGCAAGCGTTGTCCGGATTTACTGGGTGTAAGGGAGCGCAGGCGGACCGGCAAGTTGGAAGTAAAACTA  
TGGGCTCAACCCATAAATTGCTTTCAAACCTGCTGGCCTTGGATAGTGCAGAGGTAGGTGGAATTCCTGGTGTAGCGGTG  
GAATGCGTAGATATCACGAAGAAGCTCCGATTGCGAAGGCAGCATACCAACTCGCGACTGACGCTGAGGCTCGAAAGCGTG  
GGTAT

>ASV:3309:Family:Ruminococcaceae

TACGTAGGTGGCAAGCGTTGTCCGGATTTACTGGGTGTAAGGGAGCGCAGCCGGGCATGCAAGTCAGATGTGAAATCCA  
TGGGCTTAACCCATGAAGTGCATTTGAAACTGATTTCTTGGACTGGAGAGGCAATCGGAATTCCTAGTGTAGCGGTG  
AAATGCTTAGATATCACGAAGAAGCTCCGATTGCGAAGGCAGTCACTAGACTGCAACTGACACTGATGCTCGAAAGTGTG  
GGTAT

>ASV:3310:Family:Lachnospiraceae

TACTGAGGATCCGAGCGTTATCCGGATTTACTGGGTGTAAGGGAGCGTAGACGGCAGCGCAAGCCAGATGTGAAAGCCC  
GGGGCTCAACCCGGTACTGCATTGAAACTGCTGCTACTAGAGTGTCCGAGGGGTAAGCGGAATTCCTAGTGTAGCGGTG  
AAATGCTTAGATATCACGAAGAAGCTCCGATTGCGAAGGCAGTCACTAGACTGTTACTGACACTGATGCTCGAAAGTGTG  
GGTAT

>ASV:3311:Genus:Marvinbryantia

TACGTATGGAGCAAGCGTTATCCGGATTTACTGGGTGTAAGGGAGCGTAGACGGCGCTGCAAGTCTGATGTGAAAGGCC  
GGGGCTCAACCCGGGACTGCATTGAAACTGTGGAGCTTGGAGTGCAGGAGAGGTAAGCGGAATTCCTAGTGTAGCGGTG  
AAATGCGTAGATATTAGGAGGAACACCAAGTGGCGAAGGCAGCTTACTGGACGTAACGACGTTGAGGCTCGAAAGCGTG  
GGGAG

>ASV:3312:Class:Bacteroidia

TACGGAGGATCCGAGCGTTATCCGGATTTATTGGGTTAAAGGGAGCGTAGGTGGATTGTTAAGTCAGTTGTGAAAGTTT  
GCGGCTCAACCGTAAATTTGCAAGTGGAACTGGCAGTCTAGAGTGTCCGAGAGGAAAGCGGAATTCCTAGTGTAGCGGTG  
AAATGCGTAGATATTAGGAGGAACACCAAGTGGCGAAGGCAGCTCTCTGGTCTGTAACGACGCTGAGGTTCTGAAAGCGTG  
GGTAG

>ASV:3313:Family:Ruminococcaceae

TACGTAGGGAGCAAGCGTTGTCCGGATTTACTGGGTGTAAGGGTGCCTAGGCGGCTTTGCAAGTCAGATGTGAAATCTA  
TGGGCTCAACCCATAGCCTGCATTTGAAACTGTAGTCTTGGAGTGTGGAGAGGCAATCGGAATTCCTAGTGTAGCGGTG  
AAATGCGTAGATATACGGAGGAACACCAAGTGGCGAAGGCAGCTTCTGGTCTGTAACGACGCTGAGGTTCTGAAAGCGTG  
GGTAG

>ASV:3314:Species:hominis

TACGGAGGGTGCAGCGTTATTCGGAATTACTGGGCGTAAAGCGCACGAGGCGGTTGCCAAGTCAGATGTGAAAGCCC  
CGGGCTTAACCTGGGAACTGCATTTGAAACTGGGCGACTAGAGTATGAAAGAGGAAAGCGGAATTCCTAGTGTAGCAGTG  
AAATGCGTAGATATTGGAAGGAACACCGATGGCGAAGGCAGCTTCTGGGCTGATACTGACGCTCATGTGCGAAAGCGTG  
GGGAG

>ASV:3315:Genus:Olsenella

TACGTAGGGGCGAGCGTTATCCGGATTTACTGGGCGTAAAGCGCTCGTAGGCTGCCGCTAGGTCGGGGTCAAATCCG  
GGGCTCAACCCGCAACCGCAGCCCGGATACCGGCGGGCTTGGAGTACAGGAGAGGAAAGCGGAATTCCTAGTGTAGCGGTG  
AATGCGCAGATATCTGGAAGAACACCGGTGGCGAAGGCAGCTTCTGGGCTCGACTGACGCTGAGGAGCGAAAGCTGGG  
GGAGC

>ASV:3316:Phylum:Firmicutes

TACGGAGGATCCGAGCGTTATCCGGATTTATTGGGTTAAAGGGAGCGTAGGTGGATTGTTAAGTCAGTTGTGAAAGTTT  
GCGGCTCAACCCGTAATAATTGCAAGTGGAACTGGGAGTCTTGGAGTACAGGAGAGGAAAGCGGAATTCCTAGTGTAGCGGTG  
AAATGCGTAGATATTAGGAGGAACACCAAGTGGCGAAGGCAGCTTCTGGACTGTAACGACACTGAGGCTCGAAAGCGTG  
GGGAG

>ASV:3317:Genus:Bacteroides

TACGGAGGATCCGAGCGTTATCCGGATTTATTGGGTTAAAGGGAGCGTAGGTGGACTGGTAAGTCAGTTGTGAAAGTTT  
GCGGCTCAACCCGTAATAATTGCAAGTGGAACTGGGAGTCTTGGAGTACAGTAGAGGTGGGCGGAATTCCTAGTGTAGCGGTG  
AAATGCGTAGAGATCGGAGGAACACCAAGTGGCGAAGGCAGCCTGCTGGGCTTAACTGACGCTGAGGACGAAAGCATG  
GGTAG

>ASV:3318:Genus:Ruminococcaceae\_UCG-005

TACGTAGGTGGCAAGCGTTGTCCGGATTTACTGGGTGTAAGGGAGCGTAGGCGGAGCTGCAAGTCAGATGTGAAATCTC  
CGGGCTTAACCCGGAAGTGCATTTGAAACTGTAGCCCTTGGATATCGGAGAGGCAAGCGGAATTCCTAGTGTAGCGGTG  
AAATGCGTAGATATTAGGAGGAACACCAAGTGGCGAAGGCAGCTTCTGGACTGTAACGACGCTGAGGCTCGAAAGCGTG  
GGGAG

>ASV:3319:Order:Bacteroidales

TACGGAGGATCCGAGCGTTATCCGGATTTATTGGGTTAAAGGGAGCGTAGGCGGGTCTGCAAGTCAGATGTGAAATCCA  
TGGGCTCAACCCATGAAGTGCATTTGAAACTGTAGATCTTGGAGTGTGGAGGGGCAATCGGAATTCCTAGTGTAGCGGTG  
AAATGCGTAGATATCACGAAGAAGCTCCGATTGCGAAGGCAGCTTACTGGATTGTAACGACGCTGATGCTCGAAAGTGTG  
GGTAT

>ASV:3320:Family:Lachnospiraceae

TACGTAGGGGCAAGCGTTATCCGGATTTACTGGGTGTAAGGGAGCGTAGACGGATGGACAAGTCTGATGTGAAAGACT  
GGGGCTCAACCCGGGACTGCATTGAAACTGCCGCTTGGAGTGCAGGAGAGGTAAGCGGAATTCCTGGTGTAGCGGTG  
AAATGCTTAGAGATCATACAGAACACCGATTGCGAAGGCAGCTTACCAACTATATCTGACGTTGAGGACGAAAGCGTG

GGGAG

>ASV:3321:Genus:Lachnospiraceae\_NK4A136\_group

TACGTAGGGGCAAGCGTTATCCGGATTTACTGGGTGTAAGGGGAGCGTAGACGGCATGGCAAGTCTGAAGTAAAATGCC  
AGGGCTTAACCTGGAAGTGCCTTTGAAACTGTCTAGCTAGAGTGCAGGAGAGGTAAGCGGAATTCCTAGTGTAGCGGTG  
AAATGCGTAGATATTAGGAGGAACACCAGTGGCGAAGGCGGCTTACTGGACTGTAACGACGTTGAGGCTCGAAGGCGTG  
GGGAG

>ASV:3322:Genus:Alistipes

TACGGAGGATCCAAGCGTTATCCGGATTTATTGGGTTTAAAGGGTGCCTAGGCGGTTTGATAAGTTAGAGGTAAAATACC  
GGTGCTTAACACCGAATTGCCTTAATACTGTTGAACTAGAGAGTAGTTGCGGTAGGCGGAATGTATGGTGTAGCGGTG  
AAATGCTTGATATCACGAAGAACTCCGATTGCGAAGGCAGCTCACTGGAGCGCAACTGACGCTGAAGCTCGAAAGTGC  
GGTAT

>ASV:3323:Order:Bacteroidales

TACGGAAGGTCCGGGCTTATCCGGATTTACTGGGTTTAAAGGGTGCCTAGGCTGTGCGTCAAGTCGGGGTAAAATCCC  
GGTGCTCAACACCGGGCTGCCCTTGATACTGTCGCGCTGGAGTGCAGGATGCCGCGGAGGAATGAGTGGTGTAGCGGTG  
AAATGCTTAGATATCACGAAGAACTCCGATTGCGAAGGCAGCTCACGGGAGCGCAACTGACGCTGAAGCTCGAAAGTGC  
GGTAT

>ASV:3324:Genus:Prevotella\_9

TACGGAAGGTCCGGGCTTATCCGGATTTATTGGGTTTAAAGGGAGCGTAGGCGGAGATTAAGCGTGTGTAAAATGTA  
GATGCTCAACATCTGAACTGCAACGCGAACTGGTTTCTTGGAGTACGCATAAAGTGGGCGGAATTCGTGGTGTAGCGGTG  
GAATGCGTAGATATCGGGAGGAACACCAGTGGCGAAGGCAGCTACTGGGCACCAACTGACGCTGAGGCTCGAAAGCATG  
GGTAG

>ASV:3325:Family:Ruminococcaceae

TACGTAGGTGGCAAGCGTTGTCCGGATTTACTGGGTGTAAGGGGCGTAGCCGGGAGGGCAAGTCAAGTGTAAAATCCA  
CGGGCTTAACCCATGAACTGCATTTGAAACTGATTTCTTGGAGTACTGGAGAGGCAATCGGAATTCCTAGTGTAGCGGTG  
AAATGCGTAGATATTAGGAGGAACACCAGTGGCGAAGGCGGCTACTGGGCACCAACTGACGCTGAGGCTCGAAAGTGTG  
GGTAG

>ASV:3326:Genus:Achromobacter

TACGTAGGGTGGCAAGCGTTAATCCGAACTTACTGGGCGTAAAGCGTGCAGGCGGTTTCGAAAAGAAAGATGTAAAATCCC  
AGAGCTTAACCTTGAAGTGCATTTTAACTACCGAGCTAGAGTGTGTGAGAGGAGGTGGAATTCGCGGTGTAGCAGTG  
AAATGCGTAGATATGCGGAGGAACACCAGTGGCGAAGGCAGCTCCTGGGATAACACTGACGCTCATGCACGAAAGCGTG  
GGGAG

>ASV:3327:Species:inhibens

TACGTAGGTGGCAAGCGTTGTCCGGATTTATTGGGCGTAAAGCGAGCGAGGCGGTTTTTTAAGTCTGATGTAAAAGCCC  
CCGGCTCAACCCGGGAGGGTATTGAAACTGGAGAAGTGGAGTGCAGAAAGGAGAGTGGAAATTCACGCTGTAGCGGTG  
AAATGCGTAGATATGTGGAGGAACACCAGTGGCGAAGGCAGCTCCTGGTCTGTAACGACGCTGAGGCTCGAAAGCGTG  
GGGAG

>ASV:3328:Order:Clostridiales

TACGTAGGGAGCAAGCGTTGTCCGGATTTACTGGGTGTAAGGGTGCCTAGGCGGATTGGCAAGTCAGAAGTAAAATCCA  
TGGGCTTAACCCATGAACTGCATTTGAAACTGTAGATCTTGGAGTGCAGGAGGGCAAGCGGAATTCCTAGTGTAGCGGTG  
AAATGCTTAGAGATCATACAGAAACCCGATTGCGAAGGCAGCTTACCAAATATATGACGTTGAGGCACGAAAGCGTG  
GGGAG

>ASV:3329:Family:Lachnospiraceae

TACGGAGGATCCGAGCGTTATCCGGATTTACTGGGTGTAAGGGGAGCGTAGACGGTGTGGCAAGTCTGATGTAAAAGGCA  
TGGGCTCAACCTGTGGACTGCATTTGAAACTGTCATACTTGGAGTGCAGGAGGGTAAGCGGAATTCCTAGTGTAGCAGTG  
AAATGCGTAGATATTAGGAGGAACACCAGTGGCGAAGGCGGATTGCTGGACGATAACTGACGCTGAGGCGCGAAAGTGTG  
GGGAG

>ASV:3330:Family:Lachnospiraceae

TACGGAGGATCCGAGCGTTATCCGGATTTATTGGGTTTAAAGGGGAGCGTAGACGGTTAAGCAAGTCTGAAGTAAAAGCCC  
GGGGCTCAACCCCGGTACTGCTTTGAAACTGTTTACTTGGAGTGCAGGAGAGGTAAGTGGAAATTCCTAGTGTAGCGGTG  
AAATGCTTAGATATCACGAAGAACTCCGATTGCGAAGGCAGCTGCTAAGCTGCAACTGACATTGAGGCTCGAAAGTGTG  
GGTAT

>ASV:3331:Family:Lachnospiraceae

TACGTATGGAGCAAGCGTTATCCGGATTTACTGGGTGTAAGGGTGCCTAGGTTGGCAGTGCAGTCAAGTCAAGTGTAAAAGGCC  
GGGGCTCAACCCCGAATTGCTTTTGAAGTGTGAGGCTAGAGTGTGCGGAGGGTAAGCGGAATTCCTAGTGTAGCGGTG  
AAATGCGTAGATATTAGGAGGAACACCAGTGGCGAAGGCGGCTTACTGGACGATTACTGACGCTGAGGCTCGAAAGCGTG  
GGGAG

>ASV:3332:Genus:Ruminococcaceae\_UCG-013

TACGTAGGTGGCAAGCGTTGTCCGGATTTACTGGGTGTAAGGGGCGCTAGGCGGGATAGCAAGTCAAGTCAAGTGTAAAATGCC  
GAGGCTTAACCTCGGAGCTGCGATTGAAACTGTTATTTCTTGGAGTATCGGAGAGGAAAGCGGAATTCCTAGTGTAGCGGTG  
AAATGCGTAGATATTAGGAGGAACACCAGTGGCGAAGGCGGCTTCTGGACGACAAGTACGCTGAGGCGCGAAAGTGTG  
GGGAG

>ASV:3333:Family:Lachnospiraceae

TACGTAGGGGCAAGCGTTATCCGGATTTACTGGGTGTAAGGGGAGCGTAGACGGTATGGTAAGTCAAGTGTAAAAGCCC  
GGGGCTTAACCCCGAAGTGCATTTGAAACTATCAAACTAGAGTGTGCGGAGAGGTAAGTGGAAATTCCTAGTGTAGCGGTG  
AAATGCGTAGATATTAGGAGGAACACCAGTGGCGAAGGCGGCTTACTGGACGATAACTGACGCTGAGGCTCGAAAGCGTG  
GGGAG

>ASV:3334:Family:Burkholderiaceae

TACGTAGGGTGGCAAGCGTTAATGGAATTTACTGGGCGTAAAGCGTGCAGGCGGTTATGCAAGACAGAGGTAAAATCCC

CGGGCTCAACCTGGGAAGTGCCTTTGTGACTGCATGGCTAGAGTACGGTAGAGGGGGATGGAATTCGCGTGTAGCAGTG  
AAATGCGTAGATATGCGGAGGAACACCGATGGCGAAGGCAATCCCCTGGACCTGACTGACGCTCATGCACGAAAGCGTG  
GGGAG

>ASV:3335:Genus:Subdoligranulum  
AACGTAGGGTGAAGCGTTGTCCGGAATTACTGGGTGTAAGGGAGCGCAGGCGGACCGCAAGTTGGAAGTAAAACCTA  
TGGGCTCAACCCATAAATTGCTTTCAAAGTCTGGCCTTGGAGTAGTGCAGAGGTAGGTGGAATTCCTAGTGTAGCGGTG  
AAATGCTTAGATATTACGAAGAAGTCCGATTGCGAAGGCAGCTTACTGGATTGTAACGACGCTGATGCTCGAAAGTGTG  
GGTAT

>ASV:3336:Family:Lachnospiraceae  
TACGTATGGTGAAGCGTTATCCGGATTTACCGGGTGTAAAGGGAGCGTAGACGGCGCAGCAAGTCTGATGTGAAAGGCA  
GGGGCTTAACCCCTGGACTGCATTGGAAGTCTGTGCTTGGAGTGCAGAGGGTAAGCGGAATTCCTAGTGTAGCGGTG  
AAATGCTTAGAGATCATACAGAACACCGATTGCGAAGGCAGTTACCAAATATATCTGACGTTGAGGCACGAAAGCGTG  
GGGAG

>ASV:3337:Order:Bacteroidales  
TACGGAGGATCCGAGCGTTATCCGGATTTATTGGGTTAAAGGGAGCGTAGGCGGACTATTAAGTCAAGTGTGAAAGTTT  
GCGGCTCAACCGTAAAATTGCAAGTGAAGTGGCAGTCTTGGAGTACAGTAGAGGTGGGCGGAATTCGTGGTGTAGCGGTG  
AAATGCGTAGATATTGGGAGGAACACCGATTGCGAAGGCAGCTTCTGGACTGTGTCTGACGCTGAGATGCGAAAGCCAG  
GGTAG

>ASV:3338:Family:Lachnospiraceae  
TACGGAAGGTCCGGGCTTATCCGGATTTATTGGGTTAAAGGGAGCGCAGGCGGAAGGCTAAGTCTGATGTGAAAGCCC  
GGGGCTCAACCCCGTACTGCATTGGAAGTGGTCACTAGAGTGTCCGAGGGGTAAGTGAATTCCTAGTGTAGCGGTG  
AAATGCATAGATATGACGCAGAAGTCCGATTGCGAAGGCAGCATACCAACTCGCGACTGACGCTGAGGCTCGAAAGCGTG  
GGTAT

>ASV:3339:Family:Lachnospiraceae  
TACGTAGGGGGCAAGCGTTATCCGGATTTACTGGGTGTAAGGGAGCGTAGACGGTTATGTAAGTCTGATGTGAAAACCC  
GGGGCTCAACCCCGGACTGCATTGGAAGTGTAACTAGAGTGTCCGAGAGGTAAGTGAATTCCTAGTGTAGCGGTG  
AAATGCGTAGAGATCTGGAGGAATACCGTGGCGAAGGCAGCCCTTGGACGAAAGTCAAGTGTGAGGCTCGAAAGCGTG  
GGGAG

>ASV:3340:Genus:Blautia  
TACGTAGGGGGCAAGCGTTATCCGGATTTACTGGGTGTAAGGGAGCGTAGACGGATTAGCAAGTCTGATGTGAAAGGCG  
GGGGCTCAACCCCGGACTGCATTGGAAGTGGCAGTCTTGGAGTGCAGAGGTAAGCGGAATTCCTAGTGTAGCGGTG  
AAATGCGTAGATATTAGGAGGAACACCGATTGCGAAGGCAGCTTACTGGACGGCAACTGACGTTGAGGCTCGAAAGCGTG  
GGGAG

>ASV:3341:Family:Ruminococcaceae  
TACGTAGGTGGCAAGCGTTATCCGGATTTACTGGGTGTAAGGGCGTGTAGGCGGGATTGCAAGTCAAGTGTGAAAACCA  
GGGGCTCAACCTCTGGCCTGCATTGGAAGTGTAGTCTTGGAGTACTGGAGAGGCAGACGGAATTCCTAGTGTAGCGGTG  
AAATGCGTAGATATTAGGAGGAACACCGATTGCGAAGGCAGCTTCTGGACGATGACTGACGTTGAGGCTCGAAAGCGTG  
GGGAG

>ASV:3342:Family:Lachnospiraceae  
TACGTATGGTGAAGCGTTATCCGGATTTACTGGGTGTAAGGGAGCGTAGGTGGCTGTGCAAGTCAAGTGAAGGCC  
GGGGCTTAACCCCGGACTGCTTTTGAAGTGTGCGGCTGGAGTGCAGGAGAGGTAAGTGAATTCCTAGTGTAGCGGTG  
AAATGCGTAGATATTAGGAGGAACACCGTGGCGAAGGCAGCTTACTGGACTGTAACGACACTGAGGCTCGAAAGCGTG  
GGGAG

>ASV:3343:Family:Ruminococcaceae  
TACGTAGGTGGCAAGCGTTATCCGGATTTACTGGGTGTAAGGGCGTGTAGGCGGGTAGCAAGTCAAGTGTGAAAACCTA  
TGGGCTCAACCCATAGCCTGCATTGGAAGTGTGGTCTTGGAGTGTGGAGAGGCAATCGGAATTCCTGTGTAGCGGTG  
AAATGCGTAGATATACGAGGAACACCGATTGCGAAGGCAGCTTACTGGACGTAACGACGCTGAGGCGCGAAAGCGTG  
GGGAG

>ASV:3344:Family:Burkholderiaceae  
TACGTAGGGTGAAGCGTTAATCGGAATTACTGGGCTAAAGGGTGCAGGCGGCTGTGCAAGACAGATGTGAAATCCC  
CGAGCTTAACCGGGAATGGCATATGTGACTGCTCGACTAGAGTGTGTCAGAGGGAGGTGGAATTCACGCTGAGCAGTG  
AAATGCTTAGATATCACGAAGAAGTCCGATTGCGAAGGCAGCTGCTAAGCTGCAACTGACATTGAGGCTCGAAAGTGTG  
GGTAT

>ASV:3345:Order:Bacteroidales  
TACGGAGGATCCGAGCGTTATCCGGATTTATTGGGTTAAAGGGAGCGCAGGCGGGGATCAAGTTGGAAGTAAAATCCA  
TGGGCTCAACCCATGAAGTGTCTTTCAAAGTGGTCTTGGAGTAGTGCAGAGGTAGGCGGAATTCGTGGTGTAGCGGTG  
AAATGCTTAGATATCACGAAGAAGTCCGATTGCGAAGGCAGCTTACTGGACTGTAACGACGCTGATGCTCGAAAGTGTG  
GGTAT

>ASV:3346:Order:Bacteroidales  
TACGGAGGATCCGAGCGTTATCCGGATTTATTGGGTTAAAGGGTGCAGTGGCAGTGAAGTCAAGTGTGAAAGGCC  
GGGGCTCAACCCCGGAGCTGCATTGGAAGTGTGCGGCTGGAGTGCAGGAGAGGCAGGCGGAATTCCTAGTGTAGCGGTG  
AAATGCTTAGATATCACGAAGAAGTCCGATTGCGAAGGCAGCTCACTGGACTGCAACTGACACTGATGCTCGAAAGTGTG  
GGTAT

>ASV:3347:Genus:Ruminococcaceae\_UCG-013  
TACGTAGGTGACAAGCGTTGTCCGATTTACTGGGTGTAAGGGCGCGCAGGCGGGACATCAAGTCAAGTGTGAAATGCC  
GGGGCTCAACCCCGGAGCTGCATTGGAAGTGAAGTCTTGGAGTATCGGAGAGGAAAGCGGAATTCCTAGTGTAGCGGTG  
AAATGCGTAGATATTGGGAGGAACACCGATTGCGAAGGCAGCTTCTGGACGAAACTGACGCTGAGGCGCGAAAGTGTG  
GGGAG

>ASV:3348:Genus:GCA-900066225  
TACGTAGGTGGCAAGCGTTGTCCGGAATTACTGGGTGTAAAGGGAGCGTAGGCGGGAGAGCAAGTTGAATGTTAAATCTA  
TGGGCTCAACCCATAGCAGCGTTCAAACCTGTTTTCTTGAGTGAAGTAGAGGCAAGCGGAATTCCTAGTGTAGCGGTGA  
AATGCGTAAATATTAGGAGGAACACCAGTGGCGAAGGCGGCTTGCTGGGCTTAACTGACGCTGAGGCTCGAAAGCGTGG  
GTAGC

>ASV:3349:Genus:Alistipes  
TCCTTCTTCTCCCTCTTTCTCTTCTTTCTGGGTTAAAGGGTGCCTAGGCGGTTTGATAAGTTAGAGGTGAAATCCC  
GGGGCTTAACCCGAACTGCCTTAATACTGTTAGACTAGAGAGTAGTTGCGGTAGGCGGAATGTATGGTGTAGCGGTG  
AAATGCTTAGAGATCATAACGAACACCAGTTCGCAAGGCAGCTTACCAAATATATCTGACGTTGAGGCACGAAAGCGTG  
GGGAG

>ASV:3350:Kingdom:Bacteria  
TACGTAGGGAGCGAGCGTTGTCCGATTACTGGGTGTAAAGGGCGCGTAGGCGGATTGGCAAGTCAGAAGTGAATCCA  
TGGGCTTAACCCATGAATGCTTTTGAACCTGTTAGTCTTGAGTGAAGTAGAGGTGGCGGAATTCGTGGTGTAGCGGTG  
AAATGCTTAGATATCAGGAAGAACTCCGATTGCGAAGGCAGCTCACTGGACTGCAACTGACACTGATGCTCGAAAGTGTG  
GGTAT

>ASV:3351:Genus:Butyricicoccus  
TACGTAGGGAGCAAGCGTTATCCGGATTACTGGGTGTAAAGGGCGAGTAGGCGGGCTGGCAAGTTGGGAGTGAATCCG  
GGGGCTTAACCCGAACTGCCTTCAAACCTGCTGGTCTTGAGTATCGGAGAGGCAAGCGGAATTCCTAGTGTAGCGGTG  
AAATGCGTAGATATACGAGGAACACCAGTGGCGAAGGCGGCTGCTGGACATTAAGTACGCTGAGGCGCAAGCGGTG  
GGGAG

>ASV:3352:Class:Bacteroidia  
TACGGAGGATCCGAGCGTTATCCGGATTATTGGGTTAAAGGGAGCGTAGATGGGTTGTTAAGTCAGTTGTGAAAGTTT  
GCGGCTCAACCGTAAATGCAATTGATACTGGCAGCTTTGAGTATCGGAGAGGCAATCGGAATTCCTAGTGTAGCGGTG  
AAATGCGTAGATATTAGGAGGAACACCAGTGGCGAAGGCGGATTGCTGGACGACAACGACGTTGAGGCTCGAAAGCGTG  
GGGAG

>ASV:3353:Genus:Lachnospiraceae\_FC5020\_group  
TACGTAGGGGGCAAGCGTTATCCGGATTACTGGGTGTAAAGGGAGCGTAGACGGCTTTCGAAGTCTGACGTGAAACTCC  
GGGGCTCAACCGTAAATGCAATTGCAACTGTAAGCTTGAGTGGCGGAGAGGTAAGCGGAATTCCTAGTGTAGCGGTG  
AAATGCGTAGATATTAGGAGGAACACCAGTGGCGAAGGCGGCTTACTGGACGCAACTGACGTTGAGGCTCGAGAGCGTG  
GGGAG

>ASV:3354:Order:Armatimonadales  
TACGTAGGGGGCGAGCGTTGTCCGAAGTTACTGGGCGTAAAGGGCGCGTAGGCGGCAATTAAGTTTGGGGTGAAGGTT  
CAGCGCTCAACCGCAACAGTGCCTTGAATACTGGTTGGCTTGAAATGAGGAAGAGGATAGCGGAATTCCTGGTGTAGCGGT  
GAAATGCGTAGATATCAGGAGGAACCCCGGTGGCGAAGGCGGCTATCTGGTCTATCATTGACGCTGAGGCGCAAGCGTG  
GGGGA

>ASV:3355:Genus:Erysipelatoclostridium  
TACGTAGGTGGCGAGCGTTATCCGGAATTATTGGGCGTAAAGGGAGCGAGGCGGCGCAGAGGTCTGTGGTGAAGACT  
GAAGCTTAACCTCAGTAAGCCATAGAAACCGGCTGCTAGAGTGTAGGAGAGGATCGTGAATTCATGTGTAGCGGTGA  
AATGCGTAGATATTAGGAAGAACACCAGTGGCGAAGGCGGCTACTGGGCACCAACTGACGCTGAGGCTCGAAGGTGTGG  
GTAGC

>ASV:3356:Genus:Bacteroides  
TACGGAGGATCCGAGCGTTATCCGGATTATTGGGTTAAAGGGAGCGTAGGCGGATTGGCAAGTCAGAAGTGAATCCA  
TGGGCTTAACCCATGAAGTGTCTTTGAACTGTTAGTCTTGAGTGAAGTAGAGGTGGCGGAATTCGTGGTGTAGCGGTG  
AAATGCTTAGATATCAGGAAGAACTCCGATTGCGAAGGCAGCTGCTAAGCTGCAACTGACATTGAGGCTCGAAAGTGTG  
GGTAT

>ASV:3357:Genus:Dialister  
TATGTAGGTGGCAAGCGTTGTCCGGAATTATTGGGCGTAAAGCGCGCAGGCGGCTTCTTAAGTCCATCTTAAAGTGC  
GGGGCTTAACCCGATGAGGATGGAAGTGGGAGGCTGGAGTATCGGAGAGGAAAGTGAATTCCTAGTGTAGCGGTGA  
AATGCTTAGATATCAGGAAGAACTCCGATTGCGAAGGCAGCTCACTAGACTGTCACTGACACTGATGCTCGAAAGCGTG  
GTATC

>ASV:3358:Genus:Bacteroides  
TACTTCTTCTCTCTCTTTCTCTTCTTTCTTTTTTCAAGGGAGCGTAGATGGATGTTAAGTCAGTTGTGAAAGTTT  
GCGGCTCAACCGTAAATGCAAGTGTACTGGATATCTTGAGTGCAGTTGAGGCGGCGGAATTCGTGGTGTAGCGGTG  
AAATGCTTAGATATCAGGAAGAACTCCGATTGCGAAGGCAGCTGCTAAGCTGCAACTGACATTGAGGCTCGAAAGTGTG  
GGTAT

>ASV:3359:Species:acidophilus/amylovorus/ultunensis  
TACGTAGGTGGCAAGCGTTGTCCGGAATTATTGGGCGTAAAGCGAGCGGCGGAAAAATAAGTCTAATGTGAAAGCCC  
TCGGCTTAACCGAGGAACTGCATCGGAACTGTTTTCTTGAGTGCAGAAGAGGAGAGTGGAACTCCATGTGTAGCGGTG  
GAATGCGTAGATATATGGAAGAACACCAGTGGCGAAGGCGGCTCTCTGGTCTGCAACTGACGCTGAGGCTCGAAAGCATG  
GGTAG

>ASV:3360:Family:Lachnospiraceae  
TACGTAGGGGGCAAGCGTTATCCGGATTACTGGGTGTAAAGGGAGCGTAGGCGGCTGAGCAAGTCAGAAGTGAAGGCC  
GCGGCTTAACCGGACTGCTTTTGAACCTGCCAGCTTGATTGCCGAGAGGTAAGTGAATTCCTAGTGTAGCGGTG  
AAATGCGTAGATATTAGGAGGAACACCAGTGGCGAAGGCGGCTTACTGGACGTTCAATGACGCTGAGGCTCGAAAGCGTG  
GGGAG

>ASV:3361:Genus:Alistipes  
TACGGAGGATTAAGCGTTATCCGGATTATTGGGTTAAAGGGTGCCTAGGCGGATTAGTAAGTTAGAGGTGAAAGCTC  
GATGCTCAACATCGAAATTCCTGATACTGTTAGTCTAGAGTATAGTTGCGGAAGGCGGAATGTGTGGTGTAGCGGTG



AAATGCTTAGAGATCATACAGAACACCGATTGCGAAGGCAGCTTACCAAATATATCTGACGTTGAGGCACGAAAGCGTG  
GGAG  
>ASV:3362:Order:Clostridiales  
TACGGAGGATCCGAGCGTTATCCGGATTTATTGGGTTTAAAGGGAGCGTAGGCGGACGCTTAAGTCAGTTGTGAAAGTTT  
GCGGCTCAACCGTAGTAAGCCTTTGAAACTGGGAACTTGAGTGCAGGAGAGAGAGTGAATTCTAGTGTAGCGGTGA  
AATGCGTAGATATTAGGAGGAACACCAAGTGGCGAAGGCGGCTTACTGGACGATGACTGACGCTGAGGCTCGAAAGCGTG  
GGAG  
>ASV:3363:Genus:Christensenellaceae\_R-7\_group  
TACGTAGGGGGCGAGCGTTGTCCGGAATGACTGGGCGTAAAGGGCGTGTAGGCGGCTTTTTAAGTCTGGAGTAAAAGCCC  
CTTTTTCAAGGAGGGGAGTGCCTTTGGAGACTGGAGAGCTTGGAGTGCAGGAGAGGTAAGTGAATTACCAGTGTAGCGGTG  
AAATGCGTAGAGATTGGGAGGAACACCAAGTGGCGAAGGCGACTTACTGGGCCGTAACGACGCTGAGGCGCGAAAGCGTG  
GGAG  
>ASV:3364:Genus:Butyricimonas  
TACGGGGGATGCGAGCGTTATCCGGATTTATTGGGTTTAAAGTGCAGCGTAGGCGGGACGTCAGTCAGCGGTAAAATACT  
GCAGCTAAAATGTAGCAGCGCTTAACTGGCGCCCTGGAGACGAGACGAGGGAGGCGGAACAAGTGAAGTAGCGGTGA  
AATGCATAGATATCACTTGGAAACCCGATAGCGAAGGCAGCTTCCCAGGCTCGTTCTGACGCTGATGCGCGAGAGCGTGG  
GTAGC  
>ASV:3365:Genus:Prevotella  
TACGGAAGGTCGGGCGTTATCCGGATTTATTGGGTTTAAAGGGAGCGTAGGCGCCAGATAAGCGTGTGTGAAATGTA  
CCGGCTCAACCGGTGAATTGCAGCGCAACTGTTTGGCTTGGAGTGCAGCGTAAGCAGGCGAAATTCATGGTGTAGCGGTG  
AAATGCTTAGATATCATGAAGAATCCGATTGCGAAGGCAGCTTCTGCAAGTGCAGCTGACGCTGATGCTCGAAGGTGCG  
GGTAT  
>ASV:3366:Family:Lachnospiraceae  
TACGTAGGGGGCAAGCGTTATCCGGATTTACTGGGTGTAAGGGGAGCGTAGACGGTTTTGCAAGTCTGAAGTAAAAGCCC  
GGGGCTCAACCCCGGACTGCTTTTGAAGTGCAGGGCTAGAGTGCAGGAGGGGCAAGTGAATTCTAGTGTAGCGGTG  
AAATGCGTAGATATCAGGAAGAATCCGATTGCGAAGGCAGCTGCTAAGCTGCAACTGACATTGAGGCTCGAAAGTGTG  
GGTAT  
>ASV:3367:Genus:Streptococcus  
TAAGTAGTCCCAGCGTTGTCCGGATTTATTGGGCGTAAAGCGAGCGCAGGTGGTTAGATAAGTCTGAAGTAAAAGGCT  
GTGGCTTAACCATAGTACGCTTTGAAACTGTTAACTTGGAGTGCAGGAGGGGAGAGTGAATTCCATGTGTAGCGGTGA  
AATGCGTAGATATAGGAGGAACACCGGTGGCGAAAGCGGCTCTCTGGCTTGAAGTGCAGCTGAGGCTCGAAAGCGTG  
GGAG  
>ASV:3368:Genus:Dorea  
TACGTAGGGGGCAAGCGTTATCCGGATTTACTGGGTGTAAGGGGAGCGTAGACGGAACGGCAAGCCAGATGTGAAAGCCC  
GGGGCTCAACCCCGGACTGCAATTTGAACTGCTGAGCTAGAGTGTCCGAGAGGCAAGTGAATTCTAGTGTAGCGGTG  
AAATGCGTAGATATTAGGAGGAACACCAAGTGGCGAAGGCGGCTTCTGGACGATGACTGACGTTGAGGCTCGAAAGCATG  
GGGAG  
>ASV:3369:Family:Ruminococcaceae  
TACGTAGGGGGCAAGCGTTGTCCGGATTTACTGGGTGTAAGGGTGCAGTAGGCGGATTGGCAAGTCAAGTGAATCCA  
TGGGCTTAACCCATGAACTGCTTTTGAAGTGTAGTCTTGGAGTGAAGTGAAGGTAGGCGGAATTCCCGGTGTAGCGGTG  
AAATGCTTAGATATCAGGAAGAATCCGATTGCGAAGGCAGCTACTAGACTGTCACTGACACTGATGCTCGAAAGTGTG  
GGTAT  
>ASV:3370:Genus:Fusicatenibacter  
TACGTAGGGGGCAAGCGTTATCCGGATTTACTGGGTGTAAGGGGAGCGTAGGCGGCAAGGCAAGTCTGATGTGAAAACCC  
AGGGCTTAACCTGGGACTGCAATTTGAAACTGCTTGGCTCGAGTGCAGGAGGGTAAGCGGAATTCTAGTGTAGCGGTG  
AAATGCTTAGATATCAGGAAGAATCCGATTGCGAAGGCAGCTACTAGACTGTCACTGACACTGATGCTCGAAAGTGTG  
GGTAT  
>ASV:3371:Family:Ruminococcaceae  
TACGTAGGTGCAAGCGTTGTCCGGATTTACTGGGTGTAAGGGGCGAGTAGGCGGGCTAACCAAGTCAAGTGTGAAATACC  
GAGGCTCAACTTCGGGCTGCAATTTGAACTGTTAGTCTTGGAGTGTGGAGAGGCGAGGCGGAATTCCAGTGTAGCGGTG  
AAATGCATAGAGATTGGGAGGAACACCAAGTGGCGAAGGCGGCTGCTGGACATTAACGACGCTGAGGAGCGAAAGTGTG  
GGGAG  
>ASV:3372:Kingdom:Bacteria  
TACGTAGGGGGCAAGCGTTGTCCGGAATAATTGGGCGTAAAGGGCGCGTAGGCGGCTCGGTAAGTCTGGAGTAAAAGTCC  
TGCTTTTAAAGTGGGAATTGCTTTGGATACTGCTGGGCTTGGAGTGCAGGAGAGGTTAGTGAATTCCAGTGTAGCGGTG  
GAATGCTTAGATATCACACAGAACACCGATTGCGAAGGCAGCTTCCAAGCTATTACTGACGCTGAGGCACGAAAGCATG  
GGTAG  
>ASV:3373:Family:Lachnospiraceae  
AACGTAGGTACAAGCGTTGTCCGGAATTTACTGGGTGTAAGGGGAGCGTAGACGGCTGTGCAAGTCTGAAGTAAAAGGCA  
TGGGCTCAACCTGTGGACTGCTTTGAAACTGTGCAGCTAGAGTGTCCGAGAGGTAAGTGAATTCTAGCGTGTAGCGGTG  
AAATGCGTAGATATCGGAGGAACACCAAGTGGCGAAGGCGGCTTACTGGGCACCAACTGACGCTGAGGCTCGAAAGTGTG  
GGTAG  
>ASV:3374:Family:Lachnospiraceae  
TACGTAGGTGCAAGCGTTGTCCGGATTTACTGGGTGTAAGGGGAGCGCAGGCGGTGCGGCAAGTCAAGTGTGAAAACCC  
GGGGCTCAACCCCGGACTGCAATTTGAACTGCCGACTAGAGTGCAGGAGAGGTAAGTGAATTCTAGTGTAGCGGTG  
AAATGCGTAGATATCAGGAAGAATCCGATTGCGAAGGCAGCTTCTGGACTGTAGCTGACGCTGATGCTCGAAAGTGTG  
GGTAT  
>ASV:3375:Family:Ruminococcaceae

AACGTAGGTCACAAGCGTTGTCCGGAATTACTGGGTGTAAAGGGAGCGTAGGCGGGCAGGCAAGTCAGGCGTGAAATATA  
TCGGCTCAACCGGTAACGGCGCTTAAAGTGCAGGCTTGTAGTGAAGTAGAGGTTGGCGGAATTCCTAGTGTAGCGGTGA  
AATGCGTAGATATTAGGAGGAACACCAGTGGCGAAGGCGGATTGCTGGACAGCAACTGACGGTGAGGCGCGAAAGTGTGG  
GGAG

>ASV:3376:Genus:Barnesiella

TACGGAGGATGCGAGCGTTATCCGGATTTATTGGGTTAAAGGGTGCCTAGGCGGCACGCCAAGTCAGGCGTGAAATTC  
CGGGCTCAACTCGGAGTGTGCCGTTGAAACTGGCGAGCTAGAGTACACAAGAGGCGAGCGGAATGCGTGGTGTAGCGGTG  
AATGCTTAGATATTAGGAGGAACACCAGTGGCGAAGGCGGCTTGTGGACAGTAACGACGTTGAGGCTCGAAAGCGTG  
GGAG

>ASV:3377:Genus:Roseburia

TACGTAGGGGGCAAGCGTTATCCGGATTTACTGGGTGTAAAGGGAGCGCAGGCGGCATGATAAGTCTGATGTGAAAACCC  
AAGGCTCAACCATGGGACTGCATTGGAAGTGTCTGCTGGAGTGTGCGAGAGGTGAGCGGAATTCCTAGTGTAGCGGTG  
AATGCGTAGATATTAGGAGGAACACCAGTGGCGAAGGCGGCTTACTGGACGATGACTGACGCTGAGGCTCGAAAGCGTG  
GGAG

>ASV:3378:Genus:Paraprevotella

TACGGAGATGCGAGCGTTATCCGGATTTATTGGGTTAAAGGGAGCGTAGGCGGGCTTTAAGTCAGGCGTCAAATGTC  
ACGGCTCAACCGTGGCCAGCGGTTGAAACTGCAAGCCTTGTAGTCTGCACAGGGCACATGGAATTCGTGGTGTAGCGGTGA  
AATGCTTAGATATACGAAGAACTCCGATTGCGAAGGCGAGCTTGTGGACTGTAACGACGCTGATGCTCGAAAGTGTGG  
GTATC

>ASV:3379:Genus:Bacteroides

TACGGAGGATCCGAGCGTTATCCGGATTTATTGGGTTAAAGGGAGCGTAGGTGGATTGTTAAGTCAGTTGTGAAAGTTT  
GCGGCTCAACCGTAAATTCAGTTGAAACTGGCAGTCTTGTAGTGCAGCAGAGGTAGGCGGAATTCGTGGTGTAGCGGTG  
AATGCTTAGAGATCATACGAACACCAGTGGCGAAGGCGGCTTACCAAATATATCTGACGTTGAGGCGCGAAAGCGTG  
GGAG

>ASV:3380:Family:Ruminococcaceae

TACGTAGGTGGCAAGCGTTGTCCGGATTTACTGGGTGTAAAGGGAGCGCAGGCGGGAAGACAAGTTGGAAGTGAAATCCA  
TGGGCTCAACCATGAAGTGTCTTCAAAGTGTCTTGTAGTAGTGCAGAGGTAGGCGGAATTCCTGGTGTAGCGGTG  
GAATGCGTAGATATCGGGAGGAACACCAGTGGCGAAGGCGGCTTCTGGACTGTGTCTGACGCTGAGATGCGAAAGCCAG  
GGTAG

>ASV:3381:Genus:Subdoligranulum

AACGTAGGTCACAAGCGTTGTCCGGAATTACTGGGTGTAAAGGGAGCGCAGGCGGGGAGAACAAGTTGGAAGTGAAAACCTA  
TGGGCTCAACCCATAAATTGCTTTCAAAGTGTCTTGTAGTAGTGCAGAGGTAGGTGGAATTCCTGGTGTAGCGGTG  
GAATGCGTAGATATCGGGAGGAACACCAGTGGCGAAGGCGGCTTACTGGGCACCAACTGACGCTGAGGCTCGAAAGTGTG  
GGTAG

>ASV:3382:Genus:Subdoligranulum

ACCTTCTTTTCCCTCTTTTCTTCTTCTGGGTGTAAAGGGAGCGCAGGCGGACCGGCAAGTTGGAAGTGAAAACCTA  
TGGGCTCAACCCATAAATTGCTTTCAAAGTGTCTTGTAGTAGTGCAGAGGTAGGTGGAATTCCTGGTGTAGCGGTG  
GAATGCGTAGATATCGGGAGGAACACCAGTGGCGAAGGCGGCTTACTGGGCACCAACTGACGCTGAGGCTCGAAAGCATG  
GGTAG

>ASV:3383:Order:Bacteroidales

TACGGAGGATCCAAGCGTTATCCGGATTTATTGGGTTAAAGGGAGCGTAGGTGGACAGTTAAGTCAGTTGTGAAAGTTT  
GCGGCTCAACCGTAAATTCAGTTGAAACTGGCAGTCTTGTAGTACAGTAGAGGTGGCGGAATTCGTGGTGTAGCGGTG  
GAATGCGTAGATATCGGGAGGAACACCAGTGGCGAAGGCGGCTTACTGGGCACCAACTGACGCTGAGGCTCGAAAGCATG  
GGTAG

>ASV:3384:Genus:Butyricimonas

TACGGGGGATGCGAGCGTTATCCGGATTTATTGGGTTAAAGGGCGCGTAGGCGGGACGCCAAGTCAGGCGTAAAAGACT  
GCAGCTAAACCTGAGCAGCGGCTTAAAGTGGCAGCTTGTAGTACAGTAGAGGTGGCGGAACAAAGTGAAGTAGCGGTGA  
AATGCTTAGATATCACTTGAACCCGATAGCGAAGGCGAGCTTCCAGGCTCGTCTGACGCTGATGCGCGAGAGCGTGG  
GTAGC

>ASV:3385:Genus:Pantoea

TACGGAGGTCGAAGCGTTAATCGGAATTACTGGGCGTAAAGCGCACGAGGCGGCTGTGTTAAGTCAGATGTGAAATCCC  
CGGGCTTAACCTGGGAAGTGCATTTGAAACTGGCAGGCTTGTAGTCTTGTAGAGGGGGGTAGAATTCAGGTGTAGCGGTG  
AATGCGTAGAGATCTGGAGGAATACCGGTGGCGAAGGCGGCCCCCTGGACAAGACTGACGCTCAGGTGCGAAAGCGTG  
GGAG

>ASV:3386:Genus:Bacteroides

TACGGAGGATCCGAGCGTTATCCGGATTTATTGGGTTAAAGGGAGCGTAGGTGGATTGTTAAGTCAGTTGTGAAAGTTT  
GCGGCTCAACCGTAAATTCAGTTGAAACTGGCAGTCTTGTAGTACAGTAGAGGTGGCGGAATTCGTGGTGTAGCGGTG  
AATGCTTAGATATCGGGAGGAACACCAGTGGCGAAGGCGGCTTACTGGGCACCAACTGACGCTGAGGCTCGAAAGTGTG  
GGTAG

>ASV:3387:Family:Fusobacteriaceae

TACGGAGGATCCGAGCGTTATCCGGATTTATTGGGTTAAAGGGAGCGTAGACGGCATGGCAAGCCAGATGTGAAAGCCC  
GGGGCTCAACCCAGGACTGCGTTGGAAGTGTAAACTAGAGTACTGGAGAGGTAGGCGGAATTCCTGGTGTAGCGGTG  
AATTCGTAGATATTTGTAGGAATGCCGATGGGAAGCCAGCCTTACTGGACAGATACTGACGCTAAAGCGCGAAAGCGTG  
GGTAG

>ASV:3388:Genus:Alistipes

TACGGAGGATCAAGCGTTATCCGGATTTATTGGGTTAAAGGGTGCCTAGGCGGTTTGATAAGTTAGAGGTGAAATCCC  
GGGGCTTAACCCAGGACTGCCTCTAATACTGTTAGACTAGAGAGTGTGCGGTAGGCGGAATGTATGGTGTAGCGGTG  
AATGCGTAGATATTAGGAGGAACACCAGTGGCGAAGGCGGCTTACTGGACAGTAACGACGTTGAAGCTCGAAAGCGTG

GGGAG  
>ASV:3389:Species:haemolyticus  
TACGTAGGTGGCAAGCGTTATCCGGATTATTGGGCGTAAAGCGCGGTAGGCGGTTTTTAAAGTCTGATGTGAAAACCC  
ACGGCTCAACCCCGAAGCCCGGAACCTCCGCGCTTGGGTCCGGTAGGGGAGGGTGAACACCCGGTGTAGCGGTG  
AATGCGCAGAGATATGGAGGAACACCAGTGGCGAAGGCGACTTCTGGTCTGTAACGACGCTGATGTGCGAAAGCGTG  
GGAT  
>ASV:3390:Genus:Collinsella  
TACGTAGGGGCGAGCGTTATCCGGATTATTGGGCGTAAAGCGCGGTAGGCGGCCCGGAGCCGGGGTGAAGCGG  
GGGGCTCAACCCCGAAGCCCGGAACCTCCGCGCTTGGGTCCGGTAGGGGAGGGTGAACACCCGGTGTAGCGGTG  
GAATGCGCAGATATCTGGAAGAACACCAGTGGCGAAGGCGCCTTCTGGGCTCGACTGACGCTGAGGAGCGAAAGCTGG  
GGAG  
>ASV:3391:Family:Streptococcaceae  
TACGTAGGTCCGAGCGTTATCCGGATTATTGGGCGTAAAGCGAGCGAGGCGGTTGATAAGTCTGAAGTTAAAGGCT  
GTGGCTCAACCATAGTTCGTTTGGAAACTGTCAAACCTTGGTGCAGAGGGGAGAGTGAATTCCATGTGTAGCGGTGA  
AATGCGTAGATATCGGGAAGAACACCAATGGCGAAGGCGAGTCTCTGGGCCCTTACTGACGCTGAGGAGCGAAAGCTGG  
GGAG  
>ASV:3392:Family:Ruminococcaceae  
TACGTAGGTGGCAAGCGTTATCCGGATTACTGGGTGTAAGGGAGCGTAGGCGGGAATGCAAGTCCGATGTGAAAACCTA  
TGGGCTTAACCCATAGCCTGCATTGAAACTGTATTTCTTGGTGAAGTAGAGGTTGGCGGAATCCCGGTGTAGCGGTG  
AATGCGTAGATATCGGAGGAACACCAGTGGCGAAGGCGGCAACTGGGCTTTACTGACGCTGAGGCTCGAAAGCATG  
GGAG  
>ASV:3393:Genus:Dielma  
TACGTAGGTGGCAAGCGTTATCCGGATTATTGGGCGTAAAGGGTGCCTAGGCGGCGAGATAAGTCTGAGGTAAAAGCC  
GTGGCTCAACCCAGGTAAGCCTTGGAAACTGTCTGGTGGAGTGCAGGAGAGGACAATGGAATTCCATGCGTAGCGGTAA  
AATGCGTAGATATATGGAGGAACACCAGTGGCGAAGGCGGTTGTCTGGCCTGTAACGACGCTGAAGCACGAAAGCTGG  
GGAG  
>ASV:3394:Family:Ruminococcaceae  
TACGGAGGATCCGAGCGTTATCCGGATTACTGGGTGTAAGGGCGTGTAGGCGGGATTGCAAGTCCAGTGTGAAAACCTG  
GGGCTCAACCTCCAGCCTGCATTGAAACTGTAGTTCTTGGTGGAGAGGCAATCGGAATCCGTGTGTAGCGGTG  
AATGCTTAGATATACGAAGAACTCCGATTGCGAAGGCGAGTCACTAGACTGTCACGACTGATGCTCGAAAGTGTG  
GGTAT  
>ASV:3395:Genus:Parabacteroides  
TACGGAGGATCCGAGCGTTATCCGGATTATTGGGTTAAAGGGTGCCTAGGCGGCCTTTAAAGTCCAGCGGTGAAAGTCT  
GTGGCTCAACCATAGAATTGCCGTTGAAACTGGGGGCTTGGTATGTTTGGAGGCGGGAATGCGTGGTGTAGCGGTG  
AATGCGTAGATATTAGGAGGAACACCAGTGGCGAAGGCGGCTTACTGGACGATAACGACGTTGAGGCTCGAAAGCGTG  
GGAG  
>ASV:3396:Genus:Ruminococcaceae\_UCG-004  
TACGTAGGGAGCAAGCGTTATCCGGATTACTGGGTGTAAGGGCGTGTAGGCGGAAAGCAAGTCCAGTGTGAAAACCA  
GGGGCTCAACCTCTGGCCTGCATTGAAACTGTCTTCTTGGTGGAGAGGCGGGAATCCGTGTGTAGCGGTG  
AATGCGTAGATATACGGAGGAACACCAGTGGCGAAGGCGGCTGCTGGACGCAACTGACGCTGAGGCGCGAAAGCGTG  
GGAG  
>ASV:3397:Genus:UBA1819  
AACGTAGGGTGAAGCGTTATCCGGATTACTGGGTGTAAGGGAGCGCAGGCGGATTGGCAAGTTGGGAGTGAATCTA  
TGGGCTCAACCCATAAATTGCTTTCAAACCTGTCAGTCTTGGTGGTGTAGAGGTAGGCGGAATCCCTAGTGTAGCGGTG  
AATGCTTAGATATACGAAGAACTCCGATTGCGAAGGCGAGTCACTAGACTGTCACGACTGATGCTCGAAAGTGTG  
GGTAT  
>ASV:3398:Family:Lachnospiraceae  
TACGTATGGGGCAAGCGTTATCCGGATTACTGGGTGTAAGGGAGCGTAGACGGAAGCAAGTCTGATGTGAAAAGGCT  
GGGGCTTAACCCGGGACTGCATTGAAACTGTCTTCTTGGTGGAGAGGTAAGCGGAATCCCTAGTGTAGCGGTG  
AATGCGTAGATATACGCAAGAACTCCGATTGCGAAGGCGAGTCACTAAACCATAACTGACACTGAAGCACGAAAGCGTG  
GGAT  
>ASV:3399:Family:Prevotellaceae  
TACGGAGGATCCGGGCGTTATCCGGATTATTGGGTTAAAGGGAGCGTAGGCGCTGTTAAGCGTGTGTGAAATGTC  
GTGGCTCAACCCGGGACTGCAGCGCAACTGGCAGACTTGGTGCACGGTAGGAAGGCGGAATCCGTGCTGTAGCGGTG  
AATGCGTAGAGATTAGGAAGAACACCAGTGGCGAAGGCGACTTCTGGACGCAACTGACGCTGAGGCGCGAAAGCGTG  
GGAG  
>ASV:3400:Order:Clostridiales  
TACGGGGGATGCGAGCGTTATCCGGATTACTGGGTGTAAGGGGCGGTAGGCGGGAATGCAAGTCCAGTGTGAAATCCA  
AGGGCTCAACCCCTTGAAGTGCATTGAAACTGTATTTCTTGGTGGTGGAGAGGTTGACGGAATCCCTAGTGTAGCGGTG  
AATGCGTAGATATTACGAAGAACTCCGATTGCGAAGGCGAGTCACTAGACTGTCACGACTGATGCTCGAAAGTGTG  
GGTAT  
>ASV:3401:Family:Lachnospiraceae  
TACGGAGGATCCGAGCGTTATCCGGATTACTGGGTGTAAGGGAGCGTAGACGGAAGTGAAGTCTGAAGTGAAGCCC  
GGGGCTCAACCCGTACTGCTTTGAAACTGTCTTCTAGAGTGTGGAGAGGTAAGCGGAATCCCTAGTGTAGCGGTG  
AATGCGTAGATATTAGGAGGAACATCAGTGGCGAAGGCGGCTTACTGGGCAACACTGACGCTGAGGCTCGAAAGTGTG  
GGTAG  
>ASV:3402:Genus:Lachnospira  
TACGTATGGAGCAAGCGTTATCCGGATTACTGGGTGTAAGGGAGTGTAGGTGGCCAGGCAAGTCCAGTGTGAAAACCC

GGGGCTCAACCCGGGACTGCTTTTAAACTGCAGGGCTAGAGTGCAGGAGGGCAAGTGAATTCCTAGTGTAGCGGTG  
AAATGCGTAGATATTAGGAGGAACACCAGTGGCGAAGGCGGCTTTCTGGACTGAAACTGACACTGAGGCACGAAAGCGTG  
GGGAG

>ASV:3403:Genus:Christensenellaceae\_R-7\_group

TACGTAGGGGGCGAGCGTTGTCCGGAATGACTGGGCGTAAAGGGCGTGTAGGCGGCCGACTAAGTCTGATGTGAAATACC  
CGCTTTCAAGTGGGTGCGTGCATTGAAACTGGATGGCTAGAGTGCAGGAGAGGTAAGTGAATTCAGTGTAGCGGTG  
AAATGCGTAGAGATTGGGAGGAACACCAGTGGCGAAGGCGACTTACTGGCCGCAACTGACGCTGAGGCACGAAAGCGTG  
GGGAG

>ASV:3404:Genus:Parabacteroides

TACGGAGGATCCGAGCGTTATCCGGATTTATTGGGTTAAAGGGTGCCTAGGCGGCCCTTTAAGTCAGCGGTGAAAGTCT  
GTGGCTCAACCATAGATTGCCGTTGAAACTGGGGGCTTGGATGATGTTTGAGGCAGCGGAAATGCGTGGTGTAGCGGTG  
AAATGCATAGATATCACGAAGAACTCCGATTGCGAAGGCAGCTACTGGAGCGCAACTGACGCTGAAGCTCGAAAGTGCG  
GGTAT

>ASV:3405:Family:Peptococcaceae

TACGTAGGGAGCAAGCGTTGTCCGGAATTACTGGGCGTAAAGGGCGCGTAGGCGGGAATTTAAGTTAGATGTGAAAATA  
AGGGCTCAACCTTTAGACTGCATTTAAACTGGATTTCTTGGAGGCGAGGAGGAAAGTGAATTCAGTGTAGCGGTG  
AAATGCGTAGATATTAGGAGGAACATCAGTGGCGAAGGCGACTTTCTGGACTGTACCTGACGTTGATGCGCGAAAGCGTG  
GGGAG

>ASV:3406:Genus:Alistipes

TACGGAGGATCAAGCGTTATCCGGATTTATTGGGTTAAAGGGTGCCTAGGCGGTTTGATAAGTTAGAGGTGAAATTC  
GGGGCTCAACCTGAGCGTGCCTCTAATACTGTTGAGCTAGAGAGTAGTTGCGGTAGGCGGAAATGTATGGTGTAGCGGTG  
AAATGCGTAGATATACGGAGGAACACCAGTGGCGAAGGCGGATTGCTGGACAGTAACGACGCTGAGGCACGAAAGCGTG  
GGGAG

>ASV:3407:Order:Clostridiales

TACGTAGGGGGCGAGCGTTGTCCGGAATTACTGAGCGTAAAGGGCGCGCAGGCGGCCATCAAGTCAGATGTGAAACCCC  
CGGGCTTAACCTGGGAACTGCATTTGAAACTGGTTGGCTTGGTGCAGGAGAGGAAAGCGGAAATTCAGTGTAGCGGTG  
AAATGCGTAGATATTAGGAAGAACACCAGTGGCGAAGGCGGCTTTCTGGACTGCAACTGACGCTGAGGCACGAAAGCGTG  
GGGAG

>ASV:3408:Genus:DNF00809

TACGTAGGGGGCGAGCGTTATCCGGATTCATTGGGCGTAAAGCGCGCTAGGCGGCCCTAAGCGGGACCTTAACCTT  
GGGGCTCAACCTCAAGCCGGTCCCGACTGGGCGGCTCGAGTTCCGTAGAGGCAGGCGGAAATTCCTGGTGTAGCGGTG  
AATGCGCAGATATCGGAAGAACACCAGTGGCGAAGGCAGCTGCTGGCCGCAACTGACGCTGAGGCACGAAAGCTGGG  
GGAGC

>ASV:3409:Genus:Acetanaerobacterium

TACGTAGGTGCAAGCGTTGTCCGGAATTACTGGGTGTAAGGGAGCGTAGGCGGCTTGCAAGTTGAATGTTAAACTA  
TCGGCTCAACTGGTAGTCGCTTCAAACCTGCAGGACTTGGTGAAGTAGAGGCAGGCGGAAATTCCTGGTGTAGCGGTG  
AATGCGTAGATATCGGGAGGAACACCAGTGGCGAAGGCGGCTGCTGGGCTTTACTGACGCTGAGGCTCGAAAGTGTG  
GGAGC

>ASV:3410:Family:Lachnospiraceae

TACGTAGGGGGCAAGCGTTATCCGGAATTACTGGGTGTAAGGGTGCCTAGGTTGGTATGGCAAGTCAGAAGTAAAACCC  
AGGGCTTAACCTGGGACTGCTTTTAAACTGTCAGACTAGAGTGCAGGAGAGGTAAGCGGAAATTCGTGGTGTAGCGGTG  
AAATGCTTAGATATCACGAAGAACTCCGATTGCGAAGGCAGCTTCTGGACTGTAACGACGCTGATGCTCGAAAGTGTG  
GGTAT

>ASV:3411:Order:Bacteroidales

TACGGAGGATCCGAGCGTTATCCGGATTTATTGGGTTAAAGGGAGCGTAGGCGGACGCTTAAGTCAGTTGTGAAAGTTT  
GCGGCTCAACCGTAAATTCAGTTGGTACTGTGTCTTGGTACAGTAGAGGTGGGCGGAAATTCGTGGTGTAGCGGTG  
GAATGCGTAGATATCGGGAGGAACACCAGTGGCGAAGGCGACTACTGGGCACCAACTGACGCTGAGGCTCGAAAGCATG  
GGTAG

>ASV:3412:Family:Ruminococcaceae

TACGTAGGGAGCGAGCGTTGTCCGGAATGACTGGGTGTAAGGGAGCGTAGGCGGGATGGCAAGTCAGATGTGAAACCTG  
AGGGCTCAACCTTCAACTGCATTTGAAACTGCTGTTCTTGGTGAAGTAGAGGTAAGCGGAAATTCCTGGTGTAGCGGTG  
AAATGCTTAGATATCACGAAGAACTCCGATTGCGAAGGCAGCTACTGGACTGCAACTGACACTGATGCTCGAAAGTGCG  
GGTAT

>ASV:3413:Genus:Erysipelatoclostridium

TACGTAGGTGGCGAGCGTTATCCGGAATTATTGGGCGTAAAGGGAGCGAGGCGGGCAGAGGTCTGTGGTGAAGACT  
GAAGCTTAACCTCAGTAAGCCATAGAAACCGGCTGCTAGAGTGCAGGAGAGGATCGTGAATTCATGTGTAGCGGTG  
AATGCGTAGATATTAGGAGGAACACCAGTGGCGAAGGCGACTTACCAAATATATCTGACGTTGAGGCACGAAAGCGTGG  
GGAGC

>ASV:3414:Species:multacida

TACGTAGGTGGCGAGCGTTGTCCGGAATTATTGGGCGTAAAGGGAGCGCAGGCGGGAGGTCAAGTCTATCTTAAAAGTGC  
GGGGCTCAACCCGTGAGGGGATGGAACTGCTCTTCTTGGTGCAGGAGAGGAAAGCGGAAATTCCTAGTGTAGCGGTG  
AATGCGTAGATATTAGGAGGAACACCAGTGGCGAAGGCGGCTTTCTGGACTGTAACGACGCTGAGGCTCGAAAGCGTGG  
GGAGC

>ASV:3415:Family:Lachnospiraceae

TACGTAGGGGGCAATCGTTATCCGGATTTACTGGGTGTAAGGGAGCGTAGACGGTGTGGCAAGTCTGATGTGAAAGGCA  
TGGGCTCAACCTGTGGACTGCATTGAAACTGTCATACCTTGGTGCAGGAGGGTAAGCGGAAATTCCTAGTGTAGCGGTG  
AAATGCTTAGATATCACGAAGAACTCCGATTGCGAAGGCAGCTGCTAAGCTGCAACTGACATTGAGGCTCGAAAGTGTG  
GGTAT

>ASV:3416:Order:Gastranaerophilaes  
TACGGGGGTGCAAGCGTTGTCCGGAATCATTGGGCGTAAAGAGTTCGTAGGCGGCATGTCAAGTCTGGTGTTAAATCCT  
GAGGCTCAACTTCAGTTCAGCACTGGATACTGGCAAGCTAGAATGCGGTAGAGGTAAGGGAATTCCTGGTGTAGCGGTG  
AAATGCGTAGATATCAGGAAGAACCACCGGTGGCGTAAGCGCTTTACTGGGCCGTTATTGACGCTGAGGAACGAAAGCCGG  
GGGAG

>ASV:3417:Genus:Asaccharospora  
TACGGAGGATCCAAGCGTTATCCGGATTTACTGGGCGTAAAGGGTGCCTAGGCGGTCTTTTAAAGTCAGGAGTGAAAGGCT  
ACGGCTCAACCGTAGTAAGCTTTGAACTGGAGACTTGAGTGCAGGAGAGGAGTGGAATTCCTAGTGTAGCGGTGA  
AATGCTTAGATATCACGAAGAACCCTCGATTGCGAAGGCAGCTCACTAGACTGTCACTGACACTGATGCTCGAAAGTGTGG  
GTATC

>ASV:3418:Family:Lachnospiraceae  
TACGTATGGTGCAAGCGTTATCCGGATTTACTGGGTGTAAGGGAGCGTAGGCGGCACGCCAAGCCAGATGTGAAAGCCC  
GAGGCTTAACCTCGCGGATTGCAATTTGAACTGGCGAGCTAGAGTACAGGAGAGGAAAGCGGAATTCCTAGTGTAGCGGT  
GAAATGCGTAGATATTAGGAAGAACCACAGTGGCGAAGGCGGCTGCTGGACATTAAGTACGCTGAGGCGCGAAAGCGT  
GGGA

>ASV:3419:Genus:Marvinbryantia  
TACGTAGGGGCGAGCGTTATCCGGATTTACTGGGTGTAAGAGAGCGTAGACGGCGTATCAAGTCTGATGTGAAAGGCA  
GGGGCTTAACCTCGCGGATTGCAATTTGAACTGGCGAGCTAGAGTGCAGGAGAGGTAAGCGGAATTCCTAGTGTAGCGGTG  
AAATGCGTAGATATTAGGAGGAACACCAGTGGCGAAGGCGGATTGCTGGACGATAACTGACGGTGAGGCGCGAAAGTGTG  
GGGAG

>ASV:3420:Family:Lachnospiraceae  
TACGTAGGGGCGAAGCGTTATCCGAATTTACTGGGTGTAAGGGAGCGTAGACGGCGACGCAAGTCTGGAGTGAAAGCCC  
GGGGCTCAACCCGGGACTGCTTTGAACTGGCTGCTGGAGTGCAGGAGAGGTAAGTGAATTCCTAGTGTAGCGGTG  
AAATGCGTAGATATTAGGAGGAACACCAGTGGCGAAGGCGGCTTACTGGACTGTAAGTACGCTTGGGCTCGAAAGCGTG  
GGGAG

>ASV:3421:Order:Bacteroidales  
TACGGAGGATCCGAGCGTTATCCGGATTTATTGGGTTAAAGGGAGCGTAGGCGGATTGTTAAGTCAGTTGTGAAAGTTT  
GCGGCTCAACCGTAAATTCAGTTGATACTGGCAGTCTTGGAGTGCAGTAAAGGTGGGCGGAATTCAGTGTAGCGGTG  
AAATGCGTAGATATTGAGGGAACACCAGTGGCGAAGGCGGCAACTGGGCTTAACTGACGCTGAGGCTCGAAAGTGTG  
GGGAG

>ASV:3422:Genus:Actinomyces  
TACGTAGGGGCGAGCGTTGTCCGGAATTTATTGGGCGTAAAGGGCTTGTAGGTGGTGGTCCGCTGCTCCGTGAAATCCT  
CTGGCTTAACCTGGGGCGTGGGTTGACTGGGCTGGCTTGGAGTGCAGGAGGAGACTGGAATTCCTGGTGTAGCGGTG  
GAATGCGCAGATATCAGGAGGAACACCAGTGGCGAAGGCGGCTCTGGGCCGTTACTGACGCTGAGGAGCGAAAGCGTG  
GGGAG

>ASV:3423:Genus:Parabacteroides  
TACGGAGGATCCGAGCGTTATCCGGATTTATTGGGTTAAAGGGTGCCTAGGCGGCCTTTTAAAGTCAGCGGTGAAAGTCT  
GTGGCTCAACCATAGAATTGCGGTTGAACTGGGGGCTTGGAGTATGTTTGGAGGAGGCGGAATGCGTGGTGTAGCGGTG  
AAATGCATAGATATCACGCAGAACCCGATTGCGAAGGCAGCTGCCAAGCTATGACTGACGCTGATGCACGAAAGCGTG  
GGGAT

>ASV:3424:Genus:Pygmaibacter  
AACGTAGGTGGCAAGCGTTGTCCGGAATTTACTGGGTGTAAGGGAGCGCAGGCGGAGCGGAAGTTGGAAGTAAATACA  
TGGGCTCAACCCATGAACTGCTTTCAAACCTGCTGGTCTTGGAGTGGTGCAGAGGTAGGCGGAATTCCTGGTGTAGCGGTG  
GAATGCGTAGATATCAGGAGGAACACCAGTGGCGAAGGCGGCTGCTGGGCACTAACTGACGCTGAGGCTCGAAAGTATG  
GGGAG

>ASV:3425:Genus:Ruminiclostridium  
TACGTAGGGAGCGAGCGTTGTCCGGAATTTACTGGGTGTAAGGGCGTGTAGGCGGGATTGCAAGTCAGATGTGAAATCCT  
GGGGCTCAACCCGGAAGTGCATTTGAACTGTAGTCTTGGAGTACTGGAGAGGCGGCGGAATTCCTAGTGTAGCGGTG  
AAATGCGTAGATATTAGGAGGAACACCAGTGGCGAAGGCGGCTGCTGGACAGCAACTGACGCTGAGGCGCGAAAGCGTG  
GGGAG

>ASV:3426:Family:Lachnospiraceae  
TACGTAGGGGCGAAGCGTTATCCGGATTTACTGGGTGTATAGGAGCGTAGGCGGTCTGACAAGTCAGAAGTGAAAGCCC  
GGGGCTCAACTCCGGGACTGCTTTTGAAGTGCAGGACTAGATTGCAGGAGAGGTAAGTGAATTCCTAGTGTAGCGGTG  
AAATGCGTAGATATCACGAAGAACCCTCGATTGCGAAGGCAGCTGCTAAGCTGCAACTGACATTGAGGCTCGAAAGTGTG  
GGTAT

>ASV:3427:Family:Lachnospiraceae  
TACGGAGGATCCGAGCGTTATCCGGATTTATTGGGTTAAAGGGAGCGCAGGTGGTATGGCAAGTCAGAAGTGAAACCCA  
GGGCTTAACTCTGGGACTGCTTTTGAAGTGTGAGTGTAGGAGAGGTAAGCGGAATTCCTAGTGTAGCGGTG  
AATGCGTAGATATTAGGAGGAACACCAGTGGCGAAGGCGGCTTCTGGACGTTAACTGACGTTGAGGCTCGAAAGCGTG  
GGAGC

>ASV:3428:Genus:Pseudocheilatooccus  
TACGAAGGGGCTAGCGTTGTTCGGAATCACTGGGCGTAAAGGGCGCGTAGGCGGACGATTAAGTCAGGGGTGAAATCCC  
GGGGCTCAACCCGGAATTCCTTGGACTGCTTTGAGATTGGAAGAGGTAAGTGAATTCGAGTGTAGAGGTG  
AAATTCGTAGATATTGCAAGAACCACCGTGGCGAAGGCGACTTACTGGTCCATATCTGACGCTGAGGCGCGAAAGCGTG  
GGGAG

>ASV:3429:Species:acidovorans/cf./lacustris/tsuruhatensis  
TACGTAGGGTGCAGCGTTAATCCGGAATTTACTGGGCGTAAAGCGTGCAGGCGGTTATGTAAGACAGATGTGAAATCCC  
GGGGCTCAACCTGGGAACTGCATTTGTACTGCATGGCTAGAGTACGGTAGAGGGGGATGGAATTCCTGGTGTAGCAGT

AAATGCGTAGATATGCGGAGAACACCGATGGCGAAGCAATCCCCTGGACCTGACTGACGCTCATGCACGAAAGCGTG  
GGAG  
>ASV:3430:Genus:UBA1819  
TACGTAGGATGCAAGCGTTATCCGGATTTACTGGGTGTAAGGGAGCGCAGGCGATTGGCAAGTTGGGAGTAAAATCTA  
TGGGCTCAACCATAAATTGCTTTCAAACCTGTCAGTCTTGGTGTAGAGGTAGCGGAATCCCAGTGTAGCGGTG  
AAATGCTTAGATATCACGAAGAACTCCGATTGCGAAGGCAGCCTGCTGGACTGTAACGACGCTGATGCTCGAAAGTGTG  
GGTAT  
>ASV:3431:Family:Lachnospiraceae  
TACGTAGGGTCAAGCGTTATCCGGATTTACTGGGTGTAAGGGAGCGTAGACGGCATGGCAAGCCAGATGTGAAAGCCC  
GGGGCTCAACCCGGGACTGCATTTGAACTGTCAGGCTAGAGTGTGCGAGAGGAAAGCGGAATTCCTAGTGTAGCGGTG  
AAATGCGTAGATATCACGAAGAACTCCGATTGCGAAGGCAGCCTGCTAAGCTGCAACTGACATTGAGGCTCGAAAGTGTG  
GGTAT  
>ASV:3432:Genus:Akkermansia  
TACGTATGGTCAAGCGTTGTTCCGAATCACTGGGCGTAAAGCGTGCCTAGGCTGTTTCGTAAGTCGTGTGTGAAAGCGG  
CGGGCTCAACCCGGGACGGCAGCATGATACTGCGAGACTAGAGTAATGGAGGGGAACCGGAATTCCTGGTGTAGCAGTG  
AAATGCTTAGATATCACGAAGAACTCCGATTGCGAAGGCAGCCTGCTAAGCTGCAACTGACATTGAGGCTCGAAAGTGTG  
GGTAT  
>ASV:3433:Kingdom:Bacteria  
TACGGAGGATGCAAGCGTTATCCGGATTTACTGGGTGTAAGGGTGCCTAGGTGGCAAGGCAAGTCAGATGTGAAAGCCC  
GGGGCTCAACCCGGTACTGCATTTGAACTGCTAGCTAGAGTACAGTAGAGGTGGGCGGAATTCGTGGTGTAGCGGTG  
AAATGCTTAGATATCACGAAGAACTCCGATTGCGAAGGCAGCCTGCTAAGCTGCAACTGACATTGAGGCTCGAAAGTGTG  
GGTAT  
>ASV:3434:Genus:Christensenellaceae\_R-7\_group  
TACGTAGGTGGCAAGCGTTGTCGGAATAATTGGGCGTAAAGGGCGCGTAGGCGGCTCGGTAAGTCTGGAGTAAAAGTCC  
TGCTTTTAAAGTGGGAATTGCTTTGGATACTGTCGGGCTTGGTGCAGGAGAGGTTAGTGGAAATCCAGTGTAGCGGTG  
AAATGCATAGATATTACTCAGAACACCGATTGCGAAGGCATCTCACGAGGAGTTGATTGACGCTGAGGCACGAAAGCGTG  
GGAT  
>ASV:3435:Family:Muribaculaceae  
TACGGAGGATGCGAGCGTTATCCGGATTTATTGGGTTTAAAGGGTGCAGGCTGTGCATCAAGTCAGCGGTAAAATCTC  
GGGGCTCAACCCGTTTAGCCGTTGAAACTGGTGTGCTGGAGTGTGCGGAGGAAAGCGGAATTCGCGGTTAGCGGTGA  
AATGCATAGATATTGCGCAGAACTCCGATTGTGAAGGCAGCCTTCCAGTGCATGACTGACGCTGAGGCACGAAAGCGTG  
GTATC  
>ASV:3436:Genus:Alistipes  
TACGGAGGATCAAGCGTTATCCGGATTTATTGGGTTTAAAGGGTGCCTAGGCGGTTTGATAAGTTAGAGGTAAAATACC  
GGGGCTCAACTCCGGAAGTGCCTTAATACTGTTGAACTAGAGAGTAGTTGCGGTAGCGGAATTCGTGGTGTAGCGGTG  
AAATGCGTAGATATTAGGAGGAACACCGAGTGGCGAAGGCGGCTTTCTGGACTGAAACTGACACTGAGGCACGAAAGTGTG  
GGGAG  
>ASV:3437:Genus:Ruminococcaceae\_UCG-014  
TACGTAGGGAGCGAGCGTTATCCGGATTTATTGGGTGTAAGGGTGCCTAGACGGGAGTCTAAGTTAGTTGTGAAATCCC  
TCGGCTCAACTGAGGAACTGCAACTAAAACCTGGATTTCTTGGTGCAGGAGAGGAAAGCGGAATTCCTAGTGTAGCGGTG  
AAATGCGTAGATATTAGGAGGAACACCGAGTGGCGAAGGCGGCTTTCTGGACTGTAACGACGTTGATGCACGAAAGTGTG  
GGGAG  
>ASV:3438:Kingdom:Bacteria  
TACGGAGGATCAAGCGTTATCCGGATTTATTGGGTTTAAAGGGTGCCTAGGTTGGTATGGCAAGTCAGAAGTAAAACCC  
AGGGCTTAACTCTGGGACTGCTTTTGAACCTGTCAGACTGGAGTGCAGGAGAGGTAAGCGGAATTCCTAGTGTAGCGGTG  
AAATGCTTAGATATCACGAAGAACTCCGATTGCGAAGGCAGCCTGCTGGACTGTAACGACGCTGATGCTCGAAAGTGTG  
GGTAT  
>ASV:3439:Genus:Family\_XIII\_AD3011\_group  
TACGTAGGGGCAAGCGTTATCCGGAATTTATTGGGCGTAAAGAGTGCCTAGGTTGGTAACTTAAAGCGAGGGTTTAAAGCA  
ATGGCTCAACCATTTGTCGCCCTGCGAACTGGGCTACTTGGTGCAGGAGAGGAAAGCGGAATTCCTAGTGTAGCGGTGA  
AATGCGTAGATATTAGGAGGAACACCGAGTGGCGAAGGCGGCTTTCTGGACTGTAACGACACTGAGGCACGAAAGCGTGG  
GGAGC  
>ASV:3440:Family:Lachnospiraceae  
TACGAAGGGGCGAGCGTTGTTCCGGAATTTACTGGGTGTAAGGGAGCGTAGGCGGCATGGTAAGCCAGATGTGAAAGCCT  
TGGGCTTAAACCCGAGGATTGCATTTGAACTATCAAGCTAGAGTACAGGAGAGGAAAGCGGAATTCCTAGTGTAGCGGTG  
AAATGCGTAGATATCACGAAGAACTCCGATTGCGAAGGCAGCCTCACTGGACTGTTGACTGACACTGAGGCTCGAAAGTGTG  
GGTA  
>ASV:3441:Genus:Dielma  
TACGTAGGTGGCAAGCGTTATCCGGAATTTATTGGGCGTAAAGGGTGCCTAGGCGGTCGATAAGTCTGAGGTAAAAGTGT  
ACAGCTCAACTGTAATACGCCCTTGGAACTGTCGGACTAGAGTGCAGGAGAGGGCAATGGAATTCATGTGTAGCGGTAA  
AATGCGTAGATATTAGGAGGAACACCGAGTGGCGAAGGCGGTTGCTTGGCTGTAACGACGCTGAAGCACGAAAGCGTGG  
GGAGC  
>ASV:3442:Family:Lachnospiraceae  
TACGTAGGGTCAAGCGTTATCCGGAATTTACTGGGTGTAAGGGAGCGTAGGCGGCATGGTAAGCCAGATGTGAAAGCCT  
TGGGCTTAAACCCGAGGATTGCATTTGAACTATCAAGCTAGAGTACAGGAGAGGAAAGCGGAATTCGTGGTGTAGCGGTG  
AAATGCTTAGATATCACGAAGAACTCCGATTGCGAAGGCAGCCTCACTAGACTGTTACTGACACTGATGCTCGAAAGTGTG  
GGTAT  
>ASV:3443:Family:Lachnospiraceae

TACGTAGGGGGCAAGCGTTATCCGGATTTACTGGGTGTAAGGGAGCGCAGGCGGTGCGGCAAGTCTGATGTGAAAGCCC  
GGGGCTCAACCCCGGACTGCTTTGAAACTGTGCAGCTAGAGTGTGCGGAGAGGCAAGCGGAATTCCTAGTGTAGCGGTG  
AAATGCTTAGATATCACGAAGAAGTCCGATTGCGAAGGCAGCTTGTGACTGTAACGACGCTGATGCTCGAAAGTGTG  
GGTAT

>ASV:3444:Family:Lachnospiraceae

TACGTATGGTGCAGCGTTATCCGGATTTACTGGGTGTAAGGGAGCGCAGGCGGTGCGGCAAGTCTGATGTGAAAGCCC  
GGGGCTCAACCCCGTACTGCATTGAAACTGTGCTACTAGAGTGTGCGGAGGGTAAGTGAATTCCTAGTGTAGCGGTG  
AAATGCTTAGATATCACGAAGAAGTCCGATTGCGAAGGCAGCTTGTAGCTGCAACTGACATTGAGGCTCGAAAGTGTG  
GGTAT

>ASV:3445:Family:Lachnospiraceae

TACGTAGGGGGCAAGCGTTATCCGGATTTACTGGGTGTAAGGGAGCGTAGACGGCGAGACAAGTCTGAAGTGAAGCCC  
GGGGCTCAACCCCGGACTGCTTTGAAACTGCCTTGTGAGTGTGCGGAGAGTAAGTGAATTCCTAGTGTAGCGGTG  
GAAATGCGTAGATATTAGGAGGAACACCAGTGGCGAAGGCGGCTTACTGGACGATAACTGACGTTGAGGCTCGAAAGCGT  
GGGA

>ASV:3446:Genus:Anaerostipes

TACGTAGGGTGCAGCGTTATCCGGATTTACTGGGTGTAAGGGAGCGTAGACGGAGTGGAAGTCTGATGTGAAAACCC  
AGGGCTTAACCTGCGACTGCTTTGAAACTGTGAGTGTGCGGAGAGGTAAGCGGAATTCCTAGTGTAGCGGTG  
AAATGCGTAGATATTAGGAGGAACATCAGTGGCGAAGGCGGCTTACTGGACTGAAACTGACACTGAGGCACGAAAGCGTG  
GGAG

>ASV:3447:Genus:DTU089

TACGTAGGGAGCGAGCGTTGTCCGGATTTACTGGGTGTAAGGGTGCCTAGGCGGATCTGCAAGTCAAGTGTGAAATCCC  
AGGGCTTAACCTGGAAGTGTATTGAAACTGTGGGTCTTGTAGTGTAGGAGGAGGCGGGAATTCCTAGTGTAGCGGTG  
AAATGCTTAGATATCACGAAGAAGTCCGATTGCGAAGGCAGCTTGTAGCTGACGCTGACATTGAGGCTCGAAAGTGTG  
GGTAT

>ASV:3448:Species:profusa

TACGTAGGGGGCGAGCGTTATCCGGATTCATTGGGCGTAAAGCGCGCTAGGCGGCTGCTAGGTCGGGAGTCAAATCCG  
GGGGCTCAACCCCGTCCGCTCCGATACCGGCTGGCTTGTAGTGTAGGGGAAGTGAATTCCTAGTGTAGCGGTG  
AATGCGCAGATATTGGGAAGAACACCAGTGGCGAAGGCGGCTTCTGGCCACGACTGACGCTGAGGCGCAAAGCTAGG  
GGAG

>ASV:3449:Genus:Family\_XIII\_AD3011\_group

TACGTAGGGGGCAAGCGTTATCCGGATTTACTGGGTGTAAGAGTACGTAGGTGTTACCTAAGCAAGGGGTTAAGGCA  
ATGGCTTAACCTATTGTTCCGCTTGAAGTGGCTACTTGTAGTGTAGGAGAGGAAAGCGGAATTCCTAGTGTAGCGGTG  
AATGCGTAGATATTAGGAGGAACACCAGTGGCGAAGGCGGCTTCTGGACTGTAAGTGTGACACTGAGGTAACGAAAGCTG  
GGAG

>ASV:3450:Family:Lachnospiraceae

TACGTAGGGGGCAAGCGTTATCCGGATTTACTGGGTGTAAGGGAGCGTAGACGGCAAGCAAGTCTGAAGTGAAGCCC  
GGTGGCTCAACTGCGGACTGCTTTGAAACTGTTAGCTGGAGTGCAGGAGAGTAAGCGGAATTCCTAGTGTAGCGGTG  
AAATGCGTAGATATTAGGAGGAACACCAGTGGCGAAGGCGACTTCTGGACGAAACTGACGCTGAGGCGCAAAGCGTG  
GGAG

>ASV:3451:Genus:GCA-900066575

TACGTAGGGGGCAAGCATTATCCGGATTTACTGGGTGTAAGGGAGCGTAGGCGGTTTGACAAGTCAAGTGAAGGCC  
GTGGCTTAACCTGCGGACTGCTTTGAAACTGTGAGACTGGATTGCAGGAGAGTAAGCGGAATTCCTAGTGTAGCGGTG  
AAATGCGTAGATATTAGGAGGAACACCAGTGGCGAAGGCGGCTTACTGGACTGTAAGTGTGACGCTGAGGCTCGAAAGCGTG  
GGAG

>ASV:3452:Genus:Odobacter

TACGGAGGATGCGAGCGTTATCCGGATTTATTGGGTTAAAGGGTGCCTAGGCGGTTTATTAAGTGTAGGTTAAATATT  
TGAGCTAAACTCAATTGTGCCATTAATACTGTTAACTGGAGTACAGACGAGGTAGGCGGAATTCCTAGTGTAGCGGTG  
AATGCGTAGATATTAGGAGGAACATCAGTGGCGAAGGCGGCTTACTGGACTGAAACTGACACTGAGGCACGAAAGCGTG  
GGAG

>ASV:3453:Class:Bacteroidia

TACGTAGGGAGCAAGCGTTGTCCGGATTTACTGGGTGTAAGGGTGCCTAGGCGGCAAAACAAGTCAAGGCTGAAATCTG  
AGGGCTTAACCTCAACTGCGCTTGAAGTGTGTTTGTGCTTGTAGTGAAGTGTAGGAGGTAAGCGGAATTCCTAGTGTAGCGGTG  
AAATGCTTAGATATCACGAAGAAGTCCGATTGCGAAGGCAGCTTACTGGATTGTAAGTGTGACGCTGATGCTCGAAAGTGTG  
GGTAT

>ASV:3454:Order:Clostridiales

TACGTAGGGGGCGAGCGTTGTCCGGATTTACTGGGCGTAAAGGGTGCCTAGGCGGCTGAAAAGTCCGATGTGAAAGACC  
CGTGCTTAACATGGGGTTGCATCCGAAACTTTCGGCTTGTAGTGCAGGAGAGGCAAGTGAATTCCTAGTGTAGCGGTG  
AAATGCGTAGATATTGGGAGGAACACCAGTGGCGAAGGCGACTTGTGGCCGCAACTGACGCTGAGGCACGAAAGCGTG  
GGAG

>ASV:3455:Genus:Ruminococcaceae\_UCG-013

TACGTAGGGAGCGAGCGTTGTCCGGATTTACTGGGTGTAAGGGGCGCTAGGCGGCTGCAAGTCAAGTGTGAAATCC  
GGGGCTCAACCCCGGACTGCTTTGAAACTGTGGATCTTGTAGTGTGCGGAGAGGAAAGCGGAATTCCTAGTGTAGCGGTG  
AAATGCGTAGATATTAGGAGGAACACCAGTGGCGAAGGCGGCTTCTGGACCGTAACTGACGCTGAGGCGCAAAGTGTG  
GGAG

>ASV:3456:Family:Ruminococcaceae

TACGTAGGGAGCGAGCGTTGTCCGGATTTACTGGGTGTAAGGGGCGAGTAGGCGGGACAGCAAGTCAAGTGTGAAAACCTA  
TGGGCTTAACCATAGCCTGCTTTGAAACTGTTGTTCTTGTAGTGTGAGAGGCGGCGGAATTCCTAGTGTAGCGGTG  
AAATGCGTAGATATTAGGAGGAACACCAGTGGCGAAGGCGGCTTGTGGACATTAAGTGTGACGCTGAGGCGCAAAGCGTG

GGGAG

>ASV:3457:Genus:Ruminococcaceae\_UCG-014

TACGTAGGGGAGCAAGCGTTATCCGGATTTACTGGGTGTAAGGGGTCGTAGACGGGACAACAAGTTAGTTGTGAAATCCC  
TCGGCTTAACCTGAGGAAGTCAACTAAAACCTATTGTCTTGGAGTGTGGAGAGGAAAGTGAATTCTAGTGTAGCGGTG  
AAATGCGTAGATATCGGGAGGAACACCAGTGGCGAAGGCGGCTACTGGGCACCAACTGACGCTGAGGCCGAAAGTGTG  
GGTAG

>ASV:3458:Genus:Intestinimonas

TACGTAGGGGGCAAGCGTTATCCGGATTTACTGGGTGTAAGGGGTCGTAGGCGGGAGTCAAGTCAGATGTGAAAACCTA  
TGGGCTCAACCCATAGCCTGCATTTGAAACTGTACTTCTTGGAGTGTGGAGAGGCAGGCGGAATTCCTGTGTAGCGGTG  
AAATGCGTAGATATAGGGAGGAACACCAGTGGCGAAGGCGGCTGCTGGACATTAAGTACGCTGAGGCCGAAAGCGTG  
GGGAG

>ASV:3459:Genus:Lachnoclostridium

TACGTAGGGGGCAAGCGTTATCCGGATTTACTGGGTGTAAGGGGAGCTAGACGGCGAAGCAAGTCTGAAGTAAAAGCCC  
GGGGCTTAACCCGGGACTGCTTTGAAACTGTTTTGCTAGAGTGTGGAGAGGTAAGTGAATTCTAGTGTAGCGGTG  
AAATGCGTAGATATTAGGAGGAACACCAGTGGCGAAGGCGGCTACTGGACAGTAAGTACGCTTGGAGCTCGAAAGCGTG  
GGGAG

>ASV:3460:Family:Lachnospiraceae

TACGTAGGGGGCAAGCGTTATCCGGATTTACTGGGTGTAAGGGGAGCTAGACGGCATGGCAAGTCTGAAGTAAAACCC  
AGGGCTCAACCCGGGACTGCTTTGAAACTGTCAAGCTAGAGTGCAGGAGAGGTAAGCAGGAAATTCCTAGTGTAGCGGTG  
AAATGCGTAGATATTAGGAGGAACACCAGTGGCGAAGGCGGCTACTGGACTGTAAGTACGCTTGGAGCTCGAAAGCGTG  
GGGAG

>ASV:3461:Genus:Lachnospiraceae\_ND3007\_group

TACGTATGGTGCAAGCGTTATCCGGATTTACTGGGTGTAAGGGGAGTGTAGTGGCAAGGCAAGCCAGAAGTAAAACCC  
GGGGCTCAACCCGGGACTGCTTTGAAACTGTATGCTAGAGTGCAGGAGGGGTGAGCGGAATTCGTGGTGTAGCGGTG  
AAATGCTTAGATATCAGGAAGAACTCCGATTGCGAAGGCGGCTGCTAAGCTGCAACTGACATTGAGGCTCGAAAGTGTG  
GGTAT

>ASV:3462:Family:Ruminococcaceae

TACGTAGGTGGCAAGCGTTATCCGGATTTACTGGGTGTAAGGGGAGCGAGGCGGGGAAAGCAAGTACGCGGTGAAATACA  
TGGGCTTAACCCATGAAGTCCGCTTGAAGTGTCTTCTTGGAGTGAAGTAGAGGCAGGCGGAATTCAGTGTAGCGGTG  
AAATGCGTAGATATTAGGAGGAACACCAGTGGCGAAGGCGGCTGCTGGGCTTTACTGACGCTGAGGCTCGAAAGCGTG  
GGGAG

>ASV:3463:Genus:Ruminiclostridium\_9

TACGTAGGTGGCAAGCGTTATCCGGATTTACTGGGTGTAGAGGGGCTGTAGGCGGGAAAGCAAGTACAGATGTGAAAACCTG  
TGGGCTCAACCCACAGCCTGCATTGAAACTGTTTTCTTGGAGTGTGGAGAGGCAGATGGAATTCCTAGTGTAGCGGTG  
AAATGCGTAGATATTAGGAGGAACACCAGTGGCGAAGGCGGCTGCTGGACAGCAACTGACGCTGAGGCCGAAAGCGTG  
GGGAG

>ASV:3464:Family:Lachnospiraceae

TACGTAGGGGGCAAGCGTTATCCGGATTTACTGGGTGTAAGGGGAGCTAGACGGCACAGCAAGTCTGATGTGAAAAGCCC  
GGGGCTCAACCCGGAAGTGCATTGAAACTGCTGGGCTTGGAGTGCAGGAGAGGTAAGCAGGAAATTCCTAGTGTAGCGGTG  
AAATGCGTAGATATTAGGAGGAACACCAGTGGCGAAGGCGGCTACTGGACTGTAAGTACGCTTGGAGCTCGAAAGCGTG  
GGGAG

>ASV:3465:Family:Lachnospiraceae

TACGTATGGTGCAAGCGTTATCCGGATTTACTGGGTGTAAGGGGAGCTAGACGGATGGCAAGTCTGAAGTAAAAGCCC  
GGGGCTCAACCCGGGACTGCTTTGAAACTGTTTATCTAGAGTGTGGAGAGGTAAGTGAATTCTAGTGTAGCGGTG  
AAATGCGTAGATATTAGGAGGAACACCAGTGGCGAAGGCGGCTACTGGACAGTAAGTACGCTTGGAGCTCGAAAGCGTG  
GGGAG

>ASV:3466:Genus:Alistipes

TACGTATGGTGCAAGCGTTATCCGGATTTACTGGGTGTAAGGGGAGCTAGACGGATGGCAAGTCTGACGTGAAAGGCT  
GGGGCTCAACCCGAACTGCCTTAATACTGTTGAAGTGTAGAGAGTGTGGGCTAGCGGAATGTATGGTGTAGCGGTG  
AAATGCTTAGAGATACAGAAACACCAGTGGCGAAGGCGGCTTACCAAACTATATCTGACGTTGAGGCACGAAAGCGTG  
GGGAG

>ASV:3467:Genus:Alistipes

TACGGAGGATTCAAGCGTTATCCGGATTTATTGGGTTAAAGGGTGCCTAGGCGGTTTGATAAGTTAGAGGTGAAATCCC  
GGGGCTTAACCTCCGGAATGCTCTAATACTGTTAGACTAGAGAGTGTGGGCTAGCGGAATGTATGGTGTAGCGGTG  
GAATGCGTAGATATCGGGAGGAACACCAGTGGCGAAGGCGGCTACTGGGCACCAACTGACGCTGAGGCTCGAAAGCATG  
GGTAG

>ASV:3468:Genus:Lachnospiraceae\_UCG-004

TACGTAGGGGGCAAGCGTTATCCGGATTTACTGGGTGTAAGGGGAGCTAGACGGCGGCGCAAGTCTGAAGTAAAATACC  
CGGGCTCAACCTGGGAACTGCTTTGAAACTGTGTTGCTGGAGTGTGGAGAGGTAAGCAGGAAATTCCTAGTGTAGCGGTG  
AAATGCGTAGATATTAGGAAGAACACCAGTGGCGAAGGCGGCTACTGGACAGTAAGTACGCTTGGAGCTCGAAAGCGTG  
GGGAG

>ASV:3469:Genus:Alistipes

TACGGAGGATTCAAGCGTTATCCGGATTTATTGGGTTAAAGGGTGCCTAGGCGGTTTGATAAGTTAGAGGTGAAATTTCC  
GGGGCTCAACCCGAACTGCCTTAATACTGTTGAGCTAGAGAGTGTGGGCTAGCGGAATGTATGGTGTAGCGGTG  
AAATGCTTAGATATCGGGAGGAACACCAGTGGCGAAGGCGGCTACTGGGCACCAACTGACGCTGAGGCTCGAAAGCGTG  
GGTAG

>ASV:3470:Genus:GCA-900066575

TACGTAGGGGGCAAGCGTTATCCGGATTTACTGGGTGTAAGGGGAGCTAGGCGGCTGACAAGTCAAGTAAAAGCCC



GGGGCTCAACCCGGGACTGCTTTTAAAAGTCCGGACTAGATTGCAGGAGAGGTAAGTGAATTCCTAGTGTAGCGGTG  
AAATGCGTAGATATTAGGAGGAACACCAGTGGCGAAGGCGGCTTACTGGACTGTAATGACGCTGAGGCTCGAAAGCGTG  
GGGAG

>ASV:3471:Family:Lachnospiraceae

TACGTAGGGGGCAAGCGTTATCCGGATTTACTGGGTGTAAGGGGAGCGCAGACGGCACTGCAAGTCTGAAGTGAAGCCC  
GGGGCTCAACCCGGGACTGCTTTTAAAAGTGTCAAAGTACAGGAGAGGAAAGCGGAATTCCTAGTGTAGCGGTG  
AAATGCTTAGATATCACGAAGAACCCTCGATTGCGAAGGCAGCTTACTGGACTGTAATGACGCTGATGCTCGAAAGTGTG  
GGTAT

>ASV:3472:Family:Ruminococcaceae

TACGTAGGGAGCGAGCGTTGTCCGGAATTACTGGGTGTAAGGGTGCCTAGGCGGGCAGTCAAGTCAAGCTGAAATCTA  
TGGGCTTAACCCATAGCTGCTTTTAAAAGTGAATGTCTTGAAGTGAAGTGAAGGTAAGCGGAATTCCTAGTGTAGCGGTG  
AAATGCGTAGAGATCGGGAGGAACACCAGTGGCGAAGGCGGCTTACTGGGCTTTACTGACGCTGAGGCACGAAAGCATG  
GGTAG

>ASV:3473:Species:buccae/denticola

TACGGAAGGTCCGGGCTTATCCGGATTTATTGGGTTTAAAGGGAGCGCAGGCGCCGTGCAAGCGTGCCGTGAAAAGCA  
GCGGGCCAACCGCTGCGCTGCGGCGCAACTGCTTGGCTTGAAGTGCAGCGGAAAGCGGGCGGAATTCGTGGTGTAGCGGTG  
AAATGCTTAGATATCACGAAGAACCCTCGATTGCGAAGGCAGCCGCTGTGGCGCCACTGACGCTGAGGCTCGAAAGTGTG  
GGTAT

>ASV:3474:Family:Ruminococcaceae

TACGTAGGTGGCAAGCGTTATCCGGAATTATTGGGTGTAAGGGTGCCTAGGCGGGATGTAAGTCAAGTGTGAAATACG  
TGGGCTCAACCCACGAACTGCATTTGAAACTTACGTTCTTGAAGTCAAGTGAAGGCAAGCGGAATTCCTAGTGTAGCGGTG  
AAATGCGTAGATATTGGGAGGGACACCAGTGGCGAAGGCGGCTTGTGGGCTTGAAGTCAAGTCAAGTGTGAGGCACGAAAGTGTG  
GGGAG

>ASV:3475:Order:Bacteroidales

TACGTATGGTGCAGCGTTATCCGGATCTATTGGGTTTAAAGGGAGCGCAGACGGGAGATTAAGTCAAGTGTGAAAAGTTT  
GCGGCTCAACCCGTAATTTGCAAGTGTACTGGTTTCTTGAAGTGCAGTGTAGGCGAGCGGAATGCGTGGTGTAGCGGTG  
AAATGCGTAGATATCACGAGAACCCTCGATTGCGAAGGCAGCTTACCAAATATATCTGACGTTGAGGCACGAAAGCGTG  
GGGAG

>ASV:3476:Genus:GCA-900066755

TACGGAGGATCCGAGCGTTATCCGGATTTATTGGGTTTAAAGGGAGCGTAGACGGAGCAGCAAGTCTGATGTGAAAACCC  
GGGGCTCAACCCGGGACTGCATTGAAAAGTGTGATCTGGAGTGCAGGAGAGGTAAGCGGAATTCCTAGTGTAGCGGTG  
AAATGCTTAGATATCACGAAGAACCCTCGATTGCGAAGGCAGCTGCTAAGCTGCAACTGACATTGAGGCTCGAAAGTGTG  
GGTAT

>ASV:3477:Family:Ruminococcaceae

AACGTAGGGTGCAGCGTTGTCCGGAATTACTGGGTGTAAGGGAGCGCAGGCGGACCGGCAAGTTGGAAGTGAAACTA  
TGGACTCAACCCATAAATTGCTTTCAAAGTGTGCTGGCCTTGAAGTGTGAGGAGGTAAGCGGAATTCGTGGTGTAGCGGTG  
AAATGCTTAGATATCACGAAGAACCCTCGATTGCGAAGGCAGCTCACTGGACTGCAACTGACACTGATGCTCGAAAGTGTG  
GGTAT

>ASV:3478:Genus:Ruminococcaceae\_UCG-010

TACGTAGGTGGCAAGCGTTATCCGGATTTACTGGGTGTAAGGGTGTGTAGGCGGGGAAACAAGTCAAGTGTGAAATGCC  
AAGGCTAAACCATGGAGCTGCATTTGAAAGTGTGTTTCTTGAAGTGGGAGAGGTAAGCGGAATTCCTAGTGTAGCGGTG  
AAATGCGTAGATATCGGGAGGGACACCAGTGGCGAAGGCGGCTTACTGGACCTTACTGACGCTGAGACACGAAAGTGTG  
GGTAT

>ASV:3479:Genus:Intestinimonas

TACGTAGGTGGCAAGCGTTATCCGGATTTACTGGGTGTAAGGGCGTGTAGGCGGGACTGCAAGTCAAGTGTGAAAATTA  
TGGGCTCAACCCATAACCTGCATTTGAAAGTGTGTTTCTTGAAGTGGGAGAGGTAAGCGGAATTCCTAGTGTAGCGGTG  
AAATGCGTAGATATCACGAAGAACCCTCGATTGCGAAGGCAGCTGCTGGACAATAACTGACGCTGAGGCGCGAAAGCGTG  
GGGAG

>ASV:3480:Genus:Desulfovibrio

TACGGAGGGTGCAGCGTTAATCCGGAATCACTGGGCGTAAAGCGCACGTAGGCTGTTATGTAAGTCAAGGGTGAATCCC  
ACGGCTCAACCGTGAAGTGCCTTGTACTGCACGACTTGAATCCGGGAGAGGGTGGCGGAATTCAGGTGTAGGAGTG  
AAATCCGTAGATATCTGGAGGAACATCAGTGGCGAAGGCGGCGCACCTGGACCGGTATTGACGCTGAGGCTCGAAAGCGTG  
GGGAG

>ASV:3481:Order:Mollicutes\_RF39

TACGTAGGGGGCGAGCGTTATCCGGATTTATTGGGCGTAAAGCGTGTGTAGGCGGTTTATTAAGTCTAAGATCAAAGCCC  
GAGGCTTAACCTCGTTCTGTAGAAACTGGTAGACTTGAAGTGTGGTAGAGGCAAGTGAATTCCTAGTGTAGCGGTG  
AAATGCTTAGATATTAGAAGGAACACCAGTGGCGAAGGCGGCTTGTGGGCCATTACTGACGCTGAGACACGAAAGCGTGG  
GGAGC

>ASV:3482:Family:Lachnospiraceae

TACGTAGGTGGCGAGCGTTATCCGGATTTACTGGGTGTAAGGGAGTGTAGGTGGCCATGCAAGTCAAGTGAAGTGAATCC  
GGGGCTCAACCCGGAAGTGCATTTTAAAAGTGAAGGCTGGAGTGCAGGAGGGGTGAGTGAATTCCTAGTGTAGCGGTG  
AAATGCTTAGATATCACGAAGAACCCTCGATTGCGAAGGCAGCTGCCAGACCGCAACTGACGTTTATGCTCGAAAGTGTG  
GGTAT

>ASV:3483:Kingdom:Bacteria

TACGTATGGTGAAGCGTTATCCGGATTTACTGGGTGTAAGGGTGCCTAGGCGGCTGATAAGTGTGAAATACCC  
CGGGCTTAACCTGGGGGTGCATCCAATACTGTTGGACTAGAGTACAGGAGAGGAAAGCGGAATTCCTAGTGTAGCGGTG  
AAATGCGTAGATATTAGGAGGAACACCAGTGGCGAAGGCAGCTCACTGGAGCGCAACTGACGCTGAAGTGTGAAAGTGTG  
GGTAT

>ASV:3484:Class:Bacteroidia  
TACGGAGGATCCAAGCGTTATCCGGATTTATTGGGTTAAAGGGTGCCTAGGCGGTTTAGTAAGTCAGCGGTGAAATTTT  
GGTGCCTAACACCAACGCTGCTGTTGATACTGCTGGGCTAGAGAGTAGTTGCGGTAGCGGAATGTATGGTGTAGCGGTG  
AAATGCTTAGATATCACGAAGAAGCTCCGATTGCGAAGGCAGCTCACTAGACTGCAACTGACACTGATGCTCGAAAGTGTG  
GGTAT

>ASV:3485:Genus:Shuttleworthia  
TACGTAGGGGGCAAGCGTTATCCGGATTTACTGGGTGTAAAGGGAGCGTAGGCGGTCTATAAGTCTGATGTGAAAGCCC  
GGGGCTCAACCCCGGACTGCATTGGAACTGCCGCTTGGAGTGTGCGGAGGGTAAGTGAATTCCCTAGTGTAGCGGTG  
AAATGCGTAGATATCGGAGGAACACCCAGTGGCGAAGGCGGCTACTGGGCACTAACTGACGCTGAGGCTCGAAAGCATG  
GGTAG

>ASV:3486:Family:Lachnospiraceae  
TACGGAGGATGCGAGCGTTATCCGGATTTACTGGGTGTAAAGGGAGCGTAGACGGATGGACAAGTCTGATGTGAAAGGCT  
GGGGCTCAACCCCGGACTGCATTGGAACTGCCGCTTGGAGTGTGCGGAGGGTAAGCGGAATTCCTAGTGTAGCGGTG  
AAATGCTTAGATATCACGAAGAAGCTCCGATTGCGAAGGCAGCTTACTAACTGTAAGTACGCTTCTGCTCGAAAGTGTG  
GGTAT

>ASV:3487:Genus:Chryseobacterium  
TACGGAGGATGCAAGCGTTATCCGGATTTATTGGGTTAAAGGGTCCGAGGCGGACCGATAAGTCAGTGGTGAATCTC  
ATAGCTTAACCTGAACTGCCGTTGATACTGTCGGTCTTGGAGTAAATTAGAGGTAGCTGGAATAAGTGTAGCGGTG  
AAATGCATAGATATTACTTAGAACACCAATTGCGAAGGCAGTTACCATAATTTAACTGACGCTGAGGGACGAAAGCGTG  
GGGAG

>ASV:3488:Order:Lactobacillales  
TACGTAGGGAGCAAGCGTTTCCGGATTTATTGGGCGTAAAGCGAGCGAGGCGGTTTGATAAGTCTGAAGTTAAAGGCT  
GTGGCTCAACCATAGTTTCGCTTTGGAACTGTCAAACCTTGGAGTGTGCGAAGGGGAGAGTGAATTCCATGTAGCGGTG  
AATGCGTAGATATCACGAGAAGCTCCGATTGCGAAGGCAGCTTACTAACTGTAAGTACGCTGAGGGACGAAAGCGTG  
GGATC

>ASV:3489:Family:Lachnospiraceae  
TACGTATGGTGAAGCGTTATCCGGATTTACTGGGTGTAAAGGGAGCGAGGCGGTGCGGCAAGTCTGATGTGAAAGCCC  
GGGGCTCAACCCCGGACTGCATTGGAACTGTGCTAGAGTGTGCGGAGGGTAAGCGGAATTCCTAGTGTAGCGGTG  
AAATGCATAGATATCACGAAGAAGCTCCGATTGCGAAGGCAGCTCACTGGAGTGAAGTACGCTGAGCGGATGCTCGAAAGTGTG  
GGTAT

>ASV:3490:Genus:Acidaminococcus  
TACGTAGGGAGCAAGCGTTTCCGGATTTATTGGGCGTAAAGAGCATGTAGGCGGGCTTTTAAAGTCCGACGTGAAAATGC  
GGGGCTTAACCCCGTATGGCGTTGGATACTGGAAAGTCTTGGAGTGTGCGAAGGGGAAAGGGGAATTCCTAGTGTAGCGGTG  
AATGCGTAGAGATTAGGAAGAACACCCGTTGGCGAAGGCAGCTTCTGAGCAAACTGACGCTGAGGCGCGAAAGCGTG  
GGAGC

>ASV:3491:Order:Bacteroidales  
TACGGAGGATCCGAGCGTTATCCGGATTTATTGGGTTAAAGGGAGCGTAGGCGGACTATTAAGTCAGCGGTCAAATGCC  
ACGGCTCAACCCGTTGGCCAGCCGTTGAACTGTAAAGCTTGGAGTGTGACAGGGCACGTGGAATTCCTAGTGTAGCGGTG  
AATGCGTAGATATTAGGAGAACACCCAGTGGCGAAGGCGGCTGCTGAGCAGCAACTGACGCTGAGGCGCGAAAGCGTG  
GGAGC

>ASV:3492:Species:lenta  
TACGTAGGGAGCGAGCGTTATCCGGAATCATTGGGCGTAAAGAGCGGTAGGCGGCCTCTCAAGCGGGATCTCTAATCCG  
AGGGCTCAACCCCGGCGGATCCCGAACTGGGAGGCTCGAGTTGCGTAGAGGCAGGCGGAATTCCTAGTGTAGCGGTG  
AATGCGCAGATATCGGGAAGAACACCCGATGGCGAAGGCAGCTGCTGGCCGCAACTGACGCTGAGGCGCGAAAGCTAGG  
GGAGC

>ASV:3493:Genus:Intestinimonas  
TACGTAGGTGGCAAGCGTTATCCGGATTTACTGGGTGTAAAGGGCGTGTAGGCGGAAAGCAAGTCAAGCGGTGAAAAGT  
GAGGCTCAACCTCCAGCCTGCGTTTGGAACTGTTTTCTTGGAGTGTGCGGAGAGGCAATCGGAATTCCTAGTGTAGCGGTG  
AAATGCGTAGATATACGGAGAACACCCAGTGGCGAAGGCGGATTGCTGGACGATAACTGACGCTGAGGCGCGAAAGCGTG  
GGGAG

>ASV:3494:Genus:Sutterella  
TACGTAGGGTGAAGCGTTAATCGGAATTTACTGGGCGTAAAGCGTGCAGGCGGCTCTGTAAGATAGATGTGAAATCCC  
CGGGCTCAACCTGGGAATTGCATATATGACTGCAGGACTTGGAGTTGTCAGAGGAGGGTGAATTCACGCTGTAGCAGTG  
AAATGCGTAGATATGTGGAAGAACACCCGATGGCGAAGGCAGCCCTCTGGGACATGACTGACGCTCATGCACGAAAGCGTG  
GGGAG

>ASV:3495:Family:Family\_XIII  
TACGTAGGGGGCAAGCGTTATCCGGATTTATTGGGCGTAAAGAGTACGTAGGCGGTTCTTTAAGCGAGGGTATAAGGCA  
ATGGCTTAACCTGTTTCCCTGTGAACTGGGGACTTGGAGTATCGGAGAGGAAAGCGGAATTCCTAGTGTAGCGGTG  
AATGCGTAGATATTAGGAGAACACCCAGTGGCGAAGGCGGCTTCTGAGCAAACTGACGCTGAGGTACGAAAGCGTG  
GGAGC

>ASV:3496:Species:haifense  
TACGGAGGATGCAAGCGTTATCCGGATTTATTGGGTTAAAGGGTCCGTAAGTCAAGTCAAGTGTGAAATCTC  
ATAGCTTAACCTGAACTGCCATTGATACTGCAGGCTTGGAGTAAATTTGAGTGGCTGGAATAAGTGTAGCGGTG  
AAATGCATAGATATTACTTAGAACACCAATTGCGAAGGCAGTCACTAAGATTTAACTGACGCTGATGGACGAAAGCGTG  
GGTAG

>ASV:3497:Species:carotinifaciens/gahaiensis/haeundaensis/marcusii  
TACGGAGGGGCTAGCGTTGTTCCGGAATTTACTGGGCGTAAAGCGCACGTAGGCGGACTGGAAGTCAAGGTTGAAATCCC  
AGGGCTCAACCTTGGAACTGCCTTTGGAACTATCAGTCTGGAGTTCGAGAGAGGTGAGTGAATTCAGTGTAGAGGTG

AAATTCGTAGATATTCGGAGGAACACCAGTGGCGAAGGCGGCTCACTGGCTCGATACTGACGCTGAGGTGCGAAAGCGTG  
GGAG  
>ASV:3498:Genus:Bacteroides  
TACGGAGGATCCGAGCGTTATCCGGATTTATTGGGTTTAAAGGGAGCGTAGATGGATGTTTAAAGTCAGTTGTGAAAGTTT  
GCGGCTCAACCGTAAAATTGCAGTTGATACTGGATGTCTTGAGTGCAGTTGAGGCAGGCGGAATTCGTGGTGTAGCGGTG  
AAATGCGTAGATATTAGGAGGAACACCAGTGGCGAAGGCGCCTTTCTGGACTGTGTCTGACGCTGAGATGCGAAAGCCAG  
GGTAG  
>ASV:3499:Family:Family\_XIII  
TACGTAGGGGGCGAGCGTTATCCGGAATTATTGGGCTAAAGAGTGCGTAGGTGTTACCTAAGCGCAGGGTCTAAGGCA  
ATGGCTCAACCATTGTTCCGCTCGCAACTGGGCTACTTGAGTGCAGGAGAGGAAAGCGGAGTTCCTAGTGTAGCGGTGA  
AATGCTTAGATATCACGAAGAACTCCGATTGCGAAGGCAGCCTGCTAAGCTGCAACTGACATTGAGGCTCGAAAGTGTG  
GTATC  
>ASV:3500:Order:Clostridiales  
TACGTATGGAGCAAGCGTTATCCGGATTTACTGGGTGTAAGGGAGCGTAGATGGATGTTTAAAGTCAGTTGTGAAAGTTT  
GCGGCTCAACCGTAAAATTGCAGTTGATACTGGGTGTCTTGAGTACAGTAGAGGCAAGCGGAATTCAGTGTAGCGGTG  
AAATGCGTAGATATTCGGAGGAACACCAGTGGCGAAGGCGGCTTCTGGGCTTAACTGACGCTGAGGCTCGAAAGTGTG  
GGGAG  
>ASV:3501:Genus:Ruminococcaceae\_UCG-010  
TACGTAGGTGGCGAGCGTTATCCGGATTTACTGGGTGTAAGGGTGTGTAGGCGGGATTGCAAGTCAGATGTGAAAAGT  
TGGGCTCAACCCACAGCCTGCATTTGAAACTGTGATTCTTGAGTGTGGGAGAGGTAAGCGGAATTCCTAGTGTAGCGGTG  
AAATGCGTAGATATTCGGAGGAACACCAGTGGCGAAGGCGGCTTACTGGACCAACTGACGCTGAGACACGAAAGTGTG  
GGGAG  
>ASV:3502:Order:Bacteroidales  
TACGGAGGATCCGAGCGTTATCCGGGTTTATTGGGTTTAAAGGGAACGTAGATGGGTTGTTAAGTCAGTTGTGAAAGTTT  
GCGGCTCAACCGTAAAATTGCATTTGATACTGGCGTCTTGAGTATAGTTGAGGTGGGCGGAATTCGTGGTGTAGCGGTG  
AAATGCGTAGATATTAGGAGGAACACCAGTGGCGAAGGCGGCTTCTGGACGACAACCTGACGCTGAGGCGCGAAAGCGTG  
GGGAG  
>ASV:3503:Genus:Ruminococcaceae\_UCG-013  
TACGGAGGATCAAGCGTTATCCGGATTTACTGGGTGTAAGGGCGCGTAGGCGGACTGTCAAGTTAGTCGTGAAATACC  
GGGGTAAACCCCGGGGCTGCGATTGAAACTGACAGCCTTGAGTATCGGAGAGGAAAGCGGAATTCCTAGTGTAGCGGTG  
AAATGCGTAGATATTAGGAGGAACACCAGTGGCGAAGGCGGCTTACTGGACGTAACCTGACGCTGAGGCTCGAAAGCGTG  
GGGAG  
>ASV:3504:Genus:Desulfovibrio  
TACGGAGGGTCAAGCGTTAATCCGGAATTACTGGGCGTAAAGCGCACGTAGGCTGTAGTGTAAAGTCAGGGGTGAAATCCC  
ACGGCTCAACCGTGGAACTGCCTTTGATACTACACAACCTGAATCCGGGAGAGGGTGGCGGAATTCAGGTGTAGGGGTG  
AAATCCGTAGATATTAGGAAGAACACCAGTGGCGAAGGCGGCTGCCGGGCTTAACTGACGCTGAGGCACGAAAGCGTG  
GGTAG  
>ASV:3505:Genus:GCA-900066575  
TACGTAGGGGGCAAGCGTTATCCGGATTTACTGGGTGTAAGGGAGCGTAGGCGGCGATGCAAGTCAGAAGTAAAAGCTC  
AGGGCTTAAACCGTGGGACTGCTTTTGAAGTGTGTTGCTGGATTGCCGGAGAGGTAAGTGGAAATTCCTAGTGTAGCGGTG  
AAATGCGTAGATATTAGGAGGAACACCAGTGGCGAAGGCGGCTTACTGGACGGTGAATGACGCTGAGGCTCGAAAGCGTG  
GGGAG  
>ASV:3506:Order:Clostridiales  
TACGTAGGGGGCAAGCGTTATCCGGATTTACTGGGTGTAAGGGCGTGCAGCCGGGAATGCAAGTCAGATGTGAAATCCA  
TGGGCTTAAACCATGAACTGCATTTGAAACTGTATTTCTTGAGTACTGGAGAGGCAATCGGAATTCCTAGTGTAGCGGTG  
AAATGCTTAGATATCACGAAGAACTCCGATTGCGAAGGCAGCTTACTGGATTGTAACCTGACGCTGATGCTCGAAAGTGTG  
GGTAT  
>ASV:3507:Order:Lactobacillales  
TACGTAGGGGGCAAGCGTTATCCGGATTTACTGGGTGTAAGGGAGCGTAGACGGTGTGGCAAGTCTGATGTGAAAGGCA  
GTGGCTCAACCATTTGAGGCTTTGAAACTGTTAACTTGAGTGCAGAAAGGGAGAGTGGAAATTCATGTGTAGCGGTGA  
AATGCGTAGATATTAGGAGGAACACCAGTGGCGAAGGCGACCTACTGGGCACCAACTGACGCTGAGGCTCGAAAGTGTG  
GTAGC  
>ASV:3508:Class:Bacteroidia  
TACGTAGGTGGCAAGCGTTATCCGGATTTATTGGGTTTAAAGGGTGCGTAGGCGGTTTAGTAAGTCAGCGGTGAAATTTT  
GGTGCTTAAACCAAACGTGCCGTTGATACTGCTGGCTAGAGAGTAGTTGCCGGTAGGCGGAATGTATGGTGTAGCGGTG  
AAATGCGTAGATATTAGGAGGAACACCAGTGGCGAAGGCGGATTGCTGGACGATAACTGACGCTGAGGCGCGAAAGTGTG  
GGGAG  
>ASV:3509:Genus:Blautia  
TACGTAGGGGGCAAGCGTTATCCGGATTTACTGGGTGTAAGGGAGCGTAGACGGACTGGCAAGTCTGATGTGAAAGGCG  
GGGGCTCAACCCCTGGACTGCATTGAAACTGTTAGTCTTGAGTGCCGGAGAGGTAAGCGGAATTCCTAGTGTAGCGGTG  
AAATGCGTAGATATTAGGAGGAACACCAGTGGCGAAGGCGGATTGCTGGACGATAACTGACGCTGAGGCGCGAAAGTGTG  
GGGAG  
>ASV:3510:Family:Lachnospiraceae  
TACGTATGGTCAAGCGTTATCCGGATTTACTGGGTGTAAGGGAGCGTAGACGGAGTGGCAAGTCTGATGTGAAAACCC  
GGGGCTCAACCCCGGACTGCATTGAAACTGTAATCTAGAGTACCGGAGAGGTAAGCGGAATTCCTAGTGCAGCGGTG  
AAATGCGTAGATATTACGAAGAACTCCGATTGCGAAGGCAGCTCACTAGACTGTCACTGACACTGATGCTCGAAAGTGTG  
GGTAT  
>ASV:3511:Genus:Sphingomonas

TACGAGGGGAGCTAGCGTTGTTTCGGAATTACTGGGCGTAAAGCGCACGTAGGCGGCTTTGTAAGTAAGGGGTGAAAAGTCC  
AGAGCTCAACTCTGGAATTGCCTTTTACTGACTGCATCGCTTGAATCCAGGAGAGGTGAGTGGAATCCGAGTGTAGAGGTG  
AAATTCGTAGATATTCGGAAGAACCACAGTGGCGAAGGCGGCTCACTGGACTGGTATTGACGCTGAGGTGCGAAAGCGTG  
GGGAG

>ASV:3512:Family:Lachnospiraceae

TACGTAGGGGGCAAGCGTTATCCGGATTTACTGGGTGTAAGGGAGCGTAGACGGTGTGGCAAGTCTGATGTGAAAGGCA  
TGGGCTCAACCTGTGGACTGCATTGGAACCTGGTCAACTTGAAGTGCAGAAGAGGGAAGTGAATCCATGTGTAGCGGTG  
AAATGCGTAGATATGGAAGAACCACCGTGGCGAAGGCGGCTCTGGTCTGGATTCTGACACTGAAGCACGAAAGCGT  
GGGGA

>ASV:3513:Family:Ruminococcaceae

AACGTAGGTCAACAGCGTTGTCCGGAATTACTGGGTGTAAGGGAGCGCAGGCGGGAAGACAAGTTGGAAGTAAAATCTA  
TGGGCTCAACCCATAAACTGCTTTCAAACCTGTTTTCTTGAAGTGTGACAGAGGTAGGCGGAATCCATGTGTAGCGGTG  
AAATGCGTAGATATATGGAAGAACCACAGTGGCGAAGGCGGCTCTGGTCTGGATTCTGACACTGAAGCACGAAAGCGT  
GGGGA

>ASV:3514:Genus:Sellimonas

TACGTAGGGGGCAAGCGTTATCCGGATTTACTGGGTGTAAGGGAGCGTAGACGGCATTGCAAGTCTGGAGTAAAACCC  
GGGGCTCAACCCGGGATTGCTTTGGAACCTGCAGTTCTAGAGTGCAGAGGTAGGCGGAATCCATGTGTAGCGGTG  
AAATGCGTAGATATTAGGAAGAACCACAGTGGCGAAGGCGGCTTACTGGACGGTAACGACGTTGAGGCTCGAAAGCGTG  
GGGAG

>ASV:3515:Order:Bacteroidales

TACGGAGGATGCGAGCGTTATCCGGATTTATTGGGTTAAAGGGAGCGCAGGCGGGCGATCAAGTTGGAAGTAAAATCCA  
TGGGCTCAACCCATGAAGTGCCTTTCAAACCTGATTGTCTTGAAGTGTGACAGAGGTAGGCGGAATCCCGGTGTAGCGGTG  
AAATGCTTAGATATCAGGAAGAACCACGATTGCGAAGGCGAGCTGCTAAGCTGCAACTGACATTGAGGCTCGAAAGTGTG  
GGTAT

>ASV:3516:Genus:Adlercreutzia

TACGTAGGGAGCGAGCGTTATCCGGATTCATTGGGCGTAAAGCGCGGTAGGCGGCCCTAAGCGGAACCTCTAATCCC  
GGGGCTCAACCTCGGGCCGGTTCCGGAAGTGGGCGGCTGAGTGCAGGTAGAGGTAGGCGGAATCCCGGTGTAGCGGTG  
AAATGCGTAGATATCGGGAGGAACACCAGTGGCGAAGGCGGCTACTGGGCACCAACTGACGCTGAGGCTCGAAAGTGTG  
GTAGC

>ASV:3517:Family:Bifidobacteriaceae

TACGTAGGATGCAAGCGTTGTCCGGATTTATTGGGCGTAAAGCGAGCGCAGGCGGTTTGATAAGTCTGAAGTTAAAGGT  
GTGGCTCAACCATAGTTCGCTTTGGAACCTGTTAACTTGAAGTGCAGGTAGGGGAGACTGGAATCCCGGTGTAAAGCGT  
AAATGCTTAGATATCGGGAGGAACACCAATGGCGAAGGCGAGGTTCTTGGCCCGTCACTGACGCTGAGGCTCGAAAGCGTG  
GGAGC

>ASV:3518:Genus:Actinomyces

TACGTAGGTGGCGAGCGTTATCCGGAATGATTGGGCGTAAAGGGCTTGTAGGCGGTTTGTCCGCTGTCGCTGAAATCCT  
CTGGCTTAACCTCGGGCGTGCAGTGGGTACGGGCGAGCTTGAAGTGCAGGTAGGGGAGACTGGAATCCCGGTGTAGCGGTG  
GAATGCGCAGATATCAGGAAGAACCACCGTGGCGAAGGCGGCTCTTGGCCGTTACTGACGCTGAGGAGCGAAAGCGTG  
GGGAG

>ASV:3519:Genus:Ruminococcaceae\_UCG-005

TACGTAGGTGGCAAGCGTTGTCCGGATTTACTGGGTGTAAGGGCGTGTAGGCGGGAAGACAGGTGAGTGTGAAATGT  
GGGGCTCAACCTGGAAGTGCATTTGAAACCTTTTTCTTGAAGTATCGGAGAGGCGAGGCGGAATCCATGTGTAGCGGTG  
AAATGCGTAGATATTAGGAGGAACACCAGTGGCGAAGGCGGCTCTTGGACGAACTGACGCTGAGGCGCGAAAGCGTG  
GGGAG

>ASV:3520:Family:Ruminococcaceae

TACGTAGGGAGCAAGCGTTGTCCGGATTTACTGGGTGTAAGGGTGCAGTGGGCTTTGCAAGTCAAGTGTGAAATCTA  
TGGGCTCAACCCATAAACTGCATTTGAAACCTGTAGAGCTTGAAGTGCAGGAGGCGAGGCGGAATCCCGGTGTAGCGGTG  
AAATGCGTAGATATTAGGAGGAACACCAGTGGCGAAGGCGGATTGCTGGACGAACTGACGCTGAGGCGCGAAAGCGTG  
GGGAG

>ASV:3521:Family:Lachnospiraceae

TACGTAGGGGGCAAGCGTTATCCGGAATTACTGGGTGTAAGGGTGCAGTGGTATGGCAAGCCAGAAGTAAAACCC  
AGGGCTTAACCTCGGGACTGCTTTTGAACCTGTGAGTGGAGTGCAGGAGAGGTAAGCGGAATCCATGTGTAGCGGTG  
AAATGCGTAGAGATTAGGAAGAACCACCGTGGCGAAGGCGACTTTCTGGACGAAACTGACGCTGAGGCGCGAAAGCGTG  
GGGAG

>ASV:3522:Genus:Actinotalea

TACGTAGGGCGCAAGCGTTGTCCGGAATTATTGGGCGTAAAGAGCTCGTAGGCGGTTTGTCCGCTGTCGCTGAAAACCC  
GAGGCTCAACCTCGGGCGTGCAGTGGGTACGGGCGAGCTAGAGTGCAGGTAGGGGAGACTGGAATCCCGGTGTAGCGGTG  
GAATGCGCAGATATCAGGAGGAACACCAGTGGCGAAGGCGAGTCTTGGCCGCAACTGACGCTGAGGAGCGAAAGCATG  
GGGAG

>ASV:3523:Species:asuensis/lutea/luteola/zeshuii

TACAGAGGGTGCAGCGTTAATCGGAATTACTGGGCGTAAAGCGCGGTAGGTGGCTTGGTAAGTTGAATGTGAAATCCC  
CGGGCTCAACCTGGGAACTGCATCCAAAACCTGCTGGCTAGAGTACGGTAGAGGGTGGTGAATTTCTGTGTAGCGGTG  
AAATGCGTAGATATTAGGAAGAACCACAGTGGCGAAGGCGACCACTGGACTGATACTGACACTGAGGTGCGAAAGCGTG  
GGGAG

>ASV:3524:Genus:Erysipelatoclostridium

TACGGAGGATCCGAGCGTTATCCGGAATTATTGGGCGTAAAGAGGGAGCAGGCGGCGAGCAAGGGTCTGTGGTAAAAGCT  
GAAGCTTAACCTCAGTAAGCCATAGAAACCAGGCGAGTGTGAGTGCAGGAGAGGATCGTGAATCCATGTGTAGCGGTG  
AAATGCGTAGATATCAGAGGAACACTCGTGGCGAAGGCGGGTCTTGGACATTAACCTGACGCTGAGGCGCAAGGCGCAG

GGAGC

>ASV:3525:Genus:Alistipes

TACTTCTTCTCCCTCTTCTCTTTTTCTTTTTTTAAAGGGTGCCTAGGCGGTTTGATAAGTTAGAGGTGAAATCCC  
GGGGCTTAACCTCCGGAAGTGCCTTAATACTGTTAGACTAGAGAGTAGTTGCGGTAGCGGAATGTATGGTGTAGCGGTG  
AAATGCTTAGAGATCATAACAGAACCCGATTGCGAAGGCAGCTTACCAAATATATCTGACGTTGAGGCACGAAAGCGTG  
GGGAG

>ASV:3526:Genus:Ruminococcaceae\_UCG-014

TACGTAGGGAGCAAGCGTTATCCGGATTTATTGGGTGTAAGGGTGCCTAGACGGGAAGCAAGTTAGTTGTGAAATCCC  
TCGGCTTAACCTGAGGAAGTGCCTTAATACTGTTAGACTAGAGAGTAGTTGCGGTAGCGGAATGTATGGTGTAGCGGTG  
AAATGCTTAGATATCACGAAGAAGTCCGATTGCGAAGGCAGCTGCTAAGCTGCAACTGACATTGAGGCTCGAAAGTGTG  
GGTAT

>ASV:3527:Genus:Ruminococcaceae\_UCG-014

TACGTAGGGAGCAAGCGTTATCCGGATTTATTGGGTGTAAGGGTGCCTAGACGGGAAGCAAGTTAGTTGTGAAATCCC  
TCGGCTTAACCTGAGGAAGTGCCTTAATACTGTTAGACTAGAGAGTAGTTGCGGTAGCGGAATGTATGGTGTAGCGGTG  
AAATGCTTAGATATCACGAAGAAGTCCGATTGCGAAGGCAGCTGCTAAGCTGCAACTGACATTGAGGCTCGAAAGTGTG  
GGGAG

>ASV:3528:Family:Lachnospiraceae

TACGGAGGATCCGAGCGTTATCCGGATTTACTGGGTGTAAGGGAGCGTAGACGGCAGCAAGTCTGAAGTGAATACC  
CGGGCTCAACCTGGGAAGTGCCTTGGAAAGTGTGTTGCTAGAGTGTGGAGAGGTAAGTGAATTCCTAGTGTAGCGGTG  
AAATGCTTAGATATCACGAAGAAGTCCGATCGCAAGGCATTGTGCCGGGCAGCACGACGCTGAGGCTCGAAAGTGTG  
GGTAT

>ASV:3529:Family:Ruminococcaceae

TACGTAGGTGGCGAGCGTTATCCGGATTTACTGGGTGTAAGGGTGCCTAGGCGGCTTTGCAAGTCAAGTGTGAAATCTA  
TGGGCTCAACCCATAAACTGCATTTGAAACTGTAGAGCTTGAAGTGAAGTGAAGGCAGCGGAATTCCTAGTGTAGCGGTG  
AAATGCTTAGATATCACGAAGAAGTCCGATTGCGAAGGCAGCTGCTGGACGACAAGTGAAGTGTGAGGCTCGAAAGCGTG  
GGGAG

>ASV:3530:Genus:Ruminiclostridium\_9

TACGTAGGTGGCAAGCGTTATCCGGATTTACTGGGTGTAAGGGTGCCTAGGCGGACTGCAAGTCAAGTGTGAAAACCA  
CGGGCTCAACCTGTGGCTGCATTTGAAACTGTAGTCTTGAAGTGAAGTGAAGGCAGCGGAATTCCTAGTGTAGCGGTG  
AAATGCTTAGATATCACGAAGAAGTCCGATTGCGAAGGCAGCTGCTGGACGACAAGTGAAGTGTGAGGCTCGAAAGCGTG  
GGGAG

>ASV:3531:Family:Lachnospiraceae

TACGTATGGTGCAAGCGTTATCCGGATTTACTGGGTGTAAGGGAGCGCAGGCGGTACGGCAAGTCTGATGTGAAAGGCA  
TGGGCTCAACCTGTGGACTGCATTGGAAGTGTGCTACTAGAGTGTGGAGGGGTAAGCGGAATTCCTAGTGTAGCGGTG  
AAATGCATAGATATCACGAGAACCCGATTGCGAAGGCAGCTGCTAGGGTGCACAGACGCTGAGGCACGAAAGCGTG  
GGTAT

>ASV:3532:Kingdom:Bacteria

TACGTAGGGTGAAGCGTTATCCGGAATTTATTGGGCGTAAAGGGTGCCTAGGCGGCTTTTTAAGTCAGGAGTGAAGGCT  
ACGGCTCAACCGTAGTAAGCTCTTGAAGTGGAGGACTTGAAGTACAGTAGAGGTGGGCGGAATTCGTGGTGTAGCGGTGA  
AATGCTTAGATATCACGAAGAAGTCCGATTGCGAAGGCAGCTCACTAGACTGTCACTGACACTGATGCTCGAAAGTGTGG  
GTATC

>ASV:3533:Family:Ruminococcaceae

TACGTAGGGAGCAAGCGTTATCCGGATTTACTGGGTGTAAGGGTGCCTAGGCGGCTAGGCAAGTCAAGTGTGAAAACCA  
TGGGCTCAACCTGTGGACTGCTTTGAAACTGTTAGCTTGAAGTGAAGTGAAGGTAGGCGGAATTCGGGTGTAGCGGTG  
AAATGCTTAGATATCACGAAGAAGTCCGATTGCGAAGGCAGCTCACTAGACTGTTACTGACACTGATGCTCGAAAGTGTG  
GGTAT

>ASV:3534:Genus:Flavonifractor

TACGTAGGTGGCAAGCGTTATCCGGATTTACTGGGTGTAAGGGTGCCTAGGCGGCTAGGCAAGTCAAGTGTGAAAACCTG  
GGGGCTCAACCTCCAGCCTGCATTTGAAACTGTAGTCTTGAAGTGAAGTGAAGGTAGGCGGAATTCGGTGTAGCGGTG  
AAATGCTTAGATATCACGAAGAAGTCCGATTGCGAAGGCAGCTGCTAAGCTGCAACTGACATTGAGGCTCGAAAGTGTG  
GGTAT

>ASV:3535:Family:Lachnospiraceae

TACGTAGGGGGCAAGCGTTATCCGGAATTTACTGGGTGTAAGGGTGCCTAGGTTGATGGCAAGTCAAGTGTGAGAACCC  
AGGGCTTAACCTGAGGACTGCTTTGAAACTGTGAGACTGGAGTGCAGGAGAGGTAAGCGGAATTCCTAGTGTAGCGGTG  
AAATGCTTAGATATCACGAAGAAGTCCGATTGCGAAGGCAGCTGCTAAGCTGCAACTGACATTGAGGCTCGAAAGTGTG  
GGTAT

>ASV:3536:Genus:Ruminiclostridium\_5

TACGTAGGGAGCAAGCGTTATCCGGATTTACTGGGTGTAAGGGTGCCTAGGCGGCTAGGCAAGTCAAGTGTGAAATCCA  
TGGGCTTAACCCATGAAGTGCCTTTGAAACTGTTAGTCTTGAAGTGAAGTGAAGGTAGGCGGAATTCGGGTGTAGCGGTG  
AAATGCTTAGATATCACGAAGAAGTCCGATTGCGAAGGCAGCTGCTAAGCTGCAACTGACATTGAGGCTCGAAAGTGTG  
GGTAG

>ASV:3537:Family:Lachnospiraceae

TACGTAGGGGGCTAGCGTTATCCGGATTTACTGGGTGTAAGGGAGCGTAGACGGCAGCAAGCCAGATGTGAAAGCCC  
GGGGCTCAACCCGGGACTGCATTTGAAACTGCTGAGCTAGAGTGTGGAGAGGCAAGTGAATTCCTAGTGTAGCGGTG  
AAATGCTTAGATATCACGAAGAAGTCCGATTGCGAAGGCAGCTTACTGGATTGTAAGTGAAGTGTGAGGCTCGAAAGTGTG  
GGTAT

>ASV:3538:Family:Burkholderiaceae

TACGTAGGGTGCAGCGTTAATCGGAATTTACTGGGCGTAAAGCGTGCAGGCGGCTTTGCAAGACAGATGTGAAATCCC

CGGGCTCAACCTGGGAAGTGCATTTGTGACTGCAAGGCTAGAGTGCGGCAGAGGGAGATGGAATTCGCGTGTAGCAGTG  
AAATGCGTAGATATGCGGAGGAACACCCGATGGCGAAGGCAATCTCTGGGCTGCACTGACGCTCATGCACGAAAGCGTG  
GGGAG  
>ASV:3539:Genus:W5053  
TACGTAGGGGGCAACGTTATCCGGAATGATTGGGCGTAAAGGGTACGTAGGCGGCACCTTTAAGTCAGGTGTGAAAGGCA  
TGGGCTCAACCCATGTAAAGCACTTGAAGTGGAGTGCCTTGGAGGAAGGAGAGGAAAGTGAATTCCTAGTGTAGCGGTGA  
AATGCGTAGATATTAGGAGGAATACCGGTGGCGAAGGCGACTTTCTGGACTTTTTCTGACGCTGAGGTACGAAAGCGTGG  
GGAGC  
>ASV:3540:Genus:Bacteroides  
TACGGAGGATCCGAGCGTTATCCGATTTATTGGGTTTAAAGGGAGCGTAGGCGGGTGTAAAGTCAGTTGTGAAAGTTT  
GCGGCTCAACCGTAAAATTGCAAGTTGATACTGGCGACCTTGGAGTGAACAGAGGTAGGCGGAATTCGTGGTGTAGCGGTG  
AAATGCTTAGATATCACGAAGAATCCGATTGCGAAGGCAGCTGCTAAGCTGCAACTGACAGTGAGGCTCGAAAGTGTG  
GGTAT  
>ASV:3541:Family:Ruminococcaceae  
AACGTAGGTCACAAGCGTTGTCCGGAATTACTGGGTGTAAGGGAGCGCAGGCGGGAGAGCAAGTTGGAAGTGAATCCA  
TGGGCTCAACCCATGAACTGCTTTCAAAGTGTCTTTCTTGGAGTAGTGCAGAGGTAGGCGGAATTCGCGGTGTAGCGGTG  
GAATGCGTAGATATCACGAAGAATCCGATTGCGAAGGCAGCTCACTAGACTGTTACTGACACTGATGCTCGAAAGTGTG  
GGTAT  
>ASV:3542:Phylum:Firmicutes  
TACGTAGGTGGCAGCGTTATCCGGAATTATTGGGCGTAAAGAGCGCGCAGGTGGCTGATTAAGTCTGATGTGAAAGCCC  
ACGGCTTAAACCGTGGAGGGTATTGGAAGTGGTGCAGCTTGGAGTGCAGTAGAGGTGGGCGGAATTCGTGGTGTAGCGGTG  
AAATGCTTAGATATCACGAAGAATCCGATTGCGAAGGCAGCTCACTGGAGTGAAGTGCAGCTGATGCTCGAAAGTGTG  
GGTAT  
>ASV:3543:Genus:Butyricicoccus  
TACGTAGGGAGCAAGCGTTATCCGGAATTACTGGGTGTAAGGGCGCGCAGGCGGGCCGGAAGTTGGAAGTGAATCTA  
TGGGCTTAAACCCATAAAGTGTCTTTCAAAGTGTCTTGGAGTGCAGAGGCGAGGCGGAATTCGCGTGTAGCGGTG  
AAATGCGTAGATATACGAGGAACACCAAGTGGCGAAGGCGGCTGCTGGACTGTTACTGACACTGAGGCACGAAAGCGTG  
GGGAG  
>ASV:3544:Genus:Nissabacter  
TACGGAGGATTCGAGCGTTATCCGGAATTATTGGGTTTAAAGGGAGCGTAGGCGGGTGTAAAGTCAGATGTGAAATCCC  
CGAGCTTAACTTGGGAAGTGCATTTGAAAGTGGCAAGCTAGAGTCTTGTAGAGGGGGGTAGAATTCAGGTGTAGCGGTG  
AAATGCGTAGATATCGGAGGAATACCGGTGGCGAAGGTGGCCCCCTGGACAAGACTGACGCTCAGGTGCGAAAGCGTG  
GGGAG  
>ASV:3545:Phylum:Firmicutes  
TACGTAGGTGGCAGCGTTATCCGGAATTATTGGGCGTAAAGGAGCGCGCAGGTGGTGTAAAGTCTGATGTGAAAGCCC  
ACGGCTTAAACCGTGGAGGGTATTGGAAGTGCCTGCTTGGAGTGCAGGAGAGGTAAAGCGGAATTCCTAGTGTAGCGGTG  
AAATGCGTAGATATTAGGAGGAACACCAAGTGGCGAAGGCGGCTTACTGGACGGTAACTGACGTTGAGGCTCGAAAGCGTG  
GGGAG  
>ASV:3546:Family:Lachnospiraceae  
TACGTATGGTGCAAGCGTTATCCGGAATTACTGGGTGTAAGGGTGCAGTGGTGGTGGAGACAAGTCTGAAGTAAAATCC  
GGGGCTTAAACCCGGAAGTGTCTTTGGAAGTGCCTGACTAGAGTACAGGAGAGGTGGGCGGAATTCGTGGTGTAGCGGTG  
AAATGCTTAGATATCACGAAGAATCCGATGCGAAGGCAGCTCACTGGACTGCAACTGACACTGATGCTCGAAAGTGTG  
GGTAT  
>ASV:3547:Class:Gammaproteobacteria  
TACGGAGGGTGAAGCGTTAATCAGAATAACTGGGCGTAAAGCGCACGCAGGCGGTTTCTAAGCTAGATGTGAAAGCCC  
CGGGCTCAACCTGGGAAGTGCATTTAGAAGTGGCGAAGTGCAGTCTTGTAGAGGGGGTAGAATTCAGGTGTAGCGGTG  
AAATGCGTAGATATCGGAGGAATACCGGTGGCGAAGGCGGCCCCCTGGACAGAGACTGACGCTCAGGTGCGAAAGCGTG  
GGGAG  
>ASV:3548:Species:curvatus  
TACGTAGGTGGCAAGCGTTGTCCGGAATTATTGGGCGTAAAGCGAGCGCAGGCGGTTTCTAAGTCTGATGTGAAAGCCT  
TCGGCTCAACCGAAGAAGTGCATCGGAAACTGGGGAAGTGGAGTGCAGAAGAGGACAGTGGAACTCCATGTGTAGCGGTG  
AAATGCGTAGATATTGGAAGAACACCAAGTGGCGAAGGCGGCTGTCTGGTCTGTAAGTGCAGCTGAGGCTCGAAAGCATG  
GGTAG  
>ASV:3549:Genus:Lachnoclostridium  
TACGTAGGGGGCAAGCGTTATCCGGAATTACTGGGTGTAAGGGAGCGTAGACAGCTTAGCAAGTCTGAAGTAAAAGCCC  
GGGGCTCAACCCGGGACTGCTTTGGAAGTGTAAAGCTGGAGTGCAGGAGGTAAAGCGGAATTCCTAGTGTAGCGGTG  
AAATGCGTAGATATTAGGAGGAACACCAAGTGGCGAAGGCGGCTTACTGGACAGTAACTGACGTTGAGGCTCGAAAGCGTG  
GGGAG  
>ASV:3550:Genus:Bacteroides  
TACGGAGGATCCGAGCGTTATCCGATTTATTGGGTTTAAAGGGAGCGTAGATGGATGTTAAGTCAGTTGTGAAAGTTT  
GCGGCTCAACCGTAAAATTGCAAGTTGATACTGGGTACCTTGGAGTGCAGCATAGGTAGGCGGAATTCGTGGTGTAGCGGTG  
AAATGCTTAGATATCACGAAGAATCCGATTGCGAAGGCAGCTTCTGGACTGTAAGTGCAGCTGATGCTCGAAAGTGTG  
GGTAT  
>ASV:3551:Genus:Ruminococcaceae\_UCG-014  
TACGTAGGGAGCAAGCGTTATCCGGAATTATTGGGTGTAAGGGTGCAGTGGAGGAAATAAGTTAGTTGTGAAATCCC  
TCGGCTTAACTGAGGAAGTGCATAAAGTGTCTTGGAGTGGAGAGGAAAGTGAATTCCTAGTGTAGCGGTG  
AAATGCGTAGATATTAGGAGGAACACCAAGTGGCGAAGGCGACTTTCTGGACAGTAACTGACGTTGAGGCACGAAAGTGTG  
GGGAG

>ASV:3552:Species:champanellensis  
TACGTAGGGAGCGAGCGTTGTCCGGAATTACTGGGTGTAAGGGAGCGTAGGCGGGATTGCAAGTCAGATGTGAAAACCTA  
TGGGCTTAACCCATAGACTGCATTTGAAACTGTAGTCTTGAGTGAAGTAGAGGTAAAGCGGAATTCCTAGTGTAGCGGTG  
AAATGCGTAGATATTAGGAGGAACATCGGTGGCGAAGGCGGCTTACTGGGCTTTTACTGACGCTGAGGCTCGAAAGCGTG  
GGGAG

>ASV:3553:Family:Clostridiales\_vadinBB60\_group  
TACGTAGGATGCAAGCGTTATCCGGAATGACTGGGCGTAAAGGGTGCCTAGGTGGTTTGCAAGTTGGCAGCGTAATTCC  
GTGGCTTAACCCGGAAGTACTGCCAAAAGTGGTAGGCTTGGAGTGCAGGCGAGGATGTGGAATTCCTAGTGTAGCGGTG  
GAATGCGTAGATATTAGGAGGAACACCGGTGGCGAAAGCGACATACTGGGCGTAACTGACACTGAGGCACGAAAGCGTG  
GGGAG

>ASV:3554:Genus:Christensenellaceae\_R-7\_group  
TACGTAGGGGCGAGCGTTGTCCGGAATGACTGGGCGTAAAGGGTGCCTAGGCGCCCTGCAGGTCAGATGTGAAATACC  
CGGGCTTAACATGGAAGTGCATTTGAAACTGTAGGCTTGGAGTGCAGGAGGTAAGTGAATTCCTGGTGTAGCGGTG  
AAATGCGTAGAGATCGGAGGAACACCCAGTGGCGAAGGCGACTTACTGGGCGCAACTGACGCTGAGGCACGAAAGCGTG  
GGGAG

>ASV:3555:Family:Ruminococcaceae  
TACGTAGGTGGCAAGCGTTGTCCGATTTACTGGGTGTAAGGGGCGTGTAGCCGGGAGGGCAAGTCAGATGTGAAATCCA  
CGGGCTTAACCCGGAAGTGCATTTGAAACTGTCCGAACTTGGAGTGAAGTAGAGGTAGGCGGAATTCCTGGTGTAGCGGTG  
AAATGCTTAGAGATCATACAGAACACCCAGTGGCGAAGGCGACTTACCAAATATATCTGACGTTGAGGCACGAAAGCGTG  
GGGAG

>ASV:3556:Genus:Ruminiclostridium\_5  
TACGTAGGGAGCAAGCGTTGTCCGATTTACTGGGTGTAAGGGTGCCTAGGCGGCTCGGCAAGTCAGAGGTGAAATCCA  
TGGGCTTAACCCGGAAGTGCATTTGAAACTGTCCGAACTTGGAGTGAAGTAGAGGTAGGCGGAATTCCTGGTGTAGCGGTG  
AAATGCGTAGAGATCGGAGGAACACCCAGTGGCGAAGGCGGCTTACTGGGCTGTAAGTACGCTGAGGCACGAAAGCATG  
GGTAG

>ASV:3557:Family:Lachnospiraceae  
AACGTAGGTCAACAAGCGTTGTCCGGAATGACTGGGTGTAAGGGAGCGAGGCGGTACGGCAAGTCTGATGTGAAATCCC  
GGGGCTCAACCCGGAAGTGCATTTGAAACTGTCCGAACTTGGAGTGAAGTAGAGGTAGGCGGAATTCCTAGTGTAGCGGTG  
AAATGCGTAGATATCACGCAGAATCCGATTGCGAAGGCGACTTACTAAACCATAACTGACACTGAAGCACGAAAGCGTG  
GGGAT

>ASV:3558:Genus:Bilophila  
TACGGAGGGTCAAGCGTTAATCGGAATCACTGGGCGTAAAGGCGCACGTAGGCGGCCCGGTAAGTCAGGGGTGAAATCCC  
ACAGCCCAACTGTGGAACTGCATTTGATACTGCCAGGCTTGGAGTACCAGGAGAGGGTGGCGGAATTCAGGTGTAGGAGTG  
AAATCCGTAGATATCTGGAGGAACACCGGTGGCGAAGGCGCCACCTGGACGGTAACTGACGCTGAGGTGCGAAAGCGTG  
GGTAG

>ASV:3559:Family:Lachnospiraceae  
TACGTATGGTCAAGCGTTATCCGGAATGACTGGGTGTAAGGGAGCGTAGACGGAGTGGAAGTCTGATGTGAAAACCC  
GGGGCTCAACCCGGAAGTGCATTTGAAACTGTCAATCTGGAGTACCAGGAGAGGTAATCGGAATTCCTGTGTAGCGGTG  
AAATGCTTAGATATCACGAAGAATCCGATTGCGAAGGCGACTTACTAGACTGTTACTGACACTGATGCTCGAAAGTGTG  
GGTAT

>ASV:3560:Order:Bacteroidales  
TACGGAGGATGCGAGCGTTATCCGGATTTATTGGGTTAAAGGGTGCCTAGGTGGTAATTTAAGTCAGCGGTGAAAGTTT  
GTGGCTCAACCATAAAATTGCCGTTGAAACTGGGTTACTTGGAGTGTGTTTGGAGTAGGCGAAATGCGTGGTGTAGGGGTG  
AAATGCGTAGAGATTAGGAAGAACACCGGTGGCGAAGGCGACTTCTGGACGAAAACGACGCTGAGGCGCGAAAGCGTG  
GGGAG

>ASV:3561:Order:Bacteroidales  
TACGTAGGGAGCAAGCGTTATCCGGATTTATTGGGTGTAAGGGTGCCTAGACGGGAAATTAAGTTAGTTGTGAAAGCCC  
TCGGCTTAACCTGAGGAATTGCAACTAAAAGTGGTTTTCTTGGAGTGCAGTAGAGGTAGGCGGAATTCGTGGTGTAGCGGTG  
AAATGCTTAGATATCACGCAGAATCCGATTGCGAAGGCGACTTCTAGACTGTTACTGACACTGATGCTCGAAAGTGTG  
GGTAT

>ASV:3562:Species:ventriculi  
TACGTAGGTGGCAAGCGTTATCCGGATTTACTGGGCGTAAAGGGAGCGTAGGCGGATATTTAAGTGGGATGTGAAATACC  
CGAGCTTAACCTGGGAGCTGCATTTCAAAGTGGATATCTAGAGTGCAGGAGAGGAGAATGGAATTCCTAGTGTAGCGGTG  
AAATGCGTAGAGATTAGGAAGAACACCCAGTGGCGAAGGCGATTCTCTGGACTGTAAGTACGCTGAGGCTCGAAAGCGTG  
GGGAG

>ASV:3563:Family:Lachnospiraceae  
TACGTAGGGGCGCAAGCGTTATCCGGATTTACTGGGTGTAAGGGAGCGTAGACGGCGAAGCAAGTCTGAAGTAAAAGCCC  
GGGGCTCAACCCGGAATGCTTTGAAACTGTTTTGCTGGAGTGCAGGAGAGGCAAGCGGAATTCCTAGTGTAGCGGTG  
AAATGCGTAGATATTAGGAGGAACACCCAGTGGCGAAGGCGGCTTCTGGACTGTAAGTACGCTTGGGCTCGAAAGCGTG  
GGGAG

>ASV:3564:Order:Clostridiales  
AACGTAGGTCAACAAGCGTTGTCCGGAATGACTGGGTGTAAGGGGCGTGTAGGCGGGATCGCAAGTCAGATGTGAAAACCTG  
GAGGCTCAACCTCCAGCCTGCATTTGAAACTGTGGTTCTTGGAGTGCAGGAGGCGAGCGGAATTCCTAGTGTAGCGGTG  
AAATGCTTAGATATCACGAAGAATCCGATTGCGAAGGCGACTTCTGGACTGTAAGTACGCTGATGCTCGAAAGTGTG  
GGTAT

>ASV:3565:Family:Ruminococcaceae  
TACGTAGGGAGCGAGCGTTGTCCGATTTACTGGGTGTAAGGGTGCCTAGGCGGGTCAAGTCAGGCGTGAATCCC  
ACGGCTCAACTGTGGGCTGCGCTTGAAGTGTAGATCTTGGAGTGAAGTAGAGGCAAGCGGAATTCCTAGTGTAGCGGTG

AAATGCGTAGATATTAGGAGGAACACCAGTGGCGAAGGCGGCTTGTGGGCTTTAACTGACGCTGAGGCACGAAAGCATG  
GGGAG  
>ASV:3566:Class:Bacteroidia  
TACGTAGGATCCGAGCGTTATCCGGATTTATTGGGTTAAAGGGAGCGTAGGCGGGTTGTTAAGTCAGTTGTGAAAATTT  
GCGGCTCAACCGTAAAATTGCAGTTGATACTGGCGACCTTGAGTGTGGAGAGGTAGACGGAATTCCTTGTGTAGCGGTG  
AAATGCGTAGATATAAGGAGGAACACCAGTGGCGAAGGCGACTTTCTGGACAGTAACTGACGTTGAGGCACGAAAGTGTG  
GGGAG  
>ASV:3567:Genus:Bacteroides  
TACGTAGGTGGCAAGCGTTATCCGGAATTAAGGGAGCGGGCGGGATAGCAAGTCAGCTGTGAAAACCTA  
TGGGCTCAACCCATAAACTGCAGTTGAAACTGTTATTCTTGAGTGCAGTTGAGGCAGCGGAATTCGTGGTGTAGCGGTG  
AAATGCTTAGATATACGAAGAAGCTCCGATTGCGAAGGCAGCCTGCTAAGCTGCAACTGACATTGAGGCTCGAAAGTGTG  
GGTAT  
>ASV:3568:Family:Peptococcaceae  
TACGTAGGGAGCAAGCGTTGTCCGGAATTAAGGGAGCGCGAGGTGGACATTTAAGTCAGATGTGAAAACCTC  
TGGGCTCAACTTGGAGATTGCATTTGAAACTGGACGCTTGAGGGTAGGAGAGGAAAGTGAATTCCTAGTGTAGCGGTG  
AAATGCGTAGATATTAGGAGGAACACCAGTGGCGAAGGCGACTTTCTGGACTATACCTGACACTGAGGCAGCGAAAGCGTG  
GGGAG  
>ASV:3569:Family:Muribaculaceae  
TACGGAGGATGCGAGCGTTATCCGATTTATTGGGTTAAAGGGTGCAGGCGGAAGATCAAGTCAGCGGTAAAATTTGA  
GAGGCTCAACCTCTTCGAGCCGTTGAAACTGGTTTTCTTGAGTGCAGGAGAAGTATGCGGAATGCGTGGTGTAGCGGTGA  
AATGCATAGATATCACGAGAAGCTCCGATTGCGAAGGCAGCATAACCGCGCTCAACTGACGCTCATGCACGAAAGTGTG  
GTATC  
>ASV:3570:Genus:Bacteroides  
TCCTTCTTCTCTCTCTCTCTCTCTCTCTCTGGGTTAAAGGGAGCGTAGATGGATGTTAAGTCAGTTGTGAAAATTT  
GCGGCTCAACCGTAAAATTGCAGTTGATACTGGATGCTTGAGTGCAGTTGAGGCAGCGGAATTCGTGGTGTAGCGGTG  
AAATGCTTAGATATCACGAAGAAGCTCCGATTGCGAAGGCAGCCTGCTAAGCTGCAACTGACATTGAGGCTCGAAAGTGTG  
GGTAT  
>ASV:3571:Family:Lachnospiraceae  
TACGGAGGATCCGAGCGTTATCCGATTTACTGGGTGTAAGGGAGTGTAGGTGGTATCACAAAGTCAGAAGTAAAAGCCC  
GGGGCTCAACCCCGGACTGCTTTTGAAGTGTGAACTGGAGTGCAGGAGAGGTAAGTGAATTCCTAGTGTAGCGGTG  
AAATGCGTAGATATCACGAAGAAGCTCCGATTGCGAAGGCAGCCTGCTAAGCTGCAACTGACATTGAGGCTCGAAAGTGTG  
GGTAT  
>ASV:3572:Genus:Ruminococcaceae\_UCG-005  
TACGTAGGTGGCAAGCGTTGTCCGATTTACTGGGTGTAAGGGCGTGTAGGCGGGCTGCAAGTCAGAAGTAAAATCCA  
TGGGCTTAACCCATGAAGTGTCTTTGAAACTGTGGCTCTTGAGTATCGGAGAGGCAGCGGAATTCCTAGTGTAGCGGTG  
AAATGCGTAGATATTAGGAGGAACACCAGTGGCGAAGGCGGCTGCTGGACGACAAGTGCAGCTGAGGCAGCGAAAGCGTG  
GGGAG  
>ASV:3573:Family:Lachnospiraceae  
TACGTATGGAGCAAGCGTTATCCGATTTACTGGGTGTAAGGGTGCAGTGGCAGTGCAGTGCAGTGTGAAAAGGCC  
GGGGCTCAACCTCGGAGCTGCATTTGAAACTGCTCGGCTAGAGTACAGGAGAGGCAGCGGAATTCCTAGTGTAGCGGTG  
AAATGCGTAGATATTAGGAGGAACACCAGTGGCGAAGGCGGCTTTCTGGACTGACACTGACGCTGAGGCTCGAAAGCGTG  
GGGAG  
>ASV:3574:Genus:Parabacteroides  
TACGGAGGATCCGAGCGTTATCCGATTTATTGGGTTAAAGGGAGCGTAGGTGGATTGTTAAGTCAGCGGTAAAATTT  
GTGGCTTAACCCATAAAATTGCCGTTGAAACTGGGAACTTGAGTGTGTTTGAGGTAGCGGAATGCGTGGTGTAGCGGTG  
AAATGCGTAGATATGACGCAGAAGCTCCGATTGCGAAGGCAGCATAACCACTCGGACTGACGCTGAGGCTCGAAAGCGTG  
GGTAT  
>ASV:3575:Family:Lachnospiraceae  
TACGTAGGGGCAAGCGTTATCCGATTTACTGGGTGTAAGGGAGCGTAGACGGCAGCGCAAGTCTGAAGTAAAAGCCC  
GGGGCTCAACCCCGAATGGCTTTGAAACTGTGCACTAGAGTACCGGAGGGGTAAGCGGAATTCCTAGTGTAGCGGTG  
AAATGCGTAGATATTAGGAGGAACACCAGTGGCGAAGGCGGCTTACTGGACGATAACTGACGCTGAGGCTCGAAAGCGTG  
GGGAG  
>ASV:3576:Genus:Lachnospiraceae\_UCG-004  
TACGGAGGATGCGAGCGTTATCCGATTTACTGGGTGTAAGGGAGCGTAGACGGCAGCGCAAGTCTGAAGTAAAATACC  
CGGGCTCAACCTGGGAACTGCTTTGAAACTGTGTTGCTAGAGTGTGGAGAGGTAAGCGGAATTCCTAGTGTAGCGGTG  
AAATGCGTAGATATTAGGAAGAAGCTCCGATTGCGAAGGCAGCCTGCTAAGCTGCAACTGACATTGAGGCTCGAAAGTGTG  
GGTAT  
>ASV:3577:Kingdom:Bacteria  
AACGTAGGTACAAGCGTTGTCCGGAATTAAGGGTGTGTAGGCGGGCAACAAGTCAGATGTGAAAACCTA  
TGGGCTTAACCCATAGCCTGCATTTGAAACTGTATGTCTTGAGGATGGGAGAGGTAATGGAATTCCTGGTGTAGCGGTG  
AAATGCGTAGATATCACGAAGAAGCTCCGATTGCGAAGGCAGCTCACTGGAGCGCAACTGTGCTGAGCTCGAAAGTGTG  
GGTAT  
>ASV:3578:Family:Ruminococcaceae  
TACGTAGGTGGCAAGCGTTGTCCGGAATTAAGGGAGCGTAGGCGGGAAGGCAAGTTGGAAGTAAAATGTA  
TGGGCTTAACCCATAAACTGCTTTCAAAGTGTGTTCTTGAGTGAAGTAGAGGCAGCGGAATTCCTAGTGTAGCGGTG  
AAATGCGTAGATATTAGGAGGAACACCAGTGGCGAAGGCGGCTTACTGGACGTTAAGTGCAGTTGAGGCTCGAAAGCGTG  
GGGAG  
>ASV:3579:Family:Lachnospiraceae



TACGGAGGATCAAGCGTTATCCGGATTTATTGGGTTAAAGGGTGCCTAGGCGGTTTGATAAGTTAGAGGTGAAAGCCC  
GGGGCTCAACCCCGGGACTGCTTTGAAAAGTCTTCTGCTAGAGTGCCTGGAGAGGTAAGTGAATTCCTAGTGTAGCGGTG  
AAATGCGTAGATATTAGGAGGAACACCCAGTGGCGAAGGCGGCTTACTGGACAGTAACGACGTTGAGGCTCGAAAGCGTG  
GGGAG

>ASV:3580:Genus:Lachnospiraceae\_FCS020\_group

TACGTAGGGGGCAAGCGTTATCCGGATTTACTGGGTGTAAAGGGAGCGTAGGTGGCATGGCAAGCCAGAAGTAAAACCC  
GGGGCTTAACCCCGGGATTGCTTTTGGAACTGCCAGGCTGGAGTGCAGGAGAGGCAGGCGGAATTCCTAGTGTAGCGGTG  
GAAATGCGTAGATATTAGGAGGAACACCCGGTGGCGAAGGCGGCTTACTGGACTGTAACCTGACACTGAGGCTCGAAAGCGTG  
GGGA

>ASV:3581:Kingdom:Bacteria

TACGTAGGGAGCAAGCGTTGTCCGGATTTACTGGGTGTAAAGGGTGCCTAGGCGGCTTTGCAAGTCAGATGTGAAATCTA  
TGGGCTCAACCCATAGACTGCAGTTGAAACTGCTCATCTTGAAGTGAAGTAGAGGTTGGCGGAATTCGAGTGTAGCGGTG  
AAATGCTTAGATATCACGAAGAACCCGATTGCGAAGGCAGCTCACTAGACTGTTACTGACACTGATGCTCGAAAGTGTG  
GGTAT

>ASV:3582:Genus:Lachnospiraceae\_UCG-004

TACGTAGGGGGCAAGCGTTATCCGGATTTACTGGGTGTAAAGGGAGCGTAGACGGCGACGCAAGTCTGAAGTAAAATACC  
CGGGCTCAACTTGGAACTGCTTTGAAAAGTGTGTTGCTAGAGTGCCTGGAGAGGTAAGCGGAATTCCTAGTGTAGCGGTG  
AAATGCGTAGATATTAGGAGGAACACCCAGTGGCGAAGGCGGCTTACTGGACAGTAACGACGTTGAGGCTCGAAAGCGTG  
GGGAG

>ASV:3583:Phylum:Bacteroidetes

TACGTAGGGAGCAAGCGTTGTCCGGATTTACTGGGTGTAAAGGGTGCCTAGGCGGCAATGCAAGTCAGATGTGAAATCTA  
TGGGCTCAACCCATAAACTGCATTTGAAACTGCGTTGCTTGAAGTGAAGTAGAGGTTGGCGGGATTCTGTTGTAGCGGTG  
AAATGCTTAGATATCACGAAGAACCCGATTGCGAAGGCAGCTCACTAGACTGTTACTGACACTGATGCTCGAAAGTGTG  
GGTAT

>ASV:3584:Genus:Lachnospira

TACGGAGGATCCGAGCGTTATCCGGATTTACTGGGTGTAAAGGGAGTGTAGGTGGCATCACAAAGTCAGAAGTGAAAGCCC  
GGGGCTCAACCCCGGGACTGCTTTTGGAACTGTGGAGCTGGAGTGCAGGAGAGGCAAGTGAATTCCTAGTGTAGCGGTG  
AAATGCTTAGATATCACGAAGAACCCGATTGCGAAGGCAGCCTGCTGGACTGTAACGACGCTGATGCTCGAAAGTGTG  
GGTAT

>ASV:3585:Genus:Ruminococcaceae\_UCG-010

TACGTAGGTGGCGAGCGTTATCCGGATTTACTGGGTGTAAAGGGTGTAGGCGGGACTGCAAGTCGGATGTGAAAATTA  
CAGGCTTAACCTGTGACCTGCATTGAAACTGTGTTCTTGAAGGTCGGAGAGGTAACGGAATTCCTGGTGTAGCGGTG  
AAATGCGTAGATATCACGAAGAACCCGATTGCGAAGGCAGCCTGCTGGACTGTAACGACGCTGATGCTCGAAAGTGTG  
GGGAG

>ASV:3586:Genus:Alloprevotella

TACGGAGGGTGAAGCGTTAATCGGAATTTACTGGGCGTAAAGCGCACGAGGCGGTTTGTAAAGTCAGATGTGAAATACG  
GCGGCTCAACCCGTAAGTGCATCTGATACTGGAGGCTTGAAGTGCACACAGGATACTGGAATTCACGGTGTAGCGGTG  
AAATGCTCAGATATCATGAAGAATCCAATCGCAAGGCAGGTATCCGGGTGCAACTGACGCTGAGGCTCGAAAGTGTG  
GGTAT

>ASV:3587:Kingdom:Bacteria

TACGTAGGTGGCGAGCGTTGTCCGGAATTTATTGGGCGTAAAGGACAGCTAGGCGGCTTAATAAGTCGAGCGTGAAAATGC  
GGGGCTCAACCCGTAAGTGCATCTGATACTGGAGGCTTGAAGTGCACACAGGATACTGGAATTCACGGTGTAGCGGTG  
AATGCTTAGATATCACGAAGAACCCGATTGCGAAGGCAGCTCACTAGACTGTCACTGACACTGATGCTCGAAAGTGTG  
GTATC

>ASV:3588:Order:Clostridiales

AACGTAGGGGGCGAGCGTTGTCCGGAATCACTGGGCGTAAAGGGCGCGTAGGCGGCTAGTAAGTCAGATGTGAAAAGTG  
AGGGCTCAACCCGTAAGTGCATCTGATACTGCTAGGCTTGAAGTGCACACAGGATACTGGAATTCACGGTGTAGCGGTG  
AAATGCGTAGATATTAGGAGGAACACCCAGTGGCGAAGGCGGCTTCTGGGCCGAAACTGACGCTGAGGCGCAAGCGGTG  
GGGAG

>ASV:3589:Genus:Alistipes

TACGGAGGATCAAGCGTTATCCGGATTTATTGGGTTAAAGGGTGCCTAGGCGGTTTGATAAGTTAGAGGTGAAATCCC  
GGGGCTTAACCTCCGGAACCTCTAATACTGTTAGACTAGAGAGTAGTTGCGGTAGGCGGAATGTATGGTGTAGCGGTG  
AAATGCGTAGATATTAGGAGGAGCACCCGTTGGCGAAGGCGGTCAACTGGACGATAACTGACACTGAAGCACGAAAGCGTG  
GGGAT

>ASV:3590:Order:Clostridiales

TACGTAGGGGGCAAGCGTTATCCGGATTTACTGGGTGTAAAGGGTGCCTAGGCGGCGACGCAAGTCAGCGGTGAAATTT  
CGGGCTCAACCCGAGTGTGCGGTTGAAACTGCTCGGCTAGAGTACAGGAGAGGCAGGCGGAATTCCTAGTGTAGCGGTG  
AAATGCGTAGATATTAGGAGGAACACCCAGTGGCGAAGGCGGCTTCTGGACTGTAACGACGCTGAGGCGCAAGCGGTG  
GGGAG

>ASV:3591:Genus:Ruminiclostridium

TACGTAGGTGGCAAGCGTTGTCCGGATTTACTGGGTGTAAAGGGTGCCTAGGCGGCGGCTGGTAAGTCAGATGTGAAATCTA  
TGGGCTCAACCCATAAATGCAATTTGAAACTGCTAGTCTTGAAGTACTGGAGAGGCAGACGGAATTCCTAGTGTAGCGGTG  
AAATGCGTAGATATTAGGAGGAACACCCAGTGGCGAAGGCGGCTGCTGGACAGCAACTGACGCTGAGGCGCAAGCGGTG  
GGGAG

>ASV:3592:Genus:Dorea

TACGTAGGGGGCAAGCGTTATCCGGATTTACTGGGTGTAAAGGGAGCGTAGACGGCTGTGCAAGTCTGAAGTAAAAGGCA  
TGGGCTCAACCTGTGGACTGCTTTGAAAAGTGTGAGCTAGAGTGTGGAGAGGTAAGTGAATTCCTAGTGTAGCGGTG  
AAATGCGTAGATATTAGGAGGAACATCAGTGGCGAAGGCGGCTTACTGGACGATGACTGACGTTGAGGCTCGAAAGCGTG

GGGAG

>ASV:3593:Kingdom:Bacteria

TACGTAGGGGGCAAGCGTTGTCCGGATTTACTGGGTGTAAGGGGCGCGTAGGCGGTAGGCAAGTCAGACGTGAAAACCA  
TGGGCTCAACCTGTGGACTGCGTTTAAACTGTTTAGCTTGAGTGAAGTAGAGGTAGCGGAATTCGTGGTGTAGCGGTG  
AAATGCTTAGATATCACGAAGAACTCCGATTGCGAAGGCAGCCTGCTAAGCTGCAACTGACATTGAGGCTCGAAAGTGTG  
GGTAT

>ASV:3594:Genus:UBA1819

TACGGAGGGTGCAGCGTTAATCGGAATTACTGGGTGTAAGGGAGCGCAGGCGGATTGGCAAGTTGGGAGTGAATCTA  
TGGGCTCAACCCATAAGTTGCTTTCAAACCTGTCAGTCTTGAGTGGTGTAGAGGTAGCGGAATTCCTGGTGTAGCGGTG  
GAATGCGTAGATATCGGGAGGAACACCAGTGGCGAAGGCGGCTTACTGGACGATGACTGACGTTGAGGCTCGAAAGCGTG  
GGGAG

>ASV:3595:Family:Lachnospiraceae

TACGTAGGGGGCAAGCGTTATCCGGATTTACTGGGTGTAAGGGAGCGTAGGCGCCATGCAAGTCAGAAGTAAAAGCC  
GGGGCCCAACCCGGGACTGCTTTTAAACTGCAAGGCTTATTGCGGAGAGGTAAGCGGAATTCCTAGTGTAGCGGTG  
AAATGCGTAGATATTAGGAGGAACACCAGTGGCGAAGGCGGCTTACTGGACGGTAAATGACGCTGATGCTCGAAAGCGTG  
GGGAG

>ASV:3596:Family:Lachnospiraceae

TACGGAGGATCCGAGCGTTATCCGGATTTATTGGGTTAAAGGGAGCGCAGGCGGTGCGGAAGTCTGATGTAAAAGCC  
GGGGCTCAACCCCGGTACTGCATTGAAACTGTCGGACTAGAGTGTGCGGAGGGTAAGTGAATTCCTAGTGTAGCGGTG  
AAATGCGTAGATATCACGAAGAACTCCGATTGCGAAGGCAGCCTGCTAAGCTGCAACTGACATTGAGGCTCGAAAGTGTG  
GGTAT

>ASV:3597:Family:Ruminococcaceae

TACGGAGGATCCGAGCGTTATCCGGATTTATTGGGTTAAAGGGAGCGCAGGCGGTCGTTAAGTCAGCTGTAAAAGTT  
GGGGCTCAACCTTAAACTGCATTTGAAACTGTGGTCTTGAGTGAAGTAGAGGTAAGCGGAATTCCTAGTGTAGCGGTG  
AAATGCGTAGATATTAGGAGGAACATCAGTGGCGAAGGCGGCTTACTGGGCATCAACTGACGCTGAGGCTCGAAAGTGTG  
GGTAG

>ASV:3598:Order:Bacteroidales

TACGGGGGATCCGAGCGTTATCCGGATTTACTGGGTTAAAGGGAGCGTAGGCTGTGCGTCAAGTCAGGGGTGAAATCC  
GGGGCTCAACTCCGGGCTGCCCTTGGTACTGTCGCGCTGGAGTGCAGGATGCCGCCGAGGAGTGCCTGGTGTAGCGGTG  
AAATGCTTAGATATCACGAAGAACTCCGATTGCGAAGGCAGCACACTAAGCCGTAAGTACGCTTATGCTCGAAAGTGTG  
GGTAT

>ASV:3599:Family:Ruminococcaceae

TACGTAGGGAGCGAGCGTTGTCCGGATTTACTGGGTGTAAGGGAGCGTAGGCGGGATCGCAAGTCAGATGTAAAAGCTA  
TGGGCTTAACCCATAAACTGCATTTGAAACTGTGGTCTTGAGTGAAGTAGAGGTAAGCGGAATTCCTAGTGTAGCGGTG  
AAATGCGTAGATATTGGGAGGAACACCAGTGGCGAAGGCGCCTTCTGGACTGTGCTGACGCTGAGATGCGAAAGCCAG  
GGTAG

>ASV:3600:Phylum:Firmicutes

TACGGAGGATCCGAGCGTTATCCGGATTTATTGGGTGTAAGGGAGCGTAGGCGGGATCGCAAGTCAGATGTAAAAGCTA  
TGGGCTTAACCCATAAACTGCATTTGAAACTGTCAGACTTGAGTGCAGAAGAGGACAGTGAATCCATGTGTAGCGGTG  
GAATGCGTAGATATATGGAAGAAACACCAGTGGCGAAGGCGGCTGCTGGTCTGCAACTGACGCTGAGGCTCGAAAGCATG  
GGTAG

>ASV:3601:Genus:Ruminococcaceae\_NK4A214\_group

TACGTAGGTGGCAAGCGTTGTCCGGATTTACTGGGTGTAAGGGGCGCGTAGGCGGGGCGCAAGTCAGATGTAAAAGCTA  
TGGGCTTAACCCATAAACTGCATTTGAAACTGTTGTTCTTGAGTGTGCGGAGAGGTAGATGGAATTCCTAGTGTAGCGGTG  
AAATGCGTAGATATTAGGAGGAACACCAGTGGCGAAGGCGGCTTACTGGACGATAACTGACGCTGAGGCGCGAAAGCGTG  
GGGAG

>ASV:3602:Genus:Blautia

TACGTAGGGGGCAAGCGTTATCCGGATTTACTGGGTGTAAGGGAGCGTAGACGGTGTGCAAGTCTGATGTAAAAGGCG  
GGGGCTCAACCCCTGGACTGCATTGAAACTGTGACACTCGAGTGCAGGAGAGGTAAGCGGAATTCCTAGTGTAGCGGTG  
AAATGCGTAGATATTAGGAGGAACACCAGTGGCGAAGGCGGCTTACTGGACGGTAACTGACGTTGAGGCTCGAAAGCGTG  
GGGAG

>ASV:3603:Genus:Sellimonas

TACGTATGGTGAAGCGTTATCCGGATTTACTGGGTGTAAGGGAGCGTAGACGGATAGGCAAGTCTGGAGTAAAAGCC  
AGGGCTCAACCTTGGGACTGCTTTGAAACTGCAGATCTGGAGTGCAGGAGAGGTAAGCGGAATTCGTGGTGTAGCGGTG  
AAATGCTTAGATATCACGAAGAACTCCGATTGCGAAGGCAGCCTGCTAAGCTGCAACTGACATTGAGGCTCGAAAGTGTG  
GGTAT

>ASV:3604:Family:Lachnospiraceae

TACGGAGGATTCAGCGTTATCCGGATTTATTGGGTGTAAGGGAGCGTAGACGGAGTGGCAAGTCTGATGTAAAAGCC  
GGGGCTCAACCCCGGACTGCATTGAAACTGCCCGTCTTGAGTGCAGGAGAGGTAAGCGGAATTCCTAGTGTAGCGGTG  
GAATGCGTAGATATCGGGAGGAACACCAGTGGCGAAGGCGGCTTACTGGACGCAACTGACGCTGAGGCTCGAAAGTGTG  
GGTAG

>ASV:3605:Family:Lachnospiraceae

TACGTAGGGGGCAAGCGTTATCCGGATTTACTGGGTGTAAGGGAGCGTAGACGGTCAAGCAAGTCAAGAAGTAAAAGGCT  
GGGGCTCAACCCCGGACTGCTTTTAAACTGTTTACTAGAGTGTGCGGAGAGGTAAGCGGAATTCCTAGTGTAGCGGTG  
AAATGCGTAGATATTAGGAGGAACACCGTGGCGAAGGCGGCTTCTGGACTGTAAGTACGCTGAGGCGCGAAAGCGTG  
GGGAG

>ASV:3606:Genus:Solobacterium

TACGTAGGTAGCGAGCGTTATCCGGATTTATTGGGCTAAAGGGTGCAGGCGGCTGTTAAGTTTATGGTAAAAGCGT

GGGGCTCAACCCATAAAGCCATAGATACTGGCAGGCTAGAGTACTGGAGAGGGTAGTGAATTCCATGTGTAGCGATAA  
AATGCGTAGATATATGGAAGAACACCGGTGGCGAAGGCGGCCGTCTGGTCTGGATTCTGACACTGAAGCACGAAAGCGTG  
GGGAG  
>ASV:3607:Family:Lachnospiraceae  
TACGTAGGGGGCAAGCGTTATCCGGAATTACTGGGTGTAAGGGTGCCTAGGTGGTATGGCAAGTCAGAAGTGAAAACCC  
AGGGCTTAACCTCGGACTGCTTTTAAAAGTGCAGACTAGAGTGCAGGAGAGGTAAGCGGAATTCCTAGTGTAGCGGTG  
AAATGCTTAGATATCATGAAGAATCCGATCGCAAGGCATATGTCCGGAGTCAACTGACGCTGAGGCGCAAAGTGTG  
GGTAT  
>ASV:3608:Family:Bifidobacteriaceae  
TACGTAGGGTGAAGCGTTATCCGGAATTATTGGGCGTAAAGGGCCCGTAGGCGGTTCTGCGCTCCGGTGTGAAAAGTCC  
ATCGCTTAACCGTGGATCCGCGCCGGGTACGGGCGGGCTTGTAGTGCCTAGGGGAGACTGGAATTCCTGGTGTAAACGGTG  
GAATGTGTAGATATCACGAAGAATCCGATTGCGAAGGCAGCTCACTGGAGCGCAACTGACGCTGAAGCTCGAAAAGTGGC  
GGTAT  
>ASV:3609:Genus:Bacteroides  
TACGGAGGATCCGAGCGTTATCCGATTTATTGGGTTTAAAGGGAGCGTAGGTGGATTGTTAAGTCAGTTGTGAAAAGTTT  
GCGGCTCAACCGTAAAATTGCAGTTGAGACTGGCAGTCTTGTAGTACAGTAGAGGTGGGCGGAATTCCTGGTGTAGAGGTG  
AAATTCGTAGATATTTGTAGGAATGCCGATGGGAAGCCAGCCTACTGGACAGATACTGACGCTAAAGCGCAAAGCGTG  
GGTAG  
>ASV:3610:Genus:Anaerofilum  
AACGTAGGTGGCAAGCGTTGTCCGGAATTACTGGGTGTAAGGGAGCGCAGGCGGAGCTGCAAGTTGGGCGTCAATCTA  
CGGGCTTAACCGTATCCGCGCTCAAAGTGTAGTCTTGTAGTAGTGCAGAGGTAGGCGGAATTCCTGGTGTAGCGGTGG  
AATGCGTAGATATCGGGAGGAACACCAAGTGGCGAAGGCGGCTACTGGGCACCAACTGACGCTGAGGCTCGAAAAGTATGG  
GTAGC  
>ASV:3611:Family:Ruminococcaceae  
TACGGAGGATCCGAGCGTTATCCGATTTATTGGGTTTAAAGGGAGCGTAGATGGATGTTAAGTCAGTTGTGAAAAGTTT  
GCGGCTCAACCGTAAAAGTGCATTTGAAACTGTTATTTCTTGTAGTATCGGAGAGGCAGGCGGAATTCCTAGTGTAGCGGTG  
AAATGCGTAGATATTAGGAGGAACACCAAGTGGCGAAGGCGGCTGCTGGACGACAACGACGCTGAGGCGCAAAGCGTG  
GGGAG  
>ASV:3612:Family:Ruminococcaceae  
TACGTAGGTGGCAAGCGTTGTCCGGAATTACTGGGTGTAAGGGAGCGTAGGCGGGTGTGTAAGTTGAATGTGAAAAGTAA  
TGGGCTCAACCCATAGACTGCGTTCAAAGTGCACATCTTGTAGTGAAGTAGAGGTAGGCGGAATTCCTGGTGTAGCGGTG  
GAATGCGTAGATATCGGGAGGAACACCAAGTGGCGAAGGCGGCTTACTGGGCTTAACTGACGCTGATGCTCGAAAAGCGTG  
GGTAG  
>ASV:3613:Family:Lachnospiraceae  
TACGGAGGATCCGAGCGTTATCCGATTTATTGGGTTTAAAGGGAGCGTAGACGGTTTTGCAAGTCTGAAGTAAAAGCCC  
GGGGCTTAACCCCGGACTGCTTTGAAAAGTGTAGGACTAGAGTGCAGGAGAGGTAAGTGAATTCCTAGTGTAGCGGTG  
AAATGCGTAGATATTAGGAGGAACACCAAGTGGCGAAGGCGGCTTCTGGACTGTAACGACACTGAGGCACGAAAAGCGTG  
GGGAG  
>ASV:3614:Kingdom:Bacteria  
TACGTAGGGAGCGAGCGTTGTCCGGAATTACTGGGTGTAAGGGTGCCTAGGCGGTTTTGGTAAGTCAGAAGTGAAATCCA  
TGGGCTTAACCCATGAAGTGCCTTTGAAACTATCGGACTTGTAGTGAAGTAGAGGTAGGCGGAATTCCTGGTGTAGCGGTG  
GAATGCGTAGATATCGGGAGGAACACCAATGGCGAAGGCGGCTTCTGGGCTTAACTGACGCTGAGGAGCGAAAAGCGTG  
GGGAG  
>ASV:3615:Family:Ruminococcaceae  
TACGTAGGGAGCAAGCGTTGTCCGGAATTACTGGGTGTAAGGGAGCGTAGGCGGGAAGCAAGTTGGAAGTAAAAGACT  
GAGGCTTAACCTCGGAAGTGCCTTTCAAAGTGTCTTTCTTGTAGTGAAGTAGAGGCAGGCGGAATTCCTAGTGTAGCGGTG  
AAATGCGTAGATATTAGGAGGAACACCAAGTGGCGAAGGCGGCTGCTGGGCTTAACTGACGCTGAGGCTCGAAAAGCGTG  
GGTAG  
>ASV:3616:Genus:Ruminiclostridium\_5  
TACGTAGGGAGCAAGCGTTGTCCGATTTACTGGGTGTAAGGGTGCCTAGGCGGTTTTGCAAGTCAAGGAGTGAAATCCA  
TGGGCTTAACCTCATGAAGTGCCTTTGAAAGTGAAGACTTGTAGTGAAGTAGAGGTAGGCGGAATTCCTGGTGTAGCGGTG  
AAATGCGTAGATATCGGGAGGAACACCAAGTGGCGAAGGCGGCTTACTGGGCTTAACTGACGCTGAGGCACGAAAAGCATG  
GGTAG  
>ASV:3617:Class:Bacteroidia  
TACGGAGGATCCGAGCGTTATCCGATTTATTGGGTTTAAAGGGAGCGTAGGCGGATTGTTAAGTCAGTTGTGAAAAGTTT  
GCGGCTCAACCGTAAAATTGCAGTTGAAAGTGGCAGTCTTGTAGTGCCTGAGAGGTAAAGCGGAATTCCTAGTGTAGCGGTG  
AAATGCGTAGAGATTAGGAAGAACACCAAGTGGCGAAGGCGGCTTACTGGACTGTTACTGACACTGAGGCACGAAAAGCGTG  
GGGAG  
>ASV:3618:Genus:Parabacteroides  
TACGGAGGATCCGAGCGTTATCCGATTTATTGGGTTTAAAGGGTGCCTAGGCGGCTTTTAAAGTCAGCGGTGAAAAGTCT  
GTGGCTCAACCATAGAATTGCCGTTGAAAGTGGGGGCTTGTAGTATGTTTGAAGCAGGCGGAATGCGTGGTGTAGCGGTG  
AAATGCTTAGATATCACGAGAAACCCGATTGCGAAGGCAGCTCACTGGAGCGCAACTGACGCTGAAGCTCGAAAAGTGGC  
GGTAT  
>ASV:3619:Family:Lachnospiraceae  
TACGTAGGGGGCAAGCGTTATCCGATTTACTGGGTGTAAGGGAGCGTAGACGGCTGTGCAAGTCTGAAGTAAAAGGCA  
TGGGCTCAACCTGTGGACTGCTTTGAAAAGTGTGCGGCTAGAGTGTGCGGAGAGGTAAGTGAATTCCTAGTGTAGCGGTG  
AAATGCGTAGATATATGGAAGAACACCAAGTGGCGAAGGCGGCTGCTGGGCGCAACTGACGCTCATTCGAAAAGCGTG  
GGGAG

>ASV:3620:Genus:Tyzzerella  
TACGTAGGGGGCAAGCGTTATCCGGAATTACTGGGTGTAAAGGGAGCGTAGGCGGCATGGTAAGCCAGATGTGAAAGCCC  
GAAGCTTAACCTCGAGGATTGCATTTGAACTATCAAGCTAGAGTACAGGAGAGGAAAGCGGAATTCCTAGTGTAGCGGT  
GAAATGCGTAGATATTAGGAAGAACCACAGTGGCGAAGGCGGCTTTCTGGACTGAAACTGACGCTGAGGCACGAAAGCGT  
GGGA

>ASV:3621:Genus:GCA-900066755  
TACGTATGGAGCAAGCGTTATCCGATTTACTGGGTGTAAAGGGAGCGTAGGCGGTTATGCAAGTCAGATGTGAAAGCCC  
GGGGCTTAACCCGGGACTGCATTTGAACTGTGTAAGTGTGCGGAGGTAAGTGAATTCCTAGTGTAGCGGTG  
AAATGCGTAGAGATTAGGAAGAACCACCGGTGGCGAAGGCGACTTTCTGGACGAAAACTGACGCTGAGGCAGAAAGCGTA  
GGAG

>ASV:3622:Kingdom:Bacteria  
TACGGAGGATCCGAGCGTTATCCGATTTATTGGGTTTAAAGGGAGCGTAGGTGGACAGTTAAGTCAGTTGTGAAAGTTT  
GCGGCTCAACCGTAAAATTGCAGTTGAACTGGCAGTCTTGGTGTGAGTAGTGCAGAGGTAGGCGGAATTCCTAGTGTAGCGGTG  
GAATGCGTAGATATCGGAGGAACACCAGTGGCGAAGGCGGCTACTGGCACCAACTGACGCTGAGGCACGAAAGCGTG  
GGAG

>ASV:3623:Family:Ruminococcaceae  
TACGTAGGTGGCAAGCGTTGTCCGGAATTACTGGGTGTAAAGGGAGCGTAGGCGGGAGGCCAAGTCAGCTGTGAAAACCTA  
CAGGCTTAACCTGAGACTGCAGTTGAACTGGTCTTGGTGAAGTAGAGTTGGCGGAATTCCTAGTGTAGCGGTG  
AAATGCGTAGATATTCGGAGGAACACCAGTGGCGAAGGCGGCAACTGGGCTTAACTGACGCTGAGGCTCGAAAGGTG  
GGAG

>ASV:3624:Class:Bacteroidia  
TACGGAGGATCCGAGCGTTATCCGATTTATTGGGTTTAAAGGGAGCGTAGATGGGTTGTTAAGTCAGTTGTGAAAGTTT  
GCGGCTCAACCGTAAAATTGCAGTTGATACTGCGTGTCTTGGTGTGAGTAGAGGTGGCGGAATTCCTAGTGTAGCGGTG  
AAATGCGTAGATATATGAGGAACACCAGTGGCGAAGGCGGCTCTCTGGTCTGTAAGTACGCTGAGGCTCGAAAGCGTG  
GGAG

>ASV:3625:Genus:Eubacterium  
TACGGAGGGTGAAGCGTTATCCGGAATTACTGGGCGTAAAGGGCGCGTAGGCGGTCTATTAAGTCTGATGTGAAAGGTA  
CCGGCTCAACCGTGAAGTGCATTTGAACTGGTGTAGTCTTGGTGAAGTAGAGGCAAGTGAATTCCTAGTGTAGCGGTG  
AAATGCTTAGATATCACGAAGAACCAGTGGCGAAGGCGACTACTAGACTGTTACTGACACTGATGCTCGAAAGGTG  
GGTAT

>ASV:3626:Family:Carnobacteriaceae  
TACGTATGGTGAAGCGTTATCCGATTTACTGGGTGTAAAGGGAGCGCAGGCGGAAGGCTAAGTCTGATGTGAAAGCCC  
CCGGCTCAACCGGGGAGGGTATTGGAACCTGGGAACTTGGTGTGAGTAGAGAGGAGTGAATTCCTAGTGTAGCGGTG  
AAATGCGTAGATATATGAGGAACACCAGTGGCGAAGGCGACTCTCTGGTCTGTAAGTACGCTGAGGCTCGAAAGCGTG  
GGTAG

>ASV:3627:Species:alactolyticus  
TACGTAGGGGACGAGCGTTGTCCGGAATCACTGGGCGTAAAGGGCGCGTAGGCGGTTTTATAAGTCAAGTGTGAAAGGTA  
CCGGCTCAACCGGTGACGTGCATTTGAACTGTAAGACTTGGTGTGAGTAGAGGCAAGCGGAATTCCTAGTGTAGCGGTG  
AAATGCGTAGATATTAGGAAGAACCACCGTGGCGAAGGCGGCTTCTGGCAGATACTGACGCTGAGGTGCGAAAGCGTG  
GGAG

>ASV:3628:Species:rimae  
TACGTAGGGGGCAAGCGTTATCCGATTTACTGGGCGTAAAGCGCTCGTAGGCGGTCTGTTAGGTGCGGAGTTAAATCCG  
GAGGCTCAACCTCCGCCGCTCCCGATACCGGCAGACTTGGTGGTGGTAGGGGAAAGTGAATTCCTAGTGTAGCGGTG  
AATGCGCAGATATTAGGAAGAACCACAGTGGCGAAGGCGGCTTCTGGGCCATAACTGACGCTGAGGAGCGAAAGCTAG  
GGAG

>ASV:3629:Species:tannerae  
TACGGAAGGTCCGGGCGTTATCCGGAATTTATTGGGTTTAAAGGGAGCGCAGGCGGGAGTATAAGTCAAGTGTGAAATATC  
AGAGCCCAACTCTGTTATGCAGTTGAACTATATTTCTTGGTACGCACAGGATGTTGGAATTCAGGTTGTAGCGGTG  
AATGCTTAGATATCCTGAAGAACCAGTCCGATCGGAAGGCGGCTTCTGGGCGCAACTGACGCTGAGGCTCGAAAGTGG  
GTATC

>ASV:3630:Family:Lachnospiraceae  
TACGTAGGGGGCAAGCGTTATCCGATTTACTGGGTGTAAAGGGAGCGTAGACGGGATAGCAAGTCTGAAGTGAAGCCC  
GGGGCTCAACCCGGGACTGCTTTGAACTGTTGACCTGGAGTGTGAGAGGCAAGTGAATTCCTAGTGTAGCGGTG  
AAATGCGCAGATATTGGAAGAACCACCGATGGCGAAGGCGACTTCTGGGCCCACTGACGCTGAGGCGCGAAAGCTAG  
GGAG

>ASV:3631:Genus:Chungangia  
TACGTAGGTGGCAAGCGTTGTCCGATTTATTGGGCGTAAAGCGCGCAGGCGGTCTTTAAGTCTGATGTGAAATCTT  
GCGGCTCAACCGCAAGCGGTATTGGAACCTGGGGACTTGGTGTGAGTAGAGGAAAGCGGAATTCACGTTGTAGCGGTG  
AAATGCGTAGAGATGTGGAGGAATACAGTGGCGAAGGCGGCTTTCTGGTCTGTAAGTACGCTGAGGCGCGAAAGCGTG  
GGAG

>ASV:3632:Family:Lachnospiraceae  
TACGTAGGGGGCAAGCGTTATCCGATTTACTGGGTGTAAAGGGAGCGTAGACGGCGCAGCAAGTCTGATGTGAAAGGCA  
GGGGCTTAACCCCTGGACTGCATTTGAACTGTGCGACTAGAGTGTGCGAGGGTAAGTGAATTCCTAGTGTAGCGGTG  
AAATGCGTAGAGATTAGGAAGAACCACCGTGGCGAAGGCGACTTCTGGACGAAAACTGACGCTGAGGCGCGAAAGCGTG  
GGAG

>ASV:3633:Genus:Libanicoccus  
TACGTATGGGCGAGCGTTATCCGATTTACTGGGCGTAAAGCGCGCGTAGGCGGCTCGTAGGCGGGAGTCAAATCCG  
GGGGCTCAACCCCGCCGCTCCGGAACCTCGAGGCTTGGTCTGGCAGGGGAGGTTGAATTCCTAGTGTAGCGGTG

AATGCGCAGATATTTGGAAGAACACCGGTGGCGAAGGCGGCCCTCTGGGCCACGACTGACGCTGAGGCGCTAAAGCTGGG  
GGAGC  
>ASV:3634:Family:Lachnospiraceae  
TACGTAGGGGGCAAGCGTTATCCGGATTTACTGGGTGTAAGGGAGCGTAGACGGCATGGCAAGCCAGATGTGAAAGCCC  
GGGGCTCAACCCGGGACTGCATTTGAACTGTCAGGCTAGAGTGTCCGGAGAGGAAAGAGGAATTCCTAGTGTAGCGGTG  
AAATGCGTAGATATTAGGAGGAACACCAGTGGCGAAGGCGGCTTTCTGGACGATGACTGACGTTGAGGCTCGAAAGAGTG  
GGGAG  
>ASV:3635:Kingdom:Bacteria  
TACGTAGGGGGCGAGCGTTATCCGGATTTATTGGGCGTAAAGCGTGTGTAGGCGGTTTATTAAGTTAAGATTAAGGCC  
GGGGCTCAACTCCGGTAAGTCTAAAACTGGTAGACTTGAGTACGGTAGAGGCAAACGGAATTCCTAGTGTAGCGGTGA  
AATGCTTAGATATCACGAAGAACTCCGATTGCGAAGGCAGCCTGCTAAGCTGCAACTGACATTGAGGCACGAAAGTGTG  
GTATC  
>ASV:3636:Family:Ruminococcaceae  
TACGTAGGTGGCAAGCGTTGTCCGGATTTACTGGGTGTAAGGGCGTGAAGCGGTTTGAAGTCAGATGTGAAATACC  
GGGGCTTAACCCGGAAGTCAACTGAAACCGTAGATCTTGAGTACTGGAGAGGAAAGTGAATTCCTAGTGTAGCGGTG  
AAATGCATAGAGATTAGGAGGAACACCAGTGGCGAAGGCGACTAACTGGACTGTAACGACGCTGAGGCGCGAAAGTGTG  
GGGAG  
>ASV:3637:Family:Lachnospiraceae  
TACGTAGGGGGCGAGCGTTATCCGGATTTACTGGGTGTAAGGGAGCGTAGACGGCATTGCAAGTCTGAAGTGAAGCCC  
GCGGCTCAACCGCGGAAGTGCATTTGAACTGTAAGGCTGGAGTACC GGAGAGGTAAGCGGAATTCCTAGTGTAGCGGTG  
AAATGCGTAGATATTAGGAGGAACACCAGTGGCGAAGGCGGCTTACTGGACGTTAAGTACGCTTGAAGGCTCGAAAGCGTG  
GGGAG  
>ASV:3638:Genus:Bacteroides  
TACGGAGGATCCGAGCGTTATCCGGATTTATTGGGTTTAAAGGGAGCGTAGGTGGATTGTTAAGTCAGTTGTGAAAGTTT  
GCGGCTCAACCGTAAATGCAAGTGAAGTGGCAGTCTTGGTACAGTAGAGGTGGGCGGAATTCCTAGTGTAGCGGTG  
AAATGCTTAGAGATGGGAGGAACACCAGTGGCGAAGGCGGCTTCTGGGCTTTACTGACGCTGAGGCTCGAAAGCGTG  
GGGAG  
>ASV:3639:Family:Bifidobacteriaceae  
TACGTAGGGGGCAAGCGTTATCCGGATTTACTGGGTGTAAGGGCTCGTAGGCGGTTCTGCGCTCCGGTGTGAAAGTCC  
ATCGCTTAACCGTGGATCCGCGCCGGGTACGGGCGGGCTTGGTGGTAGGAGGACTGGAATTCCTAGTGTAGCGGTG  
GAATGCGTAGATATCCGGAGGAACACCAGTGGCGAAGGCGGCTTACTGGGCAACACTGACGCTGAGGCTCGAAAGTGTG  
GGTAG  
>ASV:3640:Family:Ruminococcaceae  
TACGTATGGTGAAGCGTTATCCGGAATTACTGGGTGTAAGGGAGCGCAGGCGGACCGGCAAGTTGGAAGTGAAGTAACTA  
TGGGCTCAACCCATAAATTGCTTTCAAAGTGTCTTCTTGGTGGTAGTGCAGAGGTAGGCGGAATTCCTAGTGTAGCGGTG  
AAATGCGTAGATATTAGGAGGAACACCAGTGGCGAAGGCGGCTTACTGGACAGTAACTGACGTTGAGGCTCGAAAGCGTG  
GGGAG  
>ASV:3641:Genus:Ruminococcaceae\_UCG-004  
TACGTAGGGAGCGAGCGTTATCCGGATTTACTGGGTGTAAGGGCGTGTAGGCGGGGAAGCAAGTCAGATGTGAAAACCA  
GTGGCTCAACCCACTGGCCTGCATTTGAACTGTTTTCTTGGTGGTAGGAGAGGCGGCGGAATTCCTAGTGTAGCGGTG  
AAATGCGTAGATATACGGAGGAACACCAGTGGCGAAGGCGGCTTCTGGACATTAAGTACGCTGAGGCGCGAAAGCGTG  
GGGAG  
>ASV:3642:Genus:Marvinbryantia  
TACGTAGGGGGCAAGCGTTATCCGGATTTACTGGGTGTAAGGGAGCGTAGACGGCAAGGCAAGTCTGATGTGAAAGGCT  
GGGGCTCAACCCGGGACTGCATTGAAACTGTCTGCTAGAGTGCAGAGGTAAGCGGAATTCCTAGTGTAGCGGTG  
AAATGCGTAGATATTAGGAGGAACACCAGTGGCGAAGGCGGCTTACTGGACGTTAAGTACGCTGAGGCTCGAAAGCGTG  
GGGAG  
>ASV:3643:Genus:Angelakisella  
AACGTAGGTCACAAGCGTTGTCCGGAATTACTGGGTGTAAGGGAGCGTAGGCGGGAAGGCAAGTTGGATGTGAAAAGTGT  
TGGGCTCAACCGACAGACTGCATTCAAAAGTGTCTTCTTGGTGGTAGAGGAAAGCGGAATTCCTAGTGTAGCGGTG  
AAATGCGTAGATATTAGGAGGAACACAGTGGCGAAGGCGGCTTCTGGACTGTAAGTACGCTGAGGAAACGAAAGTGTG  
GGAGC  
>ASV:3644:Family:Ruminococcaceae  
TACGTAGGTGGCAAGCGTTGTCCGGATTTACTGGGTGTAAGGGCGCGTAGGCGGTTCTGCAAGTCAAGTGTGAAATGCC  
GGGGCTTAACCCGGAAGTGCATCTGAAACTGTGGATCTTGGTACTGGAGAGGAAAGTGAATTCCTAGTGTAGCGGTG  
AAATGCGTAGATATTAGGAGGAACACCAGTGGCGAAGGCGGCTTTCTGGACAGAACTGACGCTGAGGCGCGAAAGCGTG  
GGGAG  
>ASV:3645:Genus:Gordonibacter  
TACGTAGGGGGCGAGCGTTATCCGGATTTCTGGGCGTAAAGCGCGCTAGGCGGCCCTCAAGCGGAACCTTAACCCG  
AGGGCTCAACCCCGGCGGTTCCGAACTGGCAGGCTCGAGTTTGGTAGAGGAAAGTGAATTCCTAGTGTAGCGGTG  
AATGCGCAGATATCGGAAGAAACACCAGTGGCGAAGGCGACTTCTGGGCCATCAACTGACGCTGAGGCGCGAAAGCTGG  
GGGAG  
>ASV:3646:Order:Mollicutes\_RF39  
AACGTAGGTCACAAGCGTTGTCCGGAATTACTGGGTGTAAGGGAGCGCAGGCGGTTTATTAGTCTATGGTTAATTCC  
GAAGCTTAACCTCGTTCGCCACAGAAACCGATTTACTTGGTATGGTAGAGGCAAGTGAATTCCTAGTGTAGCGGTAA  
AATGCGTAGATATTAGGAGGAACACCAGTGGCGAAGGCGACTTCTGGGCCATCAACTGACGCTGAGGCGCGAAAGCGTG  
GGAGC  
>ASV:3647:Genus:Alistipes

TACGGAGGATTCAAGCGTTATCCGGATTTATTGGGTTAAAGGGTGCCTAGGCGGTTTAGTAAGTCAGCGGTGAAATTTT  
GGTGCTTAACACCAACGTCGGCTGATACTGCTGGCTAGAGAGTAGTTGCGGTAGCGGAATGTATGGTGTAGCGGTG  
AATGCTTAGATATCACGAAGAACCAGTTCGGAAGGCAGCTTACTGGACGATTACTGACGCTGAGGCTCGAAAGCGTG  
GGGAG

>ASV:3648:Family:Ruminococcaceae

AACGTAGGTCAACAGCGTTGTCCGGATTTACTGGGTGTAAGGGGCGCTAGGCGGACTGTCAAGTCAGTCTGAAATACC  
GGGGCTTAACCCGGGGCTGCGATTGAAACTGACAGCCTTAGTATCGGAGAGGAAAGCGGAATTCCTAGCGTAGCGGTG  
AATGCTTAGATATCACGAAGAACCAGTTCGGAAGGCAGCTGCTAAGCTGCAACTAACATTGAGGCTCGAAAGTGTG  
GGTAT

>ASV:3649:Family:Lachnospiraceae

TACGTAGGGGGCAAGCGTTATCCGGATTTACTGGGTGTAAGGGGAGTGTAGGCGGCGATGCAAGTCAGAAGTAAAAGCCC  
AGGGCTTAACCGTGGGACTGCTTTTGAAGCTGTTGCTGGATTGCCGGAGAGGTAAGTGAATTCCTAGTGTAGCGGTG  
AATGCGTAGATATTAGGAGGAACACCAGTGGCGAAGGCGGCTTACTGGACGGTGAATGACGCTGAGGCTCGAAAGCGTG  
GGGAG

>ASV:3650:Genus:Lachnospiraceae\_UCG-010

TACGTAGGGGGCAAGCGTTATCCGGAATTACTGGGTGTAAGGGGAGAGTAGGCGGCATGGTAAGCCAGATGTAAAAGCCC  
GAGGCTTAACCTCGGGATTGCAATTTGAACTATCAAGCTAGAGTACAGGAGAGGAAAGCGGAATTCCTAGTGTAGCGGTG  
AATGCGTAGATATTAGGAGGAACACCAGTGGCGAAGGCGGCTTTCTGGACTGAAACTGACGCTGAGGCTCGAAAGCGTG  
GGGAG

>ASV:3651:Genus:Family\_XIII\_UCG-001

TACGTAGGGGGCAAGCGTTGTCCGGAATTATTGGGCGTAAAGAGTACTTAGGCGGTCTGGTAAGCGCAAGGTAAAAGGCA  
TAGGCTCAACCAATGTACGCTTTCGAACTGTCAAGCTTAGAGTACAGGAGAGGAAAGTGAATTCCTAGTGTAGCGGTG  
AATGCGTAGATATTAGGAGGAACACCAGTGGCGAAGGCGACTTTCTGGACTGAACTGACGCTGAGGTACGAAAGCGTGG  
GGAGC

>ASV:3652:Family:Lachnospiraceae

TACGTAGGTGGCAAGCGTTGTCCGGATTTACTGGGTGTAAGGGGAGCGTAGACGGCGAAGCAAGTCTGAAGTAAAAGCCC  
GGGCTCAACCCGGGACTGCTTTGAAACTGTTTGTAGAGTGTCTGGAGAGGTAAGTGAATTCCTAGTGTAGCGGTG  
AATGCATAGATATCACGAAGAACCAGTTCGCGAAGGCATTGTGCCGGGCGCACTGACGCTGAGGCTCGAAAGTGGC  
GTATC

>ASV:3653:Species:massiliensis/urinimassiliensis

TACGTAGGGGGCGAGCGTTGTCCGGAATTACTGGGCGTAAAGGGTTCGACGGCGCATGGCAAGTCCGATGTAAAAGGCG  
AAGGCTCAACCTTCGTAAGCATCGAAACTGTCAAGCTTAGAGTGAAGGAGAGGCAAGTGAATTCCTAGTGTAGCGGTG  
AATGCGTAGATATTAGGAGGAATACCAGTGGCGAAGGCGACTTCTGGACTTCAACTGACGCTGAGGAACGAAAGCGTGG  
GTAGC

>ASV:3654:Order:Clostridiales

TACGTAGGGAGCAAGCGTTGTCCGGAATTACTGGGCGTAAAGGGTGCCTAGGCGGTTTGTCAAGTCAAGTGTAAAATACC  
GGGGCTCAACCCGGGACTGCTTTGAAACTGCGAGCTTAGAGTGCAGGAGAGGAAAGCGGAATTCCTAGTGTAGCGGTG  
AAATGCGTAGATATTAGGAGGAACACCAGTGGCGAAGGCGGCTTCTGGACGAACTGACGCTGAGGCGCAAGGCGGTG  
GGGAG

>ASV:3655:Family:Muribaculaceae

TACGGAGGATGCGAGCGTTATCCGGATTTATTGGGTTAAAGGGTGCCTAGGCGGCGTGCACAGTCAAGTCAAGTGTAAAATTC  
GGGGCTCAACCCGAAAGCGTTGAAACTGGCGCGCTCGAGTGGGCGAGAAGTATGCGGAATGCGTGGTGTAGCGGTGA  
AATGCATAGATATCACGCAAGAACCCGATTGCGAAGGCGAGCATACCAGGCGCCCACTGACGCTGAGGCGCAAGGCGGTG  
GGATC

>ASV:3656:Family:Lachnospiraceae

TACGTAGGTGGCAAGCGTTATCCGGAATTACTGGGTGTAAGGGGAGCGTAGGCGGCGATGCAAGTCAAGTGTAAAATTC  
GGGGCTTAACCCGAAAGCTGATTTGAAACTGTATGCTTAGAGTGCAGGAGAGGTAATGGAATTCCTAGTGTAGCGGTG  
AAATGCGTAGATATTAGGAGGAACACCAGTGGCGAAGGCGATTACTGGACGTAAGTCAAGTGTAGGCTCGAAAGCGTG  
GGGAG

>ASV:3657:Genus:Lachnoclostridium

TACGTAGGGGGCAAGCGTTATCCGGATTTACTGGGTGTAAGGGGAGCGAGACGGCAAGTCTGAAGTAAAAGCCC  
AGGGCTCAACCCGGGACTGCTTTGAAACTGTAGAGCTAGAGTGTGGAGAGGCAAGCGGAATTCCTAGTGTAGCGGTG  
AAATGCGTAGATATTAGGAGGAACACCAGTGGCGAAGGCGGCTTCTGGACGTAAGTCAAGTGTAGGCTCGAAAGCGTG  
GGGAG

>ASV:3658:Family:Lachnospiraceae

TACGTAGGGGGCAAGCGTTATCCGGATTTACTGGGTGTAAGGGTGCCTAGGTTGCAAGGCAAGTCAAGTGTAAAAGCCC  
GGGGCTCAACCCGGTACTGCTTTGAAACTGTCTAGCTAGAGTGCAGGAGAGGTAAGCGGAATTCCTAGTGTAGCGGTG  
AAATGCGTAGATATTAGGAGGAACACCAGTGGCGAAGGCGGCTTACTGGCACCAACTGACGCTGAGGCTCGAAAGTGTG  
GGTAG

>ASV:3659:Family:Ruminococcaceae

TACGGAGGATCCGAGCGTTATCCGGATTTACTGGGTGTAAGGGTGCCTAGGCGGAAAGCAAGTCAAGTGTAAAATACC  
GGGGCTCAACTCCGGGCTGCGCTTGAAGCTGTTTTCTTAGTGAAGTAGAGGCAAGCGGAATTCCTAGTGTAGCGGTG  
GAATGCGTAGATATTAGGAGGAACACCAGTGGCGAAGGCGGCTTCTGGCTTTAACTGACGCTGAAGCACGAAAGCATG  
GGTAG

>ASV:3660:Family:Lachnospiraceae

TACGTAGGGAGCAAGCGTTGTCCGGAATTACTGGGTGTAAGGGTGCCTAGGCGGTTATGCAAGTCATATGTAAAATACC  
GGGGCTCAACTCCGGGCTGCATAAGAACTGTATATCTTAGAGTGCAGGAGAGGTAAGCGGAATTCCTAGTGTAGCGGTG  
AAATGCGTAGATATTAGGAGGAACACCAGTGGCGAAGGCGGCTTACTGGACTGAAACTGACGCTGAGGCGCAAGGCGGTG

GGGAG

>ASV:3661:Genus:Lachnospiraceae\_UCG-010

TACGTAGGTGGCAAGCGTTATCCGGAATTAAGGGAGCGTAGGCGGCACGCCAAGCCAGATGTGAAAGCCC  
GAGGCTTAACCTCGTGGATTGCATTTGGAACCTGGCGAGCTAGAGTACAGGAGAGGAAAGCGGAATTCCTAGTGTAGCGGT  
GGAATGCGTAGATATCGGGAGGAACACCAGTGGCGAAGGCGGCTACTGGGCACCAACTGACGCTGAGGCTCGAAAGTGT  
GGTA

>ASV:3662:Genus:Bacteroides

TACGGAGGATCCGAGCGTTATCCGGAATTAAGGGAGCGTAGGTTGACAGTTAAGTCAGTTGTGAAAGTTT  
GCGGCTCAACCGTAAATTCAGTTGATACTGGATGTCTTGGAGTGCAGTTGAGGCAGGCGGAATTCGTGGTGTAGCGGTG  
AAATGCTTAGATATCGAGAGGAACACTCGTGGCGAAGGCGGTTCTGGACATTAAGTACGCTGAGGCACGAAGGCCAG  
GGGAG

>ASV:3663:Genus:GCA-900066755

TACGGAGGGGGCAAGCGTTATCCGGAATTAAGGGAGCGTAGACGGAGCAGCAAGTCTGATGTGAAAACCC  
GGGGCTCAACCCGGGACTGCATTGAAACTGTTGATCTGGAGTGCCGGAGAGGTAAGCGGAATTCCTAGTGTAGCGGTG  
AAATGCATAGATATCACGAGAACCCGATTGCGAAGGCAGCTGCTAGGGTAAACAGACGCTGAGGCACGAAGCGTG  
GGTAT

>ASV:3664:Genus:Clostridium\_sensu\_stricto\_4

TACGTAGGGAGCAAGCGTTATCCGGAATTAAGGGAGCGTAGGCGGACTTTTATGTGAGATGTGAAATACC  
CGGGCTCAACTGGGTGCTGCATTTCAAAGTCTAGAGTGCAGTAAAGGTGGGCGGAATTCGTGGTGTAGCGGTG  
AAATGCTTAGATATCACGAAGAACTCCGATTGCGAAGGCAGCTTACTAACCTGTAACGACATTGATGCTCGAAAGTGTG  
GGTAT

>ASV:3665:Family:Pasteurellaceae

TCCTTCTTTTTCTCTTTCTCTTCTCCCTCGGCGTAAAGGGCACGCAGGCGGTGACTTAAGTGAGTGTGAAAGCCC  
CGGGCTTAACCTGGGAATTGCATTTCACTAGGGTCTAGAGTACTTTAGGGAGGGGTAGAATTCACGCTGTAGCGGTG  
AAATGCGTAGAGATGTGGAGGAAGACCGAAGGCGAAGGCAGCCCTTGGGAATGTACTGACGCTCATGTGCGAAAGCGTG  
GGGAG

>ASV:3666:Family:Ruminococcaceae

TACGTATGGTCAAGCGTTATCCGGAATTAAGGGAGCGTAGGCGGGGAGAACAAGTTGGAAGTGAATCCA  
TGGGCTCAACCCATGAAGTCTTTCAAAGTCTTTTCTTGGAGTGCAGAGGTAGGCGGAATTCGCGGTGTAGCGGTG  
GAATGCGTAGATATCAGGAGGAACATCAGTGGCGAAGGCGGCTTACTGGGCTTAACTGACGCTGAGGCTCGAAAGCGTG  
GGGAG

>ASV:3667:Family:Ruminococcaceae

TACGTAGGTGGCAAGCGTTATCCGGAATTAAGGGAGCGTAGGCGGGAATGCAAGTCAAGTGTGAAATCCA  
TGGGCTTAACCCATGAAGTCTTTCAAAGTCTTTTCTTGGAGTGCAGAGGTAGGCGGAATTCGAGTTCCTAGTGTAGCGGTG  
AAATGCGTAGATATTAGGAAGAACTCCGATTGCGAAGGCAGCTGCTAAGCTGCAACTGACATTGAGGCTCGAAAGTGTG  
GGTAT

>ASV:3668:Genus:Anaerotruncus

TACGTAGGGAGCGAGCGTTATCCGGAATTAAGGGAGCGTAGGCGGGATGCCAAGTAGAATGTTAAATCCA  
TCGGCTCAACTGGTGGCAGCGTTCTAAAGTGGCGTTCTTGGAGTGCAGAGGTAGGCGGGAATTCCTAGTGTAGCGGTGA  
AATGCTTAGAGATCATACAGAAGTCCGATTGCGAAGGCAGCTTACTAAACCTAACTGACACTGAAGCACGAAAGCGTGG  
GGATC

>ASV:3669:Genus:Gemmatirosa

TACAGAGGGTGCAGCGTTATCCGGAATTAAGGGAGCGTAGGCGGGGTCACGCGTCCGTGAAAGCCC  
GGGGCTCAACCCGGGTGCGCGGTGCAAGCGGCTGCTGGAGCGTACGAGAGGCAGGCGGAATTCGCGGGGTAGCGGTG  
GAATGCGTAGAGATCCGGAAGAACACCGTGGCGAAGGCGGCTGCTGGCGTACGGTGACGCTGAGGCAGCAGCGGTG  
GGGAG

>ASV:3670:Family:Ruminococcaceae

TACGTAGGTGGCAAGCGTTATCCGGAATTAAGGGAGCGTAGGCGGGAAGGCAAGTTGATTGTCTAAACTA  
TCGGCTCAACTGATAGTTCGATCAAAACTACTTTTCTTGGAGTGAAGTAGAGGTAAGCGGAATTCCTAGTGTAGCGGTGA  
AATGCGTAAATATTAGGAGGAACACCAGTGGCGAAGGCGGCTTACTGGGCTTAACTGACGCTGAGGCTCGAAAGCGTGG  
GTAGC

>ASV:3671:Family:Lachnospiraceae

TACGTAGGGGGCAAGCGTTATCCGGAATTAAGGGAGCGTAGACGGACTGGCAAGTCTGATGTGAAAGGCG  
GGGGCTCAACCCCTGGACTGCATTGAAACTGTTAGTCTTGGAGTGCAGGAGAGGTAAGCGGAATTCCTAGTGTAGCGGTG  
AAATGCGTAGATATTAGGAAGAACCCGATGGCGAAGGCAGCTCTCTGGGACATGACTGACGCTCATGCACGAAAGCGTG  
GGGAG

>ASV:3672:Genus:Anaerostipes

AACGTAGGTCAAGCGTTATCCGGAATTAAGGGAGCGTAGGTTGATGGCAAGTCAAGTGAAGTGAAGCCC  
AGGGCTTAACCTGGGACTGCTTTTGAAGTGTGAGACTGGAGTGCAGGAGAGGTAAGCGGAATTCCTAGTGTAGCGGTG  
AAATGCGTAGATATTAGGAGGAACATCAGTGGCGAAGGCGGCTACTGGGCACCAACTGACGCTGAGGCTCGAAAGTGTG  
GGTAG

>ASV:3673:Species:ureolyticus

TACGGGGGGTCAAGCGTTACTCGGAATTAAGGGAGCGTAGGCGGATTATCAAGTCTTTTGTGAAATCTA  
GTGGCTTAACCTAAACTGCTTAGGAAACTGATAGTCTAGAGTGGGGAGAGGTAGATGGAATTCCTGGTGTAGGGGTG  
AAATCCGTAGAGATCAAGAAGAATACCCATTGCGAAAGCGATCTGCTGGAACCTAACTGACGCTGAGGCGTGAAGCGGTG  
GGTAG

>ASV:3674:Order:Lactobacillales

TACGTAGGTGGCAAGCGTTATCCGGAATTAAGGGAGCGTAGGCGGTTTGGTAAAGTCTGAAGTAAAGGCT

GTGGCTCAACCATAGTTCGCTTTGAAACTGTCAAACCTTGTGAGTGCAGAAGGGGAGAGTGAATCCCTAGTGTAGCGGTGA  
AATGCTTAGATATCACGAAGAAGCTCCGATTGCGAAGGCAGCTGCTAAGCTGCAACTGACATTGAGGCTCGAAAGTGTGG  
GTATC

>ASV:3675:Genus:Negativibacillus

TACGTAGGTGGCAAGCGTTGTCCGGAATTACTGGGTGTAAGGGGAGCGTAGGCGGGGAGACAAGTTGAATGTCTAAACTA  
TCGGCTTAACCTGATAGTCGCGTTCAAACCTATCACTCTTGTGAGTGCAGTTGAGGCAGGCGGAATTCGTGGTGTAGCGGTGA  
AATGCTTAGATATCACGAAGTACTCCGATTGCGAAGGCAGCTGCTAAGCTGCAACTGACATTGAGGCTCGAAAGTGTGG  
GTATC

>ASV:3676:Genus:Shuttleworthia

TACGTATGGAGCAAGCGTTATCCGGATTTACTGGGTGTAAGGGGAGTGTAGGCGGCATGGCAAGTCTGATGTGAAAATCC  
GGGGCTTAACCCGGACCTGCATTGGAACCTGTCAAGCTGGAGTGTGGAGAGGTAAGTGAATTCCTAGTGTAGCGGTG  
AAATGCGTAGATATTAGGAGGAACACCAAGTGGCGAAGGCGGCTTACTGGGCGACAACGACGCTGAGGCTCGAAAGCGTG  
GGGAG

>ASV:3677:Genus:Ruminiclostridium\_5

TACGTAGGGAGCAAGCGTTGTCCGGAATTTATTGGGTTAAAGGGGAGCGTAGACGGTGTGGCAAGTCTGATGTGAAAACCA  
TGGGCTCAACCTGTGGACTGCGTTTGAACCTGTTTACTTGTGAGTGAAGTAGAGGTAGGCGGAATTCCTGGTGTAGCGGTG  
AAATGCGTAGAGATCGGGAGGAACACCAAGTGGCGAAGGCGGCTTACTGGGCTTAACTGACGCTGAGGCACGAAAGCATG  
GGTAG

>ASV:3678:Genus:Alistipes

TACGGAGGATCAAGCGTTATCCGGATTTATTGGGTTAAAGGGTGCCTAGGCGAGTTTGATAAGTTAGAGGTGAAATACC  
GGGGCTCAACCTCCGGAAGTGCCTCTAATACTGTTGAACTAGAGAGTAGTTGCGGTAGGCGGAATGTATGGTGTAGCGGTG  
AAATGCTTAGATATCACGAAGAAGCTCCGATTGCGAAGGCAGCTCACTGGAGTGAACGACGCTGATGCTCGAAAGTGTG  
GGTAT

>ASV:3679:Family:Lachnospiraceae

TACGTAGGGGGCAAGCGTTATCCGGATTTACTGGGTGTAAGGGGAGCGTAGACGGTGTGGCAAGTCTGATGTGAAAGGCA  
TGGGCTCAACCTGTGGACTGCATTGGAACCTGCATACCTGAGTGCCGGAGGGGTAAGCGGAATTCCTAGTGTAGCGGTG  
AAATGCTTAGATATCACGAAGAAGCTCCGATTGCGAAGGCAGCTCACTAGACTGTTACTGACACTGATGCTCGAAAGTGTG  
GGTAT

>ASV:3680:Species:parvum

TACGTAGGGGGCAAGCGTTATCCGGATTTACTGGGTGTAAGGGGAGCGTAGACGGAATGGCAAGTCTGAAGTGA AAAACCC  
CGGGCTCAACCTGGGGACTGCTTTGAAACTGTTGTTCTAGAGTGTGGAGAGGTAAGTGAATTCCTGGTGTAGCGGTG  
AAATGCGTAGATATCAGGAAGAACACCGGAGGCGAAGGCGGCTTACTGGACAATAACGACGTTGAGGCTCGAAAGCGTG  
GGGAT

>ASV:3681:Genus:Lachnoclostridium

TACGTAGGGGGCAAGCGTTATCCGGATTTACTGGGTGTAAGGGGAGCGTAGACGGTGTGCAAGTTTGAAGTGAAGGCC  
GGGGCTCAACCGCGGACTGCTTTGAAACTGTGCAGCTAGAGTGTGGAGAGGTAAGTGAATTCCTAGTGTAGCGGTG  
AAATGCGTAGATATTAGGAGGAACACCAAGTGGCGAAGGCGGCTTACTGGACGATGACTGACGTTGAGGCTCGAAAGCGTG  
GGGAG

>ASV:3682:Genus:Ruminiclostridium\_9

TACGTAGGTGGCAAGCGTTATCCGGATTTACTGGGTGTAAGGGGCGTGTAGGCGGGGAGCAAGTGCAGCTGAAATCC  
AGGGCTCAACCTGGAAGTGCCTTTGAAACTGTTCTTCTTGTGAGTGTGGAGAGGCAAGTGAATTCCTGGTGTAGCGGTG  
AAATGCGTAGATATCAGGAGGAACACCAAGTGGCGAAGGCGGCTGCTGGACATTAACGACGCTGAGGCGGAAAGCGTG  
GGGAG

>ASV:3683:Kingdom:Bacteria

TACGGAGGGTGAAGCGTTAATCGGAATTACTGGGCGTAAAGCGCGCTAGGTTGTTTTGTAAGTGCAGAGGTGTAATCCC  
ACGGCTTAACCGTGAAGTGCCTTTGATACTGCATAACTGGATCCGGGAGAGGACAGCGGAATTCAGGTGTAGGAGTG  
AAATGCGTAGATATCACGAAGAAGCTCCGATTGCGAAGGCAGCTCACTAGACTGTCACTGACACTGATGCTCGAAAGTGTG  
GGTAT

>ASV:3684:Genus:Christensenellaceae\_R-7\_group

TACGTAGGGGGCGAGCGTTGTCCGGAATGACTGGGCGTAAAGGGGCGTGTAGGCGGCTTTTTAAGTCTGGAGTGAAGGCC  
CTTTTTCAAGGAGGGGAGTGCCTTTGGAGACTGGAGAGCTTGTGAGTGCAGGAGAGGTAAGTGAATTCCTAGTGTAGCGGTG  
AAATGCGTAGAGATTGGGAGGAACACCAAGTGGCGAAGGCGACTTGTGGGCCGTAACGACGCTGAGGCGGAAAGCGTG  
GGGAG

>ASV:3685:Family:Clostridiales\_vadinBB60\_group

TACGTAGGATGAAGCGTTATCCGGAATGACTGGGCGTAAAGGGTGCCTAGGCGGTAATCAAGTTGGCAGCGTAATCCC  
GGGGCTTAACCGCGGAAGTACTGCCAAAACCTGGTGAAGTGTGTCAGGGGTAAGTGAATTCCTAGTGTAGCGGTG  
GAATGCGTAGATATTAGGAGGAACACCGGAGGCGAAAGCGACTTACTGGGGCATAACTGACGCTGAGGCGGAAAGCGTG  
GGGAG

>ASV:3686:Species:concisus

TACGGAGGGTGAAGCGTTACTCGGAATCACTGGGCGTAAAGGAGCGCTAGGCGGATTATCAAGTCTCTTGTGAAATCCT  
ATGGCTTAACCATAGAACTGCTTGGGAACTGATAACTGAGTGTAGGAGAGGAGGATGGAATTCCTAGTGTAGCGGTG  
AAATCCGTAGAGATCACGAGGAATACCAATTGCGAAGGCGACTTGTGGAACCTCAACTGACGCTAATGCGTGAAGCGTG  
GGGAG

>ASV:3687:Genus:Desulfovibrio

TACGGAGGGTGAAGCGTTAATCGGAATTTACTGGGCGTAAAGCGCTCGTAGGCTGTTGTGTAAGTCAAGGGTGAATCCC  
ACGGCTCAACCGTGAAGTGCCTTTGATACTGCGTACTCGAGTCCGGGAGAGGATGGCGGAATTCAGGTGTAGGAGTG  
AAATCCGTAGATATCTGGAGGAACATCAGTGGCGAAGGCGGCTTACTGGACCGTACTGACGCTGAGGAGCGAAAGCGTG  
GGGAG



>ASV:3688:Kingdom:Bacteria  
TACGGAGGATCCGGGCGTTATCCGGATTTATTGGGTTAAAGGGAGCGTAGGTGGACATGTAAGTCAGTTGTGAAAGTTT  
GCGGCTCAACCGTAAATTGCAGTTGATACTGTGTCTTGAGTACAGTAGAGGTGGCGGAATCCAGGTGTAGCGGTG  
AAATGCGTAGATATCGGAGGAATACCGGTGGCGAAGGCGGCCCTGGACGAAGACTGACGCTCAGGTGCGAAAGCGTG  
GGGAG

>ASV:3689:Family:Ruminococcaceae  
TACGTAGGTGGCAAGCGTTGTCCGGATTTACTGGGTGTAAGGGCGGTAGGCGGAGATGCAAGTTAGGAGTAAATCTA  
TGGGCTCAACCCATAAACTGCAGTTGAACTGTTATCTTGAGTGGAGTAGAGGCAAGCGGAATCCAGGTGTAGCGGTG  
AAATGCGTAGATATTCGGAGGAACACCACTGGCGAAGGCGGCTTGTGGCTCTAACTGACGCTGAGGCTCGAAAGTGTG  
GGGAG

>ASV:3690:Genus:Lachnospiraceae\_UCG-010  
TACGTAGGGGGCAAGCGTTATCCGGATTTACTGGGTGTAAGGGAGCGTAGGTGGCATGGTAAGTAAGATGTGAAAGCCC  
GAGGCTTAACCTCGAGGATTCGATTTTAAACTATCAAGCTAGAGTACAGGAGAGGAAAGCGGAATCCCTAGTGTAGCGGT  
GAAATGCGTAGATATTAGGAAGAACCACAGTGGCGAAGGCGGCTTCTGGACTGAACTGACGCTGAGGCTCGAAAGCGT  
GGGA

>ASV:3691:Family:Clostridiales\_vadinBB60\_group  
TACGTAGGTGGCAAGCGTTGTCCGGATGACTGGGCGTAAAGGGAGCGTAGGCGGCGCAACAAGTTAGGAGTAAATCCC  
GGGCTTAACCCGGAACTGCATTTGAACTGTTGTCTGAGTGGAGAGGAAAGCGGAATCCCTAGTGTAGCGGTG  
GAATGCGTAGATATTAGGAGGAACACCAGAGGCGAAGGCGGCTTCTGGACTTAAGTACGCTGAGGCTCGAAAGCGTG  
GGGAG

>ASV:3692:Family:Lachnospiraceae  
TACGTAGGGGGCAAGCGTTATCCGGATTTACTGGGTGTAAGGGAGCGTAGACGGATGGACAAGTCTGATGTGAAAGGCT  
GGGCTCAACCCGGAACTGCATTTGAACTGCTCGCTAGAGTACAGGAGAGGCGAGCGGAATCCCTAGTGTAGCGGTG  
AAATGCTTAGATATCACGAAGAACCAGTGGCGAAGGCGAGCTTGTGGACTGTAAGTACGCTGATGCTCGAAAGTGTG  
GGTAT

>ASV:3693:Species:visericola  
TACGGAGGATGCGAGCGTTATCCGGATTTATTGGGTTAAAGGGTGCCTAGGCGGCACGCCAAGTCAGCGGTGAAATGCC  
CGGGCTTAACCCGGGAGGCTGCGTTGAACTGGCGAGCTAGCGTGCACAAGAGGCGAGCGGAATGCGTGGTGTAGCGGTG  
AAATGCATAGATATCACGCAGAACCCGATTGCGAAGGCGAGCTTGTGGTCTGTAAGTACGCTGAGGCTCGAAAGCGTG  
GGAT

>ASV:3694:Species:elegans  
TACGTAGGTGGCAAGCGTTGTCCGGATTTATTGGGCGTAAAGCGAGCGAGGCGGTCATTAAGTCTGATGTGAAAGCCC  
CCGGCTCAACCCGGGAGGTTGATTGAAACTGGTTGACTTGGAGTGCAGAAGAGGAGAGTGGAAATCCATGTGTAGCGGTG  
AAATGCGTAGATATTAGGAGGAACACCAGTGGCGAAGGCGACTCTCTGGTCTGTAAGTACGCTGAGGCTCGAAAGCGTG  
GGTAG

>ASV:3695:Family:Lachnospiraceae  
TACGTAGGGGGCAAGCGTTATCCGGATTTACTGGGTGTAAGGGAGCGTAGACGGTGTGACAAGTCTGATGTGAAAGGCA  
TGGGCTCAACCTGTGGACTGCATTGAAACTGTCATACTTGGAGTGCAGGAGGGTAAGCGGAATCCCTAGCTGAGCGGTG  
AAATGCTTAGATATCACACAGAACCAGTGGCGAAGGCGAGCTTCCAAGCTATTACTGACGCTGAGGCGCAAAAGCGTG  
GGGAG

>ASV:3696:Family:Lachnospiraceae  
TACGGAGGATCAAGCGTTATCCGGATTTATTGGGTTAAAGGGAGCGTAGGCGGACTATTAAGTCAGTGTGAAAGGCA  
TGGGCTCAACCTGTGGACTGCATTGAAACTGTCATACTTGGAGTGCAGGAGGGTAAGCGGAATCCCTAGTGTAGCGGTG  
AAATGCGTAGATATTAGGAGGAACACCAGTGGCGAAGGCGGATAACTGGACGGCAACTGACGCTGAGGCGCAAAAGCGTG  
GGGAG

>ASV:3697:Order:Clostridiales  
TACGTAGGGGGCGAGCGTTGTCCGGATTTACTGGGCTAAAGGGCGCGTAGGCGGCTAGTAAGTCAGTGTGAAAAGTG  
AGGGCTCAACCTTAGAGTGCATCTGATACTGCTAGGCTTGGAGTACAGAAGAGGAAAGCGGAATCCCTAGTGTAGCGGTG  
AAATGCGTAGATATTAGGAGGAACACCAGTGGCGAAGGCGGATTGCTGGACAGCAACTGACGCTGAGGCGCAAAAGTGTG  
GGGAG

>ASV:3698:Family:Lachnospiraceae  
TACGTAGGTGGCAAGCGTTGTCCGGATTTACTGGGTGTAAGGGAGCGTAGACGGCGCAGCAAGTCTGATGTGAAAGGCA  
GGGGCTTAACCCCTGGACTGCATTGAAACTGCTGTGCTTGGAGTGCAGGAGGGTAAGCGGAATCCAGTGTAGCGGTG  
AAATGCGTAGATATGCGGAAGAACCACCAATGGCGAAGGCGAGCCTCTGGGACATGACTGACGCTCATGCACGAAAGCGTG  
GGGAG

>ASV:3699:Genus:Ruminococcaceae\_UCG-013  
TACGTAGGTGGCAAGCGTTATCCGGATTTACTGGGTGTAAGGGCGCGTAGGCGGACTGTCAAGTCAGTGTGAAATACC  
GGGGCTTAACCCGGGCTGCGATTGAACTGACAGCCTTGGAGTATCGGAGAGGAAAGCGGAATCCCTAGTGCAGCGGTG  
AAATGCTTAGATATCACGAAGAACCAGTGGCGAAGGCGAGCCTGTAAGTGCACCTGACATTGAGGCTCGAAAGTGTG  
GGTAT

>ASV:3700:Family:Lachnospiraceae  
TACGTAGGTGGCAAGCGTTATCCGGATTTACTGGGTGTAAGGGAGCGTAGACGGTTTTGCAAGTCTGAAGTAAAGCCC  
GGGGCTTAACCCGGGACTGCTTTGAAACTGTAGGACTAGAGTGCAGGAGAGGTAAGTGGAAATCCCTAGTGTAGCGGTG  
AAATGCGTAGATATTAGGAGGAACACCAGTGGCGAAGGCGGCTTCTGGACGACAAGTACGCTGAGGCGCAAAAGCCAG  
GGGAG

>ASV:3701:Genus:Veillonella  
TACGTATGGTCAAGCGTTATCCGGATTTATTGGGCGTAAAGCGCGCAGGCGGATCAGTCAAGTCTGTCTTAAAGTTT  
GGGGCTTAACCCGCTGATGGATGAAACTGCTGATCTAGATATCGGAGAGGAAAGTGGAAATCCCTAGTGTAGCGGTG

AATGCGTAGATATCGGGAGGAACACCAGTGGCGAAGGCGGCCTACTGGGCACCAACTGACGCTGAGGCTCGAAAAGTGTGG  
GTAGC  
>ASV:3702:Genus:Veillonella  
TACGTAGGTGGCAAGCGTTGTCCGGAATTATTGGGCGTAAAGCGCGCAGGCGGATTGGTCAGTCTGTCTTAAAAAGTTC  
GGGGCTTAACCCCGTATGGGATGGAACTGCCAATCTAGAGTATCGGAGAGGAAAGTGAATTCTAGTGTAGCGGTGA  
AATGCGTAGATATTAGGAGGAGCACCAGTGGCGAAGGCGACGATCTGGACTGCAACTGACGCTCAGTCCGAAAAGCGTGG  
GGAGC  
>ASV:3703:Family:Ruminococcaceae  
TACGTATGGTGAAGCGTTATCCGGATTTACTGGGTGTAAGGGAGCGCAGGCGGGACGGCAAGTCAGATGTGAAAACCTA  
TGGGCTTAACCCATAAACTGCATTTGAACTGTGGTCTTGGAGTGAAGTAGAGGTAAGCGGAATTCCTAGTGTAGCGGTG  
AAATGCGTAGATATTAGGAGGAACATCAGTGGCGAAGGCGGCCTACTGGGCACCAACTGACGCTGAGGCTCGAAAAGTGTG  
GGTAG  
>ASV:3704:Genus:Lachnospiraceae\_UCG-001  
TACGTAGGGGGCAAGCGTTATCCGGATTTACTGGGTGTAAGGGAGCGCAGGCGGTGCGGCAAGTCAGATGTGAAAACCC  
GGGGCTCAACCCCGGACTGCATTTGAACTGTCCGACTAGAGTGCCGGAGAGGTAAGTGAATTCTAGTGTAGCGGTG  
AAATGCGTAGATATTAGGAGGAACACCAGTGGCGAAGGCGGCCTACTGGACGTAAGTACGCTTGGAGGCTCGAAAAGCGTG  
GGGAG  
>ASV:3705:Genus:Paraprevotella  
TACGGAAGATGCGAGCGTTATCCGGATTTATTGGGTTTAAAGGGAGCGTAGGCGGGCTTTTAAAGTCAGCGGTCAAATGTG  
GTGGCTCAACCATGTCAAGCCGTTGAACTGTAAAGCCTTGGAGTCTGCACAGGGCACATGGAATTCGTGGTGTAGCGGCGA  
AATGCGTAGAGATCTGGAGGAATACCGGTGGCGAAGGCGGCCCTTGACAAAGACTGACGCTCAGTGGCGAAAAGCGTGG  
GGAGC  
>ASV:3706:Species:geminatus  
TACGTAGGTGGCAAGCGTTGTCCGGAATGATTGGGCGTAAAGGGCGCGCAGGCGGCTGTGTAAGTCTGTCCAGAAAAGTGC  
GGGGCTAAACCCCGTGAAGGATGGAACTGGACAGCTGAGAGTGTGCGAGAGGAAAGCGGAATTCCTAGTGTAGCGGTG  
AAATGCGTAGATATTAGGAGGAACACCAGTGGCGAAGGCGGCTTTCTGGACGACAAGTACGCTGAGGCGGCAAGCCAG  
GGGAG  
>ASV:3707:Genus:Blautia  
TACGTAGGGGGCAAGCGTTATCCGGATTTACTGGGTGTAAGGGAGCGTAGACGGAAGGCAAGTCTGATGTGAAAAGGCT  
GGGGCTTAACCCAGGACTGCATTTGAACTGTCTTTTCTAGAGTGCAGGAGGTAAGCGGAATTCCTAGTGTAGCGGTG  
AAATGCGTAGATATTAGGAGGAACATCAGTGGCGAAGGCGGCTTACTGGACGTAAGTACGCTTGGAGGCTCGAAAAGCGTG  
GGGAG  
>ASV:3708:Genus:Merdibacter  
TACGTAGGTGGCGAGCGTTATCCGGAATGATTGGGCGTAAAGGGTGCCTAGGTGGCGCGATAAGTCTGGAGTAAAAGGGA  
GCGGCTCAACCGCTGTTGGCTCTGAAACTGTGAGCTAGAGAGCAGGAGAGGGCGATGGAATTCATGTGTAGCGGTTAA  
AATGCGTAGATATTAGGAGGAACACCAGTGGCGAAGGCGGCTGCCTGGCCTGCAACTGACACTGAAGCACGAAAAGCGTGG  
GGAGC  
>ASV:3709:Order:Bacteroidales  
TACGGAGGATCCGAGCGTTATCCGGATTTATTGGGTTTAAAGGGAGCGTAGATGGATGTTTAAAGTCAGTCTGAAAAGTTT  
GCGGCTCAACCGTAAAATTGCAGTTGATACTGGATATCTTGGAGTGCAGTTGAGGCGAGGCGGAATTCGTGGTGTAGCGGTG  
AAATGCGTAGATATAAGGAAGAACCAGTGGCGAAGGCGGATAACTGGACGGCAACTGACGCTGAGGCGGCAAGCGGTG  
GGGAG  
>ASV:3710:Family:Ruminococcaceae  
TACGTAGGTGGCAAGCGTTGTCCGGAATTTACTGGGTGTAAGGGCGTGCAGCCGGGCTGGTAAAGTCAGATGTGAAATCTG  
GAGGCTCAACCTCCAAAGTGCATTTGAACTGCTGGTCTTGGAGTACCAGGAGGTTATCGGAATTCCTTGTGACGCGGTG  
AAATACCTTAGATATCACGAAGAACCAGTGGCGAAGGCGAGTCACTGGACTGCAACTGACACTGATGCTCGAAAAGTGTG  
GGTAT  
>ASV:3711:Family:Lachnospiraceae  
TACGTAGGGGGCAAGCGTTATCCGGATTTACTGGGTGTAAGGGAGCGTAGACGGCAAGGCAAGCCAGATGTGAAAAGCC  
GGGGCTCAACCCCGGACTGCATTTGAACTGTCCAGCCAGAGTGTGCGAGAGGAAAGCGGAATTCCTGGTGTAGCGGTG  
AAATGCGTAGATATCACGAAGAACCAGTGGCGAAGGCGAGTCTGCTAAGCTGCAACTGACGCTGATGCTCGAAAAGTGTG  
GGTAT  
>ASV:3712:Order:Clostridiales  
TACGTAGGGAGCGAGCGTTGTCCGGAATTTACTGGGTGTAAGGGTGCCTAGGCGGCGAGGCAAGTCTGATGTGAAATCCC  
GGGGCTCAACCCCGTACTGCATTTGAACTGTCTGACTAGAGTGTGCGAGGGGTAAGCGGAATTCCTAGTGTAGCGGTG  
AAATGCGTAGATATCACGAAGAACCAGTGGCGAAGGCGAGTCACTAGACTGTCACTGACACTGATGCTCGAAAAGTGTG  
GGTAT  
>ASV:3713:Genus:Oscillibacter  
TACGTAGGTGGCAAGCGTTGTCCGGAATTTACTGGGTGTAAGGGCGTGTAGCCGGGTGTGCAAGTCAGATGTGAAATCTG  
GAGGCTCAACCTCCAAAGTGCATTTGAACTGTGCATCTTGGAGTATCGGAGAGGTCATCGGAATTCCTTGTGTAGCGGTG  
AAATGCGTAGATATAAGGAAGAACCAGTGGCGAAGGCGGATGACTGGACGACAAGTACGCTGAGGCGGCAAGCGGTG  
GGGAG  
>ASV:3714:Family:Lachnospiraceae  
TACGGAGGATCCGAGCGTTATCCGGATTTACTGGGTGTAAGGGAGCGTAGACGGCGCTGCAAGTCTGAAAGTAAAAGCCC  
GGGGCTCAACCCCGGACTGCTTTGAAACTGTAATGCTAGAGTGTGCGAGAGGTAAGTGAATTCTAGTGTAGCGGTG  
AAATGCTTAGATATCACGAAGAACCAGTGGCGAAGGCGAGTCACTGGACTGCAACTGACACTGATGCTCGAAAAGTGTG  
GGTAT  
>ASV:3715:Genus:Roseburia

TACGTATGGTGCAAGCGTTATCCGGATTTACTGGGTGTAAAGGGAGCGCAGGCGGAAGGCTAAGTCTGATGTGAAAGCCC  
GGGGCTCAACCCCGGTACTGCATTGAAAAGTGGTCACTAGAGTGTGCGAGGGGTAAGTGGAATTCCTAGTGTAGCGGTG  
AAATGCTTAGATATCACGAAGAAGTCCGATTGCGAATGCAGCTCACTGGAGTGAACGACGCTGAGGCTCGAAAGCGTG  
GGGAG

>ASV:3716:Order:Bacteroidales

TACGTAGGGGCTAGCGTTATCCGGATTTACTGGGCGTAAAGGGTGCCTAGGTGGTTTCTTAAGTCAGGAGTGAAAGGCT  
ACGGCTCAACCGTAAAATTGCAGTTGATACTGGCAGTCTTGAAGTGCAGTAGAGGTGGCGGAATTCGTGGTGTAGCGGTG  
AAATGCTTAGATATCACGAAGAAGTCCGATTGCGAAGGCAGCTCACTGGAGTGAACGACGCTGATGCTCGAAAGCGTG  
GGTAG

>ASV:3717:Order:Lactobacillales

TACGGAGGATCCGAGCGTTATCCGGATTTATTGGGCGTAAAGCGAGCGCAGGCGGTTTGATAAGTCTGATGTGAAAGCCT  
TTGGCTTAACCAAAGAAGTGCATCGGAAACTGTCAGACTTGAAGTGCAGAAGAGGACAGTGGAATCCATGTGTAGCGGTG  
GGATGCGTAGATATTAGGAGGAACACCAAGTGGCGAAGGCGGCTTACTGGACGGTAACTGACGTTGAGGCTCGAAAGCGTG  
GGGAG

>ASV:3718:Order:Clostridiales

TACGGAGGATCCGAGCGTTATCCGGAACTTACTGGGCGTAAAGGGTGCCTAGGCGGTCTTTCAAGCCAGAAGTGAAAGGCT  
ACGGCTCAACCGTAGTAAGCTTTTGGAACTGTGAGCTAGAGTGTGCGAGAGGAAAGCGGAATTCCTAGTGTAGCGGTG  
AAATGCTTAGATATCACGAAGAAGTCCGATTGCGAAGGCAGCTCACTAGACTGTCACTGACACTGATGCTCGAAAGTGTGG  
GTATC

>ASV:3719:Family:Lachnospiraceae

TACGGAGGATCCGAGCGTTATCCGGATTTATTGGGTTAAAGGGAGCGTAGGCGGCATGGTAAGCCAGATGTGAAAGCCT  
TGGGCTTAACCCGAGGATTGCATTTGAACTATCAAGCTAGAGTACAGGAGAGGAAAGCGGAATTCCTAGTGTAGCGGTG  
AAATGCGTAGATATTAGGAAGAAGTCCGATTGCGAAGGCAGCTCACTAGACTGTTACTGACACTGATGCTCGAAAGTGTG  
GGTAT

>ASV:3720:Family:Lachnospiraceae

TACGGAGGATCCGAGCGTTATCCGGATTTACTGGGTGTAAAGGGAGCGCAGGCGGTACGGCAAGTCTGATGTGAAAGCCC  
GGGGCTCAACCCCGGTACTGCATTGAAAAGTGTGCGACTAGAGTGTGCGAGGGGTAAGTGGAATTCCTAGTGTAGCGGTG  
AAATGCTTAGATATCACGAAGAAGTCCGATTGCGAAGGCAGCTCACTAGACTGTTACTGACACTGATGCTCGAAAGTGTG  
GGTAT

>ASV:3721:Genus:Intestinimonas

TACGTAGGTGGCGAGCGTTATCCGGATTTACTGGGTGTAAAGGGGAGCGTAGGCGGCATGCAAGTCAAGTGTGAAATTTA  
TGGGCTCAACCCATAACCTGCATTTGAAAAGTGTGTCTTGAAGTGTGAGAGGAGGAGGCGGAAATTCCTAGTGTAGCGGTG  
AAATGCGTAGATATACGAAGAAGTCCGATTGCGAAGGCAGCTCACTAGACTGTTACTGACACTGATGCTCGAAAGTGTG  
GGGAG

>ASV:3722:Genus:Lactonifactor

TACGGAGGATCAAGCGTTATCCGGATTTACTGGGTGTAAAGGGAGCGTAGACGGCAGTGAAGTCTGAAGTGAAAGCCC  
GGGGCTCAACCCCGGACTGCTTTGAAAAGTGTGAGCTAGAGTGTGCGAGAGGCAAGCGGAATTCCTAGTGTAGCGGTG  
AAATGCTTAGATATACAGAAGTCCGATTGCGAAGGCAGCTTACCAAACTATATCTGACGTTGAGGCACGAAAGCGTG  
GGGAG

>ASV:3723:Genus:Akkermansia

TACAGAGGTCTCAAGCGTTGTTCCGAACTACTGGGCGTAAAGCGTGCCTAGGCTGTTTCGTAAGTCTGTGTGAAAGGCG  
CGGGCTCAGCCCGGAGCGGACATGATACCCGAGACTAGAGTAAAGGAGGGGAAAGCGGAATTCCTAGTGTAGCAGTG  
AAATGCTTAGATATCACGAAGAAGTCCGATTGCGAAGGCAGCTGCTAAGCTGCAACTGACATTGAGGCTCGAAAGTGTG  
GGTAT

>ASV:3724:Family:Lachnospiraceae

TACGTATGGAGCAAGCGTTATCCGGATTTACTGGGTGTAAAGGGTGCCTAGGTGGCAGTGAAGTGTAGTGTGAAAGGCG  
GGGGCTCAACCCCGGACTGCTTTGAAAAGTGTGAGCTAGAGTACAGGAGAGGCGAGCGGAATTCCTAGTGTAGCGGTG  
AAATGCGTAGATATACAGAAGTCCGATTGCGAAGGCAGCTTACCAAACTATATCTGACGTTGAGGCACGAAAGCGTG  
GGGAG

>ASV:3725:Genus:Marvinbryantia

TACGTAGGGGCAAGCGTTATCCGGATTTACTGGGTGTAAAGGGAGCGTAGACGGCGGCGCAAGTCTGATGTGAAAGCCT  
GGGGCTCAACCCCGAAGTGCATTGAAAAGTGTGCTGCTGGAGTGCAGGAGAGGTAAGCGGAATTCCTAGTGTAGCGGTG  
AAATGCGTAGATATTAGGAGGAACACCAAGTGGCGAAGGCGGCTTACTGGACGGTAACTGACGTTGAGGCTCGAAAGCGTG  
GGGAG

>ASV:3726:Class:Bacteroidia

TACGTAGGTGGCGAGCGTTATCCGGATTTATTGGGTGTAAAGGGTGCCTAGGCGGATTAATAAGTGTGGTCTAAGCCC  
GAAGCTTAACCTCGGTTCCGCCACAAAAGTGTAACTTGAAGTGTGAGTAGAGGCAAGTGGAATTCCTAGTGTAGCGGTG  
AATGCTTAGATATCACGAAGAAGTCCGATTGCGAAGGCAGCTTACTGGATTGAACTGACGCTGATGCTCGAAAGTGTGG  
GTATC

>ASV:3727:Phylum:Firmicutes

TACGTAGGTGGCAAGCGTTATCCGGAACTTACTGGGCGTAAAGGGTGCCTAGGCGGTTAAAAAGTCTGCAAGTGAAGGCA  
ATGGCTCAACCAATGCATGCTGAGAACTGATAGACTAGAGTGCAGGAGAGGTTAAAGCGGAATTCCTAGTGTAGCGGTG  
AATGCGTAGATATAGGAGGAACACCAAGTGGCGAAGGCGGTTAACTGGACTGAACTGACGCTGAGGCACGAAAGCGTG  
GGAGC

>ASV:3728:Genus:Sellimonas

TACGTATGGTGCAAGCGTTATCCGGATTTACTGGGTGTAAAGGGAGCGTAGACGGCTGTGCAAGTCTGGAGTGAAGCCC  
GGGGCTCAACCCCGGATTGCTTTGAAAAGTGTGTAGCTGGAGTACCAGGAGAGGCAAGTGGAATTCCTAGTGTAGCGGTG  
AAATGCGTAGATATTAGGAGGAACACCAAGTGGCGAAGGCGGCTTACTGGACGGTAACTGACGTTGAGGCTCGAAAGCGTG

GGGAG

>ASV:3729:Order:Bacteroidales

TACGGAGGATCCGAGCGTTATCCGGAATTATTGGGCGTAAAGGGAGCGCAGGCGGACCGCAAGTTGGAAGTAAAACTA  
TGGGCTCAACCCATAAATTGCTTTCAAACCTGCTGGCCTTGAGTAGTGCAGAGGTAGGCGGAATTCGTGGTGTAGCGGTG  
AAATGCTTAGATATCACGAAGAAGCTCCGATTGCGAAGGCAGCTCACTGGAGCGCAACTGACGCTGAAGCTCGAAAGTGCG  
GGTAT

>ASV:3730:Order:Clostridiales

TACGGAGGATCCGAGCGTTATCCGGAATTATTGGGCGTAAAGGGAGCGCAGGCGGTTTGTAAAGTCAAGTGTAAATCCA  
TGGGCTCAACCCATGAAGTGCATTTGAAACTGTAGATCTTGAGTGTGGAGGGGCAATCGGAATTCCTAGTGTAGCGGTG  
AAATGTGTAGATATTAGGAGGAACACCAGTGGCGAAGGCGGCTTACTGGACGATAACTGACGCTGAGGCTCGAAAGCGTG  
GGGAG

>ASV:3731:Family:Lachnospiraceae

TACGTAGGGGGCAAGCGTTATCCGGAATTACTGGGTGTAAGGGAGCGTAGACGGTATGACAAGTCTGAAGTAAAAGGCG  
GGGGCTCAACCCCTGGACTGCTTTGAAACTGCCAACTAGAGTGTGGAGAGGTAAGTGAATTCCTAGTGTAGCGGTG  
AAATGCGTAGATATTAGGAGGAACACCAGTGGCGAAGGCGGCTTACTGGACAGTAAGTACGCTTGGAGCTCGAAAGCGTG  
GGGAG

>ASV:3732:Order:Bacteroidales

TACGGAGGATCCGAGCGTTATCCGGAATTATTGGGTTTAAAGGGTGCCTAGGCGGCTTTTAAAGTCAAGCGGTGAAAGTCT  
GTGGCTCAACCATAGAATTGCCGTTGAAACCGGGGGGCTTGGATGTTTGGAGGCGGCAATGCGTGGTGTAGCGGTG  
AAATGCGTAGATATCCGGAGGAACACCAGTGGCGAAGGCGGCTTACTGGGCACCAACTGACGCTGAGGCTCGAAAGTGTG  
GGTAG

>ASV:3733:Order:Bacteroidales

TACGGAGGATCCGAGCGTTATCCGGAATTATTGGGTTTAAAGGGAGCGTAGATGGATGTTTAAAGTCAAGTGTGAAAGTTT  
GCGGCTCAACCGTAAAATTGCAAGTGTACTGGGTGCTTGGATACAGTAGAGGCGGCAATTCCTAGTGTAGCGGTG  
AAATGCGTAGAGATTAGGAAGAACACCAGTGGCGAAGGCGGCTTCTGGACGAAAAGTACGCTTGGAGGCGGCAAGTGTG  
GGTAT

>ASV:3734:Species:coli

TACGGAGGATCCGAGCGTTATCCGGAATTACTGGGCGTAAAGGGAGCGCAGGCGGTTTGTAAAGTCAAGTGTGAAATCCC  
CGGGCTCAACCTGGGAAGTGCATCTGATACTGGCAAGCTTGGATCTCGTAGAGGGGGGTAGAATTCAGGTGTAGCGGTG  
AAATGCGTAGAGATCTGGAGGAATACCAGTGGCGAAGGCGGCCCCCTGGACGAAGACTGACGCTCAGGTGCGAAAGCGTG  
GGGAG

>ASV:3735:Genus:Bacteroides

TACGTAGGGAGCAAGCGTTATCCGGAATTACTGGGTGTAAGGGCGTGTAGGCGGATTGCAAGTCAAGTGTGAAACTG  
GGGGCTCAACCTCCAGCTGCATTTGAAACTGGCAGTCTTGGATACAGTAGAGGTGGGCGGAATTCGTGGTGTAGCGGTG  
AAATGCTTAGATATCACGAAGAAGCTCCGATTGCGAAGGCAGCTCACTAGACTGTCACTGACACTGATGCTCGAAAGTGTG  
GGTAT

>ASV:3736:Kingdom:Bacteria

TACGTATGGGCAAGCGTTATCCGGAATTACTGGGTGTAAGGGAGCGCAGGCGGACCGCAAGTTGGAAGTGAATCCA  
TGGGCTCAACCCGTGAATTGCTTTCAAACCTGCTGGCCTTGAGTAGTGCAGAGGTAGGCGGAATTCCTGGTGTAGCGGTG  
AAATGCTTAGATATCACGAAGAAGCTCCGATTGCGAAGGCAGCTCACTGGAGCGCAACTGACGCTGAAGCTCGAAAGTGCG  
GGGAT

>ASV:3737:Family:Ruminococcaceae

TACGTAGGGAGCAAGCGTTGTCGGATTTACTGGGTGTAAGGGTGCCTAGGCGGCTTTGCAAGTCAAGTGTGAAATCTA  
TGGGCTCAACCCATAAAGTGCATTTGAAACTGTAGAGCTTGGATGAAGTAGAGGCGGCAATTCCTGGTGTAGCGGTG  
AAATGCGTAGATATCACGAAGAAGCTCCGATTGCGAAGGCAGCTGCTAAGCTGCAACTGACATTGAGGCTCGAAAGTGTG  
GGTAG

>ASV:3738:Genus:Cosenzaea

TACGGAGGATCCGAGCGTTATCCGGAATTACTGGGCGTAAAGGGAGCGCAGGCGGTTCAATTAAGTCAAGTGTGAAAGCCC  
CGAGCTTAACCTGGGAATTGCATCTGAAACTGGTGGCTAGAGTCTTGTAGAGGGGGGTAGAATTCATGTGTAGCGGTG  
AAATGCGTAGATATCACGAAGAAGCTCCGATTGCGATGGCAGCTCACTAGACTGTTACTGACACTGATGCTCGAAAGTGTG  
GGTAT

>ASV:3739:Family:Ruminococcaceae

TACGTAGGAAGCAAGCGTTATCCGGAATTACTGGGTGTAAGGGCGCGCAGGCGGGCCGCAAGTTGGGAGTGAATCCC  
GGGGCTTAACCCGGAAGTGCATTTCAAACCTGCTGGTCTTGGATGATGGAGAGGCGGCAATTCCTGGTGTAGCGGTG  
AAATGCTTAGATATCACGAAGAAGCTCCGATTGCGAAGGCAGCTGCTAAGCTGCAACTGACATTGAGGCTCGAAAGTGTG  
GGTAT

>ASV:3740:Family:Lachnospiraceae

TACGTAGGGGGCAAGCGTTATCCGGAATTACTGGGTGTAAGGGAGCGTAGACGGCTCTGCAAGTCTGGAGTGAAGGCC  
GGGGCTCAACCCGGGACTGCTTTGAAACTGTGGAGCTAGAGTGTGGAGAGGCAAGTGAATTCCTAGTGTAGCGGTG  
AAATGCGTAGATATTAGGAGGAACACCAGTGGCGAAGGCGGCTTGGTGGACGATGACTGACGCTTGGAGCTCGAAAGCGTG  
GGGAG

>ASV:3741:Genus:Akkermansia

TACAGAGTCTCAAGCGTTGTTCCGAATCACTGGGCGTAAAGCGTGCCTAGGCTGTTTCTGAAGTCTGTGTGAAAGGCG  
CGGGCTCAACCCGCGGACGGCACATGATACTGCGAGACTAGAGTAGTGGAGGGGGAACCGGAATTCCTGGTGTAGCAGTG  
AAATGCTTAGAGATCATACAGAACACCAGTGGCGAAGGCAGCTTACCAAACTATATCTGACGTTGAGGCACGAAAGCGTG  
GGGAG

>ASV:3742:Genus:Sellimonas

TACGTAGGGGGCAAGCGTTATCCGGAATTACTGGGTGTAAGGGAGCGTAGACGGATAGGCAAGTCTGATGTGAAAGACC

GGGGCTCAACCCGGGACTGCATTGAAACTGTAGATCTAGAGTGCCGGAGAGGTAAGCGGAATTCCTAGTGTAGCGGTG  
AAATGCGTAGATATTAGGAGGAACACCAGTGGCGAAGGCGGCTTACTGGACGGTGACTGACGTTGAGGCTCGAAAGCGTG  
GGGAG

>ASV:3743:Genus:UC5-1-2E3

TACGTAGGGGGCAAGCGTTATCCGGATTTACTTGGTGTAAGGGGAGCGTGGACGGCACAGCAAGTCTGAAGTGAATCCC  
CGGGCTCAACCCCTGGAAGTGCATTTGAAACTGCTGGGCTGGAGTGCTGGAGAGGCAAGCGGAATTCCTAGTGTAGCGGTG  
AAATGCGTAGATATTAGGAGGAACACCAGTGGCGAAGGCGGCTTCTGGACAGTAACGACGTTGAGGCTCGAAAGCGTG  
GGGAG

>ASV:3744:Genus:W5053

TACGTAGGGGGCGAACGTTATCCGGAATGATTGGGCGTAAAGGGTACGTAGGCGGCACCTTAAAGTCAAGTGTGAAAGGCA  
TGGGCTCAACCCATGTAAGCACTTGAAGTGGAGCGCTTGGAGGAAGGAGAGAAAGTGAATTCCTAGTGTAGCGGTGA  
AATGCGTAGATATTAGGAGGAATACCGGTGGCGAAGGCGACTTTCTGGACTTTTTCTGACGCTGAGGTACGAAAGCGGTG  
GGAG

>ASV:3745:Family:Ruminococcaceae

TACGTAGGTGGCAAGCGTTGTCCGGATTTACTGGGTGTAAGGGGCGTGTAGCCGGGAAGGCAAGTCAAGTGTGAAATCCA  
CGGGCTTAACCTCGTGAAGTGCATTTGAAACTACTTTTCTTGGAGTATCGGAGAGGCAATCGGAATTCCTAGCGTAGCGGTG  
AAATGCTTAGATATCACGAAGAATCCGATTGCGAAGGCGACTACTAGACTGTTACTGACACTGATGCTCGAAAGTGTG  
GGTAT

>ASV:3746:Family:Lachnospiraceae

AACGTAGGTCACAAGCGTTGTCCGGAATTACTGGGTGTAAGGGGAGCGTAGACGGTTTTGCAAGTCTGAAGTGAAGGCC  
GGGGCTTAACCCCGGACTGCTTTGAAACTGTAGAAGTGTAGAGTGCAGGAGAGGTAAGTGAATTCCTAGTGTAGCGGTG  
AAACGCGTAGATATTAGGAGGAACACCAGTGGCGAAGGCGACTTTCTGGACAGTAACGACGTTGAGGCACGAAAGTGTG  
GGGAG

>ASV:3747:Order:Bacteroidales

TACGGAGGATCCAGCGTTATCCGGATTTATTGGGTTAAAGGGTGCCTAGGCGGTTTTAGTAAGTCAAGCGGTGAAATTTT  
GGTGCTTAACACCAACGTCGCGTTGAAACTGCTGGGCTAGAGAGTGTGCGGTAGCGGGAATGTATGGTGTAGCGGTG  
AAATGCGTAGAGATGGGAGGAACACCAGTGGCGAAGGCGGCTTCTGGGCTTAACTGACGCTGAGGCACGAAAGCGTG  
GGTAG

>ASV:3748:Order:Bacteroidales

TACGGAGGATCCGAGCGTTATCCGGATTTATTGGGTTAAAGGGAGCGTAGGCGGGTTGTTAAGTCAAGTGTGAAAGTTT  
GCGGCTCAACCCGTAATTTGCAAGTGTGAAACTGGCAGTCTTGGAGTGCAGGAGAGGTAAGCGGAATTCCTAGTGTAGCGGTG  
AAATGCGTAGATATTAGGAGGAACACCAGTGGCGAAGGCGGCTTCTGGACGACAACGACGCTGAGGCACGAAAGCCAG  
GGGAG

>ASV:3749:Genus:Hungatella

TACGGAGGATCCGAGCGTTATCCGGATTTATTGGGTTAAAGGGAGCGTAGACGGTAAAGCAAGTCTGAAGTGAAGGCC  
GGGGCTCAACCCCGTACTGCTTTGAAACTGTTAGACTTGGAGTGCAGGAGAGGTAAGTGAATTCCTAGTGTAGCGGTG  
AAATGCGTAGATATTAGGAGGAACACCAGTGGCGAAGGCGGCTTACTGGACTGTAACGACGTTGAGGCTCGAAAGCGTG  
GGGAG

>ASV:3750:Genus:Eggerthella

TACGTAGGGAGCGAGCGTTATCCGGATTTACTTGGGCGTAAAGAGCGCGTAGGCGGCCTCTCAAGCGGGATCTCTAATCCG  
AGGGCTCAACCCCGGCGGATCCCGAACTGGGAGGCTCGAGTTCGGTAGAGGCAGACGGAATTCCTAGTGTAGCGGTG  
AATGCGCAGATATCGGGAAGAACACCGATGGCGAAGGCGGCTTCTGGGCGCAACTGACGCTGAGGCACGAAAGCTAGG  
GGAG

>ASV:3751:Genus:Family\_XIII\_AD3011\_group

TACGTAGGGGGCAAGCGTTATCCGGAATTTATTGGGCGTAAAGGGTACGTAGGTGGTTACTTAAAGCACAGGGTATAAGGCA  
ATAGCTTAACATTGTTGCGCTTGTGAACTGGGCTACTTGGAGTGCAGGAGAGGAAAGCGGAATTCCTAGTGTAGCGGTG  
AATGCGTAGATATTAGGAGGAACACCAGTGGCGAAGGCGGCTTCTGGACTGTAACGACACTGAGGTACGAAAGCGGTG  
GGAG

>ASV:3752:Order:Bacteroidales

TACGTAGGTGGCAAGCGTTGTCCGGATTTACTGGGTGTAAGGGGCGAGTAGACGGCGCTGTAAGTCAAGTGTGAAAACCTT  
AGGGCTCAACCTAAGCCTGCAGTGTGAACTGTAGTCTTGGAGTACAGTAGAGGTGGCGGGAATTCGTGGTGTAGCGGTG  
AAATGCTTAGATATCACGAAGAATCCGATTGCGAAGGCGAGCTTCTAAGCTGCAACTGACATTGAGGCTCGAAAGTGTG  
GGTAT

>ASV:3753:Order:Clostridiales

TACGTAGGGGGCAAGCGTTGTCCGGAATTTACTGGGCGTAAAGGGTGCCTAGGCGGTTTTGGTAAGTGGATGTGAAATACC  
CGGGCTTAACCTGGGGCTGCATCAATACTGTCGGACTTGGAGTGCAGGAGAGGAAAGCGGAATTCCTAGTGTAGCGGTG  
AAATGCGTAGATATTAGGAGGAACACCAGTGGCGAAGGCGACTTTCTGGACAGAAACTGACGTTGAGGCACGAAAGTGTG  
GGGAG

>ASV:3754:Genus:Oscillibacter

TACGTAGGTGGCAAGCGTTGTCCGGATTTACTGGGTGTAAGGGGCGTGCAGCCGGGCGGCAAGTCAAGTGTGAAATCCG  
TGGGCTTAACCCAGCAACTGCATTTGAAACTGCAGGCTTGGAGTACCAGGAGAGGTTATCGGAATTCCTTGTGTAGCGGTG  
AAATGCGTAGATATAAGGAAGAACACCAGTGGCGAAGGCGGATAACTGGACGGCAACTGACGTTGAGGCACGAAAGCGTG  
GGGAG

>ASV:3755:Order:Selenomonadales

TACGTATGGTGAAGCGTTATCCGGATTTACTGGGTGTAAGGGGAGCGAGGCGGAAGGCTAAGTCTGATGTGAAAGCCC  
GGGGCTCAACCCCGGACTGCATTTGAAACTGCCGCTTGGAGTGCAGGAGAGGAAAGGGGAATTCCTAGTGTAGCGGTG  
AAATGCGTAGATATTGGGAGGAACACCAGTGGCGAAGGCGGCTTCTGGACTGTGTCTGACGCTGAGATGCGAAAGCCAG  
GGTAG

>ASV:3756:Genus:Holdemania  
AACGTAGGTCACAAGCGTTGTCCGGAATTACTGGGTGTAAAGGGTGCAGGCGGTTTTTAAAGTTAAGGTGAAAGCGT  
GGGGCTTAACCCATATAGCCTTAGAACTGAGAGACTAGAGTACAGGAGAGGGCAATGGAATTCATGTGTAGCGGTAA  
AATGCGTAGATATATGGAGGAACACCAGTGGCGAAGGCGGTCTACTGGGCACCAACTGACGCTGAGGCTCGAAAGCATGG  
GTAGC

>ASV:3757:Genus:Agathobacter  
TACGTAAGGGGCAAGCGTTATCCGGATTTACTGGGTGTAAAGGGAGCGCAGGCGGTGCGGCAAGTCTGATGTGAAAGCCC  
GGGGCTCAACCCCGGTACTGCATCTGAACTGTCGACTAGAGTGTGCGGAGGGTAAGCGGAATTCCTAGTGTAGCGGTG  
AAATGCGTAGATATATGGAGGAACACCAGTGGCGAAGGCGACGATCTGGCGCATAACTGACGCTCAGTCCGAAAGCGTG  
GGGAG

>ASV:3758:Genus:GCA-900066225  
TACGTAGGTGGCAAGCGTTGTCCGGAATTACTGGGTGTAAAGGGAGCGTAGGCGGGAGTGCAAGTTGAATGTGAAAAC  
TGGGCTCAACCCATCGTTGCGTTCAAACCTGCAATTTCTTGTAGTGAAGTAGAGGTAAGCGGAATTCCTAGTGTAGCGGTG  
AATGCGTAAATATTAGGAGGAACACCAGTGGCGAAGGCGGCTTACTGGGCTTTAACTGACGCTGAGGCTCGAAAGCGTGG  
GTAGC

>ASV:3759:Genus:Alistipes  
TACGGAGGATTCAAGCGTTATCCGGATTTATTGGGTTTAAAGGGTGCCTAGGCGGTTTGATAAGTTAGAGGTGAAATTT  
AGGGCTCAACCCCTGAACGTGCCTCTAATACTGTTGAGCTAGAGAGTAGTTGCGGTAGGCGGAATGTATGGTGTAGCGGTG  
AAATGCTTAGAGATCATACAGAACACCAGTGGCGAAGGCGACATACCAACTCGGACTGACGCCGAGGCTCGAAAGCGTG  
GGTAT

>ASV:3760:Genus:Bacteroides  
TACGGAGGATCCGAGCGTTATCCGGATTTATTGGGTTTAAAGGGAGCGTAGATGGATGTTTAAAGTCAGTTGTGAAAGTTT  
GCGGCTCAACCCGTAATAATTGCATTTGATACTGGATGCTTGTAGTGCAGTTGAGGCGAGCGGAATTCGTGGTGTAGCGGTG  
AAATGCGTAGATATTAGGAGGAACACCAGTGGCGAAGGCGGCTGCTGGACAACAAGTACGCTGAGGCGCGAAAGCGTG  
GGGAG

>ASV:3761:Family:Ruminococcaceae  
AACGTAGGTCAACAAGCGTTGTCCGGAATTACTGGGTGTAAAGGGCGCTAGGCGGTTCTGCAAGTCAGATGTGAAATGCC  
GGGGCTTAACCCCGGACTGCATTTGAAACTGCGGTTCTTGTAGTGCAGGAGGAAAGTGAATTCCTAGTGTAGCGGTG  
AAATGCGTAGATATTAGGAGGAACACCAGTGGCGAAGGCGGCTTCTGGACAGAACTGACGCTGAGGCGCGAAAGCGTG  
GGGAG

>ASV:3762:Genus:Ruminococcaceae\_UCG-013  
TACGTAGGTGGCGAGCGTTGTCCGGATTTACTGGGTGTAAAGGGCGGTAGGCGGGACTGCAAGTCAGATGTGAAATACC  
GGGGCTTAACCCCGGGGCTGCATTTGAAACTGCGGTTCTTGTAGTGCAGGAGAGGAAAGCGGAATTCCTAGTGTAGCGATG  
AAATGCGTAGATATTAGGAGGAACACCAGTGGCGAAGGCGATTTGCTGGGCTGTAAGTACGCTGAGGCGCGAAAGCGTG  
GGGAG

>ASV:3763:Family:Lachnospiraceae  
TACGTAGGGAGCGAGCGTTATCCGGATTTACTGGGTGTAAAGGGAGCGTAGACGGATTAGCAAGTCTGATGTGAAAGGCA  
GGGGCTCAACCCCTGGACTGCATTTGAAACTGCCAGTCTTGTAGTGCAGGAGAGGTAAGCGGAATTCCTAGTGTAGCGGTG  
GAATGCGTAGATATCGGAGGAACACCAGTGGCGAAGGCGGCTTACTGGGCACCAACTGACGCTGAGGCTCGAAAGTGTG  
GGTAG

>ASV:3764:Genus:Lachnospiraceae\_FCS020\_group  
TACGTAGGGGGCAAGCGTTATCCGGATTTACTGGGTGTAAAGGGAGCGTAGGCGGTTCTGCAAGTCAGAAAGTAAAGCCC  
GCGGCTTAACCCGCGGACTGCTTTTGAACCTGCTGGACTGGATTGCAGGAGAGGTAAGCGGAATTCCTGGTGTAGCGGTG  
AAATGCGTAGATATCAGGAGGAACACCAGTGGCGAAGGCGGCTTACTGGACTGTAATGACGCTGAGGCTCGAAAGCGTG  
GGGAG

>ASV:3765:Species:coquinae/psychrophilus  
TACGTAGGTGGCAAGCGTTATCCGGATTTATTGGGCGTAAAGCGCGCTAGGCGGTTAAATAAGTCTGATGTGAAAGCCC  
CCGGCTCAACCCGGGAGGGTATTGAAACTGTTTTACTTGTAGTACAGAAAGAGGAGTGAATTCATGTGTAGCGGTG  
AAATGCGCAGAGATATGGAGGAACACCAGTGGCGAAGGCGGCTCTCTGGTCTGTTACTGACGCTGAGGTGCGAAAGCGTG  
GGGAT

>ASV:3766:Genus:Granulicatella  
TACGTAGGTGGCAAGCGTTGTCCGGATTTATTGGGCGTAAAGCGAGCGCAGGCGGTTCTTAAAGTCTGATGTGAAAGCCC  
CCGGCTCAACCCGGGAGGGGCTTGGAACTGGGAACTTGTAGTGCAGAAAGAGGAGTGAATTCATGTGTAGCGGTG  
AAATGCGTAGATATATGGAGGAACACCAGTGGCGAAGGCGACTCTCTGGTCTGTAAGTACGCTGAGGCTCGAAAGCGTG  
GGTAG

>ASV:3767:Family:Ruminococcaceae  
TACGTAGGGGGCGAGCGTTGTCCGGATTTACTGGGTGTAAAGGGTGCCTAGGCGGGATGGCAAGTCTGATGTGAAATACC  
GGGGCTTAACCCCGGGGCTGCATTTGAAACTGTCGGTCTTGTAGTATCGGAGAGGTAACCGGAATTCCTAGTGTAGCGGTG  
AAATGCGTAGATATTAGGAAGAACACCAGTGGCGAAGGCGGTTACTGGACGACAAGTACGCTGAGGCGCGAAAGCGTG  
GGGAG

>ASV:3768:Genus:Anaerofilum  
AACGTAGGTGGCAAGCGTTGTCCGGATTTACTGGGTGTAAAGGGAGCGCAGGCGGAATGCAAGTTGGATGTCAAATCTA  
CGGGCTCAACCCGTATACGCATTTCAAACCTGCGGTTCTTGTAGTGTAGGAGGTAAGGCGGAATTCCTGGTGTAGCGGTG  
AATGCGTAGATATCGGAGGAACACCAGTGGCGAAGGCGGCTTACTGGGCACCAACTGACGCTGAGGCTCGAAAGTGTGG  
GTAGC

>ASV:3769:Genus:Lachnospiraceae\_UCG-004  
TACGTATGGTCAAGCGTTATCCGGATTTACTGGGTGTAAAGGGAGCGTAGACGGCGACGCAAGTCTGAAGTGAATACC  
CGGGCTCAACCTGGAACTGCTTTGAAACTGTGTTGCTAGAGTGTGAGAGGTAAGCGGAATTCCTAGTGTAGCGGTG

AAATGCTTAGATATCACGAAGAACTCCGATTGCGAAGGCAGCCTGCTAAGCTGCAACTGACATTGAGGCTCGAAAGTGTG  
GGTAT  
>ASV:3770:Genus:Anaerofilum  
TACGTAGGGAGCGAGCGTTGTCCGGAATTACTGGGTGTAAGGGAGCGCAGGCGGAGCTGTAAGTTGGGCGTCAAATCTA  
CGGGCTTAACCCGTATCCGCGCTCAAACCTGTGGCTCTTGAGTAGTGCAGAGGTAGGTGGAATTCCTGGTGTAGCGGTGG  
AATGCGTAGATATCGGGAGGAACACCAGTGGCGAAGGCGGCTTACTGGACGATAACTGACGCTGAGGCTCGAAAGCGTGG  
GGAGC  
>ASV:3771:Family:Veillonellaceae  
TACGTATGGAGCAAGCGTTGTCCGGAATTATTGGGCGTAAAGCGCGCAGGCGGCTTCTTAAGTCCATCTTAAAAGTGC  
GGGGCTTAACCCGTATGGGATGGAACTGGGAGGCTGGAGTATCGGAGAGGAAAGTGAATTCCTGGTGTAGCGGTGG  
AATGCGTAGATATCGGGAGGAACACCAGTGGCGAAGGCGACCTACTGGGCACCAACTGACGCTGAGGCTCGAAAGCATGG  
GTAGC  
>ASV:3772:Family:Ruminococcaceae  
TACGTAGGGAGCAAGCGTTGTCCGGAATTACTGGGTGTAAGGGAGCGTAGGCGGGCAGGCAAGTCAGGCGTGAATATA  
TCGGCTCAACCCGTAACGGCGCTTGAACCTGCAGGTCTTGAGTGGAGTAGAGGCAAGCGGAATTCCTAGTGTAGCGGTGA  
AATGCGTAGATATTCGGAGGAACACCAGTGGCGAAGGCGGCTTCTGGGCTCTAACTGACGCTGAGGCGCAAAGCGTGG  
GGAGC  
>ASV:3773:Genus:Allorhizobium-Neorhizobium-Pararhizobium-Rhizobium  
TACGAAGGGGGCTAGCGTTGTTCGGAATTACTGGGCGTAAAGCGCACGTAGGCGGATATTTAAGTCAGGGGTGAAATCCC  
AGAGCTCAACTCTGGAAGTGCCTTTGATACTGGGTATCTTGAGTATGGAAGAGGTGAGTGAATTCCTAGTGTAGAGGTG  
AAATTCGTAGATATTCGGAGGAACACCAGTGGCGAAGGCGGCTACTGGTCCATTACTGACGCTGAGGTGCGAAAGCGTGG  
GGAG  
>ASV:3774:Genus:Coprococcus\_3  
TACGTATGGTGAAGCGTTATCCGATTACTGGGTGTAAGGGAGCGTAGACGGCGTGAAGTCTGAAGTGAAGGCC  
GGGGCTCAACCCCGGACTGCTTTGAAACTATGCAGCTAGAGTGTGCGAGAGGTAAGTGAATTCCTAGTGTAGCGGTG  
AAATGCTTAGATATCACGAAGAACTCCGATTGCGAAGGCAGCCTGCTAAGCTGCAACTGACATTGAGGCTCGAAAGTGTG  
GGTAT  
>ASV:3775:Family:Lachnospiraceae  
TACGTAGGGGGCAAGCGTTATCCGATTACTGGGTGTAAGGGAGCGTAGACGGCAAGGCAAGTCTGATGTGAAAACCC  
AGGGCTTAACCTGGGACTGCATTGAAACTGTCTAGCTCGAGTGCAGGAGGTAAGCGGAATTCCTAGTGTAGCGGTG  
AAATGCTTAGATATCACGAAGAACTCCGATTGCGAAGGCAGCTTACTAACCTGTAAGTACATTGATGCTCGAAAGTGTG  
GGTAT  
>ASV:3776:Genus:Fournierella  
AACGTAGGTGGCAAGCGTTGTCCGGAATTACTGGGTGTAAGGGAGCGCAGGCGGATTTGCAAGTTGGAAGTGAACCCA  
TGGGCTCAACCCATGAAGTGCCTTCAAACCTGCAGATCTTGAGTGGTGTAGAGGTAGGCGGAATTCCTGGTGTAGCGGTG  
GAATGCGTAGATATCGGGAGGAACACCAGTGGCGAAGGCGGCTTACTGGGCACTAACTGACGCTGAGGCTCGAAAGCATG  
GGTAG  
>ASV:3777:Genus:Ruminococcaceae\_UCG-010  
TACGTAGGTGGCAAGCGTTATCCGGAATTACTGGGTGTAAGGGTGTGTAGGCGGGCTGCAAGTCAAGTGTGAAAATTA  
TGGGCTCAACCCATAAAGTGCCTGAAACTGTAGCTCTTGAGAGTGGGAGAGGTAACCGGAATTCCTGGTGTAGCGGTG  
AAATGCGTAGATATCGGGAGGAACACCAGTGGCGAAGGCGGTTTACTGGACCAACTGACGCTGAGACACGAAAGCGTGG  
GGAG  
>ASV:3778:Order:Bacteroidales  
TACGGAAGGTCCGGGCGTTATCCGATTACTGGGTGTAAGGGTGCCTAGGCGGCTTTCGCAAGTCAAGTGTGAAATCTA  
TGGGCTCAACCCATAAAGTGCAGTTGAAACTGTTATCTTGAGTGGAGTAGAGGCAAGCGGAATTCCTAGTGTAGCGGTG  
AAATGCTTAGATATCACGAAGAACTCCGATTGCGAAGGCAGCTACTGGAGCGCAACTGACGCTGAAGTCTCGAAAGTGGC  
GGTAT  
>ASV:3779:Order:Clostridiales  
AACGTAGGTCAAGCGTTGTCCGGAATTACTGGGCGTAAAGGGTGCCTAGGCGGTTTGGTAAGTTGGATGTGAAATACC  
CGGGCTTAACCTGGGGCTGCATCCAATACTGTCGGACTTGAGTGCAGGAGAGGAAAGCGGAATTCCTAGTGTAGCGGTG  
AAATGCGTAGATATTAGGAGGAACACCAGTGGCGAAGGCGACTTACTGGACTGCTACTGACACTGAGGCACGAAAGCGTGG  
GGAG  
>ASV:3780:Family:Lachnospiraceae  
TACGTAGGGGGCAAGCGTTATCCGATTACTGGGTGTAAGGGAGCGTAGACGGTTTTGCAAGTCTGAAGTGAAGGCC  
GGGGCTCAACCCGGAACTGCTTTGAAACTGTTGGGCTAGAGTGTGAGAGGCAAGCGGAATTCCTAGTGTAGCGGTG  
AAATGCGTAGATATTGGAAGAAACACCAGTGGCGAAGGCGACCTCTGGGACATGACTGACGCTCATGCACGAAAGCGTGG  
GGAG  
>ASV:3781:Genus:Dialister  
TACGTAGGTGGCAAGCGTTGTCCGGAATTATTGGGCGTAAAGCGCGCAGGCGGCTTCCCAAGTCCCTCTTAAAAGTGC  
GGGGCTTAACCCGTATGGGAAGGAACTGGGAAGCTGGAGTATCGGAGAGGAGAGTGAATTCCTAGTGTAGCGGTGA  
AATGCTTAGATATCACGAAGAACTCCGATTGCGAAGGCAGCTACTGGACTGCAACTGACACTGATGCTCGAAAGTGTGG  
GTATC  
>ASV:3782:Family:Fusobacteriaceae  
TACGTATGTCGCAAGCGTTATCCGATTACTGGGCGTAAAGCGCGTCTAGGCGGCTTGTAAAGTCTGATGTGAAAATGC  
GGGGCTCAACCCGATTTGCGTTGAAACTGCTAACTAGAGTACTGGAGAGGTAGGCGGAACTACAAGTGTAGAGGTGA  
AATGCGTAGATATTAAGAAATAACCGGTGGCGAAGGCGACTTACTGGGCTCATTCTGACGCTGAGGAACGAAAGCGTGG  
GTAGC  
>ASV:3783:Genus:Roseburia

AACGTAGGTCACAAGCGTTGTCCGGAATTACTGGGTGTAAAGGGAGCGCAGGCGGAAGGCTAAGTCTGATGTGAAAGCCC  
GGGGCTCAACCCCGTACTGCATTGAAAAGTGGTCACTAGAGTGTCCGAGGGGTAAGTGGAATTCCTAGTGTAGCGGTG  
AAATGCGTAGATATTAGGAGGAACACCAGTGGCGAAGGCGGCTTACTGGGCTTTAACTGACGCTGAGGCTCGAAAGCGTG  
GGGAG  
>ASV:3784:Order:Bacteroidales  
TACGGAGGATCCGAGCGTTATCCGGATTTATTGGGTTTAAAGGGTGCCTAGGTGGTATGGCAAGTCAGAAGTGAAAACCC  
AGGGCTTAACTCTGGGACTGCTTTTAAAAGTGTGAGACTGGAGTGCAGGAGAGGTAAGCGGAATTCGTGGTGTAGCGGTG  
AAATGCGTAGATATCACGAAGAAGTCCGATTGCGAAGGCAGCTGCTAAGCTGCAACTGACATTGAGGCTCGAAAGTGTG  
GGTAT  
>ASV:3785:Family:Ruminococcaceae  
AACGTAGGGTCAAGCGTTGTCCGGAATTACTGGGTGTAAAGGGTGCAGGCGGGTGGTCAAGTTGGATGTGAAAGGTA  
TGGGCTTAAACCATAGACTGCATCCAAAAGTATTCTTGAAGTGAAGTAGAGGCGAGGCGGAATTCGAGTGTAGCGGTG  
GAATGCGTAGATATTCGAGGAACACCAGTGGCGAAGGCGGCTGCTGGGCTTTAACTGACGCTGAGGCACGAAAGCATG  
GGGAG  
>ASV:3786:Family:Enterobacteriaceae  
TACGGAGGGTCAAGCGTTAATCCGGAATTACTGGGCGTAAAGCACACGCAGGCGGTCTGTCAAGTCGGATGTGAAATCCC  
CGGGCTCAACCTGGAACTGCATTGAAAAGTGGCAGGCTAGAGTCTTGTAGAGGGGGTGAATTCAGGTGTAGCGGTG  
AAATGCGTAGATATTCGAGGAATACCGTGGCGAAGGCGGCCCTTGACAAAGACTGACGCTCAGGTGCGAAAGCGTG  
GGGAG  
>ASV:3787:Genus:Desulfovibrio  
TACGGAGGGTCAAGCGTTAATCCGGATCACTGGACGTAAAGCGCACGTAGGCTGTTATGTAAGTCAGGGGTGAAATCCC  
ACGGCTCAACCGTGAAGTGCCTTGTACTGCACGACTTGAATCCGGGAGAGGGTGGCGGAATTCAGGTGTAGGAGTG  
AAATCCGTAGATATTCGAGGAACATCAGTGGCGAAGGCGGCCACCTGGATCGGTATTGACGCTGAGGTGCGAAAGCGTG  
GGGAG  
>ASV:3788:Genus:Acidaminococcus  
TACGTAGGTGGCAAGCGTTGTCCGGAATTATTGGGCGTAAAGAGCATGTAGGCGGGCTTTTAAAGTCTGACGTGGAATGC  
GGGGCTTAAACCCGATGGCGTTGGATACTGGAAGTCTTGAAGTGCAGGAGAGGAAAGGGGAATTCAGTGTAGCGGTG  
AAATGCGTAGATATCACGAAGAAGTCCGATTGCGAAGGCGAGCTTACTGGATTGTAAGTACGCTGATGCTCGAAAGTGTG  
GTATC  
>ASV:3789:Genus:UC5-1-2E3  
TACGTAGGGGGCAAGCGTTATCCGGATTTACTGGGTGTAAAGGGAGCGTAGACGGCACAGCAAGTCTGAAGTGAATCCC  
CGGGCTCAACCCGGAACTGCTTTGAAAAGTGGGCTAGAGTGTGGAGAGGCAAGCGGAATTCCTAGTGTAGCGGTG  
AAATGCGTAGATATTAGGAGGAACACCAGTGGCGAAGGCGGCTTGTGGACAGTAACTGACGTTGAGGCGCGAAAGCGTG  
GGGAG  
>ASV:3790:Family:Lachnospiraceae  
TACGTATGGGGCAAGCGTTATCCGGATTTACTGGGTGTAAAGGGAGCGTAGGCGGCATGGCAAGTCAGAAGTGAAAGGCT  
GGGGCTCAACCCGACTGCTTTTAAAAGTGTCTAACTAGAGTGCAGGAGAGGTAAGTGGAATTCCTAGTGTAGCGGTG  
AAATGCGTAGATATGGGGAGGAACACCAGTGGCGAAGGCGGCTGCTGGGCTTTAACTGACGCTGAGGCACGAAAGCGTG  
GGTAG  
>ASV:3791:Family:Ruminococcaceae  
TACGTAGGGAGCAAGCGTTGTCCGGATTTACTGGGTGTAAAGGGTGCCTAGGCGGCTTTGCAAGTCAGATGTGAAATCCA  
TGGGCTCAACCCATGAAGTGCCTTTGAAAAGTGTCTAACTAGAGTGCAGGAGAGGTAAGTGGAATTCCTAGTGTAGCGGTG  
GAATGCGTAGATATTAGGAGGAACACCAGTGGCGAAGGCGGCTCTCTGGTCTGTAAGTACGCTGAGGCTCGAAAGCGTG  
GGGAG  
>ASV:3792:Family:Bifidobacteriaceae  
TACGTAGGGTCAAGCGTTATCCGGAATTATTGGGCGTAAAGGGCTCGTAGGCGGTTCTGTCGCTCCGGTGTGAAAGTCC  
ATCGCTTAAACCCGACTGCTTTTAAAAGTGTCTAACTAGAGTGCAGGAGAGGTAAGTGGAATTCCTAGTGTAGCGGTG  
GAATGCGTAGATATCACGAAGAAGTCCGATTGCGAAGGCAGCATACTGGGTTGAAACAGACGCTGAAGCACGAAAGCGTG  
GGTAT  
>ASV:3793:Genus:Ruminococcaceae\_UCG-005  
TACGTAGGTTGCAAGCGTTGTCCGGATTTACTGGGTGTAAAGGGCGTGTAGGCGGAGATGCAAGTCAGGAGTGAATCCC  
GGGGCTCAACCCGGAAGTGCCTTTTAAAAGTGTATCCCTTGAAGTGTGCGAGAGGCAAGCGGAATTCCTAGTGTAGCGGTG  
AAATGCGTAGATATTAGGAGGAACACCAGTGGCGAAGGCGGCTTGTGGACGATAACTGACGCTGAGGCGCGAAAGCGTG  
GGGAG  
>ASV:3794:Class:Bacteroidia  
TACGGAGGATCCGAGCGTTATCCGGATTTATTGGGTTTAAAGGGAGCGTAGACGGCGCAGCAAGTCTGATGTGAAAGGCA  
GGGGCTTAAACCCGACTGCTTTTAAAAGTGTCTGCTTGAAGTGCAGGAGGGGTAAGCGGAATTCCTAGTGTAGCGGTG  
AAATGCGTAGATATCACGAAGAAGTCCGATTGCGAAGGCAGCTCACTAGACTGTTACTGACACTGATGCTCGAAAGTGTG  
GGTAT  
>ASV:3795:Genus:Corynebacterium  
TACGTAGGGTGCAGCGTTGTCCGGAATTACTGGGCGTAAAGAGCTCGTAGGTGGTTTTATCGGTCGCTGTGAAATCCC  
GGGGCTTAACTTCCGGCGTGCAGGCGATACGGGCATAACTTGAAGTGTGTAGGGGAGACTGGAATTCCTGGTGTAGCGGT  
GGAATGCGCAGATATCAGGAGGAACACCGATGGCGAAGGCAGGCTCTGGGAAGTAACTGACGCGGAGGAGCGAAAGCAT  
GGGGA  
>ASV:3796:Genus:Sutterella  
TACGTAGGTGGCAAGCGTTGTCCGGATTTACTGGGTGTAAAGGGCGCGTAGGCGGGATGGCAAGTCAGATGTGAAGTCCC  
CGGGCTCAACCTGGGAATTCATATATGACTGCAGGACTTGAAGTGTGTAGAGGAGGGTGAATTCACGCTGTAGCAGTG  
AAATGCGTAGATATGTGAAGAAGTCCGATTGCGAAGGCAGCCCTCTGGGACATGACTGACGCTCATGCAGAAAGCGTG



GGGAG

>ASV:3797:Genus:Alistipes

TACGGAGGATTCAAGCGTTATCCGGATTTATTGGGTTTAAAGGGTGCCTAGGCGGTTTGATAAGTTAGAGGTGAAATACC  
GGTGCTTAACCCGGAACTGCCTTAATACTGTTGAACTAGAGAGTAGTTGCGGTAGCGGAATGTATGGTGTAGCGGTG  
AAATGCGTAGATATTAGGAGGAACACCAGTGGCGAAGGCGGATTGCTGGACGACAACTGACGGTGAGGCGCAAAGCGTG  
GGGAG

>ASV:3798:Family:Peptococcaceae

TACGTAGGTGGCAAGCGTTGTCCGGATTTACTGGGCGTAAAGGGCGTGTAGGTGGATGATCAGTCGGATGTGAAAGCCC  
CGGGCTTAACCCGGGAACGGCATCCGATACGGTCCGTCTTGTAGTGCAGGAGAGGGCAGTGGAATTCAGTGTAGCGGTG  
AAATGCGTAGAGATTGGGAGGAACACCAGTGGCGAAGGCGGCTGCTGGACTGTAACGACACTGAGGCGCAAAGCGTG  
GGGAG

>ASV:3799:Genus:Parabacteroides

TACGGAGGATCCGAGCGTTATCCGGATTTATTGGGTTTAAAGGGTGCCTAGGCGGCCTTTTAAAGTCAGCGGTGAAAGTCT  
GTGGCTCAACCATAGAATTGCCGTTGAAACTGGGGGCTTGTAGTATGTTTGTAGGCGAGCGGAATGCGTGGTGTAGCGGTG  
AAATGCATAGATATCACGAGAACCCGATTGCGAAGGCAGTCACTGGAGCGCAACTGACGCTGAAGCTCGAAAGTGCG  
GGTAT

>ASV:3800:Order:Clostridiales

TACGTAGGGAGCAAGCGTTGTCCGGATTTACTGGGTGTAAGGGTGCCTAGGCGGCCTTTCAAGTCAGATGTGAAAACCC  
GGGGCTTAACCCGGGCTGCATTTGAAACTGTAGGGCTTGTAGTGTGGAGAGGTAAGCGGAATTCAGTGTAGCGGTG  
AAATGCGTAGATATTAGGAGGAACACCAGTGGCGAAGGCGACTTTCTGGACAATAACTGACGTTGAGGCACGAAAGTGTC  
GGGAG

>ASV:3801:Kingdom:Bacteria

TACGTAGGTGGCAAGCGTTGTCCGGATTTATTGGGCGTAAAGCGCGCTAGACGGCTGAGTAAGTTACTGGTAAAAGCCC  
AGCTTTTAAAGCTGGAATTGCCGTAATACTGTTGAGTGTAGTGCAGGAGAGGGAAGCGGAATTCAGTGTAGCGGTG  
AAATGCTTAGATATCACGAAGAACTCCGATTGCGAAGGCAGTCACTGGAGCGCAACTGACGCTGAAGCTCGAAAGTGCG  
GGTAT

>ASV:3802:Kingdom:Bacteria

TACGGAGGATCCGAGCGTTATCCGGATTTATTGGGTGTAAGGGAGCGTAGGTGGATTGTTAAGTCAGTTGTGAAAGTTT  
GCGGCTCAACCGTAAAATTGCAGTTGAAACTGGCAGTCTTGTAGTACAGTAGAGGTAGGCGGAATTCGCGGTGTAGCGGTG  
GAATGCGTAGATATCGGGAGGAACACCAGTGGCGAAGGCGGCTACTGGGCACCAACTGACGCTGAGGCTCGAAAGTGTC  
GGTAG

>ASV:3803:Family:Bifidobacteriaceae

TACGTAGGTGGCAAGCGTTATCCGGATTTACTGGGTGTAAGGGAGCGTAGACGGACTGGCAAGTCTGATGTGAAAGTCC  
ATCGCTTAACGGTGGATCTGCGCCGGGTACGGGCGGCTGGAGTGCAGTAGGGGAGACTGGAATTCGCGGTGTACGGTG  
GAATGCTTAGATATCGGGAAGAACACCAATGGCGAAGGCAGTCTCTGGGCCGTTACTGACGCTGAGGAGCGAAAGCGTG  
GGGAG

>ASV:3804:Kingdom:Bacteria

TACGGAGGATCCGAGCGTTATCCGGATTTATTGGGTTTAAAGGGAGCGTAGGTGGATTGTTAAGTCAGTTGTGAAAGTTT  
GCGGCTCAACCGTAAAATTGCAGTTGAAACTGGCAGTCTTGTAGTACAGTAGAGGTGGCGGAATTCGCGGTGTACGGTG  
GAATGCTTAGATATCGGGAAGAACACCAATGGCGAAGGCAGTCTCTGGGCCGTTACTGACGCTGAGGCTCGAAAGCGTG  
GGGAG

>ASV:3805:Species:newyorkensis

TACGTAGGTGGCAGCGTTATCCGGATTTACTGGGCGTAAAGGGTGCAGGCGGCCGGGCAAGTCCGAGTAAAAGTCTG  
GAGGCTCAACCTTACGGGCTGCGGAACTGTCCGGCTGGAGAGCAGGAGAGGACGGTGGAACTCCATGTGTAGCGGTAA  
AATGCGTAGATATGGAAGAACACCGGTGGCGAAGGCGGCGTCTGGCCTGCATCTGACGCTGAGGACGAAAGCGTG  
GGAGC

>ASV:3806:Order:Clostridiales

TACAGAGGTCTCAAGCGTTGTTCCGAACTACTGGGCGTAAAGGTGTGCGTAGGCTGTTTCTGTAAGTCTGTGTGAAAGGCG  
CGGGCTCAACCCGCGGACGGCAGTACTGCGAGACTAGAGTGTGCGAGGGGTAAGCGGAATTCAGTGTAGCGGTG  
AAATGCGTAGATATTAGGAGGAACACCAGTGGCGAAGGCGGCTTACTGGACGATAACTGACGCTGAGGCTCGAAAGCGTG  
GGGAG

>ASV:3807:Genus:Phoceae

TACGTAGGGAGCAAGCGTTGTCCGGATTTACTGGGTGTAAGGGAGCGTAGGCGGGTCTCAAGTCGAATGTTAAATCTA  
CCGGCTCAACTGGTAGCTGCGTTCCGAACTGGGGCTCTTGTAGTGAAGTAGAGGCAAGCGGAATTCAGTGTAGCGGTGA  
AATGCGTAGATATTAGGAGGAACACCAGTGGCGAAGGCGGCTGCTGGGCTTTTACTGACGCTGAGGCTCGAAAGCGTG  
GGAGC

>ASV:3809:Family:Fusobacteriaceae

TACGTATGTCGCAAGCGTTATCCGGATTTATTGGGCGTAAAGCGCGTCTAGGCGGTTTGGTAAGTCTGATGTGAAAATGC  
GGGGCTCAACTCTGTATTGCGTTGAAACTGTAAACTAGAGTACTGGAGAGGTAGGCGGAATTCAGTGTAGAGGTGA  
AATGCGTAGAGATGTGGAGGAATACCGAAGGCGAAGGCGAGCCCTTGGGAATGTACTGACGCTCATGTGCGAAAGCGTG  
GGAGC

>ASV:3810:Family:Ruminococcaceae

TACGGAGGATCCGAGCGTTATCCGGATTTACTGGGTGTAAGGGCGCGTAGGCGGGAATGCAAGTCAGATGTGAAATCCA  
AGGGCTCAACCTTGAAGTGCATTTGAAACTGTAGTCTTGTAGTGAAGTAGAGGCAAGCGGAATTCAGTGTAGCGGTG  
AAATGCGTAGATATTGAGGAGGAACACCAGTGGCGAAGGCGGCTTGTGGGCTTTAAGTACTGACGCTGAGGCTCGAAAGTGTC  
GGGAG

>ASV:3811:Genus:Ruminococcus\_1

TACGTAGGGAGCGAGCGTTGTCCGGATTTACTGGGTGTAAGGGAGCGTAGGCGGGATCGAAGTCAGATGTGAAAACCTA

TGGGCTTAACCCATAAACTGCATTTGAACTGTGGTTCTTGAGTGAAGTAGAGGTAAGCGGAATTCCTAGTGTAGCGGTG  
AAATGCGTAGATATCAGGAGGAACATCAGTGGCGAAGGCGGGTTCTGGACATTAACGTACGCTGAGGCACGAAGGCCAG  
GGGAG  
>ASV:3812:Genus:Alistipes  
TACGTAGGTGGCAAGCGTTATCCGGAATTACTGGGTGTAAGGGTGCCTAGGCGGGCTGTCAAGTCAGATGTGAAATACC  
GGGGCTCAACTCCGGAAGTGCCTCTAATACTGTTGAACTAGAGAGTAGTTGCGGTAGGCGGAATGTATGGTGTAGCGGTG  
AAATGCTTAGAGATCATACAGAACACCGATTGCGAAGGCAGCTTACCAAATATATCTGACGTTGAGGCTCGAAAGCGTG  
GGGAG  
>ASV:3813:Genus:Lactonifactor  
TACGTAAAGGGGCAAGCGTTATCCGGATTTACTGGGTGTAAGGGAGCGTAGACGGCACGGCAAGCCAGATGTGAAAGCCC  
GGGGCTCAACCCGGGACTGCATTTGGAAGTCTGAGCTAGAGTGTCTGGAGAGGCAAGTGGAAATTCCTAGTGTAGCGGTG  
AAATGCTTAGAGATCATACAGAACACCGATTGCGAAGGCAGCTTACCAAATATATCTGACGTTGAGGCACGGAAAGCGTG  
GGGAG  
>ASV:3814:Family:Clostridiales\_vadinBB60\_group  
TACGTAGGATGCAAGCGTTATCCGGAATGACTGGGCGTAAAGGGTGCCTAGGCGGTAATCAAGTTGCGAGCGTAATTC  
GAGGCTTAACCTCGGAAGTACTGCCCCAAACTGGTGAAGTGTGTCAGGGGTAAGTGGAAATTCCTAGTGTAGCGGTG  
GAATGCGTAGATATTAGGAGGAACACCGAGGCGAAAGCGACTTACTGGGGCATAACTGACGCTGAGGCACGAAAGCGTG  
GGGAG  
>ASV:3815:Genus:Bacteroides  
TACGGAGGATCCGAGCGTTATCCGGATTTATTGGGTTAAAGGGAGCGTAGGCGGGCTTTAAGTCAGTTGTGAAAGTTT  
GCGGCTCAACCGTAAATTTGAGTTGATACTGGAAGCCTTGAGTACAGTATAGGCAGGCGGAATTCGTGGTGTAGCGGTG  
AAATGCTTAGATATCACGAAGAAGTCCGATTGCGAAGGCAGCTTGTGACTGTAACGTACGCTGATGCTCGAAAGTGTG  
GGTAT  
>ASV:3816:Family:Lachnospiraceae  
TACGTATGGTGAAGCGTTATCCGGATTTACTGGGTGTAAGGGAGCGCAGGCGGTGCGGCAAGTCTGATGTGAAAGCCC  
GGGGCTCAACCCGGGACTGCTTTTGAAGTGCAGGGCTAGAGTGCAGGAGGGGCAAGTGGAAATTCCTAGTGTAGCGGTG  
AAATGCGTAGATATTAGGAGGAACACCGAGTGGCGAAGGCGGCTTACTGGACGGTAACGTACGTTGAGGCTCGAAAGCGTG  
GGGAG  
>ASV:3817:Genus:Lactobacillus  
TACGTAGGTGGCAAGCGTTGTCCGGATTTATTGGGCGTAAAGGGAACGCAGGCGGTCTTTAAGTCTGATGTGAAAGCCT  
TCGGCTTAACCGGAGTAGTGCATTGGAAGTGCAGGACTTGAGTGCAGAAGAGGAGAGTGGAACTCCATGTGTAGCGGTG  
AAATGCGTAGATATATGGAAGAACACCGAGTGGCGAAGGCGGCTCTCTGGACGACAACGTATGCTGAGGCGCGAAAGCCAG  
GGGAG  
>ASV:3818:Genus:Acidaminococcus  
TACGTAGGTGGCAAGCGTTGTCCGGAATTTATTGGGCGTAAAGAGCATGTAGGCGGGCTTTAAGCCTGACGTGAAAATGC  
GGGGCTTAACCCGATGGCGTTGGATACTGGAAGTCTTGAGTGCAGGAGAGGAAAGGGGAATTCAGTGTAGCGGTGA  
AATGCTTAGAGATCATACAGAACACCGATTGCGAAGGCAGCTTACCAAATATATCTGACGTTGAGGCACGAAAGCGTGG  
GGAGC  
>ASV:3819:Family:Lachnospiraceae  
TACGTAGGGGGCAAGCGTTATCCGGATTTACTGGGTGTAAGGGAGCGTAGACGGCTGTGCAAGTCTGAAGTGAAGGCA  
TGGGCTCAACCTGTGGACTGCTTTGGAAGTGCACATACTTGAGTGCAGGAGGGGTAAGCGGAATTCCTAGTGTAGCGGTG  
AAATGCGTAGATATTAGGAAGAAGTCCGATTGCGAAGGCAGCTGCTAAGCTGCAACTGACATTGAGGCTCGAAAGCGTG  
GGGAG  
>ASV:3820:Genus:Lachnospira  
TACGTATGGTGAAGCGTTATCCGGATTTACTGGGTGTAAGGGAGCGTAGGCGGCATGGCAAGTGCAGAAGTGAAGCCT  
GGGGCTCAACCCAGGAATGCTTTTGAAGTGCAGGGCTAGAGTGCAGGAGGGGCAAGTGGAAATTCCTAGTGTAGCGGTG  
AAATGCGTAGATATTAGGAGGAACACCGAGTGGCGAAGGCGGCTTGTAGACTGTAACGTACACTGAGGCTCGAAAGCGTG  
GGGAG  
>ASV:3821:Species:argenteratense/sputi  
TACGTAGGGTGCAGCGTTGTCCGGAATTTACTGGGCGTAAAGAGCTCGTAGGTGTTTGTGCGCTCGTCTGTGAAATTC  
GGGGCTTAACCCGGGCGTGCAGGCGATACGGGCATAACTTGAGTGTGAGGGGAGACTGGAATTCCTGGTGTAGCGGT  
GAAATGCGCAGATATCAGGAGGAACACCGATTGCGAAGGCAGGCTCTGGGCAGTAACGTACGCTGAGGAGCGAAAGCAT  
GGGGA  
>ASV:3822:Genus:Angelakisella  
TACGTAGGGAGCGAGCGCTGTCCGGAATTTACTGGGTGTAAGGGAGCGTAGGCGGGAAGGCAAGTTGGATGTGAAAAC  
TGGGCTCAACCGACAGACTGCATTCAAAGTGTCTTTCTTGAGTGAAGTAGAGGCAAGCGGAATTCCTAGTGTAGCGGTG  
AAATGCGTAGATATTAGGAGGAACACCGAGTGGCGAAGGCGGCTTGTGGGCTTTTACTGACGCTGAGGCTCGAAAGTGTG  
GGGAG  
>ASV:3823:Family:Lachnospiraceae  
TACGTAGGTGGCAAGCGTTATCCGGATTTACTGGGTGTAAGGGAGCGTAGACGGCATGGCAAGCCAGATGTGAAAGCCC  
GGGGCTCAACCCGGGACTGCATTTGGAAGTGTGAGGCTAGAGTGTCTGGAGAGGAAAGCGGAATTCCTGGTGTAGCGGTG  
AAATGCTTAGATATCACGAAGAAGTCCGATTGCGAAGGCAGCTCACTAGACTGCAACTGACACTGATGCTCGAAAGTGTG  
GGTAT  
>ASV:3824:Family:Ruminococcaceae  
TACGGAGGATCCAAGCGTTATCCGGATTTATTGGGTGTAAGGGCGTGTAGGCGGGATCGCAAGTGCAGATGTGAAAAC  
TGGGCTCAACCTCCAGCCTGCATTTGAAACTGTGGTCTTGAGTACTGGAGAGGCAGACGGAATTCCTAGTGTAGCGGTG  
AAATGCGTAGATATAAGGAAGAACACCGAGTGGCGAAGGCGGATAACTGGACGGCAACTGACGGTGGGCGCGAAAGCGTG  
GGGAG

>ASV:3825:Genus:UBA1819  
AACGTAGGGTGCAAGCGTTGTCCGGAATTACTGGGTGTAAAGGGAGCGCAGGCGGATTGGCAAGTTGGGAGTGAAATCTA  
TGGGCTCAACCCATAAATTGTTTTCAAACCTGTCAGTCTTGAGTGCAGTTGAGGCAGGCGGAATTCGTGGTGTAGCGGTG  
AAATGCTTAGATATCACGAAGAAGCTCCGATTGCGAAGGCAGCCTGCTAAGCTGCAACTGACATTTGAGGCTCGAAAGTGTG  
GGTAT

>ASV:3826:Genus:Lachnospiraceae\_UCG-010  
TACGTAGGGGGCAAGCGTTATCCGGAATTACTGGGTGTAAAGGGTGAGTAGGCGGCATGGCAAGTAAGATGTGAAAGCCC  
GAGGCTTAACCCCGGACTGCTTTGAGACTGTTCTGCTAGAGTGTCTGGAGAGGTAAGTGGAAGTACAAAGTGTAGAGGTG  
AAATGCTTAGATATCACGAAGAAGCTCCGATTGCGAAGGCAGCTCACTGGAGTGTAACTGACGCTGATGCTCGAAAGTGTG  
GGTAT

>ASV:3827:Family:Fusobacteriaceae  
TACGGAGGATGCGAGCGTTATCCGGATTTATTGGGTTTAAAGGGAGCGTAGACGGCGGAGCAAGTCTGAAGTGAAGCCC  
GGGGCTCAACCCCGGACTGCTTTGAGACTGTTCTGCTAGAGTGTCTGGAGAGGTAAGTGGAAGTACAAAGTGTAGAGGTG  
AAATTCGTAGATATTTGTAGGAATGCCGATGGGGAAGCCAGCCTACTGGACAGATACTGACGCTAAAGCGCGAAAGCGTG  
GGTAG

>ASV:3828:Genus:Bacteroides  
TACGGAGGATCCGAGCGTTATCCGGATTTATTGGGTTTAAAGGGAGCGTAGGTGGATTGTTAAGTCAGTTGTGAAAGTTT  
GCGGCTCAACCCCGGACTGCTTTGAGACTGTTCTGCTAGAGTGTCTGGAGAGGTAAGTGGAAGTACAAAGTGTAGAGGTG  
AAATGCTTAGATATTTGGGAGGAACACCAGTGGCGAAGGCGCCTTTCTGGACTGTGTCTGACGCTGAGATGCGAAAGCCAG  
GGTAG

>ASV:3829:Genus:Dorea  
TACGTAGGGGGCAAGCGTTATCCGGATTTACTGGGTGTAAAGGGAGCGTAGACGGCACGGCAAGCCAGATGTGAAAGCCC  
GGGGCTCAACCCCGGACTGCTTTGAGACTGTTCTGCTAGAGTGTCTGGAGAGGCAAGTGGAATTCCTAGTGTAGCGGTG  
AAATGCTTAGATATTTAGGAGGAACACCAGTGGCGAAGGCGCCTTTCTGGACTGTGTCTGACGCTGAGATGCGAAAGCCAG  
GGGAG

>ASV:3830:Family:Lachnospiraceae  
TACGGAGGATCCAAGCGTTATCCGGAATTACTGGGTGTAAAGGGAGCGCAGGCGGGCGATCAAGTTGGAAGTGAATCCA  
TGGGCTCAACCCCGGACTGCTTTGAGACTGTTCTGCTAGAGTGTCTGGAGAGGCAATCGGAATTCCTAGTGTAGCGGTG  
AAATGCTTAGATATTTAGGAAGAACACCAGTGGCGAAGGCGCCTTTCTGGACTGTGTCTGACGCTGAGATGCGAAAGCCAG  
GGTAT

>ASV:3831:Family:Ruminococcaceae  
TACGTAGGGAGCAAGCGTTATCCGGATTTACTGGGTGTAAAGGGCGTGTAGGCGGATGAACAAGTCAGATGTGAAATCTG  
GGGGCTCAACCCCGGACTGCTTTGAGACTGTTCTGCTAGAGTGTCTGGAGAGGCAAGTGGAATTCCTAGTGTAGCGGTG  
AAATGCTTAGATATTTAGGAGGAACACCAGTGGCGAAGGCGCCTTTCTGGACTGTGTCTGACGCTGAGGCGCGAAAGCGTG  
GGGAG

>ASV:3832:Genus:Ruminiclostridium\_5  
TACGTAGGGAGCAAGCGTTGTCCGGATTTACTGGGTGTAAAGGGTGCGTAGGCGGCTAGGCAAGTCAGACTGAAAACCA  
TGGGCTCAACCTGTGGACTGCGTTTGAAGCTGTTTACTGCTTGGAGTGTAGGAGAGGAGGAGAGTGGAAATTCCTAGTGTAGCGGTG  
AAATGCTTAGATATTTAGGAGGAACACCAGTGGCGAAGGCGCCTTTCTGGACTGTGTCTGACGCTGAGATGCGAAAGCCAG  
GGTAG

>ASV:3833:Genus:Asaccharospora  
TACGTAGGGAGCAAGCGTTATCCGGATTTACTGGGCGTAAAGGGTGCGTAGGCGGCTTTTAAAGTCAGGAGTGAAGGCT  
ACGGCTCAACCGTAGTAAGCTCTTGAAGCTGGAGACTTGTAGTGCAGGAGAGGAGAGTGGAAATTCGTGGTGTAGCGGTGA  
AATGCTTAGATATCACGAAGAAGCTCCGATTGCGAAGGCAGCCTGCTAAGCTGCAACTGACATTTGAGGCTCGAAAGTGTGG  
GTATC

>ASV:3834:Genus:Bacteroides  
TACGGAGGATCCGAGCGTTATCCGGATTTATTGGGTTTAAAGGGAGCGTAGGTGGATTGTTAAGTCAGTTGTGAAAGTTT  
GCGGCTCAACCGTAAATTTGAGTGTAAAGCTGGCAGTCTTGTAGTACAGTAGAGGTGGGCGGAATCCGTGGTGTAGCGGTG  
AAATGCTTAGAGATCATAACAGAACCCGATTGCGAAGGCAGCTTACCAAATATATCTGACGTTGAGGCACGAAAGCGTG  
GGGAG

>ASV:3835:Species:cadaveris  
TACGTAGGTGGCAGCGTTATCCGGATTTACTGGGCGTAAAGGATGCGTAGGTGGAATTTTAAAGTGGGATGTGAAATACC  
CGGGCTCAACCTGGGAAGTGCATTTCAAAGCTGGAATTTCTAGAGTGCAGGAGAGGAAAGCGGAATTCCTAGTGTAGCGGTG  
AAATGCTTAGAGATTAGGAAGAACACCAGTGGCGAAGGCGCCTTTCTGGACTGTAAGTACACTGAGGCTGAAAGCGTG  
GGGAG

>ASV:3836:Family:Ruminococcaceae  
AACGTAGGGTGCAAGCGTTGTCCGGATTTACTGGGTGTAAAGGGAGCGCAGGCGGACCGGCAAGTTGGAAGTGAAGTGA  
TGGGCTCAACCCATAAATTGCTTTCAAACCTGTTGGCCTTGTAGTGTGAGAGGTGGGCGGAATTCGTGGTGTAGCGGTG  
AAATGCTTAGATATCACGAAGAAGCTCCGATTGCGAAGGCAGCTCACTAGACTGTTACTGACACTGATGCTCGAAAGTGTG  
GGTAT

>ASV:3837:Genus:Ruminococcaceae\_UCG-004  
TACGTAGGGAGCAAGCGTTATCCGGATTTACTGGGTGTAAAGGGCGTGTAGGTGGGAGTGAAGTCAAGTCAAGTGTGAAAGTGA  
TGGGCTCAACCCATAGCCTGCATTTGAAGCTGTACTTCTTGTAGTGTGAGAGGCGAGGCGGAATTCCTGTTGTAGCGGTG  
AAATGCTTAGATATACGGAGGAACACCAGTGGCGAAGGCGCCTTTCTGGACTGTAAGTACACTGACGCTGAGGCGCGAAAGCGTG  
GGGAG

>ASV:3838:Genus:Akkermansia  
TCCCTCTTTCTCCCTCTTTTTCTTCTCCCTGGGCGTAAAGCGTGCAGTGGCTGTTTCGTAAGTCTGTGTGAAAGGCG  
CGGGCTCAACCCCGGACGGACATGATACTGCGAGACTAGAGTAATGGAGGGGAACCGGAATTCCTGGTGTAGCAGTG

AAATGCGTAGATATCGAGAGGAACACTCGTGGCGAAGGCGGGTTCTTGACATTAAGTACGCTGAGGCACGAAGGCCAG  
GGGAG  
>ASV:3839:Species:anthropi/grignonense/pituitosum/pseudogrignonense  
TACGAAGGGGGCTAGCGTTGTTCCGGATTTACTGGGCGTAAAGCGCACGTAGGCGGACTTTTAAAGTCAGGGGTGAAATCCC  
AGAGCTCAACTCTGGAAGTGCCTTTGATACTGGAAGTCTTGAGTATGGTAGAGGTGAGTGAATTCAGGTGTAGAGGTG  
AAATCGTAGATATTCGGAGGAACACCAGTGGCGAAGGCGGCTCACTGGACCATTACTGACGCTGAGGTGCGAAAGCGTG  
GGGAG  
>ASV:3840:Genus:Parvimonas  
TACGTATGGGGCGAGCGTTGTCCGGAATTATTGGGCGTAAAGGGTACGTAGGCGGTTTTTAAAGTCAGGTGTCAAAGCGT  
GGAGCTTAACCCATTAAGCACTTGAAGTGAAGAGCTTGAAGTGAAGGAGAGAAAGTGAATTCCTAGTGTAGCGGTGA  
AATGCGTAGATATTAGGAGGAATACCGGTGGCGAAGGCGACTTTCTGGACTTTTACTGACGCTCAGGTACGAAAGCGTG  
GGAGC  
>ASV:3841:Family:Lachnospiraceae  
TACGTAGGGGGCAAGCGTTATCCGGATTTACTGGGTGTAAGGGAGCGTAGGCGGCGGCAAGTCAGAAGTAAAACCC  
AGGGCTTAACCTCTGGGATTGCTTTTGAAGTGTCCGGCTGGATTGCCGAGAGGTAAAGTGAATTCCTAGTGTAGCGGTG  
AAATGCGTAGATATTAGGAGGAACACCAGTGGCGAAGGCGGCTTACTGGACGCTAATGACGCTGAGGCTCGAAAGCGTG  
GGGAG  
>ASV:3842:Order:Bacteroidales  
TACGGAGGATTAAGCGTTATCCGGATTTATTGGGTTTAAAGGGTGCCTAGGCGGCTAGGCAAGTCAGAGCTGAAAACCA  
TGGGCTCAACCTGTGGACTGCTTTTGAAGTGTTCCTTGGAGTGAAGTAGAGGTAGGCGGAATTCCTAGTGTAGCGGTG  
AAATGCTTAGATATCACGAAGAATCCGATTGCGAAGGCAGCTTCTAAGCTGCAACTGACATTGAGGCTCGAAAGTGTG  
GGTAT  
>ASV:3843:Genus:Peptoniphilus  
TACGTAGGGGGCAAGCGTTGTCCGGAATCACTGGGCGTAAAGGGTTCGAGGCGGAAATGCAAGTCAGTTGTGAAAGGCA  
GAGGCTCAACCTCTGTAAAGCAATTGAAACTGTATTTCTTGGAGTGTGGAGAGGCAAGTGAATTCCTAGTGTAGCGGTG  
AATGCGTAGATATTAGGAAGAATACCGGTGGCGAAGGCGACTTGTGGACACAAACTGACGCTGAGGAACGAAAGCGTG  
GTAGC  
>ASV:3844:Genus:Oscillospira  
TACGTAGGTGGCAAGCGTTGTCCGGATTTACTGGGTGTAAGGGCGGTAGCCGGAGAGACAAGTCAGATGTGAAATCCG  
CGGGCTCAACCCGCGAAGTGCATTTGAAACTGTTTCCCTTGGAGTATCGGAGAGGTAACCGGAATTCCTAGTGTAGCGGTG  
AAATGCGTAGATATTAGGAAGAATCCGATTGCGAAGGCAGCTTACTGGATTGTAAGTACGCTGATGCTCGAAAGTGTG  
GGTAT  
>ASV:3845:Order:Clostridiales  
TACGTAGGGGGCGAGCGTTGTCCGGAATTATTGGGCGTAAAGGGTGCCTAGGCGGCAAGTAAAGTCAGATGTGAAATGCC  
AGGGCTTAACCTGGAGCTGCATTTGAAACTGCATGCTTGGAGTGCAGGAGAGGGAAGCGGAATTCCTAGTGTAGCGGTG  
AAATGCATAGATATTAGGAGGAACACCAGTGGCGAAGGCGGCTTTCTGGACTGTAAGTACGCTGAGGCACGAAAGCGTG  
GGGAG  
>ASV:3846:Genus:Alistipes  
TACGTAGGTGGCAAGCGTTGTCCGGATTTACTGGGTGTAAGGGGAGCGTAGACGGAAGTGAAGTCTGAAGTAAAAGCCC  
GGGGCTCAACCCCGGACTGCCTTAATACTGTTAGACTAGAGAGTGTGCGGTAGGCGGAATGTATGGTGTAGCGGTG  
AAATGCTTAGAGATCACAGAACACCAGTGGCGAAGGCAGCTTACCAACTATGACTGACGTTGAGGCACGAAAGCGTG  
GGGAG  
>ASV:3847:Order:Clostridiales  
TACGTAGGTGGCAAGCGTTGTCCGGATTTACTGGGTGTAAGGGGCGGTAGGCGGAGAGACAAGTCAGATGTGAAATCTA  
TGGGCTTAACCCATAAAGTGCATTTGAAACTATCTCCCTTGGAGTGTGGAGAGGCAAGCGGAATTCCTGGTGTAGCGGTG  
AAATGCTTAGATATCACGAAGAATCCGATTGCGAAGGCAGCTTGTGGACTGTAAGTACGCTGATGCTCGAAAGTGTG  
GGTAT  
>ASV:3848:Family:Lachnospiraceae  
TACGTAGGGGGCAAGCGTTATCCGGATTTACTGGGTGTAAGGGGAGCGTAGACGGACTGGCAAGTCTGATGTGAAAGCCC  
GGGGCTCAACCCCGGTACTGCATTGGAAGTGTCTGACTAGAGTGTGCGAGGGGTAAGCGGAATTCCTAGTGTAGCGGTG  
AAATGCTTAGATATCACGAAGAATCCGATTGCGAAGGCAGCTTCTAGGTTGCGACAGACGCTGAGGCACGAAAGCGTG  
GGGAG  
>ASV:3849:Order:Betaproteobacteriales  
TACGTAGGTCCGAGCGTTGTCCGGATTTATTGGGCGTAAAGCGAGCGCAGGCGGTTAGATAAGTCTGAAGTTAAAGGCT  
GTGGCTTAACCATAGTACGCTTTGAAACTGTTAACTTGAAGTGCAGAGGGGAGGTGGAATTCACCGTGTAGCAGTGAA  
ATGCGTAGATATGTGGAAGAACACCAGTGGCGAAGGCAGCTTCTGGACATAACTGACGCTCAGGCACGAAAGCGTGG  
GAGCA  
>ASV:3850:Family:Ruminococcaceae  
TACGTAGGGTGAAGCGTTATCCGGATTTATTGGGCGTAAAGGGAGCGCAGGCGGACCGGCAAGTTGGAAGTAAAACCTA  
TGGGCTCAACCCATAAATTGCTTTCAAAGTGTGCTGCTTGGAGTGTGAGAGGTAAGCGGAATTCCTAGTGTAGCGGTG  
GAATGCGTAGATATCACGAGAATCCGATTGCGAAGGCAGCTTACTAAACCATAACTGACTGAAAGCACGAAAGCGTG  
GGGAT  
>ASV:3851:Family:Ruminococcaceae  
TACGTAGGTGGCGAGCGTTGTCCGGATTTACTGGGTGTAAGGGAGTGTAGGCGGGAAGGCAAGTCAGAAGTAAAATTA  
TGGGCTTAACCCATAAAGTGTCTTTGAAACTGTTTTCTTGGAGTGTGGAGAGGAAAGTGAATTCCTAGTGTAGCGGTG  
AAATGCTTAGATATCACGAAGAATCCGATTGCGAAGGCAGCTTACTGGATTGTAAGTACGCTGATGCTCGAAAGTGTG  
GGTAT  
>ASV:3852:Order:Bacteroidales

TACGGAGGATCCGAGCGTTATCCGGATTTATTGGGTTAAAGGGAGCGCAGGCGGGTATCAAGTCAGCTGTGAAAACCTA  
CGGGCTTAACCCGTAGACTGCAGTTGAAACTGTTTCATCTTGAAGTGAAGTAGAGGTTGGCGGAATCCGAGTGTAGCGGTG  
AAATGCTTAGATATCACGAAGAAGCTCCGATTGCGAAGGCAGCTTACTGGATTGTAACGACGCTGATGCTCGAAAGTGTG  
GGTAT

>ASV:3853:Species:massiliensis

TACGTAGGGAGCGAGCGTTGTCCGGAATTACTGGGTGTAAGGGAGCGTAGGCGGGGAGGCAAGTTGGATGTGAAAACCTA  
TCGGCTCAACTGATAGACTGCATTCAAACCTGTTCTCTTGAAGTGAAGTAGAGGCGAGCGGAATTCCTAGTGTAGCGGTG  
AAATGCGTAGATATTAGGAGGAACACCAAGTGGCGAAGGCGGCTGCTGGGCTTTTACTGACGCTGAGGCTCGAAAGTGTG  
GGGAG

>ASV:3854:Genus:Bacteroides

TACGGAGGATCCGAGCGTTATCCGGATTTATTGGGTTAAAGGGAGCGTAGATGGATGTTTAAAGTCAGTTGTGAAAAGTTT  
GCGGCTCAACCGTAAAATTGCAGTTGATACTGGATGTCTTGAAGTGCAGTTGAGGCGAGCGGAATTCGTGGTGTAGCGGTG  
AAATGCGTAGATATCGAGAGGAACACTCGTGGCGAAGGCGGCTTCTGGACATTAACGACGCTGAGGCACGAAGGCCAG  
GGGAG

>ASV:3855:Family:Ruminococcaceae

TACGGAGGATCCGAGCGTTATCCGGATTTATTGGGTTAAAGGAAGCGTAGATGGATGTTTAAAGTCAGTTGTGAAAAGTTT  
GCGGCTCAACCGTAAAATTGCAGTTGATACTGGATGTCTTGAAGTGTGACAGAGGTAGGCGGAATTCCTGGTGTAGCGGTG  
GAATGCGTAGATATCGGGAGGAACACCAAGTGGCGAAGGCGGCTTACTGGGCACCAACTGACGCTGAGGCTCGAAAGTGTG  
GGTAT

>ASV:3856:Genus:Erysipelatoclostridium

TACGTAGGTGGCGAGCGTTATCCGGAATTATTGGGCGTAAAGAGGGAGCAGGCGGGCAGAGGTCTGTGGTAAAAGACT  
GAAGCTTAACCTCAGTAAGCCATAGAAACCGGCTGCTAGAGTGCAGGAGAGGATCGTGGAAATTCATGTGTAGCGGTG  
AATGCGTAGAGATCTGGAGGAATACCGGTGGCGAAGGCGGCCCTTGACAAAGACTGACGCTCAGGTGCGAAAGTGTG  
GTATC

>ASV:3857:Order:Clostridiales

TACGTAGGGGGCGAGCGTTATCCGGAATTACTGGGTGTAAGGGTGCCTAGGCGGCATCGTAAGTCTGTTGTGAAAAGTG  
ATGGCTTAACCATCGAAGTGCATGAAACTGCGGAGCTAGAGTGCAGGAGAGGAAAGCGGAATTCCTAGTGTAGCGGTG  
AAATGCGTAGATATTAGGAAGAACACCAAGTGGCGAAGGCGGCTTCTGGACTGCAACTGACGCTGAGGCACGAAGCGTG  
GGGAG

>ASV:3858:Family:Bifidobacteriaceae

TACGGAGGATCCGAGCGTTATCCGGATTTATTGGGTTAAAGGGAGCGTAGGTGGACTGGTAAAGTCAGTTGTGAAAAGTTT  
GCGGCTCAACCGTAAAATTGCAGTTGATACTGTCAGTCTTGAAGTACAGTAGGGGAGAGTGGAAATTCCTGGTGTAAAGCTG  
GAATGTGTAGATATCGGAAGAACACCAATGGCGAAGGCGAGTCTCTGGGCCGTTACTGACGCTGAGGAGCGAAAGCGTG  
GGGAG

>ASV:3859:Species:indoligenes

TACGTAGGGGGCAAGCGTTATCCGGATTTACTGGGTGTAAGGGAGCGCAGACGGCTATGCAAGTCTGAAGTGAAGGCC  
GGGCTCAACCCCGGACTGCTTTGGAAACTGTGTAGCTAGAGTGTGCGGAGAGGTAAGCAGAATTCCTAGTGTAGCGGTG  
AAATGCGTAGATATTGGGAAGAATACCGGTGGCGAAGGCGGCTTACTGGACGATAACTGACGTTGAGGCTCGAAGGCGTG  
GGGAG

>ASV:3860:Order:Bacteroidales

TACGGAGGATCCGAGCGTTATCCGGATTTATTGGGTTAAAGGGAGCGTAGGCGGGTGTAAAGTCAGTTGTGAAAAGTTT  
GCGGCTCAACCCCGGACTGCTTTGGAAACTGTGTAGCTAGAGTGTGCGGAGAGGTAAGCAGAATTCCTAGTGTAGCGGTG  
GAATGCGTAGATATATGGAAGAACACCAAGTGGCGAAGGCGGCTCTCTGGTCTGCAACTGACGCTGAGGCTCGAAAGCATG  
GGTAG

>ASV:3861:Kingdom:Bacteria

TACGGAGGATCCGAGCGTTATCCGGATTTACTGGGTGTAAGGGCGGTGAGGCGGAGAAGCAAGTCAGAAGTGAATCCA  
TGGGCTTAACCCCGGACTGCTTTGGAAACTGTTTCCCTTGAAGTATCGGAGAGGCGAGCGGAATTCCTAGTGTAGCGGTG  
AAATGCTTAGATATCACGAAGAAGCTCCGATTGCGAAGGCGGCTGCTAGACTGTAACGACGCTGATGCTCGAAAGTGTG  
GGTAT

>ASV:3862:Genus:Angelakisella

TACGTAGGAAGCGAGCGTTGTCCGGAATTACTGGGTGTAAGGGAGCGTAGGCGGGAAGGCAAGTTGGATGTGAAAAGCTG  
TGGGCTCAACCTACAGACTGCATTCAAACCTGTTTTCTTGAAGTGAAGTAGAGGCAAGCGGAATTCCTAGTGTAGCGGTG  
AAATGCGTAGATATTAGGAGGAACACCAAGTGGCGAAGGCGGCTTCTGGGCTTTTACTGACGCTGAGGCTCGAAAGTGTG  
GGGAG

>ASV:3863:Genus:Blautia

TACGTAGGGGGCAAGCGTTATCCGGATTTACTGGGTGTAAGGGAGCGTAGACGGACTGGCAAGTCTGATGTGAAAAGCGG  
GGAGCTCAACCCCGGACTGCTTTGGAAACTGTTAGTCTTGAAGTGCAGGAGAGGTAAGCAGAATTCCTAGTGTAGCGGTG  
AAATGCGTAGATATTAGGAGGAACACCAAGTGGCGAAGGCGGCTTACTGGACGTAACGACGTTGAGGCTCGAAAGCGTG  
GGAAG

>ASV:3864:Kingdom:Bacteria

TACGTAGGGGGCGAGCGTTATCCGGATTTACTGGGTGTAAGGGCGGTGACGCGGGCATGCAAGTCAGATGTGAAATCTC  
AGGGCTTAACCCCGAAGTGCATTTGAAACTGTATGTCTTGAAGTGCAGGAGAGGTAATCGGAATTCGTGGTGTAGCGGTG  
AAATGCTTAGATATCACGAAGAAGCTCCGATTGCGAAGGCGGCTTACTGGACGTAACGACGTTGAGGCTCGAAAGCGTG  
GGTAT

>ASV:3865:Genus:Christensenellaceae\_R-7\_group

AACGTAGGTACAAGCGTTGTCCGGAATGATTGGGCGTAAAGGGCGCGTAGGCGGCTGCTAAGTCTGGAGTGAAGTCC  
TGCTTCAAGGTGGGAATTGCTTTGGATACTGGTGGGCTGGAGTGCAGGAGAGGAAAGCGGAATTCCTGGTGTAGCGGTG  
GAATGCGTAGATATCGGGAGGAACACCAAGTGGCGAAGGCGGCTTACTGGGCACCAACTGACGCTGAGGCTCGAAAGTGTG

GGTAG  
>ASV:3866:Order:Bacteroidales  
TACGGAGGATCCGAGCGTTATCCGGATTTATTGGGTTTAAAGGGAGCGCAGACGGGTCGTTAAGTCAGTTGTGAAAAGTTT  
GCGGCTCAACCGTAAAATTGCAGTTGATACTGTCAGTCTTGAGTACAGTAGAGGTAGCGGGAATGCGTGGTGTAGCGGTG  
AAATGCATAGATATCACGCAGAACTCCGATTGCGAAGGCAGCTTACTAAACCATAACTGACACTGAAGCACGAAAGCGTG  
GGAT  
>ASV:3867:Genus:Megasphaera  
TACGTAGGTGGCAAGCGTTTATCCGGATTTATTGGGCGTAAAGGGCGCGCAGGCGGCATCGCAAGTCGGTCTTAAAAGTGC  
GGGGCTTAACCCGTGAGGGGACCGAAACTGTGAAGCTCGAGTGTGCGGAGAGGAAAGCGGAATTCCTAGTGTAGCGGTG  
AATGCTTAGACATCACGAAGAACTCCGATTGCGAAGGCAGCACACTAATCCGTAAGTACGTTATGCTCGAAAGTGTGG  
GTAGC  
>ASV:3868:Genus:Bacteroides  
TCCTTCTTCTCTCTCTTTCTCTTCTTTCTTTTTTTTAAAGGGAGCGTAGATGGATGTTTAAAGTCAGTTGTGAAAAGTTT  
GCGGCTCAACCGTAAAATTGCAGTTGATACTGGATGTCTTGAGTGCAGTTGAGGCAGCGGGAATTCGTGGTGTAGCGGTG  
AAATGCTTAGATATCACGAAGAACTCCGATTGCGAAGGCAGCTGCTAAGCTGCAACTGACATTGAGGCTCGAAAGTGTG  
GGTAT  
>ASV:3869:Family:Lachnospiraceae  
TACGTAGGGGGCAAGCGTTTATCCGGATTTGCTGGGTGTAAGGGAGGTAGGTGGCTGTGCAAGTCAGGAGTAAAAGGCC  
GGGGCTCAACCCGGGACTGCTCTTAAAAGTGCAGCTTGAGTGCAGGAGGGGAGCGGGAATTCCTAGTGTAGCGGTG  
AAATGCGTAGATATTAGGAGGAACACCGGTGGCGAAGGCAGCTGCTGGACTGTAACGACACTGAGGCTCGAAAGCGTG  
GGGAG  
>ASV:3870:Family:Ruminococcaceae  
TACGTAGGTGGCAAGCGTTTATCCGGATTTACTGGGTGTAAGGGAGCGCAGGCGGGATGCAAGTCAGTGTGAAAAGTAA  
TGGGCTCAACCCATAAACTGCAGTTGAAACTGTTATTTCTTGAGTGGAGTAGAGGCAAGCGGAATTCGAGTGTAGCGGTG  
AAATGCGTAGATATCACGCAGAACTCCGATTGCGAAGGCAGCTGCTAGGGTGCAGACAGCGTGGAGCACGAAAGCGTG  
GGTAT  
>ASV:3871:Genus:Erysipelatoclostridium  
TACGTAGGTGGCGAGCGTTTATCCGGATTCATTGGGCGTAAAGGGAGCGAGGCGCAGTGCAGTCTGCGGTGAAAAGCC  
GGAGCTAAAATTCGGTAAGCCGTGAAACCGCACAGCTAGAGAGCATCAGAGGATCGCGGAATTCCTAGTGTAGCGGTG  
AATGCGTAGATATATGGAGGAACACCGAGTGGCGAAGGCAGCATCTGGCGCATAACTGACGCTCAGTCCGAAAGCGTG  
GGAGC  
>ASV:3872:Family:Clostridiales\_vadinBB60\_group  
TACGTAGGGGGCAAGCGTTTGTCCGGAAATGACTGGGCGTAAAGGGAGGTAGGCGGCTTGCAAGTTAGATGTGAAAAGCC  
GCAGCTCAACTGCGGAAGTGCATCTAAAAGTGTGAGGCTTGAGTGCAGGAGAGGTAAGTGGAAATTCCTAGTGTAGCGGTG  
GAATGCGTAGATATTAGGAGGAACACCGAGGCGAAGGCAGCTTACTGGACTGTAACGACGCTGAGGCTCGAAAGCGTG  
GGGAG  
>ASV:3873:Family:Lachnospiraceae  
TACGTATGGAGCAAGCGTTTATCCGGATTTACTGGGTGTAAGGGAGCGCAGGCGGTACGGCAAGTCTGATGTGAAATCCC  
GGGGCTCAACCCGGTACTGCATTGAAAAGTGTGCGACTAGAGTGTGCGAGGGGTAAGTGGAAATTCCTAGTGTAGCGGTG  
AAATGCGTAGATATTACGCAGAACCCCGATTGCGAAGGCAGCTGCTAGGGTGCAGACAGCGTGGAGCACGAAAGCGTG  
GGTAT  
>ASV:3874:Genus:Ruminococcaceae\_NK4A214\_group  
AACGTAGGGTGAAGCGTTTGTCCGGATTTACTGGGTGTAAGGGTGCAGTGGCGGCTTTGCAAGTCAGATGTGAAATCTA  
TGGGCTCAACCCATAAACTGCATTTGAAACTGTTATTTCTTGAGTGTGCGAGAGGTTGACGGAATTCCTAGTGTAGCGGTG  
AAATGCGTAGATATTAGGAGGAACACCGAGTGGCGAAGGCAGTCAACTGGACGATAACTGACGCTGAGGCGCGAAAGCGTG  
GGGAG  
>ASV:3875:Family:Ruminococcaceae  
AACGTAGGTCAACAGCGTTTGTCCGGATTTACTGGGTGTAAGGGAGCGCAGGCGGGAAGACAAGTTGGAAGTAAAATCTA  
TGGGCTTAACCCATAAACTGCTTTTAAAAGTGTCTTCTTGAGTATCGGAGAGGCGAGCGGGAATTCCTAGTGTAGCGGTG  
AAATGCGTAGATATTAGGAGGAACACCGAGTGGCGAAGGCAGCTGCGAGGACGACAAGTACGCTGAGGCGCGAAAGCGTG  
GGGAG  
>ASV:3876:Genus:GCA-900066755  
TACGTAGGGAGCGAGCGTTTGTCCGGATTTACTGGGTGTAAGGGAGCGTAGACGGAGCAGCAAGTCTGATGTGAAAAGCC  
GGGGCTCAACCCGGGACTGCATTGAAAAGTGTGATCTGGAGTGCAGGAGGTAAGCGGAATTCCTAGTGTAGCGGTG  
AAATGCTTAGATATCACGAAGAACTCCGATTGCGAAGGCAGCTCACTGGACTGCAACTGACACTGATGCTCGAAAGTGTG  
GGTAT  
>ASV:3877:Family:Ruminococcaceae  
TACGTAGGGAGCAAGCGTTTATCCGGATTTATTGGGTGTAAGGGTGCAGTGGAGGAAAGCAAGTTAGTTGTGAAATCCC  
TCGGCTTAACCTGAGGAACTGCAACTAAAAGTGTCTTCTTGAGTGTGCGAGAGGAAAGTGGAAATTCCTAGTGTAGCGGTG  
GAGTGCAGATATTGGGAAGAGCACCGATGGCGAAGGCAGCTTCTGGGCCATTACTGACGCTGAGGTGCGAAAGCTAG  
GGGAG  
>ASV:3878:Phylum:Firmicutes  
TACGTAGGGGGCAAGCGTTTGTCCGGAAATAATTGGGCGTAAAGGGCGCGTAAGCGGCTCGGTAAGTCTGGAGTAAAAGTCC  
TGCTTTTAAAGTGGGAATTGCTTTGGATACTGTCGGGCTTGAGTGCAGGAGAGGTTAGTGGAAATTCGTGGTGTAGCGGTG  
AAATGCTTAGATATCACGAAGAACTCCGATTGCGAAGGCAGCTGCTAAGCTGCAACTGACATTGAGGCTCGAAAGTGTG  
GGTAT  
>ASV:3879:Family:Lachnospiraceae  
TACGTAGGGGGCAAGCGTTTATCCGGATTTACTGGGTGTAAGGGAGCGTAGACGGACTGGCAAGTCTGATGTGAAAAGCGC

GGGGCTCAACCCCTGGACTGCATTTGAACTGTCGTTCTTGTAGTATCGGAGAGGCAAGCGGAATTCCTAGTGTAGCGGTG  
AAATGCTTAGATATCACGAAGAACTCCGATCGCAAGGCATTGTGCCGGGCATAACTGACGCTGAGGCTCGAAAGTGCG  
GGTAT

>ASV:3880:Family:Christensenellaceae

TACGTAGGGAGCAAGCGTTGTCCGGAATTACTGGGCGTAAAGGGTGCCTAGGCGGCGCAGTTAGTCAGAAGTAAAATATC  
GGGGCTTAACCCCGGGGCTGCTTCTGATACTGCTGTCTCGAGTGCAGGAGAGGTAAGTGAATTCCTAGTGTAGCGGTG  
AAATGCGTAGATATTAGGAGGAACACCAGTGGCGAAGGCGGCTTGTGGACGATGACTGACGTTGAGGCTCGAAAGCGTG  
GGGAG

>ASV:3881:Order:Bacteroidales

TACGGAGGATCCGAGCGTTATCCGGATTTATTGGGTTTAAAGGGAGCGTAGGCGGACGCTTAAGTCAGTTGTGAAAGTTT  
GCGGCTCAACCGTAAAATTGCAGTTGATACTGGGTGTCTTGTAGTGCAGGAGAGGTTAGTGAATTCCTAGTGTAGCGGTG  
AAATGCGTAGAGATCGGGAGGAACACCAGTGGCGAAGGCGGCTACTGGGCACCAACTGACGCTGAGGCTCGAAAGTGTG  
GGTAG

>ASV:3882:Genus:Intestinibacter

TACGTAGGGGCTAGCGTTATCCGGATTTACTGGGCGTAAAGGGTGCCTAGGCGGCTTTTTAAGTCAGGAGTAAAAGGCT  
ACGGCTCAACCGTAGTAAGCTCTTGAAGTGGAGGACTTGTAGTGCAGGAGAGGAGAGTGAATTCCTAGTGTAGCGGTG  
AATGCGTAGATATTGGGAGGAACACCAGTGGCGAAGGCGGCTTACTGGACGATGACTGACGTTGAGGCTCGAAAGTGTG  
GTATC

>ASV:3883:Family:Lachnospiraceae

TACGTATGGTGAAGCGTTATCCGGATTTACTGGGTGTAAGGGAGCGCAGGCGGTGCGGCAAGTCTGATGTGAAAGCCC  
GGGGCTCAACCCCGGGACTGCTTTTGAAGTGCAGGGCTAGAGTGCAGGAGGGGCAAGTGAATTCCTAGTGTAGCGGTG  
AAATGCGTAGATATTAGGAGGAACACCAGTGGCGAAGGCGGTCAACTGGACGATAACTGACGCTGAGGCGGAAAGCGTG  
GGGAG

>ASV:3884:Genus:Anaerostipes

TACGTAGGGGGCAAGCGTTATCCGGATTTACTGGGTGTAAGGGTGCCTAGGTTGGCATGGTAAGTCAGAAGTAAAAGCCC  
GGGGCTTAACCCGCGACTGCTTTTGAAGTGTCTGCTGGAGTGCAGGAGAGGTAAGCGGAATTCCTAGTGTAGCGGTG  
AAATGCGTAGATATTAGGAGGAACACCAGTGGCGAAGGCGGCTTACTGGACTGTCACTGACACTGATGCACGAAAGCGTG  
GGGAG

>ASV:3885:Genus:Lachnospiraceae\_UCG-010

TACGTAGGGGGCGAGCGTTATCCGGATTTACTGGGTGTAAGGGAGCGTAGGCGGCATGGTAAGTAAGTGTGAAAGCCC  
GCAGCTTAACCTGCGAGGATTGCATTTAAACTATCAAGCTAGAGTACAGGAGAGGAAAGCGGAATTCCTAGTGTAGCGGT  
GAAATGCGTAGATATTAGGAAGAACACCAGTGGCGAAGGCGGCTTTCTGGACTGAAACTGACGCTGAGGCTCGAAAGCGT  
GGGGA

>ASV:3886:Family:Muribaculaceae

TACGGAGGATGCGAGCGTTATCCGGATTTATTGGGTTTAAAGGGTGCAGGCGGCGTGTAAAGTCAGCGGTAAAATTC  
GGGGCTCAACCCCGCGAGCGGTTGAAACTGGCATGTAGAGTGGGCGAGAAGTATGCGGAATGCGTGGTGTAGCGGTGA  
AATGCATAGATATCACGAAGAACTCCGATTGCGAAGGCGAGCTTGTGGACTGTAAGTACGCTGATGCTCGAAAGTGTG  
GTATC

>ASV:3887:Genus:Dialister

AACGTAGGTACAAGCGTTGTCCGGAATTTATTGGGCGTAAAGCGCGCAGGCGGCTTCCCAAGTCCCTCTTAAAAGTGC  
GGGGCTTAACCCCGTGTAGGGAAGGAAACTGGGAAGCTGGAGTATCGGAGAGGAAAGTGAATTCCTAGTGTAGCGGTGA  
AATGCGTAGAGATTAGGAAGAACACCAGTGGCGAAGGCGGCTTACTGGACGTTAACTGACGTTGAGGCTCGAAAGCGTG  
GGAGC

>ASV:3888:Family:Ruminococcaceae

TACGTAGGTGGCAAGCGTTGTCCGGAATTTACTGGGTGTAAGGGAGCGTAGGCGGGAAGACAAGTCCGGTGTAAAATCTA  
TCGGCTCAACTGGTAGCAGCACTCGAAACTGCCTTTCTTGTAGTGAAGTAGAGGTAAGCGGAATTCCTAGTGTAGCGGTGA  
AATGCGTAAATATTAGGAGGAACACCAGTGGCGAAGGCGGCTTACTGGGCTTTAACTGACGCTGAGGCTCGAAAGCATG  
GTAGC

>ASV:3889:Genus:UC5-1-2E3

TACGTAGGGGGCAAGCGTTATCCGGATTTACTGGGTGTAAGGGAGCGTAGACGGCACAGCAAGTCTGAAGTAAAATCCC  
CGGGCTCAACCCGGGAACTGCTTTGAAACTGTTGGGCTGGAGTGTGGAGAGGCAAGCGGAATTCCTAGTGTAGCGGTG  
AAATGCGTAGATATTAGGAGGAACACCAGTGGCGAAGGCGACCTACTGGGCACCAACTGACGCTGAGGCTCGAAAGCATG  
GGTAG

>ASV:3890:Genus:Ruminiclostridium\_9

TACGTAGGGAGCAAGCGTTATCCGGATTTACTGGGTGTAAGGGCGTGTAGGCGGGACAGCAAGTCAGATGTGAAAACCTA  
TGGGCTCAACCCATAGCCTGCATTTGAAACTGTTGTTCTTGTAGTGTGGAGAGGCAATGGAATTCCTAGTGTAGCGGTG  
AGATGCGTAGATATTAGGAAGAACACCAGTGGCGAAGGCGATTTGCTGGACAGTAAGTACGCTGATGCGGAAAGTGTG  
GGGAG

>ASV:3891:Family:Ruminococcaceae

TACGTAGGTGGCAAGCGCTGTCCGGAATTTACTGGGTGTAAGGGAGCGTAGGCGGGAGTGAAGTCCGGCTGTCTAAACTA  
TGGGCTCAACCCATAATCGCGGCCGAAACTGTACTTCTTGTAGTGAAGTAGAGGTAAGCGGAATTCCTAGTGTAGCGGTGA  
AATGCGTAAATATTAGGAGGAACACCAGTGGCGAAGGCGGCTTACTGGGCTTTAACTGACGCTGAGGCTCGAAAGCGTGG  
GTAGC

>ASV:3892:Family:Lachnospiraceae

TACGTAGGGGGCAAGCGTTATCCGGATTTACTGGGTGTAAGGGAGCGTAGACGGCGAAGCAAGTCAGAAGTAAAACCC  
CGGGCTTAACCCGGGACTGCTTTTGAAGTGTGGCTAGAGTGCAGGAGAGGTAAGTGAATTCCTAGTGTAGCGGTG  
AAATGCGTAGATATTAGGAGGAACACCAGTGGCGAAGGCGGCTTACTGGACTGTAAGTACGCTGAGGCTCGAAAGCGTG  
GGGAG

>ASV:3893:Family:Ruminococcaceae  
TACGTAGGTGGCAAGCGTTGTCCGGAATTACTGGGTGTAAAGGGCGTGTAGGCGGGACTTTAAGTCAGATGTGAAATACCGGGCTTAACCTCGGGAGGTGCATTTGAAACTGAGGTTCTTGAGTGCAGGAGAGGAAAGCGGAATTCCTAGTGTAGCGGTGAAATGCGTAGATATTAGGAGGAACACCAGTGGCGGAGGCGGCTTTCTGGACTGTAACGTACGCTGAGGCGCAAAGCGTGGGAG

>ASV:3894:Genus:Ruminiclostridium\_5  
TACGTAGGGAGCAAGCGTTGTCCGATTTACTGGGTGTAAAGGGTGCCTAGGCGGCAAAGCAAGTCAGGCGTGAATCTGAGGGCTTAACCTCAAACTCGATTGCAATTTGAACTGTTTTGCTTGAGTGAAGTAGAGGTAGGCGGAATTCCTGGTGTAGCGGTGAAATGCGTAGAGATCGGGAGGAACACCAGTGGCGAAGGCGGCTACTGGGCTTTAACTGACGCTGAAGCACGAAAGCATGGTAG

>ASV:3895:Genus:Lachnospiraceae\_UCG-010  
TACGTAGGGGGCAAGCGTTATCCGGAATTACTGGGTGTAAAGGGAGCGTAAGCGGCATGGTAAGTAAGATGTGAAAGCCCAGGGCTTAACCTCGAGGATTGCAATTTAACTATCAAGCTAGAGTACAGGAGAGGAAAGCGGAATTCCTAGTGTAGCGGTGAAATGCGTAGATATTAGGAAGAACCAGTGGCGAAGGCGGCTTTCTGGACTGAAACTGACGCTGAGGCTCGAAAGCGTGGGA

>ASV:3896:Genus:Eisenbergiella  
TACGTAGGGAGCAAGCGTTATCCGATTTACTGGGTGTAAAGGGAGCGTAGACGGCATGGCAAGCCAGATGTGAAAACCCAGGGCTCAACCTGGGAACCTGCAGTGGATACTGGACACTAGAGTGTGGTAGAGGGTAGCGGAATTCCTGGTGTAGCGGTGAAATGCGTAGAGATCGGTAGGAACACCAGTGGCGAAGGCGGCTTTCTGGACTGAAACTGACGCTGAGGCGCAAAGCGTGGGAG

>ASV:3897:Genus:Stenotrophomonas  
TACGAAGGGTGCAGCGTTACTCGGAATTACTGGGCGTAAAGCGTGCCTAGGTGGTGGTTAAGTCCGTTGTGAAAGCCCAGGGCTCAACCTGGGAACCTGCAGTGGATACTGGACACTAGAGTGTGGTAGAGGGTAGCGGAATTCCTGGTGTAGCGGTGAAATGCGTAGAGATCAGGAGGAACATCCATGGCGAAGGCGACTACCTGGACCAACACTGACACTGAGGCACGAAAGCGTGGGAG

>ASV:3898:Family:Ruminococcaceae  
TACGTAGGGAGCGAGCGTTGTCCGGAATTACTGGGTGTAAAGGGAGCGTAGGCGGGATGGCAAGTCAGATGTGAAACCTGAGGGCTCAACCTGGGAACCTGCAGTGGATACTGGACACTAGAGTGTGGTAGAGGGTAGCGGAATTCCTGGTGTAGCGGTGAAATGCGTAGAGATCACGAAGAACCAGTGGCGAAGGCGGCTGCTAAGCTGCAACTGACATTGAGGCTCGAAAGTGTGGTAT

>ASV:3899:Genus:Copro bacter  
TACGGAGGATCCGAGCGTTATCCGATTTATTGGGTTTAAAGGGTGCCTAGGCGGCCCTATAAGTCAGCGGTGAAAATTTCCGGCTCAACCCGAAAGTGCCTTTGAAACTGTAGAGCTAGAGTACACAAGAGGTATGCGGAATGCGTGGTGTAGCGGTGAAATGCGTAGATATCACGCAGAACCCGATTGCGAAGGCGAGCTACTGGGGTAAACAGACGCTGAAGCACGAAAGCGTGGTAT

>ASV:3900:Family:Lachnospiraceae  
AACGTAGGGTGCAGCGTTATCCGATTTACTGGGTGTAAAGGGAGCGTAGGTGGCAAGGCAAGCCAGAAGTGA AAAACCCGGGGCTCAACCCGCGGATTGCTTTTGGAACTGTCATGCTAGAGTGCAGGAGGGGTGAGCGGAATTCCTAGTGTAGCGGTGAAATGCGTAGATATTAGGAGGAACACCAGTGGCGAAGGCGGCTTTCTGGACGACAACGTACGCTGAGGCGCAAAGTGTGGGAG

>ASV:3901:Family:Muribaculaceae  
TACGGAGGATCGAGCGTTATCCGATTTATTGGGTTTAAAGGGTGCCTAGGCGGCTCTTAAAGTAAGCGGTGAAAATCGCGGGCTCAACCCGCGGAGCGGTTAGACTGGGGACTTGAGACGGCGAGAAGTACGCGGAATGCGCGGTGTAGCGGTGA AATGCATAGATATCGCGAGAACCAGTGGCGAAGGCGAGCTACCGGTGCCGTTCTGACGCTGAGGCACGAAAGCGTGGGATC

>ASV:3902:Genus:Tyzzerella  
TACGTAGGGGGCAAGCGTTATCCGGAATTACTGGGTGTAAAGGGAGCGTAGGCGGCATGATAAGCCAGATGTGAAAGCCCAGAGCTTAACCTCGAGGATTGCATTTGAACTATCAAGCTAGAGTACAGGAGAGGAAAGCGGAATTCCTAGTGTAGCGGTGAAATGCGTAGATATTAGGAAGAACCAGTGGCGAAGGCGGCTTTCTGGACTGAAACTGACGCTGAGGCTCGAAAGCGTGGGA

>ASV:3903:Genus:Phascolarctobacterium  
TACGTAGGTGGCGAGCGTTGTCCGGAATTATTGGGCGTAAAGAGTATGTAGGCGGCTTAATAAGTCGAGCGTGA AAAATGCGGGCTCAACCCGATGCGCTGGA AACTGTTAGGCTTGAGTGCAGGAGAGGAAAGGGGAATTC CAGTGTAGCGGTGA AATGCGTAGATATATGGAAGAACCAGTGGCGAAGGCGAGCCCTCTGGGACATGACTGACGCTCATGCACGAAAGCGTGGGAAC

>ASV:3904:Family:Veillonellaceae  
TACGTATGGTGCAGCGTTATCCGATTTATTGGGCGTAAAGCGCGCAGGCGGCTTCTTAAAGTCCATCTTAAAAGTGC GGGCTTAACCCGATGAGGATGGA AACTGGGAGGCTGGAGTATCGGAGAGGAAAGTGA AATTCCTAGTGTAGCGGTGA AATGCTTAGATATCACGAAGAACCAGTGGCGAAGGCGAGCTACTGGAGCGCAACTGACGCTGAAGCTCGAAAGTGGG GTATC

>ASV:3905:Genus:Anaerococcus  
TACGTATGGACCGAGCGTTGTCCGGAATCATTGGGCGTAAAGGGTACGTAGGCGGCTAGTAAGTTAGAAGTGA AAGAATAGCTCAACTATATAAAGCTTTTAAACTGCTAGGCTTGAGAGATGGAAGGAAAGTGA AATTCCTAGTGTAGCGGTGA AATGCGCAGATATTAGGAAGAATACCGGTGGCGAAGGCGACTTTCTGGTTCATCATCTGACGCTGAGGTACGAAAGCGTGGGTAGC

>ASV:3906:Species:hani/koreensis  
TACGTATGTTCCAGCGTTATCCGATTTATTGGGCGTAAAGCGAGCGCAGACGTTATTTAAGTCTGAAGTGA AAGCCCAGGGCTCAACCGAGGAATTCCTTTGAAACTGGATAACTTGAGTGCAGTAGAGGAAAGTGA AACTCCATGTGTAGCGGTG



AAATGCGTAGATATATGGAAGAACCACAGTGGCGAAGGCGGCTTTCTGGACTGTAACGACGTTGAGGCTCGAAAGTGTG  
GGTAG  
>ASV:3907:Genus:Blautia  
TACGTAGGGGGCAAGCGTTATCCGGATTTACTGGGTGTAAGGGAGCGTAGACGGCATAACAAGTCTGATGTGAAAGGCT  
GGGGCTTAACCCGGGACTGCATTGAAAAGTGAAGCTTGGAGTCCGGAGGGGTAAGCGGAATTCCTAGTGTAGCGGTG  
AAATGCGTAGATATTAGGAGGAACCACAGTGGCGAAGGCGGCTTACTGGACGTTAAGTACGCTTGGAGGCTCGAAAGTGTG  
GGTAT  
>ASV:3908:Phylum:Bacteroidetes  
TACGTATGGTCAAGCGTTATCCGGATTTACTGGGTGTAAGGGAGCGTAGACGGATGGACAAGTCTGATGTGAAAGGCT  
GGGGCTCAACCCGGGACTGCATTGAAAAGTCCCGTCTTGGAGTACAGTAGAGGTGGCGGAATTCGTGGTGTAGCGGTG  
AAATGCTTAGATATACGAAGAAGTCCGATTGCGAAGGCAGCTTCTGGACTGTAACGACGCTGATGCTCGAAAGTGTG  
GGTAT  
>ASV:3909:Genus:Ruminiclostridium\_5  
TACGTAGGGAGCAAGCGTTGTCGGATTTACTGGGTGTAAGGGTGCCTAGGCGGCTAGGCAAGTCAAGCTGAAAACCA  
TGGGCTCAACCTGTGGACTGCGTTTAAAAGTGTAGCTTGGAGTGAAGTAGAGGTAGCGGAATTCGTGGTGTAGCGGTG  
AAATGCTTAGATATACGAAGAAGTCCGATTGCGAAGGCAGCTTCTAAGCTGCAACCGACATTGAGGCTCGAAAGTGTG  
GGTAT  
>ASV:3910:Family:Ruminococcaceae  
TACGGAGGATCCGAGCGTTATCCGGATTTATTGGGTTTAAAGGGAGCGTAGATGGGAAGACAAGTTGGAAGTAAAACCA  
TGGGCTCAACCCATGAATTGCTTTCAAAGTGTCTTGGAGTAGTGCAGAGGTAGATGGAATTCCTGGTGTAGCGGTG  
GAATGCGTAGATATCGGGAGGAACCACAGTGGCGAAGGCGGCTTACTGGACGTTAAGTACGCTTGGAGGCTCGAAAGCGTG  
GGAG  
>ASV:3911:Genus:Sellimonas  
TACGTATGGTCAAGCGTTATCCGGATCTACTGGGTGTAAGGGAGCGTAGACGGATAGGCAAGTCTGGAGTAAAACCC  
AGGGCTCAACCTGGGACTGCTTTGAAAAGTGCAGATCTGGAGTCCGGAGGGTAAGCGGAATTCCTAGTGTAGCGGTG  
AAATGCGTAGATATTAGGAGGAACCACAGTGGCGAAGGCGGCTTACTGGACGGTACTGACGTTGAGGCTCGAAAGCGTG  
GGAG  
>ASV:3912:Family:Lachnospiraceae  
TACGTAGGATCCGAGCGTTATCCGGATCTATTGGGTGTAAGGGAGCGCAGGCGGTGCGGCAAGTCTGATGTGAAAGCCC  
GGGGCTCAACCCGGTACTGCATTGAAAAGTGTCTACTAGAGTGTGCGAGGGGTAAGCGGAATTCCTAGTGTAGCGGTG  
AAATGCGTAGATATACGAAGGACTCCGATTGCGAAGGCAGCTCACTAGACTGCAACTGACACTGATGCTCGAAAGTGTG  
GGTAT  
>ASV:3913:Genus:Caproiciproducens  
TACGTAGGGAGCAAGCGTTGTCGGATTTACTGGGTGTAAGGGTGCCTAGGCGGCTATGCAAGTCAAGTGTGAAAACCA  
TGGGCTCAACCCATAGCCTGCAATTGAAAAGTGCCTGCTTGGAGTGAAGTAGAGGTAGGTGGAATTCCTGGTGTAGCGGTG  
AAATGCGTAGAGATCGGGAGGAACCACAGTGGCGAAGGCGACCTACTGGGCTTAACTGACGCTGAGGCACGAAAGCATG  
GGTAG  
>ASV:3914:Family:Ruminococcaceae  
TACGTAGGGAGCAAGCGTTGTCGGATTTACTGGGTGTAAGGGCGGTAGCCGGGAGGGCAAGTCAAGTGTGAAATCCA  
CGGGCTTAACTCGTGAAGTGCATTTGAAAAGTCTTCTTGGAGTATCGGAGAGGCAATCGGAATTCCTAGTGTAGCGGTG  
AAATGCGTAGATATTGGGAGGAACCACAGTGGCGAAGGCGCCTTCTGGACTGTGCTGACGCTGAGATGCGAAAGCCAG  
GGTAG  
>ASV:3915:Family:Ruminococcaceae  
TACGTAGGTGGCAAGCGTTGTCGGAATTACTGGGTGTAAGGGAGCGTAGGCGGGATGCCAAGTCCGCTGTGAAAACCA  
TGGGCTTAACTGTAGACTGCGGTTGAAAAGTGGTATCTTGGAGTGAAGTAGAGGTGGCGGAATTCCTAGTGTAGCGGTG  
AAATGCTTAGATATCATGAAGAAGTCCGATCGCGAAGGCATATGTCGGAGTGAAGTACGCTGAGGCTCGAAAGTGTG  
GGTAT  
>ASV:3916:Genus:UC5-1-2E3  
TACGTAGGTGGCAAGCGTTGTCGGAATTATTGGGCGTAAAGCGCGCAGGCGGCTTCCCAAGTCCCTCTTAAAAGCCC  
GGGGCTCAACCCGGGACTGCTTTGAAAAGTGTAAACCAGAGTGTGGAGAGGTAAGCGGAATTCCTAGTGTAGCGGTG  
AAATGCGTAGATATTAGGAGGAACCACAGTGGCGAAGGCGGCTTACTGGACAGTAACTGACGTTGAGGCTCGAAAGCGTG  
GGGAG  
>ASV:3917:Family:Bifidobacteriaceae  
TACGGAGGATCCGAGCGTTATCCGGAATTATTGGGCGTAAAGGGCTCGTAGGCGGTTCTGCGCTCCGGTGTGAAAAGTCC  
ATCGCTTAAACGGTGGATCCGCGCCGGGTACGGGCGGCTTGGAGTGGGTAGGGGAGACTGGAATTCCTGGTGTAAACGGTG  
GAATGTGTAGATATACGAAGAAGTCCGATTGCGAAGGCAGCTTCTGGACTGTAACGACGCTGATGCTCGAAAGTGTG  
GGTAT  
>ASV:3918:Genus:Fusicatenibacter  
TACGTAGGGAGCGAGCGTTGTCGGAATTACTGGGTGTAAGGGAGCGTAGACGGCAAGGCAAGTCTGATGTGAAAACCC  
AGGGCTTAAACCTGGGACTGCATTGAAAAGTGTCTGGCTCGAGTCCGGAGAGGCAAGCGGAATTCCTAGTGTAGCGGTG  
AAATGCGTAGATATTAGGAGGAACCACAGTGGCGAAGGCGGCTTCTGGACATTAAGTACGCTGAGGCGGAAAGCGTG  
GGGAG  
>ASV:3919:Family:Ruminococcaceae  
TACGTAGGGAGCAAGCGTTGTCGGATTTACTGGGTGTAAGGGTGCCTAGGCGGGAACGCAAGTCAAGCGTAAAATACC  
GGGGCTCAACCTCCGGGCTGCGCTTAAAAGTGTCTTGGAGTGAAGTAGAGGTAAAGCGGAATTCCTAGTGTAGCGGTG  
AAATGCGTAGATATTAGGAGGAACATCAGTGGCGAAGGCGGCTTACTGGGCTTAACTGACGCTGAGGCTCGAAAGCGTG  
GGGAG  
>ASV:3920:Order:Bacteroidales

TACGGAGGATCCGAGCGTTATCCGGATTTATTGGGTTAAAGGGAGCGTAGATGGATTTTAAAGTCAGTTGTGAAAAGTTT  
GCGGCTCAACCGTAAAATTGCAAGTTGATACTGGATATCTTGAGTGCAGTTGAGGCAATCGGAATTCCTAGTGTAGCGGTG  
AAATGCGTAGATATTAGGAGGAACACCAGTGGCGAAGGCGGATTGCTGGACGACAACGACGGTGAGGCGCGAAAAGCGTG  
GGGAG

>ASV:3921:Genus:Erysipelotrichaceae\_UCG-004

TACGTAGGTGGCAAGCGTTATCCGGAATTATTGGGCGTAAAGAGAGAGCAGGCGGTTATTCAAGTCTGAAGTAAAAAGCA  
GTGGCTTAACCAATTGTAGGCTTTGAAACTAGATAGCTAGAGTGAAGAGAGGTTAGCGGAACTCCATGTGTAGCGGTGA  
AATGCGTAGATATATGGAAGAACACCAGTGGCGAAGGCGGCTAACTAGCTTGAAGTACGCTCAGTCTCGAAAAGCGTGG  
GTAGC

>ASV:3922:Family:Ruminococcaceae

TACGTAGGGAGCGAGCGTTGTCCGGAATTACTGGGTGTAAGGGAGCGCAGGCGGACCGGCAAGTTGGAAGTAAAACTA  
TGGGCTCAACCCATAAATTGCTTTCAAAGTCTGGCCTTGAAGTGTGAGAGGTAAGCGGAATTCCTAGTGTAGCGGTG  
AAATGCGTAGATATTAGGAGGAACATCAGTGGCGAAGGCGGCTTACTGGACTGAAACTGACACTGAGGCACGAAAAGCGTG  
GGGAG

>ASV:3923:Species:animalis/apodemi/crispatus/faecis/murinus

TACGTAGGTGGCAAGCGTTATCCGGATTTATTGGGCGTAAAGGGAACGAGGCGGCTTTTAAAGTCTGATGTGAAAAGCCT  
TCGGCTTAACCGGAGTAGTGCATTGAAACTGGGAGACTTGAAGTGCAGAAGAGGAGAGTGGAACTCCATGTGTAGCGGTG  
AAATGCGTAGATATATGGAAGAACACCAGTGGCGAAGGCGGCTCTCTGGTCTGTAACGACGCTGAGGTTTCAAAGCGTG  
GGTAG

>ASV:3924:Genus:Intestinimonas

TACGTAGGTGGCAAGCGTTATCCGGATTTACTGGGTGTAAGGGCGTGTAGGCGGGAAAGCAAGTCAAGGCGTAAAACTA  
TGGGCTCAACCCATAGCCTGCGTTTGAAGTGTCTTCTTGAAGTGTGAGAGGCAATCGGAATTCCTGTGTAGCGGTG  
AAATGCGTAGATATATGGAAGAACACCAGTGGCGAAGGCGGCTTGGCCTGTAACGACGCTCATTCCGAAAAGCGTG  
GGGAG

>ASV:3925:Genus:Leptotrichia

TACGTATGTCGCAAGCGTTATCCGGAATTATTGGGCATAAAGGGCATCTAGGCGGCCAGATAAGTCTGGGGTAAAACTT  
GCGGCTCAACCGCAAGCCTGCCCTGAAACTATGTGGCTAGAGTACTGGAGAGGTGGACGGAAGTGCACGAGTAGAGGTG  
AAATTCGTAGATATGTGCAGGAATGCCGATGATGAAGATAGTTCACTGGACGTAACGACGCTGAAGTGCAAAAGCTAG  
GGGAG

>ASV:3926:Genus:Moryella

TACGTAGGGGGCAAGCGTTATCCGGATTTACTGGGTGTAAGGGAGCGCAGACGGCTTGGAAGTCTGAAGTAAAAGCCC  
GGGGCTTAACCCGGGACTGCTTTGAAACTGTGAAGCTAGAGTGTGAGAGGTAAGTGGAAATTCCTAGTGTAGCGGTG  
AAATGCGTAGATATTGGGAGGAACACCAGTGGCGAAGGCGGCTTACTGGACGATAAAGTACGCTTGAAGTGCAAAAGCGTG  
GGGAG

>ASV:3927:Genus:Barnesiella

TACGTATGGTGAAGCGTTATCCGGATTTATTGGGTTAAAGGGTGCAGTGGCGGCACGCCAAGTCAAGCGGTGAAATTTT  
CGGGCTCAACCCGGACTGCTTTGAAACTGTGAAGCTAGAGTGTGAGAGGTAAGCGGAATTCCTAGTGTAGCGGTG  
AAATGCGTAGATATCTGGAAGAACACCAGGCGAAGGCGAGTCTCTGGGCAAACTGACGCTCATATGCAAAGCGTG  
GGTAG

>ASV:3928:Genus:Oscillospira

TACGTAGGTGGCAAGCGTTGTCCGGATTTACTGGGTGTAAGGGCGTGTAGCCGGGAGACAAGTCAAGTGTGAAATCTG  
GAGGCTCAACCTCAAAGTGCATTTGAAACTGTTTCTTGGAGTATCGGAGAGGTAAGCGGAATTCCTAGTGTAGCGGTG  
AAATGCGTAGATATTAGGAGGAACATCAGTGGCGAAGGCGGCTTACTGGACTGAAACTGACACTGAGGCACGAAAAGCGTG  
GGGAG

>ASV:3929:Genus:Ruminococcaceae\_UCG-014

TACGTAGGGAGCAAGCGTTATCCGGATTTATTGGGTGTAAGGGTGCAGTGGGAAATTTAAGTTAGTTGTGAAAAGCCC  
TCGGCTTAACCTGAGGAACTGCAACTGAAACTGGATTTCTTGGAGTGTGAGAGGAAAGCGGAATTCCTAGTGTAGCGGTG  
AAATGCGTAGAGATTAGGAAGAACACCAGTGGCGAAGGCGACTTTCTGGACGAAAAGTACGCTGAGGCGCGAAAAGCGTG  
GGGAG

>ASV:3930:Genus:Alistipes

TACGGAGGATCCGAGCGTTATCCGGATTTATTGGGTTAAAGGGTGCAGTGGCGGTTTGATAAGTTAGAGGTGAAATTTT  
GGGGCTCAACCTGAACGTGCTTAATACTGTTGAGCTAGAGAGTGTGCGGTAGGCGGAATGTATGGTGTAGCGGTG  
AAATGCTTAGATATCACGAAGAACTCCGATTGCGAAGGCGACTTACTGGACGACAACGACGCTGAGGCGCGAAAAGCGTG  
GGGAG

>ASV:3931:Family:Ruminococcaceae

TACGTAGGTGGCAAGCGTTATCCGGATTTACTGGGTGTAAGGGCGTGTAGGCGGAAAGGCAAGTCAAGTGTGAAAAGT  
TGGGCTCAACCCATAGCCTGCATTTGAAACTGTTTTCTTGAAGTGTGAGAGGCAATCGGAATTCCTAGTGTAGCGGTG  
AAATGCTTAGATATCACGAGGAGCTCCGATTGCGAAGGCGACTTCTGAGCTGCAACTGACATTGAGGCTCGAAAAGTGTG  
GGTAT

>ASV:3932:Genus:Megasphaera

TACGTAGGTGGCAAGCGTTGTCCGGAATTATTGGGCGTAAAGGGCGCGCAGGCGGCGTTCGAAAGTGTGAAAAGTGC  
GGGGCTTAACCCCGTAGGGGACCGAAACTGTGAAGCTCAGTGTGAGAGGAAAGCGGAATTCCTAGTGTAGCGGTG  
AATGCTTAGATATCACGAAGAACTCCGATTGCGAAGGCGACTTCTGAGCTGCAACTGACATTGAGGCTCGAAAAGTGTG  
GTATC

>ASV:3933:Genus:Lactobacillus

TACGTAGGTGGCGAGCGTTGTCCGGATTTATTGGGCGTAAAGCGAGCGCAGGCGGAATGATAAGTCTGATGTGAAAAGCCC  
ACGGCTCAACCGTGAAGTGCATCGGAAACTGTCTTCTTGAAGTGTGAGAGGAAAGCGGAATTCCTAGTGTAGCGGTG  
GAATGCGTAGATATATGGAAGAACACCAGTGGCGAAGGCGGCTCTCTGGTCTGCAACTGACGCTGAGGCTCGAAAAGCATG

GGTAG  
>ASV:3934:Class:Bacteroidia  
TACGGAGGATCCGAGCGTTATCCGGATTTATTGGGTTTAAAGGGAGCGTAGGTGGATTGTTAAGTCAGTTGTGAAAATTT  
GCGGCTCAACCGTAAAATTGCAGTTGAAACTGTTGTTCTTGAGTGAAGTAGAGGTAAGCGGAATTCCTAGTGTAGCGGTG  
AAATGCGTAGATATTAGGAGGAACATCGGTGGCGAAGGCGGCTTACTGGCTTTTACTGACGCTGAGGCTCGAAAGCATG  
GGTG  
>ASV:3935:Family:Peptostreptococaceae  
TACGTAGGGGCTAGCTATCCGGAATTACTGGGCGTAAAGGGTGCCTAGGTGGTTTCTTAAGTCAGAGGTGAAAGGCT  
ACGGCTCAACCGTAGTAAGCCTTTGAAACTGGGAACTGAGTGCAGGAGAGGAGAGTGAATTCCTAGTGTAGCGGTGA  
AATGCGTAGATATTAGGAGGAACACCACTGGCGAAGGCGGCTTACTGGACGATTACTGACGCTGAGGCTCGAAAGCGTGG  
GGAG  
>ASV:3936:Order:Clostridiales  
TACGGAGGATCAAGCGTTATCCGGATTTATTGGGTTTAAAGGGAGCGTAGGTGGATTGTTAAGTCAGTTGTGAAAATTT  
GCGGCTCAACCGTAAAATTGCAGTTGAAACTGTTTCTTGAGTGTGCGAGAGGTTGACGGAATTCCTAGTGTAGCGGTG  
AAATGCGTAGATATTAGGAGGAACACCACTGGCGAAGGCGGCTCAACTGGACGATAACTGACGCTGAGGCGCGAAAGCGTG  
GGAG  
>ASV:3937:Family:Lachnospiraceae  
TACGGAGGATCCGAGCGTTATCCGGATTTATTGGGTTTAAAGGGAGCGCAGGCTGCGAGGCAAGTCAGCGGTCAAATGTC  
GGGGCTCAACCCCGGACTGCTTTGAAACTGCCTTCTAGAGTGTGAGAGGTAAGTGAATTCCTAGTGTAGCGGTG  
AAATGCGTAGATATTAGGAGGAACACCACTGGCGAAGGCGGCTTACTGGACAGTAAGTCAGCTTGGGCTCGAAAGCGTG  
GGAG  
>ASV:3938:Family:Bacillaceae  
TACGTAGGTGGCAAGCGTTGTCCGGAATTATTGGGCGTAAAGCGCGCAGGCGGCTTTAAGTCTGATGTGAAATCTT  
GCGGCTCAACCGCAAGCGGTATTGAAACTGGGGACTTGTAGTGCAGAAAGGAAAGCGGAATTCACGCTGTAGCGGTG  
AAATGCGTAGAGATGTGGAGGAACACCACTGGCGAAGGCGGCTTCTGGTCTGTAAGTCAGCTGAGGCGCGAAAGCGTG  
GGAG  
>ASV:3939:Family:Ruminococcaceae  
TACGTAGGTGGCAAGCGTTGTCCGGAATTACTGGGTTAAAGGGAGCGTAGGCGGGAAGATAAGTTGGACGTTTAACTA  
TCGGCTCAACCGATAGTCGCTTCAAACCTGCTTTCTGAGTGAAGTAGAGGTAAGCGGAATTCCTAGTGTAGCGGTGA  
AATGCGTAAATATTAGGAGGAACACCACTGGCGAAGGCGGCTTACTGGCTTTAACTGACGCTGAGGCTCGAAAGCGTG  
GTAGC  
>ASV:3940:Genus:Bacteroides  
TACGGAGGATCCGAGCGTTATCCGGATTTATTGGGTTTAAAGGGAGCGTAGATGGATTGTTAAGTCAGTTGTGAAAATTT  
GCGGCTCAACCGTAAAATTGCAGTTGATACTGGCAGTCTTGAGTGCAGTAGAGGTGGCGGAATTCACGCTGTAGCGGTG  
AAATGCGTAGATATTGGGAAGAACACCACTGGCGAAGGCGGCTTCTGGACTGTAAGTCAGCTGAAGCTCGAAAGTGGC  
GGTAT  
>ASV:3941:Phylum:Firmicutes  
TACGTAGGTGCAAGCGTTAATCCGGAATTACTGGGCGTAAAGCGAGCGCAGGCGGTTTGATAAGTCTGAAGTTAAAGGCT  
GTGGCTCAACCATAGTTCGCTTTGAAACTGTCAAACCTGAGTGCAGAAAGGGAGAGTGAATTCATGTGTAGCGGTGA  
AATGCGTAGATATTGGGAGGAACACCACTGGCGAAGGCGGCTTCTGGACTGTGTCTGACGCTGAGATGCGAAAGCCAGG  
GTAGC  
>ASV:3942:Species:massiliensis  
TACGTATGGGGCAAGCGTTATCCGGATTTATTGGGCGTAAAGCGCGCAGGCGGGCTGTTAAGCGAAGCCTCTAATCCC  
AGGGCTCAACCTGGACCGGCTCGAACTGGCAGCCTCGAGTGAAGTAGAGGTAGATGGAATTCCTAGTGTAGCGGTGG  
AATGCGCAGATATCGGGAAGAACACCGACAGCGAAGGCGAGTCTACTGGGCTTAACTGACGCTGAGGCGCGAAAGCTGGG  
GGAGC  
>ASV:3943:Family:Lachnospiraceae  
TACGTATGGTGAAGCGTTATCCGGATTTACTGGGTGTAAGGGAGCGTAGACGGAGTGGAAGTCTGATGTGAAAACCC  
GGGGCTCAACCCCGGACTGCTTTGAAACTGTCAATCTAGAGTACCGGAGAGGTAAGCGGAATTCCTAGTGTAGCGGTG  
AAATGCGTAGATATTAGGAGGAACACCACTGGCGAAGGCGATTGCTGGGCCATTACTGACGTTGAGGACGAAAGCGTG  
GGAG  
>ASV:3944:Genus:Coprococcus\_2  
TACGTATGGTGAAGCGTTATCCGGATTTACTGGGTGTAAGGGTGCCTAGGTGACAAGGCAAGTCTGAAGTGAATCC  
GGGGCTCAACCCCGGAACTGCTTTGAAACTGTTTAGCTGGAGTACAGGAGAGGTAAGTGAATTCCTAGTGTAGCGGTG  
AAATGCTTAGATATCAGGAAGAACTCCGATTGCGAAGGCGAGCTGCTAAGCTGCAACTGACATTGAGGCTCGAAAGTGTG  
GGTAT  
>ASV:3945:Family:Prevotellaceae  
TACGGAGGATCCGAGCGTTATCCGGATTTATTGGGTTTAAAGGGAGCGCAGGCGCGGCTGCAAGCGTGCCTGAAAAGCA  
GCGGCCAACCGCTGCCTGCGGCGCAACTGCTTGGCTTGTAGTGCAGCGGAAAGCGGCGGAATTCCTAGTGTAGCGGTG  
AAATGCTTAGATATCAGGAAGAACTCCGATTGCGAAGGCGAGCTGCTAAGCTGCAACTGACATTGAGGCTCGAAAGTGTG  
GGTAT  
>ASV:3946:Genus:Ruminococcaceae\_UCG-008  
TACGTAGGGAGCGAGCGTTATCCGGATTTACTGGGTGTAAGGGCGAGTAGGCGGGCTGGTAAGTTGGAAGTGAATGTC  
GGGGCTTAAACCCCGGAACTGCTTTCAAACCTGCTTGTGAGTGTGAGAGGCGAGGCGGAATTCCTAGTGTAGCGGTG  
AAATGCGTAGATATTAGGAGGAACACCACTGGCGAAGGCGGCTGCTGGACATTAAGTCAGCTGAGGAGCGAAAGCGTG  
GGAG  
>ASV:3947:Genus:Negativibacillus  
TACGTAGGTGGCAAGCGTTGTCCGGAATTACTGGGTGTAAGGGAGCGTAGGCGGGAGACAAGTTGAATGTTAAACTA

TCGGCTCAACTGATAGTCGCGTTCAAACATCACTCTTGAGTGCAGTAGAGGTAGGCGGAATTCCTAGTGTAGCGGTGA  
AATGCTTAGATATCACGAAGAAGCTCCGATTGCGAAGGCAGCTTACTGGATTGTAAGTACGCTGATGCTCGAAAGTGTGG  
GTATC

>ASV:3948:Family:Ruminococcaceae

TACGTAGGGAGCGAGCGTTGTCCGGAATTACTGGGTGTAAGGGAGCGTAGGCGGGGACGCAAGTTGAATGTGAAATCTA  
TGGGCTCAACCCATAAACTGCATTGAAACTGTTTCTTGAGTGAAGTAGAGGTAGGCGGAATTCCTAGTGTAGCGGTG  
AAATGCGTAGATATTAGGAGGAACACCAGTGGCGAAGGCGGCTTACTGGCTTAACTGACGCTGAGGCTCGAAAGCGTG  
GGTAG

>ASV:3949:Genus:CAG-56

TACGTAGGGGGCAAGCGTTATCCGGATTTACTGGGTGTAAGGGAGCGTAGACGGCGAGGCAAGTCTGATGTGAAAGGCC  
GGGGCTCAACCCCGGACTGCATTGAAACTGTTTTGCTTGAGTGCCGGAGAGGTAAGCGGAATTCCTAGTGTAGCGGTG  
AAATGCGTAGATATTAGGAGGAACACCAGTGGCGAAGGCGGCTTACTGGACGGCAACTGACGTTGAGGCTCGAAAGCGTG  
GGGAG

>ASV:3950:Genus:Oscillibacter

TACGTAGGTGGCAAGCGTTGTCCGGAATTATTGGGCGTAAAGGGCGTGACGGCGGCGCAAGTCAAGTGTGAAATCTG  
GAGGCTTAACCTCAAACCTGCATTTGAAACTGTAGGCTTGAGTACCGGAGAGGTTATCGGAATTCCTTGTGTAGCGGTG  
AAATGCGTAGATATTAGGAGGAACACCAGTGGCGAAGGCGGCTTCTGGACGACAACGACGCTGAGGCGCGAAAGCCAG  
GGGAG

>ASV:3951:Order:Bacteroidales

TACGTAGGGGGCAAGCGTTATCCGGATTTACTGGGTGTAAGGGTGCCTAGGCGGCAGAGCAAGTCAAGTGTGAAATACA  
CGGGCTTAACCCGTGGGCTGCATTTGATACTGGTCTGCTTGAGTGCAGTAGAGGTAGGCGGAATTCGTGGTGTAGCGGTG  
AAATGCTTAGATATCACGAAGAAGCTCCGATTGCGAAGGCAGCTTACTGGACTGCAACTGACGCTGATGCTCGAAAGTGTG  
GGTAT

>ASV:3952:Family:Pasteurellaceae

TACGTATGGTCAAGCGTTATCCGGATTTACTGGGCGTAAAGGGCACGCAGGCGGTGACTTAAAGTGAAGTGTGAAAGCCC  
CGGGCTTAACCTGGGAATTGCATTTCACTAGGTCGCTAGAGTACTTTAGGGAGGGGTAGAATTCACGCTGTAGCGGTG  
AAATGCGTAGAGATGGGAGGAACACCAGTGGCGAAGGCGGCTGCTGGCTTAACTGACGCTGAGGCACGAAAGCGTG  
GGTAG

>ASV:3953:Phylum:Firmicutes

TACGTAGGGGGCAAGCGTTATCCGGATTTACTGGGTGTAAGGGAGCGCAGGCGGTTTGTAAAGTCAAGTGTGAAATCCC  
CGGGCTCAACCTGGGAAGTGCATCTGATACTGGCAAGCTTGAGTCTCGTAGAGGGGGGTAGAATTCATGTGTAGCGGTA  
AAATGCGTAGATATATGGAGGAACACCAGTGGCGAAGGCGGCTGCTGGCTTAACTGACACTGAGGCACGAAAGCGTG  
GGGAG

>ASV:3954:Order:Clostridiales

AACGTAGGTCAAGCGTTGTCCGGAATTACTGGGTGTAAGGGAGCGCAGGCGGGAAGACAAGTTGGAAGTGAATCTA  
TGGGCTCAACCCCGGACTGCATTTGAAACTGTGAGGCTAGAGTGTGCGGAGAGGAAAGCGGAATTCCTAGTGTAGCGGTG  
AAATGCGTAGATATTAGGAGGAACACCAGTGGCGAAGGCGACTTACTGGGCACCAACTGACGCTGAGGCTCGAAAGCATG  
GGTAG

>ASV:3955:Genus:Actinomyces

TACGTAGGGGGCGAGCGTTGTCCGGAATTATTGGGCGTAAAGAGCTCGTAGGCGGCTGGTCCGCTGTGCTGAAATCCT  
CTGGCTTAACTGGGGGCTTGGGTTACGGGCGGCTTGAGTGCAGTGGGAGACTGGAACCTCTGGTGTAGCGGTG  
AAATGCGTAGAGATGGGAGGAACACCAGTGGCGAAGGCGGCTGCTGGCTTAACTGACGCTGAGGCACGAAAGCGTG  
GGTAG

>ASV:3956:Order:Clostridiales

TACGTAGGGAGCGAGCGTTGTCCGGAATTACTGGGTGTAAGGGAGCGTAGGCGGGACGGCAAGTCAAGTGTGAAAACCTA  
TGGGCTCAACCCATAGACTGCATTTGAAACTGTTGTTCTGGAGTACCGGAGAGGTAAGCGGAATTCCTAGTGTAGCGGTG  
AAATGCGTAGATATCACGAAGAAGCTCCGATTGCGAAGGCAGCTCACTGGAGTGAAGTACGCTGATGCTCGAAAGTGTG  
GGTAT

>ASV:3957:Order:Clostridiales

TACGTAGGGAGCGAGCGTTGTCCGGAATTACTGGGTGTAAGGGAGCGTAGGCGGACGCTTAAAGTCAAGTGTGAAAGTTT  
GCGGCTCAACCGTAAATGCAAGTGTGATACTGGTAGTCTTGAGTGCAGCAGAGGTAGGCGGAATTCGTGGTGTAGCGGTG  
AAATGCGTAGATATTGGGAGGAACACCAGTGGCGAAGGCGGCTTACTGGACGATGACTGACGTTGAGGCTCGAAAGCGTG  
GGGAG

>ASV:3958:Family:Ruminococcaceae

TACGTAGGTGGCAAGCGTTGTCCGGAATTACTGGGTGTAAGGGCGGTAGCCGGGAAGGCAAGTCAAGTGTGAAATCCA  
CGGGCTCAACTCGTGAAGTGCATCTGAAACTGTTTTCTTGAGTATCGGAGAGGCAATCGGAATTCCTAGTGTAGCGGTG  
AAATGCTTAGATATCACGAAGAAGCTCCGATTGCGAAGGCAGCTCACTGGACTGCAACTGACACTGATGCTCGAAAGTGTG  
GGTAT

>ASV:3959:Genus:Granulicatella

TACGTAGGTGGCAAGCGTTGTCCGGAATTATTGGGCGTAAAGCGAGCGCAGGCGGTTCTTAAAGTCTGATGTGAAAGCCC  
CCGGCTCAACCCGGGAGAGTCAATTGGAAACTGGGAACTTGAGTGCAGAAGAGAGAGTGAATTCATGTGTAGCGGTG  
AAATGCGTAGATATATGGAGGAACACCAGTGGCGAAGGCGACTCTCTGGTCTGTAAGTACGCTGAGGCTCGAAAGCGTG  
GGTAG

>ASV:3960:Family:Lachnospiraceae

TACGTAGGGGGCAAGCGTTATCCGGATTTACTGGGTGTAAGGGAGCGTAGACGGTTTACGCAAGTCTGAAGTGAAGGCC  
GGGGCTCAACCCCGTACTGATTTGAAACTGTCAGACTAGAGTGTGCGGAGAGGTAAGTGAATTCCTAGTGTAGCGGTG  
AAATGCGTAGATATCACGAAGAAGCTCCGATTGCGAAGGCAGCTCACTAGACTGTTACTGACACTGATGCTCGAAAGTGTG  
GGTAT

>ASV:3961:Family:Clostridiaceae\_1  
TACGTAGGTGGCGAGCGTTGTCCGGATTTACTGGGCGTAAAGGGAGCGTAGGCGGACTTTTAAAGTGAGATGTGAAATACC  
CGGGCTCAACCTGGGTGCTGCATTTCAAACCTGGAAGTCTAGAGTGCAGGAGAGGAGAATGGAATTCCTAGTGTAGCGGTG  
AAATGCATAGATATTAGGAGGAACACCAGTGGCGAAGGCGGCTTACTGGACGGTAACGACGTTGAGGCTCGAAAGCCGCG  
GGGAG

>ASV:3962:Order:Bacteroidales  
TACGGAGGATCCGAGCGTTATCCGGATTTATTGGGTTTAAAGGGTGCCTAGGCGGCCTTTTAAAGTCAGCGGTGAAAGTCT  
TGGGCTCAACCATAGAATTGCCGTTGAAACTGGGGGCTTGAGTATGTTTGGAGCAGCGGAATGCGTGGTGTAGCGGTG  
AAATGCGTAGATATTGGGAGGAACACCAGTGGCGAAGGCGCCTTCTGGACTGTGTCTGACGCTGAGATGCAAAGCCAG  
GGTAG

>ASV:3963:Genus:Anaerotruncus  
TACGTAGGGAGCGAGCGTTGTCCGGAATTACTGGGTGTAAGGGAGCGTAGGCGGGTTGCAAGTTGAATGTGAAACCTA  
CCGGCTTAACCTGGTAGACTGCTTTCAAACCTGCAATCTTGGTGAAGTAGAGGCAGCGGAATTCCTAGTGTAGCGGTG  
AAATGCGTAGATATTAGGAGGAACACCAGTGGCGAAGGCGGCTGCTGGGCTTAAACTGACGCTGAGGCTCGAAAGCGTG  
GGGAG

>ASV:3964:Genus:UBA1819  
AACGTAGGTACAAGCGTTGTCCGGAATTACTGGGTGTAAGGGAGCGCAGGCGGATTGGCAAGTTGGGAGTGAATCTA  
TGGGCTCAACCATAGAATTGCCGTTGAAACTGGCAAGCTTGGTGGTGTAGAGGTAGGCGGAATTCCTAGTGTAGCGGTG  
AAATGCGTAGATATTGGGAGGAACACCAGTGGCGAAGGCGGCTTACTGGACGATGACTGACGTTGAGGCTCGAAAGCGTG  
GGGAG

>ASV:3965:Family:Prevotellaceae  
AACGTAGGATCCGAGCGTTATCCGGATTTATTGGGTTTAAAGGGAGCGTAGGTGGATTGTTAAGCGTGTGTGAAATGTA  
GATGCTCAACATCTGAACCTGCAGCGCAACTGGCTTGAGTACACGCAACGTTGGCGGAATTCATGGTGTAGCGGTG  
AAATGCTTAGATATCACGAAGAACTCCGATTGCGAAGGCGGCTGCTAAGCTGCAACTGACATTGAGGCTCGAAAGTGTG  
GGTAT

>ASV:3966:Genus:Christensenellaceae\_R-7\_group  
TACGTAGGGGGCAAGCGTTGTCCGGAATGATTGGGCGTAAAGGGCTCGTAGGTGGCATGTCAAGTCTGAAGTGAAGTCC  
TACTTTCAAGGTGGGAATTGCTTTGGAACTGGCAAGCTTGGTATAGGAGAGGTTAGTGAATTCCTAGTGTAGCGGTG  
AAATGCGTAGAGATTAGGAGGAACATCAGTGGCGAAGGCGACTAACTGGACTAAAACGACTGAGGAGCGAAAGTGTG  
GGTAG

>ASV:3967:Family:Bifidobacteriaceae  
TACGTAGGGTCAAGCGTTATCCGGAATTATTGGGCGTAAAGGGCTCGTAGGCGGTTGTCGCGTCCGGTGTGAAAGTCC  
ATCGCTTAACCGTGGATCTGCGCGGGTACGGGCGGCTGGAGTGGCGTAGGGGAGACTGGAATTCCTAGTGTAGCGGTG  
GAATGTGTAGATATTAGGAGGAACACCAGTGGCGAAGGCGCCTTCTGGACTGTGTCTGACGCTGAGATGCAAAGCCAG  
GGTAG

>ASV:3968:Kingdom:Bacteria  
TACGGAGGATCCGAGCGTTATCCGGATTTATTGGGTTTAAAGGGAGCGTAGGTGGATTGTTAAGTCAGTTGTGAAAGTTT  
GCGGCTCGACCGTAAAATTGCAAGTGAAGTGAAGCTTGGAGAGGAAAGCGGAATTCCTAGTGTAGCGGTG  
AAATGCGTAGATATTAGGAGGAACACCAGTGGCGAAGGCGGCTTCTGGACGACGACTGACGCTGAGGCGCAAAGTGTG  
GGGAG

>ASV:3969:Family:Ruminococcaceae  
TACGTAGGGAGCAAGCGTTGTCCGGAATTACTGGGTGTAAGGGTGCCTAGGCGGCTTTCGCAAGTCAGATGTGAAATCTA  
TGGGCTCAACCCATGAACCTGCATTTGAAACTGTAGATCTTGGTGTGCGGAGGGGCAATCGGAATTCCTAGTGTAGCGGTG  
AAATGCTTAGATATTCGAGGAACACCAGTGGCGAAGGCGGCAACTGGGCTTAACTGACGCTGAGGCTCGAAAGTGTG  
GGGAG

>ASV:3970:Family:Clostridiaceae\_1  
AACGTAGGTCACTAGCGTTGTCCGGAATTACTGGGTGTAAGGGAACGTAAGGCGGATTTTAAAGTGAGATGTGAAATACT  
CGGGCTTAACCTGAGTGTGCATTTCAAACCTGGAAGTCTAGAGTGCAGGAGAGGAGAAGGGAATTCCTAGTGTAGCGGTG  
AAATGCATAGATATCACGAAGAACTCCGATTGCGAAGGCGGCAACTGGGCTTAACTGACGCTGAGGCTCGAAAGTGTG  
GGTAT

>ASV:3971:Family:Lachnospiraceae  
TACGTATGGTCAAGCGTTATCCGGATTTACTGGGTGTAAGGGAGCGTAGACGGCTGTGTAAGTCTGAAGTGAAGGCC  
GGGGCTCAACCCGGGACTGCATTGGAAGTGCCTAGAGTACCGGAGGGGTAAGTGAATTCCTAGTGTAGCGGTG  
AAATGCGTAGATATTAGGAGGAACACCAGTGGCGAAGGCGGCTTACTGGACGGTAACGACGTTGAGGCTCGAAAGCGTG  
GGGAG

>ASV:3972:Family:Ruminococcaceae  
TACGTAGGGAGCGAGCGTTGTCCGGAATTACTGGGTGTAAGGGAGCGTAGGCGGGACAGCAAGTTGAATGTGAAATCTA  
TGGGCTCAACCCATAAACTGCGTTCAAACCTGTTGTTCTTGGTGAAGTAGAGGTAGGCGGAATTCCTAGTGTAGCGGTG  
AAATGCGTGGATATTAGGAGGAACACCAGTGGCGAAGGCGGCTGCTGGACTGTAACGACGCTGATGCTCGAAAGTGTG  
GGTAT

>ASV:3973:Family:Ruminococcaceae  
TACGTAGGTGGCAAGCGTTGTCCGGAATTACTGGGTGTAAGGGCGTGTAGCCGGGAGGGCAAGTCAGATGTGAAATCCA  
CGGGCTCAACTCGTGAACCTGCATTTGAAGTACTCTTCTTGGTATCGGAGAGGCAATCGGAATTCCTAGTGTAGCGGTG  
AAATGCGTAGAGATCATAACGAACACCAGTGGCGAAGGCGGCTTACCAAACCTATATCTGACGTTGAGGACGAAAGCGTG  
GGGAG

>ASV:3974:Family:Ruminococcaceae  
TACGTAGGGAGCGAGCGTTGTCCGGAATTACTGGGTGTAAGGGTGCCTAGGCGGGCTGCAAGTCAGCGGTGAAATCCC  
GGGGCTTAACCCGAGGACTGCGGTTGAAACTGTGGTCTTGGTGAAGTAGAGGTAGGCGGAATTCCTAGTGTAGCGGTG

GAAATGCGTAGAGATCGGGAGGAACACCAGTGGCGAAGGCGGCTACTGGGCTTTAACTGACGCTGAGGCACGAAGGTGT  
GGTA  
>ASV:3975:Genus:Pseudoflavonifactor  
TACGTAGGGGGCAAGCGTTATCCGGATTTACTGGGTGTAAAGGGAGCGTAGGTGGACATGCAAGTCAGATGTGAAAACCA  
CGGGCTCAACCTGTGGCCTGCATTTGAAACTGTAGTTCTTGAGTACTGGAGAGGCAGACGGAATTCCTAGTGTAGCGGTG  
AAATGCGTAGATATACGAAGAAGCTCCGATTGCGAAGGCAGCTTCTGGACTGTAACGACGCTGATGCTCGAAAGTGTG  
GGTAT  
>ASV:3976:Kingdom:Bacteria  
TACGTAGGGGGCAAGCGTTATCCGGAACTTACTGGGCGTAAAGGGTGCCTAGGTGGTATGGCAAGTCAGAAGTAAAACCC  
AGGGCTTAACTCTGGGACTGCTTTTGAAGTGTGAGACTGGAGTGCAGTTGAGGCAGCGGAATTCGTGGTGTAGCGGTG  
AAATGCTTAGATATACGAAGAAGCTCCGATTGCGAAGGCAGCTTCTAAGCTGCAACTGACATTGAGGCTCGAAAGTGTG  
GGTAT  
>ASV:3977:Family:Ruminococcaceae  
TACGTAGGTGGCGAGCGTTATCCGGAACTTATTGGGTGTAAAGGGTGCCTAGGCGGGTGTAAAGTCAGATGTGAAATGCG  
GAGGCTCAACCTCCGAACTGCATTTGAAACTTACGATCTTGAGTGGAGTAGAGGCAAGCGGAATTCCTGGTGTAGCGGTG  
AAATGCATAGATATCGGGAGGAACACCAGTGGCGAAGGCGGCTTCTAAGCTGCAACTGACATTGAGGCTCGAAAGTGTG  
GGTAT  
>ASV:3978:Family:Barnesiellaceae  
TACGGAGGATTCAAGCGTTATCCGGATTTATTGGGTTTAAAGGGTGCCTAGGCGGCATGGTAAGTCAGCGGTGAAATGCG  
TCAGCTTAACTGGCGAACTGCCATTGAAACTGTTTACCTTGAGTGTAGCGGAAGTATCGGAATGCGTGGTGTAGCGGTG  
AAATGCTTAGATATACGAAGAAGCTCCGATTGCGAAGGCAGCTTCTAAGCTGCAACTGACATTGAGGCTCGAAAGTGTG  
GGTAT  
>ASV:3979:Family:Lachnospiraceae  
TACGGAGGATTCAAGCGTTATCCGGATTTACTGGGTGTAAAGGGAGCGTAGACGGCATGGCAAGTCTGAAGTAAAAGCC  
GGGGCTCAACCCCGGACTGCTTTGAAACTATCAGCTAGAGTGTGGAGAGGTAAGCGGAATTCGTGGTGTAGCGGTG  
AAATGCTTAGATATACGAAGAAGCTCCGATTGCGAAGGCAGCTTACTGGACTGTAACGACGCTGATGCTCGAAAGTGTG  
GGTAT  
>ASV:3980:Family:Muribaculaceae  
TACGGAGGATGCGAGCGTTATCCGGATTTATTGGGTTTAAAGGGTGCCTAGGCGGACTGTCAAGTCAGCGGTAAAATTGA  
GAGGCTCAACCTCTTCCCGCGTTGAAACTGGTGGTCTTGAGTGGATGAGAAGTACGCGGAATGCGTGGTGTAGCGGTGA  
AATGCATAGATATACGCAGAAGCTCCGATTGCGAAGGCAGCTTACCGCATCCAAGTACGCTGAGGCACGAAAGCGTGG  
GGATC  
>ASV:3981:Kingdom:Bacteria  
TACATAGGTGGCAAGCGTTGTCCGGAATTACTGGGTGTAAAGGGAGCGTAGGCGGGAAGGCAAGTCAGATGTGAAATCCA  
CAGGCTTAACTGTGGCGTGCATTTGAAACTGTTTTCTTGAGTGAAGTAGAGGTAGCGGAATTCGTGGTGTAGCGGTG  
AAATGCTTAGATATACGAAGAAGCTCCGATTGCGAAGGCAGCTTACTGGACTGTAACGACGCTGATGCTCGAAAGTGTG  
GGTAT  
>ASV:3982:Genus:Akkermansia  
TACCTCTTCTCCCTCTTTTTCTTCCCTTTTCTTCCCTTTTCTTCTTCTTTTTCTTCTTCTTTTTCTTCTTTTTCTTCTT  
CGGGCTCAACCCCGGACCGGCACATGATACTGCGAGACTAGAGTAATGGAGGGGAACCGGAATTCCTGGTGTAGCAGTG  
AAATGCGTAGATATCGAGAGGAACACTCGTGGCGAAGGCGGTTCTTGACATTAACGACGCTGAGGCACGAAAGCCAG  
GGGAG  
>ASV:3983:Genus:Alistipes  
TCCTTCTTCTCCCTCTTCTCCTTCTTTTTTTTTCTTCTTCTTTTTCTTCTTTTTCTTCTTCTTTTTCTTCTTTTTCTTCT  
GGGGTAACTCCGGAAGTGCCTTAATACTGTTAGACTAGAGAGTAGTTGCGGTAGCGGAATGTATGGTGTAGCGGTG  
AAATGCTTAGAGATCATAAGAAACACCAGTGGCGAAGGCAGCTTACCAAATATATGACGTTGAGGCACGAAAGCGTG  
GGGAG  
>ASV:3984:Family:Peptostreptococcaceae  
TACGGAGGATCCGAGCGTTATCCGGATTTACTGGGCGTAAAGGGTGCCTAGGTGGTTTCTTAAGTCAGGAGTAAAAGGCT  
ACGGCTCAACCGTAGTAAGCTCTTGAAGTGGGAACTTGAAGTGCAGGAGAGGAAAGTGAATTCCTAGTGTAGCGGTGA  
AATGCGTAGATATTAGGAAGAACACCAGTGGCGAAGGCGGCTTACTGGACGTTAACTGACGTTGAGGCTCGAAAGCGTGG  
GGAGC  
>ASV:3985:Family:Ruminococcaceae  
TACGTAGGTGGCGAGCGTTATCCGGAACTTATTGGGTGTAAAGGGTGCCTAGGCGGGATGTAAAGTCAGATGTGAAATACC  
GCAGCTTAACTGCGGGCTGCATTTGAAACTTATGTTCTTGAGTAGAGTAGAGGCAAGTGAATTCCTAGTGTAGCGGTG  
GAATGCGTAGATATTAGGAGGAACATCGTGGCGAAGGCAGCTTCTGGGCTTAACTGACGCTGATGCACGAAAGTGTG  
GGGAG  
>ASV:3986:Genus:Fournierella  
AACGTAGGTGGCAAGCGTTGTCCGGAATTACTGGGTGTAAAGGGAGCGCAGGCGGGTGGCAAGTTGGAGGTGAAAGCTG  
TGGGCTCAACCCACAAGCTTCAAACTGCCGATCTTGAGTGGTGTAGAGGTAGCGGGAATTCCTGGTGTAGCGGTG  
GAATGCGTAGATATCGGGAGGAACACCAGTGGCGAAGGCGGCTTACTGGGCACTAACTGACGCTGAGGCTCGAAAGCATG  
GGTAG  
>ASV:3987:Order:Clostridiales  
TACGTAGGGAGCGAGCGTTGTCCGGAATTACTGGGCGTAAAGGGTGCCTAGGCGGTCTGAAAAGTCCGATGTGAAATCCC  
CGTGCTTAACTGGGAGCTGCATTCGAACTTTGGACTTGAGTGTGGAGAGGTAAGCGGAATTCCTGGTGTAGCGGTG  
GAATGCGTAGATATCGGGAGGAACACCAGTGGCGAAGGCAGCTTACTGGGCACTAACTGACGCTGAGGCTCGAAAGCATG  
GGTAG  
>ASV:3988:Family:Bifidobacteriaceae

TACGTAGGGGGCAAGCGTTATCCGGATTTACTGGGCGTAAAGCGCGCTAGGCGGCCCGGCAGGCCGGGGTCAAGCGG  
GGGGCTCAACCCCGAAGCCCGGAACCTCCGCGCTTGGGTCCGGTAGGGGAGACTGGAATTCCTGGTGTAAACGGTG  
GAATGTGTAGATATCGGAAGAACACCAATGGCGAAGGCAGGTCTCTGGGCCGTTACTGACGCTGAGGAGCGAAAGCGTG  
GGGAG

>ASV:3989:Genus:GCA-900066225

TACGTAGGTAGCGAGCGTTGTCCGGAATTTACTGGGTGTAAGGGAGCGTAGGCGGGATTGCAAGTTGAATGTCAAACTA  
TGGGCTCAACCCGTAAGTTCGCGTTCAAACCTGTAGTCTTGTAGTGAAGTAGAGGCAGGCGGAATTCCTAGTGTAGCGGTGA  
AATGCGTAAATATTAGGAGAACACCAAGTGGCGAAGGCAGCTGCTGGGCTTTAACTGACGCTGAGGCTCGAAAGCGTGG  
GTAGC

>ASV:3990:Genus:Lachnoclostridium

TACGTAGGGGGCAAGCGTTATCCGGATTTACTGGGTGTAAGGGAGCGTAGACGGCACTGCAAGTCTGAAGTAAAAGCCC  
GGGGCTCAACCCCGGACTGCTTTGAAAACCTAGGGCTAGAGTGTGGAGAGGCAAGCGGAATTCCTAGTGTAGCGGTG  
AAATGCGTAGATATTAGGAAGAACACCAAGTGGCGAAGGCAGCTTGTGGACAGTAACTGACGCTCAGGCTCGAAAGCGTG  
GGGAG

>ASV:3991:Family:Lachnospiraceae

TACGGAGGATCCAAGCGTTATCCGGATTTATTGGGTTAAAGGGAGCGTAGACGGCAAGCCAGATGTAAAAGCCC  
GGGGCTCAACCCCGGACTGCAATTTGAACTGCTGAGCTAGAGTGTGGAGAGGCAAGTGAATTCCTAGTGTAGCGGTG  
AAATGCGTAGAGATTAGGAAGAACACCGGTGGCGAAGGCAGCTTACTAACCTGTAACGACATTGATGCTCGAAAGTGTG  
GGTAT

>ASV:3992:Genus:Erysipelatoclostridium

TACGTAGGTGGCGAGCGTTATCCGGAATCATTGGGCGTAAAGAGGGAGCAGGCGGCAAGTGCAGGTCTGCGGTAAAAGCCC  
GAAGCTAAACTCCGTAAGCCGTGGAACCCGACAGCTAGAGAGCATCAGAGGATCGCGGAATTCCTAGTGTAGCGGTGA  
AATGCGTAGATATATTAGGAAGAACACCAAGTGGCGAAGGCAGCTTACTGGACGATAACTGACGCTGAGGCTCGAAAGCGTG  
GGAGC

>ASV:3993:Genus:Sphingomonas

TACGGAGGGGGCTAGCGTTGTTCGGAATTTACTGGGCGTAAAGCGCACGTAGGCGGCTTTGTAAGTTAGAGGTAAAAGCCC  
GGGGCTCAACTCCGGAAGTGCCTTTAAGACTGCATCGCTAGAAGCTCGGAGAGGTGAGTGAATTCCTAGTGTAGAGGTG  
AAATTCGTAGATATTAGGAAGAACACCAAGTGGCGAAGGCAGCTTACTGGACGACTGTTGACGCTGAGGTGCGAAAGCGTG  
GGGAG

>ASV:3994:Family:Lachnospiraceae

TACGTAGGGGGCAAGCGTTATCCGGATTTACTGGGTGTAAGGGAGCGTAGACGGCATAGTAAGTCTGATGTGAAAGGCG  
GGGGCTCAACCCCTGGACTGCATTGAAACTATTAAGCTGGAGTGTGGAGAGGTAAGTGAATTCCTAGTGTAGCGGTG  
AAATGCGTAGATATTAGGAAGAACACCAAGTGGCGAAGGCAGCTTACTGGACGATCACTGACGTTGAGGCTCGAAAGCGTG  
GGGAG

>ASV:3995:Family:Ruminococcaceae

TACGGAGGATTCGAGCGTTATCCGGATTTATTGGGTTAAAGGGAGCGTAGACGGAGCAGCAAGTCAAGTGTGAAAAGTGT  
GGGGCTCAACTCCAGCTGATGGAAAGGAACTGTAAGTCTTGTAGTGTGGAGAGGCAATCGGAATTCCTGTGTAGCGGTG  
AAATGCGTAGATATACGAAGAAGTCCGATTGCGAAGGCAGCTCACTGGACTGCAACTGACACTGATGCTCGAAAGTGTG  
GGTAT

>ASV:3996:Order:Clostridiales

TACGTAGGGGGCAAGCGTTATCCGGATTTACTGGGTGTAAGGGCGTGCAGCCGGGCCGCAAGTCAAGTGTGAAATCTG  
GAGGCTTAACCTCAAACCTGATGGAAAGGAACTGTAAGTCTTGTAGTACCAGGAGGTTATCGGAATTCCTGTGTAGCGGTG  
AAATGCGTAGATATACGAAGAAGTCCGATTGCGAAGGCAGCTCACTAGACTGTTACTGACACTGATGCTCGAAAGTGTG  
GGTAT

>ASV:3997:Genus:Dialister

TACGTAGGTGGCAAGCGTTGTCCGGAATTTATTGGGCGTAAAGCGCGCAGGCGGCTTCCCAAGTCCCTTTAAAAGTGC  
GGGGCTTAACCTCCAGCTGATGGAAAGGAACTGGAAGCTGGAGTATCGGAGAGGAAAGTGAATTCCTAGTGTAGCGGTGA  
AATGCGTAGATATACGAAGAAGTCCGATTGCGAAGGCAGCTCACTGGAGCGCAACTGACGCTGAAGCTCGAAAGTGTGG  
GTAGC

>ASV:3998:Genus:Anaerofilum

TACGGAGGATCCGAGCGTTATCCGGATTTATTGGGTTAAAGGGTGCCTAGGCGGCTTTTAAAGTCAAGCGGTGAAAGTCT  
GTGGCTCAACCATAGAAATTGCCGTTGAAACTGTTTTCTTGTAGTGTGAGAGGTAAGTGAATTCCTAGTGTAGCGGTG  
GAATGCGTAGATATCGGAGGAACACCAAGTGGCGAAGGCAGCTTACTGGCACCAACTGACGCTGAGGCTCGAAAGTGTG  
GGTAG

>ASV:3999:Genus:Fusobacterium

TACGTATGTCACGAGCGTTATCCGGATTTATTGGGCGTAAAGCGCGTCTAGGTGTTATGTAAGTCTGATGTGAAAATGC  
AGGGCTCAACTCTGTATTGCGTTGAAACTGTATAACTAGAGTACTGGAGAGGTAAGTGAATTCCTAGTGTAGAGGTGA  
AATTCGTAGATATTGTAGGAATGCCGATGGGAAGCCAGCTTACTGGACAGATACTGACGCTAAAGCGCGAAAGCGTGG  
GTAGC

>ASV:4000:Species:anaerobius

TACGTAGGGGGCTAGCGTTATCCGGATTTACTGGGCGTAAAGGGTGCCTAGGTGGCTTTTCAAGTCCGTTGGTTAAAGGCT  
ACGGCTCAACCGTAGTTAGCCTCCGAAACTGGAAGACTTGTAGTGCAGGAGAGGAAAGTGAATTCCTAGTGTAGCGGTGA  
AATGCGTAGATATTGGGAGGAACACCAAGTGGCGAAGGCAGCTTCTGGACTGCAACTGACACTGAGGACCGAAAGCGTGG  
GTAGC

>ASV:4001:Species:boronicumulans/ginsengisoli

TACGTAGGGTGCAGCGTTAATCGGAATTTACTGGGCGTAAAGCGTGCAGGCGGTTATATAAGACAGTTGTGAAATCCC  
CGGGCTCAACCTGGGAAGTGCATCTGTGACTGTATAGCTAGAGTACGGTAGAGGGGATGGAATTCCTAGTGTAGCAGTG  
AAATGCGTAGATATCGGAGGAACACCAAGTGGCGAAGGCAATCCCTGGACCTGACTGACGCTCATGCACGAAAGCGTG

GGGAG

>ASV:4002:Family:Lachnospiraceae

TACGTAGGGGGCAAGCGTTATCCGGATTTACTGGGTGTAAGGGGAGCGCAGACGGCACTGCAAGTCTGAAGTAAAAGCCC  
GGGGCTCAACCCGGGACTGCTTTGGAACTGTAGAGCTAGAGTGTGGAGAGGCAAGCGGAATTCCTAGTGTAGCGGTG  
AAATGCTTAGATATCACGAAGAAGTCCGATTGCGAAGGCAGCTCACTGGAGTGAACGACGCTGATGCTCGAAAGTGTG  
AGTAT

>ASV:4003:Genus:Ruminococcaceae\_UCG-005

TACGTAGGTGGCAAGCGTTATCCGGATTTACTGGGTGTAAGGGGAGCGTAGGCGGGACTGCAAGTCTGATGTGTAATCTG  
GTGGCTCAACCCAACTGCATTGGAACTGTAGTTCTTGTAGTATCGGAGAGGCAAGCGGAATTCCTAGTGTGGCGGTG  
AAATGCGTAGATATTAGGAAGAACCAGTGGCGAAGGCGGCTGCTGGACGACAACGACGCTGAGGCGCAAAGCGTG  
GGGAG

>ASV:4004:Genus:Lachnospiraceae\_UCG-010

TACGTAGGGGGCAAGCGTTATCCGGATTTACTGGGTGTAAGGGGAGCGTAGGCGGCATGGTAAGCCAGATGTAAAAGCCC  
GAGGCTTAACTTCGAGGATTGCATTTGAACTATCAAGCTAGAGTACAGGAGAGGAAAGCGGAATTCCTAGTGTAGCGGT  
GAAATGCGTAGATATTAGGAAGAACCAGTGGCGAAGGCGGCTTACTGGACTGTTACTGACGCTGAGTACGAAAGCGT  
GGGGA

>ASV:4005:Order:Clostridiales

AACGTAGGTCAAGCGTTGTCCGGATTTACTGGGTGTAAGGGGAGCGTAGACGGTGTGGCAAGTCTGATGTAAAAGGCA  
TGGGCTCAACCTGTGGACTGCATTGGAACTGTACTACTTGTAGTGCAGGAGGGGTAAGCGGAATTCCTAGTGTAGCGGTG  
AAATGCTTAGATATCACGAAGAAGTCCGATTGCGAAGGCAGCTCACTAGACTGTTACTGACACTGATGCTCGAAAGTGTG  
GGTAT

>ASV:4006:Genus:Butyricimonas

TACGGGGGATCGGGCGTTATCCGGATTTATTGGGTTTAAAGGGGCGGTAGGCGGGACGCCAAGTCCGGCGTAAAAGACT  
GCAGCTAACTGTAGCACGCCGTTGAACTGGCGACCTCGAGACGAGACGAGGGAGGCGGAATTCGTGGTGTAGCGGTGA  
AATGCTTAGATATCACGAAGAAGTCCGATTGCGAAGGCAGCTTACTGGATTGTAACGACGCTGATGCTCGAAAGTGTG  
GTATC

>ASV:4007:Genus:Leuconostoc

TACGTATGTCCCGAGCGTTATCCGGATTTATTGGGCGTAAAGCGAGCGCAGACGGTTGATTAAGTCTGATGTAAAAGCCC  
GGAGCTCAACTCCGGAATGGCATTGAACTGGTAACTTGTAGTGTGTAGAGGTAAGTGGTACTCCATGTGTAGCGGTG  
GAATGCGTAGATATATGGAAGAACCAGTGGCGAAGGCGGCTTACTGGACAACAACGACGTTGAGGCTCGAAAGTGTG  
GGTAG

>ASV:4008:Genus:Faecalibacterium

AACGTAGGTCAAGCGTTGTCCGGATTTACTGGGTGTAAGGGGAGCGCAGGCGGGAAGACAAGTTGGAAGTAAAATCTA  
TGGGCTCAACCATAAACTGCTTTCAAACCTGTTTTCTTGTAGTAGTGCAGAGGTAGGCGGAATTCCTGGCGTAGCGGTG  
AAATGCTTAGATATCACGAAGAACCAGTGGCGAAGGCAGCTTCTAACTGTAACGACGTTATGCTCGAAAGTGTG  
GGTAT

>ASV:4009:Genus:UBA1819

AACGTAGGGTCAAGCGTTGTCCGGATTTACTGGGTGTAAGGGGAGCGAAGGCGGATTGCAAGTTGGGAGTAAAATCTA  
TGGGCTCAACCATAAATTGCTTTCAAACCTGTCAGTCTTGTAGTGTGTAGAGGTAGGCGGAATTCCTGGTGTAGCGGTG  
GAATGCGTAGATATCGGGAGGAACACCAGTGGCGAAGGCGGCTTACTGGGCACCAACTGACGCTGAGGCTCGAAAGTGTG  
GGTAG

>ASV:4010:Order:Bacteroidales

TACGGAGGATGCGAGTGTATCCGGATTTATTGGGTTTAAAGGGTGCCTAGGTTGCAAGGGAAGTCAAGGGGTAAAAGCT  
GTAGCTCAACTATGGTCTTGCCTTTGAACTCTCTAGCTAGAGTGTACTGGAGGTACGTGGAACGTGTGGTGTAGCGGTG  
AAATGCTAGATATCGGGAGGAACACCAGTGGCGAAGGCGGCTTACTGGGCACCAACTGACGCTGAGGCTCGAAAGCATG  
GGTAG

>ASV:4011:Family:Ruminococcaceae

TGCGTAGGTGGCGAGCGTTATCCGGATTTACTGGGTGTAAGGGGCGCGTAGGCGGGAATGCAAGTCAAGTGTGAAATCCA  
AGGGCTCAACCTTGAATTGCTTTCAAACCTGTTTTCTTGTAGTAGTGCAGAGGTAGATGGAATTCCTGGTGTAGCGGTG  
GAATGCGTAGATATCGGGAGGAACACCAGTGGCGAAGGCGGCTTACTGGGCGCAACTGACGCTGAGGCTCGAAAGCATG  
GGTAG

>ASV:4012:Phylum:Firmicutes

TACGTAGGGGGCAAGCGTTGTCCGGATTTATTGGGCGTAAAGGGTGCCTAGGCGGCGATCAAGTCAAGTGTGAAAGACC  
CATGCTTAAATGTTGGGTTGCACTTGAACCTGGTTGGCTTGTAGTATGGGAGAGGCAAGCGGAATTCCTGGTGTAGCGGTG  
AAATGCGTAGAGATCGGGAGGAACACCAGTGGCGAAGGCGGCTTACTGGACAAAACGACGCTGAGGCACGAAAGCGTG  
GGTAG

>ASV:4013:Genus:Murdochiella

TACGTAGGGGGCGAGCGTTGTCCGGATTTATTGGGCGTAAAGGGTACGTAGGCGGCTTGTAAAGTTTGGCGTTAAATCT  
GGGGCTCAACCCAGCAAGCGTTGAAACTGGCGAGCTTGTAGTAGTAGAGGGGACAGTGAATTCCTAGTGTAGCGGTGA  
AATGCGTAGAGATTAGGAAGAATACCGGTGGCGAAGGCGACTGTCTGGATACATACTGACGCTGAGGTACGAAAGCGTG  
GGAGC

>ASV:4014:Family:Lachnospiraceae

TACGTAGGGGGCAAGCGTTATCCGGATTTACTGGGTGTAAGGGGAGCGCAGGCGGCATGATAAGTCTGATGTGAAAACCC  
AAGGCTCAACCATGGGACTGCATTGGAACTGTCTGCTGGAGTGTGGAGAGGTAAGCGGAATTCCTAGTGTAGCGGTG  
AAATGCGTAGATATTAGGAGGAACACCAGTGGCGAAGGCGGCTTACTGGACGATGACTGACGCTGAGGCTCGAAAGTGTG  
GGGAG

>ASV:4015:Family:Lachnospiraceae

TACGTAGGGGGCAAGCGTTATCCGGATTTACTGGGTGTAAGGGGAGCGTAGACGGCATGGCAAGCCAGATGTGAAAAGCCC



AGGGCTCAACCCCGGACTGCATTTGGAAGTGTCTAGGCTAGAGTGTCTGGAGAGGAAAGCGGAATTCATAGTGTAGCGGTG  
AAATGCTTAGATATCACGAAGAAGTCCGATTGCGAAGGCAGCTCACTGGAGTGAACGACGCTGATGCTCGAAAGTGTG  
GGTAT  
>ASV:4016:Genus:Akkermansia  
TACGGAGGTCTCAAGCGTTGTTCCGAATCACTGGGCGTAAAGCGTGCCTAGGCGGTTTCGTAAGTCGTGTGTGAAAGGCG  
GGGCTCAACCCCGGACTGCACATGATACTGCGAGACTAGAGTAATGGAGGGGAACCGGAATTCCTGGTGTAGCAGTGA  
AATGCGTAGATATCACGAAGAAGTCCGATTGCGAAGGCAGCACACTAATCCGTAACGACGTTATGCTCGAAAGTGTG  
GTATC  
>ASV:4017:Species:junii/soli/towneri  
TACAGAGGGTGCAGCGTTAATCGGATTTACTGGGCGTAAAGCGCGCTAGGTGGCTAATTAAGTCAAATGTGAAATCCC  
CGAGCTTAACCTGGGAATTGCATTGATACTGTTGGCTAGAGTATGGAGAGGATGGTAGAATTCAGGTGTAGCGGTG  
AAATGCGTAGAGATCTGGAGGAATACCGATGGCGAAGGCAGCCATCTGGCCTAATACTGACACTGAGGTGCGAAAGCATG  
GGGAG  
>ASV:4018:Genus:Nocardioide  
TACGTAGGGTCCGAGCGTTGTCGGGAATTATTGGGCGTAAAGGGCTCGTAGGCGGTTTGTACGTCGGGAGTGAAAACAC  
TGGGCTTAACCTCAGTGCCTTTCGATACGGGCAGACTAGAGGTATGCAGGGGAGAATGGAATTCCTGGTGTAGCGGTG  
AAATGCGCAGATATCAGGAGGAACACCGGTGGCGAAGGCAGTTCTCTGGCATTACCTGACGCTGAGGAGCGAAAGTGTG  
GGGAG  
>ASV:4019:Genus:Coproccoccus\_3  
TACGTATGGTCAAGCGTTGTCGGGAATTACTGGGTGTAAGGGAGCGTAGACGGCTGTGTAAGTCTGAAGTGAAGGCC  
GGGGCTCAACCCCGGACTGCTTTGGAACATATGCAGCTAGAGTGTCTGGAGAGGTAAGTGAATTCAGTGTAGCGGTG  
AAATGCGTAGATATTGGGAGGAACACAGTGGCGAAGGCAGCTTGTCTGGACTGTAACGACGCTGATGCTCGAAAGTGTG  
GGTAT  
>ASV:4020:Family:Ruminococcaceae  
TACGTAGGTGGCAAGCGTTATCCGGAATTACTGGGTGTAAGGGAGCGCAGGCGGGATGCAAGTCAAGTGTGAAAACCTA  
TGGGCTCAACCCATGAAGTGCAGTTGAAACTGTTATCTTGTAGTGGAGTAGAGGCAAGCGGAATTCAGTGTAGCGGTG  
AAATGCGTAGATATTGGGAGGAACACAGTGGCGAAGGCAGCTTGTCTGGCTCTAACGACGCTGAGGCTCGAAAGTGTG  
GGGAG  
>ASV:4021:Family:Ruminococcaceae  
TACGTAGGGAGCGAGCGTTGTCGGGAATTACTGGGTGTAAGGGAGCGTAGGCGGGAAAGCAAGTTGGAAGTGAATGCA  
TGGGCTTAACCCATGAGCTGCTTTCAAACCTGTTTTCTTGTAGTGAAGTAGAGGCAAGCGGAATTCAGTGTAGCGGTG  
AAATGCGTAGATATTAGGAGGAACACAGTGGCGAAGGCAGCTCACTGGACTGTAACGACACTGAGGCTCGAAAGCGTG  
GGGAG  
>ASV:4022:Family:Clostridiales\_vadinBB60\_group  
TACGTAGGAGGCAAGCGTTATCCGGAATGACTGGGCGTAAAGGGTGCCTAGGTGGCTTGGCAAGTTGGTAGCGTAATTC  
GAGGCTCAACCTCGGCGCTACTACAAAACCTGTCAGGCTCGAGTGCAGGAGGGGTAAGTGAATTCCTAGTGTAGCGGTG  
GAATGCGTAGATATTAGGAGGAACACCGTGGCGAAGGCAGCTTACTGGACTGTAACGACACTGAAGCACGAAAGCGTG  
GGGAG  
>ASV:4023:Genus:Barnesiella  
TACGGAGGATGCGGGGTTATCCGGATTTATTGGGTTAAAGGGTGCCTAGGCGGCACGCCAAGTCAAGCGGTGAAATTTT  
CGGGCTCAACCCGACTGTGCCGTTGAAACTGGCGAGCTAGAGTGCACAAGAGGCAGGCGGAATGCGTGGTGTAGCGGTG  
AAATGCTAGATATCACGCAGAACCCGATTGCGAAGGCAGCTGCTAGGGTCCGACAGACGCTGAGGCACGAAAGCGTG  
GGTAT  
>ASV:4024:Genus:Ruminococcaceae\_UCG-014  
TACGTAGGGAGCAAGCGTTATCCGGATTTATTGGGTGTAAGGGTGCCTAGACGGAGAAGCAAGTTAGTTGTGAAATCCC  
TCGGCTTAACCTGAGGAACTGCAACTAAAACCTACTTCCCTTGTAGTGTGGAGAGGAAAGTGAATTCCTAGTGTAGCGGTG  
AAATGCTTAGATATCACGAAGAAGTCCGATTGCGAAGGCAGCTCACTAGACTGCTCACTGACACTGATGCTCGAAAGTGTG  
GGTAT  
>ASV:4025:Family:Lachnospiraceae  
TACGTAGGGGGCAAGCGTTATCCGGATTTACTGGGTGTAAGGGTGCCTAGGCGGCGCAGTTAGTCAAGAAGTGAATATC  
GGGGCTTAACCCGGGGCTGCTTCTGATACTGCTGTGCTCGAGTGCAGGAGTGGTAAGTGAATTCCTAGTGTAGCGGTG  
AAATGCGTAGATATTAGGAGGAACACAGTGGCGAAGGCAGCTTACTGGACTGTAACGACGCTGAGGCACGAAAGCGTG  
GGTAG  
>ASV:4026:Family:Ruminococcaceae  
TACGGAGGATCAAGCGTTATCCGGATTTACTGGGTGTAAGGGCGTGTAGCCGGGAAGGCAAGTCAAGTGTGAAATCCA  
CGGGCTCAACTCGTGAAGTGCAGTTGAAACTGTTATCTTGTAGTGGAGTAGAGGCAAGCGGAATTCAGTGTAGCGGTG  
AAATGCTTAGATATTGGGAGGAACACAGTGGCGAAGGCAGCTTGTCTGGGCTCTAACTGACGCTGAGGCTCGAAAGTGTG  
GGGAG  
>ASV:4027:Order:Bacteroidales  
TACGGAGGATCAAGCGTTGTCGGATTTACTGGGTGTAAGGGTGCCTAGGCGGATTGGCAAGTCAAGAAGTGAATCCA  
TGGGCTTAACCCATGAAGTGCCTTTGAAACTGTTAGTCTTGTAGTACAGTAGAGGTGGGCGGAATTCGTGGTGTAGCGGTG  
AAATGCTTAGATATCACGAAGAAGTCCGATTGCGAAGGCAGCTCACTAGACTGCAACTGACACTGATGCTCGAAAGTGTG  
GGTAT  
>ASV:4028:Order:Clostridiales  
TACGTAGGGAGCGAGCGTTGTCGGGAATTACTGGGTGTAAGGGAGCGTAGACGGTGTGGCAAGTCTGATGTGAAAGGCA  
TGGGCTCAACCTGTGGACTGATTGGAACTGTCATACTTGTAGTGCAGGAGGGTAAGCGGAATTCCTAGTGTAGCGGTG  
AAATGCTTAGATATCACGAAGAAGTCCGATTGCGAAGGCAGCTGCTAAGCTGCAACTGACATTGAGGCTCGAAAGTGTG  
GGTAT

>ASV:4029:Genus:Ruminiclostridium\_5  
TACGTAGGGAGCAAGCGTTGTCCGGATTTACTGGGTGTAAGGGTGCCTAGGCGGATTGGCAAGTCAGAAGTGAAATCCA  
TGGGCTTAACCCATGAAGCTTTTTGAAACTGTTAGTCTTGAGTGAAGTAGAGGTAGGCGGAATTCGCGGTGTAGCGGTG  
AAATGCTTAGATATCACGAAGAACTCCGATCGCAAGGCATTGTGCCGGGGCATAACTGACGCTGAGGCTCGAAAGTGTG  
GGTAT

>ASV:4030:Family:Lachnospiraceae  
TACGTAGGGGGCAAGCGTTATCCGGATTTACTGGGTGTAAGGGGAGCGTAGGTGGTTTGGCAAGTCAGAAGTGAAAACCC  
AAGGCTTAACCCATGGGATTGCTTTTCAAACCTGCTGGGCTGGAGTGCCTGGAGAGTAAGTGGAATTCCTAGTGTAGCGGTG  
AAATGCGTAGATATTAGGAGGAACACCGGTGCGCAAGGCGGCTTACTGGACAGTAAGTACACTGAGGCTCGAAAGCGTG  
GGGAG

>ASV:4031:Genus:Subdoligranulum  
AACGTAGGGTGCAGCGTTGTCCGGAATTACTGGGTGTAAGGGGAGCGCAGGCGGACCGGCAAGTTGGTAGTGAAAACCTA  
TGGGCTCAACCCATAAATTGCTTTCAAACCTGCTGGCCTTGAGTGTGAGTGCAGAGGTAGGTGGAATTCGCGGTGTAGCGGTG  
GAATGCGTAGATATCGGGAGGAACACCCAGTGGCGAAGGCGACCTACTGGCACCAACTGACGCTGAGGCTCGAAAGCATG  
GGTAG

>ASV:4032:Class:Clostridia  
TACGTAGGGGGCGAGCGTTGTCCGGAATTACTGGGCGTAAAGGGTGCCTAGGCGGTTAGATAAGTCGGATGTGGAATACC  
CGGGCTTAACCCGGGGGTGTCATACGAAACTGTGTAACCTGAGTGCAGAAAGGAAAGCGGAATTCAGTGTAGCGGTG  
AAATGCGTAGATATTGGGAGGAACACCCAGTGGCGAAGGCGGCTTCTGGGCTGTAAGTACGCTGAGGCACGAAAGCGTG  
GGGAG

>ASV:4033:Family:Peptostreptococcaceae  
TACGTAGGGGGCTAGCGTTATCCGGAATTACTGGGCGTAAAGGGTGCCTAGGTGGTTTCTTAAGTCAGAGGTGAAAGGCT  
ACGGCTCAACCGTAGTAAGCCTTTGAAACTGGGAACTTGTAGTGCAGGAGAGGTTAGTGGAATTCAGTGTAGCGGTG  
AATGCGTAGAGATTGGGAGGAACACCCAGTGGCGAAGGCGACTAACTGGACTGTAAGTACGCTGAGGCGGAAAGTGTGG  
GGAGC

>ASV:4034:Order:Bacteroidales  
TACGGAGGATCCGAGCGTTATCCGGATTTATTGGGTTTAAAGGGAGCGTAGGCGGACTATTAAGTCAGCTGTGAAAGTTT  
GCGGCTCAACCGTAGTAAGCCTTTGAAACTGGTATTCTTGAGTGAAGTAGAGGTTGGCGGAATTCAGTGTAGCGGTG  
AAATGCGTAGATATTGGGAGGAACACCGGTGGCGAAGGCGCAACTGGGCTTAACTGACGCTGAGGCACGAAAGCATG  
GGTAG

>ASV:4035:Order:Bacteroidales  
TACGGAGGATCCGAGCGTTATCCGGATTTATTGGGTTTAAAGGGAGCGTAGGCGGGCTTTTAAAGTCAGCGGTCAAAATGT  
GTGGCTCAACCATGTCAAGCGGTTGAAACTGTCTGCTAGAGTTGAGTGCAGGATGAGGTAAGTGGAATTCAGTGTAGCGGTG  
AATGCATAGATATGACGCGAACTCCGATTGCGAAGGCGCATACCAACTCGCAACTGACGCTGAGGCTCGAAAGCGTGG  
GTATC

>ASV:4036:Genus:Christensenellaceae\_R-7\_group  
TACGTAGGGGGCGAGCGTTGTCCGGAATGACTGGGCGTAAAGGGGCGGTAGGCGGCTTTTAAAGTCTGGAGTGAAGGCC  
CGCTTTTAAAGTGGGAGTGTCTTGGAGACTGGAGACTTGTAGTGCAGGAGAGGTAAGTGGAATTCAGTGTAGCGGTG  
AAATGCGTAGAGATTGGGAGGAACACCCAGTGGCGAAGGCGACTTACTGGCCGTAAGTACGCTGAGGCGGAAAGCGTG  
GGGAG

>ASV:4037:Genus:Catabacter  
TACGTAGGGAGCGAGCGTTGTCCGGAATTTACTGGGCGTAAAGGGTGCCTGGGTGGTCAAGTAAGTCAGATGTGAAAGACC  
GGGGCTTAACCCGGGATTGCAATTTGAAACTGTTTACTTGTAGTACAGGAGAGGGAAGTGGAATTCCTAGTGTAGCGGTG  
AAATGCGTAGATATTAGGGGGAACACCCAGCGGCGAAGGCGACTTCTGGACTGCAACTGACACTGAGGCACGAAAGCGTG  
GGGAG

>ASV:4038:Family:Christensenellaceae  
TACGAAGGGAGCAAGCGTTGTCCGGAATTTACTGGGCGTAAAGGGTGCCTAGGCGGCGAGTTAGTGCAGAAGTGAAATATC  
GGGGCTTAACCCGGGCTGCTTCTGATACTGCTGTGCTCGAGTGCAGGAGAGGTAAGTGGAATTCCTAGTGTAGCGGTG  
AAATGCGTAGATATTAGGAGGAACACCCAGTGGCGAAGGCGACTTACTGGACTGTAAGTACGCTGAGGCACGAAAGCGTG  
GGTAG

>ASV:4039:Order:Clostridiales  
TACGTAGGGAGCAAGCGTTGTCCGGAATTTACTGGGCGTAAAGGGTGCCTAGGCGGCGGTTAAGTGCAGATGTGAAATACC  
CGTGCTTAACATGGGGGTGCATCTGATACTGGGCTGCTTGTAGTGCAGGAGAGGAAAGCGGAATTCCTAGTGTAGCGGTG  
AAATGCGTAGATATTAGGAGGAACACCCAGTGGCGAAGGCGGATTGCTGGACGATAACTGACGCTGAGGCGGAAAGCGTG  
GGGAG

>ASV:4040:Family:Lachnospiraceae  
TACGTATGGAGCAAGCGTTATCCGGATTTACTGGGTGTAAGGGTGCCTAGGTGGCAGTGCAAGTCAGATGTGAAAGGCC  
GGGGCTCAACCCGGGAGCTGCATTTGAAACTGTTTTTCTTGAGTATCGGAGAGGCAATCGGAATTCCTAGTGTAGCGGTG  
AAATGCGTAGATATCACGAAGAACTCCGATTGCGAAGGCGAGCTGCTAAGCTGCAACTGACATTGAGGCTTGAAAGTGTG  
GGTAT

>ASV:4041:Genus:GCA-900066225  
TACGTAGGTGGCAAGCGTTGTCCGGAATTTACTGGGTGTAAGGGGAGCGTAGGCGGGAAGATAAGTTGGACGTCTAATCTA  
TCGGCTCAACCGATAGTCCGTTCAAACCTGTTTTTCTTGAGTGAAGTAGAGGTAAGCGGAATTCCTAGTGTAGCGGTG  
AATGTGTAATATTAGGAGGAACACCCAGTGGCGAAGGCGGCTTACTGGGCTTAACTGACGCTGAGGCTCGAAAGCGTGG  
GTAGC

>ASV:4042:Genus:Christensenellaceae\_R-7\_group  
TACGGAGGGGGCGAGCGTTGTCCGGAATGATTGGGCGTAAAGGGGCGCTAGGCGGCTGCTAAGTCTGGAGTGAAGTCC  
TGCTTCAAGGTGGGAAGTGTCTTGGATACTGGTGGGCTGGAGTGCAGGAGAGGAAAGCGGAATTCAGGCTGTAGCGGTG

AAATGCGTAGATATTGGGAGGAACACCAGTGGCGAAGGCGCCTTTCTGGACTGTGTCTGACGCTGAGATGCGAAAGCCAG  
GGTAG  
>ASV:4043:Genus:UC5-1-2E3  
TACGTAGGTGGCGAGCGTTGTCCGGAATTATTGGGCGTAAAGAGCATGTAGGCGGCTTAATAAGTTCGAGCGTAAAATGC  
GGGGCTCAACCCGGGACTGCTTTGAAAAGTGTATGGCTAGAGTGTGGAGAGGCAAGCGGAATTCCTAGTGTAGCGGTG  
AAATGCGTAGATATTAGGGAGAACACCAGTGGCGAAGGCGGCTTGTGGACAGTAACTGACGTTACGGCTCGAAAAGCGTG  
GGGAG  
>ASV:4044:Family:Rikenellaceae  
TACGGAGGATTCAAGCGTTATCCGGATTTATTGGGTTAAAGGGTGCCTAGGCGGTTTGATAAGTTAGAGGTGAAATTC  
GGGGCTCAACCTGAACGTGCCTCTAATACTGTTGAGCTAGAGAGTAGTTGCGGTAGCGGAATTCCTAGTGTAGCGGTG  
GAATGCGTAGATATCGGGAGGAACACCAGTGGCGAAGGCGGCTACTGGGCACCAACTGACGCTGGGGCTCGAAAAGTGTG  
GGTAG  
>ASV:4045:Genus:Holdemania  
TACGTAGGTGGCGAGCGTTATCCGGAATTATTGGGCGTAAAGGGTGCAGGCGGTTTGTTAAGTTAAGGTGAAAGCGT  
GGGGCTTAACCCCATATAGCCTTAGAAACTGACAGACTAGAATACAGGAGAGGGCAATGGAATTCATGTGTAGCGGTAA  
AATGCGTAGATATATGGAGGAACACCAGTGGCGAAGGCGGTTGCCTGGCCTGTAAGTACGCTCATGCACGAAAGCGTGG  
GGAGC  
>ASV:4046:Order:Bacteroidales  
TACGGAGGATCCGAGCGTTATCCGGATTTATTGGGTTAAAGGGAGCGTAGATGGGTTGTTAAGTCAGTTGTGAAAGTTT  
GCGGCTCAACCGTAAAATTGCAATTGATACTGGCAGTCTTGAGTACAGTTGAGGTAGCGGAATTCGTGGTGTAGCGGTG  
AAATGCGTAGAGATTAGGAAGAACACCAGTGGCGAAGGCGGCTACTGGACGATAACTGACGCTGAGGTGCGAAAAGCGTG  
GGGAG  
>ASV:4047:Kingdom:Bacteria  
TACGTAGGTGGCAAGCGTTGTCCGGAATTACCGGTTAAAGGGAGCGCAGGCGGGAAATCAAGTTGGATGTGAAATGTC  
GGGGCTTAACCCCGGAAGTGCATCCAAAAGTACTGACTTTGAGTGAAGTAGAGGTAGCGGAATTCAGTGTAGCGGTG  
AAATGCTTAGATATACGAAGAAGTCCGATTGCGAAGGCGAGCTCACTGGACTGCAACTGACACTGATGCTCGAAAAGTGTG  
GGTAT  
>ASV:4048:Genus:Hydrogenoanaerobacterium  
TACGTAGGTGGCAAGCGTTGTCCGGAATTACTGGGTGTAAGGGAGCGTAGGCGGGAAGGCAAGTTGAATGTTAAATCTA  
CCGGCTCAACTGGTAGTCGCGTTCAAAGTGTCTTTCTTGAGTGAAGTAGAGGTAGCGGAATTCCTAGTGTAGCGGTGA  
AATGCGTAGATATTAGGAGGAACACCAGTGGCGAAGGCGGCTACTGGGCTTTTACTGACGCTGAGGCTCGAAAAGCATGG  
GTAGC  
>ASV:4049:Genus:Catenibacterium  
TACGTAGGGAGCGAGCGTTGTCCGGAATTACTGGGTGTAAGAGGGAGCAGGCGGCCGAAGGTTCTGTGGTGAAGACC  
GAAGCTAAACTTCGGTAAGCCATGAAACCGGGCGGCTAGAGTGCAGGAGAGGATCGTGAATTCATGTGTAGCGGTGA  
AATGCGTAGATATATGGAGGAACACCAGTGGCGAAGGCGGCTACTGGGCACCAACTGACGCTGAGGCTCGAAAAGTGTGG  
GTAGC  
>ASV:4050:Genus:Pyramidobacter  
TACGTAGGGAGCGAGCGTTATCCGGAATTACTGGGCGTAAAGGGCGCGTAGGCGGTTTCAAGTCGTTTCGTTAAATATT  
GAGGCTTAACCTCAAGGAGCGGCCGAAACTGAGACACTGGAGACACAGAGAGGCAAACAGAATTCCTGGTGTAGCGGTGA  
AATGCGTAGATATCAGGAAGAATACCGGTGGCGAAGGCGGTTTGTGGATGTGATCTGACGCTGAAGCGCGAAAAGCGGG  
GGAGC  
>ASV:4051:Species:sanfranciscensis  
TACGTAGGTGGCAAACGTTGTCCGGAATTATTGGGCGTAAAGGGAGCGCAGGCGGTTTATTAAGTCTGATGTGAAAGCCT  
TCGGCTTAACCGGAGAGTGCATCCGAAACTGATAAAGTGTAGTGCAGAAAAGGATAGTGGAACTTCATGTGTAGCGGTG  
AAATGCGTAGATATATGAAGGAACACCAGTGGCGAAGGCGGCTACTGGTCTGTAAGTACGCTGAGGCTCGAAAAGCATG  
GGTAG  
>ASV:4052:Family:Ruminococcaceae  
TACGTAGGTGGCAAGCGTTGTCCGGAATTACTGGGTGTAAGGGAGCGTAGGCGGGAGGATAAGTTGGACGTATAAACTA  
TCGGCTCAACCGGTAGAGCGTTCAAAGTGTCCATCTTGAGTGAAGTAGAGGTAAGCGGAATTCCTAGTGTAGCGGTGA  
AATGCGTAAATATTAGGAGGAACACCAGTGGCGAAGGCGGCTACTGGGCTTAACTGACGCTGAGGCTCGAAAAGCGTGG  
GTAGC  
>ASV:4053:Family:Muribaculaceae  
TACGGAGGATGCGAGCGTTATCCGGATTTATTGGGTTAAAGGGTGCAGGCGGCGCCCAAGTCAGCGGTCAAATCGA  
GGGGCTCAACCCCTTTCCGCGTTGAAACTGGGGCGCTAGAGTGGGCGAGAAGTAGGCGGAACGCGTGGTGTAGCGGTGA  
AATGCATAGATATACGCAGAACCCCGATTGCGAAGGCGAGCTACCGGCGCTACTGACGCTCATGCACGAAAGCGCGG  
GGATC  
>ASV:4054:Genus:Fusicatenibacter  
TACGGAGGATCCGAGCGTTATCCGGAATTATTGGGTTAAAGGGAGCGTAGACGGCAAGGCAAGTCTGATGTGAAAACCC  
AGGGCTTAACCTGGGACTGCATTGAAAAGTGTCTGGCTCGAGTGCAGGAGAGGTAAGCGGAATTCCTAGTGTAGCGGTG  
AAATGCGTAGATATCGGGAGGAACACCAGTGGCGAAGGCGGCTACTGGGCACCAACTGACGCTGAGGCTCGAAAAGTGTG  
GGTAG  
>ASV:4055:Family:Ruminococcaceae  
TACGTAGGGTGCAGCGTTAATCCGGAATTACTGGGTGTAAGGGTGCCTAGGCGGGATGTAAGTCAAGTGTGAAATGCC  
GCGGCTCAACCCGGAGCTGCATTTGAAAAGTGTCTTTGAGTGAAGTAGAGGTAAGCGGAATTCCTAGTGTAGCGGTG  
AAATGCGTAGATATTAGGAGGAACACCAGTGGCGAAGGCGGATTGTGGACGACAACGACGCTGAGGCGCGAAAAGCGTG  
GGGAG  
>ASV:4056:Genus:Shuttleworthia

TACGTAGGGGGCAAGCGTTATCCGGATTTACTGGGTGTAAAGGGAGCGCAGGCGGCATTATAAGTCTGATGTGAAAACCC  
AAGGCTCAACCATGGGACTGCATTGAAAAGTGTCTGTCTGGAGTGTCTGGAGAGGTGAGCGGAATTCCTAGTGTAGCGGTG  
AAATGCGTAGATATTAGGAGGAACACCAGTGGCGAAGGCGGCTTACTGGACGATGACTGACGCTGAGGCTCGAAAGCGTG  
GGGAG  
>ASV:4057:Order:Clostridiales  
TACGTAGGGAGCGAGCGTTGTCCGGAATTTACTGGGCGTAAAGGGTGCCTAGGCGGTATTTTAAAGTCCGATGTGAAATACT  
CGGGCTTAACCCGGGGCTGCATGCGAAAAGTGGGCTACTAGAGTGCAGGAGAGGTAAGCGGAATTCCTAGTGTAGCGGTG  
AAATGCGTAGATATTAGGAGGAACACCAGTGGCGAAGGCGGCTTACTGGACTGTAACGACGCTGAGGCACGAAAGCGTG  
GGGAG  
>ASV:4058:Family:Lachnospiraceae  
TACGTAGAGGGCAAGCGTTATCCGGATTTACTGGGTGTAAAGGGAGCGTAGACGGCACAGCAAGTCTGAAGTAAAATCCC  
CGGGCTCAACCCGGGAACTGCTTTGAAAAGTGTGGGCTAGAGTGTCTGGAGAGGCAAGCGGAATTCGTGGTGTAGCGGTG  
AAATGCTTAGATATCACGAAGAACCCTGATTGCGAAGGCAGCCTGCTAAGCTGCAACTGACATTGAGGCTCGAAAGTGTG  
GGTAT  
>ASV:4059:Family:Lachnospiraceae  
TACGTAGGGGGCAAGCGTTATCCGGATTTACTGGGTGTAAAGGGAGCGTAGACGGCAAGCAAGTCTGAAGTAAAACCC  
AGGGCTCAACCTGGGACTGCTTTGAAAAGTGTCTTTCTTGGAGTACGGAGAGGCAAGCGGAATTCCTAGTGTAGCGGTG  
AAATGCGTAGATATTAGGAGGAACACCAGTGGCGAAGGCGGATTGCTGGACGACAACGACGCTGAGGCGCGAAAGCGTG  
GGGAG  
>ASV:4060:Species:cinerea/flavescens/lactamica/meningitidis/mucosa/perflava/subflava  
TACGTAGGGTGCAGCGTTAATCGGAATTTACTGGGCGTAAAGCGAGCGCAGAGCGTTACTTAAAGCAGGATGTGAAAATCCC  
CGGGCTCAACCTGGGAACTGCGTTCTGAACTGGGTGACTAGAGTGTCTCAGAGGGAGGTAGAATTCACGCTGTAGCAGTG  
AAATGCGTAGAGATGTGGAGGAATACCAGTGGCGAAGGCAGCCTCCTGGGATAACACTGACGTTTCATGCTCGAAAGCGTG  
GGTAG  
>ASV:4061:Family:Lachnospiraceae  
TACGTAGGGGGCAAGCGTTATCCGGATTTACTGGGTGTAAAGGGAGCGTAGACGGATGGACAAGTCTGATGTGAAAGGCT  
GGGGCTCAACCCGGGACTGCATTGAAAAGTGCCTGCTTGGAGTACAGTAGAGGTGGGCGGAATTCGTGGTGTAGCGGTG  
AAATGCTTAGATATCACGAAGAACCCTGATTGCGAAGGCAGCTACTGGACTGTCACGACTGATGCTCGAAAGTGTG  
GGTAT  
>ASV:4062:Genus:Actinomyces  
TACGTAGGGCGCAGCGTTGTCCGGAATTTATGGGCGTAAAGGGCTTGTAGGCGGTTGGTCCGCTCTGCCGTGAAATCCC  
CTGGCTTAACCTGGGGCGTGCCTGGGTACGGGCTGACTTGGAGTGCCTGAGGAGAGGTAAGCGGAATTCCTGGTGTAGCGGTG  
GAATGCGCAGATATTAGGAGGAACACCAGTGGCGAAGGCAGCCTCCTGGGACATAAAGTACGCTCAGGCACGAAAGCGTG  
GGGAG  
>ASV:4063:Order:Chloroplast  
TACAGAGGATGCAAGCGTTATCCGGAATTTATGGGCGTAAAGCGTCTGTAGGTGGCTTTTAAAGTCCGCGCTCAAAATCCC  
AGGGCTCAACCCGGGAACTGGCTTTGAAAAGTGTGCAGCTGGAGTACGGTAGGGGAGAGGTAAGCGGAATTCCTGGTGTAGCGGTG  
AAATGCGTAGATATTAGGAGGAACACCAGTGGCGAAGGCAGCTCTGCTGGGCCGACACTGACACTGAGAGACGAAAGCTAG  
GGTAG  
>ASV:4064:Family:Lachnospiraceae  
TACGTAGGGGGCAAGCGTTATCCGGATTTACTGGGTGTAAAGGGAGCGTAGACGGCAGCGCAAGTCTGAAGTAAAAGCCC  
GGGGCTCAACCCGGGAACTGGCTTTGAAAAGTGTGCAGCTGGAGTACGGAGGGTAAGCGGAATTCCTAGTGTAGCGGTG  
AAATGCGTAGATATTAGGAGGAACACCAGTGGCGAAGGCGGCTTACTGGACGTTAAGTACGCTGAGGCTCGAAAGCGTG  
GGGAG  
>ASV:4065:Genus:Ruminococcaceae\_UCG-010  
TACGTAGGTGGCAAGCGTTATCCGGAATTTACTGGGTGTAAAGGGTGTGTAGGCGGGAAACAAGTCAAGCTGAGAGTAAAATGCC  
AAGGCTAAACCCGATGGAGCTGATTTGAAAAGTGTCTTGGAGTGGAGAGGTAAGCGGAATTCCTGGTGTAGCGGTG  
AAATGCGTAGATATTAGGAGGAACACCAGTGGCGAAGGCGGCTTACTGGGCTTTACTGACGCTGAGGCTCGAAAGCGTG  
GGGAG  
>ASV:4066:Family:Ruminococcaceae  
TACGTAGGTGGCAGCGTTGTCCGGAATTTACTGGGTGTAAAGGGAGTGTAGGCGGGAAGGCAAGTCAAGTGAAGTAAAATTA  
TGGGCTTAACCCGATAACCTGCTTTTGGAAAAGTGTCTTGGAGTGGAGCAGAGGCAAGCGGAATTCCTAGTGTAGCGGTG  
AAATGCTTAGATATCACGAAGAACCCTGATTGCGAAGGCAGCTTCTGGACTGTAACGACGCTGATGCTCGAAAGTGTG  
GGTAT  
>ASV:4067:Genus:Acidaminococcus  
TACGTAGGTGGCAAGCGTTGTCCGGAATTTATGGGCGTAAAGAGCATGTAGGCGGGCTTTTAAAGTCTGACGTGAAAATGC  
GGGGCTTAACCCGATGGCGTTGGATACTGGAAGTCTTGGAGTGCAGGAGAGGAAAGGGGAATTCCTGGTGTAGCGGTG  
AATGCTTAGATATCACGAAGAACCCTGATTGCGAAGGCAGCTTCTAAGCTGACGCTGACATTGAGGCTCGAAAGTGTGG  
GTATC  
>ASV:4068:Family:Ruminococcaceae  
TACGTAGGTGGCGAGCGTTATCCGGATTTACTGGGTGTAAAGGGCGCTAGGCGGGAATGCAAGTCAAGTCAAGTGTGAAATCCA  
AGGGCTCAACCCGTAAGTGCATTTGAAAAGTGTATTTCTGAGTGTGGAGAGGTTGACGGAATTCCTAGTGTAGCGGTG  
AAATGCGTAGATATTAGGAGGAACACCAGTGGCGAAGGCGGCTTACTGGCACCAACTGACGCTGAGGCTCGAAAGTGTG  
GGTAG  
>ASV:4069:Genus:Coprococcus\_2  
TACGTAGGGGGCAAGCGTTATCCGGAATTTACTGGGTGTAAAGGGTGCCTAGGTTGGCAAGGCAAGTCTGAAGTAAAATCCC  
GGGGCTCAACCCGGGAACTGCTTTGAAAAGTGTCTTAGCTAGAGTACAGGAGAGGTAAGTGAATTCCTAGTGTAGCGGTG  
AAATGCGTAGATATTAGGAGGAACACCAGTGGCGAAGGCGGCTTACTGGACAGTAACTGACGCTGAGGCGCGAAAGTGTG

GGGAG

>ASV:4070:Order:Bacteroidales

TACGGAAGGTCCGGGCTTATCCGGATTATTGGGTTTAAAGGGAGCGTAGGCGGACGCTTAAGTCAGTTGTGAAAGTTT  
GCGGCTCAACCGTAAAATTGCAGTTGATACTGGGTGCTTTCAGTGCAGTAGAGGTGGCGGAATTCGTGGTGCAGCGGTG  
AAATGCGTAGATATTTGGAAGAACCAGTGGCGAAGGCAGCCCTCTGGGACATGACTGACGCTCATGCACGAAAGCGTG  
GGGAG

>ASV:4071:Genus:Holdemanelia

TACGTATGGAGCGAGCGTTATCCGGAATGATTGGGCGTAAAGGGTGCCTAGGTGGCAGATCAAGTCTGGAGTAAAGGTA  
TGGGCTCAACCGTACTGGCTCTGGAAGTATCAGCTAGAGAACAGAAAGAGGACGCGGGAATTCATGTGTAGCGGTGA  
AATGCGTAGATATTAGGAGAACACCAGTGGCGAAGGCGGATTGCTGGACAGCAACTGACACTGAGGTACGAAAGCGTGG  
GGAGC

>ASV:4072:Genus:Tepidiphilus

TACGTAGGGTGCAGCGTTATCCGGAATTAATCGGAATTACTGGGCGTAAAGGGTGCAGGCGGCCCTGTAAGACCGGTGTGAAATCCC  
CTGGCTCAACCTGGGAATTGCGCTGGTACTGACGGCTAGAGTACGGTAGAGGGGGTGGAAATTCCTGGTGTAGCAGTG  
AAATGCGTAGAGATCAGGAGAACACCAATGGCGAAGGCAGCCCTCTGGGCTGTACTGACGCTCATGCACGAAAGCGTG  
GGGAG

>ASV:4073:Family:Erysipelotrichaceae

TACGTAGGTGGCAGCGTTATCCGGAATCATTGGGCGTAAAGAGGGAGCAGGCGCAGTGCAGTCTCGGTTGAAAGGCC  
GAAGCTAAACTTCGGTAAGCCGTGGAAACCGCACAGCTAGAGAGCATCAGAGGATCGCGGAATTCATGTGTAGCGGTGA  
AATGCTTAGATATCACGAAGAACTCCGATTGCGAAGGCAGCTCACCGACTGCAACTGACACTGATGCTCGAAAGTGTGG  
GTATC

>ASV:4074:Family:Bifidobacteriaceae

TACGTAGGGTGCAGCGTTATCCGGAATTAATGGGCGTAAAGGGCTCGTAGGCGGTTTCGTCGCTCCGGTGTGAAAGTCC  
ATCGCTTAACGGTGGATCCGCGCCGGGTACGGGCGGGCTTTCAGTGCAGTGGAGGAGACTGGAATTCATGTGTAGCGATG  
GAATGCGTAGATATATGGAAGAACCAGTGGCGAAGGCAGCTCTCTGGTCTGCAACTGACGCTGAGGCTCGAAAGCATG  
GGTAG

>ASV:4075:Family:Lachnospiraceae

TACGTAGGGGGCAAGCGTTATCCGGAATTAATGGGTTTAAAGGGGGCTAGACGGCATGGCAAGCCAGATGTGAAAGCCC  
GGGGCTCAACCCGGGACTGCATTTGAACTGTCAGGCTAGAGTGTCCGGAGAGGAAAGCGGAATTCCTAGTGTAGCGGTG  
AAATGCTTAGATATCACGAAGAACTCCGATTGCGAAGGCAGCTCACTGGACTGCAACTGACACTGATGCTCGAAAGTGTG  
GGTAT

>ASV:4076:Genus:UBA1819

TACGTAGGGGGCTAGCGTTGTCGGAATTAATGGGTTTAAAGGGAGCGCAGGCGGATTGGCAAGTTGGGAGTAAAATCTA  
TGGGCTCAACCATAAATTGCTTTCAAAGTGTGAGTCTTTCAGTGGTGTAGAGGTAGGCGGAATTCCTGGTGTAGCGGTG  
GAATGCGTAGATATCGGGAGAACACCAGTGGCGAAGGCAGCTCTCTGGACGACAAGTACGCTGAGGCGCGAAAGCGTG  
GGGAG

>ASV:4077:Class:Bacteroidia

TACGGAGGATCCGAGCGTTATCCGGAATTAATGGGTTTAAAGGGTGCCTAGGCGGCCCTTTAAGTCAGCGGTGAAAGTCT  
GTGGCTCAACCATAGAATTGCCGTTGAACTGGCAGTCTTTCAGTACAGTAGAGGTGGCGGAATTCGTGGTGTAGCGGTG  
AAATGCGTAGATATTAGGAGAACACCAGTGGCGAAGGCAGCTCACTGGGACTAACTGACGCTGAGGCTCGAAAGCATG  
GGTAG

>ASV:4078:Family:Lachnospiraceae

TACGTAGGGGGCAAGCGTTATCCGGAATTAATGGGTTTAAAGGGAGCGTAGGTGGTACTGCAAGTCAGAAGTAAAAGCCC  
CGTGCTTAACGTGGGACTGCTTTTGAAGTGTGGGACTAGAGTGCAGGAGAGGTAAGTGGAAATTCCTAGTGTAGCGGTG  
AAATGCGTAGATATTAGGAGAACACCAGTGGCGAAGGCAGCTCACTGGACTGTAAGTACACTGAGGCTCGAAAGCGTG  
GGGAG

>ASV:4079:Family:Lachnospiraceae

TACGTATGGAGCAAGCGTTATCCGGAATTAATGGGTTTAAAGGGTGCCTAGGTGGCAGTGCAGTGCAGATGTGAAAGGCC  
GGGGCTCAACCCGGAGCTGCATTTGAACTGCATAGCTAGAGTACAGGAGAGGCGAGCGGAATTCCTAGTGTAGCGGTG  
AAATGCTTAGATATCACGAAGAGCTCCGATTGCGAAGGCAGCTGCTAAGCTGCAACTGACATTGAGGCTCGAAAGTGTG  
GGTAT

>ASV:4080:Genus:Actinomyces

TACGTAGGGGGCAGCGTTGTCGGAATTAATGGGCGTAAAGAGCTCGTAGGCGGCTGGTCCGCTCTGTGCGTAAAATCCT  
CTGGCTTAACTGGGGCTTGCAGTGGGTACGGGCGGCTTTCAGTGCAGTGGGGAGGCTGGAATTCCTGGTGTAGCGGTG  
GAATGCGCAGATATCAGGAAGAACCAGTGGCGAAGGCAGCTTCTGGACGAAAAGTACGCTGAGGCGCGAAAGCGTG  
GGGAG

>ASV:4081:Genus:Bacteroides

TACGGAGGATCCGAGCGTTATCCGGAATTAATGGGTTTAAAGGGAGCGTAGGTGGATTGTTAGGTGAGTTGTGAAAGTTT  
GCGGCTCAACCGTAAAATTGCAGTTGAAACTGGCAGTCTTTCAGTACAGTAGAGGTGGCGGAATTCGTGGTGTAGCGGTG  
AAATGCGTAGATATTAGGAGAACACCAGTGGCGAAGGCAGCTCACTGGACGATGACTGACGTTGAGGCTCGAAAGCGTG  
GGGAG

>ASV:4082:Order:Bacteroidales

TACGGAGGATCCGAGCGTTATCCGGAATTAATGGGTTTAAAGGGAGCGTAGGTGGATTGTTAAGTCAAGTTGTGAAAGTTT  
GCGGCTCAACCGTAAAATTGCAGTTGATACTGGGTGCTTTCAGTACAGTAGAGGCGAGGCGGAATTCGTGGTGTAGCGGTG  
AAATGCGTAGATATTAGGAGAACACCAGTGGCGAAGGCAGCTGCTGGCGATAACTGACGCTCAGTCCCAGAAAGCGTG  
GGGAG

>ASV:4083:Family:Ruminococcaceae

TACGGAGGATCCGAGCGTTGTCGGAATTAATGGGTTTAAAGGGCGTGCAGCGGGCCGGAAGTCAAGTCAAGTGTGAAATCTG

GAGGCTTAACCTCCAACTGCATTTGAACTGTAGGTCTTGTAGTACCGGAGAGGTTATCGGAATTCCTTGTGTAGCGGTG  
AAATGCGTAGAGATGGGAGGAACACCAGTGGCGAAGGCGGCTGCTGGGCTTAACTGACGCTGAGGCACGAAAGCGTG  
GGTAG  
>ASV:4084:Kingdom:Bacteria  
TACGTAGGGAGCAAGCGTTGTCCGGATTTATTGGGTTAAAGGGAGCGTAGGTGGATTGTTAAGTCAGTTGTGAAAGTCT  
GCGGCTCAACCGTAAATTGCAGTTGAACTGGCAGTCTTGTAGTACAGTAGAGGTGGCGGAATTCGTGGTGTAGCGGTG  
AAATGCGTAGATATCGGAGGAACACCAGTGGCGAAGGCGGCTACTGGGCACCACTGACGCTGAGGCTCGAAAGTGTG  
GGTAG  
>ASV:4085:Genus:Ruminococcus\_2  
TACGTAGGGAGCAAGCGTTGCCGGATTTACTGGGTGTAAGGGTGCCTAGGCGGCTTTCGAAGTCAGATGTGAAATCTA  
TGGGCTCAACCCATAGCTGCATTTGAACTGCAGAGCTTGTAGTGAAGTAGAGGCAGGCGGAATTCCTCGTGTAGCGGTG  
AAATGCTTAGAGATCATACAGAACACCAGTTGCGAAGGCAGCTTACCAACTATATCTGACGTTGAGGCACGAAAGCGTG  
GGGAG  
>ASV:4086:Family:Veillonellaceae  
AACGTAGGTCAACAGCGTTGTCCGGATTTATTGGGCTAAAGCGCGCAGGCGGCTTCCAGGTCCCTCTTAAAAGTGC  
GGGGCTTAACCCCGTATGGGAAGGAACTGGGAAGCTGGAGTATCGGAGAGGAAAGTGAATTCCTAGTGTAGCGGTGA  
AATGCGTAGATATTGGGAGGAACACCAGTGGCGAAGGCGGCTTCTGGACTGTGTCTGACGCTGAGATGCGAAAGCCAGG  
GTAGC  
>ASV:4087:Order:Clostridiales  
TACGGAGGATCCGAGCGTTATCCGGATTTACTGGGTGTAAGGGCGCTAGGCGGACTGTCAAGTCAGTCGTGAAATACC  
GGGGCTTAACCCCGGGCTGCGATTGAACTGACAGCCTTGTAGTATCGGAGAGGAAAGCGGAATTCCTAGTGTAGCGGTG  
AAATGCTTAGATATCACGAAGAACCAGTTGCGAAGGCAGCTTACTGGATTGTAACGACGCTGATGCTCGAAAGTGTG  
GGTAT  
>ASV:4088:Order:Bacteroidales  
TACGGAGGATCCGAGCGTTATCCGGATTTATTGGGTTAAAGGGAGCGTAGACGGAGCAGCAAGTCTGATGTGAAAGGCA  
GGGGCTCAACCCCTGGACTGCATTGAACTGTCGGACTAGAGTGTGCGAGGGGTAAGCGGAATTCCTAGTGTAGCGGTG  
AAATGCTAGATATCACGAAGAACCAGTTGCGAAGGCAGCTTACTGGATTGTAACGACGCTGATGCTCGAAAGTGTG  
GGTAT  
>ASV:4089:Genus:Candidatus\_Stoquefichus  
TACGTAGGTGGCGAGCGTTATCCGGAAATCATTGGGCTAAAGAGGGAGCAGGCGGCAACTAGGGTCTGCGGTAAAAGACC  
GAAGCTAAACTTCGGTAAGCCGTGGAAACCGAGGAGCTAGAGTGCAGTAGAGGATCGTGAATTCATGTGTAGCGGTGA  
AATGCGTAGATATATGGAGGAACACCAGTGGCGAAGGCGACGGTCTGGGCTGCAACTGACGCTCAGTCCGAAAGCGTGG  
GGAGC  
>ASV:4090:Genus:Candidatus\_Stoquefichus  
TACGTAGGTGGCGAGCGTTATCCGGAAATCATTGGGCTAAAGAGGGAGCAGGCGGCAACTAGGGTCTGCGGTAAAAGACC  
GAAGCTAAACTTCGGTAAGCCGTGGAAACCGAGGAGCTAGAGTGCAGTAGAGGATCGTGAATTCATGTGTAGCGGTGA  
AATGCGTAGATATATGGAGGAACACCAGTGGCGAAGGCGGCTCTCTGGTCTGTAACGACGCTGAGGCTCGAAAGCGTGG  
GGAGC  
>ASV:4091:Order:Clostridiales  
TACGTAGGTGGCAAGCGTTGTCCGGATTTACTGGGTGTAAGGGCGTGCAGCCGGGCTGGCAAGTCAGGCGTGAAATCCC  
AGGGCTCAACCTGGAAGTGCCTTTGAACTGCTGGTCTCGAGTATCGGAGAGGAAAGTGAATTCCTAGTGTAGCGGTG  
AAATGCGTAGAGATTAGGAAGAACCAGTGGCGAAGGCGACTTCTGGACGAAAACGACGCTGAGGCGCGAAAGCGTGG  
GGAG  
>ASV:4092:Genus:Ruminiclostridium\_5  
TACGTAGGGAGCAAGCGTTGTCCGGATTTACTGGGTGTAAGGGTGCCTAGGCGGCTAGGCAAGTCAGACGTGAAAACCA  
TGGGCTCAACCTGTGGACTGCGTTTGAAGTGTAGCTTGTAGTGAAGTAGAGGTAGGCGGAATTCGTGGTGTAGCGGTG  
AAATGCTTAGATATCACGAAGAACCAGTTGCGAAGGCAGCTGCTAAGCTGCAACTGACATTGAGGCTCGAAAGTGTG  
GGTAG  
>ASV:4093:Genus:DTU089  
TACGTAGGGAGCGAGCGTTGTCCGGATTTACTGGGTGTAAGGGTGCCTAGGCGGATCTGCAAGTCAGTAGTAAATCCC  
AGGGCTTAACCTGGAAGTGCATTTGAACTGTGGTCTTGTAGTGAAGTGGAGGCAGGCGGAATTCCTGGTGTAGCGGTG  
AAATGCGTAGAGATCGGAGGAACACCAGTGGCGAAGGCGGCTACTGGGCACCAACTGACGCTGAGGCTCGAAAGTGTG  
GGTAG  
>ASV:4094:Family:Lachnospiraceae  
TACGTAGGGGGCAAGCGTTATCCGGATTTACTGGGTGTAAGGGTGCCTAGGCGGCTGAAAAGTCGGATGTGAAATCCC  
CGTGTAAACATGGGAGCTGCATTCGAAACTTTCGGACTTGTAGTGTGCGAGAGGTAAAGCGGAATTCCTGGTGTAGCGGTG  
AAATGCGTAGATATTAGGAGGAACACCAGTGGCGAAGGCGGCTTACTGGACGATTACTGACGCTGAGGCTCGAAAGCGTG  
GGTAG  
>ASV:4095:Genus:Ruminococcaceae\_UCG-014  
TACGTAGGGAGCAAGCGTTATCCGGATTTATTGGGTGTAAGGGTGCCTAGACGGGAAATTAAGTTAGTTGTGAAAGCCC  
TCGGCTTAACGTAGGAATTGCAACTAAAAGTGGTTTTCTTGTAGTGCAGGAGAGGTAAGTGAATTCCTAGTGTAGCGGTG  
AAATGCGTAGATATTAGGAGGAACACCAGTGGCGAAGGCGACTTACTGGACTGTAACGACGTTGAGGCTCGAAAGCGTG  
GGGAG  
>ASV:4096:Family:Lachnospiraceae  
TACGTAGGGGGCAAGCGTTATCCGGATTTACTGGGTGTAAGGGAGCGTAGACGGTATTGCAAGTCTGAAGTGAATCCC  
GGGGCTCAACCCCGGAGCTGCTTTGAAACTGTAAAAGTGTGCTGGAGAGGTAAGCGGAATTCCTAGTGTAGCGGTG  
AAATGCGTAGATATTAGGAGGAACACCAGTGGCGAAGGCGGCAACTGGGCTTTACTGACGCTGAGGCTCGAAAGTGTG  
GGGAG

>ASV:4097:Genus:Prevotella\_9  
TACGGAAGGTCGGGGCTTATCCGGATTTATTGGGTTAAAGGGAGCGTAGGCCGGAGATTAAGCGTGTGTGAAATGTA  
GAGGCTCAACCTCTGCACTGCAGCGCAACTGGTTTCCTTGTAGTACGCACAAAGTGGCGGAATTCGTGGTGTAGCGGTG  
AAATGCTTAGATATCAGGAGGAATATCGGTGGCGTAAGCGCTTTACTGGGCCGTAATTGACGCTGAGGAACGAAAGCCAG  
GGTAG

>ASV:4098:Genus:Sutterella  
TACGGAGGGTCAAGCGTTAATCGGAATAACTGGGCGTAAAGCGTGCAGGCGGTTCTGTAAGACAGATGTGAAATCCC  
CGGGCTCAACCCGGGACTGCATTTGAACTGTCTAGCTAGAGTGCAGGAGGGTGAATTCCTAGTGTAGCGGTG  
AAATGCTTAGATATCAGGAAGAACTCCGATTGCGAAGGCAGCTCACTGGAGGCCAACTGACGCTGAAGCTCGAAAGTGGC  
GGTAT

>ASV:4099:Genus:Parasporobacterium  
TACGTAGGGGGCAAGCGTTATCCGGATTTACTGGGTGTAAGGGAGCGTAGGTGGCAAGCAAGTCAGATGTGAAAACCC  
GGAGCTCAACCCGGGACTGCTTTGAACTGTCTAGCTAGAGTGCAGGAGGGTAAGTGAATTCCTAGTGTAGCGGTG  
AAATGCATAGATATGGCGAAGAACTCCGATTGCGAAGGCAGCTGACGGGTGCGTAAGTACGCTCATGCTCGAAAGTGGC  
GGTAT

>ASV:4100:Family:Lachnospiraceae  
AACGTAGGTCACAAGCGTTGTCCGGAATTACTGGGTGTAAGGGAGTGTAGGTGGCCATGCAAGTCAGAAGTAAAATCC  
GGGGCTCAACCCGGGACTGCATTTGAACTGTCTAGCTAGAGTGCAGGAGGGTGAAGTGAATTCCTAGTGTAGCGGTG  
AAATGCTTAGATATCGGGAGGAACACCAGTGGCGAAGGCGGCTGCTGGACGACAACTGACGCTGAGGCGCAAGCGTG  
GGGAG

>ASV:4101:Phylum:Firmicutes  
TACGTAGGGGGCAAGCGTTGTCCGGAATTATTGGGCGTAAAGGGTGCCTAGGCGGCCGATCAAGTCAGGTGTGAAAGACC  
CGTGCTTAACATGGGGTTGCACTTTGAACTGTCTAGCTAGAGTGCAGGAGGGTGAAGTGAATTCCTAGTGTAGCGGTG  
AAATGCTTAGATATCGGGAGGAACACCAGTGGCGAAGGCGGCTGCTGGACGACAACTGACGCTGAGGCGCAAGCGTG  
GGTAG

>ASV:4102:Genus:Paraprevotella  
TACGGAAGATGCGAGCGTTATCCGGATTTATTGGGTTAAAGGGAGCGTAGGCGGGCTTTTAAAGTCAGCGGTCAAATGT  
GTGGCTCAACCATGTCAAGCGTTGAACTGTCTAGCTAGAGTGCAGGAGGGTGAAGTGAATTCCTAGTGTAGCGGTG  
AATGCTTAGATATGAGGAACACCAGTGGCGAAGGCGACTTTCTGGACGAAACTGACGCTGAGGCGCAAGCGTG  
GGAGC

>ASV:4103:Family:Lachnospiraceae  
TACGTAGGGGGCAAGCGTTATCCGGATTTACTGGGTGTAAGGGAGCGTAGACGGCAGTGAAGTCTGAAGTAAAAGCC  
GGGGCTCAACCCGGTACTGCTTTGAACTGTCTAGCTAGAGTGCAGGAGGGTGAAGTGAATTCCTAGTGTAGCGGTG  
AAATGCTTAGATATCAGGAAGAACTCCGATTGCGAAGGCAGCTGCTAAGTGCACATGACATTGAGGCTCGAAAGTGT  
GGTAT

>ASV:4104:Family:Lachnospiraceae  
TACGTAGGGGGCAAGCGTTATCCGGATTTACTGGGTGTAAGGGTGCCTAGGTGGTATGGCAAGTCAGATGTGAAAGGCC  
GGGGCTCAACCCGGAGCTGCATTTGAACTGTCTAGCTAGAGTGCAGGAGGGCAGGCGGGATTCTAGTGTAGCGGTG  
AAATGCTTAGATATTAGGAGGAACACCAGTGGCGAAGGCGGCTGCTGGACGATGACTGACGTTGAGGCTCGAAAGCGTG  
GGGAG

>ASV:4105:Genus:Anaerofilum  
TACGTAGGTGGCAAGCGTTGTCCGGAATTACTGGGTGTAAGGGAGCGCAGGCGGAAGTGAAGTGGATGTCAAATCTA  
CGGGCTCAACCCGTATACGATTCAAAGTGCAGGTTCTTGTAGTGCAGAGGTAGGCGGAATTCCTAGTGTAGCGGTG  
AATGCTTAGATATCGGGAGGAACACCAGTGGCGAAGGCGGCTACTGGGCACCAACTGACGCTGAGGCTCGAAAGCATGG  
GTAGC

>ASV:4106:Order:Mollicutes\_RF39  
TACGTAGGGGGCGAGCGTTATCCGGATTTATTGGGCGTAAAGAGTTCGTAGGCGGTTTGTAAAGTCTAAGATTTAAGCC  
GAGGCTTAACCTCGTTCTTTTAAAGTGCAGACTTGTAGTGTGGTAGAGGCAAGTGAATTTCTAGTGTAGCGGTG  
AATGCTTAGATATTAGGAGGAACACCAGTGGCGAAGGCGGCTGCTGGGCCATTACTGACGCTGAGGAACGAAAGCGTG  
GGAGC

>ASV:4107:Genus:Intestinimonas  
TACGTAGGTGGCAAGCGTTATCCGGATTTACTGGGTGTAAGGGCGTGTAGGCGGACTGCAAGTCAGATGTGAAAATTA  
TGGGCTCAACCCATAACCTGCATTTGAACTGTAGTCTTGTAGTGCAGGAGGGTGAAGTGAATTCCTAGTGTAGCGGTG  
AAATGCTTAGATATTAGGAGGAACACCAGTGGCGAAGGCGGCTCAACTGGACGATAACTGACGCTGAGGCGCAAGCGTG  
GGGAG

>ASV:4108:Species:amycolatium/jeikeium/lactis/urealyticum/vitaeruminis  
TACGTAGGGTGCAGCGTTGTCCGGAATTACTGGGCGTAAAGAGCTCGTAGGTGTTTGTCCGCTCGTCTGTGAAATCC  
GGGGCTTAACCCGGGCGTGCAGGCGATACGGGCATAACTTGTAGTGTAGGGGAGACTGGAATTCCTGGTGTAGCGGT  
GAAATGCGCAGATATCAGGAGGAACACCAGTGGCGAAGGCGGCTCTGGGCAGTAACTGACGCTGAGGAGCGAAAGCAT  
GGGGA

>ASV:4109:Genus:Actinomyces  
TACGTAGGGTGCAGCGTTGTCCGGAATTATTGGGCGTAAAGGGCTTGTAGGCGGTTTGTCCGCTGCAATCCCT  
CTGGCTTAACCTGGGGCGTGCAGGTTGGTACGGCAAGCTTGTAGTGCAGGAGGGTGAAGTGAATTCCTGGTGTAGCGGTG  
GAATGCGCAGATATCAGGAAGAAACACCAGTGGCGAAGGCGGCTCTGCGGCTTACTGACGCTGAGGAGCGAAAGCGTG  
GGGAG

>ASV:4110:Species:defectiva  
TACGTAGGTGGCAGCGTTGTCCGGAATTATTGGGCGTAAAGGGAGTGTAGGCGGCTTTTAAAGTCTGATGTGAAAGCC  
ACGGCTCAACCGTGGAGGGTCAATGAACTGGGAGACTTGTAGTGCAGGAGGAGGAGCGGAATTCATGTGTAGCGGTG

AAATGCGTAGATATATGGAGGAACACCAGTGGCGAAGGCGGCTCTCTGGTCTGTAAGTACGCTGAGGCTCGAAAGCGTG  
GGGAG  
>ASV:4111:Genus:Roseburia  
TACGTATGGTGCAAGCGTTATCCGGATTTACTGGGTGTAAGGGTGCCTAGACGGTTTTGCAAGTCTGAAGTAAAAGCCC  
GGGGCTCAACCCGGTACTGCATTGAAAAGTGGTATCTAGAGTGTCCGGAGGGTAAGTGAATTCTAGTGTAGCGGTG  
AAATGCGTAGATATTAGGAGGAACACCAGTGGCGAAGGCGGCTTACTGGACGATAACTGACGCTGAGGCTCGAAAGCGTG  
GGGAG  
>ASV:4112:Family:Lachnospiraceae  
TACAGAGGTCTCAAGCGTTGTTCCGAATCACTGGGCGTAAAGCGTGCCTAGGCTGTTTCGTAAGTCTGTGTGAAAAGCCC  
GGGGCTCAACCCGGGACTGCTTTGAAAAGTGTCTGCTAGAGTGTCCGGAGAGGTAAGTGAATTCTAGTGTAGCAGTG  
AAATGCGTAGATATTAGGAGGAACACCAGTGGCGAAGGCGGCTTACTGGACAGTAACTGACGTTGAGGCTCGAAAGCGTG  
GGGAG  
>ASV:4113:Genus:Dielma  
TACGTAGGTGGCAAGCGTTATCCGGAATTATTGGGCGTAAAGGGTGCCTAGGCGGAGATAAGTCTGAGGTAAAAGCCC  
GTGGCTCAACACCGTAAGCCTTGAAAAGTGTCTGGTGGAGTGCAGGAGAGGACAATGGAATTCATGTGTAGCGGTAA  
AATGCGTAGATATATGGAGGAACACCAGTGGCGAAGGCGGTTGTCTGCCTGTAAGTACGCTGAAGCACGAAAGCGTG  
GGAGC  
>ASV:4114:Species:rhamnosivorans  
TACGTAGGGGGCAAGCGTTATCCGGAATTACTGGGTGTAAGGGTGCCTAGGTTGCATGATAAGTCAAGTAAAAGCCC  
GGGGCTTAACCCGGGACTGCTTTGAAAAGTGTAACTGCTAGAGTGCAGGAGAGGTAAGCGGAATTCCTAGTGTAGCGGTG  
AAATGCGTAGATATTAGGAGGAACACCAGTGGCGAAGGCGGCTTACTGGACTGTCACTGACACTGAGGCACGAAAGCGTG  
GGGAG  
>ASV:4115:Family:Lachnospiraceae  
TACGTATGGAGCAAGCGTTATCCGGATTTACTGGGTGTAAGGGAGCGTAGACGGCGAAGCAAGTCTGAAGTAAAAGCCC  
AGGGCTCAACCTGGGACTGCTTTGAAAAGTGTCTGCTAGAGTGTCCGGAGAGGTAAGTGAATTCTAGTGTAGCGGTG  
AAATGCTTAGATATACGAAGAAGTCCGATTGCGAAGGCAGCTTACTGGACTGTAAGTACGCTGATGCTCGAAAGTGTG  
GGTAT  
>ASV:4116:Genus:Oscillibacter  
TACGTAGGTGGCAAGCGTTGTCCGGATTTACTGGGTGTAAGGGCGTGCAGCCGGCCGGCAAGTCAAGTGTGAAATCTG  
GAGGCTTAACCTCAAAGTGCATTTGAAAAGTGTAGGTCTTGGAGTACCAGGAGAGGTTATCGGAATTCCTGTGTAGCGGTG  
AAATGCGTAGATATCGGAAGAAGTCCGATTGCGAAGGCAGCTGCTAAGCTGCAACTGACATTGAGGCTCGAAAGTGTG  
GGTAT  
>ASV:4117:Family:Lachnospiraceae  
TACGTAGGGGGCAAGCGTTATCCGGATTTACTGGGTGTAAGGGAGCGTAGACGGTAAAGCAAGTCTGAAGTAAAAGCCC  
GCGGCTCAACTGCGGACTGCTTTGAAAAGTGTAACTGGAGTGTCCGGAGAGGTAAGTGAATTCCAAGTGTAGCAGTG  
AAATGCGTAGATATACGAAGAAGTCCGATTGCGAAGGCAGCTCACTAGACTGCAACTGACACTGATGCTCGAAAGTGTG  
GGTAT  
>ASV:4118:Genus:Allisonella  
TACGTAGGTGGCAAGCGTTGTCCGGAATTATTGGGCGTAAAGCGCGCAGGCGGCCGTGCAAGTCCATCTTAAAAGCGT  
GGGGCTTAACCCATGAGGGGATGAAAAGTGCATGGCTGGAGTGTCCGGAGGGGAAAAGTGAATTCTAGTGTAGCGGTGA  
AATGCGTAGATATTAGGAGGAACACCAGTGGCGAAGGCGGCTTTCTGGACGACAACTGACGCTGAGGCGGAAAAGCCAGG  
GGAGC  
>ASV:4119:Family:Lachnospiraceae  
TACGTAGGGGGCAAGCGTTATCCGGATTTACTGGGTGTAAGGGAGCGTAGACGGCACGGCAAGCCAGATGTGAAAACCC  
AGGGCTCAACCTGGGACTGCTTTGAAAAGTGTCTGCTAGAGTGTCCGGAGAGGTAAGTGAATTCTAGTGTAGCGGTG  
AAATGCGTAGATATTGGGAGGAACACCAGTGGCGAAGGCGCCTTTCTGGACTGTGTCTGACGCTGAGATGCGAAAGCCAG  
GGTAG  
>ASV:4120:Family:Ruminococcaceae  
TACGTAGGTGGCAAGCGTTGTCCGGATTTACTGGGTGTAAGGGCGTGCAGGCGGTTGTTAAGTCAAGTGGTAAAATACC  
GGAGCTCAACTCCGGGCTGCCATTGAAAAGTGGGCGACTTGAAGTGCAGGAGAGGAAAAGCGGAATTCCTAGTGTAGCGGTG  
AAATGCGTAGATATTAGGAGGAACACCAGTGGCGAAGGCGGCTTTCTGGACTGTAAGTACGCTGAGGCGGAAAAGCGTG  
GGGAG  
>ASV:4121:Order:Bacteroidales  
TACGTAGGGAGCAAGCGTTATCCGGATTTATTGGGTGTAAGGGTGCCTAGACGGGAGAAACAAGTATGTTGAAAAGCCC  
TCGGCTTAAGTGAAGAACTGCAACTAAAAGTATTTTTCTTGGAGTACAGTAGAGGTGGGCGGAATTCGTGGTGTAGCGGTG  
AAATGCTTAGATATACGAAGAAGTCCGATTGCGAAGGCAGCTCACTAGACTGCAACTGACACTGATGCTCGAAAGTGTG  
GGTAT  
>ASV:4122:Genus:Ruminiclostridium\_6  
TACGTAGGTGGCAAGCGTTGTCCGGAATTACTGGGTGTAAGGGAGTGTAGGCGGGATCAAGTCAAGTGAAGTAAAATTA  
CGGGCTCAACTCGTAACCTGCTTTGAAAAGTGAATCTTGGAGTGAAGTGGAGGCAAGCGGAATTCCTAGTGTAGCGGTG  
AAATGCGTAGATATTAGGAGGAACACCAGTGGCGAAGGCGGATTGCTGGACGACAACTGACGCTGAGGCGGAAAAGCGTG  
GGGAG  
>ASV:4123:Genus:Ruminococcaceae\_UCG-003  
TACGTAGGGGGCAAGCGTTGTCCGGATTTACTGGGTGTAAGGGCGTGCAGCCGGGCATGCAAGTCAAGTGTGAAATCTC  
AGGGCTTAACCTGAAAAGTGCATTTGAAAAGTGTATGTCTTGGAGTGCAGGAGAGGTAATCGGAATTCCTGTGTAGCGGTG  
AAATGCTTAGATATACGAAGAAGTCCGATTGCGAAGGCAGCTGCTAAGCTGCAACTGACATTGAGGCTCGAAAGTGTG  
GGTAT  
>ASV:4124:Family:Lachnospiraceae



TACGGAGGATCCGAGCGTTATCCGGATTTATTGGGTTTAAAGGGAGCGTAGGTGGACAGTTAAGTCAGTTGTGAAAATTT  
GCGGCTCAACCGTAAAATTGCACTTAAAAGTGTCCGACTAGAGTGCCGGAGAGGTAAGTGGAATTCCTAGTGTAGCGGTG  
AATGCGTAGATATTAGGAGGAACACCAGTGGCGAAGGCGGCTTACTGGACGGTAACGACGCTGAGGCTCGAAAGCGTG  
GGGAG

>ASV:4125:Family:Ruminococcaceae

TACGGAGGATCAAGCGTTATCCGGATTTATTGGGTTTAAAGGGAGCGCAGGCGGTGCGGCAAGTCAGATGTGAAATCCA  
CGGGCTTAACTCGTGAAGTGCATTTGAAACTACTTTTCTTGGATATCGGAGAGGCAATCGGAATTCCTAGTGTAGCGGTG  
AATGCGTAGATATAAGGAAGAACACCAGTGGCGAAGGCGGATTACTGGACGGTAACGACGCTGAGGCGCGAAAGCGTG  
GGGAG

>ASV:4126:Family:Ruminococcaceae

TACGTAGGTGGCAAGCGTTGTCCGGATTTACTGGGTGTAAGGGCGGTAGGCGGAGATGCAAGTCAGATGTGAAATCCT  
CGGGCTTAAACCGGGAAGTGCATTTGAAACTGTGGTCTTGGAGTGAAGTAGAGGTAAGCGGAATTCCTAGTGTAGCGGTG  
AATGCGTAGAGATGGGAGGAACACCAGTGGCGAAGGCGGCTTCTGGCTTAACTGACGCTGAGGCTCGAAAGTGTG  
GGTAG

>ASV:4127:Family:Streptococcaceae

TACGTAGGTCCCGAGCGTTGTCCGGATTTATTGGGCTTAAAGGGAGCGCAGGCGGTGCGGAAAGTCTGGAGTAAAAGGCT  
ATGGCTCAACCATAGTGTGCTCTGAAACTGTCTGACTTGGAGTGCAGAGGGGAGAGTGAATTCATGTGTAGCGGTGA  
AATGCGTAGATATATGAAGAACACCAGTGGCGAAGGCGGCTTCTGGACTGTAACGACGTTGAGGCTCGAAAGTGTG  
GTAGC

>ASV:4128:Family:Lachnospiraceae

TACGGAGGATGCGAGCGTTATCCGGATTTATTGGGTTTAAAGGGAGCGCAGGCTGCGAGGCAAGTCAGCGGTCAAATGTC  
GGGGCTCAACCCGGAAGTGCATTTGAAACTGTCTGGGCTTGGAGTGCAGGAGAGGTAAGCGGAATTCCTAGTGTAGCGGTG  
AATGCGTAGATATTAGGAGGAACACCAGTGGCGAAGGCGGCTTACTGGACTGAAACTGACACTGAGGCTCGAAAGCGTG  
GGGAG

>ASV:4129:Order:Mollicutes\_RF39

TACGTAGGGAGCGAGCGTTATCCGGATTTATTGGGTGTAAGCGTGTGTAGGCGGTTTTATAAGTCTAGGGTCTAAGCCC  
GGAGCTCAACTCCGGTTCGCTTGGAAACTGTAAAGTGTGAGTTGGTAGAGGTAAGTGAATTCCTAGTGTAGCGGTGA  
AATGCGTAGATATTAGAAGGAACACCAGTGGCGAAGGCGATTACTGGCCAACTGACGCTGAGACACGAAAGCGTGG  
GTAGC

>ASV:4130:Species:freiburgense/provencense/terpenotabidum/variable

TACGTAGGGTGCAGCGTTGTCCGGAATTTACTGGGCTTAAAGAGCTCGTAGGTGGTTTGTCCGCTGCTGTGAAATCC  
GGGGCTTAACTCCGGGCTGCAAGCGGATACGGGCATAACTTGGAGTGTAGGGGAGACTGGAATTCCTGGTGTAGCGGT  
GAAATGCGCAGATATCAGGAGGAACCCGATGGCGAAGGCGAGTCTCTGGGCAGTAACTGACGCTGAGGAGCGAAAGCAT  
GGTA

>ASV:4131:Kingdom:Bacteria

TACGGAGGATCCGAGCGTTATCCGGATTTATTGGGTTTAAAGGGAGCGCAGGCTGCGAGGCAAGTCAGCGGTCAAATGTC  
GGGGCTCAACCCGGGCTGCTTTGAAACTGTCCGCTAGAGTTCGAGTGAAGTATGCGGAATTCGCTTGTGTAGCGGTGA  
AATGCGTAGAGATCTGGAGGAATACCGGTGGCGAAGGCGGCCCTGGACGAAGACTGACGCTCAGGTGCGAAAGCGTGG  
GGAGC

>ASV:4132:Genus:Ruminiclostridium\_5

TACGTAGGGGGCAAGCGTTGTCCGGATTTACTGGGTTTAAAGGGAGCGTAGACGGCGCAGCAAGTCTGATGTGAAAGGCA  
GGGGCTTAAACCCGACTGCTTTGAAACTGCAAGACTTGAAGTGAAGTAGAGGTAAGCGGAATTCCTGGTGTAGCGGTG  
AATGCGTAGAGATCGGAGGAACACCAGTGGCGAAGGCGGCTTACTGGCTTAACTGACGCTGAGGCACGAAAGCATG  
GGTAG

>ASV:4133:Genus:Lachnospiraceae\_UCG-010

TACGTAGGGAGCGAGCGTTATCCGGAATTTACTGGGTGTAAGGGTGAAGGGTGAAGGGTGAAGGGTGAAGGGTGAAGGG  
GAGGCTTAACTCCGGGCTGCTTTGAAACTGCAAGACTTGAAGTGAAGTAGAGGTAAGCGGAATTCCTAGTGTAGCGGTG  
AATGCTTAGATATCAGGAAGAACTCCGATTGCGAAGGCGAGTCACTAGACTGCTACTGACACTGATGCTCGAAAGTGTG  
GGTAT

>ASV:4134:Genus:Sellimonas

TACGTAGGGGGCAAGCGTTATCCGGATTTACTGGGTGTAAGGGAGCGTAGACGGCATTGCAAGTCTGGAGTAAAACCC  
GGGGCTCAACCCGGGACTGCTTTGAAACTGCAAGTCTAGAGTGCCGGAGAGGTAAGCGGAATTCCTAGTGTAGCGGTG  
AATGCGTAGATATTAGGAGGAACACCAATGGCGAAGGCGAGTCTCTGGGCCGTTACTGACGCTGAGGAGCGAAAGCGTG  
GGGAG

>ASV:4135:Species:albus/aridicollis/komagatae

TACGTAGGGTGCAGCGTTGTCCGGAATTTATTGGGCTTAAAGAGCTCGTAGGCGGCTTGTCCGCTGCTGTGAAATCCC  
GGGGCTCAACCCGGGCTGCAAGTGGGTACGGGCAAGCTAGAGTGGCGTAGGGGAGATTGGAATTCCTGGTGTAGCGGTG  
GAATGCGCAGATATCAGGAGGAACACCAGTGGCGAAGGCGAGTCTCTGGGCCGTTACTGACGCTGAGGAGCGAAAGCATG  
GGGAG

>ASV:4136:Family:Lachnospiraceae

TACGGAGGATCCGAGCGTTATCCGGATTTATTGGGTTTAAAGGGAGCGTAGATGGATGTTTAAAGTCAGTTGTGAAAATTT  
GCGGCTCAATCCGGGACTGCATTTGAAACTGCCCGTCTTGGAGTGGCGGAGAGGTAAGCGGAATTCCTAGTGTAGCGGTG  
AATGCGTAGATATTAGGAGGAACACCAGTGGCGAAGGCGGCTTACTGGACGGTAACGACGCTGAGGCTCGAAAGCGTG  
GGGAG

>ASV:4137:Genus:Erysipelotrichaceae\_UCG-003

TACGGAGGATCCGAGCGTTATCCGGAATTTATTGGGCTTAAAGAGGGAGCGGCGACTAAGGGTCTGTGGTAAAAGATC  
GAAGCTTAACTCGGTAAGCCATGAAACCGTAGAGCTAGAGTGTGTGAGAGGATCGTGAATTCATGTGTAGCGGTGA  
AATGCGTAGATATATGAAGAACACCAATGGCGAAGGCGAGTCTCTGGGCCGTTACTGACGCTGAGGAGCGAAAGCGTGG

GGAGC  
>ASV:4138:Family:Ruminococcaceae  
AACGTAGGTCACAAGCGTTGTCCGGAATTACTGGGTGTAAGGGAGCGCAGGCGGGAAGACAAGTTGGAAGTAAAATCTA  
TGGGCTCAACCATAAACTGCTTTCAAACCTGTTTTCTTGGAGTAGTGCAGAGGTAGGCAGAATTCCTAGTGTAGCGGTG  
AAATGCGTAGAGATTAGGAAGAACCACCGTGGCGAAGGCGACTTTCTGGACGAAAACGACGCTGAGGCGCAAAGCGTG  
GGGAG  
>ASV:4139:Genus:Oscillibacter  
TACGGAGGATCCAAGCGTTATCCGGAATTACTGGGTGTAAGGGCGTGCAGCCGGGCCGCAAGTCAGATGTAAAATCTG  
GAGGCTTAACCTCAAACCTGCAATTTGAAACTGTAGTCTTGGAGTACCAGGAGAGGTTATCGGAATTCCTTGTGTAGCGGTG  
AAATGCGTAGATATTAGGAGGAACACCAGTGGCGAAGGCGCCTGCTGGACTGTTACTGACACTGAGGCACGAAAAGCGTG  
GGGAG  
>ASV:4140:Genus:Sellimonas  
TACGTAGGGGGCAAGCGTTATCCGGAATTACTGGGTGTAAGGGAGCGTAGACGGATAGGCAAGTCTGGAGTAAAACCC  
AGGGCTCAACCCTGGGACTGCTTTGAAAACCTGCAGATCTGGAGTGCCGGAGAGGTAAGCGGAATTCCTAGTGTAGCGGTG  
AAATGCGTAGATATTAGGAGGAACACCAGTGGCGAAGGCGCCTGCTGGACTGTTACTGACACTGAGGCACGAAAAGCGTG  
GGGAG  
>ASV:4141:Genus:Desulfovibrio  
TACGGAGGGTGCAAGCGTTAATCCGGAATCACTGGGCGTAAAGCGCATGTAGGCTGCTAGATAAGTCAGCGGTAAAAGCC  
ACGGCTCACCCGTGGAACCTGCCGTTGATACTGCTGGCTTGGAGTCTGTGAGAGGATAGTGAATTCAGGTGTAGGGGTG  
AAATCGTAGAGATCTGGAGGAACATCAGTGGCGAAGGCGACTATCTGGTGCAGTACTGACGCTGAGATGCGAAAAGCGTG  
GGAT  
>ASV:4142:Order:Clostridiales  
TACGGAGGGTGCAAGCGTTAATCCGGAATTACTGGGCGTAAAGCGCACGACGAGCGGTTTGTAAAGTCCGATGTAAAATCC  
CGGGCTCAACCTGTGGACTGCATTGAAAACCTGCATACTTGGAGTCCGGAGGGGTAAGCGGAATTCCTAGTGTAGCGGTG  
AAATGCGTAGATATTAGGAGGAACACCAGTGGCGAAGGCGCCTTCTGGACGATGACTGACGTTGAGGCTCGAAAAGCCAG  
GGGAG  
>ASV:4143:Genus:Anaerotruncus  
TACGTAGGGAGCGAGCGTTGTCCGGAATTACTGGGTGTAAGGGAGCGTAGGCGGGTGGAAGTAGAATGTAAAACAG  
CCGGCTCAACTGTTGTTGCGTTCTAAACTGCCGTTCTTGGAGTGAAGTAGAGGCAGGCGGAATTCCTAGTGTAGCGGTG  
AATGCGTAGATATTAGGAGGAACACCAGTGGCGAAGGCGCCTGCTGGGCTTAACTGACGCTGAGGCTCGAAAAGCGTG  
GGAGC  
>ASV:4144:Genus:Anaerofilum  
TACGGAGGGGGCAAGCGTTATCCGGAATTACTGGGTGTAAGGGAGCGTAGACGGACTGGAAGTCTGATGTAAAAGCGG  
GGGGCTCAACCTGTGGACTGCTTTCAAACCTGGTCTTGGAGTAGTGCAGAGGTAGGCGGAATTCCTGGTGTAGCGGTG  
GAATGCGTAGATATCGGGAGGAACACCAGTGGCGAAGGCGCCTACTGGGCACCAACTGACGCTGAGGCTCGAAAAGCGTG  
GGGAG  
>ASV:4145:Order:Bacteroidales  
TACGGAGGATGCAAGCGTTATCCGGAATTATTGGGTTAAAGGGAGCGCAGGCGGGGATCAAGTTGGAAGTAAAATCCA  
TGGGCTCAACCCATGAACCTGCTTTCAAACCTGGTCTTGGAGTAGTGCAGAGGTAGGCGGAATTCCTGGTGTAGCGGTG  
AAATGCTTAGATATCAGGAAGAACTCCGATTGCGAAGGCGAGCCTGCTAAGCTGCAACTGACATTGAGGCTCGAAAAGTGTG  
GGTAT  
>ASV:4146:Genus:Christensenellaceae\_R-7\_group  
TACGTAGGGGGCAAGCGTTGTCCGGAATAATTGGGCGTAAAGGGCGCGTAGGCGGCTCGGTAAGTCTGGAGTAAAAGTCC  
TGCTTTAAAGTGGGAATTGCTTTGGATACTGTCGGGCTTGGAGTGCAGAGAGGTTAGTGAATTCAGTGTAGCGGTG  
AAATGCGTAGATATGTTGAAGAACCACCGATGGCGAAGGCGAGCCTCTGGGACATAACTGACGCTCAGGCACGAAAAGCGTG  
GGAGC  
>ASV:4147:Family:Ruminococcaceae  
TACGTAAGTGGCAAGCGTTGTCCGGAATTACTGGGTGTAAGGGAGCGCAGGCGGGATAGCAAGTCAGCTGTGAAAACCTA  
TGGGCTCAACCATAAACTGCAAGTGAACCTGTTATCTTGGAGTGGAGTAGAGGCAAGCGGAATTCAGTGTAGCGGTG  
AAATGCGTAGATATCAGGAAGAACTCCGATTGCGAAGGCGAGCCTGCTAAGCTGCAACTGACATTGAGGCTCGAAAAGTGTG  
GGTAG  
>ASV:4148:Genus:Bacteroides  
TACTTCTTCTCTCTCTTTCTCTTTCTTTCTTTTAAAGGGAGCGTAGATGGATGTTAAAGTCAGTTGTGAAAAGTTT  
GCGGCTCAACCCTGAAATGCAAGTGTACTGGATATCTTGGAGTGCAGTTGAGGCAGGCGGAATTCCTGGTGTAGCGGTG  
AAATGCTTAGATATCAGGAAGAACTCCGATTGCGAAGGCGAGCCTGCTAAGCTGCAACTGACATTGAGGCTCGAAAAGTGTG  
GGTAT  
>ASV:4149:Genus:Lactobacillus  
TACGTAGGTCACAAGCGTTGTCCGGAATTACTGGGTGTAAGGGAGCGCAGGCGGAATGATAAGTCTGATGTAAAAGCCC  
ACGGCTCAACCGTGAACCTGCATCGGAACTGTCATTCTTGGAGTGCAGAAAGAGGAGTGAATTCATGTGTAGCGGTG  
GAATGCGTAGATATGTTGAAGAACCACCGTGGCGAAGGCGCCTCTGGTCTGCAACTGACGCTGAGGCTCGAAAAGCATG  
GGTAG  
>ASV:4150:Genus:Dialister  
TACGTAGGTGGCAAGCGTTGTCCGGAATTATTGGGCGTAAAGCGCGCAGGCGGCTTCCCAAGTCCCTCTTAAAAGTGC  
GGGGCTTAACCCGTGATGGGAAGGAACTGGGAAGCTGGAGTATCGGAGAGGAAAGTGAATTCCTAGTGTAAACGGTGA  
AATGCTTAGAGATCATAAGAACACCAGTGGCGAAGGCGAGCTTACCAAACTATATCTGACGTTGAGGCACGAAAAGCGTG  
GGAGC  
>ASV:4151:Genus:Lactonifactor  
TACGGAGGATCCAAGCGTTATCCGGAATTACTGGGTGTAAGGGAGCGTAGACGGCAGTGAAGTCTGAAGTAAAAGCCC

GGGGCTCAACCCCGGACTGCTTTGAAACTGTGCAGCTAGAGTGTCGGAGAGGCAAGCGGAATTCCTAGTGTAGCGGTG  
AAATGCTTAGATATCACGAAGAAGCTCCGATTGCGAAGGCAGCTTACTGGACTGTAACGACGCTGATGCTCGAAAGTGTG  
GGTAT

>ASV:4152:Phylum:Bacteroidetes

TACGTAGGGAGCGAGCGTTATCCGGAATTATTGGGTGTAAGGGTGCAGCAGCGGGAGAACAAAGTTAGTTGTGAAATACC  
TCGGCTCAACTGAGGAAGTGAACATAAACTGACTTCTTGGAGTACAGTAGAGGCAGCGGAATTCGTGGTGTAGCGGTG  
AAATGCTTAGATATCACGAAGAAGCTCCGATTGCGAAGGCAGCTGCTGGACTGTAACGACGCTTGGAGCTCGAAAGCGTG  
GGGAG

>ASV:4153:Family:Ruminococcaceae

AACGTAGGGTGAAGCGTTGTCCGGATTTACTGGGTGTAAGGGCGCGCAGGCGGGAGAGCAAGTCAGATGTGAAATCTA  
TGGGCTTAACCCATAAACTGCATTTGAAACTGTTTTCTTGGAGTGTGGAGAGGCAAGCGGAATTCCTAGTGTAGCGGTG  
AAATGCTTAGATATCACGAAGAAGCTCAATTGCGAAGGCAGCTGCTGGACTGTAACGACGCTGATGCTCGAAAGTGTG  
GGTAT

>ASV:4154:Family:Coriobacteriales\_Incertae\_Sedis

AACGTAGGTCAACAGCGTTGTCCGGAATCATTGGGCGTAAAGCGCGGTAGGCGGCTTGTAAAGCAGGAATTTAAATCTT  
AGGGCTCAACCTTAAGTCGGTTCCTGAACTGGCAGGCTCGAGTGCAGGTAGAGGAAGGTGGAATTCCTAGTGTAGCGGTG  
AATGCGCAGATATCGGGAAGAACCAATGGCGAAGGCAGGCTCTGGGCGCTACTGACGCTGAGGAGCGAAAGCGGTG  
GGAGC

>ASV:4155:Genus:Butyricicoccus

TACGTAGGGAGCAAGCGTTATCCGGATTTACTGGGTGTAAGGGCGCGCAGGCGGGCGGCAAGTTGGGAGTGAATCCC  
GGGGCTTAACCCCGGAAGTGTCTTCAAACCTGCTGGTCTTGGAGTGTGGAGAGGCAAGCGGAATTCCTGTGTAGCGGTG  
AAATGCGTAGATATTAGGAGGAACACAGTGGCGAAGGCAGCTTGTGGGCTTTTACTGACGCTGAGGCTCGAAAGCGTG  
GGGAG

>ASV:4156:Genus:Anaerostipes

TACGTAGGGGGCAAGCGTTATCCGGAATTTACTGGGTGTAAGGGTGCCTAGGTGGTATGGCAAGTCAGAAGTAAAACCC  
AGGGCTTAACCTCGGGACTGCTTTTGAACCTGTCAGACTGGAGTGCAGGAGAGGTAAGCGGAATTCCTAGTGTAGCGGTG  
AAATGCGTAGATATTAGGAGGAACATCAGTGGCGAAGGCAGCTTACTGGACTGAGACTGACACTGAGGCACGAAAGCGTG  
GGGAG

>ASV:4157:Family:Lachnospiraceae

TACGTAGGGGGCAAGCGTTATCCGGAATTTACTGGGTGTAAGGGAGCGTAGACGGCATGGCAAGCCAGATGTGAAAACCC  
GGGGCTCAACCCCGGACTGCATTTGAAACTGTTTATCTAGAGTGTGGAGAGGTAAGTGGAAATTCCTAGTGTAGCGGTG  
AAATGCGTAGATATTAGGAGGAACACCGTGGCGAAGGCAGCCCTCTGGGCCGAGACGACGCTGAGGCGCGAAAGCTGG  
GGGAG

>ASV:4158:Genus:Lachnospiraceae\_FCS020\_group

TACGTAGGGGGCAAGCGTTATCCGGAATTTACTGGGTGTAAGGGAGCGTAGGTGGCAAGGCAAGCCAGAAGTAAAACCC  
GGGGCTTAACCCCGGATTGCTTTTGAACCTGTCTGGCTGGAGTGCAGGAGGGCAGGCGGAATTCCTAGTGTAGCGGTG  
GAAATGCGTAGATATTAGGAGGAACACCGTGGCGAAGGCAGCCCTGCTGGACTGTAACGACTGAGGCTCGAAAGCGTG  
GGGGA

>ASV:4159:Order:Bacteroidales

TACGTAGGGGGCAAGCGTTATCCGGAATTTACTGGGTGTAAGGGTGCCTAGGTGGCAGTGCAAGTCAGATGTGAAAGGCC  
GGGGCTCAACCTCGGAGCTGCATTTGATACTGGCAGTCTTGGAGTACAGTAGAGGTGGGCGGAATTCGTGGTGTAGCGGTG  
AAATGCTTAGATATCACGAAGAAGCTCCGATTGCGAAGGCAGCTCACTGGACTGCAACTGACACTGATGCTCGAAAGTGTG  
GGTAT

>ASV:4160:Family:Lachnospiraceae

TACGTAGGGAGCGAGCGTTGTCCGGATTTACTGGGTGTAAGGGTGCCTAGGCGGCAAGGCAAGTCTGAAGTAAAAGCCC  
GGTGTAAACGCCGGGACTGCTTTGAAACTGTTTAGCTGGAGTGCAGGAGAGGTAAGCGGAATTCCTAGTGTAGCGGTG  
GAATGCGTAGATATCGGAGGAACACAGTGGCGAAGGCAGCCCTACTGGGCACCAACTGACGCTGAAGCTCGAAAGTGGC  
GGTAT

>ASV:4161:Family:Clostridiales\_vadinBB60\_group

TACGTAGGTGGCAAGCGTTGTCCGGAATGACTGGGCGTAAAGGGTGCCTAGGTGGTCTGTCAAGTTAGCCGTGAAATCC  
GGGGCTCAACTCCGGCGCTACGGCTAAGACTGACGGACTTGGAGTGCAGGAGGGCAAGTGGAAATTCCTAGTGTAGCGGTG  
GAATGCGTAGATATTAGGAGGAACACAGAGGCGAAGGCAGCTTGTGGACTGTAACGACTGACACTGAGGCACGAAAGCGTG  
GGGAG

>ASV:4162:Family:Ruminococcaceae

TACGTAGGGAGCGAGCGTTATCCGGAATTTACTGGGTGTAAGGGCGTGTAGGCGGGAAGGCAAGTCAGATGTGAAAACCTA  
TGGGCTCAACCCATAGCCTGCATTTGAAACTGTTTTCTTGGAGTGTGGAGAGGCAATCGGAATTCCTGTGTAGCGGTG  
AAATGCTTAGATATTACGAAGAAGCTCCGATTGCGAAGGCAGCTGCTAAAGTCAACTGACATTTAGGCTCGAAAGTGTG  
GGTAT

>ASV:4163:Genus:Dielma

TACGTAGGTGGCAAGCGTTATCCGGAATTTATTGGGCGTAAAGGGTGCCTAGGCGGCGAGATAAGTCTGAGGTAAAAGCCC  
GTGGCTCAACACCGTAAGCCTTGGAACTGTCTGGCTGGAGTGCAGGAGAGGACAATGGAATTCATGTGTAGCGGTAA  
AATGCGTAGATATATGGAGGAACACAGTGGCGAAGGTGTTGTTCTGGCCTGTAACGACTGACGCTGAAGCACGAAAGCGTG  
GGAGC

>ASV:4164:Genus:Hydrogenoanaerobacterium

TACGTAGGGAGCGAGCGTTGTCCGGAATTTACTGGGTGTAAGGGAGCGTAGGCGGGAGTGAAGTTGAATGTTTAACTCA  
TGGGCTCAACCCATATCAGCGTTTCAGAACTGCATTTCTTGGAGTGAAGTAGAGTTGGCGGAATTCCTAGTGTAGCGGTG  
AATGCGTAGATATTAGGAGGAACACAGTGGCGAAGGCAGCCAACTGGGCTTTTACTGACGCTGAGGCTCGAAAGCGGTG  
GGAGC

>ASV:4165:Family:Lachnospiraceae  
TACGTATGGAGCAAGCGTTATCCGGATTTACTGGGTGTAAAGGGAGCGTAGACGGCGACACAAGTCTGAAGTAAATACC  
CGGGCTCAACCTGGAACTGCTTTGAAACTGTGTTGCTAGAGTGTGGAGAGGTAAAGCGGAATTCCTAGTGTAGCGGTG  
AAATGCTTAGATATCACGAAGAAGCTCCGATTGCGAAGGCAGCTGCTAAGCTGCAACTGACATTGAGGCTCGAAAGTGTG  
GGTAT

>ASV:4166:Genus:CAG-56  
TACGTAGGGGGCAAGCGTTATCCGGATTTACTGGGTGTAAAGGGAGCGTAGACGGCGAGGCAAGTCTGATGTGAAAACCC  
GGGGCTCAACCCCGTGCAGTTGAAACTGTTTTGCTTGTAGTGCAGGAGAGGTAAAGCGGAATTCCTAGTGTAGCGGTG  
AAATGCTTAGATATCACGAAGAAGCTCCGATTGCGAAGGCAGCTCACTAGACTGTTACTGACACTGATGCTCGAAAGTGTG  
GGTAT

>ASV:4167:Genus:Parabacteroides  
TACGGAGGATCCGAGCGTTATCCGGATTTACTGGGTGTAAAGGGTGCAGTGGCGCCTTTTAAAGTCAAGCGGTGAAAGTCT  
GTGGCTCAACCATAGAAATTGCGTTGAAACTGGGAGCTTGTAGTATGTTTGAGGCGAGCGGAATGCGTGGTGTAGCGGTG  
AAATGCTTAGAGATCATACAGAACCAGATTGCGAAGGCAGCTTACCAAATATATCTGACGTTGAGGCACGAAAGCGTG  
GGGAG

>ASV:4168:Genus:Ruminococcaceae\_UCG-002  
TACGTAGGTGGCAAGCGTTGTCCGGATTTACTGGGTGTAAAGGGCGTGCAGCCGGTCTGCAAGTCAAGTGTGAAATCCA  
TGGGCTCAACCCCGGACTGCGTTGGAACTGTTCCCTTGTAGTATCGGAGAGGCAGGCGGAATTCCTAGTGTAGCGGTG  
AAATGCTTAGATATTAGGAGGAACACCAGTGGCGAAGGCAGATTGCTGGACGATAACTGACGTTGAGGCAGGAAAGTGTG  
GGGAG

>ASV:4169:Order:Bacteroidales  
TACGTATGGAGCAAGCGTTATCCGGATTTACTGGGTGTAAAGGGTGCAGTGGCGAGTCAAGTCAAGTGTGAAAGGCC  
GGGGCTCAACCCCGGACTGCGTTGGAACTGCGTGTCTTGTAGTACAGTTGAGGTAGGCGGAATTCCTGGTGTAGCGGTG  
AAATGCTTAGATATCACGAAGAAGCTCCGATTGCGAAGGCAGCTGCTGGACTGTAAGTCAAGTGTGCTCGAAAGTGTG  
GGTAT

>ASV:4170:Genus:Acidaminococcus  
TACGTAGGGGGCAAGCGTTATCCGGATTTACTGGGTGTAAAGGGAGCGTAGACGGCGCAGCAAGTCTGATGTGAAAGGCA  
GGGGCTCAACCCCGGACTGCGTTGGAACTGCGTGTCTTGTAGTGCAGGAGAGGAAAGGGGAATTCCTAGTGTAGCGGTG  
AAATGCTTAGATATTGGGAGGAACACCAGTGGCGAAGGCAGCTTCTGGACTGTGCTGACGCTGAGATGCGAAAGCCAG  
GGTAG

>ASV:4171:Family:Bifidobacteriaceae  
TACGTATGGTCAAGCGTTATCCGGATTTACTGGGTGTAAAGGGCTCGTAGGCGGTTGCTCGCTCCGGTGTGAAAGTCC  
ATCGCTTAACGGTGGATCCGCGCGGGTACGGGCGGGCTTGTAGTGCAGGAGAGGAAAGGGGAATTCCTGGTGTAGCGGTG  
GAATGCGCAGATATCAGGAAGAACCAGTGGCGAAGGCAGTATCCGGGTGCAACTGACGCTGAGGCTCGAAAGTGTG  
GGTAT

>ASV:4172:Family:Lachnospiraceae  
TACGTATGTCGCAAGCGTTATCCGGATTTACTGGGTGTAAAGGGAGCGTAGACGGTGTGGCAAGTCTGATGTGAAAGGCA  
TGGGCTCAACCTGTGGACTGCATTGAAACTGTCATACTTGTAGTGCAGGAGGGTAAGCGGAATTCCTAGTGTAGCGGTG  
AAATGCTCAGATATCACGAAGAAGCTCCGATTGCGAAGGCAGTATCCGGGTGCAACTGACGCTGAGGCTCGAAAGTGTG  
GGTAT

>ASV:4173:Family:Ruminococcaceae  
TACGTAGGGTCAAGCGTTATCCGGATTTACTGGGTGTAAAGGGAGCGTAGGCGGGATGCAAGTTGAATGTTTAAACTA  
TCGGCTCAACTGATAGTCGCTTCAAACCTGCAACTCTTGTAGTGAAGTAGAGGTAGGCGGAATTCCTAGTGTAGCGGTGA  
AATGCTTAGATATCACGAAGAAGCTCCGATTGCGAAGGCAGCTTACTGGATTGTAAGTCAAGTGTGCTCGAAAGTGTG  
GTATC

>ASV:4174:Genus:Akkermansia  
TACAGAGGTCTCAAGCGTTGTTCCGGAATCACTGGGCGTAAAGCGTGCAGTGGCTGTTTCGTAAGTCTGTGTGAAAGGCG  
CGGGCTCAACCCCGGACGCGACATGATACTGCGAGACTAGAGTAATGGAGGGGAACCGGAATTCGCGGTGTAGCGGTG  
AAATGCTTAGATATCACGAAGAAGCTCCGATTGCGAAGGCAGCTGCTAAGCTGCAACTGACATTGAGGCTCGAAAGTGTG  
GGTAT

>ASV:4175:Family:Ruminococcaceae  
TACGGAGGATCCGAGCGTTATCCGGATTTACTGGGTGTAAAGGGCGTGTAGGCGGGATTGCAAGCCAGATGTGAAAAGT  
GGGGCTCAACCTCCAGCTGCATTGAAACTGTAGTTCTTGTAGTGCAGGAGGCAATCGGATTCCTGTGTAGCGGTG  
AAATGCTTAGATATCACGAGAACTCCGATTGCGAAGGCAGCTTACTAAACCATAACTGACACTGAAGCACGAAAGCGTG  
GGGAT

>ASV:4176:Family:Ruminococcaceae  
TACGTAGGGGGCAAGCGTTATCCGGATTTACTGGGTGTAAAGGGCGTGTAGGCGGGAAGGCAAGTCAAGTGTGAAAAGT  
TGGGCTCAACCCATAGCTGCATTGAAACTGTTTTCTTGTAGTGCAGGAGGCAATCGGAATTCCTGTGTAGCAGTG  
AAATGCTTAGATATTAGGAGGAACACCAGTGGCGAAGGCAGCTTACTGGACAGTAATTGACGTTGAGGCTCGAAAGCGTG  
GGGAG

>ASV:4177:Kingdom:Bacteria  
TACGGAGGATCCGAGCGTTATCAGGATTTATTGGGTGTAAAGGGAGCGTAGGTGGATTGTTAAGTCAAGTGTGAAAGTTT  
GCGGCTCAACCGTAAATGCAAGTTGAAACTGGGAAGCTGGAGTATCGGAGAGGAAAGTGAATTCCTAGTGTAGCGGTG  
AAATGCTTAGAGATTAGGAAGAACCAGTGGCGAAGGCAGCTTCTGGACGAAAAGTCAAGTGTGAGGCTCGAAAGCGTG  
GGGAG

>ASV:4178:Genus:Gemella  
TACGTAGGTGGCAAGCGTTGTCCGGATTTACTGGGTGTAAAGGGCGCGCAGGTGGTTTAAATGAGTCTGATGTGAAAGGCC  
ACGGCTCAACCGTGGAGGGTCAATTGAAACTGTTAACTTGTAGTGCAGGAGAGAAAAGTGAATTCCTAGTGTAGCGGTG

AAATGCGTAGAGATTAGGAGGAACACCAGTGGCGAAGGCGGCTTTTTGGCCTGTAAGTACTGACACTGAGGCGCGAAAGCGTG  
GGGAG  
>ASV:4179:Family:Ruminococcaceae  
TACGTAGGGGGCAAGCGTTATCCGGATTTACTGGGTGTAAGGGTGCCTAGGTGGCAAGCAAGTTGGATGTGAAAACCTG  
TGGGCTCAACCTACAGACTGCATTCAAACCTGTTTTCTTGAGTGAAGTAGAGGCAAGCGGAATTCCTAGTGTAGCGGTG  
AAATGCGTAGATATTAGGAGGAACACCAGTGGCGAAGGCGGCTTCTGGGCTTTAACTGACGCTGAGGCTCGAAAGCGTG  
GGGAG  
>ASV:4180:Species:cerevisiae  
TACGTAGGTGGCAAGCGTTGTCCGGAATCATTGGGCGTAAAGGGCGCGCAGGCGGTTTCGGTAAGTCCGCTTTAAAAGTGC  
GGGGCTTAACCCCGTATGGGATTGAAACTGCCGACTGGAGTGTCCGAGAGGAAAGCAGAATTCCTAGTGTAGCGGTGA  
AATGCGTAGATATTAGGAGGAATACCAGTGGCGAAGGCGGCTTCTGGACGACAACCTGACGCTGAGGCGCGAAAGCCAGG  
GGAGC  
>ASV:4181:Genus:Actinomycetospora  
TACGTAGGGTGCAGCGTTGTCCGGAATTTACTGGGCGTAAAGAGCTCGTAGGCGATGTGTCCGCTCGGCGGTGAAAACCT  
GGGGCTTAACCTGCGGCTGCGGTGATACGGGCATCACTTGTAGTTCGGCAGGGGAGACTGGAATTCCTGGTGTAGCGGT  
GAAATGCGCAGATATCAGGAGGAACACCAGTGGCGAAGGCGGCTTCTGGGCGATACTGACGCTGAGGAGCGAAAGCAT  
GGTA  
>ASV:4182:Order:Clostridiales  
TACGTAGGGGGCAAGCGTTATCCGGATTTACTGGGTGTAAGGGGAGCGTAGACGGTGTGGCAAGTCTGATGTGAAAGGCA  
TGGGCTCAACCTGTGGACTGCATTTGAAACTGTGGTCTTGAGTGAAGTAGAGGTAAGCGGAATTCCTAGTGTAGCGGTG  
AAATGCGTAGATATTAGGAGGAACATCAGTGGCGAAGGCGGCTTACTGGGCTTTAACTGACGCTGAGGACGAAAGCGTG  
GGGAG  
>ASV:4183:Family:Ruminococcaceae  
TACGTAGGTGGCAAGCGTTGTCCGGAATTTACTGGGTGTAAGGGTGCAGGCGGGTAGTCAAGTTGGATGTGAAAACCTA  
TGGGCTTAACCCATAGACTGCATCTAAAACCTGATTATCTTGAGTGAAGTAGAGGCAAGCGGAATTCCTAGTGTAGCGGTG  
GAATGCGTAGATATTGAGGGAACACCAGTGGCGAAGGCGGCTTCTGGGCTTTAACTGACGCTGAGGACGAAAGCATG  
GGGAG  
>ASV:4184:Family:Lachnospiraceae  
TACGTAGGGGGCAAGCGTTATCCGGATTTACTGGGTGTAAGGGGAGCGCAGGCGGCGCAGTAAGTCAGAAGTAAAGCCC  
GGGGCTTAACCCGGGACTGCTTTTAAAACCTGCCGTCTTATTTCAGGAGAGGCAAGCGGAATTCCTAGTGTAGCGGTG  
AAATGCGTAGATATTAGGAGGAACACCAGTGGCGAAGGCGGCTTCTGGACTGATAATGACGCTGAGGCTCGAAAGCGTG  
GGGAG  
>ASV:4185:Family:Lachnospiraceae  
TACGGAGGATCCGAGCGTTATCCGGATTTACTGGGTGTAAGGGGAGCGTAGACGGCGCAGCAGGTCTGATGTGAAAGGCA  
GGGGCTTAACCCCTGACTGCATTGAAAACCTGCTGTCTTGTAGTGCAGGAGGGTAAGCGGAATTCCTAGTGTAGCGGTG  
AAATGCTTAGATATCACGAAGAACCTCCGATTGCGAAGGCAGCCTGCTAAGCTGCAACTGACATTGAGGCTCGAAAGTGTG  
GGTAT  
>ASV:4186:Family:Ruminococcaceae  
TACGGAGGATCCGAGCGTTATCCGGATTTATTGGGTTAAAGGGTGCCTAGGCGGGAAAGCAAGTCAGGTGTGAAATACC  
GGGGCTCAACCTCCGGGCTGCGCTTAAAACCTGCTTTTCTTGAGTGAAGTAGAGGCAAGCGGAATTCCTAGTGTAGCGGTG  
GAATGCGTAGATATCGGAGGAACACCAGTGGCGAAGGCGGCTTCTGGCACCACCTGACGCTGAGGCTCGAAAGTGTG  
GGTAG  
>ASV:4187:Genus:Anaerostipes  
TACGTAGGGGGCAAGCGTTATCCGGATTTACTGGGTGTAAGGGTGCCTAGGTGGTATGGCAAGTCAGAAGTAAAACCC  
AGGGCTTAACCTCGGACTGCTTTTAAAACCTGCTAGACTGGAGTGCAGGAGAGGTAAGCGGAATTCCTAGTGTAGCGGTG  
AAATGCGTAGATATCACGAAGAACCTCCGATTGCGAAGGCAGCTTACTAACCTGTAACCGACATTGATGCTCGAAAGTGTG  
GGTAT  
>ASV:4188:Order:Bacteroidales  
TACGGAGGATCAAGCGTTATCCGGATTTATTGGGTTAAAGGGTGCCTAGGCGGTTAAGTCAAGTCAAGTGTGAAAGTTT  
GTGGCTCAACCATAAAATTGCCGTTGAAACTGGGTTACTTGTAGTGTGTTGAGGTAGGCGGAATTCCTGGTGTAGCAGTG  
AAATGCGTAGATATAGGAGGAACACCAGTGGCGAAGGCGGCTTCTGGTCTGTAACGACGCTGAGGCTCGAAAGCGTG  
GGGAG  
>ASV:4189:Genus:Clostridium\_sensu\_stricto\_1  
TACGTAGGTGGCGAGCGTTATCCGGATTTACTGGGCGTAAAGGGAGCGTAGGCGGATGATTAAGTGGGGTGTGAAATACC  
CGGGCTCAACTTGGGTGCTGCATTCAAACCTGTTTCTAGAGTGCAGGAGAGGAGTGAATTCCTAGTGTAGCGGTG  
AAATGCGTAGAGATTAGGAAGAACACCAGTGGCGAAGGCGACTTCTGGACTGTAACGACGCTGAGGCTCGAAAGCGTG  
GGGAG  
>ASV:4190:Family:Ruminococcaceae  
TACGTAGGGAGCAAGCGTTGTCCGGAATTTACTGGGTGTAAGGGTGCCTAGGCGGCTTTGCAAGTCAAGTGTGAAATCTA  
TGGGCTCAACCATAAACTGCTTTCAAACCTGTTTTCTTGAGTGTGACAGAGGTAGGCGGAATTCCTGGTGTAGCGGTG  
GAATGCGTAGATATCGGAGGAACACCAGTGGCGAAGGCGGCTTCTGGGCTTCACTGACGCTGAGGAGCGAAAGCGTG  
GGGAG  
>ASV:4191:Genus:Butyricimonas  
TACGGAGGATCAAGCGTTATCCGGATTTATTGGGTTAAAGGGCGCTAGGCGGGACGGCAAGTCAAGTGTGAAAGTGTG  
GCAGCTAAACTGTAGCACCGGTTGAAACTGTTGACCTCGAGACGAGACGAGGGAGGCGGAACAAGTGAAGTGTAGCGGTG  
AATGCTTAGATATCACGAAGAACCTCCGATTGCGAAGGCAGCTGCTAAGCTGCAACTGACATTGAGGCTCGAAAGTGTG  
GTATC  
>ASV:4192:Family:Lachnospiraceae

AACGTAGGTCACAAGCGTTGTCCGGAATTACTGGGTGTAAAGGGAGCGCAGGCGGTGCGGCAAGTCTGATGTGAAAGCCC  
GGGGCTCAACCCCGTACTGCATTGAAAAGTGTCCGACTAGAGTGTCCGAGGGGTAAGTGAATTCTAGTGTAGCGGTG  
AATGCTTAGATATCACGAAGAACCCCGATTGCGAAGGCAGCTTGTAACTGTAACGACGTTTCATGCTCGAAAGTGTG  
GGTAT  
>ASV:4193:Order:Clostridiales  
TACGTAGGGGACAAGCGTTATCCGGAATTACTGGGCGTAAAGGGTGCAGGTCAGATAAGTTAGAGGTTAAAAGCA  
GAGGCTCAACCACTGTGAGCCTTTAAAAGTCTGACTTGAGTGCAGGAGAGGAAAGAGGAATTCCTAGTGTAGCGGTGA  
AATGCGTAGATATCCGGAGGAATACCCGGTGGCGAAGGCGCCTTTCTGGACTGTAACGACACTGAGGCACGAAAGCGTGG  
GGAG  
>ASV:4194:Order:Clostridiales  
TACGTAGGGAGCGAGCGTTGTCCGGAATTACTGGGCGTAAAGGGTGCAGGTCAGGTCCTGTAAGTTGGATGTGAAATACC  
CGGGCTCAACCTGGGGGTGCATGCAAAAGTGGGACTAGAGTACGGGAGAGGAAAGCGGAATTCCTAGTGTAGCGGTG  
AATGCGTAGATATTAGGAGGAACACCACTGGCGAAGGCGGCTTTCTGGACCAGAACTGACGCTGAGGCACGAAAGCGTG  
GGAG  
>ASV:4195:Genus:Erysipelatoclostridium  
TACGTAGGTGGCAAGCGTTATCCGGAATTATTGGGCGTAAAGAGGGAGCAGGCGGCAGCAAAGTCTGTGGTAAAAGACT  
GAAGCTTAACCTCAGTAAGCCATAGAAACAGGCAGCTAGAGTGCAGGAGAGGATCGTGAATTCATGTGTAGCGGTGA  
AATGCGTAGATATATGGAGGAACACCACTGGCGAAGGCGGACTCTGGCCTGTAACGACGCTCAGTCCGAAAGCGTGG  
GGAG  
>ASV:4196:Order:Mollicutes\_RF39  
TACGTATGGTGAAGCGTTATCCGGATTTACTGGGTGTAAAGGGAGCGCGGGCGGTGCGGCAAGTCTGATGTGAAAGCCC  
GGGGCTCAACCTCCGTAAGTCTTAAAAAGTGGTAGACTTGAGTACGGTAGAGGCAACCGGAATTCCTAGTGTAGCGGTGA  
AATGCGTAGATATTAGAAAGGAACACCACTGGCGAAGGCGGCTTTGCTGGGCCCTTACTGACGCTGAGGCACGAAAGCGTGG  
GGAG  
>ASV:4197:Order:Mollicutes\_RF39  
TACGTAGGGGGCAAGCGTTGTCCGGATTTATTGGGCGTAAAGCGTGTGTAGGCGGTTTATTAAGTCTAAGATCAAAGCCC  
GAAGCTTAACCTCCGTTCTGCTTAGAAAGTGGTAGACTTGAGTGTGGTAGAGGCAAGTGAATTCCTAGTGTAGCGGTGA  
AATGCGTAGATATTAGAAAGGAACACCACTGGCGAAGGCGGCTTTGCTGGGCCCTTACTGACGCTGAGGCACGAAAGCGTGG  
GGAG  
>ASV:4198:Kingdom:Bacteria  
TACGTATGGTGAAGCGTTATCCGGAATTACTGGGTGTAAAGGGAGCGCAGGCGGGGAGAACAAGTTGGAAGTGAATCCA  
TGGGCTCAACCCATGAAGTGTCTTCAAAGTGTCTTCTGAGTAGTGCAGGGGTAGATGGAATTCCTAGTGTAGCGGTG  
AATGCTTAGAGATATACAGAACACCACTGGCGAAGGCGGCTTACCAAAGTATATCTGACGTTGAGGCACGAAAGCGTGG  
GGAG  
>ASV:4199:Genus:Prevotella  
TACGGAGGATCCGAGCGTTATCCGGATTTATTGGGTTAAAGGGAGCGTAGGCCCCAGATAAGCGTGTGTGAAATGTA  
CCGGCTCAACCTGGGAATTGCATTTGAAAGTGGCGAAGTGTGGCTGAGTGCAGGTAAGCAGGCGGAATTCATGGTGTAGCGGTG  
AATGCTTAGATATCATGAAGAAGTCCGATTGCGAAGGCGGCTTCTGCAAGTGCAGTGCAGTGCAGGCTGAGGCACGAAAGCCAG  
GGGAG  
>ASV:4200:Species:arctica/frigidimarina/livingstonensis/vesiculosa  
TACGGAGGGTCCGAGCGTTAATCCGGAATTACTGGGCGTAAAGCGTGCAGGCGGTTTGTAAAGCCAGATGTGAAATCCC  
CGGGCTCAACCTGGGAATTGCATTTGAAAGTGGCGAAGTGTGGCTGAGTGCAGGAGGTAAGCAGGAAATTCCTAGTGTAGCGGTG  
AATGCGTAGATATCTGGAGGAATACCCGGTGGCGAAGGCGGCCCCCTGGACAAGACTGACGCTCATGCACGAAAGCGTGG  
GGAG  
>ASV:4201:Genus:CAG-56  
TACGGAGGATCCGAGCGTTATCCGGATTTACTGGGTGTAAAGGGAGCGTAGACGGCGAGGCAAGTCTGATGTGAAAACCC  
GGGGCTCAACCCCGGACTGCTTTTCAAAGTGGCGAAGTGTGGCTTGGAGTGCAGGAGGTAAGCAGGAAATTCCTAGTGTAGCGGTG  
AATGCGTAGATATCACGAAGAAGTCCGATTGCAAAGGCGGCTGCTGGACTGTAACGACGCTGATGCTCGAAAGTGTG  
GGTAT  
>ASV:4202:Family:Lachnospiraceae  
TACGGAGGATCCAAGCGTTATCCGGATTTATTGGGTTAAAGGGTGCAGGCGGTTTGTAAAGTTAGAGTGAATACC  
GGTGTCAACCCCGGACTGCTTTTCAAAGTGCAGGCTGGAGTGCAGGAGGGCAAGTGAATTCCTAGTGTAGCGGTG  
AATGCGTAGATATTAGGAGGAACACCACTGGCGAAGGCGGCTTCTGGACTGTAACGACACTGAGGCTCGAAAGCGTGG  
GGAG  
>ASV:4203:Family:Ruminococcaceae  
TACGTAGGTGGCAAGCGTTGTCCGGAATTACTGGGTGTAAAGGGCGCGCAGGCGGGCGGCAAGTTGGAAGTGAATCCC  
GGGGCTTAACCCCGGACTGCTTTTCAAAGTGGCTTGGAGTGCAGGAGGTTGACGGAATTCCTAGTGTAGCGGTG  
AATGCGTAGATATTAGGAGGAACACCACTGGCGAAGGCGGATTGCTGGACGACAAGTGCAGGCTGAGGCACGAAAGCGTGG  
GGAG  
>ASV:4204:Family:Lachnospiraceae  
TACGTATGGTGAAGCGTTATCCGGATTTACTGGGCGTAAAGGGAGCGTAGGCGGTCGATTAAGTTAGATGTGAAACCCC  
CGGGCTTAACCTGGGACTGCATCTAATACTGGTGGACTTAGAGTACAGGAGAGGAAAGCGGAATTCCTAGTGTAGCGGTG  
GAAATGCGTAGATATTAGGAGGAACATCAGTGGCGAAGGCGGCTTACTGGACTGAAAGTGCAGTGCAGGCTGAGGCACGAAAGCGTGG  
GGGA  
>ASV:4205:Genus:Gordonibacter  
TACGTAGGGGGCGAGCGTTATCCGGATTTACTGGGCGTAAAGCGCGCTAGGCGGCCCTCAAGCGGAACCTCTAACCCTG  
AGGGCTCAACCCCGGTCGGGTTCCGAAAGTGGCAGGCTCAGTGGTGGTAGAGGAAAGTGAATTCCTAGTGTAGCGGTGG  
AATGCGCAGATATCCGGAGGAACACCACTGGCGAAGGCGGCTTACTGGGCACCAAGTGCAGGCTGAGGCTCGAAAGCATGG

GTAGC  
>ASV:4206:Genus:Butyricimonas  
TACGTAGGGAGCGAGCGTTGTCCGGAATTACTGGGTGTAAGGGGCGCGTAGGCGGGACGGCAAGTCAGCGGTAAAAGACT  
GCAGCTAAACTGTAGCACGCCGTTGAAACTGTTGACCTCGAGACGAGACGAGGGAGGCGGAACAAGTGAAGTAGCGGTGA  
AATGCATAGATATCACGAAGAAGTCCGATCGCGAAGGCATTGTGCCGGGCATAACTGACGCTGAGGCTCGAAAGTCCG  
GTATC  
>ASV:4207:Genus:Lactococcus  
TACGTGGGTCCCGAGCGTTGTCCGGAATTATTGGGCGTAAAGCGAGCGCAGGTGGTTTTATTAAGTCTGGTGTAAAAGGCA  
GTGGCTCAACCATTGTATGCATTGGAAGTGGTAGACTTGAGTGCAGGAGAGAGAGTGAATTCCATGTGTAGCGGTGA  
AATGCGTAGATATATGGAGGAACACCGGTGGCGAAAGCGGCTCTCTGGCCTGTAAGTACACTGAGGCTCGAAAGCGTGG  
GGAGC  
>ASV:4208:Genus:Erysipelatoclostridium  
AACGTAGGTGGCAAGCGTTATCCGGAATTATTGGGCGTAAAGAGGGAGCAGGCGGCAGCAAGGGTCTGTGGTAAAAGCCT  
GAAGCTTAACCTCAGTAAGCCATAGAAACAGGCAGCTAGAGTGCAGGAGAGGTTAGTGAATTCCCAGTGTAGCGGTGA  
AATGCGTAGAGATTGGAGGAACACCGTGGCGAAGCGGCCACTGGGCACCAACTGACGCTGAGGCTCGAAAGTGTGG  
GTAGC  
>ASV:4209:Genus:Christensenellaceae\_R-7\_group  
TACAGAGGTCTCAAGCGTTGTTCGGAATCACTTGGCGTAAAGGGGCGCGTAGGCGGCTCGGTAAGTCTGGAGTAAAAGTCC  
TGCTTTTAAAGTGGGAATTGCTTTGGATACTGTCCGGCTTGGTGCAGGAGAGGTTAGTGAATTCCCAGTGTAGCGGTG  
AATGCGTAGAGATCGGGAGGAACACCGTGGCGAAGCGGGTCTCTGGACATTAAGTACGCTGAGGCACGAAGGCCAG  
GGGAG  
>ASV:4210:Family:Ruminococcaceae  
TACGTAGGGAGCGAGCGTTGTCCGGAATTACTGGGTGTAAGGGAGCGTAGGCGGGATGCCAAGTCAGCTGTGAAAACCTA  
TGGGCTTAACCTGTAGACTGCAGTTGAAACTGGTATTCTTGGAGTGAAGTAGAGGTTGGCGGAATTCCGAGTGTAGCGGTG  
AATGCGTAGATATCACGCAGAACCCGATTGCGAAGGCAGCCTGCTAGGGTGCAGACGAGCCTGAGGCACGAAGCGTGG  
GGTAT  
>ASV:4211:Genus:Sutterella  
AACGTAGGGTGGCAAGCGTTAATCGGAATTACTGGGCGTAAAGCGTGCAGGCGGTTCTGTAAGACAGATGTGAAATCCC  
CGGGCTCAACCTGGGAATTGCATTTGTACTGCAGGACTAGAGTTCATCAGAGGGGGTGAATTCCAAGTGTAGCAGTG  
AATGCGTAGATATTTGGAAGAACACCAATGGCGAAGGCAGCCCCCTGGGATGCGACTGACGCTCATGCACGAAGCGTGG  
GGGAG  
>ASV:4212:Kingdom:Bacteria  
AACGTAGGTCAACAAGCGTTGTCCGGAATTACTGGGTGTAAGGGAGCGCAGGCGGGAAGACAAGTTGGAAGTAAAACCA  
TGGGCTCAACCCATGAATTGCTTTCAAACCTGTTTTCTTGGAGTAGTGCAGGGGTAGGCGGAATGTATGGTGTAGCGGTG  
AATGCTTAGAGATCATACAGAACACCGATTGCGAAGGCAGCTTACCAAATATATCTGACGTTGAGGCACGAAGCGTGG  
GGGAG  
>ASV:4213:Genus:Allisonella  
TACGTAGGTGGCAAGCGTTGTCCGGAATTATTGAGCGTAAAGCGCGCGCAGGCGGCCGTGCAAGTCCATCTTAAAAGCGT  
GGGGCTTAACCCATGAGGGATGGAAGTGCAGGGCTGGAGTGTCCGAGGGGAAAGTGAATTCCATGTAGCGGTGA  
AATGCGTAGAGATTAGGAAGAACACCGGTGGCGAAGGCAGCTTCTAGACGCAACTGACGCTGAGGCGCGAAAGCGTGG  
GGAGC  
>ASV:4214:Genus:Collinsella  
TACGTAGGGGGCGAGCGTTATCCGATTACTGGGCGTAAAGCGCGAGTAGGCGGCCCGCAGGCGGGGGTGAAGCGG  
GGGGCTCAACCCCGAAGCCCGGAACCTCCGCGCTTGGTCCGGTAGGGGAGGTTGGAACACCCGGTGTAGCGGTG  
GAATGCGCAGATATCGGGTGAACACCGGTGGCGAAGGCAGCCCTCTGGGCCGAGACGACGCTGAGGCGCGAAAGCTGG  
GGGAG  
>ASV:4215:Genus:Corynebacterium\_1  
TACGTAGGGTGCAGCGTTGTCCGGAATTACTGGGCGTAAAGAGCTCGTAGGTGGTTTTGTCCGCTCGTCTGTGAAATCCC  
GGGGCTTAACCTCCGGCGTGCAGGCGATACGGGCATAACTTGAGTACTGTAGGGGAGACTGGAATTCCTGGTGTAGCGGT  
GAAACGCGCAGATATCAGGAGGAACACCGGTGGCGAAGGCAGGCTCTCTGGGCAGTAAGTACGCTGAGGAGCGAAAGCAT  
GGTA  
>ASV:4216:Genus:Holdemania  
TACGTAGGTGGCGAGCGTTATCCGGAATTATTGGGCGTAAAGGGTGCAGGCGGTTTTTTAAGTTAAGGTGAAAGCGT  
GGGGCTTAACCTATATAGCCTTAGAAACTGAGAGACTAGAGTACAGGAGAGGGCAATGGAATTCCATGTGTAGCGGTAA  
AATGCGTAGATATATGGAGGAACACCGTGGCGAAGGCAGGTTGCCTGGCCTGTAAGTACACTGACGCTCATGCACGAAGCGTGG  
GGAGC  
>ASV:4217:Family:Lachnospiraceae  
TACGTATGGTGAAGCGTTATCCGATTACTGGGTGTAAGGGGAGCGTAGACGGTAAAGCAAGTCTGAAGCGAAAGCCC  
GGGGCTCAACCCCGGACTGCTTTGGAAGTGTAACTAGAGTGTGGAGAGGTAAGCGGAATTCCTAGTGTAGCGGTG  
AATGCATAGATATCACGCAGAAGTCCGATTGCGAAGGCAGCTTACTAAGCCATAACTGACACTGAAGCACGAAGCGTGG  
GGAT  
>ASV:4218:Family:Rikenellaceae  
AACGTAGGTCAACAAGCGTTATCCGATTATTGGGTTTTAAGGGTGCAGGCTGTTTTTTAAGTTAGAGGTGAAAGCTC  
GACGCTCAACGTCGAAATTGCCTCTGATACTGAGAGACTAGAGTGTAGTTGCCGAAGGCAGGATGTGTGGTGTAGCGGTG  
AATGCTTAGATATCACGAAGAAGTCCGATTGCGAAGGCAGCCTGCTGGACTGTAAGTACGCTGATGCTCGAAAGTGTG  
GGTAT  
>ASV:4219:Genus:Acinetobacter  
TACAGAGGGTGCAGCGTTAATCGGATTACTGGGCGTAAAGCGTGCAGGCGCTTTTTAAGTCCGATGTGAAATCCC

CGAGCTTAACTTGGGAATTGCATTCGATACTGGGAAGCTAGAGTATGGGAGAGGATGGTAGAATTCCAGGTGTAGCGGTG  
AAATGCGTAGAGATCTGGAGGAATACCGATGGCGAAGGCAGCCATCTAGCCTAATACTGACGCTGAGGTACGAAAGCATG  
GGGAG  
>ASV:4220:Genus:Ruminococcaceae\_UCG-004  
TACGTAGGGAGCAAGCGTTATCCGGAATTACTGGGTGTAAGGGCGGTAGGCGGGGAAGCAAGTCAGATGTGAAACCCA  
GTGGCTCAACCCTGACTGCTGCAATTTGAAACTGTTTTCTTGAGTGTAGGAGAGGCAGCGGAATTCCTGTGTAGCGGTG  
AAATGCGTAGATATACGGAGGAACACCAGTGGCGAAGGCGGCTGCTGGACATTAAGTACGCTGAGGCGCAAAGCGTG  
GGGAG  
>ASV:4221:Order:Bacteroidales  
TACGGAAGGTCCAGGCGTTATCCGGATTTATTGGGTTAAAGGGAGCGTAGGCGGGGAGTCAAGTTGGAAGTAAATCTA  
TGGGCTCAACCATAAACTGCTTTCAAACCTGTTTTCTTGAGTAGTGCAGAGGTAGCGGAATTCCTGGTGTAGCGGTG  
GAATGCGTAGATATCACGCAGAACTCCAATTGCGAAGGCAGCTTACTAAACCATAACTGACACTGAAGCACGAAAGCGTG  
GGTAT  
>ASV:4222:Family:Ruminococcaceae  
TACGGAAGGTCCGGGCGTTATCCGGATTTACTGGGTGTAAGGGCGGTAGCCGGGAAGGCAAGTCAGATGTGAAATCCA  
CGGGCTTAACTCGTGAAGTGCATTTGAAACTGTTTTCTTGAGTATCGGAGAGGCAATCGGAATTCCTAGTGTAGCGGTG  
AAATGCGTAGATATCGAGAGGAACACTCGTGGCGAAGGCGGTTCTTGACATTAAGTACGCTGAGGCGCAAAGGCCAG  
GGGAG  
>ASV:4223:Genus:Ruminococcaceae\_UCG-003  
TACGTAGGTGGCAAGCGTTGTCCGGATTTACTGGGTGTAAGGGCGGTGACGCCGGGCATGCAAGTCAGATGTGAAATCTC  
AGGGCTTAACTCGAACTGCATTTGAAACTGTATGCTTGAGTGCCGGAGGGTAATCGGAGTTCTTGTTGTAGCGGTG  
AAATGCGTAGATATTAGGAGGAACACCAGTGGCGAAGGCGGCTTACTGGGCTTAACTGACGCTGAGACTCGAAAGCGTG  
GGGAG  
>ASV:4224:Genus:Ruminococcaceae\_NK4A214\_group  
TACGTAGGGAGCGAGCGTTGTCCGGATTTACTGGGTGTAAGGGCGGTAGGCGGGGAAGCAAGTCAGGTGTGAAATCTA  
TGGGCTCAACCATAAACTGCACTTGAACCTGTTTTCTTGAGTGTAGGAGAGGCAAGCGGAATTCCTAGTGTAGCGGTG  
AAATGCGTAGATATTAGGAGGAACACCAGTGGCGAAGGCGGCTTCTTGACATTAAGTACGCTGAGGCGCAAAGCGTG  
GGGAG  
>ASV:4225:Genus:Paraprevotella  
TACGGAAGATGCGAGCGTTATCCGGATTTATTGGGTTAAAGGGAGCGTAGGCGGGCTTTAAAGTCAGCGGTCAAATGTC  
GTGGCTCAACCATGTCAAGCGTTGAAACTGTAAGCCTTGAGTCTGCACAGGGCACACGGAATTCGTGGTGTAGCGGTGA  
AATGCTTAGATATCGGGAGGAACACCAGTGGCGAAGGCGGCTTACTGGGCACCAACTGACGCTGAGGCTCGAAAGCATG  
GTAGC  
>ASV:4226:Species:brevis/spicheri  
TACGTAGGTGGCAAGCGTTGTCCGGATTTATTGGGCGTAAAGCGAGCGCAGGCGGTTTTTAAAGTCTGATGTGAAAGCCT  
TCGGCTTAAACCGAAGAAGTGCATCGGAAACTGGGAGACTTGAGTGCAGAAGAGGACAGTGGAACTCCATGTGTAGCGGTG  
GAATGCGTAGATATATGGAAGAACACCAGTGGCGAAGGCGGCTGCTAGTCTGTAAGTACGCTGAGGCTCGAAAGCATG  
GGTAG  
>ASV:4227:Family:Ruminococcaceae  
TACGTAGGTGGCAAGCGTTATCCGGAATTACTGGGTGTAAGGGAGCGCAGGCGGGAGAGCAAGTTGGGAGTAAATCTA  
TGGGCTTAAACCATAGCCTGCGTTTGAACCTGAATGTCTTGAGTGAAGTAGAGGTAAGCGGAATTCCTGGTGTAGCGGTG  
AAATGCGTAGATATCGGGAGGAACACCAGTGGCGAAGGCGGCTTACTGGGCTTTACTGACGCTGAGGCGCAAAGCATG  
GGTAG  
>ASV:4228:Family:Ruminococcaceae  
TACGTAGGGAGCGAGCGTTGTCCGGAATTACTGGGTGTAAGGGTGCCTGGGCGGCAGTCAAGTCAGACGTGAAATCTA  
TGGGCTTAAACCATAGCCTGCGTTTGAACCTGAATGTCTTGAGTGAAGTAGAGGTAAGCGGAATTCCTGGTGTAGCGGTG  
AAATGCGTAGATATTAGGAAGAACACCAGTGGCGAAGGCGGCTTACTGGACGACAACCTGACGCTGAGGCGCAAAGCGTG  
GGGAG  
>ASV:4229:Genus:Christensenellaceae\_R-7\_group  
TACGTAGGGGGCGAGCGTTGTCCGGAATGATTGGGCGTAAAGGGCGCGTAGGCGGCCGTTAAGTCTGGAGTAAAGTCC  
CGCTTCAAGGTGGGAATTGCTTTGGATACTGATGGGCTTGAGTGCAGGAGAGGAAAGCGGAATTCCTGGTGTAGCGGTG  
AAATGCGTAGATATCGGTAGGAACACCAGTGGCGAAGGCGGCTTTCTGGGCACCAACTGACGCTGAGGCTCGAAAGTGTG  
GGTAG  
>ASV:4230:Family:Ruminococcaceae  
TACGTAGGTGGCGAGCGTTGTCCGGATTTACTGGGTGTAAGGGCGGTAGGCGGGACTGTAAGTCAGATGTGAAATGCG  
GAGGCTTAACTCCGAGCTGCATTTGAAACTGCAATCTTGAGTGTAGGAGGTAAGCGGAATTCCTGGTGTAGCGGTG  
AAATGCGTAGATATCGGGGGGAACACCAGTGGCGAAGGCGGCTTACTGGACAGTAAGTACGCTTGGGCTCGAAAGCGTG  
GGGAG  
>ASV:4231:Order:Bacteroidales  
TACGGAGGATGCGAGCGTTATCCGGATTTATTGGGTTAAAGGGAGTGTAGGTGGATTGTTAAGTCAGTTGTGAAAGTTT  
GCGGCTCAACCGTAAATTTGAGTTGAACTGGAGGTCTAGAGTGAGCGAGAAGTATCGGAATGCGTGGTGTAGCGGTG  
AAATGCGTAGATATCACGCAGAACTCCGATTGCGAAGGCAGCATACCGGTGCTCAACTGACGCTCATGCACGAAAGCGTG  
GGTAT  
>ASV:4232:Genus:UBA1819  
TACGTATGGTGCAGCGTTATCCGGAATTACTGGGTGTAAGGGAGCGCAGGCGGATTGGCAAGTTGGGAGTAAATCTA  
TGGGCTCAACCATAAAATTTGAGTTGAACTGCACTTGAGTGGTGTAGAGGTAGCGGAATTCCTGGTGTAGCGGTG  
GAATGCGTAGATATCACGAAGAACCTCCGATTGCGAAGGTAGCTTCTGACTGTAAGTACGCTGATGCTCGAAAGTGTG  
GGTAT



>ASV:4233:Genus:UC5-1-2E3  
AACGTAGGTCACAAGCGTTATCCGGATTTACTGGGTGTAAAGGGAGCGCAGACGGCACTGCAAGTCTGGAGTGAAAGCCC  
GGGGCTCAACCCCGGACTGCTTTGAAACTGTAGAGCTAGAGTGTGGAGAGGCAAGCGGAATTCCTAGTGTAGCGGTG  
AAATGCGTAGAGATTAGGAAGAACCAGGTGGCGAAGGCGACTTTCTGGACGAAAACGACGCTGAGGCGCAAAGCGTG  
GGGAG

>ASV:4234:Family:Lachnospiraceae  
TACGTAGGGGGCAAGCGTTATCCGGATTTACTGGGTGTAAAGGGAGCGTAGACGGTTAAGCAAGTCTGAAGTGAAAGCCC  
GGGGCTCAACCCCGGACTGCTTTGAAACTGTATAACTGGAGTGCAGGAGAGGTAAGTGAATTCCTGTGTAGCGGTG  
AAATGCGTAGATATAAGGAAGAACCAGATTGCGAAGGTAGCTTGTGGACTGTAACGACGCTGATGCTCGAAAGTGTG  
GGTAT

>ASV:4235:Genus:Ruminococcaceae\_UCG-014  
TACGTAGGGAGCAAGCGTTATCCGGATTTACTGGGTGTAAAGGGTGCCTAGACGGGAAGTCAAGTTAGTTGTGAAATCCC  
TCGGCTTAACCTGAGGAATGCAACTAAAACGATTTTCTGAGTACTGGAGAGGAAAGTGAATTCCTAGTGTAGCGGTG  
AAATGTGTAGATATTAGGAGGAACACCAGTGGCGAAGGCGGCTTCTGGACTGACACTGACGCTGAGGCTCGAAAGCGTG  
GGTAG

>ASV:4236:Genus:Christensenellaceae\_R-7\_group  
TACGTAGGGTGCAAGCGTTATCCGGATTTACTGGGCGTAAAGGGCGTGTAGGCGGCCGATTAAGTGTGGAGTGAAAGTCC  
ACTTTTCAAGGGTGAATTGCTTTGCAAGACTGTTGGCTTGTAGTGAAGTAGAGGTAGGCGGAATTCCTAGTGTAGCGGTG  
AAATGCGTAGAGATTGGGAGGAACACCAGTGGCGAAGGCGACTTACTGGGCCGTAACGACGCTGAGGCTCGAAAGCGTG  
GGGAG

>ASV:4237:Family:Ruminococcaceae  
TACGTATGGTGCAAGCGTTGTCGGATTTACTGGGTGTAAAGGGTGCCTAGGCGGATTGGCAAGTCAAGTGAATCCA  
TGGGCTTAACCCATGAATGCTTTGAAACTGTTAGTCTTGTAGTGAAGTAGAGGTAGGCGGAATTCCTAGTGTAGCGGTG  
AAATGCGTAGATATTAGGAGGAACACCAGTGGCGAAGGCGGCTGCTGGGCTTTACTGACGCTGAGGCTCGAAAGTGTG  
GGGAG

>ASV:4238:Genus:CHKCI002  
TACGTAGGGGGCGAGCGTTATCCGGAATCATTGGGCGTAAAGAGCGCTAGGCGGCCCTCAAGCGGGATCTCTAATCCG  
AGGGCTCAACCCCGGCGGATCCGAACTGGGGGGCTCGGGTGCAGTGTAGAGGAGGATGGAATTCCTAGTGTAGCGGTG  
AATGCGCAGATATCGGAAGAACCAGTGGCGAAGGCGACTCTCTGGGCCGCCACCGACGCTGAGGCGCAAAGCGGG  
GGAGC

>ASV:4239:Order:Clostridiales  
TACGGAGGATCCGAGCGTTATCCGGATTTACTGGGTTTAAAGGGAGCGTAGGCGGGATGGCAAGTCAAGTGTGAAACCTG  
AGGGCTCAACCTTCAAGACTGCAATTTGAAACTGCTGTTCTTGTAGTGAAGTAGAGGTAAGCGGAATTCCTAGTGTAGCGGTG  
AAATGCGTAGATATTAGGAGGAACACCAGTGGCGAAGGCGGCTTACTGGACGTTAAGTACGCTGAGGCTCGAAAGCGTG  
GGGAG

>ASV:4240:Genus:Sutterella  
TACGTAGGTGGCAAGCGTTGTCGGATTTACTGGGTGTAAAGGGCGTGCAGCCGGTCTGCAAGTCAAGTGTGAAATCCA  
TGGGCTCAACCTGGGAATTGCATATATGACTGCAGGACTTGTAGTTTGTAGAGGAGGGTGGGATTCCACGTGTAGCAGTG  
AAATGCGTAGATATGTGAAGAACCAGTGGCGAAGGCGACTCTCTGGACATGACTGACGCTCATGCACGAAAGCGTG  
GGGAG

>ASV:4241:Genus:Acinetobacter  
TACAGAGGGTGCAGCGTTAATCCGATTTACTGGGCGTAAAGCGTGCCTAGGCGGCTTTTTAAGTCCGATGTGAAATCCC  
CGAGCTTAACCTGGGAATTGCATTCGATACTGAGAAGCTAGAGTATGGGAGAGGATGGTAGAATTCAGGTGTAGCGGTG  
AAATGCGTAGAGATCTGGAGGAATACCAGTGGCGAAGGCGACTCTGGCCTAATACTGACGCTGAGGTACGAAAGCATG  
GGGAG

>ASV:4242:Genus:Christensenellaceae\_R-7\_group  
TACGTAGGGGGCGAGCGTTGTCGGAAATGACTGGGCGTAAAGGGCGTGTAGGCGGCTAGATAAGTCTGGAGTGAAAGTCC  
TGCTTTCAAGGTGGGAATTGCTTTGAAACTGAATAGCTTGTAGTGCAGGAGAGGTAAGTGAATTCCTAGTGTAGCGGTG  
AAATGCGTAGAGATTGGGAGGAACACCAGTGGCGAAGGCGACTTACTGGGCCGTAACGACGCTGAGGCGCAAAGCGTG  
GGGAG

>ASV:4243:Family:Lachnospiraceae  
TACGTAGGGGGCAAGCGTTATCCGGATTTATTGGGTTTAAAGGGAGCGTAGACGGTTTTGCAAGTCTGAAGTGAAAGCCC  
GGGGCTTAACCCCGGACTGCTTTGAAACTGTAGAAGTGTAGAGTGCAGGAGAGGTAAGTGAATTCCTAGTGTAGCGGTG  
AAATGCTTAGAGATCATAACAGAACACCAGATTGCGAAGGCGACTTACCAAATATATCTGACGTTGAGGCACGAAAGCGTG  
GGGAG

>ASV:4244:Genus:Alistipes  
TACGGAGGATTCAAGCGTTATCCGGATTTATTGGGTTTAAAGGGTGCCTAGGCGGTTTTGATAAGTTAGAGGTGAAATTT  
GGGGCTCAACCTGAACGTGCTCTAATACTGTTGGGCTAGAGAGTGTGCGGTAGGCGGAATGTATGGTGTAGCGGTG  
AAATGCGTAGATATTAGGAGGAACACCAGTGGCGAAGGCGACTCACTGGACTGCAACTGACACTGATGCTCGAAAGTGTG  
GGTAT

>ASV:4245:Class:Bacteroidia  
TACGGAGGATCCGAGCGTTATCCGGATTTATTGGGTTTAAAGGGAGCGTAGGTGGATTGTTAAGTCAAGTGTGAAAGTTT  
GCGGCTCAACCGTAAATTTGCAAGTGAAGTGTAGAGCTTGTAGTATCGGAGAGGAAAGCGGAATTCCTAGTGTAGCGGTG  
AAATGCGTAGATATTAGGAGGAACACCAGCGGCGAAGGCGGCTTCTGGACGACAACGACGCTGAGGCGCAAAGCGTG  
GGGAG

>ASV:4246:Genus:GCA-900066225  
AACGTAGGTCACAAGCGTTGTCGGAAATTTACTGGGTGTAAAGGGAGCGTAGGCGGGAGTGAAGTTGAATGTGAAAACGA  
TGGGCTCAACCCATCGTTGCGTTCAAACCTGCATTTCTTGTAGTGAAGTAGAGGTAAGCGGAATTCCTAGTGTAGCGGTG

AATGCGTAAATATTAGGAGGAACACCAGTGGCGAAGGCGGCTTACTGGGCTTTAACTGACGCTGAGGCTCGAAAGCGTGG  
GTAGC  
>ASV:4247:Genus:Barnesiella  
TACGGAGGATGCGAGCGTTATCCGGATTTATTGGGTTTAAAGGGTGCCTAGGCGGCACGCCAAGTCAGCGGTGAAATTTCC  
CGGGCTCAACCCGGAGTGTGCCGTTGAAACTGGCGAGCTAGAGTACACAAGAGGCAGCGGAATGCGTGGTGTAGCGGTG  
AAATGCGTAGATATCGGGAGGAACACCAGTGGCGAAGGCGGCTTACTGGGCACCAACTGACGTTGAGGCTCGAAAGCGTG  
GGGAG  
>ASV:4248:Family:Lachnospiraceae  
TACGTATGGTCAAGCGTTATCCGGATTTACTGGGTGTAAGGGAGCGCAGGCGGTGCGGCAAGTCTGATGTGAAAGCCC  
GGGGCTCAACCCGGTACTGCATTGAAACTGCTGGGCTTGGTGCAGGAGAGGTAAGCGGAATTCCTAGTGTAGCGGTG  
AAATGCGTAGATATCAGGAAGAACTCCGATCGCAAGGCATTGTGCCGGGCATAACTGACGCTGAGGCTCGAAAGTGGC  
GGTAT  
>ASV:4249:Genus:Alistipes  
TACGGAGGATCCGAGCGTTATCCGGATTTATTGGGTTTAAAGGGAGCGTAGGCGGTTTGATAAGTTAGAGGTGAAATGTT  
AGGGCTCAACCTGAAACTGCCTCTAATACTGTTGGACTAGAGAGTAGTTGCGGTAGCGGAATGTATGGTGTAGCGGTG  
AAATGCGTAGAGATCGGGAGGAACACCAGTGGCGAAGGCGGCTTACTGGGCTTTAACTGACGCTGAGGCACGAAAGTGTG  
GGTAG  
>ASV:4250:Genus:Christensenellaceae\_R-7\_group  
AACGTAGGGGGCGAGCGTTGTCCGGAATGATTGGGCGTAAAGGGCGCGTAGGCGGCTGCTAAGTCTGAAGTAAAAGTCC  
TGCTTTCAAGGTGGGAAGTGTCTGGATACTGGTGGGCTGGAGTGCAGGAGAGGAAAGCGGAATACCGGTGTAGCGGTG  
AAATGCTTAGATATCAGGAAGAACTCCGATTGCGAAGGCAGCCTGCCAGACCCTGACGTTTCATGCTCGAAAGTGGC  
GGTAT  
>ASV:4251:Family:Lachnospiraceae  
TACGTAGGTGGCGAGCGTTGTCCGGAATTTATTGGGCGTAAAGAGCATGTAGGCGGCTTAAATAAGTCGAGCGTAAAATCC  
GGGGCTCAACCCCGGAATGCTTTTGAAGCTGTAAGGCTAGAGTACAGGAGAGGTAAGTGAATTCCTAGTGTAGCGGTG  
AAATGCGTAGATATTAGGAGGAACACCAGTGGCGAAGGCGACTTACTGGACTGCTACTGACACTGAGGCACGAAAGCGTG  
GGGAG  
>ASV:4252:Genus:Bacteroides  
TACGGAGGATCCGAGCGTTATCCGGATTTATTGGGTTTAAAGGGAGCGTAGATGGATGTTTAAAGTCAGTTGTGAAAGTTT  
GCGGCTCAACCGTAAAATTGCAAGTGTACTGGATGCTTGGAGTTCAGTTGAGGCAGGCGGAATTCGTGGTGTAGCGGTG  
AAATGCTTAGATATCAGGAAGAACTCCGATTGCGAAGGCAGCCTGCTAATCTGCGACTGACATTGAGGCTCGAAAGTGTG  
GGTAT  
>ASV:4253:Family:Ruminococcaceae  
AACGTAGGTCACAAGCGTTGTCCGGAATTTACTGGGTGTAAGGGAGCGTAGGCGGGAATGCAAGTTGAATGTCAAAACTA  
CCGGCTTAACTGGTAGCCGCTTCAAAGCTGCTTTCTTGGTGAAGTAGAGGCAGGCGGAATTCCTAGTGTAGCGGTGA  
AATGCGTAGATATTAGGAGGAACACCAGTGGCGAAGGCGGCTTACTGGGCACCAACTGACGCTGAGGCTCGAAAGTGTGG  
GTAGC  
>ASV:4254:Family:Lachnospiraceae  
AACGTAGGGGGCAAGCGTTATCCGGATTTACTGGGTGTAAGGGAGCGTAGACGGCGAAGCAAGTCTGAAGTAAAACCC  
AGGGCTCAACCTGGGACTGCTTTGAAACTGTTTTGCTAGAGTGTGCGGAGAGGTAAGTGAATTCCTAGTGTAGCGGTG  
AAATGCGTAGATATAACGAAGAACTCCAATTGCGCAGGCAGCTTACTAACTACAACGACGCTGAAGCACGAAAGCGTG  
GGTAT  
>ASV:4255:Genus:UBA1819  
AACGTAGGGTCAAGCGTTGTCCGGAATTTACTGGGTGTAAGGGAGCGGGGCGGATTGACAAGTTGGGAGTAAAATCTA  
TGGGCTCAACCCATAAATTGCTTTCAAAGCTGTCAGTCTTGGTGTAGAGGTAGGCGGAATTCCTGGTGTAGCGGTG  
GAATGCTTAGATATCAGGAAGAACTCCGATTGCGAAGGCAGCTACTGGACTGCAACTGACACTGATGCTCGAAAGTGTG  
GGTAT  
>ASV:4256:Genus:Ralstonia  
TACGTAGGGTCCAAGCGTTAATCCGGAATTTACTGGGCGTAAAGCGTGCAGGCGGCTGTGCAAGACCGATGTGAAATCCC  
CGGGCTTAACTGGGAATTGCATTGGTACTGCACGGCTAGAGTGTGTGAGAGGGGGTAGAATTCACGTTGAGCAGTGT  
AAATGCGTAGAGATGTGGAGGAATACCGATGGCGAAGGCAGCCCCCTGGGATAACACTGACGCTCATGCACGAAAGCGTG  
GGGAG  
>ASV:4257:Genus:Collinsella  
TACGTAGGGGGCGAGCGTTATCCGGATTTACTGGGCGTAAAGCGCGCTAGGCGGCCCGGCAGGCCGGGGTTGAAGCGG  
GGGGCTCAACCCCCGAGCCCCGGAACCTCCGCGGCTTGGTCCGGTAGGGGAGGGTGAACACCCGGTGTAGCGGTG  
GAATGCGCAGATATCGGGTGAACACCGGTGGCGAAGGCGGCTTCTGGGCCGAGACGACGCTGAGGCGCGAAAGCTGG  
GGGAG  
>ASV:4258:Family:Lachnospiraceae  
TACGTAGGGGGCAAGCGTTATCCGGATTTACTGGGTGTAAGGGAGCGTAGACGGATGGACAAGTCTGATGTGAAAGGCT  
GGGGCTCAACCCGGGACTGCATTGAAACTGCCGCTTGGTGTGAGGAGGAAAGTGAATTCCTAGTGTAGCGGTG  
AAATGCGTAGATATTAGGAGGAACACCAGTGGCGAAGGCAGCCTGCTAAGCTGCAACTGACATTGAGGCTCGAAAGTGTG  
GGTAT  
>ASV:4259:Family:Lachnospiraceae  
TACGGAGGATCCGAGCGTTATCCGGATTTATTGGGTTTAAAGGGAGCGTAGACGGCAAGGCAAGTCTGATGTGAAAACCC  
AGGGCTTAACTGGGACTGCATTGAAACTGTCATACTTGGTGTGCGGAGGGGTAAGCGGAATTCCTAGTGTAGCGGTG  
AAATGCGTAGAGATTAGGAAGAACTCCAGTGGCGAAGGCGGCTTCTGACTGTAACGACGCTGAGGCTCGAAAGCGTG  
GGGAG  
>ASV:4260:Genus:Sellimonas

TACGTATGGTGAAGCGTTATCCGGATTTACTGGGTGTAAAGGGAGCGTAGACGGATAGGCAAGTCTGGAGTGAAAACCC  
AGGGCTCAACTCTGGGACTGCTTTGAAAACCTGCAGATCTGGAGTGCCGGAGAGGTAAGCGGAATTCCTAGTGTAGCGGTG  
AAATGCGTAGATATCACGAAGAACTCCGATTGCGAAGGCAGCCTGCTAAGCTGCAACTGACATTGAGGCTCGAAAGTGTG  
GGTAT  
>ASV:4261:Family:Cyclobacteriaceae  
TACGGAGGGTGCAGCGTTATCCGGATTTATTGGGTTTAAAGGGTGCCTAGGCGGCTGCTTAAGTCAGTGGTAAAAGGCA  
CGGGCTCAACCCGATGTAAGCCATTGATACTGGGCAGCTTGAGTTCTCTGAGAGTACATGGAATTTGATGGTGTAGCGGTG  
AAATGCGTAGATACCATCAGGAACACCGATAGCGAAGGCAGTGTACTTTGGAGCGACTGACGCTGATGCACGAAAGCGTG  
GGTAG  
>ASV:4262:Class:Bacteroidia  
TACGTAGGGTGCAGCGTTATCCGGATTTATTGGGTTTAAAGGGAGCGTAGGCGGATGCTTAAGTCAGTTGTGAAAATTT  
GCGGCTCAACCGTAAAATTGCAGTTGATACTGGGTGCTTGGAGTACAGTAGAGGCAGGCGGAATTCCTAGTGTAGCGGTG  
AGATGCGTAGATATTAGGAGGAACACCACTGGCGAAAAGCGGCTTTCTGGACGACAACGACGCTGAGGCGGAAAGCCAG  
GGGAG  
>ASV:4263:Family:Ruminococcaceae  
TACGTATGGAGCAAGCGTTATCCGGAACTTACTGGGTGTAAAGGGAGCGTAGGCGGGACAGCAAGTTGAATGTGAAATCTA  
TGGGCTCAACCCATAAACTGCGTTCAAACCTGTTGTTCTTGGAGTGAAGTAGAGGTAGGCGGAATTCCTAGTGTAGCGGTG  
AAATGCGTAGATATTAGGAGGAACACCACTGGCGAAAAGCGGCTTACTGGGCTTAACTGACGCTGAGGCTCGAAAGCGTG  
GGTAG  
>ASV:4264:Genus:Alistipes  
TACGGAGGATTCAAGCGTTATCCGGATTTATTGGGTTTAAAGGGTGCCTAGGCGGTTTGATAAGTTAGAGGTGAAATCCC  
GGGGCTTAACTCCGGAGCTGCCTCTAATACTGTTAGACTAGAGAGTAGTTGCGGTAGGCGGAATGTATGGTGTAGCGGTG  
AAATGCTTAGATATCACGAAGAACTCCGATTGCGAAGGCAGCCTGCTAAGCTGCAACTGACATTGAGGCTCGAAAGTGTG  
GGTAT  
>ASV:4265:Order:Bacteroidales  
TACGGAGGATCCGAGCGTTATCCGGATTTACTGGGTGTAAAGGGTGCCTAGGCGGCTCTGCAAGTCAGAAGTAAAATCCA  
TGGGCTTAAACCATGAAGTGTCTTTGAAAACCTGAGAGCTTGGAGTGAAGTAGAGGTAGGCGGAATTCCTGGTGTAGCGGTG  
AAATGCTTAGATATCACGAAGAACTCCGATTGCGAAGGCAGCTTACTGGATTGTAACGACGCTGATGCTCGAAAGTGTG  
GGTAT  
>ASV:4266:Genus:Butyricicoccus  
TACGTATGGCGCAAGCGTTATCCGGATTTACTGGGTGTAAAGGGCGCGCAGGCGGGCCGGCAAGTTGGAAGTAAAATCTA  
TGGGCTTAAACCATAACTGCTTTCAAACCTGCTGGTCTTGGAGTGTGGAGAGGCAGGCGGAATTCCTGTGTAGCGGTG  
AAATGCGTAGATATACGGAGGAACACCACTGGCGAAAAGCGGCTGCTGGACATTAACGACGCTGAGGCGGAAAGCGGTG  
GGGAG  
>ASV:4267:Genus:Bacteroides  
TACGGAGGATCCGAGCGTTATCCGGATTTATTGGGTTTAAAGGGAGCGTAGGTGGACTGGTAAGTCAGTTGTGAAAATTT  
GCGGCTCAACCCGGAACCTGCTTTGAAAACCTGCTGACTAGAGTGTGCGAGGTAAGGCGGAATTCCTGGTGTAGCGGTG  
AAATGCGCAGATATCGGGTGAACACCGGTGGCGAAGGCAGCCCTCTGGGCCGAGACCAGCCTGAGGCTCGAAAGCGTG  
GGGAG  
>ASV:4268:Family:Lachnospiraceae  
TACGGAGGGGCAAGCGTTATCCGGATTTACTGGGTGTAAAGGGAGCGTAGACGGCACAGCAAGTCTGAAGTAAAATCCC  
CGGGCTCAACCCGGAACCTGCTTTGAAAACCTGCTGACTAGAGTGTGCGAGGGTAAGTGAATTCCTAGTGTAGCGGTG  
AAATGCGTAGATATGTGGAAGAACACCGATGGCGAAGGCAGCCCTCTGGGACATGACTGACGCTCATGCACGAAAGCGTG  
GGGAG  
>ASV:4269:Order:Clostridiales  
TACGTATGGTGAAGCGTTATCCGGATTTACTGGGTGTAAAGGGTGCCTAGGTGGACCGCAAGTTGGAAGTAAAATCTA  
TGGGCTCAACCCGATGACTGCATTTGAAAACCTGCTGGCCTTGGAGTGTGAGAGGTAGGTAAGCGGAATTCCTGGTGTAGCGGTG  
GAATGCTTAGATATCACGAAGAACTCCGATTGCGAAGGCAGCTTACTGGACTGTAACGACGCTGATGCTCGAAAGTGTG  
GGTAT  
>ASV:4270:Order:Clostridiales  
TACGTAGGGGCAAGCGTTATCCGGATTTACTGGGTGTAAAGGGAGCGTAGGCGGGACGGCAAGTCAGATGTGAAAATCTA  
TGGGCTCAACCCGATGACTGCATTTGAAAACCTGCTGGCCTTGGAGTGTGAGAGGTAGGTAAGCGGAATTCCTGGTGTAGCGGTG  
AAATGCGTAGAGATCACGCAGAACTCCGATTGCGAAGGCAGCTTACTAAACCATAACTGACACTGAAGCACGAAAGCGTG  
GGGAT  
>ASV:4271:Family:Clostridiaceae\_2  
TACGTAGGGGCAAGCGTTATCCGGATTTATTGGGTTTAAAGGGTGCCTAGGTGGTTTCTTAAGTCAGGGGTGAAAAGTT  
ACGGCTCAACCGTAGTAAGCCTTTGAAAACCTGCGAACTTGGAGTGTGAGAGAGAGAGTGAATTCCTAGTGTAGCGGTG  
AATGCGTAGAGATTAGGAAGAACACCGGTGGCGAAGGCAGCTTTCTGGACGAAAACCTGACGCTGAGACGCGAAAGCGTG  
GGAGC  
>ASV:4272:Genus:Anaerotruncus  
TACGTAGGGAGCAAGCGTTATCCGGAACTTACTGGGTGTAAAGGGAGCGTAGGCGGGATGGCAAGTAGAATGTTAAATCCA  
TGGGCTCAACCGGTGGCTGCTTCTAAACTGCCGTTCTTGGAGTGAAGTAGAGGCAGGCGGAATTCCTAGTGTAGCGGTG  
AATGCGTAGATATTAGGAGGAACACCACTGGCGAAGGCAGCTTACTGGACGATAACTGACGCTGAGGCTCGAAAGCGTG  
GGAGC  
>ASV:4273:Family:Lachnospiraceae  
TACGGAAGGTCGGGGCTTATCCGGATTTATTGGGTTTAAAGGGAGCGTAGGCGGTTTGTAAAGCGTGTGTGAAAATGTG  
GGGGCTCAACCTGTGGACTGCATTGAAAACCTGCTACTTGGAGTGCAGGAGGGTAAGCGGAATTCCTAGTGTAGCGGTG  
AAATGCGTAGATATTAGGAGGAACACCACTGGCGAAGGCAGCTTACTGGACGTTAACTGACGCTGAAGCTCGAAAGCGTG

GGTAT

>ASV:4274:Order:Bacteroidales

TACGGAAGGTCCGGGCGTTATCCGGATTTATTGGGTTTAAAGGGAGCGTAGGCTGGAGATTAAGCGTGTGTGAAATGTA  
GTGGCTCAACCTCTGCACTGCAGCGGAACTGGTTTCTTGAGTACGCACAAGAGGCAGGCGGAATGCGTGGTGTAGCGG  
TGAAATGCATAGATATCACGCAGAACCCCGATTGCGAAGGCAGCCTGCTAGGGTGCACAGACGCTGAGGCACGAAAGCG  
TGGGT

>ASV:4275:Genus:Libanicoccus

TACGTATGGGCGAGCGTTATCCGGATTCATTGGGCGTAAAGCGCGTAGGCGGCCCTCGTAGCCGGGAGTCAAATCCG  
GGGGCTCAACCCCGCCGCTCCCGAACCACGGGGCTTGAAGTCTGGCAGGGGAGGGTGAATTCAGTGTAGCGGTGG  
AATGCGCAGATATTGGGAAGAACCCGGTGGCGAAGGCGGCCCTCTGGGCCACACTGACGCTGAGGCGGAAAGCTGGG  
GGAGC

>ASV:4276:Genus:Sneathia

TACGTATGTTGCGAGCGTTATCCGGATTTATTGGGCTTGAAGGGCATCTAGGCGGTAAGACAAGTTGAAGGTGAAAACCT  
GTGGCTCAACCATAGGCTTGCCTACAAAACCTGTTGAACTAGAGTACTGGAAAGGTGGGTGAACTACACGAGTAGAGGTG  
AAATTCGTAGATATGTGTAGGAATGCCGATGATGAAGATAACTCACTGGACAGAAACTGACGCTGAAGTGCAGAAAGCTAG  
GGAG

>ASV:4277:Family:Lachnospiraceae

TACGTATGGTCAAGCGTTATCCGGATTTACTGGGTGTAAGGGAGCGCAGGCGGTGCGGCAAGTCTGATGTGAAAGGCA  
TGGGCTCAACCTGTGGACTGCATTGAAACTGTCATACTTGAAGTGCAGGAGGGGTAAGCGGAATTCAGTGTAGCGGTG  
AAATGCGTAGATATTAGGAGGAACACCAGTGGCGAAGGCGGCCCTACTGGGCACCAACTGACGCTGAGGCTCGAAAGTGTG  
GGTAG

>ASV:4278:Family:Lachnospiraceae

TACGTAGGTGGCAAGCGTTATCCGGATTTACTGGGTGTAAGGGAGCGTAGACGTTTTGCAAGTCTGAAGTGAAGAACCC  
GGGGCTTAAACCCGGGACTGCTTTGGAGACTGTAGAAGTGCAGGAGAGGTAAGTGAATTCCTAGTGTAGCGGTG  
AAATGCGTAGATATTAGGAGGAACACCAGTGGCGAAGGCGGCCCTACTGGGCACCAACTGCGGCTGAGGCTCGAAAGCATG  
GGTAG

>ASV:4279:Genus:Ruminococcaceae\_NK4A214\_group

TACGTAGGGAGCAAGCGTTGTCCGGATTTACTGGGTGTAAGGGAGCGTAGGCGGGGAAAGCAAGTCAAGTGTGAAATCTA  
TGGGCTCAACCCATAAACTGCACTTGAAGTGTCTTTCTTGAGTGTGGAGAGGCAAGCGGAATTCCTAGTGTAGCGGTG  
AAATGCGTAGATATTAGGAGGAACACCAGTGGCGAAGGCGGCCCTGCTGGACATTAAGTACGCTGAGGCGGAAAGCGTG  
GGGAG

>ASV:4280:Family:Family\_XIII

TACGGAAGGTCCGGGCGTTATCCGGATTTATTGGGCTTAAAGAGTGCCTAGGTGGCTTTTTAAGCGCAGGGTTAAGGCA  
ATGGCCCAACCATTTGTCGCCCTGCGAACTGGAAGGCTTGAAGTGCAGGAGAGGAAAGCGGAATTCCTAGTGTAGCGGTG  
AATGCGTAGATATTAGGAGGAACACCAGTGGCGAAGGCGGCCCTTCTGACTGTAAGTACGCTGAGGCTCGAAAGTGTGG  
GTAGC

>ASV:4281:Class:Bacteroidia

TACGTAGGGAGCAAGCGTTATCCGGATTTATTGGGTGTAAGGGTGCCTAGACGGGAATTTAAGTTAGTTGTGAAAGCCC  
TCGGCTTAACTGGGAACTGCAACTAAAACCTGGATTTCTTGAGTGTGGAGAGGAAAGCGGAATTCCTAGTGTAGCGGTG  
AAATGCTTAGATATACGAAGAACTCCGATTGCGAAGGCAGCTCACTGGAGCGCAACTGACGCTGAAGCTCGAAAGTGGC  
GGTAT

>ASV:4282:Genus:Prevotella\_7

TACGGAAGGTCCGGGCGTTATCCGGATTTATTGGGTTTAAAGGGAGCGCAGGCGCCGGGCAAGCGTGTGTGAAATGCA  
GTCGCTCAACGTCTGCACTGCAGCGGAACTGCCAGCTTGAAGTGCAGCGCAACGTTGGCGGAATTCGCCGTGTAGCGGTG  
AAATGCTTAGAGATCATAAGAAACCCGATTGCGAAGGCAGCTTACCAAATATATCTGACGTTGAGGCACGAAAGTGTG  
GGGAG

>ASV:4283:Order:Clostridiales

TACGTAGGGGCGAGCGTTGTGAGGAATTTACTGGGCGTAAAGGGTGCCTAGGCGGCCCTGCAGGTCAGATGTGAAATACC  
CGTGCTTAACTGCGGGCTGCATTTGAAACCTGAGGCTTGAAGTGTGGAAGAGGTAAGTGAATTCGCGGTGTAGCGGTG  
AAATGCGTAGATATCGGGAGGAACACCAGTGGCGAAGGCGACTTACTGGGCCAACACTGACGCTGAGGCACGAAAGCGTG  
GGGAG

>ASV:4284:Genus:Lachnospiraceae\_ND3007\_group

TACGTATGGTCAAGCGTTATCCGGATTTACTGGGTGTAAGGGAGCGTAGGTTGGCAAGGCAAGCCAGAAGTGAAGAACCC  
GGGGCTCAACCGCGGATTGCTTTTGAAGTGTGATGCTAGAGTGCAGGAGGGGTGAGCGGAATTCCTAGTGTAGCGGTG  
GAATGCGTAGATATCGGGAGGAACACCAGTGGCGAAGGCGGCCCTACTGGGCACCAACTGACGCTGAGGCTCGAAAGTGTG  
GGTAG

>ASV:4285:Family:Ruminococcaceae

TACGTAGGTGGCAAGCGTTGTCCGGATTTACTGGGTGTAAGGGGCGCGTAGGCGGGATGGCAAGTCAAGTGTGAAATCTA  
TGGGCTCAACCCATAAACTGCTTTCAAACCTGTTTTCTTGAGTGTGAGGAGGTAAGTGAATTCGCGGTGTAGCGGTG  
GAATGCGTAGATATCGGGAGGAACACCAGTGGCGAAGGCGACTTACTGGACTGTAAGTACGCTGATGCTCGAAAGTGTG  
GGTAT

>ASV:4286:Genus:Mycoplasma

TACATAGGTGCAAGCATTATTCGGATTTATTGGGCGTAAAGCAAGCGCAGGCGGATGTGTAAGTCTGTGTTAAAAGTA  
GCTACTTAATAGTTGTTGACCGAATACTATATGTCTAGAATGTGGTAGGAAGTTTTGGAATTAACATGGAGCGGTGG  
AATGTGTAGATATGTTTAAAGAACCCGGAGGCGAAGGCGAAAACCTTAGGCCATAATTGACGCTTAGGCTTGAAGTGTGG  
GGAGC

>ASV:4287:Family:Eggerthellaceae

TACGTAGGGGCGAGCGTTATCCGGATTCATTGGGCGTAAAGCGCGTAGGCGGCCCTAAGCGGGACCTCTAACCTT

GGGGCTCAACCTCAAGCCGGTCCCGACTGGGCGGCTCGAGTTCGGTAGAGGCAGGCGGAATTCCCGGTGTAGCAGTGG  
AATGCACAGATATCGGGAAGAACACCGATGGCGAAGGCAGCCTGCTGGGCCGCAACTGACGCTGAGGCGCGAAAGCTGGG  
GGAGC

>ASV:4288:Species:nucleatum

TACGTATGTCACGAGCGTTATCCGGATTTATTGGGCGTAAAGCGCGTCTAGGTGGTTATGTAAGTCTGATGTGAAAATGC  
AGGGCTCAACTCTGTATTGCGTTGAAACTGTGTAAC TAGAGTACTGGAGAGGTAAGCGGAACTACAAGTGTAGAGGTGA  
AATTCGTAGATATTTGTAGGAATGCCGATGGGGAAGCCAGCTTACTGGACAGATACTGACGCTGAAAGCGCGAAAGCTGG  
GTAGC

>ASV:4289:Species:subterminale

TACGTAGGTGGCAAGCGTTGTCCGGATTTACTGGGCGTAAAGGATGCGTAGGCGGATGTTTAAAGTGTGAAATACC  
CGGGCTCAACTTGGGTGCTGCATTTCAAACCTGGACATCTAGAGTGC GGAGAGGAAAGCGGAATTCCTAGTGTAGCGGTG  
AAATGCGTAGAGATTAGGAAGAACCAGTGGCGAAGGCGGCTTTCTGGACCGTAACGACGCTGAGGCATGAAAGCGTG  
GGGAG

>ASV:4290:Genus:Lachnospiraceae\_UCG-010

TACGTATGGTCAAGCGTTATCCGGATTTACTGGGTGTAAGGGTGAGTAGGCGGCATGGCAAGTAAGATGTGAAAGCTC  
GAGGCTTAACCTCGGGATTGCATTTTAAACTGCTAAGCTAGAGTACAGGAGAGGAAAGCGGAATTCCTAGTGTAGCGGTG  
AAATGCGTAGATATTAGGAAGAACCAGTGGCGAAGGCGGCTTTCTGGACTGAAACTGACGCTGAGGCACGAAAGCGT  
GGGGA

>ASV:4291:Genus:GCA-900066575

TACGTAGGGGCAAGCGTTATCCGGATTTACTGGGTGTAAGGGAGCGTAGGCGGTTTGACAAGTCAGAAGTAAAGCCC  
GGGGCTCAACTCCGGGACTGCTTTTAAACTGCCGGACTAGATTGCAGGAGAGGTAAGTGGAAATTCCTAGTGTAGCGGTG  
AAATGCGTAGATATTAGGAGGAACCAGTGGCGAAGGCGGCTTACTGGACTGTAATGACGCTGAGGCTCGAAAGCGTG  
GGGAG

>ASV:4292:Kingdom:Bacteria

TACGGAGGATCCGAGCGTTATCCGGATTTATTGGGTTAAAGGGAGCGTAGACGGCGCAGCAAGTCTGATGTGAAAGGCA  
GGGGCTTAACCCCTGGACTGCATTGAAACTGCTGTGCTT GAGTGCCGGAGGGGTAAGCGGAATTCCTAGTGTAGCGGTG  
AAATGCGTAGAGATCTGGAGGAATACCGTGGCGAAGGCGGCCCTTGACGAAAGACTGACGCTCAGGTGCGAAAGCGTG  
GGGAG

>ASV:4293:Order:Clostridiales

TACGGAGGATGCGAGCGTTATCCGGATTTATTGGGTTAAAGGGAGCGTAGACGGGTTTTAAAGTCAAGTGTGAAAGTTT  
GGGGCTCAACCTTAAACTGCATTTGAAACTGTGTTCTT GAGTGAAGTAGAGGTAAGCGGAATTCCTAGTGTAGCGGTG  
AAATGCGTAGATATTAGGAGGAACATCAGTGGCGAAGGCGGCTTACTGGGCTTAACTGACATTGAGGCTCGAAAGTGTG  
GGTAT

>ASV:4294:Genus:Bacteroides

TACGGAGGATCCAAGCGTTATCCGGATTTATTGGGTTAAAGGGAGCGTAGGCGGCTTTCGCAAGTCAGATGTGAAATCTA  
TGGGCTCAACCATAAACTGCATTTGAAACTGTAGAGCTT GAGTGCAGTTGAGGCAGGCGGAATTCGTGGTGTAGCGGTG  
AAATGCTTAGATATCACGAAGAACCAGTGGCGAAGGCGAGCCACTGGACTGCAACTGACACTGATGCTCGAAAGTGTG  
GGTAT

>ASV:4295:Genus:Oscillospira

TACGTAGGTGGCAAGCGTTGTCCGGATTTACTGGGTGTAAGGGCGGTAGCCGGGTCGGCAGGTGAGATGTGAAATCTG  
GAGGCTCAACCTCCAACCTGCATTTGAAACTGTTGATCTT GAGTATCGGAGAGGTAATCGGAATTCCTAGTGTAGCGGTG  
AAATGCGTAGATATTAGGAGGAACCAGTGGCGAAGGCGGCTTACTGGACTGTAACGACGCTGATGCTCGAAAGTGTG  
GGTAT

>ASV:4296:Family:Ruminococcaceae

AACGTAGGTCAACGCGTTGTCCGGATTTACTGGGTGTAAGGGAGCGCAGGTGGGAAGACAAGTTGGAAGTAAATCTA  
TGGGCTTAACCATAAACTGCATTTGAAACTGTGTTCTT GAGTGAAGTAGAGGTAAGCGGAATTCCTAGTGTAGCGGTG  
AAATGCGTAGATATTAGGAGGAACCAGTGGCGAAGGCGGCTTTCTGGACGACAACGACGCTGAGGCTCGAAAGCGTG  
GGGAG

>ASV:4297:Genus:Prevotellaceae\_Ga6A1\_group

TACGGAAGATGCGAGCGTTATCCGGATTTATTGGGTTAAAGGGAGCGTAGGCGGCGGTTAAGTCAAGCGGTAAAATAGT  
GTGGCTCAACCATACTCCCGGTTGACTGGCCGCTT GAGTGTATTCAAGGCAGATGGAATTCGTGGTGTAGCGGTGA  
AATGCTTAGATATCACGAAGAACCAGTGGCGAAGGCGAGCTGCTGGGTTACAACCTGACGCTGAGGCTCGAAAGTGGC  
GTATC

>ASV:4298:Genus:Ruminococcaceae\_UCG-010

TACGTAGGTGGCAGCGTTATCCGGATTTACTGGGCGTAAAGGGTGTG TAGGCGGGACTGCAAGTCAAGTGTGAAAATTA  
CGGGCTTAACCTGTAACCTGCATTTGAAACTGCGGTTCTT GAGTGCCGGAGGGGTAATGGAATTCCTAGTGTAGCGGTG  
AAATGCGTAGATATTGGGAGGAACCAGTGGCGAAGGCGATTTACTGGACGGCAACTGACGCTGAGACACGAAAGTGTG  
GGGAG

>ASV:4299:Genus:Ruminococcaceae\_NK4A214\_group

TACGTAGGGAGCAAGCGTTATCCGGATTTACTGGGTGTAAGGGCGCGTAGGCGGGATGCAAGTCAAGTGTGAAATCTA  
TGGGCTTAACCATAAACTGCATTTGAAACTGTATCTCTT GAGTGCTGGAGAGGTAGATGGAATTCCTTGTGTAGCGGTG  
AAATGCGTAGATATAAGGAAGAACCAGTGGCGAAGGCGAGCTGCTAGGGTGAAACAGACGCTGAGGCACGAAAGCGTG  
GGTAT

>ASV:4300:Genus:Roseburia

TACGTATGGTGAAGCGTTATCCGGATTTACTGGGTGTAAGGGAGCGCAGGCGGAAGGCTAAGTCTGATGTGAAAGCCC  
GGGGCTCAACCCCGTACTGCATTTGAAACTGGTCATCTAGAGTGTGCGAGGGGTAAGTGGAAATTCCTAGTGTAGCGGTG  
GAATGCGTAGATATCGGGAGGAACCAGTGGCGAAGGCGGCTTACTGGCACCAACTGACGCTGAGGCTCGAAAGTGTG  
GGTAG

>ASV:4301:Family:Lachnospiraceae  
TACGGAGGATCCGAGCGTTATCCGGATTTATTGGGTTAAAGGGAGCGTAGATGGATGTTTAAAGTCAGTTGTGAAAAGTTT  
GCGGCTCAACCCCGGACTGCATTGAAACTGTCGACTAGAGTGTGCGAGGGTAAGTGAATTCCCTAGTGTAGCGGTG  
AAATGCGTAGATATTAGGAGGAACACCAGTGGCGAAGGCGGCTTACTGGATTGTAACGACGCTGATGCTCGAAAAGTGTG  
GGTAT

>ASV:4302:Genus:Anaerofilum  
TACGGAGGATCCGAGCGTTATCCGGATTTATTGGGTTAAAGGGAGCGTAGGCGGACGCTTAAAGTCAGCGGTGAAAAGTTT  
GCGGCTCAACCCATAAACTGCTTTTCAAACCTGTTTCTTGGTAGTGCAGAGGTAGCGGGAATCCCGGTGTAGCGGTG  
GAATGCGTAGATATCCGGAGGAACACCAGTGGCGAAGGCGGCTTACTGGGCACCAACTGACGCTGAGGCTCGAAAAGTGTG  
GGTAG

>ASV:4303:Family:Lachnospiraceae  
TACGTATGGTCAAGCGTTATCCGGATTTACTGGGTGTAAGGGAGCGCAGGCGGTGCGGCAAGTCTGATGTGAAAAGCCC  
GGGGCTCAGCCCGGACTGCATTTGAAACTGCATAGCTAGAGTACAGGAGAGGAGGCGGGAATCCCTAGTGTAGCGGTG  
AAATGCGTAGATATTAGGAGGAACACCAGTGGCGAAGGCGGCTTACTGGGCTTAACTGACGCTGAGGCACGAGAGCGTG  
GGTAG

>ASV:4304:Family:Lachnospiraceae  
TACGTATGGAGCAAGCGTTATCCGGATTTACTGGGTGTAAGGGAGTGTAGGTGGTATCACAAGTCAGAAGTAAAAGGCT  
GGGGCTCAACCCCGGACTGCATTTGAAACTGTCAACTAGAGTACAGGAGAGGAAAGCGGGAATCCCTAGTGTAGCGGTG  
AAATGCGTAGATATTAGGAGGAACACCAGTGGCGAAGGCGGCTTACTGGACTGTAACGACGCTGATGCTCGAAAAGTGTG  
GGTAT

>ASV:4305:Genus:Ruminococcaceae\_UCG-013  
TACGGAGGATCAAGCGTTATCCGGATTTATTGGGTTAAAGGGTGCCTAGGCGGGATAGCAAGTCAGTCGTGAAATGCC  
GAGGCTTAACTCGGAGCTGCATTTGAAACTGTTTCTTGGTAGTATCGGAGAGGAAAGCGGGAATCCCTAGTGTAGCGGTG  
AAATGCGTAGATATTAGGAGGAACACCAGTGGCGAAGGCGGCTTACTGGACTGAACTGACGCTGAGGCACGAAAGCGTG  
GGGAG

>ASV:4306:Genus:Christensenellaceae\_R-7\_group  
TACGTAGGGAGCGAGCGTTGTCGGAACTACTGGGTGTAAGGGCGCGCAGGCGGGCCGGTAAGTCTGGAGTAAAAGTCC  
TGCTTTTAAAGGTGGGAATTGCTTTGAACTGTCGGGCTTGGTAGTGCAGGAGAGGTAAGCGGGAATCCCTAGTGTAGCGGTG  
AAATGCGTAGATATTAGGAGGAACACCAGTGGCGAAGGCGGCTTACTGGGCACCAACTGACGCTGAGGCTCGAAAAGTGTG  
GGTAG

>ASV:4307:Family:Ruminococcaceae  
TACGTAGGGAGCAAGCGTTATCCGGATTTACTGGGTGTAAGGGCGCGCAGGCGGGCCGGTAAGTCTGGAAGTAAAATCTA  
TGGGCTCAACCCATAAACTGCTTTCAAACCTGTTTTCTTGGTAGTGCAGAGGTAGGCGGGAATCCGAGTGTAGCGGTG  
AAATGCGTAGATATTCCGGAGGAACACCAGTGGCGAAGGCGGCTTACTGGACGATAACTGACGCTGAGGCTCGAAAAGCGTG  
GGGAG

>ASV:4308:Kingdom:Bacteria  
TACGTAGGTCAACAGCGTTGTCGGAACTACTGGGTGTAAGGGAGCGCAGGCGGTTTGTAAAGTCAGATGTGAAATCCC  
CGGGCTCAACCTGGGAACTGCATCTGATACTGGCAAGCTTGGTAGTCTCGTAGAGGGGGGTAGAATCCAGGTGTAGCGGTG  
AAATGCGTAGAGATTAGGAAGAACACCAGTGGCGAAGGCGATTCTCTGGACTGTAACGACGCTGAGGCTCGAAAAGCGTG  
GGGAG

>ASV:4309:Genus:Acidaminococcus  
TACGTAGGTGGCGAGCGTTGTCGGAACTTATTGGGCGTAAAGAGCATGTAGGCGGGCTTTTAAAGTCTGACGTGAAAATGC  
GGGGCTTAAACCCGATGCGGTTGGATACTGGAAGTCTTGGTAGTGCAGGAGAGGAAAGGGGAATCCAGTGTAGCGGTGA  
AATGCTTAGAGATCACAAGAACACCAGTGGCGAAGGCGGCTTACCAAACTATATCTGACGTTGAGGCACGAAAGCGTG  
GGAGC

>ASV:4310:Genus:Anaerofilum  
AACGTAGGTGGCAAGCGTTGTCGGAACTACTGGGTGTAAGGGAGCGCAGGCGGAACTGCAAGTTGGATGTCAAATCTA  
CGGGCTCAACCCGATACGCATTCAAACCTGCGGTTCTTGGTAGTGCAGAGGTAGGCGGGAATCCCGGTGTAGCGGTGG  
AATGCGTAGATATCCGGAGGAACACCAGCGGCGAAGGCGGCTTACTGGGCACCAACTGACGCTGAGGCTCGAAAAGCATGG  
GTAGC

>ASV:4311:Genus:UBA1819  
TACGTAGGTGGCAAGCGTTGTCGGATTTATTGGGTTAAAGGGTGCCTAGGCGGATTGGCAAGTTGGGAGTAAAATCTA  
TGGGCTCAACCCATAAATTGCTTTCAAACCTGTCAGTCTTGGTAGTGTAGAGGTAGGCGGGAATCCGTGGTGTAGCGGTG  
AAATGCTTAGATATCACGAAGAACTCCGATTGCGAAGGCGGCTTACTGGATTGTAACGACACTGATGCTCGAAAAGTGTG  
GGTAT

>ASV:4312:Genus:Anaerostipes  
TACGTAGGGGGCAAGCGTTATCCGGAACTACTGGGTGTAAGGGTGCCTAGGTTGGTATGGCAAGTCGGAAGTAAAACCC  
AGGGCTTAACTCTGGGACTGCTTTTGAACCTGTCAGACTGGAGTGCAGGAGAGGTAAGCGGGAATCCCTAGTGTAGCGGTG  
AAATGCGTAGATATTAGGAGGAACATCAGTGGCGAAGGCGGATTGCTGGACGATAACTGACGCTGAGGCAGGAAAGTGTG  
GGGAG

>ASV:4313:Genus:Lachnospiraceae\_UCG-003  
TACGGAGGATCCGAGCGTTATCCGGATTTACTGGGTGTAAGGGAGCGTAGATGGCATGGCAAGTCTGAAGTAAAAGCCC  
GGGGCTTAAACCCGGGACTGCTTTGAAACTGTTAAGCTAGAGTGCAGGAGAGGTAAGCGGGAATCCCTAGTGTAGCGGTG  
AAATGCGTAGATATCACGAAGAACTCCGATTGCGAAGGCGGCTTACTGGACTGCAACTGACATTGAGGCTCGAAAAGTGTG  
GGTAT

>ASV:4314:Family:Lachnospiraceae  
TACGGAGGGTGCAGCGTTAATCGGAATAACTGGGCGTAAAGGGCACGAGGCGGTGACTTAAAGTGGAGTGTGAAAAGCCC  
GGGGCTCAACCCGGGACTGCTTTGAAACTATGCAGCTAGAGTGTGCGAGAGGTAAGTGAATCCAGTGTAGCGGTG

AAATGCGTAGATATTAGGAGGAACACCAGTGGCGAAGGCGGCTTACTGGACGGTAACTGACGTTGAGGCTCGAAAGCGTG  
GGGAG  
>ASV:4315:Family:Prevotellaceae  
TACGGAAGGTCAGGCGTTATCCGGATTTACTGGGTGTAAGGGAGCGTAGGCCGCCCTTAAGCGTGTGTGAAATGCC  
GCGGCTCAACCGTGGCACTGCAGCGCAACTGGGGGCTTGGAGTGCACGCAACGCAGCGGAATTCGTGGTGTAGCGGTG  
GAATGCGTAGATATTGGGAGGAACACCAGTGGCGAAGGCGCCTTTCTGGACTGTGTCTGACGCTGAGATGCGAAAGCCAG  
GGTAG  
>ASV:4316:Family:Lachnospiraceae  
TACGTAGGGGGCAAGCGTTATCCGGATTTACTGGGTGTAAGGGAGCGTAGACGGCATGGCAAGTCTGAAGTAAAACCC  
GGGGCTCAACCTGGGACTGCTTTGAAAAGTGTCAAGCTAGAATGCAGGAGAGGTAAGTGAATTCCTAGTGTAGCGGTG  
AAATGCGTAGATATTAGGAGGAACACCAGTGGCGAAGGCGGCTTTCTGGACGACAACGACGCTGAGGCGCGAAAGCCAG  
GGGAG  
>ASV:4317:Genus:Romboutsia  
TACGTAGGGGGCTAGCGTTATCCGGAATTTACTGGGCGTAAAGGGTGCCTAGGCGGCTTTCAAGTCAAGGAGTAAAAGGCT  
ACGGCTCAACCGTAGTAAGCTCTTGAAGTGTAAAGTGTAGTGCAGGAGAGGAGAGTAGAATTCCTAGTGTAGTGGTGA  
AATGCGTAGATATTAGGAGGAATACCAGTTGCGAAGGCGGCTCTCTGGACTGTAAGTACGCTGAGGACGAAAGCGTGG  
GGAGC  
>ASV:4318:Genus:Turicella  
TACGTAGGGTGCAGCGTTGTCCGGATTTACTGGGCGTAAAGAGCTCGTAGGTGGCTTGTCCGCTCGTCTGTGAAAGTCT  
GGGGCTTAACCCGGGTGTGCAGGCGATACGGGCTGGCTTGGAGTGTAGGGGAGACTGGAATTCCTGGTGTAGCGGTG  
GAATGCGCAGATATCAGGAGGAACACCAGTGGCGAAGGCGAGTCTCTGGGCAGCCACTGACGCTGAGGAGCGAGAGCATG  
GGTAG  
>ASV:4319:Genus:Anaerococcus  
TACGTATGGACCAAGCGTTGTCCGGAATCATTGGGCGTAAAGGGTACGTAGGCGGTTAAATAAGTTAGAAGTAAAATCCC  
ATAGCTCAACTATAGTAAGCTTCTAAAAGTGTATAACTTGGAAATGAAAGGAAAAGTGAATTCCTAGTGTAGCGGTGA  
AATGCGCAGATATTAGGAGGAATACCAGTGGCGAAGGCGACTTTCTGGTCATATTCTGACGCTGAGGTACGAAAGCGTGG  
GTAGC  
>ASV:4320:Genus:Oscillibacter  
TACGGAGGATCCGAGCGTTATCCGGATTTATTGGGTTAAAGGGCGTGCAGCCGGGCCGCAAGTCAAGTGTGAAATCTG  
GAGGCTTAACCTCAAAGTGCATTTGAAAGTGTAGGTCTTGGAGTACCAGGAGAGGTTATCGGAATTCCTTGTGTAGTGGT  
AAATGCGTAGATATAAGGAAGAACACCAGTGGCGAAGGCGGATAACTGGACGGCAACTGACGCTGAGGCGCGAAAGCGTG  
GGGAG  
>ASV:4321:Genus:GCA-900066225  
TACGTAGGTAGCGAGCGTTATCCGGAATTTACTGGGTGTAAGGGAGCGTAGGCCGGGATTGCAAGTTGAATGTGAAACCTA  
TGGGCTTAACCCATAGTTGCGTTCAAAGTGCAGTCTTGGAGTAAAGTAAAGGAGGAGGTAAGTGAATTCCTAGTGTAGCGGTGA  
AATGCGTAAATATTAGGAGGAACACCAGTGGCGAAGGCGGCTTCTGGGCTTTAACTGACGCTGAGGCTCGAAAGCGTGG  
GTAGC  
>ASV:4322:Family:Lachnospiraceae  
TCCTTCTTTTCCCTCTTTCTCTTCTTTCTGGGTGTAAGGGAGCGTAGACGGAGTGGCAAGTCTGATGTGAAAACCC  
GGGGCTCAACCCCGGACTGCATTGGAAGTGTCAATCTGGAGTACCAGGAGAGGTAAGCGGAATTCCTAGTGTAGCGGTG  
AAATGCGTAGATATTAGGAGGAACACCAGTGGCGAAGGCGGCTTACTGGACGGTAACTGACGCTTGGGCTCGAAAGCGTG  
GGGAG  
>ASV:4323:Genus:Coproccoccus\_2  
TACGTATGGTCAAGCGTTATCCGGATTTACTGGGTGTAAGGGTGCCTAGGTGGCAAGGCAAGTTTGAAGTAAAATCC  
GGGGCTCAACCTCGGAAGTGTCTTGGAAAGTGTCTTGGAGTACAGGAGAGATAAGTGAATTCCTAGTGTAGCGGTG  
AAATGCGTAGATATTAGGAGGAACACCAGTGGCGAAGGCGACTTACTGGACTGCTACTGACACTGAGGACGAAAGCGTG  
GGGAG  
>ASV:4324:Family:Family\_XIII  
TACGTAGGGGGCAAGCGTTATCCGGAATTTACTGGGCGTAAAGAGTGCCTAGGTGGCACCTTAAGCGCAGGGTTAAGGCA  
ATGGCTCAACCATTTGTCGCCCTGCGAACTGGGGCGCTTGGAGTGCAGGAGAGGAAAGCGGAATTCCTAGTGTAGCGGTGA  
AATGCGTAGATATTAGGAGGAACACCAGTGGCGAAGGCGGCTTTCTGGACTGTAAGTACACTGAGGACGAAAGCGTGG  
GGAGC  
>ASV:4325:Family:Ruminococcaceae  
TACGTAGGTGGCAAGCGTTGTCCGGAATTTACTGGGTGTAAGGGTGCAGGCGGGATTGCAAGTTGGATGTGAAATACC  
GGGGCTTAACCCCGGAGCTGCATCAAAGTGTAGTCTTGGAGTGGAGTAGAGGTAAGCGGAATTCAGTGTAGCGGTG  
AAATGCGTAGATATTGAGGAGGAACACCAGTGGCGAAGGCGGCTTACTGGCACCAACTGACGCTGAGGCTCGAAAGCATG  
GGTAG  
>ASV:4326:Family:Ruminococcaceae  
TACGTAGGTGGCAAGCGTTATCCGGAATTTACTGGGTGTAAGGGAGCGTAGGCCGGGAAGGCAAGTCAAGTGTGAAATCCA  
CAGGCTTAACCTGTGGCGTGCATTTGAAAGTGTCTTCTTGGAGTGAAGTAAAGGAGGAGGCGGAATTCCTAGTGTAGCGGTG  
AAATGCGTAGATATTAGGAGGAACACCAGTGGCGAAGGCGGCTTACTGGACGATAACTGACGCTGAGGCTCGAAAGCGTG  
GGGAG  
>ASV:4327:Family:Ruminococcaceae  
TACGGAGGATCCGAGCGTTATCCGGATTTACTGGGTGTAAGGGCGCGCAGGCGGGCCGCAAGTTGGAAGTAAAATCCG  
GGGGCTTAACCCCGAAGTGTCTTCAAAGTGTCTTGGAGTGGAGAGGAGGCGGAATTCCTAGTGTAGCGGTG  
AAATGCTTAGATATCACGAAGAACTCCGATTTGCGAAGGCGAGTCTGCTGGACTGTAAGTACGCTGAGGACGAAAGCGTG  
GGTAG  
>ASV:4328:Genus:Cuneatibacter

TACGGAGGATCCGAGCGTTATCCGGATTTATTGGGTTAAAGGGTGCCTAGGCGGTTTGATAAGTCAGAAGTGAAAACCC  
AGGGCTTAACTCTGGGACTGCTTTTAAAAGTGCAGACTGGAGTGCAGGAGAGGTAAGCGGAATTCCTAGTGTAGCGGTG  
AAATGCGTAGATATTAGGAGGAACACCAGTGGCGAAGGCGGCTACTGGGCACCAACTGACGCTGAGGCTCGAAAGCGTG  
GGGAG  
>ASV:4329:Family:Ruminococcaceae  
TACGTAGGGAGCGAGCGTTGTCCGGAATTACTGGGTGTAAGGGAGCGTAGGCGGAAAGCAAGTTGGAAGTGAAATGCA  
TGGGCTTAAACCATGAGCTGCTTTCAAAGTGTCTTTCTTGGAGTGAAGTGAAGGCGAGGCGGAATTCCTAGTGTAGCGGTG  
AAATGCGTAGATATTAGGAGGAACATCAGTGGCGAAGGCGGCTACTGGACTGAAACTGACACTGAGGCACGAAAGCGTG  
GGGAG  
>ASV:4330:Order:Bacteroidales  
TACGGAGGATTTCGAGCGTTATCCGGATTTATTGGGTTAAAGGGAGCGTAGGCGGACGCTTAAGTCAGTTGTGAAAATTT  
GCGGCTCAACCGTAAAATTGCAAGTTGATACTGGCGACTTGGAGTGAACAGAGGTAGGCGGAATTCGTGGTGTAGCGGTG  
AAATGCGTAGATATTAGGAGGAACACCAGTGGCGAAGGCGGCTACTGGGCACCAACTGACGCTGAGGCTCGAAAGTGTG  
GGTAG  
>ASV:4331:Genus:Turicibacter  
CACGTAGGTGGCAAGCGTTATCCGGAATTATTGGGCGTAAAGAGCGCGCAGGTGGTTGATTAAGTCTGATGTGAAAGCCC  
ACGGCTTAAACCGTGGAGGGTATTGAAAAGTGGTGCAGTCTGGAGTGCAGAAAGAGGGAAGTGAATTCATGTGTAGCGGTG  
AAATGCGTAGATATTAGGAGGAACACCAGTGGCGAAGGCGGCTTCTGGTCTGTAACGACTGAGGCGCGAAAGCGTG  
GGGAG  
>ASV:4332:Genus:Family\_XIII\_AD3011\_group  
TACGTAGGGGGCAAGCGTTATCCGGAATTATTGGGCGTAAAGAGTACGTAGGTGGTTTTCTAAGCACGGGGTTAAGGCA  
ATGGCTTAAACCATGTTTCGCTTTGTAAGTGGAAAGTGGTGGAGTGCAGGAGAGGAAAGCGGAATTCCTAGTGTAGCGGTG  
AAATGCGTAGATATTAGGAGGAACACCAGTGGCGAAGGCGGCTTACTGGACGGTAACTGACGTTGAGGCTCGAAAGCGTG  
GGAGC  
>ASV:4333:Family:Ruminococcaceae  
TACGTAGGTGGCAAGCGTTATCCGGAATTACTGGGTGTAAGGGCGCGTAGGCGGGAATGCAAGTCAGATGTGAAATCCA  
GGGGCTTAAACCTTGAAGTGCATTTGAAACTGATTTCTTGGAGTGCAGGAGAGGTTGACGGAATTCCTAGTGTAGCGGTG  
AAATGCGTAGATATTACGGAAGAACTCCGATTGCGAAGGCAGCTTACTGGATTGTAACGACTGACGCTGATGCTCGAAAGTGTG  
GGTAT  
>ASV:4334:Genus:Ruminiclostridium\_5  
TACGTAGGGAGCGAGCGTTGTCCGGATTTACTGGGTGTAAGGGTGCCTAGGCGGCGAGGCAAGTCAGGCGTGAAATCTA  
TGGGCTTAAACCATAACTGCCTTTGAAACTGCTTTGCTTGGAGTGAAGTGAAGGTAGGCGGAATTCCTAGTGTAGCGGTG  
AAATGCGTAGATATTAGGAGGAACACCAGTGGCGAAGGCGGCTTACTGGACGGTAACTGACGCTGAGGCTCGAAAGTGTG  
GGTAG  
>ASV:4335:Genus:Subdoligranulum  
AACGTAGGTGGCAAGCGTTGTCCGGAATTACTGGGTGTAAGGGAGCGCAGGCGGACTGGCAAGTTGGAAGTGAAATCTA  
TGGGCTCAACCCATGAATGCTTTTCAAAGTGAAGGCTAGAGTACAGGAGAGGTAAGTGAATTCCTAGTGTAGCGGTG  
GAATGCGTAGATATTAGGAGGAACACCAGTGGCGAAGGCGGCTTACTGGGCACCAACTGACGCTGAGGCTCGAAAGTGTG  
GGTAG  
>ASV:4336:Family:Lachnospiraceae  
AACGTAGGTGCAAGCGTTGTCCGGAATTACTGGGTGTAAGGGAGCGCAGGCGGAGAACCAAGTTGGAAGTGAAATCCA  
TGGGCTCAACCCATGAATGCTTTTCAAAGTGAAGGCTAGAGTACAGGAGAGGTAAGTGAATTCCTAGTGTAGCGGTG  
AAATGCGTAGATATTAGGAGGAACACCAGTGGCGAAGGCGACTTACTGGACTGCTACTGACACTGAGGCACGAAAGCGTG  
GGGAG  
>ASV:4337:Genus:Bacteroides  
TCCTTCTCTCTCTCTCTCTCTCTCTTTCTGGGTTAAAGGGAGCGTAGGTTGATTGTTAAGTCAGTTGTGAAAATTT  
GCGGCTCAACCCATGAATGCTTTTCAAAGTGAAGGCTAGAGTACAGGAGAGGTAAGTGAATTCCTAGTGTAGCGGTG  
AAATGCTTAGATATTACGGAAGAACTCCGATTGCGAAGGCAGCTACTAGACTGCTACTGACACTGATGCTCGAAAGTGTG  
GGTAT  
>ASV:4338:Genus:Corynebacterium\_1  
TACGTAGGGTGCAGCGTTGTCCGGAATTACTGGGCGTAAAGAGCTCGTAGGTGGTCTGTCCGCTCATTGTGAAAGCCC  
GGTGCTTAACTCCGGGTTGGCAGGTGATACGGGCATGACTGGAGTACTGTAGGGGAGACTGGAATTCCTGGTGTAGCGGT  
GAAATGCGCAGATATTAGGAGGAACACCAGTGGCGAAGGCGGCTCTCTGGCAGTAACTGACGCTGAGGAGCGAAAGCAT  
GGTA  
>ASV:4339:Order:Clostridiales  
TACGTAGGGAGCGAGCGTTGTCCGGAATTACTGGGCGTAAAGGGCGCGTAGGCGGTAGATCAAGTCGATGTGAAATACC  
CGGGCTCAACCTGGGGGTTGCATGCGAAACTGGAATCTTGGAGTGCAGGTAAGGAAAGTGAATTCCTAGTGTAGCGGTG  
AAATGCGTAGATATTAGGAGGAACACCAGTGGCGAAGGCGACTTCTGGGCCGTAACGACGCTGAGGCGGAGAGCGTG  
GGGAG  
>ASV:4340:Family:Lachnospiraceae  
TACGTAGGGAGCGAGCGTTGTCCGGAATTACTGGGTGTAAGGGTGCCTAGGTGGCATGGTAAGTCAGAAGTGAAAGCCC  
GGGGCTTAAACCCGGGACTGCTTTTAAAAGTGTGATGCTGGAGTGCAGGAGAGGTAAGCGGAATTCCTAGTGTAGCGGTG  
AAATGCTTAGAGATCATAAGAACACCAGTGGCGAAGGCGACTTACCAAATATATCTGACGTTGAGGCACGAAAGCGTG  
GGGAG  
>ASV:4341:Family:Ruminococcaceae  
TACGTAGGGAGCGAGCGTTGTCCGGAATTACTGGGTGTAAGGGTGCCTAGGCGGTAATCAAGTCAGGCGTGAAACTA  
TGGGCTTAACTCATAGACTGCGCTTAAAAGTGAATATCTTGGAGTGAAGTGAAGGTAAGCGGAATTCCTAGTGTAGCGGTG  
AAATGCGTAGAGATCGGAGGAACACCAGTGGCGAAGGCGGCTTACTGGGCTTTACTGACGCTGAGGCACGAAAGCATG



GGTAG

>ASV:4342:Genus:Marvinbryantia

TACGTAGGGGGCAAGCGTTATCCGGATTTACTGGGTGTAAGGGGAGCGTAGACGGGATGGCAAGTCAGATGTGAAAAGCCA  
TGGGCTTAACCTGTGGACTGCATTTGAAACTGTCAGCTGGAGTGCCGGAGAGGTAAGCGGAATTCCTAGTGTAGCGGTG  
AAATGCGTAGATATTAGGAGGAACACCAGTGGCGAAGGCGGCTTACTGGACGTAACGACGTTGAGGCTCGAAAGCGTG  
GGGAG

>ASV:4343:Family:Lachnospiraceae

TACGTAGGGGGCAAGCGTTATCCGGATTTACTGGGTGTAAGGGGAGCGTAGACGGTAAGCAAGTCTGGAGTAAAACCC  
GGGGCTTAACCCCGGATTGCTTTGAAACTGTTGAACTGGAGTGACGAGAGGTAAGCGGAATTCCTAGTGTAGCGGTG  
AAATGCGTAGATATTAGGAGGAACACCAGTGGCGAAGGCGGCTTACTGGACTGTAACGACGTTGAGGCTCGAAAGCGTG  
GGGAG

>ASV:4344:Family:Lachnospiraceae

TACGTAGGGGGCAAGCGTTATCCGGATTTACTGGGTGTAAGGGGAGCGTAGGCGGTCTGGCAAGCCAGAAGTAAAAGCC  
GGGGCTTAACCTCGGGACTGCTTTGAAACTGTTAGACTAGAGTGTGCGAGAGGTAAGTGAATTCCTAGTGTAGCGGTG  
AAATGCGTAGATATTAGGAGGAACACCAGTGGCGAAGGCGGCTTACTGGACGATAACGACGCTGAGGCTCGAAAGCGTG  
GGGAG

>ASV:4345:Genus:Ruminococcaceae\_UCG-014

TACGTAGGGAGCGAGCGTTATCCGGATTTATTGGGTGTAAGGGTGCCTAGACGGGTAATCAAGTTAGTTGTGAAATCCC  
TCGGCTCAACTGAGGAACTGCAACTAAAAGTGGTTGTCTTGGAGTGCAGGAGAGGTAAGTGAATTCCTAGTGTAGCGGTG  
AAATGCGTAGATATTAGGAGGAACACCAGTGGCGAAGGCGACTTACTGGACTGTAACGACGTTGAGGCACGAAAGTGTG  
GGGAG

>ASV:4346:Phylum:Firmicutes

TACGTAGGGAGCGAGCGTTGTCCGGAATCATTGGGCGTAAAGAGGGAGCAGGCGGCCCAAGGCTCTGTGGTAAAAGCC  
GAAGCTAAACTTCGGTAAGCCATGAAACTGTCTGGCTCGAGTGCCGGAGAGGTAAGCGGAATTCCTAGTGTAGCGGTG  
AATGCGTAGATATTAGGAGGAACACCAGTGGCGAAGGCGGCTTACTGGACGATTACTGACGCTGAGGCTCGAAAGCGTG  
GGAGC

>ASV:4347:Kingdom:Bacteria

TACGTAGGTGGCAAGCGTTGTCCGGAATTTACTGGGTGTAAGGGGAGCGTAGGCGGGCAGGCAAGTCAGGCGTAAAATA  
TCGGCTCAACCGGTAACGGCGCTTAAACTGCAGGCTTGTAGTGAAGTAGAGTTGGCGGAATTCGTGGTGTAGCGGTG  
AATGCTTAGATATCACGAGAATCCGATTGCGAAGGCAGCTTACTGGACTGTAACGACGCTGATGCTCGAAAGTGTG  
GTATC

>ASV:4348:Family:Bifidobacteriaceae

TACGTAGGGTGCAAGCGTTATCCGGAATTTATTGGGCTAAAGGGCTCGTAGGCGGTCTTTAAGTCAGGAGTAAAAGCC  
ACGGCTCAACCGTAGTAAGCTCTTAAACTGGAGGACTTGTAGTGCAGGAGAGGAGAGTGAATTCCTAGTGTAGCGGTG  
AATGCTTAGATATCGGAAGAACCAATGGCGAAGGCAGCTCTCTGGCCGTTACTGACGCTGAGGAGCGAAAGCGTG  
GGAGC

>ASV:4349:Family:Lachnospiraceae

TACGTAGGGGGCAAGCGTTATCCGGATTTACTGGGTGTAAGGGGAGCGTAGACGGAGTGCAAGTCTGATGTGAAAACCC  
GGGGCTCAACCCCGGACTGCATTGAAACTGTCAATCTAGAGTACCGGAGAGGTAAGCGGAATTCCTAGTGTAGCGGTG  
AAATGCGTAGATATTAGGAGGAACACCAGTGGCGAAGGCGGCTCAACTGGACGATAACGACGCTGATGCTCGAAAGTGTG  
GGTAT

>ASV:4350:Genus:Prevotella\_9

TACGTAGGGGGCAAGCGTTATCCGGAATTTACTGGGTGTAAGGGTGCCTAGGCGGAGATTAAGCGTGTGTGAAATGTA  
GATGCTCAACATCTGAACTGCAGCGCAACTGTTTCTTGGAGTACGCACAAAGTGGCGGAATTCGTGGTGTAGCGGTG  
AAATGCTTAGATATACGAAGAATCCGATTGCGAAGGCAGCTCTTAAGCTGCAACTGACATTAAGGCTCGAAAGTGTG  
GGTAT

>ASV:4351:Genus:Dorea

TACGTATGGTGAAGCGTTATCCGGATTTACTGGGTGTAAGGGGAGCGTAGACGGCACGGCAAGCCAGATGTGAAAAGCC  
GGGGCTCAACCCCGGACTGCATTTGAAACTGCTGAGCTAGAGTGTGCGAGAGGCAAGTGAATTCCTAGTGTAGCGGTG  
AAATGCTTAGAGATACATACAGAACACCAGTGGCGAAGGCAGCTTACCAACTATATCTGACGTTGAGGCACGAAAGCGTG  
GGGAG

>ASV:4352:Genus:Oxalobacter

TACGTAGGGTGCAAGCGTTAATCCGGAATTTACTGGGCGTAAAGCGTGCAGGCGGTTGTGTAAGACAGATGTGAAATGCC  
CGGGCTTAACCTGGGACTGGCATTGTGACTGCACGGCTAGAGTGTGTGAGAGGGGGTAGAATTCACGTTGATGACGAGT  
AAATGCGTAGATATGTGGAGGAATACCGATGGCGAAGGCAGCCCCCTGGGATAACACTGACGCTCATGCACGAAAGCGTG  
GGGAG

>ASV:4353:Family:Peptococcaceae

TACGTAGGGAGCGAGCGTTGTCCGGAATTTACTGGGCGTAAAGGGGCGTGTAGGCGGGAATTTAAGTAAGGTGTGAGA  
CGGGCTTAACCTGGGACTGCATTTAAACTGGATTTCTTGGAGGCGAGGAGGAAAGTGAATTCCTAGTGTAGCGGTG  
AAATGCGTAGATATTAGGAGGAACACCAGTGGCGAAGGCGGCTTGTGACTGTTACTGACACTGAGGCACGAAAGCGTG  
GGGAG

>ASV:4354:Family:Ruminococcaceae

TACGTAGGTTGCGAGCGTTGTCCGGATTTACTGGGTGTAAGGGTGCCTAGGCGGGACGGCAAGTCAGATGTGAAATACC  
GCAGCTCAACTGCGGGGCTGCATTTGAAACTGCTGTTCTTGGAGTGCAGGAGAGGTAAGCGGAATTCACAGTGTAGCGGTG  
AAATGCGTAGATATTGGGAGGAACACCAGTGGCGAAGGCGGCTTACTGGACTGTAACGACGCTGAAGCACGAAAGCGTG  
GGGAT

>ASV:4355:Family:Ruminococcaceae

TACGTAGGGAGCGAGCGTTGTCCGGATTTACTGGGTGTAAGGGTGCCTAGGCGGGCAGCAAGTCAGTTGTGAAAACCTA

TGGGCTTAACCCATAACGTGCAATTGAAACTGTCCGGCTTGAAGTGAAGTAGAGGTAGCGGAATTCCTGGTGTAGCGGTG  
AAATGCGTAGAGATCATACAGAACCACCGATTGCGAAGGCAGCCCGCTAAGCTGCAACTGACATTGAGGCTCGAAAGTGTG  
GGTAT

>ASV:4356:Family:Ruminococcaceae

TACGTAGGGAGCGAGCGTTGTCCGGAATTACTGGGTGTAAGGGGAGCGTAGGCGGGACGGCAAGTCAGATGTGAAAACCTA  
TGGGCTCAACCCATAGCCTGCATTTGAAACTGTTGTTCTTGAAGTGTGGAGAGGCAATGAACTCCTAGTGTAGCGGTG  
AAATGCGTAGATATTAGGAAGAACCACAGTGGCGAAGGCGGTCAACTGGGCACCAACTGACGCTGAGGCTCGAAAGCATG  
GGTAG

>ASV:4357:Genus:Ruminococcaceae\_UCG-011

TACGTAGGGTGAAGCGTTATCCGGAATTACTGGGTGTAAGGGTGCCTAGGCGGCTTCTAAAGTCAGATGTGAAATACC  
GCAGCTCAACTGCGGGGCTGCATTTGAAACTTGGGAGCTTGAAGTGAAGTAGAGGTAAAGCGGAATTCCTAGTGTAGCGGTG  
GAATGCGTAGATATTAGGAGGAACACCAGTGGCGAAGGCGGCTTACTGGGCTTAACTGACGCTGAGGCACGAAAGCGTG  
GGGAG

>ASV:4358:Family:Ruminococcaceae

TACGTAGGGTGAAGCGTTATCCGGAATTACTGGGTGTAAGGGGCGGTAGGCGGAGATGCAAGTCAGATGTGAAATCCC  
CGGGCTTAACCCGGGAAGTGCATTTGAAACTGTATCCCTTGAAGTATCGGAGAGGCAATCGGAATTCCTAGTGTAGCGGTG  
AAATGCGTAGAGATGGGAGGAACACCAGTGGCGAAGGCGGCTGCTGGGCTTAACTGACGCTGAGGCACGAAAGCGTG  
GGTAG

>ASV:4359:Genus:Alistipes

TACGGAGGATTCAAGCGTTATCCGGAATTTATTGGGTTAAAGGGTGCCTAGGCGGTTTGATAAGTTAGAGGTGAAATACC  
GGTGCTTAACCCGGAACTGCCTCTAATACTGTTGAGCTAGAGAGTAGTTGCGGTAGGCGGAATGTATGGTGTAGCGGTG  
GAATGCGTAGATATCGGAGGAACACCAGTGGCGAAGGCGGCTTACTGGGCACCAACTGACGCTAAGGCTCAAAAGTGTG  
GGTAG

>ASV:4360:Family:Bifidobacteriaceae

TACGTAGGGAGCAAGCGTTGTCCGGATTTACTGGGTGTAAGGGTGCCTAGGCGGCTTTCGAAGTCAGATGTGAAATCTA  
TGGGCTCAACCCATAAACTGCTTTCAAACCTGTTTTCTTGAAGTGTGAGAGGTAGGCGGAATTCCTGGTGTAGCGGTG  
GAATGTGTAGATATCGGGAAGAACCACCAATGGCGAAGGCGGCTTCTGGGCCGTTACTGACGCTGAGGAGCGAAAGCGTG  
GGGAG

>ASV:4361:Family:Ruminococcaceae

TACGTAGGTCAAGCGTTGTCCGGAATTACTGGGTGTAAGGGGAGCGCAGGCGGGAAGACAAGTTGGAAGTGAATCTA  
TGGGCTCAACCCATAAACTGCATTTGAAACTGTAGAGCTTGAAGTGAAGTAGAGGCAGGCGGAATTCCTGGTGTAGCGGTG  
AAATGCGTAGATATCGGAGGAACACCAGTGGCGAAGGCGACTTACTGGGCACCAACTGACGCTGAGGCTCGAAAGCATG  
GGTAG

>ASV:4362:Order:Bacteroidales

TATGTAGGTGCAAGCGTTGTCCGGAATTACTGGGTGTAAGGGGAGCGTAGGCGGGATGGCAAGTAGAATGTTAAATCCA  
TCGGCTCAACCCGGTGGCTGCTTTCAAACCTGCGGTTCTTGAAGTGAACAGAGGTAGGCGGAATTCCTGGTGTAGCGGTG  
AAATGCTTAGATATCACGAAGAACTCCGATTGCGAAGGCGACTTACTGGATTGTAAGTGAAGTGAAGTGTGCTCGAAAGTGTG  
GTATC

>ASV:4363:Order:Rhodospirillales

TACGTAGGGGGCAAGCGTTATCCGGAATTACTGGGCGTAAAGGGTGTGTAGGCGGTTAAGTAAGATGGTGGTGAATGCC  
GGGGCTCAACCTCGGAATTGCCATTATGACTATTTAGCTAGAATGATGCAGAGGATAGGCGGAATACCCAGTGTAGAGGTG  
AAATTCGTAGATATTGGGTAGAACACCAGAGGCGAAGGCGGCTTACTGGGCATTGACTGGCGCTGAGGCACGAAAGCATG  
GGGAT

>ASV:4364:Family:Lachnospiraceae

TACGTAGGGGGCAAGCGTTATCCGGAATTTACTGGGTGTAAGGGTGCCTAGGCGGCTTTCGAAGTCAGATGTGAAATCTA  
TGGGCTCAACCCATAGCCTGCATTTGAAACTGCAGAGCTTGAAGTGCAGGAGGGTAAAGCGGAATTCAGGTGTAGGAGTG  
AAATTCGTAGATATCGGAGGAACACCAGTGGCGAAGGCGGCTTACTGGACGATAACTGACGCTGAGGCTCGAAAGCATG  
GGGAG

>ASV:4365:Family:Lachnospiraceae

TACGTAGGGGAGCAAGCGTTGTCCGGAATTTACTGGGTGTAAGGGTGCCTAGGCGGCTTTCGAAGTCAGATGTGAAAGCCC  
GGGGCTCAACCCGGGACTGCATTTGAAACTGCTGAGCTAGAGTGTGGAGAGGCAAGTGGAAATTCCTAGTGTAGCGGTG  
AAATGCGTAGATATTAGGAGGAACACCAGTGGCGAAGGCGGCTTACTGGACGACAACCTGACGCTGAGGAGCGAAAGCGTG  
GGGAG

>ASV:4366:Family:Ruminococcaceae

TACGTAGGGGAGCAAGCGTTATCCGGAATTTACTGGGTGTAAGGGGCGCGCAGGCGGGCCGGTAAGTTGGAAGTGAATCTA  
TGGGCTTAACCCATAAACTGCTTTCAAACCTGCTGGTCTTGAAGTGTGGAGAGGCAGGCGGAATTCCTAGTGTAGCGGTG  
AAATGCTTAGATATCACGAAGAACTCCGATTGCGAAGGCGAGCTTCTGGACTGTAAGTGAAGTGTGCTCGAAAGTGTG  
GGTAT

>ASV:4367:Genus:Ruminococcaceae\_UCG-010

TACGTATGGAGCAAGCGTTATCCGGAATTTACTGGGTGTAAGGGTGTGTAGGCGGGACGACAAGTCAGATGTGAAAATTTG  
CAGGCTCAACCTGGAAGTGCATTTGAAACTGCCGTTCTTGAAGTGTGGAGAGGTAAATGGAATTCCTGGTGTAGCGGTG  
AAATGCGTAGATATCGGAGGAACACCAGTGGCGAAGGCGGCTTACTGGACGACAACCTGACGCTGAGACACGAAAGCGTG  
GGGAG

>ASV:4368:Genus:Christensenellaceae\_R-7\_group

TACGTAGGGGGCAAGCGTTGTCCGGAATGATTGGGCGTAAAGGGGCGCGTAGGCGGCTGATAAGTTTGAAGTGAAGTCC  
TTCTTTAAGGAGGGAACTGCTTTGAAACTGTCGGGCTTGAAGTGTGGAGAGGTAAAGCGGAATTCCTGGTGTAGCGGTG  
GAATGCGTAGATATCGGAGGAACACCAGTGGCGAAGGCGGCTTACTGGGCACCAACTGACGCTGAGGCTCGAAAGTGTG  
GGTAG

>ASV:4369:Species:aureus  
TACGTAGGTGGCAAGCGTTATCCGGAATTATTGGGCGTAAAGCGCGCTAGGCGGTTTTTAAAGTCTGATGTGAAAGCCC  
ACGGCTCAACCGTGGAGGTCATTGAAACTGGAAACTTGTAGTGCAGAAGAGGAAAGTGGAAATCCATGTGTAGCGGTG  
AAATGCGCAGATATGGAGGAGCACCAGTGGCGAAGGCGACTTTCTGGTCTGTAAC TGACGCTGATGTGCGAAAGCGTG  
GGGAT

>ASV:4370:Order:Bacteroidales  
TACGGAGGATCCGAGCGTTATCCGGATTTATTGGGTTAAAGGGAGCGTAGACGGCAAGGCAAGTCTGATGTGAAAACCC  
AGGGCTTAACCCGACTGCATTGAAACTGTCTGGCTCGAGTCCGGAGAGGTAAGCGGAATTCCTAGTGTAGCGGTG  
AAATGCGTAGATATCACGAAGAACTCCGATTGCGAAGGCAGCTTACTAACCTGTAAC TGACATTGATGCTCGAAAGTGTG  
GGTAT

>ASV:4371:Family:Lachnospiraceae  
TACGTAGGGGGCAAGCGTTATCCGGATTTACTGGGTGTAAGGGAGCGTAGACGGAAAGCAAGTCTGATGTGAAAGGCT  
GGGGCTTAACCCGACTGCATTGAAACTGTTGTTCTAGAGTGCAGGAGAGGTAAGCGGAATTCCTAGTGTAGCGGTG  
AAATGCTTAGATATCACGAAGAACTCCGATTGCGAAGGCAGCTCACTAGACTGCAACTGACACTGAGGCTCGAAAGTGTG  
GGTAT

>ASV:4372:Order:Bacteroidales  
TACGGAGGATCCGAGCGTTATCCGGATTTATTGGGTTAAAGGGAGCGTAGGTGGATTGTTAAGTCAGTTGTGAAAGTTT  
GCGGCTCAACCCGACTGCATTGAAACTGGCAGTCTTGTAGTACAGTAGAGGTAGGCGGAATTCCTAGTGTAGCGGTG  
AAATGCGTAGAGATTAGGAAGAACCAGTGGCGAAGGCGACTTTCTGGACGAAAAC TGACGCTGAGGCGCAAGCGTG  
GGGAG

>ASV:4373:Genus:Hydrogenoanaerobacterium  
TACGTGGGGAGCGAGCGTTGTCGGAACTACTGGGTGTAAGGGAGCGTAGGCGGAACAGCAAGTTGAATGTGAAATCTA  
TGGGCTCAACCCATAAACTGCATTGAAACTGTTGTTCTTGTAGTGAAGTAGAGGTAGGCGGAATTCCTAGTGTAGCGGTG  
AAATGCGTAGATATTAGGAGGAACACCAGTGGCGAAGGCGGCTTACTGGACGTAAC TGACGTTGAGGCTCGAAAGCGTG  
GGGAG

>ASV:4374:Family:Lachnospiraceae  
TACGGAGGATCCGAGCGTTATCCGGATTTACTGGGTGTAAGGGAGCGTAGACGGTTTAGCAAGTCTGAAGTGAAGCC  
GGGGCTCAACCCGACTGCATTGAAACTGTTAGACTTGTAGTGCAGGAGAGGTAAGTGGAAATTCCTAGTGTAGCGGTG  
AAATGCTTAGATATCACGAAGAACTCCGATTGCGAAGGCAGCTGCTAAGCTGCAACTGACATTGAGGCTCGAAAGTGTG  
GGTAG

>ASV:4375:Genus:Tyzzerella\_3  
TGCATGGTGCAAGCGTTATCCGGATTTACTGGGTGTAAGGGGTGAGTAGGCGGTCATGCAAGTCATATGTGAAATGT  
AGGGCTTAACCTTGGGCTGCATAAGAACTGTATGACTAGAGTGCAGGAGAGGTAAGCGGAATTCCTAGTGTAGCGGTG  
AAATGCGTAGATATTAGGAAGAACCAGTGGCGAAGGCGGCTTACTGGACTGTTACTGACGCTGAGGCTCGAAAGTGTG  
GGTAG

>ASV:4376:Genus:Fournierella  
AACGTAGGTGGCAAGCGTTGTCGGAACTACTGGGTGTAAGGGAGCGCAGGCGGATTGCAAGTTGGAAGTGAACCC  
TGGGCTCAACCCATGACTGCTTTCAAACACTGCAGATCTTGTAGTGGTGTAGAGGTAGGCGGAATTCCTGGTGTAGCGGTG  
GAATGCGTAGATATCGGGAGGAACACCAGTGGCGAAGGCGGATTGCTGGACGATAAC TGACGTTGAGGCGCAAGCGTG  
GGGAG

>ASV:4377:Genus:Delftia  
TACGTAGGGTGCAGCGTTAATCCGGAATTACTGGGCGTAAAGCGTGCAGGCGGCTATGTAAGACAGATGTGAAATCCC  
CGGGCTCAACCTGGAACTGCATTTGTGACTGCATGGCTAGAGTACGGTAGAGGGGATGGAATTCGCGTGTAGCAGTG  
AAATGCGTAGATATGCGGAGGAACACCAGTGGCGAAGGCAATCCCTGGACCTGACTGACGCTCATGCACGAAAGCGTG  
GGGAG

>ASV:4378:Species:denticolens  
TACGTAGGGTGCAGCGTTGTCGGATTTATTGGGCGTAAAGGGCTCGTAGGCGGTTCTGTCGCTGTTGTTGTTGAAAGCCC  
GCTGCTTAACCGTGGTTTTGCGTTGGATACGGGCGGGCTTGTAGTGCAGTAGGGGAGACTGGAATTCCTGGTGTAAAGCGTG  
GAATGTGTAGATATCGGGAAGAACCCTATGGCGAAGGCAGTCTCTGGGCTTACTGACGCTGAGGAGCGAAAGCGTG  
GGGAG

>ASV:4379:Genus:Ruminococcaceae\_UCG-003  
TACGTAGGGTGCAGCGTTGTCGGATTTACTGGGTGTAAGGGCGTGCAGCCGGGATGCAAGTCAGATGTGAAATCTC  
AGGGCTTAACCTGAACTGCATTTGAAACTGTATGTCTTGTAGTGCAGGAGAGGTAATCGGAATTCCTAGTGTAGCGGTG  
AAATGCGTAGATATTAGGAGGAACACCAGTGGCGAAGGCGGCTGCTGGGCTTAACTGACGCTGAGGACGAAAGCGTG  
GGTAG

>ASV:4380:Kingdom:Bacteria  
TACGTATGGTGCAGCGTTATCCGGATTTACTGGGTGTAAGGGAGCGTAGGCGGGATGGCAAGTAGAATGTTAAATCCA  
TCGGCTCAACCGGTGGCTGCGTTCAAACACTGCCGTTCTTGTAGTGAAGTAGAGGCAGGCGGAATTCCTAGTGTAGCGGTG  
AATGCTTAGATATCACGAAGAACTCCGATTGCGAAGGCAGCTCACTAGACTGTTACTGACACTGATGCTCGAAAGTGTG  
GGAGC

>ASV:4381:Family:Ruminococcaceae  
TACGTAGGTCCGAGCGTTGTCGGATTTATTGGGTGTAAGGGCGCGTAGGCGGAGAGACAAGTCAAGTGTGAAATCTA  
TGGGCTTAACCCATAAACTGCATTTGAAACTATCTCCCTTGTAGTGTAGGAGAGGCAAGCGGAATTCCTAGTGTAGCGGTG  
AAATGCGTAGATATTAGGAGGAACACCAGTGGCGAAGGCGGCTTACTGGACGTTAAGTACGCTTGTAGGCTCGAAAGCGTG  
GGGAG

>ASV:4382:Family:Christensenellaceae  
TACGTAGGGAGCGAGCGTTGTCGGAACTACTGGGCGTAAAGGGTGCAGTGGCGGCTGTTAAGTCAAGTGTGAAATACC  
CGTGCTCAACATGGGGGTGCATCTGATACTGTTAGGCTTGTAGTGCAGGAGAGGAAAGCGGAATTCCTAGTGTAGCGGTG

AAATGCGTAGATATTAGGAGGAACACCAGTGGCGAAGGCGACTTTCTGGGCCGTAACGACGCTGAGGCGCGAAAGCGTG  
GGGAG  
>ASV:4383:Family:Lachnospiraceae  
TACGTAGGGGGCAAGCGTTATCCGGATTTACTGGGTGTAAGGGAGCGTAGACGGCGAAGCAAGTCTGAAGTGAAAACCC  
AGGGCTCAACCTGGGACTGCTTTGAAAAGTGTCTTGGCTTGGTGTGCGGAGGGTAAGTGAATTCCTAGTGTAGCGGTG  
AAATGCGTAGATATTAGGAGGAACACCAGTGGCGAAGGCGGCTTACTGGACTGTAACGACGTTGAGGCTCGAAAGCGTG  
GGGAG  
>ASV:4384:Order:Clostridiales  
TACGGAGGATCCGAGCGTTATCCGGATTTATTGGGTTAAAGGGAGCGTAGGCGGTTTGATAAGTTAGAGGTGAAATTC  
GGGGCTCAACCCGGTACTGCATTGAAAAGTGTCTACTAGAGTGTGCGGAGGGTAAGTGAATTCCTAGTGTAGCGGTG  
AAATGCGTAGATATTAGGAGGAACACCAGTGGCGAAGGCGGCTGCTGGGCTTAACTGACGCTGAGGCACGAAAGCGTG  
GGTAG  
>ASV:4385:Genus:Lachnoclostridium  
TACGTAGGGGGCAAGCGTTATCCGGATTTACTGGGTGTAAGGGAGCGTAGACGGCGAAGCAAGTCTGAAGTGAAAACCC  
AGGGCTCAACCTGGGACTGCTTTGAAAAGTGTCTTGGCTAGAGTGTGCGGAGGGTAAGCGGAATTCCTAGTGTAGCGGTG  
AAATGCGTAGATATTAGGAGGAACACCAGTGGCGAAGGCGGCTTACTGGACAGTAACGACGTTGAGGCTCGAAAGCGTG  
GGGAG  
>ASV:4386:Genus:Actinomyces  
TACGTAGGGCGCGAGCGTTGTCCGGAATTATTGGGCGTAAAGGGCTTGTAGGCGGTTGGTCCGCTGCTCCGTGAAATTC  
CTGGCTTAACTGGGGCGTGCAGTGGGTACGGGCTGACTTGTAGTGTGCGGAGGGGACTGGAATTCCTGGTGTAGCGGTG  
GAATGCGCAGATATCAGGAAGAACACCAGTGGCGAAGGCGGCTGCTGGGCTTAACTGACGCTGAGGCACGAAAGCGTG  
GGGAG  
>ASV:4387:Kingdom:Bacteria  
TACGGAGGATCCGAGCGTTATCCGGATTTATTGGGTTAAAGGGAGCGTAGATGGATGTTTAAAGTCAGTTGTGAAAAGTTT  
GCGGCTCAACCGTAAAATTGCAAGTGTACTGGATGTCTTGTAGTGTGCGGAGGGTAAGTGAATTCCTAGTGTAGCGGTG  
AAATGCGTAGATATTAGGAGGAACACCAGTGGCGAAGGCGGCTTACTGGACGATAACTGACGCTGAGGCTCGAAAGCGTG  
GGGAG  
>ASV:4388:Order:Bacteroidales  
TACGGAGGATCCGAGCGTTATCCGGATTTATTGGGTTAAAGGGAGCGTAGATGGATGTTTAAAGTCAGTTGTGAAAAGTTT  
GCGGCTCAACCGTAAAATTGCAAGTGTACTGGTTTCTTGTAGTGTGCGGAGGGTAAGTGAATTCCTGGTGTAGCGGTG  
GAATGCGTAGATATCAGGAAGAACACCAATGGCGAAGGCGAGTCTCTGGGCGTTACTGACGCTGAGGAGCGAAAGCGTG  
GGGAG  
>ASV:4389:Genus:Gordonibacter  
TACGTATGGTCAAGCGTTATCCGGATTCATTGGGCGTAAAGCGCGCTAGGCGGCCGTCAGCGGAACCTCTAACCCG  
AGGGCTCAACCCCGTTCGGTTCGAACTGGCAGGCTCAGTGTGGTAGAGGAAGTGAATTCCTGGTGTAGCGGTGG  
AATGCGCAGATATCGGAAGAACACCAGTGGCGAAGGCGAGTCTCTGGGCCATCAACTGACGCTGAGGCGCGAAAGGTG  
GGTAG  
>ASV:4390:Genus:F0332  
TACGTAGGGCGCGAGCGTTGTCCGGAATTATTGGGCGTAAAGGGCTCGTAGGCGGCTTGTCCGCTGCTGTGAAAATGC  
GGGGCTTAACTCCGTACGTGCAGTGGGTACGGGCGAGCTAGAGTGTGCGGAGGGGACTGGAATTCCTGGTGTAGCGGTG  
GAATGCGCAGATATCAGGAGGAACACCAGTGGCGAAGGCGAGTCTCTGGGCGTACTGATGCTGAGGCACGAAAGCGTG  
GGTAG  
>ASV:4391:Class:Bacteroidia  
TACGGAGGATCAAGCGTTATCCGGATTTATTGGGTTAAAGGGAGCGTAGGCGGGTTGTTAAGTCAGTTGTGAAAAGTTT  
GCGGCTCAACCGTAAAATTGCAAGTGTACTGGCGACTTGTAGTGTGCAACAGAGGTAGGCGGAATTCCTGGTGTAGCGGTG  
GAATGCGCAGATATCAGGAAGAACACCAGCGGCGAAGGCGAGTCTCTGGGCCGAAAGTGTGACGCTGAGGCGCGAAAGCTGG  
GGGAG  
>ASV:4392:Genus:Dialister  
TACGTAGGTGGCAAGCGTTGTCCGGAATTATTGGGCGTAAAGCGCGCGAGGCGGCTTCCCAAGTCCCTCTTAAAAGTGC  
GGGGCTTAAACCCGTGATGGGAAGGAAACTGGGAAGCTGGAGTATCGGAGAGGAAAGTGAATTCCTAGTGTAGCGGTGA  
AATGCGTAGAGATTAGGAAGAACACCAGTGGCGAAGGCGAGTCTACTGGATTGTAACGACGCTGATGCTAGAAAAGTGTG  
GTATC  
>ASV:4393:Family:Ruminococcaceae  
TACGTAGGGAGCGAGCGTTGTCCGGATTTACTGGGTGTAAGGGTGCCTAGGCGGCACGCCAAGTCAGCGGTGAAATTC  
CGGGCTCAACCCGGAGTGTGCCGTTGAAACTGGCGAGCTAGAGTACACAAGAGGCGAGCGGAATTCCTAGTGTAGCGGTG  
AAATGCGTAGATATTAGGAGGAACACCAGTGGCGAAGGCGGCTGCTGGGCTTAACTGACGCTGAGGCACGAAAGCATG  
GGGAG  
>ASV:4394:Family:Clostridiales\_vadinBB60\_group  
TACGTAGGTGGCAAGCGTTATCCGGAATGACTGGGCGTAAAGGGTGCCTAGGTTGGTTTGGAAGTTGGCGGCGTAATTC  
GAGGCTCAACCTCGGCGCTACCGCCAAAAGTGTGGACTTGTAGTGTGCGGAGGGGTAAGTGAATTCCTAGTGTAGCGGCG  
GAATGCGTAGATATTAGGAGGAACATCGGTGGCGAAGGCGACTTACTGGACTGTAACGACACTGAGGCACGAAAGCGTG  
GGGAG  
>ASV:4395:Family:Lachnospiraceae  
TACGTATGGTCAAGCGTTATCCGGATTTACTGGGTGTAAGGGAGTGTAGGTGGCCATGCAAGTCAGAAGTGAAAATCC  
GGGGCTCAACCCGGAAGTGTCTTTGAAAAGTGTAAAGGCTAGAGTGTGCGGAGGGGTAAGTGAATTCCTAGTGTAGCGGTG  
AAATGCGTAGAGATGGGAGGAACACCAGTGGCGAAGGCGGCTGCTGGGCTTAACTGACGCTGAGGCACGAAAGCGTG  
GGTAG  
>ASV:4396:Order:Clostridiales

TACGTAGGGAGCGAGCGTTGTCCGGAATTACTGGGCGTAAAGAGCATGTAGGCGGCTTAATAAGTCGAGCGTGAAAATGC  
GGGGCTCAACCCCGTATGGCGCTGAAACTGTTAGTCTTGAGTGCCGGAGAGGTAAGCGGAATTCCTAGTGTAGCGGTGA  
AATGCGTAGATATTAGGAGGAACATCAGTGGCGAAGGCGGCTTACTGGGCTTTAACTGACGCTGAGGCTCGAAAAGCGTGG  
GGAG

>ASV:4397:Genus:Barnesiella

TACGTAGGGGGCAAGCGTTGTCCGGATTTACTGGGTGTAAAGGGTGCCTAGGCGGCACGCCAAGTCAGCGGCGAAATTTT  
CGGGCTCAACCCGGACTGTGCCGTTGAAACTGGCGAGCTAGAGTGACAAGAGGCGAGCGGAATGCGTGGTGTAGCGGTG  
AATGCGTAGATATCACGAGAACCCCGATTGCGAAGGCAGCTTACTAAACCATAACTGACACTGAAGCACGAAAAGCGTG  
GGGAT

>ASV:4398:Genus:Ruminococcaceae\_UCG-002

TACGTAGGTGGCAAGCGTTGTCCGGATTTACTGGGTGTAAAGGGCGTGCAGCCGGTCTGCAAGTCAGATGTGAAATCCA  
TGGGCTCAACCCATGAACTGCATTTGAAACTGTAGATCTTGAGTGTCCGGAGGGGCAATCGGAATTCCTAGTGTAGCGGTG  
AATGCGTAGATATCACGAAGAACCCGATTGCGAAGGCAGCCCCCTGGGATGCGACTGACGCTCATGCACGAAAAGCGTG  
GGGAG

>ASV:4399:Species:arctica

TACGGAGGGTGCAGCGTTAATCGGAATTACTGGGCGTAAAGCGCGCTAGGCGGTTAATTAAGTCAGATGTGAAATCCC  
AGGGCTCAACCTTGGAACTGCATTTGAAACTGGTTAACTAGAGTTTTGTAGAGGGTGGTAGAATTTCCAGGTGTAGCGGTG  
AATGCGTAGATATCAAGGAATACAGTGGCGAAGGCGGCCACCTGGACAAAGACTGACGCTGAGGCGCGAAAAGCGTG  
GGGAG

>ASV:4400:Order:Clostridiales

TACGTAGGGGGCGAGCGTTGTCCGGAATTACTGGGCGTAAAGGGTGCCTAGGCGGTTTGGTAAGTTGGATGTGAAATACC  
CGGGCTTAACTTGGGGGCTGCATCAATACTGTCCGACTTGAGTGCAGGAGAGGAAAGCGGAATTCCTAGTGTAGCGGTG  
AATGCGTAGATATTAGGAGGAACCCGTTGGCGAAGGCGGCTTTCTGGACTGTAACGACGCTGAGGCGCGAAAAGCGTG  
GGGAG

>ASV:4401:Order:Bacteroidales

TACGTAGGTGGCGAGCGTTATCCGGATTTATTGGGTTAAAGGGTGCCTAGGCGGTTTGATAAGTTGGAGGTGAAATTTCC  
GGGGCTCAACCTGAACGTGCCTCTAATACTGTTGAGCTAGAGAGTAGTTGCGGTAGCGGGAATGCGTGGTGGAGCGGTG  
AATGCGTAGATATCACGAGAACCCCGATTGCGAAGGCAGCTGCTAGGGTGCACAGACGCTGAGGCGCGAAAAGCGTG  
GGTAT

>ASV:4402:Genus:Meribacter

TACGTAGGTGGCGAGCGTTATCCGGAATGATTGGGCGTAAAGGGTGCCTAGGTGGCACGATAAGTCTGGAGTAAAAGGGA  
GCGGCTCAACCGCTGTTGGCTCTGGAACTGTCGAGCTAGAGAGCAGGAGAGGGGCGATGGAATTCATGTGTAGCGGTAA  
AATGCGTAGATATATGAGGAACACCCGTTGGCGAAGGCGGCTGCCTGGCCTGCAACTGACACTGAAGCACGAAAAGCGTG  
GGAG

>ASV:4403:Genus:Bilophila

TACGTAGGGGGCAAGCGTTGTCCGGAATAATTGGGCGTAAAGCGCACGTAGGCGGCTTGGTAAGTCAGGGGTGAAATCCC  
ACAGCCCAACTGTGGAAGTGCCTTTGATACTGCCAGGCTTGAGTACCAGGAGGGTGGCGGAATTCAGGTGTAGGAGTG  
AATCCGTAGATATCTGAGGAACACCCGTTGGCGAAGGCGGCCACCTGGACGGTAACGACGCTGAGGTGCGAAAAGCGTG  
GGTAG

>ASV:4404:Genus:Alistipes

TACGGAGGATCAAGCGTTATCCGGATTTATTGGGTTAAAGGGTGCCTAGGCGGTTTGATAAGTTAGAGGTGAAAGCTC  
GATGCTCAACATCGAAATTGCCTCTGATACTGTCCAGACTAGAGTGTAGTTGCGGAAGGCGGAATGTGTGGTGTAGCGGTG  
AATGCGTAGATATTAGGAGGAACACCCAGTGGCGAAGGCGGCTCAACTGGACGATAACTGACGCTGAGGCGCGAAAAGCGTG  
GGGAG

>ASV:4405:Genus:Christensenellaceae\_R-7\_group

TACGTAGGGGGCAAGCGTTGTCCGGAATAATTGGGCGTAAAGGGCGTGCAGGCGGCTCGGTAAGTCTGGAGTAAAAGTCC  
TGCTTTTAAAGTGGGAATGCTTTGATACTGTCCGACTAGAGTGTCCGGAGGGTAAAGTGGAAATTCCTAGTGTAGCGGTG  
AATGCGTAGATATTAGGAGGAACACCCAGTGGCGAAGGCGGCTTACTGGACGATTACTGACGCTGAGGCGCGAAAAGCGTG  
GGGAG

>ASV:4406:Order:Clostridiales

TACGTAGGGAGCGAGCGTTATCCGGATTTACTGGGTGTAAAGGGCGTGCAGGCGGGAAGCAAGTCAGATGTGAAAACCA  
GTGGCTCAACCACTGGCCTGCATTTGAAACTGTTTTCTTGAGTACAGTAGAGGCGAGGCGGAATTCGTGGTGTAGCGGTG  
AATGCTTAGATATCACGAAGAACCCGATTGCGAAGGCAGCTGCTGGACTGTAACGACACTGATGCTCGAAAAGTGTG  
GGTAT

>ASV:4407:Family:Ruminococcaceae

TACGTAGGTGGCAAGCGTTGTCCGGAATTACTGGGTGTAAAGGGAGCGAGGCGGGAAGCAAGTCAGCTGTGAAATCCA  
TGGGCTTAAACCCATGAACTGCAGTTGAAACTGTTTTCTTGAGTGAAGTAGAGGTTGGCGGAATTCAGTGTAGCGGTG  
AATGCGTAGATATTAGAAGGAACACCCAGTGGCGAAGGCGGCTTCTGGCCATCACTGACGCTGAGGAACGAAAAGCGTG  
GGGAG

>ASV:4408:Family:Lachnospiraceae

TACGTAGGGGGCAAGCGTTATCCGGATTTACTGGGTGTAAAGGGAGCGAGGCGGTTGCGGTAAGTCAGATGTGAAAACCC  
GGGGCTCAACCCCGGACTGCATTTGAAACTGTATTTCTTGAGTACTGGAGAGGCAATCGGAATTCCTAGTGTAGCGGTG  
AATGCGTAGATATTAGGAGGAACACCCAGTGGCGAAGGCGGATTGCTGGACAGCAACTGACGCTGAGGCGCGAAAAGTGTG  
GGGAG

>ASV:4409:Family:Ruminococcaceae

AACGTAGGGTGCAGCGTTGTCCGGAATTACTGGGTGTAAAGGGAGCGAGGCGGGAAGACAAGTTGGAAGTAAAACCA  
TGGGCTCAACCCATGAATGCTTTCAAACCTGTTTTCTTGAGTGCAGGAGAGGGAAGCGGAATTCCTAGTGTAGCGGTG  
AATGCGTAGATATTAGGAGGAACACCCAGTGGCGAAGGCGGCTTCTGGACTGTAATGACGCTGAGGCTCGAAAAGCGTG

GGGAG  
>ASV:4410:Species:fossor/minutum  
TACGTATGGAGCAAGCGTTATCCGGATTACTGGGCGTAAAGCGCTCGTAGCGGTCTGTTAGTTCGGTAAAGTTAAATCC  
GGGGCTCAACCCCGTCCGCTTCCGATACCCGCGAGCTTGAGTTTGGTAGGGGAAGGTGGAATTCCTAGTGTAGCGGTG  
GAATGCGCAGATATTAGGAAGAACCACCGTGGCGAAGGCGCCTTCTGGCCATAACTGACGCTGAGGAGCGAAAGCTAG  
GGGAG  
>ASV:4411:Family:Ruminococcaceae  
TACGTAGGGAGCAAGCGTTTCCGGATTACTGGGTGTAAGGGTGCCTAGGCGGATTGGCAAGTCAGAAGTAAAATCCA  
TGGGCTTAACCCATGAAGTCTTTTGAAGTCTTACTGAGTGAAGTAGAGGTAAGCGGAATTCCTAGTGTAGCGGTG  
AAATGCGTAGATATCGCACAGAACCAGTTCGGAAGGCAGCTTTCCAAGCTATTACTGACGCTGAGGCACGAAAGCGTG  
GGGAG  
>ASV:4412:Genus:Bacteroides  
TACGGAGGATCCGAGCGTTATCCGGATTATTGGGTTAAAGGGAGCGTAGGTGGACTGGTAAGTCAGTTGTAAAAGTTT  
GCGGCTCAACCGTAAAATTGCAAGTGTACTGCTGAGTACAGTAGAGGTGGCGGAATTCGTGGTGTAGCGGTG  
AAATGCTTAGATATCACGAACAACCAGTTCGGAAGGCAGCTCACTGGACTGCAACTGACACTGATGCTCGAAAGTGTG  
GGTAT  
>ASV:4413:Genus:Haemophilus  
TACGGAGGGTGCAGCGTTAATCCGGAATAACTGGGTGTAAGGGCACGCAGGCGGTGACTTAAGTAGGTGTAAAAGCC  
CGGGCTTAACCTGGGAATTGCATTTCACTAGGTCGCTAGAGTACTTTAGGGAGGGGTAGAATTCACGCTGTAGCGGTG  
AAATGCGTAGAGATGTGGAGGAATACCGAAGGCTAAGGCAGCCCTTGGGAATGTACTGACGCTCATGTGCGAAAGCGTG  
GGGAG  
>ASV:4414:Family:Lachnospiraceae  
TACGTAGGGGGCAAGCGTTTCCGGATTACTGGGTGTAAGGGAGCGTAGACGGTATGGCAAGTCTGATGTAAAAGGCC  
AGGGCTCAACCTGGGACTGCATTGGAAGTGTGCAACTAGAGTGTGGAGAGGCAAGTGGAAATTCCTAGTGTAGCGGTG  
AAATGCGTAGATATCGGGAGGAACACCAGTGGCGAAGGCGCCTACTGGGCACCAACTGACGCTGAGGCTCGAAAGTGTG  
GGTAG  
>ASV:4415:Order:Bacteroidales  
TACGGAGGATCCGAGCGTTATCCGGATTATTGGGTTAAAGGGAGCGTAGATGGATGTTTAAAGTCAGTTGTAAAAGTTT  
GCGGCTCAACCGTAAAATTGCAAGTGTAGGTCTTACTGAGTACCGGAGAGGTTATCGGAATTCCTTGTGTAGCGGTG  
AAATGCGTAGATATAAGGAAGAACCAGTGGCGAAGGCGCTCACTGGACTGTAAGTACACTGAGGCTCGAAAGCGTG  
GGGAG  
>ASV:4416:Order:Mollicutes\_RF39  
TACGTAGGTGGCGAGCGTTATCCGGATTATTGGGCGTAAAGGGTGCCTAGGCGGTTTGTAAAGTATAAAATGAAATCCC  
GAAGCTTAACCTCGGTTTGTATAAACTGGCAGACTTGAGTACAGTAGAGGCAAAATGGAATTCCTAGTGTAGTGGTAA  
AATGCGTAGATATTAGGAGGAACACCAGTGGCGAAGGCGATTGCTGGGCTGTAAGTACGCTGAGGCACGAAAGCGTG  
GGAGC  
>ASV:4417:Genus:Prevotella  
TACGGAGGATCCGAGCGTTATCCGGATTATTGGGTTAAAGGGAGCGTAGGCGGTTTGGTAAGCGTGTGTGAAATGTA  
GGAGCTCAACTTCTAGATTGCAGCGCAACTGTCAGACTTGAGTGCACACAGTAGGCGGAATTCATGGTGTAGCGGTG  
AAATGCTTAGATATCATGAAGAACTCCGATTGCGAAGGCAGCTTACGGAGCGCAACTGACGCTGAAGCTCGAAGGTGCG  
GGTAT  
>ASV:4418:Genus:Ruminococcaceae\_NK4A214\_group  
AACGTAGGTGGCAAGCGTTATCCGGATTACTGGGTGTAAGGGCGCGTAGGCGGGAATGCAAGTCAGATGTGAAATCCA  
AGGGCTCAACCTTGAAGTGCATTTGAAACTGATTTCTTACTGAGTGTGGAGAGGTTGACGGAATTCCTAGTGTAGCGGTG  
AAATGCGTAGAGATTAGGAAGAACCACCGTGGCGAAGGCGACTTTCTGGACGAAAATGACGCTGAGGCACGAAAGCGTG  
GGGAG  
>ASV:4419:Genus:Porphyromonas  
TACGGAGGATGCGAGCGTTATCCGGAATTATTGGGTTAAAGGGTGCCTAGGTTGCAAGGGAAGTCAGGGGTGAAAAGCT  
GTAGCTCAACTATGGTCTTGCCTTTGAAACTCTCTAGCTAGAGTGTACTGGAGGTACGTGGAACGTGTGGTGTAGCGGTG  
AAATGCGTAGATATCACACAGAACCAGTTCGCGAGGCAGCGTACTACATTACAAGTACACTGAAGCACGAAAGCGTG  
GGGAG  
>ASV:4420:Family:Ruminococcaceae  
TACGTAGGGAGCGAGCGTTTCCGGATTACTGGGTGTAAGGGAGCGTAGGCGGGATGGCAAGTTGGGTGTCAAATCTA  
CCGGCTCAACCCGGTAGCCGACTCAAAACTGCCGTTCTTACTGAGTGAAGTAGAGGCAAGCGGAATTCCTAGTGTAGCGGTG  
AATGCGTAGATATTAGGAGGAACACCAGTGGCGAAGGCGCCTGCTGGGCTTTTACTGACGCTGAGGCTCGAAAGTGTG  
GGAGC  
>ASV:4421:Family:Ruminococcaceae  
TACGTAGGTGGCAAGCGTTTCCGGATCTACTGGGTGTAAGGGCGGTAGGCGGGAAGACAGGTGAGATGTGAAATGTC  
GGGGCTCAACCCGGAACTGCATTTGAAACCTTTTTCTTACTGAGTATCGGAGAGGCAGCGGAATTCCTAGTGTAGCGGTG  
AAATGCGTAGATATTAGGAGGAACACCAGTGGCGAAGGCGCCTACTGGGCACCAACTGACGCTGAGGCTCGAAAGTGTG  
GGTAG  
>ASV:4422:Family:Lachnospiraceae  
TACGTAGGGGGCAAGCGTTATCCGGATTATTGGGTTAAAGGGTGCCTAGGCGGCCGTCAGTCAAGTCAGCGGTAAAATTC  
GGGGCTCAACCCGGGACTGCATTGGAAGTGCCTGCTTACTGAGTGCAGGAGAGGTAAGCGGAATTCCTAGTGTAGCGGTG  
AAATGCGTAGATATTAGGAAGAACCAGTGGCGAAGGCGCCTACTGGACGTAAGTACGCTTGGGCTCGAAAGCGTG  
GGGAG  
>ASV:4423:Order:Clostridiales  
TACGTAGGGAGCGAGCGTTTCCGGATTACTGGGTGTAAGGGTGCCTAGGCGGGATGGCAAGTCAAGTGTGAAATGCC

GGGGCTCAACCCGCTGACTGCATTGAAACTGTTTTGCTTGTAGTGCCGGAGAGGTAAGCGGAATTCCTAGTGTAGCGGTG  
AAATGCGTAGAGATTAGGAAGAACCACCGTGGCGAAGGCGACTTTCTGGACGAAAACGACGCTGAGGCGCAAAGCGTG  
GGGAG  
>ASV:4424:Family:Ruminococcaceae  
TACGTAGGGAGCAAGCGTTGTCCGGATTTACTGGGTGTAAGGGTGCCTAGGCGGTTTGGTAAGTCAGAAGTGAATCCA  
TGGGCTCAACTCGTGAAGTGCATTTGAAACTACTCTTCTTGTAGTATCGGAGAGGCAATCGGAATTCCTAGTGTAGCGGTG  
AAATGCGTAGATATTAGGAGGAACACCAGTGGCGAAGGCGACTTTCTGGACGTAACGACGTTGAGGCACGAAAGTGTG  
GGGAG  
>ASV:4425:Genus:Ruminococcaceae\_UCG-010  
TACGTAGGTGGCAGCGTTATCCGGATTTACTGGGTGTAAGGGTGTGTAGGCGGGACTGCAAGTCCGATGTGAAAATCA  
CAGGCTTAACCTGTGACCTGCATTCGAAACTGTGGTTCTTGGGGTCCGAGAGGTAACGGAATTCCTGGTGTAGCGGTG  
AAATGCGTAGATATCAGGAGGAACACCAGTGGCGAAGGCGGTTACTGGACGATTACTGACGCTGAGACACGAAAGCGTG  
GGGAG  
>ASV:4426:Family:Peptococcaceae  
TACGTAGGGAGCAGCGTTGTCCGGAATCACTGGGCGTAAAGGGCGCTAGGCGGCAATATAAGTCAGATGTGAAAGGTG  
AGGGCTCAACCTTAGACTGCATCTGATACTGTATAGCTTGTAGTGTGAGAGAGGAAAGCGGAATTCCTAGTGTAGCGGTG  
AAATGCGTAGATATTAGGAGGAACACCAGTGGCGAAGGCGGCTTTCTGGCTCATAACTGACGCTGAGGCGCAAAGCGTG  
GGGAG  
>ASV:4427:Kingdom:Bacteria  
TACGTAGGTGGCAAGCGTTGTCCGGATTTATTGGGTTAAAGGGAGCGTAGGCGGGTTGTTAAGTCAGTTGTGAAAGCCT  
TCGGCTTAACCGAAGTAGTGCATTGAAACTGGAAGACTTGTAGTGCAGAAGAGGAGAGTGGAACTCCATGTGTAGCGGTG  
AAATGCTTAGATATCACGAAGAACCAGTGGCGAAGGCGGCTTCTGGCTCATAACTGACGCTGATGCTCGAAAGTGTG  
GGTAT  
>ASV:4428:Family:Lachnospiraceae  
TACGTAGGGGGCAAGCGTTATCCGGATTTACTGGGTGTAAGGGAGCGTAGACGGTTTTGCAAGTCTGAAGTGAAGGCC  
GGGGCTTAACCCGGGACTGCTTTGAAACTGTAGAGCTAGAGTGTGGAGAGGCAAGCGGAATTCCTAGTGTAGCGGTG  
AAATGCGTAGATATTAGGAAGAACCAGTGGCGAAGGCGGCTCACTGGACTGCAACTGACACTGATGCTCGAAAGTGTG  
GGTAT  
>ASV:4429:Genus:Sporobacter  
TACGTAGGTGGCAAGCGTTGTCCGGATTTACTGGGTGTAAGGGCGCGTAGGTGGGTAAAGCAAGTCAGATGTGAAATACC  
GGGGCTTAACCTCGGGCTGCATTTGAAACTGTTTACTTGTAGTATCGGAGAGGCGAGCGGAATTCCTAGTGTAGCGGTA  
AAATGCATAGATATTAGGAGGAACACCAGTGGCGAAGGCGGCTGCTGGACGACAACGACACTGAGGCGCAAAGCGTG  
GGGAG  
>ASV:4430:Genus:Ruminococcaceae\_UCG-010  
TACGTAGGTGGCAGCGTTATCCGGAATTATTGGGTGTAAGGGTGCCTAGGCGGGGAGTAAAGTCAGATGTGAAAGGCG  
TGTGCTCAACATACGGATTGCATTTGAAACTACTTTCTTGTAGTGAAGTAGAGGCAAGCGGAATTCCTAGTGTAGCGGTG  
AAATGCGTAGATATTGGGAGGAACACCAGTGGCGAAGGCGGCTTCTGGGCTTTTACTGACGCTGAGGCACGAAAGTGTG  
GGGAG  
>ASV:4431:Genus:Family\_XIII\_AD3011\_group  
TACGTAGGTGGCAAGCGTTGTCCGGAATTATTGGGCGTAAAGAGTACGTAGGTGGTTTTCTAAGCACGGGGTTAAAGGCA  
ATGGCTTAACCATTTGTCGCTTGTGAACTGGAAGACTTGTAGTGCAGGAGAGGAAAGCGGAATTCCTAGTGTAGCGGTG  
AAATGCGTAGATATTAGGAGGAACACCAGTGGCGAAGGCGGCTACTGGGCACCAACTGACGCTGAGGCTCGAAAGCATGG  
GTAGC  
>ASV:4432:Family:Bifidobacteriaceae  
AACGTAGGGTGAAGCGTTGTCCGGAATTACTGGGTGTAAGGGAGCGCAGGCGGAAGGCTAAGTCTGATGTGAAAGCCC  
GGGGCTCAACCCGGTACTGCATTTGAAACTGGTCACTAGAGTGTCCGAGGGGTAAGTGGAAATTCCTAGTGTAAAGCGTG  
GAATGTGTAGATATCGGAAGAACCACCAATGGCGAAGGCGGCTCTGGGCCGTTACTGACGCTGAGGAGCGAAAGCGTG  
GGGAG  
>ASV:4433:Family:Lachnospiraceae  
TATGTAGGGGGCAAGCGTTATCCGGATTTACTGGGTGTAAGGGAGCGTAGACGGCATGGCAAGTCTGAAGTGAAGGCC  
AGGGCTCAACCTGGGACTGCTTTGAAACTGTCAAGCTAGAGTGCAGGAGAGGTAAGTGGAAATTCCTAGTGTAGCGGTG  
AAATGCATAGATATCACGAGAACCACCGATTGCGAAGGCGAGCTGCTAGGGTGAACAGACGCTGAGGCACGAAAGCGTG  
GGTAT  
>ASV:4434:Family:Lachnospiraceae  
TACGTATGGTGAAGCGTTATCCGGATTTACTGGGTGTAAGGGAGCGCAGGCGGAAGGCTAAGTCTGATGTGAAAGCCC  
GGGGCTCAACCCGGTACTGCTTTGAAACTGTAGAACTAGAGTGCAGAAGAGGTAAGTGGAAATTCCTAGTGTAGCGGTG  
AAATGCGTAGATACTAGGAGGAACACCAGTGGCGAAGGCGGCTACTGGGCACCAACTGACGCTGAGGCTCGAAAGTGTG  
GGTAG  
>ASV:4435:Genus:Pseudoflavonifactor  
AACGTAGGTCAACAGCGTTATCCGGATTTACTGGGTGTAAGGGCGGTGTAGGCGGGACTGCAAGTCAAGTGTGAAACCA  
TGGGCTCAACCTGTGGCCTGCATTTGAAACTGTAGTCTTGTAGTACTGGAGAGGCGAGCGGAATTCCTAGTGTAGCGGTG  
AAATGCGTAGATATCACGAAGAACCAGTGGCGAAGGCGGCTTCTGGACTGTAACGACGCTGATGCTCGAAAGTGTG  
GGTAT  
>ASV:4436:Family:Lachnospiraceae  
TCCTTCTTTTTCCCTCTTTCTCTTCTTTCCCGGGTGTAAAGGGAGCGTAGACGGCAAGGCAAGTCTGATGTGAAACCC  
AGGGCTTAACCTGGGACTGCATTTGAAACTGTACTACTTGTAGTGCAGGAGGGTAAGCGGAATTCCTAGTGTAGCGGTG  
AAATGCGTAGATATTAGGAGGAACACCAGTGGCGAAGGCGGCTTACTGGACGATAACTGACGCTGAGGCTCGAAAGCGTG  
GGGAG





AAATGCGTAGATATCGGGAGGAACACCAGTGGCGAAGGCGGTTTACTGGACCATTACCGACGCTGAGACACGAAAGCGTG  
GGGAG  
>ASV:4451:Genus:Alistipes  
TACGGAGGATCCAAGCGTTATCCGGATTTATTGGGTTTAAAGGGTGCCTAGGCGGTTTGATAAGTTAGAGGTGAAATACC  
GGTGCTTAACACCGGAAGTGCCTCTAATACTGTTGAACTAGAGAGTAGTTGCGGTAGCGGAATGTATGGTGTAGCGGTG  
AAATGCGTAGATATCATGAAGAACTCCGATCGCGAAGGCAGGCATCCGGGTGCAACTGACGCTGAGGCTCGAAAGTGCG  
GGTAT  
>ASV:4452:Genus:Fournierella  
AACGTAGGTGGCAAGCGTTGTCCGGAATTACTGGGTGTAAGGGAGCGCAGGCGGAAGGACAAGTTGGAAGTAAAACCCA  
CGGGCTCAACTCGTGAAGTGCCTTCAAAGTGTCTTTCTTGAGTGGTGTAGAGGTAGGCGGAATCCCGGTGTAGCGGTG  
GAATGCGTAGATATCGGGAGGAACACCAGTGGCGAAGGCGGTTTACTGGACCATTACTGACGCTGAGACACGAAAGCGTG  
GGGAG  
>ASV:4453:Kingdom:Bacteria  
TACGTAGGGGGCAAGCGTTATCCGGATTTACTGGGTGTAAGGGAGCGTAGACGGTGTGCAAGTCTGATGTGGAAGGCA  
TGGGCTCAACTGTGGACTGCATTGAAAAGTGCATACCTTGAGTGCCGGAGGGTAAGCGGAATCCTAGTGTAGAGGTG  
AAATTCGTAGATATTTGTAGGAATGCCGATGGGAAGCCAGCCTACTGGACAGATACTGACGCTAAAGCGCGAAAGCGTG  
GGTAG  
>ASV:4454:Order:Clostridiales  
AACGTAGGTCACAAGCGTTGTCCGGAATTACTGGGTGTAAGGGAGCGCAGGCGGGAGAACAAAGTTGGAAGTAAAATCCA  
TGGGCTCAACTCGGACTGCCTTTGAAAGTGCAGACTAGAGTGCAGGAGAGGTAAGCGGAATCCTAGTGTAGCGGTG  
AAATGCGTAGATATTTAGGAGGAACACCAGTGGCGAAGGCGGCTACTGGGCACCAACTGACGCTGAGGCTCGAAAGTGTG  
GGTAG  
>ASV:4455:Family:Fusobacteriaceae  
TACGTATGTCGCAAGCGTTATCCGGATTTATTGGGCGTAAAGCGCGTCTAGGCGGCTTAGTAAGTCTGATGTGAAAATGC  
GGGGCTCAACCCCGTATTGCGTTGGAAGTGCATAACTAGAGTACTGGAGAGGTAGGCGGAAGTACAAGTGTAGAGGTGA  
AATGCGTAGATATTAGGAGGAACACCAGTGGCGGAGGCGGCTTTCTGGACGATGACTGACGTTGAGGCTCGAAAGCGTG  
GGAGC  
>ASV:4456:Genus:Salinimicrobium  
TACGGAGGATCCAAGCGTTATCCGGAATCATTGGGTTTAAAGGGTCCGTAGGCGGTTAATAAGTCAAGTGGTAAAAGTCT  
GCAGCTCAACTGTAGAAATGCCATTGATACTGTTAACTTGGAGTAAATATGAAGTGGTTAGAATATGTAGTGTAGCGGTG  
AAATGCATAGATATTACATAGAATACCGATTGCGAAGGCAGATCACTAATAATTTACTGACGCTGATGGACGAAAGCGTA  
GGTAG  
>ASV:4457:Genus:Rhodobacter  
TACGGAGGGGGCTAGCGTTGTCCGGAATTACTGGGCGTAAAGCGCACGTAGGCGGACTGGAAGTCAAGGTGAAATCCC  
AGGGCTCAACCTTGGAACTGCCTTTGAAAGTCCCGGCTTGGAGTGCAGAGAGGTGAGTGGAAATCCGAGTGTAGAGGTG  
AAATTCGTAGATATTCGAGGAACACCAGTGGCGAAGGCGGCTACTGGCTCGATACTGACGCTGAGGTGCGAAAGCGTG  
GGGAG  
>ASV:4458:Family:Lachnospiraceae  
TACGTATGGTGAAGCGTTATCCGGATTTACTGGGTGTAAGGGAGCGTAGACGGCATGGCAAGCCAGATGTGAAAGCCC  
GGGGCTCAACCCCGGACTGCATTTGAAAGTGCAGGCTAGAGTGTGCGAGAGGAAAGCGGAATCCATGTGTAGCGGTG  
AAATGCGTAGATATATGGAGGAACACCAGTGGCGAAGGCGACGATCTGGCTGCAACTGACGCTCAGTCCGAAAGCGTG  
GGTAG  
>ASV:4459:Genus:Bacteroides  
TACGGAGGATCCGAGCGTTATCCGGATTTATTGGGTTTAAAGGGAGCGTAGATGGATGTTTAAAGTCAAGTGTGAAAAGTTT  
GCGGCTCAACCGTAAATTTGAGTTGATACTGGATATCTTGAGTGCAGTTGAGGCGAGGCGGAATTCGTGGTGTAGCGGTG  
AAATGCGTAGATATCACGAAGAAGTCCGATTGCGAAGGCAGCCTGCTAAGTGCACCTGACATTGAGGCTCGAAAGTGTG  
GGTAT  
>ASV:4460:Phylum:Firmicutes  
TACGGAGGATCCGAGCGTTATCCGGAATTATTGGGCGTAAAGAGCGCGCAGGTGGTTGATTAAGTCTGATGTGAAAGCCC  
ACGGCTTAAACCGTGGAGGGTATTGGAAGTGGTGCAGTTCAGTGCAGAAAGAGGGAAGTGGAAATCCTAGTGTAGCGGTG  
AAATGCTTAGATATCACGAAGAAGTCCGATTGCGAAGGCAGCTCACTGGAGTGAACGACGCTGATGCTCGAAAGTGTG  
GGTAT  
>ASV:4461:Order:Bacteroidales  
TACGGAGGATCCGAGCGTTATCCGGATTTATTGGGTTTAAAGGGTGCCTAGGCGGGATCGCAAGTCAAGTGTGAAAAGTCA  
TGGGCTTAAACCATAACTGCATTTGAAAGTGTGGTCTTGAGTGAAGTAGAGGTAAGCGGAATCCTAGTGTAGCGGTG  
AAATGCTTAGATATCACGAAGAAGTCCGATTGCGAAGGCAGCCTGCTAAGTGCACCTGACATTGAGGCTCGAAAGTGTG  
GGTAT  
>ASV:4462:Kingdom:Bacteria  
TACGTATGGTGAAGCGTTATCCGGATTTATTGGGCGTAAAGCGAGCGCAGGTGGTTTATTAAGTCTGGTGTAAAAGGCA  
GTGGCTCAACCATTTGATGCATTGGAAGTGGTAGACTTGAGTACAGTAGAGGCAGGCGGAATTCGTGGTGTAGCGGTGA  
AATGCTTAGATATCACGAAGAAGTCCGATTGCGAAGGCAGCTCACTAGACTGCTACTGACACTGATGCTCGAAAGTGTG  
GTATC  
>ASV:4463:Family:Ruminococcaceae  
TACGTAGGTGGCAAGCGTTGTCCGGAATTATTGGGCGTAAAGGGAGCGCAGGCGGGAAGACAAGTTGGAAGTAAAATCCA  
TGGGCTCAACCCATGAAGTGCCTTCAAAGTGTCTTTCTTGAGTAGTGCAGAGGTAGGCGGAATCCCGGTGTAGCGGTG  
AAATGCGTAGAGATTAGGAAGAACACCAGTGGCGAAGGCGACTTTCTGGACGAAAAGTGCAGCTGAGGCGCGAAAGCGTG  
GGGAG  
>ASV:4464:Genus:Corynebacterium

TACGTAGGGTGCAGCGTTGTCCGGAATTACTGGGCGTAAAGAGCTCGTAGGTGGTTTGTTCGCTCGTCTGTGAAATCC  
GGGGCTTAACCTCGGGTGGCAGGCGATACGGGCATAACTAGAGTGTGTAGGGGAGACTGGAATTCCTGGTGTAGCGGT  
GGAATGCGCAGATATCAGGAGGAACACCGATGGCGTAGGCAGGTCTCTGGGCAGTAACTGACGCTGAGGAGCGAAAGCAT  
GGGA

>ASV:4465:Species:wenyonii

AACATAGGTACGAGCATTATCCGGATTTATTGGGCGTAAAGGAAGCGTAGGTGGGGAGGTTGATCCATTGTTAAAGGCA  
TTTGCTTAACAAATGTGTGCGATGGAGATCGCTCCCTAGAGTTAATCAGGGGGTACTGGAATTCATGTGTAGCGGTGG  
AATGCGTAGATATATTGAGGAACACCAGAGGCTAAGGCGAGTGCCTAGGATATAACTGACACTGAGGCTTAAAAGCGTGG  
GGAG

>ASV:4466:Species:parvulum

TACGTAGGGGGCAAGCGTTATCCGGATTCATTGGGCGTAAAGCGCTCGTAGGCGGTCTGTTAGGTGGGAGTTAAATCCG  
GGGGCTCAACCCCGCTCGCTCTCGATACGGCAGACTTGAGTTTGGTAGGGGAAGGTGGAATTCCTAGTGTAGCGGTGG  
AATGCGCAGATATTAGGAAGAACACCAGTGGCGAAGCGGCCCTCTGGGCCATAACTGACGCTGAGGAGCGAAAAGCTAGG  
GGAG

>ASV:4467:Genus:Leptotrichia

TACGTATGTCGCGAGCGTTATCCGGAATTATTGGGCGTAAAGGGCATCTAGGCGGATATACAAGTCAGGGGTGAAAACCT  
AGGGCTCAACTCAAAGCTTGCCTTTGAAACTGTATATCTAGAGTGTGGAGAGGTGGACGGAACACACGAGTAGAGGTG  
AAATTCGTAGATATGTGTAGGAATGCCGATGATGAAGATAGTCCACTGGACAGCAACTGACGCTGAAGTGCAAAAGCTAG  
GGAG

>ASV:4468:Genus:Fusobacterium

TACGTATGTACAAGCGTTATCCGGATTTATTGGGCGTAAAGCGCTCGTAGGTGGTTATGTAAGTCTGATGTGAAAATGC  
AGGGCTCAACTCTGTATTGCGTTGGAAACTATGTAAGTAGAGTACTGGAGAGGTAAGCGGAACACAAAGTGTAGAGGTGA  
AATTCGTAGATATTTGTAGGAATGCCGATGGGGAAGCGCCTTACTGGCCATAACTGACGCTGAAGCGCGAAAAGCGTGG  
GTAGC

>ASV:4469:Genus:Neisseria

TACGGAGGGTCAAGCGTTAATCCGGAATTACTGGGCGTAAAGCGGGCGCAGACGGTACTTAAGCAGGATGTGAAATCCC  
CGGGCTCAACTCGGAACTGCGTTCTGAAGTGGGTGACTAGAGTGTGTCAGAGGGAGGTAGAATTCACGCTGTAGCAGTG  
AAATGCGTAGAGATGTTGAGGAATACCGATGGCGAAGGCGCCTCTGGGATAACACTGACGTTCCATGCCCGAAAAGCGTG  
GGTAG

>ASV:4470:Genus:Ruminiclostridium\_5

TACGTAGGGAGCAAGCGTTGTCCGGATTTACTGGGTGTAAGAGTGCCTAGGCGGATTGGCAAGTCAGAAGTGAATCCA  
TGGGCTTAACCCATGAAGTCTTTTGAAGTGTAGTCTTGAAGTGAAGTAGAGGTAGGCGGAATTCCTGGTGTAGCGGTG  
AAATGCGTAGAGATCGGGAGGAACACCAGTGGCGAAGGCGGCTTACTGGACGGTAACTGACGTTGAGGCTCGAAAAGCGTG  
GGGAG

>ASV:4471:Genus:Acidaminococcus

TACGGAGGATGCGAGCGTTATCCGGATTTATTGGGTTTAAAGGGTGCCTAGGCGGGCTTTTAAAGTCCGACGTGAAAATGC  
GGGGCTTAACCCGATGAGTGGGTTGGTACTGGAAGTCTTGAAGTGCAGGAGAGGAAAGGGGAATTCACGCTGTAGCGGTGA  
AATGCGTAGATATTGGGAGGAACACCAGTGGCGAAGGCGCCTGCTGGGCTTTAACTGACGCTGAGGCACGAAAAGCGTGG  
TAGCA

>ASV:4472:Order:Bacteroidales

TACGGAGGATCCGGCGTTATCCGGATTTATTGGGTTTAAAGGGAGCGTAGGCGGACTATTAAGTCAGCTGTGAAAAGTTT  
GCGGCTTAACCCGATAAATTGCAAGTTGATACTGGTCTTGGTGCAGTAGAGGTAGGCGGAATTCACGCTGTAGCAGTG  
AAATGCGTAGATATGTGGAAGAACCAGTGGCGAAGGCGCCTCTGGGACATAACTGACGCTCAGGCACGAAAAGCGTG  
GGGAG

>ASV:4473:Family:Veillonellaceae

TACGTAGGGAGCAAGCGTTGTCCGGATTTACTGGGTGTAAGGGTGCCTAGGCGGCTTCCCAAGTCCCTCTTAAAAGTGC  
GGGGCTTAACCCGATGAGTGGGAAAGGAAACTGGGAAGCTGGAGTATCGGAGAGGAAAGTGAATTCCTAGTGTAGCGGTGA  
AATGCGTTGAGATGGGAGGAACACCAGTGGCGAAGGCGCCTGCTGGGCTTTAACTGACGCTGAGGCACGAAAAGCGTGG  
GTAGC

>ASV:4474:Genus:Kandleria

TACGTAGGTGCAAGCGTTGTCCGGAATTATTGGGTTTAAAGGGAGCGTAGACGGCTGTGTAAGTCTGAAGTGAAGGCC  
GGGGCTCAACCCGGGACTGCTTTGGAAACCAGGCGGCTAGAGTGCAGGAAAGGATCGTGAATTCATGTGTAGCGGTG  
AAATGCGTAGATATATTGAGGAACACCAGTGGCGAAGGCGCCTCTGGGCCCAACTGACGCTCATTCCGAAAAGCGTG  
GGGAG

>ASV:4475:Family:Ruminococcaceae

TACGTAGGGAGCAAGCGTTGTCCGGATTTACTGGGTGTAAGGGTGCCTAGGCGGCTTGGCAAGTCCGGCGTAAAAGCTA  
TGGGCTTAACCCATAAATTGCGTTTCAAACCTGTTGAGCTTGAAGTGAAGTAGAGGTAGGCGGAATTCCTGGTGTAGCGGTG  
AAATGCGTAGAGATCGGGAGGAACACCAGTGGCGAAGGCGCCTACTGGGCTTTAACTGACGCTGAGGCACGAAAAGTGTG  
GGTAG

>ASV:4476:Genus:Hydrogenoanaerobacterium

TACGTAGGGAGCGAGCGTTGTCCGGAATTACTGGGTGTAAGGGAGCGTAGGCGGGAGTGAAGTTGAATGTTTAACTA  
TGGGCTCAACCCATATCAGCGTTCAAACCTGCATTTCTTGAAGTGAAGTAGAGGTGGCGGAATTCCTAGTGTAGCGGTG  
AATGCGTAGATATTAGGAGGAACACCAGTGGCGAAGGCGGATTGCTGGACAGCAACTGACGGTGAAGCGCGAAAAGTGTG  
GGAG

>ASV:4477:Genus:Oscillibacter

TACGTAGGTGGCAAGCGTTGTCCGGATTTACTGGGTGTAAGGGCGTGCAGCCGGGCTGGCAAGTCAAGCGTGAATCC  
AGGGCTCAACCCGAACTGCGTTTGAACCTGCTGGTCTTGAAGTACCAGGAGAGGTGATCGGAATTCCTTGTGTAGCGGTG  
AAATGCGTAGATATAAGGAAGAACCAGTGGCGAAGGCGGATGACTGGACGGCAACTGACGGTGAAGCGCGAAAAGCCAG

GGGAG  
>ASV:4478:Kingdom:Bacteria  
TACGTAGGGTGC AAGCGTTAATCGGAATTACTGGGCGTAAAGCGTGC G CAGGTGGTTCTGTAAGATAGATGTGAAATCCC  
CAGGCTCAACCCGGGAAGTGC TTTGGAACTGTTGGGCTGGAGTGC TGGAGAGGCAGCGGAATTCCTAGTGTAGCGGTG  
AAATGCGTAGATATTAGGAGGAACACCAGTGGCGAAGGCGGCTGCTGGACTGTTACTGACACTGAGGCACGAAAGCGTG  
GGGAG  
>ASV:4479:Family:Ruminococcaceae  
TACGTAGGGGCAAGCGTTATCCGGATTACTGGGTGTAAGGGTGC GTAGCGGCTAGACAAGTCAGGTGTGAAATACC  
GCAGCTCAACTGCGGGGCTGCACTTGAAGCTGTAGAGCTT GAGTGATGGAGAGGTAAGCGGAATTCCTAGTGTAGCGGTA  
AAATGCGTAGATATTAGGAGGAACACCAGTGGCGAAGGCGGCTTACTGGACATTAAGTACGCTGAGGCACGAAAGCGTG  
GGGAG  
>ASV:4480:Family:Muribaculaceae  
TACGGAGGATGCGAGCGTTATCCGGATTTACTGGGTGTAAGGGTGC G CAGGCGGAGGCACAAGTCAGCGGTAAAATCGC  
GGGGCTCAACCCCGCTCCGCCGTTGAAACTGTGTCCCTT GAGTGC GCGAAGGGTAGGCGGAATGCGTGGTGTAGCGGTGA  
AATGCATAGATATCACGAGAAGTCCGATCGGAAGGCGAGCCTACCGGCGCGCAACTGACGCTCATGCACGAAAGCGTGG  
GTATC  
>ASV:4481:Genus:Ruminiclostridium\_5  
TACGTAGGGAGCGAGCGTTGTCCGGATTTACTGGGTGTAAGGGTGC GTAGCGGATTGGCAAGTCAGTAGTAAAATCCA  
TGGGCTTAACCCATGACGTGCTATTGAAACTGTTGATCTT GAGTGAAGTAGAGGTAAGCGGAATTCCTAGTGTAGCGGTG  
AAATGCGTAGAGATCGGGAGGAACACCAGTGGCGAAGGCGGCTTACTGGGCTTAACTGACGCTGAGGCACGAAAGCATG  
GGTAG  
>ASV:4482:Genus:Eisenbergiella  
TACGTAGGGGCAAGCGTTATCCGGATTTACTGGGTGTAAGGGAGCGT AGACGGCATGGCAAGCCAGATGTGAAAACCC  
AGGGCTCAACCTTGGGATTGCATTTGAAACTGCCAGGCTGGAGTGCAGGAGAGGTAAGCGGAATTCCTAGTGTAGCGGTG  
AAATGCGTAGATATTAGGAGGAACACCAGTGGCGAAGGCGGCTACTGGGCACCAACTGACGCTGAGGCTCGAAAGCATG  
GGTAG  
>ASV:4483:Order:Bacteroidales  
TACGTATGGGGCAAGCGTTATCCGGATTTACTGGGTGTAAGGGAGCGT AGGCGCATGGCAAGTCAGAAGTAAAAGCCT  
GGGGCTCAACCCGGAATTGCTTTTGAAGTGGCAGTCTT GAGTACAGTAGAGGTGGCGGAATTCGTGGTGTAGCGGTG  
AAATGCTTAGATATCACGAAGAAGTCCGATTGCGAAGGCGAGCTT GCTGGACTGTAAGTACGCTGATGCTCGAAAGTGTG  
GGTAT  
>ASV:4484:Family:Ruminococcaceae  
AACGTAGGTCAACAAGCGTTGTCCGGATTTACTGGGTGTAAGGGCGTGTAGCCGGGAAGGCAAGTCAGATGTGAAATCCA  
CGGGCTCAACTCGTGAAGTGCATTTGAAACTGTTTTTCTT GAGTATCGGAGAGGCAATCGGAATTCCTAGTGTAGCGGTG  
AAATGCGTAGAGATCTGGAGGAATACCGGTGGCGAAGGCGGCCCTTGACGAAAGTACGCTCAGGTGCGAAAGCGTG  
GGGAG  
>ASV:4485:Family:Ruminococcaceae  
TACGTAGGGAGCAAGCGTTGTCCGGATTTACTGGGTGTAAGGGTGC GTAGGCGGAAGTCAAGTCAGTGGTAAAATCTG  
AGGGCTCAACCTCAAAGTGCATTGAAACTGTGGTTCTT GAGTGAAGTAGAGGTAGGCGGAATTCCTAGTGTAGCGGTG  
GAATGCGTAGAGATCGGGAGGAACACCAGTGGCGGAGGCGGCTACTGGGCACCAACTGACGCTGAGGCTCGAAAGTGTG  
GGTAG  
>ASV:4486:Kingdom:Bacteria  
TACGTATGGTGAAGCGTTATCCGGATTTACTGGGTGTAAGGGAGCGCAGGCGGGAAGACAAGTTGGAAGTAAAACCA  
TGGGCTCAACCATAAAGTGC TTTCAAAGTGTTTTTCTT GAGTAGTGCAGAGGGAGGTGGAATTCACGCTGTAGCAGTG  
AAATGCGTAGATATGTGGAAGAACACCAGTGGCGAAGGCGAGCCTCTGGGACATAACTGACGCTGAGGCTCGAAAGCGTG  
GGGAG  
>ASV:4487:Family:Lachnospiraceae  
TACGTATGGTGAAGCGTTATCCGGATTTACTGGGTGTAAGGGAGCGT AGGCGTAAGACAAGTCAGAAGTAAAAGGCT  
GGGGCTCAACCTGGGACTGCTTTTGAAGTGTCTAACTAGAGTGCAGGAGAGGTAAGTGAATTCCTAGTGTAGCGGTG  
AAATGCGTAGATATTAGGAGGAACACCAGTGGCGAAGGCGGATTGCTGGACGACAAGTACGCTGAGGCGCGAAAGCGTG  
GGGAG  
>ASV:4488:Family:Streptococcaceae  
TACGTAGGTCCCAGCGTTGTCCGGATTTATTGGGCGTAAAGCGAGCGCAGGCGGTTTGATAAGTCTGAAGTAAAAGGCT  
GTGGCTCAACCATAGTTCGCTTTGAAAGTGTCAAAGTTCGAGTGCAGAGGGGAGAGTGAATTCATGTGTAGCGGTGA  
AATGCATAGATATCACGAGAAGTCCGATTGCGAAGGCGAGCTTACTAGACCATAACTGACACTGAAGCACGAAAGCGTGG  
GGATC  
>ASV:4489:Family:Puniceicoccaceae  
TACGGAGACTACGAGCGTTACTCGGATTTACTGGGCGTAAAGGGAGCGCAGGCGGAATGGTGTGTTAGGTGTGAAATCTC  
GGAGCTTAACCTCGAAATTGCGCTAAAAGTATTATTTCTAGAGTGC TGGAGAGGTAAGCGGAATTCCTAGTGTAGCGGTG  
AAATGCGTAGATATCGGAAGGAACACCAGGCGAAGGCGAGCTTACTGGACGAAAGTACGCTCATGCTCGAAAGCGTG  
GGGAG  
>ASV:4490:Family:Lachnospiraceae  
TACGGAGGGTGAAGCGTTATCCGGATTTACTGGGTGTAAGGGAGCGT AGACGGATTGCAAGTCTGATGTGAAAGGCA  
GGGGCTCAACCTTGGACTGCATTGAAAGTGCAGCTT GAGTGCCGGAGAGGTAAGCGGAATTCCTAGTGTAGCGGTG  
AAATGCTTAGATATGACGAAGAAGTCCGATTGCGAAGGCGAGCCTGCTGTAGCGTAACTGACGCTGAAGTCTCGAAAGCGTG  
GGTAT  
>ASV:4491:Family:vadinBE97  
TACGTAGGTGGCGAGCGTTGTCCGGATTTATTGGGCGTAAAGGGTCCGAGGGGTTGATTAAGTCTGACGTGAAATCCC

TGAGCTTAACTCAGGAAGTGCCTGGAGACTGGTTGACTAGAGTATTGGAGAGGTGATTGGAATCCAGGTGTAGCGGTG  
GAATGCGTAGATATCTGGAAGAACATCGAAAGCGAAGGCAGATCACTGGACAATGACTGACCCTCAGGGACGAAAGCATG  
GGGAG  
>ASV:4492:Order:Bacteroidales  
TACGGAGGATGCGAGCGTTATCCGGATTTATTGGGTTTAAAGGGTGCCTAGGTGCGCGATTAAGTCAGCGGTGAAATCCA  
GTGGCTCAACCATCGGACTGCCGTTGAAACTGGCCGCTTAGATGATTGAGGCAGCGGAATGCGTGGTGTAGCGGTG  
AAATGCATAGATATCTGGAAGAACACCAAGGCGAAGGCAGTCTCTGGGCAAACTGACGCTCATATGCGAAAGCGTG  
GGTAG  
>ASV:4493:Genus:Barnesiella  
TACGGAGGATGCAAGCGTTATCCGGATTTATTGGGTTTAAAGGGTGCCTAGGCGGCACGCCAAGTCAGCGGTGAAATTC  
CGGGCTCAACCCGACTGTGCCGTTGAAACTGGCCGCTTAGAGTGACAAGAGGCAGCGGAATGCGTGGTGTAGCGGTG  
AAATGCATAGAGATGTGGAGGAATACCGGTGGCGAAGGCGGCCCTGGACGAAGACTGACGCTCAGGTGCGAAAGCGTG  
GGGAG  
>ASV:4494:Genus:Lachnospiraceae\_UCG-010  
TACGGAGGGGCAAGCGTTATCCGGAATTACTGGGTGTAAGGGGAGCGTAGGCGGCACGCCAAGCCAGATGTGAAAGCCC  
GAGGCTTAACTCGCGGATTGCATTTGAAACTGGCCGCTTAGAGTACAGGAGAGGAAAGCGGAATTCCTAGTGTAGCGGT  
GAAATGCGTAGATATCTGGAAGAACACCAAGGCGAAGGCAGTCTCTGGGCAAACTGACGCTCATATGCGAAAGCGTG  
GGGGA  
>ASV:4495:Genus:Lachnospira  
TACGTATGGAGCAAGCGTTATCCGGATTTACTGGGTGTAAGGGGAGTGTAGGTGGCCAGGCAAGTCAGAAGTAAAGCCC  
GGGGCTCAACCTCGGACTGCTTTTAAACTGCAGGGCTAGAGTGACAGGAGGGCAAGTGAATTCCTAGTGTAGCGGTG  
AAATGCGTAGATATGACGAAGAATCCGATTGCGAAGGCAGCTGCTGTAGCGTAACTGACGCTGAAGTCTGAAAGCGTG  
GGTAT  
>ASV:4496:Genus:Parabacteroides  
AACGTAGGGTGCAGCGTTATCCGGATTTATTGGGTTTAAAGGGTGCCTAGGTGGTGTAAAGTCAGCGGTGAAAGTTT  
GTGGCTCAACCATAAAATTGCCGTTGAAACTGGGTTACTTGTAGTGTGTTGAGGTAGGCGGAATGCGTGGTGTAGCGGTG  
AAATGCATAGATATCGGAGGAACACCAAGTGGCGAAGGCGGCTACTGGGCACCAACTGACGCTGAGGCTCGAGAGTGTG  
GGTAG  
>ASV:4497:Genus:Ruminococcaceae\_UCG-013  
TACGTAGGTGGCAGCGTTGTCCGGAATTACTGGGTGTAAGGGGCGAGTAGGCGGCACATACAAGTCAGAAGTAAATCTA  
GGGGCTCAACCCCTAAACTGCTTTTAAACTGTATGCCTTAGTGCAGGAGAGGAAAGCGGAATTCCTAGTGTAGCGGTG  
AAATGCGTAGATATTAGGAGGAACACCAAGTGGCGAAGGCGGCTTTCTGGACGGTAACTGACGCTGAGGCGCGAAAGCGTG  
GGGAG  
>ASV:4498:Genus:Prevotella\_2  
TACGTATGGTGCAGCGTTATCCGGATTTACTGGGTGTAAGGGGAGCGTAGACGGAGTGGAAGTCTGATGTGAAATGTC  
GGGGCTCAACCTGGGCATTGACGCGCAACTGGCAGACTTGTAGTGCAGGAAGTAGGCGGAATTCGTCGTGTAGCGGTG  
AAATGCTTAGATATGACGAAGAATCCGATTGCGAAGGCAGCTGACGGGTGCTAACTGACGCTCATGCTCGAAAGTGCG  
GGTAT  
>ASV:4499:Genus:Butyricimonas  
TACGTAGGGAGCGAGCGTTATCCGGATTTACTGGGTGTAAGGGGCGCTAGGCGGGCAGGCAAGTCAGCGGTAAAAGACT  
GCAGCTAAACTGTAGCACCGGTTGAAACTGTGCACCTGGAGACGAGACGAGGGAGGCGGAACAAGTGAAGTAGCGGTGA  
AATGCATAGATATCACTTGGAAACCCGATAGCGAAGGCAGCTTACTGGAGTGTAACTGACGCTGAAGCTCGAAAGCGCG  
GTATC  
>ASV:4500:Genus:Ruminococcaceae\_UCG-003  
AACGTAGGTGGCAAGCGTTGTCCGGATTTACTGGGTGTAAGGGGCGTGCAGCCGGTGCAGCAAGTCAGATGTGAAATCTC  
AGGGCTCAACCTGAAACTGCATTTGAAACTGTGCATCTTGTAGTGCAGGAGAGGTAATCGGAATTCCTGTGTAGCGGTG  
AAATGCGTAGATATAAGGAAGAACACCAAGTGGCGAAGGCGGATGACTGGACGCAACTGACGCTGAAGCTCGAAAGTGCG  
GGTAT  
>ASV:4501:Genus:Oscillospira  
TACGTAGGTGGCAAGCGTTGTCCGGATTTACTGGGTGTAAGGGGCGTGTAGCCGGTGTGTAAGTCAGATGTGAAATCTG  
GAGGCTCAACCTCAAACCTGCATTTGAAACTGCGCATCTTGTAGTATCGGAGAGGTATCGGAATTCCTAGTGTAGCGGTG  
AAATGCGTAGATATTAGGAAGAACACCAAGTGGCGAAGGCGGATGACTGGACGCAACTGACGCTGAGGCGCGAAAGCGTG  
GGGAG  
>ASV:4502:Genus:Delftia  
TACGTAGGGTGCAGCGTTAATCGGAATTACTGGGCGTAAAGCGTGCAGGCGGTTATGTAAGACAGATGTGAAATCCC  
GGGGCTCAACCTGGGAACTGCATTTGTACTGCATGGCTAGAGTACGGTAGAGGGGGATGGAATTCGCGGTGTAGCAGTG  
AAATGCGTAGATATGCGGAGGAACACCAAGTGGCGAAGGCAATCCCCTGGACCTGTACTGACGCTCATGACGAAAGCGTG  
GGGAG  
>ASV:4503:Genus:Paraprevotella  
TACGGAAGATGCGAGCGTTATCCGGATTTATTGGGTTTAAAGGGGAGCGTAGGCGGGCTTTTAAAGTCAGCGGTCAAATGTG  
GTGGCTCAACCATGTCAAGCGTTGAAACTGTAGGCTTAGGCTCTGACAGGGCACATGGAATTCGTTGGTGTAGCGGTGA  
AATGCTTAGATATCGGGAAGAACACCAATGGCGAAGGCGAGTCTCTGGCCGTTACTGACGCTGAGGAGCGAAAGCGTG  
GGAGC  
>ASV:4504:Family:Enterobacteriaceae  
TACGGAGGATCCGAGCGTTATCCGGATTTATTGGGTGTAAGGGGAGCGCAGGCGGTGCGGCAAGTCTGATGTGAAATCCC  
CGGGCTCAACCTGGGAACTGCATCTGATACTGGCAAGCTTGTAGTCTGTAGAGGGGGTGAATTCAGGTGTAGCGGTG  
AAATGCGTAGAGATCTGGAGGAATACCGGTGGCGAAGGCGGCCCTGGACGAAGACTGACGCTCAGGTGCGAAAGCCAG  
GGTAG

>ASV:4505:Genus:CHKCI001  
TACGTAGGGGGCAAGCGTTATCCGGATTTACTGGGTGTAAAGGGAGCGTAGGTGGTAAGGCAAGCCAGAAGTGAAAGCCC  
GGGGCTCAACCCGAGGATTGCTTTTGAAGTGTGCAACTAGAGTGCAGGAGGGGCAAGCGGAATTCCTAGTGTAGCGGT  
GAAATGCGTAGATATTAGGAGGAACACCAGTGGCGAAGGCGGCTTCTGACTGTAAGTACTGACTGAGGCTCGAAAGCGT  
GGGA

>ASV:4506:Genus:Romboutsia  
TACGTAGGGGGCTAGCGTTATCCGGAATTACTGGGCGTAAAGGGTGCCTAGGTGGTTTCTTAAGTCAGAGGTGAAAGGCT  
ACGGCTCAACCGTAGTAAGCCTTTGAAACTGGGAACTTGAGTGCAGGAGAGGAGTGGAAATTCCTAGTGTAGCGGTGA  
AATGCGTAGATATTAGGAGGAACATCAGTTGCGAAGGCGGCTCTGACTGTAAGTACTGACTGAGGACGAAAGCGTGG  
GGAG

>ASV:4507:Genus:Roseburia  
TACGTATGGGGCAAGCGTTATCCGGATTTACTGGGTGTAAAGGGAGCGCAGGCGGCTTGGCAAGTCTGATGTGAAAGGCT  
GGGGCTCAACCCAGGACTGCATTGAAACTGTTAGGCTAGAGTGTGCGAGAGGTAAGCGGAATTCCTAGTGTAGCGGTG  
AATGCGTAGATATTAGGAGGAACACCAGTGGCGAAGGCGGCTTACTGGACGACAAGTACTGACTGAGGCTCGAAAGCGT  
GGAG

>ASV:4508:Genus:Butyricimonas  
TACGGGGGATGCGAGCGTTATCCGGATTTATTGGGTTAAAGGGCGCGTAGGGGGACGCCAAGTCAGCGGTAAAAGACT  
GCAGCTAAACTGTAGCACGCCGTTGAAACTGGCGACCTTGAGACGAGACGAGGAGGCGGAACAAGTGAAGTAGCGGTGA  
AATGCTTAGATATCACGAAGAAGTCCGATTGCGAAGGCGAGCTTCTGACTGTAAGTACTGACTGATGCTCGAAAGTGTGG  
GTATC

>ASV:4509:Genus:Fusicatenibacter  
TACGTAGGGGAGCGAGCGTTGTCCGGAATTACTGGGTGTAAAGGGAGCGTAGACGGCAAGGCAAGTCTGATGTGAAAACCC  
AGGGCTTAACCTGGGACTGCATTGAAACTGTCTGGCTCGAGTGCCGGAGAGGTAAGCGGAATTCCTAGTGCAGCGGTG  
GAATGCGTAGATATCGGAGGAACACCAGTGGCGAAGGCGGCTTACTGGCACCAACTGACGCTGAGGCTCGAAAGTGTG  
GGTAG

>ASV:4510:Genus:Harryflintia  
TACGTAGGTGGCAAGCGTTGTCCGGAATTACTGGGTGTAAAGGGAGCGTAGGGGGAATGCAAGTTGGATGTCTAAACTA  
TCGGCTCAACCCGTAATCGCATTCGAAACTGTATTTCTTGAGTGGAGTAGAGGAGGCGGAATTCCTAGTGTAGCGGTGA  
AATGCGTAGATATTAGGAGGAACACCAGTGGCGAAGGCGGCTGCTGGGCTCTAACTGACTGAGGCTCGAAAGCGTGG  
GTAGC

>ASV:4511:Class:Bacteroidia  
TACGTAGGGGGCAAGCGTTGTCCGGAATTACTGGGTGTAAAGGGAGCGCAGACGGAGAAGCAAGTCAAGTGGTAAAACGAT  
GGGCTTAACCTCATCGACTGCCATTGAAACTGTTTCCCTTGAGTGAAGTAGAGGAGGCGGAATTCCTGTTGTAGCGGTGA  
AATGCTTAGATATCACGAAGAAGTCCGATTGCGAAGGCGAGCTTCTGACTGTAAGTACTGACTGATGCTCGAAAGTGTGG  
GTATC

>ASV:4512:Genus:Dielma  
TACGTAGGGGGCAAGCGTTGTCCGGAATTATTGGGCGTAAAGGGTGCCTAGGCGGGAGATAAGTCTGAGGTAAAAGCCC  
GTGGCTCAACCCAGGTAAGCCTTTGAAACTGTCTGGCTAGAGTGTGCGAGAGGAAAGCGGAATTCCTAGTGTAGCGGTGA  
AATGCGTAGATATTAGGAGGAACACCAGTGGCGAAGGCGGCTTCTGACTGATGACTGACTGAGGCTCGAAAGCGTGG  
GGAGT

>ASV:4513:Family:Lachnospiraceae  
TACGGAGGATCCGAGCGTTATCCGGATTTACTGGGTGTAAAGGGAGCGTAGACGGACTGGCAAGTCTGATGTGAAAGGCG  
GGGGCTCAACCCCTGGACTGCATTGAAACTGTATTTCTTGAGTGTGCGAGAGGTTGACGGAATTCCTAGTGTAGCGGTG  
AATGCGTAGATATTAGGAGGAACACCAGTGGCGAAGGCGGCTCAACTGGACGATAACTGACTGAGGCGGAAAGCGTGG  
GGAG

>ASV:4514:Genus:Romboutsia  
TACGTAGGGGGCTAGCGTTATCCGGAATTACTGGGCGTAAAGGGTGCCTAGGTGGTTTCTTAAGTCAGAGGTGAAAGGCT  
ACGGCTCAACCGTAGTAAGCCTTTGAAACTGGGAACTTGAGTGCAGGAGAGGAGAGTGGAAATTCCTAGTGTAGCGGTGA  
AATGCGTAGATACTAGGAGGAACACCAGTGGCGAAGGCGGCTCTGACTGTAAGTACTGACTGAGGACGAAAGCGTGG  
GGAG

>ASV:4515:Genus:Akkermansia  
TACAGAGGTCTCAAGCGTTGTTCGGAATCACTGGGCGTAAAGCGTGCCTAGGCTGTTTCTGTAAGTCTGTGTGAAAGGCG  
CGGGCTCAACCCGCGGACGGCACATGATACTGCGAGACTAGAGTAATGGAGGGGAAACCGGAATTCCTGTTGTAGCAGTG  
AATGCGTAGACATTAGGAGGAACACCAGTGGCGAAGGCGGCTCACTAGACTGTTACTGACTGATGCTCGAAAGTGTG  
GGTAT

>ASV:4516:Class:Bacteroidia  
TACGTAGGGAGCGAGCGTTGTCCGGAATTACTGGGTGTAAAGGGAGCGTAGGCGGGATGGCAAGTCAAGTGTGAAAAGCTA  
TGGGCTCAACCCATAGACTGCATTTGAAACTGTTGTTCTTGAGTGGAGTAGAGGTAAGCGGAATGCGTGGTGTAGCGGTG  
AATGCATAGATATCACGCAGAAGTCCGATTGCGAAGGCGAGTACTAAACCATAACTGACTGAAGCACGAAAGTGTG  
GGAG

>ASV:4517:Order:Clostridiales  
TACAGAGGTCTCAAGCGTTGTTCGGAATCACTGGGCGTAAAGCGTGCCTAGGCTGTTTCTGTAAGTCTGTGTGAAAGGCT  
GGGGCTCAACCCGGAATGCTTTTGAAGTGTGAGGCTAGAGTGTGCGAGGGGTAAGCGGAATTCCTAGTGTAGCGGTG  
AATGCGTAGATATTAGGAGGAACATCAGTGGCGAAGGCGGCTTACTGGACTGAAACTGACTGAGGACGAAAGCGTGG  
GGAG

>ASV:4518:Genus:Lachnospiraceae\_ND3007\_group  
TACGTAGGGGGCAAGCGTTATCCGGAATTACTGGGTGTAAAGGGAGCGTAGGTGGCAAGGCAAGCCAGAAGTGAAAGCCC  
GGGGCTCAACCCGAGGATTGCTTTTGAAGTGTGATGCTAGAGTGCAGGAGGGGTGAGCGGAATTCCTAGTGTAGCGGTG

AAATGCGTAGATATTAGGAGGAACACCGGAGGCGAAGGCGGCTTACTGGACGATAACTGACGTTGAGGCTCGAAAGCGTG  
GGAG  
>ASV:4519:Genus:Alistipes  
TACGGAGGATCCGAGCGTTATCCGGATTTATTGGGTTTAAAGGGTGCCTAGGCGGTTTGATAAGTTAGAGGTGAAATTC  
GGGGCTAACCCCTGAACGTGCCTCTAATACTGTTGAGCTAGAGAGTAGTTGCGGTAGCGGAATGTATGGTGTAGCGGTG  
AAATGCGTAGATATTAGGAAGAACACCCAGCGGCGAAGGCGGCTTACTGGACAGTAACTGACGTTGAGGCTCGAAAGCGTG  
GGAG  
>ASV:4520:Genus:Pectinatus  
TACGTAGGCGGCAGGCGTTGTCCGGAATTATTGGGCGTAAAGCGCGCGCAGGCGGCTTCTTAAGTCCATCTTAAAAGTGC  
GGGGCTAACCCCGTGTAGGGTCCGAACTGGTTTTCTTGAGTGCAGGAGAGGAAAGCGGAATTCAGTGTAGCGGTGA  
AATGCGTAGATATTGGGAAGAACACCCAGTGGCGAAGGCGGCTTCTGGACTGAAACTGACACTGAGGCACGAAAGCGTG  
GGAGC  
>ASV:4521:Family:Lachnospiraceae  
TACGGAGGATCAAGCGTTATCCGGATTTATTGGGTTTAAAGGGTGCCTAGGCGGTTTGATAAGTTAGAGGTGAAAGGCA  
GGGGCTAACCCCTGGACTGCATTGAAACTGCTGTGCTTGTAGTGCAGGAGGGTAAGCGGAATTCCTAGTGTAGCGGTG  
AAATGCGTAGATATTAGGAGGAACACCCAGTGGCGAAGGCGGCTTCTGGACTGAAACTGACACTGAGGCACGAAAGCATG  
GGTAG  
>ASV:4522:Family:Lachnospiraceae  
TACGGAGGATCCGAGCGTTATCCGGATTTACTGGGTGTAAGGGAGCGTAGACGGATGGCAAGTCTGATGTGAAAACCC  
AGGGCTAACCCCTGGACTGCATTGAAACTGTCTGGCTTGTAGTGCAGGAGGTAAGCGGAATTCCTAGTGTAGCGGTG  
AAATGCGTAGATATTAGGAGGAACACCCAGTGGCGAAGGCGGCTTACTGGGCACCAACTGACGCTGAGGCTCGAAAGTGTG  
GGTAG  
>ASV:4523:Genus:Ruminococcaceae\_UCG-011  
TACGTAGGTGGCAAGCGTTATCCGGAATTATTGGGTGTAAGGGTGCCTAGGCGGGATGTAAGTCAAGTGTGAAATACC  
GCAGCTTAACCTGCGGGCTGCATTTGAAACTTACGTTCTTGTAGTGAAGTAGAGGTAAGCGGAATTCCTAGTGTAGCGGTG  
AAATGCGTAGATATTAGGAGGAACACCCAGTGGCGAAGGCGGCTTACTGGGCTTATACTGACGCTGAGGCACGAAAGTGTG  
GGAG  
>ASV:4524:Kingdom:Bacteria  
TACGGAGGATGCGAGCGTTATCCGGATTTATTGGGTTTAAAGGGTGCCTAGGTTGGTATTTAAGTCAAGCGGTGAAAGTTT  
GTGGCTAACCATAGTTCGCTTTGAAACTGTCAAACCTTGTAGTGCAGAGGGGAGAGTGAATTCCTAGTGTAGCGGTG  
AATGCGTAGATATTAGGAGGAACACCCAGTGGCGAAGGCGGCTTACTGGACGTTAAGTCAAGCGGTGAAAGCGGTG  
GGAGC  
>ASV:4525:Family:Clostridiaceae\_1  
TACGGAGGATCCGAGCGTTATCCGGATTTATTGGGTTTAAAGGGAGCGTAGGCGGACTTTTAAAGTGAAGTGTGAAATACC  
CGGGCTAACCTGGGTGCTGCATTTCAAACCTGGAAGTCTAGAGTGCAGGAGAGGAGAATGGAATTCCTAGTGTAGCGGTG  
AAATGCGTAGATATTAGGAGGAACACCCAGTGGCGAAGGCGGCTTCTGGACGACAACCTGACGCCGAGGCGGCAAGCCAG  
GGAG  
>ASV:4526:Family:Lachnospiraceae  
TACGGAGGATCCGAGCGTTATCCGGATTTATTGGGTTTAAAGGGAGCGTAGATGGCGAAGCAAGTCTGAAGTGAACCC  
AGGGCTAACCCCTGGACTGCTTTGAAACTGTTTTGCTAGAGTGTCCGGAGAGGTAAGTGAATTCCTAGTGTAGCGGTG  
AAATGCGTAGATATTAGGAGGAACACCCAGTGGCGAAGGCGGCTTACTGGGCACCAACTGACGCTGAGGCTCGAAAGTGTG  
GGTAG  
>ASV:4527:Order:Clostridiales  
TACGTAGGGGCGAGCGTTGTCCGGAATTACTGGGCGTAAAGGGAGCGTAGGCGGCAATTAAGTCAAGTGTGAAATTC  
CGGGCTAACCTGGGAGTGCATCTGAAACTGGATGGCTTGTAGTGCAGGAGAGGAAAGTGAATTCCTAGTGTAGCGGTG  
AAATGCGTAGATATTAGGAGGAACACCCAGTGGCGAAGGCGGCTTCTGGACCGTAACTGACGCTGAGGCTCGAAAGCGTG  
GGAG  
>ASV:4528:Genus:Akkermansia  
TACGTATGGAGCAAGCGTTATCCGGATTTACTGGGTGTAAGCGTGCCTAGGCTGTTTCGTAAGTCTGTGTGAAAGGCG  
CGGGCTAACCCCGGCGACGGACATGATACTGCGAGACTAGAGTAATGGAGGGGAACCGGAATTCCTGGTGTAGCGGTG  
AAATGCGTAGAGATCGGAGGAACACCCAGTGGCGAAGGCGGCTGCTGGGCTTAACTGACGCTGAGGCACGAAAGCGTG  
GGTAG  
>ASV:4529:Order:Clostridiales  
TACGTAGGTGGCAAGCGTTGTCCGGAATTACTGGGTGTAAGGGCGTGCAGCCGGGATGCAAGTCAAGTGTGAAATCTC  
AGGGCTAACCCCTGAACTGCATTTGAAACTGTCAAACCTAGAGTACAGGAGAGGAAAGCGGAATTCCTAGTGTAGCGGTG  
AAATGCGTAGATATTAGGAGGAACACCCAGTGGCGAAGGCGGCTTCTGGACTGAAACTGACACTGAGGCACGAAAGTGTG  
GGTAT  
>ASV:4530:Kingdom:Bacteria  
TACGGAGGATCAAGCGTTATCCGGATTTATTGGGTTTAAAGGGTGCCTAGGCGGTTTGATAAGTTAGAGGTGAAATACC  
GGGGCTAACCCCGGGGCTGCGATTGAAACTGACAGCCTTGTAGTATCGGAGAGGAAAGCGGAATTCCTAGTGTAGCGGTG  
AAATGCGTAGATATTAGGAGGAACACCCAGTGGCGAAGGCGGCTGCTGGGCTTAACTGACGCTGAGGCACGAAAGCGTG  
GGTAG  
>ASV:4531:Family:Lachnospiraceae  
TACGGAGGATCCGAGCGTTATCCGGATTTATTGGGTTTAAAGGGAGCGTAGATGGATGTTTAAAGTCAAGTGTGAAAGTTT  
GCGGCTAACCCCGTACTGCATTGAAACTGCTGTACTAGAGTGTCCGGAGGGTAAGCGGAATTCCTAGTGTAGCGGTG  
AAATGCGTAGATATTAGGAGGAACACCCAGTGGCGAAGGCGGCTTACTGGACGATAACTGACGCTGAGGCTCGAAAGCATG  
GGGAT  
>ASV:4532:Order:Bacteroidales

AACGGAGGATCCGAGCGTTATCCGGATTTATTGGGTTAAAGGGAGCGTAGATGGATGTTTAAAGTCAGTTGTGAAAGTTT  
GCGGCTCAACCGTAAAATTGCAAGTGTACTGGGTGTCTTGGTACAGTAGAGGCGAGCGGAATACCCAGTGTAGAGGTG  
AAATTCGTAGATATTGGGTAGAACCACCGTGGCGAAGGCGGCTATCTGGCCATATACGACGCTGAGGCACGAAAGCATG  
GGGAT  
>ASV:4533:Family:Ruminococcaceae  
AACGTAGGTCACAAGCGTTGTCCGGAATTACTGGGTGTAAGGGAGCGCAGGCGGAAGACAAGTTGGAAGTAAATCTA  
TGGGCTCAACCATAAATTGCTTTCAAACCTGCTGGCCTTGGTGTGAGTAGTCAGAGGTAGGTGGAATCCACGTGTAGCAGT  
AAATGCGTAGATATGTGGAAGAACCACCGATGGCGAAGGCGGCTCTGGGACATGACTGACGCTCATGCACGAAAGCGTG  
GGGAG  
>ASV:4534:Order:Clostridiales  
TACGTAGGTGGCAAGCGTTGTCCGGAATTACTGGGTGTAAGGGTGCCTAGGCGGGTATGCAAGTCATATGTGAAATACC  
GGGGCTCAACTCCGGGCTGCATAAGAACTGTATATCTTGGTACAGGAGAGGTAAGCGGAATTCCTAGTGTAGCGGTG  
AAATGCTTAGAGATCATACAGAACCACCGATTGCGAAGGCGAGCTTACCAAATATATCTGACGTTGAGGCACGAAAGCGTG  
GGGAG  
>ASV:4535:Family:Lachnospiraceae  
TACGTAGGGGGCAAGCGTTATCCGGATTTACTGGGTGTAAGGGAGCGTAGACGGCTCTGCAAGTCTGGAGTAAAACCC  
GGGGCTCAACCTGGGACTGCTTTGAAACTGTGAGACTAGAGTGTGCGGAGAGGTAAGTGAATTCCTAGTGTAGCGGTG  
AAATTCGTAGATATTGGGTAGAACCACCGTGGCGAAGGCGGCTATCTGGCCATATACGACGCTGAGGCACGAAAGCATG  
GGGAT  
>ASV:4536:Genus:Erysipelotrichaceae\_UCG-003  
TACGTAGGTGGCGAGCGTTATCCGGAATTATTGGGCGTAAAGAGGGAGCAGGCGGCACTAAGGGTCTGTGGTAAAAGATC  
GAAGCTTAACTTCGGTAAGCCATGAAACCGTAGAGCTAGAGTGTGTGAGAGGATCGTGAATTCATGTGTAGCGGTG  
AATGCTTAGATATCATACAGAACCACCGATTGCGAAGGCGAGCTTACCAAATATATCTGACGTTGAGGCACGAAAGCGTG  
GGAGC  
>ASV:4537:Order:Clostridiales  
TACGTAGGGGGCAAGCGTTATCCGGAATTATTGGGCGTAAAGAGCGCGCAGGTGGTTGATTAAGCCTGATGTGAAAGCCC  
ACGGCTTAAACCGTGGAGGTCATTGAAACTGTCTGGCTCGAGTGCCGGAGAGGTAAGCGGAATTCCTAGTGTAGCGGTG  
AAATGCGTAGATATTAGGAGGAACACCGTAGCGAAGGCGGCTCTCTGGACTGTAACGACGCTGAGGCACGAAAGCGTG  
GGGAG  
>ASV:4538:Genus:Eisenbergiella  
TACGTAGGGAGCGAGCGTTGTCCGGAATTACTGGGTGTAAGGGAGCGTAGACGGCATGGCAAGCCAGATGTGAAAACCC  
AGGGCTCAACCTTGGGATTGCATTTGAAACTGCCAGGCTGGAGTGCAGGAGAGGTAAGCGGAATTCCTAGTGTAGCGGTG  
AAATGCGTAGATATTAGGAGGAACACCGTAGGCGAAGGCGGCTTCTGACTGTAACGACACTGAGGTACGAAAGCGTG  
GGTAG  
>ASV:4539:Family:Lachnospiraceae  
TACGTAGGGAGCGAGCGTTGTCCGGAATTACTGGGTGTAAGGGAGCGTAGGCGGGACGGCAAGTCAGATGTGAAAACCTA  
TGGGCTCAACCCATAAAGTGCATTTGAAACTGTAAGCTGAGGTGCAGGAGGGTGAAGTGAATTCCTAGTGTAGCGGTG  
AAATGCGTAGATATTAGGAGGAACACCGTAGGCGAAGGCGGCTCACTGGACTGTAACGACACTGAGGCTCGAAAGCGTG  
GGGAG  
>ASV:4540:Genus:Christensenellaceae\_R-7\_group  
TACGTAGGGGGCGAGCGTTGTCCGGAATGACTGGGCGTAAAGGGCGTGTAGGCGGCTTTTAAAGTCTGGAGTAAAAGCCC  
CATTTTCAAGGTGGGACTGCTTTGGAGACTGGAGAGCTTGGAGTGCAGGAGGGTGAAGTGAATTCCTAGTGTAGCGGTG  
GAATGCGTAGATATCGGGAGGAACACCGTAGGCGAAGGCGGCTACTGGGCTTAACTGACGTTGAGGCTCGAAAGCGTG  
GGGAG  
>ASV:4541:Kingdom:Bacteria  
TACGTATGGTGCAAGCGTTATCCGGATTTACTGGGTGTAAGGGAGCGTAGGCGGGTGTAAAGTCAGTTGTGAAAGTTT  
GCGGCCCAACCGTAAAATTGAGTTGATACTGGCGACTTGGAGTGCACAGAGGTAGGCGGAATTCGTGGTGTAGCGGTG  
AAATGCGTAGAGATCGGTAGGAACACCGTAGGCGAAGGCGGCTTCTGGACTGAAACTGACGCTGAGGCGGAAAGCGTG  
GGGAG  
>ASV:4542:Kingdom:Bacteria  
TACGGAGGATGCGAGCGTTATCCGGATTTATTGGGTTAAAGGGTGCCTAGGCGGCTTTGCAAGTCAGATGTGAAATCTA  
TGGGCTCAACCCATAAAGTGCATTTCAAACCTGTTTTCTTGGTGTAGTGCAGAGGTAGGCGGAATTCCTAGTGTAGCGGTG  
GAATGTGTAGATATCGGGAAGAACCACCAATGGCGAAGGCGGCTCTGGGCTTAACTGACGCTGAGGAGCGAAAGCGTG  
GGGAG  
>ASV:4543:Family:Ruminococcaceae  
TACGTAGGGGGCAAGCGTTATCCGGATTTACTGGGTGTAAGGGAGCGTAGACGGATGGACAAGTCTGATGTGAAAGGCT  
GGGGCTCAACCATAAAGTGCATTTCAAACCTGTTTTCTTGGTGTAGTGCAGAGGTAGGCGGAATTCCTAGTGTAGCGGTG  
AAATGCGTAGAGATGGGAGGAACACCGTAGGCGAAGGCGGCTGCTGGGCTTAACTGACGCTGAGGCTCGAAAGTGTG  
GGGAG  
>ASV:4544:Family:Ruminococcaceae  
TACGTAGGGTGCAAGCGTTGTCCGGAATTACTGGGTGTAAGGGTGCCTAGGCGGCTTTGCAAGTCAGATGTGAAAACCTA  
TGGGCTTAAACCATAAAGTGCATTTCAAACCTGCGGTTCTTGGTGTAGTGAAGTAGAGGTAAGCGGAATTCCTAGTGTAGCGGTG  
AAATGCGTAGATATCGGGAGGAACACCGTAGGCGAAGGCGGCTACTGGGACCAACTGACGCTGAGGCTCGAAAGTGTG  
GGTAG  
>ASV:4545:Phylum:Firmicutes  
TACGTAGGGTGCAAGCGTTATCCGGAATTATTGGGCGTAAAGCGAGCGCAGGCGGTTTATAAGTCTGAAGTTAAAGGCT  
GTGGCTCAACCATAGTTCGCTTTGAAACTGTCAAACCTGAGTGCAGGAGGGTAAGCGGAATTCCTAGTGTAGCGGTG  
AATGCGTAGATATTAGGAGGAACACCGTAGGCGAAGGCGGATCAACTGGACGATAACTGACGCTGAGGCGGAAAGCGTG

GGAGC

>ASV:4546:Family:Lachnospiraceae

TACGTAGGGAGCAAGCGTTATCCGGATTTACTGGGTGTAAGGGTGCCTAGGTGGCAGTGCAAGTCAGATGTGAAAGGCC  
GGGGCTCAACCCGGAGCTGCATTTGAAACTGCTCGGCTAGAGTACAGGAGAGGCAGGCAGGAAATTCCTAGTGTAGCGGTG  
AAATGCTTAGATATCACGCAGACCCCCGATGGCGAGGGCAGCTGCCAAGCCATGACTGACGCTGATGCACGAAAGCGTG  
GGGAG

>ASV:4547:Genus:Bacteroides

TACGTAGGTGCAAGCGTTATCCGGATTTACTGGGTGTAAGGGTGCCTAGGCGGATTATTGAGTCAGTTGTGAAAGTTT  
GCGGCTCAACCGTAAATTCAGTTGATACTGGTAGTCTTGGTGCAGCAGAGGTAGGCGGAAATTCGTGGTGTAGCGGTG  
AAATGCTTAGATATCACGAAGAACTCCGATTGCGAAGGCAGCTTACTGGACTGTAAGTACGCTGATGCTCGAAAGTGTG  
GGTAT

>ASV:4548:Order:Bacteroidales

TACGGAGGATCCGAGCGTTATCCGGATTTACTGGGTGTAAGGGTGCCTAGGCGGCAGAGCAAGTCAGGCGTAAAGGCCA  
TGGGCTTAACCCATGAACTGCGCTTAAACTGTTTCTGAGTGAAGTAGAGGCAGGCAGGAAATTCCTGGTGTAGCGGTG  
AAATGCTTAGATATCACGAAGAACTCCGATTGCGAAGGCAGCTGCTAAGCTGCAACTGACATTGAGGCTCGAAAGTGTG  
GGTAT

>ASV:4549:Genus:Butyricimonas

TACGGAGGATGCGAGCGTTATCCGGATTTACTGGGTGTAAGGGTGCCTAGGCGGCACGCCAAGTCAGCGGTGAAATTTT  
CGGGCTCAACCCGGAATGTGCCGTTGAAACTGGCGAGCTAGAGTGCACAAGAGGCAGGCAGGAAACAAGTGAAGTAGCGGTG  
AAATGCATAGATATCACTTGGAAACCCGATAGCGAAGGCAGCTTCCAGGCTCGTTCTGACGCTGATGCGCAGAGCGTG  
GGGAG

>ASV:4550:Family:Lachnospiraceae

TACGTAGGGGCGAGCGTTATCCGGATTTACTGGGTGTAAGAGAGCGTAGACGGCGTATCAAGTCTGATGTGAAAGGCT  
GGGGCTTAACCCAGGACTGCATTGAAACTGTTTTCTAGAGTGCAGGAGAGGTAAGCGGAAATTCCTAGTGTAGCGGTG  
AAATGCTTAGATATTAGGAAGAACTCCGATTGCGAAGGCAGCTTACTGGATTGTAAGTACGCTGATGCTCGAAAGTGTG  
GGTAT

>ASV:4551:Genus:Ruminococcaceae\_UCG-013

TACGTAGGTGACAAGCGTTGTCCGGATTTACTGGGTGTAAGGGTGCCTAGGCGGACTGTCAAGTCAGTCGTGAAATACC  
GGGGCTTAACCCGGGGCTGCGATTGAAACTGACAGCCTTGGTATCGGAGAGGAAAGCGGAAATTCCTAGTGTAGCGGTG  
AAATGCTTAGATATCACGAAGAACTCCGATTGCGAAGGCAGCTTCTAAGCTGCAACTGACATTGAGGCTCGAAAGTGTG  
GGTAT

>ASV:4552:Genus:Parabacteroides

TACGGAGGATCCGAGCGTTATCCGGATTTACTGGGTGTAAGGGTGCCTAGGCGGCCTTTAAGTCAGCGGTGAAAGTCT  
GTGGCTCAACCATAGAATTGCCGTTGAAACTGGAGGGCTTGGTATATTTGAGGTAGGCGGAAATGCGTGGTGTAGCGGTG  
GAATGCGTAGATATCGGGAGGAACACCAAGTGGCGAAGGCAGCTTACTGGGCTAAGTACGCTGAGGCTCGAAAGCATG  
GGTAG

>ASV:4553:Genus:Bacteroides

TACGGAGGATGCGAGCGTTATCCGGATTTACTGGGTGTAAGGGGAGCGCAGACGGGTTTTAAGTCAGCTGTGAAAGTTT  
GGGGCTCAACCTTAAATTCAGTTGATACTGGAGACCTTGGCGCAGTTGAGGCAGGCAGGAAATTCGTGGTGTAGCGGTG  
AAATGCTTAGATATCACGAAGAACTCCGATTGCGAAGGCAGCTTCTAAGTGTAACTGACGTTGATGCTCGAAAGTGTG  
GGTAT

>ASV:4554:Family:Fusobacteriaceae

TACGGAGGATGCGAGCGTTATCCGGATTTACTGGGTGTAAGGGTGCCTAGGCGGTTTGGTAAGTCTGATGTGAAATGC  
GGGGCTCAACTCCGATTGCGTTGAAACTGCCAACTAGAGTACTGGAGAGGTGGGCGGAACTACAAGTGTAGAGGTGA  
AATGCGTAGATATCGGGAGGAACACCAAGTGGCGAAGGCAGCGTCTGGGGTGCAGCTGACGCTCAGTCCGAAAGCGTG  
GGAGC

>ASV:4555:Genus:Oscillospira

AACGTAGGTCAACAAGCGTTGTCCGGATTTACTGGGTGTAAGGGTGCAGCCGGGCGGCAAGTCAGATGTGAAATCCA  
CGAGCTTAACCTCGTGAAGTGCATTTGAAACTGTTGGTCTTGGTATCGGAGAGGTAATCGGAAATTCCTTGTGTAGCGGTG  
AAATGCGTAGATATCACGAAGAACTCCGATTGCGAAGGCAGCTTGGGGAGTGCAGCTGACGCTGAAAGTCTGAAAGTGTG  
GGTAT

>ASV:4556:Family:Neisseriaceae

TACGTAGGGTCAAGCGTTAATCGGAATTTACTGGGCGTAAAGCGAGTGCAGACGGTTACTTAAAGCCAGATGTGAAATCCC  
CAAGCTTAACCTGGGACGTGCATTTGAAACTGGGTGACTAGAGTGTGTGAGAGGGAGGTAGAATTCACATGTAGCGGTG  
GAATGCGTAGAGATGTGGAGGAATACCGATGGCGAAGGCAGCTCCTGGGATAACACTGACGTTGAGGCTCGAAAGCGTG  
GGGAG

>ASV:4557:Species:gambrini/massiliae/stagni

TACGGAGGGTCAAGCGTTATCCGGATTTACTGGGTGTAAGGGTCCGTAGGCGGATCCGTAAGTCAGTGGTGAATCTC  
ATAGCTTAACCTAATAACTGCCATTTGATACTGCGGGTCTTGGTAAAGTGAAGTAGCTGGAATAAGTGTAGCGGTG  
AAATGCATAGATATTACTTAGAACCAATGCGAAGGCAGCTTACTATGTCTTAACTGACGCTGATGGACGAAAGCGTG  
GGGAG

>ASV:4558:Order:Bacteroidales

TACGGAGGATGCGAGCGTTATCCGGATTTACTGGGTGTAAGGGTGCCTAGGCGGTTAAGTCAAGTCAGCGGTGAAAGTTT  
GTGGCTCAACCATAAAATTCGAATTTGATACTGGCAGTCTTGGTACAGTTGAGGTAGGCGGAAATTCGTGGTGTAGCGGTG  
AAATGCGTAGAGATCTGGAGGAATACCGTGGCGAAGGCAGCCCCCTGGACGAAGACTGACGCTCAGGTGCGAAAGCGTG  
GGGAG

>ASV:4559:Species:aquatica

TACGTAGGGTGCAGCGTTAATCGGAATTTACTGGGCGTAAAGCGTGCAGGCGGTTGTGCAAGACAGGCGTGAATCCC



CGGGCTTAACCTGGGAATGGCCTTGTGACTGCACGACTGGAGTGGCGCAGAGGGGGATGGAATTCGCGTGTAGCAGTG  
AAATGCGTAGATATGCGGAGGAACACCCGATGGCGAAGGCAGTCCCCTGGGCCTGCACTGACGCTCATGCACGAAAGCGTG  
GGGAG

>ASV:4560:Family:Lachnospiraceae

TACGGGGGATGCGAGCGTTATCCGGATTTATTGGGTTTAAAGGGTGCCTAGGCGGCGAATTAAGTCAGCGGTGAAAGACC  
GGGGCTCAACCCCGTACTGCATTGAAACTGTCGACTAGAGTGTGGAGGGTAAGTGAATTCCTAGTGTAGCGGTG  
AAATGCGTAGATATTAGGAGGAACACCCAGTGGCGAAGGCGCCTGCTGGACCAACTGACGCTGAGGCTCGAAAGTGTG  
GGTAG

>ASV:4561:Genus:Moryella

TACGTAGGGGGCAAGCGTTATCCGGATTTACTGGGTGTAAGGGAGCGCAGACGGCTGTGCAAGTCTGAAGTGAAGCCC  
GCGGCTCAACTGCGGGATTGCTTTGAAACTGTGCGCTTGTAGTATCGGAGAGGTAAGCGGAATTCCTAGTGTAGCGGTG  
AAATGCGTAGATATTGGAGGAACACCCGTTGGCGAAGGCGGTTACTGGACGAAACTGACGTTGAGGCTCGAAGGCGTG  
GGGAG

>ASV:4562:Family:Ruminococcaceae

TACGTAGGTGACAAGCGTTGTCCGGATTTACTGGGTGTAAGGGGCGCTAGGCGGACTGTCAAGTCAGTCTGAAATACC  
GGGGCTTAACCCCGGGCTGCGATTGAAACTGACAGCCTTGTAGTACAGTAGAGGTGGGCGGAATTCCTAGTGTAGCGGTG  
AAATGCGTAGATATCACGAAGAACTCCGATTGCGAAGGCAGCCTGCTAACTGTAAGTACGCTTCATGCTCGAAAGTGTG  
GGTAT

>ASV:4563:Phylum:Firmicutes

TACGTAGGGGGCAAGCGTTATCCGGATTTATTGGGCGTAAAGCGAGCGCAGGCGGTTTGATAAGTCTGAAGTTAAAGGCT  
GTGGCTCAACCATAGTTCGCTTTGAAACTGTCAAACCTTGTAGTGCAGAGGGGAGAGTGAATTCCTAGTGTAGCGGTG  
AATGCGTAGATATTAGGAGGAACACCCAGTGGCGAAGGCGGCTTACTGGACGATTACTGACGCTGAGGCTCGAAAGCGTGG  
GGAG

>ASV:4564:Family:Lachnospiraceae

TACGTAGGGGGCAAGCGTTATCCGGATTTACTGGGTGTAAGGGGAGCGTAGACGGCGACACAAGTCTGAAGTGAATACC  
TGGGCTCAACCTGGAACTGCTTTGAAACTGTGTTGCTAGAGTGTGGAGAGGTAAGCGGAATTCCTAGTGTAGCGGTG  
AAATGCGTAGATATCACGAAGAACTCCGATTGCGAAGGCAGCTACTAGACTGCAACTGACACTGATGCTCGAAAGTGTG  
GGTAT

>ASV:4565:Phylum:Firmicutes

TACGTAGGGGGCGAGCGTTGTCCGGAATTTACTGGGCGTAAAGGGTGCCTAGGCGGCCTGAAAAGTCCGATGTGAAAGACC  
CGTGCTTAACATGGGGTTGCATCCGAAACTTTCCGGCTTGTAGTGCAGAGAGGCAAGTGAATTCCTAGTGTAGCGGTG  
AAATGCGTAGATATTGGGAGGAACACCCGTTGGCGAAGGCGGCTTACTGGCACCAACTGACGCTGAGGCTCGAAAGTGTG  
GGTAG

>ASV:4566:Family:Lachnospiraceae

TACGTAGGGGGCAAGCGTTATCCGGATTTACTGGGTGTAAGGGGAGCGTAGACGGTTTTGCAAGTCTGAAGTGAAGCCC  
GGGGCTTAGCCCCGGGACTGCTTTGGAGACTGTAGGACTAGAGTGCAGGAGAGGTAAGTGAATTCCTAGTGTAGCGGTG  
AAATGCTTAGATATCACGAAGAACTCCGATTGCGAAGGCAGCCTGCTGGACTGTAAGTACGCTGATGCTCGAAAGTGTG  
GGTAT

>ASV:4567:Genus:DTU089

TACGTAGGGGAGCGAGCGTTGTCCGGATTTACTGGGTGTAAGGGTGCCTAGGCGGATTTTCAAGTCAGTGTGAAATGCA  
GGGGCTTAACCCCTGAGCTGCTATTGAAACTGAGAGTCTTGTAGTGGAGTAGAGGCAGGCGGAATTCCTAGTGTAGCGGTG  
AAATGCGTAGAGATCGGGAGGAACACCCAGTGGCGAAGGCGGCTGCTGGGCTTTAACTGACGCTGAGGCACGAAAGCATG  
GGTAG

>ASV:4568:Genus:Ruminococcaceae\_UCG-002

AACGTAGGGTGCAAGCGTTGTCCGGATTTACTGGGTGTAAGGGGCGTGCAGCCGGTCTGCAAGTCAAGTGTGAAATCCA  
TGGGCTCAACCCATGAAGTGCATTTGAAACTGTAGATCTTGTAGTGTGGAGGGGCAATCGGAATTCCTAGTGTAGCGGTG  
AAATGCGTAGATATTAGGAGGAACCCGATTGCGAAGGCAGCCTGCTAAGCTGCAACTGACATTGAGGCTCGAAAGTGTG  
GGTAT

>ASV:4569:Genus:Bacteroides

AACGTAGGGTGCAAGCGTTGTCCGGAATTTACTGGGTGTAAGGGGAGCGCAGGCGGACCGGCAAGTTGGAAGTAAAACCTA  
TGGGCTCAACCCATAAATTGCAAGTGTGATACTGGATATCTTGTAGTGCAGTTGAGGCAGGCGGAATTCCTAGTGTAGCGGTG  
AAATGCTTAGATATCACGAAGAACTCCGATTGCGAAGGCAGCCTGCTAAGCTGCAACTGACATTGAGGCTCGAAAGTGTG  
GGTAT

>ASV:4570:Genus:Caproiciproducens

TACGTAGGGGGCAAGCGTTATCCGGAATTTACTGGGTGTAAGGGTGCCTAGGCGGGAAAGCAAGTCAAGCGGTGAAAACCTA  
TCGGCTTAACCTGGTAGACTGCTTTGAAACTGTTTTCTTGTAGTGAAGTAGAGGTAGGCGGAATTCCTAGTGTAGCGGTG  
GAATGCGTAGAGATCGGGAGGAACACCCAGTGGCGAAGGCGGCTTACTGGGCTTTAACTGACGCTGAGGCACGAAAGCATG  
GGTAG

>ASV:4571:Family:Lachnospiraceae

TACGGAGGATCCGAGCGTTATCCGGATTTACTGGGTGTAAGGGGAGCGTAGACGGCGCAGCAAGTCTGATGTGAAAGGCA  
GGGGCTTAACCCCTGGACTGCATTGAAACTGCTGTACTTGTAGTGCAGGAGGTAAGCGGAATTCCTAGTGTAGCGGTG  
AAATGCGTAGATATCACGCAGAACTCCGATTGCGAAGGCAGCTTACTAAACATAACTGACACTGAAGCACGAAAGCGTG  
GGGAT

>ASV:4572:Genus:Blautia

TACGTAGGGGGCAAGCGTTATCCGGATTTACTGGGTGTAAGGGGAGCGTAGACGGAAGGCAAGTCTGATGTGAAAGGCA  
GGGGCTTAACCCCTGGACTGCATTGAAACTGTCATACTTGTAGTGCAGGAGGGTAAGCGGAATTCCTAGTGTAGCGGTG  
AAATGCGTAGATATTAGGAGGAACACCCAGTGGCGAAGGCGGCTCTCTGGACTGTAAGTACGCTTGTAGGCTCGAAAGCGTG  
GGGAG

>ASV:4573:Family:Burkholderiaceae  
TACGTAGGGTGAACGCGTTAATCGGAATTACTGGGCGTAAAGCGTGCAGGCGGTTATGTAAGACAGAGGTGAAATCCC  
CGGGCTCAACCTGGGAACTGCCTTTGTGACTGCATAGCTAGAGTACGGTAGAGGGGGATGGAATCCCGCTGTAGCAGTG  
AAATGCGTAGATATCGGAGGAACACCGATGGCGAAGGCAATCCCCTGGACCTGTACTGACGCTCATGCACGAAAGCGTG  
GGGAG

>ASV:4574:Family:Bifidobacteriaceae  
TACGTAAGGGGCTAGCGTTATCCGGAATTACTGGGCGTAAAGGGTGCCTAGGTGGTTTCTTAAGTCAGAGGTGAAAGGCT  
ACGGCTCAACCGTAGTAAGCCTTTGAACTGGGAACTTGCATGAGTGCAGGAGAGGAGTGGAAATCCCGGTGTAACGGTGG  
AATGTGTAGATATCGGGAAGAACAACCAATGGCGAAGGCAAGTCTCTGGGCCGTTACTGACGCTGAGGAGCGAAAGCGTG  
GGAGC

>ASV:4575:Phylum:Proteobacteria  
TACGGAGGGTGAACGCGTTAATCGGAATTACTGGGCGTAAAGCGCGCTAGGTTGTTTTGTAAGTCAGAGGTGTAATCCC  
ACGGCTTAACCGTGGAACTGCCTTTGATACTGCATAACTTGGATCCGGGAGAGGACAGCGGAATCCAGGTGTAGCGGTG  
AAATGCGTAGATATCGGAGGAACACCGATGGCGAAGGCGACTACTGGGCACCAACTGACGCTGAGGCTCGAAAGCATG  
GGTAG

>ASV:4576:Phylum:Firmicutes  
TACGTAGGGGGCAAGCGTTATCCGGATTTACTGGGTGTAAGGGAGCGTAGACGGTGTGGCAAGTCTGATGTGAAAGCC  
GGGGCTCAACCGGGGAGGGTCAATGGAACTGTCGTACTAGAGTGCAGGAGAGGCAATGGAATCCATGTGTAGCGGTG  
AAATGCGTAGATATGGAAGAACAACCGGTGGCGAAGGCGGTTGCTGGTCTGAAACTGACGCTGAAGTACGAAAGCGTG  
GGGAG

>ASV:4577:Genus:Granulicatella  
TACGTATGGAGCAAGCGTTATCCGGATTTACTGGGTGTAAGCGAGCGCAGGCGGTTCTTAAGTCTGATGTGAAAGCC  
CCGGCTCAACCGGGGAGGGTCAATGGAACTGGGAACTTGCATGAGTGCAGGAGAGGAAAGCGGAATCCATGTGTAGCGGTG  
AAATGCGTAGATATGGAAGAACAACCGATGGCGAAGGCGACTCTCTGGTCTGTAAGTACGCTGAGGCTCGAAAGCGTG  
GGTAG

>ASV:4578:Genus:Lachnospiraceae\_UCG-010  
TACGTAGGGGGCAAGCGTTATCCGGAATTACTGGGTGTAAGGGAGAGTAGGCGCGAAGTAAGTAAGTGTGAAAGCC  
TCGGCTTAACCGGGGAGGGTCAATGGAACTATTTTGCATAGAGTGCAGGAGAGGAAAGCGGAATCCATGTGTAGCGGTG  
AAATGCGTAGATATTAGGAAGAACAACCGATGGCGAAGGCGGCTTTCTGGACTGTAAGTACGCTGAGGCTCGAAAGCGTG  
GGGAG

>ASV:4579:Family:Christensenellaceae  
TACGGAGGATCCGAGCGTTGTCCGGAATTACTGGGCGTAAAGGGTGCCTAGGCGGTTTTTTAAGTCAGATGTGAAATACC  
CGTGCTCAACATGGGGGTGCATCTGATACTGGAAGACTTGCATGAGTGCAGGAGAGGAAAGCGGAATCCAGTGTAGCGGTG  
AAATGCGTAGAGATTGGGAGGAACAACCGATGGCGAAGGCGACTAACTGGACTGTAAGTACGCTGAGGCGGAAAGTGTG  
GGTAT

>ASV:4580:Genus:Ruminococcaceae\_UCG-005  
TACGTAGGTTGCAAGCGTTGTCCGGATTTACTGGGTGTAAGGGGCGTAGGCGGAGATGCAAGTTGGGAGTGAATCCA  
TGGGCTCAACCCATGAACTGCTCTCAAACTGTATCCCTTGCATGAGTATCGGAGAGGCAAGCGGAATCCATGTGTAGCGGTG  
GAATGCTTAGATATCACGAAGAACAACCGATTGCGAAGGCGACTGCTAAGTGCACCTGACATTGAGGCTCGAAAGTGTG  
GGTAT

>ASV:4581:Order:Clostridiales  
AACGTAGGTCAACGCGTTGTCCGGAATTACTGGGTGTAAGGGAGCGTAGGCGGGATCGCAAGTCAGATGTGAAACTA  
TGGGCTTAACCCATAAACTGCATTTGAACTGTGGTTCTTGCATGAGTGAAGTAGAGGTAAGCGGAATCCGTGGTGTAGCGGTG  
AAATGCTTAGATATCACGAAGAACAACCGATTGCGAAGGCATCTCACGAGGAGTTGATTGACGCTGAGGCACGAAAGCGTG  
GGGAT

>ASV:4582:Family:Lachnospiraceae  
TACGGAGGATCCGAGCGTTATCCGGATTTACTGGGTGTAAGGGGAGCGTAGACGGAATGCAAGTCTGAAGTGAATACC  
CGGGCTCAACCTGGGAACTGCTTTGAACTGTTGTTCTAGAGTGTGGAGAGGTAAGTGGAAATCCCGGTGTAGCGGTG  
GAATGCGTAGATATCGGAGGAACAACCGATGGCGAAGGCGGCTACTGGGCACCAACTGACGCTGAGGCTCGAAAGTGTG  
GGTAG

>ASV:4583:Family:Ruminococcaceae  
TACGTAGGTGGCAAGCGTTGTCCGGATTTACTGGGTGTAAGGGGCGTAGCCGGGAGGCAAGTCAAGTGTGAAATCCA  
CGGGCTCAACTCGTGAAGTGCATTTGAACTGTTTTCTTGCATGAGTGCAGAGGTAGGCGGAATCCCGGTGTAGCGGTG  
GAATGCGTAGATATCGGAGGAACAACCGATGGCGAAGGCGGCTACTGGGCACCAACTGACGCTGAGGCTCGAAAGTGTG  
GGGAG

>ASV:4584:Family:Ruminococcaceae  
TACGTAGGGAGCGAGCGTTGTCCGGATTTACTGGGTGTAAGGGTGCCTAGGTGGGATGCAAGTCAAGTGTGAAATACC  
GGGGCTTAACCTCGGGGCTGCATTTGAACTGCTGTTCTTGCATGAGTGAAGTAGAGGCAAGCGGAATCCATGTGTAGCGGTG  
AAATGCGTAGATATTAGGAGGAACAACCGATGGCGAAGGCGACTACTGGACTGCTACTGACACTGAGGCACGAAAGCGTG  
GGGAG

>ASV:4585:Genus:Peptoniphilus  
TACGTAGGGGGCGAGCGTTGTCCGGAATCACTGGGCGTAAAGGGTTCGAGGCGGTTTACCAAGTCCGATGTGAAAGGCA  
TGGGCTCAACCCATGTAAGCATTGAACTGGTAGACTTGCATTAAGGAGAGGTAAGTGGAAATCCATGTGTAGCGGTG  
AATGCGTAGATATTAGGAAGAACAACCGGTGGCGAAGGCGACTACTGGACTTAAACTGACGCTGAGGAAAGCGGTG  
GGAGC

>ASV:4586:Family:Erysipelotrichaceae  
TACGTAGGTGGCAAGCGTTATCCGGAATCACTGGGCGTAAAGGGTGCCTAGGTGGCGTACTAAGTCTGTAGTAAAGGCA  
ATGGCTCAACCATGTAAGCTATGAAACTGGTATGCTGGAGTGCAGGAGGGCGATGGAATCCATGTGTAGCGGTAA

AATGCGTAGGTATATGGAGGAACACCAGTGGCGAAGGCGGTCGCCTGGTCTGTAAGTACACTGAGGCACGAAAGCGTGG  
GGAGC  
>ASV:4587:Genus:Granulicatella  
TACGTAGGTGGCAAGCGTTGTCCGGATTTATTGGGCGTAAAGCGAGCGCAGGCGGTCATTAAGTCTGATGTGAAAGCCC  
CCGGCTCAACCGGGGAGGGTATTGGAAGCTGGTTGACTTGAGTGCAGAAGAGGAGTGAATTCCATGTGTAGCGGTG  
AAATGCGTAGATATATGGAGGAACACCAGTGGCGAAGGCGACTCTCTGGTCTGTAAGTACACTGAGGCTCGAAAGCGTG  
GGTAG  
>ASV:4588:Kingdom:Bacteria  
TACAGAGGATCCGAGCGTTATCCGGATTTATTGGGTTAAAGGGAGCGTAGGTGGATTGTTAAGTCAAGTGTGAAAGTTT  
GCGGCTCAACCGTAAAATTGCAGTTGAAACTGGCAGTCTTGAGTACCGGAGAGGGTGGCGGAATTCAGGTGTAGGAGTG  
AAATGCGTAGATATCTGGAGGAACACCAGTGGCGAAGGCGGCACCTGGACGTTAAGTACACTGAGGCTCGAAAGCGTG  
GGTAG  
>ASV:4589:Family:Ruminococcaceae  
TACGTAGGGAGCGAGCGTTGTCCGGATTTACTGGGTGTAAGGGAGCGTAGGCGGGACGGCAAGTTGAATGTGAAATGCA  
TGGGCTTAACCCATGAGCTGCGTTCAAACCTGCTGTTCTTGAGTGAAGTAGAGGCAGGCGGAATTCCTAGTGTAGCGGTG  
AAATGCGTAGATATTAGGAGGAACACCAGTGGCGAAGGCGGCCTGCTGGGCTTTAAGTACACTGAGGCTCGAAAGCATG  
GGGAG  
>ASV:4590:Genus:Flavonifractor  
TACGTAGGTGGCAGCGTTATCCGGATTTACTGGGTGTAAGGGGCGTGTAGGCGGGTGGCAAGTCAAGTGTGAAAACCA  
GGGGCTCAACCTCTGGCCTGCATTTGAAACTGTTGGTCTTGAGTGTGGAGAGGCAATCGGAATTCCTGTGTAGCGGTG  
AAATGCGTAGATATACGGAGGAACACCAGTGGCGAAGGCGGATTGCTGGACAGTAACTGACGCTGAGGCGCGAAAGCGTG  
GGGAG  
>ASV:4591:Genus:UBA1819  
CCCTTCTTTTTCCCTCTTTTTCTTCTTCTGGGTGTAAGGGAGCGCAGGCGGATTGGCAAGTTGGGAGTGAATCTA  
TGGGCTCAACCCATAAATTGCTTTCAAACCTGTCAGTCTTGAGTGGTGTAGAGGTAGGCGGAATTCCTGGTGTAGCGGTG  
GAATGCGTAGATATCGGGAGGAACACCAGTGGCGAAGGCGGCCTACTGGGCTAACTGACGCTGAGGCTCGAAAGCATG  
GGTAG  
>ASV:4592:Family:Lachnospiraceae  
TACGGAGGATCCGAGCGTTATCCGGATTTACTGGGTGTAAGGGAGCGTAGACGGTAAAGCAAGTCTGAAGTGAAGGCC  
GCGGCTCAACTGCGGACTGCTTTGAAACTGTTAACTGGAGTGTGGAGAGGTAAGTGAATTCCTAGTGTAGCGGTG  
AAATGCGTAGATATTAGGAGGAACACCAGTGGCGAAGGCGGCTTCTGGACTGAAACTGACGCTGAGGCTCGAAGGCGTG  
GGGAG  
>ASV:4593:Genus:Ruminiclostridium\_5  
TACGTAGGGAGCGAGCGTTGTCCGGATTTACTGGGTGTAAGGGTGCCTAGGCGGCTTAGCAAGTCAAGGCGTGAATCTA  
TGGGCTTAACCCATAAAGTGCCTTCAAACCTGCTGGGCTTGAGTGAAGTAGAGGCAGGCGGAATTCCTGGTGTAGCGGTG  
AAATGCGTAGAGATCGGGAGGAACACCAGTGGCGAAGGCGGCCTGCTGGGCTTTAAGTACACTGACGCTGAGGCACGAAAGCGTG  
GGTAG  
>ASV:4594:Family:Lachnospiraceae  
TACGTAGGTGGCAAGCGTTATCCGGATTTACTGGGTGTAAGGGAGCGTAGACGGTTTAGCAAGTCTGAAGTGAAGGCC  
GCGGCTCAACTGCGGACTGCTTTGAAACTGTTAACTGGAGTGTGGAGAGGTAAGTGAATTCCTGGTGTAGCGGTG  
AAATGCGTAGAGATCGGGAGGAACACCAGTGGCGAAGGCGGCCTACTGGGCTTTAAGTACACTGACGCTGAGGCACGAAAGCATG  
GGTAG  
>ASV:4595:Genus:Family\_XIII\_AD3011\_group  
TACGTAGGGGGCAAGCGTTATCCGGATTTATTGGGCGTAAAGAGTACGTAGGTGGTTACCTAAGCAAGGGGTTAAGGCA  
ATGGCTTAACCTATTGTTGCGCCCTTGAACCTGGGCTACTTGAGTGCAGGAGAGGAAAGCGGAATTCCTAGTGTAGCGGTG  
AATGCGTAGATATTAGGAGGAACACCAGTGGCGAAGGCGGCTTCTGGATTGTAAGTACACTGAGGCTACGAAAGCGTGG  
GGAGC  
>ASV:4596:Family:Lachnospiraceae  
TACGTAAAGGGGCAAGCGTTATCCGGATTTACTGGGTGTAAGGGAGCGTAGACGGATGGACAAGTCTGATGTGAAAGGCT  
GGGGCTCAACCCCGGACTGCTTTGAAACTGTTTTCTTGAGTGTGGAGAGGCAAGCGGAATTCCTAGTGTAGCGGTG  
AAATGCGTAGATATTAGGAGGAACACCAGTGGCGAAGGCGGCTTCTGGACATTAAGTACACTGAGGCTGAGGCGCGAAAGCGTG  
GGGAG  
>ASV:4597:Class:Bacteroidia  
TACGTAGGGAGCGAGCGTTGTCCGGATTTACTGGGTGTAAGGGTGCCTAGGTGGATTGTTAAGTCAAGTGTGAAAGTTT  
GCGGCTCAACCGTAAAATTGCAGTTGAAACTGGCAGTCTTGAGTACAGTAGAGGTGGGCGGAATTCGTGGTGTAGCGGTG  
AAATGCTTAGATATCGAGAGGAACACTCGTGGCGAAGGCGGTTCTTGACATTAAGTACACTGAGGCTGAGGCACGAAAGCCAG  
GGGAG  
>ASV:4598:Order:Bacteroidales  
TACGTAGGGGGCAAGCGTTATCCGGATTTATTGGGTTAAAGGGAGCGTAGGTGGATTATTAAGTCAAGTGTGAAAGTTT  
GCGGCTCAACCGTAAAATTGCAGTTGATACTGGCGACCTTGAGTGAACAGAGGTAGGCGGAATTCCTAGTGTAGCGGTG  
AAATGCGTAGATATTAGGAGGAACACCAGTGGCGAAGGCGGCTCTCTGGACTGTAAGTACACTGAGGCTGAGGCACGAAAGCGTG  
GGGAG  
>ASV:4599:Order:Clostridiales  
TACGTAGGGAGCAAGCGTTGTCCGGATTTACTGGGTGTAAGGGTGCCTAGGCGGCTAGGCAAGTCAAGTGTGAAATCTA  
TGGGCTCAACCCATAAAGTGCCTTCAAACCTGTTTTCTTGAGTGTGAGAGGTAAGTGAATTCCTGGTGTAGCGGTG  
AAATGCGTAGATATTAGGAGGAACACCAGTGGCGAAGGCGGTTCTCTGGGCTCACTGACGCTGAGGAGCGAAAGCGTG  
GGGAG  
>ASV:4600:Order:Clostridiales

TACGTAGGGGGCGAGCGTTGTCCGGAATTACTGGGCGTAAAGGGCGCGCAGGCGGCCGATCAAGTCAGATGTGAAACCCC  
CGGGCTCAACCTGGGAACTGCATTTGAAACTGGTTGGCTTGAAGTGCAGGAGAGGAAAGCGGAATTCCTAGTGTAGCGGTG  
AAATGCGTAGATATTAGGAGGAACACCAGTGGCGAAGGCGGCTTGTCTGGACAGTAACGACGTTGAGGCTCGAAAGCGTG  
GGGAG

>ASV:4601:Family:Lachnospiraceae

TACGTAGGGGGCAAGCGTTATCCGGATTTACTGGGTGTAAGGGAGCGTAGACGGTGTGGCAAGTCTGATGTGAAAGGCA  
TGGGCTCAACCTGTGGACTGCATTTGAAACTGTCATACTTGAAGTGCAGAAGAGGGTAGTGGAATCCATGTGTAGCGGTG  
AAATGCGTAGATATATGGAAGAACACCAGTGGCGAAGGCGGCTGTCTGGTCTGCAACTGACGCTGAGGCTCGAAAGCATG  
GGTAG

>ASV:4602:Family:Lachnospiraceae

TACGTAGGGTCAAGCGTTATCCGGATTTACTGGGTGTAAGGGAGCGTAGACGGCGACACAAGTCTGAAGTGAATACC  
CGGGCTCAACCTGGGAACTGCTTTGAAACTGTGTTGCTAGAGTGTGGAGAGGTAAGCGGAATTCCTAGTGTAGCGGTG  
AAATGCTTAGATATCACGAAGAACCCGATTGCGAAGGCAGCTCACTGGAGCGCAACTGACGCTGAAGCTCGAAAGTGCG  
GGTAT

>ASV:4603:Family:Lachnospiraceae

TACGTAGGGGGCAAGCGTTATCCGGATTTACTGGGTGTAAGGGAGCGTAGGCGGCTTGGTAAGTCAAGAAGTAAAGCCC  
AGGGCTTAACCTGGGACTGCTTTGAAACTGCCAGGCTTATTGCCGGAGAGGTAAGTGAATTCCTAGTGTAGCGGTG  
AAATGCGTAGATATTAGGAGGAACACCAGTGGCGAAGGCGGCTTACTGGACGGTCAATGACGCTGAGGCTCGAAAGTGTG  
GGTAG

>ASV:4604:Genus:Oscillospira

TACGGAAGGTCGGGGCTTATCCGGATTTACTGGGTGTAAGGGCGGTAGCCGGGGAGACAAGTCAAGTGTGAAATCTG  
GAGGCTCAACCTCAAACTGCATTTGAAACTGTTTCTCTTGAAGTATCGGAGAGGTAATCGGAATTCCTAGTGTAGCGGTG  
AAATGCGTAGATATTAGGAAGAACACCAGTGGCGAAGGCGGATTACTGGACGACAACGACGCTGAGGCGCGAAAGCGTG  
GGGAG

>ASV:4605:Genus:Butyricicoccus

TACGTAGGGAGCAAGCGTTATCCGGATTTACTGGGTGTAAGGGCGCGCAGGCGGGCTTGAAGTTGGGAGTAAATCCC  
GGGGCTTAACCCGGAAGTCTCTCAAAGTGCAGTCTTGAAGTGTGGAGAGGCGAGCGGAATTCCTAGTGTAGCGGTG  
AAATGCGTAGATATTGGGAGGAACACCAGTGGCGAAGGCGGCTTGTCTGGACATTAACGACGCTGAGGCGCGAAAGCGTG  
GGGAG

>ASV:4606:Genus:Adlercreutzia

TACGGAGGATCCGAGCGTTATCCGGATTTATTGGGCGTAAAGGGCGCGTAGGCGGGCCCTAAGCGGAACCTCTAATCCC  
GGGGCTCAACCTCGGGCCGGTTCGGACTGGGCGGCTCGAGTGCAGTAGAGGCGAGCGGAATTCCTAGTGTAGCGGTG  
AAATGCTTAGATATCACGAAGAACCCGATTGCGAAGGCAGCCTGCTGGACTGTAACGACGCTGATGCTCGAAAGTGTGG  
GTATC

>ASV:4607:Order:Clostridiales

TATGTAGGTGGCAAGCGTTATCCGGATTTACTGGGTGTAAGGGCGGTAGGCGGGATCGCAAGTCAAGTGTGAAAAGT  
GAGGCTCAACCTCGAAATGCTCTGATACTGTTAGTCTAGAGTATAGTTGCGGAAGGCGGAATTCCTAGTGTAGCGGTG  
AAATGCTTAGATATTAGGAAGAACCCGATTGCGAAGGCAGCTTACTGGATTGTAACGACGCTGATGCTCGAAAGTGTG  
GGTAT

>ASV:4608:Family:Rikenellaceae

AACGTAGGTCACAAGCGTTGTCCGGAATTATTGGGTTAAAGGGTGCCTAGGCGGATTAGTAAGTTAGAGGTGAAAGCTC  
GATGCTCAACATCGAAATGCTCTGATACTGTTAGTCTAGAGTATAGTTGCGGAAGGCGGAATGTGTGGTGTAGCGGTG  
AAATGCTTAGATATCACACAGAACCCGATTGCGAAGGCAGCTTACTGGATTGTAACGACGCTGATGCTCGAAAGTGTG  
GGTAT

>ASV:4609:Kingdom:Bacteria

TACGTAGGGAGCAAGCGTTATCCGGATTTACTGGGTGTAAGGGCGCGCAGGCGGGCCGGTAAGTTGGAAGTGAATCTA  
TGGGCTTAACCCATAAAGTCTTCAAAGTCTGTTGCTTGAAGTATGTTTGAAGCAGGCGGAATTCCTAGTGTAGCGGTG  
AAATGCTTAGATATCACGAAGAACCCGATTGCGAAGGCAGCCTGCTAAGCTGCAACTGACATTGAGGCTCGAAAGTGTG  
GGTAT

>ASV:4610:Family:Ruminococcaceae

TACGTAGGGAGCAAGCGTTGTCCGGAATTACTGGGTGTAAGGGAGCGTAGGCGGGGATACAAGTTGGATGTTAATCTA  
CCGGCTCAACTGGTAGCTGCATCCAAAAGTATTTCTTGAAGTGAAGTAGAGGCGAGGCGGAATTCCTAGTGTAGCGGTG  
AAATGCGTAGATATTAGGAGGAACACCAGTGGCGAAGGCGGCTTGTGGGCTTTAACTGACGCTGAGGCTCGAAAGCGTGG  
GGAGC

>ASV:4611:Class:Bacteroidia

TACGGAGGATCCGAGCGTTATCCGGATTTATTGGGTCTAAAGGGAGCGTAGGTGGATTGTTAAGTCAAGTGTGAAAAGTT  
GCGGCTCAACCGTAAATGAGTTGATACTGGGTGCTTGAAGTACAGTAGAGGTAAGCGGAATTCCTAGTGTAGCGGTG  
AAATGCGTAGAGATCAGGAGGAACATCGGTGGCGAAGGCGGCTTACTGGGCTTTACTGACGCTGAGGCTCGAAAGCGTG  
GGGAG

>ASV:4612:Family:Ruminococcaceae

TACGTAGGTGGCAAGCGTTGTCCGGAATTACTGGGTGTAAGGGAGCGTAGGCGGGAAGACAAGTTGGATGTTAATCTA  
CCGGCTCAACCGGTAGCCGATTTCAAAGTGTGTTTCTTGAAGTGAAGTAGAGGTAAGGCGGAATTCCTAGTGTAGCGGTG  
AAATGCGTAGATATTAGGAGGAACACCAGTGGCGAAGGCGGCTTACTGGGCTTTAACTGACGCTGAGGCTCGAAAGCGTGG  
GTAGC

>ASV:4613:Class:Bacteroidia

TACGTAGGTGGCAAGCGTTGTCCGGAATTATTGGGTTAAAGGGTGCCTAGGCGGCTTTAAGTCAAGCGGTGAAAGTCT  
GTGGCTCAACCATAGAATTGCCGTTGAAACTGGGGGCTTGAAGTATGTTTGAAGCAGGCGGAATGCGTGGTGTAGCGGTG  
AAATGCGTAGATATTAGGAGGAACACCAGTGGCGAAGGCGGCAACTGGGCTTTACTGACGCTGAGGCTCGAAAGTGTG

GGGAG

>ASV:4614:Genus:Porphyrobacter

TACGGAGGGAGCTAGCGTTGTTCCGGAATTACTGGGCGTAAAGCGCACGTAGGCGGCTTTTTAAGTCAGGGGTGAAATCCC  
GGGGCTCAACCCCGGAAGTGCCTTGAAGTGGGAAAGCTAGAATCTTGGAGAGGCGAGTGGAATTCAGAGTGTAGAGGTG  
AAAGTTGTAGATATTCGGAAGAACCAGTGGCGAAGGCGACTCGCTGGACAAGTATTGACGCTGAGGTGCGAAAGCGTG  
GGGAG

>ASV:4615:Genus:Negativibacillus

TACGTAGGTGCGAAGCGTTGTCGGAATTACTGGGTGTAAGGGAGCGTAGGCGGGGAGGCAAGTTGAATGTCTAAACTA  
TCGGCTCAACTGATAGTCGCGTTCAAAGTGCCTCTTGTAGTGCAGTAGAGGTAGGCGGAATTCCTAGTGTAGCGGTGA  
AATGCGTAGATATTAGGAGGAACACCAGTGGCGAAGGCGGTCAACTGGACGATAACTGACGCTGAGGCGGAAAGCGTGG  
GGAGC

>ASV:4616:Genus:DNF00809

TACGTAGGGGGCGAGCGTTATCCGGATTACTGGGCGTAAAGCGCGCTAGGCGGCCCTCAAGCGGGACCTCTAATCCC  
GGGGCTCAACCCCGGGCGGGTCCCAGAACTGGGCGGCTCGAGTCAAGTGTAGAGGCGAGGCGGAATTCCTAGTGTAGCGGTGA  
AATGCGCAGATATCGGGAAGAACCAGTGGCGAAGGCGGCTGCTGGGCTTACTGACGCTGAGGCGGAAAGCGGG  
GGAGC

>ASV:4617:Family:Lachnospiraceae

TACGTATGGTGCAGCGTTATCCGGATTACTGGGTGTAAGGGAGCGTAGACGTTTTGCAAGTCTGAAGTAAAAGCCC  
GGGGCTTAACCCGGGACTGCTTTGAAACTGTAGGACTAGAGTGTGCGGAGGGTAAGTGAATTCCTAGTGTAGCGGTG  
AATGCGTAGATATTAGGAGGAACACCAGTGGCGAAGGCGGCTTACTGGGCTTTACTGACGCTGAGGCACGAAAGCGTG  
GGGAG

>ASV:4618:Genus:Eisenbergiella

TACGGAGGATCCGAGCGTTATCCGGATTACTGGGTGTAAGGGAGCGTAGACGGCATGGCAAGCCAGATGTGAAAACCC  
AGGGCTCAACCTTGGGATTGCATTTGAACTGCCAGGCTGGAGTGCAGGAGAGGTAAGCGGAATTCCTAGTGTAGCGGTG  
AATGCGTAGATATTAGGAGGAACACCAGTGGCGAAGGCGGCTTACTGGACTGTAACGACGTTGAGGCTCGAAAGCGTG  
GGGAG

>ASV:4619:Genus:Parabacteroides

TACGGAGGATCCGAGCGTTATCCGGATTACTGGGTTAAAGGGTGCCTAGGCGGCCCTTTAAGTCAGCGGTGAAAGTCT  
GTGGCTCAACCATAAAATTGCCGTTGAACTGGGTTACTTGTAGTGTGTTTGTAGGTAGGCGGAATGCGTGGTGTAGCGGTG  
AATGCTTAGATATCGGGAAGAACCACCAATGGCGAAGGCGGCTTACTGGACTGTAACGACGTTGAGGCTCGAAAGCGTG  
GGGAG

>ASV:4620:Family:Lachnospiraceae

TACGTAGGGAGCGAGCGTTGTCGGAATTACTGGGTGTAAGGGAGCGTAGGCGGGATCGCAAGTCTGAAGTAAAAGGCA  
TGGGCTCAACCCGGGACTGCATTGAAACTGTCAATCTAGAGTACCGGAGAGGTAAGCGGAATTCCTAGTGTAGCGGTG  
AATGCGTAGATATTAGGAGGAACACCAGTGGCGAAGGCGGCTTACTGGACGTTAAGTACGCTTGTAGGCTCGAAAGCGTG  
GGGAG

>ASV:4621:Class:Bacteroidia

TACGGAGGATCCGAGCGTTATCCGGATTACTGGGTTAAAGGGAGCGTAGGCGGACGCTTAAGTCAGTTGTGAAAGTTT  
GCGGCTCAACCGTAAAATTGCAGTTGATACTGGGTGTCTTGTAGTACCGGAGAGGGTGGCGGAATTCAGGTATAGGAGTG  
AATCCGTAGATATCTGGAGGAACACCAGTGGCGAAGGCGGCCACCTGGACGTTAAGTACGCTTGTAGGTCGAAAGCGTG  
GGTAG

>ASV:4622:Family:Ruminococcaceae

AACGTAGGTCAACAAGCGTTGTCGGAATTACTGGGTGTAAGGGAGCGTAGGCGGGATCGCAAGTCAAGTGTGAAAACCTA  
TGGGCTTAACCCATAAACTGCATTTGAACTGTGGTCTTGTAGTGAAGTAGAGGTAAGCGGAATTCCTGGTGTAGCGGTG  
AATGCGTAGATATCACGAAGAACCAGTGGCGAAGGCGGCTGCTAAGCTGCAACTGACATTGAGGCTCGAAAGTGTG  
GGTAT

>ASV:4623:Phylum:Firmicutes

TACGTATGGTGCAGCGTTATCCGGATTACTGGGTGTAAGGGAGCGCAGGCGGTGCGGCAAGTCTGATGTGAAAAGCCC  
TCGGCTTAACCGAGGAAGTGCATCGGAACTGGGAACTTGTAGTACAGAAGAGGACAGTGGAACTCCCGTGTAGCGGTG  
AATGCGTAGAGATGGGGAGGAACACCAGTGGCGAAGGCGGCTGCTGGGCTTAACTGACGCTGAGGCACGAAAGCGTG  
GGTAG

>ASV:4624:Family:Peptostreptococcaceae

TATGTATGGAGCAAGCGTTATCCGGATTACTGGGTGTAAGGGTGCCTAGGCGGCTTTTTAAGTCAGGAGTAAAAGGCT  
ACGGCTCAACCGTAGTAAGCCTTTGAAACTGGGAACTTGTAGTGCAGGAGAGGAGAGTGGAAATTCCTAGTGTAGCGGTGA  
AATGCGTAGATATCACGAAGAACCAGTGGCGAAGGCGGCTGCTAAGCTGCAACTGACATTGGGGCTCGAAAGTGTGG  
GTATC

>ASV:4625:Family:Lachnospiraceae

TACGTATGGAGCAAGCGTTATCCGGATTACTGGGTGTAAGGGTGCCTAGGCGGCTTTGCAAGTCAAGTGTGAAATCTA  
TGGGCTCAACCCATAAACTGCATTTGAACTGTAAAGCTAGATTGCCGGAGAGGTAAGCGGAATTCCTAGTGTAGCGGTG  
AATGCGTAGATATTAGGAGGAACACCAGTGGCGAAGGCGGCTGCTGGACTGTTACTGACACTGAGGCACGAAAGCGTG  
GGGAG

>ASV:4626:Genus:Phoceia

TACGTAGGGAGCGAGCGTTGTCGGAATTACTGGGTGTAAGGGAGCGTAGGCGGGTCTCAAGTCAAGTGTAAATCTA  
CCGGCTCAACTGGTAGCTGCGTTCAAAGTGGGCTCTTGTAGTGAAGTAGAGGTAGGCGGAATTCCTAGTGTAGCGGTGA  
AATGCGTAGATATTAGGAGGAACACCAGTGGCGAAGGCGGCTGCTGGGCTTTACTGACGCTGAGGCTCGAAAGCGTGG  
GGAGC

>ASV:4627:Family:Burkholderiaceae

TACGTAGGGTGCAGCGTTAATCGGAATTACTGGGCGTAAAGCGTGCAGGCGGTTGTGTAAGACAGATGTGAAATGCC

CGGGCTCAACCTGGGAATTGCATTTGTGACTGCACGGCTAGAGTGTGTCAGAGGGGGGTAGAATTCCACGTGTAGCAGTG  
AAATGCGTAGATATGTGGAGGAATACCGATGGCGAAGGCAGCCCCCTGGGATAACACTGACGCTCATGCACGAAAGCGTG  
GGGAG

>ASV:4628:Family:Saccharimonadaceae

TACGTAGGATCCGAGCGTTATCCGGAGTGACTGGGCGTAAAGAGTTGCGTAGGCGGTTTGTAAAGTGAATAGTGAATCT  
GGTGGCTCAACCATACAGGCTATTATTTCAAACCTGGCAAACCTCGAGAGTGGTAGAGGCTACTGGAATTTCTTGTGTAGGAG  
TGAAATCCGTAGATATAAGAAGGAACACCGATGGCGTAGGCAGGTGACTGGACCATTCTGACGCTAAGGCACGAAAGCG  
TGGGG

>ASV:4629:Genus:Phreatobacter

TACGAAGGGGGCTAGCGTTGTCCGGAATCACTGGGCGTAAAGCGCACGTAGGCGGACCTTTAAGTCAGGGGTGAAAGCCT  
GGAGCTCAACTCCAGAAGCTGCCTTTGATACTGGAGGTCTCGAGTGTGGAAGAGGTTGGTGGAACTGCGAGTGTAGAGGTG  
AAATTCGTAGATATTCGCAAGAACACCAAGTGGCGAAGGCGGCAACTGGTCCATTACTGACGCTGAGGTGCGAAAGCGTG  
GGGAG

>ASV:4630:Family:Lachnospiraceae

TACGTATGGTGAAGCGTTATCCGGATTTACTGGGTGTAAGGGTGCCTAGGTGGCAAGGCAAGTCTGAAGTAAAACCC  
GGGGCTCAACCCCGTACTGCATTGGAACCTGTTTTGCTTGTAGTGCAGGAGAGGTAAGCGGAATTCCTAGTGTAGCGGTG  
AAATGCGTAGATATTAGGAGGAACACCAAGTGGCGAAGGCGGCTGCTGGGCTTTAACTGACGCTGAGGCACGAAAGCGTG  
GGTAG

>ASV:4631:Family:Ruminococcaceae

TACGTAGGTGGCAAGCGTTGTCCGGAGTTACTGGGTGTAAGGGAGCGTAGGCGGGAAGGCAAGTCTGATTGTCTAAACTA  
TGGGCTCAACCCATAGTCGCGATCGAAACTGTCTTTCTTGTAGTGAAGTAGAGGTAAGCGGAATTCCTAGTGTGGCGGTGA  
AATGCGTAGATATTAGGAGGAACACCAAGTGGCGAAGGCGGATTGCTGGACGATAACTGACGCTGAGGCGGAAAGTGTG  
GGAG

>ASV:4632:Family:Lachnospiraceae

TACGTATGGTGAAGCGTTATCCGGATTTACTGGGTGTAAGGGAGCGCAGGCGGTGCGGCAAGTCTGATGTGAAAGCCC  
GGGGCTCAACCCCGGACTGCATTTGGAACCTGCTGAGCTAGAGTGTGCGGAGAGGCAAGTGGAAATTCCTAGTGTAGCGGTG  
AAATGCGTAGATATCACGAAGAAGCTCCGATTGCGAAGGCGAGTCTACTAGACTGTTACTGACACTGATGCTCGAAAGTGTG  
GGTAT

>ASV:4633:Genus:Megamonas

AACGTAGGGTGAAGCGTTGTCCGGAATTTACTGGGTGTAAGGGAGCGCAGGCGGGAACCTAAGCGGATCTTAAAAGTGC  
GGGGCTCAACCCCGTATGGGGTCCGAACCTGGTTTTCTTGTAGTGCAGGAGAGGAAAGCGGAATTCCTAGTGTAGCGGTGG  
AATGCGTAGATATCGGGAGGAACACCAAGTGGCGAAGGCGGCTACTGGGCACCAACTGACGCTGAGGCTCGAAAGTGTG  
GTAGC

>ASV:4634:Genus:Dialister

TACGTAGGTGGCAAGCGTTGTCCGGAATTTACTGGGTGTAAGGGAGCGCAGGCGGCTTCCCAAGTCCCTCTTAAAAGTGC  
GGGGCTTAAACCCCGTATGGGAAGGAACTGGGAAGCTGGAGTATCGGAGAGGAAAGTGGAAATTCCTAGTGTAGCGGTGA  
AATGCGTAGATATACGGAGGAACCAATGGCGAAGGCGAGTCTCTGGGCCCTTACTGACGCTGAGGAGCGAAAGCGTGG  
GGAG

>ASV:4635:Family:Lachnospiraceae

TACGTATGGTGAAGCGTTATCCGGATTTACTGGGTGTAAGGGAGCACAGGCGGTACGGCAAGTCTGATGTGAAAGCCC  
GGGGCTCAACCCCGGACTGCTTTGGAACCTGCAAGTCTAGAGTGCAGGAGAGGTAAGCGGAATTCCTAGTGTAGCGGTG  
AAATGCGTAGATATTAGGAGGAACACCAAGTGGCGAAGGCGGCTTACTGGACGCTGACTGACACTGAGGCTCGAAAGCGTG  
GGGAG

>ASV:4636:Family:Lachnospiraceae

TACGTAGGGGGCAAGCGTTATCCGGATTTACTGGGTGTAAGGGAGCGTAGACGGCATGGCAAGCCAGATGTGAAAGCCC  
GGGGCTCAACCCCGGACTGCATTTGAAACTGTCTAGCTAGAGTGCAGGAGAGGTAAGCGGAATTCCTAGTGTAGCGGTG  
AAATGCGTAGATATTAGGAGGAACACCAAGTGGCGAAGGCGGCTTACTGGACTGTAACCTGACACTGAGGCACGAAAGTGTG  
GGTAT

>ASV:4637:Family:Ruminococcaceae

TACGTAGGTGGCAAGCGTTGTCCGGATTTACTGGGTGTAAGGGCGCGTAGGCGGGCCTGCAAGTCAAGCGTGAATCCC  
GGGGCTTAAACCCGAGGACTGCGGTTGAAACTGTGGGTCTTGTAGTGAAGTAGAGGTAGGCGGAATTCCTAGTGTAGCGGT  
GAAATGCGTAGATATCGGGAGGAACACCAAGTGGCGAAGGCGGCTTACTGGGCTTTAACTGACGCTGAGGCACGAAAGTGT  
GGTA

>ASV:4638:Genus:Collinsella

TACGTAGGGGGCGAGCGTTATCCGGATTTACTGGGTGTAAGGGAGCGTAGGCGGCCCGGCAGGCGGGGGTGAAGCGG  
GGGGCTCAACCCCGAAGCCCGGAACCTCCGCGCTTGGTCCGGTAGGGGAGGTTGGAACACCCGGCGTAGCGGTG  
GAATGCGCAGATATCGGGTGAACACCCGTTGGCGAAGGCGGCTTCTGGGCCGAGACCAGCGTGAAGCGCGAAAGTGTG  
GGGAG

>ASV:4639:Genus:Cuneatibacter

TACGTATGGTGAAGCGTTATCCGGATTTACTGGGTGTAAGGGAGCGTAGGCGGTAAGACAAGTCAAGTGAAGGCT  
GGGGCTCAACCTGGGACTGCTTTTGAACCTGCTAACTAGAGTGCAGGAGAGGTAAGTGGAAATTCCTAGTGTAGCGGTG  
AAATGCTTAGATATCACGAAGAAGCTCCGATTGCGAAGGCGAGTCTACTGGATTGTAACCTGACGCTGATGCTCGAAAGTGTG  
GGTAT

>ASV:4640:Genus:Veillonella

TACGTAGGTGGCAAGCGTTGTCCGGAATTTACTGGGTGTAAGGGAGCGTAGGCGGCTTATCCAGTCTGTCTTAAAAGTTC  
GGGGCTCAACCCCGTATGGGATGGAACCTAGTAGGCTAGAGTATCGGAGAGGAAAGCGGAATTCCTAGTGTAGCGGTGA  
AATGCGTAGATATTAGGAAGAACAAGTGGCGAAGGCGGCTTTCTGGACGAAAACCTGACGCTGAGGCGGAAAGCCAGG  
GGAG

>ASV:4641:Genus:Roseburia  
TACGTAGGGGGCAAGCGTTATCCGGATTTACTGGGTGTAAAGGGAGCGTAGACGGGATAGCAAGTCTGAAGTGAAAGCCC  
GGGGCTCAACTCCGGTACTGCATTGAAACTGTCCGACTAGAGTGTCCGAGGGGTAAAGTGAATTCCCTAGTGTAGCGGTG  
AAATGCGTAGATATTAGGAGGAACACCAAGTGGCGAAGGCGGCTTACTGGACGATAACTGACGCTGAGGCTCGAAAGTGTG  
GGTAT

>ASV:4642:Genus:Acidaminococcus  
TACGTAGGTGGCAAGCGTTGTCCGGAATTATTGGGCGTAAAGAGCATGTAGGCGGGCTTTTAAAGTCTGACGTGAAAATGC  
GGGGCTCAACCCGTATGGCGTTGGATACTGGAGTCTTGTAGTGCAGTTGAGGCAGGCGGAATTCGTGGTGTAGCGGTGA  
AATGCTTAGATATCACGAAGAAGTCCGATTGCGAAGGCGAGCTGCTAAGCTGCAACTGACATTGAGGCTCGAAAGTGTG  
GTATC

>ASV:4643:Family:Ruminococcaceae  
CACGTATGGTCAAGCGTTATCCGGAATTATTGGGCGTAAAGGGCTCGTTGGCGGGAAGATAAGTTGGACGTTTAACTCA  
TCGGCTCAACCTATGTAAAGCATGTTGAAACTGTTTCTTGTAGTGAAGTAGAGTAAGCGGAATTCCTAGTGTAGCGGTGA  
AATGCGTAAATATTAGGAGGAACACCAAGTGGCGAAGGCGGCTTACTGGACGATAACTGACGCTGAGGCTCGAAAGCGTGA  
GGAGC

>ASV:4644:Family:Family\_XI  
TACGTAGGGGGCGAGCGTTGTCCGGAATCACTGGGCGTAAAGGGTTCGAGGCGGATAAGCAAGTCAAAGTAAAAGGCA  
TAGGCTCAACCTATGTAAAGCATGTTGAAACTGTTTCTTGTAGTGAAGTAGAGTAAGCGGAATTCCTAGTGTAGCGGTGA  
AATGCGTAGATATTAGTAGGAATACCAAGTGGCGAAGGCGACTTACCGCCACACACTGACGCTGAGGAACGAAAGCGTGG  
GTAGC

>ASV:4645:Family:Lachnospiraceae  
TACGGAGGATCCAAGCGTTATCCGGAATTTACTGGGTGTAAAGGGAGCGTAGACGGACTGGCAAGTCTGATGTGAAAGGCG  
GGGGCTCAACCCGTGACTGCCTTAATACTGTTGGACTAGAGAATAGTTGCGGTAGGCGGAATTCCTAGTGTAGCGGTG  
AAATGCGTAGATATTAGGAGGAACACCAAGTGGCGAAGGCGAGCTGCTGGACTGTAAGTACTGACACTGAGGCACGAAAGCGTG  
GGGAG

>ASV:4646:Genus:Alistipes  
TACGGAGGATCCAAGCGTTATCCGGAATTTACTGGGTGTAAAGGGTTCGAGGCGGTTTATAAGTTAGAGGTGAAATATT  
AGGGCTCAACCCGTGACTGCCTTAATACTGTTGGACTAGAGAATAGTTGCGGTAGGCGGAATGTATGGTGTAGCGGTG  
AAATGCTTAGAGATCATAAGAACACCGATTGCGAAGGCGAGCTTACCAAATATATCTGACGTTGAGGCACGAAAGCGTG  
GGGAG

>ASV:4647:Order:Clostridiales  
TACGGAGGATCCAAGCGTTATCCGGAATTTACTGGGTGTAAAGGGTTCGAGGCGGTTTATAAGTTAGAGGTGAAATACC  
GGGGCTCAACCCGTGACTGCCTTAATACTGTTGAGCTAGAGTGAAGTAGAGGCGAGGCGGAATTCCTAGTGTAGCGGTG  
AAATGCGTAGATATTAGGAGGAACACCAAGTGGCGAAGGCGGCTTACTGGACAGTAAGTACTGACGTTGAGGCTCGAAAGCGTG  
GGGAG

>ASV:4648:Order:Clostridiales  
TACGTAGGGGGCTAGCGTTATCCGGAATTTACTGGGCGTAAAGGGTTCGAGGCGGTTTATAAGTTAGAGGTGAAAGGCT  
ACGGCTCAACCGTAGTAAGCCTTTGAAACTGGGAACTTGTAGTGCAGGAGAGGAGAGTGAATTCCTAGTGTAGCGGTGA  
AATGCATAGATACCTTGAACCCCGATAGCGAAGGCGAGCTTCCAGGCTCGTTCTGACGCTGATGCGGAGAGCGGTGG  
GTAGC

>ASV:4649:Genus:Prevotella  
TACGGAAGGTCGGGCGTTATCCGGAATTTACTGGGTGTAAAGGGAGCGTAGGCGGCCAGGTAAGCGTGTGTGAAATGTA  
CCGGCTCAACCGGTGAATTGCAGCGCAACTGTCTGGCTTGTAGTGCAGGTAAGCAGGCGGAATTCATGGTGTAGCAGTG  
AAATGCTTAGATATCATGAAGAAGTCCGATTGCGAAGGCGAGCTTGTGACGTCGACTGACGCTGATGCTCGAAAGTGGC  
GGTAT

>ASV:4650:Genus:Haemophilus  
TACGGAGGGTGCAGCGTTAATCCGGAATAACTGGGCGTAAAGGGCACGAGGCGGTGACTTAAAGTGAAGTGTGAAAGCCC  
CGGGCTTAACATGGGAATTGCATTTCACTAGGTCGCTAGAGTACTTTAGGGAGGGGTAGAATTCACGCTGTAGCGGTG  
AAATGCGTAGAGATGTGGAGGAATACCGAAGGCGAAGGCGAGCCCTTGGGAATGTACTGACGCTCATGTGCGAAAGCGTG  
GGGAG

>ASV:4651:Genus:Sneathia  
TACGTATGTCGCGAGCGTTATCCGGAATTTACTGGGCTTAAAGGGCATCTAGGCGGTTAAACAAGTTGAAGGTGAAAACCT  
GTGGCTCAACCATAGGCTTGCCTACAAAAGTATAACTAGAGTACTGGAAAGGTGGGTGGAAGTACACGAGTAGAGGTG  
AAAGTGTAGATATGTGTAGGAATGCCGATGATGAAGATAACTCACTGGACAGCAACTGACGCTGAAGTGCAGAAAGCTAG  
GGGAG

>ASV:4652:Family:Ruminococcaceae  
TACGTAGGGAGCAAGCGTTGTCCGGAATTTACTGGGTGTAAAGGGAGCGTAGGCGGGAATGCAAGTTGAATGTCAAATCTA  
CCGGCTCAACTGGTAGTCGCTTCAAAGTGCCTTCTTGTAGTGAAGTAGAGGCGAGGCGGAATTCCTAGTGTAGCGGTGA  
AATGCGTAGATATTAGGAGGAACACCAAGTGGCGAAGGCGGCTGCTGGGCTTTTACTGACGCTGAGGCTCGAAAGTGTGG  
GTAGC

>ASV:4653:Family:Lachnospiraceae  
AACGTAGGTACAAGCGTTGTCCGGAATTTACTGGGTGTAAAGGGTTCGAGGCGGTTTGAAGTCAAGTGTGAAATCTA  
TGGGCTCAACCATAGCCTGCATTTGAAACTGCCGCTTGTAGTGCAGGAGAGGTAAGCGGAATTCCTAGTGTAGCGGTG  
AAATGCGTAGATATTAGGAGGAACACCAAGTGGCGAAGGCGGCTTACTGGACGTAAGTACTGACGTTGAGGCTCGAAAGCGTG  
GGGAG

>ASV:4654:Family:Christensenellaceae  
TACGTAGGGAGCAAGCGTTGTCCGGAATTTACTGGGCGTAAAGGGTTCGAGGCGGCGAGTGTGAGTCAAGTGAATATC  
GGGGCTTAACCCGGGGCTGCTTCTGATACTGCTGTGCTTGGGTGCAGGAGAGGTAAGCGGAATTCCTAGTGTAGCGGTG

AAATGCGTAGATATTAGGAGGAACACCAGTGGCGAAGGCGGCTTACTGGACTGTAAGTACGCTGAAGCACGAAAGCGTG  
GGTAG  
>ASV:4655:Family:Ruminococcaceae  
TACGTAGGTGGCAAGCGTTGTCGGGAATTACTGGGTGTAAGGGAGCGTAGGCGGGATGCCAAGTCAGCTGTGAAACTA  
TGGGCTTAACCTGTAGACTGCAGTTGAACTGGTATCTTGGAGTGAAGTAGAGGTTGGCGGAATCCGAGTGTAGCGGTG  
AAATGCGTAGATATTAGAAGGAACACCAGTGGCGAAGGCGGTTTCTGGGCCCTTACTGACGCTGAGGCACGAAAGCGTG  
GGGAG  
>ASV:4656:Kingdom:Bacteria  
AACGTAGGTCACAAGCGTTGTCCGGAATTACTGGGTGTAAGGGCGCGTAGGCGGGGATACAAGTCAGATGTGAAATCTA  
TGGGCTTAACCCATAAACTGCATTTGAACTGTATCTCTTGGAGTGTGCGAGAGGTAGACGGAATTCGTGGTGTAGCGGTG  
AAATGCTTAGATATCAGGAAGAACTCCGATTGCGAAGGCAGCTCACTGGACTGCAGCTGACACTGATGCTCGAAAGTGTG  
GGTAT  
>ASV:4657:Genus:Ruminococcaceae\_UCG-005  
AACGTAGGTCACAAGCGTTGTCCGGAATTACTGGGTGTAAGGGAGCGCAGGCGGGAAGACAAGTTGGAAGTGAATCTA  
TGGGCTCAACCCATAAACTGCATTTCAAACCTGTATCCCTTGGAGTATCGGAGAGGCAAGCGGAATTCCTAGTGTAGCGGTG  
AAATGCGTAGATATTAGGAGGAACACCAGTGGCGAAGGCGGCTTCTGGACGACAACGACGCTGAGGCAGGCGAAAGCGTG  
GGGAG  
>ASV:4658:Order:Clostridiales  
TACGGAGGATCCGAGCGTTATCCGGATTTATTGGGTTAAAGGGAGCGTAGGTGGACAGTTAAGTCAGTTGTGAAAGGCT  
ACGGCTCAACCGTAGTAAGCCTTTGAACTGGGAACTTGTAGTGCAGGAGAGGAGAGTGAATTCCTAGTGTAGCGGTGA  
AATGCGTAGAGATCTGGAGGAATACCGGTGGCGAAGGCGGCCCTTGGACGAAGACTGACGCTCAGGTGCGAAAGCGTGG  
GGAGC  
>ASV:4659:Family:Family\_XIII  
TACGTAGGGGCGAGCGTTATCCGGAATTATTGGGCGTAAAGAGTGCCTAGGTGGCACCTTAAGCGCAGGGTTAAGGCA  
ATGGCTCAACCATTTGTCGCCTTGGCAACTGGGGTGTGAGTGCAGGAGGGGAAAGTGAATTCCTAGTGTAGCGGTGA  
AATGCGTAGATATTAGGAGGAACACCAGTGGCGAAGGCGGCTTACTGGACGATCACTGACGTTGAGGCTCGAAAGCGTG  
GGAGC  
>ASV:4660:Family:0319-6G20  
TACAGAGGGTGAAGCGTTGTTCCGGAATTACTGGGCGTAAAGCGTGCCTAGTGCCTATTGAGAGTCACGGGTGAAATCCC  
AGGGCTTAACCTGGAAGTGCCTGTGAGACCTCAGTACTAGAGTGTGAGAGGGGATAGTGAATACCCAGTGTAGCGGTG  
AAATGCGTAGAGATTGGGTGGAACACCAGTGGCGAAGGCGGCTATCTGGCTCACAACGACGATCAGGCACGAAAGCGTG  
GGGAG  
>ASV:4661:Order:Clostridiales  
TACGGAGGATCCGAGCGTTATCCGGATTTATTGGGTTAAAGGGAGCGTAGGCGGGTGTAAAGTCAGAGGTGAAAGGCT  
ACGGCTCAACCGTAGTAAGCCTTTGAACTGGGAACTTGTAGTGCAGGAGAGGAGAGTGAATTCCTAGTGTAGCGGTGA  
AATGCGTAGATATTAGGAGGAACACCAGTGGCGAAGGCGCCTTCTGGACTGTGCTGACGCTGAGATGCGAAAGCCAGG  
GTAGC  
>ASV:4662:Family:Lachnospiraceae  
TACGGAGGATCCGAGCGTTATCCGGATTTATTGGGTGTAAGGGAGCGTAGGTGGCAGTGAAGTCAGATGTGAAAACCC  
GGGGCTCAACCCCGGACTGCATTTGAACTGTCCGACTTGTAGTGCAGGAGAGGAGAGTGAATTCCTAGTGTAGCGGTG  
AAATGCGTAGATATTAGGAAGAACACCAGTGGCGAAGGCGGCTTACTGGACGGTAACGACGTTGAGGCTCGAAAGCGTG  
GGGAG  
>ASV:4663:Genus:Lachnospiraceae\_UCG-001  
TCCTTCTTTTCCCTCTTCTCCTTCTTCTGGGTGTAAGGGAGCGCAGGCGGTGCGGCAAGTCAGATGTGAAAACCC  
GGGGCTCAACCCCGGACTGCATTTGAACTGTCCGACTTGTAGTGCAGGAGAGGTAAGTGAATTCCTAGTGTAGCGGTG  
AAATGCGTAGATATTAGGAGGAACACCAGTGGCGAAGGCGGCTTACTGGACGGTAACGACGCTGAGGCTCGAAAGCGTG  
GGGAG  
>ASV:4664:Family:Mitochondria  
GACGGGGGGGCAAGTGTCTTCCGGAATGACTGGGCGTAAAGGGCACGTAGGCGGTGAATCGGGTTGAAAGTGAAGTGC  
CCAAAACCTGGCGGAATGCTCTCGAAACCAATCACTTGTAGTGCAGGAGAGGAGTGAATTCCTAGTGTAGGGGTGAA  
ATCCATAGATCTACGAAGGAACGCCAAAAGCGAAGGCAGCTCTCTGGTCCCTACCGACGCTGGGGTGCAAAGCATGGG  
GAGCG  
>ASV:4665:Genus:Dialister  
TACGTAGGTGGCAAGCGTTGTCCGGAATTATTGGGCGTAAAGCGCGCAGGCGGCTTCCCAAGTCCCTCTTAAAAGTGC  
GGGGCTTAACCCCGTGTAGGGAAGGAACTGGGAACTGGAGTATCGGAGAGGAAAGTGAATTCACGCTGTAGCAGTGA  
AATGCGTAAATATGTGGAAGAACACCAGTGGCGAAGGCGGCTTCTGGGACATGACTGACGCTCATGCACGAAAGCGTGG  
GGAGC  
>ASV:4666:Genus:Christensenella  
TACGTAGGGAGCAAGCGTTGTCCGGAATTACTGGGCGTAAAGGGTGCCTAGGTGGTCAATGTAAGTCAGATGTGAAAGACC  
GGGGCTTAACCCCGGGTGTGATTTGAACTGTGTGACTTGTAGTACAGGAGAGGAAAGTGAATTCCTAGTGTAGCGGTG  
AAATGCGTAGATATTAGGAGGAACACCAGTGGCGAAGGCGGATTGCTGGGCTGTAACGACGCTGAGGTACGAAAGCGTG  
GGTAG  
>ASV:4667:Genus:Christensenellaceae\_R-7\_group  
TACGTAGGGGCAAGCGTTGTCCGGAATGATTGGGCGTAAAGGGCGCGTAGGCGGCCTGGTAAGTTTGAAGTGAAGTCC  
TTCTTTTAAAGGAGGAACTGCTTTGAAACCTGTCCGGCTTGTAGTGCAGGAGAGGTAAGCGGAATTCCTGGTGTAGCGGTG  
AAATGCGTAGAGATCGAGAGGAACACCAGTGGCGAAGGCGGATTGCTGGACGACAACGACGTTGAGGCGCGAAAGCGTG  
GGGAG  
>ASV:4668:Genus:Butyricimonas



TACGGGGGATGCGAGCGTTATTCGGATTTATTGGGTTTAAAGGGCGCTAGGCGGGACGCCAAGTCAGCGGTAAAAGACT  
GCAGCTAAACTGTAGCACGCCGTTGAAACTGGCGACCTGGAGACGAGACGAGGGAGGCGGAACAAGTGAAGTAGCGGTGA  
AATGCTTAGATATCACTTGGAAACCCGATAGCGAAGGCAGCTTCCCAGGCTCGATCTGACGCTGATGCGCGAGAGCGTGG  
GTAGC

>ASV:4669:Genus:Erysipelatoclostridium

TACGTAGGTGGCGAGCGTTATCCGGAATTATTGGGCTGTAAGAGGGAGCAGGCGGGCAGAGGTCTGTGGTAAAAGACT  
GAAGCTTAACTTCAAGCCATAGAAACCGGGCTGCTAGAGTGCAGGAGAGGATCGTGAATTCCATGTGTAGCGGTGA  
AATGCGTAGATATATGGAGGAACACCAGTGGCGAAGGCGGCTACTGGGCACCAACTGACGCTGAGGCTCGAAAAGTGTGG  
GTAGC

>ASV:4670:Family:Lachnospiraceae

TACGTAGGGAGCGAGCGTTGTCCGGAATTACTGGGTGTAAGGGAGCGCAGGCGGTGCGGCAAGTCAGATGTGAAAACCC  
GGGGCTCAACCTCGGGACTGCATTTGAAACTGTCGGACTAGAGTGCCGGAGAGGTAAGTGAATTCCATGTGTAGCGGTG  
AAATGCTTAGATATCACGAAGAACTCCGATTGCGAAGGCAGCTGCTGGACTGTAACGACGCTGATGCTCGAAAAGTGTG  
GGTAT

>ASV:4671:Genus:Paraprevotella

TACGGAGGATCCGAGCGTTATCCGATTTATTGGGTTTAAAGGGAGCGTAGGTGGATTGTTAAGTCAGTTGTGAAAAGTTC  
GCGGCTCAACCGTGGCCAGCCGTTGAAACTGCAAGCCTTGTAGTCTGCACAGGGCACATGGAATTCGTGGTGTAGCGGTGA  
AATGCTTAGATATCACGAAGAACTCCGATCGCGAAGGCATTGTGCCGGGCATAACTGACGCTGAGGCTCGAAAAGTGTGG  
GTATC

>ASV:4672:Genus:Ralstonia

TACGTAGGGTCCAAGCGTTAATCCGGAATTACTGGGCGTAAAGCGTGCAGGCGGTTGTGCAAGACCGATGTGGAATCCC  
CGGGCTTAACTGGGAATTGCATTGGTGACTGCACGGCTAGAGTGTGTCAGAGGGGGTGAATTCACGCTGTAGCAGTG  
AAATGCGTAGAGATGTGGAGGAATACCGATGGCGAAGGCAGCCCCCTGGGATAACACTGACGCTCATGCACGAAAGCGTG  
GGGAG

>ASV:4673:Genus:Christensenellaceae\_R-7\_group

TACGTAGGGGGCGAGCGTTGTCCGGAATTACTGGGCGTAAAGGGTGCCTAGGCGGTTGCTTAAAGTTGGATGTGAAATACC  
CGGGCTTAACTGGGGGGTGCATTCAAAACCTGGGCGACTAGAGTTACAGGAGAGGGAAGCGGAATTCCTAGTGTAGCGGTG  
AAATGCGTAGATATCGGGAGGAACACCAGTGGCGAAGGCAGCTAACTGGACTGTAACGACGCTGAGGCGCGAAAGCGTG  
GGGAG

>ASV:4674:Family:Christensenellaceae

TACGTAGGGAGCAAGCGTTATCCGGAATTACTGGGCGTAAAGGGTGCCTAGGCGGTTTGATAAGTCAGATGTGAAATATT  
CGGGCTTAACTGGAGGGTGCATTTGAAACTGTCAGACTTGTAGTGAGGAGAGGAAAGCGGAATTCCTAGTGTAGCGGTG  
AAATGCGTAGATATTAGGAGGAACACCAGTGGCGAAGGCAGCTTCTGGACTGTAACGACGCTGAGGCGCGAAAGTGTG  
GGGAG

>ASV:4675:Genus:Christensenellaceae\_R-7\_group

TACGTATGGTCAAGCGTTATCCGATTTACTGGGCGTAAAGGGCGCGTAGGCGGCTGTGTAAGTCTGGAGTGAAAGTCC  
TGCTTTTAAAGTGGGAATTGCTTTGGAAGACTGCATGGCTTGTAGTGCGGAGAGGCAAGTGAATTCCTAGTGTAGCGGTG  
AAATGCGTAGAGATTGGAAGAACACCAGTGGCGAAGGCAGCTTGTGGCCGTAACGACGCTGAGGCGCGAAAGCGTG  
GGGAG

>ASV:4676:Family:Ruminococcaceae

TACGTAGGTGGCAAGCGTTGTCCGATTTACTGGGTGTAAGGGCGCGTAGGCGGGACGGCAAGTCAGATGTGAAATCCA  
TGGGCTCAACCCATGAAGTGCATTTGAAACCGTCTGTTCTTGTAGTGCAGGAGAGGCAAGCGGAATTCCTAGTGTAGCGGTG  
AAATGCGTAGATATGACGCAGAACTCCGATTGCGAAGGCAGCATACCAACTCGGACTGACGCTGAGGCTCGAAAGCGTG  
GGTAT

>ASV:4677:Family:Ruminococcaceae

AACGTAGGTCAAGCGTTGTCCGGAATTACTGGGTGTAAGGGAGCGCAGGCGGGAAGACAAGTTGGAAGTGAATCTA  
TGGGCTCAACCCATAAAGTGCATTTGAAACTGTTTTTCTTGTAGTGAAGTAGAGGCAAGCGGAATTCCTAGTGTAGCGGTG  
AAATGCGTAGATATTAGGAGGAACACCAGTGGCGAAGGCAGCTTGTGGGCTTTACTGACGCTGAGGCTCGAAAGTGTG  
GGGAG

>ASV:4678:Family:Ruminococcaceae

TACGTAGGTGGCAAGCGTTGTCCGGAATTACTGGGTGTAAGGGCGGTAGGCGGGACTTTAAGTCAGATGTGAAATACC  
CGGGCTTAACTCGGGAGGTGCATTTGAAACTGAGTTCTTGTAGTGCAGGAGAGGAAAGCGGAATTCCTAGTGTAGCGGTG  
AAATGCGTAGATATTAGGAGGAACACCAGTGGCGAAGGCAGCTACTGGGCACCAACTGACGCTGAGGCTCGAAAGCATG  
GGTAG

>ASV:4679:Family:Lachnospiraceae

TACGTAGGGGGCAAGCGTTATCCGATTTACTGGGTGTAAGGGAGCGCAGGCGGCATGATAAGTCTGATGTGAAAACCC  
AAGGCTCAACCATGGGACTGCTTTGAAACTGTCGTGCTGGAGTGTGCGAGAGGTAAGCGGAATTCCTAGTGTAGCGGTG  
AAATGCGTAGATATTAGGAGGAACACCAGTGGCGAAGGCAGCTTACTGGGCACCAACTGACGCTGAGGCTCGAAAGTGTG  
GGTAG

>ASV:4680:Genus:Butyricimonas

TACGGGGGATGCGAGCGTTATCCGATTTATTGGGTTTAAAGGGCGCTAGGCGGGACGCCAAGTCAGCGGTAAAAGACT  
GCAGCTAAACTGTAGCACGCCGTTGAAACTGGCGACCTGGAGACGAGACGAGGGAGGCGGAACAAGTGAAGTAGCGGTGG  
AATGCATAGATATCGGGAGGAACACCAGTGGCGAAGGCGGCTACTGGGCACCAACTGACGCTGAGGCTCGAAAGTGTGG  
GTAGC

>ASV:4681:Genus:Angelakisella

TACGTAGGGAGCGAGCGTTGTCCGGAATTACTGGGTGTAAGGGAGCGTAGGCGGGAAGGCAAGTTGGATGTGAAAAGTTC  
TGGGCTCAACCGACAGACTGCATTCAAAACCTGTTTTTCTTGTAGTGAAGTAGAGGCAAGCGGAATTCCTAGTGTAGCGGTG  
AAATGCTTAGATATCACGAAGAACTCCGATTACGAAGGCAGCTGCTAAGCTGCAACTGACATTGAGGCTCGAAAGTGTG

GGTAT  
>ASV:4682:Family:Lachnospiraceae  
TACGTAGGGGGCAAGCGTTATCCGGATTTACTGGGTGTAAGGGGAGGTAGGTGGCCATGCAAGTCAGAAGTAAAAATCC  
GGGGCTCAACCCCGAACTGCTTTTAAACTGTAAGGCTAGAGTGCAGGAGGGGTGAGTGGAATTCCTAGTGTAGCGGTG  
AATGCGTAGATATTAGGAGGAACACCAGTGGCGAAGGCGGTCTACTGGCACCAACTGACGCTGAGGCTCGAAAGCATG  
GGTAG  
>ASV:4683:Genus:Bacteroides  
TACGTAGGGAGCGAGCGTTGTCCGGAATTACTGGGTGTAAGGGGAGCGTAGATGGGTTGTTAAGTCAGTTGTGAAAGTTT  
GCGGCTCAACCGTAAAATTGCAAGTTGAAACTGGCAGTCTTGAAGTACAGTAGAGGTGGCGGAATTCGTGGTGTAGCGGTG  
AATGCTTAGATATCACGAAGAAGTCCGATTGCGAAGGCGAGTCTACTAACCTGTAAGTACGCTGATGCTCGAAAGTGTG  
GGTAT  
>ASV:4684:Class:Bacteroidia  
TACGGAGGATCCGAGCGTTATCCGGATTTATTGGGTTTAAAGGGAGCGTAGATGGATGTTTAAAGTCAGTTGTGAAAGTTT  
GCGGCTCAACCGTAAAATTGCAAGTTGATACTGGATATCTTGAAGTGCAGAAAGGGAGAGTGGAATTCATGCGTAGCGGTG  
AATGCGTAGATATATGGAGGAACACCAGTGGCGAAGGCGGCTTTCTGGACGACAAGTACGCTGAGGCGCGAAAGTGTG  
GGGAG  
>ASV:4685:Family:Peptostreptococcaceae  
TACGTAGGGGGCTAGCGTTATCCGGAATTACTGGGCGTAAAGGGTGCAGTAGGTGGTTTCTTAAAGTCAGAGGTGAAAGGCT  
ACGGCTCAACCGTAGTAAGCCTTTGAAACTGGGAACTTGAAGTGCAGGAGAGGAGAGTGGAATTCCTAGTGTAGCGGTGA  
AATGCGTAGATATCGGAAGAAGTCCGATTGCGAAGGCGAGCTGCTAAGCTGCAACTGACATTGAGGCTCGAAAGTGTGG  
GTATC  
>ASV:4686:Genus:Veillonella  
TACGTAGGTGGCAAGCGTTGTCCGGAATTATTGGGCGTAAAGCGCGCGCAGGCGGATCAGTTAGTCTGTCTTAAAAGTTT  
GGGGCTTAAACCCGATGGGATGGAAGTCTGATCTAGAGTATCGGAGAGGAAAGTGGAAATTCCTAGTGTAGCGGTGA  
AATGCTTAGATATCACGAAGAAGTCCGATTGCGAAGGCGAGCTACTAGACTGCAACTGACACTGATGCTCGAAAGTGTGG  
GTATC  
>ASV:4687:Phylum:Firmicutes  
TACGTAGGTGGCAAGCGTTGTCCGGAATTATTGGGCGTAAAGCGCGCGCAGGCGGCTTCCCAAGTCCCTCTTAAAAGTGC  
GGGGCTTAAACCCGATGGGAAGGAACTGGCAGTCTTGAAGTGCAGTAGAGGTGGCGGAATTCGTGGTGTAGCGGTGA  
AATGCTTAGATATCACGAAGAAGTCCGATTGCGAAGGCGAGCTACTGGACTGCAACTGACACTGAGGCGCGAAAGCGTGG  
GGAGC  
>ASV:4688:Genus:Prevotella  
TACGGAAGGTCCGGGCTTATCCGGATTTATTGGGTTTAAAGGGAGCGTAGGCTGTCTATTAAGCGTGTGTGAAATTTA  
CCGGCTCAACCGGTGGCTTGCAGCGCAACTGGTGCAGTCTGAGTATGCAGGAAGTAGGCGGAATTCATGGTGTAGCGGTG  
AATGCTTAGATATCATGACGAAGTCCGATTGCGCAGGCGAGTCTACTGTAGCATAACTGACGCTGATGCTCGAAAGTGTGG  
GGTAT  
>ASV:4689:Genus:Anaerotruncus  
TACGTAGGTGGCAGCGTTATCCGGAATCATTGGGTGTAAGGGGAGCGTAGGCGGGATGGCAAGTAGAATGTTAAATCCA  
TCGGCTCAACCGGTGGCTGCTTCAAAGTCCGTTCTTGAAGTGCAGTAGAGGCGAGGCGGAATTCCTAGTGTAGCGGTGA  
AATGCGTAGATATCACGAAGAAGTCCGATTGCGAAGGCGAGCTTCTGACTGTAAGTACGCTGATGCTCGAAAGTGTGG  
GTATC  
>ASV:4690:Family:Ruminococcaceae  
TACGTAGGGAGCGAGCGTTGTCCGGAATTACTGGGTGTAAGGGGAGCGTAGGCGGGGACGCAAGTTGGATGTGAAATCTA  
CCGGCTCAGCTGGTAGCTGCATTCAAAGTGCAGTCTTGAAGTGCAGTAGAGGCGAGGCGGAATTCCTAGTGTAGCGGTGA  
AATGCGTAGATATTAGGAGGAACACCAGTGGCGAAGGCGGCTTCTGGGCTTTTACTGACGCTGAGGCTCGAAAGTGTGG  
GGAGC  
>ASV:4691:Genus:Lachnospiraceae\_UCG-010  
TACGTAGGGAGCGAGCGTTATCCGGATTTATTGGGTGTAAGGGTGAAGTGGCGCATGACAAGTAAGATGTGAAAGCCC  
GTGGCTTAAACCGGATTGCAATTTAAACTGTTGAGCTAGAGTACAGGAGAGGAAAGCGGAATTCCTAGTGTAGCGGTG  
AATGCGTAGATATTGGGAAGAACACCAGTGGCGAAGGCGGCTTTCTGGACTGAAACTGACGCTGAGGCTCGAAAGCGTGG  
GGAG  
>ASV:4692:Genus:Ruminococcus\_2  
TACGTAGGGAGCAAGCGTTATCCGGATTTACTGGGTGTAAGGGTGCAGTAGGCGGCTTGGTAAGTCAGATGTGAAATGTA  
TGGGCTCAACCCATGCACTGCATTTGAAACTATTGAGCTTGAAGTGAAGTAGAGGTAGGCGGAATTCCTGTGTAGCGGTG  
AATGCTTAGATATCACGAAGAAGTCCGATTGCGAAGGCGAGTCTGACTGTAAGTACGCTGATGCTCGAAAGTGTG  
GGTAT  
>ASV:4693:Family:Lachnospiraceae  
AACGTAGGGTGAAGCGTTGTCCGGAATTACTGGGTGTAAGGGGAGCGTAGACGGAGTGGCAAGTCTGATGTGAAAACCC  
GGGGCTCAACCCGGGACTGCATTTGAAACTGCTGAGCTAGAGTGTGGAGAGGCAAGTGGAAATTCCTGGTGTAGCGGTG  
GAATGCGTAGATATCGGAGGAACACCAGTGGCGAAGGCGGTCTACTGGCACCAACTGACGCTGAGGCTCGAAAGCATG  
GGTAG  
>ASV:4694:Family:Ruminococcaceae  
TACGTAGGTGGCAAGCGTTGTCCGGAATTACTGGGTGTAAGGGGAGCGTAGGCGGGAAGGCAAGTGCATTGTCTAAACTA  
TGGGCTTAACTCATAGTCGCGATCGAAACTGCTTTTCTTGAAGTGAAGTAGAGGTAAGCGGAATTCCTAGTGTAGCGGTGA  
AATGCGTAAATATTAGGAGGAACACCAGTGGCGAAGGCGGCTTACTGGGCTTTAACTGACGCTGAGGCTCGAAAGCGTGG  
GTAGC  
>ASV:4695:Genus:Anaerotruncus  
TACGTAGGGAGCAAGCGTTGTCCGGAATTACTGGGTGTAAGGGGAGCGTAGGCGGGATGGCAAGTAGAATGTTAAATCCA



>ASV:4709:Family:Ruminococcaceae  
TACGTAGGTGGCAAGCGTTGTCCGGATTTACTGGGTGTAAAGGGCGTGTAGGCGGGAGAGCAAGTCAGAAGTAAATCTA  
TGGGCTTAACCCATAAACTGCTTTTAAAAGTGTCTCTTGTAGTATCGGAGAGGCAGGCGGAATTCGTGGTGTAGCGGTG  
AAATGCTTAGATATCACGAAGAAGCTCCGATTGCGAAGGCAGCTTGTGACTGTAAGTACGCTGATGCTCGAAAGTGTG  
GGTAT

>ASV:4710:Family:Lachnospiraceae  
TACGTATGGAGCAAGCGTTATCCGGATTTACTGGGTGTAAAGGGTGCCTAGGTGGCAGTGAAGTCAGATGTGAAAGGCC  
GGGGCTCAACCCCGGAGCTGCTTTGAAACTGCATAGCTGGAGTACAGGAGAGGCAGGCGGAATTCCTAGTGTAGCGGTG  
AAATGCTTAGATATCACGAAGAAGCTCCGATTGCGAAGGCAGCTTGTAAAAGTGAAGTACGCTTATGCTCGAAAGTGTG  
GGTAT

>ASV:4711:Family:Lachnospiraceae  
TACGTAGGGGGCAAGCGTTATCCGGATTTACTGGGTGTAAAGGGAGCGCAGACGGCACTGCAAGTCTGAAGTGAAGGCC  
GGGGCTCAACCCCGGAGCTGCTTTGAAACTGTAGAGTGTCTGGAGAGGCAAGCGGAATTCCTAGTGTAGCGGTG  
AAATGCTTAGATATTTAGGAAGAAGCTCCGACTGCGAAGGCAGCATACCAACTCGCAGTACGCTGAGGCTCGAAAGCGTG  
GGTAT

>ASV:4712:Kingdom:Bacteria  
TACGTAGGGGGCGAGCGTTATCCGGATTTACTGGGTGTAAAGGGTGCCTAGGCGGCAACGTAAGTCTGTTGTGAAAGGTG  
ATGGCTTAACCCAGCGAAGTGAATGAAACTGCGGAGCTAGAGTGCAGGAGAGGAAAGCGGAATTCCTAGTGTAGCGGTG  
AAATGCTTAGATATCACGAAGAAGCTCCGATTGCGAAGGCAGCTACTGGAGCGCAACTGACGCTGAAGTCTCGAAAGTGTG  
GGTAT

>ASV:4713:Genus:Butyricimonas  
TACGTATGGTGAAGCGTTATCCGGATTTATTGGGTTTAAAGGGCGCTAGGCGGGACGACAAGTCAGCGGTAAAAGACT  
GCAGCTAAAAGTGTAGCACGCCGTTGAAACTGTGCACCTGGAGACGAGACGAGGGAGGCGGAACAAGTGAAGTGTAGCGGTG  
AATGCGTAGAGATGGGAGGAACACCAGTGGCGAAGGCAGCTGCTGGGCTTAACTGACGCTGAGGCACGAAAGCGTGG  
GTAGC

>ASV:4714:Family:Ruminococcaceae  
TACGTAGGTGGCGAGCGTTATCCGGATTTACTGGGTGTAAAGGGTGTGTAGGCGGGCAACAAGTCAGATGTGAAAACCTA  
TGGGCTCAACCCATAAATTGCTTTCAAAGTGTGCACCTGGAGTGCAGAGGTAGTGAAGTGAAGTGTAGCGGTG  
GAATGCTTAGATATCGGGAGGAACACCAGTGGCGAAGGCAGCTTACTGGACTGCTACTGACACTGAGGCACGAAAGCGTG  
GGGAG

>ASV:4715:Genus:Family\_XIII\_UCG-001  
TACGTAGGGGGCGAGCGTTGTCCGGATTTATTGGGCGTAAAGAGTACGTAGGCGGTTTGTCTAAGCGCAAGTGAAGGCA  
GTGGCTTAACCCATTGTAAAGCCTTGCGAACTGACAGACTTGTAGTGCAGAGGTAGTGAAGTGAAGTGTAGCGGTG  
AATGCGTAGATATCGGGAGGAACACCAGTGGCGAAGGCAGCTTACTGGGACCAACTGACGCTGAGGCTCGAAAGTGTGG  
GTAGC

>ASV:4716:Genus:Ruminiclostridium\_9  
TACGTAGGGAGCAAGCGTTATCCGGATTTACTGGGTGTAAAGGGCGTGTAGGCGGGACTGCAAGTCAGATGTGAAAACCTA  
TGGGCTTAACCCATAGCCTGCAATTTGAAACTGTAGTCTTGTAGTGGTGGAGAGGCAATGGAATTCCTAGTGTAGCGGTG  
AAATGCTTAGATATTTAGGAAGAACACCAGTGGCGAAGGCAGCTTGTGACTGACTAAGTACGCTGAGACACGAAAGCGTG  
GGGAG

>ASV:4717:Genus:Dialister  
TACGTAGGTGGCAAGCGTTGTCCGGATTTATTGGGCGTAAAGCGCGCAGGCGGCTTCCCAAGTCCCTCTTAAAAGTGC  
GGGGCTTAACCCCGTGTAGGGAAGGAAACTGGGAAGCTGGAGTATCGGAGAGGAAAGTGAAGTTCCTAGCGTAGCGGTGA  
AATGCGTAGAGATTAGGAAGAACACCAGTGGCGAAGGCAGCTTCTGGACGAAAAGTACGCTGAGGCGCGAAAGCGTGG  
GGAGC

>ASV:4718:Genus:Caproiciproducens  
TACGTAGGGAGCGAGCGTTGTCCGGATTTACTGGGTGTAAAGGGTGCCTAGGCGGCCATGCAAGTCAGTGTGAAAACCC  
GGGGCTTAACCCCGGACTGCATTTGAAACTGTGTGGCTTGTAGTGAAGTGAAGGTAGGCGGGAATTCCTAGCGTAGCGGTG  
AAATGCTTAGAGATCGGGAGGAACACCAGTGGCGAAGGCAGCTTGTGGGCTTAACTGACGCTGAGGCACGAAAGCATG  
GGTAG

>ASV:4719:Family:Fusobacteriaceae  
TACGTAGGGGGCAAGCGTTATCCGGATTTACTGGGCGTAAAGGGAGCGTAGACGGACTGGCAAGTCTGATGTGAAAACCC  
GGGGCTCAACCCCGGACTGCATTTGAAACTGTGAGTGTAGAGTGAAGTGAAGGTAGGCGGAACTACAAGTGTAGAGGTG  
AAATGCTTAGATATTTGTAGGAATGCCGATGGGAAGCCAGCCTACTGGACAGATACTGACGCTAAAGCGCGAAAGCGTG  
GGTAG

>ASV:4720:Kingdom:Bacteria  
TACGGAGGATGCGAGCGTTATCCGGATTTATTGGGTTTAAAGGGTGCCTAGGTGGTATGGCAAGTCAGAAGTAAAACCC  
AGGGCTTAACCTCGGACTGCTTTTAAAAGTGTGACTGGAGTGAAGTGAAGGTAGGCGGGAATTCCTAGCGTAGCGGTG  
AAATGCTTAGAGATCGGGAGGAACACCAGTGGCGAAGGCAGCTTACTGGGCTTAACTGACGCTGAGGCACGAAAGTGTG  
GGTAG

>ASV:4721:Genus:Eggerthella  
TACGTAGGTGGCAAGCGTTATCCGGATTTACTGGGCGTAAAGAGCGCGTAGGCGGCCTCTCAAGCGGGATCTCTAATCCG  
AGGGCTCAACCCCGGCGGATCCCGAACTGGGAGGCTCGAGTTCGGTAGAGGCAGGCGGAATTCCTAGCGTAGCGGTG  
AATGCGTAGATATCGGGAGGAACACCAGTGGCGAAGGCAGCTTACTGGGACCAACTGACGCTGAGGCTCGAAAGTGTGG  
GTAGC

>ASV:4722:Genus:Prevotella\_9  
TACGGAAAGTCCGGGCGTTATCCGGATTTATTGGGTTTAAAGGGAGCGTAGGCGGAGATTAAGCGTGTGTGAAATGTA  
GACGCTCAACGCTGCACTGCAGCGCAACTGGTTTCTTGTAGTACGCACAAAGTGGGCGGAATTCGTGGTGTAGCGGTG

AAATGCTTAGATATCACGAAGAACTCCGATTGCGAAGCAGCTCACTGGAGCGTAACTGACGCTGATGCTCGAAAGTGTG  
GGTAT  
>ASV:4723:Genus:Leuconostoc  
TACGTATGTCCCGAGCGTTATCCGGATTTATTGGGCGTAAAGCGAGCGCAGCGTTGATTAAGTCTGATGTGAAAGCCC  
GGAGCTCAACTCCGAAAGGCATTGAAACTGGTCAACTGAGTGCAGTAGAGGTAAGTGGAACTCCATGTGTAGCGGTG  
GAATGCGTAGATATATGGAAGAACCACGAGCGCGAAGGCGGTTACTGGACTGTAAGTACGCTTGAGGCTCGAAAGTGTG  
GGTAT  
>ASV:4724:Genus:Anaerofilum  
AACGTAGGTGGCAAGCGTTGTCCGGAATTACTGGGTGTAAGGGAGCGCAGGCGGAAGTCAAGTTGGATGTCAAATCTA  
CGGGCTCAACCCGTATACGCATTCAAACACTGCGGTTCTTGTAGTAGTGCAGAGGTAGGCGGAATTCGTGGTGTAGCGGTGA  
AATGCTTAGATATCACGAAGAACTCCGATTGCGAAGGCGAGCTCACTAGACTGCAACTGACACTGATGCTCGAAAGTGTG  
GTATC  
>ASV:4725:Genus:Anaerotruncus  
TACGTAGGGAGCGAGCGTTGTCCGGAATTACTGGGTGTAAGGGAGCGTAGGCGGGATGGCAAGTTGGATGTTAAACTA  
ACGGCTCAACTGTTAGTGCATCCAAAACACTGCTGTTCTTGTAGTGAAGTAGAGGCGAGGCGGAATTCCTAGTGTAGCGGTGA  
AATGCGTAGATATTAGGAGGAACACCAGTGGCGAAGGCGGTTACTGGACGGTAACTGACGTTGAGGCTCGAAAGCGTGG  
GGAGC  
>ASV:4726:Genus:Erysipelatoclostridium  
AACGTAGGTGGCAAGCGTTATCCGGAATTATTGGGCGTAAAGAGGAGCAGGCGGCAGCAAGGGTCTGTGGTGAAGCCT  
GAAGCTTAACCTCAGTAAGCCATAGAAACCAGGCGAGTGTAGTGCAGGAGAGGATCGTGGAAATTCCTAGTGTAGCGGTGA  
AATGCGTAGATATTAGGAAGAACCACAGTGGCGAAGGCGGTTACTGGACGGTAACTGACGTTGAGGCTCGAAAGCGTGG  
GGAGC  
>ASV:4727:Class:Actinobacteria  
TACGTAGGGCGCAGCGTTGTCCGATTTATTGGGCGTAAAGAGCTCGTAGGCGGTTTGTCCGCTGTCGCGTGAATTTCT  
CTGGCTTAACCTGGAGCGTGCAGTGGGTACGGGCGAGCTGGAGTGCAGTGGGGAGACTGGAATTCCTGGTGTAGCGGTG  
GAATGCGCAGATATCAGGAGGAACACCAGTGGCGAAGGCGGTTCTCTGGCCGTTACTGACGCTGAGGAGCGAAAGCATG  
GGGAG  
>ASV:4728:Family:Ruminococcaceae  
TACGGAGGATCCGAGCGTTATCCGATTTATTGGGTTAAAGGGAGCGTAGGCGGGACAGCAAGTTGAATGTGAAATCTA  
TGGGCTCAACCCATAAACTGCCTTCAAACACTGTTGTTCTTGTAGTGAAGTAGAGGTAGGCGGAATTCCTAGTGTAGCGGTG  
AAATGCGTAGATATTAGGAGGAACACCAGTGGCGAAGGCGGCTACTGGGCTTAACTGACGCTGAGGCTCGAAAGCGTG  
GGTAG  
>ASV:4729:Genus:Butyricicoccus  
TACGGAAGGTCGGGCGTTATCCGATTTACTGGGTGTAAGGGCGCGCAGGCGGGCCGTAAGTTGGAAGTGAATCTA  
TGGGCTTAACCCATAAACTGCCTTCAAACACTGCTGTTCTTGTAGTGTAGGAGGCGAGGCGGAATTCCTGTGTAGCGGTG  
AAATGCGTAGATATCAGGAGGAACACCAGTGGCGAAGGCGAGCTCACTGGAGCGCAACTGACGCTGAAGTCTCGAAAGTGG  
GGTAT  
>ASV:4730:Species:anophelis/cremeus  
TACGTAGGGTGCAGCGTTGTCCGGAATTATTGGGCGTAAAGGGCTTGTAGGCGGTTTGTCCGCTGCTGCTGTGAAAATCC  
GAGGCTCAACCTCGGACTTGCAGTGGGTACGGGCGAGCTAGAGTGTGGTAGGGGAGACTGGAATTCCTGGTGTAGCGGTG  
AAATGCGCAGATATCAGGAGGAACACCAGTGGCGAAGGCGAGTCTCTGGGCCACTACTGACGCTGAGAAGCGAAAGCATG  
GGGAG  
>ASV:4731:Family:Lachnospiraceae  
TACGTAGGGGGCAAGCGTTATCCGATTTACTGGGTGTAAGGGAGCGTAGACGGCGCAGCAAGTCTGATGTGAAAGGCA  
GGGGCTTAACCCCTGGACTGCATTGGAACACTGTTGTGCTTGTAGTGCAGGAGGGGTAAGCGGAATTCCTAGTGTAGCGGTG  
AAATGCTTAGATATCACGAAGAACTCCGATTGCGAAGGCGAGTCTGCTGGACTGTAAGTACGCTGATGCTCGAAAGTGTG  
GGTAT  
>ASV:4732:Species:baumannii/calcoaceticus/nosocomialis/radioresistens  
TACAGAGGGTGCAGCGTTAATCCGATTTACTGGGCGTAAAGCGTGCAGTAGGCGGCTTATTAAGTCCGATGTGAAATCCC  
CGAGCTTAACCTGGAAATTGCATTGATACTGGTGAAGTATGGGAGAGGATGGTAGAATTCAGGTGTAGCGGTG  
AAATGCGTAGAGATCTGGAGGAATACCGATGGCGAAGGCGAGCATCTGGCCTAATACTGACGCTGAGGTACGAAAGCATG  
GGGAG  
>ASV:4733:Family:Clostridiaceae\_2  
TACGTAGGGGGCAAGCGTTATCCGATTTATTGGGCGTAAAGGGTGCAGTAGGTTTCTTAAGTCAAGGTGAAAGGCT  
ACGGCTCAACCCGTAGTAAGCCTTTGAAACTGGGAACTTGTAGTGCAGGAGAGGAGAGTGGAAATTCCTAGTGTAGCGGTGA  
AATGCTTAGATATTAGGAGGAACACCAGTGGCGAAGGCGAGCTCACTGGAGTGTAACTGACGCTGATGCTCGAAAGTGTG  
GTATC  
>ASV:4734:Genus:Alistipes  
TCCTTCTTCTCCCTCTTTCTCCGATTTATTGGGTTAAAGGGTGCAGTAGGCGGTTTGTATAAGTTAGAGGTGAAATACC  
GGGGCTCAACTCCGAACTGCCTCTAATACTGTTGAACTAGAGAGTAGTTGCGGTAGGCGGAATGTATGGTGTAGCGGTG  
AAATGCTTAGAGATCATAAGAAACCAGTGGCGAAGGCGAGTACCAGAACTATATCTGACGTTGAGGCACGAAAGCGTG  
GGGAG  
>ASV:4735:Family:Lachnospiraceae  
TACGTAGGGGGCAAGCGTTATCCGATTTACTGGGTGTAAGGGAGCGTAGACGGAGCAGCAAGTCTGATGTGAAAGACC  
GGGGCTTAACCCCGGCGTGCATTGGAACACTGTTGATCTTGTAGTGCAGGAGGGGTAAGCGGAATTCCTGGTGTAGCGGTG  
AAATGCGTAGATATCAGGAGGAACACCAGTGGCGAAGGCGGTTACTGGACGGCAACTGACGTTGAGGCTCGAAAGCGTG  
GGGAG  
>ASV:4736:Genus:Solobacterium

TACGTAGGGGGCGAGCGTTATCCGGAATTATTGGGCGTAAAGGGTGCCTAGGCGGCCTGTTAAGTAAGTGGTTAAATTGC  
TGGGCTCAACCCAATCCAGCCACTTAAACTGGCAGGCTAGAGTATTGGAGAGGCAAGTGAATTCCATGTGTAGCGGTA  
AATGCGTAGATATATGGAGGAACACCAAGTGGCGAAGGCGGCTTCTAGCCAAAGACTGACGCTCATGCACGAAAGCGTGG  
GGAG

>ASV:4737:Family:Lachnospiraceae

TACGTATGGTCAAGCGTTATCCGGATTTACTGGGTGTAAGGGAGCGCAGGCGGTGCGCAAGTCTGATGTGAAAGGCG  
GGGGCTCAACCCCTGGACTGCATTGAAAAGTGTAGTCTTGAAGTGCAGGAGAGGTAAGCGGAATTCGTGGTGTAGCGGTG  
AATGCTTAGATATCACGAAGAAGTCCGATTGCGAAGGCAGCCTGCTAAGCTGCAACTGACATTGAGGCTCGAAAGTGTG  
GGTAT

>ASV:4738:Genus:Angelakisella

TACGTAGGGAGCGAGCGTTGTCCGGAATTACTGGGTGTAAGGGAGCGTAGGCGGGAAGGCAAGTTGGATGTGAAAAGTGT  
TGGGCTTAACCGACAGACTGCATTCAAAGTGTCTTCTTGAAGTGAAGTAGAGGCAAGCGGAATTCCTAGTGTAGCGGTG  
AATGCTTAGATATCACGAAGAAGTCCGATGCGAAGGCATTGTGCCGGGCGAGCACGACGCTGAGGCTCGAAAGTGTG  
GGTAT

>ASV:4739:Family:Lachnospiraceae

TACGGAGGATCCGAGCGTTATCCGGATTTATTGGGTTTAAAGGGAGCGTAGACGGCACAGCAAGTCTGAAGTGAATCCC  
CGGGCTCAACCCCGGACTGCTTTGAAAAGTGTAAAGTCTAGAGTGTGGAGAGGTAAGTGAATTCCTAGTGTAGCGGTG  
AATGCGTAGAGATTAGGAAGAAGTCCGATGCGAAGGCAGTCTTCTGGACGAAAAGTGAAGTGTAGGCGCGAAAGCGTG  
GGAG

>ASV:4740:Genus:Lactonifactor

TACGGAGGATCCGAGCGTTATCCGGATTTATTGGGTTTAAAGGGAGCGTAGGTGGATTGTTAAGTCAAGTGTGAAAAGTGT  
GCGGCTCAACCCCGTACTGCATTGAAAAGTGTGCTACTAGAGTGTGGAGGGGTAAGTGAATTCCTAGTGTAGCGGTG  
AATGCGTAGATATTAGGAGGAACACCAAGTGGCGAAGGCGGCTGCTGGACGATGACTGACGTTGAGGCTCGAAAGCGTG  
GGAG

>ASV:4741:Phylum:Firmicutes

TACGGAGGATCCGAGCGTTATCCGGATTTATTGGGTTTAAAGGGTGCCTAGGCGGCCTTTAAGTCAAGCGGTGAAAAGTCT  
GTGGCTCAACCATAGTTCGCTTTGAAAAGTGTCAAAGTGTAGTGCAGAAGGGGAGAGTGAATTCCTAGTGTAGCGGTG  
AATGCGTAGATATTAGGAGGAACACCGGTGGCGAAGGCGGCTCACTAGACTGTACTGACACTGATGCTCGAAAGTGTGG  
GTATC

>ASV:4742:Family:Lachnospiraceae

TACGTAGGGGGCAAGCGTTATCCGGATTTACTGGGTGTAAGGGAGCGTAGGCGGCCCGGCAAGTCAAGTCAAGTGAAGTCCC  
AGGGCTTAACCTGCGGATTGCTTTTGAAGTGTGAGGCTCGATTGCTGGAGAGGTAAGTGAATTCCTAGTGTAGCGGTG  
AATGCGTAGATATTAGGAGGAACACCAAGTGGCGAAGGCGGCTTACTGGACGTTAAATGACGCTGAGGCTCGAAAGCGTG  
GGAG

>ASV:4743:Kingdom:Bacteria

TACGTAGGGGGCAAGCGTTATCCGGATTTACTGGGTGTAAGGGAGCGTAGACGGAAGAGCAAGTCAAGGTTAATCCC  
ACGGCTTAACCTGGAAGTGTCTTTGAAAAGTGTGATACTGCATAAAGTGGATCCGGGAGAGGACAGCGGAATTCAGGTTAGGAGTG  
AATCCGTAGATATTGGAAGAACAATAAGTGGCGAAGGCGGCTGCTGGACCGTATTGACGCTGAGGCGCGAAAGCGTG  
GGTAG

>ASV:4744:Genus:Oribacterium

AACGTAGGGTGAAGCGTTGTCCGGAATTACTGGGTGTAAGGGAGCGTAGACGGAATGGCAAGTCTGAAGTGAAGTCCC  
CGGGCTCAACCTGGAAGTGTCTTTGAAAAGTGTGTTCTAGAGTGTGGAGAGGTAAGTGAATTCCTGGTGTAGCGGTG  
AATGCGTAGATATTAGGAGGAACACCGAGGCGAAGGCGGCTTACTGGACAATAACTGACGTTGAGGCTCGAAAGCGTG  
GGAT

>ASV:4745:Genus:Phocea

TACGTAGGGGGCAAGCGTTATCCGGATTTATTGGGTTTAAAGGGTGCCTAGGCGGCCTTTAAGTCAAGCGGTGAAAAGTCT  
GTGGCTCAACCATAGAAATTCGCTTTGAAAAGTGGGCTCTTGAAGTGAAGTAGAGGCGAGCGGAATTCCTAGTGTAGCGGTG  
AATGCGTAGATATTAGGAGGAACACCAAGTGGCGAAGGCGGCTGCTGGGCTTTACTGACGCTGAGGCTCGAAAGCGTG  
GGAG

>ASV:4746:Family:Enterobacteriaceae

TACGGAGGTTGCAAGCGTTAATCCGGAATTACTGGGCGTAAAGCGCACGAGGCGGTTTGTAAAGTCAAGTGTGAAAATCCC  
CGGGCTCAACCTGGAAGTGCATCTGATACTGGCAAGCTTGAAGTCTGCTAGAGGGGGTAGAATTCAGGTTAGCGGTG  
AATGCGTAGATATTAGGAGGAACACCAATGGCGAAGGCGAGTCTCTGGGCCGTTACTGACGCTGAGGAGCGAAAGCGTG  
GGAG

>ASV:4747:Family:Ruminococcaceae

TACGTAGGGAGCGAGCGTTGTCCGGAATTACTGGGTGTAAGGGAGCGTAGGCGGGAAGCAAGTTGGAAGTGAATGCA  
TGGGCTTAACCATAGACTGCTTTCAAAGTGTCTTCTTGAAGTGAAGTAGAGGCGAGCGGAATTCCTAGTGTAGCGGTG  
AATGCGTAGATATTAGGAGGAACACCAAGTGGCGAAGGCGGCTGCTGGGCTTTAAGTCAAGTGTGAAAAGTGTG  
GGAG

>ASV:4748:Family:Lachnospiraceae

TACGTAGGGGGCAAGCGTTATCCGGATTTACTGGGTGTAAGGGAGCGTAGACGTTATGTAAGTCTGATGTGAAAAGTGT  
GGGGCTCAACCCCGGACTGCATTGAAAAGTGTAAAGTCTAGAGTGTGGAGAGGTAAGTGAATTCCTAGTGTAGCGGTG  
AATGCGTAGATATTAGGAGGAACACCAAGTGGCGAAGGCGGCTTCTGGACTGTGCTGACGCTGAGATGCGAAAGCCAG  
GGTAG

>ASV:4749:Family:Peptococcaceae

TACGTAGGGAGCGAGCGTTGTCCGGAATTACTGGGCGTAAAGGGCGTGTAGGCGGGAATTTAAGTAAAGTGTGAAAAGTGT  
CGGGCTCAACCCGGAGACTGCATTTAAAGTGTCTTGAAGGCGAGGAGGAAAGTGAATTCCTAGTGTAGCGGTG  
AATGCGTAGATATTAGGAGGAACACCAAGTGGCGAAGGCGGCTTCTGGACTGTACCTGACGCTGAGGCGCGAAAGCGTG

GGGAG

>ASV:4750:Genus:Catabacter

TACGTAGGGAGCGAGCGTTGTCCGGATTACTGGGCGTAAAGGGTGCCTAGGTGGTCAAGTAAAGTCAGATGTGAAAAGACC  
GGGGCTTAACCCGGGATTGCATTTGAAACTGTTTGACTTGAGTACAGGAGAGGGAAAGTGAATTCCCTAGTGTAGCGGTG  
AAATGCGTAGATATTAGGAGGAACACCAGTGGCGAAGGCGGCTACTGGGCACCAACTGACGCTGAGGCTCGAAAGTGTG  
GGTAG

>ASV:4751:Genus:Eisenbergiella

TACGTAGGGGGCAAGCGTTATCCGGATTTACTGGGTGTAAGGGGAGCGTAGACGGCATGGCAAGCCAGATGTGAAAACCC  
AGGGCTCAACCTTGGGATTGCATTTGAAACTGTCAGGCTGGAGTGCAGGAGAGGTAAGCGGAATTCCTAGTGTAGCGGTG  
AAATGCGTAGATATCGAGAGGAACACTCGTGGCGAAGGCGGGTTCCTGGACATTAAGTACGCTGAGGCACGAAGGCCAG  
GGGAG

>ASV:4752:Kingdom:Bacteria

TACGGAGGATGCGAGCGTTATCCGGATTTATTGGGTTAAAGGGCGTGTAGGCGGGAGTGAAGTCAGATGTGAAAACCTA  
TGGGCTCAACCCATAGCCTGCATTTGAAACTGTACTTCTTGAGTACTGGAGAGGCGAGCGGAATTCCTGTGTAGCGGTG  
AAATGCTTAGATATCACGAAGAACTCCGATTGCGAAGGCAGTCACTGGAGCGCAACTGACGCTGAAGCTCGAAAGTGGC  
GGTAT

>ASV:4753:Family:Enterobacteriaceae

TACGTATGGTGCAGCGTTAATCCGGAATTACTGGGCGTAAAGCGCACGCAGGCGGTCTGTCAAGTCGGATGTGAAATCCC  
CGGGCTCAACCTGGGAACTGCATTGAAACTGGCAGGCTAGAGTGTGCGGAGGGGTAAGCGGAATTCCTAGTGTAGCGGTG  
AAATGCGTAGATATTAGGAGGAACACCAGTGGCGAAGGCGGCTACTGGACGATTACTGACGCTGAGGCTCGAAAGCGTG  
GGGAG

>ASV:4754:Phylum:Firmicutes

TACGTAGGTCCCAGCGTTGTCCGGATTTATTGGGCGTAAAGCGAGCGCAGGCGGTTTGATAAGTCTGAAGTTAAAGGCT  
GTGGCTCAACCCGGAATTGCTTTTAAACTGTCAGGCTAGAGTGTGCGGAGGGGTAAGCGGAATTCCTAGTGTAGCGGTG  
AAATGCGTAGATATTAGGAGGAACACCAGTGGCGAAGGCGACTTTCTGGACGAAAACGACGCTGAGGCGCGAAAGCGTG  
GGGAG

>ASV:4755:Family:Ruminococcaceae

TACGTAGGGGGCAAGCGTTATCCGGATTTACTGGGTGTAAGGGCGTGTAGGCGGGATTGCAAGTCAGATGTGAAAACCTG  
GGGGCTCAACCTCCAGCCTGCATTTGAAACTGTAGTTCTTGAGTAGTGCAGAGGTAGGCGGAATTCCTGGTGTAGCGGTG  
GAATGCGTAGATATCGGGAGGAACACCAGTGGCGAAGGCGGCTACTGGGCACCAACTGACGCTGAGGCTCGAAAGCATG  
GGTAG

>ASV:4756:Genus:Anaerofilum

AACGTAGGTGGCAAGCGTTGTCCGGAATTACTGGGTGTAAGGGAGCGCAGGCGGAAGTGAAGTTGGGTGTCAAATCTA  
CGGGCTTAACCCGATCCGCACTCAAACTGTGGTCTTGAGTAGTGCAGAGGTAGGCGGAATTCCTGGTGTAGCGGTGG  
AATGCGTAGATATCGGGAGGAACACCAGTGGCGAAGGCGGCTACTGGACGATAACTGACGCTGAGGCTCGAAAGCGTGG  
GGAGC

>ASV:4757:Species:agalactiae/pyogenes

TACGTAGGTCCCAGCGTTGTCCGGATTTATTGGGCGTAAAGCGAGCGCAGGCGGTTCTTTAAGTCTGAAGTTAAAGGCA  
GTGGCTTAACCATTTGACGCTTTGAAACTGGAGGACTTGTAGTGCAGAGGGGAGAGTGAATTCCATGTGTAGCGGTGA  
AATGCGTAGATATATGAGGAACACCAGTGGCGAAGGCGGCTCTCTGTCTGTAAGTACGCTGAGGCTCGAAAGCGTGG  
GGAGC

>ASV:4758:Genus:Subdoligranulum

TACGTAGGTGGCAAGCGTTGTCCGGAATTACTGGGTGTAAGGGAGCGCAGGCGGGAAGACAAGTTGGAAGTAAAACCA  
TGGGCTCAACCCATGAATTGCTTTCAAACCTGTTTTCTTGAGTAGTGCAGAGGTAGATGGAATTCCTGGTGTAGCGGTG  
GAATGCGTAGAGATCAGGAGGAACATCGTGGCGAAGGCGGCTACTGGGCTTTACTGACGCTGAGGCTCGAAAGCGTG  
GGGAG

>ASV:4759:Kingdom:Bacteria

TACGGAAGGTCCGGCGTTATCCGGATTTATTGGGTTAAAGGGAGCGTAGGCGGGTGTAAAGTCAGTTGTGAAAAGTTT  
GCGGCTCAACCTGGGAACTGCATCTGATACTGGCAAGCTTGTAGTCTGTAGAGGGGGTAGAATTCAGGTGTAGCGGTG  
AAATGCGTAGAGATCTGGAGGAACACCAGTGGCGAAGGCGGCTCTCTGGTCTGTAAGTACGCTGAGGCTCGAAAGCGTG  
GGGAG

>ASV:4760:Genus:Allisonella

TACGTAGGTGGCAAGCGTTGTCCGGAATTATTGGGCGTAAAGCGCGCAGGCGGCCGTGCAAGTCCATCTTAAAAGCGT  
GGGGCTTAACCCATGAGGGGATGAAACTGCAGGCTGGAGTGTGCGAGGGGAAAGTGAATTCCCTAGTGTAGCGGTGG  
AATACGTAGATATCTGGAAGAACACCAAGGCGAAGGCGAGTCTCTGGGCAAATACTGACGCTCATATGCGAAAGCGTGG  
GTAGC

>ASV:4761:Genus:Brachybacterium

TACGTAGGGCGCAAGCGTTGTCCGGAATTATTGGGCGTAAAGAGCTCGTAGGTGGCTTGTGCGCTGCGGTGAAAACCC  
GAGGCTCAACCTCGGGGGTGCAGTGGGTACGGGCGAGCTAGAGTGTGGTAGGGGAGACTGGAATTCCTGGTGTAGCGGTG  
AAATGCGCAGATATCAGGAAGAACACCAGTGGCGAAGGCGAGTCTCTGGGCCATTACTGACACTGAGGAGCGAAAGCATG  
GGTAG

>ASV:4762:Genus:Butyricicoccus

TACGTAGGGAGCAGGCGTTATCCGGATTTACTGGGTGTAAGGGCGCGCAGGCGGGCCGCAAGTTGGAAGTGAATCCG  
GGGGCTTAACCCCGAACTGCTTTCAAACCTGCTGGTCTTGAGTGTGGAGAGGCGAGCGGAATTCCTGTGTAGCGGTG  
GAATGCGTAGATATACGGAGGAACACCAGTGGCGAAGGCGGCTGCTGGACATTAAGTACGCTGAGGCGCGAAAGCGTG  
GGGAG

>ASV:4763:Family:Peptococcaceae

TACGTAGGTGGCAAGCGTTGTCCGGAATGACTGGGCGTAAAGGGCGTGTAGGTGGATGGATCAGTCGGATGTGAAGGCC

CGGGCTTAACCCGGGAACGGCATCCGATACGGTCCGTCTTGTAGTGCAGGAGAGGGCAGTGGAATTCAGTGTAGCGGTG  
AAATGCGTAGAGATTGGGAGGAACACCAGTGGCGAAGGCGGCTGCTGGACTGTAACGACACTGAGGCGCAAAGCGTG  
GGGAG  
>ASV:4764:Genus:Barnesiella  
TACGTAGGTGGCAAGCGTTATCCGGATTTATTGGGTTAAAGGGTGCCTAGGCGGCACGCCAAGTCAGCGGTGAAATTC  
CGGGCTCAACCCGAGTGTGCCGTTGAAACTGGCGAGCTAGAGTACACAAGAGGCAGGCGGAATTCCTAGTGTAGCGGTG  
AAATGCGTAGATATTAGGAGGAACACCAGTGGCGAAGGCGGCTGCTGGACGACAACGACGCTGAGGCGCAAAGTGTG  
GGGAG  
>ASV:4765:Kingdom:Bacteria  
AACGTAGGTCACAAGCGTTGTCCGGAATTACTGGGTGTAAGGGAGCGAGGCGGGCGATCAAGTTGGAAGTAAATCCA  
TGGGCTCAACCCATGAACTGCTTTCAAACCTGTTTTCTTGTAGTAGTTGCGGTAGGCGGAATGTATGTTGTAGCGGTGAA  
ATGCTTAGAGATCATACAGAACACCGATTGCGAAGGCAGCTTACCAAATATATCTGACGTTGAGGCACGAAAGCGTGG  
GAGCA  
>ASV:4766:Kingdom:Bacteria  
TACGTAGGTGGCAAGCGTTGTCCGGAATAATTGGGCGTAAAGGGCGCTAGGCGGCTCGGTAAGTCTGGAGTAAAATCC  
TGCTTTTAAAGTGGGAATTGCTTTGGATACTGTCCGGCTTGTAGTGCAGGAGAGGTTAGTGGAATTCGCCGTGTAGCGGTG  
AAATGCTTAGATATGGCGAAGAATCCGATTGCGAAGGCAGCTGACGGGTGCGTAACTGACGCTCATGCTCGAAAGTGGC  
GGTAT  
>ASV:4767:Family:Ruminococcaceae  
TACGTAGGTGGCAAGCGTTGTCCGGAATTACTGGGTGTAAGGGAGCGAGGCGGACCGGCAAGTTGGAAGTAAAACCTA  
TGGGCTCAACCCATAAATTGCTTTGAGAACTGCTGGCCTTGTAGTAGTGCAGAGGTAGGTGGAATTCCTAGTGTAGCGGTG  
AAATGCGTAGAGATTAGGAAGAACACCGGTGGCGAAGGCGACTTCCGGACGAAAACGACGCTGAGGCGCAAAGCGTG  
GGGAG  
>ASV:4768:Family:Ruminococcaceae  
TACGTAGGTGGCAAGCGTTGTCCGGAATTACTGGGTGTAAGGGCGGTAGCGGGAAGGCAAGTCAGATGTGAAATCCA  
CGGGCTCAACTCGTGAAGTGCATTTGAAACTGTTTTCTTGTAGTATCGGAGAGGCAATCGGAATTCCTAGTGTAGCGGTG  
AAATGCGTAGATATCAGGAAGAATCCGATTGCGAAGGCAGCTGCTAAGCTGCAACTGGCATTGAGGCTCGAAAGTGTG  
GGTAT  
>ASV:4769:Family:Lachnospiraceae  
TACGTATGGAGCAAGCGTTATCCGGATTTACTGGGTGTAAGGGAGCGTAGGCGGCTGCAAGTCTGATGTGAAAGGCC  
GGGGCTCAACCCGGGACTGCATTGAAAACCTGAGGACTAGAGTGTCCGAGGGGTAAGTGGAAATTCCTAGTGTAGCGGTG  
AAATGCTTAAATATCAGGAAGAATCCGATTGCGAAGGCAGCTTACTGGACTGTAACGTGCTGATGCTCGAAAGTGTG  
GGTAT  
>ASV:4770:Genus:Acidaminococcus  
TACGGAGGATCCGAGCGTTATCCGGATTTATTGGGTTAAAGGGAGCGTAGGCGGGCTTTAAGTCTGACGTGAAAATGC  
GGGGCTTAACCCCGATGGCGTTGGATACTGGAAGTCTTGTAGTGCAGGAGAGGAAAGGGGAATTCAGTGTAGCGGTGA  
AATGCGTAGATATTGGGAGGAACACCGGTGGCGAAGGCGGCTTCTGGACTGTAACGACGCTGAGGTACGAAAGCGTGG  
GGAGC  
>ASV:4771:Class:Clostridia  
TACGTAGGGAGCGAGCGTTGTCCGGAATTACTGGGCGTAAAGGGTGCCTAGGCGGCTGAAAAGTCCGATGTGAAATCCC  
CGTGCTTAACATGGGAGCTGCATTCGAAACTTTCCGACTTGAATGTCCGAGAGGTAGCGGAATTCCTGGTGTAGCGGTG  
AAATGCGTAGATATCCGGAGGAACACCAGTGGCGAAGGCGGCTTACTGGACGACAACGACGCTGAGGCACGAAAGCGTG  
GGGAG  
>ASV:4772:Species:cf./pametensis/pullorum  
TACGGAGGGTGCAGCGTTACTCCGGAATCACTGGGCGTAAAGAGCGCGTAGGCGGGGTAGTAAGTCAGATGTGAAATCCT  
ATGGCTTAACCATAGAAGTGCATTTGAAACTACTACTTAGAGTATGGGAGAGGTAGGTGGAATTCCTGGTGTAGGGGTA  
AAATCCGTAGATATCAAGAGGAATACTCATTGCGAAGGCGACCTGCTGGAACATTACTGACGCTGATGCGCAAAGCGTG  
GGGAG  
>ASV:4773:Family:Lachnospiraceae  
TACGTATGGTCAAGCGTTATCCGGATTTACTGGGTGTAAGGGAGCGTAGACGGCTTTGCAAGTCTGACGTGAAACTCC  
GGGGCTCAACTCCGGAAGTGCCTTGGAAACTGTAAGGCTTGTAGTCCGGAGAGGTAGCGGAATTCCTAGTGTAGCGGTG  
AAATGCTTAGATATCAGGAAGAATCCGATTGCGAAGGCAGCTACTGGAGTGAACGACGCTGATGCTCGAAAGTGGC  
GGTAT  
>ASV:4774:Order:Clostridiales  
TACGGAGGATCCGAGCGTTATCCGGATTTATTGGGTTAAAGGGAGCGTAGGCGGCATGGCAAGTCAGAAGTAAAAGCCT  
GGGGCTCAACCCGGAATTGCTTTTGAAGTGTGAGGCTAGAGTGTCCGAGGGGTAGCGGAATTCCTGGTGTAGCGGTG  
GAATGCGTAGATATCCGGAGGAACACCAGTGGCGAAGGCGGCTTACTGGGCACCAACTGACGCTGAGGCTCGAAAGTGTG  
GGTAG  
>ASV:4775:Family:Ruminococcaceae  
TACGTAGGGAGCGAGCGTTGTCCGGAATTACTGGGTGTAAGGGAGCGTAGGCGGGAAAGCAAGTTGGAAGTAAATGCA  
TGGGCTCAACCCATGAGTGTCTTTCAAACCTGTTTTCTTGTAGTGAAGTAGAGGCAGGCGGAATTCCTAGTGTAGCGGTG  
AAATGCGTAGATATTAGGAGGAACACCAGTGGCGAAGGCGGCTGCTGGACAGTAACTGACGCTGAGGCTCGAAAGTGTG  
GGTAG  
>ASV:4776:Genus:Dialister  
TACGTAGGGTGCAGCGTTAATCCGGAATTATTGGGCGTAAAGCGCGCGAGGCGGCTTCCCAAGTCCCTTTAAAAGTGC  
GGGGCTTAACCCGTGATGGGAAGGAAACTGGGAAGCTGGAGTATCGGAGAGGAAAGTGGAAATTCCTGTGTAGCGGTGA  
AATGCGTAGATATCCGGAGGAACACCAGTGGCGAAGGCGGATTGCTGGACAGTAACTGACGCTGAGGCTCGAAAGCGTG  
GGAGC



>ASV:4777:Family:Ruminococcaceae  
TACGGAGGATCCGAGCGTTATCCGGATTTATTGGGTTTAAAGGGAGCGTAGGCCGGGATCGCAAGTCAGATGTGAAAACCTA  
TGGGCTTAACCCATAAACTGCATTTGAAACTGTGGTCTTGAGTGAAGTAGAGGTAAGCGGAATTCCTAGTGTAGCGGTG  
GAATGCGTAGATATCGGGAGGAACACCAGTGGCGAAGGCGGCTACTGGGCACCAACTGACGCTGAGGCTCGAAAGTGTG  
GGTAG  
>ASV:4778:Genus:Prevotella\_9  
TACGGAAAGTCCGGGCGTTATCCGGATTTATTGGGTTTAAAGGGAGCGTAGGCCGGAGATTAAGCGTGTGTGAAATGTA  
GATGCTCAACATCTGAACCTGACGCGCAACTGGTTTCCTTGAGTACGCACAAAGTGGCGGAATTCCTGGTGTAGCAGTG  
AAATGCGTAGATATCGAGAGGAACACTCGTGCGAAGGCGGTTCTTGACATTAACCTGACGCTGAGGCACGAAGGCCAG  
GGGAG  
>ASV:4779:Genus:Oscillibacter  
TACGTAGGTGGCAAGCGTTGTCCGGATTTACTGGGTGTAAGGGGCGTGCAGCCGGGCTGGTAAGTCAGATGTGAAATCTG  
GAGGCTCAACCTCCAACTGCATTTGAAACTGTGGTCTTGAGTACCGGAGAGGTTATCGGAATTCCTTGTGTAGCGGTG  
AAATGCGTAGATATCACGAGAACCCGATTGCGAAGGCAGCTGCTAGGGTAAACAGACGCTGAGGCACGAAAGCGTG  
GGTAT  
>ASV:4780:Genus:Barnesiella  
TACGGAGGATGCAAGCGTTATCCGGATTTATTGGGTTTAAAGGGTGCCTAGGCCGACGCCAAGTCAGCGGTGAAATTTCC  
CGGGCTTAACCCCGACTGTGCGGTTGAAACTGGCAGCTAGAGTACACAAGAGGCAGGCGGAATTCCTAGTGTAGCGGTG  
AAATGCGTAGAGATGGGAGGAACACCAGTGGCGAAGGCGGCTGCTGGGCTTAACTGACACTGATGCGGAAAGTGTG  
GGTAG  
>ASV:4781:Genus:Lactonifactor  
TACGGAGGATCCGAGCGTTATCCGGATTTACTGGGTGTAAGGGGAGCGTAGACGGCGTATCAAGTCTGATGTGAAAGGCA  
GGGGCTTAACCCCGACTGCATTTGAAACTGGTATGCTTGAGTGTGCGGAGAGGTAAGTGGAAATTCCTAGTGTAGCGGTG  
AAATGCTTAGATATCACGAAGAACCCGATTGCGAAGGCAGCTTACTGGATTGTAACCTGACGCTGATGCTCGAAAGTGTG  
GGTAT  
>ASV:4782:Genus:Sutterella  
TACGTAGGGTGAAGCGTTAATCGGAATTTACTGGGCGTAAAGCGTGCAGGCGGTTGGTAAGACAGATGTGAAATCCC  
CGGGCTTAACCCCGAACTGCTTTTGAACTGTGACTGCTCGACTAGAGTATGTCAGAGGGGGTGAATTCCTAGTGTAGCAGTG  
AAATGCGTAGATATTTGGAAGAACACCAGTGGCGAAGGCAGCCCCCTGGGGCAAACCTGACGCTCATGCACGAAAGCGTG  
GGGAG  
>ASV:4783:Kingdom:Bacteria  
TACGGAGGATGCGAGCGTTATCCGGATTTATTGGGTTTAAAGGGAGCGTAGGTGGTGCAGCAAGTCAGAAGTAAAAGCCC  
GGGGCTTAACCCCGGACTGCTTTTGAACCTGTAGCTAGAGTGCAGGAGAGGTAAGTGGAAATTCCTAGTGTAGCGGTG  
AAATGCTTAGATATCACGAAGAACCCGATTGCGAAGGCAGCTTACTGGATTGTAACCTGACGCTGATGCTCGAAAGTGTG  
GGTAT  
>ASV:4784:Genus:Ruminococcaceae\_UCG-011  
TACGTAGGTGCGAGCGTTGTCCGGATTTACTGGGTGTAAGGGTGCCTAGGCCGGGAGTAAAGTCAGATGTGAAATCCC  
GGGGCTCAACCCCGAACTGCGTTTGAACCTCACTGTCTTGAGTGAAGTAGAGGTAAGTGGAAATTCCTAGTGTAGCGGTG  
GAATGCGTAGATATTAGGAGGAACACCAGTGGCGAAGGCGACTTACTGGGCTTAACTGACGCTGAGGCACGAAAGCATG  
GGGAG  
>ASV:4785:Genus:Ruminococcaceae\_UCG-013  
TACGTAGGTGACAAGCGTTGTCCGGATTTACTGGGTGTAAGGGTGCCTAGGCCGGGAGTAAAGTCAGATGTGAAATCCC  
GGGGCTCAACCCCGGGGCTGCTTTTGAACCTGTGCGCTTGAGTATCGGAGAGGAAAGCGGAATTCCTAGTGTAGCGGTG  
AAATGCGTAGATATTGGGAGGAACACCAGTGGCGAAGGCGGCTTCTGGACGACAACCTGACGCTGAGGCACGAAAGTGTG  
GGGAG  
>ASV:4786:Order:Bacteroidales  
TACGTAGGGAGCAAGCGTTATCCGGATTTACTGGGTGTAAGGGTGCCTAGGTGGTATGCGAAGTCAGAAGTAAAACCC  
AGGGCTTAACCTGCGGACTGCTTTTGAACCTGGCAGTCTTGAGTACAGTAGAGATGGGCGGAATTCCTGGTGTAGCGGTG  
AAATGCTTAGATATCACGAAGAACCCGATTGCGAAGGCAGCTCACTAGACTGTCACCTGACACTGATGCTCGAAAGTGTG  
GGTAT  
>ASV:4787:Family:Ruminococcaceae  
TACGTATGGTGAAGCGTTATCCGGATTTACTGGGTGTAAGGGTGCCTAGACGGGAGAACCAAGTTAGTTGTGAAATACC  
TCGGCTCAACTGAGGAACTGCAACTAAAACCTGACTTCTTGAGTGCAGGAGAGGTAAGTGGAAATTCCTAGTGTAGCGGTG  
AAATGCGTAGAGATCGGGAGGAACACCAGTGGCGAAGGCGGCTGCTGGGCTTAACTGACGCTGAGGCACGAAAGCGTG  
GGTAG  
>ASV:4788:Order:Clostridiales  
TACGTAGGGGCGAGCGTTATCCGGATTTACTGGGTGTAAGGGTGTGTAGGCCGGGACGACGAGTCAGATGTGAAATTTG  
CAGGCTCAACCTGGAAAGTGCATTTGAAACTGCCGTTCTTGAGAGTGCAGGAGGTAAGTGGAAATTCCTGGTGTAGCGGTG  
AAATGCGTAGAGATCATAACGAACACCAGTGGCGAAGGCAGCTTACCAAACCTATATCTGACGTTGAGGCACGAAAGCGTG  
GGGAG  
>ASV:4789:Family:Lachnospiraceae  
TACGTAGGGGCGAAGCGTTATCCGGATTTACTGGGTGTAAGGGGAGCGTAGGCCGACTATTAAGTCAGCTGTGAAAGTTT  
GCGGCTCAACCGTAAATGCAAGTTGATACTGGTGTCTTGAGTGCAGTAGAGGTAGGCCGGAATTCCTGGTGTAGCGGTG  
AAATGCGTAGATATTAGGAAGAGCACCAAGTGGCGAAGGCGGCTTACTGGACGTTAAGTACGCTTGGGCTCGAAAGCGTG  
GGGAG  
>ASV:4790:Family:Lachnospiraceae  
AACGTAGGTCAACAGCGTTGTCCGGATTTACTGGGTGTAAGGGGAGCGCAGGCGGTGCGGCAAGTCTGAAGTAAAAGCCC  
GGGGCTCAACCCCGGACTGCTTTGAAACTGTTAACTAGAGTGTGCGAGGGGTAAGTGGAAATTCCTAGTGTAGCGGTG

AAATGCGTAGATATTAGGAAGAACCACAGTGGCGAAGGCGACTTTCTGGACGAAAACGACGCTGAGGCTCGAAAGCGTG  
GGAG  
>ASV:4791:Order:Clostridiales  
TACGTAGGGAGCGAGCGTTGTCCGGAATTACTGGGCGTAAAGGGCGCGTAGGCGGTAGATCAAGTCGTATGTGAAATACC  
CGGGCTCAACCTGGGGGTGCATGCGAAACTGGAATACTTGAGTGCAGTAGAGGAAAGTGAATTCCTAGTGTAGCGGTG  
AAATGCGTAGATATTAGGAGGAACCACAGTGGCGAAGGCGACTTTCTGGGCCGTAACGACGCTGAGGCGCGAAAGCGTG  
GGAG  
>ASV:4792:Order:Clostridiales  
TACGTAGGATCCAAGCGTTATCCGGATTTATTGGGTTAAAGGGTGCAGTAGGCGGTTTTATAAGTTAGAGGTTAAATATC  
GGAGCTTAACCCGTTATGCCTCTAATACTGTAGGACTAGAGTGCAGGAGAGGTAAGCGGAATTCCTAGTGTAGCGGTGA  
AATGCGTAGATATTAGGAGGAACATCAGTGGCGAAGGCGGCTTACTGGACTGAAACTGACACTGAGGACGAAAGCGTG  
GGAGC  
>ASV:4793:Class:Bacteroidia  
TACGTAGGTGGCAAGCGTTATCCGGAATTATTGGGTTAAAGGGAGCGTAGGCGGACGCTTAAGTCAGTTGTGAAAGTTT  
GCGGCTCAACCGTAAAATTGCAGTTGATACTGGCGACTTTCAGTGCAGTAGAGGTAAGCGGAATTCCTAGTGTAGCGGTG  
AAATGCGTAGATATTGGGAGGAACCACAGTGGCGAAGGCGCCTTTCTGGACTGTGTCTGACGCTGAGATGCGAAAGCCAG  
GGTAG  
>ASV:4794:Genus:Bacteroides  
TACGTATGGTGAAGCGTTATCCGGATTTATTGGGTTAAAGGGAGCGTAGGCGGTTTAAAGTCAGTTGTGAAAGTTT  
GCGGCTCAACCGTAAAATTGCAGTTGATACTGGCGACTTTCAGTGCAGTTGAGGCGAGGCGGAATTCCTAGTGTAGCGGTG  
AAATGCTTAGATATACGAAGAACCAGTGGCGAAGGCGACTTACTGGACTGTAACGACGTTGAGGCTCGAAAGCGTG  
GGAG  
>ASV:4795:Family:Lachnospiraceae  
TACGTATGGTGAAGCGTTATCCGGATTTACTGGGTGTAAGGGAGCGCAGGCGGTGCGGCAAGTCTGATGTGAAAGCCC  
GGGGCTCAACCCCGGACTGCTTTGGAACACTATGCAGCTAGAGTGTGCGAGAGGTAAGTGAATTCCTAGTGTAAAGCGTG  
GAATGCGTAGATATCGGAGGAACCACAGTGGCGAAGGCGGCTTACTGGCCCAACTGACGTTGAGGCTCGAAAGCGTG  
GGAG  
>ASV:4796:Family:Ruminococcaceae  
TATGTAGGGAGCGAGCGTTGTCCGGATTTACTGGGTGTAAGGGTGCAGTAGGCGGCGAGGCAAGTCAGGCGTGAATCTA  
TGGGCTTAACCCATAAACTGCCTTGAACCTGCTTTCAGTGAAGTAGAGGTAGGCGGAATTCCTAGTGTAGCGGTG  
AAATGCTTAGATATACGAAGAACCAGTGGCGAAGGCGGCTTACTGGACTGTAACGACGTTGAGGCTCGAAAGCGTG  
GGTAT  
>ASV:4797:Family:Ruminococcaceae  
TACGGAGGATCGAGCGTTATCCGGATTTACTGGGTGTAAGGGAGCGCAGGCGACTGCAAGTCTGAAGTGAAGCCC  
GGGGCTCAACCCCGGACTGCTTTGGAACACTGAGAGCTTTCAGTGAAGTAGAGGTAGGCGGAATTCCTAGTGTAGCGGTG  
AAATGCGTAGAGATCGGAGGAACCACAGTGGCGAAGGCGGCTTACTGGCTTAACTGACGCTGAGGACGAAAGCATG  
GGTAG  
>ASV:4798:Family:Lachnospiraceae  
TACGTAGGGGCGAGCGTTATCCGGATTTACTGGGTGTAAGGGTGCAGTAGGCGCAGTGAAGTCAGATGTGAAAGGCC  
GGGGCTCAACCCCTGAACTGCATTTGAAACTGTATTTCTTTCAGTGTGCGAGAGGTTGACGGAATTCCTAGTGTAGCGGTG  
AAATGCGTAGATATTAGGAGGAACCACAGTGGCGAAGGCGGCTTCTGGACTGTTACTGACACTGAGGACGAAAGGTGTG  
GGAG  
>ASV:4799:Genus:Veillonella  
TACGTAGGTGGCAAGCGTTGTCCGGAATTATTGGGCGTAAAGCGCGCAGGTGGATCAGTCAGTCTGTCTTAAAAGTTC  
GGGGCTTAACCCCGTATGGGATGGAACCTGCTGATCTAGAGTATCGGAGAGGAAAGTGAATTCCTAGTGTAGCGGTGA  
AATGCGTAGATATTAGGAAGAACCACAGTGGCGAAGGCGACTTTCTGGACGAAAACGACGCTGAGGCGCGAAAGCCAGG  
GGAGC  
>ASV:4800:Genus:Clostridium\_sensu\_stricto\_1  
TACGTAGGTGGCGAGCGTTGTCCGGATTTACTGGGCGTAAAGGGAGCGTAGGCGGACTTTTAAAGTGAGATGTGAAATACC  
CGGGCTCAACTTGGGTGCTGCATTTCAAACCTGGAAGTCTAGAGTGCAGGAGAGGAGAATGGAATTCCTAGTGTAGCGGTG  
AAATGCGTAGAGATTAGGAAGAACCACAGTGGCGAAGGCGATTCTCTGGACTGCAACTGACACTGATGCTCGAAAGGTGTG  
GGTAT  
>ASV:4801:Family:Enterobacteriaceae  
TACGGAGGATCCGAGCGTTAATCCGGAATTACTGGGCGTAAAGCGCACGCAGGCGGTCATTAAGTCAGATGTGAAAGCCC  
CGAGCTTAACCTGGGAATTGCATCTGAAACTGGTTGGCTAGAGTCTTGTAGAGGGGGGTAGAATTCATGTGTAGCGGTG  
AAATGCGTAGAGATGTGGAGGAATACCGGTGGCGAAGGCGGCCCTTGACAAAGACTGACGCTCAGGTGCGAAAGCGTG  
GGAG  
>ASV:4802:Order:Coriobacteriales  
TACGTAGGGGCGAGCGTTGTCCGGATTTACTGGGCGTAAAGGGCGCGTAGGCGGCCCGGAAGGCCGGGGGTGAAAGCGC  
GGGGCCCAACCCGCAAGCGCCCCGGGACCCCCGGGCTCCCGCAGGGGGTGGCGGAACCTCCCGGTGTAGCGGTG  
GAATGCGCAGATATCGGAGGAACCACCGTGGCGAAGGCGGCACCTGGGCGGCGACGACGCTGAGGCGCGAGAGCCGG  
GGAG  
>ASV:4803:Genus:Parvimonas  
TACGTATGGGCGAGCGTTGTCCGGAATTATTGGGCGTAAAGGGTACGTAAGGCGGCTTTTAAAGTCAGTGTGAAAGCGT  
GAGGCTTAACCTCATTAAGCATTTGAAACTGGAAGGCTTTCAGTGAAGGAGAGGAAAGTGAATTCCTAGTGTAGCGGTGA  
AATGCGTAGATATTAGGAGGAATACCGGTGGCGAAGGCGACTTTCTGGACTTTTACTGACGCTCAGGTACGAAAGCGTG  
GGAGC  
>ASV:4804:Kingdom:Bacteria

TACGGAGGATGCGAGCGTTATCCGGATTTATTGGGTTAAAGGGAGCGCAGACGGGTCGTTAAGTCAGCTGTGAAAAGTTT  
GGGGCTCAACCTTAAAATTGCAAGTTGATACTGCCAGGCTTAGTACCAGGAGAGGGTGGCGGAATTCAGGTGTAGGAGTG  
AAATCGTAGATATTAGGAGGAACACCAGTGGCGAAGGCGGCTTACTGGACGATAACTGACGCTGAGGCTCGAAAGCGTG  
GGGAG

>ASV:4805:Family:Lachnospiraceae

TACGGAGGATCCGAGCGTTATCCGGATTTATTGGGTTAAAGGGAGCGTAGACGGATGGGCAAGTCTGATGTGAAAACCC  
GGGGCTCAACCCGGGACTGCATTGAAAAGTGTTCATCTAGAGTGTGGAGAGGTAAGTGAATTCCTAGTGTAGCGGTG  
AAATGCATAGATATCACGCAGAACTCCAATTGCGAAGGCAGCTTACTAACTATAACTGACACTGAAGCACGAAAGCGTG  
GGGAT

>ASV:4806:Order:Bacteroidales

TACGGAGGATCCGAGCGTTATCCGGATTTATTGGGTTAAAGGGAGCGTAGGCGGGTTGTTAAGTCAGTTGTGAAAAGTTT  
GCGGCTCAACCGTAAAATTGCAAGTTGATACTGGCGACCTTAGTGCAACAGAGGTAGGCGGAATTCATGTGTAGCGGTG  
AAATGCGTAGATATATGGAGGAACACCAGTGGCGAAAAGCGGCTCTCTGGTCTGTAACGACGCTGAGGCTCGAAAGTGTG  
GGTAT

>ASV:4807:Genus:Ralstonia

TACGTAGGGTCCAAGCGTTAATCGGAATTACTGGGCGTAAAGCGTGCAGGCGGTTGTGCAAGACCGATGTGAAATCCC  
CGAGCTTAACTTGGGATTGCATTGGTACTGCACGGCTAGAGTGTGTCAGAGGGGGTGAATTCACGCTGTAGCAGTG  
AAATGCGTAGAGATGTGGAGGAATACCAGTGGCGAAGGCAGCCCCCTGGGATAACACTGACGCTCATGCACGAAAGCGTG  
GGGAG

>ASV:4808:Genus:Flavonifractor

TACGTAGGTGGCAAGCGTTATCCGGATTTACTGGGTGTAAAGGGCGTGTAGGCGGGATTGCAAGTCAGATGTGAAAAGT  
GGGGCTCAACCTCCAGCCTGCATTTGAAACTGTAGTCTTAGAGTGTGGAGAGGCAATCGGAATTCCTGTGTAGCGGTG  
AAATGCGTAGATATACGGAGGAATACCAGTGGCGAAGGCGGCCCTTGACGATCACTGACGTTGAGGCTCGAAAGCGTG  
GGGAG

>ASV:4809:Genus:Allisonella

TACGTAGGTGGCAAGCGTTGTCCGGAATTATTGGGCGTAAAGCGCGCAGGCGGCCGTGCAAGTCCATCTTAAAAGCGT  
GGGGCTTAAACCCATGAGGGGATGAAACTGCAGGCTGGAGTGTGCGAGGGGAAAGGGGAATTCAGTGTAGCGGTGA  
AATGCGTAGATATTGGAGGAACACCAGTGGCGAAGGCGCCTTCTGGACTGTGTCTGACGCTGAGATGCGAAAGCATGG  
GTAGC

>ASV:4810:Genus:Turicibacter

AACGTAGGTCACAAGCGTTGTCCGGATTTACTGGGTGTAAAGGGCGTGTAGCCGGGAGGGCAAGTCTGATGTGAAAGCCCA  
CGGCTTAAACCTGGAGGCTATTGAAACTGGTCGACTTAGTGCAGAAGAGGGAAGTGAATTCATGTGTAGCGGTGA  
AATGCGTAGATATATGGAGGAACACCAGTGGCGAAGGCGGCTTCTGGTCTGTAACGACACTGAGGCGGAAAGCGTG  
GGAGC

>ASV:4811:Genus:Oscillibacter

TACGTAGGTGGCGAGCGTTATCCGGATTTACTGGGTGTAAAGGGCGTGCAGCCGGGCTGGTAAGTCAGATGTGAAATCTG  
GAGGCTTAACTGAGTGTGCATTTGAAACTGCTGGTCTTAGTACCAGGAGGTTATCGGAATTCCTTGTGTAGCGGTG  
AAATGCGTAGATATAAGGAAGAATCCGATTGCGAAGGCAGCTTACTAAACCATAACTGACACTGAAGCACGAAAGCGTG  
GGGAT

>ASV:4812:Genus:Clostridium\_sensu\_stricto\_1

CACGTAGGTGGCGAGCGTTGTCCGGATTTACTGGGCGTAAAGGGAGCGTAGGCGGATTTTAAAGTGAATGTGAAATACT  
CGGGCTTAACTGAGTGTGCATTTGAAACTGGAAGCTTAGAGTGCAGGAGAGGAAAGGGAATTCCTAGTGTAGCGGTG  
AAATGCGTAGATATATGGAGGAACACCAGTGGCGAAGGCGGCTTCTGGACTGTGTCTGACGCTGAGATGCGAAAGCCAG  
GGGAG

>ASV:4813:Genus:Parvimonas

TACGTATGGGGCGAGCGTTGTCCGGAATTATTGGGCGTAAAGGGTACGTAGGCGGCTTTTAAAGTCAGGTGTGAAAGCGT  
GAGGCTTAACTTAACTGAGTGTGCATTTGAAACTGGAAGCTTAGAGTGAAGGAGAGGAAAGTGAATTCCTAGTGTAGCGGTG  
AATGCGTAGATATTAGGAGGAATACCAGTGGCGAAGGCGGCTTCTGGACTGTGTCTGACGCTGAGATGCGAAAGCCAG  
GTAGC

>ASV:4814:Genus:Tyzzerella

TACGTAGGGGGCAAGCGTTATCCGGAATTACTGGGTGTAAAGGGAGAGTAGGCGGCATGGTAAGTTAGATGTGAAAGCCT  
CGGGCTTAACTGAGGATTGCATTTAAAAGTATCAAGCTAGAGTGCAGGAGAGGAAAGCGGAATTCCTAGTGTAGCGGTG  
AAATGCGTAGATATTAGGAAGAACACCAGTGGCGAAGGCGGCTTCTGGACTGAAACTGACGCTGAGGCTCGAAAGCGTG  
GGGAG

>ASV:4815:Family:Gemmataceae

TACGAACCGAGCGAACGTTGTTCCGGAATCACTGGGCTTAAAGGGCGCGTAGGCGGGCGGTCAAGTCGAGGGTGAAGCC  
CCAGCTCAACTGGGGAAAGTGCCTCCGATACTGGCGTCTCGAGGGGGTAGGGGCTGCGGAATTCCTAGTGTAGCGGTG  
AAATGCGTAGATATCGGAAGGAACATCGGTGGCGAAGGCGGCGCTGGATCCCTTCTGACGCTGAGGCGGAAAGCCAG  
GGGAG

>ASV:4816:Genus:Ezakiella

TACGTAAAGGGCGAGCGTTGTCCGGAATTATTGGGCGTAAAGAGTGCCTAGGCGGCAATCAAGTCAGATGTGAAAAGT  
AGGGCTCAACCATAGATTGCATCTGAAACTGATATGCTTAGTCAAGGAGAGGAAAGTGAATTCCTAGTGTAGCGGTG  
GAATGCGTAGATATTAGGAGGAATACCAGTGGCGAAGGCGACTTCTGGACTTGAACGACGCTGAGGCGGAAAGCGTG  
GGGAG

>ASV:4817:Species:adhaesivum

TACGAAGGGGGCTAGCGTTGCTCGGAATCACTGGGCGTAAAGGGCGCGTAGGCGGCCATTCAAGTCGGGGGTGAAAGCCT  
GTGGCTCAACACAGAAATTGCCTTCGATACTGTTGGCTTAGTCTGGTAGAGGTTGGTGAAGTGCAGTGTAGAGGTG  
AAATTCGTAGATATTGCAAGAACACCAGTGGCGAAGGCGGCAACTGGACCAGTACTGACGCTGAGGCGGAAAGCGTG

GGGAG

>ASV:4818:Genus:Fusicatenibacter

TACGTAGGGGGCAAGCGTTATCCGGATTTACTGGGTGTAAGGGGAGCGTAGACGGCAAGCAAGTCTGATGTGAAAACCC  
AGGGCTTAACCTGGGACTGCATTTGAAACTGTTGACTCGAGTGCCGGAGAGGTAAGCGGAATTCCTAGTGTAGCGGTG  
AAATGCGTAGATATCACGAAGAAGTCCGATTGCGAAGGCAGCCTGCTAAGCTGCAACTGACATTGAGGCTCGAAAGTGTG  
GGTAT

>ASV:4819:Family:Ruminococcaceae

TACGTAGGTGGCAAGCGTTGTCCGGATTTACTGGGTGTAAGGGGCGTGTAGCCGGTGGCAAGTCAGATGTGAAATCTG  
GAGGCTCAACCTCAAAGTGCATTTGAAACTGTTGATCTTGAGTATCGGAGAGGTAATCGGAATTCCTAGTGTAGCGGTG  
GAATGCGTAGATATCGGGAGGAACACCAGTGGCGAAGGCAGCCTACTGGGCACTAACTGACGCTGAGGCTCGAAAGCATG  
GGTAG

>ASV:4820:Order:Clostridiales

TACGTAGGGGGCAAGCGTTATCCGGATTTACTGGGTGTAAGGGTGCCTAGGCGGCCCGCAAGTTTGTATGTGAAAACCT  
TAGGCTTAACCTGTGGCATGCATCAAAAAGTACCGAGCTAGAGTGCAGGAGAGGAAAGCGGAATTCCTAGTGTAGCGGTG  
AAATGCGTAGATATTAGGAAGAACACCAGTGGCGAAGGCAGCCTTCTGGACTGCAACTGACGCTGAAGCACGAAAGCGTG  
GGGAG

>ASV:4821:Family:Lachnospiraceae

TACGGAGGGTTCAAGCGTTATCCGGATTTATTGGGTTAAAGGGAGCGTAGACGGCAAGCAAGTCTGAAGTAAAACCC  
AGGGCTCAACCTGGGACTGCTTTGAAACTGTTTTGCTAGAGTGTCCGGAGAGGTAAGCGGAATTCCTAGTGTAGCGGTG  
AAATGCTTAGATATCACGAAGAAGTCCGATTGCGAAGGCAGCCTGCTAAGCTGCAACTGACATTGAGGCTCGAAAGTGTG  
GGTAT

>ASV:4822:Family:Ruminococcaceae

TACGGAGGATCCGAGCGTTATCCGGATTTATTGGGTTAAAGGGAGCGTAGATGGGACTGCAAGTTGGATGTGAAATACC  
GTGGCTTAACACCGAACTGCATCAAAAAGTGTAGTCTTGAGTGAAGTAGAGGCAAGCGGAATTCGAGTGTAGCGGTG  
AAATGCGTAGATATTCGGAGGAACACCAGTGGCGAAGGCAGCCTGCTGGACGATGACTGACGTTGAGGCTCGAAAGCGTG  
GGGAG

>ASV:4823:Family:Lachnospiraceae

TACGTAGGATGCAAGCGTTATCCGGATTTACTGGGTGTAAGGGTGCCTAGGTGACATGGTAAGTCAAGAAGTAAAAGCC  
GGGGCTTAACCCGGGACTGCTTTGAAACTGTCATGCTGGAGTGCAGGAGAGGTAAGCGGAATTCCTAGTGTAGCGGTG  
AAATGCGTAGATATCGGGAAGAACACCAATGGCGAAGGCAGTCTCTGGGCCGTTACTGACGCTGAGGAGCGAAAGCGTG  
GGGAG

>ASV:4824:Family:Lachnospiraceae

TACGTAGGGGGCAAGCGTTATCCGGATTTACTGGGTGTAAGGGAGCGTAGACGGATGGACAAGTCTGAAGTAAAAGGCA  
TGGGCTCAACCTGTGGACTGCTTTGAAAGTGTGCAGCTAGAGTGTCCGGAGAGGTAAGTGGAAATTCCTAGTGTAGCGGTG  
AAATGCTTAGATATCACGAAGAAGTCCGATTGCGAAGGCAGCCTGCTAAGCTGCAACTGACATTGAGGCTCGAAAGTGTG  
GGTAT

>ASV:4825:Family:Bifidobacteriaceae

AACGTAGGGTGAAGCGTTGTCCGGATTTACTGGGTTAAAGGGAGCGTAGGCGGACGCTTAAGTCAAGTGTGAAAAGTTT  
GCGGCTCAACCGTAAAATTGCAGTTGATACTGGGTGTCTTGAGTGCAGTGGGAGACTGGAATTCGCGGTGTAAACGGTG  
GAATGTGTAGATATCGGGAAGAACACCAATGGCGAAGGCAGTCTCTGGGCCGTTACTGACGCTGAGGAGCGAAAGCGTA  
GGGAG

>ASV:4826:Genus:Prevotella\_6

TACGGAAAGTCCGGGCTTATCCGGATTTATTGGGTTAAAGGGAGTGTAGGCGGTCTGTTAAGCGTGTGTGAAATGTA  
GATGCTCAACATCTGAAGTGCAGCGCAACTGGCTGGCTTGAGTACACGCAACGTGGGCGGAATTCATGGTGTAGCGGTG  
AAATGCTTAGATATCATGAGGAAGTCCATTGCGAAGGCAGCTACGGGAGTGTCACTGACGCTTAAGCTCGAAGGTGCG  
GGTAT

>ASV:4827:Family:Bifidobacteriaceae

TACGTAGGGGGCAAGCGTTATCCGGATTTACTGGGTGTAAGGGGAGCGTAGACGGTGTGGCAAGTCTGATGTGAAAGGCA  
TGGGCTCAACCGTGGATCCGCGCCGGGTACGGGCGGGCTTGAGTGCAGTGGGAGACTGGAATTCGCGGTGTAAACGGTG  
GAATGTGGAGATATCGGGAAGAACACCAATGGCGAAGGCAGTCTCTGGGCCGTTACTGACGCTGAGGAGCGAAAGCGTG  
GGGAG

>ASV:4828:Family:Ruminococcaceae

TACGTAGGTGGCAAGCGTTGTCCGGATTTACTGGGTGTAAGGGGAGCGCAGGCGGGAGAGCAAGTTGGAAGTGAATCTG  
TGGGCTCAACTCACAATTGCTTTCAAAGTGTGTTTTCTTGAGTGGTGTAGAGGTAGCGGAATTCGTTGGTGTAGCGGTG  
AAATGCTTAGATATCACGAAGAAGTCCGATTGCGAAGGCAGCCTGCTAAGCTGCAACTGACATTGAGGCTCGAAAGTGTG  
GGTAT

>ASV:4829:Family:Ruminococcaceae

TACGTACGGAGCAAGCGTTATCCGGATTTACTGGGTGTAAGGGTGCCTAGGTGGCAGTGCAGTCAAGTCAAGTGTGAAAGGCC  
GGGGCTCAACCCGGAGCTGCATTTGAAACTGTTTAGCTTGAGTGAAGTAGAGGTAGCGGAATTCGCGGTGTAGCGGTG  
AAATGCGTAGAGATCGGGAGGAACACCAGTGGCGAAGGCAGCCTACTGGGCTTAACTGACGCTGAGGACGAAAGCATG  
GGTAG

>ASV:4830:Phylum:Firmicutes

TACGGAGGGTGCAGCGTTATCCGGATTTACTGGGTGTAAGGGTGCCTAGGTGGTATGGCAAGTCAAGAAGTAAAACCC  
AGGGCTTAACCTCGGACTGCTTTGAAACTGTCAAAGTGTAGTGCAGAAAGGGAGAGTGGAAATTCATGTGTAGCGGTG  
AAATGCGTAGATATATGAGGAACACCAGTGGCGAAGGCAGCCTCTGGTCTGTAAGTGCAGCTGAGGCTCGAAAGCGTG  
GGGAG

>ASV:4831:Family:Lachnospiraceae

TACGTAGGGAGCGAGCGTTGTCCGGATTTACTGGGTGTAAGGGGAGCGTAGGCGGGATCGCAAGTCAAGTGTGAAAACCTA

TGGGCTCAACCCGGTACTGCATTTGAACTGTCTAGCTAGAGTGCAGGAGAGGTAAGCGGAATTCCTAGTGTAGCGGTG  
AAATGCGTAGATATTAGGAGGAACACCAATGGCGAAGGCGACTTACTGGACTGCTACTGACACTGAGGCACGAAAGCGTG  
GGGAG

>ASV:4832:Genus:Ruminococcaceae\_NK4A214\_group

TACGTAGGGAGCAAGCGTTATCCGGATTTACTGGGTGTAAGGGCGCGTAGGCGGGATGCAAGTCAGATGTGAAATCTA  
TGGGCTTAACCCATAAACTGCATTTGAACTGTATCTCTTGGAGTGTGGAGAGGTAGACGGAATTCCTTGTGTAGCGGTG  
AAATGCGTAGATATAAGGAAGAACACCAAGTGGCGAAGGCGGCTACTGGGCAACACTGACGCTGAGGCTCGAAAGTGTG  
GGTAG

>ASV:4833:Family:Lachnospiraceae

AACGTAGGTCACAAGCGTTCGTCGGGAATTACTGGGTGTAAGGGAGCGTAGACGGCAAGGCAAGTCTGATGTGAAAACCC  
AGGGCTTAACCTGGGACTGCATTGAAACTGTCTGGCTTGGAGTGCAGGAGGTAAGCGGAATTCCTAGTGTAGCGGTG  
AAATGCGTAGATATCACGAAGAATCCGATTGCGAAGGCGAGCTTGTGGACTGTAACGACGCTGATGCTCGAAAGTGTG  
GGTAT

>ASV:4834:Genus:Bacteroides

TACTTCTTCTCTCTCTTTCTCTTTCTTTCTTTTTTCCCTTTCTTCTTCTTTCTTTTCTTTTCTTTTCTTTTCTTTT  
GCGGCTCAACCGTAAAATTGCAGTTGATACTGGATATCTTGGAGTGCAGTTGAGGCAGGCGGAATTCGTGGTGTAGCGGTG  
AAATGCTTAGATATCACGAAGAATCCGATTGCGAAGGCGAGCTTGTGGACTGTAACGACGCTGATGCTCGAAAGTGTG  
GGTAT

>ASV:4835:Family:Bifidobacteriaceae

TACGTAGGGGCAAGCGTTGTCCGGAATAATTGGGCGTAAAGGGCGCGTAGGCGGCTCGGTAAGTCTGGAGTAAAAGTCC  
TGCTTTTAAAGTGGGAATTGCTTTAGATACTGTCGGCTTGGAGTGCAGGAGGAGACTGGAATTCCTGGTGTAAACGGTG  
GAATGTGTAGATATCGGAAGAACACCAATGGCGAAGGCGAGTCTCTGGGCCGTTACTGACGCTGAGGAGCGAAAGCGTG  
GGGAG

>ASV:4836:Genus:Actinomyces

TACGTAGGGCGCGAGCGTTGTCCGGAATTTATTGGGCGTAAAGGGCTTGTAGGCGGCTGGTCCGCTGTGTGTAATCCT  
CTGGCTCAGCTGGGGCGTGCAGTGGGTACGGCTGGCTTGGAGTGCAGGAGGAGGCTGGAATTCCTGGTGTAGCGGTG  
GAATGCGCAGATATCAGGAGGAACACCGTGGCGAAGGCGGGTCTCTGGGCCGTTACTGACGCTGAGGAGCGAAAGCGTG  
GGGAG

>ASV:4837:Genus:Holdemanelia

TACGTAGGTGGCGAGCGTTATCCGGAATGATTGGGCGTAAAGGGTGCCTAGGTGGCAGATCAAGTCTGGAGTAAAAGGTA  
TGGGCTCAACCCGACTTTGCTCTGGAACTGATCAGCTAGAGAACAGAGAGGACGGCGGAATTCATGTGTAGCGGTAA  
AATGCGTAGATATATGGAAGAACACCGGTGGCGAAGGCGGCCGCTAGTCTGGATTCTGACACTGAAGCACGAAAGCGTG  
GGGAG

>ASV:4838:Genus:Ohtaekwangia

TACGTAGGTGGCAAGCGTTGTCCGGATTTATTGGGTTTAAAGGGTGCCTAGGCGGCCTTATAAGTCAAGTGTGAAATATC  
CCGGCTTAACCGGAGGGTGGCATTGATACTGAGGGCTTGGAGTAAAGTTGAGGTAGGCGGAATTCACGGTGTAGCGGTG  
AAATGCTTAGATATCGTCAAGAACACCGATAGTGAAGACAGCTTAACTTTAACTGACGCTGAGGCACGAAAGTGTG  
GGGAT

>ASV:4839:Family:Ruminococcaceae

TACGTAGGGAGCGAGCGTTGTCCGGAATTTACTGGGTGTAAGGGAGCGTAGGCGGGAAGCAAGTTGGAAGTAAAATGCA  
TGGGCTTAACCCATGAGCTGCTTTCAAACCTGTTTTCTTGGAGTGAAGTAGAGGCGAGGCGGAATTCCTAGTGTAGCGGTG  
AAATGCGTAGATATTAGGAGGAACACCAAGTGGCGAAGGCGGCTGCTGGGCTTTAACTGACGCTGAGGCTCGAAAGCGTT  
GGTAG

>ASV:4840:Genus:Azonexus

TACGTAGGGTGCAGCGTTAATCCGGAATTTACTGGGCGTAAAGCGTGCAGGCGGTTTTTTAAGATAGGCGTAAAATCCC  
CGGGCTTAACCTGGGAAGTGCCTTATGACTGGAAGACTAGAGTACGGCAGAGGGGGTGAATTCACGCTGTAGCAGTG  
AAATGCGTAGATATGAGGAGGAACACCGATGGCGAAGGCGGCTTACTGGGCTTTAACTGACGCTCATGCACGAAAGCGTG  
GGGAG

>ASV:4841:Family:Lachnospiraceae

TACGTAGGGGCAAGCGTTATCCGGATTTACTGGGTGTAAGGGAGCGTAGACGGCTCTGCAAGTCTGGAGTAAAACCC  
GGGGCTCAACCTGGGACTGCTTTGAAACTGTGGAGCTTGGAGTACGGAGGGGTAAAGCGGAATTCCTAGTGTAGCGGTG  
AAATGCGTAGATATTAGGAGGAACACCAAGTGGCGAAGGCGGCTGCTGGGCTTTAACTGACGCTGAGGCACGAAAGCATG  
GGGAG

>ASV:4842:Family:Ruminococcaceae

AACGTAGGTCACAAGCGTTCGTCGGGAATTACTGGGTGTAAGGGAGCGCAGGCGGGAAGACAAGTTGGAAGTAAAATCTA  
TGGGCTCAACCCATAAACTGCTTTCAAACCTGTTTTCTTGGAGTGTGGAGAGGCAAGCGGAATTCCTAGTGTAGCGGTG  
AAATGCGTAGATATTAGGAGGAACACCAAGTGGCGAAGGCGGCTTACTGGACAGTAACTGACGTTGAGGCTCGAAAGCGTG  
GGGAG

>ASV:4843:Family:Lachnospiraceae

TACGTAGGGGCAAGCGTTATCCGGATTTACTGGGTGTAAGGGAGCGTAGACGGCGGCGCAAGTCTGATGTGAAAGCCT  
GGGGCTCAACCCGGAAGTGCATTGAAACTGTGCTGCTAGAGTGCAGGAGGTAAGCGGAATTCCTAGTGTAGCGGTG  
AAATGCGTAGATATTAGGAGGAACACCAAGTGGCGAAGGCGGCTTACTGGACAGTAACTGACGTTGAGGCTCGAAAGCGTG  
GGGAG

>ASV:4844:Family:Ruminococcaceae

TACGTAGGTGGCAAGCGTTGTCCGGAATTTACTGGGTGTAAGGGAGCGTAGGCGGGAATGCAAGTTGAATGTTAAATCTA  
CCGGCTCAACTGGTAGCAGCGTTCAAACCTGATTTCTTGGAGTGAAGTAGAGGCAAGCGGAATTCCTAGTGTAGCGGTG  
AATGCGTAGATATTAGGAGGAACACCAAGTGGCGAAGGCGGCTGCTGGGCTTTTACTGACGCTGAGGCTCGAAAGCGTG  
GGAGC

>ASV:4845:Genus:Kandleria  
TACGTAGGTGGCGAGCGTTATCCGGAATCATTGGGCGTAAAGGGTGCCTAGGCGGCGAGTTAAGTCTGAGGTAAGAGTT  
GCAGCTCAACCTGTAACAAGCCTTTGAAACTGACTGGCTAGAGTGCAGGAGAGGGCAGTGGAAATCCATGTGTAGCGGTAA  
AATGCGTAGATATATGGAGGAACACCAGTGGCGAAGGCGACGGTCTGGGCCGCAACTGACGCTCATTCCGAAAGCGTGG  
GGAGC

>ASV:4846:Family:Ruminococcaceae  
TACGTAGGGAGCGAGCGTTGTCCGGATTTACTGGGTGTAAGGGTGCCTAGGCGGCTCTGCAAGTCAGTCGTGAAAACCA  
TGGGCTCAACCTGTGGACTGCTTTGAAACTGTGCAGCTAGAGTGTGCGAGAGGTAAGTGGAAATCCCGGTGTAGCGGTG  
AAATGCATAGAGATCGGGAGGAACACCAGTGGCGAAGGCGGCTGCTGGGCTTTAACTGACGCTGAGGCACGAAAGTATG  
GGTAG

>ASV:4847:Genus:Holdemania  
AACGTAGGTGGCGAGCGTTATCCGGAATTATTGGGCGTAAAGGGTGCCTAGGCGGCTTTGTTAAGTTAAGGTGAAAGCGT  
GGGCTTAACCTATAGCCTTAGAACTGACAGACTAGAGTACAGGAGAGGGCAATGGAATTCATGTGTAGCGGTAA  
AATGCGTAGATATATGGAGGAACACCAGTGGCGAAGGCGGCTACTGGGCACCAACTGACGCTGAGGCTCGAAAGCATGG  
GTAGC

>ASV:4848:Family:Lachnospiraceae  
TACGTAGGGGCAAGCGTTATCCGGATTTACTGGGTGTAAGGGAGCGTAGACGGTGTGGCAAGTCGTATGTGAAAGGCA  
TGGGCTCAACCTGTGGACTGCTTTGAAACTGTGCAGCTAGAGTGTGCGAGAGGTAAGTGGAAATCCAGTGTAGCGGTG  
AAATGCGTAGAGATCGGGAGGAACACCAGTGGCGAAGGCGGCTGCTGGGCTTTAACTGACGCTGAGGCACGAAAGCGTG  
GGTAG

>ASV:4849:Genus:Anaerofilum  
TACGTAGGATGCAAGCGTTATCCGGATTTACTGGGTGTAAGGGAGCGTAGGCGGCTGTACAAGTCAGAAGTGAAGCGCC  
GGGCTCAACCTCGGGACTGCTTTCAAACCTGTTTTCTTGAGTAGTGCAGAGGTAGGCGGAATTCCTAGTGTAGCGGTG  
GAATGCGTAGATATCGGGAGGAACACCAGTGGCGAAGGCGGCTACTGGGCACCAACTGACGCTGAGGCTCGAAAGCGTG  
GGGAG

>ASV:4850:Family:Ruminococcaceae  
TACGTAAAGGGCAAGCGTTATCCGGATTTACTGGGTGTAAGGGAGCGTAGGCGGATTGCAAGTTGAATGTTAAATCTA  
TGGGCTCAACCTCGGGACTGCTTTCAAACCTGCAGTCTTGAGTGAAGTAGAGGCAAGCGGAATTCCTAGTGTAGCGGTG  
AATGCGTAGATATTAGGAGGAACACCAGTGGCGAAGGCGGCTTCTGGGCTTTACTGACGCTGAGGCTCGAAAGCGTGG  
GGAGC

>ASV:4851:Family:Ruminococcaceae  
AACGTAGGGTGCAGCGTTGTCCGGAATTACTGGGTGTAAGGGAGCGCAGGCGGGAAGGCAAGTTGGAAGTGAATCCA  
TGGGCTCAACCCATGAAGTGTCTTTCAAACCTGCAGTCTTGAGTGTGAGAGGCAAGCGGAATTCCTAGTGTAGCGGTG  
AAATGCGTAGATATCACGCAGAACTCAATTGCGAAGGCGGCTTACTAACTATAACTGACACTGAAGCACGAAAGCGTG  
GGGAT

>ASV:4852:Family:Ruminococcaceae  
TACGTAGGTGGCGAGCGTTGTCCGGAATTACTGGGTGTAAGGGCGTGTAGGCGGGACTTTAAGTCAGATGTGAAATACC  
CGGGCTTAACCTCGGGAGGTGCATTTGAAACTGAGTCTTGAGTGCAGGAGAGGAAAGCGGAATTCCTAGTGTAGCGGTG  
AAATGCATAGATATTAGGAGGAACACCAGTGGCGAAGGCGGCTTCTGGACTGTAAGTACGCTGAGGCGGAAAGCGTG  
GGGAG

>ASV:4853:Family:Ruminococcaceae  
TACGGAGGATCCGAGCGTTGTCCGGAATTACTGGGTGTAAGGGAGCGCAGGCGGACCGGCAAGTTGGAAGTGAATCTA  
TGGGCTCAACCCATAAACTGCTTTCAAACCTGTTTTCTTGAGTAGTGCAGAGGTAGGTGGAATTCCTAGTGTAGCGGTG  
GAATGCGTAGATATCGGGAGGAACACCAGTGGCGAAGGCGGCTTCTGGACTGTGCTGACGCTGAGATGCGAAAGCCAG  
GGTAG

>ASV:4854:Family:Lachnospiraceae  
TACGTAGGGGCAAGCGTTGTCCGGATTTACTGGGTGTAAGGGCGTGCAGCCGGGCGGCAAGTCAGATGTGAAATCTG  
GAGGCTTAACCTCAAACCTGCATTTGAAACTGTCAGACTGGAGTGCAGGAGAGGTAAGCGGAATTCCTAGTGTAGCGGTG  
AAATGCGTAGATATTAGGAGGAACACCAGTGGCGAAGGCGGCTTACTGGACGATAACTGACGCTGAGGCTCGAAAGCGTG  
GGGAG

>ASV:4855:Genus:Clostridium\_sensu\_stricto\_1  
TACGTAGGTGGCAAGCGTTGTCCGGATTTACTGGGCGTAAAGGGAGCGTAGGCGGATTTTAAAGTGTGAGATGTGAAATACC  
CGGGCTTAACCTGGGTGCTGCATTTCAAACCTGGAAGTCTAGAGTGCAGGAGAGGAGAAGGGAATTCCTAGTGTAGCGGTG  
AAATGTGTAGAGATTAGGAAGAACACCAGTGGCGAAGGCGGCTTCTCTGGACTGTAAGTACGCTGAGGCTCGAAAGCGTG  
GGGAG

>ASV:4856:Family:Lachnospiraceae  
TACGGAAGGTCGGGCGTTATCCGGATTTACTGGGTGTAAGGGAGCGTAGACGGCTGTGCAAGTCGAAAGTGAAGGCA  
TGGGCTCAACCTGTGGACTGCATTTGAAACTGTCAGACTGGAGTACAGGAGAGGCAAGCGGAATTCCTAGTGTAGCGGTG  
AAATGCGTAGATATTAGGAGGAACACCAGTGGCGAAGGCGGCTGCTGGACTGTTACTGACACTGAGGCACGAAAGCGTG  
GGGAG

>ASV:4857:Genus:Erysipelatoclostridium  
TACGTAGGTGGCAAGCGTTATCCGGAATTATTGGGCGTAAAGAGGGAGCAGGCGGCAGCAAGGGTCTGTGGTGAAGCGCT  
GAAGCTTAACCTCAGTAAGCCATAGAAACCAGGCAGCTAGAGTGCAGGAGAGGATCGTGGAAATCCATGTGTAGCGGTGA  
AATGCGTAGATATATGGAGGAACACCAGTGGCGAAGGCGACCTACTGGGCACCAACTGACGCTGAGGCTCGAAAGCATGG  
GTAGC

>ASV:4858:Genus:Lactonifactor  
TACGTATGGTCAAGCGTTATCCGGATTTACTGGGTGTAAGGGAGCGCAGGCGGTGCGGCAAGTCGTATGTGAAATCCA  
TGGGCTCAACCCATGAAGTGCATTTGAAACTGTGGATCTTGAGTGTGCGAGGGGCAATCGGAATTCCTAGTGTAGCGGTG

AAATGCTTAGAGATCATAACAGAACACCGATTGCGAAGGCAGCTTACCAAACCTATATCTGACGTTGAGGCACGAAAGCGTG  
GGGAG  
>ASV:4859:Genus:Akkermansia  
TACGGAGGTCTCAAGCGTTGTTTCGGAATCACTGGGCGTAAAGCGTGCCTAGGCGGTTTCGTAAGTCGTGTGAAAGGCG  
GGGGCTCAACCCCGGACTGCACATGATACTGCGAGACTAGAGTAATGGAGGGGAACCGGAATTCGCGTGTAGCAGTG  
AAATGCGTAGATATGTGGAAGAACACCGATGGCGAAGGCAGCTCCTGGGACATAACTGACGCTCAGGCACGAAAGCGTG  
GGGAG  
>ASV:4860:Genus:GCA-900066755  
TACGTAGGGGGCAAGCGTTATCCGGATTTACTGGGTGTAAGGGAGCGTAGACGGAGCAGCAAGTCTGATGTGAAAACCC  
GGGGCTCAACCCCGGACTGCATTGAAAAGTGTGATCTGGAGTGCCGGAGAGGCAGGCGGAATTCCTAGTGTAGCGGTG  
AAATGCATAGATATCACTTGAACCCCGATAGCGAAGGCAGCTTCCAGGCTCGATCTGACGCTGATGCGCGAGAGCGTG  
GGTAG  
>ASV:4861:Family:Enterobacteriaceae  
TACGGAGGTGCAAGCGTTAATCGGAATTAAGCGCAGCGAGGCGGTCTGCAAGTCGGATGTGAAATCCC  
CGGGCTCAACCTGGAACTGCATTGAAAAGTGTGATCTGGAGTGCCGGAGAGGCAGGCGGAATTCCTAGTGTAGCGGTG  
AAATGCGTAGAGATCTGGAGGAATACCGGTGGCGAAGGCAGGCCCCCTGGACAAGACTGACGCTCAGGTGCGAAAGCGTG  
GGGAG  
>ASV:4862:Genus:Agathobacter  
TACGTATGGTCAAGCGTTATCCGGATTTACTGGGTGTAAGGGAGCGCAGGCGGTGCGGCAAGTCTGATGTGAAAACCC  
GGGGCTCAACCCCGGACTGCATTGAAAAGTGTGATCTGGAGTGCCGGAGAGGCAGGCGGAATTCCTAGTGTAGCGGTG  
AAATGCGTAGATGTATGGAGGAACACCAAGTGGCGAAGGCAGGTTCTCTGGCCTGTAAGTACGCTCATGACGAAAGCGTG  
GGGAG  
>ASV:4863:Genus:Bifidobacterium  
CACGTATGGTCAAGCGTTATCCGGATTTACTGGGTGTAAGGGAGCGCAGGCGGAAGGCTAAGTCTGATGTGAAAAGTCC  
ATCGCTTAACCGTGGATCCGCGCCGGGTACGGGCGGGCTTGGAGTGGGTAGGGGAGACTGGAATTCGCGGTGTACCGGTG  
GAATGTGTAGATATCGGGAAGAACACCAATGGCGAAGGCAGGTTCTCTGGGCCGTTACTGACGCTGAGGAGCGAAAGCGTG  
GGGAG  
>ASV:4864:Phylum:Firmicutes  
TACGGAGGATCCGAGCGTTATCCGGATTTATTGGGTTTAAAGGGAGCGTAGGTGGATTGTTAAGTCAGTTGTGAAAAGTTT  
GCGGGCTCAACCCATAAATTGCTTTCAAAGTCTGGCCTTGGAGTAGTGCAGAGGTAGGTGGAATTCGCGGTGTAGCGGTG  
GAATGCGTAGATATCGGAGGAACACCAAGTGGCGAAGGCAGCTACTGGGCTTAACTGACGCTGAGGCACGAAAGCGTG  
GGTAG  
>ASV:4865:Genus:Coprobacillus  
AACGTAGGTGCAAGCGTTGTCGGAATTAAGGGAGCGCAGGCGCAATAGAGGTCTGCGGTGAAAGCCT  
GAAGCTAAACTTCAGTAAGCGGTGGAACCAATAGCTAGAGTGCAGTAGAGGATCGTGGAATTCATGTGTAGCGGTGA  
AATGTGTAGATATCGGGAAGAACACCAATGGCGAAGGCAGGTTCTCTGGGCCGTTACTGACGCTGAGGAGCGAAAGCGTG  
GAGCG  
>ASV:4866:Genus:Parabacteroides  
TACGGAGGATCCGAGCGTTATCCGGATTTATTGGGTTTAAAGGGTGCCTAGGCGGCCCTTTAAGTCAGCGGTGAAAAGTCT  
GTGGCTCAACCATAGAATTGCCGTTGAAAAGTGGGAGGCTTGGAGTATGTTTGGAGGAGCGGAATTCGCGGTGTAGCGGTG  
AAATGCGTAGAGATCTGGAGGAATACCGGTGGCGAAGGCAGGCCCCCTGGACGAAGACTGACGCTCAGGTGCGAAAGCGTG  
GGGAG  
>ASV:4867:Family:Ruminococcaceae  
TACGTAGGTGCAAGCGTTGTCGGAATTAAGGGAGCGTAGCCGGGAAGGCAAGTCAGATGTGAAATCCA  
CGGGCTCAACTCGTGAAGTGCATTTGAAAAGTGTGTTTCTTGGAGTATCGGAGAGGCAATCGGAATTCCTAGTGTAGCGGTG  
AAATGCGTAGATATCGGAGGAACACCAAGTGGCGAAGGCAGGCTGCTGGACTGTTACTGACGCTGAGGAGCGAAAGCGTG  
GGGAG  
>ASV:4868:Family:Ruminococcaceae  
TACGTATGGTCAAGCGTTGTCGGAATTAAGGGAGCGCAGGCGGGCCGGAAGTTGGAAGTGAATCTA  
TGGGCTTAACCCATAAAGTGTGTTCAAAGTCTGGTCTTGGAGTATGGAGAGGCAGGCGGAATTCGCGTGTAGCGGTG  
AAATGCTTAGATATCACGAAGAAGTCCGATTGCGAAGGCAGCTGCTAAGCTGCAACTGACATTGAGGCTCGAAAGTGTG  
GGTAT  
>ASV:4869:Family:Lachnospiraceae  
TACGGAGGATCCGAGCGTTATCCGGATTTATTGGGTTTAAAGGGAGCGTAGACGGCGACGCAAGTCTGGAGTGAAGGCC  
GGGGCCCAACCCCGGACTGCTTTGAAAAGTGTAGGACTAGAGTGCAGGAGAGGTAAGTGAATTCCTAGTGTAGCGGTG  
AAATGCGTAGATATCACGAAGAAGTCCGATTGCGAAGGCAGCTTACTGGATTGTAAGTACGCTGATGCTCGAAAGTGTG  
GGTAT  
>ASV:4870:Genus:Coprococcus\_3  
TACGTATGGTCAAGCGTTATCCGGATTTACTGGGTGTAAGGGAGCGTAGACGGTAAAGCAAGTCTGAAGTGAAGGCC  
GGGGCTCAACCCCGGACTGCTTTGAAAAGTGTAGGACTAGAGTGCAGGAGAGGCAATCGGAATTCCTAGTGTAGCGGTG  
AAATGCGTAGATATTAGGAGGAACACCAAGTGGCGAAGGCAGGTTACTGGACGGTAACTGACGTTGAGGCTCGAAAGCGTG  
GGGAG  
>ASV:4871:Family:Lachnospiraceae  
TACGTAGGTGCAAGCGTTATCCGGATTAAGGGAGCGTAGGCGGCATGGTAAGCCAGATGTGAAAAGCCT  
TGGGCTTAACCCGAGGATTGCATTTGAAAAGTGTAGGACTAGAGTACAGGAGAGGAAAGCGGAATTCCTAGTGTAGCGGTG  
AAATGCTTAGATATCACGAAGAAGTCCGATTGCGAAGGCAGCTTACTAACCTGTAAGTACGCTGATGCGCGAAAGTGTG  
GGTAT  
>ASV:4872:Family:Lachnospiraceae

TACGTATGGAGCAAGCGTTATCCGGATTTACTGGGTGTAAAGGGAGCGTAGGCGGCTCTGCAAGTCTGATGTGAAAGCCC  
GGGGCTCAACCCCGTACTGCATTGAAAAGTGGTCATCTAGAGTGTCCGAGGGGTAAGTGGAATTCCTGGTGTAGCGGTG  
GAATGCGTAGATATCGGGAGGAACACCAGTGGCGAAGGCGGTCTACTGGGCACCAACTGACGCTGAGGCTCGAAAGCATG  
GGTAG  
>ASV:4873:Kingdom:Bacteria  
TACGTATGGTCAAGCGTTATCCGGATTTACTGGGTGTAAAGGGAGCGTAGACGGCATGGCAAGTCTGAAGTAAAAGCCC  
GGGGCTCAACCCGAACTGCTCTAATACTGTTGAGCTAGAGAGTAGTTGCGGTAGGCGGAATGTATGGTGTAGCGGTG  
AATGCTTAGAGATCATAAGAACACCGATTGCGAAGGCAGCCTGCTAAGCTGCAACTGACATTGAGGCTCGAAAGTGTG  
GGTAT  
>ASV:4874:Kingdom:Bacteria  
TACGTAGGGGGCAAGCGTTATCCGGATTTACTGGGTGTAAAGGGAGCGTAGGCGGGCAGTCAAGTCAAGCGGTCAAATGGC  
GCGGCTCAACCCGCTCCCGCGTTGAAACTGGCAGCCTTGTAGTATGCACAGGGATGCTGGAATTCATGGTGTAGCGGTG  
AATGCGTAGAGATCGGGAGGAACACCAGTGGCGAAGGCGGCTACTGGGCTTTAACTGACGCTGAGGCACGAAAGTGTG  
GTAGC  
>ASV:4875:Family:Lachnospiraceae  
TACGGAGGATTCAAGCGTTATCCGGATTTATTGGGTTAAAGGGTGCCTAGGCGGTTTGATAAGTTAGAGGTGAAATTC  
GGGGCTCAACCCCGTACTGCATTGAAAAGTGTCTACTAGAGTGTCCGAGGGGTAAGCGGAATTCCTAGTGTAGCGGTG  
AATGCGTAGATATTAGGAGGAACACCAGTGGCGAAGGCGGCTTACTGGACGAAAACCGACGCTGAGGCGCAAAGTGTG  
GGGAG  
>ASV:4876:Order:Clostridiales  
TACGTAGGGGGCGAGCGTTGTCCGGAATTACTGGGCGTAAAGGGCGCGTAGGCGGCCAATTAAGTTAGATGTGAAATCCC  
CGGGCTTAACCTGGGTGTTGCATTTAAACTGATAGGCTTGTAGTGCAGGAGAGGGAAGCGGAATTCCTAGTGTAGCGGTG  
AATGCGTAGATATTAGGAGGAACACCAGTGGCGAAGGCGACTTTCTGGACAGTAACTGACGTTGAGGCACGAAAGTGTG  
GGGAG  
>ASV:4877:Genus:Asaccharospora  
AACGTAGGGTCAAGCGTTGTCCGGAATTACTGGGTGTAAAGGGAGCGCAGGCGGTCTTTAAGTCAGGAGTGAAAGGCT  
ACGGCTCAACCGTAGTAAGCTTTGAAACTGGAGACTTGTAGTGCAGGAGAGGAGAGTGGAATTCCTAGTGTAGCGGTG  
AATGCGTAGATATCACGAAGAACTCCGATTGCGAAGGCGACTTACTGGAGTGTAACTGACGCTGATGCTCGAAAGTGTG  
GTATC  
>ASV:4878:Genus:Lachnospiraceae\_ND3007\_group  
TACGTAGGGGGCAAGCGTTATCCGGATTTACTGGGTGTAGAGGGAGCGTAGGTGGCAAGGCAAGCCAGAAGTGAAAACCC  
GGGGCTCAACCCGCGGATTGCTTTTGGAACTGTCTAGTGTAGAGGAGGGTGTAGCGGAATTCCTAGTGTAGCGGTG  
AATGCGTAGATATTGGGAGGAACACCAGTGGCGAAGGCGGCTTACTGGGCTGTAAGTACGCTGAGGCTCGAAAGCGTG  
GGTAG  
>ASV:4879:Family:Christensenellaceae  
TACGTAGGGAGCGAGCGTTGTCCGGAATTACTGGGCGTAAAGGGTGCCTAGGCGGCCGTTTAAAGTCAGATGTGAAAGACC  
CGTGCTTAACATGGGGTTGCAATTTGAAACTGGATGGCTTGTAGTGCAGGAGAGGCAAGTGGAATTCCTAGTGTAGCGGTG  
AATGCGTAGATATTAGGAGGAACACCAGTGGCGAAGGCGACTTGTGACTGTAAGTACGCTGAGGCACGAAAGCGTG  
GGGAG  
>ASV:4880:Order:Clostridiales  
AACGTAGGTCACAAGCGTTGTCCGATTTACTGGGTGTAAAGGGTGCCTAGGCGGCTTTGCAAGTCAGATGTGAAATCTA  
TGGGCTCAACCCATAAAGTGCATTTGAAACTGTAGAGCTTGTAGTGAAGTAGAGGTAAGCGGAATTCCTAGTGTAGCGGTG  
AATGCGTAGATATTGCGAGGAACACCAGTGGCGAAGGCGGCTTACTGGACGATGACTGACGTTGAGGCTCGAAAGCGTG  
GGGAG  
>ASV:4881:Family:Lachnospiraceae  
TACGTAGGGGGCAAGCGTTATCCGGATTTACTGGGTGTAAAGGGAGCGTAGACGGCATGGCAAGCCAGATGTGAAAGCCC  
GGGGCTCAACCCCGGACTGCTTTTGGAACTGTCAAGCTAGAGTGTCCGAGAGGAAAGCGGAATTCCTAGTGTAGCGGTG  
AATGCGTAGATATTAGGAGGAACACCAGTGGCGAAGGCGGCTACTAGACTGTTACTGACACTGATGCTCGAAAGTGTG  
GGTAT  
>ASV:4882:Genus:Ruminiclostridium  
TACGGAGGATCCGAGCGTTGTCCGATTTACTGGGTGTAAAGGGCGTGCAGCCGGCCGGCAAGTCAGATGTGAAATCTG  
GAGGCTTAACCTCAAAGTGCATTTGAAACTGTAGGCTTGTAGTACCAGGAGAGGCGAGCGGAATTCCTAGTGTAGCGGTG  
AATGCGTAGATATTAGGAGGAACACCAGTGGCGAAGGCGGTCTGCTGGACAGCAACTGACGCTGAGGCGCAAAGCGTG  
GGGAG  
>ASV:4883:Family:Lachnospiraceae  
TACGGAGGATCCGAGCGTTATCCGGATTTATTGGGTTAAAGGGAGTGTAGGTGGCCATGCAAGTCAGAAGTGAAAATCC  
GGGGCTCAACCCCGGACTGCTTTTGGAACTGTGAGGCTAGAGTGCAGGAGGGGTGAGTGGAATTCCTAGTGTAGCGGTG  
AATGCGTAGATATTAGGAGGAACACCAGTGGCGAAGGCGGCTACTGGACTGTAAGTACATTGATGCTCGAAAGTGTG  
GGTAT  
>ASV:4884:Genus:Christensenellaceae\_R-7\_group  
TACGTAGGGGGCAAGCGTTGTCCGGAATGACTGGGCGTAAAGGGCGTGTAGGCGGCTGATAAGTATGAAGTAAAAGTCC  
TGCTTTCAAGGTGGGAATTGCTTTGTAGACTGTCCGGCTTGTAGTGCAGGAGAGGTAAGTGGAATTCCTAGTGTAGCGGTG  
AATGCGTAGAGATTGGGAGGAACACCAGTGGCGAAGGCGGCTACTGGCCGTAAGTACGCTGAGGCGCAAAGCGTG  
GGGAG  
>ASV:4885:Genus:Odoribacter  
TACGGAGGATCCGAGCGTTATCCGGATTTATTGGGTTAAAGGGTGCCTAGGCGGTTTATTAAGTTAGTGGTTAAATATT  
TGAGCTAAACTCAATTGTGCCATTAATACTGGTAACTGGAGTACAGACGAGGTAGGCGGAATAAGTTAAGTGTAGCGGTG  
AATGCATAGATATAAGGAAGAACACCAGTGGCGAAGGCGGCTACTGGGCACCAACTGACGCTGAGGCTCGAAAGTGTG



GTAGC

>ASV:4886:Species:cinnamea/maris/papillomatosis

TACGTAGGGTGCAGCGTTGTCCGGAATTACTGGGCGTAAAGAGCTCGTAGGCGGTTTGTCCGCTCGTCCGTGAAAACCT  
GGAGCTTAACCCGAGCTTGCGGGCGATACGGGCAGACTTGAGTACTACAGGGGAGACTGGAATTCCTGGTGTAGCGGTG  
AAATGCGCAGATATCAGGAGGAACACCGGTGGCGAAGGCGGCTTCTGGGTAGTAACGACGCTGAGGAGCGAAAGCATG  
GGTAG

>ASV:4887:Genus:Lactobacillus

TACGTAGGTGGCAAGCGTTATCCGGATTTATTGGGCGTAAAGCGAGCGCAGGCGGTTTGATAAGTCTGATGTGAAAGCCT  
TTGGCTTAACCAAAGAAGTGCATCGGAAGCTGTCAGACTTGAGTGCAGAAGAGGACAGTGGAACCCCATGTGTAGCGGTG  
GAATGCGTAGATATATGGAAGAACACCAGTGGCGAAGGCGGCTTACTGGACTGTAACGACGTTGAGGCTCGAAAGTGTG  
GGTAT

>ASV:4888:Genus:Dorea

AACGTAGGGTGCAGCGTTGTCCGATTTACTGGGTGTAAGGGAGCGTAGACGGCACGGCAAGCCAGATGTGAAAGCCT  
GGGGCTCAACCCGGGACTGCATTTGAACTGCTGAGCTAGAGTGTGCGAGAGGCAAGTGAATTCCTAGTGTGGCGGTG  
AAATGCGTAGATATTAGGAGGAACACCAGTGGCGAAGGCGGCTTCTGGACTGTAACGACGCTGAAGCTCGAAAGCTAG  
GGTAG

>ASV:4889:Family:Clostridiales\_vadinBB60\_group

TACGTAGGAGGCAAGCGTTATCCGGAGTGACTGGGCGTAAAGGGTGCCTAGGTGGTTTGACAAGTTGGTAGCGTAATTC  
GAGGCTCAACCTCGGCACTACTACAAAAGTGTGGACTTGAGTGCAGGAGGGGCAACTGGAATTCCTAGTGTAGCGGTG  
GAATGCGTAGATATTAGGAGGAACACCAGTGGCGAAGGCGGCTTCTGGACTGTAACGACGCTGAGGCACGAAAGCGTG  
GGGAG

>ASV:4890:Family:Ruminococcaceae

TACGTAGGGAGCGAGCGTTGTCCGGAATTACTGGGTGTAAGGGCGTGTAGGCGGTTGCAAGTCAGATGTGAAATTC  
CGGGCTTAACCTCGGCGTTGCATTTGAACTGTAGATCTTGAGTGGTGGAGAGGAAAGCGGAATTCCTAGTGTAGCGGTG  
AAATGCGTAGATATTAGGAGGAACACCAGTGGCGAAGGCGGCTTCTGGACTGTAACGACGCTGAGGCACGAAAGCGTG  
GGGAG

>ASV:4891:Genus:Bacteroides

TACGGAGGATCCGAGCGTTATCCGGATTTATTGGGTTAAAGGGAGCGTAGGTGGATTGGCAAGTTGGAGTGAAATCTA  
TGGGCTCAACCATAAATTGCTTTCAAAGTGTAGTCTTGAGTGGTGTAGAGGTAGCGGAATTCCTGGTGTAGCGGTG  
AAATGCTTAGATATCACGAAGAACTCCGATTGCGAAGGCGGCTGCTAAGCTGCAACTGACATTGAGGCTCGAAAGTGTG  
GGTAT

>ASV:4892:Family:Ruminococcaceae

TACGTAGGTGGCAAGCGTTGTCCGGAATTACTGGGTGTAAGGGTGCAGGCGGATTGCAAGTTGGATGTGAAATACC  
GGGGCTTAACCCGAGCTGCATCCAAAAGTGTAGTCTTGAGTGGAGTAGAGGTAAGCGGAATTCAGTGTAGCGGTG  
AAATGCGTAGATATTGGAGGAACACCAGTGGCGAAGGCGGCTTACTGGGCTCTAAGTACGCTGAGGCACGAAAGCATG  
GGTAG

>ASV:4893:Genus:Mogibacterium

TACGTAGGGGGCAAGCGTTATCCGGAATTATTGGGCGTAAAGAGTGCCTAGGTGGTTACCTAAGCGCAAGGTTAATTTA  
GAGGCTCAACCTCTACTTGCCTTGCAGTGGGCTACTTGAGTGCAGGAGGGGAAAGCGGAATTCCTAGTGTAGCGGTGA  
AATGCGTAGATATTAGGAGGAACACCAGGCGGCGAAGGCGGCTTCTGGACTGTAACGACACTGAGGCACGAAAGCGTG  
GTAGC

>ASV:4894:Family:Acidaminococcaceae

TACGTAGGGAGCAAGCGTTGTCCGATTTATTGGGCGTAAAGAGCATGTAGGCGGTTAATAAGTCGAGCGTAAAATGC  
GGGGCTCAACCCGATGCGGCTGAAAGTGTAGGCTTGAGTGCAGGAGAGGAAAGGGGAATTCAGTGTAGCGGTGA  
AATGCTTAGATATCAGGAAGAACTCCGATTGCGAAGGCGGCTGCTGGACTGTAACGACGCTGATGCTCGAAAGCGTG  
GGAGC

>ASV:4895:Phylum:Firmicutes

TACGTAGGGGGCAAGCGTTGTCCGGAATTATTGGGCGTAAAGGGTGCCTAGGCGGCTCAAGTCAGGTGTGAAAGACC  
CGTGCTTAACATGGGGTTGCACTTAAAAGTGTGGCTTGAGTATGGGAGAGGCAAGCGGAATTCCTGGTGTAGCGGTG  
AAATGCGTAGAGATCGGGAGGAACACCAGTGGCGAAGGCGGCTTCTGGACAAAAGTACGCTGAGGCACGAAAGCGTG  
GGTAG

>ASV:4896:Family:Ruminococcaceae

TACGTAGGGAGCGAGCGTTGTCCGATTTACTGGGCGTAAAGGGTGCCTAGGCGGCTAGACAAGTCAGGTGTGAAATACC  
GCAGCTCAACTGCGGGGCTGCATTTAAAAGTGTAGAGCTTGAGTGTGGAGAGGTAAGCGGAATTCCTAGTGTAGCGGTG  
AAATGCGTAGATATTAGGAGGAACACCAGTGGCGAAGGCGGCTTACTGGACTTAACGACGCTGAGGCACGAAAGCGTG  
GGGAG

>ASV:4897:Genus:UBA1819

TACAGAGGTCTCAAGCGTTGTTCCGGAATCACTGGGTGTAAGGGAGCGCAGGCGGATTGGCAAGTTGGGAGTGAAATCTA  
TGGGCTCAACCATAAATTGCTTTCAAAGTGTAGTCTTGAGTGGTGTAGAGGTAGCGGGAATTCCTAGTGTAGCGGTG  
AAATGCGTAGATATTAGGAGGAACACCAGTGGCGAAGGCGGCTTACTGGACGATAACTGACGCTGAGGCTCGAAAGCGTG  
GGGAG

>ASV:4898:Genus:Holdemania

TACGTAGGTGGCGAGCGTTATCCGGAATTATTGGGCGTAAAGGGTGCAGGCGGTTTGTAAAGTTAAGGTGAAAGCGT  
GGGGCTTAACCCATATAGCCTTAGAAAGTGCAGACTAGAGTACAGGAGAGGGCAATGGAATTCATGTGTAGCGGTAA  
AATGCGTAGATATGAGGAACACCAGTGGCGAAGGCGGTTGCTGGCCTGTAACGACACTGAGGCACGAAAGCGGTG  
GGAGC

>ASV:4899:Genus:Fournierella

AACGTAGGTGGCAAGCGTTGTCCGGAATTACTGGGTGTAAGGGAGCGCAGGCGGATTGCAAGTTGGAAGTGAACCCA

TGGGCTCAACCCATGGACTGCTTTCAAACCTGCAGATCTTAGTGGTGTAGAGGTAGGCGGAATTCCTGGTGTAGCGGTG  
GAATGCGTAGATATCGGGAGGAACACCAGTGGCGAAGGCGGCTACTGGGCACCAACTGACGCTGAGGCTCGAAAGTGTG  
GGTAG

>ASV:4900:Order:Bacteroidales

TACGGAGGATCAAGCGTTATCCGGATTTATTGGGTTTAAAGGGTGCCTAGGTGGCAGTGCAAGTCAGATGTGAAAGGCC  
GGGGCTCAACCCGGAGCTGCATTTGAAACTGCATAGCTAGAGTACAGGAGAGGCAGGCGGAATTCCTAGTGTAGCGGTG  
AAATGCTTAGATATCACGAAGAACCCTCGATTGCGAAGGCAGCCTGCTAAGCTGCAACTGACATTGAGGCTCGAAAGTGTG  
GGTAT

>ASV:4901:Order:Bacteroidales

TACGTAGGTGGCGAGCGTTATCCGGATTTACTGGGTGTAAGGGGCGCTAGGCGGAGATGCAAGTCAGATGTGAAATCCT  
CGGGCTTAACCCGGGAAGTGCATTTGAAACTGTATCCCTTAGTATCGGAGAGGCAGGCGGAATTCCTAGTGTAGCGGTG  
AAATGCATAGATATCACGCAGAACCCTCGATTGCGAAGGCAGCTTACTAAACCATAACTGACACTGAAGCACGAAAGCGTG  
GGGAT

>ASV:4902:Genus:Anaerotruncus

TACGTAGGGAGCAAGCGTTGTCCGGAATTACTGGGTGTAAGGGGAGCGTAGGCGGGATGGCAAGTAGAATGTTAAATCCA  
TCGGCTCAACCCGGTGGCTGCGTTCTAAACTGCCGTTCTTAGTGAAGTAGAGGCAGGCGGAATTCCTAGTGTAGCGGTG  
AATGCGTAGATATTAGGAGGAACACCAGTGGCGAAGGCGGCTGCTGGACGACAACTGACGCTGAGGCGGAAAGCGGTG  
GGAGC

>ASV:4903:Genus:Ruminococcaceae\_UCG-013

TACGTAGGGAGCGAGCGTTGTCCGGAATTACTGGGTGTAAGGGTGCCTAGGCGGGATGGCAAGTCAGATGTGAAATACC  
GGGGCTTAACCCGGGGCTGCGATTGAAACTGACAGCCTTAGTATCGGAGAGGAAAGCGGAATTCCTAGTGTAGCGGTG  
AAATGCGTAGATATTAGGAGGAACACCAGTGGCGAAGGCGGCTACTGGGCACCAACTGACGCTGAGGCGGAAAGCGGTG  
GGTAG

>ASV:4904:Family:Lachnospiraceae

TACGTAGGGGGCAAGCGTTATCCGGATTTACTGGGTGTAAGGGGAGCGTAGACGGTTTTGCAAGTCTGAAGTGAAGGCC  
GGGGCTTAACCCGGGACTGCTTTGAAACTGTAGGACTAGAGTGCAGGAGAGGTAAGTGAATTCCTAGTGTAGCGGTG  
AAATGCTTAGATATCACGCAGAACCCCGATTGCGAAGGCAGCCTGCTAGGTTGCGACAGACGCTGAGGCGGAAAGCATG  
GGTAG

>ASV:4905:Genus:Odoribacter

TACGTAGGGAGCAAGCGTTGTCCGGAATTATTGGGTTTAAAGGGTGCCTAGGCGGTTGTGTAAGTTAGTGGTCAAATGTC  
ATGGCTCAACCTTGGCTTGCCATTAATAACTGCACGACTCGAGTACAGACGAGGTAGGCGGAATAAGTTAAGTAGCGGTG  
AATGCATAGATATAACTTAGAACTCCGATAGCGAAGGCAGCTTACCAGACTGTAAGTACGCTGATGCACGAGAGCATG  
GTAGC

>ASV:4906:Family:Ruminococcaceae

AACGTAGGGTGAAGCGTTGTCCGGAATTACTGGGTGTAAGGGGAGCGCAGGCGGACCGGCAAGTTGGAAGTGAATACTA  
TGGGCTCAACCCATAAATTGCTTTCAAACCTGCTGGCCTTAGTGTAGTGCAGAGGTAGGTGGAATTCCTGGTGTAGCGGTG  
AAATGCATAGATATCACGCAGAACCCCGATTGCGAAGGCAGCCTGCTAGGTTGCGACAGACGCTGAGGCGGAAAGCGGTG  
GGTAT

>ASV:4907:Family:Lachnospiraceae

TACGTAGGGAGCAAGCGTTATCCGGATTTACTGGGTGTAAGGGGAGCGTAGACGGTTTTGCAAGCCTGAAGTGAAGGCC  
GGGGCTTAACCCGGGACTGCTTTGAAACTGTAGGACTAGAGTGCAGGAGAGGTAAGTGAATTCCTAGTGTAGCGGTG  
AAATGCTTAGATATCACGAAGAACCCTCGATTGCGAAGGCAGCTCACTAGACTGCAACTGACACTGATGCTCGAAAGTGTG  
GGTAT

>ASV:4908:Kingdom:Bacteria

TACGTAGGGGGCGAGCGTTATCCGGATTTATTGGGCGTAAAGCGTGTAGGCGGTTTTAAGTTTAAAGTTAAAGGCC  
GGGGCTCAACTCCGGTAAGTCTTAAAACTGGTAGACTTGTAGTACGGTAGAGGCAAACGGAATTCCTAGTGTAGCGGTG  
AATGCTTAGAGATATACAGAACACCATTGCGAAGGCAGCTTACCAAATATATCTGACGTTGAGGCGGAAAGCATG  
GTAGC

>ASV:4909:Order:Bacteroidales

AACGTAGGGTGAAGCGTTGTCCGGAATTACTGGGTGTAAGGGGAGCGTAGGCGGGATGCCAAGTCAGCTGTGAAACTA  
TGGGCTTAACCTGTAGACTGCAAGTGAAGTGGTATTCTTAGTGAAGTAGAGGTGGGCGGAATTCGTGGTGTAGCGGTG  
AAATGCTTAGATATCACGAAGAACCCTCGATTGCGAAGGCAGCTCACTAGACTGCAACTGACACTGATGCTCGAAAGTGTG  
GGTAT

>ASV:4910:Genus:Prevotella\_6

TACGGAAGGTCCGGGCGTTATCCGGATTTATTGGGTTTAAAGGGGAGCGTAGGCGGTTAAGTGTGTTGTGAAATCCG  
GTTGCTCAACATCCGGTTTGCAGCGCATACTGCCACTTGTAGTGCACACGAGGCGGAATTCGTGCTGAGCGGTG  
AAATGCTTAGATATGACGAGGAACCCCGATTGCGAAGGCAGCTTCTGACTGTAAGTACGCTGATGCTCGAAAGTGTG  
GGTAT

>ASV:4911:Phylum:Firmicutes

TACGTAGGTGGCGAGCGTTGCCGGATTTACTGGGTGTAAGGGGCGTGCAGCCGGGCCGGAAGTCAGATGTGAAATCTG  
GAGGCTTAACCTCCAACCTGCATTTGAAACTGTAGGCTTGTAGTACCAGGAGAGGAAAGGGGAATTCCTAGTGTAGCGGTG  
AAATGCGTAGATATTGGGAGGAACACCAGTGGCGAAGGCGGCTTCTGACTGTGCTGACGCTGAGATGCGAAAGCCAG  
GGTAG

>ASV:4912:Family:Lachnospiraceae

TACGTAGGGGGCAAGCGTTATCCGGAATTACTGGGTGTAAGGGTGCCTAGGTGGTATGGCAAGTCAGAAGTGAATACTC  
TGGGCTTAACCCCTGGGACTGCTTTGGAAACTGTTTTGCTAGAGTGTGCGAGAGGTAAGTGAATTCCTAGTGTAGCGGTG  
AAATGCGTAGATATCGGGAGGAACACCAGTGGCGAAGGCGGCTACTGGGCACTAACTGACGCTGAGGCTCGAAAGCATG  
GGTAG

>ASV:4913:Genus:Roseburia  
TACGGAGGATGCGAGCGTTATCCGGATTTACTGGGTGTAAAGGGAGCGCAGGCGGTGCGGCAAGTCTGATGTGAAAGCCC  
GGGGCTCAACCCCGTACTGCATTGAAACTGGTCATCTAGAGTGTGCGAGGGTAAGTGAATTCTAGTGTAGCGGTG  
AAATGCGTAGATATTAGGAGGAACACCAGTGGCGAAGGCGGCTTACTGGACGATAACTGACGCTGATGCTCGAAAGTGTG  
GGTAT

>ASV:4914:Species:catenulatus/idriensis/indicus/pumilus  
TACGTAGGTGGCAAGCGTTGTCCGGAATTATTGGGCGTAAAGCGCGCAGGCGGTTTCTTAAGTCTGATGTGAAAGCCC  
CCGGCTCAACCCGGGAGGGTATTGAAACTGGGAACTTGGAGTGCAGAAGAGGAGAGTGAATTCCACGTGTAGCGGTG  
AAATGCGTAGAGATGTGGAGGAACACCAGTGGCGAAGGCGACTCTCTGGTCTGTAAGTACGCTGAGGCGCAAGCGGTG  
GGGAG

>ASV:4915:Family:Eggerthellaceae  
TACGGAGGATCCGAGCGTTATCCGGATTTATTGGGCGTAAAGCGCGCGTAGGCGGCGCCTAAGCGGAACCTCTAATCCC  
GGGGCTCAACCTCGGGCCGGTTCGGACTGGGCGGCTCAGTGCAGTACAGTAGAGGTGGGCGGAATTCGTGGTGTAGCGGTG  
AATGCTTAGATATCACGAAGAACTCCGATTGCGAAGGCGACTGCTAAGCTGCAACTGACATTGAGGCTCGAAAGTGTG  
GTATC

>ASV:4916:Genus:Bacteroides  
AACGTAGGTACAAGCGTTGTCCGGAATTACTGGGTGTAAAGGGAGCGTAGGCGGGATCTTAAGTCAGGTGTGAAAACCTA  
TGGGCTCAACCCATAGACTGCAGTTGAAACTGGCAGTCTTGGAGTACAGTAGAGGTGGGCGGAATTCGTGGTGTAGCGGTG  
AAATGCTTAGATATCACGAAGAACTCCGATTGCGAAGGCGACTACTAGACTGCTACTGACACTGATGCTCGAAAGTGTG  
GGTAT

>ASV:4917:Genus:Streptococcus  
TACGTAGGTCCGAGCGTTATCCGGATTTATTGGGCGTAAAGCGAGCGCAGGCGGTAGATAAGTCTGAAGTTAAAGGCT  
GTGGCTTAACCCATAGTACGCTTTTGGAACTGTTAACTTGGAGTGCAGAAGGGGAGAGTGAATTCCATGTGTAGCGGTG  
AATGCGTAGATATCGGGAGGAACACCAGTGGCGAAGGCGGCTACTGGGCACCAACTGACGCTGAGGCTCGAAAGTGTG  
GTAGC

>ASV:4918:Genus:Butyricicoccus  
TACGTAGGGAGCAAGCGTTATCCGGATTTACTGGGTGTAAAGGGCGCGCAGGCGGGCCGGAAGTTGGAAGCGAAATCCG  
GGGGCTTAACCCCATGACTGCTTTTCAAACCTGGTCTTGGAGTGTGGAGAGGCAAGCGGAATTCCTGTGTAGCGGTG  
AAATGCGTAGATATACGGAGGAACACCAGTGGCGAAGGCGGCTGCTGGACATTAAGTACGCTGAGGCGCAAGCGGTG  
GGGAG

>ASV:4919:Family:Ruminococcaceae  
TACGTAGGTGGCAAGCGTTGTCCGGATTTACTGGGTGTAAAGGGCGGTAGGCGGAGAAGCAAGTCAGAAGTGAATCCA  
TGGGCTTAACCCATGACTGCTTTTCAAACCTGTTGACTGGAGTGTGGAGAGGTAAGCGGAATTCCTAGTGTAGCGGTG  
AAATGCGTAGATATTAGGAGGAACACCAGTGGCGAAGGCGGATTGCTGGACAGCAACTGACGCTGAGGCGCAAGCGGTG  
GGGAG

>ASV:4920:Family:Lachnospiraceae  
TACGGAGGATCCGAGCGTTATCCGGATTTATTGGGTTAAAGGGAGCGTAGGCGGATTGGCAAGTCAGAAGTGAATCCA  
TGGGCTTAACCCATGACTGCTTTTCAAACCTGTTAGTCTTGGAGTGAAGTAGAGGCAAGCGGAATTCCTAGTGTAGCGGTG  
AAATGCGTAGATATTAGGAGGAACACCAGTGGCGAAGGCGGCTACTGGACTGTAAGTACACTGAGGCTCGAAAGCGGTG  
GGGAG

>ASV:4921:Family:Ruminococcaceae  
TACGTATGGTGCAGCGTTATCCGGATTTACTGGGTGTAAAGGGAGCGTAGACGGCGCAGCAAGTCTGATGTGAAAGGCA  
GGGGCTTAACCCATAAACTGCATTTGAAACTGTGGTCTTGGAGTGAAGTAGAGGTAAGCGGAATTCCTAGTGTAGCGGTG  
AAATGCGTAGAGATGGGAGGAACACCAGTGGCGAAGGCGGCTGCTGGGCTTTTACTGACGCTGAGGCTCGAAAGCATG  
GGTAG

>ASV:4922:Family:Lachnospiraceae  
TACGTAGGGGGCAAGCGTTATCCGGATTTACTGGGTGTAAAGGGAGCGTAGACGGGGAAGCAAGTCAGATGTGAAAACCA  
GTGGCTCAACCCACTGGCCTGCATTTGAAACTGTCTAGCTAGAGTGCAGGAGAGGTAAGCGGAATTCCTAGTGTAGCGGTG  
AAATGCGTAGATATTAGGAAGAACACCAGTGGCGAAGGCGGCTTCTGGACTGAAACTGACGCTGAGGCTCGAAAGCATG  
GGGAG

>ASV:4923:Genus:Ruminococcaceae\_UCG-010  
TACGTAGGTGGCGAGCGTTATCCGGAATTAAGGGTGTAAAGGGTGTAGGCGGGACGACAAGTCTGATGTGAAAATTG  
CAGGCTCAACCTGGAAGTGCATTTGAAACTGCCGTTCTTGGAGTGCAGGAGGTAAGTGAATTCCCTAGTGTAGCGGTG  
AAATGCGTAGATATTAGGAGGAACACCAGTGGCGAAGGCGGATTGCTGGACGACAAGTACGCTGAGGCGCAAGCGGTG  
GGGAG

>ASV:4924:Family:Lachnospiraceae  
TACGTATGGTGCAGCGTTATCCGGATTTACTGGGTGTAAAGGGAGCGTAGACGGAGAGGCAAGTCTGATGTGAAAACCC  
GGGGCTCAACCCGGGACTGCATTGAAACTGTTTTCTAGAGTGTGCGGAGAGGTGAGTGAATTCCCTAGTGTAGCGGTG  
AAATGCGTAGATATTAGGAGGAACACCAGTGGCGAAGGCGGCTTACTGGACGATGACTGACGTTGAGGCTCGAAAGCGGTG  
GGGAG

>ASV:4925:Phylum:Firmicutes  
TACGTAGGGGGCGAGCGTTGTCCGGAATTATTGGGCGTAAAGGGTGCAGTGGCGGCTGCAAGTCTGATGTGAAAACCC  
CGTGTCTAACATGGGACTGCATTTGAAACTGATGGGCTTGGAGTGTGGGAGAGGCAAGCGGAATTCCTAGTGTAGCGGTG  
AAATGCGTAGAGATCGGGAGGAACACCAGTGGCGAAGGCGGCTTCTGGACCAAGACTGACGCTGATGACGAAAGCGGTG  
GGGAG

>ASV:4926:Family:Lachnospiraceae  
TACGTAGGGTGAAGCGTTATCCGGATTTACTGGGTGTAAAGGGAGCGTAGACGGCAGGCAAGCCAGATGTGAAAGCCC  
GGGGCTCAACCCGGGACTGCATTTGAAACTGCTGAGCTAGAGTGTGCGGAGAGGCAAGTGAATTCCCTAGTGTAGCGGTG

AAATGCATAGATATCACGCAGAACTCCGATTGCGAAGGCAGCTTACTAAACCATAACTGACACTGAAGCACGAAAGCGTG  
GGAT  
>ASV:4927:Family:Lachnospiraceae  
AACGTAGGTACAAGCGTTATCCGGATTTACTGGGTGTAAGGGAGCGCAGGCGGTACGGCAAGTCTGATGTGAAATCCC  
GGGGCTCAACCCGGTACTGCATTGAAAAGTGGTATCTAGAGTGTCCGAGGGTAAGTGAATTCTAGTGTAGCGGTG  
AAATGCGTAGATATTGGGAGGAACACCAAGTGGCGAAGGCAGCTAACTGGACTGTAAGTACGCTGAGGCGCGAAAGTGTG  
GGAG  
>ASV:4928:Family:Lachnospiraceae  
TACGTATGGTCAAGCGTTATCCGGATTTACTGGGTGTAAGGGAGCGTAGACGGATAAGCAAGTCTGGAGTAAAAGCCC  
GGGGCTCAACCCGGGACTGCTTTGAAAAGTGTAACTAGAGTGTGGAGAGGTAAGTGAATTCTAGTGTAGCGGTG  
AAATGCATAGATATCATAACAGAACACCGATTGCGAAGGCAGCTTACCAAATATATCTGACGTTGAGGCTCGAAAGTGTG  
GGTAT  
>ASV:4929:Family:Lachnospiraceae  
TACGTAGGGGGCAAGCGTTATCCGGAACTACTGGGTGTAAGGGTGCCTAGGTGGTATGGCAAGTCAAGTAAAACCC  
AGGGCTTAACCCGGGACTGCTTTGAAAAGTGTAGAACTAGAGTGCAGGAGAGGTAAGTGAATTCTAGTGTAGCGGTG  
AAATGCGTAGATATTAGGAGGAACACCAAGTGGCGAAGGCAGTCAACTGGACGATAACTGACGCTGAGGCGCGAAAGCGTG  
GGAG  
>ASV:4930:Order:Clostridiales  
TACGGAGGATCCGAGCGTTATCCGGATTTACTGGGTGTAAGGGCGTGTAGCCGGGAAGGCAAGTCAAGTGTGAAATCCA  
CGGGCTCAACTCGTGAAGTGCATTTGAAAAGTGTCTTCTGAGTATCGGAGAGGCAATCGGAATTCTAGTGTAGCGGTG  
AAATGCTTAGATATCACGAAGAACTCCGATTGCGAAGGCAGCTTCTGGACTGTAAGTACGCTGATGCTCGAAAGTGTG  
GGTAT  
>ASV:4931:Family:Clostridiales\_vadinBB60\_group  
TACGTAGGATGAAGCGTTATCCGGAACTACTGGGCGTAAAGGGTGCCTAGGTGGTTTGTCAAGTTGGCAGCGTAATTCC  
GTGGCTCAACCCGGAACTACTGCCCCAACTGATAGCTTGTAGTGCAGGAGAGGTAAGTGAATTCTAGTGTAGCGGTG  
GAATGCGTAGATATTAGGAGGAACACCGTGGCGAAGGCAGCATACTGGGCCGTAAGTACACTGAAGCACGAAAGCGTG  
GGAG  
>ASV:4932:Family:Ruminococcaceae  
TACGTAGGTGGCAGCGTTATCCGGAACTATTGGGTGTAAGGGTGCCTAGGCGGGATGTAAGTCAAGTGTGAAATGCC  
GCGGCTCAACCCGGAGCTGCATTTGAAAAGTGTGTTCTTGTAGTGAAGTAGAGATAAGCGGAATTCTAGTGTAGCGGTG  
AAATGCGTAGATATTAGGAGGAACACCGTGGCGAAGGCAGCTTACTGGGCTTAGACTGACGCTGAGGCGCGAAAGTGTG  
GGAG  
>ASV:4933:Genus:S5-A14a  
TACGTAGGGGGCAGCGTTATCCGGAACTATTGGGCGTAAAGAGTGCCTAGGTGGTTACCTAAGCGCAGGGTCTAAGGCA  
ATGGCTCAACCATTTGTCGCCCTGCGAACTGGGCTACTTGTAGTGCAGGAGAGGAAAGCGGAATTCTAGTGTAGCGGTG  
AATGCGTAGATATCGGGAGGAACACCAAGTGGCGAAGGCAGCTACTGGGCACCAACTGACGCTGAGGCTCGAAAGCATGG  
GTAGC  
>ASV:4934:Family:Ruminococcaceae  
TACGTAGGTGGCAAGCGTTGTCCGGATTTACTGGGTGTAAGGGTGCCTAGGCGGGACTGCAAGTCTGATGTGTAATCTG  
GTGGCTCAACCCAACTGCATTTGAAAAGTGTAGTTCTTGTAGTATCGGAGAGGCGAGCGGAATTCTAGTGTAGCGGTG  
AAATGCTTAGATATTAGGAGGAACACCAAGTGGCGAAGGCAGCTTACTGGACGATAACTGACGCTGAGGCTCGAAAGCGTG  
GGAG  
>ASV:4935:Family:Lachnospiraceae  
TACGGAGGATCCGAGCGTTATCCGGATTTATTGGGTTAAAGGGTGCCTAGGTGGTATGGCAAGTCAAGTAAAACCC  
AGGGCTTAACCTGGGACTGCTTTTAAAAGTGTGAGACTGGAGTGCAGGAGAGGTAAGCGGAATTCTAGTGTAGCGGTG  
AAATGCGTAGATATCGGGAGGAACACCAAGTGGCGAAGGCAGCTTACTGGGCACCAACTGACGCTGAGGCTCGAAAGTGTG  
GGTAG  
>ASV:4936:Genus:Ruminococcaceae\_UCG-010  
TACGTAGGTGGCAAGCGTTATCCGGATTTACTGGGTGTAAGGGTGTGTAGGCGGGAGGCCAAGTCAAGTGTGAAAATCA  
TGGGCTCAACTCATGACTTGCATTTGAAAAGTGGTTTTCTTGTAGTATGGGAGAGGTAAGTGAATTCCCGGTGTAGCGGTG  
AAATGCGTAGATATCGGGAGGAACACCAAGTGGCGAAGGCAGTTACTGGACCAACTGACGCTGATACGAAAGCGTG  
GGAG  
>ASV:4937:Order:Clostridiales  
TACGTAGGGGGCAGCGTTGTCCGGAACTACTGGGCGTAAAGGGCGCGTAGGCGGCATATTAAGTTAGATGTGAAATCCC  
CGGGCTTAACCTGGGTGTTGCATTTAAAAGTGTAAAGCTTGTAGTGCAGGAGAGGTAAGTGAATTCTAGTGTAGCGGTG  
AAATGCGTAGATATTAGGAGGAACACCAAGTGGCGAAGGCAGCTTACTGGACTGCTACTGACACTGAGGCGCGAAAGCGTG  
GGAG  
>ASV:4938:Family:Ruminococcaceae  
TACGTAGGGAGCAAGCGTTATCCGGATTTATTGGGTTAAAGGGAGCGCAGGCGGACCGGCAAGTTGGAAGTAAAACCTA  
TGGGCTCAACCCATAAATGCTTTCAAAGTGTGCTGGCCTTGTAGTGTGAGGAGGTAAGTGAATTCCCGGTGTAGCGGTG  
GAATGCGTAGATATCGGGAGGAACCTCGATTGCGAAGGCAGCTCACTAGACTGTTACTGACACTGAGGCGCGAAAGCGTG  
GGAG  
>ASV:4939:Order:Bacteroidales  
AACGTAGGTACAAGCGTTGTCCGGAACTACTGGGTGTAAGGGAGCGCAGGCGGGAAGACAAGTTGGAAGTAAAATCTA  
TGGGCTCAACCCATAAAGTGTCTTTCAAAGTGTGCTGGCCTTGTAGTGTGTTTGTAGGAGGCGGAATGCGTGGTGTAGCGGTG  
AAATGCATAGATATCACGCAGAACTCAATTGCGAAGGCAGCTTACTAAACCATAACTGACACTGGAGCACGAAAGCGTG  
GGTAT  
>ASV:4940:Genus:Angelakisella

AACGTAGGTCACAAGCGTTGTCCGGAATTATTGGGTGTAAAGGGAGCGTAGGCGGGAAGGCAAGTTGGATGTGAAAAGCTG  
TGGGCTCAACCTACAGACTGCATTCAAAGCTGTTTTCTTGGAGTGAAGTAGAGGCAAGCGGAATTCCTAGTGTAGCGGTG  
AAATGCGTAGATATTAGGAGGAACACCAGTGGCGAAGGCGGCTTCTGACTGTAACGACTGAGGCTCGAAAGCGTG  
GGGAG  
>ASV:4941:Order:Bacteroidales  
TACGTAGGGAGCGAGCGTTGTCCGGAATTACTGGGTGTAAAGGGAGCGTAGGCGGGAGTCAAGTCAGTTGTGAAAAGCC  
ACGGCCCAACCGTGGTCTGTCAGTTGAAACTGGTTCTTCTTGGAGTGGCGACGAGGACGGTGAATTCGTGGTGTAGCGGTG  
AAATGCTTAGATATCACGAAGAAGCTCCGATTGCGAAGGCAGCTCACTAGACTGTTACTGACTGATGCTCGAAAGTGTG  
GGTAT  
>ASV:4942:Family:Lachnospiraceae  
TACGTAGGGAGCGAGCGTTATCCGGATTTACTGGGTGTAAAGGGAGCGTAGACGGAGTGGAAGTCTGATGTGAAAACCC  
GGGGCTCAACCCGGGACTGCATTGAAACTGTCAATCTGGAGTACCGGAGAGGTAAGCGGAATTCCTAGTGTAGCGGTG  
AAATGCGTAGATATTAGGAGGAACACCAGTGGCGAAGGCGGCTCTCTGACTGTAACGACTGAGGCACGAAAGCGTG  
GGGAG  
>ASV:4943:Genus:Christensenellaceae\_R-7\_group  
TACGTAGGGGGCAAGCGTTGTCCGGAATGACTGGGCGTAAAGGGCGCGTAGGCGGCTTTTTAAGTTAGAAGTGGAAGTCC  
TGCTTTAAGGTGGGAATTGCTTTTAATACTGGAAGGCTTGGAGTGCAGAAAGAGTAAGTGAATTCAGTGTAGCGGTG  
AAATGCGTAGAGATTGGGAAGAACACCAGTGGCGAAGGCGACTTACTGGGCTGTAACGACTGAGGCGGAAAGCGTG  
GGGAG  
>ASV:4944:Genus:Bacteroides  
TACGGAGGATCCGAGCGTTATCCGGATTTATTGGGTTAAAGGGAGCGTAGGCGGACGCTTAAGTCAGTTGTGAAAAGTTT  
GCGGCTCAACCGTAAATTCAGTTGATACTGGGTGTCTTGGAGTACAGTAGAGGCAGGCGGAATTCGTTGTGACGCGGTG  
ACATGCTTAGATATAACGAGGAAGCTCCGATTGCGTAGGCAGCTTACTAAGCCATAACTGACGCTCAAGCACGAAAGCGTG  
GGGAT  
>ASV:4945:Family:Muribaculaceae  
TACGGAGGATGCGAGCGTTATCCGGATTTATTGGGTTAAAGGGTGCCTAGGCGGCTGCCAAGTCAGCGGTAAAATTGC  
GGGGCTCAACTCCGTAAGCCGTTGAAACTGGCGCGCTCGAGTGGGCGAGAAGTATGCGGAATGCGTGGTGTAGCGGTGA  
AATGCATAGATATCACGAGAACCCCGATTGCGAAGGCAGCATACCGGCGCCCACTGGCGCTGAGGCACGAAAGTGGCG  
GGATC  
>ASV:4946:Species:coli  
TACGGAGGGTGCAAGCGTTAATCGGAATTACTGGGCGTAAAGCGCACGAGGCGGTTTGTAAAGTCAGATGTGAAATCCC  
CGGGCTCAACCTGGGAACCGCATGTGACTGCTTGGAGTACCGGAGAGGTAAGCGGAATTCAGTGTAGCGGTG  
AAATGCGTAGAGATCTGGAGGAATACCGGTGGCGAAAGCGGCCCTTGGACGAAGACTGACGCTCAGGTGCGAAAGCGTG  
GGGAG  
>ASV:4947:Genus:Parasutterella  
AACGTAGGTCACAAGCGTTGTCCGGAATTACTGGGTGTAAAGGGAGCGCAGGCGGGAGAACAAAGTTGGAAGTGAATCCC  
CGGGCTTAACCTGGGAACCGCATATGTGACTGCTTGGCTTGGAGTGGCGCAGAGGGAGTGAATTCACGCTGTAGCAGTG  
AAATGCGTAGATATGTGGAAGAACACCAGTGGCGAAGGCAACCTCTGGGACGCAACTGACGCTCATACGAAAGCGTG  
GGGAG  
>ASV:4948:Family:Lachnospiraceae  
TACGTAGGGGGCAAGCGTTATCCGGATTTACTGGGTGTAAAGGGAGCGTAGACGGCAAGGCAAGTCTGATGTGAAAACCC  
AGGGCTTAACCTGGGACTGCATTGAAACTGTCAATCTGGAGTACCGGAGAGGTAAGCGGAATTCCTAGTGTAGCGGTG  
AAATGCGTAGATATTAGGAAGAAGCTCCGATTGCGAAGGCAGCTCACTAGACTGCAACTGACTGATGCTCGAAAGTGTG  
GGTAT  
>ASV:4949:Family:Peptococcaceae  
TACGTAGGGAGCGAGCGTTGTCCGGAATTACTGGGCGTAAAGGGCGCGTAGGCGGAACTTAAGTTAGGTGTGAAAAGTT  
TGGGCTCAACCCAAAGACTGCATTGAAACTGGGTTTCTTGGAGGCGAGAGAGGAAAGTGAATTCCTAGTGTAGCGGTG  
AAATGCGTAGATATTAGGAGGAACACCAGTGGCGAAGGCGACTTCTGGACTGTACCTGACGCTGAGGCGGAAAGCATG  
GGGAG  
>ASV:4950:Family:Ruminococcaceae  
TACGTAGGGAGCGAGCGTTGTCCGGATTTACTGGGTGTAAAGGGTGCCTAGGCGGCTAGACAAGTCAGGTGTGAAATACC  
GCAGCTCAACTGCGGGGCTGCACTTGAAGCTGTAGAGCTTGGAGTGGAGAGGTAAGCGGAATTCCTAGTGTAGCGGTG  
AAATGCGTAGATATCGGAGGAACACCAGTGGCGAAGGCGGCTACTGGGCACCAACTGACGCTGAGGCTCGAAAGTGTG  
GGTAG  
>ASV:4951:Genus:Christensenellaceae\_R-7\_group  
TACGTAGGGGGCAAGCGTTGTCCGGAATGACTGGGCGTAAAGGGCGGTAGGCGGCGGATTAAGTGTGGAGTGAAGTCC  
ACTTTTCAAGGGTGAATTGCTTTGCAAGACTGGTTGGCTTGGAGTGGCGAAGAGGTAAGCGGAATTCAGTGTAGCGGTG  
AAATGCGTAGAGATTGGGAGGAACACCAGTGGCGAAGGCGACTTACTGGGCCGTAACGACTGAGGCGGAAAGCGTG  
GGGAG  
>ASV:4952:Family:Lachnospiraceae  
TACGTAGGGGGCAAGCGTTATCCGGATTTACTGGGTGTAAAGGGAGCGTAGACGGCGAAGCAAGTCTGAAGTGAAGGCC  
GGGGCTCAACCCGGGACTGCATTGAAACTGTATGGCTGGAGCGCGGAGAGGTAAGCGGAATTCCTAGTGTAGCGGTG  
AAATGCGTAGATATTACGAGAAGCTCCGATTGCGAAGGCAGCATACCGGCGCCCAACTGACGCTCAGGCACGAAAGCGTG  
GGTAT  
>ASV:4953:Family:Lachnospiraceae  
TACGTAGGGGGCAAGCGTTATCCGGATTTACTGGGTGTAAAGGTGCGTAGGTGGCAGTGCAAGTCAGATGTGAAAGGCTG  
GGGCTCAACCCGGGACTGCATTGAAACTGTATGGCTGGAGCGCGGAGAGGTAAGCGGAATTCCTAGTGTAGCGGTGA  
AATGCTTAGATATCACGAAGAAGCTCCGATTGCGAAGGCAGCTTCTGACTGTAACGACTGATGCTCGAAAGTGTG

GTATC

>ASV:4954:Genus:Family\_XIII\_AD3011\_group

TACGTAGGGGGCAAGCGTTATCCGGAATTATTGGGCGTAAAGAGTACGTAGGTGGTTACCTAAGCAAGGGGTTAAAGGCA  
ATGGCTTAACTCTTGTTCGCCCTTGAACCTGGGCTACTTGTAGTGCAGGAGAGGAAAGCGGAATTCCTAGTGTAGCGGTGA  
AATGCGTAGATATTAGGAGGAACACCGGTGGCGAAGGCGACTATCTGGACAGAACTGACGTTGAGGCACGAAAGCGTGG  
GGAGC

>ASV:4955:Genus:Anaerofilum

TACGTAGGGAGCAAGCGTTATCCGGAATTATTGGGTGTAAGGGTGCCTAGACGGGAAGGTAAGTTAGTTGTGAAATCCC  
TCGGCTCAACTGAGGAACTGCGACTAAAACCTGCTTTTCTTGTAGTGTAGTGCAGAGGTAGGCGGAATTCCTAGTGTAGCGGTG  
GAATGCGTAGATATCGGGAGGAACACCAGTGGCGAAGGCGGCTACTGGGCACCAACTGACGCTGAGGCTCAAAAGTGTG  
GGTAG

>ASV:4956:Family:Ruminococcaceae

TACGTAGGGAGCGAGCGTTGTCCGGAATTACTGGGTGTAAGGGCGTGCAGCCGGGAATGCAAGTCAGATGTGAAATCCA  
TGGGCTTAAACCATGAACCTGCACTTGAACCTGCAGGCTTGTAGTGAAGTAGAGGTTGGCGGAATTCCTAGTGTAGCGGTG  
GAATGCGTAGATATCGGGAGGAACACCAGTGGCGAAGGCGGCTACTGGGCACCAACTGACGCTGAGGCTCGAAAGTGTG  
GGTAG

>ASV:4957:Class:Bacteroidia

AACGTAGGGTGCAGCGTTGTCCGGAATTACTGGGTGTAAGGGTGCCTAGACGGGAAATTAAGTTAGATGTGAAACCCC  
CGGGCTTAACTTGGGGACTGCATCTAATACTGGTTGACTTAGAGTACAGGAGAGGGAAGCGGAATTCCTAGTGTAGCGGT  
GAAATGCATAGATATCACGCAGAACTCCGATTGCGAAGGCGAGCTTACTAAACATAACTGACACTGAAGCACGAAAGCGT  
GGGGA

>ASV:4958:Family:Ruminococcaceae

TACGTAGGTGGCAAGCGTTGTCCGGAATTACTGGGTGTAAGGGCGCTAGGCGGGGAGACAAGTCAGATGTGAAATCTA  
TGGGCTTAAACCATAAACTGCATTTGAAACTATTTCTCTTGTAGTGTAGGAGAGGCAAGCGGAATTCCTAGTGTAGCGGTG  
AAATGCGTAGATATTAGGAAGAACACCAGTGGCGAAGGCGGATTACTGGACGACAACGACGCTGAGGCGCGAAAGCGTG  
GGGAG

>ASV:4959:Family:Ruminococcaceae

TGCGTAGGGAGCGAGCGTTATCCGGAATTATTGGGTGTAAGGGTGCCTAGGCGGGGAGTAAGTCAGATGTGAAATACC  
GGGGCTCAACCCCGGGCTGCATTTGAAACTGCATCTCTTGTAGTGTGGAGAGGAAAGCGGAATTCCTAGTGTAGCGGTG  
GAATGCGTAGATATCGGGAGGAACACCAGTGGCGAAGGCGACTACTGGGCACCAACTGACGCTGAGGCTCGAAAGCATG  
GGTAG

>ASV:4960:Family:Ruminococcaceae

TACGTAGGGAGCGAGCGTTGTCCGGAATTACTGGGTGTAAGGGTGCCTAGGCGGGCAGTCAAGTCAGACGTGAAATCTA  
TGGGCTTAAACCATAGTCTGCGTTTGAACCTGAATGTCTTGTAGTGAAGTAGAGGTAAGCGGAATTCCTAGTGTAGCGGTG  
AAATGCGTAGATATCGGGAGGAACACCAGTGGCGAAGGCGGCTACTGGGCACCAACTGACGCTGAGGCTCGAAAGCATG  
GGTAG

>ASV:4961:Genus:Raoultibacter

TACGTAGGGAGCAAGCGTTATCCGGAATTATTGGGCGTAAAGCGCGCTAGGCGGCCTGTTAAGCGGAATCTCTAATCTG  
AGGGCTCAACCCCGAGCGGATTCCGAACTGGCAGGCTCGAGTTTGGTAGAGGAAGATGGAATTCACAGTGTAGCGGTGA  
AATGCGCAGATATTGGGAAGAACACCAATGGCGAAGGCGAGTCTCTGGGCCGTTACTGACGCTGAGGAGCGAAAGCGTGG  
GGAGC

>ASV:4962:Kingdom:Bacteria

TACGGAGGATGCAAGCGTTATCCGGAATTACTGGGTGTAAGGGAGCGTAGGCGGCATGGCAAGTCAGAAGTAAAAGCCC  
GGGGCTCAACCCCGGAATTGCTTTTGAACCTGTCAGGCTAGAGTGTGAGAGGAGGTAAGTGAATTCACAGTGTAGCAGTGAA  
ATGCGTAGATATGTGGAAGAACACCGATGGCGAAGGCGAGCTCTGGGACATAACTGACGCTCAGGCACGAAAGCGTGGG  
GAGCA

>ASV:4963:Order:Clostridiales

TACGGAGGATCCGAGCGTTATCCGGAATTACTGGGTGTAAGGGTGCCTAGGTCAGTGCAGTGCAGATGTGAAAGGCC  
GGGGCTCAACCCCGGAGCTGCATTTGAAACTGCATAGCTGGAGTACAGGAGAGGCGAGCGGAATTCCTAGTGTAGCGGTG  
GAATGCGTAGATATCGGGAGGAACACCAGTGGCGAAGGCGGCTACTGGGCACCAACTGACGCTGAGGCTCGAAAGTGTG  
GGTAG

>ASV:4964:Family:Lachnospiraceae

TACGTAGGGGGCAAGCGTTATCCGGAATTACTGGGTGTAAGGGAGCGTAGACGGTTTTGCAAGTCTGAAGTAAAAGCCC  
GGGGCTCAACCCCGGACTGCTTTGAAACTGTAGAGCTAGAGTGTGGAGAGGCAAGCGGAATTCCTAGTGTAGCGGTG  
AAATGCGTAGATATTAGGAAGAACACCAGTGGCGAAGGCGAGCTCTGGGACATAACTGACGCTCAGGCACGAAAGCGTG  
GGGAG

>ASV:4965:Genus:Christensenella

TACGTAGGGAGCAAGCGTTGTCCGGAATTACTGGGCGTAAAGGGTGCCTAGGTGGTCATGTAAGTCAGATGTGAAAGACC  
GGGGCTTAAACCCGGGTTGCACTTGAACCTGTGTACTTGTAGTACAGGAGAGGGAAGTGAATTCCTAGTGTAGCGGTG  
AAATGCGTAGATATTAGGAGGAACACCAGTGGCGAAGGCGGCTACTGGACTGTAAGTACGCTTGTAGGCTCGAAAGTGTG  
GGTAT

>ASV:4966:Family:Xanthomonadaceae

TACGAAGGGTGAAGCGTTACTCGGAATTACTGGGCGTAAAGCGTGCCTAGGTGGTCGTTAAGTCTGTTGTGAAAGCCC  
TGGGCTCAACCTGGGAACTGCAGTGGAAACTGGACGACTAGAGTGTGGTAGAGGGTAGCGGAATTCCTGGTGTAGCAGTG  
AAATGCTTAGATATCACGAAGAACCTCCGATTGCGAAGGCGAGCTTACTAACCTGTAAGTACGATTGATGCTCGAAAGTGTG  
GGTAT

>ASV:4967:Family:Enterobacteriaceae

AACGTAGGTCAAGCGTTGTCCGGAATTACTGGGTGTAAGGGAGCGCAGGCGGGAAGGCAAGTTGAAAGTGAATCTA

TGGGCTCAACCATAAATTGCTTTCAAACCTGCTGGCCTTGTAGTAGTGCAGAGGTAGGTGGAATTCAGGTGTAGCGGTG  
AAATGCGTAGAGATCTGGAGGAATACCGGTGGCGAAGGCGGCCCTGGACGAAGACTGACGCTCAGGTGCGAAAGCGTG  
GGGAG

>ASV:4968:Genus:Mycoplasma

TACATAGGTCGCAAGCATTATTCGGATTTATTGGGCGTAAAGCAAGCGCAGGCGGATGTGTAAGTTCTGTGTTAAAAGTA  
GCTACTTAATAGTTGTTTGCACCGAATACTACATGTCTAGAATGTGGTAGGAAGTTTTGGAATTAACATGGAGCGGTGG  
AATGTGTAGATATGTTTAAAGAACACCGGAGGCGAAGGCGAAAACCTTAGGCCATAATTGACGCTTAGACTTAAAAGTGTGG  
GGAGC

>ASV:4969:Genus:Alistipes

TACGGAGGATTCAAGCGTTATCCGGATTTATTGGGTTTAAAGGGTGCCTAGGCGGTTTGATAAGTTAGAGGTGAAATACC  
GGTGCTTAACACCGGAAGTGCCTCTAATACTGTTGAACTAGAGAGTAGTTGCGGTACGCGGAATGCGCAGTGTAGCGGTG  
AAATGCTTAGATATTGCGCAGAAGTCCGATTGCGAAGGCAGCGTACTGGCGCTGACTGACGCTGAGGCACGAAAGCGTG  
GGGAT

>ASV:4970:Genus:Ruminiclostridium\_5

TACGTAGGGAGCGAGCGTTGTCGGATTTACTGGGTGTAAGGGTGCCTAGGTTGGCGAGGCAAGTCAGGCGTAAAATCTA  
TGGGCTTAACCCATAAACTGCGCTTGAACCTGCTTCTGCTTGTAGTGAAGTAGAGGTAGGCGGAATTCCTGGTGTAGCGGTG  
AAATGCTTAGATATCACGAAGAAGTCCGATTGCGAAGGCAGCTTACTGGATTGTAACGACGCTGATGCTCGAAAGTGTG  
GGTAT

>ASV:4971:Family:Ruminococcaceae

TACGTAGGTGCAAGCGTTGTCGGGAATTACTGGGTGTAAGGGGAGCGTAGGCGGGAGTGCAAGTTGAATGTGAAAACGA  
TGGGCTCAACCCATCGTTGCGTTCAAACCTGCATTTCTTGTAGTGAAGTAGAGGTAAGCGGAATTCCTAGTGTAGCGGTGA  
AATGCGTAAATATTAGGAGGAACACAGTGGCGAAGGCGGCTACTGGGCACCAACTGACGCTGAGGCTCGAAAGTGTGG  
GTAGC

>ASV:4972:Genus:Ruminococcaceae\_UCG-003

AACGTAGGTCAACAGCGTTGTCGGGAATTACTGGGTGTAAGGGGCGTGCAGCCGGGTGCGCAAGTCAGATGTGAAATCTC  
AGGGCTCAACCCGAACTGTATTTGAAACTGTGCATCTTGTAGTGCAGGAGGTAATCGGAATTCCTGTGTAGCGGTG  
AAATGCGTAGATATCACGAAGAAGTCCGATTGCGAAGGCAGCTGCTAAGCTGCAACTGACATTGAGGCTCGAAAGTGTG  
GATAT

>ASV:4973:Family:Lachnospiraceae

TACGTAGGTGCGAGCGTTGTCGGGAATTATTGGGCGTAAAGAGCATGTAGGCGGCTTAATAAGTCGAGCGTAAAATGC  
GGGGCTCAACCCCGTACTGCATTGAAACTGTCCGACTAGAGTGTCCGAGGGGTAAGTGAATTCCTAGTGTAGCGGTG  
AAATGCGTAGATATTAGGAGGAACACAGTGGCGAAGGCGGCTTACTGGACGATTACTGACGCTGAGGCTCGAAAGCGTG  
GGGAG

>ASV:4974:Genus:Bacteroides

TACGGAGGATGCGAGCGTTATCCGGATTTATTGGGTTTAAAGGGGAGCGCAGACGGGGCTTAAAGCCAGCTGTGAAATTTT  
CCGGCTCAACCCGGAACTGCAGTTGATACTGGCGACCTTGTAGTGAACAGAGGTAGGCGGAATTCGTGGTGTAGCGGTG  
AAATGCTTAGATATCACGAAGAAGTCCGATTGCGAAGGCAGCTGCTAAGCTGCAACTGACATTGAGGCTCGAAAGTGTG  
GGTAT

>ASV:4975:Order:Rhodospirillales

AACGTAGGTCAACAGCGTTGTCGGGAATTACTGGGCGTAAAGGGAGTGTAGGCGGTTATGTAAGATAGTGGTAAAATCCC  
AGAGCTTAACTTTGGAATTGCCATTATGACTATGTGGCTAGAATTACAGAGAGGATAGTGAATACCCAGTGTAGAGGTG  
AAATTCGTAGATATTGGGTAGAACCACAGTGGCGAAGGCGACTTACTGGACGGTAACTGACGTTGAGGCTCGAAAGCGTG  
GGGAG

>ASV:4976:Family:Muribaculaceae

TACGGAGGATCCGAGCGTTATCCGGATTTATTGGGTTTAAAGGGTGCAGGCGGAGGTGCAAGTCAGCGGTCAAATTCG  
GGGGCTCAACCCGACTGCCGTTGAAACTGCATCCCTTGTAGTGCAGGAGAGTATGCGGAATGCGTGGTGTAGCGGTGA  
AATGCATAGATATCACGAAGAAGTCCGATTGCGAAGGCAGCTCACTGGACTGCGACTGACGCTGAGGCACGAAAGCGTGG  
GGATC

>ASV:4977:Genus:Odoribacter

TACGGAGGATGCGAGCGTTATCCGGATTTATTGGGTTTAAAGGGTGCCTAGGCGGTTTATTAAGTTAGTGGTTAAATATT  
TGAGCTAAACTCAATTGTGCCATTAATACTGGTAACTGGAGTACAGACGAGGTAGGCGGAATAAGTTAAGTAGCGGTGA  
AATGCATAGATATTAGGAGGAACACAGTGGCGAAGGCGAGATTGCTGGACGCAACTGACGGTGAGGCGGAAAGCGTGG  
GGAGC

>ASV:4978:Family:Ruminococcaceae

TACGTAGGTGCTAGCGTTGTCGGGAATTACTGGGTGTAAGGGGCGTGTAGGCGGGACTTTAAGTCAGATGTGAAATACC  
CGGGCTTAACTCGGGAGGTGCATTTGAAACTGAGGTTCTTGTAGTGCAGGAGAGGAAAGCGGAATTCCTAGTGTAGCGGTG  
AAATGCGTAGATATTAGGAGGAACACAGTGGCGAAGGCGGATTGCTGGACGCAACTGACGGTGAGGCGGAAAGCGGTG  
GGGAG

>ASV:4979:Genus:Alistipes

TACGTAGGGGGCAAGCGTTATCCGGATTTATTGGGTTTAAAGGGTGCCTAGGCGGTTTGATAAGTTAGAGGTGAAATTTT  
GGGGCTCAACCTGAACGTGCCTCTAATACTGTTGAGCTAGAGAGTAGTTGCGGTAGGCGGAATGTATGGTGTAGCGGTG  
AAATGCGTAGATATCGAGAGGAACACTCGTGGCGAAGGCGGTTCTTGGACATTAACCTGACGCTGAGGCACGAAAGCCAG  
GGGAG

>ASV:4980:Family:Lachnospiraceae

TACGGAGGATCCGAGCGTTATCCGGATTTACTGGGTGTAAGGGGAGCGTAGACGGTGTGGCAAGTCTGATGTGAAAGGCA  
TGGGCTCAACCTGTGGACTGATTGAAACTGTCATACTTGTAGTGCAGGAGGGTAAGCGGAATTCGTGGTGTAGCGGTG  
AAATGCTTAGAGATCATACAGAACCAGATTGCGAAGGCAGCTTACCAACTATATCTGACGTTGAGGCACGAAAGCGTG  
GGGAG

>ASV:4981:Genus:Holdemania  
TACGTAGGTGGCGAGCGTTATCCTGAATTATTGGGCGTAAAGGGTGCAGGCGGTTTTTAAAGTTAAGGTGAAAGCGT  
GGGCTTAACCCATATAGCCTTAGAACTGAGAGACTAGAGTACAGGAGAGGGCAATGGAATTCATGTGTAGCGGTAA  
AATGCGTAGATATATGGAGGAACACCAAGTGGCGAAGGCGGTTGCCTGGCCTGTAACCTGACGCTCATGCACGAAAGCGTGG  
GGAGC

>ASV:4982:Family:Ruminococcaceae  
TACGGAAGGTCCGGGCGTTATCCGGATTTATTGGGTTAAAGGGAGCGTAGGCGGGATAGCAAGTCAGCTGTGAAAACCTA  
TGGGCTCAACCCATAAACTGCAGTTGAAACTGTTATCTTGGAGTACAGGCAAGCGGAATTCAGTGTAGCGGTG  
AAATGCGTAGATATTAGGAGGAACACCAAGTGGCGAAGGCGGCTTCTGGACTGTAACCTGACACTGAGGTACGAAAGCGTG  
GGAG

>ASV:4983:Kingdom:Bacteria  
TACGTAGGTGCAAGCGTTAATCGGAATTACTGGGTGTAAGGGCGTGCAGCCGGTCTGCAAGTCAGATGTGAAATCCA  
TGGGCTCAACCCATGAATGTCATTGAAACTGTAGATCTTGGAGTGCAGGAGGCAATCGGAATTCCTAGTGTAGCGGTG  
AAATGCGTAGATATTTGGAAGAACACCGATGGCGAAGGCGCCCTCTGGACATGACTGACGCTCATGCACGAAAGCGTG  
GGAG

>ASV:4984:Genus:Veillonella  
TACGTAGGTGGCAAGCGTTGTCGGAAATTATTGGGCGTAAAGCGCGCAGGCGGATTGGTCAGTCTGTCTTAAAAGTTT  
GGGCTTAACCCCGTAGTGGGATGAAACTGCAATCTAGAGTATCGGAGAGGAAAGTGAATTCCTAGTGTAGCGGTGA  
AATGCGTAGATATTAGGAGGAACACCGAGGCGAAAGCGACTTACTGGGCACAACCTGACGCTGAGGCGACGAAAGCGTG  
GGAGC

>ASV:4985:Genus:Odobacter  
TACGGAGGATCCGAGCGTTATCCGGATTTATTGGGTTAAAGGGTGCAGGCGGTTTAAAGTTAGTGGTTAAATATT  
TGAGCTAAACCTCAATTTGTCATTAACTACTGTTAACTGGAGTACAGACGAGGTAGGCGGAATTAAGTTAAGTAGCGGTGA  
AATGCATAGATATCGGAGGAACACCAAGTGGCGAAGGCGCCTACTGGGCACCAACTGACGCTGAGGCTCGAAAGTGTGG  
GTAGC

>ASV:4986:Genus:Asaccharospora  
TACGTAGGGGGCAAGCGTTATCCGGATTTACTGGGCGTAAAGGGTGCAGGCGGCTTTTAAAGTCAGGAGTAAAAGGCT  
ACGGCTCAACCCGATGTAAGCTTGAACCTGGAGGACTTGGAGTGCAGGAGAGAGAGTGAATTCCTAGTGTAGCGGTGA  
AATGCATAGATATAACGAAGAATCCAATTGCGCAGGCGCTTACTAACTACAACCTGACGCTGAAGCAGGAAAGCGTGG  
GTATC

>ASV:4987:Genus:Erysipelatoclostridium  
TACGTAGGTGGCAAGCGTTATCCGGAAATTATTGGGCGTAAAGAGGGAGCAGGCGGAGCAAGGGTCTGTGGTAAAAGCT  
GAAGCTTAACCTCAGTAAGCCATAGAAACAGGCGCTAGAGTGCAGGAGAGGATCGTGAATTCATGCGTAGCGGTGA  
AATGCGTAGATATTAGGAGGAACACCAAGTGGCGAAGGCGGCTTCTGGACGATGACTGACGTTGAGGCTCGAAAGCGTG  
GGAGC

>ASV:4988:Family:Erysipelotrichaceae  
AACGTAGGTCACAAGCGTTGTCCGGAAATTACTGGGTGTAAGGGTGCAGGCGGGAGAGCAAGTTGGAAGTAAAAGGCA  
ATGGCTCAACCATTTGAAGCTATGAAACTGGTAGGCTAGAGTGCAGAGAGGGCGATGGAATTCATGTGTAGCGGTAA  
AATGCGTAGATATATGGAGGAACACCAAGTGGCGAAGGCGCCTACTGGGCACCAACTGACGCTGAGGCTCGAAAGTGTGG  
GTAGC

>ASV:4989:Family:Ruminococcaceae  
AACGTAGGTCACAAGCGTTGTCCGGAAATTACTGGGTGTAAGGGAGCGCAGGCGGGAGAGCAAGTTGGAAGTAAAATCCA  
TGGGCTCAACCCATGAAGTGTCTTCAAACCTGTTTTCTTGGAGTGCAGAGGTAGGCGGAATTCAGGCTGTAGCGGTG  
GAATGCGTAGATATCAGGAAGAATCCGATTGCGAAGGCGCTCACTAGACTGTTACTGACACTGGTCTCGAAAGTGTG  
GGTAT

>ASV:4990:Genus:Phascolarctobacterium  
TACGTAGGTGGCGAGCGTTGTCCGGAAATTATTGGGCGTAAAGAGCATGTAGGCGGCTTAAATAGTCAGGCGTAAAATGC  
GGGCTCAACCCGATGCGCTGAAACTGTTAGGCTTGGAGTGCAGGAGAGGAAAGGGGAATTCAGTGTAGCGGTGA  
AATGCGTAGATATTGGAGGAACACCAAGTGGCGAAGGCGCCTTCTAGACTGTGTCTGACGCTGAGATGCGAAAGCCAGG  
GTAGC

>ASV:4991:Family:Ruminococcaceae  
AACGTAGGTCACAAGCGTTGTCCGGAAATTACTGGGTGTAAGGTGAGCGCAGGCGGGAAGACAAGTTGGAAGTAAAATCTA  
TGGGCTCAACCCATAAACTGCTTTCAAACCTGTTTTCTTGGAGTGCAGAGGTAGGCGGAATTCAGGCTGTAGCGGTG  
GAATGCTTAGAGATCATAACGAACACCGATTGCGAAGGCGCTTACCAAACTATATCTGACGTTGAGGCGAAAGCGTG  
GGGAG

>ASV:4992:Genus:Fusobacterium  
TACGTATGTACAAGCGTTATCCGGATTTATTGGGCGTAAAGCGCGTCTAGGTGGTTATGTAAGTCTGATGTGAAAATGC  
AGGGCTCAACTCTGTATTGCGTTGAAACTGCATGACTAGAGTACTGGAGAGGTAAGCGGAACCACAAGTGTAGAGGTGA  
AATTCGTAGATATTTGTAGGAATGCCGATGGGGAAGGCGCTTACTGGACAGATACTGACGCTAAAGCGCGAAAGCGTG  
GGTAT

>ASV:4993:Genus:DTU089  
TACGTAGGGAGCGAGCGTTGTCCGGATTTACTGGGTGTAAGGGTGGGTAGGCGGATCTGCAAGTCAGTAGTAAAATCCC  
AGGGCTTAACCTGAACTGCTATTGAAACTGTGGTCTTGGAGTGGAGGCGAGGCGGAATTCAGGCTGTAGCGGTG  
AAATGCTTAGATATCAGGAAGAATCCGATTGCGAAGGCGCTCACTAGACTGTCTGACACTGATGCTCGAAAGTGTG  
GGTAT

>ASV:4994:Genus:Bacteroides  
TACGGAGGATCCGAGCGTTATCCGGATTTATTGGGTTAAAGGGAGCGTAGGTGGGTTGTTAAGTCAGTTGTGAAAATTT  
CGGGCTCAACCGTAAAATTGCAGTTGAAACTGGCAGTCTTGGAGTACAGTAGAGGTGGGCGGAATTCGTGGTGTAGCGGTG



AAATGCTTAGATATCACGAAGAACTCCGATTGCGAAGGCGGTCTACTGGCACCAACTGACGCTGAGGCTCGAAAGCATG  
GGTAG  
>ASV:4995:Genus:Lactococcus  
TACGTAGGTCCCGAGCGTTGTCCGGATTTATTGGGCGTAAAGCGAGCGCAGGTGGTTTATTAAGTCTGGTGTAAAAGGCA  
GTGGCTCAACCATTGTATGCATTGGAACTGGTAGACTTGAGTGCAGGAGAGAGAGTGAATTCCATGTGTAGCGGTGA  
AATGCTTAGATATCACGAAGAACTCCGATTGCGAAGGCGAGCTCACTAGACTGTCACTGACACTGATGCACGAAAGTGTG  
GTATC  
>ASV:4996:Genus:UBA1819  
AACGTAGGGTGCAAGCGTTATCCGGAATTACTGGGTGTAAGGGAGCGCAGGCGGATTGGCAAGTTGGGAGTGAAATCTA  
TGGGCTCAACCATAAATTGCTTTCAAACCTGTCAGTCTTGAGTACAGTAGAGGTGGGCGGAATTCGTGGTGTAGCGGTG  
AAATGCTTAGATATCACGAAGAACTCCGATTGCGAAGGCGAGCTCACTGGACTGCAACTGACACTGATGCTCGAAAGTGTG  
GGTAT  
>ASV:4997:Genus:Lactonifactor  
TACGTAGGTCCCAAGCGTTGTCCGGATTTATTGGGCGTAAAGCGAGCGCAGGCGGTTTGATAAGTCTGAAGTTAAAGGCT  
GTGGCTCAACCTGTGGACTGCTTTGAAACTGTGCAGCTAGAGTGTGGAGAGGTAAGTGAATTCCTAGTGTAGCGGTG  
AAATGCGTAGATATTAGGAGGAACACCACTGGCGAAGGCGGCTTACTGGACGATGACTGACGTTGAGGCTCGAAAGCGTG  
GGAG  
>ASV:4998:Species:valvarum  
TACGGAGGGTGCAAGCGTTATCCGGAATTACTGGGCGTAAAGCGCACGCAGGCGGCTACCTAAGTCAAGTGTGAAAGCCC  
CGGGCTTAACCTGGGAACTGCATTTGAAACTGGGTGCTAGAGTATGAAAGAGGAAAGCGGAATTCCTAGTGTAGCAGTG  
AAATGCGTAGATATTGGAAGGAACACCGATTGCGAAGGCGAGCTTCTGGGTGATACTGACGCTCATGTGCGAAAGCGTG  
GGAG  
>ASV:4999:Genus:Anaerofustis  
TACGTAGGGAGCGAGCGTTGTCCGGATTTACTGGGCGTAAAGGAGCACGTAGGCGGTTAATTAAGTCAAGTGTGAAAGTTT  
TCGGCTCAACCGGAAAAGTGCATTTGAAACTGGATACTTGAGTATCGGAGAGGTAAGCGGAATTCCTAGTGTAGCGGTG  
AAATGCGTAGAGATTAGGAAGAACACCGTTGGCGAAGGCGGCTTACTGGACGATAACTGACGCTGAGGTGCGAAAGCGTG  
GGAG  
>ASV:5000:Genus:Parabacteroides  
TACGTAGGGAGCAAGCGTTGTCCGGATTTACTGGGTGTAAGGGTGCCTAGGCGGCCTTTTAAGTCAAGCGGTGAAAGTTT  
GTGGCTCAACCATAAATTGCGTTGAAACTGGGTACTTGAGTGTGTTTGAAGTAGGCGGAATGCGTGGTGTAGCGGTG  
AAATGCATAGATATCACGCAGAACCTCCGATTGCGAAGGCGAGCTTACTAACCTGTAACGACATTGATGCTCGAAAGTGTG  
GGTAT  
>ASV:5001:Kingdom:Bacteria  
TACGTAGGGAGCAAGCGTTGTCCGGATTTACTGGGTGTAAGGGAGCGTAGGCGGGGAGACAAGTTGAATGTCTAAACTA  
TCGGCTTAACCTGATAGTCGCGTTCAAACCTATCACTCTTGAGTACAGTAGAGGTGGGCGGAATTCGTGGTGTAGCGGTG  
AATGCTTAGATATCACGAAGAACTCCGATTGCGAAGGCGAGCTCACTAGACTGTTACTGACACTGATGCTCGAAAGTGTG  
GTATC  
>ASV:5002:Genus:Dialister  
TACGTAGGGAGCAAGCGTTGTCCGGATTTATTGGGCGTAAAGCGCGCAGGCGGCTTCCCAAGTCCCTCTTAAAAGTGC  
GGGGCTTAACCCCGTATGGGAAGGAACTGGGAAGCTGGAGTATCGGAGAGGAAAGTGAATTCCTAGTGTAGCGGTGA  
AATGCTTAGATATCACGAAGAACTCCGATTGCGAAGGCGAGCTGCTAAGCTGCAACTGACATTGAGGCTCGAAAGTGTG  
GTATC  
>ASV:5003:Kingdom:Bacteria  
TACGTAGGGTGCAAGCGTTATCCGGATTTACTGGGTGTAAGGGAGCGCAGGCGGTGCGGCAAGTCTGATGTGAAAGCCC  
GGGGCTCAACCCCGTACTGCATTGGAACCTGTCGACTAGAGTGTAGTTGCGGTAGGCGGAATGTATGGTGTAGCGGTG  
AAATGCTTAGAGATCATACAGAACACCGATTGCGAAGGCGAGCTTACCAAATATATCTGACGTTGAGGCACGAAAGCGTG  
GGGAG  
>ASV:5004:Genus:Bacteroides  
TACGTATGGTGCAAGCGTTATCCGGATTTATTGGGTTAAAGGGTGCCTAGGTGGTATTAAAGTCAAGCGGTGAAAGTTT  
GTGGCTCAACCATAAATTGCAAGTGAACCTGGCAGCTTGAGTACAGTAGAGGTGGGCGGAATTCGTGGTGTAGCGGTG  
AAATGCTTAGATATCACGAAGAACTCCGATTGCGAAGGCGAGCTTACTGGACTGTAACGACGCTGATGCTCGAAAGTGTG  
GGTAT  
>ASV:5005:Family:Lachnospiraceae  
TACGTAGGGAGCAAGCGTTATCCGGATTTACTGGGTGTAAGGGAGCGTAGACGGAAGCAAGTCTGATGTGAAAGGCT  
GGGGCTTAACCCAGGACTGCATTGGAACCTGTTGTTCTAGAGTGCAGGAGAGGTAAGCGGAATTCCTAGTGTAGCGGTG  
AAATGCTTAGAGATCATACAGAACACCGATTGCGAAGGCGAGCTTACCAAATATATCTGACGTTGAGGCACGAAAGCGTG  
GGGAG  
>ASV:5006:Family:Eggerthellaceae  
TACGTAGGGGGCAAGCGTTATCCGGATTTACTGGGCGTAAAGCGCGCGCAGGCGGGCCGCTAAGCGGGACCTTAATCTT  
GGGGCTCAACCTCAAGCCGGTCCCGAACTGGCAGCTCGAGTGCAGTAGGGGTAAGCGGAATTCCTAGTGTAGCGGTGG  
AATGCGCAGATATCGGGAAGAACACCGATTGCGAAGGCGAGCTTACTGGCCGACACTGACGCTGAGGCGCGAAAGCTAGG  
GGAGC  
>ASV:5007:Family:Chroococcidiopsaceae  
TACGGAGGATGCAAGCGTTATCCGGAATTATTGGGCGTAAAGCGTCCGAGGTGGCAATTAAGTCTGCTGTTAAAGGTT  
CTGGCTCAACCAGAAACAGGCAAGTGAACCTGAACTAGACTAGAGTGCAGTAGGGGCGAGGGAATTCCTAGTGTAGCGGTG  
AAATGCGTAGAGATTGGGAAGAACACCGTTGGCGAAGGCGCTCTGCTAGGCCGTAACGACACTCATGGACGAAAGCTAG  
GGGAG  
>ASV:5008:Genus:Lactonifactor

TACGGAGGATCCGAGCGTTGTCCGGATTTACTGGGTGTAAGGGAGCGTAGACGGAAGTGCAAGTCTGAAGTAAAAGCCC  
GGGGCTCAACCCCGTACTGCTTTGAAAAGTGTCTTAGAGTGTGGAGAGGTAAGCGGAATTCCTAGTGTAGCGGTG  
AAATGCGTAGATATCACGAAGAACCAGTGGCGAAGGCAGCTCACTAGACTGTCACTGACACTGATGCTCGAAAGTGTG  
GGTAT  
>ASV:5009:Family:Lachnospiraceae  
TACGTAGGGGGCAAGCGTTATCCGGATTTACTGGGTGTAAGGGAGCGTAGACGTTTGGCAAGTCTGATGTAAAAGGCA  
TGGGCTCAACCTGTGGACTGCATTGAAAAGTGTGAGACTTGGAGGCGGAGAGGCAAGCGGAATTCCTAGTGTAGCGGTG  
AAATGCGTAGATATTAGGAGGAACACCAGTGGCGAAGGCAGCTTACTGGACGGTAACGACACTGATGCTCGAAAGTGTG  
GGTAT  
>ASV:5010:Genus:Parabacteroides  
TACGGAGGATGCGAGCGTTATCCGGATTTATTGGGTTAAAGGGTGCCTAGGTGGTGAATTAAGTCAAGCGGTGAAAATTT  
GTGGCTCAACCATAAAATTGCCGTTGAAAAGTGGGTTACTTGGAGTGTGTTTGGAGTAGGCGGAATGCGTGGTGTAGCGGTG  
AAATGCGTAGATATAAGGAAGAACCAGTGGCGAAGGCAGATAACTGGACGGCAACTGACGTTGGGCGCGAAAGCGTG  
GGGAG  
>ASV:5011:Genus:Roseburia  
TACGTATGGTCAAGCGTTATCCGGATTTACTGGGTGTAAGGGAGCGCAGGCGGAAGGCTAAGTCTGATGTAAAAGCCC  
GGGGCTCAACCCCGTACTGCATTGAAAAGTGTGACTAGAGTGTGGAGGGGTAAGCGGAATTCCTAGTGTAGCGGTG  
AAATGCGTAGATATCACGAAGAACCAGTGGCGAAGGCAGCTGCTAAGCTGCAACTGACATTGAGGCTCGAAAGTGTG  
GGTAT  
>ASV:5012:Genus:Christensenellaceae\_R-7\_group  
TACGTAGGGGGCGAGCGTTGTCCGGAATGACTGGGCGTAAAGGGCGTGTAGGCGGCCGATTAAGTCTGGAGTAAAAGTCC  
TGCTTCAAGGTGGGAATTGCTTTGGAGACTGATTGGCTTGGAGTGGGAAGAGGTAAGTGGAAATTCACAGTGTAGCGGTG  
AAATGCGTAGAGATTGGGAGGAACACCAGTGGCGAAGGCAGCTTACTGGGCCGTAACGACGCTGAGGCGCGAAAGCGTG  
GGGAG  
>ASV:5013:Genus:Bacteroides  
TACGTAGGGAGCGAGCGTTGTCCGGAATTTACTGGGTGTAAGGGAGCGTAGGCGGGATGCCAAGTCAAGTGTGAAAACCTA  
TGGGCTTAACCCGTAGACTGCATTGAAAAGTGGCAGTCTTGGAGTACAGTAGAGGTGGGCGGAATTCGTGGTGTAGCGGTG  
AAATGCTTAGATATCACGAAGAACCAGTGGCGAAGGCAGCTCACTAGACTGTTACTGACACTGATGCTCGAAAGTGTG  
GGTAT  
>ASV:5014:Genus:Lachnospiraceae\_UCG-004  
AACGTAGGTCACAAGCGTTGTCCGGAATTTACTGGGTGTAAGGGAGCGTAGACGGGACGCAAGTCTGAAGTAAAATACC  
CGGGCTCAACCCGGAACTGCTTTGAAAAGTGTGTTGCTAGAGTGTGGAGAGGTAAGCGGAATTCCTAGTGTAGCGGTG  
AAATGCGTAGATATTAGGAAGAACCAGTGGCGAAGGCAGCTTCTGACTGTGTCTGACGCTGAGATGCGAAAGCCAG  
GGTAG  
>ASV:5015:Family:Lachnospiraceae  
TACGTAGGGGGCAAGCGTTATCCGGATTTACTGGGTGTAAGGGAGCGTAGGCGGCATGGCAAGTCAAGTGAAGGCAAGCCT  
GGGGCTCAACCCCGAATTGCTTTGAAAAGTGTGAGGCTCAGGCTGAGTGTGGAGGGGTAAGCGGAATTCCTAGTGTAGCGGTG  
AAATGCTTAGAGATCATAACAGAACCAGTGGCGAAGGCAGCTTACCAACTATATCTGACGTTGAGGCACGAAAGCGTG  
GGGAG  
>ASV:5016:Species:kaustophilus/stearothermophilus  
TACGTAGGGGGCGAGCGTTGTCCGGAATTTACTGGGCGTAAAGCGCGCAGGCGGCTCTTAAGTCTGATGTGAAAAGCCC  
ACGGCTCAACCCGTGGAGGGTCAATTGAAAAGTGGGGACTTGGAGGAGGAGAGGAGCGGAATTCACAGTGTAGCGGTG  
AAATGCGTAGAGATGTGGAGGAACACCAGTGGCGAAGGCAGCTTCTGGCCTGCACCTGACGCTGAGGCGCGAAAGCGTG  
GGGAG  
>ASV:5017:Family:Lachnospiraceae  
TACGTAGGTGCAAGCGTTATCCGGATTTACTGGGCGTAAAGGGTGCCTAGGCGGCTTTTTAAGTCAAGTGAAGGCGG  
GGGGCTCAACCCCGAATTGCTTTGAAAAGTGTGACTACTTGGAGTGGCGGAGGGTAAGCGGAATTCCTAGTGTAGCGGTG  
AAATGCGTAGATATTAGGAGGAACACCAGTGGCGAAGGCAGCTTACTGGACGGTACTGACGTTGAGGCTCGAAAGCGTG  
GGGAG  
>ASV:5018:Genus:UC5-1-2E3  
TACGTATGGTCAAGCGTTATCCGGATTTACTGGGTGTAAGGGAGCGCAGGCGGTGCGGCAAGTCTGATGTGAAAAGCCC  
GGGGCTCAACCCCGGACTGCTTTGAAAAGTGTAGAGCTAGAGTGTGGAGAGGCAAGCGGAATTCCTAGTGTAGCGGTG  
AAATGCTTAGATATCACGAAGAACCAGTGGCGAAGGCAGCTCACTAGACTGCAACTGACACTGATGCTCGAAAGTGTG  
GGTAT  
>ASV:5019:Class:Bacteroidia  
TACGTAGGTGACAAGCGTTGTCCGGATTTACTGGGTGTAAGGGGCGCTAGGCGGACTGTCAAGTCAAGTCAAGTGAAGCCT  
GGGGCTCAACCCCGAATTGCTTTGAAAAGTGTGAGGCTAGAGTACAGTAGAGGTGGGCGGAATTCGTGGTGTAGCGGTG  
AAATGCTTAGATATCACGAAGAACCAGTGGCGAAGGCAGCTCACTGGACTGCAACTGACACTGATGCTCGAAAGTGTG  
GGTAT  
>ASV:5020:Genus:Mitsuokella  
TACGTAGGTGGCGAGCGTTGTCCGGAATTTACTGGGCGTAAAGGGAGCGCAGGCGGGAGATCAAGTCTATCTTAAAAGTGC  
GGGGCTCAACCCCGTGGAGGGATGAAAAGTGTGCTTCTTGGAGTGGAGAGGAAAGCGGAATTCCTAGTGTAGCGGTG  
AAATGCGTAGATATTAGGAAGAACCAGTGGCGAAGGCAGCTTCTGGACTGAAAAGTGGAGGCTCGAAAGCGGTG  
GGAGC  
>ASV:5021:Genus:Fusicatenibacter  
TACGTAGGGGGCAAGCGTTATCCGGAATTTACTGGGTGTAAGGGTGCCTAGGTGGTATGGCAAGTCAAGTGAAGGCAAGC  
AGGGCTTAACCCGTGGACTGCATTGAAAAGTGTGCTGGCTTGGAGTGGCGGAGAGGTAAGCGGAATTCCTAGTGTAGCGGTG  
AAATGCGTAGATATTAGGAAGAACCAGTGGCGAAGGCAGCTTACTGGACGGTAACGACGTTGAGGCTCGAAAGCGTG

GGGAG

>ASV:5022:Family:Ruminococcaceae

TACGTAGGGAGCGAGCGTTGTCCGGAATTACTGGGTGTAAGGGTGCCTAGGCGGTCTGAAAAGTCGGATGTGAAATCCC  
CGTGCTTAACATGGGAGCTGCATTGAAACTTTCCGGACTTGAGTGTCCGAGAGGTAAGCGGAATTCCTGGTGTAGCGGTG  
AATGCGTAGATATCGGGAGGAACACCAGTGGCGAAGGCGGCTTACTGGACGACAACGACGCTGAGGCACGAAAGCGTG  
GGGAG

>ASV:5023:Genus:Phascolarctobacterium

TACGGAGGATCCGAGCGTTATCCGGAATTATGGGCGTAAAGAGCATGTAGGCGGTTTTTTAAGTCTGGAGTAAAATGC  
GGGGCTCAACCCCGTATGGCTCTGGATACTGGAAGACTTGAGTGCAGGAGAGGAAAGGGGAATTCACAGTGTAGCGGTGA  
AATGCGTAGATATTGGGAGGAACACCAGTGGCGAAGGCGCCTTCTGGACTGTGTCTGACGCTGATGCTCGAAAGTGTGG  
GTAGC

>ASV:5024:Genus:Megasphaera

TACGTAGGTGGCAAGCGTTGTCCGGAATTATTGGGCGTAAAGGGCGCGCAGGCGGCATCGCAAGTCCGTCTTAAAAGTGC  
GGGGCTTAACCCCGTAGAGGGACCGAAACTGTGAAGCTCGAGTGTCCGAGAGGAAAGCGGAATTCCTAGTGTAGCGGTGA  
AATGCGTAGATATTAGGAGGAACCCGATTGCGAAGGCAGCCTCTGGGATAATACTGACGCTCATGCACGAAAGCGTGG  
GGAGC

>ASV:5025:Kingdom:Bacteria

TACGTAGGGGGCAAGCGTTATCCGGAATTTACTGGGTGTAAGGGAGCGTAGACGGACTGGCAAGTCTGATGTGAAAGGCG  
GGGGCTCAACCCCTGGACTGCATTGAAACTGTTAGTCTGAGTGCAGTAGAGGTAGCGGGAATTCGTGGTGTAGCGGTG  
AATGCTTAGATATCACGAAGAACTCCGATTGCGAAGGCAGCTTACTGGACTGTAACGACGCTGATGCTCGAAAGTGTG  
GGTAT

>ASV:5026:Family:Veillonellaceae

TACGGAGGGTCAAGCGTTAATCCGGAATAGCTGGGCGTAAAGGGCGTGCAGGCGGATCGGTCAAGTCTGTCTTAAAAGTTC  
GGGGCTTAACCCCGTAGGGATGGAAGTCCCAATCTAGAGTATCCGAGAGGAAAGTGGAAATTCCTAGTGTAGCGGTGA  
AATGCGTAGATATTAGGAAGAACACCAGTGGCGAAGGCGACTTACTGGACTGCTACTGACACTGAGGCACGAAAGCGTGG  
GGAGC

>ASV:5027:Genus:Butyricimonas

TACGGAAAGGTCGGGCGTTATCCGGAATTTATTGGGTTTAAAGGGCGGTAGGCGGGACGTCAAGTCAAGCGGTAAAAGACT  
GCAGCTAAACTGTAGCACGCCGTTGAAACTGGCGCCCTCGAGACGAGACGAGGGAGGCGGAACAAGTGAAGTAGCGGTGA  
AATGCATAGATATCACTTGGAAACCCGATTGCGAAGGCAGCTGGCGGGAGCGTAACTGACGCTGAAGCTCAAAAAGCGCG  
GTATC

>ASV:5028:Order:Bacteroidales

TACGGAGGATCCGAGCGTTATCCGGAATTTATTGGGTTTAAAGGGTGCCTAGGCGGCCTTTAAGTCAAGCGGTAAAAGTCT  
GTGGCTCAACCGTAAAATTGCAGTTGATACTGGCAGTCTTGAGTGCAGTAGAGGTGGCGGAATTCGTGGTGTAGCGGTG  
AATGCTTAGATATTAGGAGGAACACCAGTGGCGAAGGCGGCTTCTGGACGACAACGACGCTGAGGCACGAAAGTGTG  
GGGAG

>ASV:5029:Genus:Corynebacterium\_1

AACGTAGGGTCAAGCGTTGTCCGGAATTACTGGGCGTAAAGAGCTCGTAGGTGGTTTGTCCGCTCGTCTGTGAAATCCC  
GGGGCTTAACCCCGGCGTGCAGGCGATACGGGCATAACTTGAGTGTGTAGGGGAGACTGGAATTCCTGGTGTAGCGGT  
GAAATGCGCAGATATCAGGAGGAACACCAGTGGCGAAGGCGAGTCTCTGGGCAATAACTGACGCTGAGGAGCGAAAGCAT  
GGGGA

>ASV:5030:Genus:Holdemania

TACGTAGGTGGCAGCGTTATCCGGAATTTATTGGGCGTAAAGGGTGCAGGCGGTTTTGAAAAGTTAAGGTGAAAGCGT  
GGGGCTTAACCCATACAGCCTTAGAAACTGTGAGTACAGGAGAGGGCAATGGAATTCATGTGTAGCGGTAA  
AATGCGTAGATATTAGGAGGAACACCAGTGGCGAAGGCGGTTGCCGGGCTGTAACGACGCTCATGCACGAAAGCGTGG  
GGAGC

>ASV:5031:Order:Clostridiales

TACGTAGGGGGCAGCGTTGTCCGGAATTTATTGGGCGTAAAGGGTGCCTAGGCGGCGAAGCAAGTCAAGTGTGAAAGACC  
ACGGCTTAACCTGTGGGGGTGCATTTGAAACTGTTTGTCTAGAGTGCAGGAGAGGGAAGCGGAATTCCTAGTGTAGCGGTG  
AATGCTAGATATTAGGAGGAACACCAGTGGCGAAGGCGGCTTCTGGACTGTAACGACGCTGAGGCACGAAAGCGTGG  
GGGAG

>ASV:5032:Order:Izimaplasmatales

AACGTAGGTCACAAGCGTTGTCCGGAATTACTGGGTTTAAAGCGTGCCTAGGCGGCCACTTAAGTCTGTCTGTGAAAGCCC  
ACAGCTTAACCTGTGGAGGGTGCATGGAAGTGCAGGCGTTGAATCTAGGAGAGGTAAGTGGAAATTCATGTGTAGCGGTGA  
AATGCTTAGATATTAGGAGGAACACCAGTGGCGAAGGCGGCTTACTGGTCTAGAATTGACGCTGATGCACGAAAGCGTGG  
GGTAG

>ASV:5033:Family:Ruminococcaceae

TACGTAGGGAGCGAGCGTTGTCCGGAATTTACTGGGTGTAAGGGTGCCTAGGCGGGCTGTCCGAGTCAAGTGTGAAATACC  
GGGGCTTAACCCCGGCGTGCATTTGAAACTGATTTCTTGAGTACTGGAGAGGCAATCGGAATTCCTAGTGTAGCGGTG  
AATGCGTAGATATTAGGAGGAACACCAGTGGCGAAGGCGGATTGCTGGACGACAACGACGCTGAGGCACGAAAGTGTG  
GGGAG

>ASV:5034:Family:Ruminococcaceae

TACGTAGGTGGCAAGCGTTGTCCGGAATTACTGGGTGTAAGGGAGCGTAGGCGGGCAGGCAAGTCAAGTGCGAAAACCTA  
TGGGCTCAACCTGTAGATTGCATTTGAAACTGTTGTTCTTGAGTGAAGTAGAGGTAAGCGGAATTCCTAGTGTAGCGGTG  
AATGCGTAGATATCGGGAGGAACACCAGTGGCGAAGGCGACCTACTGGGCACCAACGACGCTGAGGCTCGAAAGCATG  
GGTAG

>ASV:5035:Class:Bacteroidia

TACGGAGGATCAAGCGTTATCCGGAATTTATTGGGTGTAAGGGTGCCTAGGCGGCCGAGCAAGTCAAGTGTGAAAACCTA

TGGGCTTAACCCATAACGTGCAATTGAAACTGTCCGGCTTGAGTGAAGTAGAGGTAGGCGGAATTCGCCGTGTAGCGGTG  
AAATGCTTAGATATGGCGAAGAAGCTCCGATTGCGAAGGCAGCTGACGGGTGCGTAACTGACGCTCATGCTCGAAAGTGCG  
GGTAT  
>ASV:5036:Genus:Ruminococcaceae\_UCG-010  
TACGTAGGTGGCAAGCGTTATCCGGATTTACTGGGTGTAAGGGTGTGTGGGCGGGAAACAAGTCAGATGTGAAATGCC  
AAGGCTAAACCATGGAGCTGCATTTGAAACTGTTTTTCTTGAGAGTGGGAGAGGTAAGCGGAATTCGCCGTGTAGCGGTG  
AAATGCGTAGATATCGGAGGAACACCAGTGGCGAAGGTGGCTTACTGGACCATTACTGACGCTGAGACACGAAAGCGTG  
GGGAG  
>ASV:5037:Family:Ruminococcaceae  
TACGTAGGTTGCAAGCGTTGTCCGGATTTACTGGGTGTAAGGGCGGTAGGCGGAGATGCAAGTTAGGAGTAAATCTA  
TGGGCTCAACCCATAAACTGCTTCTAAAAGTGTATCCCTTGAGTATCGGAGAGGCAAGCGGAATTCCTAGTGTAGCGGTG  
AAATGCTTAGATATCAGGAAGAAGCTCCGATTGCGAAGGCAGCTACCCGAGCGCAACTGACGCTGAAAGTGTGCG  
GGTAT  
>ASV:5038:Family:Coriobacteriales\_Incertae\_Sedis  
TACGTATGGAGCAAGCGTTATCCGGATTTATTGGGCGTAAAGCGCGGTAGGCGGCTTGTAAAGCAAGGTCTTAAATCTT  
GGGGCTCAACCTCAAGCCGGATCTTGAAGTGGCAGGCTCGAGTATGTTAGAGGAAAGTGAATTCCTAGTGTAGCGGTG  
AATGCGCAGATATTGGGAAGAACACCAGTGGCGAAGGCAGCTTCTGGGCCATTACTGACGCTGAGGTGCGAAAGTGTG  
GTAGC  
>ASV:5039:Kingdom:Bacteria  
AACGTAGGGGCGAGCGTTGTCCGGAAATTATTGGGCGTAAAGGGCGGTAGACGGCTGAGTAAAGTACTGGTAAAGCCC  
AGCTTTTAAAGCTGGAATTGCCGGTAATACTGTTCACTTGAAGTGCAGGAGAGGGAAGCGGAATTCGCCGTGTAGCGGTG  
AAATGCTTAGATATGGCGAAGAAGCTCCGATTGCGAAGGCAGCTGACGGGTGCGTAACTGACGCTCATGCTCGAAAGTGCG  
GGTAT  
>ASV:5040:Family:Lachnospiraceae  
TACGTAGGGGGCAAGCGTTATCCGGATTTACTTGGTGTAAAGGGAGCGTAGACGGCGAAGCAAGTCTGAAGTAAAACCC  
GGGGCTCAACCCCGGACTGCATTGAAAAGTGTTCATCTAGAGTGCAGGAGAGGTAAGTGAATTCCTAGTGTAGCGGTG  
AAATGCGTAGATATTAGGAGGAACACCAGTGGCGAAGGCGGCTTACTGGACAGTAACTGACGCTGAGGCTCGAAAGCGTG  
GGGAG  
>ASV:5041:Family:Lachnospiraceae  
TACGTAGGGGGCAAGCGTTATCCGGATTTACTTGGGCGTAAAGGGAGCGTAGACGGCGCAAGTCTGATGTAAAAGGCA  
GGGGCTTAAACCCCTGGACTGCATTGAAAAGTGTGTGCTTGAAGTGCAGGAGGGTAAGCGGAATTCCTAGTGTAGCGGTG  
AAATGCGTAGATATTAGGAGGAACACCAGTGGCGAAGGCGGCTTACTGGGCACCAACTGACGCTGAGGCTCGAAAGCATG  
GGTAG  
>ASV:5042:Order:Lactobacillales  
TACGTAGGGGGCAAGCGTTATCCGGATTTACTTGGTGTAAAGGGAGCGTAGACGGGTGTGGCAAGTCTGATGTAAAAGGCA  
TGGGCTCAACCTGTGGACTGCATTGAAAAGTGGCAGACTTGAAGTGCAGAAAGAGGAGTGAAGTCCATGTGTAGCGGTG  
AAATGCGTAGATATTAGGAGGAACACCAGTGGCGAAGGCGGCTTCTGCTGTAAGTGAAGTGTGAGGCTCGAAAGCGTG  
GGTAG  
>ASV:5043:Genus:Prevotella  
TACGGAAGGTTCCGGCGTTATCCGGATTTATTGGGTTTAAAGGGAGCGTAGGCCGTTTGGTAAGCGTGTGTGAAATGTA  
GGAGCTCAACTTCTAGATTGACGCGCAACTGTGAGACTTGAAGTGCAGCAACTGAGCGGAATTCATGGTGTGCGGTG  
AAATGCTTAGATATCATGAAGAAGCTCCGATTGCGAAGGCAGCTTACGGGAGCGCAACTGACGCTGAAGTGTGAAAGTGTG  
GGTAT  
>ASV:5044:Family:Lachnospiraceae  
TACGTAGGGGGCAAGCGTTGTCCGGAACTTACTGGGTGTAAGGGAGCGCAGGCGGAGAAGCAAGTCAAGTGTGAAAACGA  
TGGGCTTAACTCATCGACTGCCATTGAAAAGTGTGACTCGAGTGCAGGAGGGTAAGCGGAATTCCTAGTGTAGCGGTG  
GAAATGCGTAGATATTAGGAGGAACACCAGTGGCGAAGGCGGCTTACTGGACGTAAGTGAAGTGTGAGGCTCGAAAGCGTG  
GGGA  
>ASV:5045:Family:Ruminococcaceae  
TACGTAGGTGGCAAGCGTTGTCCGGATTTACTGGGTGTAAGGGCGGTAGGCGGGACTGCAAGTCTGATGTGTAATCTG  
GTGGCTCAACCCAAACTGCATTGAAAAGTGTAGTCTTGAAGTATCGGAGAGGCAGGCGGAATTCCTAGTGTAGCGGTG  
AAATGCGTAGATATTAGGAGGAACACCAGTGGCGAAGGCGGCTGCTGGACTGTTACTGACACTGAGGCACGAAAGCGTG  
GGGAG  
>ASV:5046:Genus:Asaccharospora  
TACGGAGGATCCGAGCGTTATCCGGATTTATTGGGTTTAAAGGGAGCGTAGGCGGCTTTTAAAGTCAAGGAGTAAAAGGCT  
ACGGCTCAACCGTAGTAAGCTCTTGAAGTGGAGACTTGAAGTGCAGGAGAGGAGAGTGAATTCCTAGTGTAGCGGTG  
AATGCGTAGATATCGAGAGGAACACTCGTGGCGAAGGCGGTTCTTGACATTAAGTGAAGTGTGAGGCTCGAAAGCGTG  
GGAGC  
>ASV:5047:Family:Ruminococcaceae  
TACGGAGGTTGCAAGCGTTAATCGGAATTTACTGGGTGTAAGGGAGCGCAGGCGGGAGACAAGTTGGAAGTAAAATCTA  
TGGGCTCAACCCATAAACTGCTTTCAAAGTGTTTTTCTTGAGTGCAGAGGTAGGCGGAATTCGCCGTGTAGCGGTG  
GAATGCGTAGATATCAGGAAGAAGCTCCGATTGCGAAGGCAGCTTGTGGACTGTAAGTGAAGTGTGAGGCTCGAAAGTGTG  
GGTAT  
>ASV:5048:Genus:Oscillibacter  
TACGTAGGGAGCAAGCGTTGTCCGGATTTACTGGGTGTAAGGGTGGTGGTGGGCTTGTGAAAGTCAAGTCAAGTGTGAAATCTA  
TGGGCTCAACCCATAAACTGCTTTGAAAAGTGTGGGCTTGAAGTACCAGGAGAGGTTATCGGAATTCCTTGTGTAGCGGTG  
AAATGCGTAGATATAAGGAAGAACACCAGTGGCGAAGGCGGATAACTGGACGGCAACTGACGCTGAGGCGGAAAGCGTG  
GGGAG

>ASV:5049:Genus:Akkermansia  
TACAGAGGTCTCAAGCGTTGTTCCGGAATCACTGGGCGTAAAGCGTGCCTAGGCTGTTTCGTAAGTCGTGTGTGAAAGGCA  
TGGGCTCAACCTGTGGACTGCATTGAAACTGTCATACTTGAAGTCCCGGAGGGTAAGCGGAATTCCTAGTGTAGCGGTG  
AAATGCGTAGATATCGAGAGGAACACTCGTGGCGAAGGCGGGTTCCTGGACATTAAC TGACGCTGAGGCACGAAGCCAG  
GGGAG

>ASV:5050:Genus:Intestinimonas  
TACGTAGGTGGCAAGCGTTATCCGGATTTACTGGGTGTAAAGGGCGTGTAGGAGGGAGTGAAGTCAGATGTGAAAAC TA  
TGGGCTCAACCCGACTGCATTGAAACTGTACTTCTTGAAGTGCAGAGGAGGAGGTAAGCGGAATTCCTAGTGTAGCGGTG  
AAATGCGTAGATATAGGGAGGAACACCAGTGGCGAAGGCGGCTCTGGACATTAAC TGACGCTGAGGCAGAAAGCGTG  
GGGAG

>ASV:5051:Genus:Bacteroides  
TACGGAGGATCCGAGCGTTATCCGGATTTATTGGGTTTAAAGGGAGCGTAGGTGGACTGGTAAGTCAGTTGTGAAAAGTTT  
GCGGCTCAACCCGACTGCATTGAAACTGCCAATCTAGAGTACC GGAGGGTAAGTGAATTCCTAGTGTAGCGGTG  
AAATGCTTAGATATCACGAAGAACTCCGATTGCGAAGGCAGCTGCTAAGCTGCAACTGACATTGAGGCTCGAAAGGTG  
GGTAT

>ASV:5052:Order:Clostridiales  
TACGTAGGGAGCGAGCGTTGTCGGAACTTACTGGGTGTAAAGGGTGCCTAGGCGGCCGAGCAAGTCAGTTGTGAAAAC TA  
TGGGCTCAACCCGACTGCATTGAAACTGTCGGCTTGAAGTGCAGAGGGTAAGCGGAATTCCTAGTGTAGCGGTG  
AAATGCGTAGATATTAGGAGGAACACCAGTGGCGAAGGCGGCTTACTGGACGTAAC TGACGTTGAGGCTCGAAAGCGTG  
GGGAG

>ASV:5053:Kingdom:Bacteria  
TACGTAGGGGGCAAGCGTTATCCGGATTTACTGGGTGTAAAGGGAGCGTAGACGGATGGACAAGTCGTAGTGTGAAAAGCT  
GGGGCTCAACCCGACTGCATTGAAACTGCCCGTCTTGAAGTGCAGAGGGTAAGCGGAATTCCTAGTGTAGCGGTG  
GAATGCGCAGATATCGGAAGAACACCAGTGGCGAAGGCAGCTGCTGGGCCCAACTGACGCTGAGGCAGAAAGCTAG  
GGGAG

>ASV:5054:Genus:DTU089  
TACGTAGGGGGCAAGCGTTATCCGGATTTACTGGGTGTAAAGGGTGCCTAGGCGGATCTGCAAGTCAGTAGTAAAATCCC  
AGGGCTTAACCCGACTGCATTGAAACTGTGGTCTTGAAGTGCAGAGGGTAAGCGGAATTCCTAGTGTAGCGGTG  
AAATGCGTAGATATCGTAGGAACACCAGTGGCGAAGGCGGCTTCTGGACTGAAACTGACGCTGAGGCAGAAAGCGTG  
GGGAG

>ASV:5055:Order:Bacteroidales  
TACGGAGGATCCGAGCGTTATCCGGATTTATTGGGTTTAAAGGGTGCCTAGGCTGTTTTTTAAGTTAGAGGTGAAAAGCTC  
GACGCTCAACGTCGAAATTGCCTCTGATACTGAGAGACTAGAGTGTAGTTGCGGAAGGCAGAAATGTGTGGTGTAGCGGTG  
AAATGCGTAGATATTAGGAGGAACACCAGTGGCGAAGGCGGCTTACTGGACTGTAAC TGCGCTGAGGCTCGAAAGCGTG  
GGGAG

>ASV:5056:Class:Bacteroidia  
TACGGAGGATCCGAGCGTTATCCGGATTTATTGGGTTTAAAGGGAGCGCAGACGGGAGATTAAGTCAGTTGTGAAAAGTTT  
GCGGCTCAACCGTAAAATTGCAAGTTGAAACTGGCAGACTAGAGTGCAGGAGAGGAAAGGGGAATTCCTAGTGTAGCGGTG  
AAATGCGTAGATATTGGGAGGAACACCAGTGGCGAAGGCGCTTCTGGACGACAAC TGACGCTGAGGCAGAAAGCTGTG  
GGGAG

>ASV:5057:Genus:Ruminococcaceae\_UCG-010  
TACGTAGGTGGCGAGCGTTATCCGGAATTAAGGGTGTGTAGGCGGGGAGGCAAGTCAGATGTGAAAACCA  
AAGGCTCAACCTTTGGCTTGCATTTGAAACTGTTTTCTTGAAGTGGGAGAGGTAACCGGAATTCCTAGTGTAGTAGTG  
AAATGCGTAGATATTAGGAGGAACACCAGTGGCGAAGGCGGTTACTGGACCACAAC TGACGCTGAGACACGAAAGCGTG  
GGGAG

>ASV:5058:Family:Enterobacteriaceae  
TACGGAGGGTCAAGCGTTAATCCGGAATTAAGGGTGTAAAGCGCACGAGGCGGTTTGTAAAGTCAGATGTGAAAATCCC  
CGGGCTCAACCTGGAACTGCATCTGATACTGGCAAGCTTGAAGTCTCGTAGAGGGGGTAGAATTCATGTGTAGCGGTG  
GAATGCGTAGATATCACGCAGAACTCCGATTGCGAAGGCAGCTTACTAAACCATAAC TGACACTGAAGCACGAAAGCGTG  
GGGAT

>ASV:5059:Species:denticolens  
TACGTAGGGTCAAGCGTTGTCGGATTTATTGGGCGTAAAGGGCTCGTAGGCGGTTCTGTCGCTGTTGTTGTTGAAAAGCCC  
GCTGCTTAACGGTGGGTTTGCCTTGGATACGGGCGGGCTTGAAGTGCAGTAGGGGAGGCTGGAATTCCTAGTGTAAAGCGTG  
GAATGTGTAGATATCGGAAGAACACCTATGGCGAAGGCAGTCTCTGGGCTGTTACTGACGCTGAGGAGCGAAAGCGTG  
GGGAG

>ASV:5060:Order:Clostridiales  
TACGGAGGATCCGAGCGTTATCCGGATTTATTGGGTTTAAAGGGGGCGTAGATGGATGTTTAAAGTCAGTTGTGAAAAGCCC  
GGGGCTCAACCCGGTACTGCTTTGAAACTGTTTGAAGTGCAGGAGAGGAGAGTGAATTCCTAGTGTAGCGGTG  
AAATGCGTAGATATTAGGAGGAACACCAGTGGCGAAGGCGGCTCTCTGGACTGTAAC TGACACTGAGGCACGAAAGCGTG  
GGGAG

>ASV:5061:Family:Ruminococcaceae  
TACGTAGGGAGCAAGCGTTGTCGGAACTTACTGGGTGTAAAGGGAGCGTAGGCGGGGCGCAAGTTGAATGTGAAAATCTA  
TGGGCTCAACCCATAAACTGCGTTCAAACCTGTTGCTCTTGAAGTGAAGTAGAGGTAGGCGGAATTCCTAGTGTAGCGGTG  
AAATGCGTAGATATTGGGAGGAACACCAGTGGCGAAGGCGGCTTACTGGACGTAAC TGACGTTGAGGCTCGAAAGCGTG  
GGGAG

>ASV:5062:Family:Clostridiaceae\_1  
TACGTAGGTGGCGAGCGTTGTCGGATTTACTGGGCGTAAAGGGAGCGTAGGCGGACTTTTAAAGTGAAGTGTGAAAATACC  
CGGGCTCAACTGGGCTGCTGCAATTTCAAACCTGGAAGTCTAGAGTGCAGGAGAGGAAAGGGGAATTCCTAGTGTAGCGGTG

GAATGCGTAGATATCGGGAGGAACACCAGTGGCGAAGGCGGCTACTGGGCACCAACTGACGCTGAGGCTCGAAAGTGTG  
GGTAG  
>ASV:5063:Family:Christensenellaceae  
TACGTAGGGAGCGAGCGTTGTCCGGAATTACTGGGCGTAAAGGGTGCCTAGGCGGTTTGGTAAGTCAGATGTGAAATACC  
CGGGCTTAACCCGGGGCTGCATCTGATACTGTCAGACTTGAGTGCAGGAGAGGAAAGCGGAATTCCTAGTGTAGCGGTG  
AAATGCGTAGATATTAGGAGGAACACCAGTGGCAAAGGCGGCTTTCTGGACTGTAACCTGACGCTGAGGCACGAAAGCGTG  
GGGAG  
>ASV:5064:Genus:Lactobacillus  
TACGTAGGTGGCAAGCGTTATCCGGATTTATTGGGCGTAAAGCGAGCGCAGGCGGTTTTTAAAGTCTGATGTGAAAGCCC  
TCGGCTTAACCGAGGAAGCGCATCGGAACTGGGAACTTGAGTGCAGAAGAGGACAGTGGAAGTCCATGTGTAGCGGTG  
AAATGCGTAGATATATGGAAGAACACCAGTGGCGAAGGCGGCTGCTGGGCTTTAACTGACGCTGAGGCACGAAAGCGTG  
GGTAG  
>ASV:5065:Genus:Candidatus\_Soleaferrea  
TACGTAGATGGCGAGCGTTGTCCGGAATTACTGGGTGTAAGGGAGTGAAGCGGGATCATAAGTTGCGTGTGAAATGCA  
GGGGCTCAACCCCTGAACTGCGCGCAAACCTGTGGTCTTGAGTGAAGTAGAGGCAGGCGGAATTCCTGGTGTAGCGGTG  
GAATGCGTAGATATCGGGAGGAACACCAGTGGCGAAGGCGGCTGCTGGGCTTTTAACTGACGCTGAGGCTCGAAAGCATG  
GGGAG  
>ASV:5066:Family:Ruminococcaceae  
TACGTAGGGTGAAGCGTTGTCCGGAATTACTGGGTGTAAGGGAGCGTAGGCGGGTCAGCAAGTTGGATGTGAAATGTA  
CCGGCTCAACTGGTAACTGCATTCAAACCTGTTGGTCTTGAGTGAAGTAGAGGCAGGCGGAATTCCTGGTGTAGCGGTG  
AAATGCTTAGATATACGAAGAAGTCCGATTGCGAAGGCAGCCTGCTAAGCTGCAACTGGCATTGAGGCTCGAAAGTGTG  
GGTAG  
>ASV:5067:Class:Bacteroidia  
TACGGAGGATCAAGCGTTATCCGGATTTATTGGGTTTAAAGGGTGCCTAGGCGGCCGATCAAGTCAGGTGTGAAAGACC  
CGTGCTTAACATGGGGTTGCATTTGAAACTGTTGGCTTGAGTATGGGAGAGGCAAGCGGAATTCCTGGTGTAGCGGTG  
AAATGCGTAGGGATCGGGAGGAACACCAGTGGCGAAGGCGGCTGCTGGGCTTTAACTGACGCTGAGGCACGAAAGCGTG  
GGTAG  
>ASV:5068:Genus:Bacteroides  
TACGTATGGTGAAGCGTTATCCGGATTTACTGGGTGTAAGGGAGCGCAGGCGGTGCGGCAAGTCTGATGTGAAAGCCC  
GGGGCTCAACCGTAAATTCAGTGTGAAACTGGCAGTCTTGAGTACAGTAGAGGTGGGCGGAATTCCTGGTGTAGCGGTG  
AAATGCTTAGATATACGAAGAAGTCCGATTGCGAAGGCAGCCTGCTAAGCTGCAACTGACATTGAGGCTCGAAAGTGTG  
GGTAG  
>ASV:5069:Genus:Ruminococcaceae\_UCG-010  
TACGTAGGTGGCGAGCGTTATCCGGAATTACTGGGTGTAAGGGTGTGTAGGCGGGACGACAAGTCAGATGTGAAAATTG  
TAGGCTCAACCTGGAAGTGCATTTGAAACTGCCGTTCTTGAGAGTCCGAGAGGTAATGGAATTCCTGGTGTAGCGGTG  
AAATGCGTAGATATACGAAGAAGTCCGATTGCGAAGGCAGCCTGCTAAGCTGCAACTGACATTGAGGCTCGAAAGTGTG  
GGTAG  
>ASV:5070:Family:Lachnospiraceae  
TACGTATGGTGAAGCGTTATCCGGATTTACTGGGTGTAAGGGAGCGCAGGCGGTGCGGCAAGTCAGAAGTGAAGGCA  
TGGGCTCAACCTGTGGACTGCATTGGAAGTCCCATCTTGAGTGCCGGAGGGTAAGCGGAATTCCTAGTGTAGCGGTG  
AAATGCGTAGATATCGGGAGGAACACCAGTGGCGAAGGCGGCTACTGGGCACCAACTGACGCTGAGGCTCGAAAGTGTG  
GGTAG  
>ASV:5071:Family:Ruminococcaceae  
TACGTAGGGAGCGAGCGTTATCCGGATTTACTGGGTGTAAGGGAGCGTAGGCGGCACGCCAAGTCAGATGTGAAATCCA  
CGGGCTCAACTCGTGAAGTGCATTTGAAACTGTTTTCTTGAGTATCGGAGAGGCAATCGGAATTCCTAGTGTAGCGGTG  
AAATGCGTAGATATCGGGAGGAACACCAGTGGCGAAGGCGGCTACTGGGCACCAACTGACGCTGAGGCTCGAAAGCATG  
GGTAG  
>ASV:5072:Genus:Succinispira  
AACGTAGGTCAAGCGTTGTCCGGAATTACTGGGTGTAAGGGTGCCTAGGTGGTATGGCAAGTCAGAAGTGAAGAACCC  
AGGGCTTAACCTCGGACTGCTTTTGAAGTGTGCAACTGAGTGCAGGAGAGGAAAGGGGAATTCCTAGTGTAGCGGTG  
AAATGCGTAGATATTGGGAGGAACACCAGTGGCGAAGGCGGCTTTCTGGACTGTGCTGACGCTGAGATGCGAAAGCCAG  
GATAG  
>ASV:5073:Class:Bacteroidia  
AACGTAGGTCAAGCGTTGTCCGGAATTACTGGGCGTAAAGGGAGCGTAGACGGAAGCAAGTCTGATGTGAAAGGCT  
GGGGCTTAACCCAGGACTGCATTGGAAGTGTTTTTCTTGAGTGCAGCAGAGGTAGGCGGAATTCCTGGTGTAGCGGTG  
AAATGCTTAGATATACGAAGAAGTCCGATTGCGAAGGCAGCTTACTGGACTGTAACCTGACGCTGATGCTCGAAAGTGTG  
GGTAG  
>ASV:5074:Order:Lactobacillales  
TACGGAGGATCCGAGCGTTATCCGGATTTATTGGGCGTAAAGCGAGCGCAGGCGGTTAGATAAGTCTGAAGTTAAAGGCT  
GTGGCTCAACCATAGTTCGCTTTGAAACTGTCAAACCTTGAGTGGAGTAGAGGCAAGCGGAATTCCTAGTGTAGCGGTG  
AATGCGTAGATATTGGGAGGAACACCAGTGGCGAAGGCGGCTTCTGGGCTTAACTGACGCTGAGGCTCGAAAGTGTG  
GGAGC  
>ASV:5075:Family:Ruminococcaceae  
TACGTAGGGAGCAAGCGTTGTCCGGAATTACTGGGTGTAAGGGTGCCTAGGCGGATTGGCAAGTCAGAAGTGAATCCA  
TGGGCTTAACCCATGAAGTGTGTTTTGAAACTGTTAGTCTTGAGTGAAGTAGAGGCAGGCGGAATTCCTAGTGTAGTGTG  
AAATGCGTAGATATTGGAAGAACACCAGTGGCGAAGGCAGCCTCCTGGGATAACACTGACGCTCATGCACGAAAGCGTG  
GGGAG  
>ASV:5076:Family:Family\_XIII

TACGTAGGGGGCAAGCGTTATCCGGAATTATTGGGCGTAAAGAGTGCCTAGGTGGTCTACTAAGCGCGAGGTGAAAGGCA  
ATGGCTCAACCATTTAGCCTTGCAGAACTGGCAGACTTGTAGTGAAGAGAGGAAAGCGGAATTCCTAGTGTAGCGGTGA  
AATGCGTAGATATTAGGAGGAACACCAGTGGCGAAGGCGGCTTCTGGACTGTAACGTACGCTGATGCTCGAAAGTGTGG  
GTATC

>ASV:5077:Family:Ruminococcaceae

TACGTAGGTGGCAAGCGCTGTCCGGATTTACTGGGTGTAAGGGCGTGTAGCCGGGAAGGCAAGTCAGATGTGAAATCCA  
CGGGCTCAACTCGTGAAGTGCATTTGAAACTGTTTTCTTGTAGTATCGGAGAGGCAACCGGAATTCCTGGTGTAGCAGTG  
AATGCGTAGATATCGAGAGGAACACTCGTGGCGAAGGCGGTTCTTGACATTAACGTACGCTGAGGCACGAAGGCCAG  
GGGAG

>ASV:5078:Genus:Family\_XIII\_AD3011\_group

TACGTAGGGGGCAAGCGTTATCCGGAATTATTGGGCGTAAAGGGTACGTAGGTGGTTACCTAAGCACAGGGTATAAGGCA  
ATAGCTTAACATTTGTCGCTTGTGAAGTGGGCTACTTGTAGTGCAGGAGAGGAAAGCGGAATTCCTAGTGTAGCGGTGA  
GATGCGTAGATATTAGGAGGAACACCAGTGGCGGAGGCGGCTTCTGGACTGTAACGTACACTGAGGTACGAAAGCGTGG  
GGAGC

>ASV:5079:Order:Clostridiales

TACGTAGGGAGCAAGCGTTGTCCGGATTTACTGGGTGTAAGGGTGCCTAGGCGGCTTTGCAAGTCAGATGTGAAATCCA  
TGGGCTCAACCCATGAAGTGCATTTGAAACTGTAGATCTTGTAGTGTGCGGAGGGCAATCGGAATTCCTAGTGTAGCGGTG  
AATGCGTAGATATCACGAAGAACCTCCGATTGCGAAGGCAGCTTACTGGATTGTAACGTACGCTGATGCTCGAAAGTGTG  
GGTAT

>ASV:5080:Family:Ruminococcaceae

AACGTAGGTCAACAGCGTTGTCCGGAATTACTGGGTGTAAGGGGGCGCAGGCGGGAGAACAAGTTGGAAGTAAATCCA  
TGGGCTCAACCCATGAAGTGCATTTCAAAGTGTCTTGTAGTATCGGAGAGGCAATCGGAATTCCTAGTGTAGCGGTG  
AGATGCGTAGATATTAGGAGGAACACCAGTGGCGAAGGCGGATTGCTGGACGACAACGTACGCTGAGGCAGGCGAAAGCGTG  
GGGAG

>ASV:5081:Genus:Bacteroides

TACGTATGGTCAAGCGTTATCCGGATTTACTGGGTGTAAGGGTGCCTAGGCGGCTTTGCAAGTCAGATGTGAAATCTA  
TGGGCTCAACCCATAAAGTGCATTTGATACTGGCAGTCTTGTAGTACAGTAGAGGTGGCGGGAATTCCTGGTGTAGCGGTG  
AAATGCTTAGATATCACGAAGAACCTCCGATTGCGAAGGCAGCTTACTGGATTGTAACGTACGCTGATGCTCGAAAGTGTG  
GGTAT

>ASV:5082:Genus:Clostridium\_sensu\_stricto\_1

TACGTAGGTGGCGAGCGTTGTCCGGATTTACTGGGCGTAAAGGGAGCGTAGGCGGATTTTAAAGTGTAGTGTGAAATCTA  
CGTGTAACTGAGTGTGCTGATTTCAAAGTGTCTAGAGTGCAGGAGAGGAGAAGGGAATTCCTAGTGTAGCGGTG  
AAATGCGTAGAGATTAGGAAGAACACCAGTGGCGAAGGCGCTTCTCTGGACTGTAACGTACGCTGAGGCCTCGAAAGCGTG  
GGGAG

>ASV:5083:Species:defluvii/lusatiense

TACGAAGGGGGCTAGCGTTGTTCGGAATTACTGGGCGTAAAGGGCAGCTAGGCGGATTCGATCAGTTAGGGGTGAAATCCC  
AGGGCTCAACCTCGAAGTGCATTTGAAACTGTGATCTCGAGTTGAGAGAGGTGAGTGAATTCCTAGTGTAGAGGTG  
AAATGCTTAGATATTAGGAGGAACACCAGTGGCGAAGGCGGCTACTGGCTCGATACTGACGCTGAGGTGCGAAAGCGTG  
GGGAG

>ASV:5084:Genus:Flavonifractor

TACGTAGGGGGCAAGCGTTATCCGGATTTACTGGGTGTAAGGGGCGTGTAGGCGGATTGCAAGTCAGATGTGAAAGTGTG  
GGGGCTCAACCTCGAAGTGCATTTGAAACTGTAGTTCTTGTAGTGTGAGAGGCAATCGGAATTCCTGTGTAGCGGTG  
AAATGCATAGATATAACGAAGAACCTCAATTGCGCAGGCAGCTTACTAACTACAACGTACGCTGAGGCACGAAAGCGTG  
GGTAT

>ASV:5085:Family:Lachnospiraceae

TACGTAGGGGGCAAGCGTTATCCGGATTTACTGGGTGTAAGGGGAGCGTAGACGGCGCAGCAAGTCTGATGTGAAAGGCA  
GGGGCTTAACCTCGAAGTGCATTTGAAACTGTGCTTGTAGTGTGAGAGGGAAGCGGAATTCCTAGTGTAGCGGTG  
AAATGCGTAGATATCACGAAGAACCTCCGATTGCGAAGGCAGCTACTAGACTGTTACTGACACTGATGCTCGAAAGTGTG  
GGTGT

>ASV:5086:Genus:Solobacterium

TACGTAGGTGGCGAGCGTTATCCGGAATTATTGGGCGTAAAGGGTGCCTAGGCGGCTGTTAAGTAAGTGGTTAAATTTGT  
TGGGCTCAACCCATTCAGCCACTTAAACTGGCAGGCTAGAGTATTGGAGAGGCAAGTGAATTCCTAGTGTAGCGGTAA  
AATGCGTAGATATAGGAGGAACACCAGTGGCGAAGGCGGCTTCTAGCCAAAGACTGACGCTCATGCACGAAAGCGTGG  
GGAGC

>ASV:5087:Family:Clostridiaceae\_2

TACGGAAGGTCCGGGCTTATCCGGAATTACTGGGCGTAAAGGGTGCCTAGGTGGTTTCTAAGTCAGAGGTGAAAGGCT  
ACGGCTCAACCTAGTAAGCCTTTGAAACTGGGAACTTGTAGTGCAGGAGAGAGAGTGAATTCCTGGTGTAGCGGTGG  
AATGCGTAGATATCGGAGGAACACCAGTGGCGAAGGCGGCTACTGGGCACCAACTGACGCTGAGGCTCGAAAGTGTGG  
GTAGC

>ASV:5088:Order:Bacteroidales

TACGGAAGGTCCGGGCTTATCCGGATTTATTGGGTTTAAAGGGAGCGTAGGCGGATTGTTAAGTCAGTTGTGAAAGTTT  
GCGGCTCAACCGTAAATGAGTTGATACTGGCAGTCTTGTAGTGCAGTAGAGGTATGCGGAATGCGTTGTGTAGCGGTG  
AAATGCATAGATATGACGAGAACTCCGATTGCGAAGGCAGCATACCAACTCGGACTGACGCTGAGGCTCGAAAGCGTG  
GGTAT

>ASV:5089:Genus:Prevotella

TACGGAAGGTCCGGGCTTATCCGGAATTATTGGGTTTAAAGGGAGCGTAGGCGGCCAGGTAAGCGTGTGTGAAATGTG  
CCGGCTCAACCGGTGAATGACGCGCAACTGTCTGGCTTGTAGTGCAGGTAAGCAGGCGGAATTCATGGTGTAGCGGTG  
AAATGCTTAGATATCATGAGGAACCTCCGATTGCGAAGGCAGCTTGTGCAAGTGCAGTGCAGCTGACGCTGATGCTCGAAAGTGGC

GGTAT

>ASV:5090:Genus:Afipia

TACGAAGGGGGCTAGCGTTGCTCGGAATCACTGGGCGTAAAGGGTGCCTAGGCGGGTCTTTAAGTCAGAGGTGAAATCCT  
GGAGCTCAACTCCAGAACTGCCTTTGATACTGAGGATCTTGAGTTCCGGAGAGGTGAGTGGAAGTCCGAGTGTAGAGGTG  
AAATTCGTAGATATTCGCAAGAACCAGTGGCGAAGGCGGCTACTGGCCGATACTGACGCTGAGGCACGAAAGCGTG  
GGGAG

>ASV:5091:Phylum:Firmicutes

TACGTAGGTGGCAGCGTTATCCGGAATGATTGGGCGTAAAGGGTGCCTAGGTGGCAGATCAAGTCTGGAGTAAAGGTA  
TGGGCTCAACCCGACTGGCTTTGAAACTGTCTACTAGAGTGTCCGAGGGGTAAGCGGAATTCCTAGTGTAGCGGTGA  
AATGCGTAGATATTAGGAGGAACACCAGTGGCGAAGGCGGCTACTGGACGATAACTGACGCTGAGGCTCGAAAGCGTGG  
GGAGC

>ASV:5092:Genus:Alloprevotella

TACGGAAGGTTCCAGCGTTATCCGGATTTATTGGGTTAAAGGGAGCGCAGGCGGACCTTTAAGTCAGTGTGAAATACG  
GCGGCTCAACCCGCTGAACTGCAGTTGATACTGGAGGTCTTGAGTGCACACAGGGATACTGGAATTCATGGTGTAGCGGTG  
AAATGCTTAGATATCACGAAGAACTCCGATTGCGAAGGCAGCTTACTAACCTGTAACGACATTGATGCTCGAAAGTGTG  
GGTAT

>ASV:5093:Genus:Chryseobacterium

TACGGGGGATGCGAGCGTTATCCGGATTTATTGGGTTAAAGGGTCCGTAGGCGGATCTGTAAGTCAGTGGTAAATCTC  
ACAGCTTAACTGTGAAACTGCCATTGATACTGCAGGTCTTGAGTGTGTTGAAGTAGCTGGAATAAGTAGTGTAGCGGTG  
AAATGCATAGATATTACTTAGAACACCAATTGCGAAGGCAGTACTAAGCAACAACGACGCTGATGGACGAAAGCGTG  
GGGAG

>ASV:5094:Genus:Prevotella

TACGTATGGTGCAAGCGTTATCCGGATTTATTGGGTTAAAGGGAGCGTAGGCGGTTTGGTAAGCGTGTGTGAAATGTA  
GGAGCTCAACTTCTAGATTGCAGCGGAACTGTCAGACTTGAAGTGCACACAGTGGCGGAATTCATGGTGTAGCGGTG  
AAATGCTTAGATATCATGAAGAACTCCGATTGCGAAGGCAGCTTACGGGAGCGCAACTGACGCTGAAGCTCGAAGGTGCG  
GGTAT

>ASV:5095:Family:Lachnospiraceae

TACGTAGGGGGCAAGCGTTATCCGGATTTACTGGGTGTAAGGGAGCGTAGACGGCATGGCAAGTCTGAAGTAAAAGGCC  
GGGGCTCAACCCGGTACTGCATTGAAACTGCTGACTAGAGTGTCCGAGAGGTAAGTGGAAATTCAGTGTAGCGGTG  
AAATGCGTAGATATTGGGAGGAACACCAGTGGCGAAGGCGGCTACTGGGCTTAACTGACGCTGAGGCACGAAAGCATG  
GGTAG

>ASV:5096:Family:Lachnospiraceae

TACGTAGGGGGCTAGCGTTATCCGGATTTACTGGGCGTAAAGGGTGCCTAGGTGGCAGTGAAGTCAAGTGTGAAAGGCC  
GGGGCTCAACCCGGAGCTGCATTTGAAACTGCTCGGCTAGAGTACAGGAGAGGCAGGCGGAATTCCTAGTGTAGCGGTG  
AAATGCGTAGATATTAGGAGGAACACCAGCGGCGAAGGCGGCTACTGGACGTTAAGTGAAGTGTGAGGCTCGAAAGCGTG  
GGGAG

>ASV:5097:Genus:Bacteroides

TACGGAGGATCCGAGCGTTATCCGGATTTATTGGGTGTAAGGGAGCGTAGACGGCAGTGAAGTCTGAAGTAAAAGGCC  
GGGGCTTAACTGAACTGCTATTGAAACTGTTGGTCTTGAGTGAAGTGAAGTGGGCGGAATTCCTAGTGTAGCGGTG  
AAATGCTTAGATATCACGAAGAACTCCGATTGCGAAGGCAGCTACTAGACTGCAACTGACACTGATGCTCGAAAGTGTG  
GGTAT

>ASV:5098:Family:Lachnospiraceae

TACGGAGGATCCGAGCGTTATCCGGATTTACTGGGTGTAAGGGAGCGTAGACGGCATGGCAAGCCAGATGTGAAAGGCC  
GGGGCTCAACCCGGGACTGCATTTGAAACTGTCAGGCTAGAGTGTCCGAGAGGAAAGCGGAATTCCTAGTGTAGCGGTG  
AAATGCGTAGATATTAGGAGGAACACCAGTGGCGAAGGCGGCTACTGGGCTTAAATTGACGCTGAAGCACGAAAGCATG  
GGTAG

>ASV:5099:Order:Clostridiales

TACGTAGGGGGCGAGCGTTGTCCGGAATCACTGGGCGTAAAGGGCGCGTAGGCGGCTAGTAAGTCAAGTGTGAAAAGTG  
AGGGCTCAACCCCTAGAGTGCATCTGATACTGCTAGGCTTGAAGTACAGAAGAGGAAAGCGGAATTCCTAGTGTAGCGGTG  
AAATGCGTAGATATTGGGAGGAACACCAGTGGCGAAGGCGGCTTGTGGGCTTAACTGACGCTGAGGCTCGAAAGTGTG  
GGGAG

>ASV:5100:Family:Lachnospiraceae

TACGTAGGGGGCAAGCGTTATCCGGATTTACTGGGTGTAAGGGAGCGTAGACGGCATGGCAAGTCTGAAGTGAATACC  
CGGGCTCAACCCGGGACTGCATTTGAAACTGCTGAGCTAGAGTGTCCGAGAGGCAAGTGGAAATTCCTAGTGTAGCGGTG  
AAATGCGTAGATATTGGGAGGAACACCAGTGGCGAAGGCGGCAACTGGGCTTAACTGACGCTGAGGCTCGAAAGTGTG  
GGGAG

>ASV:5101:Family:Lachnospiraceae

TACGTAGGGGGCAAGCGTTATCCGGATTTACTGGGTGTAAGGGAGCGTAGACGGATTGCAAGTCTGATGTGAAAGGCA  
GGGGCTCAACTCCGGGACTGCTTTGAAACTGTTAACTAGAGTGTCCGAGAGGTAAGCGGAATTCCTAGTGTAGCGGTG  
AAATGCGTAGATATTGGGAGGAACACCAGTGGCGAAGGCGGCTACTGGGCTTAACTGACGCTGAGGCTCGAAAGTGTG  
GGTAG

>ASV:5102:Family:Ruminococcaceae

TACGTAGGTGGCAAGCGTTGTCCGGAATTAAGGGTGTAAAGGGAGCGTAGGCGGGAGTGAAGTCCGCTGTCTAAACTA  
TGGGCTCAACCCATAATCGCGGCCGAAACTGTACTTCTTGAGTGAAGTAGAGGTAAGCGGAATTCCTAGTGTAGCGGTG  
AATGCGTAAATATTAGGAGGAACACCAGTGGCGAAGGCGGCTACTGGGCTTAACTGACGCTGAGGCTCGAAAGCGTGG  
GTAGC

>ASV:5103:Genus:Lachnospiraceae\_UCG-008

TACGTAGGGGGCAAGCGTTATCCGGATTTACTGGGTGTAAGGGAGCGTAGGTGGTATGGCAAGTCAAGGTGAAAACCC



AGGGCTTAACCTTGGGATTGCCTTTGAAACTGTCAGACTAGAGTGCAGGAGGGGTAAGTGAATTCCTAGTGTAGCGGTG  
AAATGCTTAGATATTAGGAAGAACCCTCGATTGCGAAGGCAGCTTACTGGACTGTAACGTACGCTGATGCTCGAAAGTGTG  
GGTAT  
>ASV:5104:Family:Lachnospiraceae  
TACGTAGGAGGCAAGCGTTATCCGGATTTACTGGGTGTAAGGGAGCGTAGACGGTGTGGCAAGTCTGATGTGAAAGGCA  
TGGGCTCAACCTGTGGACTGCATTGAAACTGTCATACTTGGAGTGCAGGAGGGTAAGCGGAATTCCTAGTGTAGCGGTG  
AAATGCTTAGAGATCATACAGAACCCTCGATTGCGAAGGCAGCTTACCAAACCTATATCTGACGTTGAGGCACGAAAGCGTG  
GGGAG  
>ASV:5105:Family:Ruminococcaceae  
TACGTAGGTGGCAAGCGTTGTCCGGATTTACTGGGTGTAAGGGGCGGTAGGCGGGAGCGCAAGTCTGATGTGAAAACCTA  
TGGGCTTAACCATAGCTGCATTTGAAACTGTGTTTCTTGGAGTGTGGAGAGGCAAGTGAATTCCTAGTGTAGCGGTG  
AAATGCGTAGATATTAGGAGGAACACCAAGTGGCGAAGGCAGCTTGTCTGGACATTAACGTACGCTGAGGCAGGAAAGCGTG  
GGGAG  
>ASV:5106:Phylum:Firmicutes  
TACGTAGGGGCGAGCGTTGTCCGGATTTACTGGGCGTAAAGGGTGCCTAGGCGGCTGAAAAGTCCGATGTGAAAGACC  
CGTGCTTAACATGGGGTTCATCCGAAACTTTCGGGCTTGGAGTGCAGGAGAGGCAAGTGAATTCCTAGTGTAGCGGTG  
AAATGCGTAGATATCGGGAGGAACACCAAGTGGCGAAGGCAGCTTACTGGGCACCAACTGACGCTGAGGCTCGAAAGCATG  
GGTAG  
>ASV:5107:Family:Lachnospiraceae  
TACGGAGGGGCAAGCGTTATCCGGATTTACTGGGTGTAAGGGTGCAGGCGGTATGGCAAGTCTGAGTGTGAAAACCC  
AGGGCTTAACCTGGGACTGCTTTTGAACCTGTCAGACTGGAGTGCAGGAGAGGTAAGCGGAATTCCTAGTGTAGCGGTG  
AAATGCTTAGAGATCATACAGAACCCTCGATTGCGAAGGCAGCTTACCAAACCTATATCTGACGTTGAGGCACGAAAGCGTG  
GGGAG  
>ASV:5108:Genus:Bacteroides  
TACGGAGGATCCGAGCGTTATCCGGATTTATTGGGTTAAAGGGAGCGTAGGTGGACAGTAAAGTCAAGTGTGAAAAGTTT  
GCGGCTCAACCGTAAAATTGCAAGTGTACTGGCTGTCTTGGAGTACAGTAGAGGTAGGCGGAATTCCTGAAAGTACGCGGTG  
AAATGCGTAGATATCACTTGGAAACCCGATAGCGAAGGCAGCTTCCAGGCTCGATCTGACGCTGATGCGCGAGAGCGGTG  
GGTAG  
>ASV:5109:Family:Lachnospiraceae  
TACGTATGGTCAAGCGTTATCCGGATTTACTGGGTGTAAGGGAGCGCAGGCGGTGCGCAAGTCTGATGTGAAAGCCC  
GGGGCTCAACCCCGTACTGCATTGAAACTGTCGTAAGTGTGCGGAGGGGTAAGCGGAATTCCTAGTGTAGTGGTG  
AAATGCTTAGAGATCATACAGAACCCTCGATTGCGAAGGCAGCTTACCAAACCTATATCTGACGTTGAGGCACGAAAGCGTG  
GGGAG  
>ASV:5110:Species:coli  
TACGGAGGGTCAAGCGTTAATCCGGAATTTACTGGGCGTAAAGCGCACGCAGGCGGTTTGTAAAGTCAAGTGTGAAATCCC  
CGGGCTCAACCCGGAACTGCATCTGATACTGGCAAGCTTGGAGTCTCGTAGAGGGGGTGAATTCAGGTTAGCGGTG  
AAATGCGTAGAGATCTGGAGGAATACCGGTGGCGAAGGCAGCCCTTGACGAAGACTGACGCTCAGGTGCGAAAGCGTG  
GGGAG  
>ASV:5111:Genus:Asaccharospora  
TACGTAGGGGCTAGCGTTATCCGGATTTACTGGGCGTAAAGGGTGCCTAGGCGGTCTTTAAGTCAAGGAGTAAAAGGCT  
ACGGCTCAACCGTAGTAAGCTTTGAAACTGGAGGACTTGGAGTGCAGGAGAGGGGAGTGAATTCCTAGTGTAGCGGTG  
AATGCGTAGATATCGGGAGGAACACCAAGTGGCGAAGGCAGCTTACTGGGCACCAACTGACGCTGAGGCTCGAAAGCATG  
GTAGC  
>ASV:5112:Genus:Fusicatenibacter  
AACGTAGGTCAACAGCGTTGTCCGGATTTACTGGGTGTAAGGGAGCGTAGACGGCAAGGCAAGTCTGATGTGAAAACCC  
AGGGCTTAACCTGGGACTGCATTGAAACTGTCTGGCTCGAGTGCAGGAGAGGTAAGCGGAATTCCTAGTGTAGCGGTG  
AAATGCGTAGATATAGGAGGAACACCAAGTGGCGAAGGCAGCTGCGCTGGTCTGTAACGTGACACTGAGGCACGAAAGCGTG  
GGGAG  
>ASV:5113:Family:Clostridiaceae\_1  
TACGGAGGATCCGAGCGTTATCCGGATTTATTGGGTGTAAGGGTGCCTAGGTGGCAGTGAAGTCTGATGTGAAATACC  
CGGGCTCAACTGGGTGCTGCATTTCAAACCTGGAAGTCTAGAGTGCAGGAGAGGAGAATGGAATTCCTAGTGTAGCGGTG  
AAATGCGTAGAGATTAGGAAGAACCACCAAGTGGCGAAGGCAGCTTCTTGGACTGTAACGTGACGCTGAGGCTCGAAAGCATG  
GGTAG  
>ASV:5114:Family:Lachnospiraceae  
AACGTAGGGTCAAGCGTTGTCCGGATTTACTGGGTGTAAGGGAGCGTAGACGGAGTGGCAAGTCTGATGTGAAAACCC  
GGGGCTCAACCCGGGACTGCATTGAAACTGTCAATCTGGAGTACCGGAGAGGTAAGCGGAATTCCTAGTGTAGCGGTG  
AAATGCGTAGATATCGAGAGGAACACTCGTGGCGAAGGCAGGTTCTTGGACATTAACGTGACGCTGAGGCACGAAAGCCAG  
GGGAG  
>ASV:5115:Genus:Shuttleworthia  
TACGTATGGAGCAAGCGTTATCCGGATTTACTGGGTGTAAGGGAGTGTAGGCGGCACTATAAGTCTGATGTGAAAACCT  
AAGGCTTAACCATAGGATTGCATTGAAACTGTAGAGCTGGAGTATCGGAGAGGCAAGCGGAATTCCTGGTGTAGTGGTG  
AAATACGTAGATATCAGGAAGAACATCGTGGCGAAGGCAGGTTCTTGGACATAACTGACGCTAAGGCTCGAAAGCGTG  
GGAAG  
>ASV:5116:Family:Lachnospiraceae  
TACGTATGGTCAAGCGTTATCCGGATTTACTGGGTGTAAGGGAGCGCAGGCGGTGCGCAAGTCTGATGTGAAAACCC  
GGGGCTCAACCCGGGACTGCATTGAAACTGTCATCTGGAGTACCGGAGAGGTAAGCGGAATTCCTAGTGTAGCGGTG  
AAATGCGTAGATATTAGGAGGAACACCAAGTGGCGAAGGCAGTATGTCCGGAGTCAACTGACGCTGAGGCTCGAAAGTGTG  
GGTAT

>ASV:5117:Species:thermosphacta  
TACGTAGGTGGCAAGCGTTGTCCGGAATTATTGGGCGTAAAGCGCGCAGGCGGTCTCTTAAGTCTGATGTGAAAGCCC  
CCGGCTCAACCGGGAGGGTATTGAAACTGGGAGACTTAGAGACAGAAGAGGAGAGTGAATTCCAAGTGTAGCGGTG  
AAATGCGTAGATATTTGGAGGAACACCAGTGGCGAAGGCGGCTCTCTGGTCTGTTACTGACGCTGAGGCGCAAAGCGTG  
GGGAG

>ASV:5118:Genus:Ruminococcus\_2  
TACGTATGGAGCAAGCGTTGTCCGATTTACTGGGTGTAAAGGGTGCCTAGGCGGCTTTGCAAGTCAGATGTGAAATCTA  
TGGGCTCAACCCATAAACTGCATTGGAACTGTCGGACTAGAGTGTGAGTGAAGTAGAGGCGAGGCGGAATTCCTAGTGTAGCGGTG  
AAATGCGTAGAGATGGGAGGAACACCAGTGGCGAAGGCGGCTTACTGGACGGTAACTGACGCTGAGGCACGAAAGCATG  
GGTAG

>ASV:5119:Genus:Bacteroides  
TACGGAGGATCCGAGCGTTATCCGGATTTATTGGGTTAAAGGGAGCGTAGGTGGATTGTTAAGTCAGTTGTGAAAGCCC  
GGGGCTCAACCCCGGTACTGCATTGGAACTGTCGGACTAGAGTGTGCGAGGGTAAGTGAATTCCTAGTGTAGCGGTG  
AAATGCTTAGATATCACGAAGAACTCCGATTGCGAAGGCAGCTGCTAAGCTGCAACTGACATTGAGGCTCGAAAGGTG  
GGTAT

>ASV:5120:Genus:Blautia  
TACGTAGGGGGCAAGCGTTATCCGGATTTACTGGGTGTAAAGGGAGCGTAGACGGTGTGGCAAGTCTGATGTGAAAGGCT  
GGGGCTTAACCCCGGACTGCATTGGAACTGTTTCTTGGAGTGCAGGAGGTAAGCGGAATTCCTAGTGTAGCGGTG  
AAATGCGTAGATATATGAGGAACACCAGTGGCGAAGGCGGCTCTCTGGTCTGTAAGTACGCTGAGGCTCGAAAGCGTG  
GGGAG

>ASV:5121:Family:Lachnospiraceae  
TACGTAGGGGGCAAGCGTTATCCGGATTTACTGGGTGTAAAGGGAGCGTAGACGGTATTGCAAGTCTGAAGTGAATCCC  
GGGGCTCAACCCCGGACTGCATTGGAACTGTTAACTAGAGTGTGCGAGAGGTAAGCGGAATTCCTAGTGTAGCGGTG  
AAATGCGTAGATATTAGGAGGAACACCAGTGGCGAAGGCGGCTTACTGGACAGTCACTGACGTTGAGGCTCGAAAGCGTG  
GGGAG

>ASV:5122:Order:Bacteroidales  
TACGTATGGTGCAAGCGTTATCCGGATTTATTGGGTTAAAGGGAGCGTAGGTGGATTGTTAAGCCAGTTGTGAAAGTTT  
GCGGCTCAACCCCGGACTGCATTGGAACTGGCAGTCTTGGAGTACAGTAGAGGTGGGCGGAATTCCTGGTGTAGCGGTG  
AAATGCTTAGATATTAGGAAGAACACCAGTGGCGAAGGCGACTTCTGGACGAAACTGACGCTGAGGCGCAAAGCCAG  
GGGAG

>ASV:5123:Family:Lachnospiraceae  
TACGTAGGGGGCAAGCGTTATCCGGATTTACTGGGTGTAAAGGGAGCGTAGACGGTGTGGCAAGTCTGATGTGAAAGGCA  
TGGGCTCAACCTGGGAACTGCATTGAAACTGGCAGGCTAGAGTCTTGTAGAGGGGGTGAATTCAGGTGTAGCGGTG  
AAATGCGTAGAGATCTGAGGAACACCAGTGGCGAAGGCGGCTGCTGGACTGTTACTGACACTGAGGCACGAAAGCGTG  
GGGAG

>ASV:5124:Family:Lachnospiraceae  
TACGTATGGTGCAAGCGTTATCCGGATTTACTGGGTGTAAAGGGAGCGTAGGACGGATGGGCAAGTCTGATGTGAAAACCC  
GGGGCTCAACCCCGGACTGCATTGGAACTGTTTCTAGAGTGTGCGAGAGGTAAGTGAATTCCTAGTGTAGCGGTG  
AAATGCATAGATATTACTCAGAACACCAGTGGCGAAGGCATCTCACGAGGAGTTCATTGACGCTGAGGCACGAAAGCGTG  
GGGAT

>ASV:5125:Genus:Intestinimonas  
TACGTAGGTGGCAAGCGTTATCCGGATTTACTGGGTGTAAAGGGCGTGTAGGCGGGACTGCAAGTCAGGCGTGAAGACTG  
GGGGCTCAACCTCCAGCCTGCGTTTGGAACTGTAGTCTTGGAGTGTGAGAGGCAAGCGGAATTCCTGTGTAGCGGTG  
AAATGCGTAGATATACGGAGGAACACCAGTGGCGAAGGCGGCTTCTGGACATTAAGTACGCTGAGGCGCAAAGCGTG  
GGGAG

>ASV:5126:Genus:Anaerofustis  
TACGTAGGGGGCAAGCGTTGTCCGGATTTACTGGGCGTAAAGAGCTCGTAGGCGGTTATTTAAGTCAGGTGTGAAAGTTT  
TCGGCTCAACCGGAAAGTGCATTGAACTGGATGACTTGGAGTGTGCGAGAGGTAAGCGGAATTCCTAGTGTAGCGGTG  
AAATGCGTAGATATTAGGAGGAACACCAGTGGCGAAGGCGGCTTACTGGACGATAACTGACGCTGAGGCTCGAAAGCGTG  
GGGAG

>ASV:5127:Order:Clostridiales  
TACGTATGGTGCAAGCGTTATCCGGATTTACTGGGTGTAAAGGGTGCCTAGATGGATGTTAAGTCAGTTGTGAAAGTTT  
GCGGCTCAACCGTAAATTCAGTTGATACTGGATATCTTGGAGTGTGCGAGAGGTTGACGGAATTCCTAGTGTAGCGGTG  
AAATGCGTAGATATTAGGAGGAACACCAGTGGCGAAGGCGGCTCAACTGGACGATAACTGACGCTGAGGCGCAAAGCGTG  
GGGAG

>ASV:5128:Family:Ruminococcaceae  
AACGTAGGGTGCAAGCGTTGTCCGGAATTACTGGGTGTAAAGGGTGCCTAGGCGGGCAATCAAGTCAGACGTGAAATCTA  
TAGGCTTAACCATAGTCTGCGTTTGGAACTGAATGTCTTGGAGTGAAGTAGAGGTAAGCGGAATTCCTGGTGTAGCGGTG  
AAATGCGTAGAGATCGGGAGGAACACCAGTGGCGAAGGCGGCTTACTGGGCTTTACTGACGCTGAGGCACGAAAGCATG  
GGTAG

>ASV:5129:Genus:Erysipelatoclostridium  
TACGTAGGTGGCAAGCGTTATCCGGAATTATTGGGCGTAAAGAGGGAGCAGGCGGCAGCAAGGGTCTGTGGTGAAGCCT  
GAAGCTTAACCTCAGTAAGCCATAGAAACCAGGCAGCTAGAGTGCAGGAGAGGATCGTGAATTCATGTGTAGCGGTGA  
AATGCTTAGATATTAGGAGGAACACCAGTGGCGAAGGCGGCTTACTGGACGGTAACTGACGTTGAGGCTCGAAAGCGTG  
GGAGC

>ASV:5130:Genus:Peptococcus  
TACGTAGGGGGCGAGCGTTGTCCGGAATCACTGGGCGTAAAGGGCGCGTAGGCGGTTTGTAAAGTCAGATGTGAAAGTGT  
AGGGCTCAACCTTAGAGTGCATCTGATACTGGCAGACTTGGAGTACAGAAGAGGAAAGCGGAATTCCTAGTGTAGCGGTG

AAATGCGTAGATATTAGGAGGAACACCAGTGGCGAAGGCGGCTTTCTGGGCTGAAACTGACGCTGAGGCGCAAAGCGTG  
GGGAG  
>ASV:5131:Family:Ruminococcaceae  
TTCGTAGGTGGCAAGCGTTGTCCGGAATTACTGGGTGTAAGGGAGCGTAGGCGGGAAGCAAGTCAAGTGTCAAATCTA  
TCGGCTCAACTGATAGTCGCGCTTAAACTGTTTTCTTGTAGTGGAGTAGAGGCAGGCGGAATTCCTAGTGTAGCGGTGA  
AATGCGTAGATATTAGGAGGAACACCAGTGGCGAAGGCGGCTGCTGGGCTTTACTGACGCTGAGGCTCGAAAGCGTGG  
GTAGC  
>ASV:5132:Order:Bacteroidales  
TACGGAGGATCCGAGCGTTATCCGGATTTATTGGGTGTAAGGGAGCGCAGGCGGACCAGGCAAGTTGGAAGTAAAACCTA  
TGGGCTCAACCATAAATTGCTTTCAAACCTGCTGGCCTTGTAGTGCAGAGGTAGGTGGAATTCCTGGTGTAGCGGTG  
AAATGCATAGATATCACGCAGAACTCCGATTGCGAAGGCAGCTTACTAAACCATAACTGACACTGAAGCACGAGAGCGTG  
GGAT  
>ASV:5133:Order:Bacteroidales  
TACGGAGGATCCGAGCGTTATCCGGATTTATTGGGTTAAAGGGAGCGTAGGCGGACGCTTAAGTCAAGTGTGAAAGTTT  
GCGGCTCAACCGTAAAATTGCAGTTGATACTGGGTACCTTGTAGTGCAGCATAGGTAGGCGGAATTCGTGGTGTAGCGGTG  
AAATGCATAGACATTACTCAGAACACCGATTGCGAAGGCATCTCACGAGGAGTTCATTGACGCTGAGGCACGAAAGCGTG  
GGAT  
>ASV:5134:Order:Lactobacillales  
TACGTAGGTGGCAAGCGTTGTCCGGATTTATTGGGCTGTAAGCGAGCGCAGGCGGTTTCTTAAGTCTGATGTGAAAGCCC  
CCGGCTCAACCGGGGAGGGTCAATTGAAAACCTGGAAACTTGTAGTGCAGAAGAGGAGTGAATTCATGTGTAGCGGTG  
AAATGCGTAGATATCGGGAAGAACACCAATGGCGAAGGCAGGCTCTGGGCCGTTACTGACGCTGAGGAGCGAAAGCGTG  
GGAG  
>ASV:5135:Genus:Bacteroides  
TACGGAGGATCCGAGCGTTATCCGGATTTATTGGGTTAAAGGGAGCGCAGGCGGACCAGGCAAGTTGGAAGTAAAACCTA  
TGGGCTCAACCATAAATTGCTTTCAAACCTGTTTTCTTGTAGTGCAGCATAGGTAGGCGGAATTCGTGGTGTAGCGGTG  
AAATGCTTAGATATCACGAAGAACTCCGATTGCGAAGGCAGCTCACTGGACTGCAACTGACACTGATGCTCGAAAGTGTG  
GGTAT  
>ASV:5136:Genus:Bacteroides  
TACGGAGGATCCGAGCGTTATCCGGATTTATTGGGTTAAAGGGTGCCTAGGCGGCTTTTTAAGTCAAGGAGTAAAAGGCT  
ACGGCTCAACCGTAGTAAGCTTTGAAAACCTGGAGGACTTGTAGTGCAGTAGAGGTGGGCGGAATTCGTGGTGTAGCGGTGA  
AATGCTTAGATATCACGAAGAACTCCGATTGCGAAGGCAGCTCACTGGACTGCAACTGACACTGATGCTCGAAAGTGTGG  
GTATC  
>ASV:5137:Family:Ruminococcaceae  
TACGTAGGTGGCAAGCGTTGTCCGGAATTACTGGGTGTAAGGGAGCGTAGGCGGGATGCAAGTTGAATGTTAATCTA  
TCGGCTCAACTGATAGTCGCGTTCAAACCTGCAACTCTTGTAGTGAAGTAGAGGTAGGCGGAATTCCTAGTGTAGCGGTGA  
AATGCGTAGATATTAGGAGGAACACCAGTGGCGAAGGCGGCTTACTGGACGGTAACTGACGTTGAGGCTCGAAAGTGTGG  
GTATC  
>ASV:5138:Phylum:Bacteroidetes  
TACGTAGGGAGCAAGCGTTGTCCGGATTTACTGGATGTAAGGGTGCCTAGGCGGTTTGGTAAGTCAAGTGAATCCA  
TGGGCTTAACCCATGAACTGCTTTTGAACCTATCGAACTTGTAGTGAAGTAGAGGTAGGCGGAATTCGTGGTGTAGCGGTG  
AAATGCTTAGATATCACGAAGAACTCCGATTGCGAAGGCAGCTGCTAAGCTGCAACTGACATTGAGGCTCGAAAGTGTG  
AGTAT  
>ASV:5139:Genus:Akkermansia  
TACAGAGGTCTCAAGCGTTGTTCCGGAATCACTGGGCGTAAAGCGTGCCTAGGCTGTTTCGTAAGTCTGTGTGAAAGGCG  
CGGGCTCAACCCGTGGACGGACATGATACTGCGGACTAGAGTAATGGAGGGGGAACCGGAATTCCTCGGTGTAGCAGTG  
AAATGCTTAGAGATCATACAGAACACCGATTGCGAAGGCAGCTTACCAAATATATCTGACGTTGAGGCACGAAAGCGTG  
GGGAG  
>ASV:5140:Family:Bifidobacteriaceae  
TACGTAGGGTGCAGGCGTTATCCGGAATTATTGGGCGTAAAGGGCCGTTAGGCGGTTCTGCGCTCCGGTGTGAAAGTCC  
ATCGCTTAACCGTGGATCCGCGCCGGGTACGGGCGGCTTGTAGTGCCTGAGGGAGACTGGAATTCCTGGTGTAAACGGTG  
GAATGCTTAGATATCGAGAGGAACACTCGTGGCGAAGGCGGTTCTGGACATTAACGACGCTGAGGCACGAAAGCCAG  
GGGAG  
>ASV:5142:Family:Lachnospiraceae  
TACGGAGGATCCGAGCGTTATCCGGATTTACTGGGTGTAAGGGAGCGTAGACGGGACGCAAGTCTGGAGTAAAAGCCC  
GGGGCCAAACCCGGGACTGCTTTGAAAACCTGTGCTGCTGGAGTGCAGGAGAGGTAAGTGAATTCCTAGTGTAGCGGTG  
AAATGCTTAGAGATCATACAGAACACCGATTGCGAAGGCAGCTTACCAAATATATCTGACGTTGAGGCACGAAAGCGTG  
GGGAG  
>ASV:5143:Family:Ruminococcaceae  
TACGGAGGATCCGAGCGTTGTCCGGAATTACTGGGTGTAAGGGTGCCTAGGCGGACAGCAAGTCAAGTGTGAAATACA  
CGGGCTTAACCCGTGGGCTGCATTTGAAAACCTTGTAGTGAAGCAGAGGCAGGCGGAATTCCTAGTGTAGCGGTG  
AAATGCGTAGATATTAGGAAGAACACCAGTGGCGAAGGCGGCTTACTGGACGGTAACTGACGTTGAGGCTCGAAAGCGTG  
GGGAG  
>ASV:5144:Family:Lachnospiraceae  
TACGTAGGGGGCAAGCGTTATCCGGATTTACTGGGTGTAAGGGAGCGTAGACGGGAGCAAGTCTGATGTGAAAGGCA  
GGGGCTTAACCCCTGGACTGCATTTGAAAACCTTTAGCTGGAGTGCCTGGAGAGGTAAGCGGAATTCCTAGTGTAGCGGTG  
AAATGCGTAGATATTGAGGAAGAACACCAGTGGCGAAGGCGGCTTGTGGGCTTTAACTGACGCTGAGGCTCGAAAGTGTG  
GGGAG  
>ASV:5145:Genus:Kandleria

TACGTAGGGAGCGAGCGTTATCCGGATTCATTGGGTGTAAAGCGTGTAGGCGGTTTCTTAAGTCAGTAGTCTAAGCCT  
GGAGCTTAACTCCAGTTCGCTACTGAAACTGAGTTACTTGAGTATGGTAGAGGCAAGTGAATTCCATGTGTAGCGGTGA  
AATGCGTAGATATATGGAGGAACACCAGTGGCGAAGGCGACGGTCTGGGCCGCAACTGACGCTCATTCCGAAAGCGTGG  
GTAGC

>ASV:5146:Family:Ruminococcaceae

TACGTAGGGGGCGAGCGTTATCCGGATTTACTGGGTGTAAAGGGCGAGTAGGCGGGGAACCAAGTCAGATGTGAAATCTG  
GGGGCTTAACTCCAAACTGCATTTGAAACTGGTTTTCTTGAGTGATGGAGAGGCGAGCGGAATTCAGTGTAGCGGTG  
AATGCGTAGATATTGGGAAGAACCACAGTGGCGAAGGCGGCTGCTGGACATTAACGACGCTGAGGAGCGAAAGCGTG  
GGGAG

>ASV:5147:Family:Lachnospiraceae

TACGTAGGGGGCAAGCGTTATCCGGATTTACTGGGTGTAAAGGGAGCGTAGACGGTGTGGCAAGTCTGATGTGAAAGGCA  
TGGGCTCAACCCCGTACTGCATTGAAACTGTCGTAAGTGTGCGGAGGGTAAGCGGAATTCCTAGTGTAGCGGTG  
GAATGTGTAGATATCGGGAAGAACCACATGGCGAAGGCGAGTCTCTGGGCCGCTACTGACGCTGAGGAGCGAAAGCGTG  
GGGAG

>ASV:5148:Genus:Oscillibacter

TACGTAGGTGGCAAGCGTTGTCCGGATTTACTGGGTGTAAAGGGCGTGCAGCCGGGCGCAAGTCAGATGTGAAATCCG  
TGGGCTTAAACCACGAACTGCATTTGAAACTGCAGGTCTTGAGTACCGGAGAGGTTATCGGAATTCCTGTGTAGCGGTG  
AATGCGTAGATATCGGGAAGAACCACATGGCGAAGGCGAGTCTCTGGGCCGTTACTGACGCTGAGGAGCGAAAGCGTG  
GGGAG

>ASV:5149:Genus:hoa5-07d05\_gut\_group

TACGGAGGATGCGAGCGTTATCCGGATTTATTGGGTTAAAGGGTGCCTAGGTGGTGTAAAGTCAGCGGTGAAAGTTT  
GTGGCTCAACCATAAAATTGCCGTTGAAACTGGTATTCTTGAGTGAAGTAGAGGTTGGCGGAATTCAGTGTAGCGGTG  
AATGCGTAGATATTAGGAGGAACCACAGTGGCGAAGGCGGCTGCTGGACTGTTACTGACACTGAGGACGAAAGCGTG  
GGGAG

>ASV:5150:Family:Ruminococcaceae

TACGTAGGGAGCGAGCGTTGTCCGGATTTACTGGGTGTAAAGGGTGCCTAGGCGGCGAGCAAGTCAGGCGTGAAAGCCA  
TGGGCTTAAACCATGAAGTGCCTTAAACTGTTTTGCTTGAGTAGTGCAGAGGTAGGCGGAATTCAGGCTGTAGCGGTG  
GAATGCGTAGATATCGGGAAGAACCACAGTGGCGAAGGCGGCTTACTGGACGATAACTGACGCTGAGGCTCGAAAGCGTG  
GGGAG

>ASV:5151:Family:Christensenellaceae

TACGTAGGGAGCAAGCGTTGTCCGGAATTTACTGGGCGTAAAGGGTGCCTAGGCGGCTGTGTAAGTCATATGTGAAATACC  
CGGGCTTAAACCCTGGGGGTGCATGTGATACTGCATGGCTTGAGTACAGGAGAGGAAAGTGAATTCCTAGTGTAGCGGTG  
AATGCGTAGATATTAGGAGGAACCACAGTGGCGAAGGCGGCTTCTGACTGTAAGTACGCTGAGGCTCGAAAGCGTG  
GGGAG

>ASV:5152:Genus:Anaerofilum

TACGTATGGTGAAGCGTTATCCGGAATTTACTGGGCGTAAAGGGGAGCGAGGCGGAGCTGTAAGTTGGGCGTCAAATCTA  
CGGGCTTAAACCCTGATCCGCGCTCAAAGACTGGCTCTTGAGTAGTGCAGAGGTAGGTTGAATTCAGGCTGTAGCGGTG  
AATGCGTAGATATCGGGAAGAACCACAGTGGCGAAGGCGGCTTACTGGACCAACTGACGCTGAGGCTCGAAAGTATGG  
GTAGC

>ASV:5153:Genus:Christensenellaceae\_R-7\_group

TACGTAGGGGGCGAGCGTTGTCCGGAATGACTGGGCGTAAAGGGCGTGTAGGCGGCGGATTAAGTGTGGAGTGAAGTCC  
TGCTTTAAAGTGGGAATTGCTTTGCAGACTGGTTGGCTTGAGTGCAGAGGTAAGTGAATTCAGTGTAGCGGTG  
AATGCGTAGATATTAGGAGGAACCACAGTGGCGAAGGCGGCTTACTGGACGATAACTGACGCTGAGGCTCGAAAGCGTG  
GGGAG

>ASV:5154:Family:Lachnospiraceae

TACGGAGACTACGAGCGTTACTCGGATTCCTGGGCGTAAAGGGAGCGAGGCGGTGCGGCAAGTCTGATGTGAAAGGCG  
GGGGCTCAACCTGTGACTGCATTTGAAACTGTTAGTCTTGAGTGCCGGAGAGGTAAGCGGAATTCCTAGTGTAGCGGTG  
AATGCGTAGATATTAGGAGGAACCACAGTGGCGAAGGCGGCTTACTGGGCTTTACTGACGCTGAGGCTCGAAAGCGTG  
GGGAG

>ASV:5155:Order:Clostridiales

TACGGAGGATGCGAGCGTTATCCGGATTTATTGGGTTAAAGGGTGTGTAGGCGGGCTCGCAAGTTGGATGTGTAATACC  
CAGAGTTTAACTCGGGTGTGCATCTGAAACTACGAGTCTTGAGTGTGCGGAGAGGTAAGTGAATTCCTAGTGTAGCGGT  
GAAATGCGTAGATATTAGGAGGAACCACCGGTGGCGAAGGCGACTTTCTGGACAATAACTGACGTTGAGGACGAAAGTGT  
GGGGA

>ASV:5156:Genus:Blautia

TACGTAGGGGGCAAGCGTTATCCGGAATTTACTGGGTGTAAAGGGTGCCTAGGTGGTATGGCAAGTCTGAAGTGAAGGCA  
TGGGCTCAACCTGTGACTGCATTTGAAACTGCCGCTTGAGTGCCGGAGAGGTAAGCGGAATTCCTAGTGTAGCGGTG  
AATGCGTAGATATTAGGAGGAACCACAGTGGCGAAGGCGGCTTACTGGACGTAAGTACGCTTGGGCTCGAAAGCGTG  
GGGAG

>ASV:5157:Genus:Cloacibacillus

TACGTAGGGGGCGAGCGTTGTTCCGGAATTTACTGGGCGTAAAGGCGCACGAGGCGGACCTGTAAGTCTGTGCTCAAAGGCG  
GAGGCTCAACCTTCGTTCCACGATAGATACTGCGGCTTAGAGTATGTGAGAGGGAAGTGAATTCAGTGTAGCGGTG  
GAATGCGTAGATATCGGGAAGAACCACAGTGGCGAAGGCGGCTTACTGGACCAACTGACGCTGAGGCTCGAAAGTGTG  
GGTAG

>ASV:5158:Genus:Roseburia

TACGAAAGGGGGCGAGCGTTGTTCCGGAATTTACTGGGTGTAAAGGGAGCGAGGCGGTACGGCAAGTCTGGTGTGAAATCC  
GGGGCTCAACCCCGTACTGCATTGAAACTGTCGACTAGAGTGTGCGGAGGGTAAGTGAATTCCTAGTGTAGCGGTG  
AATGCGTAGATATTAGGAGGAACCACAGTGGCGAAGGCGGCTTACTGGACGTAAGTACGCTTGGGCTCGAAAGCGTG

GGGAG  
>ASV:5159:Genus:Asaccharospora  
TACGGAGGATCCGAGCGTTATCCGGATTTATTGGGTTTAAAGGGAGCGTAGATGGATGTTTAAAGTCAGTTGTGAAAAGTTT  
GCGGCTCAACCGTAGTAAGCTCTTGAAGCTGGAGGACTTGAAGTGCAGGAGAGAGAGAGTGAATTCTAGTGTAGCGGTGA  
AATGCGTAGATATTAGGAGGAACACCCAGTAGCGAAAGCGGCTCTCTGGACTGTAAGTACGCTGAGGCACGAAAGCGTGG  
GGAG  
>ASV:5160:Family:Ruminococcaceae  
TACGTAGGGGCAAGCGTTATCCGGATTTACTGGGTGTAAGGGTGCCTAGGCGGCTTTCGAAGTCAGATGTGAAATCTA  
TGGGCTCAACCCATAGCCTGCATTTGAAACTGCAGAGCTTGAATATCGGAGAGGAAAGCGGAATTCCTAGTGTAGCGGTG  
AAATGCGTAGATATTAGGAGGAACACCCAGTGGCGAAGGCGGCTTCTGGACGACAACGACGCTGAGGCGGAAAGTGTG  
GGGAG  
>ASV:5161:Genus:Holdemania  
TACGTAGGTGGCAAGCGTTATCCGGATTTACTGGGCTAAAGGGTGCAGGCGGTTTGTAAAGTTTAAAGTAAAAGCGT  
GGGGCTTAAACCCATATAGCCTTAGAAACTGACAGACTAGAGTACAGGAGAGGGCAATGGAATTCATGTGTAGCGGTAA  
AATGCGTAGATATCGGAGGAACACCCAGTGGCGAAGGCGACTACTGGGACCAACTGACGCTGAGGCTCGAAAGCATGG  
GTAGC  
>ASV:5162:Kingdom:Bacteria  
TACGTAGGTGGCAAGCGTTATCCGGATTTACTGGGTGTAAGGGGCGTGTAGGCGGAGATGCAAGTCAGATGTGAAATCCC  
CGGGCTTAAACCCGGAACTGCATTTGAAACTGTAGATCTTGAAGTGTGCGGAGGGCAATCGGAATTCCTAGTGTAGCGGTG  
AAATGCGTAGATATCGGGAAGAACACCAATGGCGAAGGCGAGTCTCTGGGCCGTTACTGACGCTGAGGAGCGAAAGCGTG  
GGGAG  
>ASV:5163:Order:Bacteroidales  
TACGGAGGATCCGAGCGTTATCCGGATTTACTGGGTGTAAGGGGCGGTAGGCGGGAATGCAAGTCAGATGTGAAATCCA  
AGGGCTCAACCCCTTGAAGTGCATTTGAAACTGTTGTTCTTGAAGTGTAGGTAAGCGGAATTCGTGGTGTAGCGGTG  
AAATGCTTAGATATCACGAAGAACTCCGATTGCGAAGGCGAGTCTACTAGACTGTTACTGACACTGATGCTCGAAAGTGTG  
GGTAT  
>ASV:5164:Genus:Bacteroides  
TACGTAGGGGCAAGCGTTATCCGGATTTACTGGGTGTAAGGGGAGCGAGGCGGACCGCAAGTTGGAAGTAAAAGTAA  
TGGGCTCAACCCATAAATTGCAGTTGATACTGGATATCTTGAAGTGCAGTTGAGGCGAGCGGAATTCGTGGTGTAGCGGTG  
AAATGCTTAGATATCACGAAGAACTCCGATTGCGAAGGCGAGTCTGCTAAGTGCACATGACATTGAGGCTCGAAAGTGTG  
GGTAT  
>ASV:5165:Family:Ruminococcaceae  
TACGTAGGTGGCAAGCGTTATCCGGATTTACTGGGTGTAAGGGGAGCGAGGCGGGATGCAAGTCAGCTGTGAAAAGTAA  
TGGGCTCAACCCATAAAGTGCATTTGAAACTGTAGAGCTTGAAGTGAAGTAGAGGCGAGCGGAATTCCTAGTGTAGCGGTG  
AAATGCGTAGAGATGGGAGGAATACCGTGGCGAAGGCGGCCCTGGACGAAGACTGACGCTCAGGTGCGAAAGCGTGG  
GGAG  
>ASV:5166:Family:Ruminococcaceae  
TACGTAGGGAGCGAGCGTTATCCGGATTTACTGGGTGTAAGGGGAGCGTAGGCGGGACAGCAAGTTGAATGTGAAAGGTA  
GGGGCTCAACCCCTACTGCGTTCAAAGTGTGTTCTTGAAGTGAAGTAGAGGCGAGCGGAATTCCTAGTGTAGCGGTG  
AAATGCGTAGATATTAGGAGGAACACCCAGTGGCGAAGGCGGCTGCTGGGCTTTAACTGACGCTGAAGCTCGAAAGCGTG  
GGGAG  
>ASV:5167:Species:gallinarum/inhibens/jeotgali/maltaromaticum/viridans  
TACGTAGGTGGCAAGCGTTATCCGGATTTACTGGGCTAAAGGGAGCGAGGCGGTTCTTTAAGTCTGATGTGAAAGCCC  
CCGGCTCAACCGGGGAGGGTCAATTGAAACTGGAGAAGTGAAGTGCAGAGAGGAGAGTGAATTCCACGTGTAGCGGTG  
AAATGCGTAGATATTGGAGGAACACCCAGTGGCGAAGGCGACTCTCTGGTCTGTAAGTACGCTGAGGCTCGAAAGCGTG  
GGGAG  
>ASV:5168:Class:Bacteroidia  
TACGGAGGATCCGAGCGTTATCCGGATTTACTGGGTTTAAAGGGTGCCTAGGCGGCACGCCAAGTCAGCGGTGAAATTTT  
CGGGCTCAACCCGACTGTGCGTTGATACTGGCGACTTGAAGTGAACAGAGGTAGGCGGAATTCCTAGTGTAGCGGTG  
AAATGCGTAGATATTAGGAGGAACACCCAGTGGCGAAGGCGGCTGCTGGGCTTTACTGACGCTGAGGCTCGAAAGCGTG  
GGGAG  
>ASV:5169:Genus:Ruminiclostridium\_5  
TACGTAGGGAGCAAGCGTTATCCGGATTTACTGGGTGTAAGGGTGCCTAGGCGGTTCCGCAAGTCAGAAGTGAATCCA  
TGGGCTTAAACCCATGAAGTGTCTTTGAAACTGTGAACTTGAAGTGAAGTAGAGGTAGGCGGAATTCCTAGTGTAGCGGTG  
AAATGCGTAGAGATCGGAGGAACACCCAGTGGCGAAGGCGGATTGCTGGACGACAACGACGCTGAGGCGGAAAGCGTG  
GGGAG  
>ASV:5170:Genus:Ruminiclostridium\_5  
TACGGAGGATCCGAGCGTTATCCGGATTTACTGGGTTTAAAGGGGAGCGTAGGCGGTTCCGCAAGTCAGAAGTGAATCCA  
TGGGCTTAAACCCATGAAGTGTCTTTGAAACTGTGAACTTGAAGTGAAGTAGAGGTAGGCGGAATTCCTAGTGTAGCGGTG  
AAATGCGTAGAGATCGGAGGAACACCCAGTGGCGAAGGCGGCTACTGGGCTTTAACTGACGCTGAGGCGGAAAGCATG  
GGTAG  
>ASV:5171:Genus:Granulicatella  
TACGTAGGTGGCAAGCGTTATCCGGATTTACTGGGCTAAAGCGAGCGAGGCGGTTCTTTAAGTCTGATGTGAAAGCCC  
CCGGCTCAACCGGGGAGGGTCAATTGAAACTGGGAACTTGAAGTGCAGAGAGGAGAGTGAATTCCATGTGTAGCGGTG  
AAATGCGTAGATATTAGGAGGAACACCCAGTGGCGAAGGCGGCTACTGGACGATAACTGACGCTGAGGCTCGAAAGCGTG  
GGGAG  
>ASV:5172:Genus:Alloprevotella  
TACGGAGGATCCGAGCGTTATCCGGATTTACTGGGTGTAAGGGGAGCGTAGGCGGCACGCCAAGCCAGATGTGAAAGCCC

GAGGCTTAACCTCGCGATTGCATTTGGAAGTGGCGAGCTAGAGTGCACACAGGGATGCTGGAATTCATGGTGTAGCGGT  
GAAATGCTCAGATATCATGAAGAACTCCGATCGCGAAGGCAGGTATCCGGGGTGAAGTGCAGCTGAGGCTCGAAAGTGC  
GGTA

>ASV:5173:Phylum:Firmicutes

TACGTAGGGGGCAAGCGTTATCCGGATTTACTGGGTGTAAGGGAGCGTAGACGGCACGGCAAGCCAGATGTGAAAGCCC  
GGGGCTCAACCCCGTATGGGGTCCGAACTGGTTTTCTTGAGTGCAGGAGAGGAAAGCGGAATTCAGTGTAGCGGTGA  
AATGCGTAGATATTGGGAAGAACACCAAGTGGCGAAGGCGGCTTTCTGGACTGTAAGTGCAGCTGAGGCTCGAAAGTGTG  
GTAGC

>ASV:5174:Genus:Butyricicoccus

TACGTAGGGAGCAAGCGTTATCCGGATTTACTGGGTGTAAGGGCGCGCAGGCGGGCCGGCAAGTTGGGAGTGAATCCG  
GGGGCTTAACCCCGAACTGCTTTCAAAGTCTGGTCTTGAGTGATGGAGAGGCAGGCGGAATTCAGTGTAGCGGTG  
AAATGCGTAGATATCGGGAGGAACACCAAGTGGCGAAGGCGACCTACTGGGCACCAACTGACGCTGAGGCTCGAAAGCATG  
GGTAG

>ASV:5175:Genus:Desulfovibrio

AACGTAGGGTGAAGCGTTAATCGGAATCACTGGGCGTAAAGCGCACGTAGGCTGTTATGTAAGTCAAGGGTGAAGCCC  
ACGGCTCAACCGTGGAACTGCCCTTGATACTGCACGACTCGAATCCGGGAGAGGGTGGCGGAATTCAGGTGTAGGAGTG  
AAATCCGTAGATATCGGGAGGAACACCAAGTGGCGAAGGCGACCTACTGGGCACCAACTGACGCTGAGGCTCGAAAGCATG  
GGTAG

>ASV:5176:Genus:Peptoniphilus

TACGTAGGGGCTAGCGTTGTCCGGAATCACTGGGCGTAAAGGGTTCGAGGCGGAATGCAAGTCAAGTGTAAAAGGCA  
GTAGCTTAACCTACTGTAAAGCATTTGAAAGTGCATATCTTGAGAAAGTAGAGGTAAGTGAATTTTTAGTGTAGCGGTGA  
AATGCGTAGATATTAAGAAATACCGGTGGCGAAGGCGGCTTACTGGACGGTAACTGACGTTGAGGCTCGAAAGCGTGG  
GGAGC

>ASV:5177:Family:Lachnospiraceae

TACGTATGGTGAAGCGTTATCCGGATTTACTGGGTGTAAGGGAGCGTAGACGGAAATGCAAGTCTGATGTGAAAGGCC  
GGGGCTCAACCCCGGACTGCATTGGAAGTGTCAATCTAGAGTACCGGAGGGGTAAGTGAATTCAGTGTAGCGGTG  
GAATGTGTAGATATCGGGAAGAACACCAATGGCGAAGGCGAGTCTCTGGGCCGCTACTGACGCTGAGGAGCGAAAGCGCG  
GGGAG

>ASV:5178:Kingdom:Bacteria

TACGTAGGGTGAAGCGTTATCCGGAATTTACTGGGCGTAAAGGGCTCGTAGGCGGTTCTGTCGCTCCGGTGCAGAAAGTCC  
ATCGCTTAACCGTGGATCCGCGCCGGGTACGGGCGGGCTAGAGTGTGTGAGGGGATCGTGAATTCATGTGTAGCGGTG  
AAATGCGTAGATATATGGAGGAACACCAAGTGGCGAAGGCGACGATCTGGCGCATAACTGACGCTCAGTCCGAAAGCGTG  
GGGAG

>ASV:5179:Genus:GCA-900066755

TACGTAGGGAGCAAGCGTTGCCCGGATTTACTGGGTGTAAGGGAGCGTAGACGGAGCAGCAAGTCTGATGTGAAAACCC  
GGGGCTCAACCCCGGACTGCATTGGAAGTGTGATCTGGAGTCCCGGAGAGGTAAGCGGAATTCAGGCTGTAGCGGTG  
GAATGCGTAGATATCGGGAGGAACACCAAGTGGCGAAGGCGGCTTACTGGGCTTAACTGACGCTGAAGCACGAAAGCATG  
GGTAG

>ASV:5180:Order:Clostridiales

TACGTAGGTGGCAAGCGTTGTCCGGAATTTACTGGGTGTAAGGGCGTGTAGGCGGAGCTGCAAGTCAAGTGTGAAATCTC  
CGGGCTTAACCCGGAAGTGCATTTGAAAGTGTAGCCCTTGAGTATCGGAGAGGCAAGCGGAATTCAGTGTAGCGGTG  
AAATGCTTAGATATACGGAAGAACTCCGATTGCGAAGGCGAGTCACTAGACTGTAAGTGCAGCTGATGCTCGAAAGTGTG  
GGTAT

>ASV:5181:Genus:Eggerthella

TACGTAGGGAGCGAGCGTTATCCGGATTTACTGGGCGTAAAGAGCGCGTAGGCGGCCTCTAAGCGGGATCTCTAATCCG  
AGGGCTCAACCCCGGCGGATCCCGAACTGGGAGGCTCGAGTTCGTTAGAGGCAAGCGGAATTCAGGCTGTAGCGGTG  
AATGCGCAGATATCGGGAAGAACACCAAGTGGCGAAGGCGAGCTGCTGGGCCGCAACTGACGCTGAGGCGCGAAAGCTAGG  
GGAGC

>ASV:5182:Family:Ruminococcaceae

TACGTATGGTGAAGCGTTATCCGAATTTACTGGGTGTAAGGGAGCGTAGACGGATGGGCAAGTCAAGTGTGAAAGCTG  
GGGGCTCAACCTCCAGCCTGCATTTGAAAGTGTAGTCTTGAGTGTGGAGAGGCAATCGGAATTCAGTGTAGCGGTG  
AAATGCGTAGATATACGGAAGAACACCAAGTGGCGAAGGCGAGCTTACTAACCTGTAAGTGCAGTGTGATGCTCGAAAGTGTG  
GGTAT

>ASV:5183:Species:scatoligenes

TACGTAGGGGGCGAGCGTTATCCGGATTTACTGGGCGTAAAGCGCTCGTAGGCGGCCTGCTAGGTCGGGAGTCAAATGCG  
GGGGCCAAACCCCGGCGCTCCGATACCGGCGGGCTTGAGTTGGTAGGGGAAGGCGGAATTCAGGCTGTAGCGGTG  
AATGCGCAGATATCGGGAAGAACACCGGTGGCGAAGGCGGCCTTCTGGGCCACAAGTGCAGCTGAGGAGCGAAAGTGTG  
GGAGC

>ASV:5184:Family:Ruminococcaceae

TACGGAGGATCCGAGCGTTATCCGGATTTACTGGGTTTAAAGGGAGCGTAGGCGGGATCGCAAGTCAAGTGTGAAAACCTA  
TGGGCTTAACCATAACTGCATTTGAAAGTGTAGAGCTTGAGTGAAGTGAAGGCAAGGCGGAATTCAGGCTGTAGCGGTG  
AAATGCGTAGAGATGGGAGGAACACCAAGTGGCGAAGGCGGCCTACTGGGCACCAACTGACGCTGAGGCTCGAAAGTGTG  
GGTAT

>ASV:5185:Family:Peptococcaceae

TACGTAGGGAGCGAGCGTTGTCCGGAATTTACTGGGCGTAAAGGGCGTGTAGGCGGGAATTTAAGTAAGGTGTGAAAACCTC  
CGGGCTTAACCTGGAGACTGCATTTAAAGTGGATTTCTTGAGGGCAGGAGAGGAAAGTGAATTCAGTGTAGCGGTG  
AAATGCGTAGATATTAGGAGGAACACCAAGTGGCGAAGGCGACTTTCTGGACAGTAACTGACGTTGAGGCGCGAAAGTGTG  
GGGAG

>ASV:5186:Family:Ruminococcaceae  
AACGTAGGTCACAAGCGTTGTTCCGGAATTACTGGGTGTAAGGGAGCGTAGGCGGGATGGCAAGTAGAATGTTAAATCCA  
TCGGCTCAACCCGGTGGCTGCGTTCTAAACTGCCGTTCTTGAGTGAAGTAGAGGTAAGCGGAATTCCTGGTGTAGCGGTGA  
AATGCGTAGATATCAGGAGGAACATCGGTGGCGAAGGCGGCTTACTGGCCCTTACTGACGCTGAGGCTCGAAAGCGTGG  
GGAGC

>ASV:5187:Family:Ruminococcaceae  
TACGTAGGTGGCAAGCGTTGTCCGGAATTACTGGGTGTAAGGGCGTGTAGGCGGGAAGACAGGTCAGATGTGAAATGTC  
GGGGCTCAACCCGGAAGTGCATTGAAACCGTTTCTTGAGTATCGGAGAGGCAAGCGGAATTCCTAGTGTAGCGGTG  
AAATGCGTAGATATTGGGAGGAACACCACTGCGAAGGCGGCTTACTGGACGATGACTGACGTTGAGGCTCGAAAGCGTG  
GGGAG

>ASV:5188:Genus:Erysipelatoclostridium  
TACGTAGGTGGCAAGCGTTATCCGGAATTATTGGGCGTAAAGGGAGCAGGCGGCAATAAAGGCTGTGGTGAAGACT  
GAAGCTCAACTTCAGTAAGCCATGGAAACAGATAGCTAGAGAGCAGAAGAGGATCGCGGAATTCATGTGTAGCGGTGA  
AATGTGTAGATATGGAGGAACACCACTGCGAAGGCGGCTGCTGGTCTGACGCTGACGCTCAGTCCCGAAAGCGTGG  
GGAGC

>ASV:5189:Species:georgiae/hongkongensis  
TACGTAGGGCGCAGCGTTGTCCGGAATTATTGGGCGTAAAGGGCTGTAGGCGGCTGGTCCGCTCTGCCGTGAAATCCT  
CTGGCTCAACCCGATAGCCTGCATTGAAACTGTTTTCTTGAGTGTGGAGAGGCAATCGGAATTCCTGGTGTAGCGGTG  
GAATGCGCAGATATCAGGAAGAACACCGGTGGCGAAGGCGGCTCTCTGGCCGTTACTGACGCTGAGGAGCGAAAGCGTG  
GGGAG

>ASV:5190:Genus:Intestinimonas  
TACGTAGGGGGCAAGCGTTATCCGGAATTACTGGGTGTAAGGGCGTGTAGGCGGGAAGCAAGTCAGATGTGAAAACCTA  
TGGGCTCAACCCATAGCCTGCATTGAAACTGTTTTCTTGAGTGTGGAGAGGCAATCGGAATTCCTGGTGTAGCGGTG  
AAATGCGTAGATATCAGGAAGAACACCGATTGCGAAGGCGGCTCACTAGACTGTACTGACACTGATGCTCGAAAGTGTG  
GGTAT

>ASV:5191:Genus:Holdemania  
TACGGAGGATCCGAGCGTTATCCGGAATTATTGGGCGTAAAGGGTGCAGGCGGTTTTGTTAAGTTAAGTGAAGCGTG  
GGGGCTTAACCCATAGCCTGCATTTGAAACTGACAGACTAGAGTACAGGAGAGGCAATGGAATTCATGTGTAGCGGTAA  
AATGCTTAGATATCAGGAAGAACACCGATTGCGAAGGCGGCTCACTAGACTGTTACTGACACTGATGCTCGAAAGTGTG  
GTATC

>ASV:5192:Family:Ruminococcaceae  
TACGTAGGGAGCGAGCGTTGTCCGGAATTACTGGGTGTAAGGGAGCGTAGGCGGGAAGCAAGTTGGAAGTGAATGCA  
TGGGCTTAACCCATAGCCTGCATTTCAAACCTGTTTTCTTGAGTGAAGTAGAGGCAAGCGGGAATTCCTAGTGTAGCGGTG  
AAATGCGTAGATATTAGGAGGAACACCACTGCGAAGGCGGCTGCTGGGCTATAACTGACGCTGAGGCTCGAAAGCGTG  
GGTAG

>ASV:5193:Order:Clostridiales  
TACGTAGGGGGCAAGCGTTATCCGGAATTATTGGGCGTAAAGAGTACGTAGGTGGTTTTCTAAGCACGGGGTTAAGGCA  
ATGGCTTAACCATTTGTCGCTTGTGAACTGGAAGACTTGTAGTGCAGGAGAGGAAAGCGGAATTCCTGGTGTAGCGGTGA  
AATGCTTAGATATCAGGAAGAACACCGATTGCGAAGGCGGCTGCTAAGCTGCAACTGACATTGAGGCTCGAAAGTGTG  
GTATC

>ASV:5194:Family:Acidaminococcaceae  
TACGTAGGTGGCGAGCGTTGTCCGGAATTATTGGGCGTAAAGAGCATGTAGGCGGCTATTAAGTCGAGCGTGAATGCG  
GGGGCTCAACCCGATGCGCTGGAAGTGGTAGGCTTGTAGTGCAGGAGAGGAAAGGGGAATTCACGCTGTAGCAGTGA  
AATGCGTAGATATGGAAGAACACCGATGGCGAAGGCGGCTCCTGGGACATAACTGACGCTCAGGACCGAAAGCGTGG  
GGATC

>ASV:5195:Genus:Oscillibacter  
TACGTAGGGAGCGAGCGTTGTCCGGAATTACTGGGTGTAAGGGCGTGCAGCCGGGCTGGTAAGTCAGATGTGAAATCCG  
TGGGCTTAACCCACGAAGTGCATTTGAAACTGCTGGTCTTGAGTACCGGAGAGGTTATCGGAATTCCTGTGTAGCGGTG  
AAATGCGTAGATATTAGGAGGAACATCAGTGGCGAAGGCGGCTTACTGGGCTTAACTGACGCTGAGGCTCGAAAGCGTG  
GGGAG

>ASV:5196:Species:coxii  
TACGTAGGGGGCGAGCGTTGTCCGGAATTACTGGGCGTAAAGGGTTCGAGGCGCATGACAAGTCCGATGTAAAAGGCG  
AAAGCTCAACTTTCGTAAGCATCGGAAGTGTCAAGCTTGTAGTGAAGGAGAGGCAAGTGAATTCCTAGTGTAGCGGTGG  
AATGCGTAGATATTAGGAGGAATACCGGTGGCGAAGGCGACTTGTGACTTCAACTGACGCTGAGGAACGAAAGCGTGG  
GTAGC

>ASV:5197:Genus:Paucibacter  
TACGTAGGGTGAAGCGTTAATCGGAATTACTGGGCGTAAAGCGTGCAGGCGGTTATGCAAGACAGAGGTGAAATCCC  
CGGGCTCAACCTGGGAAGTGCATTTGTGACTGCATGGCTAGAGTACGGTAGAGGGGGATGGAATTCGCGTGTAGCAGTG  
AAATGCGTAGATATGCGGAGGAACACCGATGGCGAAGGCAATCCCCTGGACCTGACTGACGCTCATGCACGAAAGCGTG  
GGGAG

>ASV:5198:Family:Lachnospiraceae  
TACGTAGGGGGCAAGCGTTATCCGGAATTACTGGGTGTAAGGGAGCGTAGACGGCACGGCAAGCCAGATGTGAAAGCCC  
GGGGCTCAACCCGGGACTGCATTTGAAACTGCTGAGCTAGAGTGTGGAGAGGCAAGTGAATTCCTAGTGTAGCGGTG  
AAATGCTTAGATATCAGGAAGAACACCGATTGCGAAGGCGGCTGCTAAGCTGCAACTGACACTGAGGCTCGAAAGTGTG  
GGTAG

>ASV:5199:Family:Acidaminococcaceae  
TACGTAGGGGGCAAGCGTTATCCGGAATTACTGGGTGTAAGGGAGCGTAGACGGTGTGGAAGTGTGAAAGGCA  
TGGGCTCAACCCGATGCGCTGGAAGTGTAGGCTTGTAGTGCAGGAGAGGAAAGGGGAATTCCTAGTGTAGCGGTGA

AATGCGTAGATATTGGGAGGAACACCAAGTGGCGAAGGCGCCTTTCTGGACTGTGTCTGACGCTGAGATGCGAAAGCCAGG  
GTAGC  
>ASV:5200:Genus:Massilia  
TACGTAGGGTGCAAGCGTTAATCGGAATTACTGGGCGTAAAGCGTGCAGGCGGTTTTTTAAGTCTGTCTGAAAGCCC  
CGGGCTTAACCTGGGAATTGCGATGGAGACTGCAAGGCTTGAATCTGGCAGAGGGGGTAGAATCCACGTGTAGCAGTG  
AAATGCGTAGAGATGTGGAGGAACACCCAGTGGCGAAGGCGAGCCCTGGGTCAAGATTGACGCTCATGCACGAAAGCGTG  
GGGAG  
>ASV:5201:Family:Lachnospiraceae  
AACGTAGGTCACAAGCGTTGTCCGGAATTACTGGGTGTAAGGGAGCGCAGGCGGGGAGAACAAGTTGGAAGTAAAAGCCC  
GGGGCTCAACCCGGGACTGCTTTTAAAAGTGCAGGGCTAGAGTGCAGGAGGGGCAAGTGAATTCCTAGTGTAGCGGTG  
AAATGCGTAGATATTAGGAGGAACACCAAGTGGCGAAGGCGACTTTCTGGACAGTAACGACGTTGAGGCACGAAAGTGTG  
GGGAG  
>ASV:5202:Family:Lachnospiraceae  
TACGTAGGGGGCAAGCGTTATCCGGATTTACTGGGTGTAAGGGAGCGCAGGCGGGCAGTAAGTCAGAAGTAAAAGCCC  
GGGGCTTAACCTCGGGACTGCTTTTAAAAGTGCAGGGCTAGAGTGCAGGAGGGGCAAGTGAATTCCTAGTGTAGCGGTG  
AAATGCGTAGATATTAGGAGGAACACCAAGTGGCGAAGGCGGCTACTGGGCTGTAACGACGCTGAGGCTCGAAAGCGTG  
GGTAG  
>ASV:5203:Family:Lachnospiraceae  
AACGTAGGTCACAAGCGTTGTCCGGAATTACTGGGTGTAAGGGAGCGCAGGCGGGAAGACAAGTTGGAAGTAAAATCTA  
TGGGCTCAACCCATAAACTGCTTTTAAAAGTGCAGGCTAGAGTGTGGAGGGGTAAGCGGAATTCCTAGTGTAGCGGTG  
AAATGCGTAGATATTAGGAGGAACACCCAGTGGCGAAGGCGGCTACTGGACGACCACTGACGCTGAGGCTCGAAAGCGTG  
GGGG  
>ASV:5204:Phylum:Firmicutes  
TACGGAGGATCCGAGCGTTATCCGGATTTATTGGGTTAAAGGGAGCGTAGATGGGTGTTAAGTCAGTTGTGAAAGTTT  
GCGGCTCAACCGTAAAATTGCAAGTGTACTGGATATCTTGAAGTGCAGAAGAGGGCGATGGAATTCATGTGTAGCGGTG  
AAATGCGTAGATATTAGGAGGAACACCAAGTGGCGAAGGCGGCTGCCTGGTCTGTAACGACACTGATGCACGAAAGCGTG  
GGGAG  
>ASV:5205:Genus:Erysipelatoclostridium  
TACGTAGGTGGCAAGCGTTATCCGGAATTATTGGGCGTAAAGGGAGCGCAGGCGGGCAGAGGCTGTGGTAAAAGACT  
GAAGCTTAACCTCAGTAAGCCATAGAAAACCGGCTGCTAGAGTGCAGGAGAGGATCGTGAATTCATGTGTAGCGGTG  
AATGCTTAGATATCACGAAGAACTCCGATTGCGAAGGCGGCTGCTAAGCTGCAACTGACATTGAGGCTCGAAAGTGTGG  
GTATC  
>ASV:5206:Genus:Fusicatenibacter  
TACGTAGGGGGCAAGCGTTATCCGGATTTACTGGGTGTAAGGGAGCGTAGACGGCAAGGCAAGTCTGATGTGAAAACCC  
AGGGCTTAACCTGGGACTGCATTGAAAAGTGTCTGGCTCGAGTGCAGGAGGGTAAGCGGAATTCCTAGTGTAGCGGTG  
AAATGCGTAGATATTAGGAGGAACACCAAGTGGCGAAGGCGGCTACTGGACGGTAACGACGTTGAGGCTCGAAAGCGTG  
GGAAG  
>ASV:5207:Family:Peptostreptococcaceae  
TACGTAGGGGGCTAGCGTTATCCGGATTTACTGGGCGTAAAGGGTGCCTAGGCGGCTTTTAAAGTCAGGAGTAAAAGGCT  
ACGGCTCAACCGTAGTAAGCCTTTGAAAAGTGGGAACTTGAAGTGCAGGAGAGGAGAGTGAATTCCTAGTGTAGCGGTG  
AATGCGTAGATATCGGGAGGAACACCAAGTGGCGAAGGCGGCTACTGGGACCAACTGACGCTGAGGCTCGAAAGTGTGG  
GTAGC  
>ASV:5208:Genus:Hydrogenoanaerobacterium  
TACGTAGGGAGCAAGCGTTGTCCGGAATTACTGGGTGTAAGGGAGCGTAGGCGGGAATGCAAGTTGAATGTCAAATCTA  
CCGGCTTAACCTGGTAGCCGCTTCAAAGTGCCTTTCTTGAAGTAGAGGACAGGCGGAATTCCTAGTGTAGCGGTG  
AATGCGTAGATATTAGGAGGAACACCAAGTGGCGAAGGCGGCTGCTGGGCTTTACTGACGCTGAGGCACGAAAGCGTGG  
GTAGC  
>ASV:5209:Genus:Alistipes  
TACGGAGGATTCAAGCGTTATCCGGATTTATTGGGTTAAAGGGTGCCTAGGCGGTTTGATAAGTTAGAGGTAAAAGCTC  
GATGCTCAACATCGAAATTGCCTCTGATACTGTCAGACTAGAGTGTAGTTGCGGAAGGCGGAATGTGTGGTGTAGCGGTG  
AAATGCTTAGATATCACAAAAACACCGATTGCGAAGGCGAGCTTCCAAGCTATTACTGACGCTGAGGCACGAAAGCGTG  
GGTAG  
>ASV:5210:Genus:Butyricimonas  
TACGTAGGGAGCGAGCGTTGTCCGGAATTACTGGGTGTAAGGGTGCCTAGGCGGCTGCAAGTCAGAAGTAAAATCCA  
CGGGCTTAACCCATGAAGTGTCTTTTAAAAGTGTAGAGCTTGAAGCAGACGAGGGAGGCGGAACAAGTGAAGTAGCGGTG  
AAATGCGTAGATATCACTTGGAAACCCGATAGCGAAGGCGAGCTTCCAGGCTCGTTCTGACGCTGATGCGCGAGAGCGTG  
GGTAG  
>ASV:5211:Family:Peptostreptococcaceae  
TACGTAGGTCAGGCGTTGTCCGGATTTATTGGGCGTAAAGCGAGCGCAGGCGGCTTTTAAAGTCAGGAGTAAAAGGCT  
ACGGCTCAACCGTAGTAAGCTCTTAAAAGTGGAGACTTGAAGTGCAGGAGAGGAGAGTGAATTCCTAGTGTAGCGGTG  
AATGCGTAGATATTAGGAGGAACACCAAGTGGCGAAGGCGGCTGTCTGGTCTGTAACGACGCTGAGGCTCGAAAGCGTGG  
GGAGC  
>ASV:5212:Family:Ruminococcaceae  
TACGGAGGGAGCAAGCGTTGTCCGGATTTACTGGGTGTAAGGGTGCCTAGGCGGCTTTGCAAGTCAGATGTGAAATCTA  
TGGGCTCAACCCATAAACTGCAATTTAAAAGTGTATTTCTTGAAGTACTGGAGAGGCAATCGGAATTCCTAGTATAGCGGTG  
AAATGCGTAGATATTGAGGAGGAACACCCAGTGGCGAAGGCGGCAACTGGGCTTTAACTGACGCTGAGGCTCGAAAGTGTG  
GGGAG  
>ASV:5213:Family:Lachnospiraceae



TACGGAGGATCAAGCGTTATCCGGATTTATTGGGTTAAAGGGTGCCTAGGCGGTTTGATAAGTTAGAGGTGAAAGCCC  
GGGGCTCAACCCCGTACTGCATTGAAACTGTCGTAAGTGTGCGGAGGGTAAGCGGAATTCCTAGTGTAGCGGTG  
TAATGCGTAGATATTAGGAGGAACACCAGTGGCGAAGGCGGCTTCTGGCTTTAACTGACGCTGAGGCTCGAAAGCGTG  
GGGAG

>ASV:5214:Genus:Gemella

TACGTAGGTGGCAAGCGTTGTCCGGAATTATTGGGCGTAAAGCGCGCAGGTGGTTTAATAAGTCTGATGTGAAAGCCC  
ACGGCTCAACCGTGGAGGTCATTGAAACTGTTAACTTGAAGTGCAGGAGGAAAGTGAATTCCTAGTGTAGCGGTG  
AAATGCGTAGAGATTAGGAGGAACACCAGTGGCGAAGGCGGCTTTTGGCTGTAACGACACTGAGGCGCGAAAGCGTG  
GGGAG

>ASV:5215:Genus:Anthococcus

TACGTAGGATCCGAGCGTTATCCGGATTTATTGGGCGTAAAGCGAGCGCAGGTGGTTTATAAGTCTGGTGTAAAAGGCA  
GTGGCTCAACCATTTGATGCATTGAAACTGGTAGACTTGAAGTGCAGGAGAGAGAGTGAATTCATGTGTAGCGGTG  
AAATGCGTAGATATATGGAGGAACACCAGTGGCGAAGGCGGCTTCTGGACGACAACTGACGCTGAGGCGCGAAAGCCAG  
GGAGC

>ASV:5216:Genus:Bacteroides

TACGTAGGGGGCAAGCGTTATCCGGATTTACTGGGTGTAAGGGAGCGTAGACGGTTTGATAAGTTAGAGGTGGAATCCC  
GGGGCTTAACTCCGGAAGTCCCTAATACTGTCAGTCTTGAAGTACAGTAGAGGTGGGCGGAATTCGTGGTGTAGCGGTG  
AAATGCTTAGATATCACGAAGAACTCCGATTGCGAAGGCAGCTCACTGGACTGCAACTGACACTGATGCTCGAAAGTGTG  
GGTAT

>ASV:5217:Family:Lachnospiraceae

TACGTAGGGGGCAAGCGTTATCCGGATTTACTGGGTGTAAGGGAGCGTAGGCGGCTTGTAAGTGCAGAAGTAAAAGCCC  
AGGGCTTAACTCTGGGACTGCTTTTGAAGTCCAGGCTTGAATGCGGAGAGGTAAAGTGAATTCCTAGTGTAGCGGTG  
AAATGCGTAGATATTAGGAGGAACACCAGTGGCGAAGGCGGCTTACTGGACGGTCAATGACGCTGAGGCTCGAAAGCGTG  
GGGAG

>ASV:5218:Genus:Christensenellaceae\_R-7\_group

TACGTAGGGGGCGAGCGTTGTCCGGAATGACTGGGCGTAAAGGGCGTGTAGGCGGCTTTTTAAGTCTGGAGTAAAAGCCC  
CTTTTTCAAGGAGGGAGTGTCTTGGAGACTGGGAGCTTGAAGTGCAGGAGAGGTAAAGTGAATTCAGTGTAGCGGTG  
AAATGCGTAGAGATTGGGAGGAACACCAGTGGCGAAGGCGGCTTCTGGACGATGACTGACGTTGAGGCTCGAAAGCGTG  
GGGAG

>ASV:5219:Family:Ruminococcaceae

TACGGAGGATCAAGCGTTATCCGGATTTATTGGGTTAAAGGGTGCCTAGGCGGTTTGATAAGTTAGAGGTGAAATACC  
GGGGCTCAACTCCGGGCTGCGCTTGAAGTCTTCTTGAAGTGCAGACTAGAGGAGGCGGGAATTCCTAGTGTAGCGGTG  
GAATGCGTAGATATTAGGAGGAACACCAGTGGCGAAGGCGGCTTCTGGGCTTTAACTGACGCTGAGGCACGAAAGCGTA  
GGTAG

>ASV:5220:Family:Rikenellaceae

TACGGAGGATTCGAGCGTTATCCGGATTTATTGGGTTAAAGGGAGCGTAGATGGATGTTAAGTCAAGTGTGAAAGTTT  
GCGGCTTAAACCTTGAATTCGCTTGAAGTGTGACTGACTAGAGTATAGTTGCGGAAGGCGGAATGTGTGGTGTAGCGGTG  
AAATGCTTAGATATCACAGAACACCAGATTGCGAAGGCAGCTTCCAAAGCTATTACTGACGCTGAGGCACGAAAGCGTG  
GGTAG

>ASV:5221:Kingdom:Bacteria

TACGTAGGTGGCGAGCGTTATCCGGATTTACTGGGTGTAAGGGCGCGTAGGCGGGAATGCAAGTCAAGTGTGAAATCCA  
GGGGCTTAAACCTTGAATTCGCTTGAAGTGTGACTGACTAGAGTATAGTTGCGGAAGGCGGAATTCCTAGTGTAGCGGTG  
AAATGCTTAGATATCACGAAGAACTCCGATTGCGAAGGCAGCTCACTGGAGTGAAGTCAAGTGTGACTGACTGACTGACTG  
GGTAT

>ASV:5222:Genus:Family\_XIII\_AD3011\_group

TACGTAGGGGGCAAGCGTTATCCGGAATTATTGGGCGTAAAGAGTACGTAGGTGGTTACCTAAGCACGAGGTATAAGGCA  
ATGGCTTAAACCTTGAATTCGCTTGAAGTGTGACTGACTAGAGTATAGTTGCGGAAGGCGGAATTCCTAGTGTAGCGGTG  
AAATGCGTAGATATTAGGAGGAACACCAGTGGCGAAGGAGGCTTCTGGACTGTAAGTCAAGTGTGACTGACTGACTGACTG  
GGAGC

>ASV:5223:Genus:Bacteroides

TACGGAGGATGCGAGCGTTATCCGGATTTATTGGGTTAAAGGGAGCGCAGACGGGTTTTAAGTCAAGTGTGAAAGTTT  
GCGGCTCAACCTTAAATTCGAGTTGATACTGGAGACCTTGAAGTGCAGTTGAGGCGAGGCGGAATTCGTGGTGTAGCGGTG  
AAATGCTTAGATATCACGAAGAACTCCGATTGCGAAGGCAGCTTCTAAAGTGAAGTCAAGTGTGACTGACTGACTGACTG  
GGTAT

>ASV:5224:Order:Bacteroidales

TACGTAGGGAGCGAGCGTTGTCCGGAATTACTGGGTGTAAGGGTGCCTAGGCGGGATGGCAAGTCAAGTGTGAAATACC  
GGGGCTCAACTCCGAGCTGCATTTGAAACTGTCGTTCTTGAAGTGTAGTTGCGGAAGGCGGAATGTGTGGTGTAGCGGTG  
AAATGCTTAGATATCACAGAACACCAGATTGCGAAGGCAGCTTCCAAAGCTATTACTGACGCTGAGGCACGAAAGCGTG  
GGGAG

>ASV:5225:Order:Rhodospirillales

TACGTAGGGAGCGAGCGTTGTCCGGAATTACTGGGTGTAAGGGTGTGTAGGCGGTTATGTAAGATAGCGGTGAAATGCC  
GGGGCTCAACCTCGGAATTGCTTTATGACTATATACTAGAATAATGGAGAGGATATCGGAATACCCAGTGTAGAGGTG  
AAATGCTTAGATATTGGGTAGAACACCAGTGGCGAAGGCGGCTTCTGGCATTATTGACGCTGAGGCACGAAAGCATG  
GGGAT

>ASV:5226:Genus:Ruminococcaceae\_NK4A214\_group

TACGTAGGTGGCAAGCGTTATCCGGATTTACTGGGTGTAAGGGCGCGTAGGCGGGGATGCAAGTCAAGTGTGAAATCTA  
TGGGCTTAACTCATAAACTGCATTTGAAACTGTATCTCTTGAAGTGTGAGAGGTAGATGGAATTCCTTGTGTAGCGGTG  
AAATGCGTAGATATAAGGAAGAAACACCAGTGGCGAAGGCGATCTACTGGACAGTAACTGACGCTGAGGCGCGAGAGCGTG

GGGAG

>ASV:5227:Family:Rikenellaceae

TACGTATGGTGCAAGCGTTATCCGGATTACTGGGTTTAAAGGGTGCCTAGGCTGTTTTTAAAGTTAGAGGTGAAAGCTC  
GACGCTCAACGTCGAAATTGCCTCTGATACTGAGAGACTAGAGTGTAGTTGCGGAAGCGGAATGTGTGGTGTAGCGGTG  
AAATGCTTAGATATCACACAGAACCAGTTCGGAAGGCAGCTTCTGGACTGTAACGACGCTGATGCTCGAAAGTGTG  
GGTAT

>ASV:5228:Family:Ruminococcaceae

TACGTAGGGAGCAAGCGTTATCCGGATTACTGGGTTTAAAGGGTGCCTAGACGGGAAGACAAGTTGGAAGTAAATCTA  
TGGGCTCAACCCATAAACTGCTTTCAAACCTGTTTTCTTGGTGTAGTGCAGAGGTAGGCGGAATTCCTCGTGTAGCGGTG  
AAATGCGTAGAGATGGGAGGAACACCAGTGGCGAAGGCGCTGCTGGCTTAACTGACGCTGAGGCACGAAAGCGTG  
GGTAG

>ASV:5229:Genus:Ruminococcaceae\_NK4A214\_group

AACGTAGGTCAACGCGTTGTCCGGAATTACTGGGTTAAAGGGAGCGCAGGCGGGAAGGCAAGTCAGATGTAAATCTA  
TGGGCTTAACTATAAACTGCAATTTGAACTGTATCTCTTGGTGTAGTGCAGAGGTAGATGGAATTCCTGTGTAGCGGTG  
AAATGCGTAGATATAAGGAAGAACCAGTGGCGAAGGCGATCTACTGGACAGTAACTGACGCTGAGGCGGAGAGCGTG  
GGGAG

>ASV:5230:Genus:Anaerococcus

TACGTATGGACGAGCGTTGTCCGGAATTACTGGGCTTAAAGGGTACGTAGGCGGCCTAGTAAAGTTAGAAGTAAATATA  
ATAGCTCAACTATATAAAGCTTTTAAACTGTAGGCTTGGAGAGTAAAGGGAAAGTGAATTCCTAGTGTAGCGGTGA  
AATGCTTAGATATCACGAAGAACTCCGATTGCGAAGGCAGCTGCTAAGCTGCAACTGACATTGAGGCTCGAAAGTGTGG  
GTATC

>ASV:5231:Genus:Lactonifactor

TACGTAGGGGGCAAGCGTTATCCGGATTACTGGGTTTAAAGGGAGCGTAGACGGCAGTGCAAGTCTGAAGTAAAGGCC  
GGGGCTCAACCCGGGACTGCTTTGAAACTGTGCAGCTAGAGTGTCCGAGAGGCAGGCGGAATTCGTGGTGTAGCGGTG  
AAATGCTTAGATATCACGAAGAACTCCGATTGCGAAGGCAGCTGCTAAGCTGCAACTGACACTGAAGCACGAAAGCGTG  
GGGAT

>ASV:5232:Species:yonginensis

TACGGAGGGTGCAAGCGTTGTCCGGAATTACTGGGTTTAAAGGGTGCCTAGGTTGGCCGTTAAGTCCGGGGTAAAGGCC  
ACAGCTCAACTGTGAACTGCCCTGGATACTGGCGGCTTGGTCCAGACGAGGTTGGCGGAATGGAAGATGTAGCGGTG  
AAATGCATAGATATCTCCAGAACCCTGATTGCGTAGGCAGCTGACTAGGCTGGTACTGACACTGAGGCACGAAAGCGTG  
GGGAG

>ASV:5233:Genus:Holdemania

TACGTAGGTGCGAGCGTTATCCGGAATTACTGGGCTTAAAGGGTGCAGGCGGTTTGAAGTTTAAAGTAAAGCGT  
GGGGCTTAAACCCATATAGCCTTAGAACTGTCACTAGAGTACAGGAGAGGGCAATGGAATTCATGTGTAGCGGTAA  
AATGCGTAGATATCACGAAGAACTCCGATTGCGAAGGCAGCTTACTGGATTGTAACGACGCTGATGCTCGAAAGTGTGG  
GTATC

>ASV:5234:Genus:Phocea

TACGTAGGGAGCGAGCGTTGTCCGGAATTACTGGGTTTAAAGGGAGCGTAGGCGGGTCTCAAGTCAAGTGTAAATCTA  
TCGGCTCAACTGGTAGCTGCGTTGAAACTGGGGCTCTTGGTGAAGTAGAGGCAGGCGGAATTCCTAGTGTAGCGGTGA  
AATGCTTAGATATCACGAAGAACTCCGATTGCGAAGGCAGCTCACTAGACTGTTACTGACACTGATGCTCGAAAGTGTGG  
GTATC

>ASV:5235:Genus:Acetanaerobacterium

TACGTAGGGAGCAAGCGTTGTCCGGAATTACTGGGTTTAAAGGGAGCGTAGGCGGGTCTCAAGTTGAATGTGAAATGCA  
GAGGCTCAACCTCTGAATTGCGTTCAAACCTGAGTATCTTGGTGAAGTAGAGGTAGGCGGAATTCGTGGTGTAGCGGTG  
AAATGCTTAGATATCACGAAGAACTCCGATTGCGAAGGCAGCTTACTGGATTGTAACGACGCTGATGCTCGAAAGTGTG  
GGTAT

>ASV:5236:Order:Bacteroidales

TACGGAGGATCCGAGCGTTATCCGATTACTGGGTTTAAAGGGTGCCTAGGCTGTTTTTAAAGTTAGAGGTGAAAGCTC  
GACGCTCAACGTCGAAATTGCCTCTGATACTGAGAGACTAGAGTGTAGTTGCGGAAGCGGAATGCGTGGTGTAGCGGTG  
AAATGCGTAGATATTAGGAGGAACACCAGTGGCGAAGGCGGCTGCTGGACTGTTACTGACACTGAGGCACGAAAGCGTG  
GGGAG

>ASV:5237:Family:Ruminococcaceae

TACGTAGGGAGCGAGCGTTGTCCGGAATTACTGGGTTTAAAGGGAGCGTAGGCGGGAAGACAAGTTGGAAGTAAATGCA  
TGGGCTTAAACCCATAGCTGCTTTCAAACCTGTTTTCTTGGTGTAGTGCAGAGGTAGGCGGATTCGTGGTGTAGCGGTG  
AAATGCTTAGATATCACGAAGAACTCCGATTGCGAAGGCAGCTGCTGGACTGTAACGACGCTGATGCTCGAAAGTGTG  
GGTAT

>ASV:5238:Genus:Ornithinimicrobium

TACGTAGGGTGCAGCGTTGTCCGGAATTACTGGGCTTAAAGAGCTTGTAGGCGGTTTGTCCGCTGCTGTGAAAGCCC  
GGGGCTTAACTCCGGTCTGCACTGGGTACGGGCAGACTAGAGTATGGTAGGGGAGACTGGAATTCCTGGTGTAGCGGTG  
GAATGCGCAGATATCAGGAGGAACACCAGTGGCGAAGGCAGCTCTCTGGCCATAACTGACGCTGAGAAGCGAAAGCATG  
GGTAG

>ASV:5239:Genus:Aquabacterium

TACGTAGGGTGCAGCGTTAATCGGAATTACTGGGCTTAAAGCGTGCAGGCGGCTTTGCAAGACAGATGTAAATCCC  
CGGGCTCAACCTGGGAACTGCAATTTGTACTGCAAGCTAGAGTGCAGGAGGGAGATGGAATTCCTCGTGTAGCAGTG  
AAATGCGTAGATATGCGGAGGAACACCAGTGGCGAAGGCAATCTCTGGGCTGTACTGACGCTCATGCACGAAAGCGTG  
GGGAG

>ASV:5240:Genus:Bacteroides

TACGGAGGATCCGAGCGTTATCCGATTACTGGGTTTAAAGGGAGCGTAGACGGATGGACAAGTCTGATGTGAAAGACT

GGGGCTCAACCCGGGACTGCATTGAAACTGCCCGTCTTGTAGTACAGTAGAGGTGGCGGAATTCGTGGTGTAGCGGTG  
AAATGCTTAGATATCACGAAGAACTCCGATTGCGAAGGCAGCCTGCTAAGCTGCAACTGACATTGAGGCTCGAAAGTGTG  
GGTAT  
>ASV:5241:Order:Clostridiales  
TACGTAGGTGGCGAGCGTTGTCCGGAATTATTGGGCGTAAAGAGCATGTAGGCGGCTTAATAAGTCGAGCGTGAAAATCC  
GGGGCTCAACCCGGAAGTGCCTTTGAAACTGTAAGGCTAGAGTGCAGGAGGGGTGAGTGGAATTCCTAGTGTAGCGGTG  
AAATGCGTAGATATTAGGAGGAACACCAGTGGCGAAGGCAGCTCACCGGACTGTAACGACTGAGGCTCGAAAGCGTG  
GGGAG  
>ASV:5242:Order:Mollicutes\_RF39  
TACGTAGGGGCGAGCGTTATCCGGATTTATTGGGCGTAAAGCGTGTAGGCGGTTTGTAAAGTATAAGATAAAAAGCCC  
GGAGCTCAACTCCGGTTCGTCTTACAAACTGGCAGACTTGTAGTGTGGTAGAGGCAAGTGGAATTCCTAGTGTAGCGGTTA  
AATGGGTAGATATTAGAAGGAACACCAGTGGCGAAGGCGGCTTGTGGGCCATTACTGACGCTGAGACACGAAAGCGTGG  
GGAGC  
>ASV:5243:Family:Rhizobiaceae  
TACGAAGGGGCTAGCGTTGTCCGGAATTACTGGGCGTAAAGCGCACGTAGGCGGATATTTAAGTCAGGGGTGAAAATCCC  
GGGGCTCAACCTCGGAAGTGCCTTTGATACTGGGTATCTTGTAGTATGGAAGAGGTAAGTGGAATTCGAGTGTAGAGGTG  
AAATTCGTAGATATTCGAGGAACACCAGTGGCGAAGGCGGCTTACTGGTCCATTACTGACGCTGAGGTGCGAAAGCGTG  
GGGAG  
>ASV:5244:Phylum:Firmicutes  
TACGTAGGGGCGAGCGTTGTCCGGAATTATTGGGCGTAAAGGGCGCTAGACGGCTGTGTAAGTTATAGGTGAAAAGCCC  
AACTTCAAGTTTGAAGTGCCTGTAATACTGCATGGCTTGTAGTGCAGGAGAGGGAAGCGGAATTCCTAGTGTAGCGGTG  
AAATGCTTAGATATCACGAAGAACTCCGATTGCGAAGGCGGCTGCTAAGCTGCAACTGACATTGAGGCTCGAAAGTGTG  
GGTAT  
>ASV:5245:Family:Muribaculaceae  
TACGGAGGATGCGAGCGTTATCCGGATTTATTGGGTTAAAGGGTGCAGGCGGACAGTCAAGTCAGCGGTAAAACCGC  
GGGGCTCAACCCGCTCAGCCGTTGAAACTGATTATCTAGCGTGGCGTGCAGGTATGCGGAATGCGTTGTAGCGGTGA  
AATGCATAGATATGACGCAGAACTCCAATTGCGAAGGCAGCATACCGGGCGCTACGGACGCTGAGGCACGAAAGCGTGG  
GTATC  
>ASV:5246:Class:Gammaproteobacteria  
TACGTAGGGAGCGAGCGTTGTCCGGAATTACTGGGCGTAAAGGGTGCCTAGGCGGCTGAAAAGTCCGGATGTGAAAATCCC  
CGTGCTTAACATGGGAGCTGCATTCGAAACTTTCGGACTTGTAGTGTGCGAGAGGTAAGCGGAATTCCTAGTGTAGCGGTG  
AAATGCGTAGATATCGGAGGAATACCGTGGCGAAGGCGGCCCTTGACAAAGACTGACGCTCAGGTGCGAAAGCGTG  
GGGAG  
>ASV:5247:Genus:Ruminiclostridium\_9  
TACGTAGGGAGCAAGCGTTATCCGGATTTACTGGGTGTAAGGGCGTGTAGGCGGGACAACAAGTCAGATGTGAAAACCTA  
TGGGCTCAACCCATAGCCTGCATTTGAAACTGCTGTTCTTGTAGTGTGAGAGGCAATGGAATTCCTAGTGTAGCGGTG  
AAATGCGTAGATATTAGGAAGAACACCAGTGGCGAAGGCGGCTTGTCTGGACAGTAACGACGCTGATGCGCGAAAGTGTG  
GGGAG  
>ASV:5248:Genus:Dielma  
TACGTATGGAGCAAGCGTTATCCGGATTTACTGGGTGTAAGGGAGTGTAGGTGGCCATGCAAGTCAGAAGTAAAATCC  
GGGGCTCAACCCGGAAGTGCCTTTGAAACTGCTGGCTGGAGTGCAGGAGAGGACAATGGAATTCCTAGTGTAGCGGTA  
AAATGCGTAGATATGAGGAGAACACCAGTGGCGAAGGCGGTTGTCTGGCCTGTAACGACGCTGAAGCACGAAAGCGTG  
GGGAG  
>ASV:5249:Family:Ruminococcaceae  
AACGTAGGTACAAGCGTTGTCCGGAATTACTGGGTGTAAGGGAGCGCAGGCGGGAAGGCAAGTCAGATGTGAAAACCTA  
TGGGCTCAACCCATAGCCTGCATTTGAAACTGTTTTCTTGTAGTGTGAGAGGCAATCGGAATTCCTAGTGTAGCGGTG  
GAATGCGTAGATATCGGAGGAACACCAGTGGCGAAGGCGGCTACTGGGCACCAACTGACGCTGAGGCTCGAAAGTGTG  
GGTAG  
>ASV:5250:Order:Bacteroidales  
TACGTAGGTGGCGAGCGTTATCCGGATTTATTGGGTGTAAGGGTGCCTAGGCGGGTTCGTAAGTCAGATGTGAAATGCG  
GAGGCTCAACCTCCGAACTGCATTTGAAACTTACGACCTTGTAGTGGAGTAGAGGCAAGCGGAATTCCTAGTGTAGCGGTG  
AAATGCATAGATATCACGCAGAACTCCGATTGCGAAGGCAGCTTACTAAACATAACTGACACTGAAGCACGAAAGCGTG  
GGGAT  
>ASV:5251:Family:Ruminococcaceae  
TACGTAGGGAGCAAGCGTTATCCGGATTTACTGGGTGTAAGGGAGCGTAGGCGGTCGCGCAAGTCTGATGTGAAATCCA  
TGGGCTCAACCCATGAAGTGCATTTGAAACTGTAGATCTTGTAGTGTGAGAGGTTGACGGAATTCCTAGTGTAGCGGTG  
AAATGCGTAGATATTAGGAGGAACACCAGTGGCGAAGGCGGTTCAACTGGACGATAACTGACGCTGAGGCGCGAAAGCGTG  
GGGAG  
>ASV:5252:Family:Ruminococcaceae  
TACGTATGGTGAAGCGTTATCCGGATTTACTGGGTGTAAGGGAGCGTAGGCGGGATCTTAAGTCAGGTGTGAAAACCTA  
TGGGCTCAACCCATAGACTGCATTTGAAACTGAGGTTCTTGTAGTGTGAGAGGTTAGCGGGAATTCCTAGTGTAGCGGTG  
GAATGCGTAGATATCGGAGGAACACCAGTGGCGAAGGCGGCTACTGGGCACCAACTGACGCTGAGGCTCGAAAGTGTG  
GGTAG  
>ASV:5253:Genus:Oscillibacter  
TACGTATGGTGAAGCGTTATCCGGATTTACTGGGTGTAAGGGCGTGCAGCCGGGCGGCAAGTCTGATGTGAAATCTG  
GAGGCTTAACTCCAACTGCATTTGAAACTGTAGGCTTGTAGTACCAGGAGGTTATCGGAATTCCTTGTGTAGCGGTG  
AAATGCGTAGATATAAGGAGGAACACCAGTGGCGAAGGCGGCTTACTGGACGATAACTGACGCTGAGGCTCGAAAGCGTG  
GGGAG

>ASV:5254:Order:Clostridiales  
TACGGAGGATCCGAGCGTTATCCGGATTTATTGGGTTTAAAGGGAGCGTAGGCGGACGCTTAAGTCAGAGGTGAAAGGCT  
GTGGCTCAACCGTAGTAAGCCTTTGAAACTGGGAACTTGAGTGCAGGAGAGGAGAGTGGAATTCCTAGTGTAGCGGTGA  
AATGCGTAGATATTAGGAGGAACACCAGTGGCGAAGGCGGCTTACTGGACGATGACTGACGCTGAGGCTCGAAAGCGTGG  
GGAGC

>ASV:5255:Genus:Alistipes  
TACGGAGGATCCAAGCGTTATCCGGATTTATTGGGTTTAAAGGGTGCCTAGGCGGTTTGATAAGTTAGAGGTGAGATACC  
GGGGCTCAACCCGAACTGCCTTAATACTGTTGAACTAGAGAGTAGTTGCGGTAGGCGGAATGTATGGTGTAGCGGTG  
AAATGCGTAGAGATTAGGAAGAACACCAGTGGCGAAGGCGACTTTCTGGACGAAAACTGACGCTGAGGCGCAAAAGCGTG  
GGGAG

>ASV:5256:Family:Lachnospiraceae  
TACGTAGGGGGCAAGCGTTATCCGGATTTACTGGGTGTAAGGGAGCGTAGACGGTGAAGCAAGTCTGAAGTGAAGGTT  
GGGGCTCAACCCGAACTGCCTTTGAAACTGTTTACTGGAGTACAGGAGAGGTGAGTGAATTCCTAGTGTAGCGGTG  
AAGTGCCTAGATATTAGGAGGAACACCAGTGGCGAAGGCGACTAACTGGACTGTAACGACGCTGAGGCGCAAAAGGTG  
GGGAG

>ASV:5257:Genus:DTU089  
TACGTAGGGAGCGGGCGTTGTCCGGAATTACTGGGTGTAAGGGTGCCTAGGCGGATACGCAAGTCAGTAGTGAATGCA  
TGGGCTTAACCCATGACTGCATCTTAACTGGGACTGTTCTTGGAGTGAAGTAGAGGCAAGTGAATTCCTAGTGTAGCGGTG  
AAATGCGTAGAGATCGGGAGGAACACCAGTGGCGAAGGCGGCTGCTGGACGACAACGACGCTGAGGCGCAAAAGCGTG  
GGGAG

>ASV:5258:Family:Ruminococcaceae  
TACGGAGGATCCGAGCGTTATCCGGATTTATTGGGTTTAAAGGGCGCGTAGGCGGGATGGCAAGTCAGATGTGAAATCCA  
TGGGCTCAACCCATGAACTGCATCTTAACTGGGACTCTTGGAGGCAAGTGAATTCCTAGTGTAGCGGTG  
AAATGCGTAGATATTAGGAGGAACACCAGTGGCGAAGGCGGCTTACTGGACGATGACTGACGTTGAGGCTCGAAAGCGTG  
GGGAG

>ASV:5259:Family:Peptococcaceae  
TACGTAGGGAGCGAGCGTTGTCCGGAATTACTGGGCGTAAAGGGCGCGTAGGCGGGTTTTAAGTAGGGTGTGAAAACCTA  
TAGGCTTAACCTGTAGACTGCATCTTAACTGGGACTCTTGGAGGCAAGGAGGAAAGTGAATTCCTAGTGTAGCGGTG  
AAATGCGTAGATATTAGGAGGAACACCAGTGGCGAAGGCGGCTTACTGGACTGTACCTGACGCTGAGGCGCAAAAGCGTG  
GGGAG

>ASV:5260:Genus:Blautia  
TACGGAGGATCCGAGCGTTATCCGGATTTATTGGGTTTAAAGGGAGCGTAGACGGATTAGCAAGTCTGATGTGAAAGGCA  
GGGGCTCAACCCCTGACTGCATCTGAAACTGCCAGTCTTGGAGGCAAGGAGGTAAGCGGAATTCCTAGTGTAGCGGTG  
AAATGCGTAGATATTAGGAGGAACACCAGTGGCGAAGGCGGCTTACTGGACGCAACGACGTTGAGGCTCGAAAGCGTG  
GGGAG

>ASV:5261:Genus:Cuneatibacter  
TACGGAGGATCAAGCGTTATCCGGATTTATTGGGTTTAAAGGGTGCCTAGGCGGCGAGTTAGTCAGAAGTGAATATC  
GGGGCTTAACCCCGGGGCTGCTTCTGATACTGCTGTCTCGAGTGCAGGAGAGGTAAGTGAATTCCTAGTGTAGCGGTG  
AAATGCGTAGATATTAGGAGGAACACCAGTGGCGAAGGCGACTTACTGGACTGTAACGACGCTGAGGCTCGAAAGCGTG  
GGGAG

>ASV:5262:Genus:Parabacteroides  
TACGGAGGATCCGAGCGTTATCCGGATTTATTGGGTTTAAAGGGTGCCTAGGCGGCTTTTAAAGTCAGCGGTGAAAGTCT  
GTGGCTCAACCATAGAATTGCCGTTGAAACTGTCTGCTAGAGTTCGAGTGAAGTATGCGGAATGCGTTGTGTAGCGGTG  
AAATGCTTAGATATCACGAAGAACTCCGATTGCGAAGGCGAGTCTTAAACCATAACGACTGAAGCACGAAAGCGTG  
GGGAT

>ASV:5263:Order:Clostridiales  
TACGTAGGTAGCAAGCGTTGTCCGGAATGACTGGGCGTAAAGGGTGCCTAGGCGGTTTAAACAAGTTGGTAGTGAATTC  
GAAGCTTAACCTCGGCGCTACTGCCAAGACTGTTGAACTTGAAGTACAGGAGAGGTAAGTGAATTCCTAGTGTAGCGGTG  
GAATGCGTAGATATTAGAAGGAACACCAGTGGCGAAGGCGAGTCTCTGGGCCCTCACGACGCTGAGGAGCGAAAGCGTG  
GGGAG

>ASV:5264:Order:Bacteroidales  
AACGTAGGTCAACAGCGTTGTCCGGAATTAAGGGTGCCTAGGCGGCAAGGCAAGTCAAGGCGTGAATCTG  
TGGGCTTAACCCACAACTGCGCTTGAAGTGTCTTGGTGAAGTGAAGTAGAGGTAGGCGGAATTCCTAGTGTAGCGGTG  
AAATGCGTAGATATCACGCAAGAACTCCGATTGCGAAGGCGAGTCTTAAACCATAACGACTGAAGCACGAAAGCGTG  
GGGAT

>ASV:5265:Family:Ruminococcaceae  
TACGGAAAGATGCGAGCGTTATCCGGATTTATTGGGTTTAAAGGGAGCGTAGGCGGGAGTGAAGTTGAATGTGAAAACCTA  
TGGGCTCAACCCATCGTTGCGTTCAAAGTGCATTTCTTGGTGAAGTAGAGGTAAGCGGAATTCCTAGTGTAGCGGTG  
AATGCGTAAATATTAGGAGGAACACCAGTGGCGAAGGCGGCTTACTGGGCTTAACTGACGCTGAGGCTCGAAAGCGTGG  
GTAGC

>ASV:5266:Genus:Streptococcus  
AACGTAGGTCAACAGCGTTGTCCGGAATTAAGGGTGCCTAGGCGGCAAGGCAAGTCAAGTGAAGTTAAAGGCT  
GTGGCTCAACCATAGTTCGCTTTGAAACTGTCAAATGAGTGCAGAGGGGAGAGTGGAATTCATGTGTAGCGGTG  
AATGCGTAGATATATTAGGAGGAACACCAGTGGCGAAGGCGGCTCTGCTGTTGTAACGACGCTGAGGCTCGAAAGTGTGG  
GTAGC

>ASV:5267:Family:Lachnospiraceae  
TACGTAGGGGGCAAGCGTTATCCGGATTTACTGGGTGTAAGGGAGCGTAGACGGTACGCAAGTCTGAAGTGAAGGCC  
CGGCTCAACTGCGGACTGCTTTGAAACTGCCAAGTGGAGTGTGGAGAGGTAAGTGAATTCCTAGTGTAGCGGTG

AAATGCGTAGATATTAGGAGGAACACCAGTGGCGAAGGCGGCTTACTGGACGATAACTGACGTTGAGGCTCGAAAGCGTG  
GGGAG  
>ASV:5268:Genus:Ruminococcaceae\_UCG-010  
TACGTAGGTGGCGAGCGTTATCCGGATTTACTGGGTGTAAAGGGTGTGTAGGCGGGATGCAAGTCAGATGTGAAAATTA  
CGGGCTCAACCCGTAACCTGCATTTGAAACTGCAGCTCTTGAGTATGGGAGAGGTAAGCGGAATTCCTGGTGTAGCGGTG  
AAATGCGTAGATATCAGGAGGAACACCAGTGGCGAAGGCGGCTTACTGGACCAACTGACGCTGAGACACGAAAGCGTG  
GGGAG  
>ASV:5269:Order:Clostridiales  
TACGGAGGATCCGAGCGTTATCCGGATTTATTGGGTTAAAGGGAGCGTAGGCGGACGCTTAAGTCAGAAGTAAAATTA  
CGGGCTCAACTCGTAACCTGCTTTTGAAGTACATTCTTGAGTGAAGTAGAGGCAAGCGGAATTCCTAGTGTAGCGGTG  
AAATGCGTAGATATTGGGAGGAACACCAGTGGCGAAGGCGCCTTCTGGACTGTGTCTGACGCTGAGATGCGAAAGCCAG  
GGTAG  
>ASV:5270:Genus:Ruminococcaceae\_UCG-004  
TACGGAGGATCCGAGCGTTATCCGGATTTATTGGGTTAAAGGGAGCGTAGGCGGACGCTTAAGTCAGTTGTGAAAGTTT  
GCGGCTCAACCACTGGCCTGCATTTGAAACTGTTTTCTTGAGTGTAGGAGGCGAGCGGAATTCCTGTGTAGCGGTG  
AAATGCGTAGATATACGGAGGAACACCAGTGGCGAAGGCGGCTTCTGGACATTAAGTACGCTGAGGCGCGAAAGCGTG  
GGGAG  
>ASV:5271:Family:Ruminococcaceae  
TACGTAGGTGGCAAGCGTTGTCCGGATTTACTGGGTGTAAAGGGAGCGCAGGCGGTACGGCAAGTCTGATGTGAAATACC  
GGGGCTTAACCCGGGGCTGCATTTGAAACTGCGGTTCTTGAGTGCAGGAGAGGAAAGCGGAATTCCTAGTGTAGCGGTG  
GAATGCGTAGATATCAGGAGGAACACCAGTGGCGAAGGCGGCTTACTGGGACCAACTGACGCTGAGGCTCGAAAGTGTG  
GGTAG  
>ASV:5272:Family:Peptostreptococcaceae  
AACGTAGGTCAACAGCGTTGTCCGGATTTACTGGGTGTAAAGGGTGCCTAGGCGGCTTTTAAAGTCAGGAGTAAAAGGCT  
ACGGCTCAACCGTAGTAAGCTCTTGAAGTGGAGGACTTGTAGTGCAGGAGAGGAGAGTGAATTCCTAGTGTAGCGGTG  
AATGCGTAGATATTAGGAGGAACACCAGTAGCGAAGGCGGCTTACTGGACGTTAACTGACATTGAGGCTCGAAAGTGTG  
GTATC  
>ASV:5273:Genus:Lactococcus  
AACGTAGGTCCCGAGCGTTGTCCGGATTTATTGGGCGTAAAGCGAGCGCAGGTGGTTTATTAAGTCTGGTGTAGAAAGGCA  
GTGGCTCAACCACTGTATGCATTGGAAGTGGTAGACTTGTAGTGCAGGAGAGGAGAGTGAATTCCTAGTGTAGCGGTG  
AATGCGTAGATATCAGGAGGAACACCAGTGGCGAAGGCGGCTTCTGGCCTGTAAGTACACTGAGGCTCGAAAGCGTG  
GGAGC  
>ASV:5274:Family:Ruminococcaceae  
TACGTAGGGAGCGAGCGTTGTCCGGATTTACTGGGTGTAAAGGGTGCCTAGGCGGGCTGTCAAGTCAGATGTGAAATACC  
GGAGCTCAACTCCGGGGCTGCATTTGAAACTGATGGTCTTGAGTGAAGTAGAGGCGAGCGGAATTCCTAGTGTAGCGGTG  
AAATGCGTAGATATTAGGAGGAACACCAGTGGCGAAGGCGGCTTACTGGACCAACTGACGCTGATGCTCGAAAGTGTG  
GGTAT  
>ASV:5275:Family:Ruminococcaceae  
TACGGAGGATCCGAGCGTTATCCGGATTTATTGGGTTAAAGGGAGCGTAGGCGGACGCTTAAGTCAGTTGTGAAATCCA  
TGGGCTCAACCCATAAAGTCTTTCAAAGTGTCTTCTTGAGTGTAGGAGGAGGAGGAGGAGTGAATTCCTAGTGTAGCGGTG  
GAATGCGTAGATATCAGGAGGAACACCAGTGGCGAAGGCGGCTTACTGGACGATAACTGACGCTGAGGCTCGAAAGCGTG  
GGGAG  
>ASV:5276:Genus:Cuneatibacter  
TACGTAGGGGGCAAGCGTTATCCGGATTTACTGGGTGTAAAGGGAGTGTAGGCGGCGATGCAAGTCAGAAGTAAAAGCCC  
AGGGCTTAACCGTGGGACTGCTTTTGAAGTGTGTTGCTGGATTGCCGGAGAGGTAAGTGAATTCCTAATGTAGCGGTG  
AAATGCGTAGATATTAGGAGGAACACCAGTGGCGAAGGCGGCTTACTGGGACCAACTGACGCTGAGGCTCGAAAGTGTG  
GGTAG  
>ASV:5277:Kingdom:Bacteria  
TACGTAGGGAGCAAGCGTTATCCGGATTTACTGGGTGTAAAGGGCGCGCAGGCGGGCCGGCAAGTTGGAAGTAAAATCCA  
TGGGCTCAACCCATGAAGTCTTTCAAAGTGTCTTCTTGAGTGTAGGAGGAGGAGGAGGAGTGAATTCCTAGTGTAGCGGTG  
AAATGCTTAGATATCACGAAGAAGTCCGATTGCGAAGGCGAGTCACTGGAGTGTAACTGACGCTGATGCTCGAAAGTGTG  
GGTAT  
>ASV:5278:Family:Lachnospiraceae  
TACGTATGGGGCAAGCGTTATCCGAATTTACTGGGTGTAAAGGGAGCGTAGGCGGCATGGCAAGTCAGAAGTAAAAGCCC  
GGGGCTCAACCCGGGACTGCTTTGAAACTATGCAGCTAGAGTGTCCGGAGAGGTAAGTGAATTCCTAGTGTAGCGGTG  
AAATGCGTAGATATTGGGAGGAACACCAGTGGCGAAGGCGGCTTACTGGACTGTAGCTGACACTGAGGCACGAAAGCGTG  
GGGAG  
>ASV:5279:Family:Ruminococcaceae  
TACGTAGGGAGCAAGCGTTATCCGGATTTACTGGGTGTAAAGGGCGTGTAGGCGGGATTGCAAGTCAGGCGTAAAACCTA  
TGGGCTTAACCCATAGCCTGCGTTTGAAGTGTAGTTCTTGAGTGTGGAGAGGCAATCGGAATTCCTGTGTAGCGGTG  
AAATGCTTAGATATCACGAAGAAGTCCGATTGCGAAGGCGAGTCACTGGAGCGCAACTGACGCTGAAGTCTGAAAGTGTG  
GGTAT  
>ASV:5280:Genus:Oscillospira  
TACGTAGGTGGCAAGCGTTGTCCGGATTTACTGGGTGTAAAGGGCGTGTAGCCGGGTCGGCAAGTCAGATGTGAAATCTG  
GAGGCTCAACCTCAAAGTGCATTTGAAACTGTTGATCTTGAGTATCGGAGAGGTAATCGGAATTCCTAGTGTAGCGGTG  
AAATGCGTAGATATTAGGAGGAACACCAGTGGCGAAGGCGGCTTACTGGAGCGCAACTGACGCTGAGGCTCGAAAGTGTG  
GGTAT  
>ASV:5281:Family:Lachnospiraceae

AACGTAGGTCAACAGCGTTGTCCGGAATTACTGGGTGTAAAGGGAGCGAGCGGGAAGACAAGTTGGAAGTAAAATCCA  
TGGGCTCAACCCCGGACTGCTTTGAAAAGTGTAACTAGAGTGTGGAGAGGTAAGCGGAATTCCTAGTGTAGCGGTG  
AAATGCGTAGATATTAGGAGGAACACCAGTGGCGAAGGCGACTTACTGGACTGCAACTGACGTTGAGGCACGAAAGTGTG  
GGGAG

>ASV:5282:Family:Lachnospiraceae

TACGTAGGTGGCAAGCGTTATCCGGATTTACTGGGTGTAAAGGGAGCGTAGACGGCTGTGCAAGTCTGAAGTAAAAGGCA  
TGGGCTCAACCTGTGGACTGCTTTGAAAAGTGTGCAGCTAGAGTGTCCGAGAGGTAAGTGAATTCCTAGTGTAGCGGTG  
AAATGCGTAGATATTACGAAGAACTCCGATCGCGAAGGCATTGTGCCGGGCGAGCACGACGCTGAGGCTCGAAAGTGGC  
GGTAC

>ASV:5283:Family:Ruminococcaceae

TACGTAGGTGGCGAGCGTTGTCCGGAATTACTGGGTGTAAAGGGCGAGTAGGCGGACACACAAGTCAAGTAAAATCTC  
TGGGCTTAACCCAGAAACTGCTTTTAAAAGTGTGTGCCTTGAAGTCCGAGAGGAAAGCGGAATTCCTAGTGTAGCGGTG  
AAATGCGTAGATATTAGGAGGAACACCAGTGGCGAAGGCGGCTTTCTGGACGGTAACGACGCTGAGGCGCGAAAGCGTG  
GGGAG

>ASV:5284:Genus:Ruminococcaceae\_UCG-003

TACGTAGGTGGCAAGCGTTGTCCGGAATTTACTGGGTGTAAAGGGCGTAGCCGGGCATGCAAGCCAGATGTAAAATCTC  
AGGGCTTAACCTGAAACTGCATTTGAAAAGTGTATGTCTTGAAGTCCGAGAGGTAATCGGAATTCCTGTGTAGCGGTG  
AAATGCGTAGATATCACGAGAACCCCGATTGCGAAGGCAGCTGTAGGTTGAAACAGACGCTGAGGCACGAAAGCGTG  
GGTAT

>ASV:5285:Family:Ruminococcaceae

TACGGAGGATCCGAGCGTTATCCGGATTTATTGGGTTAAAGGGAGCGTAGGCGGGTGATCAAGTCAAGTGTAAAACCTA  
CGGGCTTAACCCGAGACTGCAGTTGAAAAGTGTTCATCTTGAAGTGAAGTAGAGGTTGGCGGAATTCGAGTGTAGCGGTG  
AAATGCGTAGAGATTAGGAAGAACACCGGTGGCGAAGGCGACTTTCTGGACGAAAACGACGCTGAGGCGCGAAAGCGTG  
GGGAG

>ASV:5286:Family:Lachnospiraceae

TACGTAGGGGGCAAGCGTTATCCGGATTTACTGGGTGTAAAGGGAGCGTAGACGGTGTGGCAAGTCTGATGTAAAAGGCA  
TGGGCTCAACCTGTGGACTGCATTGAAAAGTGTACACTTGAAGTCCGAGAGGGTAAGCGGAATTCGAGTGTAGCGGTG  
AAATGCTTAGATATCACACAGAACACCGATTGCGAAGGCAGCTTTCCAAGCTATTACTGACGCTGATGACGAAAGCGTG  
GGGAG

>ASV:5287:Family:Lachnospiraceae

TACGTAGGGAGCAAGCGTTATCCGGATTTACTGGGTGTAAAGGGAGTGTAGGTGGCCATGCAAGTCAAGTAAAATCC  
GGGCTCAACCCCGAACTGCTTTTAAAAGTGTAAAGGCTAGAGTGCAGGAGGGTGAAGTGAATTCCTAGTGTAGCGGTG  
AAATGCGTAGATATTAGGAGGAACACCAGTGGCGAAGGCGGCTTACTGGACGATCACTGACGTTGAGGCTCGAAAGCGTG  
GGGAG

>ASV:5288:Family:Ruminococcaceae

TACGTAGGTGGCAAGCGTTGTCCGGAATTACTGGGTGTAAAGGGAGCGTAGGCGGGAGTGAAGTCCGGCTGTCTAAACTA  
TGGGCTCAACCCATAATCGCGGCCGAAACTGTACTTCTTGAAGTGAAGTAGAGGTAAGCGGAATTCCTAGTGTAGCGGTG  
AATGCGTAGATATTAGGAGGAACATCAGTGGCGAAGGCGGCTTACTGGGCTTTAACTGACGCTGAGGCTCGAAAGTGTG  
GTAGC

>ASV:5289:Order:Clostridiales

TACGTAGGGGCTAGCGTTATCCGGATTTACTGGGCTAAAGGATGCGTAGGTGGTTTCTTAAGTCAAGGTTAAAAGGCT  
ACGGCTCAACCGTAGTAAGCCTTTGAAACTGCGGTTCTTGAAGTGAAGTAGAGGTAAGCGGAATTCCTAGTGTAGCGGTG  
AATGCGTAGATATTAGGAGGAACATCAGTGGCGAAGGCGGCTTACTGGGCTTTAACTGACGCTGAGGCTCGAAAGCGTG  
GGAGC

>ASV:5290:Family:Rikenellaceae

TACGGAGGACCCGAGCGTTATCCGGATTTATTGGGTTAAAGGGTGCAGTAGGCGGATTAGTAAGTTAGAGGTAAAAGCTC  
GATGCTCAACATCGAAATGCTCTGATACTGTTAGTCTAGAGTATAGTTGCGGAAGCGGGAATGTGTGGTGTAGCGGTG  
AAATGCGTAGATATTGAGGAGAACACCAGTGGCGAAGGCGACTTACTGGGCTTAACTGACGCTGAGGCTCGAAAGCATG  
GGTAG

>ASV:5291:Family:Ruminococcaceae

TACGGAGGATCCGAGCGTTATCCGGATTTATTGGGTTAAAGGGAGCGAGGCGGACGCTTAAAGTCAAGTGTAAAAGTGT  
GCGGCTCAACCCACAAATTGCTTTTAAAAGTGTCTTGAAGTGGTGTAGAGGTAGGCGGAATTCGCGGTGTAGCGGTG  
GAATGCGTAGATATTGAGGAGAACACCAGTGGCGAAGGCGGCTTACTGGGCTTAACTGACGCTGAGGCTCGAAAGCATG  
GGTAG

>ASV:5292:Phylum:Firmicutes

TACGTAGGGGGCGAGCGTTGTCCGGAATTTATTGGGCTAAAGGGCGTAGACGTTTTATAAGTTACAGGTAAAAGCCC  
ATTTTTCAAGGATGGAAGTGCCTGTAAGACTGTAGGACTTGAAGTGCAGGAGAGGGAAGCGGAATTCGAGTGTAGCGGTG  
AAATGCGTAGATATTGAGGAGAACACCAGTGGCGAAGGCGGCTTTCTGGACTGCAACTGACGTTGAGGCGCGAAAGCGTG  
GGGAG

>ASV:5293:Class:Gammaproteobacteria

TACGGAGGGTGCAGCGTTAATCGGAATTTACTGGGCTAAAGCGCACGAGGCGGTTTTGTTAAGTCAAGTGTAAAATCCC  
CGGGCTCAACTTGGGAAGTGCATCTGATACTGGCAAGCTTGAAGTCTGTAAGGGGAGGCGGAATTCCTAGTGTAGCGGTG  
AAATGCGTAGATATTAGGAGGAACACCAGTGGCGAAGGCGGCTTCTGGACGACAACGACGCTGAGGCGCGAAAGCGTG  
GGGAG

>ASV:5294:Family:Bifidobacteriaceae

TACGTAGGGGGCAAGCGTTATCCGGATTTATTGGGCTAAAGAGTGCAGTAGGTGTTAAAGTCAAGCGGGGTTAAAGGCA  
ATGGCTTAACCATTTGTCGCCCGGAACTGGGATACTTGAAGTGCAGGAGAGGAAAGCGGAATTCGCGGTGTAGCGGTGG  
AATGTGTAGATATCGGAAGAACCAATGGCGAAGGCGAGTCTCTGGGCGTCACTGACGCTGAGGAGCGAAAGCGTG

GGAGC  
>ASV:5295:Phylum:Bacteroidetes  
AACGTAGGTCACAAGCGTTGTCCGGAATTACTGGGTTTAAAGGGAGCGTAGGTGGACAGTTAAGTCAGTTGTGAAAATTT  
GCGGCTCAACCCGTAATAATTGCAGTTGATACTGGCTGTCTTGAGTACAGTAGAGGTGGCGGAATTCGTGGTGTAGCGGTG  
AAATGCGTAGATATTAGGAGGAACACCAGTGGCGAAGGCGGTCAACTGGACGATAACTGACGCTGAGGCGCAAAGCGTG  
GGGAG  
>ASV:5296:Family:Lachnospiraceae  
TACGGAGGATCTGAGCGTTATCCGGATTTATTGGGTTTAAAGGGAGCGTAGGCGGACTATTAAGTCAGCTGTGAAAATTT  
GCGGCTCAACCCGTAATAATTGCAGTTGATACTGGCTGTCTTGAGTACAGTAGAGGTGGCGGAATTCGTGGTGTAGCGGTG  
AAATGCGTAGATATTAGGAGGAACACCAGTGGCGAAGGCGGTTGCTGGACGACAACGACGCTGAGGCGCAAAGCGTG  
GGGAG  
>ASV:5297:Genus:Erysipelotrichaceae\_UCG-003  
TACGTAGGTGGCGAGCGTTATCCGGAATTATTGGGCTAAAGAGGGAGCGAGCGGCGACTAAGGGTCTGTGGTAAAAGATC  
GAAGCTTAACTTCGGTAAGCCATGAAACCGTAGAGCTAGAGTGTGCGAGAGGATCGTGAATTCATGTGTAGCGGTGA  
AATGCTTAGAGATCATAAGAACACCCGATTGCGAAGGCGACTTACCAAATATATCTGACGTTGAGGCACGAAAGCGTG  
GGAGC  
>ASV:5298:Family:Ruminococcaceae  
TACGTAGGTGGCAAGCGTTGTCTGGATTTACTGGGTGTAAGGGCGTGCAGCCGGGATGCAAGTCAGATGTGAAATCTC  
AGGGCTTAACTTGAAGTGCATTTGAACTGTATGTCTTGAGTACAGGAGAGGCGAGCGGAATTCCTAGTGTAGCGGTG  
AAATGCGTAGATATTAGGAGGAACACCAGTGGCGAAGGCGGCTGCTGGACTTTACTGACACTGAGGCACGAAAGCGTG  
GGGAG  
>ASV:5299:Genus:Papillibacter  
TACGTAGGTGGCAAGCGTTGTCCGGATTTACTGGGTGTAAGGGCGCTAGGCGGGAAGACAAGTCAGATGTGAAATCTC  
CGGGCTCAACCCGAAACTGCATTTGAACTATCTTTCTTGAGTGTGAGAGGCGAGCGGAATTCCTAGTGTAGCGGTG  
AAATGCGTAGATATTAGGAGGAACACCAGTGGCGAAGGCGGCTGCTGGACATTAACGACGCTGAGGCGCAAAGCGTG  
GGGAG  
>ASV:5300:Family:Ruminococcaceae  
TACGTAGGGAGCAAGCGTTGTCCGGATTTACTGGGTGTAAGGGTGGTAGGCGGATCTGCAAGTCAGGCGTGAATCTA  
TGGGCTCAACCCATAAACTGCTTTCAAACCTGTTTTCTTGAGTAGTGCAGAGGTAGGCGGAATTCCTAGTGTAGCGGTG  
GAATGCGTAGATATCGGGAGGAACACCAGTGGCGAAGGCGGCTTACTGGACGATAACTGACGCTGAGGCTCGAAAGTGTG  
GGTAG  
>ASV:5301:Class:Bacteroidia  
TACGGAGGATCCGAGCGTTATCCGGATTTATTGGGTGTAAGGGCGTGTAGCCGGGAGGCAAGTCAGATGTGAAATCCA  
CGGGCTCAACTCGTGAAGTGCATTTGAACTACTCTTCTTGAGTATCGGAGAGGCAATCGGAATTCCTAGTGTAGCGGTG  
AAATGCTTAGATATCACAAGAACCCGATTGCGAAGGCGAGCTTCTAACTGTAACGACGTTATGCTCGAAAGTGTG  
GGTAT  
>ASV:5302:Phylum:Firmicutes  
AACGTAGGTCACAAGCGTTGTCCGGATTTATTGGGCTAAAGGGAACGCAGGCGGCTTTTAAAGTCTGATGTGGAAGCCT  
TCGGCTTAAACGAAGTAGTGCATTGAAACTGTCATACTTGAGTGCCGGAGGGTAAGCGGAATTCCTAGTGTAGCGGTG  
AAATGCGTAGAGATCGGGAGGAACACCAGTGGCGAAGGCGGCTGCTGGGCTTTTACTGACGCTGAGGCACGAAAGCATG  
GGGAG  
>ASV:5303:Class:Bacteroidia  
TACGTAGGGGCGAGCGTTATCCGGATTTATTGGGTTTAAAGGGAGCGTAGATGGGTTGTTAAGTCAGTTGTGAAAATTT  
GCGGCTCAACCGTAAAATTGCAATTGATACTGGCAGTCTTGAGTACGGTAGAGGCAACCGGAATTCCTAGTGTAGCGGTG  
AAATGCGTAGATATTAGAAGGAACACCAGTGGCGAAGGCGGTTTCTGGGCTTTTACTGACGCTGAGGCACGAAAGCGTG  
GGGAG  
>ASV:5304:Family:Ruminococcaceae  
TACGTAGGTGGCAAGCGTTGTCCGGATTTACTGGGTGTAAGGGCGTGCAGCCGGGCTGCAAGTCAGATGTGAAATCCA  
TGGGCTCAACCCATGAACTGCATTTGAACTGATTTCTTGAGTACTGGAGAGGCAATCGGAATTCCTAGTGTAGCGGTG  
AAATGCTTAGAGATCATAAGAACACCAGTGGCGAAGGCGACTTACCAAATATATCTGACGTTGAGGCACGAAAGCGTG  
GGGAG  
>ASV:5305:Genus:Oscillibacter  
TACGTAGGGAGCAAGCGTTGTCCGGATTTACTGGGTGTAAGGGCGTGCAGCCGGGCTGGTAGGTCAGATGTGAAATCTG  
GAGGCTCAACCTCCAACTGCATTTGAACTGCTGGTCTTGAGTACGGAGAGGTTATCGGAATTCCTGTGTAGCGGTG  
AAATGCGTAGATATTAGGAGGAACACCAGTGGCGAAGGCGACTTTCTGGACGTAACGACGTTGAGGCACGAAAGCGTG  
GGGAG  
>ASV:5306:Genus:Ezakiella  
TACGTAAAGGGGCGAGCGTTGTCCGGAATTATTGGGCTAAAGAGTGCAGTAGGCGGCAATTAAGTCAGATGTGAAAACCTA  
AGGGCTCAACCCATAGATTGCATCTGAAACTGATATGCTTGAGTCAAGGAGAGGAAAGTGAATTCCTAGTGTAGCGGTG  
GAATGCGTAGATATTAGGAGGAATACCGTGGCGAAGGCGACTTTCTGGACTTGAACGACGCTGAGGCACGAAAGCGTA  
GGGAG  
>ASV:5307:Family:Ruminococcaceae  
TACGTAGGGAGCAAGCGTTGTCCGGATTTACTGGGTGTAAGGGTGGTAGGCGGCTTTCAAGTCAGATGTGAAAACCC  
GGGGCTTAAACCCGGGCTGCATTTGAACTGTAGGCTTGAGTGTGAGAGGTAAGCGGAATTCCTAGTGTAGCGGTG  
AAATGCGTAGATATTAGGAGGTACACCAGTGGCGAAGGCGGCTTACTGGACATTAACGACGCTGAGGCACGAAAGCGTG  
GGGAG  
>ASV:5308:Family:Ruminococcaceae  
TACGTAGGTGGCGAGCGTTATCCGGATTTACTGGGTGTAAGGGCGAGTAGGCGGATTGCAAGTCAGATGTGAAAACCTA

TGGGCTCAACCCATAGACTGCATTTGAACTGTAGTTCTTGTAGTGAAGTAGAGGTTGGCGGAATTCAGTGTAGCGGTG  
AAATGCGTAGATATTCGGAGGAACACCGTGGCGAAGGCGGCCAACTGGGCTTTAACTGACGCTGAGGCACGAAAGCGTG  
GGTAG  
>ASV:5309:Family:Ruminococcaceae  
TACGTAGGGAGCGAGCGTTGTCCGGAATTACTGGGTGTAAGGGAGCGTAGGCGGGATCGCAAGTCAGATGTGAAAGCCC  
GGGGCTCAACCCGGGACTGCATTTCGAACTGCTGAGCTAGAGTGTGGAGAGGCAAGTGAATTCCTAGTGTAGCGGTG  
AAATGCGTAGATATTAGGAGGAACACCCAGTGGCGAAGGCGGCCAACTGGGCTTTTACTGACGCTGAGGCTCGAAAGTGTG  
GGGAG  
>ASV:5310:Genus:Erysipelotrichaceae\_UCG-003  
TACGTAGGTGGCGAGCGTTATCCGGAATTATTGGGCGTAAAGGGAGCGAGCGGCGACTAAGGGTCTGTGGTAAAAGATC  
GAAGCTTAACCTCGGTAAGCCATGAAACCGTAGAGCTAGAGTGTGTGAGGGGATCGTGAATTCCTAGTGTAGCGGTGA  
AATGCGTAGATATTAGGAGGAACACCCAGTGGCGAAGGCGGCTTACTGGACTGTAAGTACGTTGAGGCTCGAAAGCGTGG  
GGAGC  
>ASV:5311:Family:Ruminococcaceae  
TACGTAGGTGGCAAGCGTTGTCCGATTTACTGGGTGTAAGGGCGTGCAGCCGGTCTGCAAGTCAGATGTGAAAACCA  
TGGGCTCAACCTGTGGACTGCGTTTGAACCTGTTTACTGAGTGAAGTAGAGGTAGGCGGAATTCCTAGTGTAGCGGTG  
AAATGCGTAGAGATCGGGAGGAACACCCAGTGGCGAAGGCGGCTTACTGGACGACAACGACGCTGAGGCGCGAAAGCGTG  
GGGAG  
>ASV:5312:Genus:Distigma  
TCCTTCTTTTCCCTCTTTCTCTTCTTTCTTTTCCCTTCTCTTCTTTTCCCTTCTTCTTTTCCCTTCTTCTTTTCCCTTCA  
TGGGCTCAACCTGTGGACTGCATTGAAACTGTCATCTTACTGAGTGCAGGGGGTAAGCGGAATTCCTAGTGTAGCGGTG  
AAATGCGTAGATATTAGGAGGAACACCCAGTGGCGAAGGCGGCTTACTGGACGTAACGACGTTGAGGCTCGAAAGCGTG  
GGGAG  
>ASV:5313:Order:Betaproteobacteriales  
AACGTAGGGTGCAGCGTTGTCCGGAATTACTGGGTGTAAGGGAGCGCAGGCGGACCGGCAAGTTGGAAGTAAAACCTA  
TGGGCTCAACCCATGAAGTGCATTTGAACTGTAGATCTTACTGAGTGTGGAGGGGCAATCGGAATTCACGCTGTAGCAGTG  
AAATGCGTAGATATTGGAAGAACACCCAGTGGCGAAGGCGGCTTCTGGACATAACGACGCTCAGGCACGAAAGCGTG  
GGGAG  
>ASV:5314:Family:Ruminococcaceae  
TACGGAGGATCCGAGCGTTATCCGGAATTACTGGGTGTAAGGGAGCGTAGGCGGGATGCAAGTCAGATGTGAAAACCTA  
TGGGCTCAACCTGTAGATTGCATTTGAACTGTTGTTCTTACTGAGTGAAGTAGAGGTAGGCGGAATTCCTAGTGTAGCGGTG  
AAATGCGTAGATATTAGGAGGAACATCGGTGGCGAAGGCGGCTTACTGGCACCAACGACGCTGGGCTCGAAAGTGTG  
GGTAG  
>ASV:5315:Genus:CAG-352  
TACGTAGGGAGCGAGCGTTGTCCGATTTACTGGGTGTAAGGGTGCAGGCGGCCAGCAAGTCAGTGTGAAAACCTA  
TGGGCTTAACCTATAACGTCGAATTTGAACTGTCCGGCTTACTGAGTGAAGTAGAGGTAGGCGGAATTCCTAGTGTAGCGGTG  
AAATGCTTAGAGATCATACAGAACACCCGATTGCGAAGGCGGCTTACCAAATATATCTGACGTTGAGGCACGAAAGCGTG  
GGGAG  
>ASV:5316:Family:Lachnospiraceae  
TACGTAGGGGGCAAGCGTTATCCGATTTACTGGGTGTAAGGGAGCGTAGACGCGCGAGCAAGTCTGATGTGAAAGGCA  
GGGGCTTAACCCCTGGACTGCATTGAAACTGCTGTGCTTACTGAGTGCAGGAGGGTAAGCGGAATTCCTAGTGTAGCGGTG  
AAATGCTTAGAGATCATACAGAACACCCGATTGCGAAGGCGGCTTACCAAATATATCTGACGTTGAGGCACGAAAGTGTG  
GGGAG  
>ASV:5317:Family:Ruminococcaceae  
TACGTAGGTGGCAAGCGTTGTCCGATTTACTGGGTGTAAGGGCGTGCAGCCGGTCTGCAAGTCAGATGTGAAATCCA  
TGGGCTCAACCCATGAAGTGCATTTGAACTGTCCGGCTTACTGAGTGAAGTAGAGGTAGGCGGAATTCCTAGTGTAGCGGTG  
AAATGCGTAGAGATCGGGAGGAACACCCAGTGGCAAAGGCGGCTTACTGGGCTTTAACTGACGCTGAGGCACGAAAGCATG  
GGTAG  
>ASV:5318:Genus:UBA1819  
AACGTAGGGTGCAGCGTTGTCCGGAATTACTGGGTGTAAGGGAGCGCAGGCGGATTTGCAAGTTGGGAGTGAAATCTA  
TGGGCTCAACCCATAAATTGCTTTCAAACCTGTCAGTCTTACTGAGTGGTGTAGAGGTAGGCGGAATTCCTAGTGTAGCGGTG  
AAATGCTTAGATATCACGAAGAACCCGATTGCGAAGGCGGCTTACTGGGCTTTAACTGACGCTGAGGCACGAAAGTGTG  
GGTAG  
>ASV:5319:Order:Clostridiales  
TACGTAGGGGGCAAGCGTTATCCGATTTACTGGGTGTAAGGGAGCGTAGGTGGATTGTTAAGTCAGTGTGAAAAGTTT  
GCGGCTCAACCGTAAAATTGCAAGTGAAGTGTGACTGGAGTGCAGGAGAGGTAAAGCGGAATTCCTAGTGTAGCGGTG  
AAATGCGTAGATATTAGGAGGAACACCCAGTGGCGAAGGCGGCTTCTGGACGACAACGACGCTGAGGCGCGAAAGTGTG  
GGGAG  
>ASV:5320:Order:Clostridiales  
TACGTAGGTGCAAGCGTTGTCCGGAATTACTGGGTGTAAGGGAGCGTAGGCGGATTTTAAAGTGAAGTGTGAAATATA  
CGGGCTTAACCTGAGTGTGCTGATTTCAAACCTGGAAGTCTAGAGTGCAGGAGAGGAGAAGGGAATTCCTAGTGTAGCGGTG  
GAATGTGTAGATATCGGGAGGAACACCCAGTGGCGAAGGCGGCTTACTGGCACCAACTGACGCTGAGGCTCGAAAGTGTG  
GGTAG  
>ASV:5321:Family:Clostridiaceae\_1  
TACGTAGGTGGCGAGCGTTGTCCGATTTACTGGGCGTAAAGGGAGCGTAGGCGGATTTTAAAGTGAAGTGTGAAATATA  
CGGGCTTAACCTGAGTGTGCTGATTTCAAACCTGGAAGTCTAGAGTGCAGGAGAGGAGAAGGGAATTCCTAGTGTAGCGGTG  
GAATGCGTAGATATCGGGAGGAACACCCAGTGGCGAAGGCGGCTTACTGGCACCAACTGACGCTGAGGCTCGAAAGCGTG  
GGGAG



>ASV:5322:Genus:Acetatifactor  
TACGTAGGGGGCGGGGTTATCCGGATTCCTGGGTGTAAAGGGAGCGTAGACGGCCGTGCAAGCCAGGAGTGAAAGCCC  
GGGGCCAACCCGGGACTGCTCTTGGAACTGTGCGCTGGAGTGCGGGAGGGGAGCGGGAATTCCTGGTGTAGCGGTG  
AAATGCGTAGATATCAGGAGGAACACCGCGCGCAAGGCGGCTGCTGGACCGGACCGACGCTGAGGCTCGAAAGTGTG  
GGTAG

>ASV:5323:Family:Muribaculaceae  
TACGGAGGATGCGAGCGTTATCCGGATTTATTGGGTTTAAAGGGTGCCTAGGCGGACTGTTAAGTCAGCGGTAAGAGCCC  
GGGGCTCAACCCGGGACTGCTTTTAACTGGTGTCTTGGATGTCGAGAGGTATGCGGAATGCGCAGTGTAGCGGTGA  
AATGCTTAGATATTGCGCAGAACTCCGATTGCGAAGGCAGCATAACCGCGGCGATCTGACGCTGAGGCACGAAAGCGTGG  
GTATC

>ASV:5324:Family:Lachnospiraceae  
AACGGAGGATCCGAGCGTTATCCGGATTTATTGGGTTTAAAGGGAGTGTAGGTGGTATCACAAGTCAGAAGTGAAGAGCCC  
GGGGCTCAACCCGGGACTGCTTTTAACTGGTGTGGAAGTGGAGTGCGGGAGAGGTAAGTGAATTCCTAGTGTAGCGGTG  
AAATGCGTAGATATGTGAAGAACACCGATGCGAAGGCAGCCTCTGGGACATAACTGACGCTCAGGCACGAAAGCGTG  
GGGAG

>ASV:5325:Family:Veillonellaceae  
AACGTAGGTACAAGCGTTGTCCGGAATTACTGGGTGTAAAGGGAGCGCAGGCGGATCAGTTAGTCTGTCTTAAAGTTT  
GGGGCTTAACCCGGGACTGCTTTTAACTGGTGTGGAAGTGGAGTATCGGAGAGGGAAGTGAATTCCTAGTGTAGCGGTGA  
AATGCGTAGATATTAGGAAGAACACCGATGCGAAGGCAGCCTCTGGGACATAACTGACGCTCAGGCACGAAAGCGTGG  
GTAGC

>ASV:5326:Genus:Terrisporobacter  
TACGTAGGGGGCTAGCGTTATCCGGATTTACTGGGCGTAAAGGGTGCCTAGGTGGTCTCTTAAGTCAGGAGTGAAGAGCC  
ACGGCTTAACCCGGGACTGCTTTTAACTGGTGTGGAAGTGGAGTGCAGGAGAGGAAAGTGAATTCCTAGTGTAGCGGTGA  
AATGCGTAGATATTAGGAAGAACACCGATGCGAAGGCAGCCTCTGGGACATAACTGACGCTCAGGCACGAAAGCGTGG  
GGAGC

>ASV:5327:Family:Muribaculaceae  
TACGGAGGATCCGAGCGTTATCCGGATTTATTGGGTTTAAAGGGAGCGTAGGCGGCTCTTAAGTAAGCGGTAAATCCG  
GGGGCTCAACCCGGGACTGCTTTTAACTGGTGTGGAAGTGGAGTGCAGGAGAGGTAAGTGAATTCCTAGTGTAGCGGTGA  
AATGCTTAGATATCAGGAAGAACTCCGATTGCGAAGGCAGCTTACTAACCTGTAAGTACGCTGATGCTCGAAAGTGTGG  
GTATC

>ASV:5328:Genus:Sanguibacteroides  
CACGGGGATGCGAGCGTTATCCGGATTTATTGGGTTTAAAGGGAGCGTAGGCGGCCGACAAGTCAGCGGTAAAGACT  
GCAGCTAAACTGTAGCACGCGTTTAACTGTGCGGCTAGAGTGCAGACGAGTTGGCGGAACAGGAGAAAGTGCAGCGTGA  
AATGCATAGATATCACGGAAGCCGACAGCGAAGGCAGCTGACCAGGCTGTAAGTACGCTGATGCTCGAGAGCGTGG  
GTAGC

>ASV:5329:Phylum:Firmicutes  
TACGGAGGATCCGAGCGTTATCCGGATTTATTGGGTTTAAAGGGAGCGTAGACGGACTGGCAAGTCTGATGTGAAGGGCG  
GGGGCTCAACCCCTGGACTGCATTGGAAGTGTAGTCTTGGAGTGCAGGAGAGGTAAGCGGAATTCCTAGTGTAGCGGTG  
AAATGCGTAGATATTGGGAGGAACACCGATGCGAAGGCAGCCTTCTGGACTGTGCTGACGCTGAGATGCGAAAGCCAG  
GGTAG

>ASV:5330:Order:Bacteroidales  
TACGTAGGGGGCAAGCGTTATCCGGATTTATTGGGTTTAAAGGGAGCGTAGACGGCAAGGCAAGTCTGATGTGAAAACCC  
AGGGCTTAACCTTTGGGACTGCTTTTAACTGTGAGTGCAGGAGAGGTAGGCGGAATTCCTGGTGTAGCGGTG  
AAATGCTTAGATATCAGGAAGAACTCCGATTGCGAAGGCAGCCTGCTAAGTGCACGCTGAGGCTCGAAAGTGTG  
GGTAT

>ASV:5331:Genus:Christensenellaceae\_R-7\_group  
TACGTAGGGGGCGAGCGTTGTCCGGAATGACTGGGCGTAAAGGGCGCTAGGCGGCTCGGTAAGTTAGAAGTGAAGTCC  
CGTTTTCAAGGTGGGAATTGCTTTTAACTGTGCGGCTTGGAGTGCAGAAAGAGGTAAGCGGAATTCAGTGTAGCGGTG  
AAATGCGTAGAGATTTGGAAGAACACCGATGCGAAGGCAGCCTTACTGGGCTGTAAGTACGCTGAGGCGCGAAAGCGTG  
GGGAG

>ASV:5332:Species:circulans/massiliosenegalensis  
TACGTAGGTGGCAAGCGTTGTCCGGAATTTATTGGGCGTAAAGCGCGCAGGCGGTTCTTAAGTCTGATGTGAAAGCCC  
CCGGCTCAACCCGGGAGGTTATTGGAAGTGGGAACTTGGTGTGAGTGCAGAAAGAGAGCGGAATTCACGCTGTAGCGGTG  
AAATGCGTAGAGATGTGGAGGAACACCGATGCGAAGGCAGCCTTCTGGTCTGTAAGTACGCTGAGGCGCGAAAGCGTG  
GGGAG

>ASV:5333:Genus:Ruminococcaceae\_UCG-003  
TACGTAGGTGGCAAGCGTTGTCCGGAATTTACTGGGTTTAAAGGGCGTGCAGCCGGCATGCAAGTCAGATGTGAAATCTC  
AGGGCTTAACCTGAACTGCATTTGAACTGTATGTCTTGGAGTGCAGGAGAGGTAAGCGGAATTCCTGTGTAGCGGTG  
AAATGCGTAGATATCAGGAAGAACTCCGATTGCGAAGGCAGCCTGCCAGACCACGACTGACGCTCATGCTCGAAAGTGG  
GGTAT

>ASV:5334:Kingdom:Bacteria  
TACGGAGGATCCGAGCGTTATCCGGATTTATTGGGTTTAAAGGGAGCGTAGATGGATGGACAAGTCTGATGTGAAAGGCT  
GGGGCTCAACCCGGGACTGCATTGGAAGTGCCTGCTTGGAGTGCAGGAGAGGTAAGCGGAATTCAGGTGTAGCGGTG  
AAATGCGTAGAGATCTGGAGGAATACCGGTGCGAAGGCAGCCTTGGACGAAGACTGACGCTCGGGTGCAGAAAGCGTG  
GGGAG

>ASV:5335:Genus:Catabacter  
TACGTAGGGAGCAAGCGTTGTCCGGAATTTACTGGGCGTAAAGGGTGCCTAGGTGGCCATGTAAGTCAGGTGTGAAAGACC  
GGGGCTCAACCCGGGTTGCACTTGAAGTGTGTGGCTTGGAGTACAGGAGAGGGAAGTGAATTCCTAGTGTAGCGGTG



TACGGAGGATCAAGCGTTATCCGGATTTATTGGGTTAAAGGGTGCCTAGCCGGGAAGGCAAGTCAGATGTGAAATCCA  
CGGGCTTAACCTCGTGAAGTGCATTTGAAACTACTTTTCTTGAGTATCGGAGAGGCAATCGGAATTCCTAGTGTAGCGGTG  
AAATGCGTAGATATTAGGAGGAACACCAGTAGCGAAGGCAGCTCACTAGACTGTTACTGACACTGAGGCTCGGAAGTGTG  
GGTAT

>ASV:5350:Genus:Candidatus\_Soleaferrea

TACGTAGGTCAAGCGTTGTCCGGATTTATTGGGTGTAAAGGGAGGTAGGCGGGATCATAAGTTGCGTGTGAAATGCA  
GGGGCTCAACCCCTGAAGTGCAGCGCAAAACTGTGGTCTTGAGTGAAGTAGAGGCAGGCGGAATTCCTGTGTAGCGGTG  
AAATGCGTAGATATACGAGGAACACCAGTGGCGAAGGCGCCTGCTGGACATTAACGACGCTGAGGCGCAAAAGCGTG  
GGTAG

>ASV:5351:Order:Bacteroidales

AACGTAGGGTCAAGCGTTGTCCGGATTTATTGGGTGTAAAGGGAGCGTAGGCGGGATGCCAAGTCAGCTGTGAAAACCTA  
TGGGCTTAACCCGTAGACTGCAGTTGAAACTGGTATTCTTGAGTGAAGTAGAGGTTGGCGGAATTCCTGGTGTAGCGGTG  
AAATGCTTAGATATCACGAAGAACCCTGATTGCGAAGGCAGCTTCTGACTGTAACGACGCTGATGCTCGAAAGTGTG  
GGTAT

>ASV:5352:Family:Lachnospiraceae

TACGTAGGTGCAAGCGTTGTCCGGATTTATTGGGTGTAAAGGGAGCGTAGGCGGGATGCCAAGTCAGCTGTGAAAACCTA  
TGGGCTTAACCCGTAGACTGCAGTTGAAACTGTCAGACTGGAGTGCAGGAGAGGTAAGCGGAATTCCTAGTGTAGCGGTG  
AAATGCGTAGATATTAGGAGGAACATCAGTGGCGAAGGCGGCTTACTGACTGAAACTGACACTGAGGCACGAAAGCGTG  
GGGAG

>ASV:5353:Genus:Fusobacterium

TACGGAGGATCCGAGCGTTATCCGGATTTATTGGGCGTAAAGCGCGTCTAGGTGGTTATGTAAGTCTGATGTGAAAATGC  
AGAGCTCGACTCTGTATTGCGTTGGAAACTGTATAACTAGAGTACTGGAGAGGTAAGCGGAACTACAAGTGTAGAGGTGA  
AATTCGTAGATATTTGTAGGAATGCCGATGGGGAAGCCAGCTTACTGGACAGATACTGACGCTAAAGCGCAAAAGCGTGG  
GTAGC

>ASV:5354:Family:Ruminococcaceae

TACGTAGGGTCAAGCGTTATCCGGATTTATTGGGTGTAAAGGGAGCGCAGGCGGGAAGACAAGTTGGAAGTGAAATCTA  
TGGGCTCAACCATAAACTGCTTTCAAACCTGTTTTCTTGAGTAGTGCAGAGGTAGGCGGAATTCCTGGTGTAGCGGTG  
GAATGCGTAGATATCACGCAGAACCCTGATTGCGAAGGCAGCCTGCTAGGGTGAACAGACGCTGAGGCACGAAAGCGTG  
GGGAG

>ASV:5355:Phylum:Firmicutes

TACGTAGGGTCAAGCGTTATCCGGATTTATTGGGCGTAAAGAGCGCGCAGGTGGTTGATTAAGTCTGATGTGAAAGCCC  
ACGGCTTAACCGTGGAGGGTCAATGGAAACTGGGAACTTGGAGTGCAGGAGAGGAGAGTGGAAATTCCTAGTGTAGCGGTG  
AAATGCGTAGATATTAGGAGGAACACCAGTTGCGAAGGCAGCCTCTGACTGTAACGACGCTGATGCTCGAAAGTGTG  
GGTAT

>ASV:5356:Genus:Bilophila

TACGGAGGGTCAAGCGTTAATCGGAATCGTGGGCGTAAAGCGCACGTAGGCGGCTTGGTAAGTCAGGGGTGAAATCCC  
ACAGCCCAACTCGGAAGTGGTCTTGGAACTGTTAACTTGGAGTACCAGGAGAGGTAAGCGGAATTCCTGGTGTAGCGGTG  
AAATGCTTAGATATCACGAAGAACCCTGATTGCGAAGGCAGCTCACTAGACTGTTACTGACACTGATGCTCGAAAGTGTG  
GGTAT

>ASV:5357:Order:Clostridiales

TACGTAGGTCCCGAGCGTTATCCGGATTTATTGGGCGTAAAGCGAGCGCAGGCGGCTAGATAAGTCTGAAGTTAAAGGCT  
GTGGCTTAACCATAGTACGCTTTGGAACTGTTAACTTGGAGTACCAGGAGGGTAAGCGGAATTCCTAGTGTAGCGGTG  
AATGCGTAGATATTAGGAGGAACACCAGTGGCGAAGGCGGCTTACTGGACGATAACTGACACTGATGCTCGAAAGTGTG  
GTATC

>ASV:5358:Genus:Deinococcus

TACGGAGGGTCAAGCGTTACCCGGAATCACTGGGCGTAAAGGGCGTGTAGGCGGAAGGTTAAGTCCGACTTTAAAGACC  
GAGGCTCAACCTCGGAAGTGGTCTTGGAACTGTTAACTTGGAGTACCAGGAGAGGTAAGCGGAATTCCTGGTGTAGCGGTG  
GAATGCGTAGATACCAGGAGGAACACCAGTGGCGAAGGCAGGTTCTTGGACAGAAGGTGACGCTGAGGCGCAAAAGTGTG  
GGGAG

>ASV:5359:Genus:Corynebacterium\_1

TACGTAGGGTCAAGCGTTGTCCGGATTTATTGGGCGTAAAGAGCTCGTAGGTGGTTTGTACGCTGCTGTGAAATCC  
ACAGCTTAACCTGTGGGTGTGCAGGCGATACGGGCTGACTTGAGTACTGTAGGGTAAGTGGAAATTCCTGGTGTAGCGGTG  
AAATGCGCAGATATCAGGAGGAACACCAGTGGCGAAGGCAGGTTACTGGCAGTTACTGACGCTGAGGAGCGAAAGCATG  
GGTAG

>ASV:5360:Order:Bacteroidales

TACGGAGGATCCGAGCGTTATCCGGATTTATTGGGTTAAAGGGAGCGTAGACGTTTTGCAAGTCTGAAGTGAAGGCC  
GGGGCTTAACCCCGGACTGCTTTGGAAACTGTAGAAGTACTGAGTGCAGGAGAGGTAAGTGGAAATTCCTAGTGTAGCGGTG  
AAATGCTTAGATATCACGAAGAACCCTGATCGCAAGGCATTGTGCCGGGCAGCACTGACGCTGAGGCTCGAAAGTGTG  
GGTAT

>ASV:5361:Order:Selenomonadales

TACGGAGGATCCGAGCGTTATCCGGATTTATTGGGTGTAAAGGGCGTGCAGCCGGGCATGCAAGTCAGATGTGAAATCTC  
AGGGCTTAACCTGAAACTGCATTTGAAACTGTATGCTTGAGTGCAGGAGAGGAAAGGGGAATTCAGTGTAGCGGTG  
AAATGCGTAGATATTGGGAGGAACACCAGTGGCGAAGGCGCCTTCTGGACTGTGCTGACGCTGAGATGCGAAAGCCAG  
GGTAG

>ASV:5362:Species:naviforme/nucleatum

TACGTATGTCACGAGCGTTATCCGGATTTATTGGGCGTAAAGCGCGTCTAGGTGGTTATGTAAGTCTGATGTGAAAATGC  
AGGGCTCAACTCTGTATTGCGTTGGAAACTGTATAACTAGAGTACTGGAGAGGTAAGCGGAACTACAAGTGTAGAGGTGA  
AATTCGTAGATATTTGTAGGAATGCCGATGGGGAAGCCAGCTTACTGGACAGATACTGACGCTGAAGCGCAAAAGCGTGG

GTAGC

>ASV:5363:Family:Muribaculaceae

TACGGAGGATCGAGCGTTATCCGGATTTATTGGGTTTAAAGGGTGCCTAGGCGGATTTTAAAGTCAGCGGTAAAATGTC  
CGGGCTCAACCCGGGCCGGCCGTTGAAACTGGGGATCTTGAGTGGGCAGAAAGTATGCGGAATGCGTGGTGTAGCGGTGA  
AATGCATAGATATCACGCAAGACTCCGATTGCGAAGGCAGCATAACCGGCCCCGACTGACGCTGAGGCACGAAAGCGTGG  
GGATC

>ASV:5364:Family:Veillonellaceae

TACGTAGGGGGCAAGCGTTATCCGGATTTATTGGGCGTAAAGGGAGCGCAGGTGGGAAAATAAGTCTGTTTTAAAGTGC  
GGGGCTCAACCCGTTGATGGAATGAAACTGTTTTCTTGAGTGCAGGAGAGAAAGTGAATTCCTAGTGTAGCGGTGA  
GATGCGTAGATATTAGGAGAACACCAAGTGGCGAAGGCGCCTACTGGGCACAACTGACGCTGAGGCTCGAAAGCATGG  
GTAGC

>ASV:5365:Genus:Pediococcus

TACGTATGGTGCAGCGTTATCCGGATTTATTGGGCGTAAAGCGAGCGCAGGCGGTCTTTAAAGTCTAATGTGAAAGCCT  
TCGGCTCAACCGAAGAAGTGCATTGAAACTGGGAGACTTGAGTGCAGAGGAGGACAGTGAATCCATGTGTAGCGGTG  
AATGCGTAGATATATGGAAGAACACCAAGTGGCGAAGGCGGCTGTCTGGTCTGTAACGACGCTGAGGCTCGAAAGCATG  
GGTAG

>ASV:5366:Genus:Dielma

TACGTAGGGTGCAGCGTTATCCGGATTTACTGGGCGTAAAGGGTGCCTAGGCGGTGCGATAAGTCTGAGGTAAAAGGTT  
ACAGCTCAACTGCAATACGCCCTTGAAACTGTGCGACTAGAGTGCAGGAGAGGGCAATGGAATTCATGTGTAGCGGTAA  
AATGCGTAGATATATGAGGAACACCAAGTGGCGAAGGCGGTTGCCTGGCCTGTAACGACGCTGAAGCACGAAAGCGTGG  
GGAGC

>ASV:5367:Order:Bacteroidales

TACGGAGGATCCGAGCGTTATCCGGATTTATTGGGTTTAAAGGGAGCGTAGGCGGACGCTTAAAGTCAAGTGTGGAAGTTT  
GCGGCTCAACCGTAAAATTGCAAGTGTACTGGGTGCTTGAGTACAGTAGAGGTAGGCGGAATGTATGGTGTAGCGGTG  
AATGCTTAGAGATCATAACAGAACACCGATTGCGAAGGCAGCTTACCAAATATATCTGACGTTGAGGCACGAAAGCGTG  
GGGAG

>ASV:5368:Family:Ruminococcaceae

TACGTAGGGGGCAAGCGTTATCCGGATTTACTGGGTGTAAGGGAGCGCAGGCGGGAAGACAAGTTGGAAGTAAAATCTA  
TGGGCTCAACCCATAAACTGCTTTCAAACCTGTTTTCTTGAGTATCGGAGAGGCAATCGGAATTCCTAGTGTAGCGGTG  
AATGCGTAGATATTAGGAGAACACCGTGGCGAAGGCGGCTTTCTGGACTGTAACGACGCTGAGGTACGAAAGCGTG  
GGGAG

>ASV:5369:Genus:Paeniclostridium

TACGTAGGGGGCTAGCGTTATCCGGATTTACTGGGCGTAAAGGGTGCCTAGGCGGTCTTTCAAGCCAGAAGTAAAAGGCT  
ACGGCTCAACCGTAGTAAGCTTTTGAAGTGTAGGACTTGAGTGCAGGAGAGGAGAGTGAATTCCTAGTGTAGCGGTGA  
AATGCGTAGATATGTGAAGAACACCGATTGCGAAGGCAGCCTGCTGGACTGTAACGACGCTGAAGCTCGAAAGTGGCG  
GTATC

>ASV:5370:Order:Clostridiales

TACGTATGGTGCAGCGTTATCCGGATTTACTGGGTGTAAGGGTGCCTAGGTGGTTTCTTAAGTCAAGGTAAAAGGCT  
ACGGCTCAACCGTAGTAAGCTTTGAAACTGACAGCCTTGAGTATCGGAGAGGAAAGCGGAATTCCTAGTGTAGCGGTGA  
AATGCGTAGATATTAGGAGAACACCAAGTGGCGAAGGCGGCTTTCTGGACGCAACTGACGCTGAGGCTCGAAAGCGTGG  
GGAGC

>ASV:5371:Family:Lachnospiraceae

TACGTAGGGGGCAAGCGTTATCCGGATTTACTGGGTGTAAGGGAGCGTAGACGGGAGACAAGTCCGAAGTAAAAGCCC  
GGGGCTCAACCCGGGACTGCTTTGAAACTGCCTTGCTAGAGTGCCTGGAGAGGTAAGTGAATTCCTAGTGTAGCGGTG  
AATGCTTAGATATACGAAGAACCTCCGATTGCGAAGGCAGCATACTGGGGTAAAACAGACGCTGAAGCACGAAAGCGTG  
GGTAT

>ASV:5372:Genus:Lachnospiraceae\_FE2018\_group

TACGGAAGGTCCGGCGTTATCCGGATTTACTGGGTGTAAGGGAGCGTAGACGGCTGTGCAAGTCTGAAGTAAAAGGCA  
TGGGCTCAACCCATAGACTGCATTTGAAACTGTTGTTCTTGAGTGAAGTAGAGGTAAGCGGAATTCCTGGTGTAGCGGTG  
AATGCGTAGAGATCAGGAGAACATCGTGGCGAAGGCGGCTTGCTGGACGGTAACGACGTTGAGGCTCGAAAGCGTG  
GGGAG

>ASV:5373:Genus:Lactococcus

TACGGAGGATCCGAGCGTTGTCGGATTTATTGGGCGTAAAGCGAGCGCAGGTGGTTTATTAAGTCTGGTGTAAAAGGCA  
GTGGCTCAACCATTTGATGCAATGGAAGTGGTAGACTTGAGTGCAGAGAGGAGAGTGAATTCATGTGTAGCGGTGA  
AATGCGTAGATATATGAGGAACACCGGTGGCGAAGGCGGCTCTCTGGCCTGTAACGACACTGATGCTCGAAAGTGTGG  
GTATC

>ASV:5374:Family:Prevotellaceae

TACGGAAGGTCCGGCGTTATCCGGATTTATTGGGTTTAAAGGGAGCGTAGGCCGGAGATTAAGCGTGTGTGAAATGTA  
GGCGCTCAACCTCTGCACTGCAGCGCAACTGGCAGACTTGAGTGCAGGGAAGTAGCGGAATTCCTCGTGTAGCGGTG  
AATGCTTAGATATGACGAAGAACCTCCGATTGCGAAGGCGGCTGCTGGACGCAACTGACGCTGAGGCGGAAAGCGTG  
GGGAG

>ASV:5375:Order:Clostridiales

TACGTAGTCCCAGCGTTGTCGGATTTACTGGGTGTAAGGGAGCGTAGGCCGGAAGGCAAGTTGATTGTCTAAACTA  
TCGGCTCAACTGATAGTCCGATCAAACTACTTTTTCTTGAGTGAAGTAGAGGTAAGCGGAATTCCTAGTGTAGCGGTGA  
AATGCGTAAATATCTGGAAGAACCAAAAGGCGAAGGCAGTCTCTGGGCAATACTGACGCTCATATGCGAAAGCGTGG  
GTAGC

>ASV:5376:Genus:Holdemanelle

TACGTAGGTGGCGAGCGTTATCCGGATGATTGGGCGTAAAGGGTGCATAGGTGGCAGAACAAAGTCTGGAGTAAAAGGTA

TGGGCTCAACCGTACTGGCTCTGAAACTGTTCAGCTAGAGAACAGAAGAGGACGGCGGAACCTCATGTGTAGCGGTGA  
AATGCGTAGATATTAGGAGGAACACCCAGTGGCGAAGGCGGCTTACTGGACAGTAACTGACGTTGAGGCTCGAAAGCGTGG  
GGAGC

>ASV:5377:Genus:Odoribacter

TACGGAGGATGCGAGCGTTATCCGGATTTATTGGGTTTAAAGGGTGCCTAGGCGGTTTATTAAGTTAGTGGTTAAATATT  
TGAGCTAAACTCAATTGTGCCATTAATACTGGTAAACTGGAGTACAGACGAGGTAGGCGGAATTAAGTTAAGTAGCGGTGA  
AATGCATAGATATGACGAAGAACCCTGATTGCGAAGGCAGCTGCTAGGGTGCACAGACGCTGAAGCTCGAAAGCGTGG  
GTATC

>ASV:5378:Genus:Prevotella\_6

TACGGAGGATCCGAGCGTTATCCGGATTTATTGGGTTTAAAGGGAGTGTAGGCGGCCTGTTAAGCGTGTGTGAAATGTA  
GATGCTCAACATCTGAACTGCAGCGCAACTGGCTGGCTTGGAGTACAGCAACGTTGGCGGAATTCATGGTGTAGCGGTG  
AAATGCTTAGATATCATGAAGAACCCTATTGCGAAGGCAGCTTACTAAACCATAACTGACACTGAAGCACGAAAGCGTG  
GGGAT

>ASV:5379:Genus:UBA1819

AACGTAGGGTGAAGCGTTGTCCGGAATTACTGGGTGTAAGGGAGCGAGGCGGATTGGCAAGTTGGGAGTAAATCTA  
TGGGCTCAACCCATAAATTGCTTTCAAACCTGTCAGTCTTGGAGTGTAGAGGTAGGCGGAATTCCTGGTGTAGCGGTG  
AAATGCTTAGATATCACGAAGAACCCTGATTGCGAAGGCAGCTCACTGGAGTGAACGACGCTGATGCTCGAAAGTGTG  
GGTAT

>ASV:5380:Order:Bacteroidales

TACGGAAAGTCCGGGCTTATCCGGATTTATTGGGTTTAAAGGGTGCCTAGACGGGAAATTAAGTTAGTTGTGAAATCCC  
TCGGCTTAACTGAGGAACTGCAACTAAAACCTGATTTTCTTGGAGTGTGGAGAGGAAAGTGGAAATTCCTAGTGTAGCGGTG  
AAATGCTTAGATATCACGAAGAACCCTGATTGCGAAGGCAGCTGCTAAGCTGCAACTGACATTGAGGCTCGAAAGTGTG  
GGTAT

>ASV:5381:Genus:Ruminococcaceae\_UCG-011

TACGTAGGTGGCAAGCGTTGTCCGGAATTACTGGGTGTAAGGGTGCCTAGGCGGCTTCTAAAGTCAGATGTGAAATACC  
GCAGCTCAACTGCGGGCTGCATTTGAAACTTGGGAGCTTGGAGTGAAGTAGAGGTAAGCGGAATTCCTAGTGTAGCGGTG  
GAATGCGTAGATATTAGGAGGAACACCAGTGGCGAAGGCAGCTCACTGGGCACCAACTGACGCTGAGGCTCGAAAGCATG  
GGTAG

>ASV:5382:Family:Family\_XIII

TACGTAGGGGGCGAGCGTTATCCGGATTTATTGGGCTAAAGAGTGCCTAGGTGGCTTTTTAAGCGCAGGGTTTAAAGGCA  
ATGGCCCAACCATTTGTCGCCCTGCGAACTGGAAGGCTTGGAGTGCAGGAGAGGAAAGCGGAATTCCTGGTGTAGCGGTGA  
AATGCGTAGATATCATGAAGAACCCTGATTGCGAAGGCAGCTTACTGGAGTGAACGACGCTGAAGCTCGAAAGCGCGG  
GTATC

>ASV:5383:Family:Ruminococcaceae

TACGTAGGTGGCAAGCGTTGTCCGGAATTACTGGGTGTAAGGGAGCGTAGGCGGGAAGGCAAGTTCGATTGTCTAAACTA  
TGGGCTCAACCCATAGTCGGATCGAAACTGTCTTTCTTGGAGTGAAGTAGAGGTAAGCGGAATTCCTAGTGTAGCGGTGA  
AATGCGTAAATATTAGGAGGAACACCAGTGGCGAAGGCGGCTTACTGGGCTTTAACTGACGCTGAGGCTCGAAAGCGTGG  
GTAGC

>ASV:5384:Genus:GCA-900066575

TACGTAGGGGGCAAGCGTTATCCGGATTTACTGGGTGTAAGGGAGCGTAGGCGGTCAGGCAAGTCAGAAGTGAAAGCCC  
GCAGCTTAACTGCGGACTGCTTTTGAACCTGTCAGACTGGATTGCAGGAGAGGTAAGCGGAATTCCTAGTGTAGCGGTG  
AAATGCGTAGATATTAGGAGGAACACCAGTGGCGAAGGCGGCTTACTGGACTGTAATGACGCTGAGGCTCGAAAGCGTGG  
GGAG

>ASV:5385:Family:Lachnospiraceae

AACGTAGGTCAACAGCGTTGTCCGGAATTACTGGGTGTAAGGGAGCGCAGGCGGGAAGACAAGTTGGAAGTGAAATCTA  
TGGGCTCAACCCGGAAGTGTCTTTGAAACTGTAAGGCTGGAGTGCAGGAGGGGTGAGTGGAAATTCCTAGTGTAGCGGTG  
AAATGCGTAGATATTAGGAGGAACACCAGTGGCGAAGGCGGCTCACTGGACTGTAACGACACTGAGGCTCGAAAGTGTG  
GGTAG

>ASV:5386:Genus:GCA-900066225

TACGGAGGTGGCAAGCGTTGTCCGGAATTACTGGGTGTAAGGGAGCGTAGGCGGGAAGACAAGTTGAATGTTTAAACTA  
TCGGCTTAAACCGGTAGTCGCTTCAAACCTGTTTTCTTGGAGTGAAGTAGAGGCAAGCGGAATTCCTTGTGTAGCGGTGA  
AATGCGTAGATATTAGGAGGAACACCAGTGGCGAAGGCGGCTTCTGGACGAAAACCTGACGCTGAGGCGGAAAGCGTGG  
GGAGC

>ASV:5387:Genus:Bacteroides

TACGTAGGTGGCAAGCGTTATCCGGATTTACTGGGTGTAAGGGTGCCTAGGTGGTGAATTAAGTCAGCGGTGAAAGTTT  
GTGGCTCAACCATAAATGCGCTTGAATACTGGTGTCTTGGAGTACAGTAGAGGTGGCGGAATTCGTGGTGTAGCGGTG  
AAATGCTTAGATATCACGAAGAACCCTGATTGCGAAGGCAGCTCACTGGACTGCAACTGACACTGATGCTCGAAAGTGTG  
GGTAT

>ASV:5388:Kingdom:Bacteria

TACGTAGGGGGCAAGCGTTATCCGGATTCATTGGGCGTAAAGGGTGCAGGCGGTTGAGTAAGACAGATGTGAAATCCC  
CGAGCTTAACTCGGGAATGGCATATGTGACTGCTCGACTAGAGTGTGTCAGAGGTAGATGGAATTCCTGGTGTAGCGGTG  
GAATGCGTAGATATCGGAGGAACACCAGTGGCGAAGGCGGCTTACTGGGCACCAACTGACGCTGAGGCTCGAAAGCATG  
GGTAG

>ASV:5389:Family:Ruminococcaceae

TACGTAGGTGGCAAGCGTTGTCCGATTTACTGGGTGTAAGGGCGCGTAGGCGGTTAGGCAAGTCAGATGTGAAATACC  
GGGGCTTAACTCTGGGCTGCAATTTGAAACTGTTTTATCTTGGAGTATCGGAGAGGCGAGCGGAATTCCTAGTGTAGCGGTG  
AAATGCGTAGATATTAGGAGGAACACCAGTGGCGAAGGCGGCTGCTGGACGACAACCTGACGCTGAGGCGGAAAGCGTG  
GGGAG

>ASV:5390:Family:Lachnospiraceae  
TACGTAGGGGGCAAGCGTTATCCGGATTTACTGGGTGTAAGGGAGCGTAGACGGATGGACAAGTCTGAAGTGAAAGCCC  
GGGGCTCAACCCGGGACTGCTTTGAAACTATGCAGCTAGAGTGTGCGAGAGGTAAGTGAATTCCCAGTGTAGCGGTG  
AAATGCGTAGATATTGGGAGGAACACCAAGTGGCGAAGGCGGCTTACTGGACTGAAACTGACACTGAGGCACGAAAGTGTG  
GGGAG

>ASV:5391:Genus:Planococcus  
TACGTAGGTGGCAAGCGTTGTCCGGAATTATTGGGCGTAAAGCGCGCAGGCGGCTCTTAAAGTCTGATGTGAAAGCCC  
ACGGCTCAACCGTGGAGGCTGATTGAAACTGGAGGACTTGTAGTGCAGAAGAGGAAAGTGAATTCCATGTGTAGCGGTG  
AAATGCGTAGAGATGTGGAGGAACACCAAGTGGCGAAGGCGACTTTCTGGTCTGTAAGTACACTGAGGCAGGCGAAAGCGTG  
GGGAG

>ASV:5392:Genus:Lachnospiraceae\_NK4A136\_group  
TACGTAGGGGGCAAGCGTTATCCGGATTTACTGGGTGTAAGGGAGCGTAGACGGCTGTGCAAGTCTGAAGTGAATGCC  
GGGGCCCAACCCGGGACTGCTTTGAAACTGTACAGCTAGAGTGCAGGAGGGGTGAGCGGAATTCCTAGTGTAGCGGTG  
AAATGCGTAGATATTAGGAGGAACACCGTGGCGAAGGCGGCTCACTGGACTGTAAGTACACTGAGGCTCGAAAGCGTG  
GGGAG

>ASV:5393:Family:Ruminococcaceae  
TACGTAGGATGCGAGCGTTATCCGGAATTACTGGGTGTAAGGGAGCGCAGGCGGACTGCAAGTTGGATGTGAAATACC  
GCAGCTTAACCTGCGGAGCTGCATCCAAAAGTGTAGTCTTGGAGTGCAGGAGAGGCAAGCGGAATTCAGTGTAGCGGTG  
AAATGCGTAGATATTGCGAGGAACACCAAGTGGCGAAGGCGGCTTCTGGTCTGTAAGTACACTGAGGCTCGAAAGTGTG  
GGGAG

>ASV:5394:Genus:Ruminococcaceae\_UCG-009  
TACGTAGGTGGCGAGCGTTATCCGGATTTACTGGGTGTAAGGGCGAGTAGGCGGATAGCAAGTCAAGTGTGAAATACC  
GGGGCTCAACCTCGGAGCTGCATTTGAAACTGTTATTCTTGGAGTGGTGGAGAGGCAAGCGGAATTCAGTGTAGCGGTG  
GAATGCATAGATATCGGAGGAACACCAAGTGGCGAAGGCGGCTTCTGGACTAAGTACACTGAGGCTCGAAAGCGTG  
GGGAG

>ASV:5395:Family:Lachnospiraceae  
TACGTAGGGGGCAAGCGTTATCCGGAATTACTGGGTGTAAGGGAGCGTAGACGGCAAGGCAAGCCAGAAGTGAAGGGC  
AGGGCTCAACCTGACATGCTTTGAAACTGTTGGTCTAGAGTGCAGGAGAGGTAAGTGAATTCCAGTGTAGCGGTG  
AAATGCGTAGATATTAGGAGGAACACCAAGTGGCGAAGGCGGCTTACTGGACTGTAAGTACACTGAGGCTCGAAAGCGTG  
GGGAG

>ASV:5396:Genus:Gemella  
TACGTAGGTGGCAAGCGTTGTCCGGAATTATTGGGCGTAAAGGGCGCGCAGGTGGTTAATAAGTCTGATGTGAAAGCCC  
ACGGCTCAACCGTGGAGGCTATTGAAACTGTTAAACTTGGAGTGCAGGAGAGAAAAGTGAATTCCAGTGTAGCGGTG  
AAATGCGTAGAGATTAGGAGGAACACCAAGTGGCGAAGGCGGCTTCTGGACGACAAGTACACTGAGGCTCGAAAGCGTG  
GGGAG

>ASV:5397:Family:Christensenellaceae  
TACGTAGGGAGCGAGCGTTGTCCGGAATTATTGGGCGTAAAGGGTGCCTAGGCGGTTTTTAAAGTCAAGTGTGAAATACC  
CGGGCTTAACCCGGGGGTGCAATTTGAAACTGGAAGACTTGGAGTGCAGGAGAGGTAAGTGAATTCCAGTGTAGCGGTG  
AAATGCGCAGATATTAGGAGGAACACCGTGGCGAAGGCGATTACTGGACTGTAAGTACACTGAGGCTCGAAAGCGTG  
GGGAG

>ASV:5398:Genus:Haemophilus  
TACGGAGGGTGCAGCGTTAATCCGGAATAACTGGGCGTAAAGGGCACGAGGCGGTGACTTAAAGTGAAGTGTGAAAGCCC  
AGGGCTTAACCTGGGAATTGCATTTCACTAGGTCGCTAGAGTACTTTAGGGAGGGGTAGAATTCCACGTGTAGCGGTG  
AAATGCGTAGAGATGTGGAGGAATACCGAAGGCGAAGGCGAGCCCTTGGGAATGTACTGACGCTCATGTGCGAAAGCGTG  
GGGAG

>ASV:5399:Family:Peptococcaceae  
TACGTAGGTGGCGAGCGTTGTCCGGAATGACTGGGCGTAAAGGGCGTGTAGGTGGACTAATCAGTCCGATGTGAAAGCCC  
CAGGCTTAACCTGGGAACCGCATCCGATACGGTCAAGTCTTGGAGTGCAGGAGAGGGCAGTGAATTCCCAGTGTAGCGGTG  
AAATGCGTAGAGATTGGGAGGAACACCAAGTGGCGAAGGCGGCTGCTGGACCTAAGTACACTGAGGCTCGAAAGCGTG  
GGGAG

>ASV:5400:Family:Bifidobacteriaceae  
TACGTAGGGTGCAGCGTTATCCGGAATTATTGGGCGTAAAGGGCTCGTAGGCGGTTCTGCGGCTCCGGTGTGAAAGTCC  
ATCGCTTAACCGTGGATCCGCGCCGAGTACGGGCGGCTTGGAGTGCAGGAGAGGACTGGAATTCCCAGTGTAGCGGTG  
GAATGTGTAGATATCGAGAGGAACACTCGTGGCGAAGGCGGCTTCTGGACATTAAGTACACTGAGGCTCGAAAGCGTG  
GGGAG

>ASV:5401:Phylum:Firmicutes  
TACGTAGGGGGCTAGCGTTATCCGGATTTACTGGGTGTAAGGGAGCGTAGACGGTGTGGCAAGTCTGATGTGAAAGGCA  
TGGGCTCAACCTGTGGACTGCATTGAAACTGTCACTTGGAGTGCAGAAGGGGAGAGTGAATTCCATGTGTAGCGGTG  
AAATGCGTAGATATATGGAGGAACACCGTGGCGAAGGCGGCTTCTGGTCTGTAAGTACACTGAGGCTCGAAAGCGTG  
GGGAG

>ASV:5402:Genus:Erysipelotrichaceae\_UCG-003  
AACGTAGGGTGCAGCGTTGTCCGGAATTACTGGGTGTAAGAGGGAGCAGGCGGCACTAAGGGTCTGTGGTGAAGATC  
GAAGCTTAACCTCGGTAAGCCATGAAACCGTAGAGCTAGAGTGTGTGAGAGGATCGTGAATTCCATGTGTAGCGGTG  
AATGCGTAGATATATGGAGGAACACCAAGTGGCGAAGGCGGCTTACTGGACGTAAGTACACTGAGGCTCGAAAGCGTG  
GGAGC

>ASV:5403:Genus:Porphyromonas  
TACGGAGGATACGAGCGTTATCCGGATTTATTGGGTTAAAGGGTGCAGGCGGCTTGGCAAGTCAAGTGTGAAAGCTG  
GAGGCTCAACCTCAGCCTTCCGTTGAAACTGTAAGACTTGGAGTACATGACGTGGGCGGAATGCGTAGTGTAGCGGTG

AAATGCATAGATATTACGCAGAACTCCGATTGCGAAGGCAGCTCACAAAGGTATATCTGACACTGAGGCACGAAAGCGTG  
GGGAG  
>ASV:5404:Family:Lachnospiraceae  
AACGTAGGTCACAAGCGTTGTCCGGATTTACTGGGTGTAAGGGAGCGTAGACGGCAGCAAGCCAGATGTGAAAGCC  
GGGGCTCAACCCGGGACTGCTTTTGAAGTGAAGGCTTATTGCCGGAGAGGTAAGCGGAATTCCTAGTGTAGCGGTG  
AAATGCGTAGATATTAGGAGGAACACCAAGTGGCGAAGGCGGCTTACTGGACGGTAAATGACGCTGATGCTCGAAAGCGTG  
GGGAG  
>ASV:5405:Genus:Mycobacterium  
TACGTAGGGTGCAGCGTTGTCCGGAATTTACTGGGCGTAAAGAGCTCGTAGGTGTTGTTCGCGTTGTTCTGTA  
ACAGCTTAACGTGGGCGTGGGGCGATACGGGCAGACTAGAGTACTGCAGGGGAGACTGGAATTCCTGGTGTAGCGGTG  
GAATGCGCAGATATCAGGAGGAACACCGGTGACGAAGGCGGCTCTCTGGGCAGTAACTGACGCTGAGGAGCGAAAGCGTG  
GGGAG  
>ASV:5406:Family:Erysipelotrichaceae  
TACGTAGGTCACAAGCGTTGTCCGGAATTTACTGGGTGTAAGGGTGCCTAGGTGGCGTACTGAGTCTGTAGTAAAGGCA  
ATGGCTCAACCATTTGAAGCTATGAAACTGGTATGCTAGAGTGCAGAAGAGGGCGATGGAATTCATGTGTAGCGGTAA  
AATGCGTAGATATATGAGGGAACACCAAGTGGCGAAGGCGGCTGCCTGTTCTGTAACCTGACACTGAGGACGAAAGCGTG  
GGAGC  
>ASV:5407:Family:Lachnospiraceae  
TACGTAGGTGGCAGCGTTATCCGGATTTACTGGGTGTAAGGGCGCGTAGGCGGGAATGCAAGTCAGATGTGAAATCCA  
GGGGCTTAACCTGGGACTGCTTTTGAAGTGTGACTAGAGTGCAGGAGAGGTAAGCGGAATTCCTAGTGTAGCGGTG  
AAATGCTTAGATATACGAAGAATCCGATTGCGAAGGCAGCTCACTAGACTGCAACTGACACTGATGCTCGAAAGTGTG  
GGTAT  
>ASV:5408:Order:Clostridiales  
TACGTAGGGAGCAAGCGTTGTCCGGAATTTACTGGGCGTAAAGGGTGCCTAGGCGGCCGTTTAAAGTCAGATGTGAAATACC  
CGTGCTTAACATGGGGCTGCATTTGAAACTGGATGGCTTGTAGTGCAGGAGAGGCAAGTGGAAATTCAGTGTAGCGGTG  
AAATGCGTAGATATTCGAGGAACACCAAGTGGCGAAGGCGGCTTCTGGGCTTAACTGATGCTGAGGCTCGAAAGTGTG  
GGGAG  
>ASV:5409:Family:Family\_XIII  
TACGGAGGATCCGAGCGTTATCCGGATTTATTGGGCGTAAAGAGTGCCTAGGTGTAACCTAAGCGCGGGTTTAAAGGCA  
ATGGCTTAACCATTTGTCGCCCTGCGAACTGGGATACCTTGTAGTGCAGGAGAGGAAAGCGGAATTCCTAGTGTGGCGGTGA  
AATGCGTAGATATTAGGAGGAACACCAAGTGGCGAAGGCGGCTTACTGGACGATAACTGACGCTGAGGCTCGAAAGCATGG  
GTAGC  
>ASV:5410:Order:Clostridiales  
TACGTATGGAGCAAGCGTTATCCGGATTTACTGGGTGTAAGGGAGTGTAGGTGGCCATGCAAGTCAGAAGTGA  
TGGGCTTAACCCATAAACTGCATTTGAAACTGTGGTCTTGTAGTGAAGTAGAGGTAAGCGGAATTCCTAGTGTAGCGGTG  
AAATGCGTAGATATCGAGAGGAACACTCGTGGCGAAGGCGGTTCTGGACATTAAGTGCAGCTGAGGACGCAAGGCCAG  
GGGAG  
>ASV:5411:Genus:Odoribacter  
TACGGAGGATCCGAGCGTTATCCGGATTTATTGGGTTTAAAGGGTGCCTAGGCGGTTTATTAAGTTAGTGGTTAAATATT  
TGAGCTAAACTCAATTTGCCATTAATACTGGTAAACTGGAGTACAGACGAGGTAGGCGGAATTCGCTGGTGTAGCGGTGA  
AATGCTTAGATATCACGAAGAATCCGATTGCGAAGGCAGCTCACTAGACTGCAACTGACACTGATGCTCGAAAGTGTGG  
GTATC  
>ASV:5412:Genus:Butyricimonas  
TACGGGGATCCGAGCGTTATCCGGATTTATTGGGTTTAAAGGGCGCTAGGCGGGACGTCAAGTCAGCGGTAAAAGACT  
GCAGCTAAACTGTAGCACCGCTTGAAGTGGCGACCTGGAGACGAGACGAGGGAGGCGGAACAAGTGAAGTGTAGCGGTGG  
AATGCGTAGATATCGGAGGAACACCAAGTGGCGAAGGCGGCTTACTGGCACCAACTGACGCTGAGGCGGAAAGTGTGG  
GTAGC  
>ASV:5413:Kingdom:Bacteria  
TACGTAGGGAGCGAGCGTTATCCGGATTTATTGGGCGTAAAGCGTGTAGGCGGTTTGTAAAGTTTAAAGTAAAGCCT  
GGGGCTCAACTCCAGTTTGTCTTAAAACTGGTAAGCTTGTAGTATGGTAGAGGTAATGGAATTCCTAGTGTAGCGGTGA  
AATGCTTAGATATCACGAAGAATCCGATTGCGAAGGCAGCTCACGGGAGCGCAACTGACGCTGAAGCTCGAAAGTGTGG  
GTATC  
>ASV:5414:Family:Lachnospiraceae  
TACGTATGGTCAAGCGTTATCCGGATTTACTGGGTGTAAGGGTGCCTAGGTGGTATGGCAAGTCAGAAGTGA  
GGGGCTCAACCCAGGACTGCTTTTGAAGTGTCAAAGTACAGGAGAGGAAAGCGGAATTCCTAGCGTGTAGCGGTG  
AAATGCGTAGATATTCGAGGAACACCAAGTGGCGAAGGCAGCTGCTAAGCTGCAACTGACATTGAGGCTCGAAAGTGTG  
GGTAT  
>ASV:5415:Genus:Clostridium\_sensu\_stricto\_1  
TACGTAGGTGGCAGCGTTGTCCGGATTTACTGGGCGTAAAGGGAGCGTAGGCGGATTTTAAAGTGTAGTGTGAAATACT  
CAGGCTTAACCTGAGTGTGCTTCAAACTGGAAGTCTAGAGTGCAGGAGAGGAGAAGGGAATTCCTAGTGTAGCGGTG  
AAATGCGTAGAGATTAGGAAGAACACCAAGTGGCGAAGGCGCTTCTCTGGACTGTAACGACGCTGAGGCTCGAAAGCGTG  
GGGAG  
>ASV:5416:Genus:Ruminococcus\_1  
TCCTTCTTTCTCTCTTTTTCTTCTTCTGGGTGTAAGGGAGCGTAGGCGGGATCGCAAGTCAGATGTGAAACTA  
TGGGCTTAACCCATAAACTGCATTTGAAACTGTGGTCTTGTAGTGAAGTAGAGGTAAGCGGAATTCCTAGTGTAGCGGTG  
AAATGCGTAGATATTAGGAGGAACATCAGTGGCGAAGGCGGCTTACTGGGCTTAACTGACGCTGAGGCTCGAAAGCGTG  
GGGAG  
>ASV:5417:Genus:Ruminiclostridium\_9

TACGGAGGATCCGAGCGTTATCCGGATTTATTGGGTTAAAGGGCGTGTAGGCGGGATCGCAAGTCAGATGTGAAAACCTG  
GAGGCTCAACCTCCAGCCTGCATTTGAAACTGTGGTCTTGGAGTACTGGAGAGGCAGACGGAATTCCTAGTGTAGCGGTG  
AAATGCGTAGATATTAGGAGGAACACCAGTGGCGAAGGCGGTCTGCTGGACAGCAACTGACGCTGATGCTCGAAAGTGTG  
GGTAT

>ASV:5418:Genus:Noviherbaspirillum

TACGTAGGGTCAAGCGTTAATTGGAATTACTGGGCGTAAAGCGTGCAGGCGGTTGTGCAAGACCGATGTGAAATCCC  
CGGGCTTAACCTGGGAATGGCATTGGTACTGCACGGCTAGAGTGTGTGAGAGGGGGTGAATTCACGCTGTAGCAGTG  
AAATGCGTAGAGATCGGAGGAATACCGATGGCGAAGGCAGCCCCCTGGGATAACACTGACGCTCATGCACGAAAGCGTG  
GGGAG

>ASV:5419:Family:Erysipelotrichaceae

TACGGAGGATCCGAGCGTTATCCGGAATCATTGGGCGTAAAGGGTGCCTAGGTGGCGTACTAAGTCTGTAGTAAAAGGCA  
ATGGCTCAACCATTTGAAGCTATGAAACTGGTATGCTGGAGTGCAGAAGAGGGCGATGGAATTCATGTGTAGCGGTA  
AATGCGTAGATATTGGGAGGAACACCAGTGGCGAAGGCGCCTTTCTGGACTGTGTCTGACGCTGAGATGCGAAAGCCAG  
GTAGC

>ASV:5420:Genus:Catabacter

TACGTAGGGAGCAAGCGTTGTCCGGAATTACTGGGCGTAAAGGGTGCCTAGGTGGCCATGTAAGTCAAGCGTGAAAGACC  
GGGGCTCAACCCGGGTTGCCTTGAACCTGTGGCTTGGTACAGGAGAGGGAAGTGAATTCCTAGTGTAGCGGTG  
AAATGCGTAGATATTAGGAGGAACACCAGTGGCGAAGGCGACTTTCTGGACTGTAACGACTGAGGACGAAAGCGTG  
GGGAG

>ASV:5421:Family:Lachnospiraceae

TACGTATGGTCAAGCGTTATCCGGATTTACTGGGTGTAAGGGAGCGTAGACGGCGAAGCAAGTCAGAAGTAAAACCC  
AGGGCTTAACCTCGGACTGCTTTTGAACCTGTGACTGGAGTGCAGGAGAGGTAAGCGGAATTCCTAGTGTAGCGGTG  
AAATGCGTAGATATTAGGAGGAACACCAGTGGCGAAGGCGGCCACCTGGACGGTAACGACTGAGGTGCGAAAGCGTG  
GGTAG

>ASV:5422:Family:Lachnospiraceae

TACGGAGGATCCGAGCGTTATCCGGATTTACTGGGTGTAAGGGAGCGTAGACGGTGTGGCAAGTCTGATGTGAAAGGCA  
TGGGCTCAACCTGTGGACTGCATTGAAACTGTCTACTAGAGTGTGCGAGGGGTAAGCGGAATTCCTAGTGTAGCGGTG  
GAATGCGCAGATATCGGGTGGAAACACCAGTGGCGAAGGCGGCCCTCTGGGCCGAGACCGACTGAGGCGCGAAAGCTG  
GGTAT

>ASV:5423:Genus:Acidaminococcus

TACGTATGGTCAAGCGTTGCCCGGAATGATTGGGCGTAAAGGGCGCGCAGGCGGCCGGCAAGTCTGTCTAAAAAATGC  
GGGCTTAACCCCGTATGGCTTGGATACTGGAAGTCTTGGTGCAGGAGAGGAAAGGGGAATTCCTAGTGTAGCGGTG  
AAATGCGTAGATATTGGGAGGAACACCAGTGGCGAAGGCGCCTTTCTGGACTGTGTCTGACGCTGAGATGCGAAAGCCAG  
GTAGC

>ASV:5424:Family:Clostridiales\_vadinBB60\_group

TACGGAGGATGCAAGCGTTATCCGGAATGACTGGGCGTAAAGGGTGCCTAGGTGGTTTGTCAAGTTGGCAGCGTAATTCC  
GTGGCTTAACCCGGAATGACTGCGTAAACTGATAGCCTTGGTGCAGGAGAGGAAAGGGGAATTCCTAGTGTAGCGGTG  
GAATGCGTAGATATTAGGAGGAACACCAGTGGCGAAGGCGGCTTACTGGACGGTAACGACTGAGGCTCGAAAGCGTG  
GGGAG

>ASV:5425:Family:Ruminococcaceae

TACGTAGGTGGCAAGCGTTGTCCGGATTTACTGGGTGTAAGGGAGCGCAGGCGGGAGAGCAAGTCAGCGGTGAAATACA  
TGGGCTTAACCCGGAATGACTGCGTAAACTGTTTCTTGGTATCGGAGAGGCAATCGGAATTCCTAGTGTAGCGGTG  
AAATGCGTAGATATTAGGAGGAACACCAGTGGCGAAGGCGGATTGCTGGACGACAACGACTGAGGCTGAGGCGCGAAAGCGTG  
GGGAG

>ASV:5426:Family:Lachnospiraceae

TACGTAGGGGGCAAGCGTTATCCGATTTACTGGGTGTAAGGGAGCGTAGACGGCAAGCAAGTCTGATGTGAAAACCC  
AGAGCTTAACCCGGAATGACTGCGTAAACTGCTACTTGGTGCAGGAGGGTAAGCGGAATTCCTAGTGTAGCGGTG  
AAATGCGTAGATATTAGGAGGAACACCAGTGGCGAAGGCGGCTTTCTGGACTGAAACTGACTGAGGACGAAAGCGTG  
GGGAG

>ASV:5427:Order:Clostridiales

TACGTAGGGGGCGAGCGTTGTCCGGAATGACTGGGCGTAAAGGGTGCCTAGGCGGCCCTGCAGGTCAGATGTGAAATACC  
CGTGCTTAACATGGGGCTGCATTTGAAACCGTAGGGCTTGGTGCAGGAGGTAAGTGAATTCCTAGTGTAGCGGTG  
AAATGCGTAGAGATCGGAGGAACACCAGTGGCGAAGGCGGATTGCTGGACGACAACGACTGAGGCTGAGGCGCGAAAGCGTG  
GGGAG

>ASV:5428:Genus:Acidaminococcus

TACGGAGGATCCGAGCGTTATCCGATTTACTGGGTGTAAGGGAGCGTAGACGGTTTTGCAAGTCTGACGTGAAAATGC  
GGGGCTTAACCCCGTATGGCGTTGGATACTGGAAGTCTTGGTGCAGGAGAGGAAAGGGGAATTCCTAGTGTAGCGGTG  
AATGCGTAGATATTGGGAGGAACACCAGTGGCGAAGGCGCCTTTCTGGACTGTGTCTGACGCTGAGGACGAAAGCGTG  
GTAGC

>ASV:5429:Order:Bacteroidales

TACGGAGGATCCGAGCGTTATCCGATTTATTGGGTTAAAGGGAGCGTAGATGGATGTTTAAAGTCAAGTGTGAAAATTT  
GCGGCTCAACCCGTAATGCGTTGAAACTGGGTTACTTGGTGTGTTTGGAGTAGGCGGAATGCGTGGTGTAGCGGTG  
GAATGCGCAGATATCGGAAGAACACCAGTGGCGAAGGCGCCTTTCTGGACTGTGTCTGACGCTGAGGCGCGAAAGCTAG  
GGGAG

>ASV:5430:Genus:Anaerotruncus

TACGTAGGGAGCAAGCGTTGTCCGGAATTACTGGGTGTAAGGGAGCGTAGGCGGGATGGCAAGTAGAATGTTAAATCCA  
TCGGCTCAACCCGGTGGCTGCGTTCTAAACTGCCGTTCTTGGTGAAGCAGAGGCGAGGCGGAATTCCTAGTGTAGCGGTG  
AATGCGTAGAGATTGGGAGGAACACCAGTGGCGAAGGCGACTAACTGGACTGTAACGACTGAGGCGCGAAAGTGTGG



GGAGC

>ASV:5431:Genus:UC5-1-2E3

TACGTAGGGAGCGAGCGTTGTCCGGAATTACTGGGTGTAAGGGGTGCGTAGGCGGCAGAGCAAGTCAGATGTGAAATACA  
CGGGCTTAACCCCGGACTGCTTTGGAACTGTAGAGCTAGAGTGTGGAGAGGCAAGCGGAATTCCTAGTGTAGCGGTG  
AAATGCGTAGATATTAGGAAGAACCAGTGGCGAAGGCGGCTTCTGGACAGTAACGACGTTAGGCTCGAAAGCGTG  
GGTAG

>ASV:5432:Family:Lachnospiraceae

TACGTAGGGGGCAAGCGTTATCCGGATTTACTGGGTGTAAGGGGAGCGTAGACGGCACGGCAAGCCAGATGTGAAAGCCC  
GGGGCTCAACCCCGGACTGCATCCAATACTGTCCGACTTGTAGTGCAGGAGAGGAAAGCGGAATTCCTAGTGTAGCGGTG  
AAATGCGTAGATATTAGGAGGAACCAGTGGCGAAGGCGGCTTCTGGACTGTAACGACACTGAGGCACGAAAGCGTG  
GGGAG

>ASV:5433:Family:Lachnospiraceae

TACGGAGGATCAAGCGTTATCCGGATTTACTGGGTGTAAGGGGAGCGCAGACGGCGATGCAAGTCTGGAGTGAAGCCC  
GGGGCTCAACCCCGGACTGCTTTGGAACTGTATGGCTAGAGTGTGGAGAGGCAAGCGGAATTCCTAGTGTAGCGGTG  
AAATGCGTAGATATCGGGAGGAACCAGTGGCGAAGGCGGCTTCTGGACTGAAACGACACTGAGGCACGAAAGCGTG  
GGGAG

>ASV:5434:Order:Clostridiales

TACGGAGGATCCGAGCGTTATCCGGATTTACTGGGTGTAAGGGGTGAGTAGGCGGGAAGTCAAGTCAGATGTGAAATGCC  
GCGGCTTAACCTGCGAACTGCATTTGAACTGATTTTCTTGAGAGTGCAGAGGCAATCGGAATTCCTAGTGTAGCGGTG  
AAATGCGTAGATATCACGAAGAACTCCGATTGCGAAGGCAGCTGCTAAGCTGCAACGACATTGAGGCTCGAAAGTGTG  
GGTAT

>ASV:5435:Order:Bacteroidales

TACGTAGGTCCGAGCGTTATCCGGATTTACTGGGTGTAAGGGGTGCGTAGGCGGATTAGTAAGTTAGAGGTGAAAGCTC  
GATGCTCAACATCGAAATGCTCTGATACTGTTAGTCTAGAGTATAGTTGCGGAAGGCGGAATGTGTGGTGTAGCGGTG  
AAATGCGTAGATATTAGGAGGAACATCAGTGGCGAAGGCGGCTTACTGGGCTTAACTGACGCTGAGGCTCGAAAGCGTG  
GGGAG

>ASV:5436:Genus:Anaerofilum

TACGTATGGTGCAAGCGTTATCCGGATTTACTGGGTGTAAGGGGTGCGTAGGCGGCTTTTAAAGTCAGCGGTGAAAGTCT  
GTGGCTCAACCATAGAATTGCCGTTGAACTGGGAGGCTTGTAGTGCAGAGGTAGGCGGAATTCGCGGTGTAGCGGTG  
GAATGCGTAGATATCGGGAGGAACCAGTGGCGAAGGCGGCTTACTGGGCACCAACTGACGCTGAGGCTCGAAAGTGTG  
GGTAG

>ASV:5437:Genus:Ezakiella

TACGTAGGGAGCAAGCGTTGTCCGGATTTACTGGGTGTAAGGGGTGCGTAGGCGGCTTTGCAAGTCAGATGTGAAAAC  
AGGGCTCAACCCATAGATTGCATCTGAACTGATATGCTTGTAGTCAAGGAGAGGAAAGTGAATTCCTAGTGTAGCGGTG  
AAATGCGTAGATATTAGGAGGAACCAGTGGCGAAGGCGGCTTCTGGACGACAACGACGCTGAGGCGCGAAAGCGTG  
GGGAG

>ASV:5438:Family:Ruminococcaceae

TACGTAGGGAGCAAGCGTTGTCCGGATTTACTGGGTGTAAGGGGCGTGACGCGGGAATGCAAGTCAGATGTGAAATCCA  
TGGGCTTAACCCATGAAGTGCATTTGAACTGCAGAGCTTGTAGTGAAGTAGAGGCAGGCGGAATTCGCGGTGTAGCGGTG  
AAATGCGTAGATATACGGAGGAACCAGTGGCGAAGGCGGCTTCTGGACATTAACGACGCTGAGGCACGAAAGCGTG  
GGTAG

>ASV:5439:Family:Lachnospiraceae

TACGGAGGATCCGAGCGTTATCCGGATTTACTGGGTGTAAGGGGAGCGTAGGCGCCATGCAAGTCAGAAGTGAAGCCC  
GGGGCTCAACCCCGGACTGCTTTGAACTGTAAGGCTAGATTGCCGAGAGGTAAAGCGGAATTCCTAGTGTAGCGGTG  
AAATGCGTAGATATTAGGAGGAACCAGTGGCGAAGGCGGCTTACTGGACGGTGAATGACGCTGAGGCTCGAAAGCGTG  
GGGAG

>ASV:5440:Genus:Sphingopyxis

TACGGAGGGAGCTAGCGTTGTTCGGAATTACTGGGCGTAAAGCGCGCGTAGGCGGTTTTTTAAGTCAGAGGTGAAAGCCC  
AGTGCTCAACACTGGAAGTGCCTTTGAACTGAAAACCTTGAATCTTGGAGAGGTGAGTGAATTCGAGTGTAGAGGTG  
AAATTCGTAGATATTGGAAGAACCAGTGGCGAAGGCGACTGACTGGACAAGTATTGACGCTGAGGTGCGAAAGCGTG  
GGGAG

>ASV:5441:Family:Lachnospiraceae

TACGTAGGGGGCAAGCGTTATCCGGATTTACTGGGTGTAAGGGGAGCGTAGACGGCGCAGCAAGTCTGATGTGAAAGGCG  
GGGGCTTAACCCCTGGACTGCATTGAAACTGCTGTGCTTGTAGTGCAGGAGGGTAAGCGGAATTCCTAGTGTAGCGGTG  
AAATGCGTAGATATTAGGAGGAACCAGTGGCGAAGGCGACTCACTAGACTGCAACTGACACTGATGCTCGAAAGTGTG  
GGTAT

>ASV:5442:Species:massiliensis/phocaeensis

TACGTAGGGGGCGAGCGTTATCCGGATTCATTGGGCGTAAAGCGCGCGTAGGCGGCCGCGCAGGCGGGGGGTCAAATCCC  
GGGGCTCAACCCCGGCGCCCGCCCGAACCGCGCGGCTTGGTCCGCGAGGGGAGGGTGAACGCCCGGCTGTAGCGGTGG  
AATGCGCAGATATCGGGCGGAACCCGGTGGCGAAGGCGGCTTCTGGGCGGCACCGACGCTGAGGCGGAGAGCGGG  
GGAGC

>ASV:5443:Genus:DTU089

TACGGAGGATCCGAGCGTTGTCCGGATTTACTGGGTGTAAGGGGTGCGTAGGCGGATCTGCAAGTCAGTGTGAAATCCC  
AGGGCTTAACCCCTGGAAGTGCATTTGAACTGTGGTCTTGTAGTGCAGGAGGAGGCGGGAATTCGTTGGTGTAGCGGTG  
AAATGCTTAGATATCACGAAGAACTCCGATTGCGAAGGCGACTCACTGGACTGCAACTGACACTGATGCTCGAAAGTGTG  
GGTAT

>ASV:5444:Species:johnsonii/naeslundii/oris

TACGTAGGGCGGAGCGTTGTCCGGATTTACTGGGCGTAAAGAGCTCGTAGGCGGCTGGTCCGCTGTGCTGAAATCCT

CTGGCTTAACTGGGGCTTGCAGGTGGGTACGGGCGCGCTTGTAGTGGGTAGGGGAGGCTGGAACCTCCTGGTGTAGCGGTG  
GAATGCGCAGATATCAGGAAGAACCACCGGTGGCGAAGGCGGGTCTCTGGGCCGTTACTGACGCTGAGGAGCGAAAGCGTG  
GGGAG

>ASV:5445:Family:Lachnospiraceae

TACGTATGGTGAAGCGTTATCCGGATTTACTGGGTGTAAGGGAGCGCAGATGGAAGAGCAAGTCTGATGTGAAAGGCT  
GGGGCTTAAACCCAGGACTGCATTGAAACTGTTTATCTAGAGTGTGGAGAGGTAAGTGAATTCCTAGCGTAGCGGTG  
AAATGCATAGATATCACTTGAACCCGATAGCGAAGGCAGCTTCCAGGCTCGATCTGACGCTGATGCGCGAGAGCGTG  
GGTAG

>ASV:5446:Order:Clostridiales

TACGTAGGGGGCAGCGTTGTCCGGATTTACTGGGTGTAAGGGTGCCTAGGCGGCTAGACAAGTCAGGTGTGAAATATC  
GCAGCTTAACTGCGGGGCTGCACCTGAAACTGTATAGCTTGTAGTGTGGAGAGGTAAGCGGAATTCCTAGTGTAGCGGTG  
AAATGCGTAGATATTAGGAGGAACACCAGTGGCGAAGGCGGCTTACTGGACATTAACGACGCTGAGGTACGAAAGCGTG  
GGGAG

>ASV:5447:Family:Ruminococcaceae

TACGTAGGGAGCGAGCGTTGTCCGGATTTACTGGGTGTAAGGGTGCCTAGGCGGCTAGACAAGTCAGGTGTGAAATATC  
GCAGCTTAACTGCGGGGCTGCACCTGAAACTGTATAGCTTGTAGTGTGGAGAGGTAAGCGGAATTCCTAGTGTAGCGGTG  
AAATGCGTAGATATTAGGAGGAACACCAGTGGCGAAGGCGGCTTACTGGACATTAACGACGCTGAGGCACGAAAGCGTG  
GGGAG

>ASV:5448:Genus:Prevotella

TACGGAAGGTTCCGGCGTTATCCGGATTTATTGGGTTAAAGGGAGCGTAGGCCGTTTGGTAAGCGTGTGTGAAATGTA  
GGAGCTCAACTCTAGATTGCAGCACGAACTGTCAGACTTGTAGTGGCGACAACGTAGGCGGAATTCATGGTGTAGCGGTG  
AAATGCTTAGATATCATGAAGAACCAGTGGCGAAGGCGGCTTACGGGAGCGCAACTGACGCTGAAGCTCGAAGGTGCG  
GGTAT

>ASV:5449:Genus:Butyricimonas

TACGGGGGATGCGAGCGTTATCCGGATTTATTGGGTTAAAGGGCGCGTAGGCGGGACGTCAGTCAGCGGTAAAAGACT  
GCAGCTAAACTGTAGCACGCGGTTGAAACTGTCGACCTGGAGACGAGACGAGGGAGGCGGAACAAGTGAAGTAGCGGTGA  
AATGCATAGATATCACTTGAACCCGATAGCGAAGGCAGCTTCCAGGCTCGGTCTGACGCTGATGCGCGAGAGCGGTG  
GTAGC

>ASV:5450:Genus:UBA1819

AACGTAGGGTGAAGCGTTGTCCGGAACTTACTGGGTGTAAGGGAGCGCAGGCGGATTGGCAAGTTGGGAGTGAAATCTA  
TGGGCTCAACCCATAAATTGCTTTCAAACCTGTCAGTCTTGTAGTGGTGTAGAGGTAGGCGGAATTCGTTGTGTAGCGGTG  
AAATGCATAGATATAACGAAGAACCCTAATTGCGCAGGCAGCTTACTAACTATAACTGACGCTGAAGCACGAAAGCGTG  
GGTAT

>ASV:5451:Family:Prevotellaceae

TACGGAGGATCCGAGCGTTATCCGGATTTATTGGGTTAAAGGGAGCGTAGGCCGAGATTAAGCGTGTGTGAAATGTA  
GGTGCTCAACATCTGCACTGCAGCGCAACTGGTTTCTTGTAGTGGCGGGAAGTAGGCGGAATTCGTCGTGTAGCGGTG  
AAATGCTTAGATATGACGAAGAACCCTGATTGCGAAGGCAGCTGCTGTAGCGCAACTGACGCTGAAGCTCGAAGCGTG  
GGTAT

>ASV:5452:Genus:Bilophila

TACGGAAGATGCGAGCGTTATCCGGATTTATTGGGTTAAAGGGAGCGTAGGCCGCTTGGTAAGTCAGGGGTGAAATCCC  
ACAGCCCAACTGTGGAAGTGCCTTTGATACTGCCAGGCTTGTAGTACCGGAGAGGGTGGCGGAATTCAGGTGTAGGAGTG  
AAATGCGTAGATATCTGGAGGAACACCAGTGGCGAAGGCGGCTTACTGGACGTAACGACGCTTGGGCTCGAAGCGTG  
GGGAG

>ASV:5453:Family:Ruminococcaceae

TACGTAGGTGGCAAGCGTTGTCCGGAACTTACTGGGTGTAAGGGAGCGTAGGCGGGATGCCAAGTCAGCTGTGAAAACCTA  
TGGGCTTAACTGTAGACTGCAGTTGAAACTGGTATTCTTGTAGTGCAGGAGAGGAGAGTGAATTCCTAGTGTAGCGGTG  
AAATGCGTAGATCTGGAGGAACACCAGTGGCGAAGGCGGCTTACTGGACGATAACTGACGCTGAGGCTCGAAGCGTG  
GGGAG

>ASV:5454:Family:Lachnospiraceae

TACGTAGGGAGCAAGCGTTGTCCGGATTTACTGGGTGTAAGGGAGCGCAGGCGGTACGGCAAGTCTGATGTGAAAGCCC  
GGGGCTCAACCCGCTACTGCATTGAAACTGTCCGACTAGAGTGTGGAGGGTAAGTGAATTCACGCTGATGACGAGT  
AAATGCGTAGATATGTGGAAGAACCACCGATGGCGAAGGCAGCCCTCTGGGACATGACTGACGCTCATGCACGAAAGCGTG  
GGGAG

>ASV:5455:Genus:Asaccharospora

TACGTAGGTGGCAGCGTTATCCGGAACTTACTGGGCGTAAAGGGTGCCTAGGCGGCTTTCAAGTCAGGAGTGAAAGGCT  
ACGGCTCAACCGTAGTAAGCTCTTGAACCTGTAAGACTTGTAGTGCAGGAGAGGAGAGTAGAATTCCTAGTGTAGCGGTGA  
GATGCATAGATATGACGCGAAGTCCGATTGCGAAGGCAGCATACCAACTCGCGACTGACGCTGAGGCTCGAAGCGGTG  
GTATC

>ASV:5456:Order:Clostridiales

TACGTAGGGGGCAAGCGTTATCCGGAACTTACTGGGCGTAAAGGGTGCCTAGGCGGTTTTACAAGTTGAAGTTTTAAACTA  
TGGGCTTAAACCATATCAGGCTTCAAACCTGTAAGACTTGTAGTGCAGGAGAGGAAAGTGAATTCCTAGTGTAGCGGTGA  
AATGCGTAGATATCGGAGGAATACCGGTGGCGAAGGCGACTTTCTGGACTGTAACGACGCTGAGGCACGAAAGCGTG  
GTAGC

>ASV:5457:Genus:Peptoniphilus

TACGTAGGGGGCAGCGTTGTCCGGAACTACTGGGCGTAAAGGGTTCGAGGCGGTTTTACCAAGTCCGATGTGAAAGGCA  
TGGGCTCAACCCATGTAAAGCTTGGAACTGGTAGACTTGTAGTAAAGGAGAGGTAAGTGGATTCCTAGTGTAGCGGTGA  
AATGCGTAGATATTAGGAAGAATACCGGTGGCGAAGGCGACTTACTGGACTTAACTGACGCTGAGGAACGAAAGCGGTG  
GGAGC

>ASV:5458:Genus:Faecalitalea  
TACGTAGGTGGCAAGCGTTATCCGGAATCATTGGGCGTAAAGGGTGCCTAGGTGGCAGGATAAGTCTGAAGTAAAAGGCA  
ACAGCTCAACTGTTGTATGCTTTGGAACTGTCGAGCTAGAGTGCAGAAGAGGGCGTTGGAATTCATGTGTAGCGGTAA  
AATGCGTAGATATATGGAGGAACACCAGTGGCGAAGGCGGCTGCCTGGTCTGTAACCTGACACTGATGCACGAAAGCGTGG  
GGAGC

>ASV:5459:Genus:Massilia  
TACGTAGGGTGAAGCGTTAATCGGAATTACTGGGCGTAAAGCGTGCAGGCGGTTTCGTAAGTCTGTCTGTGAAAGCCC  
CGGGCTCAACCTGGGAATTGCGACTGCACCTGAGACTGCGAGGCTAGAGTGTGTGAGAGGGGGTGAATTCACGCTGACAGTG  
AAATGCGTAGATATATGGAGGAACACCAGTGGCGAAGGCGAGCCCTGGGATAAACACTGACGCTCATGCACGAAAGCGTG  
GGGAG

>ASV:5460:Genus:Thiothrix  
TACGAAGGTGCAAGCGTTAATCGGAATTACTGGGCGTAAAGCTCACGTAGGCGGCTTTTAAAGTCAAGTGTGAAATCCC  
CGGGCTTAACCTGGGAATTGCGACTGCACCTGATACTGGAAGCTAGAAATGTGGGAGAGGAGAGTGAATTTCCGGTGTAGCGGTG  
AAATGCATAGAGATCGGAAGGAACACCAGTGGCGAAGGCGGCTCTCTGGACCAACATTGACGCTGAGGTGCGAAAGCGTG  
GGTAG

>ASV:5461:Order:Clostridiales  
TACGGAGGATCCGAGCGTTATCCGGATTTATTGGGTTTAAAGGGAGCGTAGATGGATGTTTAAAGTCAAGTGTGAAAGTTT  
GCGGCTTAACCTGGGAATTGCGACTGCACCTGAGACTGAGTACCGAGGGGTAAGCGGAATTCCTAGTGTAGCGGTG  
AAATGCGTAGATATTAGGAGGAACACCAGTGGCGAAGGCGGCTCTCTGGACTGTTACTGACACTGAGGCACGAAAGCGTG  
GGGAG

>ASV:5462:Family:Lachnospiraceae  
TACGTATGGTGAAGCGTTATCCGGATTTACTGGGTGTAAGGGAGCGTAGACGGCTGTGTAAGTCTGAAGTGAAGGCC  
GGGGCTCAACCCCGGACTGCTTTGGAACTATGCAGCTAGAGAACAGAAGAGGACGCGGAACTCCATGTGTAGCGGTG  
AAATGCGTAGATATAAGGAAGAACACCAGTGGCGAAGGCGGATAACTGGACGCAACTGACGGTGAGGCGCGAAAGCGTG  
GGGAG

>ASV:5463:Genus:Scardovia  
TACGTAGGGGGCAAGCGTTATCCGGATTTACTGGGTGTAAGGGCTCGTAGGCGGTTTGTTCGCTGTTGTTGAAAGCTT  
ACTGCTTAACCTGAGTGGTTCGCTGGATACGGGCGGCTTGTAGTGCAGTAGGGGAGACTGGAATTCCTGGTGTACGCGTGG  
AATGTGTAGATTTCCGGGAAGAACACCTATGGCGAAGGCGGCTCTCTGGGCTGTTACTGACGCTGAGGAGCGAAAGCGTGG  
GGAGC

>ASV:5464:Genus:Porphyromonas  
TACGGAGGATACGAGCGTTATCCGGAATTATTGGGTTTAAAGGGTGCCTAGGTGGCTATTTAAGTCAAGGGTGAAGGCA  
TGAGCTTAACCTCATGCTTGCCTTTGAACTGGACAGCTAGAGAAAAGACGAGGTATGTGGAATGTGTGGTGTAGCGGTG  
AAATGCATAGATATCACACAGAACCTCCGATTGCGCAGGCGAGCTACCAGACTTCTTCTGACACTGAAGCACGAAAGCGTGG  
GGATC

>ASV:5465:Order:Clostridiales  
TACGTAGGGTGAAGCGTTGTCCGGAATTATTGGGCGTAAAGAGCATGTAGGCGGGCTTTTAAAGTCTGACGTGAAAATGC  
GGGGCTTAACCCCGGACTGCATTTGAACTGTCAGGCTAGAGTGTGCGAGAGGAAAGCGGAATTCCTAGTGTAGCGGTG  
AAATGCGTAGATATTAGGAGGAACACCAGTGGCGAAGGCGGCTTACTGGACGATGACTGACGCTGAGGCTCGAAAGCGTG  
GGGAG

>ASV:5466:Genus:Anaerotruncus  
TACGTAGGGAGCGAGCGTTGTCCGGAATTACTGGGTGTAAGGGAGCGTAGGCGGGATGGCAAGTTGGATGTTTAAACTA  
ACGGCTCAACTGTTAGGTGCATCCAAAAGTCTGTTCTTGTAGTGAAGTAGAGGCGAGGCGGAATTCCTAGTGTAGCGGTGA  
AATGCGTAGATATTAGGAGGAACACCAGTGGCGAAGGCGGCTTACTGGACAGTAACTGACGTTGAGGCTCGAAAGCGTGG  
GGAGC

>ASV:5467:Class:Clostridia  
AACGTAGGTCAAGCGTTGTCCGGAATTACTGGGCGTAAAGGGTGCCTAGGCGGTTCTGAAAAGTCCGATGTGAAATCCC  
CGTGCTTACATGGGAGCTGCATTCGAACTTTCCGACTTGTAGTGTGCGAGAGGTAAGCGGAATTCCTGGTGTAGCGGTG  
AAATGCGTAGATATCGGGAGGAACACCAGTGGCGAAGGCGGCTTACTGGACGACAACGACGCTGAGGCACGAAAGCGTG  
GGGAG

>ASV:5468:Family:Lachnospiraceae  
TACGTAGGGGGCAAGCGTTATCCGGAATTACTGGGTGTAAGGGAGCGTAGGCGGTTTGATAAGTTAGAGGTGAAATTTCC  
GGGGCTCAACCTGAACGTGCCTCTAATACTGTTGAGCTAGAGTGTGCGAGAGGCAAGTGAATTCCTAGTGTAGCGGTG  
AAATGCGTAGATATTAGGAGGAACACCAGTGGCGAAGGCGGATTGCTGGACGATAACTGACGCTGAGGCGCGAAAGTGTG  
GGGAG

>ASV:5469:Family:Lachnospiraceae  
TACGTATGGAGCAAGCGTTATCCGGAATTACTGGGTGTAAGGGAGTGTAGGTGGTATCACAAAGTCAAGTGAAGGCC  
GGGGCTCAACCCCGGACTGCTTTTGAAGTGCAGGACTGGAGTGCAGCATAGGTAGGCGGAATTCCTGGTGTAGCGGTG  
AAATGCTTAGATATACGAAGAAGTCCGATTGCGAAGGCGAGCTTACTGGACTGTAACGACGCTGATGCTCGAAAGTGTG  
GGTAT

>ASV:5470:Genus:Marvinbryantia  
TACGTAGGGGGCAAGCGTTATCCGGAATTACTGGGTGTAAGGGAGCGTAGACGGAATGCAAGTCAAGTCAAGTGAAGGCA  
TGGGCTTAACCTGTGGACTGCATTTGAACTGCCATTCTGGAGTGCCGGAGAGGTAAGCGGAATTCCTAGTGTAGCGGTG  
AAATGCGTAGATATTAGGAGGAACACCAGTGGCGAAGGCGGCTTACTGGACGTAACGACGTTGAGGCTCGAAAGCGTG  
GGGAG

>ASV:5471:Genus:Erysipelotrichaceae\_UCG-003  
TACGTAGGTGGCAGCGTTATCCGGAATTATTGGGCGTAAAGAGGGAGCGGGCGGCACTAAGGGTCTGTGGTGAAGATC  
GAAGCTTAACCTCGGTAAGCCATGAAACCGTAGAGCTAGAGTGTGTGAGAGGATCGTGAATTCATGTGTAGTGGTGA

AATGCTTAGAGATCAGACAGAACACCGATTGCGAAGGCAGCTTACCAAATATATCTGACGTTGAGGCACGAAAGCGTGG  
GGAGC  
>ASV:5472:Genus:Papillibacter  
TACGTAGGGAGCGAGCGTTGTCCGGATTTACTGGGTGTAAAGGGCGCGTAGGCGGGATGCAAGTCAGATGTGAAATCCC  
GGGGCTTAACCCGGAAGTGCATTTGAAACTGTTATTTCTTGAGTGATGGAGAGGCAAGTGAATTCCTAGTGTAGCGGTG  
AAATGCGTAGATATTAGGAGGAACACCCAGTGGCGAAGGCAGCTTCTGGACATTAAGTACGCTGAGGCACGAAAGCGTG  
GGGAG  
>ASV:5473:Class:Clostridia  
TACGTAGGGGCGAGCGTTGTCCGGAATTACTGGGCGTAAAGGGTGCCTAGGCGGTTGCTTAAGTTGGATGTGAAATACC  
CGGGCTTAACCTGGGGGTGCATTCAAGACTGGGGAAGTACAGGAGAGGGAAGCGGAATTCCTAGCGTAGCGGTG  
AAATGCGTAGATATTAGGAGGAACACCCGTTGGCGAAGGCAGCTTCTGGACTGACACTGACGCTGAGGCACGAAAGCGTG  
GGGAG  
>ASV:5474:Genus:Lachnospiraceae\_NK4B4\_group  
AACGTATGGTCAAGCGTTATCCGGATTTACTGGGTGTAAAGGGAGCGCAGGCGGAAGGCTAAGTCTGATATGAAAGCCC  
GGGGCTCAACCCGGGACTGCATTTGAAACTGTCCAGCTGGAGTACAGGAGAGGCGAGGCGGAATTCCTAGTGTAGCGGTG  
AAATGCTTAGATATACGAAGAAGTCCGATTGCGAAGGCAGCCTGCTAAGCTGCAACTGACATTGAGGCTCGAAAGTGTG  
GGTAT  
>ASV:5475:Family:Lachnospiraceae  
TACGTAGGGGCGAAGCGTTATCCGGATTTACTGGGTGTAAAGGGAGCGTAGACGGTAAAGCAAGTCTGGAGTGAAAACCC  
GGGGCTTAACCCGGGATTGCTTTGAAACTGTTGAACTGGAGTGCAGGAGAGGTAAGCGGAATTCCTAGTGTAGCGGTG  
AAATGCTTAGATATACGAAGAAGTCCGATTGCGAAGGCAGCTCACTGGACTGCAACTGACACTGATGCTCGAAAGTGTG  
GGTAT  
>ASV:5476:Genus:Erysipelotrichaceae\_UCG-003  
TACGGAGGATCCGAGCGTTATCCGGAATTATTGGGCGTAAAGAGGGAGCAGGCGGCACTAAGGGTCTGTGGTAAAAGATC  
GAAGCTTAACCTCGGTAAGCCATGAAACCGTAGAGCTTGAGTGTGTGAGAGGATCGTGAATTCCTAGTGTAGCGGTG  
AATGCGTAGATATATGGAGGAACACCCAGTGGCGAAGGCAGGCAACTGGGCTTTACTGACGCTGAGGCTCGAAAGTGTG  
GGAGC  
>ASV:5477:Class:Clostridia  
TACGTAGGGGCGAGCGTTGTCCGGAATTACTGGGCGTAAAGGGTGCCTAGGCGGTTGCTTAAGTTGGATGTGAAATACC  
CGGGCTTAACCTGGGGGTGCATTCAAGACTGGGGAAGTACAGGAGAGGGAAGCGGAATTCCTAGTGTAGCGGTG  
AAATGCGTAGATATTAGGAGGAACACCCGTTGGCGAAGGCAGCTTCTGGACTGACACTGACGCTGAGGCACGAAAGCGTG  
GGTAG  
>ASV:5478:Family:Ruminococcaceae  
TACGTAGGGAGCAAGCGTTGTCCGGATTTACTGGGTGTAAAGGGTGCCTAGGCGGGATCAAGTCAGACGTGAAATCCA  
TCGGCTTAACCTGATGAACTGCTTTGAAACTGGTATTTCTTGAGTGAGTACAGGCGAGGCGGAATTCCTAGTGTAGCGGTG  
GAATGCGTAGATATCGGAGGAACACCCAGTGGCGAAGGCAGGCTACTGGGCACCACTGACGCTGAGGCTCGAAAGTGTG  
GGTAG  
>ASV:5479:Family:Ruminococcaceae  
TACGTAGGTGGCAAGCGTTGTCCGGAATTACTGGGTGTAAAGGGAGCGTAGGCGGGAATCAAGTTGGATGTCTAATCTA  
CCGGCTTAACCGGATTCGCATTTCAAAGTGTATTTCTTGAGTGAAGTAGAGGCGAGGCGGAATTCCTAGTGTAGCGGTG  
AATGCGTAGATATTAGGAGGAACACCCGTTGGCGAAGGCAGGCTTACTGGACTGTAAGTACATTGAGGCTCGAAAGCGTG  
GGAGC  
>ASV:5480:Family:Clostridiaceae\_2  
TACGGAGGATCAAGCGTTATCCGGATTTATTGGGTTAAAGGGTGCCTAGGTTGGTTTCTTAAGTCAGAGGTGAAAGGCT  
ACGGCTCAACCGTAGTAAGCCTTTGAAACTGGGAACTTGAAGTGCAGGAGAGGAGAGTGAATTCCTAGTGTAGCGGTG  
AATGCGTAGATATTACGAAGAAGTCCGATTGCGAAGGCAGCTGCTAAGCTGCAACTGACATTGAGGCTCGAAAGTGTG  
GTATC  
>ASV:5481:Phylum:Firmicutes  
TACGTAGGGGCGAAGCGTTATCCGGATTTACTGGGTGTAAAGGGAGCGTAGACGGCATGGCAAGCCAGATGTGAAATCCC  
CGGGCTCAACCTGGGAACTGCATCTGATACTGGCAAGCTTGAAGTCTCGTAGAGGGGGGTAGAATTCAGGTGTAGCGGTG  
AAATGCGTAGATATATGGAGGAACACCCGTTGGCGAAGGCAGCTTCTGGTCTGTAAGTACGCTGAGGCTCGAAAGCGTG  
GGGAG  
>ASV:5482:Species:koreensis  
TACGAAGGGTCAAGCGTTACTCGGAATTACTGGGCGTAAAGCGTGCCTAGGTGGTTGTTAAGTCTGTGTAAGGCC  
TGGGCTCAACCTGGGAACTGCATGGAAGTGGGCGACTAGAGTGTGGTAGAGGTTAGCGGAATTCCTGGTGTAGCAGTG  
AAATGCGTAGATATCAGGAGGAACATCCATGGCGAAGGCAGCTACCTGGGCCAACACTGACACTGAGGCACGAAAGCGTG  
GGGAG  
>ASV:5483:Genus:Oscillibacter  
TACGTAGGGAGCGAGCGTTGTCCGGAATTACTGGGTGTAAAGGGAGCGTAGGCGGGATCGCAAGTCAGATGTGAAAACCTA  
TGGGCTTAACCCATAAAGTGCATTTGAAACTGTAGGTCTTGAGTACCGGAGAGGTTATCGGAATTCCTTGTGTAGCGGTG  
AAATGCGTAGATATAAGGAAGAACACCCAGTGGCGAAGGCAGGTAAGTGGACGGCAACTGACGCTGAGGTGCGAAAGCGTG  
GGTAG  
>ASV:5484:Family:Lachnospiraceae  
TACGTAGGGGCGAAGCGTTATCCGGATTTACTGGGTGTAAAGGGTGCCTAGGTTGGTATGGCAAGTCAGAAGTAAAACCTC  
AGGGCTTAACCTGGGACTGCTTTTGAAGTGTGACTGGTGTGACAGGAGAGGTAAGCGGAATTCCTAGTGTAGCGGTG  
AAATGCTTAGAGATCATAAGGAACACCCGATTGCGAAGGCAGCTTACCAAATATATCTGACGTTGAGGCACGAAAGCGTG  
GGGAG  
>ASV:5485:Genus:Bilophila

TACGGAGGGTGCAAGCGTTAATCGGAATCACTAGGCGTAAAGCGCACGTAGGCGGCTTGGTAAGTCAGGGGTGAAATCCC  
ACAGCCCAACTGTGGAAGTGCCTTTGATACTGCCAGGCTTGAAGTCCGAGAGGTAAGCGGAATTCCTAGTGTAGCGGTG  
AAATGCGTAGATATACGGAGGAACACCAGTGGCGAAGGCGGCTGCTGGACATTAACGACGCTGAGGCGCAAAGCGTG  
GGGAG

>ASV:5486:Family:Enterobacteriaceae

TACGTAGGGGGCAAGCGTTATCCGGATTTACTGGGTGTAAGGGAGCGTAGACGGCAGGCAAGTCAGATGTGAAATCCC  
CGGGCTCAACCTGGGAAGTGCATCTGATACTGGCGAGCTTGAAGTCTCGTAGAGGGGGTGAATTCAGGTGTAGCGGTG  
AAATGCGTAGAGATCTGGAGGAATACCGTGGCGAAGGCGGCCCCCTGGACGAAGACTGACGCTCAGGTGCAAAGCGTG  
GGGAG

>ASV:5487:Order:Clostridiales

TACGTAGGTCCCGAGCGTTGTCCGGATCTATTGGGCGTAAAGCGAGCGCAGGCGGTTTGATAAGTCTGAAGTTAAAGGCT  
ACGGCTCAACCGTAGTAAGCTTTGAAACTGGAGGACTTGAAGTGCAGGAGAGGAGAGTGAATTCCTAGTGTAGCGGTGA  
AATGCGTAGATATACGGAGGAACACCAGTGGCGAAGGCGGCTTACTGGACGGTAACGACGTTGAGGCTCGAAAGCGTG  
GGAGC

>ASV:5488:Family:Lachnospiraceae

AACGGAAAGGTCGGGCGTTATCCGGATTTATTGGGTTAAAGGGAGCGTAGGCCGGAGATTAAGCGTGTGTGAAATGTA  
GATGCTCAACATCTGGACTGCATTGAAACTGTCATACTTGAAGTCCGAGGAGGGTAAGCGGAATTCCTAGTGTAGCGGTG  
AAATGCGTAGATATTAGGAGGAACACCAGTGGCGAAGGCGGCTTACTGGACGGTAACGACGTTGAGGCTCGAAAGCGTG  
GGGAG

>ASV:5489:Kingdom:Bacteria

TACGTAGGATGCAAGCGTTATCCGGATTTACTGGGTGTAAGGGAGCGCAGGCGGCGGCTAAGTCAGTTGTGAAAGTTT  
GCGGCTCAACCGTAAATTCAGTTGATACTGGCGACTTGAAGTGCAGAGAGGTAAGCGGAATTCCTAGTGTAGCGGTG  
AAATGCGTAGATATATTAGGAGGAACACCAGTGGCGAAGGCGGCTTACTGGACGGTAACGACGTTGAGGCTCGAAAGCGTG  
GGGAG

>ASV:5490:Genus:Holdemanela

TACGTAGGTGGCGAGCGTTATCCGGATTTACTGGGCGTAAAGGGTGCAGTGGCAGATCAAGTCTGGAGTAAAAGGTA  
TGGGCTCAACCGTACTTGTCTGAAACTGATCAGCTAGAGAACAGGAGAGGACAGCGGAATTCAGGTGTAGGAGTGA  
AATCCGTAGATATCTGGAAGAACATCAGTGGCGAAGGCGGCTGCTGACCGGTATTGACGCTGAGGCGCAAAGCGTGG  
GTAGC

>ASV:5491:Family:Erysipelotrichaceae

TACGTAGGTCCCGAGCGTTGTCCGGATTTATTGGGCGTAAAGCGAGCGCAGGCGGTTTGATAAGTCTGAAGTTAAAGGCT  
GTGGCTCAACCATAGTTCGCTTTGAAACTGTCAAACCTTGAAGTGCAGAGAGGACAGCGGAATTCATGTGTAGCGGTAA  
AATGCGTAGATATATTGGAAGAACACCAGTGGCGAAGGCGGCTGCTGATCTGGATTCTGACACTGAAGCACGAAAGTGGC  
GGTAT

>ASV:5492:Family:Lachnospiraceae

AACGTAGGGTGAAGCGTTATCCGGATTTACTGGGTGTAAGGGAGCGTAGGTGGCAGTGAAGTCAGATGTGAGAGGCC  
GGGGCTCAACCCGGAGCTGCATTTGAAACTGCTCGGCTAGAGTACAGGAGAGGACAGCGGAATTCCTAGTGTAGCGGTG  
AAATGCGTAGATATTAGGAGGAACACCAGTGGCGAAGGCGGCTGCTGATCTGACACTGATGCTCGAAAGTGTG  
GGTAT

>ASV:5493:Genus:Eggerthella

TACGTAGGGAGCGAGCGTTATCCGGATTTACTGGGCGTAAAGAGCGCGTAGGCGGCTCTCAAGCGGGATCTCTAATCCG  
AGGGCTCAACCCCGGAGCTGCATTTGAAACTGGGAGGCTCGAGTTGAGTGCAGAGAGGACAGCGGAATTCCTAGTGTAGCGGTG  
AATGCTTAGATATACGAAGAACTCCGATTGCGAAGGCGGCTGCTGGACTGTAACGACGCTGATGCTCGAAAGTGTGG  
GTATC

>ASV:5494:Genus:Parabacteroides

TACGGAGGATCCGAGCGTTATCCGGATTTACTGGGTTAAAGGGAGCGTAGGTGGTTTTATTAAGTCAGCGGTGAAAGTTT  
GTGGCTCAACCATAAATGCGCTTTGAAACTGGTAACTTGAAGTATATTTGAGGTAGCGGAATGCGTGGTGTAGCGGTG  
AAATGCATAGATATATTAGGAGGAACACCAGTGGCGAAGGCGGCTCTGATCTGTAACGACGCTGAGGCTCGAAAGCGTG  
GGGAG

>ASV:5495:Family:Ruminococcaceae

AACGTAGGTCAACAAGCGTTGTCCGGAATTTACTGGGTGTAAGGGTGCAGTGGCGCTAGGCAAGTCAGACGTGAAAACCA  
TGGGCTCAACCTGTGGACTGCGTTTGAAGTGTGAACTGTTTACTGAGTGAAGTAGAGGTAGCGGAATTCCTAGTGTAGCGGTG  
AAATGCGTAGAGATTAGGAAGAACACCAGTGGCGAAGGCGGCTTCTGGACGAAAACGACGCTGAGGCGCAAAGCGTG  
GGGAG

>ASV:5496:Genus:Family\_XIII\_AD3011\_group

TACGTAGGGGGCAAGCGTTATCCGGATTTACTGGGCGTAAAGAGTACGTAGGTGGTTTTCTAAGCACGGGGTTAAAGGCA  
ATGGCTTAACCATTTGTCGCTTTGAAACTGGAAGACTTGAAGTGCAGGAGAGGAAAGCGGAATTCCTAGTGTAGCGGTG  
AATGCGTAGATATTAGGAGGAACACCAGTGGCGAAGGCGGCTTCTGGACGAAAACGACACTGAGGCGCAAAGCCAGG  
GGAGC

>ASV:5497:Genus:Oribacterium

TACGTAGGGGGCAAGCGTTATCCGGATTTACTGGGTGTAAGGGAGCGTAGACGGAATGGCAAGTCTGAAGTGAATACCC  
CGGGCTCAACCTGGGAAGTGCCTTTGAAACTGTTGTTCTAGAGTGTGGAGAGGTAAGTGAATTCCTAGTGTAGCGGTG  
AAATGCGTAGAGATTAGGAAGAACACCAGTGGCGAAGGCGGCTTCTGGACGAAAACGACACTGAGGCGCAAAGCGTG  
GGGAG

>ASV:5498:Family:Ruminococcaceae

TACGTAGGGGGCAAGCGTTGTCCGGATTTACTGGGTGTAAGGGTGCAGTGGCGGCTAGGCAAGTCAGACGTGAAAACCA  
TGGGCTCAACCTGTGGACTGCGTTTGAAGTGTGAACTGTTTACTGAGTGAAGTAGAGGTAGGCGGAATTCCTAGTGTAGCGGTG  
GAGTGTGTAGATATTAGGAGGAACACCAGTGGCGAAGGCGGCTTCTGGACGAAAACGACACTGAGGCGCAAAGCCAGG

GGGAG

>ASV:5499:Genus:Subdoligranulum

TACGGAGGGTGCAAGCGTTAATCGGAATTACTGGGCGTAAAGGCGCACGAGGCGGTCTGTCAAGTCGGATGTGAAATCCC  
CGGGCTCAACCCGTAATTGCTTTTAAACTGCTGGCCTTGAGTAGTGCAGAGGTAGGTGGAATTCCTAGTGTAGCGGTG  
GAATGCGTAGATATCGGGAGGAACACCAGTGGCGAAGGCGACCTACTGGGCACCAACTGACGCTGAGGCTCGAAAGCATG  
GGTAG

>ASV:5500:Family:Ruminococcaceae

AACGTAGGTCAACAAGCGTTGTCCGGAATTACTGGGTGTAAGGGAGCGTAGGCGGGTCAGCAAGTTGGATGTGAAATGTA  
CCGGCTCAACTGGTAACTGCATTCAAAACCTGTTGGTCTTGAGTGAAGTAGAGGCAGGCGGAATTCCTAGTGTAGCGGTG  
AAATGCGTAGATATTAGGAGGAACACCAGTGGCGAAGGCGCCTGCTGGCTTTTACTGACGCTGAGGCTCGAAAGCATG  
GGGAG

>ASV:5501:Family:Peptococcaceae

AACGTAGGTCAACAAGCGTTGTCCGGAATTACTGGGTGTAAGGGCGGTAGGCGGGAATTTAAGTAAGTGTGAAAACCTC  
CGGGCTTAACTGGAGACTGCACTTTAAACTGGATTTCTTGAGGGCAGGAGAGGAAAGTGAATTCCTAGTGTAGCGGTG  
AAATGCGTAGATATTAGGAGGAACACCAGAGGCGAAGGCGACTTCTGGACTGTAACGACACTGAGGCACGAAAGCGTG  
GGGAG

>ASV:5502:Kingdom:Bacteria

TACGTAGGGGCGAGCGTTGTCCGGAATTACTGGGCGTAAAGGGAGCGTAGGCGGTCTGATAAGTTGGATGTGGAATACC  
CGGGCTTAACTGGGGGTGCATCCAATACTGTTGGACTAGAGTACAGGAGAGGAAAGCGGAATTCCTAGTGTAGCGGTG  
AAATGCTTAGATATCACGAAGAACTCCGATTGCGAAGGCAGCTCACTAGACTGTCACGACACTGATGCTCGAAAGTGTG  
GGTAT

>ASV:5503:Order:Clostridiales

TACGTAGGGGCGAGCGTTGTCCGGAATTACTGGGCGTAAAGGGTGCCTAGGCGGCCCTGCAGTGCAGATGTGAAATACC  
CGTGCTTAACTGGGGCTGCATTTGAAACCGTAGGGCTTGAGTGTGGAAGAGGTAAGTGAATTCCTAGTGTAGCGGTG  
AAATGCGTAGAGATCGGGAGGAACACCAGTGGCGAAGGCGACTTACTGGGCACCAACTGACGCTGAGGCTCGAAAGCATG  
GGTAG

>ASV:5504:Family:Lachnospiraceae

AACGTAGGGGCGAAGCGTTATCCGGAATTACTGGGTGTAAGGGTGCCTAGGTGGTATGGCAAGTCAGAAGTAAAAGGCT  
GGGGCTCAACCCGGGACTGCTTTTGAACCTGTTGGCTAGAGTGCCTGGAGAGGTAAGCGGAATTCGTGGTGTAGCGGTG  
AAATGCTTAGATATCACGAAGAACTCCGATTGCGAAGGCAGCTTACTGGACTGTAACGACGCTGATGCTCGAAAGTGTG  
GGTAT

>ASV:5505:Order:Betaproteobacteriales

AACGTAGGTCAACAAGCGTTGTCCGGAATTACTGGGTGTAAGGGAGCGCAGGCGGGAAGACAAGTTGGAAGTAAAATCCA  
TGGGCTCAACTCATGAAGCTGCTTTCAAACCTGTTTTCTTGAGTAGTGCAGAGGGAGGTGGAATTCACGCTGAGCAGTG  
AAATGCGTAGATATGTTGAAGAAACCCGATGGCGAAGGCAGCTCCTGGGACATAACTGACGCTCAGGCACGAAAGCGTG  
GGGAG

>ASV:5506:Family:Family\_XIII

TACGTAGGGGCGAAGCGTTATCCGGAATTATTGGGCGTAAAGGGTACGTAGGCGGTTTAAATAAGCGTGAAGTAAAAGGCA  
ATGGCTTAACTATTGTAAGCCTTGCAGAACTGTTAGACTTGTAGTGCAGGAGAGGAAAGCGGAATTCCTAGTGTAGCGGTG  
AATGCGTAGATATTAGGAGGAACACCAGTGGCGAAGGCGGCTTCTGGACTGTAACGACGCTGATGTACGAAAGCGTGG  
GGAGC

>ASV:5507:Family:Ruminococcaceae

AACGTAGGCCACAAGCGTTGTCCGGAATTACTGGGTGTAAGGGAGCGCAGGCGGGCGATCAAGTTGGAAGTAAAATCCA  
TGGGCTCAACCCATGAATTGCTTTCAAACCTGTAGTTCTTGAGTGCCTGGAGAGGCAATCGGAATTCCTGTTGTAGCGGTG  
AAATGCGTAGATATACGGAGGAACACCAGTGGCGAAGGCGGATTGCTGGACAGTAACGACGCTGAGGCAGCAAGCGGTG  
GGGAG

>ASV:5508:Genus:Ruminococcaceae\_UCG-013

TACGTAGGTGGCAGCGTTGTCCGGAATTACTGGGTGTAAGGGCGAGTAGGCGGACACACAAGTCAGAAGTAAAATCTC  
TGGGCTTAAACCCAGAACTGCTTTTGAACCTGTATGCCTTGAGTGCCTGGAGAGGAAAGCGGAATTCCTAGTGTAGCGGTG  
AAATGCGTAGATATTAGGAGGAACACCAGTGGCGAAGGCGGCTTCTGGACGTTAACTGACGCTGAGGCAGCAAGCGGTG  
GGGAG

>ASV:5509:Family:Ruminococcaceae

TACGTAGGGGCGAAGCGTTGTCCGGAATTACTGGGTGTAAGGGAGCGCAGGCGGAGAAGCAAGTCAGTGGTAAAACGA  
TGGGCTTAACTCATCAACTGCCATTGAAACTGTTTCCCTTGAGTGAAGTAGAGGCAGGCGGAATTCAGTGTAGTGGTGTG  
AAATGCGTAGATATTGCGAGGAACACCAGTGGCGAAGGCGGCTGCTGGCTTTAACTGACGCTGAGGCTCGAAAGTGTG  
GGGAG

>ASV:5510:Genus:Ruminococcaceae\_UCG-008

TACGTAGGGAGCAAGCGTTATCCGATTTACTGGGTGTAAGGGCGAGTAGGCGGGCTGGTAAGTTGGGAGTAAAATCTC  
GGGGCTTAAACCCGAAACTGCTTTCAAACCTGCTGGTCTTGAGTGTAGGAGAGGCGGGAATTCCTAGTGTAGCGGTG  
AAATGCGTAGATATTGGGAGGAACACCAGTGGCGAAGGCGGCTGCTGGACATTAACGACGCTGAGGCAGCAAGCGGTG  
GGGAG

>ASV:5511:Genus:Angelakisella

TACGTAGGGAGCGAGCGTTGTCCGGAATTACTAGGTGTAAGGGAGCGTAGGCGGGAGTCAAGTTGGATGTGAAAACCA  
TGGGCTCAACCCATGACTGCATTCAAAACCTGATTTCTTGAGTGTAGAGGCAGGCGGAATTCCTAGTGTAGCGGTG  
CAATGCTTAGATATCACGAAGAACTCCGATTGCGAAGGCAGCTGCTAAGCTGCAACTGACATTGAGGCTCGAAAGTGTG  
GGTAG

>ASV:5512:Family:Rikenellaceae

TACGGAGGATCCGAGCGTTATCCGATTTATTGGGTTTAAAGGGTGCCTAGGCGGTCTGATAAGTTAGAGGTAAAATCCC

GGGGCTTAAC TCCGGAATTGCCTCTGATACTGTTGGGCTAGAGAGTAGTTGCGGTAGCGGAATTCGTGGTGTAGCGGTG  
AAATGCTTAGATATCACGAAGA AACTCCGATTGCGAAGGCAGCTTGCTGGACTGTAAC TGACGCTGATGCTCGAAAGTGTG  
GGTAT  
>ASV:5513:Family:Ruminococcaceae  
TACGGAGGATCCGAGCGTTATCCGGATTTATTGGGTTTAAAGGGAGCGTAGATGGATGTTTAAAGTCAGTTGTGAAATCTA  
TGGGCTCAACCCATAAACTGCATTTGAACTGTAGAGCTTAGTGAAGTAGAGGCAGCGGAATTCCTAGTGTAGCGGTG  
AAATGCGTAGAGATGGGAGGAACACCAGTGGCGAAGGCGGCTGCTGGGCTTAACTGACGCTGAGGCTCGAAAGTGTG  
GGTAG  
>ASV:5514:Genus:Lachnoclostridium  
TACGTAGGGGGCAAGCGTTATCCGGATTTGCTGGGTGTAAGGGAGCGCAGACGGCGATGCAAGTCTGAAGTAAAGCCC  
GGGGCTCAACCCCGGACTGCATTTGAACTGTAGAGCTTAGAGTGTGCGAGAGGAAAGCGGAATTCCTAGTGTAGCGGTG  
AAATGCGTAGATATTAGGAGGAACACCAGTGGCGAAGGCGGCTTACTGGACAGTAAC TGACGTTGAGGCTCGAAAGCGTG  
GGGAG  
>ASV:5515:Species:wenyonii  
AACATAGGTCACGAGCATTATCCGGATTTATTGGGCTAAAGGAAGCGTAGGCGGGGAGGTTGATCCATTGTTAAAAGCA  
TTTGCTTAACAAATGTGTGCATTGGAGATCGCTCCCTAGAGTTAATCAGGGGGTACTGGAATTCATGTGTAGCGGTGG  
AATGCGTAGATATTAGGAGAACACCAGGCTAAGGCGAGTACCTAGGATATAACTGACGCTGAGGCTTAAAAGCGTGG  
GGAGC  
>ASV:5516:Family:Lachnospiraceae  
TACGTATGGTGCAAGCGTTATCCGGATTTACTGGGTGTAAGGGAGCGTAGACGGATGGCAAGTCTGATGTGAAAACCC  
GGGGCTCAACCCCGGACTGCGTTGAAACTGTTTCATCTAGAGTGTGCGAGAGGTAAGTGGAAATTCCTAGTGTAGCGGTG  
AAATGCGTAGATATTAGGAGAACACCAGTGGCGAAGGCGACTTCTGGACGAAAAC TGACGCTGAGGCGCGAAAGCGTG  
GGGAG  
>ASV:5517:Family:Lachnospiraceae  
TACGTATGGAGCAAGCGTTATCCGGATTTACTGGGTGTAAGGGAGCGTAGACGGTTTGTCAAGTCTGATGTGAAATTC  
AGGGCTTAACCTGGACTGCATTGAAACTGTCAACTAGAGTGTGCGAGAGGTGAGTGGAAATTCCTAGTGTAGCGGTG  
AAATGCGTAGATATTAGGAGAACACCAGTGGCGAAGGCGGCTCACTGGACGATAACTGACGTTGAGGCTCGAAAGCGTG  
GGGAG  
>ASV:5518:Family:Ruminococcaceae  
TACGTAGGTGGCAAGCGTTGTCCGGATTTACTGGGTGTAAGGGCGTGCAGCCGGGCTGGTAAGTCAAGTGTGAAATCTG  
GAGGCTCAGCCTCAAACCTGCATTTGAACTGCTGGTCTTAGTGTGAGAGGCGAGCGGAATTCCTGTGTAGCGGTG  
AAATGCGTAGATATTAGGAGGAACACCAGTGGCGAAGGCGGCTGCTGGACATTAAC TGACGCTGAGGCGCGAGAGCGTG  
GGGAG  
>ASV:5519:Family:Lachnospiraceae  
TACGGAGGATTCAAGCGTTATCCGGATTTACTGGGTGTAAGGGAGCGTAGACGGCAAGCAAGTCTGAAGTAAAACCC  
AGGGCTCAACCTGGACTGCTTTGAAACTGTTTGTCTAGAGTGTGCGAGAGGTAGGTGGAAATTCCTAGTGTAGCGGTG  
AAATGCGTAGATATTAGGAGGAACACCAGTGGCGAAGGCGACGATCTGGCTGCAACTGACGCTCAGTCCGAAAGCGTG  
GGGAG  
>ASV:5520:Family:Lachnospiraceae  
TACGTATGGGGCAAGCATTATCCGGAATTTACTGGGTGTAAGGGAGCGTAGGCGGTACGGCAAGTCAAGTAAAAGCCT  
GGGGCTCAACCCGGAATTGCTTTTGAACCTGCGACTAGAGTGTGCGAGGGGTAAGCGGAATTCCTAGTGTAGCGGTG  
AAATGCTTAGATATCACGAAGA AACTCCGATTGCGAAGGCAGCTTACTGGACTGTAAC TGACGCTGATGCTCGAAAGTGTG  
GGTAT  
>ASV:5521:Order:Bacteroidales  
TACGGAGGATTCAAGCGTTATCCGGATTTATTGGGTTTAAAGGGAGCGTAGACGGCATGGCAAGCCAGATGTGAAAACCC  
AGGGCTCAACCTGGGATTGCATTTGAACTGTAGGCTGGAGTGCAGGAGAGGTAAAGCGGAATTCGTGGTGTAGCGGTG  
AAATGCTTAGATATCACGAAGA AACTCCGATTGCGAAGGCAGCTCACTGGACTGCAACTGACACTGATGCTCGAAAGTGTG  
GGTAT  
>ASV:5522:Phylum:Firmicutes  
TACGTAGGTGGCAAGCGTTGTCCGGAAATTTATTGGGCTAAAGCGCGCAGGCGGCTTCCCAAGCCCCTTTAAAAGTGC  
GGGGCTTAACCATTTGTCGCCCTGCGAACTGGGATACTTAGTGCAGGAGAGGAAAGCGGAATTCCTAGTGTAGCGGTG  
AATGCGTAGATATTAGGAGGAACACCAGTGGCGAAGGCGGCTTCTGGACTGAAACTGACACTGAGGCGCAAAAGTGTGG  
GGAGC  
>ASV:5523:Genus:Family\_XIII\_AD3011\_group  
TCCTTCTTTTCTCTCTTTCTCTTCTTCTTGGGCTAAAGAGTGCGTAGGTGGTAACTTAAAGCGCGGGGTTAAAGGCA  
ATGGCTTAACCATTTGTCGCCCTGCGAACTGGGATACTTAGTGCAGGAGAGGAAAGCGGAATTCCTAGTGTAGCGGTG  
AATGCGTAGATATTAGGAGGAACACCAGTGGCGAAGGCGGCTTCTGGACTGAAACTGACACTGAGGCGCAAAAGTGTGG  
GGAGC  
>ASV:5524:Family:Christensenellaceae  
TACGGAGGATTCAAGCGTTATCCGGATTTATTGGGCTAAAGGGTGCGTAGGCGGTTTGGTAAGTCAAGTGTGAAATACC  
CGGGCTTAACCCGGGGCTGCATCTGATACTGCAGACTTAGTGCAGGAGAGGAAAGCGGAATTCCTAGTGTAGCGGTG  
AAATGCGTAGATATTAGGAGGAACACCAGTGGCGAAGGCGGCTTCTGGACTGTAAC TGACGCTGAGGCGCGAAAGCGTG  
GGGAG  
>ASV:5525:Class:Bacteroidia  
TGCGTAGGATGCAAGCGTTATCCGGATTTATTGGGTTTAAAGGGAGCGTAGGTTGATTGTTAAGTCAAGTGTGAAAGTTT  
GCGGCTCAACCGTAAATGCAATTGACTGAGTGCAGTCTTGGAGTACAGTAGAGGTGGGCGGAATTCCTGGTGTAGCGGTG  
AAATGCGTAGAGATCGGAGGAACACCAGTGGCGAAGGCGGCTTCTGGACTGTAAC TGACGCTCATTCCGAAAGCGTG  
GGGAG

>ASV:5526:Family:Puniceicoccaceae  
TACGGAGACTACGAGCGTTACTCGGATTCCTGCGGCTAAAGGGAGCGCAGGCGGGATAGTGTGTTAGGTGTGAAATGCC  
GGGGCTTAACCTCGGAGCTGCGCTAAACATATTCTAGAGTGTGGAGAGGTAAAGCGGAATTTCCGGTGTAGCGGTA  
AAATGCGCAGATATCGGAAGGAACACCGAAGGCGAAGGCAGCTTACTGGACAGAACTGACGCTCATGCTCGAAAGCGTG  
GGAG

>ASV:5527:Family:Family\_XIII  
TACGTAGGGGGCGAGCGTTATCCGGAATTATTGGGCGTAAAGAGTACGTAGGCGGTCTTTAAAGCGTAGGGTATAAGGCA  
GTGGCTCAACATTGTTGGCCTGCGAACTGGAGGACTTGTAGTATCGGAGAGGGAAGCGGAATTCCTAGTGTAGCGGTGA  
AATGCGTAGATATTAGGAGGAACACCAAGTGGCGAAGGCGGATTGCTGGACGACAACTGACGTTGAGGCGCAAAGCGTGG  
GGAG

>ASV:5528:Order:Clostridiales  
TACGTAGGGGGCTAGCGTTATCCGGAATTACTGGGCGTAAAGGGTGCCTAGGTGGTTTCTTAAGTCAGATGTGAAATCTA  
TGGGCTCAACCATAAACTGCATTTGAACTGCATAGCTAGAGTACAGGAGAGGCGAGGCGGAATTCCTAGTGTAGCGGTG  
AAATGCGTAGATATTAGGAGGAACACCAAGTGGCGAAGGCGGCTGCTGGACTGTTACTGACACTGAGGCACGAAAGCGTG  
GGAG

>ASV:5529:Kingdom:Bacteria  
TACGTAGGGGGCAAGCGTTGTCCGGAATGATTGGGCGTAAAGGGCGCGTAGGCGGCTGGTAAGTTTGAAGTAAAAGTCC  
TTCTTTAAAGGAGGGAATTGCTTTGGATACTGCCAGGCTTGTAGTACCAGGAGAGGGTGGCGGAATTCCTAGTGTAGCGGTG  
AAATCCGTAGATATCGGAGGAACACCAATGGCGAAGGCGGCTCTCTGGCCGCTACTGACGCTGAGGAGCGAAAGCGTG  
GGAG

>ASV:5530:Family:Ruminococcaceae  
TACGTAGGGAGCGAGCGTTGTCCGGAATTACTGGGTGTAAGGGTGCCTAGGCGGCGAGGCAAGTCAGGCGTAAAATCCA  
TCGGCTTAACCGATGAACCTGCGCTTGAACCTGCTCTGAGTGAAGCAGAGGCGAGGCGGAATTCCTAGTGTAGCGGTG  
AAATGCGTAGATATCGGAGGAACACCAAGTGGCGAAGGCGGCTGCTGGCTTTAACTGACGCTGAGGCACGAAAGCGTG  
GGAG

>ASV:5531:Order:Clostridiales  
TACGGAGGATGCGAGCGTTGTCCGGAATGATTGGGCGTAAAGGGCGCGTAGGCGGCTGGTAAGTTTGAAGTAAAAGTCC  
TTCTTTAAAGGAGGGAATTGCTTTGAACTGCTGACTAGAGTGTGCGGAGGGTAAGCGGAATTCCTAGTGTAGCGGTG  
AAATGCGTAGATATTAGGAGGAACACCAAGTGGCGAAGGCGGCTGCTGGACGAAGACTGACGCTGAGGCACGAAAGCGTG  
GGTAG

>ASV:5532:Genus:Bacteroides  
TACGTAGGTGGCAAGCGTTGTCCGGAATTACTGGGTGTAAGGGAGCGTAGGCGGGATGCCAAGTCAGCTGTGAAAACCTA  
TGGGCTTAACCTGTAGACTGCAGTTGATACTGGCAGTCTTGTAGTGCAGTAGAGGTGGGCGGAATTCGTGGTGTAGCGGTG  
AAATGCTTAGATATCACGAAGAACTCCGATTGCGAAGGCGAGCTACTGGAGTGAAGTACGCTGATGCTCGAAAGTGTG  
GGAG

>ASV:5533:Family:Ruminococcaceae  
TACGTAGGGGGCAAGCGTTATCCGGAATTACTGGGTGTAAGGGAGCGTAGACGGCAAGGCAAGTCAGATGTGAAATCCA  
TGGGCTCAACCCATGAACCTGCATTTGAACTGTAGATCTTGTAGTGTGCGGAGGGCAATCGGAATTCCTAGTGTAGCGGTG  
AAATGCGTAGATATTAGGAGGAACACCAAGTGGCGAAGGCGGCTGCTGGCTTTTACTGACGCTGAGGCTCGAAAGCGTG  
GGAG

>ASV:5534:Family:Lachnospiraceae  
AACGTAGGTACAAGCGTTGTCCGGAATTACTGGGTGTAAGGGAGCGTAGGCGGTAAGACAAGTCAGAAGTAAAAGGCT  
GGGGCTCAACCTGGGACTGCATTGAAACTGTCTGGCTCGAGTGCCGAGAGTAAGCGGAATTCCTAGTGTAGCGGTG  
AAATGCGTAGATATTAGGAAGAACACCAAGTGGCGAAGGCGGCTTACTGGACGTTAAGTACGCTGAGGCTCGAAAGCGTG  
GGAG

>ASV:5535:Order:Bacteroidales  
TACGGAGGATGCGAGCGTTATCCGGAATTTATTGGGTTAAAGGGTGCCTAGGTGGTATTTAAGTCAGCGGTGAAAATTT  
GTGGCTCAACCATAAAATTGCCGTTGAACTGGGTTACTTGTAGTGTGTTTGTAGGTAGGCGGAATTCACGCTGTAGCGGTG  
AAATGCGTAGATATTAGGAGGAACACCGTGGCGAAGGCGGCTCTCTGGTCTGTAAGTACGCTGAGGCTCGAAAGCGTG  
GGAG

>ASV:5536:Family:Lachnospiraceae  
TACGTATGGTCAAGCGTTATCCGGAATTTACTGGGTGTAAGGGAGCGCAGGCGGTGTGGCAAGTCTGATGTGAAAGGCA  
TGGGCTCAACCTGTGGACTGCATTGAAACTGTCAATCTAGAGTACCAGGAGAGGTAAGCGGAATTCCTAGTGTAGCGGTG  
AAATGCGTAGATATCACGAAGAACTCCGATTGCGAAGGCGAGCTGCTAAGTGCACCTGACATTGAGGCTCGAAAGTGTG  
GGTAT

>ASV:5537:Order:Clostridiales  
TACGTAGGGGGCGAGCGTTGTCCGGAATTACTGGGCGTAAAGGGTGCCTAGGCGGCTGAAAAGTCCGATGTGAAAGACC  
CGTGCTTAACATGGGGTTGCATCCGAACTTTCCGGCTTGTAGTGCAGGAGAGGCAAGTGGAAATTCACAGTGTAGCGGTG  
AAATGCGTAGATATTGGGAGGAACACCAAGTGGCGAAGGCGACTTGTGGGCCCAACTGACACTGAAGCACGAAAGCGTG  
GGAG

>ASV:5538:Genus:Erysipelatoclostridium  
TACGTAGGTGGCAGCGTTATCCGGAATCATTGGGCGTAAAGAGGGAGCAGGCGGCGAGTGCAGGCTGCGGTGAAAGACC  
GGAGCTAAACCTCGGTAAGCCGTGAAACCGCACAGCTAGAGAGCATCAGAGGATCGCGGAATTCATGTGTAGCGGTGA  
AATGCGTAGATATTAGGAGGAACACCAAGTGGCGAAGGCGGCTTACTGGACGTTAACTGACGTTGAGGCTCGAAAGCGTG  
GGAG

>ASV:5539:Family:Lachnospiraceae  
TACGTAGGTGGCAAGCGTTATCCGGAATTTACTGGGTGTAAGGGCGGTGTAAGGCGGATCGCAAGTCAGATGTGAAAGGCC  
GGGGCTCAACCCGGTACTGCATTGAAACTGTCTGACTAGAGTGTGCGGAGGGTAAGCGGAATTCACGCTGTAGCAGT



AAATGCGTAGATATGTGGAAGAACACCGATGGCGAAGGCAGCCTCTGGGACATAACTGACGCTCAGGCACGAAAGCGTG  
GGGAG  
>ASV:5540:Genus:Caproiciproducens  
TACGTAGGGAGCGAGCGTTTCCGGAATTAAGGGTGTAAAGGGTGCCTAGGCGGGGTACCAAGTCAGGCGTAAAACTA  
TCGGCTCAACCGGTAGCCTGCGTTTAAAACTGGTAGTCTTGGAGTGGAGTAGAGGCAGACGGAATTCGCGGTGTAGCGGTG  
AAATGCGTAGAGATCGGGAGGAACACCAAGTGGCGAAGGCGGTCTGCTGGGCTTAACTGACGCTGAGGCACGAAAGCGTG  
GGGAG  
>ASV:5541:Genus:Asaccharospora  
TACGTAGGGTGCAGCGTTAATCGGAATTAAGGGTGTAAAGGGTGCCTAGGCGGTCTTTAAAGTCAGGAGTAAAAGGCT  
ACGGCTCAACCGTAGTAAGCTCTTAAAACTGGAGGACTTGGAGTGCAGGAGAGAGAGTGAATTCGCGGTGTAGCGGTGG  
AATGCGTAGATATCGGGAGGAACACCAAGTGGCGAAGGCGGCTACTGGGCACCAACTGACGCTGAGGCTCGAAAGTGTGG  
GTAGC  
>ASV:5542:Order:Bacteroidales  
TACGGAGGATTCGAGCGTTATCCGGATTTATTGGGTTTAAAGGGAGCGTAGGCGGGTGTAAAGTCAGTGTGAAAAGTTT  
GTGGCTCAACCGTAAAATTGCAGTTGATACTGGCGACTTGGAGTGAACAGAGGTAGGCGGAATTCGTTGGTGTAGAGGTG  
AAATTCGTAGATATTGGGTAGAACACCAAGGCGAAGGCGGCTATCTGGGCATTGATTGACGCTGAGGCACGAAAGCATG  
GGGAT  
>ASV:5543:Family:Ruminococcaceae  
TACGTAGGGAGCAAGCGTTATCCGGATTTACTGGGTGTAAAGGGCGGTAGGCGGGACAGCAAGTCAGATGTGAAAACCTA  
TGGGCTCAACCCATAGCCTGCATTTGAAACTGTTGTTCTTGGAGTGCAGGAGGCAAATGGAATCCTAGTGTAGCGGTG  
AAATGCGTAGATATTAGGAAGAACACCAATGGCGAAGGCGAGTCTCTGGGCCGTTACTGACGCTGAGGAGCGAAAGCGTG  
GGGAG  
>ASV:5544:Genus:Ruminococcaceae\_UCG-005  
TACGTAGGGAGCAAGCGTTTCCGGATTTACTGGGTGTAAAGGGCGGTAGGCGGAGATGCAAGTTGGGAGTGAATCCA  
TGGGCTCAACCCATGAACTGCTCTCAAACTGTATCCCTTGGAGTATCGGAGAGGTAAGTGAATTCCTAGTGTAGCGGTG  
AAATGCGTAGATATTGGGAGGAACACCAAGTGGCGAAGGCGGCTACTGGACGATGACTGACGTTGAGGCTCGAAAGCGTG  
GGGAG  
>ASV:5545:Genus:Ruminococcaceae\_UCG-013  
TACGTAGGTGGCAAGCGTTTCCGGATTTACTGGGTGTAAAGGGCGGTAGGCGGACTGTCAAGTCAGTGTGAAAATACC  
GGGGCTTAAACCCGGGCTGCGATTGAAACTGACAGCCTTGGAGTATCGGAGAGGAAAGCGGAATTCCTAGTGTAGCGGTG  
AAATGCGTAGATATCAGGAAGAACCCGATTGCGAAGGCGAGTCTACTAGACTGTTACTGACACTGATGCTCGAAAGTGTG  
GGGAG  
>ASV:5546:Family:Lachnospiraceae  
TACGGAGGATCCGAGCGTTATCCGAATTTACTGGGTGTAAAGGGAGCGTAGACGGCTGTGTAAGTCTGAAGTGAAGCCC  
GGGGCTCAACCCGGGACTGCTTTGAAACTATGCAGCTAGAGTGTGCGGAGAGGTAAGTGAATTCCTAGTGTAGCGGTG  
AAATGCGTAGATATTAGGAGGAACACCAAGTGGCGAAGGCGGCTTTCTGGACTGAAACTGACACTGAGGCACGAAAGCGTG  
GGGAG  
>ASV:5547:Order:Clostridiales  
TACGGAGGATCCGAGCGTTATCCGGAATTAAGGGTGTAAAGGGTGCCTAGGCGGCACGGCAAGTTTGTGTAACCCCA  
TAGGCTTAACTGTGGCATGCATCAAAAACCTACCGAGCTAGAGTGCAGGAGAGGAAAGCGGAATTCCTAGTGTAGCGGTG  
AAATGCGTAGATATTAGGAAGAACACCAAGTGGTGAAGGCGGCTTTCTGGACTGCAACTGACGCTGAAGCACGAAAGCGTG  
GGGAG  
>ASV:5548:Family:Veillonellaceae  
TACGTAGGGTGAAGCGTTATCCGGAATTTATGGGCGTAAAGGACTCGTAGGCGGATTGGTCAGTCTGTCTTAAAAGTTT  
GGGGCTTAAACCCGTGATGGGATGAAACTGCCAATCTAGAGTATCGGAGAGGAAAGTGAATTCCTAGTGTAGCGGTGA  
AATGCGTAGATATCGGGTGAACACCGGTGGCGAAGGCGGCTCTGGGCGAGACCGCTGAGGCGCGAAAGCTGGG  
GGAGC  
>ASV:5549:Genus:Leuconostoc  
TACGTATGTCCCGAGCGTTATCCGGATTTATTGGGCGTAAAGCGAGCGCAGACGGTTTATTAAGTCTGATGTGAAAAGCCC  
GGAGCTCAACTCCGGAATGGCATTGAAACTGGTTAACTTGGAGTGCAGTAGAGGTAAGTGAATTCCTAGTGTAGCGGTG  
GAATGCGTAGATATAGGAAGAACACCAAGTGGCGAAGGCGGCTACTGGACTGCAACTGACGTTGAGGCTCGAAAGCGTG  
GGGAG  
>ASV:5550:Family:Clostridiales\_vadinBB60\_group  
TACGGAGGATCCAAGCGTTATCCGGAATGACTGGGCGTAAAGGGTGCCTAGGTTGGCTTGGCAAGTTGGTAGCGTAATTC  
GAGGCTCAACCTCGGCGCTACTACAAAACCTGTCAGGCTCGAGTGCAGGAGGGGTAAGTGAATTCCTAGTGTAGCGGTG  
AAATGCGTAGATATTAGGAGGAACACCAAGTGGCGAAGGCGGCTACTGGACGATGACTGACGTTGAGGCTCGAAAGCGTG  
GGGAG  
>ASV:5551:Order:Clostridiales  
TACGGAGGATCCGAGCGTTATCCGGATTTACTGGGTGTAAAGGGTGCCTAGGTTGGCAGTGCAGTGCAGATGTGAAAAGGCC  
GGGGCTCAACCCGGAGCTGCATTTGAAACTGCTCGGCTAGAGTACAGGAGAGGTAGGCGGAATTCGCGGTGTAGCGGTG  
GAATGCGTAGATATCGGGAGGAACACCAAGTGGCGAAGGCGGCTACTGGGCACTAACTGACGCTGAGGCTCGAAAGCATG  
GGTAG  
>ASV:5552:Genus:Butyricimonas  
TACGGGGATGCGAGCGTTATCCGGATTTATTGGGTTTAAAGGGCGGCTAGGCGGGACGCCAAGTCAGCGGTAAAAGACT  
GCAGCTAAACTGTAGCACCGGTTGAAACTGGCGACTTGGAGCAGAGCAGGGAGGCGGAACAAGTGAAGTACGCGGTGA  
AATGCTTAGATATCAGGAGAACTCCGATCGCGCAGGCATTGACCGGGCATTACTGACGCTGAGGCTCGAAAGTGGCG  
GTATC  
>ASV:5553:Kingdom:Bacteria

TACGTATGTCGCAAGCGTTATCCGGAATTACTGGGTGTAAAGGGTGCCTAGGTGGTATGGCAAGTCAGAAGTGAAAACCC  
AGGGCTTAACCTGGGACTGCATTGAAAAGTGTCTGGCTCGAGTGCCGGAGAGGTAAGCGGAATTCGTGGTGTAGCGGTG  
AAATGCTTAGATATCACGAAGAACCCTGATTGCGAAGGCAGCCTGCTAAGCTGCAACTGACATTGAGGCTCGAAAGTGTG  
GGTAG

>ASV:5554:Family:Lachnospiraceae

TACGTAGGGGGCAAGCGTTATCCGGATTTACTGGGTGTAAAGGGAGCGTAGACGGCTTAGCAAGTCTGAAGTAAAAGCCC  
GGGGCTCAACCCCGGACTGCATTGAAAAGTGTCTTTTCTAGAGTGTCCGGAGAGGTAAGTGAATTCCTAGTGTAGCGGTG  
AAATGCATAGATATCACGCAGAACCCCGATTGCGAAGGCAGCATACTGGGCTATAACTGACGCTGAAGCACGAAAGCGTG  
GGTAT

>ASV:5555:Family:Lachnospiraceae

TACGTAGGGTGAAGCGTTATCCGGATTTACTGGGTGTAAAGGGAGTGTAGGTGGCCAGGCAAGTCTGAAGTAAAAGCCC  
GGGGCTCAACCCCGGACTGCATTGAAAAGTGTCTGAGCTAGAGTGTCCGGAGAGGCAAGTGAATTCCTAGTGTAGCGGTG  
AAATGCATAGATATCACGCAGAACCCTGATTGCGAAGGCAGCTTACTAAACCATAACTGACACTGAAGCACGAAAGCGTG  
GGGAG

>ASV:5556:Kingdom:Bacteria

TACGTAGGGGGCAAGCGTTGTTCCGGAATTACTGGGCGTAAAGGGAGTGTAGGCGGTTATGTAAGATAGTGGTAAAATCCC  
AGAGCTTAACCTTGGAAATGCCATTATGACTATGTGGCTAGAATTACAGAGAGGATAGTGAATACCCAGTGTAGAGGTG  
AAATGCTTAGATATCACGAAGAACCCTGATTGCGAAGGCAGCTCACTGGACTGTTACTGACACTGAGGCTCGAAAGTGTG  
GGTAT

>ASV:5557:Family:Lachnospiraceae

TACGTATGGTGAAGCGTTATCCGGATTCATTGGGCGTAAAGCGCGCTAGGCGGCCCTAAGCGGAACCTCTAATCCC  
GGGGCTCAACCCCGGAGCTGCATTGAAAAGTGTCTGGCTAGAGTACAGGAGAGGCAGGCGGAATTCCTAGTGTAGCGGTG  
AAATGCGTAGATATTAGGAGGAACACCAAGTGGCGAAGGCGGCTGCTGGACTGTAAGTGAAGTGAAGGCTCGAAAGCGTG  
GGGAG

>ASV:5558:Family:Enterobacteriaceae

TACGGAGGGTGAAGCGTTAATCCGGAATTACTGGGCGTAAAGCGCACGCAGGCGGTTTGTAAAGTCAAGTGTAAAATCCC  
CGGGCTCAACCTGGGAACTGCATCTGATACTGACAAGCTTAGTCTCGTAGAGGGGGTGAATTCAGAGTGTAGCGGTG  
AAATGCGTAGATATTCCGAGGAACACCGGTGGCGAAGGCGGCAACTGGGCTTAACTGACGCTGAGGCTCGAAAGTGTG  
GGGAG

>ASV:5559:Species:concisus

TACGGAGGGTGAAGCGTTACTCCGGAATCACTGGGCGTAAAGGACGCGTAGGCGGATTATCAAGTCTCTTGTGAAATCCC  
ATGGCTTAACCATAGAAGTGCCTTGGGAACTGTAATCTAGAGTGAAGGAGAGGCAGATGGAATTTGGTGGTGTAGGGGTA  
AAATCCGTAGATATCACGAGGAATACCCATTGCGAAGGCAGTCTGCTGGAACCTCAACTGACGCTAATGCGTGAAGCGTG  
GGGAG

>ASV:5560:Genus:Howardella

TACGTATGGGGCAAGCGTTATCCGGATTTACTTGGTGTAAAGGGAGTGTAGGCGGAGTACAAGTCAAGTCAAGGAGTAAAATCCC  
GGGGCTCAACCCCGGAGCTGCATTTGAAAAGTGTACAGCTAGAGTGTAGGAAGGGCAAGCGGAATTCCTGGTGTAGCGGTG  
AAATGCGTAGATATTAGGAGGAACACCAAGTGGCGAAGGCAGCTTCTGGACAGTAACTGACGTTGAGGCACGAAAGTGTG  
GGGAG

>ASV:5561:Class:Actinobacteria

TACGTAGGGAGCAAGCGTTATCCGGATTTATTGGGTGTAAAGGGTGCCTAGGCGGTTTGTAAAGTGTAGAGTGTAAAATCCC  
GGGGCTCAACCCCGGAGCTGCATTTGAAAAGTGTACAGCTAGAGTGTAGGAGAGGCAAGCGGAATTCCTGGTGTAGCGGTG  
GAATGCGTAGATATCCGGAAGAACACCAATGGCGAAGGCAGGCTCTCTGGGCGTTACTGACGCTGAGGAGCGAAAGCGTG  
GGGAG

>ASV:5562:Family:Lachnospiraceae

TACGTATGGAGCAAGCGTTATCCGGATTTACTGGGTGTAAAGGGTGCCTAGGTGGCAGTGAAGTCAAGTCAAGTGTAAAAGGCC  
GGGGCTCAACCCCGGAGCTGCATTTGAAAAGTGTCTCGGCTAGAGTACAGGAGAGGCAGGCGGAATTCCTGGTGTAGCGGTG  
AAATGCGTAGATATGGGAGGAACACCAAGTGGCGAAGGCAGCTTCTCTGGACTGTAAGTGAAGTGAAGGCTCGAAAGCGTG  
GGGAG

>ASV:5563:Order:Clostridiales

TACGTAGGTGGCAAGCGTTGTCGGGATTTATTGGGCGTAAAGCGCGCAGGCGGCTTCCCAAGTCCCTCTTAAAAGTGC  
GGGGCTTAACCCGAGGATTGCATTTGAAAAGTATCAAGCTAGAGTACAGGAGAGGAAAGCGGAATTCCTAGTGTAGCGGTG  
AAATGCGTAGATATTAGGAAGAACACCAAGTGGCGAAGGCAGCTTCTGGACTGAAAAGTGAAGTGAAGGCTCGAAAGCGTG  
GGGAG

>ASV:5564:Family:Lachnospiraceae

TACGTAGGGAGCAAGCGTTGTCGGGATTTACTGGGTGTAAAGGGAGCGTAGACGGCTGTGCAAGTCTGAAGTAAAAGGCC  
TGGGCTCAACCTGTGGACTGCTTTGAAAAGTGTGACGCTAGAGTGTCCGGAGAGGTAAGTGAATTCCTAGTGTAGCGGTG  
AAATGCGTAGAGATTAGGAAGAACACCGGTGGCGAAGGCAGCTTCTCTGGACTGAAAAGTGAAGTGAAGGCTCGAAAGCGTG  
GGGAG

>ASV:5565:Order:Bacteroidales

TACGTAGGGAGCAAGCGTTATCCGGATTTATTGGGTGTAAAGGGTGCCTAGACGGGAAGGTAAGTGTAGTGTAAAATCCC  
TCCGCTCGACCTAAAATTGACAGTGTACTGGCAGTCTTAGTGTAGTGTAGGAGGAGGCGGAATTCGTGGTGTAGCGGTG  
AAATGCTTAGATATCACGAAGAACCCTGATTGCGAAGGCAGCTTCTGGACTGAAAAGTGAAGTGAAGGCTCGAAAGCGTG  
GGTAT

>ASV:5566:Family:Lachnospiraceae

TACGTAGGGGGCAAGCGTTATCCGGATTTACTGGGTGTAAAGGGTGCCTAGGTGGTATGGCAAGTCTGAAGTAAAAGCCC  
AGGGCTTAACCTGGGACTGCTTTTGGAAAAGTGTGACACTAGAGTGTAGGAGAGGTAAGTGAATTCCTAGTGTAGCGGTG  
AAATGCGTAGATATCCGGAAGAACACCAATGGCGAAGGCAGGCTCTCTGGGCGTTACTGACGCTGAGGAGCGAAAGCGTG

GGGAG

>ASV:5567:Genus:Roseateles

TACGTAGGGTCAAGCGTTAATCGGAATTACTGGGCGTAAAGCGTGCAGCGGTTATGCAAGACAGATGTGAAATCCC  
CGGGCTCAACCTGGGAAGTGCATTTGTGACTGCATGGCTAGAGTACGGTAGAGGGGGATGGAATTCGCGTGTAGCAGTG  
AAATGCGTAGATATGCGGAGGAACACCGATGGCGAAGGCAATCCCCTGGACCTGTACTGACGCTCATGCACGAAAGCGTG  
GGGAG

>ASV:5568:Genus:Abiotrophia

TACGTAGGTGCGAGCGTTGTCCGGATTTATTGGGCGTAAAGGGAGTGTAGCGGCTTTTTAAGTCTGATGTGAAAGCCC  
ACGGCTCAACCGTGGAGGGTATTGGAACTGGGAGACTTGAGCGCAGAAGAGGAGAGCGGAATTCATGTGTAGCGGTG  
AAATGCGTAGATATATGAGGAACACCCAGTGGCGAAGGCGGCTCTCTGGTCTGTAACGACGCTGAGGCTCGAAAGCGTG  
GGGAG

>ASV:5569:Family:Lachnospiraceae

TACGGAGGATCCGAGCGTTATCCGGATTTATTGGGTTAAAGGGAGCGTAGATGGATGTTTAAAGTCAAGTGTGAAAGTTT  
GCGGCTCAACCGTAAAATTGCGTTGAACTGTATGGCTAGAGTGTGGAGAGGCAAGCGGAATTCCTAGTGTAGCGGTG  
AAATGCGTAGATATTAGGAAGAACACCCAGTGGCGAAGGCGGCTTCTGGTCTGTAACGACGCTCAGGCTCGAAAGCGTG  
GGGAG

>ASV:5570:Genus:Lactonifactor

TACGGAGGATCCGAGCGTTATCCGGATTTATTGGGTGTAAGGGAGCGTAGACGGCAGTGAAGTCTGAAGTAAAAGCCC  
GGGGCTCAACCCCGGACTGCTTTGAAACTGTGCAGCTAGAGTGTGGAGAGGCAAGCGGAATTCCTAGTGTAGCGGTG  
AAATGCGTAGATATATGAGGAACACCCGGTGGCGAAGGCGGCTCTCTGGTCTGTAACGACGCTGAGGCTCGAAAGCGTG  
GGGAG

>ASV:5571:Genus:Intestinimonas

TACGGAGGATCCGAGCGTTATCCGGATTTATTGGGTGTAAGGGCGTGTAGGCGGGAAGGCAAGTCAAGTGTGAAAACCTA  
TGGGCTCAACCCATAGCCTGCATTTGAAACTGTTTTCTTGTAGTGTGGAGAGGCAATCGGAATTCGTTGTGTAGCGGTG  
AAATGCGTAGATATACGGAGGAACACCCAGTGGCGAAGGCGGCTCACTAGACTGTTACTGACACTGATGCTCGAAAGTGTG  
GGTAT

>ASV:5572:Kingdom:Bacteria

TACGTAGGTCCCGAGCGTTATCCGGATTTATTGGGCGTAAAGCGAGCGCAAGCGGTTAGATAAGTCTGAAGTTAAAGGCT  
GTGGCTTAACCATAGTACGCTTTGAAACTGTTAACTTGTAGTGCAGAAGGGGAGAGTGAATTCATGTGTAGCGGTGA  
AATGCATAGATATCACGCAGAACCCCGATTGCGAAGGCGGCTGCTAGGGTGCACAGACGCTGAGGCACGAAAGCGTGG  
GTATC

>ASV:5573:Genus:Flavonifractor

TACGGAGGATCCGAGCGTTATCCGGATTTATTGGGTGTAAGGGCGTGTAGGCGGGATTGCAAGTCAAGTGTGAAAACCTG  
GGGGCTCAACCTCCAGCCTGCATTTGAAACTGTAGTCTTGTAGTGTGGAGAGGCAATCGGAATTCGTTGTGTAGCGGTG  
AAATGCGTAGATATACGGAGGAACACCCAGTGGCGAAGGCGGCTTACTAACCTGTAACGACATTGATGCTCGAAAGTGTG  
GGTAT

>ASV:5574:Order:Bacteroidales

TACGGAGGATCCGAGCGTTATCCGGATTTATTGGGTTAAAGGGAGCGTAGGCGGGATCGCAAGTCAAGTGTGAAAACCC  
AGGGCTTAACCTGGGACTGCATTGAAACTGTCTGGCTTGTAGTGCAGAGAGGTAAGCGGAATTCCTAGTGTAGCGGTG  
AAATGCATAGATATCACGCAGAACCCCGATTGCGAAGGCGGCTGCTAGGGTGCACAGACGCTGAGGCACGAAAGCGTGG  
GGTAT

>ASV:5575:Family:Ruminococcaceae

TACGTAGGGAGCAAGCGTTGTCCGGATTTACTGGGTGTAAGGGTGCCTAGGCGGAACTGCAAGTCAAGTGGTGAATCTG  
AGGGCTCAACCTCAAAGTGCATTGAAACTGTGGTCTTGTAGTGAAGTAGAGGTAGGCGGAATTCCTGGTGTAGCGGTG  
AAATGCGTAGAGATCAGGAGGAACATCGTGGCGAAGGCGGCTTACTGGGCACCAACTGACGCTGAGGCTCGAAAGCGTG  
GGGAG

>ASV:5576:Family:Ruminococcaceae

AACGTAGGTCAACAAGCGTTGTCCGGATTTACTGGGTGTAAGGGAGCGCAGGCGGGAAGACAAGTTGGAAGTGAATCTA  
TGGGCTTAACCCATAAACTGCTTTCAAACCTGTTTTCTTGTAGTGTAGGAGGTAAGCGGAATTCCTAGTGTAGCAGTG  
AAATGCGTAGATATTTGGAAGAACACCAATGGCGAAGGCGGCTTACTGGGATGCGACTGACGCTCATGCACGAAAGCGTG  
GGGAG

>ASV:5577:Genus:Flavonifractor

TACGGAGGATCCGAGCGTTATCCGGATTTACTGGGTGTAAGGGCGTGTAGGCGGGATTGCAAGTCAAGTGTGAAAACCTG  
GGGGCTCAACCTCCAGCCTGCATTTGAAACTGTAGTCTTGTAGTGTGGAGAGGCAATCGGAATTCGTTGTGTAGCGGTG  
AAATGCGTAGATATCACGAAGAACCCGATTGCGAAGGCGGCTTACTAACCTGCAACTGACATTGAGGCTCGAAAGTGTG  
GGTAT

>ASV:5578:Order:Bacteroidales

TACGGAGGATCCGAGCGTTATCCGGATTTATTGGGTTAAAGGGAGCGTAGATGGTTTGAAGTCTGAAGTAAAAGCCC  
GGGGCTCAACCCCGTACTGCTTTGAAACTGTTAGACTTGTAGTGCAGGAGAGGTAAGTGAATTCAGGTGTAGCGGTG  
AAATGCTTAGATATCACGAAGAACCCGATTGCGAAGGCGGCTCACTAGACTGTTACTGACACTGATGCTCGAAAGTGTG  
GGTAT

>ASV:5579:Species:arfidiae/endophytica/marina/mucilaginoso/nasimurium

TACGTAGGGCGAGCGTTGTCCGGATTTATTGGGCGTAAAGAGCTTGTAGGCGGTTTGTGCGCTGCTGTGAAAGCCC  
GGGGCTTAACCCCGGTTTGCAGTGGGTACGGGCGAGCTAGAGTGCAGTAGGGGAGACTGGAATTCCTGGTGTAGCGGTG  
AAATGCGCAGATATCAGGAGGAACACCAATGGCGAAGGCGGCTCTCTGGGCTGTAACGACGCTGAGAAGCGAAAGCATG  
GGGAG

>ASV:5580:Order:Bacteroidales

TACGGAGGATCCGAGCGTTATCCGGATTTATTGGGTTAAAGGGAGCGTAGATGGCACGATAAGTCTGAAGTAAAAGGCA

ACAGCTCAACTGTTGTATGCTTTGAAACTGTGAGCTAGAGTGCAGAAGAGGTAAGCGGAATTCGTGGTGTAGCGGTGA  
AATGCTTAGATATCACGAAGAACTCCGATTGCGAAGGCAGCTCACTAGACTGTTACTGACACTGATGCTCGAAAGTGTGG  
GTATC

>ASV:5581:Family:Ruminococcaceae  
TACGTAGGTGGCAAGCGTTGTCCGGAATTACTGGGTGTAAGGGAGCGTAGGCGGAATGCAAGTCGGATGTGAAACCTA  
TGGGCTTAACCCATAGCCTGCATTGAAACTGATTTCTTGAGTGAAGTAGAGGTTGGCGGAATTCCTGGTGTAGCGGTG  
AAATGCGTAGATATCGGGAGGAACACCAGTGGCGAAGGCGGCCAACTGGGCTTTTACTGACGCTGAGGCTCGAAAGCATG  
GGGAG

>ASV:5582:Genus:Eggerthella  
TACGGAGGATCCGAGCGTTATCCGGATTTATTGGGTTAAAGGGTGCCTAGGCGGCCTCTCAAGCGGGATCTCTAATCCG  
AGGGCTCAACCCCGCGGATCCCGAACTGGGAGGCTCGAGTTCGGTAGAGGCAGGCGGAATTCCTGGTGTAGCGGTGG  
AATGCGTAGATATCGGGAGGAACACCAGTGGCGAAGGCGGCCTACTGGGCACCACTGACGCTGAGGCTCGAAAGTGTGG  
GTAGC

>ASV:5583:Genus:Piscinibacter  
TACGTAGGTTGCAAGCGTTAATCGGAATTACTGGGCGTAAAGCGTGCAGGCGGCTTTGCAAGACAGATGTGAAATCCC  
CGGGCTTAACCTGGGAACTGCATTTGTGACTGCATGGCTGGAGTGCAGGAGGGGATGGAATTCCTGGTGTAGCAGTG  
AAATGCGTAGATATCGGGAGGAACACCAGTGGCGAAGGCAATCCCCTGGGCTGCACTGACGCTCATGCACGAAAGCGTG  
GGGAG

>ASV:5584:Family:Ruminococcaceae  
TACGTAGGTGGCAAGCGTTGTCCGGATTTACTGGGTGTAAGGGCGTGTAGCCGGTACGAAAGTCAGATGTGAAATCTG  
GAGGCTCAACCTCCAACTGCATTTGAAACTGCTGATCTTGAGTATCGGAGAGGTAATCGGAATTCCTAGTGTAGCGGTG  
AAATGCGTAGATATTAGGAGGAACACCAGTGGCGAAGGCGGCTGCTGGACTGGTACTGACGCTGAGGCACGAAAGCGTG  
GGGGG

>ASV:5585:Genus:Pseudonocardia  
TACGTAGGTTGCGAGCGTTGTCCGGAATTATTGGGCGTAAAGAGCTCGTAGGCGGTGTGTCACGTGATCGTAAAACTT  
GGGGCTTAACCTGAGCTTGCAGTGCATACGGGCATCACTGGAGTTCGGCAGGGGAGACTGGAATTCCTGGTGTAGCGGT  
GAAATGCGCAGATATCAGGAGGAACACCAGTGGCGAAGGCGGCTCTGCGGCGATACTGACGCTGAGGAGCGAAAGCGT  
GGGGA

>ASV:5586:Kingdom:Bacteria  
TACGTAGGTGGCGAGCGTTATCCGGAATGATTGGGCGTAAAGGGTGCCTAGGCGGTACGGTAAGTCTGTTGTGAAAGTTT  
GCGGCTCAACCGTAAATTTGCAAGTGTACTGGCGACCTTGAAGTGAACAGAGGTAGGCGGAATTCCTGGTGTAGCGGTG  
GAATGCGTAGATATCGGGAGGAACACCAGTGGCGAAGGCGGCTACTGGGCACCACTGACGCTGAGGCTCGAAAGTGTG  
GGTAG

>ASV:5587:Genus:Eisenbergiella  
TACGGAGGATCCGAGCGTTATCCGGATTTATTGGGTTAAAGGGAGCGTAGATGGCATGACAAGCCAGATGTGAAAACCC  
AGGGCTCAACCTGGGACTGCATTTGAACTGCCAGGCTGGAGTGCAGGAGAGGTAAGCGGAATTCCTAGTGTAGCGGTG  
AAATGCGTAGATATTAGGAGGAACACCAGTGGCGAAGGCGGCTTACTGGACTGTAACGACGCTGATGCTCGAAAGTGTG  
GGTAT

>ASV:5588:Genus:Lactococcus  
TACGTAGGTCCCGAGCGTTGTCCGGATTTATTGGGCGTAAAGCGAGCGCAGGTGGTTTATTAAGTCTGGTGTAAAAGGCA  
GTGGCTCAACCATTTGATGCATTTGAAACTGGTAGACTTGAAGTGCAGGAGAGGAGAGTGAATTCATGTGTAGCGGTGA  
AATGCGTAGATATCGGAGGAACACCAGTGGCGAAGGCGGCTCACTGGCCTGTAACGACACTGAGGCTCGAAAGCGTGG  
GGAGC

>ASV:5589:Family:Erysipelotrichaceae  
TACGTAGGTGGCGAGCGTTATCCGGAATCATTGGGCGTAAAGAGGGAGCAGGCGGCGAGTGCAGGTCTGCGGTGAAAGACC  
GGAGCTAAACTTCGGTAAGCCGTGGAAACCGCACAGCTAGAGAGCATCAGAGGATCGCGGAATTCATGTGTAGCGGTGA  
AATGCGTAGATATCGAGAGGAACACTCGTGGCGAAGGCGGTTTCTGGACATTAACGACGCTGAGGCACGAAAGGCCAGG  
GGAGC

>ASV:5590:Genus:Peptostreptococcus  
TACGTAGGGGCTAGCGTTATCCGGATTTACTGGGCGTAAAGGGTGCCTAGGTGGTCTTCAAGTCCGTGGTTAAAGGCT  
ACGGCTCAACCGTAGTAAGCCGCCGAAACTGGAGAATTTGAGTGCAGGAGAGGAAAGTGAATTCCTAGTGTAGCGGTGA  
AATGCGTAGATATTGGGAGGAACACCAGTGGCGAAGGCGGCTTCTGGACTGCAACTGACACTGAGGCACGAAAGCGTGG  
GGAGC

>ASV:5591:Kingdom:Bacteria  
TACGTATGGGGCAAGCGTTATCCGGATTTACTGGGTGTAAGGGAGCGTAGGCGGTATGGCAAGTCAGAAGTGAAAGCCT  
GGGGCTCAACCCGGAATTTGTTTAAACTGTCATACTTGAAGTGCAGTAGAGGTAGGCGGAATTCGTGGTGTAGCGGTG  
AAATGCTTAGATATCACGAAGAACTCCGATTGCGAAGGCAGCTTACTGGACTGTAACGACGCTGATGCTCGAAAGTGTG  
GGTAT

>ASV:5592:Genus:Ruminococcaceae\_UCG-014  
TACATATGGGGCGAGCGTTATCCGGAATTTATTGGGTGTAAGGGTGCCTAGGCGGAATAGCAAGTCAGTATGTGAAATCT  
CTCGCTCAACCGAGAACTGCAGCTGAAACTACTATTCTTGAAGTGTGGAGGGGAAAGTGAATTCCTAGTGTAGCGGTG  
GAAATGCGTAGATATTAGGAGGAACACCAGTGGCGAAGGCGACTTTCTGGACAACAACGACGCTGAGGCACGAAAGCGT  
GGTA

>ASV:5593:Order:Clostridiales  
TACGTAGGGAGCAAGCGTTGTCCGATTTACTGGGTGTAAGGGTGCCTAGGCGGCTTTGCAAGTCAGATGTGAAATCTA  
TGGGCTCAATCCATAAACTGCATTTGAAACTGTAGAGCTAGAGTGTGGAGAGGCAAGCGGAATTCCTAGTGTAGCGGTG  
AAATGCGTAGATATTAGGAAGAACACCAGTGGCGAAGGCGGCTTCTGGACAGTAACGACGCTCAGGCTCGAAAGCGTG  
GGGAG

>ASV:5594:Genus:Erysipelotrichaceae\_UCG-003  
TACGTAGGTGGCGAGCGTTATCCGGAATTATTGGGCGTAAAGAGGGAGCAGGCGGCGACTAAGGGTCTGTGGTGAAAAGATC  
GAAACTTAACCTTCGTAAGCCATGGAACCGTAGAGCTAGAGTGTGTGAGAGGATCGTGAATTCCATGTGTAGCGGTGA  
AATGCTTAGATATACGAAGAACTCCGATTGCGAAGGCAGCTTACTGGATTGTAACCTGATGCTGATGCTCGAAAGTGTGG  
GTATC

>ASV:5595:Genus:Flavonifractor  
TACGTATGGTCAAGCGTTATCCGGATTTACTGGGTGTAAAGGGAGCGTAGGCGGGATTGCAAGTCAGATGTGAAAAGCTG  
GGGGCTCAACCTCAGCCTGCAATTTGAACTGTAGTTCTTGAGTGTGGAGAGGCAATCGGAATTCCTGTGTAGCGGTG  
AAATGCGTAGATATACGGAGGAACACCGGTGGCGAAGGCAGCTTTCTGGACGAAAACGGACGCTGAGGCGGAAAGCGTG  
GGGAG

>ASV:5596:Genus:Lachnospiraceae\_UCG-010  
AACGTAGGTCAACAAGCGTTGTCCGGAATTACTGGGTGTAAAGGGAGCGTAGGCGGCACGCCAAGCCAGATGTGAAAAGCCC  
GAGGCTTAACCTTCGCGGATTTGGAACCTGGCAGCTAGAGTACAGGAGAGGAAAGCGGAATTCCTAGTGTAGCGGTG  
GAAATGCGTAGATATTAGGAAGAACACCGGTGACGAAGGCGGCTTACTGGACTGTTACTGACGCTGAGGCTCGAAAAGTGT  
GGTA

>ASV:5597:Genus:Dielma  
TACGTAGGTGGCAAGCGTTATCCGGAATTATTGGGCGTAAAGGGTGCCTAGGCGGCAGATAAGTCTGAGGTAAAAGCCC  
GTGGCTCAACCGCGGTAAGCCTTGAAACTGTCTGGCTGGAGTGCAGGAGAGGACAATGGAATTCATGTGTAGCGGTAA  
AATGCGTAGATATATGGAGGAACACAGTGGCGAAGGCGGCTACTGGGCACCAACTGACGCTGAGGCTCGAAAAGTGTGG  
GTAGC

>ASV:5598:Genus:Parabacteroides  
AACGGAGGTGCGAGCGTTATCCGGATTTATTGGGTTAAAGGGTGCCTAGGTGGCTTATTAAGTCAGCGGTAAAAGTTT  
GTGGCTTAACCATAAAATTGCCGTTGAACTGGTACCTTGAGTATATTTGAGGTAGCGGAATGCGTGGTGTAGCGGTG  
AAATGCATAGATATACGCAGAACCTCCGATTGCGAAGGCAGCTTACTAACTATAACTGACACTGAAGCACGAAAGCGTG  
GGAT

>ASV:5599:Family:Ruminococcaceae  
TACGTAGGGAGCGAGCGTTGTCCGGATTTACTGGGTGTAAAGGGTGCCTAGGCGGGATGGCAAGTCAGATGTGAAAATACC  
GGGGCTTAACCTGAGGAACTGCAACTAAAACCTATTGTTCTTGAGTGTGGAGAGGAAAGTGAATTCCTAGTGTAGCGGTG  
AAATGCGTAGATATTAGGAGGAACACCGGTGGCGAAGGCGGCTCTGGGCCAGACTGACGCTGAGGCGGAAAGCTGG  
GGAG

>ASV:5600:Genus:Solobacterium  
TACGTAGGTGGCGAGCGTTATCCGGAATTATTGGGCGTAAAGGGTGCCTAGGCGGCTGTTAAGTAAGTGGTTAAATTGT  
TGGGCTCAACCCAATCCAGCCACTTAACTGGCAGGCTAGAGTATTGGAGAGGCAAGTGAATTCATGTGTAGCGGTAA  
AATGCGTAGATATATGGAGGAACACAGTGGCGAAGGCGGCTCGCTAGCCAAAGACTGACGCTCATGCAGAAAGCGTGG  
GGAG

>ASV:5601:Family:Lachnospiraceae  
TACGGAGGATCCAAGCGTTATCCGGATTTACTGGGTGTAAAGGGAGCGTAGACGGAGTGGAAGTCTGATGTGAAAACCC  
GGGGCTCAACCCCGGGACTGCATTGAAACTGTCAATCTGGAGTACCAGGAGGTAAGCGGAATTCCTAGTGTAGCGGTG  
AAATGCGTAGATATGGGAGGAACACAGTGGCGAAGGCGGCTACTGGGCACCAACTGACGCTGAGGCTCGAAAAGTGTG  
GGTAG

>ASV:5602:Species:niger  
AACATAGGGGGCAAGCGTTGTCCGGAATCACTGGGCGTAAAGGGCGCGCAGGCGGTCTGTTAAGTCAGATGTGAAAAGTT  
AGGGCTCAACCTGAACGTGCATCTGATACTGGCAGACTTGAGTATGGAAGAGGTAAGTGAATTCCTAGTGTAGCGGTG  
AAATGCGTAGATATTAGGAGGAACACAGTGGCGAAGGCGACTTACTGGCCATAACTGACGCTGAGGCGGAAAGCGTG  
GGGAG

>ASV:5603:Family:Ruminococcaceae  
TACGTAGGGAGCGAGCGTTGTCCGGATTTACTGGGTGTAAAGGGTGCCTAGGCGGCTAGACAAGTCAGGTGTGAAAATACC  
GCAGCTCAACTGCGGGCTGCATTGAAACTGTAGAGCTTGAGTGTGGAGAGGTAAGCGGAATTCCTAGTGTAGCGGTG  
AAATGCGTAGATATTAGGAGGAACACAGCGGCGAAGGCGGCTTACTGGACATTAAGTACGCTGAGGCGGAAAGCGTG  
GGGAG

>ASV:5604:Order:Lactobacillales  
TACGTATGGGCGAGCGTTATCCGGAATTATTGGGCGTAAAGAGTACGTAGGTGGTTTTTTAAGCGCAGGGTTTAAAGCT  
ACGGCTTAACCTGTAGTTTGCCTTGCGAACTGGGAGACTTGAGTGCAGAAGGGGAGAGTGAATTCATGTGTAGCGGTGA  
AATGCGTAGATATATGGAGGAACACCGGTGGCGAAGGCGGCTCTCTGGTCTGTAACCTGACGCTGAGGCTCGAAAAGCGTG  
GGAG

>ASV:5605:Genus:Parvimonas  
TACGGAGGATCCGAGCGTTATCCGGATTTATTGGGTTAAAGGGAGCGTAGGCGGCTTTTAAAGTCAGGTGTGAAAAGCGT  
GAGGCTTAACCTCATTAAGCACTTGAACCTGGAAGACTTGAGTGAAGGAGAGGAAAGTGAATTCCTAGTGTAGCGGTGA  
AATGCGTAGATATTAGGAGGAACACCGGTGGCGAAGGCGACTTCTGGACGAAAACCTGACGCTGAGGCGGAAAGCGTG  
GGAG

>ASV:5606:Genus:GCA-900066755  
TACGTAGGGTCAAGCGTTATCCGGAATTATTGGGCGTAAAGGGCTCGTAGACGGAGTGGAAGTCTGATGTGAAAACCC  
GGGGCTTAACCCCGGGACTGCATTGAAACTGTGTAACCTAGAGTGTGGAGAGGTAAGTGAATTCCTAGTGTAGCGGTG  
AAATGCGTAGATATTAGGAGGAACACAGTGGCGAAGGCGGCTCTGGGCGCTCAGTACGCTGAGGAGCGAAAGCGTG  
GGGAG

>ASV:5607:Genus:DNF00809  
CACGTAGGGGGCGAGCGTTATCCGGATTCATTGGGCGTAAAGCGCGCGTAGGCGGCGCTCAAGCGTGACCTCTAATCCC  
GGGGCTCAACCCCTGGCGGGTCCCGAACTGGGCGGCTCGAGTCAAGTGTAGAGGAGGCGGAATTCCTGGTGTAGCGGTGA

AATGCGCAGATATCGGGAAGAACACCGATGGCGAAGGCAGCCTGCTGGGCCTTGACTGACGCTGAGGCGCGAAAGCCGGG  
GGAGC  
>ASV:5608:Class:Bacteroidia  
TACGGAGGATTCAAGCGTTATCCGGATTTATTGGGTTTAAAGGGTGCCTAGGCGGTTTGATAAGTTAGAGGTGAAAATTT  
GCGGCTCAACCGTAAAATTGCAGTTGATACTGGCGACCTTGAGTGCACAGGGTAGGCGGAATTCGCGGTGTAGCGGTG  
GAATGCGTAGATATCGGGAGGAACACCACTGGCGAAGGCAGCCTACTGGGCACCAACTGACGCTGAGGCTCGAAAAGTGTG  
GGTAG  
>ASV:5609:Genus:Barnesiella  
TACGTAGGTGGCGAGCGTTGTCCGGAATTATTGGGCGTAAAGAGCATGTAGGCGGCTTAATAAGTCGAGCGTAAAAATCG  
GGGCTCAACCCGATGGCGCTGAAACTGGCGAGCTAGAGTACACAAGAGGCAGGTGGAATGCGTGGTGTAGCGGTGA  
AATGCATAGATATCACGCAGAACCCCGATTGCGAAGGCAGCCTGCTAGGCGTAAACAGACGCTGAGGACGAAAAGCGTGG  
GTATC  
>ASV:5610:Order:Bacteroidales  
AACGTAGGGTGAAGCGTTGTCCGGAATTACTGGGTGTAAGGGAGCGTAGGTGGATTGTTAAGTCAGTTGTGAAAATTT  
GCGGCTCAACCGTAAAATTGCAGTTGAAACTGGCAGCTTGAGTACAGTAGAGGTGGCGGAATGCGTGGTGTAGCGGTG  
AAATGCATAGATATCACGCAGAACTCCGATTGCGAAGGCAGCTTACTAAACCATAACTGACACTGAAGCACGAAAAGCGTG  
GGAT  
>ASV:5611:Family:Family\_XIII  
TACGTAGGGGCGAGCGTTATCCGGAATTATTGGGCGTAAAGAGTACGTAGGCGGTTTTTTAAGCGAGGGGTATAAGGCA  
GCGGCTTAACCTGCTGTTGGCCCTCGAACTGGAGACTTGAGTGTCCGAGAGGAAAGCGGAATTCCTAGTGTAGCGGTGA  
AATGCGTAGATATTAGGAGGAACACCACTGGCGAAGGCAGCCTGCTGGGCTTTAACTGACGCTGAGGACGAAAAGCATGG  
GGAGC  
>ASV:5612:Family:Ruminococcaceae  
TACGTAGGGAGCGAGCGTTGTCCGGAATTACTGGGTGTAAGGGAGCGTAGGCGGGATGCAAGTTGAATGTTAAACTA  
TCGGCTCAACCTGATAGTCGCGTTCAAACCTGCAACTCTTGAGTGAAGTAGAGGTAGGCGGAATTCCTAGTGTAGCGGTGA  
AATGCTTAGATATCACGAAGAACTCCGATTGCGAAGGCAGCTCACTGGACTGCAACTGACACTGATGCTCGAAAAGTGTGG  
GTATC  
>ASV:5613:Genus:Oscillibacter  
TACGTAGGTGGCAAGCGTTGTCCGATTTACTGGGTGTAAGGGCGTGCAGCCGGCTGGTAAGTCAGATGTGAAATCCG  
TGGGCTTAACCCACGAACTGCATTTGAAACTGCTGGTCTTGAGTACCAGGAGGTTATCGGAATTCCTGTGTAGCGGTG  
AAATGCGTAGATATCACGCAGAACTCCGATTGCGAAGGCAGCTTACTAAACCATAACTGACACTGAAGCACGAAAAGTGTG  
GGTAG  
>ASV:5614:Family:Lachnospiraceae  
TACGTAGGGGCGAGCGTTATCCGATTTACTGGGTGTAAGGGAGCGTAGACGGCATTGCAAGTCTGAAGTGAAGGCC  
GCGGCTCAACCGCGAACTGCTTTGAAACTGTAAGCTGGAGTACCAGGAGGTAAGCGGAATTCCTAGTGTAGCGGTG  
AAATGCGTAGATATTACGCAGAACCCCGATTGCGAAGGCAGCCTGCTAGGCGTGCACAGACGCTGAGGACGAAAAGCGTG  
GGTAT  
>ASV:5615:Class:Bacteroidia  
TACGTAGGGAGCAAGCGTTGTCCGATTTACTGGGTGTAAGGGTGCCTAGGCGGCTTTGCAAGTCAGATGTGAAATCTA  
TGGGCTCAACCCATAAACTGCTTTCAAACCTGTTTTCTTGAGTAGTGCAGAGGTGGCGGAATTCGTGGTGTAGCGGTG  
AAATGCTTAGATATCACGAAGAACTCCGATTGCGAAGGCAGCTCACTGGACTGCAACTGACACTGATGCTCGAAAAGTGTG  
GGTAT  
>ASV:5616:Genus:Clostridium\_sensu\_stricto\_2  
TACGGAGGATTCAAGCGTTATCCGGATCTATTGGGTTTAAAGAGAGCGTAGGCGGATTTTAAAGTGGGATGTGAAATACC  
CGGGCTCAACCTGGGTGCTGCATTCAAACCTGGAAGTCTAGAGTACAGGAGGGGAAAGCGGAATTCCTAATGTAGCGGTG  
AAATGCGTAGAGATTGGGAGGAACACCACTGGCGAAGGCAGCTAACTGGACTGTAACGACGCTGAGGCGCGAAAAGTGTG  
GGGAG  
>ASV:5617:Family:Ruminococcaceae  
TACGTAGGTGGCAAGCGTTGTCCGGAATTACTGGGTGTAAGGGAGCGTAGGCGGGAGTGAAGTTGAATGTGAAAACGA  
TGGGCTCAACCCATCGTTGCGTTCAAACCTGCATTTCTTGAGTGAAGTAGAGGTAAGCGGAATTCCTAGTGTAGCGGTGA  
AATGCGTAGATATTAGGAAGAACACCACTGGCGAAGGCAGCCTTCTGGACTGCAACTGACGCTGAGGACGAAAAGCGTGG  
GGAGC  
>ASV:5618:Family:Lachnospiraceae  
TACGGAGGATGCGAGCGTTATCCGATTTATTGGGTTTAAAGGGAGCGTAGACGGTTGTGTAAGTCTGATGTGAAAAGCC  
GGGGCTCAACCCGGGACTGCATTGAAACTATGTAAGTAGAGTGTCCGAGAGGGTGGCGGAATTCAGGTGTAGGAGTG  
AAATCCGTAGATATCTGGAGGAACACCGTGGCGAAGGCAGCCACCTGGACGGTAACGACGCTGAGGTGCGAAAAGCGTG  
GGTAG  
>ASV:5619:Family:Lachnospiraceae  
AACGTAGGGGCGAAGCGTTATCCGATTTACTGGGTGTAAGGGAGCGTAGACGGATGGACAAGTCTGATGTGAAAAGGCT  
GGGGCTCAACCCGGGACTGCATTGAAACTGCCGCTTGAGTGCAGGAGGGTGGCGGAATTCAGGTGTAGGAGTG  
AAATCCGTAGATATCTGGAGGAACACCGTGGCGAAGGCAGCCACCTGGACGGTAACGACGCTGAGGTGCGAAAAGCGTG  
GGTAG  
>ASV:5620:Order:Bacteroidales  
TACGTAGGGGCGAAGCGTTATCCGATTTACTGGGTGTAAGGGAGCGTAGGCGGATGCTTAAAGTCAGTTGTGAAAATTT  
GCGGCTCAACCGTAAAATTGCAGTTGATACTGGGTGCTTGAGTACAGTAGAGGCAGGCGGAATTCGTGGTGTAGCGGTG  
AAATGCTTGATATCACGAAGAACCAATGGCGAAGGCAGCTCTCTGGGCCCTTACTGACGCTGAGGAGCGAAAAGCGTG  
GGGAG  
>ASV:5621:Family:Lachnospiraceae

TACGTATGGTGCAAGCGTTATCCGGATTTACTGGGTGTAAAGGGAGCGCAGGCGGTACGGCAAGTCTGATGTGAAAGCCC  
GGGGCTCAACCCCGGACTGCTTTTAAAAGTGTGGAGCTGGAGTGCAGGAGAGGCAAGTGAATTCTAGTGTAGCGGTG  
AAATGCGTAGATATTAGGAGGAACACCAGTGGCGAAGGCGGCTACTGGGCTTAACTGACGCTGAGGCACGAAAGTGTG  
GGTAG

>ASV:5622:Order:Clostridiales

TACGTAGGGAGCGAGCGTTGTCCGGATTTACTGGGTGTAAAGGGTGCCTAGGCGGATTTGCAAGTCAGAAGTAAATCCA  
TGGGCTTAACCCATGAACTGCTTTTAAAAGTGTAGTCTTAGTGAAGTAGAGGTAGGCGGAATTCCTGGTGTAGCGGTG  
AAATGCGTAGATATCACGCAGAACTCCGATTGCGAAGGCAGCTTACTAAACCATAACTGACACTGAAGCACGAAAGCGTG  
GGGAT

>ASV:5623:Genus:Alistipes

TACGGAGGATCAAGCGTTATCCGGATTTATTGGGTTTAAAGGGTGCCTAGGCGGTTTGATAAGTTAGAGGTGAAATTC  
GGGGCTCAACCTGAACGTGCTCTAATACTGTTGAGCTAGAGAGTAGTTGCGGTAGGCGGAATGTATGGTGTAGCGGTG  
AAATGCGTAGATATACGGAGGAACACCAGTGGCGAAGGCGGATTGCTGGACAGTAACTGACGCTGAGGCGCGAAAGTGTG  
GGTAT

>ASV:5624:Genus:Bacteroides

TACGGAGGATGCGAGCGTTATCCGGATTTATTGGGTTTAAAGGGAGCGTAGACGGGTTTTAAGTCAGCTGTGAAAGTTT  
GGGGCTCAACCTTAAATGCACTGTTGAACTGGAGACCTTAGTACGGTTGAGGCAGGCGCAATTCGTGGTGTAGCGGTG  
AAATGCTTAGATATCACGAAGACCCCGATTGCGAAGGCAGCTGCTAAGCCGCCACTGACGTTGAGGCTCGAAAGTGCG  
GGTAT

>ASV:5625:Order:IMCC26256

TACGTAGGGGGCGAGCGTTGTCCGGAATTATTGGGCGTAAAGAGCTCGTAGGCGGTTGGGCAAGTCACGTGTGAAATCTC  
CAGCTCAACGTGGAGGCGTACGTGAGACTGCCCTGACTCGAGTCCGGTAGGGGAGCGTGAATTCCTGGTGTAGCGGTG  
GAAATGCGCAGAGATCGGGAGGAACCCCGTAGCGAAGGCGGCGCTCTGGCCGGTACTGACGCTGAGGAGTGAAGCGTG  
GGGA

>ASV:5626:Phylum:Bacteroidetes

TACGTAGGGGGCAAGCGTTGTCCGGAATTACTGGGTGTAAAGGGAGCGCAGGCGGACCAGGCAAGTTGGAAGTAAATCTA  
TGGGCTCAACCCATAAACTGCTTTCAAAGTGTCTTCTTAGTGTGACAGAGGTAGGCGGAATGCGTGGTGTAGCGGTG  
AAATGCGTAGATATCACGCAGAACTCCGATTGCGAAGGCAGCTTACTAAACCATAACTGACACTGAAGCACGAAAGCGTG  
GGGAT

>ASV:5627:Family:Lachnospiraceae

AACGTAGGTCACAAGCGTTGTCCGGATTTACTGGGTGTAAAGGGCGTGTAGCCGGGAAGGCAAGTCAGATGTGAAATCCA  
CGGGCTCAACCTCGTGACTGCATTTGAACTGCTGAGCTAGAGTGTGCGAGAGGCAAGTGAATTCCTAGTGTAGCGGTG  
AAATGCGTAGATATTAGGAGGAACACCAGTGGCGAAGGCGGCTTCTGACAGATGACTGACGTTGAGGCTCGAAAGCGTG  
GGGAG

>ASV:5628:Phylum:Firmicutes

TACGTAGGTGGCGAGCGTTGTCCGGATTTACTGGGTGTAAAGGGTGCCTAGGTGGCAGTGAAGTCAGATGTGAAAGGCC  
GGGGCTCAACCCCGGACTGCAATTTGAACTGCTCCGCTAGAGTACAGGAGAGGCAAGTGAATTCCTAGTGTAGCGGTG  
AAATGCGTAGATATTGGGAGGAACACCAGTGGCGAAGGCGGCTTCTGACTGTGCTGACGCTGAGATGCGAAAGCCAG  
GGTAG

>ASV:5629:Family:Peptostreptococcaceae

TACGTATGGTGCAAGCGTTATCCGGATTTACTGGGTGTAAAGGGAGCGCAGGCGGTGCGGCAAGTCTGATGTGAAAGCCC  
GGGGCTCAACCCGAGTAAAGCCTTTGAACTGGGAACTTGTAGTGCAGGAGAGGCAAGTGAATTCCTAGTGTAGCGGTG  
AATGCGTAGATATTAGGAGGAACACCAGTAGCGAAGGCGGCTCTCTGACTGTAAGTACGCTGAGGCGCAAGGCGGTG  
GGAGC

>ASV:5630:Family:Ruminococcaceae

TACGTAGGTGGCAAGCGTTATCCGGAATTACTGGGTGTAAAGGGAGCGTAGGCGGATCTTAAGTCAGGTGTGAAAACCTA  
TGGGCTCAACCCATAGACTGCATTTGAACTGAGTTCTTAGTGAAGTAGAGGCGAGGCGGAATTCCTAGTGTAGCGGTG  
AAATGCGTAGATATAACTTAGAACTCCGATAGCGAAGGCAGCTTACCAGACTGTAAGTACGCTGATGACGAGAGCGTG  
GGTAG

>ASV:5631:Phylum:Firmicutes

TACGTAGGGGGCGAGCGTTATCCGGATTTATTGGGCGTAAAGCGTGCCTAGGCGGTTTGTAAAGTCTAAGTCAAAGCCC  
GAGGCTCAACCTCGGTTCTGCTTAGAAAAGTACAGACTTGTAGTGCAGGAGAGGAAAGCGGAATTCCTAGTGTAGCGGTG  
AATGCGTAGATATTAGGAGGAACACCAGTGGCGAAGGCGGATTGCTGGACAGCAACTGACGCTGAGGCGCGAAAGTGTGG  
GTATC

>ASV:5632:Genus:DTU089

TACGTAGGGAGCGAGCGTTGTCCGGATTTACTGGGTGTAAAGGGTGCCTAGGCGGATCTGCAAGTCAGTGTGAAATCCC  
AGGGCTTAAACCTGGAACTGCAATTTGAACTGATTTCTTAGTGTGCGAGAGGTTGACGGAATTCCTAGTGTAGCGGTG  
AAATGCGTAGATATCACGAAGAACTCCGATTGCGAAGGCAGCTACTAGACTGTACTGACACTGATGCTCGAAAGTGTG  
GGTAT

>ASV:5633:Family:Lachnospiraceae

TACGTATGGTGCAAGCGTTATCCGGATTTACTGGGTGTAAAGGGAGCGTAGACGGATTAGCAAGTCTGATGTGAAAGGCA  
GGGGCTCAACCCCTGGACTGCAATTTGAACTGCTGAGCTAGAGTGTGCGAGAGGCAAGTGAATTCCTAGTGTAGCGGTG  
AAATGCGTAGATATTAGGAGGAACACCAGTGGCGAAGGCGATTGCTGGGCTGTAAGTACGCTGAGGTACGAAAGCGTG  
GGTAG

>ASV:5634:Order:Clostridiales

TACGTATGGTACAAGCGTTATCCGGATTTACTGGGTGTAAAGGGAGCGCAGGCGGTGCGGCAAGTCTGATGTGAAAGCCC  
GAGGCTTAAACCTCGGTTCTGCTTAGATACTGGTTGACTAGAGTACTGTAGAGGCAAATGGAATTCCTAGTGTAGCGGTG  
AATGCGTAGATATTAGGAGGAACACCAGTGGCGAAGGCGATTGCTGGGCTGTAAGTACGCTGAGGCTCGAAAGCGTG

GGAGC

>ASV:5635:Genus:Eggerthella

TACGTAGGGAGCGAGCGTTACCCGGATTCTGGGCGTAAAGAGCGCGTAGGCGGCCTCTCAAGCGGGATCTCTAATCCG  
AGGGCTCAACCCCGGCGGATCCCGAATGGGAGGCTCGAGTTCGGTAGAGGCAGGCGGAATTCCTGGTGTAGCGGTGG  
AATGCGCAGATATCGGAAGAACACCGATGGCGAAGGCAGCTGCTGGGCCGCAACTGACGCTGAGGCGCGAAAGCTAGG  
GGAGC

>ASV:5636:Genus:Ruminiclostridium\_9

TACGTAGGGAGTAAGCGTTATCCGGATTACTGGGTGTAAGGGCGTGTAGGCGGGACTGCAAGTCAGATGTGAAAACCTA  
TGGGCTCAACTCATAGCCTGCATTTGAAACTGTAGTTCCTGAGTGTGGAGAGGCAAATGAACTCCTAGTGTAGCGGTG  
AAATGCGTAGATATTAGGAAGAACCAGTGGCGAAGGCGATTGCTGGACAGTAACGACGCTGAGGCGCGAAAGTGTG  
GGGAG

>ASV:5637:Genus:Gemella

TACGTAGGTGGCAAGCGTTGTCCGGAATTATTGGGCGTAAAGCGCGCTAGGTGGTTTAAATAAGTCTGATGTGAAAGCC  
ACGGCTCAACCGTGGAGGGTGTGGAACTGTTAAACTTGTAGTGCAGGAGAGAAAAGTGGAAATTCCTAGTGTAGCGGTG  
AAATGCGTAGAGATTAGGAGGAACACCAGTGGCGAAGGCGCCTTTGGCTGTAACGACACTGAGGCGCGAAAGCGTG  
GGGAG

>ASV:5638:Genus:Subdoligranulum

AACGTAGGGTGGCAAGCGTTGTCCGGAATTACTGGGTGTAAGGGAGCGCAGGCGGACCGGCAAGTTGGAAGTAAATCTA  
TGGGCTCAACCCATAAATTGCTTTCAAACCTGCTGGCCTTGTAGTGCAGAGGTAGGTGGAATTCCTGGTGTAGCGGTG  
GAATGCGTAGATATCACGAAGAACCAGTGGCGAAGGCGCCTCTTGGCTGTAACGACACTGAGGCTCGAAAGTGTG  
GGTAT

>ASV:5639:Family:Burkholderiaceae

TACGGAGGATTCAAGCGTTATCCGGATTTATTGGGTGTAAGGGTGCAGGCGGTTGAGTAAGACAGATGTGAAATCCC  
CGAGCTTAACCTGGGAATGGCATATGTGACTGCTCGACTAGAGTGTGTGAGGGAGGTGGAATTCACGCTGTAGCGGTG  
AAATGCGTAAATATTAGGAGGAACACCAGTGGCGAAGGCGGATTGCTGGACACAACGACGCTGAGGCGCGAAAGCGTG  
GGGAG

>ASV:5640:Phylum:Firmicutes

TACGTAGGTGACAAGCGTTGTCCGGATTTACTGGGTGTAAGGGTGCCTAGGTGGCAGTGCAGTGCAGATGTGAAATACC  
GGGGCTTAACCCGGGCTGCATTTGAAACTGTGTTCTTGTAGTGAAGTAGAGGCAGGCGGAATTCACGCTGTAGCAGTG  
AAATGCGTAGATATGTGGAAGAACCAGTGGCGAAGGCGCCTCTGGGACATAACGACGCTCAGGCACGAAAGCGTG  
GGGAG

>ASV:5641:Kingdom:Bacteria

TACGTATGGTGGCAAGCGTTATCCGGATTTATTGGGCGTAAAGGGCGCGTAGGCGGCCCGGAAGGCGGGGGTAAAGCGC  
GGGGCCCAACCCGCAAGCGCCCCGGGACCCCCGGGCTCGGGTCCCGCAGGGGGTGGCGGAATTCCTGGTGTAGCGGTG  
GAATGCGCAGATATCGGGAGGAACACCAGTGGCGAAGGCGGATTGCTGGACACAACGACGCTGAGGCGCGAAAGCGTG  
GGGAG

>ASV:5642:Family:Clostridiales\_vadinBB60\_group

TACGTAGGTGGCAAGCGTTGTCCGGAATGACTGGGCGTAAAGGGTGCCTAGGTGGCTATTCAAGTTAGTAGTAAATCCC  
GGGGCTCAACTCCGGTCTACTACTAAGACTGTTTAGCTTGTAGTGCAGGAGGGGCAAGTGGAAATTCCTAGTGTAGCGGTG  
GAATGCGTAGATATTAGGAGGAACACCAGTGGCGAAGGCGACTTGTGGACTGTAACGACACTGAGGTACGAAAGCGTG  
GGGAG

>ASV:5643:Genus:Ruminococcaceae\_UCG-010

TACGTAGGTGGCAGCGTTATCCGGAATTACTGGGTGTAAGGGTGTGTAGGGGGACGACAAGTCAGATGTGAAAATTTG  
CAGGCTCAACCTGGAAAGTGCATTTGAAACTGCCGTTCTTGTAGAGTGGAGAGGTAATGGAATTCCTGGTGTAGCGGTG  
AAATGCTTAGATATCACGAAGAACCAGTGGCGAAGGCGACTACTGGACTGCAACTGACACTGATGCTCGAAAGTGTG  
GGTAT

>ASV:5644:Genus:DTU089

TACGTAGGGAGCGAGCGTTGTCCGGATTTACTGGGTGTAAGGGTGCCTAGGCGGATCTGCAAGTCAGTAGTAAATCCC  
AGGGCTTAACCTGGAACTGCTATTGAAACTGTGGTCTTGTAGTGTAGGTCAGGCGGAAATTCGTGGTGCAGCGGTG  
AAATGCTTAGATATCACGAAGAACCAGTGGCGAAGGCGACTACTGGACTGCAACTGACGCTGATGCTCGAAAGTGTG  
GGTAT

>ASV:5645:Family:Family\_XIII

TACGTAGGGGGCAGCGTTATCCGGAATTATTGGGCGTAAAGAGTGCCTAGGTGGCACCTTAAACCGAGGGTTAAGGCA  
ATGGCTCAACCTATTGTCGCTTGGCAACTGGGGTGTGAGTGCAGGAGGGGAAAGTGGAAATTCCTAGTGTAGCGGTGA  
AATGCGTAGATATTAGGAGGAACACCAGTGGCGAAGGCGGCTACTGGGCTGTAACGACGCTGAGGCTCGAAAGCGTGG  
GTAGC

>ASV:5646:Family:Ruminococcaceae

TACGTAGGTGGCAAGCGTTGTCCGGAATTACTGGGTGTAAGGGAGCGTAGGCGGGAATGCAAGTCAAGTGTAAATCTA  
TCGGCTCAACTGATAGCTGCGCTTGAACCTGCGCTTCTTGTAGTGAAGTAGAGGCAGGCGGAATTCCTAGTGTAGCGGCA  
AATGCGTAGATATTAGGAGGAACACCAGTGGCGAAGGCGGCTGCTGGGCTTAACTGACGCTGAGGCGCGAAAGCGTGG  
GTAGC

>ASV:5647:Kingdom:Bacteria

TACGTAGGGAGCGAGCGTTGTCCGGAATTACTGGGTGTAAGGGAGCGTAGGCGGGACAGCAAGTTGAATGTGAGATCTA  
TGGGCTCAACCCATAAAGTGCCTTCAAACCTGTTGTTCTTGTAGTGAAGTAGAGGTAGGCGGAATTCCTAGTGTAGCGGTG  
GAATGCGCAGATATCGGAAGAACCAGTGGCGAAGGCGCCTGCTGGGCCGCACTGACGCTGAGGCGCGAAAGCTGG  
GGGAG

>ASV:5648:Order:Rhodospirillales

TACGAAGGGGGCAAGCGTTGTCCGGAATTACTGGGCGTAAAGGGTGTGTAGGCGGTTATGTAAGATAGCGGTGAAATGCC



GGGGCTCAACCTCGGAATTGCCTTTATGACTATATACTAGATAATGGAGAGGATATCGGAATACCCAGTGTAGAGGTG  
AAATTCGTAGATATTGGGTAGAACACCAGCGGCGAAGGCGGGTATCTGGCCATTTATTGACGCTGAGGCACGAAAGCATG  
GGGAT

>ASV:5649:Family:Ruminococcaceae  
TACGTAGGTGGCAAGCGTTGTCCGGATTTACTGGGTGTAAGGGCGTGCAGCCGGGAATGCAAGTCGGATGTGAAATCCA  
TGGGCTCAACCCATGAACTGCTTTCAAACCTGTTTTCTTGGTGTAGTGCAGAGGTAGCGGGAATCCCGGTGTAGCGGTG  
AAATGCGTAGATATTGGGAGGAACACCAGTGGCGAAGGCACCTTTCTGGACTGTGTCTGACGCTGAGATGCGAAAGCCAG  
GGTAG

>ASV:5650:Family:Acidaminococcaceae  
TACGTATGGTGAAGCGTTGTCCGGAATTATTGGGCGTAAAGAGCATGTAGGCGGCTTAATAAGTCGAGCGTGAATATGC  
GGGGCTCAACCCGATGCGCTGGAACTGTAGGCTTGTAGTGCAGGAGAGGAAAGGGGAATCCCGGTGTAGCGGTGA  
AATGCTTAGATATCACGAAGAACTCCGATTGCGAAGGCAGCTCACTGGACTGCAACTGACACTGATGCTCGAAAGTGTGG  
GTATC

>ASV:5651:Family:Lachnospiraceae  
TACGTAGGGGGCAAGCGTTATCCGGATTTACTGGGTGTAAGGGGAGCGTAGACGGTTAAGCAAGTCTGAAGTAAAGCCC  
GGGGCTCAACCCGGAAGTGCATTGGAACCTGCTGGGCTTGTAGTGCAGGAGAGGTAAGCGGAATTCCTAGTGTAGCGGTG  
AAATGCGTAGATATTAGGAGGAACACCAGTGGCGAAGGCGGCTTACTGGACGATGACTGACGTTGGGGCTCGAAAGCGTG  
GGGAG

>ASV:5652:Family:Clostridiales\_vadinBB60\_group  
TACGTAGGGAGCGAGCGTTGTCCGGAATGACTGGGCGTAAAGGGAGTGTAGGCGGCTTGGCAAGTTAGATGTGAAAGCCC  
GCAGCTCAACTGCGGAAGTGCATCTAAAACCTGTCAGGCTTGTAGTGCAGGAGAGGTAAGTGGAAATTCCTAGTGTAGCGGTG  
GAATGCGTAGATATTAGGAGGAACATCAGTGGCGAAGGCGGCTTACTGGGCTTAACTGACGCTGAGGCTCGAAAGCGTG  
GGGAG

>ASV:5653:Family:Veillonellaceae  
TACGTAGGTGGCAAGCGTTGTCCGGAATTATTGGGCGTAAAGCGCGGCAGGCGGCTTCCCAAGTCCCTCTTAAAAGTGC  
GGGGCTTAAACCCGATGGAAGGAACTGTCAATCTAGAGTGCAGGAGAGGTAAGTGGAAATTCCTAGTGTAGCGGTGA  
AATGCGTAGATATTGGGAGGAACACCAGTGGCGAAGGCGCTTTCTGGACTGTGTCTGACGCTGAGATGCGAAAGCCAGG  
GTAGC

>ASV:5654:Order:Bacteroidales  
TACGGAAGATGCGAGCGTTATCCGGATTTATTGGGTTTAAAGGGAGCGTAGATGGATGTTTAAAGTCAGTTGTGAAAGTTT  
GCGGCTCAACCGTAAATTTGCAAGTGTACTGGATATCTTGTAGTGAAGTAGAGGTAAGCGGAATTCCTAGTGTAGTGGTA  
AAATGCGCAGATATTAGGAGGAACACCAGTGGCGAAGGCGGTTTGTGGGCCATTACTGACGTTGAGGTACGAAAGCGTG  
GGTAG

>ASV:5655:Family:Lachnospiraceae  
TACGTATGGTGAAGCGTTATCCGGATTTACTGGGTGTAAGGGTGCCTAGGTGGTATGGCAAGTCAGAAGTGAAGGGCT  
GGGGCTCAACCCGGGACTGCTTTTGAACCTGCAAACTAGAGTACAGGAGAGGAAAGCGGAATTCCTAGTGTAGCGGTG  
AAATGCGTAGATATTAGGAGGAACACCAGTGGCGAAGGCGGCTTTCTGGACTGAAACTGACACTGAGGCACGAAAGCGTG  
GGGAG

>ASV:5656:Genus:Bacteroides  
TACGGAGGATCCGAGCGTTATCCGGATTTATTGGGTTTAAAGGGAGCGTAGGCGGATTGTTAAGTCAGTTGTGAAAGTTT  
GCGGCTCAACCGTAAATTTGCAAGTGTACTGGCAGTCTTGTAGTGCAGGAGAGGTTAGTGGAAATTCCTAGTGTAGCGGTG  
AAATGCGTAGATATTGGGAGGAACACCAGTGGCGAAGGCGACTAACTGGACTGTAACGACATTGAGGCTCGAAAGTGTG  
GGTAT

>ASV:5657:Family:Ruminococcaceae  
TACGTAGGGAGCGAGCGTTGTCCGGATTTACTGGGTGTAAGGGCGCGTAGGCGGAGAGACAAGTCAGATGTGAAATCTA  
TGGGCTTAAACCCATAAACTGCAATTTGAAACTATCTCCCTTGTAGTGTGGAGAGGCAAGCGGAATTCCTAGTGTAGCGGTG  
AAATGCGTAGATATCACGAAGAACTCCGATTGCGAAGGCAGCTCACTGGAGCGCAACTGACGCTGAAGCTCGAAAGTGGC  
GGTAT

>ASV:5658:Genus:Parabacteroides  
TACGGAGGATGCGAGCGTTATCCGGATTTATTGGGTTTAAAGGGTGCCTAGGTGGTATTTAAGTCAGCGGTGAAAGTTT  
GTGGCTCAACCATAAATTTGCCGTTGAAACTGGGTTACTTGTAGTGTGTTTGGAGTAGCGGAATGCGTGGTGTAGCGGTG  
AAATGCTTAGATATCACGAAGAACCAATGGCGAAGGCAGGTCTCTGGGCCCTCACTGACGCTGAGGAGCGAAAGCGTG  
GGGAG

>ASV:5659:Family:Ruminococcaceae  
TACGTAGGTGGCAAGCGTTGTCCGGAATTACTGGGTGTAAGGGGAGTGTAGGCGGGATATCAAGTCAGAAGTGAATTA  
CGGGCTCAACCCGGGAAGTGCATTTGAAACTGTTGGGCTGGAGTGTGGAGAGGCAACCGGAATTCCTAGTGTAGCGGTG  
AAATGCGTAGATATTAGGAGGAACACCAGTGGCGAAGGCGGTTCAACTGGACGATAACTGACGCTGAGGCAGGCGAAAGCGTG  
GGGAG

>ASV:5660:Genus:Ruminococcaceae\_UCG-002  
TACGTATGGAGCAAGCGTTATCCGGATTTACTGGGTGTAAGGGCGTGTAGCCGGGAGGGCAAGTCAGATGTGAAATCCA  
CGGGCTCAACTCGTGAAGTGCATTTGAAACTACTCTTCTTGTAGTATCGGAGAGGCAATCGGAATTCCTAGTGTAGCGGTG  
AATGCGTAGATATTAGGAGGAACACCAGTGGCGAAGGCAGCTTACTAACCTGTAACCTGACATTGATGCTCGAAAGTGTGG  
GTATC

>ASV:5661:Genus:Oscillibacter  
AACGTAGGGTGAAGCGTTGTCCGGAATTACTGGGTGTAAGGGCGTGCAGCCGGGCGGCAAGTCAGATGTGAAATCTG  
GAGGCTTAACTTCAAACCTGCATTTGAAACTGTAGGCTTGTAGTACCAGGAGAGGTTATCGGAATTCCTAGTGTAGCGGTG  
AAATGCGTAGATATTAGGAGGAACACCAGTGGCGAAGGCGGCTTACTGGACGATTACTGACGTTGAGGCGCGAAAGTGTG  
GGGAG

>ASV:5662:Genus:Catabacter  
TACGTAGGGAGCAAGCGTTGTCCGGAATTACTGGGCGTAAAGGGTGCAGTGGCCATGTAAGTTAGGTGTGAAAGACC  
GGGGCTTAACCCCGGGCGGCACCTTAAACTGTGTGGCTTGTAGTACAGGAGAGGGAAAGTGAATTCTAGTGTAGCGGTG  
AAATGCGTAGATATTAGGAGGAACACCAGTGGCGAAGGCGACTTTCTGGACGATAACTGACGCTGAGGCTCGAAAGCGTG  
GGGAG

>ASV:5663:Family:Ruminococcaceae  
TACGTAGGTGGCAAGCGTTGTCCGGAATTACTGGGTGTAAGGGGAGCGCAGGCGGGAAGACAAGTTGGAAGTGAAAACCA  
GGGGCTCAACCTCTGGCTGCATTTGAAACTGTAGTCTTGTAGTACTGGAGAGGTTGACGGAATTCCTAGTGTAGCGGTG  
AAATGCGTAGATATTAGGAGGAACACCAGTGGCGAAGGCGGTCAACTGGACAGCAACTGACGCTGAGGCGCAAAGCGTG  
GGGAG

>ASV:5664:Genus:Flavonifractor  
TACGGAGGATCCGAGCGTTATCCGGATTTATGGGTGTAAGGGGCGTGTAGGCGGGATTGCAAGTCAGATGTGAAAACCTG  
GGGGCTCAACCTCCAGCTGCATTTGAAACTGTAGTCTTGTAGTGTGCGAGAGGCAATCGGAATTCCTAGTGTAGCGGTG  
GAATGCGTAGATATCGGGAGGAACACCAGTGGCGAAGGCGACTACTGGGCACCAACTGACGCTGAGGCTCGAAAGCATG  
GGTAG

>ASV:5665:Family:Lachnospiraceae  
TACGTAGGTGGCAAGCGTTGTCCGGAATTACTGGGTGTAAGGGGCGTGCAGCCGGTCTGCAAGTCAGAAGTGAAAATCC  
GGGGCTCAACCCCGGAAGTGCATTTGAAACTGTAGTCTTGTAGTGTGCGAGAGGGTGTAGTGAATTCCTAGTGTAGCGGTG  
AAATGCGTAGATATTAGGAGGAACACCAGTGGCGAAGGCGGCTACTGGGCACCAACTGACGCTGAGGCGCAAAGCGTG  
GGGAG

>ASV:5666:Family:Ruminococcaceae  
TACGTATGGTGCAAGCGTTATCCGGATTTACTGGGTGTAAGGGGAGCGCAGGCGGAGAAGCAAGTCAGTGGTGTGAAAACGA  
TGGGCTTAACCTCATCGACTGCATTTGAAACTGTAGTCTTGTAGTGTGCGAGGGGCAATCGGAATTCCTAGTGTAGCGGTG  
AAATGCGTAGATATTAGGAGGAACACCAGTGGCGAAGGCGGATTGCTGGACGATAACTGACGCTGAGGCGCAAAGTGTG  
GGGAG

>ASV:5667:Genus:Clostridium\_sensu\_stricto\_4  
TACGTAGGGGGCTAGCGTTATCCGGATTTACTGGGCGTAAAGGGGAGCGTAGGCGGACTTTTAAAGTGAGATGTGAAAATCC  
CGGGCTCAACCTTGGGCTGCATTTGAAACTGTAGTCTTGTAGTGTGCGAGAGGGAATCGGAATTCCTAGTGTAGCGGTG  
AAATGCTTAGATATCACGAAGAATCCGATTGCGAAGGCGACTACTAGACTGTTACTGACACTGATGCTCGAAAGTGTG  
GGTAT

>ASV:5668:Family:Lachnospiraceae  
TACGTATGGTGCAAGCGTTATCCGGATTTACTGGGTGTAAGGGGAGTGTAGACGGCAAGCAAGTCTGATGTGAAAACCC  
AGGGCTTAACCCCGGACTGCTTTGAAACTGTATGGCTAGAGTGTGCGAGAGGCAAGCGGAATTCCTAGTGTAGCGGTG  
AAATGCGTAGAGATATGAGGAACACCAGTGGCGAAGGCGGCTTCTGGTCTGTAAGTACTGACACTGAGGCGCAAAGTGTG  
GGTAG

>ASV:5669:Genus:Lactococcus  
TACGTAGGTCCCGAGCGTTGTCCGGATTTATTGGGCGTAAAGCGAGCGCAGGTGGTTTTATTAAGTCTGGTGTAAAAGGCA  
GTGGCTCAACCATTTGTATGCATTTGAAACTGGTAGACTTGTAGTGTGCGAGAGGAGAGAGTGAATTCATGTGTAGCGGTG  
AATGCGTAGATATATGAGGAACACCAGTGGCGAAAACGGCTCTCTGGCTGTAAGTACTGACACTGAGGCTCGAAAGCGTG  
GGAGC

>ASV:5670:Genus:Anaerofilum  
TACGGAGGATCCGAGCGTTATCCGGATTTATTGGGTTTAAAGGGAGCGTAGGTGGATTGTTAAGTCAAGTGTGAAAATCTA  
TGGGCTTAACCCATAAACTGCTTTCAAACCTGTTTTCTTGTAGTGTGCGAGAGGTAGGCGGAATTCCTAGTGTAGCGGTG  
GAATGCGTAGATATCGGGAGGAACACCAGAGGCGAAGGCGGCTACTGGGCACCAACTGACGCTGAGGCTCGAAAGTGTG  
GGTAG

>ASV:5671:Order:Clostridiales  
AACGTAGGTCAACAGCGTTGTCCGGAATTACTGGGTGTAAGGGGAGTGTAGGTGGCCATGCAAGTCAGAAGTGAAAATCC  
GGGGCTCAACCCCGGAAGTGCATTTGAAACTGTAAAGGCTAGAGTGTGCGAGAGGGTGTAGTGAATTCCTAGTGTAGCGGTG  
GAATGCGTAGATATCGGGAAGAACACCAGTGGCGAAGGCGGCTCTGGGACATGACTGACGCTCATGCACGAAAGCGTG  
GGGAG

>ASV:5672:Genus:Rikenellaceae\_RC9\_gut\_group  
TACGGGGGATGCAAGCGTTATCCGGAATTTATTGGGTTTAAAGGGTGCAGTGGCTGTGCGGTGCGTCTGTGGTTAAAGGCC  
TCTGCTTAACGGAGCGTATGCCATAGAAACGGCCGTGCTTGTAGAGTGTGCGGTTGGAGGAATGTGTGGTGTAGCGGTG  
AAATGCATAGATATCACACAGAACACCAGTGGCGAAGGCATCTCACGAAGTCATATCTGACGCTGAGGACGAAAGCGTG  
GGAAT

>ASV:5673:Genus:Dialister  
TACGTAGGTGGCAAGCGTTGTCCGGAATTTATTGGGCGTAAAGCGCGCAGGCGGCTTCCCAAGTCCCTCTTAAAAGTGC  
GGGGCTTAACCCCGTGTATGGGAAGGAACTGGGAAGTGTGAGTATCGGAGAGGAAAGTGAATTCCTAGTGTAAACGGTGG  
AATGTGTAGATATCGAGAGGAACACTCGTGGCGAAGGCGGGTCTCTGGACATTAAGTACTGACGCTGAGGACGAAAGGCCAG  
GGAGC

>ASV:5674:Order:Clostridiales  
TACGTAGGGAGCAAGCGTTATCCGGATTTATTGGGTGTAAGGGTGCAGTGGGAAATTAAGTTAGTGTGAAAGGCC  
TCGGCTTAACCTAGGAATGCAACTAAAACCTGTTTCTTGTAGTGTGCGAGAGGTAAGTGAATTCCTAGTGTAGCAGTG  
AAATGCGTAGATATCGAGAGGAACACTCGTGGCGAAGGCGGGTCTCTGGACATTAAGTACTGACGCTGAGGACGAAAGGCCAG  
GGGAG

>ASV:5675:Family:Lachnospiraceae  
TACGTAGGGGGCAAGCGTTATCCGGATTTACTGGGTGTAAGGGGAGCGCAGGCGGCAAGTCTGGAGTGAAAGGCC  
GGGGCTCAACCCCGGACTGCTTTGAAACTGTAGAGTGTAGTGTGCGAGAGGCAAGCGGAATTCCTAGTGTAGCGGTG

AAATGCGTAGATATTAGGAAGAACCACAGTGGCGAAGGCGACTTTCTGGACGAAAACGACGCTGAGGCGCGAAAGCGTG  
GGAG  
>ASV:5676:Genus:Marvinbryantia  
TACGTAGGGGGCAAGCGTTATCCGGATTTACTGGGTGTAAGGGAGCGTAGACGGCAAGCAAGTCTGATGTGAAAGGCT  
GGGGCTCAACCCGGGACTGCATTGAAAAGTCTCTGCTGGAGTGCCGGAGGGGCAAGCGGAATTCCTAGTGTAGCGGTG  
AAATGCGTAGATATTAGGAGGAACACCAGTGGCGAAGGCGGCTTACTGGACGTTAACTGACGTTGAGGCGCGAAAGTGTG  
GGAG  
>ASV:5677:Family:Ruminococcaceae  
TACGTATGGTCAAGCGTTATCCGGATTTACTGGGTGTAAGGGAGCGTAGGTGGATTGTTAAGTCAGTTGTGAAATCTA  
TGGGCTCAACCATAAACTGCTTTCAAAGTGTCTTTCTTGAGTAGTGCAGAGGTAGGCGGAATTCCTAGTGTAGCGGTG  
GAATGCGTAGATATTAGGAGGAACACCAGTGGCGAAGGCGACTTACTGGACTGCAACTGACGTTGAGGCACGAAAGTGTG  
GGAG  
>ASV:5678:Kingdom:Bacteria  
TACGTAGGTGGCGAGCGTTGTCCGGATTTACTGGGCGTAAAGGGAGCGTAGGCGGATTTTAAAGTGTGATGTGAAATCTA  
CGGGCTTAACCCGGAAGTGCATCCAAAAGTATATTCTTGAGTGAAGTAGAGGTAGGCGGAATTCAGTGTAGCGGTG  
AAATGCTTAGATATCACGAAGAACTCCGATTGCGAAGGCAGCTCACTAGACTGTTACTGACACTGATGCTCGAAAGTGTG  
GGTAT  
>ASV:5679:Family:Ruminococcaceae  
TACGTAGGTGGCAAGCGTTGTCCGGATTTACTGGGTGTAAGGGAGCGTAGGCGGCTTTCGAAGTTGAATGTTAAACTA  
TCGGCTTAACCTGGTAGTCGCGTTCAAAGTGCAGGACTTGTAGTGCAGGAGGGGCAAGTGAATTCCTAGTGTAGCGGTG  
AATGCGTAGATATTAGGAGGAACACCAGTGGCGAAGGCGGCTTGTGGACTGTAAGTGCAGTGAAGGCTCGAAAGCGTG  
GGAGC  
>ASV:5680:Family:Lachnospiraceae  
TACGTAGGGGGCAAGCGTTATCCGGATTTACTGGGTGTAAGGGAGCGTAGACGGTCAAGCAAGTCAAGAGTAAAAGGCT  
GGGGCTCAACCCGGGACTGCTTTGAAAAGTGTCAAAGTGTAGAGTACAGGAGAGGAAAGCGGAATTCCTAGTGTAGCGGTG  
AAATGCGTAGAGATGGGGAGGAACACCAGTGGCGAAGGCGGCTTGTGGCTTAACTGACGCTGAGGCACGAAAGCGTG  
GGTAG  
>ASV:5681:Class:Bacteroidia  
TACGTAGGGGGCAAGCGTTATCCGGATTTACTGGGTGTAAGGGAGCGTAGACGGCGATGCAAGTCTGAAGTAAAATACC  
CGGGCTCAACCTGGGAAGTGCATTTGAAAAGTGTATGGCTAGAGTGTGGAGAGGTAGGTGGAATGCGTGGTGTAGCGGTG  
AAATGCATAGATATCACGCAGAACTCCAATTGCGAAGGCAGCTTACTAAACCATAACTGACACTGAAGCACGAAAGCGTG  
GGTAT  
>ASV:5682:Class:Gammaproteobacteria  
TACGGAGGTGCAAGCGTTAATCCGAATTTACTGGGCGTAAAGCGCACGAGGCGGTCTGTCAAGTCCGATGTGAAATCCC  
CGGGCTCAACCTGGGAAGTGCATTTGAAAAGTGTCTTCTTGAGTATCGGAGAGGCAATCGGAATTCCTAGTGTAGCGGTG  
AAATGCGTAGATATTAGGAGGAACACCAGTGGCGAAGGCGGATTGCTGGACGACAACTGACGCTGAGGCGCGAAAGCGTG  
GGAG  
>ASV:5683:Genus:Candidatus\_Stoquefichus  
TACGGAGGATCCGAGCGTTATCCGGATTTATTGGGCGTAAAGGGAGCAGGCGCAACTAGGGTCTGCGGTAAAAGACC  
GAAGCTAAACTTCGGTAAGCCGTGAAACCGAGGAGCTAGAGTGCAGTAGAGGATCGTGAATTCATGTGTAGCGGTGA  
AATGCGTAGATATTGGAAGAACACCAGTGGCGAAGGCGGCTTGTGGCTTAACTGACGCTGAGGCACGAAAGCGTG  
GTAGC  
>ASV:5684:Genus:Weissella  
TACGTATGTTCCAAGCGTTATCCGGATTTATTGGGCGTAAAGCGAGCGCAGCGGTTATTTAAGTCCGAAGTAAAAGCCC  
ACAGCTTAACTGCGGAAGTGTCTTTGAAAAGTGTGATACTTGTAGTGCAGTAGAGGAGGTGGAATCCATGTGTAGCGGTG  
AAATGCGTAGATATTGGAAGAACACCAGTGGCGAAGGCGGCTCTCTGGACTGTAAGTGCAGTTGAGGCTCGAAAGTGTG  
GGTAG  
>ASV:5685:Genus:Gemella  
TACGTAGGTGGCAAGCGTTGTCCGGATTTATTGGGCGTAAAGCGCGCAGGTGGTTCAATAAGTCTGATGTGAAAGCCC  
ACGGCTCAACCGTGGAGGGTATTGAAAAGTGTAAACTTGTAGTGCAGGAGAGAAAAGTGAATTCCTAGTGTAGCGGTG  
AAATGCGTAGAGATTAGGAGGAACACCAGTGGCGAAGGCGGCTTTTGGCTGTAAGTGCAGCTGAGGCGCGAAAGCGTG  
GGAG  
>ASV:5686:Family:Ruminococcaceae  
TACGTAGGTGGCAAGCGTTGTCCGGATTTACTGGGTGTAAGGGAGCGTAGGCGGGAGTGAAGTTGAATGTGAAAACGA  
TGGGCTCAACCATCGTTGCGTTCAAAGTGCATTTCTTGAGTGAAGTAGAGGTAAGCGGAATTCCTAGTGTAGCGGTGA  
AATGCGTAAATATTAGGAGGAACACCAGTGGCGAAGGCGGCTTACTGGCTTAACTGACGCTGAGGCTCGAAAGTGTG  
GGAGC  
>ASV:5687:Family:Ruminococcaceae  
AACGTAGGTGGCAAGCGTTGTCCGGATTTACTGGGTGTAAGGGAGCGCAGGCGGGCGATCAAGTTGGAAGTAAAATCCA  
TGGGCTCAACCATAAATTGCTTTCAAAGTGTCTGGCTTGTAGTGCAGAGGTAGGTGGAATTCCTAGTGTAGCGGTG  
AAATGCGTAGAGATTAGGAGGAACACCAGTGGCGAAGGCGGCTTTCTGGACGAAAACGACGCTGAGGCGCGAAAGCGTG  
GGAG  
>ASV:5688:Kingdom:Bacteria  
TACGTAGGGGGCGAGCGTTATCCGGATTTACTGGGTGTAAGGGTGCAGTAGGCGGCACCGTAAGTCTGTTGTGAAAGGCG  
ATGGCTTAAACATCGAAGTGAATGAAAAGTGCAGGAGCTAGAGTGCAGGAGAGGAAAGCGGAATTCCTAGTGTAGCGGTG  
AAATGCTTAGATATCACGAAGAACTCCGATTGCGAAGGCAGCTGCTGGACTGTAAGTGCAGCCGATGCTCGAAAGTGTG  
GGTAT  
>ASV:5689:Genus:Faecalitalea

TACGTAGGGGGCAAGCGTTATCCGGAATCATTGGGCGTAAAGGGTGCCTAGGTGGCACGATACGTCTGAAGTAAAAGGCA  
ACAGCTCAACTGTTGTATGCTTTGGAAACTGTGAGCTAGAGTGCAGAAGAGGGCGATGGAATTCATGTGTAGCGGTAA  
AATGCGTAGATATCGGGAGGAACACCAGTGGCGAAGGCGACCTACTGGGCACCAACTGACGCTGAGGCTCGAAAGCATGG  
GTAGC

>ASV:5690:Genus:Christensenellaceae\_R-7\_group

TACGTAGGGGGCGAGCGTTGTCCGGAATGACTGGGCGTAAAGGGCGTGTAGGCGGCTTTTTAAGTGTGGAGTAAAAGTCC  
ACTTTTCAAGGGTGAATTGCTTTGCAGACTGGAGAGCTTGTAGTGCAGGAAGAGGGAAGTGAATTCACGGTGTAGCGGTG  
AATGCGTAGATATCGGGAGGAACACCAGTGGCGAAGGCGGCTACTGGGCACCAACTGACGCTGAGGCTCGAAAGTGTG  
GGTAG

>ASV:5691:Genus:Alistipes

TACGGAGGACCCGAGCGTTATCCGGATTTATTGGGTTAAAGGGTGCCTAGGCGGATTAGTAAGTTAGAGGTGAAAAGCTC  
GATGCTCAACATCGAAATGCTCTGATACTGTTAGTCTAGAGTATAGTTGCGGAAGGCGGAATGTGTGGTGTAGCGGTG  
GAATGCGTAGATATCGGGAGGAACACCAGTGGCGAAGGCGACCTACTGGGCACCAACTGACGCTGAGGCACGAAAGCGTG  
GGGAG

>ASV:5692:Genus:Ruminiclostridium

TACGTAGGGAGCGAGCGTTGTCCGGATTTACTGGGTGTAAGGGCGTGCAGCCGGGCTTACAAGTCAGATGTGAAATCCC  
GCGGCTTAACCGGGAAGTGCATTTGAAACTGTAGGCTTGTAGTACTGGAGAGGCGAGGCGGAATTCCTAGTGTAGCGGTG  
AAATGCGTAGATATTAGGAGGAACACCAGTGGCGAAGGCGGCTGCTGGACAGCAACTGACGCTGAGGCGGAAAGTGTG  
GGTAG

>ASV:5693:Genus:Oscillibacter

AACGTAGGTACAAGCGTTGTCCGGAATTAAGGGTGTAAAGGGCGTGTAGCCGGGCTGATAAGTCAGATGTGAAATCTG  
GAGGCTTAACCTCAAACTGCATTTGAAACTGTAGGCTTGTAGTACCAGGAGAGGTTATCGGAATTCCTGTGTAGCGGTG  
AAATGCGTAGATATAAGGAAGAACACCAGTGGCGAAGGCGGTAAGTGGACGCAACTGACGCTCATGTGCGAAAGCCAG  
GGCGG

>ASV:5694:Family:Lachnospiraceae

TACGTAGGGGGCAAGCGTTATCCGGATTTACTGGGTGTAAGGGAGCGTAGACGGCAAGGCAAGTCTGATGTGAAAACCC  
GGGGCTTAACCCGGGACTGCTTTGAAACTGTGTAGCTTGTAGTACCAGGAGGGTAAGCGGAATTCCTAGTGTAGCGGTG  
AAATGCGTAGATATCGGGAGGAACACCAGTGGCGAAGGCGGCTACTGGGCTTAACTGACGCTGAGGCACGAGAGCATG  
GGTAG

>ASV:5695:Genus:Clostridium\_sensu\_stricto\_1

TACGTAGGTGGCAAGCGTTGTCCGGATTTACTGGGCGTAAAGGGAGCGTAGGCGGACTTTTTAAGTGTAGATGTGAAATACC  
CGGGCTCAACTTGGGTGCTGCATTTCAAAGTGTAGAGTGCAGGAGAGGAGAATGGAATTCCTAGTGTAGCGGTG  
AAATGCGTAGATATTAGGAGGAACACCAGTGGCGAAGGCGGCTTGTGGACAGTAACTGACGCTGAGGCTCGAAAGCGTG  
GGGAG

>ASV:5696:Family:Ruminococcaceae

TACGTAGGGGGCAAGCGTTATCCGGATTTACTGGGTGTAAGGGAGCGTAGACGGTTTTGCAAGTCTGGCGTGAATCTA  
TGGGCTTAACCCATAAACTGCCTTTGAAACTGTCTTGGCTTGTAGTGAAGTAGAGGTAGGCGGAATTCACGGTGTAGCGGTG  
AAATGCGTAGATATTAGGAGGAACACCAGTGGCGAAGGCGGCTTCTGGACGAAAAGTGTAGGCTGAGGCGGAAAGCGTG  
GGGAG

>ASV:5697:Family:Christensenellaceae

TACGGAGGATTCAAGCGTTATCCGGATTTATTGGGTTAAAGGGTGCCTAGGCGGCTGGTAAGTCAGATGTGAAATACC  
CGTGCTCAACATGGGGGGTGCATCTGATACTGTTAGGCTTGTAGTGCAGGAGAGGAAAGCGGAATTCCTAGTGTAGCGGTG  
AAATGCGTAGATATTAGGAGGAACACCAGTGGCGAAGGCGGCTTCTGGACTGTAAGTGTAGGCTGAGGCACGAAAGCGTG  
GGGAG

>ASV:5698:Genus:Anaerofilum

TACGTATGGTGAAGCGTTATCCGGATTTACTGGGTGTAAGGGAGCGCAGGCGGAAGTCAAGTTGGATGTCAAATCTA  
CGGGCTCAACCCGATACGCATTCAAAGTGCAGGCTTGTAGTGCAGGAGGAAAGCGGAATTCCTAGTGTAGCGGTG  
AATGCTTAGATATCACGAAGAACTCCGATTGCGAAGGCGGCTGCTAAGCTGCAACTGACATTGAGGCTCGAAAGTGTGG  
GCATC

>ASV:5699:Genus:Anaerofilum

TACGGAGGATCCGAGCGTTATCCGGATTTACTGGGTGTAAGGGTGCCTAGGCGGCTGTTAAGTCAAGCGGTGAAATCTA  
TGGGCTCAACCCATAAACTGCTTTCAAAGTGTCTTGTAGTGCAGGAGGTAAGGCGGAATTCACGGTGTAGCGGTG  
GAATGCGTAGATATCGGGAGGAACACCAGTGGCGAAGGCGGCTCCTGGACGCAACTGACGCTCATAACGAAAGCGTG  
GGGAG

>ASV:5700:Genus:Solobacterium

TACGTAGGTGGCGAGCGTTATCCGGAATTTATTGGGCGTAAAGGGTGCCTAGGCGGCTGTTAAGTAAGTGGTTAAATTGT  
TGGGCTCAACCCAACTCAGCCACTTAAAGTGCAGGCTAGAGTATTGGAGAGGCAAGTGAATTCATGTGTAGCGGTAA  
AATGCGTAGATATTAGGAGGACACCAGTGGCGAAGGCGGATTGCTGGACGACAACTGACGCTGAGGCTCGAAAGCGTG  
GGAGC

>ASV:5701:Class:Deltaproteobacteria

TACGTAGGGTGAAGCGTTATCCGGAATTTATTGGGCGTAAAGGGTGCCTAGACGGGAAGGTAAGTTAGTTGTGAAATCCC  
TCGGCTCAACTGAGGAACTGCGATTAAGTGCCTTTTCTTGTAGTACCAGGAGAGGTTGGCGGAATTCAGGTGTAGGAGTG  
AAATCCGTAGATATCTGGAGGAACACCAGTGGCGAAGGCGGCTGCTGGACGTAAGTGTAGGCTGAGGCTCGAAAGCGTG  
GGTAG

>ASV:5702:Order:Lactobacillales

AACGTAGGGTGAAGCGTTATCCGGAATTTACTGGGTGTAAGGGTGCCTAGGCGGCTGATGCAAGTCATATGTGAAATGTG  
AGGGCTTAACCTTGGCGCTGCATTTGAAAGTGCAGGCTTGTAGTGCAGAAAGGAGAGTGAAGTCCATGTGTAGCGGTG  
AAATGCGTAGATATATTAGGAGGAACACCAGTGGCGAAGGCGGCTCCTGGTCTGTAAGTGTAGGCTGAGGCTCGAAAGCGTG

GGTAG

>ASV:5703:Genus:Parasutterella

TACGTAGGGAGCGAGCGTTGTCCGGAATTACTGGGCGTAAAGGGTGCAGCGGTTGAGTAAGACAGATGTGAAATCCC  
CGAGCTTAACCTCGGAATGGCATATGTGACTGCTCGACTAGAGTGTGTGAGAGGGAGGTGGAATCCACGTGTAGCAGTG  
AAATGCGTAGATATGTGGAAGAACCACCGATGGCGAAGGCAGCTCCTGGACATAACTGACGCTCAGGCACGAAAGCGTG  
GGGAG

>ASV:5704:Class:Bacteroidia

TACGTAGGGGGCAAGCGTTGTCCGGAATTACTGGGCGTAAAGGGCGCTAGGCGGCCTGGTAAGTTTGAAGTAAAAGTCC  
TTCTTTTAAGGAGGGAAGTGTCTTGAAGAACTGTCGGGCTTGTAGTGCAGGAGAGGTAAAGCGGAATTCGTGGCGTAGCGGTG  
AAATGCTTAGATATCACGAAGAACCCTGATTGCGAAGGCAGCTTACTAACCTGTAAGTACATTGATGCTCGAAAGTGTG  
GGTAT

>ASV:5705:Genus:Negativibacillus

TACGTAGGTGGCAAGCGTTATCCGGAATTACTGGGTGTAAGGGAGCGTAGGCGGGGAGACAAGTTGAATGTCTAAACTA  
TCGGCTCAACTGATAGTCGCGTTCAAAGCTATCACTCTTGTAGTGCAGTAGAGGTAGGCGGAATTCCTAGTGTAGCGGTGA  
AATGCTTAGATATCACGAAGAACCCTGATTGCGAAGGCAGCTTCTAACTGTAAGTACGTTATGCTCGAAAGTGTG  
GTATC

>ASV:5706:Genus:Parabacteroides

TACGGAGGATGCGAGCGTTATCCGGATTTATTGGGTTAAAGGGTGCAGTGGTGGTATTTAAGTCAGCGGTGAAAGTTT  
GTGGCTCAACCATAAAATTGCCGTTGAAACTGGGTTACTTGTAGTGTGTTGAGGTAGGCGGAATGTATGGTGTAGCGGTG  
AAATGCTTAGGATCATAACAGAACCCTGATTGCGAAGGCAGCTTGTGACTGTAAGTACGCTGATGCTCGAAAGTGTG  
GGTAT

>ASV:5707:Family:Ruminococcaceae

TACGTAGGTGGCAAGCGTTGTCCGGAATTTACTGGGTGTAAGGGCGTGCAGCCGGGCGGCAAGTCAGATGTGAAATCTG  
GAGGCTTAACCTCAAAGTGCATTTGAAACTGTAGGCTTGTAGTACCGGAGAGGTTATCGGAATTCCTCGTGTAGCGGTG  
AAATGCTTAGAGATCATAACAGAACCCTGATTGCGAAGGCAGCTTACCAAATATATCTGACGTTGAGGCACGAAAGCGTG  
GGGAG

>ASV:5708:Genus:Bacteroides

TACGGAGGATGCGAGCGTTATCCGGATTTATTGGGTTAAAGGGTGCAGTGGTGGTATTTAAGTCAGCAGTAAAAGTTT  
GTGGCTCAACCATAAAATTGCAGTTGAAACTGGCAGTCTTGTAGTACAGTAGAGGTGGCGGGATTCTGTGGTGTAGCGGTG  
AAATGCTTAGATATCACGAAGAACCCTGATTGCGAAGGCAGCTTGTAACTGTAAGTACGCTTCTGCTCGAAAGTGTG  
GGTAT

>ASV:5709:Genus:Oscillibacter

TACGTAGGTGGCGAGCGTTGTCCGGAATTTACTGGGTGTAAGGGCGTGCAGCCGGGCTGGTAAGTCAGATGTGAAATCCC  
TGGGCTCAACCACGAAGTGCATTTGAAACTGCTGGTCTTGTAGTATCGGAGAGGTAACCGGAATTCCTAGTGTAGCGGTG  
AAATGCGTAGATATTAGGAAGAACCACAGTGGCGAAGGCAGCTTGTGACGACAAGTACGCTGAGGCAGGCGAAAGCGTG  
GGGAG

>ASV:5710:Genus:Ruminococcaceae\_UCG-002

TACGTAGGTGGCAAGCGTTGTCCGGAATTTACTGTGTGTAAGGGCGTGCAGCCGGGCTGCAAGTCAGATGTGAAATCCA  
TGGGCTCAACCATGAAGTGCATTTGAAACTGTAGATCTTGTAGTGCAGGAGGGCAATCGGAATTCCTAGTGTAGCGGTG  
AAATGCGTAGAGATTGGAAGAACCACAGTGGCGAAGGCAGCTTGTGGGCCGTAAGTACGCTGAGGCAGGCGAAAGCGTG  
GGGAG

>ASV:5711:Family:Ruminococcaceae

AACGTAGGGAGCGAGCGTTGTCCGGAATTTACTGGGTGTAAGGGAGCGCAGGCGGGAAGACAAGTTGGAAGTAAAACCA  
TGGGCTCAACCATAAACTGCAGTTGAAACTGTATGTCTTGTAGTGCAGGAGAGGTAATCGGAATTCCTTGTGTAGCGGTG  
AAATGCGTAGATATTAGGAGGAACCACAGTGGCGAAGGCAGCTTGTGGACGACAAGTACGCTGAGGCAGGCGAAAGCGTG  
GGGAG

>ASV:5712:Genus:Candidatus\_Stoquefichus

TACGTAGGTGGCGAGCGTTATCCGGAATTTATTGGGCGTAAAGAGGGAGCAGGTGGCAGCTAAGGCTGCGGTGAAAGCCC  
GAAGCTAAACTTCGGTAAGCCGTGGAACCGAGCAGCTAGAGTGCAGTAGAGGATCGTGAATTCATGTGTAGCGGTGA  
AATGCGTAGATATATGGAGGAACCACAGTGGCGAAGGCAGCATCTGGGCTGCAACTGACGCTCAGTCCGAAAGCGTGG  
GGAGC

>ASV:5713:Order:Clostridiales

TACGTAGGGGGCGAGCGTTGTCCGGAATGATTGGGCGTAAAGGGCGCTAGGCGGCCTGCTAAGTCTGGAGTAAAAGTCC  
TGCTTTCAAGGTGGGAAGTGCATTTGAAACTGTAGATCTTGTAGTGCAGGAGGGCAATCGGAATTCCTAGTGTAGCGGTG  
AAATGCGTAGATATTAGGAGGAACCACAGTGGCGAAGGCAGATTGCTGGACGGTAAGTACGCTTGGGCTCGAAAGCGTG  
GGGAG

>ASV:5714:Kingdom:Bacteria

TACGGAGGATCCGAGCGTTATCCGGATTTATTGGGTTAAAGGGAGCGTAGACGGTCAAGCAAGTCAGAAGTAAAAGGCT  
GGGGCTCAACCCGGGACTGCTTTTGAAGCTTTTACTAGAGTGTGAGAGGGTAAGCGGAATTCCTAGTGTAGCGGTG  
AAATGCTTAGATATCACGAAGAACCCTGATTGCGAAGGCAGCTTGTGACTGTAAGTACGCTGATGCTCGAAAGTGTG  
GGTAT

>ASV:5715:Genus:Oscillibacter

TACGTAGGTGGCAAGCGTTGTCCGGAATTTACTGGGTGTAAGGGCGTGCAGCCGGGCGGCAAGTCAGATGTGAAATCTG  
GCGGCTTAACCTCAAAGTGCATTTGAAACTGTAGGCTTGTAGTACCGGAGAGGTTATCGGAATTCCTTGTGTAGCGGTG  
AAATGCTTAGATATCACGAAGAACCCTGATTGCGAAGGCAGCTTGTGACTGTAAGTACGCTGATGCTCGAAAGTGTG  
GGTAT

>ASV:5716:Genus:Erysipelotrichaceae\_UCG-003

TACGTATGGTCAAGCGTTATCCGGAATTTATTGGGCGTAAAGAGGGAGCAGGCGGCACTAAGGCTCTGTGGTAAAAGATC



>ASV:5730:Family:Ruminococcaceae  
TACGTAGGGGGCAAGCGTTGTCCGGATTTACTGGGTGTAAAGGGTGCCTAGGCGAACTGCAAGTCAGTGGTGAATCTG  
AGGGCTCAACCTCAAAGTGCATTGAAACTGTGGTCTTGTAGTGAAGTAGAGGTAGGCGGAATTCCTAGTGTAGCGGTG  
GAATGCGTAGATATCGGAGGAACACCAGTGGCGAAGGCGGCTACTGGGCTTAACTGACGCTGAGGCACGAAAGCATG  
GGTAG

>ASV:5731:Family:Lachnospiraceae  
TACGTATGGTGAAGCGTTATCCGGATTTACTGGGTGTAAAGGGAGCGTAGACGGATGGACAAGTCTGATGTGAAAGGCT  
GGGGCTCAACCCGGGACTGCTTTGAAACTGCCCGTCTTGTAGTGCAGGAGAGGTAAGCGGAATTCCTAGTGTAGCGGTG  
AAATGCGTAGATATTAGGAGGAACACCAGTGGCGAAGGCGGCTCTGGGACATAACTGACGCTGAGGCTCGAAAGCGTG  
GGGAG

>ASV:5732:Family:Lachnospiraceae  
TACGTATGGTGAAGCGTTATCCGGATTTACTGGGTGTAAAGGGAGCGCAGGCGGTACGGCAAGTCTGATGTGAAAATCC  
GGGGCTCAACCCGGGACTGCTTTGAAACTGTAAAGCTAGAGTGCAGGAGGGGTGAGTGAATTCCTAGTGTAGCGGTG  
AAATGCTTAGATATCAGGAAGAACTCCGATTGCGAAGGCGGCTGCTGGACTGTAAGTACGCTGATGCTCGAAAGTGTG  
GGTAT

>ASV:5733:Family:Lachnospiraceae  
AACGTATGGTGAAGCGTTATCCGGATTTACTGGGTGTAAAGGGAGCGCAGGCGGTACGGCAAGTCTGATGTGAAAGGCC  
AGGGCTCAACCCGGGACTGCTTTGAAACTGTAAAGCTAGAGTGCAGGAGAGGTAAGCGGAATTCCTAGTGTAGCGGTG  
GAATGCGTAGATATCGGAGGAACACCAGTGGCGAAGGCGGCTACTGGGCACCAACTGACGCTGAGGCTCGAAAGCATG  
GGTAG

>ASV:5734:Genus:Anaerofilum  
TACGTATGGAGCAAGCGTTATCCGGATTTACTGGGTGTAAAGGGTGCCTAGGTGGCAGTGAAGTCAGATGTGAAAGGCC  
GGGGCTCAACCCGGGACTGCTTTGAAACTGTTTTCTTGTAGTGCAGAGGTAGGCGGAATTCCTAGTGTAGCGGTG  
GAATGCGTAGATATCGGAGGAACACCAGTGGCGAAGGCGGCTACTGGGCACCAACTGACGCTGGGCTCGAAAGTGTG  
GGTAG

>ASV:5735:Species:desulfuricans/intestinalis/simplex  
TACGGAGGGTCAAGCGTTAATCCGAATTTACTGGGCGTAAAGCGCACGTAGGCTGCTTTGTAAGTCAGGGGTGAAATCCC  
ACGGCTCAACCCGGGACTGCTTTGAAACTGCTTACTGCTTAACTCCGGGAGAGGGTGGCGGAATTCCTAGTGTAGGAGTG  
AAATCCGTAGATATCTGGAGGAACATCAGTGGCGAAGGCGGCACCTGGACCGGATTGACGCTGAGGTGCGAAAGCGTG  
GGGAG

>ASV:5736:Genus:Family\_XIII\_AD3011\_group  
TACGTAGGGGGCAAGCGTTATCCGGATTTACTGGGCGTAAAGAGTGCCTAGGTGGTTACCTAAGCAGGGGGTGAAGGCA  
CTGGCTTAACCAATGTACAGCCCTGAACTGGGTACCTTGTAGTGCAGGAGAGGAAAGCGGAATTCCTAGTGTAGCGGTG  
AATGCTTAGATATCAGGAAGAACTCCGATTGCGAAGGCGGCTGCTAAGCTGCAACTGACATTGAGGCTCGAAAGTGTGG  
GTATC

>ASV:5737:Order:Clostridiales  
TACGGAGGATCCGAGCGTTATCCGGATTTACTGGGTTAAAGGGCGTGCAGGCGGGTCTGCAAGTCAGATGTGAAATCCA  
TGGGCTCAACCCATGAACTGCACTTTGAAACTGTAGATCTTGTAGTGTGAGGAGGGCAATCGGAATTCCTAGTGTAGCGGTG  
AAATGCGTAGATATTAGGAGGAACACCAGTGGCGAAGGCGGCTCTGGGCCGAGACGACGCTGAGGCGCGAAAGCTGG  
GGGAG

>ASV:5738:Order:Clostridiales  
TACGTAGGGGGCTAGCGTTATCCGGATTTACTGGGCGTAAAGGGTGCCTAGGTGGTTTCTTAAGTCAGAGGTGAAAGGCT  
ACGGCTCAACCCGTAGTAAGCCTTTGAAACTGGGAACTTGTAGTGCAGGAGAGGAGAGTGAATTCCTAGTGTAGCGGTGG  
AATGCGTAGATATCGGAGGAACACCAGTGGCGAAGGCGGCTACTGGGCACCAACTGACGCTGAGGCTCGAAAGCATGG  
GTAGC

>ASV:5739:Genus:Barnesiella  
TACGTAGGGGGCAAGCGTTATCCGGATTTACTGGGTGTAAAGGGAGCGTAGACGTTTTGCAAGTCTGAGGTGAAAGGCC  
GGGGCTTAACCCGGGACTGCTTTGAAACTGTAGAAGTGTAGTGCACAAGAGGCGAGGCGGAATGCGTGGTGTAGCGGTG  
AAATGCATAGATATCAGCAGAACCCGATTGCGAAGGCGGCTGCTAGGGTGAACAGACGCTGAGGCACGAAAGCGTG  
GGTAT

>ASV:5740:Family:Ruminococcaceae  
TACGTAGGGAGCGAGCGTTGTCCGGATTTACTGGGTGTAAAGGGTGCCTAGGCGGCTAGACAAGTCAGGTGTGAAATACC  
GCAGCTCAACTGCGGGCTGCCTTTGAAACTGTAGAGCTTGTAGTGTGAGAGGTAAGCGGAATTCCTAGTGTAGCGGTG  
AAATGCGTAGATATTAGGAGGAACACCAGTGGCGAAGGCGGCTACTGGACTGACAATGACGCTGAGGCTCGAAAGCATG  
GGTAG

>ASV:5741:Genus:Ruminococcaceae\_UCG-005  
TACGTAGGTTGCGAGCGTTGTCCGGATTTACTGGGTGTAAAGGGCGTGTAGGCGGAGATGCAAGTTGGGAGTGAATCCA  
TGGGCTCAACCCATGAACTGCTTTCAAAGTGTATCCCTTGTAGTATCGGAGAGGCAAGCGGAATTCCTAGTGTAGCGGTG  
AAATGCGTAGATATCAGGAAGAACTCCGATTGCGAAGGCGGCTACTAAACCATAACTGACACTGAAGCACGAAAGCGTG  
GGGAT

>ASV:5742:Order:Clostridiales  
TACGGAGGATCCGAGCGTTATCCGGATTTACTGGGTTAAAGGGTGCCTAGGCGGCTTTTAAAGTCAGCGGTGAAAGTCT  
GTGGCTCAACCATAGAATTGCCGTTGAAACTGTCTAGCTAGAGTGCAGGAGAGGTAAGCGGAATTCCTAGTGTAGCGGTG  
AAATGCGTAGATATTAGGAGGAACACCAGTGGCGAAGGCGGCTACTGGACTGTAAGTACGCTTGGGCTCGAAAGTGTG  
GGTAG

>ASV:5743:Family:Ruminococcaceae  
TACGTATGGGGCAAGCGTTATCCGGATTTACTGGGTGTAAAGGGAGCGTAGGCGGACCGCAAGTTGGGAGTGAATCCA  
TGGGCTCAACCCGTGAATGCTTTCAAAGTGTGGCCTTGTAGTGTAGTGCAGAGGTAGGTGAATTCCTAGTGTAGCGGTG





TACGTAGGGGCGAGCGTTGTCCGGAATTATTGGGCGTAAAGAGTACGTAGGCGGTTTGTCTAAGCGCAAGGTGAAAGGCA  
GCGGCTTAACCAATTGTAAGCCTTGCGAACTGACAGACTTGAGTGCAGGAGAGGAAAGCGGAATTCCTAGTGTAGCGGTGA  
AATGCGTAGATATGACGCAGAACTCCGATTGCGAAGGCAGCATACCAACTCGCGACTGACGCTGAGGCTCGAAAGCGTGG  
GTATC

>ASV:5758:Family:Lachnospiraceae

TACGTATGGTCAAGCGTTATCCGGATTTACTGGGTGTAAGGGAGCGCAGGCGGTGCGGCAAGTCTGATGTGAAAGCCC  
GGGGCTCAACCCCGTACTGCATTGGAACCTGATCAGCTAGAGAACAAGAGGACGCGCGAACTCCATGTGTAGCGGTG  
AAATGCGTAGATATCGGAGGAACACCAGTGGCGAAGGCGGTTACTGGACCATTACTGACGCTGAGACACGAAAGCGTG  
GGGAG

>ASV:5759:Family:Lachnospiraceae

AACGTAGGTCAAGTGTTCGGAATTACTGGGTGTAAGGGAGCGCAGGCGGGAGAACAAGTTGGAAGTAAAACCC  
AGGGCTTAACCTGCGACTGCTTTTGAACCTGAGGCTGGAGTGCAGGAGAGGCAAGTGAATTCTAGTGTAGCGGTG  
AAATGCGTAGATATTAGGAGGAACACCAGTGGCGAAGGCAGCTTGTCTGGACTGTAACGACGCTGAGGCGGAAAGTGTG  
GGTAG

>ASV:5760:Genus:Ruminiclostridium\_5

TCCTTCTTTCTCTCTTTTCTTTCTTTCTTTGTTTAAAGGGTGCCTAGGCGGCTCTGCAAGTCAAGTGAATCCA  
TGGGCTTAACCATGAACCTGCTTTTGAACCTGAGAGCTTGAAGTGAAGTAGAGGTAGGCGGAATTCCTGGTGTAGCGGTG  
AAATGCGTAGATATCGGAGGAACACCAGTGGCGAAGGCGGCTACTGGCTTTAACGACGCTGAGGCACGAAAGCATG  
GGTAG

>ASV:5761:Order:Bacteroidales

TACGTAGGGGCGAAGCGTTATCCGGATTTACTGGGTGTAAGGGAGCGTAGACGGCGAAGCAAGTCTGAAGTAAAATCCC  
GGGGCTTAACCTCGGAACCTGCTTAATACTGTTAGACTAGAGAGTAGTTGCGGTAGGCGGAATGTATGGTGTAGCGGTG  
AAATGCTTAGAGATCATACAGAACACCAGTGGCGAAGGCAGTCTCTGGGCCGTTACTGACGCTGAGGAGCGAAAGCGTG  
GGGAG

>ASV:5762:Genus:Anaerostipes

TACGTAGGGGCGAAGCGTTATCCGGATTTACTGGGTGTAAGGGTGCCTAGGTGGCAGGGCAAGTCAAGTGAAGGCC  
GGGGCTTAACCTCGGACTGCTTTTGAACCTGCCAGGCTGGAGTGCAGGAGAGGTAAGCGGAATTCCTAGTGTAGCGGTG  
AAATGCGTAGATATTAGGAGGAACATCAGTGGCGAAGGCGGCTTACTGGACTGAAACTGACACTGAGGCACGAAAGCGTG  
GGGAG

>ASV:5763:Family:Family\_XIII

TACGTAGGGGCGAGCGTTATCCGGATTTATTAGGCGTAAAGAGTGCCTAGGTGGCACCTTAAGCGCAGGGTTTAAAGCA  
ATGGCTCAACCAATTGTCGCTTTCGAACTGGGGTGCCTTGAAGTGCAGGAGGGGAAAGTGAATTCCTAGTGTAGCGGTG  
AAATGCGTAGATATTAGGAGGAACACCAGTGGCGAAGGCAGCTTTCTGGACTGTTACTGACACTGAGGCACGAAAGCGTG  
GGAGC

>ASV:5764:Family:Lachnospiraceae

TACGGAGGGTCAAGCGTTAATCCGGAATTACTGGGCGTAAAGCGCACGAGGCGGTCTGTCAAGTCTGATGTGAAAGGCC  
GGGGCTTAACCCCGGACTGCATTGGAACCTGCAATCAGTACCGGAGGGTAAGTGAATTCCTAGTGTAGCGGTG  
AAATGCTTAGATATCAGGAAGAATCCGATTGCGAAGGCAGCTGCTAAGCTGCAACTGACATTGAGGCTCGAAAGTGTG  
GGTAT

>ASV:5765:Family:Erysipelotrichaceae

TACGTAGGTGGCGAGCGTTATCCGGAATCATTGGGCGTAAAGGGTGCCTAGGCGGCGAGTTAAGTCTGAGGTAAAAGTT  
GCAGCTCAACTGTAACAAGCCTTGGAACTGACTGGCTAGAGTGCAGGAGAGGGCAAGTGAATTCCTAGTGTAGCGGTAA  
AATGCGTAGATATTAGGAGGAACACCAGTAGCGAAGGCGGCTGCTGGACTGTTACTGACACTGAGGCACGAAAGCGTG  
GGAGC

>ASV:5766:Family:Christensenellaceae

TACGTAGGGAGCAAGCGTTGTCCGGAATTACTGGGCGTAAAGGGTGCCTAGGTGGCTATGCAAGTCAAGTGTGAAAGACC  
GGGGCTTAACCCCGGACTGCATTGGAACCTGTTGGCTTGAAGTGCAGGAGAGGGAAAGTGAATTCCTAGTGTAGCGGTG  
AAATGCTTAGATATCAGGAAGAATCCGATTGCGAAGGCAGCTGCTAAGCTGCAACTGACATTGAGGCTCGAAAGTGTG  
GGCAT

>ASV:5767:Genus:Fusicatenibacter

TACGGAGGGGCAAGCGTTATCCGGATTTACTGGGTGTAAGGGAGCGTAGACGGCAAGCAAGTCTGATGTGAAAACCC  
AGGGCTTAACCCCGGACTGCATTGGAACCTGCTGGCTCGAGTGCCGGAGAGGTAAGCGGAATTCCTAGTGTAGCGGTG  
AAATGCGTAGATATACAGAACACCAGTGGCGAAGGCAGCTTACCAACTATATCTGACGTTGAGGCACGAAAGCGTG  
GGGAG

>ASV:5768:Genus:Parvimonas

TACGTAGGGGCTAGCGTTATCCGGATTTACTGGGCGTAAAGGGTACGTAGGCGGCTTTTAAAGTCAAGTGTGAAAGCGT  
GAGGCTTAACCTCATTAAAGCACTTGAACCTGGAAGGCTTGAAGTGAAGGAGAGGAAAGTGAATTCCTAGTGTAGCGGTG  
AAATGCGTAGATATTAGGAGGAACACCAGTGGCGAAGGCGGCTTACTGGACGATAACTGACGCTGAGGCTCGAAAGCGTG  
GGAGC

>ASV:5769:Family:Lachnospiraceae

TACGTAGGTGGCAAGCGTTGTCCGGAATTACTGGGTGTAAGGGGCGTGCAGCAGGGCTGGTAAAGTCAAGTGTGAAAGCCT  
GAGGCTCAACCCCGGAATTGCTTTTGAACCTGCAAACTAGAGTGTGCGAGGGGTAAGCGGAATTCCTAGTGTAGCGGTG  
AAATGCGTAGATATTAGGAGGAACACCAGTGGCGAAGGCGGCTTACTGGACGATAACTGACGCTGAGGCTCGAAAGCGTG  
GGGAG

>ASV:5770:Genus:Anaerostipes

TACGGAGGATCCGAGCGTTATCCGGATTTACTGGGTGTAAGGGTGCCTAGGTGGTATGGCAAGTCAAGTGAAGAACCC  
AGGGCTTAACCTGCGACTGCTTTTGAACCTGTCAGACTGGAGTGCAGGAGAGGTAAGCGGAATTCCTAGTGTAGCGGTG  
AAATGCGTAGATATTAGGAGGAACATCAGTGGCGAAGGCGGCTACTGGCTTTAACGACGCTGAGGCACGAAAGCATG

GGTAG

>ASV:5771:Family:Lachnospiraceae

TACGTATGGTGCAAGCGTTATCCGGATTTACTGGGTGTAAGGGGAGCGCAGGCGGAAGGCTAAGTCTGATGTGAAAAGCCC  
GGGGCTTAACCCCTGACTGCATTGAAACTGCTGTCTTGAAGTCCGGAGGGTAAGCGGAATTCCTAGTGTAGCGGTG  
AATGCGTAGATATTAGGAGGAACACCAGTGGCGAAGGCGGCTTACTGGACTGTAACGACGTTGAGGCTCGAAAGCGTG  
GGGAG

>ASV:5772:Genus:Candidatus\_Stoquefichus

TACGTAGGTGCGAGCGTTATCCGGATTTACTGGGCGTAAAGGGAGCGCAGGCGGAGTGCAGGCTGCGGTGAAAAGCCC  
GAAGCTAAACTTCGGTAAGCCGTGAAACCGCACAGCTAGAGAGTATCAGAGGATCGCGGAATTCATGTGTAGCGGTGA  
AATGCGTAGATATCACGAAGAACTCCGATTGCGAAGGCGAGCTACTAGACTGCAACTGACACTGATGCTCGAAAGTGTGG  
GTATC

>ASV:5773:Order:Bacteroidales

TACGTAGGGAGCAAGCGTTATCCGGATTTATTGGGTGTAAGGGTGCCTAGGTGGTTTCTTAAGTCAAGGTGAAAAGGCT  
ACGGCTCAACCGTAGTAAGCCTTTGAAACTGGGAACTTGAAGTGCAGTACAGGTTGGGCGGAATTCGTGGTGTAGCGGTGA  
AATGCTTAGATATCACGAAGAACTCCGATTGCGAAGGCGAGCTACTAGACTGCAACTGACACTGATGCTCGAAAGTGTGG  
GTATC

>ASV:5774:Genus:Sellimonas

TACGTAGGGTGCAAGCGTTATCCGGATTTATTGGGCGTAAAGGGAGCGTAGACGGCACGGCAAGCCAGATGTGAAAACCC  
AGGGCTCAACCCCTGGGACTGCTTTGAAACTGCAGATCTGGAGTCCCGGAGAGGTAAGCGGAATTCCTAGTGTAGCGGTG  
AATGCGTAGATATTAGGAGGAACACCAGTGGCGAAGGCGGCTTACTGGACGGTGACTGACGTTGAGGCTCGAAAGCGTG  
GGGAG

>ASV:5775:Family:Erysipelotrichaceae

TACGTAGGGGGCAAGCGTTATCCGGATTTATTGGGCGTAAAGGGTGCAGGCGGTTTGAAAAGTTTAAAGTAAAAGCGT  
GGGGCTTAACCCCATACAGCCTTAGAAACTGTACTACTTGAAGTGCAGGAGGGTAAGCGGAATTCCTAGTGTAGCGGTGA  
AATGCGTAGATATTAGGAGGAACACCAGTGGCGAAGGCGGCTTACTGGACGGTAACTGACGTTGAGGCTCGAAAGCGTG  
GGAGC

>ASV:5776:Kingdom:Bacteria

TACGGAGGATCCGAGCGTTATCCGGATTTATTGGGTTTAAAGGGAGCGTAGGCGGCACGCCAAGCCAGATGTGAAAAGCCC  
GAGGCTTAACCTCGCGATTGCATTTGAACTGGCGAGCTAGAGTACAGGAGAGGAAAGCGGAATTCCTAGTGTAGCGGT  
GAAATGCGTAGATATTAGGAAGAACTCCGATTGCGAAGGCGAGCTACTAGACTGCAACTGACACTGATGCTCGAAAGTGT  
GGTA

>ASV:5777:Family:Lachnospiraceae

TACGTAGGGAGCAAGCGTTATCCGGATTTACTGGGTGTAAGGGGAGCGTAGACGGTTTTGCAAGTCTGAAGTAAAAGCCC  
GGGGCTTAACCCCGGACTGCTTTGAAACTGTAGGACTAGAGTGCAGGAGAGGTAGGCGGAATGTATGGTGTAGCGGTG  
AATGCTTAGAGATCATACAGAACACCAGTGGCGAAGGCGGCTTACCAAATATATCTGACGTTGAGGCACGAAAGCGTG  
GGGAG

>ASV:5778:Genus:Cricetibacter

TACGGAGGATCAAGCGTTATCCGGATTTATTGGGCGTAAAGCGAGCGCAGGCGGTTTTGATAAGTCTGAAGTTAAAGGCT  
GTGGCTCAACCATAGTTCGCTTTGAAACTGTCAAATCTGAGTGCAGAGGGGAGAGTGAAGTCCCGTGTAGCGGTGA  
AATGCGTAGAGATGTGGAGGAATACCGAAGGCGAAGGCGGCCCTTGGGAATGACTGACGCTCATGTGCGAAAGCGTG  
GGAGC

>ASV:5779:Genus:Dielma

TACGTAGGTGGCAAGCGTTATCCGGATTTATTGGGCGTAAAGGGTGCCTAGGCGGCGAGATAAGTCTGAGGTAAAAGCCC  
GTGGCTCAACACCGTAAGCCTTTGAAACTGTCTGGTGGAGTGCAGGAGAGGACAGTGAAGTCCATGTGTAGCGGTGA  
AATGCGTAGAGATGGGAGGAACACCAGTGGCGAAGGCGGCTGCTGGGCTTAACTGATGCTGAGGCACGAAAGCGTG  
GTAGC

>ASV:5780:Genus:Fusobacterium

AACGTAGGTCAACAGCGTTATCCGGATTTATTGGGCGTAAAGCGCGTCTAGGTGGTTATGTAAGTCTGATGTGAAAATGC  
AGGGCTCAACTCTGTATTGCGTTGAAACTGCATGACTAGAGTACTGGAGAGGTAAGCGGAATACAAGTGTAGAGGTGA  
AATTCGTAGATATTTGTAGGAATGCCGATGGGGAAGCCAGCTTACTGGACAGATACTGACGCTAAAGCGCGAAAGCGTG  
GTAGC

>ASV:5781:Phylum:Firmicutes

TACGTATGGTGCAAGCGTTATCCGGATTTACTGGGTGTAAGGGGAGCGCAGGCGGATGCGGCAAGTCTGATGTGAAAAGCCC  
GGGGCTCAACCCCGTACTGCATTGAAACTGGTGTACTAGAGTGCAGGAGAGGGCGATGGAATTCATGTGTAGCGGTGA  
AATGCGTAGATATATTAGGAGGAACACCAGTGGCGAAGGCGGCTGCCTGGCCTGTAACGACTGAGGCACGAAAGCGTG  
GGTAG

>ASV:5782:Kingdom:Bacteria

TACGTAGGGAGCAAGCGTTATCCGGATTTACTGGGTGTAAGGGGCGCGCAGGCGGGCCGCAAGTTGGAAGTGAATCTA  
TGGGCTTAACCCATAAACTGCTTTCAAACCTGCTGGTCTTGAAGTACCAGGAGAGGGTGCAGGGAATTCAGGTGTAGGAGTG  
AATCCGTAGATATCTGAGGAACACCAGTGGCGAAGGCGGCCACCTGGACGGTAACTGACGCTGAGGTGCGAAAGCGTG  
GGTAG

>ASV:5783:Family:Lachnospiraceae

TACGTATGGTGCAAGCGTTATCCGGATTTACTGGGTGTAAGGGGAGCGCAGGCGGTTGCGGCAAGTCTGATGTGAAAAGGCG  
GGGGCTCAACCCCTGACTGCATTGAAACTGTTAGTCTTGAAGTACCAGGAGAGGGTGCAGGGAATTCCTAGTGTAGCGGTG  
AATGCGTAGATATTAGGAGGAACACCAGTGGCGAAGGCGGCTTCTGGACTGTGCTGACGCTGAGATGCGAAAGCCAG  
GGTAG

>ASV:5784:Class:Bacilli

TACAGAGGTCTCAAGCGTTGTTGGAATCACTGGGCGTAAAGCGTGCCTAGGCGGTTTCTGAAGTCTGATGTGAAAAGCCT

TCGGCTCAACCGGAGAATTGCATCAGAACTGTTGAACTTGAAGTGCAGAAGAGGAGAGTGGAACTCCATGTGTAGCGGTG  
GAATGCGTAGAGATTAGGAAGAACCACCGTGGCGAAGGCGACTTTCTGGACGAAAACGACGCTGAGGCGCAAAGCGTG  
GGGAG  
>ASV:5785:Genus:Bacteroides  
TACGGAGGATCCGAGCGTTATCCGGATTTATTGGGTTTAAAGGGAGCGTAGGTGGATTGTTAAGTCAGTTGTGAAAGTTT  
GCGGCTCAACCGTAAAATTGCAGTTGAAACTGGGAAGCTGGAGTATCGGAGAGGAAAGTGGAAATTCCTAGTGTAGCGGTG  
AAATGCGTAGAGATTAGGAAGAACCCCGATTGCGAAGGCGACTACTGGACTGCAACTGACACTGATGCTCGAAAGTGTG  
GGTAT  
>ASV:5786:Family:Ruminococcaceae  
TACGTATGGTGAAGCGTTATCCGGATTTACTGGGTGTAAGGGAGCGCAGGCGGAGAAGCAAGTCAGTGGTAAAACGA  
TGGGCTTAACTCATCGACTGCCATTGAAACTGTTCCCTTGAAGTGAAGTAGAGGCGAGCGGAATTCAGTGTAGCGGTG  
AAATGCGTAGATATTCGGAGGAACACCAGTGGCGAAGGCGGCTGCTGGGCTTAACTGACGCTGAGGCTCGAAAGTGTG  
GGGAG  
>ASV:5787:Genus:UC5-1-2E3  
TACGGAGGGTGCAGCGTTAATCGGAATTACTGGGCGTAAAGCGCGCTAGGTTGTTTTGTAAGTCTGAAGTAAAATCCC  
CGGGCTCAACCCGGGAAGTGCCTTGGAAACTGTTGGGCTAGAGTGTGGAGAGGCAAGCGGAATTCCTAGTGTAGCGGTG  
AAATGCGTAGATATTAGGAGGAACACCAGTGGCGAAGGCGGCTGCTGGACGTAAGTGAAGTGTAGGCTCGAAAGCGTG  
GGGAG  
>ASV:5788:Family:Lachnospiraceae  
TACGTAGGTCCCGAGCGTTATCCGGATTTATTGGGTTTAAAGGGAGCGTAGACGGAAGTGAAGTCTGAAGTAAAACCC  
GGGGCTCAACCCCGTACTGCTTTGGAAACTGTGCTTCTAGAGTGTGGAGAGGTAAGCGGAATTCCTAGTGTAGCGGTG  
AAATGCGTAGATATTAGGAGGAACACCAGTGGCGAAGGCGGATAACTGGACGCAACTGACGCTGAGGCGCAAAGCGTG  
GGGAG  
>ASV:5789:Genus:Clostridium\_sensu\_stricto\_4  
TACGTAGGGAGCGAGCGTTGTCCGGAATTACTGGGCGTAAAGGGAGCGTAGGCGGACTTTAAGTGAGATGTGAAATACC  
CGGGCTCAACTTGGGTGCTGCATTTCAAAGTCTAGAGTGCAGGAGAGGAGAATGGAATTCCTAGTGTAGCGGTG  
AAATGCTTAGATATCACGAAGAACCAGTGGCGAAGGCGGCTGCTAAGCTGCAACTGACATTGAGGCTCGAAAGTGTG  
GGTAT  
>ASV:5790:Genus:Holdemania  
AACGTAGGTCAACAGCGTTGTCCGGAATTACTGGGTGTAAGGGTGCAGGCGGTTTGTAAAGTTAAGGTAAAACCGT  
GGGGCTTAAACCCATATAGCCTTAGAAACTGACAGACTAGAGTACAGGAGAGGGCAATGGAATTCACAGTGTAGCAGTGA  
AATGCGTAGATATGTGAAGAACCAGTGGCGAAGGCGGCTCCTGGGACATAACTGACGCTCAGGACGAAAAGCGTGG  
GGAGC  
>ASV:5791:Order:Clostridiales  
AACGTAGGGTCAACAGCGTTGTCCGGAATTACTGGGTGTAAGGGAGCGCAGGCGGGAAGACAAGTTGGAAGTAAAACCA  
TGGGCTCAACCCGGGACTGCATTGGAAGTGTAGGACTAGAGTGTGGAGGGGTAAGTGGAAATTCCTAGTGTAGCGGTG  
AAATGCGTAGATATTAGGAGGAACACCAGTGGCGAAGGCGGCTACTGGGACCAACTGACGCTGAGGCTCGAAAGTGTG  
GGTAG  
>ASV:5792:Family:Lachnospiraceae  
TACGTAGGGGCAACAGCGTTATCCGGATTTACGGGTTGTAAGGGAGCGTAGACGGTAAAGCAAGTCTGTAGTAAAACCC  
GCGGCTCAACTGCGGACTGCTTTGGAAACTGTTAACTGGAGTGTGGAGAGGTAAGTGGAAATTCCTAGTGTAGCGGTG  
AAATGCGTAGATATCGAGAGGAACACTCGTGGCGAAGGCGGTTCTGGACATTAAGTGAAGTGTAGGCTGAGGACGAAAGCCAG  
GGGAG  
>ASV:5793:Family:Lachnospiraceae  
TACGTATGGGCAACAGCGTTATCCGGATTTACTGGGTGTAAGGGAGCGTAGGCGGTAAGACAGGTGAGAAGTAAAACCC  
GGGGCTCAACCCGGGACTGCATTGGAAGTGTCAATCTGGAGTGTGGAGAGGCAAGTGGAAATTCCTAGTGTAGCGGTG  
AAATGCGTAGATATTAGGAGGAACACCAGTGGCGAAGGCGGCTACTGGACGATAACTGACGCTGAGGCGCAAAGCGTG  
GGGAG  
>ASV:5794:Family:Ruminococcaceae  
TACGTAGGTGGCAACAGCGTTATCCGGATTTACTGGGTGTAAGGGCGGTAGGCGGGATTGCAAGTCAGATGTGAAAACCTG  
GAGGCTCAACCTCCAGCCTGCATTTGAAACTGTAGTCTTGGAGTACTGGAGAGGCGAGCGGAATTCCTAGTGTAGCGGTG  
AAATGCGTAGATATCGGAGGAACCCGATTGCGAAGGCGACTACTGGAGCGCAACTGACGCTGAAGCTCGAAAGTGTGCG  
GGTAT  
>ASV:5795:Family:Ruminococcaceae  
TACGGAGGATCCGAGCGTTATCCGGATTTATTGGGTTTAAAGGGAGCGTAGATGGATGTTAAGTCAGATGTGAAATGTA  
GACGCTCAACCGGTAACGGCGCTTGAAGTGCAGGTCTTGAAGTGAAGTAGAGGTTGGCGGAATTCCTAGTGTAGCGGTG  
AAATGCGTAGATATTAGGAGGAACACCAGTGGCGAAGGCGGCAACTGGGTTTTACTGACGCTGAGGCTCGAAAGTGTG  
GTATC  
>ASV:5796:Order:Bacteroidales  
TACGGAGGATCCGAGCGTTATCCGGATTTATTGGGTTTAAAGGGAGCGTAGGTGGATTGTTAAGTCAGTTGTGAAAGTTT  
GCGGCTCAACCGTAAAATTTGCAGTTGAAACTGGCAGTCTTGAAGTACAGTAGAGGTTGGCGGAATAAGTTAAGTAGCGGTG  
AAATGCATAGATATAAAGTGAAGTCCGATAGCGAAGGCGGCTTACCAGACTGTAAGTGAAGTGTAGGCTGATGACAGGCGT  
GGTAG  
>ASV:5797:Phylum:Firmicutes  
TACGGAAAGTCCAGGCGTTATCCGGATTTATTGGGTTTAAAGGGAGCGCAGGCGGACTTTAAGTCAGCTGTGAAATACG  
GCGGCTCAACCGTCAAGTGCAGTTGAAACTGTAGGCTTGAAGTACCGAGAGGTTATCGGAATTCCTTGTGTAGCGGTG  
AAATGCGTAGATATAAGGAAGAACCAGTGGCGAAGGCGGATTGCTGGACGCAACTGACGCTGAGGCGCAAAGCGTG  
GGGAG

>ASV:5798:Family:Ruminococcaceae  
TACGGAAGGTCCGGGCGTTATCCGGATTTATTGGGTTAAAGGGAGCGTAGGCGGGCCGGCAAGTTGGGAGTGAAATCCC  
GGGGCTTAACCCCGAACTGCTTTCAAACCTGCTGGTCTTGAGTGATGGAGAGGCAGCCGGAATTCCTGTGTAGCGGTG  
AAATGCGTAGATATTAGGAGGAACACCAGTGGCGAAGGCGGCTTTCTGGACGACAAC TGACGGTGAGGCGCAAAGCGTG  
GGGAG

>ASV:5799:Genus:Pseudoflavonifractor  
TACGGAGGATTAACGCGTTATCCGGATTTATTGGGTTAAAGGGAGCGTAGGTGGACAGTTAAGTCAGTTGTGAAAGTTT  
GCGGCTCAACCCATGAACCTGCATTGAACTGTAGATCTTGAGTGCTGGAGAGGCAATCGGAATTCCTGTGTAGCGGTG  
AAATGCGTAGATATACGGAGGAACACCAGTGGCGAAGGCGGATTGCTGGACAGTAACTGACGCTGAGGCGCAAAGCGTG  
GGGAG

>ASV:5800:Genus:Bacteroides  
TACGGAGGATCCGAGCGTTATCCGGATTTATTGGGTTAAAGGGAGCGTAGATGGATGTTAAGTCAGTTGTGAAAGCCC  
GGGGCTCAACCCCGGACTGCATTGAACTGTACACTTGGAGTGCAGGAGGGTAAGCGGAATTCCTAGTGTAGCGGTG  
AAATGCTTAGATATCAGGAAGAACTCCGATTGCGAAGGCAGCTTACTGGATTGTAAC TGACGCTGATGCTCGAAAGTGTG  
GGTAT

>ASV:5801:Genus:Family\_XIII\_AD3011\_group  
TACGTAGGTGGCAAGCGTTATCCGGAATTTATTGGGCGTAAAGAGTACGTAGGTGGTTTTCTAAGCACGGGGTTAAGGCA  
ATGGCTTAACCCATGAACTGCATTGAACTGTAGACTGGAGTCTTGAGTGACACAGGGACTGGAATTCATGGTGTAGCGGTG  
AATGCTTAGATATCAGGAAGAACTCCGATTGCGAAGGCAGCTCACTAGACTGTTACTGACACTGATGCTCGAAAGTGTGG  
GTATC

>ASV:5802:Genus:Alloprevotella  
TACGGAAGGTGGCAAGCGTTGTCGGGATTTACTGGGTGTAAGGGCGTGCAGCCGGGTCTGCAAGTCAGATGTGAAATCC  
ATGGGCTCAACCCAGCTGCATTGAACTGTAGACTGGAGTCTTGAGTGACACAGGGACTGGAATTCATGGTGTAGCGGTG  
GAAATGCTCAGATATCATGAAGAACTCCAATCGGAAGGCAGGTATCCGGGGTGAAC TGACGCTGAGGCTCGAAAGTGC  
GGTA

>ASV:5803:Family:Lachnospiraceae  
TACGGAGGTGCAAGCGTTATCCGGATTTACTGGGTGTAAGGGCGTGTAGGCGGGATCGCAAGTCAGATGTGAAGACTG  
GAGGCTCAACCCAGCTGCATTGAACTGTGCTGCTGGAGTGTGGAGAGGTAAGCGGAATTCCTAGTGTAGCGGTG  
AAATGCGTAGATATTAGGAGGAACACCAGTGGCGAAGGCGCTTACTGGACGATGACTGACGCTGAGGCTCGAAAGCGTG  
GGGAG

>ASV:5804:Genus:UC5-1-2E3  
TACGGAGGATCCGAGCGTTATCCGGATTTATTGGGTTAAAGGGAGCGTAGACGGCTGTGCAAGTCAGTGTGAAAGCCC  
GGGGCTCAACCCCGGACTGCTTTGAAACTGTACGGCTGGAGTGTGGAGAGGCAAGCGGAATTCCTAGTGTAGCGGTG  
AAATGCGTAGATATTAGGAGGAACATCAGTGGCGAAGGCGCTTTCTGGACTGTGCTGACGCTGAGATGCGAAAGCGTG  
GGGAG

>ASV:5805:Family:Ruminococcaceae  
TACGTAGGTGGCAAGCGTTATCCGGATTTACTGGGTGTAAGGGCGTGTAGGCGGGACTGCAAGTCAGATGTGAAAAC TA  
TGGGCTCAACCCATAGCCTGCATTGAACTGTGGAGCTGGAGTGCAGGAGAGGCAAGTGGAATTCCTAGTGTAGCGGTG  
AAATGCGTAGATATTAGGAGGAACACCAGTGGCGAAGGCGCTTTCTGGACGACAAC TGACGCTGAGGCGCAAAGTGTG  
GGGAG

>ASV:5806:Family:Lachnospiraceae  
TACGTATGGTGCAAGCGTTATCCGGATTTACTGGGTGTAAGGGAGCGTAGACGGAGTGGAAGTCAGTGTGAAAACCC  
AGGGCTTAACCTGCGACTGCTTTGAACTGTGAGACTGGAGTGCAGGAGAGGTAAGCGGAATTCCTAGTGTAGCGGTG  
AAATGCGTAGATATTAGGAAGAACACCAGTGGCGAAGGCGACTTTCTGGACGAAAAC TGACGCTGAGGCGCAAAGCCAG  
GGGAG

>ASV:5807:Genus:Cloacibacterium  
TACGGAGGTGCAAGCGTTATCCGGATTTATTGGGTTAAAGGGTCCGTAGGCGGACTTATAAGTCAGTGGTAAAAGCCT  
GTCGCTTAACGATAGAAGTGCATTGATACTGTAAGTCTTGAGTATATTTGAGGTAGCTGGAATAAGTAGTGTAGCGGTG  
AAATGCGTAGATATTAGGAGGAACACCAGTGGCGAAGGCGCTTTCTGGGCTGACACTGACGCTGAGGCGCAAAGCGTG  
GGGAG

>ASV:5808:Family:Lachnospiraceae  
TACGTAGGGGCAAGCGTTATCCGGATTTACTGGGTGTAAGGGAGCGTAGACGGTAGACCAAGTCGAAAGTAAAAGCCC  
GGGGCTCAACCCGGTACTGCATTGAACTGTGCTACTAGAGTGTGGAGGGGTAAGTGGAATTCGTCGTGTAGCGGTG  
AAATGCTTAGATATGACGAAGAACTCCGATTGCGAAGGCAGCTGCTGTAGCTAAGTGAAGCTGAAAGTGC  
GGTAT

>ASV:5809:Kingdom:Bacteria  
AACGTAGGTCAACAGCGTTGTCGGGAATTTACTGGGTGTAAGGGTGCAGTGGGAAATTTAAGTTAGTTGTGAAAGCCC  
TCGGCTTAACCTAGGAACTGCAACTAAAACCTGGATTTCTTGAGTGTGGAGAGGAAAGCGGAATTCCTAGTGTAGCGGTG  
AAATGCTTAGATATGACGAAGAACTCCGATTGCGAAGGCAGCTGCTGTAGCTAAGTGAAGCTGAAAGCGTG  
GGTAT

>ASV:5810:Genus:Parabacteroides  
TACGGAGGATGCGAGCGTTATCCGGATTTATTGGGTTAGAGGGTGCAGTGGTGGTAAAGTCAGCGGTGAAAGTTT  
GTGGCTCAACCATAAAATTGCCGTTGAACTGGGTTACTTGAGTGTGTTTGGAGTAGGCGGAATGCGTGGTGTAGCGGTG  
AAATGCATAGATATCACTTGAACCCGATAGCGAAGGCAGCTTCCAGGCTCGGCTGACGCTGATGCGCGAGAGCGTG  
GGGAG

>ASV:5811:Family:Lachnospiraceae  
TACGTAGGGGCGAGCGTTGTCGGGAATTTACTGGGTGTAAGGGAGCGTAGACGGAAATGGAAGTCAGTGTGAAAGCCC  
GGGGCTCAACCCCGGACTGCATTGAACTGTCAATCTAGAGTACCGGAGGGGTAAGTGGAATTCCTAGTGTAGCGGTG

AAATGCTTAGATATCACGAAGAACTCCGATTGCGAAGGCAGCTCACTGGAGCGCAACTGACGCTGAAGCTCGAAAGTGCG  
GGTAT  
>ASV:5812:Family:Ruminococcaceae  
TACGTAGGTGGCAAGCGTTGTCCGGAATTACTGGGTGTAAGGGCGTGTAGGCGGGACTTTAAGTCAGATGTGAAATACC  
CGGGCTTAACCGGGAGGTGCATTTGAAACTGAGGTTCTTGAGTGCAGGAGAGGAAAGCGGAATTCCTAGTGTAGCGGTG  
AAATGCGTAGATATTAGGAGGAACACCAGTGGCGAAGGCGGCTTTCTGGGCTGACACTGACGCTGAGGCTCGAAAGCGTG  
GGGAG  
>ASV:5813:Order:Bacteroidales  
TACGTAGGTGGCAAGCGTTGTCCGGAATTACTGGGTGTAAGGGAGCGTAGGTGGATTGTTAAGTCAGTTGTGAAAGTTT  
GCGGCTCAACCGTAAAATTGCAGTTGAAACTGGCAGTCTTGAGTACAGTAGAGGTGGCGGAATTCGTCGTGTAGCGGTG  
AAATGCTTAGATATGACGAAGAACTCCGATTGCGAAGGCAGCCTGCTGTAGCGTAACGACGCTGAAGCTCGAAAGCGTG  
GGTAT  
>ASV:5814:Genus:Ruminococcaceae\_UCG-014  
TACGTAGGGAGCAAGCGTTATCCGATTATTTGGGTGTAAGGGTGCGTAGACGGGAATTTAAGTTAGTTGTGAAAGCCC  
TCGGCTTAACGAGGAACTGCAACTAAAAGTCTGACTTGGAGTATCGGAGAGGTAAGTGAATTCCTAGTGTAGCGGTG  
AAATGCGTAGATATTAGGAGGAACACCAGTGGCGAAGGCGGCTTACTGGACGATAACTGACGCTGAGGTTTCAAAGCGTG  
GGGAG  
>ASV:5815:Family:Ruminococcaceae  
TACGTAGGTGGCAAGCGTTGTCCGATTACTGGGTGTAAGGGAGCGCAGGCGGGATAGCAAGTCAGCGGTGAAATGCA  
TGGGCTTAACCATGAGCTGCCGTTGAAACTGTTTTCTTGAGTAGTGCAGAGGTAGCGGAATTCGCGGTGTAGCGGTG  
GAATGCGTAGATATCGGGAGGAACACCAGTGGCGAAGGCGGCTACTGGGCACCAACTGACGCTGAGGCGCGAAAGCGTG  
GGGAG  
>ASV:5816:Family:Ruminococcaceae  
TACGTAGGTGGCAAGCGTTGTCCGATTACTGGGTGTAAGGGAGCGCAGGCGGGGATCGAGTTGGAAGTAAATCCA  
TGGGCTCAACCCATAAACTGCTTCTAAAAGTGTATCCCTTGAGTATCGGAGAGGCAAGCGGAATTCCTAGTGTAGCGGTG  
AAATGCGTAGATATTAGGAGGAACACCAGTGGCGAAGGCGGCTACTGGGCACCAACTGACGCTGAGGCTCGAAAGCATG  
GGTAG  
>ASV:5817:Family:Ruminococcaceae  
TACGTAGGTGGCAAGCGTTGTCCGATTACTGGGTGTAAGGGCGTGTAGCCGGGAAGGCAGGTCAGATGTGAAATCCA  
CGGGCTCAACTCGTGAAGTGCATTTGAAACTGTTTTCTTGAGTATCGGAGAGGCAATCGGAATTCCTTGTTAGCGGTG  
AAATGCGTAGATATCGGGAGGAACACCAGTGGCGAAGGCGGCTACTGGGCACCAACTGACGCTGAGGCTCGAAAGTGTG  
GGTAT  
>ASV:5818:Family:Lachnospiraceae  
TACGGAGGATCCGAGCGTTATCCGATTACTGGGTGTAAGGGAGCGTAGACGGATGGACAAGTCTGATGTGAAAGGCT  
GGGGCTCAACCCCGGACTGCATTGAAACTGTCGACTAGAGTGTCCGAGGGTAAGCGGAATGTATGGTGTAGCGGTG  
AAATGCGTAGATATACAGAACACCAGTGGCGAAGGCGGCTACTGGACTGTAACGACGCTGATGCTCGAAAGTGTG  
GGTAT  
>ASV:5819:Family:Lachnospiraceae  
TACGTATGGTGAAGCGTTATCCGATTACTGGGTGTAAGGGAGCGTAGACGGTGTGGCAAGTCTGATGTGAAAGGCA  
TGGGCTCAACCGTAAAATTGCAGTTGATACTGGGCGCCTTGAGTGCAGCATAGGTAGCGGAATTCCTAGTGTAGCGGTG  
AAATGCGTAGATATTAGGAGGAACACCAGTGGCGAAGGCGGCTACTGGACTGTAACGACGCTGATGCTCGAAAGTGTG  
GGTAT  
>ASV:5820:Order:Clostridiales  
TACGTAGGGGGCAAGCGTTATCCGGAATTACTGGGTGTAAGGGTGCGTAGGTGGCAGTCAAGTCAGACGTGAAAGGCC  
GGGGCTCAACCCCGGAGCTGCATTTGAAACTGCCGCTTGAGTGCAGGAGGTAAGCGGAATTCCTAGTGTAGCGGTG  
AAATGCGTAGATATTAGGAGGAACACCAGTGGCGAAGGCGGATTGCTGGACAGCAACTGACGCTGAGGCGCGAAAGTGTG  
GGGAG  
>ASV:5821:Family:Ruminococcaceae  
TACGTAGGTGGCAAGCGTTATCCGATTACTGGGTGTAAGGGCGTGTAGGCGGGATCGCAAGTCAGATGTGAAAAGTGC  
GAGGCTCAACCTCCAGCTGCATTTGAAACTGTGTTCTTGAGTGAAGTAGAGGTAAGCGGAATTCCTAGTGTAGCGGTG  
AAATGCGTAGATATTAGGAGGAACATCAGTGGCGAAGGCGGCTTACTGGCTTTAACTGACGCTGAGGCTCGAAAGCGTG  
GGGAG  
>ASV:5822:Family:Lachnospiraceae  
TACGTAGGGGGCAAGCGTTATCCGATTACTGGGTGTAAGGGAGCGTAGACGGCTTGATAAGTCTGAAGTGAAGGGCC  
AAGGCTTAACCATGGAAGTGTGTTGAAACTATGAGGCTAGAGTGTGGAGAGGTAAGCGGAATTCCTAGTGTAGCGGTG  
AAATGCGTAGATATTAGGAGGAACACCAGTGGCGAAGGCGGCTTACTGGACAGAAACTGACGCTTGAAGGCTCGAAAGCGTG  
GGGAG  
>ASV:5823:Family:Clostridiales\_vadinBB60\_group  
TACGTAGGGAGCAAGCGTTGTCCGGAATTACTGGGCGTAAAGGGTGCGTAGGCGGTTATACAAGTTAGAAGTAAATACC  
CAGGGCTTAACCGGGTGTGCTTCTAAAAGTGTAAAGTGTAGTGCAGTAGAGGTTAGTGAATTCCTAGTGTAGCGGTG  
GGAATGCGTAGATATTAGGAGGAACACCAGAGGCGAAGGCGGCTAAGTGGACTGCAACTGACGCTGAGGCGACGAAAGTGT  
GGGGA  
>ASV:5824:Genus:Actinomyces  
AACGTAGGGTGGCAAGCGTTGTCCGGAATTACTGGGCGTAAAGGGCTTGTAGGCGGTTTGTCCGCTGCTGCCGTGAAATCCT  
CTGGCTTAACGGGGCGTGCAGTGGGTACGGGCAGACTTGAAGTGCAGTAGAGGTTAGTGAATTCCTAGTGTAGCGGTG  
GAATGCGCAGATATCAGGAAGAACACCAGTGGCGAAGGCGGCTTCTGGGCCGTTACTGACGCTGAGGAGCGAAAGCGTG  
GGGAG  
>ASV:5825:Genus:Erysipelatoclostridium

TACGTAGGTGGCGAGCGTTATCCGGAATTATTGGGCGTAAAGAGGGAGCAGGCGGGCGCAGAGGTCTGTGGTAAAAGACT  
GAAGCTTAACTTCAGTAAGCCATAGAAAACCGGGCTGCTAGAGTGCAGGAGAGGTAAGTGGAATTCCTGGTGTAGCGGTGA  
AATGCGTAGATATCAGGAAGAACACCCGGAGGCGAAGGCGGCTTACTGGACAATAACTGACGTTGAGGCTCGAAAAGCGTGG  
GGATC

>ASV:5826:Family:Lachnospiraceae

TACGGAGGATCCGAGCGTTATCCGGATTTATTGGGTTTAAAGGGAGCGTAGATGGATGTTTAAAGTCAAGTGTGAAAAGTTT  
GCGGCTCAACCCCGGTACTGCATTGAAAAGTGTCTGACTAGAGTGTGCGGAGGGTAAGCGGAATTCCTAGTGTAGCGGTG  
AATGCGTAGATATTAGGAGGAACACCAGTGGCGAAGGCGGCTTACTGGACGATAACTGACGCTGAGGCACGAAAAGCGTG  
GGGAG

>ASV:5827:Family:Ruminococcaceae

TACGTAGGGGGCAAGCGTTATCCGGATTTACTGGGTGTAAAGGGCGCGTAGGCGGGAATGCAAGTCAAGTGTGAAATCCA  
AGGGCTCAACCCCTTGAAGTGTCTTCAAAGTGTCTTCTTGGAGTGTGACAGAGGTAGGCGGAATTCCTGGTGTAGCGGTG  
GAATGCGTAGATATCGGGAGGAACACCAGTGGCGAAGGCGGCTTCTGGACTGTAACGACGCTGAGGTACGAAAAGCGTG  
GGGAG

>ASV:5828:Family:Peptostreptococcaceae

TACGTAGGGGGCTAGCGTTATCCGGAATTACTGGGCGTAAAGGGTGCCTAGGTGGTTTCTTAAAGTCAAGAGGTGAAAAGCT  
ACGGCTCAACCGTAGTAAGCCTTTGAAAGTGGGTTTCTTGGAGTGTATTTGAAGTAGGCGGAATTCCTAGTGTAGCGGTGA  
AATGCGTAGATATTAGGAGGAACACCAGTGGCGAAGGCGGCTTCTGGACGATGACTGACGTTGAGGCTCGAAAAGCGTGG  
GGAGC

>ASV:5829:Family:Bifidobacteriaceae

TACGTAGGGGGCAAGCGTTATCCGGATTTACTGGGTGTAAAGGGAGCGTAGACGTTTGATAAGTCTGAAGTTAAAGGCT  
GTGGCTCAACCATAGTTCGCTTTGAAAGTGTCAAAGTGTGAGTGCAGAAGGGGAGAGTGAATTCATGTGTAAACGGTGG  
AATGCGTAGATATCGGGAGGAACACCAATGGCGAAGGCGGCTTCTGGCCGTTACTGACGCTGAGGAGCGAAAAGCGTGG  
GGAGC

>ASV:5830:Family:Lachnospiraceae

TACGTAGGGGGCAAGCGTTATCCGGATTTACTGGGTGTAAAGCGCGTCTAGGCGGTTTGGTAAAGTCTGATGTGAAAATGC  
GGGGCTCAACTCTGTATTGCGTTGAAAGTGTCTGCTAGAGTGTGCGAGAGGTAAGTGGAATTCCTAGTGTAGCGGTGA  
AATGCGTAGATATTAGGAGGAACACCAGTGGCGAAGGCGGCTTACTGGACGATGACTGACGTTGAGGCTCGAAAAGCGTGG  
GGAGC

>ASV:5831:Family:Ruminococcaceae

AACGTAGGTCACAAGCGTTGTCCGGAATTACTGGGTGTAAAGGGAGCGCAGGCGGGCGATCAAGTTGGAAGTGAATCCA  
TGGGCTCAACCCGTGAATTGCTTTCAAAGTGTGCTGCTTGGAGTGTGACAGAGGTAGGCGGAATTCCTGGTGTAGCGGTG  
GAATGCGTAGATATCGGGAGGAACATCAGTGGCGAAGGCGGCTTACTGGACGATGACTGACGTTGAGGCTCGAAAAGCGTG  
GGTAT

>ASV:5832:Family:Lachnospiraceae

TACGGAGGATCAAGCGTTATCCGGATTTATTGGGTTTAAAGGGTGCCTAGGCGGTTTGGCAAGTCTGATGTGAAAAGCT  
GGGGCTCAACCCCGGACTGCTTTGAAAGTGTCTTGGAGTGTGCGGAGAGGTAAGCGGAATTCCTAGTGTAGCGGTG  
AAATGCGTAGATATTAGGAGGAACACCAGTGGCGAAGGCGGCTTACTGGACGTAACGACTGACGTTGAGGCTCGAAAAGCGTG  
GGGAG

>ASV:5833:Order:Clostridiales

TACGGAGGATCAAGCGTTATCCGGATTTATTGGGTTTAAAGGGTGCCTAGGCGGTTTGGTAAAGTCAAGTGTGAAAATCCA  
TGGGCTTAAACCCATGAATGCATTTGAAAGTGTATTTCTTGGAGTGTGCGGAGAGGTAAGCGGAATTCCTAGTGTAGCGGTG  
AAATGCGTAGATATTAGGAGGAACATCAGTGGCGAAGGCGGCTTACTGGACTGAAAGTCAAGTGTGAAAAGCTG  
GGGAG

>ASV:5834:Class:Bacteroidia

TACGTATGGTGAAGCGTTATCCGGATTTATTGGGTTTAAAGGGTGCCTAGGCGGATTAGTAAAGTGTAGAGGTGAAAAGCTC  
GATGCTCAACATCGAAATGCATTTGAAAGTGTATTTCTTGGAGTGTGCGGAGAGGTAAGCGGAATTCCTAGTGTAGCGGTG  
AAACGCTTAGATATCACGAAGAAGTCCGATTGCGAAGGCGGCTTACTGGAGTGTAAAGTCAAGTGTGAAAAGTGTG  
GGTAT

>ASV:5835:Family:Lachnospiraceae

TACGTAGGGAGCGAGCGTTGTCCGGAATTACTGGGTGTAAAGGGAGCGTAGACGTTAGACCAAGTCTGAAGTGAAGGCC  
GGGGCTCAACCCCGGAACTGCTTTGAAAGTGTAAAGTGTGAGTGCAGGAGAGGTAAGTGGAATTCCTAGTGTAGCGGTG  
GAATGCGCAGATATTGGGAAGAACACCAGTGGCGAAGGCGGCTTCTGGCCATTACTGACGCTGAGGTGCGAAAAGCTAG  
GGGAG

>ASV:5836:Genus:Lachnoclostridium

TACGTAGGGGGCAAGCGTTATCCGGATTTACTGGGTGTAAAGGGAGCGTAGACGGCAAGGCAAGTCTGAAGTGAAGGCC  
GGTGCTTAAACCCGGGACTGCTTTGAAAGTGTAGAGCTAGAGTGTGCGGAGAGGCAAGCGGAATTCCTAGTGTAGCGGTG  
AAATGCGTAGATATACGGAGGAACACCAGTGGCGAAGGCGGCTTCTGGACGATGACTGACGTTGAGGCTCGAAAAGCGTG  
GGGAG

>ASV:5837:Kingdom:Bacteria

TACGGAGGATCAAGCGTTATCCGGATTTATTGGGTTTAAAGGGTGCCTAGGCGGTTTGGTAAAGTGTAGAGGTGAAAATCA  
GGGGCTCAACTCTGGAATGGCATATGTGACTGCTCGACTAGAGTGTGTGAGAGGAGGTAAGTGGAATTCACGTTAGCAGTGT  
AAATGCGTAGATATGTGGTAGAACACCAGTGGCGAAGGCGGCTTCTGGACTGTAACGACGCTGATGCTCGAAAAGTGTG  
GGTAT

>ASV:5838:Species:kroppenstedtii

TACGTAGGGTGCAGCGTTGTCCGGAATTACTGGGCGTAAAGAGCTCGTAGGTGGTCTGTCCGCTCATTGTGAAAAGGCC  
GGGGCTTAACTCCGGTTGGCAGGTGATACGGGCATGACTGGAGTACTGTAGGGGAGACTGGAATTCCTGGTGTAGCGGT  
GAAATGCGCAGATATCAGGAGGAACACCAGTGGCGAAGGCGGCTTCTGGGCGTAAAGTCAAGTGTGAAAAGGAT

GGGTA  
>ASV:5839:Family:Ruminococcaceae  
TACGTAGGGAGCGAGCGTTGTCCGGATTTACTGGGTGTAAGGGTGCCTAGGCGGACTGGCAAGTCAGTGGTAAAACTA  
TGGGCTTAACCCATAGACTGCCATTGAAACTGTTGGTCTTGAAGTAGAGGTAGCGGGAATTCCTAGTGTAGCGGTG  
AAATGCGTAGAGATCGGGAGGAACACCAGTGGCGAAGGCGGCTTTCTGGACTGAAACTGACGCTGAGGCTCGAAAGCGTG  
GGGAG  
>ASV:5840:Genus:Ruminococcaceae\_UCG-005  
TACGTAGGTTGCAAGCGTTGTCCGGATTTACTGGGTGTAAGGGGCGGTAGGCGGAGATGCAAGTTGGGAGTAAAAACCA  
TGGGCTCAACCCATGAACTGCTCTCAAACTGTATCCCTTGAAGTATCGGAGAGGCAAGCGGGAATTCCTAGTGTAGCGGTG  
AAATGCGTAGATATAACTTAGAACTCCGATAGCGAAGGCAGCTTACCAGACTGTAAGTACGCTGATGCACGAGAGCGTG  
GGTAG  
>ASV:5841:Genus:Ruminococcaceae\_UCG-010  
TACGTAGGTGCGAGCGTTATCCGGATTTACTGGGTGTAAGGGGAGTGTAGGCGGGAAGTCAAGTCAGATGTGAAATGCC  
GCGGCTTAACCCGCGGACTGCTTTGAAACTGTAGGACTAGAGTGCAGGAGAGGTAAGTGGAAATTCATGTGTAGCGGTG  
AAATGCGTAGATATTAGAAGGAACACCAGTGGCGAAGGCGGCTTCTGGGCCGTTACTGACGCTGAGGCACGAAAGCGTG  
GGGAG  
>ASV:5842:Family:Lachnospiraceae  
TACGGAGGATCCGAGCGTTATCCGGATTTACTGGGTGTAAGGGAGCGTAGACGGTTTTGCAAGTCTGAAGTAAAAGCC  
GGGGCTTAACCCCGGACTGCTTTGAAACTGTAGGACTAGAGTGCAGGAGAGGTAAGTGGAAATTCATGTGTAGCGGTG  
GAATGCGTAGATATCGGGAGGAACACCAGTGGCGAAGGCGGCTACTGGGCACCAACTGACGCTGAGGCACGAAAGCATG  
GGTAG  
>ASV:5843:Order:Clostridiales  
TACGGAGGATCCGAGCGTTATCCGGATTTACTGGGTGTAAGGGTGCCTAGGCGGTTTTGATAAGTCAAGTGTGAAATACC  
GGGGCTCAACTCCGGGCTGCATTTGAAACTGTATATCTTGAAGTGTCCGGAGAGGAAAGCGGAAATTCCTAGTGTAGCGGTG  
AAATGCGTAGATATTAGGAGGAACACCAGTGGCGAAGGCGGCTTCTGGACTGTTACTGTCCTGAGGCACGAAAGCGTG  
GGGAG  
>ASV:5844:Order:Clostridiales  
AACGTAGGGTGCAGCGTTGTCCGGATTTACTGGGTGTAAGGGAGCGTAGACGGTGTGGCAAGTCTGATGTGAAAGGCA  
TGGGCTCAACCTGTGGACTGCATTGAAACTGCCCGTCTTGAAGTGCAGGAGAGGTAAGCGGAAATTCCTAGTGTAGCGGTG  
AAATGCGTAGAGATCGGTAGGAACACCAGTGGCGAAGGCGGCTTTCTGGACTGAAACTGACGCTGAGGCACGAAAGCGTG  
GGGAG  
>ASV:5845:Family:Lachnospiraceae  
TACGTATGGTGCAGCGTTATCCGGATTTACTGGGTGTAAGGGAGCGTAGACGGATAAGCAAGTCTGGAGTAAAAGCC  
GGGGCTCAACCCCGGACTGCTTCGAAACTGTCTACTTGAAGTGCAGGAGGGTAAGCGGAAATTCCTAGTGTAGCGGTG  
AAATGCGTAGATATTAGGAGGAACACCAGTGGCGAAGGCGGCTACTGGGCTTAACTGACGCTGAAGCACGAAAGCATG  
GGTAG  
>ASV:5846:Genus:Streptococcus  
TACGTAGGTCCCGAGCGTTGTCTGGATTTATTGGGCTGTAAGGGAGCGCAGGCGGTGAGGAAAGTCTGGAGTAAAAGGCT  
ATGGCTCAACCATAGTGTGCTCTGAAACTGTCTGACTTGAAGTGCAGAAAGGGAGAGTGGAAATTCATGTGTAGCGGTG  
AATGCGTAGATATATGGAGGAACACCAGTGGCGAAGGCGGCTTCTGTCTGTCACTGACGCTGAGGCTCGAAAGCGTG  
GTAGC  
>ASV:5847:Family:Ruminococcaceae  
TACGGAGGATGCGAGCGTTATCCGGATTTATTGGGTTAAAGGGAGCGTAGACGGTTTTTAAGTCAAGTGTGAAAGTTT  
GGGGCTCAACCCATAAATTGCTTTCAAACTGCTGGCCTTGAAGTGTGAGGAGGTAAGTGGAAATTCCTAGTGTAGCGGTG  
AAATGCGTAGATATCGGGAGGAACACCAGTGGCGAAGGCGACCTACTGGGCACCAACTGACGCTGAGGCTCGAAAGCATG  
GGTAG  
>ASV:5848:Order:Clostridiales  
AACGTAGGTCACAAGCGTTGGCCGGAATTTACTGGGTGTAAGGGAGCGCAGGCGGTGCGGCAAGTCAAGTGTGAAACCC  
GGGGCTCAACCCCGGACTGCATTTGAAACTGTCCGACTAGAGTGCAGGAGGTTAGTGGAAATTCCTAGTGTAGCGGTG  
AAATGCGTAGAGATTAGGAAGAACACCAGTGGCGAAGGCGACTTTCTGGACGACAACTGACGCTGAGGCACGAAAGCGTG  
GGGAG  
>ASV:5849:Kingdom:Bacteria  
TACGTAGGTCCCGAGCGTTGTCCGGATTTATTGGGTTAAAGGGTGCCTAGGTTGGTTTGTCAAGTTGGCAGCGTAATTCC  
GTGGCTCAACCCGCGGAACTACTGCCAAAAGTATAGGCTTGAAGTGCAGGAGGGTATGTGGAATTCCTAGTGTAGCGGTG  
GAATGCGTAGATATTAGGAGGAACACCAGTGGCGAAGGCGGACCTGGACGGTAAGTACGCTGAGGTCGAAAGCGTG  
GGTAG  
>ASV:5850:Genus:Coprobacter  
TACGGAGGATTCAGCGTTATCCGGATTTATTGGGTTAAAGGGTGCCTAGGCGGTTTTGATAAGTCAAGTGTGAAATGCT  
TCAGCTCAACTGGAGATTGCCGATGAAACTGTTTTCTAGAGTATAAAGAGGATGCGGAAATGCGTGGTGTAGCGGTG  
AAATGCTTAGATATCACACAGAACACCAGTGGCGAAGGCGACTTTCCAAGCTATTACTGACGCTGAGGCACGAAAGCGTG  
GGGAG  
>ASV:5851:Genus:Oscillibacter  
TACGTAGGTGCGAAGCGTTGTCCGGATTTACTGGGTGTAAGGGGCGTGCAGCCGGGCTGGCAAGTCAAGCGTGAATCCC  
AGGGCTCAACCTGGAAGTGCCTTTGAAACTGCTGGTCTTGAAGTACCAGGAGGTCATCGGAAATTCCTGTGTAGCGGTG  
AAATGCGTAGATATAAGGAAGAACCTCCGATTGCGAAGGCGACACTAAGCCGTAAGTACGCTTCAAGTGTGAAAGTGTG  
GGTAT  
>ASV:5852:Order:Bacteroidales  
TACGGAGGATCCGAGCGTTATCCGGATTTATTGGGTGTAAGAGTGCCTAGGTTTACCTAAGCAGGGGGTAAAAGGCA

CTGGCTTAACCAATGTGAGCCCTGAACTGGGTACCTTGAGTGCAACGGAGGTAGGCGGAATTCGTGGTGTAGCGGTGA  
AATGCTTAGATATCACGAAGAACTCCGATTGCGAAGGCAGCTTACTGGATTGTAAGTACGCTGATGCTCGAAAGTGTGG  
GTATC

>ASV:5853:Family:Ruminococcaceae

TACGGAGGATCCGAGCGTTATCCGGATTTATTGGGTTTAAAGGGCGCGTAGGCGGACTGTCAAGTCAGTCGTGAAATACC  
GGGGCTTAACCCGGGCTGCGATTGAAACTGACAGCCTTGAGTATCGGAGAGGAAAGCGGAATTCCTAGTGTAGCGGTG  
GAATGCGTAGATATCGGAGGAACACCAGTGGCGAAGGCGGCTACTGGGCACCAACTGACGCTGAGGCTCGAAAGTGTG  
GGTAG

>ASV:5854:Family:Peptostreptococcaceae

TACGTAGGGGCTAGCGTTATCCGGATTTACTGGGCGTAAAGGGTGCCTAGGCGGCTTTTTAAGTCAGGAGTAAAGGCT  
ACGGCTCAACCGTAGTAAGCTCTTGAAGTGGAGGACTTGAGTGCAGTAGAGGTGGGCGGAATTCCTAGTGTAGCGGTGA  
AATGCGTAGATATTAGGAGGAACACCAGTGGCGAAGGCGGCTTTCTGGACGACAACTGACGCTGAGGCGGAAAGCCAGG  
GGAGC

>ASV:5855:Family:Desulfovibrionaceae

TACGGAGGGTGCAGCGTTAATCGGAATTACTGGGCGTAAAGCGCACGTAGGCTGTATGTCAAGTCAGGGTGAATCCC  
ACGGCTCAACCGTGGAACTGCCTTTGAAACTGGCAAAGTGGAGTATGTGAGAGGGTGGCGGAATTCCTGGTGTAGGAGTG  
AAATCCGTAGATATCAGGAGGAACATCAGTGGCGAAGGCGGCGCTGGCACAAACTGACGCTGAGGTGCGAAAGCGTG  
GGTAG

>ASV:5856:Family:Ruminococcaceae

TACGTAGGTGGCAAGCGTTATCCGGAATTATTGGGTGTAAGGGAGCGTAGGCGGGATTGCAAGTTAAATGTGAAATCTA  
TCGGCTCAACCGTAGCTGCGTTTAAACTGTAGTCTTGAGTGAAGTAGAGGCAGGCGGAATTCCTAGTGTAGCGGTGA  
AATGCTTAGATATCACTCAGAACCCGATTGCGAAGGCATCTGGCGAATCCGTAAGTACGCTGAGGCGGAAAGCGGTG  
GGATA

>ASV:5857:Family:Lachnospiraceae

TACGTAGGGGCAAGCGTTATCCGGATTTACTGGGTGTAAGGGAGCGCAGGTGGCAAGGCAAGCCAGAAGTAAAACCC  
GGGGCTTAACCCGTGGATTGCTTTTGAAGTGTCTGGCTAGAGTGCAGGAGGGCAGGCGGAATTCCTAGTGTAGCGGTG  
GAAATGCTTAGATATCACGAAGAACTCCGATTGCGGAGGCAGCTGCTAAGTGCAACTGACATTGAGGCTCGAAAGTGTG  
GGGTA

>ASV:5858:Kingdom:Bacteria

TACGTAGGGAGCGAGCGTTGTCCGGAATTACTGGGTGTAAGGGAGCGTAGGCGGGATCGCAAGTCAGAAGTAAATCCA  
TGGGCTTAACCCATGAAGTGTCTTTGAAACTGTTAGTCTTGAGTGAAGTAGAGGTAGGCGGAATTCCTGGTGTAGCGGTG  
AAATGCGTAGATATCACGAAGAACTCCGATTGCGAAGGCAGCTCACGGGAGCGCAACTGACGCTGAAGCTCGAAAGCGTG  
GGGAG

>ASV:5859:Genus:Christensenellaceae\_R-7\_group

TACGTAGGTGGCGAGCGTTATCCGGATTTACTGGGCGTAAAGGGCGCGTAGGCGGCTCGGTAAGTCTGGAGTAAAAGTCC  
TGCTTTAAAGTGGGAATTGCTTTGGATACTGCGGGCTTGAGTGCAGGAGAGGAAAGTGGAAATTCCTAGTGTAGCGGTG  
AAATGCGTAGATATTAGGAGGAACACCAGTGGCGAAGGCGGCTTTGTTGGACGACAACGACGCTGAGGCTCGAAAGCGTG  
GGGAG

>ASV:5860:Genus:Ruminococcaceae\_UCG-010

TACGTAGGTGGCAAGCGTTATCCGGATTTACTGGGTGTAAGGGAGCGCAGGCGGCAGGCAAGTCAGATGTGAAATACT  
GGGGCTCAACCCATGACTTGCCTTTGAAACTGCGGTTCTTGAGAGTGGGAGAGGTAATGGAATTCCTGGTGTAGCGGTG  
AAATGCGTAGATATCAGGAGGAACACCAGTGGCGAAGGCGGCTTTACTGGGCTTAACTGACGCTGAGGCTCGAAAGCGTG  
GGGAG

>ASV:5861:Phylum:Firmicutes

TACGTATGTTCAAGCGTTATCCGGATTTATTGGGCGTAAAGCGAGCGCAGACGGTTATTTAAGTCTGATGTGAAAGGCT  
GGGGCTTAACCCAGGACTGCATTGGAAGTGTCTTTCTAGAGTGCAGGAGAGGTAAGCGGAATTCCTAGTGTAGCGGTG  
AAATGCGTAGATATTAGGAGGAACACCAGTGGCGAAGGCGGCTTTCTGGACGACAACGACGCTGAGGCGGAAAGCGTG  
GGGAG

>ASV:5862:Family:Erysipelotrichaceae

AACGTAGGTACAAGCGTTGTCCGGAATCATTGGGCGTAAAGGGTGCCTAGGTGGCGTACTAAGTCTGTAGTAAAAGGCA  
ATGGCTCAACCATTAAGCTATGGAAGTGGTATGCTGGAGTGCAGAAGAGGGCGATGGAATTCATGTGTAGCGGTAA  
AATGCTTAGATATCACGAAGAACTCCGATTGCGAAGGCAGCTTACTGGATTGTAAGTACGCTGATGCTCAAAGTGTGG  
GTATC

>ASV:5863:Order:Clostridiales

TACGTATGGTCAAGCGTTATCCGGATTTACTGGGTGTAAGGGAGCGTAGACGGAGTGGAAGTCTGATGTGAAAAGTCTG  
GAGGCTCAACCTCCAGCCTGCATTTGAAACTGTGGTCTTGAGTACTGGAGAGGCAGACGGAATTCCTAGTGTAGCGGTG  
AAATGCTTAGAGATATACAGAACACCAGTGGCGAAGGCGGCTTTACCAAATATATCTAACGTTGAGGCACGAAAGCGTG  
GGGAG

>ASV:5864:Family:Ruminococcaceae

TACGGAGGATTCGAGCGTTATCCGGATTTATTGGGTGTAAGGGCGTGCAGCCGGGCGGCAAGTCAGATGTGAAATCTG  
GAGGCTTAACCTCAAACTGCATTTGAAACTGTAGGCTTGAGTACCAGGAGGTTATCGGAATTCCTTGTGTAGCGGTG  
AAATGCGTAGATATTGGGAGGAACACCAGTGGCGAAGGCGGCTTTCTGGACTGTGCTGACGCTGAGATGCGAAAGCCAG  
GGTAG

>ASV:5865:Family:Lachnospiraceae

TACGGAGGATTCAGCGTTATCCGGATTTATTGGGTTTAAAGGGAGCGCAGGCGGTGCGGCAAGTCTGATGTGAAAACCC  
AGGGCTCAACCTGGGACTGCTTTGAAACTGTTTGGTCTAGAGTGTGCGAGAGGTAAGTGGAAATTCCTAGTGTAGCGGTG  
AAATGCGTAGATATTAGGAGGAACACCAGTGGCGAAGGCGGCTTTACTGGACGATAACTGACGTTGAGGCTCGAAAGCGTG  
GGGAG



>ASV:5866:Phylum:Firmicutes  
TACGTAGGTGGCAAGCGTTGTCCGGATTTACTGGGTGTAAAGGGAGCGCAGGCGGTGCGGCAAGTCTGATGTGAAAGCCC  
AGGGCTCAACCTGTGGACTGCATTGAAACTGTCATACTTGAGTGCCGGAGGGTAAGCGGAATTCCTAGTGTAGCGGTG  
AAATGCGTAGATATTAGGAGGAACACCAGTGCGAAAGCGGCTTTCTGGACGAAAACGACGCTGAGGCGCAAAGCCAG  
GGGAG

>ASV:5867:Kingdom:Bacteria  
TACGGAGGATCCAAGCGTTATCCGGATTTACTGGGTGTAAAGGGAGCGTAGACGGCGACGCAAGTCTGAAGTAAATACC  
CGGGCTCAACCTGGAACTGCTTTGAAACTGTGTTGCTAGTAATGGAGGGGAAACCGGAATTCCTGGTGTAGCGGTG  
AAATGCGTAGATATCACGAAGAAGCTCCGATTGCGAAGGCAGCTCACTGGACTGCAACTGACACTGATGCTCGAAAGTGTG  
GGTAT

>ASV:5868:Genus:Ruminococcaceae\_UCG-002  
TACGTAGGGGGCAAGCGTTATCCGGATTTACTGGGTGTAAAGGGTGCCTAGGCGGTTAATTAAGTTGGATGTGAAATCCA  
CGGGCTTAACCTCGTGAACCTGCATTTGAAACTACTTTTCTTGAGTATCGGAGAGGCAATCGGAATTCCTAGTGTAGCGGTG  
AAATGCGTAGATATTAGGAGGAACACCAGTGCGAAGGCAGCTTCTGGACGACAACTGACGGTGAGGCGCAAAGCGGTG  
GGGAG

>ASV:5869:Family:Lachnospiraceae  
TACGTAGGGGGCAAGCGTTATCCGGATTTACTGGGTGTAAAGGGTGCCTAGGTGGCAAGGCAAGTCAAGTGTGAAAGCCC  
GGGGCTTAACCTGGGCTGCATTTGAAACTGTGAACTGGAGTGCAGGAGAGGTAAGTGAATTCACGCTGTAGCAGTG  
AAATGCGTAGATATGTGGAAGAACACCAGTGCGAAGGCAGCCCTCTGGACATGACTGACGCTCATGCACGAAAGCATG  
GGGAT

>ASV:5870:Class:Bacteroidia  
TACGTATGGTGCAAGCGTTATCCGGATTTACTGGGTGTAAAGGGTGCCTAGGTGGTATGGTAAGTCAAGTGTGAAATACA  
CGGGCTTAACCTGGGCTGCATTTGATACTGGTCTTGAGTGCAGTAGAGGTAGCGGGAATTCGTGGTGTAGCGGTG  
AAATGCTTAGATATCACGAAGAAGCTCCGATTGCGAAGGCAGCTTACCAACTATATCTGACGTTGAGGCACGAAGCGGTG  
GGGAG

>ASV:5871:Class:Bacteroidia  
TACGGAGGATCCGAGCGTTATCCGGATTTACTGGGTGTAAAGGGAGCGTAGGCGGACGCTTAAGTCAAGTGTGAAAGTTT  
GCGGCTTAACCTAAAGTGCATTTGAAACTGTTTCTTGAGTGAAGTAGAGGTTGGCGGAATTCAGTGTAGCGGTG  
AAATGCGTAGATATTCGAGGAACACCAGTGCGAAGGCAGCTTAACTGACGCTGAGGCTCGAAAGTGTG  
GGGAG

>ASV:5872:Genus:Acidaminococcus  
TACGTAGGGGGCAAGCGTTATCCGGATTTACTGGGCGTAAAGGGCGCTAGGCGGATCGTTAAGTTGGACGTGAAAATGC  
GGGGCTTAACCCGATGGCGTTGGATACTGGAAAGTCTTGAGTGCAGGAGAGGAAAGGGGAATTCACGCTGTAGCGGTGA  
AATGCGTAGATATTGGGAGGAACACCAGTGCGAAGGCAGCTTACTGGACAGTAACTGACGCTGAGGCACGAAAGCGTGG  
GGAG

>ASV:5873:Genus:Merdibacter  
TACGTAGGTGGCGAGCGTTATCCGGAATGATTGGGCGTAAAGGGTGCCTAGGTGGCACGATAAGTCTGGAGTAAAGGGGA  
GCGGCTCAACCCGCTGTTGGCTCTGGAAGTGTGAGTGCAGGAGAGGCGATGGAATTCATGTGTAGCGGTAA  
AATGCGTAGATATCGGAGGAACACCAGTGCGAAGGCAGCTTACTGGGCTTAACTGACGCTGAGGCACGAAAGCGTGG  
GTAGC

>ASV:5874:Genus:Copro bacter  
TGCGTAGGGAGCGGGCTTGTCCGGAATTAAGGGTGTAAAGGGTGCCTAGGCGGAAGAATAAGTCAAGCGGTGAAATGCT  
TCAGCTCAACTGGAGAATTGCCGATGAAACTGTTTTCTAGAGTATAAAAGAGGTATGCGGAATGCGTGGTGTAGCGGTG  
AAATGCATAGATATCACGCAGAAGCTCAATTGCGAAGGCAGCTTACTAAACCATAACTGACACTGAAGCACGAAAGCGTGG  
GGTAT

>ASV:5875:Family:Lachnospiraceae  
TACGGAGGGTGCAGCGTTAATCGGAATAACTGGGCGTAAAGGGCACGAGGCGGTGCGGCAAGTCTGATGTGAAAGCCC  
GGGGCTCAACCCGCTACTGCATTGAAACTGTGCTACTAGAGTGTGCGGAGGGTAAGTGAATTCCTAGTGTAGCGGTG  
AAATGCGTAGATATATGGAAGAACACCAGTGCGAAGGCAGCTTCTGGTCTGTAACGACGCTGAGGCTCGAAAGCATG  
GGTAG

>ASV:5876:Order:Clostridiales  
TACGTAGGGGGCGAGCGTTGTCCGGAATTAAGGGTGTAAAGGGCGCTAGGCGGCATATTAAGTTAGATGTGAAATTC  
CGGGCTTAACCTGGGCGTTGCATTTAAACTGATAAGCTTGAGTGCCGGAGAGGAAAGCGGAATTCCTAGTGTAGCGGTG  
AAATGCGTAGATATTAGGAGGAACACCAGTGCGAAGGCAGCTTACTGGACGTTAACTGACGCTGAGGCTCGAAAGCGTGG  
GGGAG

>ASV:5877:Genus:Weissella  
TACGTATGTTCCAAGCGTTATCCGGATTTACTGGGCGTAAAGGGAGCGCAGCGGTTATTTAAGTCTGAAGTAAAGCCC  
TCGGCTCAACCGAGGAATTGCTTTGAAACTGGATAACTTGAGTGCAGTAGAGGAAAGTGAAGTCCATGTGTAGCGGTG  
AAATGCGTAGATATATGGAAGAACACCAGTGCGAAGGCAGCTTCTGGACTGTAACGACGTTGAGGCTCGAAAGCGTGG  
GGGAG

>ASV:5878:Genus:Scardovia  
TACGTAGGGTGCAGCGTTGTCCGGATTTACTGGGCGTAAAGGGCTCGTAGGCGGTTTGTTCGCTGCTGGTGTGAAAGCTT  
ACTGCTTAACGGTAGGTTGTGCTGGATACGGGCGAGCTTGAGTGCAGTAGGGGAGACTGGAATTCCTGGTGTAAAGCGTGG  
AATGTGTAGATATCGGGAAGAACACCTATGGCGAAGGCAGGCTCTGGGCTGTTACTGACGCTGAGGAGCGAAAGCGTGG  
GGAGC

>ASV:5879:Family:Desulfovibrionaceae  
TACGGAGGGTGCAGCGTTAATCGGAATTAAGGGTGTAAAGGGCACGTAAGGCTGTATCAAGTCAAGGGTGAATTC  
CGGGCCCAACCTGGAACTGCCTTTGAAACTGGTAACTGGAGTATGTGAGAGGGTGGCGGAATTCCTGGTGTAGGAGTG

AAATCCGTAGATATCAGGAGGAACATCAGTGGCGAAGGCGGCCACCTGGCACAAAACGACGCTGAGGTGCGAAAGCGTG  
GGGAG  
>ASV:5880:Phylum:Proteobacteria  
TACAGAGGTCTCAAGCGTTGTTCCGGAATCACTGGGCGTAAAGCGTGCCTAGGCTGTTTCGTAAGTCGTGTGAAAGCG  
CGGGCTCAACCCGCGGACGGCACATGATACTGCATAACTGGATCCGGGAGAGGACAGCGGAATTCAGGTGTAGGAGTG  
AAATCCGTAGATATCTGGAAGAACATCAGTGGCGAAGGCGGCTTACTGGACGGTAACTGACGTTGAGGCTCGAAAGCGTG  
GGGAG  
>ASV:5881:Genus:Bacteroides  
TACGTAGGGGGCAAGCGTTATCCGGAATTAAGGTTGTAAGGGTGCCTAGGCGGACGCTTAAGTCAGTTGTGAAAGTTT  
GCGGCTCAACCGTAAAATTGCAGTTGATACTGGATATCTTGGTGCAGTTGAGGCAGCGGAATTCGTGGTGTAGCGGTG  
AAATGCTTAGATATCAGGAAGAACTCCGATTGCGAAGGCAGGTTCTCTGGGCCGTTACTGACGCTGAGGAGCGAAAGCGTG  
GGGAG  
>ASV:5882:Genus:Phoceia  
TACGTATGGTGAAGCGTTATCCGGATTTACTGGGTGTAAGGGAGCGTAGGCGGGGCTCAAGTCGAATGTTAAATCTA  
CCGGCTCAACTGGTAGCTGCGTTCGAAACTGGGGCTCTTGGTGAAGTAGAGGCAGGTGGAATTCCTAGTGTAGCGGTGA  
AATGCGTAGATATATGAGGAACACCCGGTGGCGAAAGCGGCTTACTGGACGGTAACTGACGTTGAGGCTCGAAAGCGTG  
GGAGC  
>ASV:5883:Kingdom:Bacteria  
TACGTATGGTGAAGCGTTATCCGGATTTATTGGGTTTAAAGGGGGCGTAGGCGGACGCTTAAGTCAGTTGTGAAAGTTT  
GCGGCTCAACCGTAAAATTGCAGTTGATACTGGTAGTCTTGGTGCAGGAGAGGGAAGCGGAATTCCTAGTGTAGCGGTG  
GAATGCGTAGATATTAGGAGGAACACCCAGTGGCGAAGGCGGCTTCTGGACTGTAAGTCAGGCTGAGGCGCGAGAGCGTG  
GGGAG  
>ASV:5884:Genus:Collinsella  
TACGTAGGGGACAAGCGTTATCCGGATTTACTGGGTGTAAGGGAGCGTAGACGGCACGGCAAGCCAGATGTGAAAGCCC  
GGGGCTCAACCCCGGAAAGCCCGGAACTCCGCGCTTGGGTCCGGTAGGGGAGGTTGGAACACCCGGTGTAGCGGTG  
GAATGCGCAGATATCGGGTGAACACCCGGTGGCGAAGGCGGCCCTCTGGGCCGAGACCGACGCTGAGGCGCGAAAGCTGG  
GGGAG  
>ASV:5885:Family:Lachnospiraceae  
TACGTAGGTCACAAGCGTTGTCCGGAATTAAGGTTGTAAGGGAGCGTAGACGGTACGGCAAGCCAGATGTGAAAGCCC  
GGGGCTCAACCCAGGACTGCATTGGAAGTGTCTGGCTCGAGTGCAGGAGGTAAGCGGAATTCCTAGTGTAGCGGTG  
AAATGCGTAGATATTAGGAAGAACACCCAGTGGCGAAGGCGGCTTCTGGACGTAAGTCAGGCTCAGGCTCGAAAGCGTG  
GGGAG  
>ASV:5886:Order:Bacteroidales  
TACGTAGGTGGCAAGCGTTATCCGGAATTAAGGTTGTAAGGGAGCGTAGGCGGGTCTTAAGTCAGTTGTGAAAGTTT  
GCGGCTCAACCATAGAATTGCCGTTGAAACTGGGAGGCTTGGTATGTTTGGAGCAGCGGAATGCGTGGTGTAGCGGTG  
AAATGCTTAGATATCAGCAGAACCCGATTGCGAAGGCAGCTGCTAGGTTGCGACAGGCTGAGGCACGAAAGCGTG  
GGTAT  
>ASV:5887:Family:Lachnospiraceae  
TACGTAGGGTGAAGCGTTATCCGGAATTAAGGTTGTAAGGGAGCGTAGACGGATGGACAAGTCTGATGTGAAAGGCT  
GGGGCTCAACCCCGGTAAGTGCATTTTAAACTGCTAAGCTAGAGTACAGGAGAGGAAAGCGGAATTCCTAGTGTAGCGGTG  
AAATGCGTAGATATTAGGAAGAACACCCAGTGGCGAAGGCGGCTTACTGGACGATAACTGACGCTGAGGCGCGAAAGCTGG  
GGGAG  
>ASV:5888:Family:Lachnospiraceae  
TACGGAGGATCAAGCGTTATCCGGAATTAAGGTTGTAAGGGAGCGCAGACGGCACTGCAAGTCTGAAGTGAAGGCC  
GGGGCTCAACCCCGGACTGCTTTGGAAGTGTAGAGCTAGAGTGTGGAGAGGCAAGCGGAATTCCTAGTGTAGCGGTG  
AAATGCGTAGATATCGGAAGAACCCGATTGCGAAGGCAGCTTCTGGACTGTAAGTCAGGCTGATGCTCGAAAGTGTG  
GGTAT  
>ASV:5889:Phylum:Firmicutes  
TACGTAGGTGGCAAGCGTTGTCCGGAATTAAGGTTGTAAGGGAGCATGTAGGCGGGCTTTAAGTCTGATGTGAAAGGCT  
GGGGCTCGACCCCGGACTGCATTGGAAGTGCCTGCTTGGTGCAGGAGGTAAGCGGAATTCCTAGTGTAGCGGTG  
AAATGCGTAGATATTAGGAGGAACACCCAGTGGCGAAGGCGGCTGCTGGACTGTTACTGACACTGAGGCACGAAAGCGTG  
GGGAG  
>ASV:5890:Genus:Anaerococcus  
TACGTATGGACCGAGCGTTGTCCGGAATCATTGGGCGTAAAGGGTACGTAGGCGGCCTAGTAAGTTAGAAGTGAAGAAT  
ATAGCTCAACTATATAAAGCTTTTAAACTGTTAGGCTTGGAGATGAAAGGGAAAGTGAATTCCTAGTGTAGCGGTGA  
AATGCGCAGATATTAGGAAGAATACCTGTGGCGAAGGCGACTTCTGGTTCATCATCTGACGCTGAGGTACGAAAGCGTGG  
GTAGC  
>ASV:5891:Genus:Acidaminococcus  
TACGTAGGTGGCAAGCGTTGTCCGGAATTAAGGTTGTAAGGGAGCATGTAGGCGGGCTTTAAGTCCGACGTGAAAATGC  
GGGGCTTAACCCCGTATGGCGTTGGATACTGGGAGTCTTGGTGCAGGAGAGGAAAGGGGAATTCAGTGTAGCGGTGA  
AATGCGTAGATATTGGGAGGAACCCAGTGGCGAAGGCGGCTTCTGGACTGTGCTGACGCTGAGATGCGAAAGCCAGG  
GTAGC  
>ASV:5892:Genus:Akkermansia  
TACGTAGGGTGAAGCGTTATCCGGAATTAAGGTTGTAAGGGGCTCGTAGGCGGTTCTGCGCTCCGGTGTGAAAGGCG  
GGGGCTCAACCCCGGACTGCACATGATACTGCGAGACTAGAGTAATGGAGGGGAAACCGGAATTCCTGGTGTAGCAGTG  
AAATGCGTAGATATCGAGAGGAACATTCGTGGCGAAGGCGGTTCTGGACATTAAGTCAGGCTGAGGCACGAAAGCGTG  
GGGAG  
>ASV:5893:Class:Bacteroidia

TACGGAGGATCCGAGCGTTATCCGGATTTATTGGGTTAAAGGGAGCGTAGGCGGGCTTTAAGTCAGCGGTCAAATGTC  
GTGGCTCAACCATGTCAAGCCGTTGAAACTGTAGGTCTTGAGTACCGGAGAGGTTATCGGAATTCCTTGTAGCGGTGA  
AATGCGTAGATATAAGGAAGAACACCCAGTGGCGAAGGCGGATAACTGGACGGCAACTGACGGTGAGGCGCGAAAGCGTGG  
GGAG

>ASV:5894:Family:Ruminococcaceae

TACGTAGGTGGCGAGCGTTGTCCGGAATTAAGGGTGTAAAGGGAGCGTAGGCGGGAATGCAAGTCGGATGTGAAACCTA  
TGGGCTTAACCCATAGCCTGCATTGAAACTGTGTTTCTTGAAGTGAAGTAGAGGTTGGCGGAATTCCTGTTAGCGGTG  
AATGCGTAGATATCCGGAGGAACACCCAGTGGCGAAGGCGGCCAACTGGGCTTTTACTGACGCTGAGGCTCGAAAGCATG  
GGGAG

>ASV:5895:Family:Ruminococcaceae

TACGTAGGGAGCAAGCGTTGTCCGATTTACTGGGTGTAAAGGGTGCCTAGGCGGCTTTGCAAGTCAGATGTGAAATCTA  
TGGGCTCAACCCATAAACTGCATTTGAAACTGTAGAGCTTGAAGTGAAGTAGAGGCGAGGCGGAATAAGTTAAGTAGCGGTG  
AATGCATAGATATAACTTAGAACTCCGATAGCGAAGGCAGCTTACCAGACTGTAACGACGCTGATGCACGAGAGCGTG  
GGTAT

>ASV:5896:Genus:Christensenellaceae\_R-7\_group

TACGTAGGGGGCGAGCATTGTCCGGAATGACTGGGCGTAAAGGGCGTGTAGGCGGCTTTTAAAGTGTGGAGTGAAAGTCC  
ACTTTTCAAGGGTGAATGCTTTGCAGACTGGAGAGCTTGAAGTGCAGGAGAGGTAAGTGAATTCCTAGTGTAGCGGTG  
AATGCGTAGATATTGGGAGGAACACCCAGTGGCGAAGGCGGCCCTGCTGGGCTTTAAGTGAAGTGAAGTGAAGTGAAGTGA  
GGTAG

>ASV:5897:Genus:Sellimonas

TACGTATGGTGCATGCGTTATCCGGATTTACTGGGTGTAAAGGGAGCGTAGACGGATAGGCAAGTCTGGAGTGAAAACCC  
AGGGCTCAACCTGGGACTGCTTTGAAACTGCAGATCTGGAGTGCAGGAGAGGTAAGCGGAATTCCTAGTGTAGCGGTG  
AATGCGTAGATATTAGGAAGAACTCCGATTGCGAAGGCAGCCGCTAAGCTGCAACTGACATTGAGGCTCGAAAGTGTG  
GGTAT

>ASV:5898:Family:Lachnospiraceae

TACGTATGGTCAAGCGTTATCCGGATTTACTGGGTGTAAAGGGAGCGTAGACGGATGGGCAAGTCTGATGTGAAAACCC  
GGGGCCCAACCCGGGACTGCATTGAAACTGTTTCACTAGAGTGTGGAGAGGTAAGTGAATTCCTAGTGTAGCGGTG  
AATGCGTAGATATTAGGAGGAACACCCAGTGGCGAAGGCGGCTTACTAAACTACAACGACGCTGAAGCACGAAAGCGTG  
GGTAT

>ASV:5899:Family:Streptococcaceae

TACGTAGGTCCCGAGCGTTATCCGGATTTATTGGGCGTAAAGCGAGCGCAGGCGTTAGATAAGTCTGAAGTTAAAGGCT  
GTGGCTTAACCATAGTACGCTTTGAAACTGTTAACTTGAAGTGCAGGAGGAGAGTGAATTCCTAGTGTAGCGGTGA  
AATGCTTAGATATACGAAGAAGTCCGATTGCGAAGGCAGCTCACTAGACTGCAACTGACACTGATGCTCGAAAGTGTGG  
GTATC

>ASV:5900:Phylum:Firmicutes

TACGGAGGATCCGAGCGTTATCCGGATTTATTGGGTTAAAGGGAGCGTAGATGGATGTTTAAAGTCAAGTGTGAAAGTTT  
GCGGCTCAACCTGTGGACTGCGTTTGAAGTGTGACTGAGGAGGTAAGTGAATTCCTAGTGTAGCGGTGA  
AATGCGTAGATATTAGGAGGAACACCCAGTGGCGAAGGCGGCTTACTAGACAGAGACTGACGCTGAGGCGCGAAAGCGTG  
GGGAG

>ASV:5901:Phylum:Firmicutes

TACGGAGGATCCGAGCGTTATCCGGATTTATTGGGTGTAAAGGGTGCCTAGGCGGCTAGGCAAGTCAAGCTGAAAACCA  
TGGGCTCAACCTGTGGACTGCGTTTGAAGTGTGACTGAGGAGGTAAGTGAATTCCTAGTGTAGCGGTG  
AATGCGTAGATATTAGGAAGAACTCCGATTGCGAAGGCAGCTCACTAGACTGTTACTGACACTGATGCTCGAAAGTGTG  
GGGAG

>ASV:5902:Family:Lachnospiraceae

TACGGAGGATCCGAGCGTTATCCGGATTTATTGGGTGTAAAGGGAGCGTAGACGGAGTGGCAAGTCTGATGTGAAAACCC  
GGGGCTCAACCCGGGACTGCATTGAAACTGTAGGACTAGAGTGTGGAGGGTAAGTGAATTCCTAGTGTAGCGGTG  
AATGCGTAGATATTAGGAGGAACACCCAGTGGCGAAGGCAGCTCACTAGACTGTTACTGACACTGATGCTCGAAAGTGTG  
GGTAT

>ASV:5903:Family:Clostridiaceae\_2

TACGTAGGGGCAAGCGTTATCCGGATTTACTGGGCGTAAAGGGTGCCTAGGTTGTTTCTTAAAGTCAAGGTTAAAGGCT  
ACGGCTCAACCTGAGTAAAGCTTTGAAACTGGGAACTTGAAGTGCAGGAGAGGAGAGTGAATTCCTAGTGTAGCGGTGA  
AATGCTTAGATATACGAAGAAGTCCGATTGCGAAGGCAGCTGCTAAGTGCAACTGACATTGAGGCTCGAAAGTGTGG  
GTATC

>ASV:5904:Family:Pasteurellaceae

TACGTATGGGCAAGCGTTATCCGGATTTACTGGGTGTAAAGGGCACGAGGCGGTGACTTAAAGTGAAGTGTGAAAACCC  
CGGGCTTAACTGGGAATTGCATTTACTAGGCTGCTAGAGTACTTAAAGGAGGGGTAGAATTCCTAGTGTAGCGGTG  
AATGCGTAGATATTAGGAAGAACTCCGATTGCGAAGGCAGCTTCTGGACGAAACTGACGCTGAGGCGCGAAAGCCAG  
GGGAG

>ASV:5905:Kingdom:Bacteria

TACGTAGGTGGCAAGCGTTGTCCGATTTACTGGGTGTAAAGGGCGTGTAGCCGGGAGGCAAGTCAAGTGTGAAATCCA  
CGGGCTTAACTGCGTGAATGCAATTTGAAACTGTTCTTCTTGAAGTATCGGAGAGGCAATCGGAATTCCTAGTGTAGCGGTG  
AATGCTTAGAGATGTGGAGGAATACCGAAGGCGAAGGCAGCCCTTGGGAATGTACTGACGCTCATGTGCGAAAGCGTG  
GGGAG

>ASV:5906:Genus:Holdemania

TACGTAGGTGGCGAGCGTTATCCGGATTTATTGGGCGTAAAGGGTGCAGGCGGTTTGTAAAGTTTAAAGTGAAGCGCT  
GGGGCTTAAACCCATATAGCCTTAGAACTGACAGACTAGAGTACAGGAGAGGGCAATGGAATTCCTAGTGTAGCGGTAA  
AATGCGTAGATATTAGGAAGAACTCCGATTGCGAAGGCGGCCCTGCTGGTCTGGATTCTGACACTGAAGCACGAAAGCGTG

GGGAG

>ASV:5907:Family:Lachnospiraceae

TACGGAAGGTCCGGGCGTTATCCGGATTTACTGGGTGTAAGGGGAGCGTAGACGGATGGCAAGTCTGATGTGAAAACCC  
AGGGCTTAACCCCTGGACTGCATTGGAACTGTTGGCTCGAGTGCAGGAGAGAGTGAATTCTAGTGTAGCGGTG  
AAATGCGTAGATATTAGGAGGAACACCAGTTGCGAAGGCGCTTTCTGGACTGTGTCTGACGCTGAGATGCGAAAGCCAG  
GGTAG

>ASV:5908:Family:Lachnospiraceae

TACGGAAGGTCCGGGCGTTATCCGGATTTACTGGGTGTAAGGGGAGCGTAGACGGCGCAGCAAGTCTGATGTGAAAGGCG  
GGGGCTTAACCCCTGGACTGCATTGGAACTGTTGAGCTTGAAGTGCAGGAGGGTAAGCGGAATTCTAGTGTAGCGGTG  
AAATGCGTAGATATTAGGAGGAACACCAGTGGCGAAGGCAGCTCACTGGAGCGCAACTGACGCTGAAGCTCGAAAGTGC  
GGTAT

>ASV:5909:Genus:Johnsonella

TACGTAGGGGGCAAGCGTTATCCGGATTTACTGGGTGTAAGGGGAGCGTAGACGGCATATAAAGTCTGAAGTGAATCCC  
GCAGCTCAACTGCGGAGTTGCTTTGGAACTTATAAGCTGGAGTGTGCGAGGGGTAAGCGGAATCCAGTGTAGCGGTG  
AAATGCGTAGATATTAGGAGGAACACCAGTAGCGAAGGCGCTCTCTGGACTGTAACGACGCTGAGGCACGAAAGCGTG  
GGGAG

>ASV:5910:Family:Lachnospiraceae

TACGTAGGGGGCAAGCGTTATCCGGATTTACTGGGTGTAAGGGGAGCGTAGACGGTAAAGCAAGTCTGAAGTAAAACCC  
GGGGCTCAACCCCGGGACTGCTTTGGAACTGTTAACTAGAGTGTGCGAGAGGTAAGCGGAATGCGTTGTGTAGCGGTG  
AAATGCATAGATATGACGCAGAACTCCGATTGCGAAGGCAGCATACCAACTCGCGACTGACGCTGAGGCTCGAAAGCGTG  
GGTAT

>ASV:5911:Family:Prevotellaceae

TACGGAAGGTCCGGGCGTTATCCGGATTTATTGGGTTAAAGGGGAGCGTAGGCCGTCTGGTAAGCGTGTGTGAAATGTC  
GGGGCTCAACCGTGGCACTGCAGCGCAACTGGGGGCTTGAAGTGCACGCAACGCAGGCGGAATTCGTGGTGTAGCGGTG  
AAATGCTTAGATATCACGAAGAACCCCGATTGCGAAGGCAGCTGCCAGACCGCAACTGACGTTATGCTCGAAAGTGTG  
GGTAG

>ASV:5912:Genus:Anaerostipes

TACGTAGGGGGCAAGCGTTATCCGGATTTACTGGGTGTAAGGGTGCCTAGGTGGTATGGCAAGTCAAGTGAAGTAAAACCC  
AGGGCTTAACCTGGGACTGCTTTGAACTGTCAGACTGGAGTGTGCGAGGGGTAAGTGAATTCTAGTGTAGCGGTG  
AAATGCGTAGATATATGAGGAACACCAGTGGCGAAGGCAGCATCTGGCGCATAACTGACGCTCAGTCCCAGAAAGCGTG  
GGGAG

>ASV:5913:Order:Saccharimonadales

TACGTAGGATCCGAGCGTTATCCGGAGTACTGGGCGTAAAGAGTTGCGTAGGTGGTTAATAAGCGAATAGTGAATCT  
GGTGGCTCAACCATTCAGACTATTATTCGAACTGTTAACTCGAGAGCAGAAGAGGTAGCTGGAATTTCTAGTGTAGGAG  
TGAAATCCGTAGATATTAGAAGGAACACCAGTGGCGTAGGCAGGCTACTGGGCTGTTTCTGACTACTGAGGCACGAAAGCG  
TGGGG

>ASV:5914:Family:Lachnospiraceae

TACGTATGGTCAAGCGTTATCCGGATTTACTGGGTGTAAGGGGAGCGTAGACGGCTGTGCAAGTCTGAAGTAAAAGGCA  
TGGGCTCAACCTGTGGACTGCTTTGAACTGTCAGCTAGAGTGTGCGAGAGGTAAGTGAATTCTAGTGTAGCGGTG  
AAATGCTTAGATATCACGAAGAACTCCGATTGCGAAGGCAGCTCACTGGAGCGCAACTGACGCTGAAGCTCGAAAGTGC  
GGTAT

>ASV:5915:Genus:Necropsobacter

TACGGAAGGTGCGAGCGTTAATCGGAATAACTGGGCGTAAAGGGCACGCAGGCGGACTTTTAAAGTGAAGTGTGAAATCCC  
CGGGCTTAACCTGGGAATTGCATTTAGACTGGGAGTCTAGAGTACTTTAGGAGGGGTAGAATTCCTAGTGTAGCGGTG  
AAATGCGTAGAGATTAGGAAGAACACCAGTGGCGAAGGCAGCTTTCTGGACGCAACTGACGCTGAGGCAGCAAGCGGTG  
GGGAG

>ASV:5916:Family:Ruminococcaceae

TACGTAGGGAGCGAGCGTTGTCGGATTTACTGGGTGTAAGGGGAGCGTAGGCGGGACAGCAAGTTGAATGTGAAATCTA  
TGGGCTCAACCCATAAACTGCTTCAAACCTGTTGTTCTTGAAGTGAAGTAGAGGTAGCGGAATTCCTAGTGTAGCGGTG  
AAATGCATAGATATATGAGGAACACCAGTGGCGAAGGCAGCATCTGGCCTGCAACTGACGTTCAAGTCCCAGAAAGCGTG  
GGGAG

>ASV:5917:Family:Rikenellaceae

TACGTAGGTGGCAAGCGTTATCCGGATTTATTGGGTTAAAGGGTGCCTAGGCGGTTTGATAAGTTAGAGGTGAAATACC  
GGTGCTTAACCCGGAAGTGCCTTAATACTGTTGAACTAGAGAGTAGTTGCGGTAGCGGAATCCATGGTGTAGCGGTG  
AAATGCTCAGATATCATGAAGAATCCAATCGCAAGGCAGGTATCCGGGTGCAACTGACGCTGAGGCTCGAAAGCGTG  
GGGAG

>ASV:5918:Phylum:Firmicutes

TACGTAGGTGGCAAGCGTTATCCGGATTCATTGGGCGTAAAGCGCGCTAGGCGGGCAGATAAGTCTGAGGTAAAAGCCC  
GTGGCTCAACCACGGTAAGCCTTGGAACTGCCAGGCTGGAGTGCAGGAGAGGTAAGCGGAATTCCTAGTGTAGCGGTG  
AATGCGTAGATATTAGGAGGAACACCAGCGCGAAGGCAGCTACTGGACTGTAAGTGAAGTGAAGTGAAGTGAAGTGAAGTGA  
GGAGC

>ASV:5919:Genus:Anaerotruncus

TACGGAAGGTCCGAGCGTTATCTGGATTTATTGGGTTAAAGGGGAGCGTAGATGGATGTTAAGTCAAGTGTGAAAGTTT  
GCGGCTCAACCAGGTGGCTGCGTTCAAACCTGCCGTTCTTGAAGTGAAGTAGAGGCAGGCGGAATTCCTAGTGTAGCGGTG  
AATGCGTAGATATTAGGAGGAACACCAGTGGCGAAGGCAGCTGCTGGGCTTTAACTGACGCTGAGGCTCGAAAGCGGTG  
GGAGC

>ASV:5920:Genus:Bacteroides

TACGGAAGGTCCGAGCGTTATCCGGATTTATTGGGTTAAAGGGGAGCGTAGATGGATGTTAAGTCAAGTGTGAAAGTTT

GCGGCTCAACCGTAAAATTGCAGTTGAAACTGGCAGTCTTGAGTACAGTAGAGGTGGCGGAATTCGTGGTGTAGCGGTG  
GAATGCGTAGATATATGGAAGAACCACAGTGGCGAAGACGGCTGTCTGGTCTGCAACTGACGCTGAGGCTCGAAAGCATG  
GGTAG  
>ASV:5921:Genus:Bacteroides  
TACGTAGGTCCCAGCGTTGTCCGGATTTATTGGGCGTAAAGCGAGCGCAGGCGGTTTGATAAGTCTGAAGTTAAAGGCT  
GTGGCTCAACCGTAAAATTGCAGTTGATACTGGATATCTTGAGTGCAGTTGAGGCAGGCGGAATTCGTGGTGTAGCGGTG  
AAATGCTTAGATATCACGAAGAACCAGATTGCGAAGGCAGCCTGCTAAGCTGCAACTGACATTGAGGCTCGAAAGTGTG  
GGTAT  
>ASV:5922:Genus:Fastidiosipila  
TACGTAGGTGGCAGCGTTATCCGGATTTACTGGGTGTAAGGGCGGTAGGCGGATTCTCAAGTTGGATGTGAAACCCC  
TTGGCTAAACTGAGGGCTTGCATTCAAACTGAGGACCTTGAGTATCAGAGGGGAAAGTGAATTCCTGGTGGAGCGGTA  
AAATGCGTAGAGATCAGGAGGAACACCGTGGCGAAGGCAGCTTCTGGCTGACAACGACGCTGAGGCGCGAAAGCGTG  
GGGAG  
>ASV:5923:Genus:Prevotella  
TACGGAAGGTCCGGCGTTATCCGGATTTATTGGGTTAAAGGGAGCGTAGGCCGCCAGGTAAGCGTGTGTGAAATGTA  
CCGGCTCAACCGGTGAATTGCAGCGCAACTGTTTGGCTTGGTGCAGCGTAAGCAGGCGGAATTCATGGTGTAGCGGTG  
AAATGCTTAGATATCATGAAGAACCAGATTGCGAAGGCAGCTTGTGCAAGTGCAGTGCAGCTGACGCTGATGCTCGAAGGTGCG  
GGTAT  
>ASV:5924:Family:Burkholderiaceae  
TACGTAGGGTCAAGCGTTAATCGGAATTACTGGGCGTAAAGCGTGCAGCGGTTGGGTAAGACAGATGTGAAATCCC  
CGGGCTAAACCTGGGAACCGCATTTGTGACTGTCCGACTGGAGTACGTGAGAGGGGGTGAATTCACGCTGTAGCAGT  
AAATGCTTAGATATCACGAAGAACCAGATTGCGAAGGCAGCCTGCTAAGCTGCAACTGACATTGAGGCTCGAAAGTGTG  
GGTAT  
>ASV:5925:Genus:Oscillibacter  
TACGTAGGTGGCAAGCGTTGTCCGGATTTACTGGGTGTAAGGGCGTGCAGCGGGCCGGCAAGTCAGATGTGAAATCTG  
GAGGCTAAACCTCAAACCTGCATTGAAACTGTAGGCTTGAGTACCGGAGAGGTTATCGGAATTCCTGTGTAGCGGTG  
AAATGCATAGATATCACTCAGAACCAGATTGCGAAGGCATCTCACGAAGGGCGATTGACGCTGAGGCACGAAAGCGTG  
GGGAT  
>ASV:5926:Family:Lachnospiraceae  
TACGTATGGTCAAGCGTTATCCGGATTTACTGGGTGTAAGGGAGCGCAGGCGGTCGGCAAGTCTGATGTGAAAGCCC  
GGGGCTCAACCCCGTACTGCATTTGAAACTGCAGTCTTGAGTACTGGAGAGGCAGACGGAATTCCTAGTGTAGCGGTG  
AAATGCGTAGATATTAGGAGGAACACCAGTAGCGAAGGCAGCTTCTGGTCTGTAACGACACTGAGGCGCGAAAGCGTG  
GGGAG  
>ASV:5927:Family:Streptococcaceae  
TACGTAGGGGGCAAGCGTTATCCGGATTTACTGGGTGTAAGGGAGCGTAGACGGTGTGGCAAGTCTGATGTGAAAGGCA  
GTGGCTCAACCATTTGAGGCTTTGAAACTGTTAACTTGAGTGCAGAAGGGGAGAGTGAATTCATGTGTAGCGGTGA  
AATGCGTAGATACATGGAGGAACACCGGTGGCGAAAGCGGCTCTCTGGTCTGTAACGACGCTGAGGCTCGAAAGCGTG  
GGAGC  
>ASV:5928:Genus:Candidatus\_Stoquefichus  
TACGTAGGTGGCAGCGTTATCCGGATTCATTGGGCGTAAAGAGGGAGCAGGCGGCAATAGAGGTCTGCGGTGAAAGCCT  
GAAGCTAAACTTCGGTAAGCCGTGGAAACCAATAGCTAGAGTGCAGTAGAGGATCGTGAATTCATGTGTAGCGGTGA  
AATGCGTAGATATATGGAGGAACACCAGCGGGCAAGGCAGCATCTGGGCTGTAACGACGCTCAGTCCCAGAAAGCGTG  
GGAGC  
>ASV:5929:Genus:Atopobium  
TACGTAGGGGGCAAGCGTTATCCGGATTCATTGGGCGTAAAGCGCTCGTAGGCGGTCTGTTAGGTCCGGAGTTAAATCCG  
GGGGCTCAACCCCGTTCGCTCCGATACCGGCAGACTTGAGTTGGTAGGGGAAAGTGAATTCCTAGTGTAGCGGTGG  
AATGCGCAGATATTAGGAAGAACCACAGTGGCGAAGGCAGCCTTCTGGCCATAACTGACGCTGAGGCACGAAAGCATG  
GTAGC  
>ASV:5930:Kingdom:Bacteria  
TACGTAGGATCCGAGCGTTATCCGGATTTATTGGGTTAAAGGGAGCGTAGGTGGATTGTTAAGTCAGTTGTGAAAGTTT  
GCGGCTCAACCGTAAAATTGCAGTTGAAACTGGCAGTCTTGAGTACAGTAGAGGTGGCGGAATTCGTGGTGTAGCGGTG  
AAATGCGTAGAGATGTGGAGGAATACCGAAGGCAGGCGAGCCCTTGGAATGTACTGACGCTCATGTGCGAAAGCGTG  
GGGAG  
>ASV:5931:Family:Peptococcaceae  
TACGTAGGGAGCAGCGTTGTCCGGATTTACTGGGCGTAAAGGGCGCGTAGGCGGGAACCTAAGTTAGGTGTGAAAACCT  
TGGGCTCAACCAAAGACTGCATTTAAACTGGGTTCTTGAGGGCAGGAGAGGAAAGTGAATTCCTAGTGTAGCGGTG  
AAATGCGTAGATATTAGGAGGAACACCAGTGGCGAAGGCAGCTTCTGGAAGTGTACTGACGCTGAGGCGCGAAAGCATG  
GGGAG  
>ASV:5932:Family:Peptococcaceae  
TACGTAGGGAGCAAGCGTTGTCCGGATTTACTGGGCGTAAAGGGCGCGTAGGCGGATTGTTAAGTCAGATGTGAAATCTC  
CGGGCTCAACCCGAGCGTGCATTTGAAACTGGGTTCTTGAGGGCAGGAGAGGAAAGTGAATTCCTAGTGTAGCGGTG  
AAATGCGTAGATATTAGGAGGAACACCAGTGGCGAAGGCAGCTTCTGGAAGTGTACTGACGCTGAGGCGCGAAAGCATG  
GGTAG  
>ASV:5933:Genus:Caproiciproducens  
TACGTAGGGAGCAAGCGTTGTCCGGATTTACTGGGTGTAAGGGTGCAGTGGCGGACTGCAAGTCAGGTGTGAAAACCG  
TCGGCTCAACCGATCGCTGCATTTGAAACTGGGTTCTTGAGTGAAGTAGAGGTAGGCGGAATTCCTGGTGTAGCGGTG  
AAATGCGTAGAGATCGGGAGGAACACCAGTGGCGAAGGCAGCCTACTGGGCTTAACTGACGCTGAGGCACGAAAGCATG  
GGTAG

>ASV:5934:Kingdom:Bacteria  
AACGTAGGTCACAAGCGTTGTCCGGAATTACTGGGTGTAAAGGGAGCGCAGGCGGGCGATCAAGTTGGAAGTGAAATCCA  
TGGGCTCAACCCATGAAGTCTTTCAAAGTCTGGCCTTGAGTAGTGCAGAGGTAGTGGAATCCACGTGTAGCAGTG  
AAATGCGTAGATATGTGGAAGAACCAGTGGCGAAGGCAGCTCCTGGGACATAACTGACGCTCAGGCACGAAAGCGTG  
GGGAG

>ASV:5935:Family:Ruminococcaceae  
TACGTAGGGGGCAAGCGTTATCCGGATTTACTGGGTGTAAAGGGAGCGCAGGCGGACCGGCAAGTTGGAAGTGAAATCCA  
TGGGCTCAACCCATGAAGTCTTTCAAAGTCTGGCCTTGAGTAGTGCAGAGGTAGGCGGAATCCCGGTGTAGCAGTG  
GAATGCGTAGATATCACGAAGAACCAGTGGCGAAGGCAGCTTACTAACCTGTAAGTACACTGATGCTCGAAAGTGTG  
GGTAT

>ASV:5936:Family:Peptostreptococcaceae  
TACGTAGGGGGCTAGCGTTATCCGGAATTACTGGGCGTAAAGGGTGCAGGTGGTTTCTTAAGTCAAGGTGAAAGGCT  
ACGGCTCAACCCGGAAGTCTTTGAAACTGTAGAAGTGTAGTGCAGGAGAGGTAAGTGAATTCCTAGTGTAGCAGTG  
AATGCGTAGATATTAGGAGGAACACCAGTGGCGAAGGCAGCTTGTGCGGGGCATAACTGACGCTGAGGCGGAAAGCGTG  
GGAGC

>ASV:5937:Family:Lachnospiraceae  
TACGTAGGGGGCAAGCGTTATCCGGATTTACTGGGTGTAAAGGGAGCGTAGACGGTTTTGCAAGTCTGAAGTGAAGGCC  
GGGGCTTAACCCGGAAGTCTTTGAAACTGTAGAAGTGTAGTGCAGGAGAGGTAAGTGAATTCCTAGTGTAGCAGTG  
AAATGCGTAGATATCACGAAGAATCCGATCGCAAGGCATTGTGCCGGGCATAACTGACGCTGAGGCTCGAAAGTGTG  
GGTAT

>ASV:5938:Genus:Lachnoclostridium  
TACGTAGGGGGCAAGCGTTATCCGGATTTACTGGGTGTAAAGGGAGCGTAGACGGCGAAGCAAGTCTGAAGTGAAGGCC  
GGGGCTCAACCCGGAAGTCTTTGAAACTGTAGAAGTGTAGTGCAGGAGAGGTAAGTGAATTCCTAGTGTAGCAGTG  
AAATGCGTAGATATTAGGAGGAACACCAGTGGCGAAGGCAGCTTGTGCGGGGCATAACTGACGCTGAGGCTCGAAAGCGTG  
GGGAG

>ASV:5939:Genus:Acetanaerobacterium  
TACGTAGGTGGCAAGCGTTGTCCGGAATTACTGGGTGTAAAGGGAGCGTAGGCGGCTTGTCAAGTTGAATGTTAAACTA  
TCGGCTTAACCCGGAAGTCTTTGAAACTGTAGAAGTGTAGTGCAGGAGAGGTAAGTGAATTCCTAGTGTAGCAGTG  
AAATGCGTAGATATTAGGAGGAACACCAGTGGCGAAGGCAGCTTGTGCGGGGCATAACTGACGCTGAGGCTCGAAAGCGTG  
GTAGC

>ASV:5940:Family:Ruminococcaceae  
TACGTAGGTGGCAAGCGTTGTCCGGAATTACTGGGTGTAAAGGGAGCGTAGGCGGCTTGTCAAGTCAAGTGTGAAATACC  
GGGGCTTAACCCGGAAGTCTTTGAAACTGTAGAAGTGTAGTGCAGGAGAGGTAAGTGAATTCCTAGTGTAGCAGTG  
AAATGCGTAGATATTAGGAGGAACACCAGTGGCGAAGGCAGCTTCTGGACAGAACTGACGCTGAGGCGGAAAGCGTG  
GGGAG

>ASV:5941:Genus:Dialister  
TACTTCTTTTTCCCTCTTTTTCTTCTTGGGCGTAAAGCGCGCAGGCGGCTTCTTAAGTCCATCTTAAAGTGC  
GGGGCTTAACCCGATGATGGGATGAAACTGAGAGGCTGAGTATCGGAGAGGAAAGTGAATTCCTAGTGTAGCAGTG  
AAATGCGTAGAGATTAGGAAGAACCAGTGGCGAAGGCAGCTTCTGGACAGAACTGACGCTGAGGCGGAAAGCGTG  
GGAGC

>ASV:5942:Genus:GCA-900066755  
TACGTATGGAGCAAGCGTTATCCGGATTTACTGGGTGTAAAGGGTGCAGGCGGTTATGCAAGTCCGATGTGAAAGGCC  
GGGGCTTAACCCGGAAGTCTTTGAAACTGTAGAAGTGTAGTGCAGGAGAGGTAAGTGAATTCCTAGTGTAGCAGTG  
AAATGCTTAGAGATCATAAGAACACCAGTGGCGAAGGCAGCTTACCAAATATATGACGTTGAGGCACGAAAGCGTG  
GGGAG

>ASV:5943:Family:Clostridiaceae\_1  
TACGTAGGTGGCGAGCGTTGTCCGGAATTACTGGGCGTAAAGGGAGCGTAGGCGGACTTTTAAGTGAAGTGTGAAATCCC  
CGGGCTCAACCTGGGAAGTCTTTGAAACTGTAGAAGTGTAGTGCAGGAGAGGTAAGTGAATTCCTAGTGTAGCAGTG  
AAATGCGTAGAGATCTGGAAGAACCAGTGGCGAAGGCAGCTTCTGGACTGTAAGTACGCTGAGGCTCGAAAGCGTG  
GGGAG

>ASV:5944:Genus:Rubellimicrobium  
TACGGAGGGGTTAGCGTTGTTCGGAATGACTGGGCGTAAAGCGCGCTAGGCGGATCATGCAAGTCCGGGGTGAATCC  
CGGGGCTCAACCCGGAAGTGGCCTTCGAGACTGTGGTCTTGAGTTCGAGAGAGGTAGTGAATTCAGTGTAGAGGT  
GAAATTCGATAGATATTCGAGGAACACCAGTGGCGAAGGCAGCTCAGTGGCTCGACACTGACGCTGAGGTGCGAAAGCGT  
GGGGA

>ASV:5945:Family:Lachnospiraceae  
TACGTATGGTGAAGCGTTATCCGGATTTACTGGGTGTAAAGGGTGCAGGTTGGTATGGAAGTCAAGTGAAGGCT  
GGGGCTCAACCCGGAAGTCTTTGAAACTGTAGAAGTGTAGTGCAGGAGAGGTAAGTGAATTCCTAGTGTAGCAGTG  
AAATGCTTAGATATCACGAAGAACCAGTGGCGAAGGCAGCTCACTGGACTGTTACTGACACTGAGGCTCGAAAGTGT  
GGTA

>ASV:5946:Family:Lachnospiraceae  
TACGTATGGTGAAGCGTTATCCGGATTTACTGGGTGTAAAGGGAGCGCAGGCGGTGCGGCAAGTCTGATGTGAAATCC  
GGGGCTCAACCCGGAAGTCTTTGAAACTGTAGAAGTGTAGTGCAGGAGAGGTAAGTGAATTCCTAGTGTAGCAGTG  
AAATGCGTAGATATTAGGAGGAACATCAGTGGCGAAGGCAGCTGCGGACTGTTACTGACACTGAGGCACGAAAGCGTG  
GGGAG

>ASV:5947:Family:Lachnospiraceae  
TACGTAGGGGGCAAGCGTTATCCGGATTTACTGGGTGTAAAGGGAGCGTAGACGGAGCAGCAAGTCTGATGTGAAAGGCC  
GGGGCTCAACCCGGAAGTCTTTGAAACTGTAGAAGTGTAGTGCAGGAGAGGTAAGTGAATTCCTAGTGTAGCAGTG

GAATGCGTAGATATCGGGAGGAACACCAGTGGCGAAGGCGACCTACTGGGCACCAACTGACGCTGAGGCTCGAAAGCGTG  
GGGAG  
>ASV:5948:Family:Lachnospiraceae  
TACGTATGGAGCAAGCGTTATCCGGATTTACTGGGTGTAAGGGAGTGATAGGTGGCCAGGCAAGTCAGAAGTGAAAGCCC  
GGGGCTCAACCCGGGACTGCTTTTGAACCTGCAGGGCTAGAGTGTAGGAGAGGACAGCGGAATTCAGGTGTAGGAGTG  
AAATCCGTAGATATCTGGAAGAACATCAGTGGCGAAGGCGGCTGTCTGGACCGTATTGACGCTGAGGCGCGAAAGCGTG  
GGTAG  
>ASV:5949:Family:Ruminococcaceae  
TACGGAAGGTCCAGGCGTTATCCGGATTTATTGGGTTAAAGGGAGCGCAGGCGGACCAGGCAAGTTGGAAGTGAATACTA  
TGGGCTCAACCCATAAATTGCTTTCAAACCTGCTGGCCTTGTAGTGTGACAGAGGTAGGTGGAATTCAGGCTGTAGCGGTG  
GAATGCGTAGATATCGGGAGGAACACCAGTGGCGAAGGCGGCTTGTCTGGACGATGACTGACGTTGAGGCTCGAAAGCGTG  
GGGAG  
>ASV:5950:Order:Lactobacillales  
AACGTAGGTCAACAGCGTTGTCCGGAATTTATTGGGCGTAAAGCGAGTGCAGGCGGTCCAATAAGTTTGTATGTAAGCCT  
TCGGCTCAACCCGAGAATTGCATCAGAACTGTTAAACTTGTAGTGCAGAAGAGGAGAGTGGAACTCCATGTGTAGCGGTG  
GAATGCGTAGATATATGGAAGAACACCAGTGGCGAAGGCGCCTTTCTGGACTGTGTCTGACGCTGAGATGCGAAAGCCAG  
GGTAG  
>ASV:5951:Genus:Turicibacter  
TACGTAGGTGGCAGCGTTATCCGGAATTTATTGGGCGTAAAGAGCGCGCAGGTGGTTGATTAAGTCTGATGTGAAAGCCC  
ACGGCTTAACCGTGGAGGGTCAATTGGAACCTGCTCGACTTGTAGTGCAGAAGAGGGAAGTGGAAATTCATGTGTAGCGGTG  
GAATGCGTAGATATCGGGAGGAACACCAGTGGCGAAGGCGGCTACTGGGCACCAACTGACGCTGAGGCTCGAAAGCATG  
GGTAG  
>ASV:5952:Genus:Erysipelatoclostridium  
TACGTAGGGTGAACAGCGTTATCCGGAATTTATTGGGCGTAAAGAGGGAGCAGGCGGCAGCAAGGGTCTGTGGTAAAGCCT  
GAAGCTTAACCTCAGTAAGCCATAGAAACAGGCAGCTAGAGTGCAGGAGAGGATCGTGGAAATTCATGTGTAGCGGTGA  
AATGCATAGAGATCATACAGAACACCAGTGGCGAAGGCGAGCTTACCAAACTATATCTGACGTTGAGGACGAAAGCGTGG  
GGAGC  
>ASV:5953:Family:Lachnospiraceae  
TACGTAGGGGGCAAGCGTTATCCGGAATTTACTGGGCGTAAAGGGTGCCTAGGTGGTATTAAAGTCAAGCGGTGAAAGTTT  
GTGGCTCAACCCCGGTACTGCATTGGAACCTGTCGGACTAGAGTGTCTGGAGGGTAAGTGGAAATTCCTAGTGTAGCGGTG  
AAATGCGTAGATATTAGGAGGAACACCAGTGGCGAAGGCGGCTTACTGGACGGTAACTGACGTTGAGGCTCGAAAGCGTG  
GGGAG  
>ASV:5954:Family:Lactobacillaceae  
TACGTAGGTGGCAAGCGTTATCCGGAATTTACTGGGTGTAAGGGAGCGCAGGCGGTGCGGCAAGTCTGATGTGAAAGCCC  
GGGGCTCAACCCCGGTACTGCATCGGAACTGTCAGACTTGTAGTGCAGAAGAGGACAGTGGAACTCCATGTGTAGCGGTG  
GAATGCGTAGATATATGGAAGAACACCAGTGGCGAAGGCGGCTGTCTGGTCTGCAACTGACGCTGAGGCTCGAAAGCATG  
GGTAG  
>ASV:5955:Family:Lachnospiraceae  
TACGTAGGGGGCAAGCGTTATCCGGAATTTACTGGGTGTAAGGGAGCGTAGACGGTGTGACAAGTCTGATGTGAAAGGCA  
TGGGCTCAACCTGTGGACTGCATTGGAACCTGTCATCTTGTAGTGCAGTGGAGGAGACTGGAATTCCTGGTGTAGCGGTG  
GAATGCGTAGATATCAGGAAGAACACCAGTGGCGAAGGCGGCTCTCTGGCCGTTACTGACGCTGAGGAGCGAAAGCGTG  
GGGAG  
>ASV:5956:Family:Lachnospiraceae  
TACGTAGGTGGCAAGCGTTATCCGGAATTTACTGGGTGTAAGGGAGCGCAGGCGGTGCGGCAAGTCTGATGTGAAAGCCC  
GGGGCTCAACCCCGGACTGCATTTGGAACCTGTCAGGCTAGAGTGTCTGGAGAGGAAAGCGGAATTCCTAGTGTAGCGGTG  
AAATGCGTAGATATTAGGAGGAACACCAGTGGCGAAGGCGACTTACTAACCTGTAACGACATTGATGCTCGAAAGTGTG  
GGTAT  
>ASV:5957:Family:Ruminococcaceae  
TACGTAGGATGCAAGCGTTATCCGGAATTTACTGGGTGTAAGGGAGCGCAGGCGGGACTTCAAGTTGGATGTGAAAGGTC  
AAGGCTTAACCTTGGCACTGCATCCAAAACCTGTAGTCTTGTAGTGGAGTAGAGGTAAGCGGAATTCAGTGTAGCGGTG  
AAATGCGTAGATATATGGAAGAACACCAGTGGCGAAGGCGACTCTCTGGTCTGTAACGACGCTGAGGCTCGAAAGCGTG  
GGTAG  
>ASV:5958:Family:Erysipelotrichaceae  
TACGTAGGTGGCAAGCGTTATCCGGAATCGTTGGGCGTAAAGGGTGCCTAGGTGGCGTACTAAGTCTGTAGTAAAAGGCA  
ATGGCTCAACCATTTGAAGCTATGGAACCTGGTATGCTGGAGTGCAGAAGAGGGCGATGGAATTCATGTGTAGCGGTGA  
AATGCTTAGATATACGAAGAACCTCCGATTGCGAAGGCGAGCTCACTAGACTGTCACTGACACTGATGCTCGAAAGTGTGG  
GTATC  
>ASV:5959:Genus:Phascolarctobacterium  
TACGTAGGTGGCAGCGTTGTCCGGAATTTATTGGGCGTAAAGAGCATGTAGGCGGCTTAAATAAGTCCAGCGTGAAAATGC  
GGGGCTCAACCCCGTATGGCGCTGGAACCTGTTAGGCTTGTAGTGCAGGAGAGGAAAGGGGAATTCAGTGTAGCGGTGA  
AATGCGTAGAGATGTGGAGGAATACCGAAGGCGAAGGCGAGCTCACTAGACTGTCACTGACACTGATGCTCGAAAGTGTGG  
GTATC  
>ASV:5960:Family:Lachnospiraceae  
TACGGAGGATCCGAGCGTTATCCGGAATTTATTGGGTTAAAGGGAGCGTAGATGGATGCTTAAAGTCAAGTGTGAAAGTTT  
GCGGCTCAACCCCGGACTGCATTGGAACCTGCCGCTTGTAGTGCAGGAGAGGTAAGCGGAATTCCTAGTGTAGCGGTG  
AAATGCGTAGACATTAGGAGGAACACCAGTGGCGAAGGCGGCTTACTGGACGGTAACTGACGTTGAGGCTCGAAAGCGTG  
GGGAG  
>ASV:5961:Genus:Pseudomonas

TACGAAGGGTGAAGCGTTAATCGGAATTATTGGGCGTAAAGCGCGGTAGGTGGTTCGTCAAGTTGGATGTGAAAGCCC  
CGGGCTCAACCTGGGAACTGCATCCAAAACCTGGCGAGCTAGAGTACGGTAGAGGGTGGTGAATTTCTGTGTAGCGGTG  
AAATGCGTAGATATAGGAAGAACACCACTGGCAGGCGACACCTGGACTGATACGACTGAGGTGCGAAAGCGTG  
GGGAG

>ASV:5962:Genus:Moraxella

TACAGAGGGTGAAGCGTTAATCGGAATTACTGGGCGTAAAGCGCGGTAGGTGGTCAATTAAGTCAGATGTGAAAGCCC  
CGGGCTTAACCTGGGAACTGCATCTGATACTGGATAACTAGAGTAGGTGAGAGGGGAGTGAATTCAGGTGTAGCGGTG  
AAATGCGTAGAGATCTGGAGGAATACCGATGGCAGGCGACTCCCTGGCATCATACTGACTGAGGTGCGAAAGCGTG  
GGTAG

>ASV:5963:Genus:Coprococcus\_2

TACGTAGGTGGCAAGCGTTGTCCGGAATTATTGGGCGTAAAGCGCGCAGGCGGCTTCCCAAGTCCCTCTTAAAAATCC  
GGGGCTCAACCCGGAAGTGTCTTGGAAACTGTTTAGCTGGAGTACAGGAGAGGTAAGTGAATTCCTAGTGTAGCGGTG  
AAATGCGCAGATATTAGGAGGAACACCACTGGCAGGCGACTTACTGGACTGCTACTGACTGAGGCACGAAAGCGTG  
GGGAG

>ASV:5964:Family:Ruminococcaceae

TACGGAGGATGAAGCGTTATCCGGATTTATTGGGTGTAAGGGAGCGTAGGCGGGATCGCAAGTCAGATGTGAAAACCTA  
TGGGCTTAACCCATAAACTGCATTTGAAACTGTGGTCTTGGAGTCTGGAGAGGCAAGTGAAGTCCCTAGTGTAGCGGTG  
AAATGCGTAGATATTAGGAGGAACACCACTGGCAGGCGGCTACTGGGCACCAACTGACGCTGAGGCTCGAAAGTGTG  
GGTAG

>ASV:5965:Genus:Ruminococcaceae\_UCG-005

TACGTAGGGAGCGAGCGTTGTCCGGAATTACTGGGTGTAAGGGCGGTAGGCGGAGATGCAAGTTGGGAGTGAAATCCA  
TGGGCTCAACCCATGAAGTGTCTCAAACCTGTATCCCTTGGAGTATCGGAGAGGCAAGCGGAATTCCTAGTGTAGCGGTG  
AAATGCGTAGATATTAGGAGGAACACCACTGGCAGGCGGCTCTCTGGACTGTAACGACTGAGGCACGAAAGCGTG  
GGGAG

>ASV:5966:Family:Lachnospiraceae

TACGGAGGATGAAGCGTTATCCGGAATTATTGGGTTAAAGGGAGCGTAGGCGGGCAGGCAAGTCAGGCGTGAAATATA  
TCGGCTCAACCGGTAACGGCGCTTGAACCTGCAGGGCTAGAGTGCAGGAGGGCAAGTGAATTCCTAGTGTAGCGGTG  
AAATGCGTAGATATTAGGAGGAACACCACTGGCAGGCGGCTTCTGGACTGTAACGACTGACACTGAGGCTCGAAAGCGTGG  
GGAGC

>ASV:5967:Family:Ruminococcaceae

TACGTAGGTGGCAAGCGTTGTCCGGAATTACTGGGTGTAAGGGCGGTAGCCGGGCGGCAAGTCAGATGTGAAATCTG  
GAGGCTTAACCTCCTAACTGCATTTGAAACTGTAGGCTTGGAGTGTGAGGAGGTAAGTGAATTCCTAGTGTAGCGGTG  
GAATGCGTAGATATTAGGAGGAACACCACTGGCAGGCGGCTACTGGGCACCAACTGACGCTGAGGCTCGAAAGCATG  
GGTAG

>ASV:5968:Genus:Oscillospira

TACGGAGGATCCGAGCGTTATCCGGAATTATTGGGTTAAAGGGAGCGTAGGCGGGTGTGCAAGTCAGATGTGAAATCTG  
GAGGCTCAACCTCCTAACTGCATTTGAAACTGTGCATCTTGGAGTATCGGAGAGGTAATCGGAATTCCTTGTGTAGCGGTG  
AAATGCGTAGATATAAGGAAGAACACCACTGGCAGGCGGATTACTGGACGACAACCTGACGCTGAGGCTCGAAAGCGTG  
GGGAG

>ASV:5969:Genus:Acetanaerobacterium

TACGTAGGGAGCAAGCGTGTCCGGAATTACTGGGTGTAAGGGAGCGTAGGCGGGTGTCAAGTTGAATGTGAAATGCA  
GAGGCTCAACCTCTGTATTGCGTTCAAACCTGAGTATCTTGGAGTGAAGTAGAGGAGGTAAGCGGAATTCCTAGTGTAGCGGTG  
AAATGCTTAGATATCACGAAGAACCTCCGATTGCGAAGGCGGCTTCTGGACTGTAACGACTGACGCTGATGCTCGAAAGTGTG  
GGTAT

>ASV:5970:Family:Lachnospiraceae

TACGTATGGTGCAAGCGTTATCCGGAATTACTGGGTGTAAGGGAGCGTAGGCGGGTGTGCGCAAGTCTGATGTGAAAGCCC  
GGGGCTCAACCCCGGACTGCTTTGAAACTGCAGGGCTAGAGTGCAGGAGGGTGAAGTGAATTCCTAGTGTAGCGGTG  
AAATGCGTAGATATTAGGAGGAACACCACTGGCAGGCGGCTACTGGACTGCAACTGACATTGAGGCTCGAAAGTGTG  
GGTAT

>ASV:5971:Family:Lachnospiraceae

TACGTAGGGGCGAGCGTGTCCGGAATTACTGGGCGTAAAGGGTGTGCTAGGCGGTTTGGTAAGTTGGATGTGAAATACC  
CGGGCTCAACCCCTGGACTGCATTGAAACTGCCAGTCTTGGAGTCCGAGAGGTAAGCGGAATTCCTAGTGTAGCGGTG  
AAATGCGTAGATATTAGGAGGAACACCACTGGCAGGCGGCTTACTGGACGCAACTGACGTTGAGGCTCGAAAGCGTG  
GGGAG

>ASV:5972:Genus:Acetanaerobacterium

TACGTAGGGAGCAAGCGTGTCCGGAATTACTGGGTGTAAGGGAGCGTAGGCGGGCTCGCAAGTTGAATGTGAAATCCA  
GAGGCTTAACCTCTGGCTGCGTTCAAACCTGCAGGCTTGGAGTGAAGTAGAGGAGGTAAGCGGAATTCCTAGTGTAGCGGTG  
AAATGCGTAGATATTAGGAGGAACACCACTGGCAGGCGGCTTACTGGACTGCAACTGACATTGAGGCTCGAAAGCATGG  
GTAGC

>ASV:5973:Family:Lachnospiraceae

TACGGAGGATCCGAGCGTTATCCGGAATTATTGGGTTAAAGGGAGCGTAGGTGGACAGTAAAGTCAGTTGTGAAAGCCC  
GGGGCTCAACCCCGGACTGCATTTGAAACTGTGAGGCTAGAGTGTGCGAGAGGAAAGCGGAATTCCTAGTGTAGCGGTG  
AAATGCGTAGATATAGGAGGAACACCACTGGCAGGCGGCTTACTGGCGATAACTGACGCTCAGTCCGAAAGCGTG  
GGGAG

>ASV:5974:Genus:Pseudoflavonifractor

TACGGAGGATCCGAGCGTTATCCGGAATTATTGGGTTAAAGGGAGCGTAGGTGGACAGTAAAGTCAGTTGTGAAAGTTT  
GCGGCTCAACCCGTAATGCAAGTGTGAAACTGTAGTCTTGGAGTGTGCGAGAGGCAATCGGAATTCCTAGTGTAGCGGTG  
AAATGCGTAGATATACGGAGGAACACCACTGGCAGGCGGCTTCTGGACTGTAACGACTGAGGCTCGAAAGCGTG



GGGAG  
>ASV:5975:Family:Lachnospiraceae  
AACGTAGGGTGCAAGCGTTGTCCGGAATTACTGGGTGTAAGGGGAGCGCAGGCGGACC GGCAAGTTGGAAGTAAAACTA  
TGGGCTCAACCCCGGACTGCTTTTAAACTGCAGGGCTAGAGTGCAGGAGGGCAAGTGAATTCTAGTGTAGCGGTG  
AATGCGTAGATATTAGGAGGAACACCAGTGGCGAAGGCGCTCTCTGGTCTGTAACGACGCTGAGGCTCGAAAGCGTG  
GGGAG  
>ASV:5976:Genus:Veillonella  
TACGTAGGTCCGAGCGTTGTCCGGAATTATTGGGCGTAAAGCGCGCAGGCGGATTGGTCAGTCTGTCTTAAAAGTTC  
GGGGCTTAACCCCGTATGGGATGGAACCTGCAATCTAGAGTATCGGAGAGGAAAGTGAATTCTAGTGTAGCGGTGA  
AATGCGTAGATATTGGAAGAACAACCAATGGCGAAGGCAGGTCTCTGGGCCCTTACTGACGCTGAGGAGCGAAAGCGTGG  
GGAGC  
>ASV:5977:Genus:Erysipelatoclostridium  
TACGTAGGTGGCAAGCGTTATCCGGAATTATTGGGGTAAAGAGGGAGCAGGCGGACGCAAGGGTCTGTGGTAAAAGCCT  
GAAGCTTAACCTCAGTAAGCCATAGAAACCAGGCAGCTAGAGTGCAGGAGAGGATCGTGAATTCCATGTGTAGCGGTGA  
AATGCGTAGATATATTAGGAGGAACACCAGTGGCGAAGGCGACGATCTGGCCTGCAACTGACGCTCAGTCCGAAAGCGTGG  
GGAGC  
>ASV:5978:Family:Lachnospiraceae  
AACGTAGGGTGCAAGCGTTGTCCGGAATTACTGGGTGTAAGGGGAGCGTAGACGGCATAACAAGTCTGATGTAAAAGGCT  
GGGGCTTAACCCCGGACTGCATTGGAACCTGTTGAGCTTGTAGTGCAGGAGGGGTAAGCGGAATTCTAGTGTAGCGGTG  
AATGCGTAGATATTAGGAGGAACACCAGTGGCGAAGGCAGCTTACCAAATATATCTGACGTTGAGGCACGAAAGCGTG  
GGGAG  
>ASV:5979:Family:Family\_XIII  
TACGGAGGATCCGAGCGTTATCCAGAATTATTGGGCGTAAAGAGTGCCTAGGTGTAACCTAAGCGCGGGTTTAAAGCA  
ATGGCTTAACCTATTGTCGCCCTGCGAACTGGGATACTTGTAGTGCAGGAGAGGAAAGCGGAATTCTAGTGTAGCGGTGA  
AATGCGTAGATATTAGGAGGAACACCAGTGGCGAAGGCAGCTCACTGGACTGCAACTGACATTGAGGCTCGAAAGTGTGG  
GTATC  
>ASV:5980:Family:Lachnospiraceae  
TACGTATGGAGCAAGCGTTATCCGGAATTTACTGGGTGTAAGGGTGCCTAGGTGGCAGTGCAAGTCAAGTGTAAAAGGCC  
GGGGCTCAACCCCGGACTGCTTTGGAACCTGCAGATCTGGAGTGCAGGAGAGGTAAGCGGAATTCTAGTGTAGCGGTG  
AATGCGTAGATATTAGGAGGAACACCAGTGGCGAAGGCAGCTTACCAAATATATCTGACGTTGAGGCACGAAAGCGTG  
GGGAG  
>ASV:5981:Family:Erysipelotrichaceae  
TACGGAGGATTGCAAGCGTTATCCGGAATTTATTGGGTTAAAGGGTGCCTAGGCGGTACATTAAGTCCGAAGTAAAAGGCA  
GCGGCTCAACTGCTGTTGGCTTTGGAACCTGGTGAAGTGCAGGAGAGGGCGATGGAATTCCATGCGTAGCGGTAA  
AATGCGTAGATATTAGGAGGAACACCAGTGGCGAAGGCAGCTTACTGGACGATAACTGACGTTGAGGCTCGAAAGCGTG  
GGAGC  
>ASV:5982:Genus:Ruminococcaceae\_UCG-002  
TACGTAGGTGGCAAGCGTTGTCCGGAATTTACTGGGTGTAAGGGGCGTGACGCGGGAATGCAAGTCAAGTGTGAAATCCA  
TGGGCTTAACCCATGAAGTGCATTTGAAACTGTATTTCTTGTAGTACTGGAGAGGCAATCGGAATTCTAGTGTAGCGGTG  
AATGCGTAGATATTAGGAGGAACACCAGTGGCGAAGGCGGCTGCTGGACGATGACTGACGTTGAGGCTCGAAAGCGTG  
GGGAG  
>ASV:5983:Phylum:Firmicutes  
TACGGAGGATTCAAGCGTTATCCGGAATTTATTGGGTTAAAGGGTGCCTAGGCGGTTTGATAAGTTAGAGGTGAAATCCC  
GGGGCTCAACCCCGTACTGCATTGGAACCTGTCGGACTAGAGTGTCCGAGGGGTAAGTGAATTCTAGTGTAGCGGTG  
AATGCGTAGATATTAGGAGGAACACCAGTGGCGAAGGCAGCTTACCAAATATATCTGACGTTGAGGCTCGAAAGCGTG  
GGGAG  
>ASV:5984:Family:Ruminococcaceae  
TACGTAGGGAGCGAGCGTTGTCCGGAATTTACTGGGTGTAAGGGGCGTGTAGGCGGAGCTGCAAGTCAAGTGTGAAATCTG  
GGGGCTTAACCCCAAAGTGCATTTGAAACTGTAGCCCTTGTAGTATCGGAGAGGCGAGCGGAATTCTAGTGTAGCGGTG  
AATGCTTAGATATCGGAAGAAGTCCGATTGCGAAGGCAGCTGCTAAGCTGCAACTGACATTGAGGCTCGAAAGTGTG  
GGTAT  
>ASV:5985:Family:Veillonellaceae  
TACGTAGGTGGCAAGCGTTGTCCGGAATGATTGGGCGTAAAGGGGAGCGCAGGTTGGGCAATCAAGTCTGTTTTAAAAGTGC  
GGGGCTCAACCCCGTATGAGGGAACAGAACTGGATGTCTTGTAGTGCAGGAGAGGTAAGTGAATTCTAGTGTAGCGGTGA  
AATGCGTAGATATTAGGAGGAACACCAGTGGCGAAGGCAGCTTACCAAATATATCTGACGTTGAGGCACGAAAGCGTGG  
GGAGC  
>ASV:5986:Genus:Pseudoflavonifractor  
TACGGAGGATCCGAGCGTTATCCGGAATTTACTGGGTGTAAGGGGCGTGTAGGTGGGACTGCAAGTCAAGTGTGAAAATTA  
TGGGCTCAACCCATAAAGTGCATTTGAAACTGTAGTTCTTGTAGTGCAGGAGGCAATCGGAATTCCGTGTGTAGCGGTG  
AATGCTTAGATATCACGAAGAAGTCCGATTGCGAAGGCAGCTCACTGGACTGCGACTGACACTGATGCTCGAAAGTGTG  
GGTAT  
>ASV:5987:Genus:Bacteroides  
TACGTATGGTGAAGCGTTATCCGGAATTTACTGGGTGTAAGGGGAGCGTAGACGGATGGGCAAGTCTGATGTGAAAACCC  
GGGGCTCAACCGTAAATGCAAGTGTACTGTGACTGCTTGTAGTACAGTAGAGGTGGGCGGAATTCTGGTGTAGCGGTG  
AATGCTTAGATATCACGAAGAAGTCCGATTGCGAAGGCAGCTTACTGGACTGCAACTGACACTGATGCTCGAAAGTGTG  
GGTAT  
>ASV:5988:Family:Lachnospiraceae  
TACGGAGGATCCGAGCGTTATCCGGAATTTACTGGGTGTAAGGGGAGCGTAGACGGTTTTGCAAGTCTGAAGTAAAAGCCC

GGGGCTTAACCCGGGACTGCTTTGGAACTGCCCGTCTTGTAGTGCCGGAGAGGTAAGTGAATTCCTAGTGTAGCGGTG  
AAATGCGTAGATATTAGGAGGAACACCAGTGGCGAAGGCGGCTTACTGGACGATAACTGACGCTGAGGCTCGAAAGCGTG  
GGGAG

>ASV:5989:Class:Bacteroidia

TACGGAGGATCCGAGCGTTATCCGGATTTATTGGGTTTAAAGGGAGCGTGGGCGGATTATTAAGTCAGTTGTGAAAGTTT  
GCGGCTCAACCGTAAATTCAGTTGATACTGGTAGTCTTGTAGTGACAGAGGTTAGCGGGAATTCAGGTGTAGGAGTG  
AAATCCGTAGATATCTGGAAGAACATCAGTGGCGAAGGCGGCTGTCTGGACCGTATTGACGCTGAGGCTCGAAAGCATG  
GGTAG

>ASV:5990:Kingdom:Bacteria

TACGTAGGGGGCAAGCGTTGTCCGGATTTACTGGGTGTAAGGGCGCGCAGGCGGGAGAGCAAGTCAGATGTGAAATCTA  
TGGGCTTAACCCATAAACTGCATTTGAAACTGTTTTCTTGTAGTAATGGAGGGGGAACCGGAATTCCTGGTGTAGCAGTG  
AAATGCGTAGATATCGAGAGGAACACTCGTGGCGAAGGCGGTTCTTGGACATTAAGTCAGGCTGAGGCACGAAGGCCAG  
GGGAG

>ASV:5991:Family:Lachnospiraceae

TACGTATGGAGCAAGCGTTATCCGGATTTACTGGGTGTAAGGGAGCGTAGACGTTTTGTCAAGTCTGATGTGAAATTC  
AGGGCTTAACCTGGACCTGCATTGAAACTGTGCAACTAGAGTGTGGAGAGGTGAGTGAATTCCTAGTGTAGCGGTG  
AAATGCGTAGATATTAGGAGGAACACCAGTGGCGAAGGCGGCTTCTGGACATTAAGTCAGGCTGAGGCTCGAAAGCGTG  
GGGAG

>ASV:5992:Order:Clostridiales

TACGTAGGGGGCAAGCGTTGTCCGGATTTACTGGGCGTAAAGGGTGCCTAGGCGGCTTACAAGTTGGATGTGAAATCCC  
CGTGCTTAACATGGGAACTGCATCCAAAACCTTAGGGCTTGTAGTGTGGAAAGAGGTAAGTGAATTCCTAGTGTAGCGGTG  
AAATGCGTAGATATTGGGAGGAACACCAGTGGCGAAGGCGACTTACCAAATATATCTGACGTTGAGGCACGAAGCGTG  
GGGAG

>ASV:5993:Class:Deltaproteobacteria

TACGTAGGGGGCAAGCGTTATCCGGATTTACTGGGTGTAAGGGTGCCTAGGCGGCACAGCAAGTCAGATGTGAAAGACC  
GGGGCTCAACCCGGGGCTGCATTTGAAACTGCCGAGCTTGAATCCGGGAGAGGGTGGCGGAATTCAGGTGTAGGAGTG  
AAATCCGTAGATATCTGGAGGAACATCAGTGGCGAAGGCGGCACCTGGACCGTATTGACGCTGAGGTGCGAAAGCGTG  
GGGAG

>ASV:5994:Family:Ruminococcaceae

TACGTAGGGAGCAAGCGTTGTCCGGATTTACTGGGTGTAAGGGTGCCTAGGCGGCTTGTCAAGTCAGATGTGAAATCTA  
TGGGCTCAACCCATAAACTGCTTTCAAACCTGTTTTCTTGTAGTGTGCAAGAGGTAAGTGAATTCCTAGTGTAGCGGTG  
GAATGCTTAGAGATCATACAGAACACCGATTGCGAAGGCAGCTTACCAAATATATCTGACGCTGATGCTCGAAAGTGTG  
GGTAT

>ASV:5995:Family:Ruminococcaceae

TACGTAGGGAGCAAGCGTTGTCCGGATTTACTGGGTGTAAGGGTGCCTAGGCGGCTTGTCAAGTCAGATGTGAAATCCA  
TGGGCTTAACCCATGAAGTGTCTTTGAAACTGATTTCTTGTAGTACTGGAGAGGCAATCGGAATTCCTAGTGTAGCGGTG  
AAATGCGTAGATATTGGGAGGAACACCAGTGGCGAAGGCGCCTTCTGGACTGTGCTGACGCTGAGATGCGAAAGCCAG  
GGTAG

>ASV:5996:Genus:Christensenellaceae\_R-7\_group

TACGTAGGGGGCAAGCGTTGTCCGGAAATAATTGGGCGTAAAGGGCGCGTAGGCGGCTCGGTAAGTCTGGAGTAAAAGTCC  
TGCTTTCAAGGTGGGAGTGTCTTTGGAGACTGGAGAGCTTGTAGTGCAGGAGAGGTAAGTGAATTCCTAGTGTAGCGGTG  
GAATGCGTAGATATCGGGAGGAACACCAGTGGCGAAGGCGGCTTACTGGGCACCAACTGACGCTGAGGCTCGAAAGTGTG  
GGGAG

>ASV:5997:Family:Clostridiaceae\_1

TACGTAGGTGGCGAGCGTTATCCGGATTTACTGGGCGTAAAGGGAGCGTAGGCGGATGATTAAGTGGGATGTGAAATACC  
CGGGCTCAACTTGGGTGCTGCATTTCAAACCTGGTTATCTAGAGTGCAGGAGAGGAGAGTGAATTCCTAGTGTAGCGGTG  
AAATGCGTAGATATTAGGAGGAACATCAGTGGCGAAGGCGGCTTACTGGGCTTAACTGACGCTGAGGCTCGAAAGCGTG  
GGGAG

>ASV:5998:Family:Ruminococcaceae

TACGGAGGATCCGAGCGTTATCCGGATTTACTGGGTGTAAGGGCGTGTAGGCGGGATTGCAAGTCAGATGTGAAAACCA  
CGGGCTCAACCTGTGGCCTGCATTTGAAACTGCAGTCTTGTAGTGCAGGAGAGGAAAGCGGAATTCCTAGTGTAGCGGTG  
AAATGCGTAGATATTAGGAGGAACACCAGTGGCGAAGGCGGCTTCTGGACTGTAAGTCAGGCTGAGGTACGAAAGCGTG  
GGGAG

>ASV:5999:Family:Lachnospiraceae

TACGGAGGATCCAAGCGTTATCCGGATTTATTGGGTGTAAGGGAGCGTAGACGGCTGTGCAAGTCTGAAGTGAAGGCA  
TGGGCTCAACCTGTGGACTGCTTTGAAACTGTGAGCTAGAGTGTGGAGAGGTAAGTGAATTCCTAGTGTAGCGGTG  
AAATGCTTAGATATACGAAGAACCTCCGATTGCGAAGGCAGCTTACTGGACTGTAAGTCAGGCTGAGGCTCGAAAGCGTG  
GGGAG

>ASV:6000:Genus:Patulibacter

TACGTAGGGCGCAAGCGTTGTCCGGATCATTGGGCGTAAAGCGCGTGTAGGCGGCCAGGTAAGTCTGCTGTGAAAGTCC  
AGGGCTCAACCTGGGATGCCGGTGGATACTGCTTGGCTAGAGTCTGGAAGGGGCGAGTGAATTCCTGGTGTAGCGGTG  
GAATGCGCAGATATCAGGAGGAACACCTATGGCGAAGGCAGCTCGCTGGGACAGTACTGACGCTGAGACGCGAAAGCGTG  
GGGAG

>ASV:6001:Order:Bacteroidales

TACGGAGGATCCAAGCGTTATCCGGATTTATTGGGTTTAAAGGGAGCGTAGATGGATGTTTAAAGTCAGTTGTGAAAGTTT  
GCGGCTCAACCGTAAATTCAGTTGATACTGGCTGTCTTGTAGTACAGGAGAGGCAGGCGGAATTCCTAGTGTAGCGGTG  
AAATGTGTAGATATTAGGAGGAACACCAGTGGCGAAGGCGGCTTCTGGACAGTAACTGACGTTAGGCTCGAAAGTGTG  
GGTAT

>ASV:6002:Family:Ruminococcaceae  
TACGGAAAGGTCGGGGGTTATCCGGATTTATTGGGTTAAAGGGAGCGTAGGTGGATTGTTAAGTCAGTTGTGAAAGTTT  
GCGGCTCAACCACTGGCCTGCATTTGAAACTGTTTTCTTGAGTGATGGAGAGGCAGCGGGAATTCCTGTGTAGCGGTG  
AAATGCGTAGATATACGGAGGAACACCAAGTGGCGAAGGCGGCTGCTGGACATTAACGTGACGCTGAGGCTCGAAAGTGTG  
GGTAG

>ASV:6003:Genus:Bacteroides  
TACGGAGGATGCGAGCGTTATCCGGATTTATTGGGTTAAAGGGAGCGTAGGTGGACATGTAAGTCAGTTGTGAAAGTTT  
GCGGCTCAACCGTAAATTTGAACTGGCACTGGCACTTGGAACTGCATCTTGGAGTACGCACAAAGTGGGCGGAATTCGTGGTGTAGCGGTG  
AAATGCTTAGATATACGAAGAACCCGATTGCGAAGGCAGCTCACTGGAGGCAACTGACGCTGAAGCTCGAAAGTGTG  
GGTAG

>ASV:6004:Genus:Ruminiclostridium\_5  
AACGTAGGTCACAAGCGTTGTCCGGATTTACTGGGTGTAAGGGTGCCTAGGCGGATTGGCAAGTCAGAAGTGAATCCA  
TGGGCTTAACCCATGAACCTGCATTTGAAACTGCAGAGCTTGGAGTGAAGTAGAGGTAGGCGGAATTCCTGGTGTAGCGGTG  
AAATGCGTAGATATAACTTAGAACTCCGATAGCGAAGGCAGCTTACCAGACTGTAACGTGACGCTGATGCACGAGAGCGTG  
GGTAT

>ASV:6005:Phylum:Firmicutes  
AACGTAGGGTGAAGCGTTGTCCGGATTTACTGGGTGTAAGGGAGCGCAGGCGGACC GGCAAGTTGGAAGTGA AAACTA  
TGGGCTCAACCCATGAACCTGCATTTGAAACTGCAGAGCTTGGAGTACC GGAGAGGTAAGCGGAATTCCTAGTGTAGCGGTG  
AAATGCGTAGATATTAGGAAGAACCAATGGCGAAGGCAGGTCTCTGGGCCTTACTGACGCTGAGGAGCGAAAGCGTG  
GGGAG

>ASV:6006:Family:Ruminococcaceae  
TACGGAGGATCGAGCGTTATCCGGATTTATTGGGTTAAAGGGAGCGTAGGCGGCTTTGCAAGTCAGATGTGAAATCTA  
TGGGCTCAACCCATGAACCTGCATTTGAAACTGCAGAGCTTGGAGTGAAGTAGAGGCAGGCGGAATTCCTGGTGTAGCGGTG  
AAATGCGTAGATATTGGGTAGAACACCAAGGCGAAGGCGGCTACTGGGCATTGATTGACGCTGAGGCACGAAAGCATG  
GGGAT

>ASV:6007:Family:Ruminococcaceae  
AACGTAGGGTACAAGCGTTGTCCGGATTTACTGGGTGTAAGGGAGCGCAGGCGGACC GGCAAGTCAGATGTGAAATCTG  
GAGGCTTAACCCATGAACCTGCATTTGAAACTGCAGAGCTTGGAGTACC GGAGAGGTTATCGGAATTCCTTGTGTAGCGGTG  
AAATGCGTAGATATCGGGAGGAACACCAAGTGGCGAAGGCGGCTACTGGGCACCAACTGACGCTGAGGCTCGAAAGTGTG  
GGTAG

>ASV:6008:Order:Bacteroidales  
AACGTAGGTCACAAGCGTTGTCCGGATTTACTGGGTGTAAGGGAGCGCAGGCGGGAAGACAAGTTGGAAGTGAATCCA  
TGGGCTCAACCCATGAACCTGCATTTGAAACTGCAGGCTTGGAGTCTGCACAGGGCACATGGAATTCGTGGTGTAGCGGTG  
AAATGCTTAGATATACGAAGAACCCGATTGCGAAGGCAGCTTACTGGATTGTAACGTGACGCTGATGCTCGAAAGTGTG  
GGTAT

>ASV:6009:Family:Lachnospiraceae  
TACGGAAAGATGCGAGCGTTATCCGGATTTATTGGGTGTAAGGGAGCGTAGACGGAGTGGAAGTCTGATGTGAAAACCC  
GGGGCTCAACCCCGGGCTGCCACTGATACTGTTAACTTGGATGGAAGAGGAGAATGGAATTCCTAGTGTAGCGGTG  
AAATGCGTAGATATTAGGAGGAACACCAAGTGGCGAAGGCGGCTACTGGGCCAAGACTGACGCTGAGGCGGAAAGCGTG  
GGGAG

>ASV:6010:Family:Burkholderiaceae  
TACGTATGGAGCAAGCGTTATCCGGATTTACTGGGTGTAAGGGAGCGCAGGCGGTTGAGTAAGACAGATGTGAAATCCC  
CGAGCTTAACCTCGGGAATGGCATATGTGACTGCTCGACTAGAGTGTGTGAGAGGAGGTGGAATTCACGCTGTAGCAGTG  
AAATGCGTAGAGATGGGGAGGAACACCAAGTGGCGAAGGCGGCTGCTGGGCTTAACTGACGCTGAGGCACGAAAGCATG  
GGGAT

>ASV:6011:Genus:Gordonibacter  
TACGTAGGGGGCGAGCGTTATCCGGATTTACTGGGCTAAAGCGCGCTAGGCGGCCCTCAAGCGGAACCTTAACCCG  
AGGGCTCAACCCCGGTGCGGTTCCGAACTGGCAGGCTCGAGCTTGGTAGAGGAAGTGAATTCCTGGTGTAGCGGTGG  
AATGCGCAGATATCGGAAGAACACCGATGGCGAAGGCAGTCTCTGGGCCATCAACTGACGCTGAGGCGGAAAGCTGG  
GGGAG

>ASV:6012:Family:Ruminococcaceae  
TACGGAGGATCCGAGCGTTATCCGGATTTACTGGGTGTAAGGGAGCGTAGGCGGGACGGAAGTCAGATGTGAAAACCTA  
TGGGCTCAACTCATAGACCGCATTTGAAACTGTTGTTCTTGGATGATCGGAGAGGCAATCGGAATTCCTAGTGTAGCGGTG  
AAATGCGTAGATATTAGGAGGAACACCAAGTGGCGAAGGCGGATTGCTGGACGACAACGTGACGCTGAGGCGGAAAGCGTG  
GGGAG

>ASV:6013:Genus:Parabacteroides  
TACGGAGGATGCGAGCGTTATCCGGATTTATTGGGTTAAAGGGTGCCTAGGTTGTTTTTAAAGTCAGCGGTGAAAGTTT  
GTGGCTCAACCATAAAATTGCCGTTGAACTGGAAGACTTGGAGTGTGTTTGGAGTAGGCGGAATGCGTGGTGTAGCGGTG  
AAATGCATAGAGATGGGGAGGAGCACAGCGGCGAAGGCGGCTGCTGGGCTGTAACGTGACGCTGAGGCACGAAAGCGTG  
GGTAG

>ASV:6014:Family:Lachnospiraceae  
TACGTAGGGGGCAAGCGTTATCCGGATTTACTGGGTGTAAGGGGGCGCAGACGGCAATGCAAGCCAGGAGTGAAGGCC  
GGGGCCCAACCCGGGACTGCTTGGAACTGCATGGCTGGAGTGCAGGAGGGGCGAGGCGGAATTCCTAGTGTAGCGGTG  
AAATGCGTAGATATTAGGAGGAACACCGTGGCGAAGGCGGCTGCTGGACTGCGACTGACGTTGAGGCCCGAAAGCGTG  
GGGAG

>ASV:6015:Family:Ruminococcaceae  
TACGTAGGTGGCAAGCGTTGTCCGGATTTACTGGGTGTAAGGGCGGTGAGCGGGAAGGCAAGTCAGATGTGAAATCCA  
CGGGCTCAACTCATAGACTGCATTTGAAACTGTTGTTCTTGGAGTGGAGTAGAGGTAAAGCGGAATTCCTGGTGTAGCGGTG

AAATGCGTAGAGATCAGGAGGAACACCAGTGGCGAAGGCGGCTACTGGGCTTTAACTGACGCTGAGGCACGAAAGCGTG  
GGTAG  
>ASV:6016:Family:Ruminococcaceae  
TACGTAGGTGACAAGCGTTGTCCGGATTTACTGGGTTAAAGGGAGCGTAGGTGGATTGTTAAGTCAGTTGTGAAAGTTT  
GCGGCTCAACCATGGGACCGCATTGAAAAGTGTCTACTTGGATATCGGAGAGGCAGGCGGAATTCCTAGTGTAGCGGTG  
AAATGCGTAGATATTAGGAGGAACACCAGTGGCGAAGGCGGCTGCTGGACGACAACGACGCTGAGGCTCGAAAGCGTG  
GGGAG  
>ASV:6017:Kingdom:Bacteria  
TACGTAGGGGGCAAGCGTTATCCGGATTTACTGGGTGTAAGGGGCTCGTAGGCGGCATATTAAGTTAGATGTGAAATCCC  
CGGGCTTAACCTGGGCGTTGCATTTAAAAGTATAAGCTTGGAGTCCGGAGAGGAAAGCGGAATTCCTAGTGTAGCGGTG  
AAATGCTTAGATATCACGAAGAACTCCGATTGCGAAGGCAGCCTGCTAAGCTGCAACTGACATTGAGGCTCGAAAGTGTG  
GGTAT  
>ASV:6018:Kingdom:Bacteria  
TACGGAGGATCCGAGCGTTATCCGGATTTATTGGGTTAAAGGGTGCAGTGGCGGCCCTTAAGTCAGCGGTGAAAGTCT  
GTGGCTCAACCATAGAATTGCCGTTGAAAGTGGGAGGCTTGGATGTTTGGAGTAAGCGGAATTCCTAGTGTAGCGGTG  
AAATGCGTAGATATTAGGAGGAACACCAGTGGCGAAGGCGGCTTACTGGACGTAACGACGTTGAGGCTCGAAAGCGTG  
GGGAG  
>ASV:6019:Family:Lachnospiraceae  
TACGTATGGTGACGCGTTATCCGGATTTACTGGGTGTAAGGGAGCGCAGGCGGAGGGCTAAGTCTGATGTGAAAGCCC  
GGGGCTCAACCGCGGACTGCTTTTGAAGTGTCTGCTAGAGTGCAGGAGAGGTAAGTGAATTCCTAGTGTAGCGGTG  
AAATGCGTAGATATTAGGAGGAACACCAGTGGCGAAGGCGGCTTACTGGACGATAACTGACGCTGAGGCTCGAAAGCGTG  
GGGAG  
>ASV:6020:Genus:Bacteroides  
TACGTAGGGAGCGAGCGTTGTCCGGAATTTACTGGGTGTAAGGGAGCGTAGGTGGACAGTTAAGTCAGTTGTGAAAGTTT  
GCGGCTCAACCGTAAAATTGCAGTTGATACTGGCTGTCTTGGATACAGTAGAGGTGGGCGGAATTCCTGGTGTAGCGGTG  
AAATGCTTAGATATCACGAAGAACTCCGATTGCGAAGGCGGATTGCTGGACGATAACTGACGCTGAGGCGCGAAAGTGTG  
GGGAG  
>ASV:6021:Family:Lachnospiraceae  
TACGGAGGATCCGAGCGTTATCCGGATTTATTGGGTTAAAGGGAGCGTAGATGGATGTTAAGTCAGTTGTGAAAGTTT  
GCGGCTCAACCCCGGACTGCTTTTGAAGTGTCTGCTAGAGTGCAGGAGAGGTAAGTGAATTCCTAGTGTAGCGGTG  
AAATGCGTAGATATTGGGAGGAACACCAGTGGCGAAGGCGGCTTACTGGACTGCAACTGACACTGATGCTCGAAAGTGTG  
GGTAT  
>ASV:6022:Family:Lachnospiraceae  
TACGGAGGATCCGAGCGTTATCCGGATTTATTGGGTTAAAGGGAGCGTAGGTGGTATGGCAAGTCAGAAGTGAACCC  
AAGGCTTAACCATGGGAATGCTTTTGAAGTGTCTGACTAGAGTGTGGAGGGTAAGTGAATTCCTAGTGTAGCGGTG  
AAATGCGTAGATATTAGGAGGAACACCAGTGGCGAAGGCGGCTTACTGGACGTAACGACACTGAGGCTCGAAAGCGTG  
GGGAG  
>ASV:6023:Family:Ruminococcaceae  
TACGTAGGTGGCAGCGTTATCCGGATTTACTGGGTGTAAGGGAGCGTAGGCGGGATCGCAAGTCAGATGTGAAAACCTA  
TGGGCTTAACCCATAAAGTGCATTTGAAAGTGTGGTCTTGGAGTGTGGAGAGGTTGACGGAATTCCTAGTGTAGCGGTG  
AAATGCGTAGATATTAGGAGGAACACCAGTGGCGAAGGCGGCTTACTGGGCTTTAACTGACGCTGAGGCTCGAAAGCGTG  
GGGAG  
>ASV:6024:Family:Lachnospiraceae  
TACGGAGGATCCGAGCGTTATCCGGATTTATTGGGTTAAAGGGAGCGTAGACGGCGATGCAAGCCAGATGTGAAAGCCC  
GGGGCTCAACCTGGGACTGCATTTGAAAGTGCCTGGCTGGAGTGTGGAGAGGCAGGCGGAATTCCTAGTGTAGCGGTG  
AAATGCGTAGATATTAGGAAGAACACCAGTGGCGAAGGCGACTTCTGGACGAAAACGACGCTGAGGCGCGAAAGCCAG  
GGGAG  
>ASV:6025:Family:Lachnospiraceae  
TACGGAGGATCCGAGCGTTATCCGGATTTACTGGGTGTAAGGGAGCGTAGACGGCCGTGCAAGTCTGAAGTGAAGGCA  
TGGGCTCAACCTGTGGACTGCTTTGAAAGTGTGAGCTAGAGTGTGGAGAGGTAAGTGAATTCCTGGTGTAGCGGTG  
AAATGCATAGATATCACGCAGAAGTCCGATTGCGAAGGCGACTTACTAACTATAACTGACACTGAAGCACGAAAGCGTG  
GGGAG  
>ASV:6026:Family:Ruminococcaceae  
TACGTAGGTGGCAAGCGTTGTCCGGATTTACTGGGTGTAAGGGGCGTAGCCGGGAAGGCAAGTCAGATGTGAAATCCA  
CGGGCTTAACCTCGTGAAGTGCATTTGAAAGTGTATTTCTTGGAGTACTGGAGAGGCAATCGGAATTCCTAGTGTAGCGGTG  
AAATGCGTAGATATTAGGAGGAACACCAGTGGCGAAGGCGGCTCTCTGGTCTGTAACGACACTGATGCTCGAAAGTGGC  
GGTAT  
>ASV:6027:Family:Ruminococcaceae  
TACGTAGGTGGCAAGCGTTGTCCGGATTTACTGGGTGTAAGGGTGCAGTGGCGGGGAAAGCAAGTCAGATGTGAAATCCC  
GGGGCTCAACCCCGGGCTGCATTTGAAAGTGTCTTCTTGGAGTGAAGTAGAGGCAGGCGGAATTCCTAGTGTAGCGGTG  
AAATGCGTAGATATTAGGAGGAACACCAGTGGCGAAGGCGGCTGCTGGACTGTTACTGACACTGAGGCACGAAAGCGTG  
GGGAG  
>ASV:6028:Order:Clostridiales  
TACGGAGGATCCGAGCGTTATCCGGATTTACTGGGTGTAAGGGGCGTAGCCGGGAAGGCAAGTCAGATGTGAAATCCA  
CGGGCTCAACCTCGTGAAGTGCATTTGAAAGTGTCTTCTTGGAGTACTGGAGAGGCAATCGGAATTCCTAGTGTAGCGGTG  
AAATGCTTAGATATCACGAGGAAGTCCGATCGCGAGGCATTGTACCGGGTGCAACTGACGCTGAGGCTCGAAAGTGGC  
GGTAT  
>ASV:6029:Family:Fusobacteriaceae

TACGTAGGGAGCGAGCGTTATCCGGATTTACTGGGTGTAAAGGGAGCGCAGGCGGTGCGGCAAGTCTGATGTGAAAGCCC  
GGGGCTCAACCCCGGTACTGCATTGAAAAGTGTCTACTAGAGTACTGGAGAGGTGGGCGGAACTACAAGTGTAGAGGTG  
AAATTCGTAGATATTTGTAGGAATGCCGATAGAGAAGTCAGTCTACTGGACAGATACTGACGCTGAAGCGCAAAGCATG  
GGGAG

>ASV:6030:Genus:Odobacter

TACGGAGGATGCGAGCGTTATCCGGATTTATTGGGTTAAAGGGTGCCTAGGCGGCTTTATAAGTTAGTGGTAAAATTC  
GGAGCTTCACTCCGGTCCGCCATTAAGTGTAGAGCTAGAGAATGGACGAGGTAGGCGGAAATAGTTAAGTAGCGGTGA  
AATGCATAGATATAACTTAGAACTCCGATAGCGAAGGCGCTTACCAGACCATAACTGACGCTGATGCACGAGAGCGTGG  
GTATC

>ASV:6031:Phylum:Firmicutes

TACGGAAAGTCCAGGCGTTATCCGGATTTATTGGGTTAAAGGGAGCGCAGGCGGTTTGATAAGTCTGAAGTTAAAGGCT  
GTGGCTCAACCATAGTTCGCTTTGAAAAGTGTCAAATTTAGTGCAGAAGGGGAGAGTGGAAATCCCGGTGTAGCGGTGG  
AATGCGTAGATATCGGGAGGAACACCAGTGGCGAAGGCGGCTTACTGGGACCAACTGACGCTGAGGCTCGAAAAGTGTGG  
GTAGC

>ASV:6032:Phylum:Firmicutes

TACGTAGGTGGCGAGCGTTATCCGGAAATTATTGGGCTAAAGAGGGAGCAGGCGGCACTGCAAGTCTGAAGTAAAGCCC  
GGGGCTCAACCCGGGACTGCTTTGAAAAGTGTAGAGCTAGAGTGTGGAGAGGCAAGCGGAAATCCTAGTGTAGCGGTG  
AAATGCGTAGATATTGGGAGGAACACCAGTGGCGAAGGCGGCTTTCTGGACTGTGTCTGACGCTGAGATGCGAAAAGCCAG  
GGTAG

>ASV:6033:Order:Clostridiales

TACGTATGGTGAAGCGTTATCCGGATTTACTGGGTGTAAAGGGTGCCTAGGTGGCAGTGAAGTCAAGTGTGAAATACC  
CGGGCTTAACCCGGGGGCTGCATCTGATACTGCAGACTTGAAGTGCAGGAGAGGAAAGCGGAAATCCTAGTGTAGCGGTG  
AAACGCGTAGAGATTAGGAGGAACACCAGTGGCGAAGGCGGCTTTCTGGACTGTGTCTGACGCTGAGGTACGAAAAGCGTG  
GGGAG

>ASV:6034:Family:Ruminococcaceae

TACGTGGGTGGCGAGCGTTATCCGGATTTACTGGGTGTAAAGGGCGCGTAGGCGGGAATGCAAGTCAAGTGTGAAATCCA  
AGGGCTCAACCTTGAAGTGCATTTGAAAGTGTGAGCTAGAGTGTGGAGAGGCAAGTGGAAATCCTAGTGTAGCGGTG  
AAATGCGTAGAGATTGGGAGGAACACCAGTGGCGAAGGCGGCTTCTGGGCTTAACTGACGCTGAGGCACGAAAAGCGTG  
GGTAG

>ASV:6035:Genus:UBA1819

TACGTAGGGTGAAGCGTTGTCCGGAAATTACTGGGTGTAAAGGGAGCGCAGGCGGATTGGCAAGTTGGGAGTGAATCTA  
TGGGCTCAACCCATAAATTGCTTTCAAAGTGTGAGTGTAGAGGTAGGCGGAAATGCGTGGTGTAGCGGTG  
AAATGCATAGATATCACGAGAACTCCGATTGCGAAGGCGAGCTTACTAAACCATAACTGACACTGAAGCACGAAAAGCGTG  
GGGAG

>ASV:6036:Genus:Lactobacillus

TACGTAGGTGGCAAGCGTTATCCGGATTTATTGGGCGTAAAGCGAGCGCAGGCGGTTGCTTAGGTCTGATGTGAAAGCTT  
TCGGCTTAACCGAAGAGTGCATCGGAAACCGGGCGACTTGAAGTGCAGAAGAGGACAGTGGAACTCCATGTGTAGCGGTG  
GAATGCGTAGATATATGGAAGAACACCAGTGGCGAAGGCGGCTTCTGGTCTGCAACTGACGCTGATGCTCGAAAAGTGTG  
GGTAT

>ASV:6037:Family:Lachnospiraceae

TACGTATGGTGAAGCGTTATCCGGATTTACTGGGTGTAAAGGGTGCCTAGGTGGTATGGCAAGCCAGAAGTGAAGAACCC  
AGGGCTTAACCTGGGACTGCTTTTGAAGTGTGAGACTGGAGTGCAGGAGAGGTAAGCGGAAATCCTAGTGTAGCGGTG  
AAATGCTTAGAGATACACAGAACACCAGTGGCGAAGGCGGCTTACCAACTATATCTGACGTTGAGGCACGAAAAGCGTG  
GGGAG

>ASV:6038:Genus:Cuneatibacter

TACGGAGGATTCAAGCGTTATCCGGATTTATTGGGTTAAAGGGTGCCTAGGCGGTTTGATAAGTTAGAGTGAATCCC  
GGGGCTTAACCTGGGACTGCTTTTGAAGTGTGAGACTGGAGTGCAGGAGAGGTAAGCGGAAATCCTAGTGTAGCGGTG  
AAATGCGTAGATATTAGGAGGAGCACAGTGGCGAAGGCGGCTTACTGGACGTTGAATGACGCTGAGGCTCGAAAAGCGTG  
GGGAG

>ASV:6039:Family:Ruminococcaceae

TACGTAGGTGGCGAGCGTTATCCGGAAATTATTGGGTGTAAAGGGTGCCTAGGCGGATGTAAGTCAAGTGTGAAATGCC  
GCGGCTCAACCCGGAGCTGCATTTGAAACTTATGTTCTTGAAGTGAAGTGAAGGTAAGCGGAAATCCTAGTGTAGCGGTG  
AAATGCGTAGATATTAGGAGGAACACCAGTGGCGAAGGCGGCTTACTGGACGATAACTGACGCTGAGGCTCGAAAAGCGTG  
GGGAG

>ASV:6040:Genus:Ruminococcaceae\_UCG-013

TACGTAGGTGACAAGCGTTGTCCGGATTTACTGGGTGTAAAGGGCGCGTAGGCGGACTGTCAAGTCAAGTGTGAAATACC  
GGGGCTTAACCCGGGGCTGCGATTGAAACTGACAGCCTTGAAGTGTGAGGAGGTAAGCGGAAATCCTAGTGTAGCGGTG  
GAATGCGTAGATATCGGGAGGAACACCAGTGGCGAAGGCGGCTTACTGGGACCAACTGACGCTGAGGAGCGAAAAGCGTG  
GGGAG

>ASV:6041:Family:Clostridiaceae\_2

TACGTATGGTGAAGCGTTATCCGGATTTACTGGGTGTAAAGGGTGCCTAGGTGGTCTTAAAGTCAAGTGTGAAAGGCT  
ACGGCTCAACCGTAGTAAGCCTTTGAAACTGGGAACTTGAAGTGTGAGGAGAGGAGAGTGGAAATCCTAGTGTAGCGGTG  
AATGCGTAGATATCACGAGAACTCCGATTGCGAAGGCGAGCTTACTAAACCATAACTGACACTGAAGCACGGAAGCGTGG  
GGATC

>ASV:6042:Phylum:Firmicutes

TACGTAGGGAGCGAGCGTTGTCCGGAAATTACTGGGTGTAAAGGGAGCGCAGGCGGTTGCGGCAAGTCTGAAGTAAAGCCC  
GGGGCTTAACCCGGGACTGCTTTGAAAAGTGTAGGACTAGAGTACAGGAGAGGAAAGCGGAAATCCTAGTGTAGCGGTG  
AAATGCGTAGAGATTAGGAAGAACACCAGTGGCGAAGGCGACTTTCTGGACGAAAAGTGAAGTGTAGGCGGAAAAGCGTG

GGGAG  
>ASV:6043:Family:Ruminococcaceae  
TACGTAGGGGGCAAGCGTTATCCGGATTACTGGGTGTAAGGGAGCGTAGACGGTGTGGCAAGTCTGATGTGAAAGGCA  
TGGGCTCAACCCATGAATTGCTTTCAAACCTGTTTTCTTGAGTAGTGCAGAGGTAGCGGGAATCCCGGTGTAGCGGTG  
GAATGCGTAGATATCGGGAGGAACACCAATGGCGAAGGCAGGTCTCTGGCCGTCACGTACGCTGAGGAGCGAAAGCGTG  
GGGAG  
>ASV:6044:Genus:Methanobrevibacter  
TACGTAGGGTGCAGCGTTATCCGGAAATTATTGGGCTAAAGCGTCCGTAGCCGGTTTAAATAAGTCTCTGGTGAATCCT  
GCAGCTTAACCTGTTGGGAATTGCTGGAGATACTATTAGACCTGAGATCGGGAGAGGTTAGAGGTACTCCAGGGTAGAGGT  
GAAATCTGTAATCCTGGGAGGACCGCTGTTGCGAAGGCGTCTGACTGGAACGATTCTGACGGTGAGGGACGAAAGCTA  
GGGGC  
>ASV:6045:Family:Veillonellaceae  
TACGTAGGTGGCAAGCGTTGTCCGGAAATTATTGGGCTAAAGCGCGCAGGCGGCTTCTTAAGTCCATCTTAAGAGTGC  
GGGGCTTAACCCCGTGTAGGGATGAAACTGGGAGGCTGGAGTATCGGAGAGGAAAGTGGAAATCCTAGTGTAGCGGTGA  
AATGCTTAGATATCACGAAGAACTCCGATTGCGAAGGCAGCTCACTGGACTGCAACTGACACTGATGCTCGAAAGTGTGG  
GTATC  
>ASV:6046:Genus:Lactonifactor  
TACGGAGGATCCGAGCGTTATCCGGATTTACTGGGTGTAAGGGAGCGTAGACGGAGAGGCAAGTCTGATGTGAAAACCC  
GGGGCTCAACCCCGGACTGCATTGAAACTGTTTTCTAGAGTGTCCGGAGAGGTAAGTGGAAATCCTAGTGTAGCGGTG  
AATGCGTAGATATCACGAAGAACTCCGATTGCGAAGGCAGCTGCTAAGCTGCAACTGACATTGAGGCTCGAAAGTCTG  
GGTAT  
>ASV:6047:Genus:Erysipelatoclostridium  
TCCTTCTTTTCCCTCTTTCTCCTTCTTTCTTTTCTTAAAGAGGGAGCAGGCGGCAGCAAGGCTGTGGTGAAGCCT  
GAAGCTTAACCTCAGTAAGCCATAGAAACCAGGCAGCTAGAGTGCAGGAGAGGATCGTGGAAATCCTAGTGTAGCGGTGA  
AATGCGTAGATATACGGAGGAACACCACTGGCGAAGGCGGATTACTGGACAGTAACTGACGCTGAGGCGCGAAAGCGTGG  
GGAGC  
>ASV:6048:Genus:Akkermansia  
TACCTCTTTTCCCTCTTTTCTTCCCTTTTCTTCCCTCTTGGCTAGGCTGTTTCGTAAGTCTGTGTGAAAGGCG  
CGGGCTCAACCCCGGACGGCACATGATACTGCGAGACTAGAGTAATGGAGGGGAACCGGAATCCTCGGTGTAGCAGTG  
AAATGCGTAGATATCGAGAGGAACACTCGTGGCGAAGGCGGTTCTGGACATTAAGTACGCTGAGGCACGAAAGGCCAG  
GGGAG  
>ASV:6049:Genus:Phoceia  
TACGTAGGGAGCGAGCGTTGTCCGGAAATTACTGGGTGTAAGGGAGCGTAGGCGGGTCTCAAGTCCAATGTTAAATCTA  
CCGGCTCAACTGGTAGTGCCTTCCGAAACTGGGGCTCTTGAGTGAAGTAGAGGCAGGCGGAATCCTAGTGTAGCGGTGA  
AATGCGTAGATATTAGGAGGAACACCACTGGCGAAGGCGGCTGCTGGGCTTTACTGACGCTGAGGCTCGAAAGCGTGG  
GGAGC  
>ASV:6050:Genus:Barnesiella  
TACGTAGGATCCGAGCGTTATCCGGATTTATTGGGTTAAAGGGTGCCTAGGCGGCACGCCAAGTCAAGCGGTGAAATTC  
CGGGCTCAACCCGACTGTGCCGTTGAAACTGGCGAGCTAGAGTGCACAAGAGGCAGGCGGAATGCGTGGTGTAGCGGTG  
AAATGCATAGATATCACGCAGAACCCGATTGCGAAGGCAGCCTGCTAGGGTGCACAGGCGCTGAGGCACGAAAGCGTGG  
GGTAT  
>ASV:6051:Family:Ruminococcaceae  
TACGTATGGTGAAGCGTTATCCGGATTTACTGGGTGTAAGGGTGCCTAGGTGCAAGGCAAGTCTGAAGTGAATCC  
GGGGCTCAACCCATAAACTGCTTTCAAACCTGTTTTCTTGAGTAGTGCAGAGGTAGCGGGAATCCCGGTGTAGCGGTG  
GAATGCGTAGATATCGGGAGGAACACCACTGGCGAAGGCGGATTGCTGGACGACAAGTACGCTGAGGCTCGAAAGCGTGG  
GGAG  
>ASV:6052:Genus:Anaerofilum  
TACGTATGGTGAAGCGTTATCCGGATTTACTGGGTGTAAGGGAGCGCAGGCGGAAAAATAAGTCTAATGTGAAAGCCC  
TCGGCTTAACCGAGGAACTGCATCGGAACTGTTTTCTTGAGTAGTGCAGAGGTAGCGGGAATCCCGGTGTAGCGGTG  
GAATGCGTAGATATCGGGAGGAACACCACTGGCGAAGGCGGCTACTGGGCACCAACTGACGCTGAGGCTCGAAAGCATG  
GGTAG  
>ASV:6053:Genus:Fusicatenibacter  
TACGTAGGGGGCAAGCGTTATCCGGATTTACTGGGTGTAAGGGAGCGTAGACGGCAAGGCAAGTCTGATGTGAAAACCC  
AGGGCTTAACCTGGGACTGCATTGAAACTGTCTGGCTCGAGTGCAGGAGGTAAGCGGAATCCTAGTGTAGCGGTG  
AAATGCTTAGATATCACGAAGAACTCCGATTACGAAGGCAGCCTGCTAAGCTGCAACTGACATTGAGGCTCGAAAGTGTG  
GGTAT  
>ASV:6054:Family:Ruminococcaceae  
TACGGAGGGTGAAGCGTTATCCGGATTTACTGGGTGTAAGGGCGTGTAGGCGGGATTGCAAGTCAAGTGTGAAAACCTG  
GGGGCTCAACCTCCAGCTGATTTGAAACTGTAGTTCTTGAGTGCAGGAGGTAAGCGGGAATCCTAGTGTAGCGGTG  
AAATGCGTAGATATTAGGAGGAACACCACTGGCGAAGGCGGCTACTGGACGGTACTGACGTTGAGGCTCGAAAGTGTG  
GGTAT  
>ASV:6055:Phylum:Firmicutes  
TACGTAGGGGGCAAGCGTTATCCGGATTTACTGGGTGTAAGGGAGCGTAGACGGCGCAGCAAGTCTGATGTGAAAGGCA  
GGGGCTTAACCCCTGACTGCATTGAAACTGTTGAGCTTGAGTGCAGGAGAGGAAAGGGGAATCCAGTGTAGCGGTG  
AAATGCGTAGATATTGGGAGGAACACCACTGGCGAAGGCGGCTTTCTGGACTGTGTCTGACGCTGAGATGCGAAAGCCAG  
GGTAG  
>ASV:6056:Family:Veillonellaceae  
TACGTAGGTGGCAAGCGTTGTCCGGAAATTATCGGGCTAAAGGGCGCGCAGGCGCATCGCAAGTGGTCTTAAAGTGC

GGGGCTTAACCCCGTAGGGGACCGAAACTGTATGACTAGAGTGCAGGAGAGGTAAGCGGAATTCCTAGCGTAGCGGTGA  
AATGCGTAGATATTAGGAAGAACACCGGTGGCGAAGGCGGCTTACTGGACTGTTACTGACGCTGAGTCACGAAAGCGTGG  
GGAGC

>ASV:6057:Family:Lachnospiraceae

TACGTAGGGGGCAAGCGTTATCCGGATTTACTGGGTGTAAGGGGAGCGTAGACGGTAAAGCAAGTCTGAAGTGAAGGCC  
GCGGCTCAACCTGCGGACTGCTTTGAAACTGTTAACTGGAGTGTGCAGAGGTAGGTGGAATTCCTAGGTGAGCGGTG  
GAATGCGTAGATATCGGAGGAACACCAGTGGCGAAGGCGACCTACTGGCACCACCTGACGCTGAGGCTCGAAAGCATG  
GGCAG

>ASV:6058:Genus:UC5-1-2E3

TACGGAGGATCCGAGCGTTATCCGGATTTATTGGGTTAAAGGGGAGCGTAGATGGATGTTAAAGTCAGTTGTGAAAGTTT  
GCGGCTCAACCCCGGACTGCTTTGAAACTGTTCTGCTAGAGTGTGGAGAGGCAAGCGGAATTCCTAGGTGAGCGGTG  
AAATGCGTAGATATTAGGAGGAACACCAGTGGCGAAGGCGGCTTGTGGACAGTAACGACGTTGAGGCTCGAAAGCGTG  
GGGAG

>ASV:6059:Family:Enterobacteriaceae

TACGGAGGGTGCAGCGTTAATCGGAATTACTGGGCGTAAAGCGCACGAGGCGGTTTGTAAAGTCGGATGTGAAATCCC  
CGGGCTCAACCTGGGAACTGCATCTGATACTGGCAAGCTTGTAGTCTCGTAGAGGGGGGTAGAATTCAGGTGTAGCGGTG  
AAATGCGTAGAGATCTGGAGGAATACCGGTGGCGAAGGCGAGCTACTAGACTGTTACTGACACTGATGCTCGAAAGTGTG  
GGTAT

>ASV:6060:Family:Muribaculaceae

TACGGAGGATCCGAGCGTTATCCGGATTTATTGGGTTAAAGGGTGCAGGCGGAATGTCAAGTCAGCGGTAAATTTT  
GGGGCTCAACCCCGTGTGCGGTTGAAACTGGCGTCTTGTAGTGAGCGAGAAGTATGCGGAATGCGTGGTGTAGCGGTGA  
AATGCATAGATATCACGGAAGAACTCCGATTGCGAAGGCGAGCATAACCGGCGCTCAACTGACGCTCATGCACGAAAGCGTGG  
GTATC

>ASV:6061:Order:Bacteroidales

TACGTAGGGAGCAAGCGTTATCCGGATTTATTGGGTGTAAGGGTGCCTAGACGGGAAGGTAAGTTAGTTGTGAAATCCC  
TCGGCTCAACTGAGGAACTGCGACTAAAACGTTTTTCTTGTAGTACAGTAGAGGTGGGCGGAATTCGTGGTGTAGCGGTG  
AAATGCTTAGATATCACGAAGAACTCCGATTGCGAAGGCGAGCTACTAGACTGTTACTGACACTGATGCTCGAAAGTGTG  
GGTAT

>ASV:6062:Family:Erysipelotrichaceae

TACGTAGGTGGCGAGCGTTATCCGGAATCATTGGGCGTAAAGGAGGAGCAGGCGGAGTGCAGGCTGCGGTGAAAGACC  
GGAGCTAAACTTCGGTAAGCCGTGGAACCGCACAGCTAGAGAGCATCAGAGGATCGCGGAATTCATGTGTAGCGGTGA  
AATGCTTAGATATCACGAAGAACTCCGATTGCGAAGGCGAGCTGCTAAGCTGCAACTGACATTGAGGCTCGAAAGTGTGG  
GTATC

>ASV:6063:Family:Lachnospiraceae

TACGGAGGATCCGAGCGTTATCCGGATTTATTGGGTTAAAGGGGAGCGTAGACGGCTGTGCAAGTCTGGAGTGAAGGCC  
GGGGCTCAACCCCGGACTGCTTTGAAACTGTTTGTCTAGAGTGTGCGGAGAGGTAAGTGAATTCCTAGGTGAGCGGTG  
AAATGCGTAGATATTAGGAGGAACACCAGTGGCGAAGGCGGCTTACTGGACGATAACAACTTGAAGGCTCGAAAGTGTG  
GGTAT

>ASV:6064:Family:Lachnospiraceae

TACGGAGGATCCGAGCGTTATCCGGAATTTATTGGGCGTAAAGCGCGCAGGCGGAAGGCTAAGTCTGATGTGAAAGCCC  
GGGGCTCAACCCCGTACTGCATTGGAACCTGGTCACTAGAGTGTGCGGAGGGGTAAGTGAATTCCTAGGTGAGCGGTG  
AAATGCGTAGATATTAGGAGGAACACCAGTGGCGAAGGCGGCTGCGCTGGTCTGTAACGACACTGATGCACGAAAGTGTG  
GGTAG

>ASV:6065:Genus:Solobacterium

TACGTAGGGGGCGAGCGTTATCCGGAATTTATTGGGCGTAAAGGGTGCCTAGGCGGCCTGTTAAGTAAGTGGTTAAATTTG  
TGGGCTCAACCCAATCCAGCCACTTAACTGGCAGGCTAGAGTATTGGAGAGGCAAGTGAATTCATGTGTAGCGGTAA  
AATGCGTAGATATTAGGAGGAACACCAGTGGTGAAGGCGGCTTGTGCTAGCCAAAGACTGACGCTCATGCACGAAAGCGTGG  
GGAGC

>ASV:6066:Kingdom:Bacteria

TACGTAGGTGGCAAGCGTTGTCCGGATTTACTGGGTGTAAGGGGCGTGCAGCCGGTCTGCAAGTCAGATGTGAAATCCA  
TGGGCTCAACCCATAGCCTGCATTTGAAACTGCAGAGCTTGTAGTGAAGTAGAGGCAGGCGGAATTCGTGGTGTAGCGGTG  
AAATGCTTAGATATCACGAAGAACTCCGATGCGAAGGCATTGTGCCGGGCATAACTGACGCTGAGGCTCGAAAGTGTGG  
GGTAT

>ASV:6067:Kingdom:Bacteria

TACGTAGGGAGCAAGCGTTGTCCGGATTTACTGGGTGTAAGGGTGCCTAGGCGGCCCGGAGGCGGGGGTGAAGCGG  
GGGGCTCAACCCCGAAGCCCGGAACCTCCGCGCTTGGTCCGGTAGGGGAGGTTGGAACACCCGGTGTAGCGGTG  
AAATGCGTAGATATTAGGAGGAACACCAGTGGCGAAGGCGGCTTGTGGGCTCTAAGTACGCTGAGGCTCGAAAGTGTG  
GGGAG

>ASV:6068:Genus:Christensenellaceae\_R-7\_group

TACGTAGGGGGCAAGCGTTGTCCGGATTTACTGGGCGTAAAGGGGCGTGTAGGCGGCGATTTAAGTCTGGAGTGAAGTCC  
TGCTTTAAGGTGGGAATTGCTTTGGAATACTGGATGGCTAGAGTACAGGAGAGGAAAGCGGAATTCCTAGGTGAGCGGTG  
AAATGCGTAGATATTAGGAGGAACACCAGTGGCGAAGGCGGCTTACTGGGCACTAAGTACGCTGAGGCTCGAAAGTGTG  
GGTAG

>ASV:6069:Family:Lachnospiraceae

TACGTAGGGAGCAAGCGTTGTCCGGATTTACTGGGTGTAAGGGTGCCTAGGCGGCTTTGCAAGTCAGATGTGAAATCTA  
TGGGCTCAACCCATAGCCCGCATTTGAACTGCTGAGCTAGAGTGTGCGAGAGGCAAGTGAATTCCTAGGTGAGCGGTG  
AAATGCGTAGATATTAGGAGGAACACCAGTGGCGAAGGCGGCTTGTGGACGATGACTGACGTTGAGGCTCGAAAGCGTG  
GGGAG

>ASV:6070:Genus:Dialister  
TACGTAGGTGGCAAGCGTTGTCCGGAATTATTGGGCGTAAAGCGCGCAGGCGGTCACTTAAGTCCATCTTAGAAGTGC  
GGGGCTTAACCCCGTATGGGATGAAACTGGGAGACTGGAGTATCGGAGAGGAAAGTGAATTCCCTAGTGTAGCGGTGA  
AATGCGTAGATATTAGGAGGAACACCAGTGGCGAAGGCGGATTGCTGGACAGCAACTGACGGTGAGGCGGAAAGTGTGG  
GGAGC

>ASV:6071:Genus:Cuneatibacter  
TACGGAGGATCCGAGCGTTATCCGGATTTATTGGGTTTAAAGGGAGCGTAGGCGGGTTGTTAAGTCAGAAGTGAAAACCC  
AGGGCTTAACCTGCGGATTGCTTTTGGAACTGTCAGGCTCGATTGCCGGAGAGGTAAGTGAATTCCCTAGTGTAGCGGTG  
AAATGCGTAGATATTAGGAGGAACACCAGTGGCGAAGGCGGCTTACTGGACGGTAAATGACGCTGAGGCTCGAAGGTGTG  
GGTAT

>ASV:6072:Class:Bacteroidia  
TACGTAGGTGGCGAGCGTTGTCCGGAATGATTGGGCGTAAAGGGCGCGTAGGCGGCCTGGTAAGTCTGAAGTGAAAGTCC  
CGCTTTCAAGGTGGGAATTGCTTTGGATACTGCTGGGCTTGGTACAGTACAGTAGAGGTGGGCGGAATTCGTGGTGTAGCGGTG  
AAATGCTTAGATATCAGGAAGAACTCCGATTGCGAAGGCAGCTCACTGGACTGCAACTGACACTGATGCTCGAAAGTGTG  
GGTAT

>ASV:6073:Class:Bacteroidia  
TACGGAGGATCAAGCGTTATCCGGATTTATTGGGTTTAAAGGGTGCCTAGGCGGTTTGATAAGTTAGAGGTGAAAGCTC  
GATGCTCAACATCGAAATTGCCTCTGATACTGTCAGACTAGAGTGTAGAAGGGGAGAGTGAATTCCATGTGTAGCGGTG  
AAATGCGTAGATATAGGAGGAACACCAGTGGCGAAGGCGGCTCTCTGGTCTGTAAGTACGCTGAGGCTCGAAAGCGAG  
GGGAG

>ASV:6074:Genus:Hungatella  
CACGTAGGGGGCAAGCGTTATCCGGATTTACTGGGTGTAAGGGAGCGTAGACGGTTTAGCAAGTCTGAAGTGAAAGCCC  
GGGGCTCAACCCCGGTACTGCTTTGGAACTGTTAGACTTGGTGCAGGAGAGGTAAGTGAATTCCCTAGTGTAGCGGTG  
AAATGCGTAGATATTGGGAGGAACACCAATGGCGAAGGCGGCTCTCTGGCCGTTACTGACGCTGAGGAGCGAAAGCGTG  
GGGAG

>ASV:6075:Order:Clostridiales  
TACGGAGGATCCGAGCGTTATCCGGATTTATTGGGTTTAAAGGGAGCGTAGATGGATGTTAAGTCAGTTGTGAAAGTTT  
GTGGCTCAACCCGTTAAATGCACTTGGAACTGATTTTCTTGGTGTGCGGAGAGGTTGACGGAATTCCTAGTGTAGCGGTG  
AAGTGCCTAGATATTAGGAGGAACACCAGTGGCGAAGGCGGCTCACTGGACGATAACTGACGCTGAGGCGGAAAGCGTG  
GGGAG

>ASV:6076:Genus:Ruminococcaceae\_NK4A214\_group  
TACGTAGGTGGCGAGCGTTATCCGGATTTACTGGGTGTAAGGGAGCGTAGGCGGGAATGCAAGTCAGATGTGAAATCCA  
GGGGCTTAACCCCTGAACTGCATTTGAACTGATTTTCTTGGTGTGCGGAGAGGTTGACGGAATTCCTAGTGTAGCGGTG  
AAATGCGTAGATGTTAGGAGGAACACCAGTGGCGAAGGCGGTTGCTGGCTGTAAGTACGCTCATGCACGAAAGCGTG  
GGGAG

>ASV:6077:Family:Lachnospiraceae  
TACGTAGGGGGCAAGCGTTATCCGGATTTACTGGGTGTAAGGGAGCGTAGACGGCGTGGAAGTCTGATGTGAAAGGCA  
TGGGCTCAACCTGTGGACTGCATTTGAACTGTCATGCTTGGTGTGCGGAGGGGTAAGCGGAATTCCTAGTGTAGCGGTG  
AAATGCGTAGATATCAGCAGAACTCCGATTGCGAAGGCGGCTTACTAAACCATAACTGACACTGAAGCACGAAAGCGTG  
GGGAT

>ASV:6078:Family:Lachnospiraceae  
TACGTATGGTGCAGCGTTATCCGGATTTACTGGGTGTAAGGGTGCCTAGGCGGCTTTGCAAGTCAAGTGTGAAATCTA  
TGGGCTCAACCATAAACTGCATTTGAACTGTAGAGCTTGGTGTGCAACAGAGGTAGGCGGAATTCGTGGTGTAGCGGTG  
AAATGCTTAGATATCAGGAAGAACTCCGATGGCGAAGGCGGCTTACTGGACGATTACTGACGCTGAGGCTCGAAAGCGTG  
GGGAG

>ASV:6079:Genus:Sphingobacterium  
TACGGAGGATCCGAGCGTTATCCGGAATTATTGGGTTTAAAGGGTGCCTAGGCGGCCAGATAAGTCAAGGGTGAAAGTGC  
GCAGCTCAACTGTGCGAGTGCCTTTGATACTGTTGGCTTGAATTCGGTTGAAGATGGCGGAATGAGACAAGTACGGGTG  
AAATGCTAGATATGCTCAGAACCCGATTGCGAAGGCGGCTATCTAATCCGTTATTGACGCTGATGCACGAAAGCGTG  
GGGAG

>ASV:6080:Genus:Acinetobacter  
TACAGAGGGTGCAGCGTTAATCCGATTTACTGGGCGTAAAGGCGTGCCTAGGCGGCTTTTTAAGTCCGATGTGAAATCCC  
CGAGCTTAACCTGGGAATTGCATTCGATACTGGGAAGCTAGAGTATGGGAGAGGATGGTAGAATTCAGGTGTAGCGGTG  
AAATGAGTAGAGATCTGGAGGAATACCGATGGCGAAGGCGGCTTACTGGCCTAATACTGACGCTGAGGTACGAAAGCATG  
GGGAG

>ASV:6081:Genus:Anaerofustis  
TACGTAGGGGGCAAGCGTTGTCCGGATTTACTGGGCGTAAAGAGCACGTAGGTGGTTAATTAAGTCAAGTGTGAAAGTTT  
TCGGCTCAACCCGAAAGTGCATTTGAACTGGATAACTTGGTATCGGAGAGGTAAGCGGAATTCCTAGTGTAGCGGTG  
AAATGCGTAGAGATTAGGAAGAACACCAGTGGCGAAGGCGGCTTACTGGACGATAACTGACGCTGAGGTGCGAAAGCGTG  
GGGAG

>ASV:6082:Family:Lachnospiraceae  
TACGTAGGGGGCAAGTGTATCCGGATTTACTGGGTGTAAGGGAGCGTAGACGGCATAACAAGTCTGATGTGAGAGGCT  
GGGGCTTAACCCGGGACTGCATTTGAACTGTTAAGCTTGGTGTGCGGAGGGGTAAGCGGAATTCCTAGTGTAGCGGTG  
AAATGCGTAGATATTAGGAGGAACACCAGTGGCGAAGGCGGCTTACTGGGACCAACTGACGCTGAGGCTCGAAAGTGTG  
GGTAG

>ASV:6083:Order:Bacteroidales  
TACGGAGGATCCGAGCGTTATCCGGATTTATTGGGTTTAAAGGGTGCCTAGGCGGCTTTTTAAGTCAAGCGGTGAAAGTCT  
GTGGCTCAACCATAGAATTGCCGTTGAACTGGGAGGCTTGGTGTGTTGAGGCGAGGCGGAATTCAGGTGTAGGAGTG



AAATCCGTAGATATCTGGAGGAACATCAGTGGCGAAGGCGGCCACCTGGACCGGTATTGGCGCTGAGGAGCGAAAGCGTG  
GGGAG  
>ASV:6084:Genus:Erysipelotrichaceae\_UCG-003  
TACGTAGGGGCTAGCGTTATCCGGAATTATTGGGCGTAAAGAGGGAGCAGGCGGCACTAAGGGTCTGTGGTAAAAGATC  
GAAGCTTAACTTCGGTAAGCCATGAAACCGTAGAGCTAGAGTGTGTGAGAGGATCGTGAATTCCATGTGTAGCGGTGA  
AATGTGTAGATATCACGAAGAACTCCGATTGCGAAGGCAGCTGCTAAGCTGCAACTGACATTGAGGCTCGAAAGTGTGG  
GTATC  
>ASV:6085:Kingdom:Bacteria  
TACGGAGGATGCAAGCGTTATCCGGATTTACTGGGTGTAAGGGTGCCTAGGCGGGCTGTCAAGTCAGATGTGAAATACC  
GGGGCTTAACTCCGGGGCTGCATTTGAAACTGATGGTCTTGAGTGAAGTAGAGGCAGGCGGAATTCCTAGTGTAGCGGTG  
AAATGCGCAGATATTTGGAAGAACACCGATGGCGAAGGCAGCTCTCTGGGCCGTCACTGACGCTGAGGCGCGAAAGCCGG  
GGGAG  
>ASV:6086:Family:Lachnospiraceae  
TACGTAAAGGGGCGAGCGTTGTCCGGAATTATTGGGCGTAAAGAGTGCCTAGGCGGCAAATTAAGTCAGATGTGAAAAC  
AGGGCTCAACCCATAGACTGCATTTGAACTGCTGAGCTAGAGTGTGGAGAGGCAAGTGAATTCCTAGTGTAGCGGTG  
AAATGCGTAGATATTAGGAGGAACACCACTGGCGAAGGCAGCTCTCTGGACGATGACTGACGTTGAGGCTCGAAAGCGTG  
GGGAG  
>ASV:6087:Class:Bacteroidia  
TACGGAGGATCAAGCGTTATCCGGATTTATTGGGTGTAAGGGTGCCTAGGCGGATTGGCAAGTCAGTAGTAAAATCCA  
TGGGCTTAAACCCATGACGTGCTATTGAACTGTTGATCTTGAGTGAAGTAGAGGTAAGCGGAATTCCTAGTGTAGCGGTG  
AAATGCTTAGATATCACGAAGAACTCCGATTGCGAAGGCAGCTCACTGGAGTGAAGTACGCTGATGCTCGAAAGTGTG  
GGTAT  
>ASV:6088:Family:Streptococcaceae  
TACGTAGGTCCCAGCGTTGTCCGGATTTATTGGGCGTAAAGCGAGCGCAGGCGGTTTGATAAGTCTGAAGTTAAAGGCT  
GTGGCTCAACCATAGTTCGCTTTGAAACTGTCAAACCTTGAGTGCAGAAAGGGAGAGTGAATTCCTAGTGTAGCGGTGA  
AGTGCCTAGATATCACTTGAACCCCGATAGCGAAGGCAGCTTCCAGGCTCGTTCTGACGCTGATGCGCGAGAGCGTGG  
GTAGC  
>ASV:6089:Family:Ruminococcaceae  
TACGTAGGTGGCAAGCGTTATCCGGAATTATTGGGTGTAAGGGTGCCTAGGCGGGATGTAAGTCAGATGTGAAATGCC  
GCAGCTTAACTGCGGAGCTGCATTTGAAACTTACGTTCTTGAGTGAAGTAGAGGTAAGCGGAATTCCTAGTGTAGCGGTG  
AAATGCGTAGATATTAGGAGGAACACCGGTGGCGAAGGCAGCTTACTGGGCTTAAACTGACGCTGAGGCACGAAAGTGTG  
GGGAG  
>ASV:6090:Genus:Holdemanelia  
TACGGAGGATCCGAGCGTTATCCGGATCTATTGGGTTTAAAGGGAGCGTAGGCGGATTGTTAAGTCAGTTGTGAAAAGTTT  
GCGGCTCAACCCGACTGGCTCTGAAACTGATCAGCTAGAGAACAGAGAGACGGCGGAATTCCTAGTGTAGCGGTAA  
AATGCGTAGATATGGAAGAACACCGGTGGCGAAGGCAGCTCTGGTCTGGATTCTGACACTGAAGCACGAAAGCGCG  
GGGAG  
>ASV:6091:Genus:Fastidiosipila  
TACGTAGGTGGCGAGCGTTATCCGGATTTACTGGGCGTAAAGGGCGTGTAGGCGGCTAGATAAGTGTGATGTTTAAATCC  
AAGGCTTAACTTGGGGTTCATTACAACTGTTTACTGTTGAGTGTGCTGGAGAGGATAGTGAATTCCTAGTGTAGCGGTAA  
AATGCGTAGATATTAGGAGGAACACCGGTGGCGAAGGCAGCTTACTGGACAGTAACTGACGCTGAGGCGCGAAAGCGTGG  
GGAGC  
>ASV:6092:Genus:Parabacteroides  
TACGTAGGGAGCAAGCGTTATCCGGATTTATTGGGTTTAAAGGGTGCCTAGGTTGGTGATTTAAGTCAGCGGTGAAAAGTTT  
GTGGCTCAACCATAAAATTGCCGTTGAAACTGGGTTACTTGAGTGTGTTTGGAGTAGGCGGAATAAGTTAAGTAGCGGTG  
AAATGCATAGATATAACTTAGAACTCCGATAGCGAAGGCAGCTTACCAGACTGTAAGTACGCTGATGCACGAGAGCGTG  
GGTAG  
>ASV:6093:Genus:Christensenellaceae\_R-7\_group  
TACGTAGGGGCGGGCGTTGTCCGGAATGATTGGGCGTAAAGGGCGGCTAGGCGGCCTGCTAAGTCTGGAGTAAAAGTCC  
TGCTTTCAAGGTGGGAATTGCTTTGGATACTGGTGGGCTGGAGTGCAGGAGAGGAAAGCGGAATTCCTAGTGTAGCGGTG  
AAATGCTTAGAGATCATACAGAACACCGATTGCGAAGGCAGCTTACCAAATATATCTGACGTTGAGGCACGAAAGCGTG  
GGGAG  
>ASV:6094:Family:Clostridiaceae\_1  
TACGGAGGATCCGAGCGTTATCCGGATTTATTGGGTTTAAAGGGAGCGTAGGCGGACTTTTAAAGTGAAGTGTGAAATACC  
CGGGCTCAACTTGGGTGCTGCATTTCAAACCTGGAAGTCTAGAGTGCAGGAGAGGAGAATGGAATTCCTAGTGTAGCGGTG  
AAATGCGTAGAGATCATACAGAACACCGATTGCGAAGGCAGCTTACCAAATATATCTGACGTTGAGGCACGAAAGCGTG  
GGGAG  
>ASV:6095:Class:Bacteroidia  
TACGGAGGATCAAGCGTTATCCGGATTTATTGGGTTTAAAGGGTGCCTAGGTTGGTGATTTAAGTCAGCGGTGAAAAGTTT  
GTGGCTCAACCATAAAATTGCCGTTGAAACTGACAGCCTTGAGTATCGGAGAGGAAAGCGGAATTCCTAGTGTAGCGGTG  
AAATGCGTAGATATTAGGAGGAACACCACTGGCGAAGGCAGCTTACCAAATATATCTGACGTTGAGGCACGAAAGCGTG  
GGTAG  
>ASV:6096:Family:Lachnospiraceae  
TACGTATGGAGCAAGCGTTATCCGGATTTACTGGGTGTAAGGGAGCGTAGGCGGCTCTGCAAGTCTGATGTGAAAGCCC  
TCGGCTTAACTGAGGAACTGCAACTAAAACCTGGTTTTCTTGAGTGTGGAGAGGAAAGTGAATTCCTAGTGTAGCGGTG  
AAATGCGTAGATATTAGGAGGAACACCACTGGCGAAGGCAGCTTACTGGACTGCTACTGACACTGAGGCACGAAAGCGTG  
GGGAT  
>ASV:6097:Genus:Candidatus\_Soleaferrea

TACGTAGGTGGCAAGCGTTGTCCGGAATTACTGGGTGTAAGGGAGCGTAGGCGGTATTGCAAGTTGAATGTGAAATCTA  
TCGGCTCAACTGATAGGCTGCGTTCAAACCTGAGTACTTGAAGTAGAGGAGGCGGAATCCCGGTGTAGCGGTG  
GAATGCGTAGATATCGGGAGGAACACCAGTGGCGAAGGCGGCTGCTGGCTTTAACTGACGCTGAGGCTCGAAAGCATG  
GGGAG  
>ASV:6098:Kingdom:Bacteria  
TACGTAGGGAGCAAGCGTTGTCCGGATTTACTGGGTGTAAGGGTGCCTAGGCGGACGCTTAAAGTCAAGTGTGAAAGCCC  
GGGGCTCAACCCCGTACTGCATTTGAAACTGTCTAGCTAGAGTGCAGGAGAGGTAAGCGGAATGTATGGTGTAGCGGTG  
AAATGCTTAGAGATCATACAGAACACCAGTGGCGAAGGCGGCTTACCAAATATATCTGACGTTGAGGCACGAAAGCGTG  
GGGAG  
>ASV:6099:Class:Bacteroidia  
TACGGAGGATTCAAGCGTTATCCGGATTTATTGGGTTAAAGGGAGCGTAGATGGATGTTTAAAGTCAAGTGTGAAAGTTT  
GCGGCTCAACCGTAAATTTGCAAGTGTACTGGTGTCTTGAAGTACAGTAGAGGTAAGCGGAATTCCTAGTGTAGCGGTG  
AAATGCGTAGATATTAGGAAGAACCAGTGGCGAAGGCGATTTGCTGGACAGTAACGACGCTGATGCGCGAAAGTGTG  
GGGAG  
>ASV:6100:Family:Ruminococcaceae  
TACGTAGGGAGCAAGCGTTATCCGGATTTACTGGGTGTAAGGGGCGTAGGCGGGAGTCAAGTCAAGTGTGAAAACCTA  
TGGGCTCAACCCATAGCCTGCATTTGAAACTGTACTTCTTGAAGTACTGGGAGGCGAGGCGGAATTCGTGGTGTAGCGGTG  
AAATGCGTAGATATCACGCAGAACCAGTGGCGAAGGCGGCTGCTAGGTTGCGACAGACGCTGAGGCACGAAAGCGTG  
GGTAT  
>ASV:6101:Genus:Bacteroides  
TACGGAGGATCCGAGCGTTATCCGGATTTATTGGGTTAAAGGGAGCGTAGATGGATGTTTAAAGTCAAGTGTGAAAGTTT  
GCGGCTCAACCGTAAATTTGCAAGTGTACTGGTGTCTTGAAGTACAGTAGAGGTGGGCGGAATTCGTGGTGTAGCGGTG  
AAATGCTTAGATATCACTTGGAAACCCGATAGCGAAGGCGGCTTCCAGGCTCGATCTGACGCTGATGCGCGAGAGCGTG  
GGTAG  
>ASV:6102:Genus:Ruminococcaceae\_UCG-013  
TACGTAGGGAGCGAGCGTTGTCCGATTTACTGGGTGTAAGGGGCGTAGGCGGACTGTCAAGTCAAGTGTGAAATACC  
GGGGCTTAACCCCGGGCTGCGATTGAAACTGACAGCCTTGAAGTATCGGAGAGGAAAGCGGAATTCCTAGTGTAGCGGTG  
AAATGCTTAGATATCACGAAGAACCAGTGGCGAAGGCGGCTACCCGACTGCAACTGACACTGATGCTCGAAAGTGTG  
GGTAT  
>ASV:6103:Kingdom:Bacteria  
AACGTAGGTCACAAGCGTTGTCCGGAATTACTGGGTGTAAGGGAGCGTAGGCGGTCTGATAAGTTGGATGTGAAATACC  
CGGGCTTAACCTGGGGGTGCATCAATACTGTTGGACTAGAGTACAGGAGAGGAAAGCGGAATTCCTAGTGTAGCGGTG  
AAATGCGTAGATATCACGCAGAACCAGTGGCGAAGGCGGTTACTGAAACCATAACTGACACTGAAGCACGAAAGCGTG  
GGGAT  
>ASV:6104:Kingdom:Bacteria  
TACGGAGGATCCGAGCGTTATCCGGATTTATTGGGTTAAAGGGTGCCTAGGCGGTTTATAAGTTAGAGGTGAAATCCC  
GGGGCTTAACCTGGGGCTGCAATGAGAACTGTTAGGCTTGAAGTGCAGGAGAGGAAAGGGAAATCCAGTGTAGCGGTGA  
AATGCGTAGAGATTGGGAGGAACACCAGTGGCGAAGGCGGCTAACTGGACTGTAAGTACGCTGAGGCGCGAAAGTGTG  
GGAGC  
>ASV:6105:Family:Ruminococcaceae  
TACGTAGGGAGCGAGCGTTGTCCGGAATTACTGGGTGTAAGGGTGCCTAGGCGGTTATGCAAGTCAATGTGAAATACC  
GGGGCTCAACCTGGGGCTGCAATGAGAACTGTATATCTTGAAGTGCAGGAGAGGTAAGCGGAATTCCTAGTGTAGCGGTG  
AAATGCGTAGATATTAGGAGGAACACCAGTGGCGAAGGCGGCTTACTGGGCTGTAAGTACGCTGAGGCGCGAAAGTGTG  
GGGAG  
>ASV:6106:Order:Bacteroidales  
TACGGAGGATTCAAGCGTTATCCGGATTTATTGGGTTAAAGGGTGCCTAGGCGGTTTATAAGTTAGAGGTGAAAGTTT  
GGGGCTCAACCTGAACGTGCCTTAATACTGTTAGCTTGGGTGAAGTGAAGGTAGGCGGAATTCCTAGTGTAGCGGTG  
AAATGCGTAGAGATCGGGAGGAACACCAGTGGCGAAGGCGGCTTACTGGGCTTAACTGACGCTGAGGCGCGAAAGCATG  
GGTAG  
>ASV:6107:Family:Ruminococcaceae  
TACGGAGGATCCGAGCGTTATCCGGATTTATTGGGTTAAAGGGAGCGTAGACGGATGGACAAGTCTGATGTGAAAGGCT  
GGGGCTCAACCCCGGACTGCATTTGAAACTGTTTTCTTGAAGTGGTGGAGAGGCGAGGCGGAATTCCTAGTGTAGCGGTG  
AAATGCGTAGATATACGGAGGAACACCAGTGGCGAAGGCGGCTGCTGGACATTAAGTACGCTGAGGCGCGAAAGCGTG  
GGGAG  
>ASV:6108:Genus:Collinsella  
TACGTAGGGGGCAAGCGTTATCCGGAATTACTGGGTGTAAGGGTGCCTAGGCGGCCCGGCGAGCCGGGGTCAAGCGG  
GGGGCTCAACCCCGAAGCCCGGAACCTCCGCGCTTGGGTCCGGTAGGGGAGGTTGAAACACCAGGTTAGCGGTG  
GAATGCGCAGATATCGGGTGGAAACACCAGTGGCGAAGGCGGCTTCTGGACTGTGTCTGACGCTGAGATGCGAAAGCCAG  
GGTAG  
>ASV:6109:Order:Clostridiales  
TACGGAGGATCCGAGCGTTATCCGGATTTATTGGGTTAAAGGGTGCCTAGGCGGCTTTTAAAGTCAAGCGGTGAAAGTCT  
GTGGCTCAACCATAGAAATTGCGTTGAAACTGTCAAGTGCAGGAGAGGTAAGCGGAATTCCTAGTGTAGCGGTG  
AAATGCGTAGATATTAGGAGGAACATCAGTAGCGAAGGCGGCTCTCTGGACTGTAAGTACGCTGAGGCGCGAAAGCGTG  
GGGAG  
>ASV:6110:Family:Bifidobacteriaceae  
TACGTATGGTCAAGCGTTATCCGGATTTACTGGGTGTAAGGGAGCGAGGCGGTGCGGAAGTCTGATGTGAAAGTCC  
ATCGCTTAACCGTGGATCTGCGCGGGTACGGGCGGCTGGAGTGCAGGAGAGGTAAGCGGAATTCCTAGTGTAGCGGTG  
GAATGTGTAGATATCGGGTGGAAACACCAGTGGCGAAGGCGGCTTCTGGGCCGAGACGACGCTGAGGCGCGAAAGCGTG

GGGAG

>ASV:6111:Genus:Porphyromonas

TACGGAGGATACGAGCGTTATCCGGAATTATTGGGTTTAAAGGGTGCCTAGGTGGCTATTTAAGTCAGGGGTGAAAAGCA  
TGAGCTCAACTCACGTCTTGCCTTTGAAACTGGACAGCTAGAGAAAAGACGAGGTATGTGGAATGTGTGGTGTAGCGGTG  
AAATGCATAGATATCACACAGAACTCCGATTGCGCAGGCAGCGTACCAGACTTCTTCTGACACTGAAGCACGAAAGCGTG  
GGGAT

>ASV:6112:Family:Ruminococcaceae

TACGGAGGATCCAAGCGTTGTCCGGAATTACTGGGTGTAAGGGGCGCTAGGCGGACTGTCAAGTCAGTCGTGAAATACC  
GGGGCTTAACCCCGGGGCTGCGATTGAAACTGCAGGGCTAGAGTGCAGGAGGGGCAAGTGAATTCCTAGTGTAGCGGTG  
AAATGCGTAGATATTAGGAAGAACCAGTGGCGAAGGCGCTTACTGGACGGTAACGACGTTGAGGCTCGAAAGCGTG  
GGGAG

>ASV:6113:Family:Lachnospiraceae

TACGTAGGGTGCAGCGTTGTCCGGAATTACTGGGTGTAAGGGAGCGCAGGCGGTACGGCAAGTCTGATGTGAAAGCCC  
GGGGCTCAACCCGCGGATTGCTTTTGGAACTGTCATGCTAGAGTGCAGGAGGGGTGAGCGGAATTCCTAGTGTAGCGGTG  
AAATGCGTAGATATTAGGAGGAACACCGGAGGCGAAGGCAGCTTACTGGATTGTAACGACGCTGATGCTCGAAAGTGTG  
GGTAT

>ASV:6114:Genus:Stenotrophomonas

TACGAAGGGTGCAGCGTTACTCCGGAATTACTGGGCGTAAAGCGTGCCTAGGTGGTGTGTTAAGTCTGTTGTGAAAGCCC  
TGGGCTCAACCTGGGAATTGCAGTGGATACTGGGCGACTAGAGTGTGGTAGAGGGTAGTGAATTCCTAGTGTAGCGGTG  
AAATGCGTAGAGATCGGGGGAACATCCATGGCGAAGGCAGCTACTGGACCAACACGACACTGAGGCTCGAAAGTGTG  
GGTAT

>ASV:6115:Family:Peptococcaceae

TACGTAGGGGGCGAGCGTTGTCCGGAATCACTGGGCGTAAAGGGGCGCTAGGCGGTTTAAATTAGTCAGTGGTAAAAGTGC  
AGGGCTCAACCTCAGCCTGCCACTGATACTGTTAGACTTGAATGATGGAAGAGGAGAATGGAATTCCTAGTGTAGCGGTG  
AAATGCGTAGATATTAGGAGGAACACCGTGGCGAAGGCGATTCTCTGGGCCAAGACTGACGCTGAGGCGCGAAAGCGTG  
GGGAG

>ASV:6116:Species:anhuiense/faecium/kitahiroshimense

TACGGAGGATCCAAGCGTTATCCGGAATTTATTGGGTTTAAAGGGTGCCTAGGCGGCTATAAGTCAGTGGTAAAAGACG  
GCAGCTTAACTGTCGAGTGCCTTTGATACTGTAGGACTTGAATCTATTTGAAGTGGCGGAATAAGACAAGTAGCGGTG  
AAATGCATAGATATGCTTAGAACTCCGATTGCGAAGGCAGCTACTAAGTTAGTATTGACGCTGATGCACGAAAGCGTG  
GGGAT

>ASV:6117:Genus:Veillonella

TACGTAGGTGGCAAGCGTTGTCCGGAATTTATTGGGCGTAAAGCGCGCAGGCGGATTGGTCAAGTCTGTCTTAAAAGTTC  
GGGGCTTAACCCCGTATGGGATGAAACTGCCAATCTAGAGTATCGGAGAGGAAAGTGAATTCCTAGTGTAGCGGTGA  
AATGCGTAGATATCAGGAAGAACATCAGTGGCGAAGGCGACTTCTGACGAAAAGTACGCTGAGGCGCGAAAGCCAGG  
GGAGC

>ASV:6118:Order:Clostridiales

TACGGAGGATCCAAGCGTTATCCGGAATTTACTGGGTGTAAGGGAGCGTAGACGGATGGACAAGTCTGATGTGAAAGGCT  
ACGGCTCAACCGTAGTAAGCTCTTGAAGTGGAGACTTGAAGTGCAGGAGAGGAGAGTGAATTCCTAGTGTAGCGGTGA  
AATGCGTAGATATTAGGAGGAACACCGTGGCGAAGGCGGCTTACTGGACGATTACTGACGCTGAGGCTCGAAAGCGTGG  
GGAGC

>ASV:6119:Phylum:Firmicutes

TACGGAGGATCCGAGCGTTATCCGGAATTTATTGGGTTTAAAGGGTGCCTAGGTGGCAGTGCAGTGCAGATGTGAAAGGCC  
GGGGCTCAACCCCGAGCTGCATTTGAAACTGATTTCTTGAAGTGCAGGAGGTTGACGGAATTCCTAGTGTAGCGGTG  
AAATGCGTAGATATTAGGAAGAACCAGTGGCGAAGGCGACTTCTGGACGAAAAGTACGCTGAGGCGCGAAAGCCAG  
GGGAG

>ASV:6120:Order:Clostridiales

TACGTAGGGGGCTAGCGTTATCCGGAATTTACTGGGCGTAAAGGGTGCCTAGGTGGTTCCTAAGTCAGAGGTGAAAGGCA  
GTGGCTTAACTATTGAAGCTTGGCAACTGACGGACTTGAAGTGCAGGAGAGGAAAGCGGAATTCCTAGTGTAGCGGTGA  
AATGCGTAGATATTAGGAAGAACCAGTGGCGAAGGCGGCTTACTGGACGTTAACTGACGTTGAGGCTCGAAAGTGTGG  
GGAGC

>ASV:6121:Family:Ruminococcaceae

TACGTAGGGAGCGAGCGTTGTCCGGAATTTACTGGGTGTAAGGGTGCCTAGGCGGGATGGCAAGTCAAGTGTGAAATGCC  
GGGGCGCAACTCCGGAGCTGCATTTGAAACTGTCTTCTTGAAGTGAAGTAGAGGCAGGCGGAATTCCTAGTGTAGCGGTG  
AAATGCGTAGATATTAGGAGGAACCAGTGGCGAAGGCGGCTTACTGGACGATAACTGACGCTGAGGCTCGAAAGCGTG  
GGGAG

>ASV:6122:Family:Lachnospiraceae

TACGTAGGGGGCAAGCGTTATCCGGAATTTACTGGGTGTAAGGGAGCGTAGACGGCAAGGCAAGTCTGGAGTAAAAGCCC  
GGTGTCTAACCCCGGACTGCTTTGAAACTGTTTGGCTGGAGTGCAGGAGGTAAGCGGAATTCCTAGTGTAGCGGTG  
AAATGCTTAGAGATATACAGAACCAGTGGCGAAGGCGGCTTACCAACTATATCTGACGTTGAGGCGCAAAAGAGTG  
GGGAG

>ASV:6123:Order:Clostridiales

TACGTAGGTGGCAAGCGCTGTCCGGAATTTACTGGGTGTAAGGGAGCGCAGGCGGCTTCCCAAGTCCCCCTAAAAGTGC  
GGGGCTTAACCCCGTATGGGAAGGAAACTGTGCAGCTAGAGTGTGCGAGAGGTAAGCGGAATTCCTAGTGTAGCGGTGA  
AATGCGTAGATATTGGAGGAACCAGTGGCGAAGGCGGCTTGTGGGCTCTAACTGACGCTGAGGCTCGAAAGTGTGG  
GGAGC

>ASV:6124:Family:Lachnospiraceae

TACGTATGGAGCAAGCGTTATCCGGAATTTACGGGTGTAAGGGAGCGTAGGCGGTATGGCAAGTCTGATGTGAAAGGCA

GGGGCTCAACCCCTGGACTGCATTGAAACTGCCAGTCTTGTAGTGCAGGAGAGGTTAGTGGAATCCAGTGTAGCGGTG  
AAATGCGTAGAGATTGGGAGGAACACCAGTGGCGAAGGCGACTAACTGGACTGTAACGACGCTGAGGCGCAAAGTGTG  
GGGAG  
>ASV:6125:Phylum:Firmicutes  
TACGTAGGTCCCGAGCGTTGTCCGGATCTATTGGGCGTAAAGCGAGCGCAGGCGGTTTGATAAGTCTGAAGTTAAAGGCT  
GTGGCTCAACCATAGTTCGCTTTGAAACTGTCAAACCTTGTAGTGCAGAAAGGGAAAGTGAATTCCTAGTGTAGCGGTGA  
AATGCGTAGAGATTAGGAAGAACACCGGTGGCGAAGGCGACTTTCTGGACGAAAACCTGACGCTGAGGCGCAAAGCGTGG  
GGAG  
>ASV:6126:Kingdom:Bacteria  
TACTTCTTTCTCTCTTTTTCCGGAATTACTGGGCGTAAAGGGTGCCTAGGCGGCCTGGTAAGTCAGATGTGAAATACC  
CGTGCTCAACATGGGGGGTGCATCTGATACTGTTAGCCTTGTAGTGCAGGAGAGGAAAGCGGAATTCCTAGTGTAGCGGTG  
AAATGCGTAGATATCACGAAGAACCAGTGGCGAAGGCGACTACTGGACTGCAACTGACACTGATGCTCGAAAGTGTG  
GGTAT  
>ASV:6127:Genus:Desulfovibrio  
TACGTAGGTGGCAAGCGTTGTCCGGATTTACTGGGCGTAAAGCGCACGTAGGCTGTAGTGTAAAGTCAGGGGTGAAATCCC  
ACGGCTCAACCGTGGAACTGCCTTTGATACTGCACAACCTGAATCCGGGAGAGGGTGGCGGAATTCCTAGTGTAGGAGTG  
AAATCCGTAGATATCTGGAGGAACACCAGTGGCGAAGGCGGATTGCTGGACGACAACGACGCTGAGGCGCAAAGCGTG  
GGGAG  
>ASV:6128:Family:Ruminococcaceae  
TACGTAGGTGGCAAGCGTTGTCCGGAATTACTGGGTGTAAGGGAGCGTAGGCGGGGTGCCAAGTTGAATGTGAAATCGG  
CCGGCTTAACCTGGTCCGCTGCGTTCAAACCTGGCGCTCTTGTAGTGGAGCAGAGGCAAGGCGGAATTCCTAGTGTAGCGGTGA  
AATGCGTAGATATTAGGAGGAACACCAGTGGCGAAGGCGGCTGCTGGGCTTTAACTGACGCTGAGGCTCGAAAGCGTGG  
GTAGC  
>ASV:6129:Family:Ruminococcaceae  
TACGTAGGTGGCAAGCGTTGTCCGGAATTACTGGGTGTAAGGGTGCCTAGGCGGGATGGCAAGTCAGATGTGAAATACC  
GGGGCTTAACCCGGGGCTGCATTTGAAACTGTCTGTTCTTGTAGTGTGGAGAGGAAAGTGAATTCCTAGTGTAGCGGTG  
AAATGCGTAGATATTAGGAGGAACACCAGTGGCGAAGGCGACTTTCTGGACAATAACTGACGTTGAGGCACGAAAGTGTG  
GGGAG  
>ASV:6130:Order:Bacteroidales  
TACGGAGGATCCGAGCGTTATCCGGATTTATTGGGTTAAAGGGAGCGTAGGTTGGATTGTTAAGTCAGTTGTGAAAGTTT  
GCGGCTCAACCGTAAATTTGCAAGTGTAAACTGGCAGTCTTGTAGTACTGGAGAGGCAATCGGAATTCCTAGTGTAGCGGTG  
AAATGCGTAGATATCACGCAGAACCAGTGGCGAAGGCGACTGCTGGGATACAACGACGCTGAGGCACGAAAGCGTG  
GGTAT  
>ASV:6131:Genus:Ruminiclostridium\_6  
AACGTAGGTGGCAAGCGTTGTCCGGAATTACTGGGTGTAAGGGAGTGTAGGCGGGATCAAGTCAGAAGTGAATTA  
CGGGCTCAACTCGTAACCTGCTTTTGAACCTGACATTTCTTGTAGTGAAGTAGAGGCAAGGCGGAATTCCTAGTGTAGCGGTG  
AAATGCGTAGATATTAGGAGGAACACCAGTGGCGAAGGCGGCTACTGGGCACCAACTGACGCTGAGGCTCGAAAGTGTG  
GGTAG  
>ASV:6132:Genus:Parasutterella  
TACGTAGGGGGCAAGCGTTATCCGGATTTACTGGGTGTAAGGGAGCGTAGACGGTTTTGCAAGTCTGAAGTGAAGGCC  
GGGGCTTAACCCGGGAATGGCATATGTGGCTGCTCGACTAGAGTGTGTGAGAGGGAGGTGGAATTCACGCTGTAGCAGTG  
AAATGCGTAGATATTGGAAGAACCAGTGGCGAAGGCGACTCTCTGGGACATAACTGACGCTCAGGCACGAAAGCGTG  
GGGAG  
>ASV:6133:Family:Lachnospiraceae  
TACGTAGGTGGCGAGCGTTGTCCGGAATTACTGGGTGTAAGGGCGCGTAGACGGGTAGATAAGTTAGATGTGAAATACC  
GGGGCTCAACCCGGGACTGCATTTGAAACTGTCCGACTAGAGTGCAGGAGAGGTAAGTGAATTCCTAGTGTAGCGGTG  
AAATGCGTAGATATTAGGAGGAACACCAGTGGCGAAGGCGACTTTCTGGACAATAACTGACGTTGAGGCACGAAAGTGTG  
GGGAG  
>ASV:6134:Class:Clostridia  
TACGTAGGTGGCGAGCGTTGTCCGGAATTACTGGGCGTAAAGGGCGCGTAGGCGGATCGTTAAGTTGGACGTGAAATACC  
CCGGCTCAACTGGGGGGCGAGCTTCAAACCTGGCGGACTAGAGTGCAGGAGAGGAAAGTAGAATTCCTAGTGTAGCGGTG  
AAATGCGTAGATATTGGGAGGAATACCAGTGGCGAAGGCGGCTTTCTGGACTGTAACGACGCTGAGGCGCAAAGCTGG  
GGGAG  
>ASV:6135:Order:Coriobacteriales  
TACGTAGGGAGCGAGCGTTGTCCGGAATTACTGGGTGTAAGGGAGCGTAGGCGGGCTTTTAAGTCAGCGGTCAAATGTG  
GTGGCTCAACCTTAAGTCGGTTCTGAACTGGCAGGCTCGAGTGCAGTGTAGAGGAAGGTGGAATTCCTAGTGTAGCGGTG  
AATGCGCAGATATTGGGAAGAACCAGTGGCGAAGGCGACTTTCTGGCCGCACTGACGCTGAGGCGCAAAGCGTGG  
GGAGC  
>ASV:6136:Kingdom:Bacteria  
TACGTATGGTGAAGCGTTATCCGGATTTACTGGGTGTAAGGGAGCGCAGGCGGTACGGCAAGTCTGATGTGAAAGCCC  
GAGGCTTAACCTCGGTTCTGGTACTGGTACTGATAGAGTGTAGAGGAAAGTGAATTCCTAGTGTAGCGGTG  
AATGCGTAGATATTAGGAGGAACACCAGTGGCGAAGGCGGTTTCTGGGCCATTACTGACGTTGAGGCACGAAAGCGTGG  
GGAGC  
>ASV:6137:Family:Peptococcaceae  
TACGTAGGGGGCGAGCGTTGTCCGGAATCACTGGGCGTAAAGGGCGCGTAGGCGGTTAATAAGTCAGTGGTGAAGAACTG  
AGGGCTCAACCTCAGCCTGCCTACTGTTAGACTTTAGTATGGAAGAGGAGAATGGAATTCCTAGTGTAGCGGTG  
AAATGCGTAGATATTAGGAGGAACACCAGTGGCGAAGGCGATTCTCTGGCCAAAGTGTGACGCTGAGGCGCAAAGCGTG  
GGGAG

>ASV:6138:Kingdom:Bacteria  
TACGTAGGTGGCAAGCGTTATCCGGATTTACTGGGCGTAAAGGGTGCCTAGGCGGTCTTTAAGTCAGGAGTGAAAGGCT  
ACGGCTCAACCGTAGTAAGCTCTTAAACTGGAGGACTTGAGTGCAGTTGAGGCAGGCGGAATTCGTGGTGTAGCGGTGA  
AATGCTTAGATATCACGAAGAAGCTCCGATTGCGAAGGCAGCCTGCTAAGCTGCAACTGACATTGAGGCTCGAAAGTGTGG  
GTATC

>ASV:6139:Genus:Senegalimassilia  
TACGTATGGGGCGAGCGTTATCCGGATTCATTGGGCGTAAAGCGCGCGTAGGCGGAGCGCTAAGCGGGACCTCTAACCCG  
AGGGCTCAACCCCGGCGGCTCCCGAAGTGGCGCTCGAGTGCAGTTAGGGAGAGCGGAATTCGTGGTGTAGCGGTGA  
AATGCTTAGATATCACGAAGAAGCTCCGATTGCGAAGGCAGCCTGCTAAGCTGCAACTGACATTGAGGCTCGAAAGTGTGG  
GTATC

>ASV:6140:Species:gelidum/inhae/miyukkimchii  
TACGTATGTCGCCGAGCGTTATCCGGATTTACTGGGCGTAAAGCGAGCGGTTGATTAAGTCTGATGTGAAAGCCG  
GGGGCTCAACTCCGGAAAGGCATTGGAAACTGGTCAACTGAGTGCAGTAGAGGTAAGTGGAACTCCATGTGTAGCGGTG  
GAATGCGTAGATATATGGAAGAACCAGCGGCGAAGGCGGCTTACTGGACTGTAAGTACGCTTGGGCTCGAAAGTGTG  
GGTAG

>ASV:6141:Family:Clostridiaceae\_1  
TACGTAGGTGGCGAGCGTTGTCCGGATTTACTGGGCGTAAAGGGAGTGTAGGCGGACTTCTAAGTGAGATGTGAAATACC  
CGGGCTCAACCCCGGACTGCATTGAAACTGGAACTGCTGAGTGCAGGAGAGGAGAATGGAATTCCTAGTGTAGCGGTG  
AAATGCGTAGAGATTAGGAAGAACCAGTGGCGAAGGCGGCTTACTGGACGATAACTGACGCTGAGGCTCGAAAGCGTG  
GGGAG

>ASV:6142:Family:Ruminococcaceae  
TACGTAGGGGGCAAGCGTTATCCGGATTTACTGGGCGTAAAGGGTGCCTAGGTGGCAAGGCAAGTCAGATGTGAAAGCCG  
GGGGCTCAACCCCGGACTGCATTGAAACTGTTTTCTTGGAGTGCAGAGGTAGATGGAATTCCTGGTGTAGCGGTG  
GAATGCGTAGATATCGGGAGGAACACCAGTGGCGAAGGCGGCTTACTGGACGACAAGTACGCTGAGGCGGAAAGCGTG  
GGGAG

>ASV:6143:Family:Ruminococcaceae  
TACGTAGGGGGCAAGCGTTATCCGGATTTACTGGGCGTAAAGGGAGCGAGGCGGTGCGGCAAGTCAGATGTGAAAGCCG  
GGGGCTCAACCCCGGACTGCATTGAAACTGTTTTCTTGGAGTGCAGAGGCAATCGGAATTCCTGGTGTAGCGGTG  
GAATGCGTAGATATCGGGAGGAACACCAGTGGCGAAGGCGGCTTACTGGACGACAAGTACGCTGAGGCGGAAAGCGTG  
GGGAG

>ASV:6144:Family:Lachnospiraceae  
TACGGAGGATCCGAGCGTTATCCGGATTTACTGGGTTAAAGGGAGCGTAGGCGGACGCTTAAAGTCAGTTGTGAAAGTTT  
GCGGGCTCAACCCCGGACTGCATTGAAACTGTCGACTAGAGTGTGCGGAGGGTAAGCGGAATTCCTAGTGTAGCGGTG  
AAATGCGTAGATATTAGGAGGAACACCAGTGGCGAAGGCGGCTTACTGGGCACCAACTGACGCTGAGGCTCGAAAGTGTG  
GGTAG

>ASV:6145:Genus:Asaccharospora  
TACGGAGGATTCAAGCGTTATCCGGATTTACTGGGTTAAAGGGTGCCTAGGCGGTCTTTAAGTCAGGAGTGAAAGGCT  
ACGGCTCAACCGTAGTAAGCTCTTAAACTGGAGGACTTGAGTGCAGGAGGAGAGTGGAATTCCTAGTGTAGCGGTGA  
AATGCTTAGAGATCACAAGAACCAGTGGCGAAGGCAGCTTACCAAACTATATCTGACGTTGAGGCACGAAAGCGTGG  
GGAG

>ASV:6146:Order:Clostridiales  
TACGTAGGGGGCAAGCGTTATCCGGATTTACTGGGTTAAAGGGAGCGTAGACGGTATGGCAAGTCTGATGTGAAAGGCT  
ACGGCTCAACCGTAGTAAGCTTTGAAACTGGGAACTTGGTGCAGGAGAGGAGAGTGGAATTCCTAGTGTAGCGGTGA  
AATGCGTAGATATCGGGAGGAACACCAGTGGCGAAGGCGACCTACTGGGCACCAACTGACGCTGAGGCTCGAAAGTGTGG  
GTAGC

>ASV:6147:Family:Lachnospiraceae  
TACGTAGGGGGCAAGCGTTATCCGGATTTACTGGGTTAAAGGGTGCCTAGGTGGCAAGGCAAGTCAGATGTGAAAGGCA  
GGGGCTTAACCCCTGGACTGCATTGAAACTGCTGTGCTTGGAGTGCAGGAGGGTAAGCGGAATTCCTAGTGTAGCGGTG  
AAATGCGTAGATATTAGGAGGAACACCAGTGGCGAAGGCAGCTCACTAGACTGTCACGACTGATGCTCGAAAGTGTG  
GGTAT

>ASV:6148:Family:Lachnospiraceae  
AACGTATGGAGCAAGCGTTATCCGGATTTACTGGGTTAAAGGGAGTGTAGGTGGCATCACAAAGTCAGAAGTAAAGCCG  
GGGGCTCAACCCATGAAGTCTTTGAAACTGTTTTCTTGGAGTGCAGAGGTAGGCGGAATTCCTAGTGTAGCGGTG  
AAATGCGTAGATATTAGGAGGAACATCAGTGGCGAAGGCGGCTTACTGGGCTTAAAGTACGCTGAGGCTCGAGAGCGTG  
GGGAG

>ASV:6149:Genus:Butyricoccus  
AACGTAGGGAGCAAGCGTTATCCGGATTTACTGGGTTAAAGGGCGCGCAGGCGGGCGGCAAGTTGGAAGTAAATCTA  
TGGGCTTAACCCATAAACTGCTTTGAAACTGCTGGTCTTGGAGTGCAGAGGCAGGCGGAATTCCTGGTGTAGCGGTG  
AAATGCTTAGATATCACGAAGAAGCTCCGATTGCGAAGGCAGCCTGCTAAGCTGCAACTGACATTGAGGCTCGAAAGTGTG  
GGTAT

>ASV:6150:Family:Lachnospiraceae  
TACGTAGGGGGCAAGCGTTATCCGGATTTACTGGGTTAAAGGGAGCGTAGACGGCATGGCAAGCCAGATGTGAAAGCCG  
GGGGCTCAACCCCGGACTGCTTTGAAACTGTCAAGCTAGAGTGCAGTTGAGGCAGGCGGAATTCCTGTGTAGCGGTG  
AAATGCGTAGATATTAGGAGGAACACCAGTGGCGAAGGCGGCTTACTGGACATTAAGTACGCTGAGGCGGAAAGCGTG  
GGGAG

>ASV:6151:Phylum:Firmicutes  
TACGTAGGTCCCGAGCGTTGTCCGGATTTACTGGGCGTAAAGCGAGCGCAGGCGGTTTGATAAGTCTGAAGTTAAAGGCT  
GTGGCTCAACCGTAGTAAGCTTTGAAACTGGGAACTTGGTGCAGGAGAGGAGAGTGGAATTCCTAGTGTAGCGGTGA

AATGCGTAGAGATTAGGAAGAACACCAGTGGCGAAGGCGGCTTACTGGACGATGACTGACGTTGAGGCTCGAAAGCGTGG  
GGAGC  
>ASV:6152:Family:Ruminococcaceae  
TACGTAGGGAGCAAGCGTTGTCCGGATTTACTGGGTGTAAGGGTGCCTAGGCGGCTTTGCAAGTCAGATGTGAAATCTA  
TGGGCTTAACCCATAAACTGCTTTTGAACGTCTTCTTGGAGTATCGGAGAGGCAGGCGGAATTCCTAGTGTAGCGGTG  
AAATGCGTAGAGATTAGGAAGAACACCAGTGGCGAAGGCGACTTTCTGGACGAAAACGACGCTGAGGCGCGAAAGCGTG  
GGGG  
>ASV:6153:Family:Bifidobacteriaceae  
TACGTAGGGGGCAAGCGTTATCCGGATTTACTGGGTGTAAGGGAGCGTAGACGGTTAAGCGAGTCAGAAGTAAAAGGCT  
GGGGCTCAACCCGGGACTGCTTTTGAACGTTTAACTAGAGTGCAGAGGTAGTGGAATTCCTGGTGTAAACGGTG  
GAATGTGTAGATATCGGGAAGAACACCAATGGCGAAGGCGAGTCTCTGGGCCGTTACTGACGCTGAGGAGCGAAAGCGTG  
GGAG  
>ASV:6154:Genus:Pseudoflavonifractor  
TACGGAGGATCCGAGCGTTATCCGGATTTATTGGGTTAAAGGGTGCCTAGGTGGAATTTAAGTCAGCGGTGAAAGGCT  
GGGGCTCAACCCGGGACTGCTTTTGAACGTCAAACCTAGAGTACAGGAGAGGAAAGCGGAATTCCTGTGTAGCGGTG  
AAATGCGTAGATATACGGAGGAACACCAGTGGCGAAGGCGGATTGCTGGACAGTAACGACGCTGAGGCGCGAAAGCGTG  
GGAG  
>ASV:6155:Order:Clostridiales  
TACGGAAGTCCGGCGTTATCCGGATTTATTGGGTTAAAGGGAGCGTAGGTGATCACAAAGTCAGAAGTAAAAGCC  
GGGGCTCAACCCGGGACTGCTTTTGAACGTTCCTTGGAGTATCGGAGAGGCAGGCGGAATTCCTAGTGTAGCGGTG  
AAATGCGTAGATATTAGGAGGAACACCAGTGGCGAAGGCGGCTGCTGGACGACAACGACGCTGAGGCGCGAAAGCGTG  
GGAG  
>ASV:6156:Order:Clostridiales  
TACGTAGGGGGCGAGCGTTGTCCGGAATTACTGGGCGTAAAGGGCGCGCAGGCGGCCGATCAAGTTAGATGTGAAATACC  
CGGGCTTAACCTGGGAACTGCATTTAAACTGTTGGCTAGGAGTGCAGGAGAGGGAAGCGGAATTCCTAGTGTAGCGGT  
GAAATGCGTAGAGATTAGGAAGAACACCAGTGGCGAAGGCGACTTTCTGGACGAAAACGACGCTGAGGCGCTAAAGCGT  
GGGA  
>ASV:6157:Genus:Christensenellaceae\_R-7\_group  
TACGGAGGATCCGAGCGTTATCCGGATTTATTGGGTTAAAGGGAGCGTAGGCGGCTTTTTAAGTCTGGAGTAAAAGTCC  
TGCTTTCAAGGTGGGAATTGCTTTGGAGACTGGAGAGCTTGGAGTGCAGGAGAGGTAAGTGAATCCCAAGTGTAGCGGTG  
AAATGCGTAGAGATTGGGAGGAACACCAGTGGCGAAGGCGACTTACTGGGCCGTAACGACGCTGAGGCGCGAAAGCGTG  
GGAG  
>ASV:6158:Family:Ruminococcaceae  
TACGTAGGGGGCTAGCGTTATCCGGATTTACTGGGCGTAAAGGGCGCGTAGGCGGCTTTTTAAGTCAGGAGTAAAAGGCT  
ACGGCTCAACCGTAGTAAGCTTTGAAACTGTAGTCTTGGAGTGCAGGAGAGCAATCGGAATTCCTGGTGTAGCGGTGA  
AATGCGTAGATATACGGAGGAACACCAGTGGCGAAGGCGGATTGCTGGACGATAACTGACGCTGAGGCGCGAAAGCGTG  
GGAGC  
>ASV:6159:Genus:Dielma  
TACGTAGGTGGCAAGCGTTATCCGGAATTATTGGGCGTAAAGGGTGCCTAGGCGGCGAGATAAGTCTGAGGTAAAAGCCC  
GTGGCTCAACCCAGGTAAGCCTTTGAAACTGTCTGGCTGGAGTGCAGGAGAGGACAATGGAATTCATGTGTAGCGGTGA  
AATGCGTAGATATACGAAGAACTCCGATTGCGAAGGCGACTCACTAGACTGTTACTGACACTGATGCTCGAAAGTGTGG  
GTAGC  
>ASV:6160:Genus:Ruminococcaceae\_UCG-010  
TACGTAGGTGGCGAGCGTTGTCCGGATTTACTGGGTGTAAGGGCGGTAGGCGGGACTGTAAGTCAGATGTGAAATGCG  
GAGGCTTAACCTCCGAGCTGCATTTGAAACTGCAATTCCTGGAGTGTGGAGAGGTAAGCGGAATTCCTGGTGTAGCGGTGA  
AAATGCGTAGATATCGGAGGAACACCAGTGGCGAAGGCGGCTTACTGGACATTAACGACGCTGAGGCGCGAAAGTGTG  
GGAG  
>ASV:6161:Family:Clostridiales\_vadinBB60\_group  
TACGTAGGTGGCAAGCGTTATCCGGAATGACTGGGCGTAAAGGGTGCCTAGGTGTTTGGCAAGTTGGCGGCGTAATTC  
GGGGCTCAACTCTGGGCTACCGCCAAAACCTGCTGGACTCGAGTGCAGGAGGGGTAAGTGAATTCCTAGTGTAGCGGTG  
GAATGCGTAGATATTAGGAAGAACATCGTGGCGAAGGCGACTTACTGGACTGTAACGACACTGAGGCACGAAAGCGTG  
GGAG  
>ASV:6162:Family:Ruminococcaceae  
TACGTAGGGGGCGAGCGTTGTCCGGAATGACTGGGCGTAAAGGGCGGTAGGCGGCTTTTTAAGTCTGGAGTAAAAGCCC  
CTTTTTCAAGGAGGGGAGTGTCTTTGAAACTGTTCCCTTGGAGTATCGGAGAGGCAGGCGGAATTCCTAGTGTAGCGGTG  
AAATGCGTAGATATTAGGAGGAACACCAGTGGCGAAGGCGGCTGCTGGACGACAACGACGCTGAGGCGCGAAAGCGTG  
GGAG  
>ASV:6163:Kingdom:Bacteria  
TACGTAGGGGGCGAGCGTTGTCCGGAATGACTGGGCGTAAAGGGCGGTAGGCGGCTTTTTAAGTCTGGAGTAAAAGCCC  
CATTTTCAAGGTGGGACTGCTTTGGAGACTGGAGAGCTTGGAGTGCAGGAGGGAAGTGAATTCCTGGTGTAGCGGTG  
AAATGCTTAGATATACGAAGAACTCCGATTGCGAAGGCGACTTCTGGACTGTAACGACGCTGATGCTCGAAAGTGTG  
GGTAG  
>ASV:6164:Genus:Ruminococcaceae\_UCG-013  
TACGTAGGTGACAAGCGTTGTCCGGATTTACTGGGTGTAAGGGCGCGTAGGCGGACTGTCAAGTCAGTGTGAAATACC  
GGGGCTTAACCCGATGAGGGAAGGAACTGGGAAGTGGAGTATCGGAGAGGAAAGTGAATTCCTAGTGTAGCGGTGA  
AATGCGTAGAGATTAGGAAGAACACCAGTGGCGAAGGCGGCTCAACTGGACGATAACTGACGCTGAGGCGCGAAAGCGTG  
GGAGC  
>ASV:6165:Order:Clostridiales

TACGTAGGGAGCAAGCGTTGTCCGGAATTACTGGGCGTAAAGGGTGCCTAGGCGGGCGAGTGAGTCAGAAGTAAATATC  
GGGGCTTAACCCCGGGGCTGCGATTGAAACTGACAGCCTTAGTATCGGAGAGGAAAGCGGAATTCCTAGTGTAGCGGTG  
AAATGCGTAGATATCGGGAGGAACACCAGTGGCGAAGGCGGCTACTGGGCACCAACTGACGCTGAGGCTCGAAAGTGTG  
GGTAG  
>ASV:6166:Family:Ruminococcaceae  
TACGTAGGTGCGAGCGTTATCCGGAATTACTGGGTGTAAGGGAGCGTAGGCGGGGCGATAAGTCAGATGTAAATACC  
GGGGCTTAACCCCGGGGCTGCAATTTGAAACTATTGCTCTTAGTGTAGGTAGAGGCAAGCGGAATTCCTAGTGTAGCGGTG  
AAATGCGTAGATATTAGGAGGAACACCAGTGGCGAAGGCGGCTTGTGGGCTTTACTGACGCTGAGGCTCGAAAGCATG  
GGGAG  
>ASV:6167:Genus:Christensenellaceae\_R-7\_group  
TACGTAGGGGCGAGCGTTGTCCGGAATGACTGGGCGTAAAGGGCGTAGGCGGGCTTTTTAAGTCTGGGGTAAAGGCC  
CTTTTTCAAGGAGGGAGTGTCTTGGAGACTGGAGAGCTTAGTGTGCGAAGAGGTAAGTGAATTCACAGTGTAGCGGTG  
AAATGCGTAGAGATTGGGAGGAACACCAGTGGCGAAGGCGGCTTACTGGACGATAACTGACGCTGAGGCTCGAAAGCGTG  
GGGAG  
>ASV:6168:Order:Betaproteobacteriales  
TACGGAGGATCCGAGCGTTATCCGGATTTATTGGGTTTAAAGGGTGTGCAGGCGGCTGAGTAAGACAGATGTAAATCCC  
CGGGCTTAACCTGGGAACCGCATATGTGACTGCTTGGCTAGAGTGTGCTCAGAGGGAGGTGGAATTCACGCTGTAGCAGTG  
AAATGCGTAGATATGTGGAAGAACACCAGTGGCGAAGGCGGCTACTGGGCACCAACTGACGCTGAGGCTCGAAAGTGTG  
GGTAG  
>ASV:6169:Genus:Parvibacter  
TACGTAGGGAGCAAGCGTTATCCGGATTCATTGGGCGTAAAGCGCGTAGGCGGCTGCCTAAGCGGAACCTCTAATCCC  
AGGGCTCAACCTTGGGCGGGTTCCGAACTGGGTGGCTCGAGTGTGCGTAGAGGCAAGTGAATTCCTGGTGTAGCGGTG  
AATGCGCAGATATCGGGAAGAACACCAGTGGCGAAGGCGGCTTCTGGGCCGACACTGACGCTGAGGCGGAAAGCTGGG  
GGAGC  
>ASV:6170:Genus:Weissella  
TACGGAGGATCCGAGCGTTATCCGGATTTATTGGGCGTAAAGCGAGCGCAGACGGTTATTTAAGTCTGAAGTAAAGGCC  
TCAGCTCAACTGAGGAATTGCTTTGAAACTGGATGACTTAGTGTGAGTAGAGGAAAGTGAATTCATGTGTAGCGGTG  
AAATGCGTAGATATATGGAAGAACACCAGTGGCGAAGGCGGCTTCTGGACTGTAACGACGTTGAGGCGGAAAGCGTG  
GGGAG  
>ASV:6171:Family:Ruminococcaceae  
TACGTAGGGAGCGAGCGTTGTCCGATTTACTGGGTGTAAGGGTGCCTAGGCGGCTAGACAAGTCAGGTGTGAAATACC  
GCAGCTCAACTGCGGGGCTGCACTTGAACCTGTAGAGCTTAGTGTGAGTAGAGGAAAGTGAATTCCTAGTGTAGCGGTG  
AAATGCGTAGATATTAGGAAGAACACCAGTGGCGAAGGCGGCTTCTGGACGAAAACGACTGACGCTGAGGCGGAAAGCGTG  
GGGAG  
>ASV:6172:Species:vadensis  
TACGTAGGTGCGAGCGTTGTCCGATTTATTGGGCGTAAAGGGTCTGTAGGAGTTTGTAAATACGAGGTGAAATCCG  
GGGCTTAACCTCGGAATTGCTTTGAAACTGATGAACCTAGACTACTGGAGAGGTAAGCGGAATACCAGGTGTAGCGGTG  
GAATGCGTAGATATCTGGTAGAACCAATAGCGAAGGCGGCTTCTGGACGAAAACGACTCTGAAAGACGAAAGCATG  
GGGAG  
>ASV:6173:Kingdom:Bacteria  
TACGGAGGATGCGAGCGTTATCCGGATTTATTGGGTTTAAAGGGTGCCTAGGCGGTTTGATAAGTTAGAGGTGAAATACC  
GGTGCTTAACCCGGAACCTGCAACTAAAACCTGTTTTCTTGGTGTGAGAGGAAAGTGAATTCCTAGTGTAGCGGTG  
AAATGCGTAGATATTAGGAGGAACACCAGTGGCGAAGGCGGATTGCCGGACGACAACGACTGAGGCTGAGGCGGAAAGCGTG  
GGGAG  
>ASV:6174:Genus:Lachnospiraceae\_FE2018\_group  
TACGTAGGGGCAAGCGTTATCCGATTTACTGGGTGTAAGGGGCGTAGACGGCTGTGCAAGTCTGAAGTGAAGGCA  
TGGGCTCAACCTGTGGACTGCTTTGAAACTGTGCACTAGAGTGTGCGAGAGGTAAGTGAATTCGTGGTGTAGCGGTG  
AAATGCTTAGATATCACGAAGAACCTCCGATTGCGAAGGCGGCTTACTGGATTGTAACGACGCTGATGCTCGAAAGTGTG  
GGTAT  
>ASV:6175:Family:Ruminococcaceae  
TACGTATGGAGCAGGCGTTATCCGGATTTACTGGGTGTAAGGGTGCCTAGGTGGCAGTGAAGTCAGATGTGAAATCTC  
AGGGCTTAACCTGAAACTGCATTTGAAACTGTATGCTTGTAGTGTGCGGAGAGGTAATCGGAATTCCTTGTGTAGCGGTG  
AAATGCGTAGATATAAGGAAGAACACCAGTGGCGAAGGCGGCTGCTGGACTGTTACTGACACTGAGGCACGAAAGCGTG  
GGGAG  
>ASV:6176:Genus:Anaerofilum  
TACGTAGGGGCAAGCGTTGTCCGGAATAATTGGGCGTAAAGGGGCGTAGGCGGCTCGGTAAGTCTGGAGTAAAGTCC  
TGCTTTAAGGTGGGAATTGCTTTCAAACCTGTTTTCTTGGTGTGAGTGTGAGAGGTAAGTGAATTCCTGGTGTAGCGGTG  
GAATGCGTAGATATCGGGAGGAACACCAGTGGCGAAGGCGGCTTACTGGGCACCAACTGACGCTGAGGCACGAAAGCGTG  
GGGAG  
>ASV:6177:Family:Ruminococcaceae  
TACGTAGGTGCGAAGCGTTGTCCGGAATCACTGGGCGTAAAGCGTGCCTAGGCTGTTTTCGTAAGTCTGTGTGAAAGGCG  
CGGGCTCAACCCATGAATTGCTTTCAAACCTGTTTTCTTGGTGTGAGTGTGAGAGGTAAGTGAATTCCTGGTGTAGCGGTG  
GAATGCGTAGATATCGGGAGGAACACCAGTGGCGAAGGCGGCTTACTGGGCACCAACTGACGCTGAGGCTCGAAAGCATG  
GGTAG  
>ASV:6178:Family:Ruminococcaceae  
TACGTATGGAGCAAGCGTTATCCGGATTTACTGGGTGTAAGGGTGCCTAGGTGGCAGTGAAGTCAGATGTGAAAGGCC  
GGGGCTCAACCCCGGAGCTGCAATTTGAAACTGTTGGTCTTAGTATCGGAGAGGTGATCGGAATTCCTTGTGTAGCGGTG  
AAATGCGTAGATATAAGGAAGAACACCAGTGGCGAAGGCGGATGACTGGACGACAACGACGCTGAGGCGGAAAGTGTG

GGGAG

>ASV:6179:Genus:Rothia

TACGTAGGGCGCAGCGTTGTCCGGAATTATTGGGCGTAAAGAGCTGTAGCGGTTGGTCGCGTCTGTCTGAAAAGCT  
GGGGCTTAACCCCTGTTTTGCAGTGGGTACGGGCTAACTAGAGTGCCGTAGGGGAGACTGGAATTCCTGGCGTAGCGGTG  
GAATGCGCAGATATCAGGAGGAACACCGATGGCGAAGGCAGTCTCTGGGCTGTAACGACGCTGAGAAGCGAAAGCATG  
GGGAG

>ASV:6180:Family:Lachnospiraceae

TACGTATGGAGCAAGCGTTATCCGGATTACTGGGTGTAAGGGGAGCGTAGCGGCTCTGCAAGTCTGATGTAAAAGGCC  
GGGGCTCAACCCCGGACTGCATTGGAACCTGTCTGGCTCGAGTGCCGGAGAGGTAAGCGGAATTCCTAGTGTAGCGGTG  
AAATGCGTAGATATTAGGAAGAACACCAATGGCGAAGGCAGTCTCTGGGCCGTTACTGACGCTGGGGAGCGAAAGCGTG  
GGGAG

>ASV:6181:Genus:Veillonella

TACGTAGGTGGCAAGCGTTGTCCGGAATTATTGGGCGTAAAGCGCGCAGGCGGATCAGTCACTGTCTTAAAAGTTC  
GGGGCTTAACCCCGTATGGGATGGAACCTGTCTAGATATCGGAGAGGAAAGTGAATTCCTAGTGTAGCGGTGA  
AATGCGTAGATATTAGGAAGAACACCAAGTGGCGAAGGCAGTCTCTGGGCGTACTGACGCTGAGGCTCGAAAGCGTG  
GGAGC

>ASV:6182:Order:Clostridiales

TACGTAGGTGGCAAGCGTTGTCCGGAATTACTGGGTGTAAGGGGAGCGTAGCGGCATGGCAAGTCAAGTGTAAAATCCA  
TGGGCTCAACCCATGAACTGCATTTGAAACTGTAGATCTTGGTGTCCGGAGGGCAATCGGAATTCCTAGTGTAGCGGTG  
AAATGCATAGATATCACGCAGAACTCCGATTGCGAAGGCAGCTTACTAAACCATAACTGGCACTGAAGCACGAAAGCGTG  
GGAT

>ASV:6183:Species:brevis

TACGAAGGGTGCAAGCGTTACTCGGAATTACTGGGCGTAAAGCGTGCAGTGGTGGTTTGTAAAGTCTGATGTAAAAGGCC  
TGGGCTCAACCTGGGAATGGCATTGGATACTGGCAGGCTAGAGTGCCGTAGAGGGTAGTGAATTCCTGGTGTAGCAGTG  
AAATGCGTAGAGATCGGGAGGAACATCTGTGGCGAAGGCAGTACCTGGACCAGCACTGACACTGAGGCACGAAAGCGTG  
GGGAG

>ASV:6184:Genus:Christensenellaceae\_R-7\_group

CACGTAGGGGGCGAGCGTTGTCCGGAATGATTGGGCGTAAAGGGCGCGTAGCGGCCTGCTAAGTCTGGAGTAAAAGTCC  
TGCTTTCAAGGTGGGAATGCTTTGGATACTGGTGGGCTGGAGTGCAGGAGAGGAAAGCGGAATTCCTGGTGTAGCGGTG  
AAATGCTTAGATATCACGAAGAACTCCGATTGCGAAGGCAGCTGCTAAGCTGCAACTGACATTGAGGCTCGAAAGTGTG  
GGTAT

>ASV:6185:Family:Ruminococcaceae

TACGTAGGTGGCAAGCGTTGTCCGGAATTACTGGGTGTAAGGGGCGTGCAGCCGGGCCGATGTGATGTGAAAATCTG  
GAGGCTTAACCTCAAACCTGCATTTGAAACTGTAGGCTTTGAGTACCGGAGAGGTTATCGGAATTCCTGTGTAGCGGTG  
AAATGCTTAGATATCACGAAGAACTCCGATTGCGAAGGCAGCTTACTGGATTGTAACGACGCTGATGCTCGAAAGTGTG  
GGTAT

>ASV:6186:Family:Lachnospiraceae

TACGTAGGGGGCAAGCGTTATCCGGAATTACTGGGTGTAAGGGGAGCGTAGACGGCGCAGCAAGTCTGATGTAAAAGGCA  
GGGGCTTAACCCCTGGACTGCATTGGAACCTGTTGAGCTTGGTGCAGGAGGGTAAGCGGAATTCCTAGTGTAGCGGTG  
AAATGCATAGATATCACGCAGAACTCCGATTGCGAAGGCAGCTTACTAAACCATAACTGACACTGAAGCACGAAAGCGTG  
GGGAT

>ASV:6187:Genus:Ruminococcaceae\_UCG-003

AACGTAGGGTGCAAGCGTTGTCCGGAATTACTGGGTGTAAGGGTGCAGTGGGCAACTGCAAGTCAAGTGGTGAATCTG  
AGGGCTCAACCTCAAACCTGCATTTGAAACTGTGCATCTTGGTGCAGGAGGTAATCGGAATTCCTGTGTAGCGGTG  
AAATGCGTAGATATAAGGAAGAACACCAAGTGGCGAAGGCAGTACTGGACGGTAACTGACGCTGAGGCAGCGAAAGCGTG  
GGGAG

>ASV:6188:Order:Micavibrionales

TACGAATGGAGCGAGCGTTGTCCGGAATCACTGGGCGTAAAGCGTACGCAGGCGGCTTGAAGTCAAGTGAAGGCC  
AGGGCTTAACCCCTGGAATGCTTTTGAACCTCAAGACTAGAGTACTGGAGAGGTTGGCGGAATTCAGTGTAGCAGTG  
AAATGCGTAGATATTGAGGGAACACCGATGGCGTAGGCAGCCTACTGGACAGTAACTGACGCTCAGGTACGAAAGCGTG  
GGGAT

>ASV:6189:Genus:Erysipelotrichaceae\_UCG-003

TACGTAGGTGGCAGCGTTATCCGGAATTATTGGGCGTAAAGAGGGAGCAGGCGGCACTAAGGGTCTGTGGTAAAAGATC  
GAAGCTTAACCTCGGTAAGCCATGGAACCGTAGAGCTAGAGTGTGTGAGAGGACCGTGAATTCCTATGTGTAGCGGTGA  
AATGCTTAGAGATCATACAGAACACCGATTGCGAAGGCAGCTTACCAAACTATATCTGACGTTGAGGCACGAAAGCGTG  
GGAGC

>ASV:6190:Family:Lachnospiraceae

AACGTAGGTCACAAGCGTTGTCCGGAATTACTGGGTGTAAGGGGAGCGCAGACGGTAAAGCAAGTCTGAAGTAAAAGCCC  
GGGGCTCAACCCCGGACGGCTTTTGAACCTGCCCTGCTTATTACAGGAGAGGTAAGCGGAATTCCTAGTGTAGCGGTG  
AAATGCGTAGATATTAGGAGGAACACCAAGTGGCGAAGGCAGCTACTGGCACCAACTGACGCTGAGGCTCGAAAGTGTG  
GGTAG

>ASV:6191:Family:Lachnospiraceae

TACGTAGGGGGCAAGCGTTATCCGGAATTACTGGGTGTAAGGGGAGCGTAGACGTTTTGCAAGTCTGAAGTAAAAGCCC  
GGTGTAAACCCCGGACTGCTTTGGAACCTGGTCACTAGAGTGTCCGGAGGGTAAGTGAATTCCTAGTGTAGCGGTG  
AAATCCGTAGATATCTGAGGGAACACCGTGGCGAAGGCAGCCACCTGGACGGTAACTGACGCTGAGGTGCGAAAGCGTG  
GGTAG

>ASV:6192:Genus:Bacteroides

TACGTATGGGGCAAGCGTTGTCCGGAATTACTGGGTGTAAGGGGCGTGCAGCCGGTCTGCAAGTCAAGTGTGAAAAGTTT



CGGGCTCAACCGTAAAATTGCAGTTGATACTGGTAGTCTTGAGTACAGTAGAGGTAGGCGGAATTCGTGGTGTAGCGGTG  
AAATGCTTAGATATCACGAAGAACCCTCGATTGCGAAGGCAGCCTGCTAAGCTGCAACTGACATTGAGGCTCGAAAGTGTG  
GGTAT  
>ASV:6193:Genus:Stomatobaculum  
TACGTAGGGGGCAAGCGTTATCCGGATTTACTGGGTGTAAGGGGAGCGCAGACGGTTGCGCAAGTCTGAAGTAAATCCC  
GAGGCTTAACCACGGGACTGCTTTGAAACTGTGCGACTTGAGTATCGGAGGGGAGCGGGAATTCCTAGTGTAGCGGTG  
AAATGCGTAGATATTAGGAAGAACCCTGGTGGCGAAGGCGGCTGCTGGACGAAAACGACGTTGAGGCTCGAAGGCGTG  
GGGAG  
>ASV:6194:Genus:Bacteroides  
TACGTAGGGGGCAAGCGTTATCCGGAATTACTGGGTTAAAGGGTGCCTAGGTGGTATTAAAGTACAGCGGTGAAAGTTT  
GTGGCTCAACCATAAAATTGCAGTTGAAACTGGGAGTCTTGAGTACAGTAGAGGTGGGCGGAATTCGTGGTGTAGCGGTG  
AAATGCTTAGATATCACGAAGAACCCTCGATTGCGAAGGCAGCCTGCTAAGCTGCAACTGACATTGAGGCTCGAAAGTGTG  
GGTAT  
>ASV:6195:Order:Clostridiales  
TACGTATGGTCAAGCGTTGTCGGAATTACTGGGTGTAAGGGGAGCGTAGGCGGGTTGTTAAGTACAGTTGTGAAAGTTT  
GCGGCTCAACCGTAAAATTGCAGTTGATACTGGCGACCTTGAGTGCAACAGAGGTAGGCGGGAATTCGTGGTGTAGCGGTG  
AAATGCGTAGATATTAGGAGGAACACCAGTGGCGAAGGCGGCTTACTGGACTGTAACGACACTGAGGCTCGAAAGCGTG  
GGGAG  
>ASV:6196:Family:Lachnospiraceae  
TACGTAGGGGGCAAGCGTTAACCGGATTTACTGGGTGTAAGGGGAGCGCAGACGGCGATGCAAGTCTGGAGTAAAGCCC  
GGGGCTCAACCTGGGACTGCTTTGAAACTGTATGGCTAGAGTGTGGAGAGGGTGGCGGGAATTCAGGTGTAGGAGTGT  
AAATCCGTAGATATCTGGAGGAACACCAGTGGCGAAGGCGCCACCTGGACGGTAACGACGCTGAGGTGCGAAAGCGTG  
GGTAG  
>ASV:6197:Family:Ruminococcaceae  
TACGGAGGATGCGAGCGTTGTCGGAATTACTGGGTGTAAGGGGCGTGTAGCGGGAAGGCAAGTACAGTGTGAAATCCA  
CGGGCTCAACTCGTGAAGTGCATTTGAAACTGTTTTCTTGAGTATCGGAGAGGCAATCGGAATTCAGTGTAGCGGTG  
AAATGCGTAGATATTGGGAGGAACACCAGTGGCGAAGGCGCCTTCTGGACTGTGTGACGCTGAGATGCGAAAGCCAG  
GGTAG  
>ASV:6198:Order:Bacteroidales  
TACGGAGGATCCGAGCGTTATCCGGATTTATTGGGTTAAAGGGGAGCGTAGATGGATGTTAAGTACAGTTGTGAAAGTTT  
GCGGCTCAACCGTAAAATTGCAGTTGATACTGGATATCTTGAGTGCAGTTGAGGTAGGTGGAATTCCTGGTGTAGCGGTG  
GAATGCGTAGATATCGGAAGAACCAGTGGCGAAGGCAGCCTGCTGGGCCCCACTGACGCTGAGGCTCGAAAGCTGTG  
GGGAG  
>ASV:6199:Order:Clostridiales  
TACGTAGGGGGCGAGCGTTGTCGGAATTACTGGGCGTAAAGGGGAGCGTAGGCGGTTTATTAAGTACAGTGTGAAATACC  
CGGGCTTAACCTGGGGGTGCATCTGATACTGGTGAAGTGTGCGGGAGAGGAAAGTGGAAATTCCTAGTGTAGCGGTG  
AAATGCGTAGATATTAGGAGGAACACCAGTGGCGAAGGCGACTTCTGGACCGTAACGACGCTGAGGCTCGAAAGCGTG  
GGGAG  
>ASV:6200:Family:Lachnospiraceae  
TACGTAGGGGGCAAGCGTTATCCGGATTTACTGGGTGTAAGGGGAGCGTAGACGGCGAGACAAGTCTGAAGTAAAGCCC  
GGGGCTCAACCCATGAAGTGCATTTGAAACTGTAGATCTTGAGTGTGCGGAGGGGCAATCGGAATTCCTAGTGTAGCGGTG  
AAATGCGTAGATATTAGGAGGAACACCAGTGGCGAAGGCGACTATCTGGCTGTATATTGACGCTGAGGCTCGAAAGCATG  
GGGAT  
>ASV:6201:Family:Ruminococcaceae  
TACGGAGGGTCAAGCGTTAATCCGGAATTACTGGGCGTAAAGGCGCACGAGGCGGTTTGTAAAGTACAGTGTGAAATCCA  
TGGGCTCAACCCATGAAGTGCATTTCAAACCTGGTGTGCTTGAGTAGTGCAGAGGTAGGCGGGAATTCCTGGTGTAGCGGTG  
GAATGCGTAGATATCGGGAGGAACACCAGTGGCGAAGGCGGCTTCTGGACTGAAACTGACGCTGAGGCTCGAAGGTGTG  
GGTAG  
>ASV:6202:Family:Ruminococcaceae  
TACGTAGGTGGCGAGCGTTGTCGGAATTACTGGGTGTAAGGGGAGTGTAGGCGGGAAGGCAAGTACAGAGTAAAATTA  
TGGGCTTAACCTGGGACTGCATTGAAACTGTCTGGCTCGAGTGCCGGAGAGGTAGCGGGAATTCCTAGTGTAGCGGTG  
AAATGCGTAGATATTAGGAAGAACCAGTGGCGAAGGCGGCTTCTGGACTGAAACTGACGCTGAGGCTCGAAAGCGTG  
GGGAG  
>ASV:6203:Genus:Erysipelotrichaceae\_UCG-003  
TCCTTCTTTTCTCTCTTTCTCTTCTTCTTGGGCGTAAAGAGGGAGCAGGCGGCACTAAGGGTCTGTGGTAAAGATC  
GAAGCTTAACCTCGGTAAGCCATGAAACCGTAGAGCTAGAGTGTGTGAGAGGATCGTGGAAATTCATGTGTAGCGGTG  
AATGCGTAGATATATTGAGGAACACCAGTGGCGAAGGCGACGATCTGGCGCATAACTGACGCTCAGTCCCAGAAAGCGTGTG  
GGAGC  
>ASV:6204:Order:Clostridiales  
TACGTAGGGGGCGAGCGTTGTCGGAATTACTGGGCGTAAAGGGTGCCTAGGCGGCCCTGCAGGTGAGTGTGAAATACC  
CGTGGCTTAACATGGGGGCTGCATTTGAAACCTAGGGCTTGAGTGTGGAAGAGGTAAAGTGGAAATTCCTGGTGTAGCGGTG  
AAATGCGTAGAGATCGGGAGGAACACCAGTGGCGAAGGCGGCTTACTGGACGGTAACGACGTTGAGGCTCGAAAGCGTG  
GGGAG  
>ASV:6205:Family:Enterobacteriaceae  
TACGTAGGGGGCGAGCGTTGTCGGAATTACTGGGCGTAAAGGGGCGCTAGGCGGCCAATTAAGTTAGATGTGAAATCCC  
TGGGCTTAACCTGGGTTGCTGATTTGAAACCTGATAGGCTTGAGTCTGCTAGAGGGGGGTAGAATTCAGGTGTAGCGGTG  
AAATGCGTAGAGATCTGGAGGAATACCAGTGGCGAAGGCGGCCCCCTGGACGAAGACTGACGCTCAGGTGCGAAAGCGTG  
GGGAG

>ASV:6206:Class:Bacteroidia  
TACGGAGGATCCAAGCGTTATCCGGATTTATTGGGTTAAAGGGAGCGTAGATGGATGTTTAAAGTCAGTTGTGAAAGTTT  
CGGGCTCAACCGTAAAATTGCAGTTGATACTGGGTGCTTGGAGTACAGTAGAGGCAGGCGGAATTCCTAGTGTAGCGGTG  
AAATGCGTAGATATTGGGAGGAACACCAAGTGGCGAAGGCGCCTTTCTGGACTGTGTCTGACGCTGAGATACGAAAGCCAG  
GGTAG

>ASV:6207:Family:Veillonellaceae  
TACGTAGGTGGCAAGCGTTGTCCGGAATTATTGGGCGCAAAGCGCGCAGGCGGCTTCTTAAAGTCCATCTTAAAAGTGC  
GGGGCTTAACCCGGGCTGCATCTGATACTGTCAGACTTGAGTGCAGGGGAGGAAAGCGGAATTCCTAGTGTAGCGGTG  
AAATGCGTAGATATTAGGAGGAACACCAAGTGGCGAAGGCGGCTTTCTGGACTGTAAGTACGCTGAGGCACGAAAGCGTG  
GGGAG

>ASV:6208:Genus:Cuneatibacter  
TACGGAGGATCCGAGCGTTATCCGGATTTATTGGGTTAAAGGGAGCGCAGACGGGTTTTTAAAGTCAGCTGTGAAAGCCC  
GGGGCTCAACCCGGGCTGCATCTGATACTGTCAGACTTGAGTGCAGGGGAGGAAAGCGGAATTCCTAGTGTAGCGGTG  
AAATGCGTAGATATTAGGAGGAACACCAAGTGGCGAAGGCGGCTCTCTGGTCTGTAAGTACGCTGAGGTTTCAAAGCGTG  
GGTAG

>ASV:6209:Family\_XIII\_UCG-001  
TACGGAGGATCCGAGCGTTATCCGGATTTATTGGGCGTAAAGAGTACGTAGGCGGTTTGTCTAAGCGCAAGGTGAAAGGCA  
GTGGCTTAACCGTAAATTGCAAGCTTGGAACTGACAGACTTGAGTGCAGGAGAGGAAAGCGGAATTCCTAGTGTAGCGGTG  
AATGCGTAGATATTAGGAGGAACACCGGTGGCGAAGGCGGCTACTGGGCACCAACTGACGCTGATGCTCGAAAGTGTGG  
GTATC

>ASV:6210:Genus:Bacteroides  
TACGTATGGAGCAAGCGTTATCCGGATTTACTGGGTGTAAGGGAGGTAGGTGGTATCACAAGTCAGAAGTAAAAGCCC  
GGGGCTCAACCCGGGACTGCTTTGAAACTGCTGGTGTCTTGGAGTACAGTAGAGGCAGGCGGAATTCGTGGTGTAGCGGTG  
AAATGCTTAGATACCACGAAGAAGTCCGATTGCGAAGGCAGCTGCTAAGCTGCAACTGACATTGAGGCTCGAAAGTGTG  
GGTAT

>ASV:6211:Family:Ruminococcaceae  
TACGTAGGGAGCGAGCGTTGTCCGGAATTACTGGGTGTAAGGGAGCGTAGGCGGGAAGACAAGTTGGGTGTCAAATCTA  
CCGGCTTAACCCGGTAGCCGACTCAAAGTGTCTTTCTTGGAGTAAAGTAGAGGTTGGCGGAATTCGTGGTGTAGCGGTG  
AATGCTTAGATATCACGAAGAAGTCCGATTGCGAAGGCAGCTTACTGGACTGTAAGTACGCTGATGCTCGAAAGTGTGG  
GTATC

>ASV:6212:Family:Lachnospiraceae  
TACGGAAGGTCCGGGCTTATCCGGATTTACTGGGTGTAAGGGAGCGTAGACGGCGAGACAAGTCTGAAGTAAAAGCCC  
GGGGCTCAACCCGGGACTGCTTTGAAACTGCCTTGTAGAGTGCAGGAGGGGTAAGCGGAATTCCTAGTGTAGCGGTG  
AAATGCATAGATATGACGCAGAAGTCCGATTGCGAAGGCAGCATACCAACTCGGACTGACGCTGAGGCTCGAAAGCGTG  
GGTAT

>ASV:6213:Order:Clostridiales  
TACGTAGGGGGCGAGCGTTGTCCGGAATTACTGGGCGTAAAGGGTGCCTAGGCGGTTTGGTAAAGTTGGATGTGAAATACC  
CGGGCTCAACTCGTGAAGTGCATTTGAAACTACTCTTCTTGGAGTATCGGAGAGGCAATCGGAATTCCTAGTGTAGCGGTG  
AAATGCGTAGATATCGGGAGGAACACCAAGTGGCGAAGGCGGCTACTGGGCACCAACTGACGCTGAGGCTCGAAAGTGTG  
GGTAG

>ASV:6214:Order:Desulfovibrionales  
TACGGAGGGTGCAGCGTTAATCGGAATTACTGGGCGTAAAGCGCACGTAGGCTGTATATCAAGTCAAGGGTAAAATCCC  
CGGGCTCAACTGGGAACTGCCTTTGAAACTGGTAAACTGGAGTATGTGAGAGGGTGGCGGAATTCCTGGTGTAGCGGTG  
GAATGCGTAGATATCGGGAGGAACACCAAGTGGCGAAGGCGGCTGCTGGGCTTAACTGACGCTGAGGCACGAAAGCGTG  
GGTAG

>ASV:6215:Genus:Megasphaera  
TACGTAGGTGGCAAGCGTTGTCCGGAATTATTGGGCGTAAAGGGCGCGCAGGCGGCATCGCAAGTCCGTCTTAAAAGTGC  
GGGGCTTAACCCCGTGAAGGGACCGAAACTGTGAAGTCTGAGTGTGCGAGAGGAAAGCGGAATTCCTGGTGTAGCGGTG  
AATGCGTAGATATCGGGAAGAACCAATGGCGAAGGCAGGCTCTGGGCCGTTACTGACGCTGAGGAGCGAAAGCGTG  
GGAGC

>ASV:6216:Family:Lachnospiraceae  
TACGTAAAGGGCAAGCGTTATCCGGATTTACTGGGTGTAAGGGAGCGTAGACGGCGAAGCAAGTCTGAAGTAAAACCC  
AGGGCTCAACCCGGGACTGCTTTGAAACTGTTTTGCTAGAATGTCGGAGAGGTAAGTGGAAATTCCTAGTGTAGCGGTG  
AAATGCGTAGATATCGGGAAGAACACCGATGGCGAAGGCAGCTGCTGGGCCCCACTGACGCTGAGGCAGCAAGCTGG  
GGGAG

>ASV:6217:Family:Lachnospiraceae  
TACGTAGGGGGCAAGCGTTATCCGGATTTACTGGGTGTAAGGGTGCCTAGGTTGGCATGGTAAAGTCAAGTAAAAGCCC  
GGGGCTTAACCCGGAAGTGCCTTTGAAACTGTCATGCTGGAGTGCAGGAGAGGTAAGCGGAATTCCTGGTGTAGCGGTG  
AAATGCGTAGAGATCGGGAGGAACACCAAGTGGCGAAGGCGGCTACTGGGCTTAACTGACGCTGAGGCACGAAAGCATG  
GGTAG

>ASV:6218:Family:Bifidobacteriaceae  
TACGGAGGATCCGAGCGTTATCCGGATTTATTGGGTTAAAGGGAGCGTAGGTGGATTTAAAGTCAGTTGTGAAAGTTT  
CGGGCTCAACCGTAAAATTGCAGTTGAAACTGGAGGACTTGAGTGCAGGAGGGGAGACTGGAATTCCTGGTGTAAAGCGTG  
GAATGCTTAGATATCGGGAAGAACACCAATGGCGAAGGCAGGCTCTGGGCCGTTACTGACGCTGAGGAGCGAAAGCGTG  
GGGAG

>ASV:6219:Genus:Oscillospira  
TACGGAGGATCCGAGCGTTATCCGGATTTACTGGGTGTAAGGGCGTGCAGCCGGGCGGCAAGTCAAGTGTGAAATCCA  
CGGGCTTAACCCGTGAAGTGCATTTGAAACTGTTGGTCTTGGAGTATCGGAGAGGTAATCGGAATTCCTGTGTAGCGGTG

AAATGCGTAGATATCACGAAGAACTCCGATTGCGAAGGCAGCCTGCTAAGCTGCAACTGACATTGAGGCTCGAAAGTGTG  
GGTAT  
>ASV:6220:Class:Actinobacteria  
TACGTAGGTGGCGAGCGTTTCCGGATTTACTGGGCGTAAAGGGAGCGTAGGCGGACTTTTAAAGTGAGATGTGAAATACC  
CGGGCTCAACTTGGGCGCTGCATTTCAAAGTCTAGAGTGCAGGAGAGGAGAATGGAATTCGCGGTGTAAACGGTG  
GAATGTGTAGATATCGGGAAGAACACCAATGGCGAAGGCAGTCTCTGGGCCGTTACTGACGCTGAGGAGCGAAAGCGTG  
GGGAG  
>ASV:6221:Genus:Leptotrichia  
TACGTATGTCGCGAGCGTTATCCGGAATTATTGGGCATAAAGGGCATCTAGGCGGCCTTTCAAGTCAGGGGTGAAAACCT  
GCGGCTCAACCCGAGGCTGCCTTTGAAACTGATAGGCTGGAGTACCGGAGAGGTGGACGGAAGTGCACGAGTAGAGGTG  
AAATTCGTAGATATGTGCAGGAATGCCGATGATGAAGATAGTTCACTGGACGTTAAGTGCACGCTGAAGTGCAGAAAGCGTG  
GGGAG  
>ASV:6222:Family:Lachnospiraceae  
TACGTAGGGGGCAAGCGTTATCCGGATTTACTGGGTGTAAGGGAGCGTAGACGTTGTGCAAGTCTGATGTGAAATCC  
AGGGCTTAACCTGGACCTGCATTGAAACTGTATACTAGAGTGTCCGAGAGGTGAGTGGAAATTCGTGGTGTAGCGGTG  
AAATGCTTAGATATCACGAAGAACTCCGATTGCGAAGGCAGCTTCTGGACTGTAAGTGCACGCTGATGCTCGAAAGTGTG  
GGTAT  
>ASV:6223:Family:Lachnospiraceae  
TACGTAGGGGGCAAGCGTTATCCGGATTTACTGGGTGTAAGGGAGCGTAGGTGGCAAGGCAAGCCAGAAGTGAGAACC  
GGGGCTTAACCCCGCGATTGCTTTTGAAGTGTCTGGCTGGAGTGCAGGAGGGGCGAGGCGGAATTCCTAGTGCAGCGGT  
GAAATGCTTAGATATCACGAAGAACTCCGATTGCGAAGGCAGCTCACTGGAGTGAAGTGCACGCTGATGCTCGAAAGTGT  
GGTA  
>ASV:6224:Family:Clostridiaceae\_1  
TACGTAGGTGGCGAGCGTTTCCGGATTTACTGGGCGTAAAGGGAGCGTAGGCGGACTTTTAAAGTGAGATGTGAAATACC  
CGGGCTCAACTTGGGTGCTGCATTTCAAAGTCTAGAGTGCAGGAGAGGATCGTGGAAATTCATGTGTAGCGGTG  
AAATGCGTAGATATATGGAGGAACACCAGTGGCGAAGGCAGCGCTGCTGGCTGTAAGTGCACGCTCATTCGAAAGCGTG  
GGGAG  
>ASV:6225:Family:Lachnospiraceae  
TACGTAGGTGGCAAGCGTTTCCGGATTTACTGGGTGTAAGGGAGCGTAGACGTTGTGCAAGTCTGATGTGAAATCC  
AGGGCTTAACCTGGACCTGCATTGAAACTGTATACTAGAGTGTCCGAGAGGTGAGTGGAAATTCCTAGTGTAGCGGTG  
AAATGCGTAGATATCGGGTGGAAACCCGTTGGCGAAGGCAGCGCTCTGGGCCGAGACCGACGCTGAGGCGCAAGGCTGTG  
GGGAG  
>ASV:6226:Genus:Anaerostipes  
CACGTAGGGGGCAAGCGTTATCCGGAATTACTGGGTGTAAGGGTGCCTAGGTGGTATGGCAAGTCAAGTGAAGAACCC  
AGGGCTTAACCTGGGACTGCTTTTGAAGTGTGAGACTGGAGTGCAGGAGAGGTAAGCGGAATTCCTAGTGTAGCGGTG  
AAATGCGTAGATATCTGGAAGAACACCAAGGCGAAGGCAGTCTCTGGGCAAACTGACGCTCATATGCGAAAGCGTG  
GGTAG  
>ASV:6227:Genus:Allisonella  
TACGTAGGTCCCGAGCGTTTCCGGATTTACTGGGCGTAAAGCGCGCAGGCGGCCGTGCAAGTCCATCTTAAAGCGT  
GGGGCTTAACCCCATGAGGGGATGAAACTGCAGGGCTGGAGTGTCCGAGGGGAAAGTGGAAATTCCTAGTGTAGCGGTG  
AATGCGTAGAGATTAGGAAGAACTCCGATTGCGAAGGCAGCTGCTAAGCTGCAACTGACATTGAGGCTCGAAAGTGTG  
GTATC  
>ASV:6228:Family:Lachnospiraceae  
TACGTAGGGTCAAGCGTTTCCGGATTTACTGGGTGTAAGGGAGCGCAGGCGGACCGGCAAGTTGGAAGTGAAGCCC  
GGGGCTCAACCCCGGATTGCAATTTGAAACTGCTGAGCTAGAGTGTCCGAGAGGCAAGTGGAAATTCCTAGTGTAGCGGTG  
AAATGCGTAGATATTAGGAGGAACACCAGTGGCGAAGGCAGCGCTGCTGGACTGTTACTGACACTGAGGCACGAAAGCGTG  
GGGAG  
>ASV:6229:Family:Coriobacteriaceae  
TACGTAGGGGGCAAGCGTTATCCGGATTTACTGGGTGTAAGGGAGCGTAGACGGCGTGCAAGTCTGATGTGAAAGGCA  
TGGGCTCAACCCCGAAGCCCGGAACTCCGCGGCTGGGTCCGGTAGGGGAGGGTGGAAACCCCGGTGTAGCGGTG  
GAATGCGCAGATATCGGGTGGAAACCCGTTGGCGAAGGCAGCGCTCTGGGCAACACTGACGCTGAGGCTCGAAAGTGTG  
GGTAG  
>ASV:6230:Family:Pasteurellaceae  
AACGTAGGTCAAGCGTTTCCGGATTTACTGGGTGTAAGGGCACGAGGCGGTGACTTAAAGTGAGGTGTGAAAGCCC  
CGGGCTTAACCTGGGAATTGCATTTCACTAGGCTGCTAGAGTACTTTAGGGAGGGGTAGAATTCACGCTGTAGCGGTG  
AAATGCGTAGATATTAGGAGGAACATCAGTGGCGAAGGCAGCTTACTGGACGAAGACTGACGCTCAGGTGCGAAAGCGTG  
GGTAT  
>ASV:6231:Family:Ruminococcaceae  
TACGTAGGGAGCAAGCGTTTCCGGATTTACTGGGTGTAAGGGTGCCTAGGCGGCTTTGCAAGTCAAGTGTGAAATCTA  
TGGGCTCAACCCATAGCCTGCATTTGAAACTGCTGATCTAGAGTATCGGAGAGGAAAGTGGAAATTCCTAGTGTAGCGGTG  
AAATGCGTAGATATTAGGAAGAACACCAGTGGCGAAGGCAGCTTCTGGACGAAAACGACGCTGAGGCGCAAGGCGGAG  
GGGAG  
>ASV:6232:Species:saburreum  
TACGTAGGGGGCAAGCGTTATCCGGATTTACTGGGTGTAAGGGAGCGCAGACGGCCAAGCAAGTCTGAAGTGAATGCA  
TGGGCTCAACCCATGAATGCTTTGAAACTGTTTGGCTTGGAGTGTCCGAGGGGTAAGCGGAATTCCTAGTGTAGCGGTG  
AAATGCGTAGATATTAGGAGGAACCCGAGGCGAAGGCAGCTTACTGGACGAAAACGACGCTTGGGCTCGAAGGCGGTG  
GGGAG  
>ASV:6233:Genus:Oscillibacter

TACGTAGGGAGCAAGCGTTGTCCGGATTTACTGGGTGTAAAGGGTGCCTAGGCGACTTTGCAAGTCAGATGTGAAATCTA  
TGGGCTCAACCCATAGCCTGCATTTGAAACTGTAGGTCTTGAGTACCGGAGAGGTTATCGGAATTCCTTGTGTAGCGGTG  
AAATGCGTAGATATAAGGAAGAACCACCGTGGCGAAGGCGGATAACTGGACGGCAACTGACGGTGAGGCGCGAAAGCGTG  
GGGAG

>ASV:6234:Family:Ruminococcaceae

TACGTAGGGAGCAAGCGTTGTCCGGATTTACTGGGTGTAAAGGGTGCCTAGGCGGCTTTGCAAGTCAGATGTGAAAGCTA  
TGGGCTCAACCCATAGCCTGCATTTGAAACTGCGGTTCTTGAGTACTGGAGAGGCAGACGGAATTCCTAGTGTAGCGGTG  
AAATGCGTAGATATTAGGAGGAACACCGTGGCGAAGGCGGCTCTCTGGTCTGTAACGACGCTGAGGCTCGAAAGCGTG  
GGGAG

>ASV:6235:Family:Lachnospiraceae

TACGGAGGATCCGAGCGTTATCCGGATTTACTGGGTGTAAAGGGAGCGTAGGCGGCATGGCAAGTCAGAAGTGAAAGCCT  
GGGGCTCAACCCGGAATTGCTTTTAAACTGTGAGGCTAGAGTGTGCGGAGGGGTAAGCGGAATTCCTAGTGTAGCGGTG  
AAATGCGTAGATATTAGGAGGAACACCGTGGCGAAGGCGACGGTCTGGCCTGTAACGACGCTCATTCGAAAGCGTG  
GGGAG

>ASV:6236:Family:Ruminococcaceae

TACGTAGGTGGCAAGCGTTGTCCGGATTTACTGGGTGTAAAGGGCGTGTAGCCGGGAAGGCAAGTCAGATGTGAAATCCA  
CGGGCTCAACTCGTGAAGTGCATTTGAAACTGTTTTCTTGAGTATCGGAGAGGCAGTCGGAATTCCTAGTGTAGCGGTG  
AAATGCTTAGATATCACGAAGAACCAGTGGCGAAGGCGAGCTTACTGGATTGTAACGACGCTGATGCTCGAAAGTGTG  
GGTAT

>ASV:6237:Order:Clostridiales

TACGTAGGGAGCAAGCGTTGTCCGGATTTACTGGGTGTAAAGGGTGCCTAGGCGGCCGATCAAGTCAGGTGTGAAAGACC  
CGTGCTTAACATGGGGGTTGCATTTGAAACTGGTTGGCTTGAGTATGGGAGAGGCAAGCGGAATTCGCGGTGTAGCGGTG  
AAATGCGTAGAGATCGGGAGGAACACCAAGTGGCGAAGGCGGCTTCTGGACAAAACGACGCTGAGGCACGAAAGCGTG  
GGTAG

>ASV:6238:Genus:Pseudoflavonifactor

TACGTAGGGAGCAAGCGTTATCCGGATTTACTGGGTGTAAAGGGAGCGTAGACGGTGTGCAAGTCTGATGTGAAAAGTGT  
GGGGCTCAACCTCCAGCCTGCATTTGAAACTGTAGTCTTGAGTGTGAGAGGCAATCGGAATTCGCGGTGTAGCGGTG  
AAATGCGTAGATATACGGAGGAACACCAAGTGGCGAAGGCGAGCTTACTAACCTGTAACGACATTGATGCTCGAAAGTGTG  
GGTAT

>ASV:6239:Family:Bifidobacteriaceae

AACGTAGGTCAACAAGCGTTGTCCGGAATTTACTGGGTGTAAAGGGAGCGCAGGCGGTGCGGCAAGTCTGATGTGAAAGCCC  
GGGGCTCAACCCGGTACTGCATTTGAAACTGTGACTAGAGTGTGCGGAGGGTAGGCGGAATTCGCGGTGTAGCGGTG  
GAATGTGTAGATATCGGGAAGAACAACCAATGGCGAAGGCGAGTCTCTGGGCCGTTACTGACGCTGAGGAGCGAAAGCGTG  
GGGAG

>ASV:6240:Order:Bacteroidales

TACGTAGGGGCTAGCGTTATCCGGAATTTACTGGGCGTAAAGGGTGCCTAGGCGGACGCTTAAGTCAGTTGTGAAAGTTT  
GCGGCTCAACCGTAAAATTGCAGTTGATACTGGGTGTCTTGAGTACAGTAGAGGCGAGCGGAATTCGTTGGTGTAGCGGTG  
AAATGCTTAGATATTAGGAGGAACACCAAGTGGCGAAGGCGGCTGCTGGGCTTAACTGACGCTGAGGCACGAAAGCGTG  
GGTAG

>ASV:6241:Order:Bacteroidales

TACGGAGGATCCGAGCGTTATCCGGATTTATTGGGTTAAAGGGTGCCTAGGCGGGTTGTTAAGTCAGTTGTGAAAGTTT  
GCGGCTCAACCGTAAAATTGCAGTTGATACTGGGACCTTGAGTGCAGAGAGGTAGGCGGAATTCGTTGGTGTAGGGGTG  
AAATCCGTAGATATCAAGAAGAATACCTATTGCGAAGGCGATCTGCTGGAACCTAACTGACGCTAATGCGTGAAGCGTG  
GGGAG

>ASV:6242:Genus:Succiniclasticum

TACGTAGGTGGCAAGCGTTATCCGGAATTTACTGGGCGTAAAGCGCATGTAGGCGGTTTGGTAAGTCGGTCTGAAAATGC  
GGTGCTTAACCGTAAAGTGGCGATCGAAACTGCGGAACCTTGAGTGCAGGAGAGGAAAGGGGAACCTCTCAGTGTAGCGGTG  
AATGCGTAGATATTGGGAAGAACAACCGATGGCGAAGGCGAGTCTCTGGGCCGCTACTGACGCTGAGGAGCGAAAGCGTG  
GGAG

>ASV:6243:Order:Lactobacillales

TACGGAGGATCCGAGCGTTATCCGGATTTACTGGGTGTAAAGGGAACGACGCGGCTTTTAAAGTCTGATGTGAAAGCCT  
TCGGCTTAACCGGAGTAGTGCAATTTGAAACTGGAAGACTTGAGTGCAGAAAGGAGAGTGGAACCTCCATGTGTAGCGGTG  
AAATGCGTAGATATTAGGAGGAACACCAAGTGGCGAAGGCGGCTTCTGGACAGTAACTGACGTTGAAGCTCGAAAGCGTG  
GGGAG

>ASV:6244:Genus:Bilophila

TACGGAGGTTGCAAGCGTTAATCGGAATCACTGGGCGTAAAGCGCACGTAGGCGGCTTGGTATGTCAGGGGTGAAATCCC  
ACAGCCCAACTGTGGAAGTGCATTTGATACTGCCAGGCTTGAGTACCGGAGAGGGTGGCGGAATTCAGGTGTAGGAGTG  
AAATCCGTAGATATCACGAAGAACCAGTGGCGAAGGCGAGCTTACTAAACCATAACTGACACTGAAGCACGAAAGCGTG  
GGGAT

>ASV:6245:Order:Clostridiales

TACGTATGGTCAAGCGTTATCCGGATTTACTGGGTGTAAAGGGAGCGCAGGCGGTGCGGCAAGTCTGAAGTGAATCCA  
TGGGCTTAACCCATGAACTGCTTTTAAACTGTTAGTCTTGAGTGAAGTAGAGGTAGGCGGAATTCGCGGTGTAGCGGTG  
AAATGCGTAGAGATTAGGAAGAACAACCGTGGCGAAGGCGACTTCTGGACGAAAACGACGCTGAGGCGCGAAAGCGTG  
GGGAG

>ASV:6246:Family:Lachnospiraceae

TACGTATGGAGCAAGCGTTATCCGGATTTACTGGGTGTAAAGGGTGCCTAGGTGGCGGTGCAAGTCAGATGTGAAAGGCT  
GGGGCTCAACCCGAGCTGCATTTGAAACTGCGCGGCTAGAGTACAGGAGAGGCAGGCGGAATTCCTAGTGTAGCGGTG  
AAATGCGTAGATATCGAGAGGAACACTCGTGGCGAAGGCGGTTCTGGACATTAACGACGCTGAGGCACGAAAGCCAG

GGGAG

>ASV:6247:Genus:Ruminiclostridium\_5

TACGGAGGATCCGAGCGTTATCCGGATTTATTGGGTTAAAGGGTGCCTAGGCGGATTGGCAAGTCAGAAGTAAAATCCA  
TGGGCTTAACCCATGAACTGCTTTTGAAGTCTTAGTCTTAGTGAAGTAGAGGTAGCGGAAATCCCGGTGTAGCGGTG  
AAATGCGTAGATATTAGGAAGAACCAGTGGCGAAGGCGGCTTTCTGGACTGAAACTGACGCTGAGGCTCGAAAGCGTG  
GGGAG

>ASV:6248:Phylum:Firmicutes

TACGTAGGGAGCGAGCGTTGTCCGGAATTACTGGGTGTAAGGGGAGCGTAGACGGACTGGCAAGTCTGATGTGAAAGGCG  
GGGGCTCAACCCCTGGACTGCATTGGAAGTCTTAGTCTTAGTGCAGGAGAGGATCGTGAATCCATGTGTAGCGGTG  
AAATGCGTAGATATATGAGGAACACCAGTGGCGAAGGCGACGGTCTGGCTGTAAGTACGCTCATTCCGAAAGCGTG  
GAGAG

>ASV:6249:Kingdom:Bacteria

TACGTAGGGAGCGAGCGTTGTCCGGAATTACTGGGCTAAAGGGGCGCTAGGCGGCCAATTAAGTTAGATGTGAAATCCC  
CGGGCTTAACCTGGGTGTTGCAATTTAAAGTCTTAGTGCAGGAGAGGTGGCGGAAATTCGTGGTGTAGCGGTG  
AAATGCTTAGATATCACGAAGAACTCCGATTGCGAAGGCAGCTCACTGGAGTGAAGTACGCTGATGCTCGAAAGTGTG  
GGTAT

>ASV:6250:Family:Lachnospiraceae

TACGTAGGGGGCAAGCGTTATCCGGATTTACTGGGTGTAAGGGGAGCGTAGACGGCACAGCAAGTCTGAAGTAAAATCCC  
CGGGCTCAACCCGGAACTGCTTTGGAAGTCTTAGTGCAGGAGAGGAAAGCGGAAATTCCTAGTGTAGCGGTG  
AAATGCGTAGATATAAGGAAGAACCAGTGGCGAAGGCGGATAACTGGACGGCAACTGACGCTGAGGCGCGAAAGCGTG  
GGGAG

>ASV:6251:Genus:Asaccharospora

TACGTAGGGGGCTAGCGTTATCCGGATTTACTGGGCTAAAGGGTGCCTAGGCGGCTTTTAAAGTACAGAGTAAAAGGCT  
ACGGCTCAACCGTAAAATGCAATTTGAAAGTCCCAATCTAGAGTACCGGAGGGGTAAGTGAATTCCTAGTGTAGCGGTG  
AAATGCGTAGAGATGGGGAGGAACACCAGTGGCGAAGGCGGCTGCTGGCTTAACTGACGCTGAGGCACGAAAGCGTG  
GGTAG

>ASV:6252:Family:Ruminococcaceae

TACGGAGGATCCGAGCGTTATCCGGATTTATTGGGTTAAAGGGGAGCGTAGACGGCGCAGCAAGTCTGATGTGAAAGGCA  
GGGGCTTAACCCCTGGACTGCATTGGAAGTCTGGTCTTAGTGTAGGAGAGGAGGCGGAAATCCGTGTGTAGCGGTG  
AAATGCGTAGATATACGGAGGAACACCAGTGGCGAAGGCGGCTGCTGGACATTAAGTACGCTGAGGCGCGAAAGCGTG  
GGGAG

>ASV:6253:Family:Prevotellaceae

TACGGAAGGTCGGGCGTTATCCGGATTTATTGGGTTAAAGGGGAGCGTAGGCGGTGCGGCAAGTCTGATGTGAAAGCCC  
GGGGCTCAACCCGGTACTGCATTGGAAGTCTGCTACTAGAGTGTCCGAGGGGTAGGCGGAAATTCGTGGTGTAGCGGTG  
AAATGCTTAGATATCACGAAGAACTCCGATTGCGAAGGCAGCTTACTGGACTGTAAGTACGCTGATGCTCGAAAGTGTG  
GGTAG

>ASV:6254:Genus:Coprococcus\_2

TACGTATGGTGCAAGCGTTATCCGGATTTACTGGGTGTAAGGGTGCCTAGGTTGGTGGAGACAAGTCTGAAGTAAAATCC  
GGGGCTTAACCCGGAACTGCTTTGGAAGTCCCTGACTAGAGTACAGGAGAGGTAAGTGAATTCCTCGTGTAGCGGTG  
AAATGCGTAGAGATGGGGAGGAACACCAGTGGCGAAGGCGGCTCCTGGGACATAACTGACGCTCAGGCACGAAAGCGTG  
GGGAG

>ASV:6255:Order:Clostridiales

TACGTATGGGGCAAGCGTTATCCGGATTTACTGGGTGTAAGGGTGCCTAGGTTGGCAGTGCAAGTCAAGTGTGAAAGGCC  
GGGGCTCAACCCGGAGCTGCATTGAAAGTGTATTTCTTAGTGTCCGAGAGGTTGACGGAATTCCTAGTGTAGCGGTG  
AAATGCGTAGATATTAGGAGGAACACCAGTGGCGAAGGCGGATTGCTGGACGACAAGTACGCTGAGGCGCGAAAGCGTG  
GGGAG

>ASV:6256:Family:Ruminococcaceae

TACGTAGGTCCCGAGCGTTATCCGGATTTACTGGGTGTAAGGGGCGTGTAGGCGGGATTGCAAGTCAAGCGTAAAACCA  
GGGGCTCAACCTCTGGCCTGCTTTGAAAGTGTAGTTCTTAGTACTGGAGAGGTTGACGGAATTCCTAGTGTAGCGGTG  
AAATGCGTAGATATTAGGAGGAACACCAGTGGCGAAGGCGGCTCCTGGTCTGTAAGTACGCTGAGGCTCGAAAGCGTG  
GGGAG

>ASV:6257:Genus:Fusobacterium

TACGTATGTCACAAGCGTTATCCGGATTTATTGGGCTAAAGTGCAGTACTAGGTTATATAAGTCTGATGTGAAAATGC  
AGGGCTCAACTCTGTATCGCGTTGAAAGTGTGTAAGTACTGAGAGGTAAGTGAAGTACAAGTGTAGAGGTGA  
AATTCGTAGATATTTGTAGGAATGCCGATGGGGAAGCCAGCTTACTGGACAGATACTGACGCTGAAGCGCGAAAGCGTG  
GTAGC

>ASV:6258:Order:Betaproteobacteriales

TACGTAGGTGGCAAGCGTTGTCCGGATTTACTGGGTGTAAGGGGCGTGTAGCCGGGAAGGCAAGTCGGATGTGAAATCCC  
CGGGCTTAACCTGGGAACTGCATTTGACTGTCGACTGGAGTACGTGAGAGGGGGTGAATTCACGTTGTAGCAGTGT  
AAATGCGTAGATATGTGGAAGAACCAGTGGCGAAGGCGGCTTACCAGACTGTAAGTACGCTGATGCACGAGAGCGTG  
GGTAG

>ASV:6259:Order:Clostridiales

TACGTAGGGGGCAAGCGCTATCCGGAATTACTGGGTGTAAGGGGAGCGTAGGCGGGCAGGCAAGTCAAGCGTAAAATCCC  
AGGGCTCAACCTGGAACTGCTTTGAAAGTCTGGTCTTAGTACCAGGAGGTCATCGGAAATTCCTAGTGTAGCGGTG  
AAATGCGTAGATATTAGGAGGAACACCAGTGGCGAAGGCGGCTTGGTGGACGACAAGTACGCTGAGGCGCGAAAGCGTG  
GGGAG

>ASV:6260:Family:Lachnospiraceae

AACGTAGGGTCAAGCGTTGTCCGGATTTACTGGGTGTAAGGGGAGCGAGGCGGAAGGCTAAGTCTGATGTGAAAGCCC

GGGGCTCAACCCGGTACTGCATTGAAACTGGTCATCTAGAGTGTCGGAGGGTAAGTGAATTCCTGGTGTAGCGGTG  
AAATGCTCAGATATCATGAAGAACTCCGATGGCGAAGGCGGCTTCTGGACAGTAACGACGTTCCAGGCTCGAAAGCGTG  
GGGAG  
>ASV:6261:Order:Clostridiales  
TACGTAGGGGCTAGCGTTATCCGGAATTACTGGGCGTAAAGGGTGCCTAGGTGGTTTCTTAAGTCAGAGGTGAAAGGCT  
ACGGCTCAACCGTAGTAAGCCTTTGATACTGGCGACCTTGAGTGCAACAGAGGTAGGCGGAATTCCTGGTGTAGCGGTGG  
AATGCGTAGATATCGGGAGGAACACCAAGTGGCGAAGGCGGCTACTGGGCACCAACTGACGCTGAGGCTCGAAAGTGTGG  
GTAGC  
>ASV:6262:Family:Succinivibrionaceae  
TACGGAAGGTCCGGGCTTATCCGGATTTATTGGGTTAAAGGGAGCGTAGGCCGGAGATTAAGCGTGTGTGAAATGTA  
GACGCTCAACGCTCTGACTGCAGCGCAACTGGGAACAGCATACTAACTGGTGGACTAGAGTATTGACGGGGGAGACGG  
AATCCAGGTGTAGCGGTGGAATGCGTAGATATCTGGAAGAACACCAAGGCGAAGGCAGTCTCCTGGGTAAATACTGAC  
GCTCA  
>ASV:6263:Genus:Negativibacillus  
TACGTAGGTGGCAAGCGTTGTCCGGAATTACTGGGTGTAAGGGAGCGTAGGCCGGGAGACAAGTTGAATGTCTAAACTA  
TCGGCTTAACTGATAGTCGCGTTCAAACCTATCACTCTTGAGTGCACTAGAGGTAGGCGGAATTCCTAGTGTAGCGGTGA  
AATGCTTAGATATCACGAAGAACTCCGATTGCGAAGGCAGCTCACTGGAGTGTAACTGACGCTGATGCTCGAAAGTGTGG  
GTATC  
>ASV:6264:Order:Clostridiales  
TACGTAGGTGGCAAGCGTTATCCGGAATTACTGGGCGTAAAGGGTGCCTAGGCCGGCGAGTTAGTCAGAAGTGAATATC  
GGGGCTTAAACCCGGGGCTGCTTCTGATACTGCTGTCTCGAGTGCAGGAGAGGTAAGTGAATTCCTAGTGTAGCGGTG  
AAATGCGTAGATATTAGGAGGAACACCAAGTGGCGAAGGCGGCTTCTGGACGATGACTGACGTTGAGGCTCGAAAGCGTG  
GGGAG  
>ASV:6265:Genus:Ruminococcaceae\_UCG-014  
TACGTAGGTGGCAAGCGTTGTCCGGAATTACTGGGTGTAAGGGTGCCTAGACGGGAATTTAAGTTAGTTGTGAAAGCCC  
TCGGCTTAACTGAGGAACTGCAACTAAAACCTGGATTTCTTGAGTGTGGAGAGGAAAGCGGAATTCCTAGTGTAGCGGTG  
AAATGCGTAGATATTAGGAGGAACACCAAGTGGCGAAGGCAGTCTCTGGGCCGTTACTGACGCTGAGGAGCGAAAGCGTG  
GGGAG  
>ASV:6266:Genus:Oscillospira  
TACGTAGGGGGCAAGCGTTGTCCGGATTTACTGGGTGTAAGGGCGTGTAGCCGGGTGTGTAAGTCAGATGTGAAATCTG  
GAGGCTCAACCTCAAACCTGCAATTTGAAACTGCGCATCTTGAGTATCGGAGAGGTATCGGAATTCCTAGTGTAGCGGTG  
AAATGCTTAGATATGACGAAGAACTCCGATTGCGAAGGCAGCTGCTGTAGCGTAACTGACGCTGAAGCTCGAAAGCGTG  
GGTAT  
>ASV:6267:Genus:Holdemanelia  
TACGTATGGTGAAGCGTTATCCGGATTTACTGGGTGTAAGGGTGCCTAGGTGGTATGGCAAGTCAGAAGTAAAAGGTA  
TGGGCTCAACCCGACTGGCTCTGGAACCTGATCAGCTAGAGAACAGAAGAGGACGGCGGAACCTCATGTGTAGCGGTAA  
AATGCGTAGATATATGGAAGAACACCCGGTGGCGAAGGCGACTTTCTGGACGAAAACCTGACGCTGAGGCGCGAAAGCGTG  
GGAGC  
>ASV:6268:Family:Lachnospiraceae  
TACGTAGGGGGCAAGCGTTATCCGGATTTACTGGGTGTAAGGGAGCGTAGACGGCAAGGCAAGTCTGAAGTAAAAGCCC  
GGTGCTTAAACCGGGACTGCTTTGGAACCTGTTAGCTGGAGTGTGGAGAGGAAAGTGAATTCCTAGTGTAGCGGTG  
AAATGCGTAGATATTAGGAGGAACACCGATTGCGAAGGCAGCTCACTGGAGCGCAACTGACGCTGAAGCTCGAAAGTGGC  
GGTAT  
>ASV:6269:Genus:Ruminococcaceae\_UCG-013  
TACGTAGGTGGCGAGCGTTGTCCGGAATTACTGGGTGTAAGGGCGAGTAGGCCGACATACAAGTCAGAAGTAAAATCTA  
GGGGCTCAACCCCTAAACTGCTTTTGAACCTGATGCCTTGAGTGCCGGAGAGGAAAGCGGAATTCCTAGTGTAGCGGTG  
AAATGCGTAGATATTAGGAAGAACACCCGGTGGCGAAGGCGACTTTCTGGACGAAAACCTGACGCTGAGGCGCGAAAGCGTG  
GGGAG  
>ASV:6270:Family:Lachnospiraceae  
TACGTAGGTGGCAAGCGTTGTCCGGATTTACTGGGTGTAAGGGCGTGCAGCCGGGCTGGCAAGTCAGGCGTGAAATCCC  
CGGGCTCAACCCGGAACTGCTTTGGAACCTGTTGGCTAGAGTGTGGAGAGGCAAGCGGAATTCCTAGTGTAGCGGTG  
AAATGCGTAGATATTAGGAGGAACACCAAGTGGCGAAGGCGGCTTACTGGACTGTAACCTGACACTGAGGCACGAAAGCGTG  
GGGAG  
>ASV:6271:Genus:Rothia  
TACGTAGGGCGCGAGCGTTGTCCGGAATTATTGGGCGTAAAGAGCCTGTAGGCGGTTGGTCGCGTCTGCTGTGAAAGGCT  
GGGGCTTAAACCTGGTTTTGCAGTGGGTACGGGCTAACTAGAGTGCAGTAGGGGAGACTGGAATTCCTGGTGTAGCGGTG  
GAATGCGCAGATATCAGGAGGAACACCCGATTGGCGAAGGCGAGTCTCTGGGCTGTAACCTGACGCTGAGAAGCGAAAGCGTG  
GGGAG  
>ASV:6272:Genus:Flavonifractor  
TACGGAGGATCCGAGCGTTATCCGGATTTATTGGGTTAAAGGGAGCGTAGGCCGGGATTGCAAGTCAGATGTGAAAACCTG  
GGGGCTCAACCTCCAGCCTGCAATTTGAACTGTAGTCTTGAGTGTGGAGAGGCAATCGGAATTCCTGTGTAGCGGTG  
AAATGCGTAGATATATGGAAGAACACCAAGTGGCGAAGGCGGCGGCTTGGGGTGCAGCTGACGCTCAGTCCCGAAAGCGTG  
GGGAG  
>ASV:6273:Order:Bacteroidales  
TACGGAGGGTGAAGCGTTAATCCGGAATTACTGGGCGTAAAGCGCACGCGAGGCGGTTTGTAAAGTCAGATGTGAAAAGTTT  
GCGGCTCAACCGTAAATTTGCAATTGATACTGGCAGTCTTGAGTACAGTTGAGGTAGGCGGAATTCCTGGTGTAGCGGTG  
AAATGCTTAGATATCACGAAGAACTCCGATTGCGAGGCGAGCTTAACTGTAACCTGACATTGATGCTCGAAAGTGTG  
GGTAT

>ASV:6274:Genus:Lachnospiraceae\_ND3007\_group  
TACGGAGGATTCAAGCGTTATCCGGATTTACTGGGTGTAAGGGGAGCGTAGGTGGCAAGGCAAGCCAGAAGTGAAAACCC  
GGGGCTCAACC CGGGATTGCTTTTGGAACTGTCATGCTAGAGTGCAGGAGGGGTGAGCGGAATTCACAGTGTAGCGGTG  
GAATGTGTAGATATCGGGAAGAACCACCAATGGCGAAGGCAGGTCTCTGGGCCGTTACTGACGCTGAGGAGCGAAAGCGTG  
GGGAG

>ASV:6275:Order:Gastraerophilales  
TACGGGGGGTGAAGCGTTGTCCGGAATCATTGGGCGTAAAGAGTTCGTAGGCGGCATGTCAAGTCTGGTGTTTAATCCT  
GAGGCTCAACCTCAGTTCAGACTGGATACTGGCAAGCTAGAATGCGGTAGAGGTAAGGGAATTCCTGGTGTAGCGGTG  
AAATGCGTAGATATTAGGAGGAACACCAGTGGCGAAGGCGGCTTACTGGACGATAACTGACGCTGAGGCTCGAAAGCGTG  
GGGAG

>ASV:6276:Kingdom:Bacteria  
TACGTAGGTGGCAAGCGTTGTCCGGATTTACTGGGTGTAAGGGGCGTGCAGCCGGGAATGCAAGTCAAGTGTGAAATCCA  
TGGGCTCAACCTGGGAAGTGCATCTGATACTGGCAAGCTTGTAGTCTCTGAGAGGGGGTGAATTCAGGTGTAGCGGTG  
AAATGCTTAGATATCACGAAGAATCCGATTGCGAAGGCAGCTTACTGGACTGTAAGTACGCTGAGGCTCGAAAGTGTG  
GGTAT

>ASV:6277:Class:Bacilli  
TACGGAGGATCCGAGCGTTATCCGGATTTATTGGGTTTAAAGGGAGCGTAGGCGGGTGTCTAAGTCTGATGTGAAAGCCC  
CCGGCTCAACCCGGAGTGTGCCGTTGAACTGGGAACTTGTAGTGCAGAAAGGAGAGTGAATTCATGTGTAGCGGTG  
AAATGCGTAGATATATGAGGAACACCAGTGGCGAAGGCAGCATCTGGCGCATAACTGACGCTCAGTCCCAGAAAGCGTG  
GGGAG

>ASV:6278:Family:Lachnospiraceae  
TACGTAGGGGGCAAGCGTATCCGGATTTACTGGGTGTAAGGGGAGCGTAGGTGGCAAGGCAAGCCAGAAGTGAAAACCC  
GGGGCTCAACCCGGAGTGTGCCGTTGAACTGTCATGCTAGAGTGCAGGAGGGGTGAGCGGAATTCACAGTGTAGCGGTG  
GAATGCGTAGATATCGGGAAGAACCACAGTGGCGAAGGCAGCATCTGGCGCATAACTGACGCTCAGTCCCAGAAAGCGTG  
GGGAG

>ASV:6279:Genus:Barnesiella  
TACGGAGGATTCAAGCGTTATCCGGATTTATTGGGTTTAAAGGGTGCAGTGGCGGTTTGATAAGTTAGAGGTGAAATTTCC  
CGGGCTCAACCCGGAGTGTGCCGTTGAACTGGCGAGCTAGAGTACACAAGAGGCAGGCGGAATGCGTGGTGTAAAGCGTG  
AAATGCTTAGATATCACGAAGAATCCGATTGCGAAGGCAGCTACTGGAGTGAAGTACGCTGATGCTCGAAAGTGTG  
GGTAT

>ASV:6280:Family:Ruminococcaceae  
TACGTAAAGGGGCAAGCGTTATCCGGATTTACTGGGTGTAAGGGGAGCGTAGACGGTGTGGCAAGTCTGATGTGAAAGGCA  
TGGGCTCAACCTGTGGACTGCATTGGAAGTCTTCTGCTTGTAGTGAAGTAGAGGTAGGCGGAATTCACAGTGTAGCGGTG  
AAATGCGTAGAGATCGGGAAGAACCACAGTGGCGAAGGCGGCTTACTGGGCTTAACTGACGCTGAAGCACGAAAGCATG  
GGTAG

>ASV:6281:Genus:Peptoniphilus  
TACGTAGGGGGCTAGCGTTGTCCGGAATCACTGGGCGTAAAGGGTTCGAGGCGGAAATGCAAGTCAAGTGTAAAGGCA  
GTAGCTTAACTACTGTAAAGCATTGAAACTGCATATCTTGAAGAGTAGAGGTAAGTGAATTTTTAGTGTAGCAGTGA  
AATGCGTAGATATTAAGAAGAATACCGGTGGCGAAGGCGACTTACTGGGCTCATTCTGACGCTGAGGAACGAAAGCGTG  
GTAGC

>ASV:6282:Genus:Alistipes  
TACGTAGGTGGCAAGCGTTGTCCGGATTTACTGGGTGTAAGGGGCGTGCAGCCGGGCTGGCAAGTCAAGCGTGAATCC  
GGGGCTTAACTCCGGAAGTGCCTCTAATACTGTTAGACTAGAGAGTGTGCGGTAGGCGGAATGTATGGTGTAGCGGTG  
AAATGCTTAGAGATCATAAGAACACCAGTGGCGAAGGCAGCTTACCAAATATATCTGACGTTGAGGCACGAAAGCGTG  
GGGAG

>ASV:6283:Species:aquaticum/platani  
TACGAAGGGGGCTAGCGTTGTCCGGAATCACTGGGCGTAAAGGGGCGTAGGCGGCTGATTTAGTCAAGGGTGAAGGCC  
GTGGCTCAACCACGGAATGGCCTTCGATACTGATTGGCTCGAGACCGGAAGAGGACAGCGGAAGTGCAGTGTAGAGGTG  
AAATTCGTAGATATTCGAAGAACCACAGTGGCGAAGGCGGCTGTCTGGTCCGGTTCGACGCTGAGGCGCGAAAGCGTG  
GGGAG

>ASV:6284:Genus:Lactobacillus  
TACGTAGGTGGCAAGCGTTGTCCGGATTTATTGGGCGTAAAGCGAGCGCAGGCGGAAGAATAAGTCCGATGTGAAAGCCC  
TCGGCTTAAACCAGGAAGTGCATCGGAACTGTTTTCTTGTAGTGCAGAAAGAGGAGTGAAGTCCATGTGTAGCGGTG  
GAATGCGTAGATATATGGAAGAACCACAGTGGCGAAGGCGGCTCTCAGTCTGCAACTGACGCTGAGGCTCGAAAGCATG  
GGTAG

>ASV:6285:Family:Christensenellaceae  
TACGTAGGGAGCGAGCGTTGTCCGGAATTAAGGGTTCGTAAGGGTGCAGTGGCGGTTTGGTAAGTCAAGTGTGAAATACC  
CGGGCTTAAACCAGGGGCTGCATCTGATACTGTCAGACTTGTAGTGCAGGAGAGGAAAGCGGAATTCCTAGTGTAGCGGTG  
AAATGCGTAGATATTAGGAGGAACACCAGTGGCGAAGGCGGCTTCTGGACTGTAAGTACGCTGAGGCGCGAAAGCGTG  
GGGAG

>ASV:6286:Genus:Bacteroides  
TACGGAGGATCCGAGCGTTATCCGGATTTATTGGGTTTAAAGGGTGCAGTGGCGGCTTTTAAAGTCAAGCGGTGAAAGCCC  
GGGGCCCAACCCGGAAGTGCATTGGAAGTGTGGGCTTGTAGTGCAGGAGAGGTAAGCGGAATTCGTGGTGTAGCGGTG  
AAATGCTTAGATATCACGAAGAATCCGATTGCGAAGGCAGCTGCTAAGTGCAGTACGCTGAGGCTCGAAAGTGTG  
GGTAT

>ASV:6287:Order:Clostridiales  
AACGTAGGGTGAAGCGTTGTCCGGAATTAAGGGTTCGTAAGGGTGCAGTGGCGGAGCAGCAAGTCTGATGTGAAAGGCG  
GGGGCTCAACCCCGGACTGCATTGGAGACTGTTGATCTTGTAGTACCGGAGAGGTAAGCGGAATTCCTAGTGTAGCGGTG





TACGTAGGATGCAAGCGTTATCCGGATTTACTGGGTGTAAAGGGAGCGTAGACGGACTGGCAAGTCTGATGTGAAAGGCG  
GGGGCTCAACCCCTGGACTGCATTGAAACCGTAGAGCTAGAGTGTGTGAGAGGATCGTGGAATTCATGTGTAGCGGTG  
AAATGCGTAGATATATGGAGGAACACCAGTGGCGAAGGCGACGATCTGGCGCATAACTGACGCTCAGTCCGAAAGCGTG  
GGGAG  
>ASV:6302:Family:Ruminococcaceae  
TACGTAGGGGGCAAGCGTTATCCGGATTTACTGGGTGTAAAGGGCGTGCAGCCGGGCGGCAAGTCAGATGTGAAATCTG  
GAGGCTTAACCTCCAACTGCATTTGAAACTGATTTCTTGGAGTGTGCAGAGGTAGGCGGAATTCGCGGTGTAGCGGTG  
GAATGCGTAGATATCGGGAGGAACACCAGTGGCGAAGGCGGCTACTGGGCACCAACTGACGCTGAGGCTCGAAAGTGTG  
GGTAG  
>ASV:6303:Genus:Pseudoflavonifractor  
TACGTAGGGGGCAAGCGTTATCCGGATTTACTGGGTGTAAAGGGAGCGCAGGCGGCATGATAAGTCTGATGTGAAAACCC  
AAGGCTCAACCATGGGACTGCATTTGAAACTGTAGTTCTCGAGTGTGGAGAGGCAATCGGAATTCGCGGTGTAGCGGTG  
AAATGCGTAGATATACGGAGGAACACCAGTGGCGAAGGCGGATTGCTGGACAGTAACGACGCTGAGGCGCGAAAGCGTG  
GGGAG  
>ASV:6304:Family:Family\_XIII  
TACGGAGGATTCAAGCGTTATCCGGATTTACTGGGTGTAAAGGGCGCGTAGGTGGTTACCTAAGCGCAGGGTATAAGGCA  
ATGGCTCAACCATTTGTCGCTGCGAACTGGGCTACTTGGAGTGCAGGAGAGGAAAGCGGAATTCCTAGTGTAGCGGTG  
AAATGCGTAGATATTAGGAGGAACACCAGTGGCGAAGGCGGCTTCTGGACTGAACTGACGCTGAGGCTCGAAAGCGTGG  
GGAGC  
>ASV:6305:Genus:Oscillibacter  
TACGGAGGATCCGAGCGTTATCCGGATTTATTGGGTTAAAGGGAGCGTAGGCGGCATGGTAAGCCAGATGTGAAGTCTG  
GAGGCTTAACCTCCAACTGCATTTGAAACTGTAGGTCTTGGAGTACCGGAGAGGTTATCGGAATTCCTTGTGTAGCGGTG  
AAATGCGTAGATATAAGGAAGAACACCAGTGGCGAAGGCGGATAACTGGACGCAACTGACGCTGAGGCGCGAAAGCGTG  
GGGAG  
>ASV:6306:Genus:Megamonas  
TACGTAGGATGCAAGCGTTATCCGGATTTACTGGGTGTAAAGGGAGCGCAGGCGGGAACTAAGCGGATCTTAAAAGTGC  
GGGGCTCAACCCGATGGGGTCCGAACTGGTTTTCTTGGAGTGCAGGAGAGGAAAGCGGAATTCAGTGTAGCGGTG  
AAATGCGTAGATATCGGGAGGAACACTCGTGGCGAAGGCGGTTCTTGACATTAACGCTGAGGACGAAAGGCCAGG  
GGAGC  
>ASV:6307:Class:Bacteroidia  
TACGGAGGATGCAAGCGTTATCCGGATTTATTGGGTTAAAGGGTGCCTAGGCGGCACGGCAAGTTTGTGTGAAACCCA  
TAGGCTCAACCTGTGGCATGCATCAAAAACCTACCGAGCTAGAGTGCAGGAGAGGAAAGCGGAATTCCTAGTGTAGCGGTG  
AAATGCTTAGAGATACATACAGAACACCAGTTCGGAAGGCGAGCTTACCAAACATATATCTGACGTTGAGGCACGAAAGCGTG  
GGGAG  
>ASV:6308:Family:Ruminococcaceae  
TACGGAGGGTCAAGCGTTAATCGGAATTTACTGGGTGTAAAGGGAGCGCAGGCGGGATAGCAAGTCAGCTGTGAAAACCTA  
TGGGCTCAACCCATAAAGTAACTGCTTTCAAACCTGTTTTCTTGGAGTGCAGAGGTAGGCGGAATTCGCGGTGTAGCGGTG  
GAATGCGTAGATATCGGGAGGAACACCAGTGGCGAAGGCGGCTTACTGGACGTAACGACGTTGAGGCTCGAAAGTGTG  
GGTAT  
>ASV:6309:Family:Erysipelotrichaceae  
TACGTAGGTCCCGAGCGTTGTCTGGATTTATTGGGCGTAAAGCGAGCGCAGGCGGTTAATAAGTCTGAAGTTAAAGGCA  
TTGGCTCAACCAATGTAAGCTATGGAACCTGGTCGGCTGGAGTGCAGAAAGAGGCGATGGAATTCATGTGTAGCGGTAA  
AATGCGTAGATATATGGAGGAACACCAGTGGCGAAGGCGGCTCGCCTGGTCTGCAACTGACACTGAGGCACGAAAGCGTGG  
GGAGC  
>ASV:6310:Genus:Asaccharospora  
TACGTAGGGGGCTAGCGTTATCCGGATTTACTGGGCGTAAAGGGTGCCTAGGCGGCTTTTTAAGTCAGGAGTGAAGGCT  
ACGGCTCAACCGTAGTAAAGCTTTGAAACTGGAGACTTGGAGTGCAGGAGAGGTAAGCGGAATTCGCGGTGTAGCGGTGA  
AATGCTTAGATATCACGAAGAACTCCGATTGCGAAGGCGACTTACTGGATTGTAACGACGCTGATGCTCGAAAGTGTGG  
GTATC  
>ASV:6311:Phylum:Firmicutes  
TACGTAGGATGCGAGCGTTATCCGGATTTATTGGGCGTAAAGGGCGCGCAGGTGGTTTTCTAAGTCTGTCTTAAAAGTGC  
GGGGCTTAACCCGAGGGGACGAAACTGGGAGACTAGAGTATCGGAGAGGAAAGTGAATTCGCGGTGTAGCGGTGG  
AATGCGTAGATATCGGGAGGAACACCAGTGGCGAAGGCGACCTACTGGGCACCAACTGACGCTGAGGCTCGAAAGCATGG  
GTAGC  
>ASV:6312:Genus:Bacteroides  
TACGTAGGGGGCAAGCGTTGTCCGGAATAATTGGGCGTAAAGGGCGCGTAGGCGGACGCTTAAAGTCAGTTGTGAAAGTTT  
GCGGCTCAACCGTAAATGAGCTTGTGATACTGGGTGCTTGGAGTACAGTAGAGGTGGGCGGAATTCGCGGTGTAGCGGTG  
AAATGCTTAGATATCACGAAGAACTCCGATTGCGAAGGCGACTACTAGACTGCTGACACTGATGCTCGAAAGTGTG  
GGTAT  
>ASV:6313:Phylum:Firmicutes  
TACGTAGGTGGCAAGCGTTGTCCGGATTTACTGGGTGTAAAGGGCGTGCAGCCGGTCTGCAAGTCAGATGTGAAATCCC  
TCGGCTTAACTGAGGAACTGCAACTAAAACCTGATTTCTTGGAGTACTGGAGAGGAAAGTGAATTCCTAGTGTAGCGGTG  
AAATGCGTAGATATTGGGAGGAACACCAGTGGCGAAGGCGCCTTCTGGACTGTGCTGACGCTGAGATGCGAAAGCCAG  
GGTAG  
>ASV:6314:Family:Ruminococcaceae  
TACGTAGGGAGCGAGCGTTGTCCGGAATTTACTGGGTGTAAAGGGAGCGTAGGTGGATTGTAAGTCAAGTGTGAAAGTTT  
GCGGCTCAACCGTAAATGAGTTGAAACTGGCAGTCTTGGAGTACAGTAGAGGTGGGCGGAATTCGCGGTGTAGCGGTG  
AAATGCGTAGATATACGGAGGAACACCAGTGGCGAAGGCGGATTGCTGGACAGTAACGACGCTGAGGCGCGAAAGCGTG

GGGAG  
>ASV:6315:Order:Clostridiales  
TACGTAGGGGCGAGCGTTGTCCGGAATTACTGGGCGTAAAGGGAGCGTAGGCGGTCTGATAAGTTGGATGTGAAATACC  
CGGGCTTAACCTGGGGTCTGCATCCAATACTGGGAGATTAGAGTGCAGGAGAGGGAAGCGGAATTCCTAGTGTAGCGGTG  
AAATGCATAGATATCACGCAGAACCCCGATTGCGAAGGCAGCTGCTAGGGTAAACAGACGCTGAGGCACGAAAGCGTG  
GGTAT  
>ASV:6316:Family:Lachnospiraceae  
TACGTAGGGGCAAGCGTTATCCGGATTTACTGGGTGTAAGGGAGCGTAGACGGTTTTGCAAGTCTGAAGTAAAAGCCC  
GGGGCTTAACCTCGGAAGTACTGCCAAAAGTGGTGAAGTGTGTAGGGGTAAGTGAATTCCTAGTGTAGCGGTG  
GAATGCGTAGATATTAGGAGGAACACCGGAGGCGAAAGCGACTTACTGGGGCACAACGACGCTGAGGCACGAAAGCGTG  
GGGAG  
>ASV:6317:Family:Clostridiales\_vadinBB60\_group  
TACGTAGGGAGCGAGCGTTATCCGGATTTACTGGGCGTAAAGGGAGCGTAGGCGGGCAACAAGTTAGGAGTAAAATCCC  
GGGGCTTAACCCGGAAGTGTCTTTAAAAGTGTGAGCTAGAGTGTGGAGAGGAAAGCGGAATTCCTAGTGTAGCGGTG  
GAATGCGTAGATATTAGAAGGAACACCGAGTGGCGAAAGCGATTACTAGGCCAAAAGTACGCTGAGGCACGAAAGCATG  
GGTAG  
>ASV:6318:Genus:Ruminococcaceae\_UCG-008  
TACGTAGGGAGCGAGCGTTGTCCGGAATTACTGGGTGTAAGGGGAGCGTAGGCGGGTGGTAAGTTGGAAGTAAAATCTA  
GGGGCTTAACCCCTAAAGTGTCTTTAAAAGTGTGAGTGTGGAGAGGTAGGCGGAATTCCTAGTGTAGCGGTG  
AAATGCGTAGATATTGGGAGGAACACCGAGTGGCGAAAGCGCTTACTGGGCTCTAAGTACGCTGAGGCACGAAAGCATG  
GGTAG  
>ASV:6319:Order:Clostridiales  
TACGTAGGGAGCAAGCGTTATCCGGATTTACTGGGTGTAAGGGTGCCTAGGCGGAAATTAAGTTAGTTGTGAAATCCC  
CGGGCTTAACCTGGGGTCTGCATCCAATACTGGGAGACTAGAGTGCAGGAGAGGGAAGCGGAATTCCTAGTGTAGCGGTG  
AAATGCGTAGATATTAGGAGGAACACCGAGTGGCGAAGCGGCTTACTGGACGATGACGCTTGGGCTCGAAAGCGTG  
GGGAG  
>ASV:6320:Family:Lachnospiraceae  
TACGTATGGAGCAAGCGTTATCCGGATTTACTGGGTGTAAGGGTGCCTAGGTGGCAGTGCAAGTCAAGTGTGAAAGGCC  
GGGGCTCAACCCGAGCTGCATTTGAAAGTGTGAGTCTTGGAGTGGAGAGGTAATGGAATTCCTGGTGTAGCGGTG  
AAATGCGTAGATATTAGGAGGAACATCAGTGGCGAAGCGGCTTCTGGACTGTAAGTACGCTTGGGCACGAAAGTGTG  
GGGAG  
>ASV:6321:Genus:DTU089  
TACGTAGGGAGCGAGCGTTGTCCGGAATTACTGGGTGTAAGGGTGCCTAGGCGGATCTGCAAGTCAAGTGTGAAATCCC  
AGGGCTTAACCTGGAAGTGTATTGAAAGTGTGGGTCTTGGAGTGGAGGAGGCGGGAATTCCTGGTGTAGCGGTG  
AAATGCTTAGATATCACGAAGAACTCCGATTGCGAAGGCAGCTGCTAAGCTGCAACTGACATTGAGGCTCGAAAGTGTG  
GGTAT  
>ASV:6322:Order:Lactobacillales  
TACGGAGGATCCGAGCGTTATCCGGATTTACTGGGTTAAAGCGAGCGCAGCGGTTATTTAAGTCTGAAGTAAAAGCCC  
TCAGCTCAACTGAGGAATTGCTTTGAAAGTGTCAAAGTGTGAGTGCAGAAAGGGAGAGTGAATTCATGTGTAGCGGTG  
AAATGCGTAGATATTAGGAGGAACACCGGTGGCGAAAGCGGCTCCCTGGTCTGTAAGTACGCTTGGGCTCGAAAGCGTG  
GGTAT  
>ASV:6323:Kingdom:Bacteria  
TACGGAGGATCCGAGCGTTATCCGGATTTACTGGGTTAAAGGGAGCGTAGGCGGGTTGTTAAGTCAAGTGTGAAAGCCA  
GTGGCTCAACCACTGGCCTGCATTTGAAAGTGTCTTTCTTGGAGTGTGGAGAGGCGGGAATTCCTGTGTAGCGGTG  
AAATGCGTAGATATACGGAGGAACACCGAGTGGCGAAGGCAGCTTACTGGACGTTAAGTACGCTTGGGCTCGAAAGCGTG  
GGGAG  
>ASV:6324:Order:Selenomonadales  
TACGTAGGGAGCGAGCGTTGTCCGGAATTACTGGGCGTAAAGGGTGCCTAGGCGGTTTTGTAAGTCAAGTGTGAAATACC  
CGGGCTTAACCCGGGGGCTGCATCTGATACTGTGAGCTTGGAGGAGGAAAGGGGAATTCCTAGTGTAGCGGTG  
AAATGCGTAGATATTGGGAGGAACACCGAGTGGCGAAGGCAGCTTCTGGACTGTGCTGACGCTGAGATGCGAAAGCCAG  
GGTAG  
>ASV:6325:Family:Erysipelotrichaceae  
TACGTAGGTGGCAAGCGTTATCCGGAATCATTGGGCGTAAAGGGTGCCTAGGTGGCAGGATAAGTCTGAAGTAAAAGGCCA  
ACAGCTCAACTGTTGTATGCTTTGAAAGTGTGCTGCTAGAGTGTGCGGAGAGGTAAGCGGAATTCCTAGTGTAGCGGTGA  
AATGCGTAGATATTAGGAGGAACACCGAGTGGCGAAGGCAGCTTACTGGACGTTAAGTACGCTTGGGCTCGAAAGCGTG  
GGAGC  
>ASV:6326:Order:Clostridiales  
TACGTAGGTGGCAAGCGTTGTCCGATTTACTGGGTGTAAGGGGCGTGCAGCCGGCCGCAAGTCAAGTGTGAAATCTG  
GAGGCTTAACCTCAAAGTGTCTTTGAAAGTGTAGGGCTAGAGTGCAGGAGGGGCAAGTGAATTCCTAGTGTAGCGGTG  
AAATGCGTAGATATTAGGAGGAACACCGAGTGGCGAAGGCAGCTTCTGGACTGCAACTGACATTGAGGCTCGAAAGTGTG  
GGTAT  
>ASV:6327:Family:Lachnospiraceae  
AACGTAGGTCAAGCGTTGTCCGGAATTACTGGGTGTAAGGGGAGCGAGGCGGTTGAGTAAGACAGAAGTAAAAGCCC  
GGGGCTCAACCCGGGACTGCTTTTAAAAGTGTGAGGCTAGAGTGCAGGAGGGGCAAGTGAATTCCTAGTGTAGCGGTG  
AAATGCGTAGATATTAGGAGGAACACCGAGTGGCGAAGGCAGCTTCTGGACGACAACGACGCTGAGGCAGGAAAGCCAG  
GGGAG  
>ASV:6328:Class:Bacteroidia  
TACGGAGGATCAAGCGTTATCCGGAATTACTGGGTGTAAGGGTGCCTAGGCGGGATGTAAGTCAAGTGTGAAATGCC

GCGGCTCAACCGGGAGCTGCATTTGAACTTATGTTCTTGTAGTGAAGTAGAGGTAAGCGGAATTCCTAGTGTAGCGGTG  
AAATGCATAGATATAACTTAGAACTCCGATAGCGAAGGCAGCTTACCAGACTGTAACGTACGCTGATGCACGAGAGCGTG  
GGTAG  
>ASV:6329:Order:Clostridiales  
TACGTAGGTGGCGAGCGTTGTCCGGAATTACTGGGTGTAAGGGAGCGTAGACGGCACGGCAAGCCAGATGTGAAAGCCC  
GGGGCTCAACCCGGGACTGCTTTGAAACTGTTAACTAGAGTGTGGAGAGGTAAGCGGAATTCAGGTGTAGGAGTG  
AAATCCGTAGATATCTGGAGGAACACCGGTGGCGAAGGCGGCCACCTGGACGGTAACGTACGCTGAGGTGCGAAAGCGTG  
GGTAG  
>ASV:6330:Order:Clostridiales  
TACGGAGGATTCAAGCGTTATCCGGAATTACTGGGTGTAAGGGTGTGTAGGCGGGTGTCAAGTCAGATGTGAAAACCTG  
TGGGCTCAACCCACAACACTGCATTTGAAACTGATACTCTTGTAGAGTGGGAGAGGTAACCGGAATTCCTGGTGTAGTAGTG  
AAATCCGTAGATATCAGGAAGAACCTCCGATTGCGAAGGCAGCTGCTAAGCTGCAACTGACATTGAGGCTCGAAAGTGTG  
GGTAT  
>ASV:6331:Genus:Lactonifactor  
AACGTAGGTCACAAGCGTTGTCCGGAATTACTGGGTGTAAGGGAGCGCAGGCGGGAAGACAAGTCTGATGTGAAAGCCC  
GGGGCTCAACCCGGTACTGCATTGAAACTGTCGTAAGTGTGGAGGGTAAGTGGAAATTCCTAGTGTAGCGGTG  
AAATCCGTAGATATTAGGAGGAACCTCCGATTGCGAAGGCAGCTGCTAAGCTGCAACTGACATTGAGGCTCGAAAGTGTG  
GGTAT  
>ASV:6332:Order:Clostridiales  
TACGTAGGGGCGAGCGTTGTCCGGAATTACTGGGCGTAAAGGGTGCCTAGGCGGCCTGAAAAGTCCGATGTGAAAGACC  
CGTGCTTAACCTGGGGTGTGATCCGAAACTTTCGGGCTTGTAGTGCAGAAGAGGCAAGTGGAAATTCAGTGTAGCGGTG  
AAATCCGTAGATATTGGGAGGAACACAGTGGCGAAGGCAGCTTGTGGCCGCAACTGACGCTGAGGCACGAAAGCGTG  
GGGAG  
>ASV:6333:Genus:CAG-56  
TACGGAGGATCCGAGCGTTATCCGGATTTATTGGGTTAAAGGGAGCGTAGACGGCAGGCAAGTCTGATGTGAAAACCC  
GGGGCTCAACCCGTGACTGCATTGAAACTGTTTTGCTTGTAGTGCAGAGAGGTAAGCGGAATTCCTAGTGTAGCGGTG  
AAATCCGTAGATATCGAGAGGAACACTCGTGGCGAAGGCGGTTCTTGACATTAACGTACGCTGAGGCACGAAAGCCAG  
GGGAG  
>ASV:6334:Order:Clostridiales  
AACGTAGGGGCGAGCGTTGTCCGGAATTACTGGGCGTAAAGGGTGCCTAGGCGGTTTGGTAAGTTGGATGTGAAATACC  
CGGGCTTAACCTGGGGCTGCATCCAATACTGTCGGACTTGTAGAGTGTGGTAGGCGGAATGTATGGTGTAGCGGTG  
AAATCCGTAGATATCGGAGGAACACAGTGGCGAAGGCGGCTGCTGGCTTAACTGACGCTGAGGCACGAAAGCGTG  
GGTAG  
>ASV:6335:Family:Burkholderiaceae  
TACGTAGGGGCGAGCGTTATCCGGATTCATTGGGCGTAAAGCGCGCTAGGCGATTCTGTAAGATAGATGTGAAATCCC  
CGGGCTCAACCTGGGAATTGCATATATGACTGCAGGACTTGTAGTTGTGAGAGGAGGTTGGAATTCACGCTGTAGCAGTG  
AAATCCGTAGATATGTGGAAGAACACCGATGGCGAAGGCAGCTCACTAGACTGTTACTGACACTGATGCTCGAAAGTGTG  
GGTAT  
>ASV:6336:Order:Bacteroidales  
TACGTAGGTCACAAGCGTTGTCCGGAATTACTGGGTGTAAGGGAGCGCAGGCGGGAAGACAAGTTGGAAGTAAATCTA  
TGGGCTCAACCGTAAATTTGCACTTGTACTGGATGTCTTGTAGTGCAGTTGAGGCAGGCGGAATTCGTGGTGTAGCGGTG  
AAATGCTTAGATATCAGGAAGAACCTCCGATTGCGAAGGCAGCTCACTAGACTGCAACTGACACTGATGCTCGAAAGCGTG  
GGGAG  
>ASV:6337:Family:Lachnospiraceae  
TACGGAGGATCCGAGCGTTATCCGGATTTACTGGGTGTAAGGGAGCGTAGACGGCACGGCAAGCCAGATGTGAAAGCCC  
GGGGCTCAACCCGGTACTGCATTGAAACTGTCGGACTAGAGTGTGGAGGGTAAGTGGAAATTCCTAGTGTAGCGGTG  
AAATCCGTAGATATTAGGAGGAACACAGTGGCGAAGGCGATTCTCTGACTGTAACGTACGCTGAGGCTCGAAAGTGTG  
GGTAG  
>ASV:6338:Family:Family\_XIII  
TACGTAGGGGCAAGCGTTATCCGGATTTACTGGGCGTAAAGAGTGCCTAGGTGGTAACTTAAGCGCGGGTTTAAAGGCA  
ATGGCTTAACCTGTTGCGCTGCGAAGTGGGATACTTGTAGTGCAGGAGAGGAAAGCGGAATTCCTAGTGTAGCGGTG  
AAATGCTAGATATCAGGAAGAACACCGGTGGCGTAAGCGCTTACTGGCCGTTATTGACGCTGAGGAACGAAAGCGTGG  
GGAGC  
>ASV:6339:Family:Clostridiaceae\_2  
TACGTAGGGGCTAGCATTATCCGGAATTACTGGGCGTAAAGGGTGCCTAGGTGGTTTCTTAAGTCAGAGGTGAAAGGCT  
ACGGCTCAACCGTAGTAAGCCTTTGAAACTGTTGAGTGAAGCAGAGGCGGGAATTCCTAGTGTAGCGGTG  
AAATGCTAGATATCGGAGGAACACAGTGGCGAAGGCGGCTGCTGGGCTTAACTGACGCTGAGGCACGAAAGCGTGG  
GTAGC  
>ASV:6340:Family:Lachnospiraceae  
TACGTAGGGGCGAGCGTTGTCCGGAATTACTGGGCGTAAAGGGTGCCTAGGCGGTTTGGTAAGTTGGATGTGAAAGCCC  
GGGGCTCAACCCGGTACTGCATTGAAACTGTCGTAAGTGTGGAGGGTAAGTGGAAATTCCTAGTGTAGCGGTG  
AAATGCTAGATATTAGGAGGAACACAGTGGCGAAGGCGGCTCACTGACTGTAACGTACACTGAGGCTCGAAAGTGTG  
GGTAT  
>ASV:6341:Family:Ruminococcaceae  
TACGTAGGAGCAAGCGTTATCCGATTTACTGGGTGTAAGGGCGCGCAGGCGGGCCGCAAGTTGGAAGTAAATCTA  
TGGGCTCAACCCATAAACTGCTTTCAAACCTGTTTTCTTGTAGTGCAGAGGCAGGCGGAATTCGTGGTGTAGCGGTG  
AAATGCTAGATATCAGGAAGAACCTCCGATTGCGAAGGCAGCTGCTAAGCTGCAACTGACATTGAGGCTCGAAAGTGTG  
GGTAT

>ASV:6342:Genus:Epulopiscium  
TACGTAGGGGGCAAGCGTTATCCGGAATTACTGGGTGTAAAGGGTGCCTAGGCGGCGATTTAAGTCAGATGTGAAAACCT  
AGGGCTCAACCTTGAGACTGCATCTGAAACTGAGTTGCTAGAGTGCAGGAGAGGAAAGCGGAATTCAGAGTGTAGCGGTG  
AAATGCGTAGAGATTGCGAGGAACACCAGTGGCGAAGGCGGCTTACTGGACGGTAACGACGTTGAGGCTCGAAAGCGTG  
GGGAG

>ASV:6343:Family:Lachnospiraceae  
AACGTAGGGGGCAAGCGTTATCCGGAATTACTGGGTGTAAAGGGTGCCTAGGTGGCATGGTAAGTCAGAAGTAAAAGCCC  
GGGGCTTAACCCCGGACTGCATTTGAAACTGTCATGCTGGAGTGCAGGAGAGGTAAGCGGAATTCAGGTTAGCGGTG  
GAATGCGTAGATATCGGAGGAACACCAGTGGCGAAGGCGGCTTACTGGGTACCAACTGACGCTGAGGCTCGAAAGTGTG  
GGTAG

>ASV:6344:Order:Clostridiales  
AACGTAGGTCACAAGCGTTGTCCGGAATTACTGGGTGTAAAGGGAGCGTAGACGGCAAGCAAGTCTGATGTGAAAACCC  
AGGGCTTAACCTGGGACTGCATTTGAAACTGTCGCTCGAGTGCAGGAGAGGTAGCGGAATTCAGGTTAGCGGTG  
GAATGCGTAGATATCGGAGGAACACCAGTGGCGAAGGCGGCCCCCTGGACGAAGACTGACGCTCAGGTGCGAAAGCGTG  
GGGAG

>ASV:6345:Family:Carnobacteriaceae  
TACGTAGGGTGAAGCGTTGTCCGGAATTTATGGGCGTAAAGCGAGCGCAGGCGGTTTCTTAAGTCTGATGTGAAAAGCCC  
TCAGCTCAACTGGGAATTGCTTTGAAACTGTTAACTTGAAGTGCAGGAGAGGTAAGCGGAATTCATGTGTAGCGGTG  
AAATGCTTAGAGATCATAAGAACACCAGTGGCGAAGGCGGCTTACCAACTATTACTGACGTTGAGGCACGAAAGCGTG  
GGGAG

>ASV:6346:Class:Bacteroidia  
TACGGAGGGTGAAGCGTTAATCGGAACCCTGGGCGTAAAGCGCACGTAGGCGGCTTGGTAAGTCAGGGGTGAAATCCC  
ACAGCCCAACTGTGGAAGTGCATTTGAAACTGTTGACTAGAGAGTGTGCGGTAGGCGGAATGTATGGTGTAGCGGTG  
AAATGCTTAGATATCACGAAGAACCAGTGGCGAAGGCGGCTGCTGGACTGTAACGACGCTGATGCTCGAAAGTGTG  
GGTAT

>ASV:6347:Genus:Samsonia  
AACGTAGGTCACAAGCGTTGTCCGGAATTACTGGGTGTAAAGGGAGCGCAGGCGGGAAGACAAGTTGGAAGTAAAATCTA  
TGGGCTCAACCTGGAAGTGCATTTGAAACTGGCAGGCTAGAGTCTTGTAGAGGGGGTGAATTCAGGTTAGCGGTG  
AAATGCGTAGAGATCTGAGGAATACCAGTGGCGAAGGCGGCCCCCTGGACAAAGACTGACGCTCAGGTGCGAAAGCGTG  
GGGAG

>ASV:6348:Family:Clostridiaceae\_1  
AACGTAGGTCACAAGCGTTGTCCGGAATTACTGGGTGTAAAGGGAGCGCAGGCGGGAAGGCAAGTTGGAAGTAAAATCCA  
TGGGCTCAACTTGGGTGCTGCATTTCAAACCTGGAAGTCTAGAGTGCAGGAGAGGAGAATGGAATTCCTAGTGTAGCGGTG  
AAATGCGTAGAGATTAGGAAGAACCAGTGGCGAAGGCGGCTTGTGGACTGATGACGTTGAGGCTCGAAAGCGTG  
GGGAG

>ASV:6349:Genus:Candidatus\_Soleaferrea  
TACGTAGATGGCGAGCGTTGTCCGGAATTACTGGGTGTAAAGGGAGTGTAGGCGGGATCATAAGTTGCGTGTGAAATGCG  
GGGGCTCAACCCCTGAACTGCGCGCAAACCTGTTGTTCTTGAAGTGAAGTAGAGGCGAGGCGGAATTCCTAGTGTAGCGGTG  
AAATGCGTAGATATTAGGAGGAACACCAGTGGCGAAGGCGGCTGCTGGACTGTTACTGACACTGAGGCACGAAAGCGTG  
GGGAG

>ASV:6350:Class:Bacteroidia  
TACGTAGGGAGCAAGCGTTGTCCGGATTTACTGGGTGTAAAGGGTGCCTAGGCGGCTTTCGAAGTCAGATGTGAAAGCTA  
TGGGCTCAACCCATAAACTGCTTTCAAACCTGTTTTCTTGAAGTACAGTAGAGGTGGGCGGAATTCGTGGTGTAGCGGTG  
AAATGCTTAGATATCACACAGAACCAGTGGCGAAGGCGGCTTCCAAGCTATTACTGACGCTGAGGCACGAAAGCGTG  
GGGAG

>ASV:6351:Kingdom:Bacteria  
TACGGAGGATCAAGCGTTATCCGGATTTATGGGTTAAAGGGTGCCTAGGCGGATAGGCAAGTCAGTGGTAAAATCTA  
TGGGCTTAACCCATAAACTGCCATTGAAACTGTTTCTTGAAGTGAAGTAGAGGCGAGGCGGAATTCAGGTTAGCGGTG  
AAATGCGTAGATATTAGGAGGAACACCAGTGGCGAAGGCGGCTTACTGGACGATGACTGACGCTGAGGCTCGAAAGCGTG  
GGGAG

>ASV:6352:Genus:DNF00809  
CACGTGGGGGGCGAGCGTTGTCCGGATTCATTGGGCGTAAAGCGCGCAGGCGGCCCTAAGCGGGACTCTAACCCC  
GGGGCTCAACCCCGGGCGGGTCCCGACTGGGCGGCTCGGGTGCAGTAGGGGGGACGGAATTCAGGTTAGCGGTGG  
AATGCGCAGATATCGGAGGAACACCAGCGGCGAAGGCGGCTCCCTGGGCCGTACCGACGCTGAGGCGCGAAAGCGGG  
GGAGC

>ASV:6353:Family:Ruminococcaceae  
AACGTAGGGTGAAGCGTTGTCCGGAATTACTGGGTGTAAAGGGAGCGCAGGCGGACCGGCAAGTTGGAAGTAAAATCCA  
CGGGCTCAACTCGTGAAGTGCATTTGAAACTGTTTTCTTGAAGTATCGGAGAGGCAATCGGAATTCAGGTTAGCGGTG  
GAATGCGTAGATATCGGAGGAACACCAGTGGCGAAGGCGGCTGCTGGACTGTTACTGACACTGAGGCACGAAAGCGTG  
GGGAG

>ASV:6354:Genus:Bacteroides  
AACGTAGGTCAGGCGTTGTCCGGATTTATGGGCGTAAAGCGAGCGCAGGCGGTTTGATAAGTCTGAAGTTAAAGGCT  
GTGGCTCAACCGTAAAATTGCAATTGATACTGGCAGTCTTGAAGTACAGTTGAGGTAGGCGGAATTCGTGGTGTAGCGGTG  
AAATGCTTAGATATCACGAAGAACCAGTGGCGAAGGCGGCTGCTAAGCTGCAACTGACATTGAGGCTCGAAAGTGTG  
GGTAT

>ASV:6355:Family:Lachnospiraceae  
AACGTAGGTCAGGCGTTGTCCGGATTTATGGGTGTAAAGGGAGCGTAGACGGCTGTGTAAGTCTGAAGTAAAACCC  
GGGGCTCAACCCCGGACTGCATTTGAAACTGTTGATCTGGAGTGCAGGAGAGGTAGGCGGAATTCAGGTTAGCGGTG

AAATGCGTAGAGATCGGGAGAACACCAGTGGCGAAGGCGGCTACTGGGCTTAACTGACGCTGAAGCACGAAAGCATG  
GGTAG  
>ASV:6356:Phylum:Firmicutes  
TACGGAGGATTCAAGCGTTATCCGGATTTATTGGGTTAAAGGGTGCCTAGGCGGTTTGATAAGTCTGAAGTTAAAGGCT  
GTGGCTCAACCATAGTTCGCTTTGGAACTGTCAAATTTAGTGCAGAGGGGAGAGTGAATTCCATGTGTAGCGGTGA  
AATGCGTAGATATATGGAGGAACACCAGTGGCGAAGGCGGCTTACTGGACGATGACTGACGCTGATGCACGAAGGCCAGG  
GGAGC  
>ASV:6357:Family:Ruminococcaceae  
TACGGAGGATTCAAGCGTTATCCGGATTTATTGGGTTAAAGGGTGCCTAGGCGGGATCGCAAGTCAGATGTGAAAACCTA  
TGGGCTTAACCCATAAACTGCATTTGAACTGTGGTCTTGGAGTGAAGTAGAGGTAAGCGGAATTCCTGGTGTAGCGGTG  
AAATGCGTAGAGATCAGGAGGAACATCGGTGGCGAAGGCGGATTGCTGGACGACAACGACGCTGAGGCGCGAAAGCGTG  
GGAG  
>ASV:6358:Phylum:Firmicutes  
TACGTATGGTCAAGCGTTATCCGGATTTATTGGGCTAAAGCGAGCGCAGGCGTTAGATAAGTCTGAAGCTAAAGGCT  
GTGGCTTAACCATAGTACGCTTTGGAACTGCCAATCTAGATATCGGAGAGGAAAGTGAATTCCATGTGTAGCGGTGA  
AATGCGTAGATATTAGGAAGAACACCAGTGGCGAAGGCGACTTCTGGACGAAAACGACGCTGAGGCGCGAAAGCCAGG  
GGAGC  
>ASV:6359:Family:Lachnospiraceae  
TACGTATGGAGCAAGCGTTATCCGGATTTACTGGGTGTAAGGGAGCGTAGACGGACTGGCAAGTCTGATGTGAAAGGCG  
GGGGCTCAACCCCTGGACTGCATTGAACTGTTGTTCTTGGAGTGAAGTAGAGGTAAGCGGAATTCCTGGTGTAGCGGTG  
AAATGCGTAGAGATCAGGAGGAACATCGGTGGCGAAAGCGGCTCTCTGGTCTGTAACGACGCTGAGGCTCGAAAGCGTG  
GGAG  
>ASV:6360:Family:Lachnospiraceae  
TACGTAGGTCAACCGTTGTCGGGAATTTACTGGGCTAAAGGGAGCGTAGACGGCACGGCAAGCCAGGTGTGAAAACCC  
GGGGCTCAACCCCGGACTGCATTTGAAATTTGCGACTAGATTGCCGGAGAGGTAAGCGGAATTCCTAGTGTAGCGGTG  
AAATGCGTAGATATTAGGAGGAACACCAGTGGCGAAGGCGGCTTACTGGACGGTGAATGACGCTGAGGCTCGAAAGCGTG  
GGAG  
>ASV:6361:Genus:Alistipes  
TACGGAGGATGCGAGCGTTATCCGGATTTATTGGGTTAAAGGGTGCCTAGGCGGATTAGTAAGTTAGAGGTGAAAGCTC  
GATGCTCAACATCGAAATTCCTGATACTGTTAGTCTAGAGTATAGTTGCCGGAAGGCGGAATGTGTGGTGTAGCGGTG  
AAATGCTTAGATATCACTTGGAAACCCGATAGCGAAGGCAGCTGTCCAGACTCGATCTGACGCTGATGCGCGAGAGCGTG  
GGTAG  
>ASV:6362:Family:Microscillaceae  
TACGTAGGTGGCAAGCGTTGTCGGATTTATTGGGTTAAAGGGTGCCTAGGCGGCTTATAAGTCAGTGTGAAATATC  
CCGGCTTAACCGGGAGGGTGGCATTGATACTGTAGGCTTGGAGTACAGATGAAGTAGCGGAATTCGAGGTTGTAGCGGTG  
AAATGCGTAGATATCGTCAAGAACACCAGTAGCGAAGGCAGCTTACTAAGCTGTAACGACGCTGAGGCACGAAAGTGTG  
GGGAT  
>ASV:6363:Genus:Erysipelatoclostridium  
TACGGAGGATCCGAGCGTTATCCGGATTTATTGGGCTAAAGAGGGAGCAGGCGGCAGCAAGGGTCTGTGGTGAAGCCT  
GAAGCTTAACCTCAGTAAGCCATAGAAACACAGGCAGCTAGAGTGCAGGAGAGGATCGTGAATTCATGTGTAGCGGTGA  
AATGCGTAGATATATGGAGGAACACCAGTGGCGAAGGCGAGTCTCTGGGCCGTTACTGACGCTGAGGAGCGAAAGCGTG  
GGAGC  
>ASV:6364:Family:Lachnospiraceae  
TACGTAGGGGGCAAGCGTTATCCGGATTTACTGGGTGTAAGGGAGCGTAGACGGTTAAGCAAGTCTGAAGTGAAGCCC  
GGGGCTCAACCCCGGACTGCTTTGGAACTGTTGACTTGGAGTGCAGCAGAGGTAGGCGGAATTCCTGGTGTAGCGGTG  
AAATGCGTAGATATCGAGAGGAACACTCGTGGCGAAGGCGGTTCTTGACATTAACGACGCTGAGGCACGAAGGCCAG  
GGAG  
>ASV:6365:Genus:Paraprevotella  
TACGGAGATGCGAGCGTTATCCGGATTTATTGGGTTGAAGGGAGCGTAGGCGGGCTTTAAGTCAGCGGTCAAATGCC  
ACGGCTCAACCGTGGCCAGCCGTTGAACTGCAAGCCTTGGAGTCTGCACAGGGCACATGGAATTCCTGGTGTAGCGGTGA  
AATGCTTAGATATCGGAAGAACCAATGGCGAAGGCGAGTCTCTGGGCCGTTACTGACGCTGAGGAGCGAAAGCGTG  
GGAGC  
>ASV:6366:Family:Enterobacteriaceae  
TACGTAGGTGGCGAGCGTTGTCGGGAATTTATTGGGCTAAAGAGCATGTAGGCGGCTTAAATAAGTCGAGCGTGAAGCCC  
GGGGCTCAACCCCGGACTGCTTTGGAACTGTTAACTAGAGTGTGGAGAGGTAAGCGGAATTCAGGTGTAGCGGTG  
AAATGCGTAGAGATCTGGAGGAATACCGGTGGCGAAGGCGGCCCTTGACGAAGACTGACGCTCAGGTGCGAAAGCGTG  
GGGAG  
>ASV:6367:Genus:Bilophila  
TACGGAGGGTCAAGCGTTAATCGGAATCACTGGGCTAAAGCGCACGTAGGCGGCTTGGTAAGTCAGGGGTGAAATCCC  
ACAGCCAACTGTGGAAGTGCCTTTGATACTGCCAGGCTTGGAGTACCAGGAGAGGGTGGCGGAATTCAGGTGTAGGAGTG  
AAATGCATAGATATAACTTAGAACTCCGATAGCGATGGCAGCTTACCAGACTGTAACGACGCTGATGCACGAGAGCGTG  
GGTAG  
>ASV:6368:Order:Bacteroidales  
TACGGAGGATCCGAGCGTTATCCGGATTTATTGGGTTAAAGGGAGCGTAGGCGGACGCTCAAGTCAGTTGTGAAAGTTT  
GCGGCCAACCGTAAATTTGCAAGTGTACTGGTGTCTTGGAGTGCAGTTGAGGCGAGGCGGAATTCCTGGTGTAGCGGTG  
AAATGCGTAGAGATCTGGAGGAATACCGGTGGCGAAGGCGGCCCTTGACGAAGACTGACGCTCAGGTGCGAAAGCGTG  
GGGAG  
>ASV:6369:Genus:Barnesiella

TACGGAGGATGCGAGCGTTATCCGGATTTATTGGGTTAAAGGGTGCCTAGGCGGCACGCCAAGTCAGCGGTGAAATTC  
CGGGCTCAACCCGGAATGTGCCGTTGAAACTGGCGAGCTAGAGTGCACAAGAGGCAGGCCGAATGCGTGGTGTAGCGGTG  
AAATGCATAGATATTAGGAGGAACACCCAGTGGCGAAGGAGGATTGCTGGACGATAACTGACGGTGAGGCCGAAAGCGTG  
GGGAG

>ASV:6370:Kingdom:Bacteria

TACGGAGGATCCGAGCGTTATCCGGATTTATTGGGTTAAAGAGAGCGTAGACGGCGTATCAAGTCTGATGTGAAAGGCA  
GGGGCTTAACCCCTGGACTGCATTGAAACTGGTATTCTTGAGTGAAGTAGAGGTTGGCGGAATTCGAGTGTAGCGGTG  
AAATGCGTAGATATTCCGAGGAACACCCGGTGGCGAAGGCGGCCAACTGGACTTTAACTGACGCTGAGGCACGAAAGCGTG  
GGTAT

>ASV:6371:Genus:Bacteroides

TACGGAGGATCCGAGCGTTATCCGGATTTATTGGGTTAAAGGGAGCGTAGGCGGGTGTAAAGTCAGTTGTGAAAGTTT  
GCGGCTCAACCGTAAATTCGAGTTGATACTGGATATCTTGAGTGCAGTTGAGGCAGGCCGAATTCGTGGTGTAGCGGTG  
AAATGCATAGATATAACTTAGAACTCCGATAGCGAGGGCAGCTTACCAGACTGTAACGACGCTGATGCACGAGAGCGTG  
GGTAG

>ASV:6372:Family:Enterobacteriaceae

TCCTTCTTTTCCCTCTTTCCCTCTTTCCCTCTTTCCCTCTCCCTCTTTCTTTTCTTTCCCTCTTTGAAATCCC  
CGGGCTCAACCTGGGAAGTGCATCTGATACTGGCAAGCTTGAGTCTCGTAGAGGGGGTGAATTCAGGTGTAGCGGTG  
AAATGCGTAGAGATCTGGAGGAATACCCGGTGGCGAAGGCGGCCCCCTGGACGAAGACTGACGCTCAGGTGCGAAAGCGTG  
GGGAG

>ASV:6373:Kingdom:Bacteria

TACGTATGTCGCAAGCGTTATCCGGATTTATTGGGCGTAAAGCGCGTCTAGGCGGTTTGGTAAGTCTGATGTGAAATGC  
GGGGCTCAACCCGGGACTGCATTTGAACTGTCAAGCTAGAGTGTGCGAGAGGAAAGCGGAATTCCTAGTGTAGCGGTG  
AAATGCGTAGATATTAGGAGGAACACCCAGTGGCGCAGGCGACGATCTGGCCTGCAACTGACGCTCAGTCCGAAAGCGTG  
GGGAG

>ASV:6374:Family:Bifidobacteriaceae

TACGTAGGTCGCCGAGCGTTGTCCGGATTTATTGGGCGTAAAGCGAGCGCAGGCGGTTTGATAAGTCTGAAGTTAAAGGCT  
GTGGCTCAACCATAGTTCGCTTTGGAACTGTCAAATCTGAGTGCAGAAGGGGAGAGTGAATTCGCGTCAACCGGTG  
AATGTGTAGATATTCCGGAAGAACACCAATGGCGAAGGCGAGTCTCTGGCCGTTACTGACGCTGAGGAGCGAAAGCGTGG  
GGAGC

>ASV:6375:Genus:Lachnoanaerobaculum

TACGGAAGATGCGAGCGTTATCCGGATTTACTGGGTGTAAGGGAGCGCAGACGGCAATGCAAGTCTGAAGTGAAAGGCG  
TGGGCTCAACCCATGAACTGCTTTGGAACTGTATAGCTTGAGTGTGCGAGGGGTAAGCGGAATTCCTAGTGTAGCGGTG  
AAATGCGTAGATATTAGGAGGAACACCCGAGGCGAAGGCGGCTTACTGGACGACAACCTGACGTTGAGGCTCGAAGGCGTG  
GGGAG

>ASV:6376:Family:Lachnospiraceae

TACGTATGGGGCAAGCGTTATCCGGATTTACTGGGTGTAAGGGTGCCTAGGCGGCTTTGCAAGTCAGATGTGAAATCTA  
TGGGCTCAACTGCGGACTGCTTTGGAACTGTTAACTGGAGTGTGCGAGAGGTAAGTGAATTCCTAGTGTAGCGGTG  
AAATGCGTAGATATTAGGAGGAACACCCAGTGGCGAAGGCGACTTACTGGACGATAACTGACGTTGAGGCTCGAAAGGTG  
GGTAT

>ASV:6377:Genus:Johnsonella

TACGTAGGGGGCAAGCGTTATCCGGATTTACTGGGTGTAAGGGAGCGTAGACGGCATATAAAGTCTGAAGTGAAATCCC  
GCAGCTCAACTGCGGAGTTGCTTTGGAACTTATAAGCTGGAGTGTGCGAGGGGTAAGCGGAATTCCTAGTGTAGCGGTG  
AAATGCGTAGATATTGGGAGGAACACCCGAGGCGAAGGCGGCTTACTGGAAGATAACTGACGTTGAGGCTCGAAGGCGTG  
GGTAG

>ASV:6378:Order:Clostridiales

TACGGAGGCAGCGAGCGTTATCCGGAATTTATTGGGCGTAAAGGGTGCCTAGGTTGTTAAGTCAAGTGTGAAAGTTT  
GCGGCTCAACTGCGGACTGCTTTGGAACTGCTTGCTCGAGTGCAGGAGGTAAGCGGAATTCCTAGTGTAGCGGTG  
AAATGCGTAGATATTAGGAGGAACACCCAGTGGCGAAGGCGGCTTACTGGACGTAAGTCAAGTGTGAAAGCGTG  
GGGAG

>ASV:6379:Genus:Cricetibacter

TACGTATGGTGCAAGCGTTATCCGGATTTACTGGGCGTAAAGGGCGTGCAGCCGGGCTGGCAAGTCAAGCGGTGAAATCCC  
AGGGCTCAACCCGGAAGTGCCTTTGGAACTGCTGGTCTTGAGTACCAGGAGAGGTCATCGGAATTCCTTGTGTAGCGGTG  
AAATGCGTAGAGATGTGGAGGAATACCGAAGGCGAAGGCGGCCCTTGGGAATGTACTGACGCTCATGTGCGAAAGCGTG  
GGGAG

>ASV:6380:Order:Clostridiales

TACGTAGGTGGCAAGCGTTATCCGGATTTACTGGGTGTAAGGGGCGTGCAGCCGGGCGGCAAGTCAAGTGTGAAATCCA  
CGAGCTTAACTGCGTGAAGTGCATTTGGAACTGTTGGTCTAGAGTGTGCGAGGGGTAAGTGAATTCCTAGTGTAGCGGTG  
AAATGCGTAGATATTAGGAGGAACACCCGGTGGCGAAGGCGGCTTACTGGCTTAACTGACGCTGAAGCACGAAAGCGTG  
GGGA

>ASV:6381:Family:Lachnospiraceae

TACGTATGGTGCAAGCGTTATCCGGATTTACTGGGTGTAAGGGGAGCGTAGACGGATGGACAAGTCTGATGTGAAAGGCT  
GGGGCTCAACCCGCGGACTGCATTTGGAACTGCCGCTCTGAGTGAAGTAGAGGTAGGCGGAATTCGCGTGTAGCGGTG  
AAATGCGTAGAGATCGGAGGAACACCCAGTGGCGAAGGCGGCTTACTGGCTTAACTGACGCTGAGGCACGAAAGCGTG  
GGTAG

>ASV:6382:Family:Lachnospiraceae

TACGGAAGGTCGGGCGTTATCTGGATTTACTGGGTGTAAGGGGAGCGCAGACGGCACTGCAAGTCTGAAGTGAAAGGCC  
GGGGCTCAACCCGCGGACTGCTTTGGAACTGTAGAGCTAGAGTGTGCGAGAGGCAAGCGGAATTCCTAGTGTAGCGGTG  
AAATGCGTAGAGATCTGGAGGAATACCCGGTGGCGAAGGCGGCCCCCTGGACGAAGACTGACGCTCAGGTGCGAAAGCGTG

GGGAG

>ASV:6383:Kingdom:Bacteria

TACGGAAGATGCGAGCGTTATCCGGATTTATTGGGTTTAAAGGGAGCGTAGGCGGGCTTTAAGTCAGAGGTGAAAAGGCT  
ACGGCTCAACCGTAGTAAGCCTTTGAAACTGGGAACTTGAGTGCAGGAGAGAGAGTGAATTCCATGTAGCGGTGA  
AATGCTTAGATATCACGAAGAACTCCGATTGCGAAGGCAGCTACTGGAGTGAACGTACGCTGATGCTCGAAAGTGTGG  
GTATC

>ASV:6384:Order:Lactobacillales

TACGGAAGGTCCGGGCTTATCCGGATTTATTGGGTTTAAAGGGAGCGTAGGCGGTAGATAAGTCTGAAGTTAAAGGCT  
GTGGCTTAACCATAGTACGCTTTGAAACTGTTTAACTTGAGTGCAGAAAGGGAGAGTGAATTCCATGTAGCGGTGA  
AATGCGTAGATATATGGAGGAACACCAAGTGGCGAAGGCAGCATCTGGCGCATAACTGACGCTCAGTCCGAAAGCGTGG  
GGAGC

>ASV:6385:Genus:Selenomonas\_3

TACGTAGGTGCGAGCGTTGTCCGGAATCATTGGGCGTAAAGGGAGCGCAGGCGGGCATGTAAGTCTTTCTTAAAGTTC  
GGGGCTCAACCCCGTATGGGAAAGAACTATGTGTCTTGAGTACAGGAGAGGAAAGCGGAATCCAGTGTAGCGGTGA  
AATGCGTAGATATTGGAGGAACACCAAGTGGCGAAGGCAGCTTTCTGGACTGCAACTGACGCTGAGGCTCGAAAGCCAG  
GGAGC

>ASV:6386:Genus:Phascolarctobacterium

TACGTAGGTGCGAGCGTTGTCCGGAATCATTGGGCGTAAAGGAGCATGTAGGCGGTTTTTAAAGTCTGGAGTGAATGTC  
GGGGCTCAACCCCGTATGGGCTCTGGATACTGGAAGACTTGAGTGCAGGAGAGGAAAGGGGAATCCAGTGTAGCGGTGA  
AATGCTTAGATATCACGAAGAACTCCGATTGTGAAGGCAGCTGCTAAGCTGCAACTGACATTGAGGCTCGAAAGTGTGG  
GTATC

>ASV:6387:Genus:Subdoligranulum

AACGTAGGGTGCAAGCGTTGTCCGGAATCATTGGGTTTAAAGGGAGCGCAGGCGGACCGCAAGTTGGAAGTGAACCTA  
TGGGCTCAACCCATAAATTGCTTTCAAAGCTGCTGGCCTTGAGTAGTGCAGAGGTAGGTGGAATCCCGGTATAGCGGTG  
GAATGCGTAGATATGACGCAGAAGCTCCGATTGCGAAGGCAGCATACCAACTCGGACTGACGCTGAGGCTCGAAAGCGTG  
GGTAT

>ASV:6388:Genus:Campylobacter

TACGGAGGGTGCAAGCGTTACTCCGGAATCATTGGGCGTAAAGGAGCGTAGGCGGATTATCAAGTCTCTTGAAATCTA  
GTGGCTTAACCTAACTGCTTGGGAACTGATAATCTAGAGTAAGGGAGAGGCAGATGGAATTCCTGGTGTAGGGGTA  
AAATCCGTAGAGATCAAGAAGAATACTTATTGCGAAGGCAGCTGCTAGAATTAAGTACGCTAATGCGTGAAGCGTG  
GGGAG

>ASV:6389:Phylum:Firmicutes

TACGGAAGATGCGAGCGTTATCCGGATTTATTGGGTTTAAAGGGAGCGCAGGCGGGATAGCAAGTCAGCTGTGAAAACCTA  
TGGGCTCAACCCATAAAGTGCAGTTGAACTGTTATCTTGAGTGGAGTAGAGGCAAGCGGAATCCATGTGTAGCGGTGA  
AAATGCGTAGATATATGGAGGAACACCAAGTGGCGAAGGCAGCTGCTGTAAGTACACTGATGCTCGAAAGTGTGG  
GGTAT

>ASV:6390:Family:Lachnospiraceae

TACGTAGGTGCGAAGCGTTATCCGGATTTACTGGGTTTAAAGGGAGCGTAGGCGGGATCGCAAGTCAGATGTGAAAGCTG  
GAGGCTCAACCTCCAGCCTGCATTTGAACTGTTTTGCTAGAGTGTCCGAGAGGTAAGTGAATTCCTAGTGTAGCGGTG  
AAATGCGTAGATATTAGGAGGAACACCAAGTGGCGAAGGCAGCTTACTGGACGATAACTGACGTTGAGGCTCGAAAGCGTG  
GGGAG

>ASV:6391:Order:Clostridiales

TACGTATGGTCAAGCGTTATCCGGATTTACTGGGTTTAAAGGGAGCGTAGACGGAGTGGAAGTCTGATGTGAAAACCC  
GGGGCTCAACCCGGGACTGCATTGAACTGTTATCTTGAGTGGAGTAGAGGCAAGCGGGATTCCGAGTGTAGCGGTG  
AAATGCGTAGATATTGAGGGAACACCAAGTGGCGAAGGCAGCTTCTGGGCTCTAACTGACGCTGAGGCTCGAAAGTGTG  
GGGAG

>ASV:6392:Class:Clostridia

TACGGAGGATCCGAGCGTTATCCGGATTTACTGGGCGTAAAGGGTGCCTAGGCGGCAATTTAAGTTGGATGTGAAATACC  
CGGGCTTAACCTGGGGGTGCATTCAAAGTGGATAGCTAGAGTACAGGAGAGGGAAGCGGAATTCCTAGTGTAGCGGTG  
AAATGCGTAGATATTAGGAGGAACACCGTGGCGAAGGCAGCTTCTGGACTGAAACTGACGCTGAGGCACGAAAGCGTG  
GGGAG

>ASV:6393:Family:Fusobacteriaceae

TACGTAGGTGCGAAGCGTTGTCCGGAATCATTGGGCGTAAAGCGCGCAGGCGGCTTCTTAAGTCCATCTTAAAAGTGC  
GGGGCTTAACCCCGTATGGGATGGAAGTGCCAAAGTACTGAGAGGTAAGCGGAATTCCTAGTGTAGAGGTGA  
AAGTCGTAGATATTTGTAGGAATGCCGATGGGGAAGCCAGCTACTGGACAGATACTGACGCTAAAGCGCGAAAGCGTGG  
GTAGC

>ASV:6394:Genus:Prevotella

TACGGAAGGTCCGGGCTTATCCGGATTTATTGGGTTTAAAGGGAGCGTAGGCTGTCTATTAAGCGTGTGTGAAATATA  
CCGGCTCAACCGGTGGCTTGCAGCGCAACTGGTGCAGTATGAGTATGCAGGAAGTAGGCGGAATTCATGGTGTAGCGGTG  
AAATGCGTAGATATTGAGGGAACACCGTGGCGAAGGCAGCTTACTGGGCTTAACTGACGCTGAGGCTCGAAAGCGTG  
GGGAG

>ASV:6395:Species:hominis

TACATAGGTGCGAAGCGTTATCCGGAATCATTGGGCGTAAAGCGTTCGAGGCTGTTTGTAAAGTCTGGAGTTAAATCCC  
GGGGCTCAACCCGGCTCGCTTTGGATACTAGCAAAGTACTAGATAGAGGTAAGCGGAATTCATGTGAAGCGGTGA  
AATGCGTAGATATATGGAAGAACCAAGGCGAAGGCAGCTTACTGGGCTTAACTGACGCTGAGGACGAAAGCGTGG  
GGAGC

>ASV:6396:Genus:Alloprevotella

TACGGAAGGTCCGGGCTTATCCGGAATCATTGGGTTTAAAGGGAGCGCAGGCGGGAGTATAAGTCAAGTGTAAATATC





>ASV:6410:Kingdom:Bacteria  
TACGGAGGATTCAAGCGTTATCCGGATTTATTGGGTTAAAGGGAGCGTAGGCGGGTGCTTAAGTCAGTTGTGAAAAGTTT  
GCGGCTCAACCGTAAAATTGCAGTTGATACTGGGCGCCTTGAGTGCAGAAGAGGACAGTGGAAGTCCATGTGTAGCGGTG  
AAATGCGTAGATATATGGAAGAACCACAGTGGCGAAGGCGGCTGTCTGGTCTGTAAC TGACGCTGAGGCTCGAAAGCATG  
GGTAG

>ASV:6411:Genus:Angelakisella  
TACGTAGGGAGCGAGCGTTGTCCGGAATTACTGGGTGTAAGGGAGCGTAGGCGGGAAGGCAAGTTGGATGTGAAAAGT  
TGGGCTCAACCGTAAAATTGCTTTCAAAGTGTGGGACTAGAGTACGGGAGAGGAAAGCGGAATTCCTAGTGTAGCGGTG  
AAATGCTTAGAGATCATACAGAACCAGGATTGCGAAGGCAGCTTACCAAATATATCTGACGTTGAGGCACGAAAGCGTG  
GGGAG

>ASV:6412:Class:Clostridia  
TACGTAGGGAGCGAGCGTTGTCCGGAATTACTGGGCGTAAAGGGTGCCTAGGCGGCTCTGTAAGTTGGATGTGAAAATCC  
CGGGCTCAACCGTGGGGGGTGCATGCAAAACTGTGGGACTAGAGTACGGGAGAGGAAAGCGGAATTCCTAGTGTAGCGGTG  
AAATGCGTAGATATTAGGAGGAACACCGTGGCGAAGGCGGCTTTCTGGACCGAAACTGACGCTGAGGCACGAAAGCGTG  
GGGAG

>ASV:6413:Family:Ruminococcaceae  
TACGTAGGGGGCAAGCGTTGTCCGGAATGATTGGGCGTAAAGGGCGCGTAGGCGGCTGGTAAGTTTGAAGTAAAAGTCC  
TTCTTTTAAGGAGGGAAGTGCATGCAAAACTGTGAGTGTAGGAGGAGGCAAGCGGAATTCCTAGTGTAGCGGTG  
GAATGCGTAGATATCGGAGGAACATCAGTGGCGAAGGCGGCTACTGGGCACCAACTGACGCTGAGGCTCGAAAGTGTG  
GGTAG

>ASV:6414:Family:Ruminococcaceae  
TACGTAGGTGGCGAGCGTTATCCGGAATTACTGGGTGTAAGGGTGTAGGCGGGACGACAAGTCAGATGTGAAAATTTG  
CAGGCTCAACCGTAAAATTGCTTTCAAAGTGTGAGTGTAGGAGGAGGCAAGCGGAATTCCTAGTGTAGCGGTG  
GAATGCGTAGATATCGGAGGAACACCGTGGCGAAGGCGGCTTTCTGGACTGAAACTGACGCTGAGGCACGAAAGCGTG  
GGGAG

>ASV:6415:Genus:Angelakisella  
AACGTAGGGTGCAGCGTTGTCCGGAATTACTGGGTGTAAGGGAGCGCAGGCGGGAAGGCGAGTTGGATGTGAAAAGT  
TGGGCTCAACCGTAAAATTGCTTTCAAAGTGTGAGTGTAGGAGGAGGCAAGCGGAATTCCTAGTGTAGCGGTG  
AAATGCGTAGAGATGGGAGGAACACCGTGGCGAAGGCGGCTTTCTGGACTGAAACTGACGCTGAGGCACGAAAGCGTG  
GGTAG

>ASV:6416:Genus:Dialister  
TACGTAGGTGGCAAGCGTTGTCCGGAATTATTGGGCGTAAAGCGCGCAGGCGGCTTCTTAAGTCCATCTTAAAAGTGC  
GGGGCTTAACCCCGTATGGGATGGAAGTGAAGAGGCTGAGATATCGGAGAGGAAAGTGAATTCCTAGTGTAGCGGTGA  
AATGCGTAGAGATTAGGAAGAACTCCGATTGCGAAGGCAGCTGCTAAGCTGCAACTGGCATTGAGGCTCGAAAGTGTG  
GTATC

>ASV:6417:Species:yanoikuyae  
TACGGAGGGAGCTAGCGTTGTCCGGAATTACTGGGCGTAAAGCGCACGTAGGCGGCTATTCAAGTCAGAGGTGAAAGCCC  
GGGGCTCAACCCCGAAGTGCCTTTGAAACTAGATAGCTTGAATCCAGGAGAGGTGAGTGAATTCAGAGTGTAGAGGTG  
AAATTCGTAGATATTCGGAAGAACCACCGTGGCGAAGGCGGCTACTGGACTGGTATTGACGCTGAGGTGCGAAAGCGTG  
GGGAG

>ASV:6418:Family:Lachnospiraceae  
TACGTATGGTGCAGCGTTATCCGGATTTACTGGGTGTAAGGGAGCGTAGACGGCTGTGTAAGTCTGAAGTAAAAGCCC  
GGGGCTCAACCCATAAATTGCTTTCAAAGTGTGCGCTTGGTGTAGTGCAGAGGTAGGTGGAATTCCTAGTGTAGCGGTG  
GAATGCGTAGATATTAGGAAGAACCAGTGGCGAAGGCAGCTTACCAAATATATCTGACGTTGAGGCACGAAAGCGTG  
GGGAG

>ASV:6419:Class:Bacteroidia  
TACGTATGGGAAAGCGTTATCCGGATTTATTGGGTTAAAGGGTGCCTAGGCGGTTTATGTAAGTCAAGCGGTGAAATTTT  
GGTGTAAACACCAAACGTGCCGTTGATACTGCTGGGCTAGAGAGTGTGCGGTAGGCGGAATGTATGGTGTAGCGGTG  
AAATGCGTAGAGATCGGTAGGAACACCGTGGCGAAGGCGGCTTTCTGGACTGAAACTGACGCTGAGGCACGAAAGCGTG  
GGGAG

>ASV:6420:Family:Ruminococcaceae  
TACGTAGGTGGCAAGCGTTGTCCGGAATTACTGGGTGTAAGGGAGCGTAGCAGGCTGTGTAAGTCTGAAGTAAAAGCCC  
AGGCTCAACCTCAAAGTGCATTTGAAACTGTGCGACTAGAGTGTGCGAGGGGTAAGTGAATTCCTAGTGTAGCGGTGA  
AATGCGTAGATATTAGGAGGAACACCGTGGCGAAGGCGGCTTACTGGACGATTACTGACGCTGAGGCTCGAAAGTGTG  
GTAGC

>ASV:6421:Genus:Angelakisella  
TACGTAGGGAGCGAGCGTTGTCCGGAATTACTGGGTGTAAGGGAGCGTAGGCGGGAAGGCAAGTTGGATGTGAAAAGT  
TGGGCTTAACCGTAAAATTGCTTTCAAAGTGTGGGACTAGAGTGTGCGAGGGGTAAGTGAATTCCTAGTGTAGCGGTG  
AAATGCGTAGATATTAGGAGGAACCGATTGCGAAGGCAGCTTACCAAATATATCTGACGTTGAGGCACGAAAGCGTG  
GGGAG

>ASV:6422:Genus:Erysipelatoclostridium  
TACGGAGGATTCAAGCGTTATCCGGATTTATTGGGCGTAAAGAGGGAGCAGGCGGCAGCAAGGGTCTGTGGTAAAAGACT  
GAAGCTTAACCTCAGTAAGCCATAGAAACCGGCGAGTGTGAGTGCAGGAGAGGATCGTGAATTCCTAGTGTAGCGGTGA  
AATGCGTAGATATTAGGAAGAACCACCGTGGCGAAGGCGGCTTACTAACCTGTAAGTGTGATGCTCGAAAGTGTG  
GTATC

>ASV:6423:Family:Fusobacteriaceae  
TACGGAGGATCCGAGCGTTATCCGGATTTACTGGGTGTAAGGGAGCGTAGACGGTTGTGTAAGTCTGATGTGAAAAGCCC  
GGGGCTCAACCCGGGACTGCATTGGAAGTATGTAAGTGTGAGTGTGAGAGGAGGAGGCAAGCGGAATTCCTAGTGTAGAGGTG

AAATTCGTAGATATTTGTAGGAATGCCGATGGGGAAGCCAGCCTACTGGACAGATACTGACGCTAAAGCGCGAAAGCGTG  
GGTAT  
>ASV:6424:Genus:Negativibacillus  
TACGTAGGTGGCAAGCGTTGTCCGGAATTACTGGGTGTAAAGGGAGCGTAGGCGGGGAGACAAGTTGAATGTCTAAACTA  
TCGGCTTAACCTGATAGTCGCGTTCAAACCTATCACTCTTGTAGTGCAGTAGAGGTAGGCGGAATTCCTAGTGTAGCGGCA  
AATGCTTAGATATCACGAAGAAGCTCCGATTGCGAAGGCAGCCTGCTAAGCTGCAACTGACATTGAGGCTCGAAAGTGTGG  
GTATC  
>ASV:6425:Family:Lachnospiraceae  
TACGTAGGGGGCAAGCGTTATCCGGATTTACTGGGTGTAAAGGGAGCGTAGACGGCATGGCAAGCCAGATGTGAAAGCC  
GGGGCTCAACCCCGGATTGCATTTGAACTGGCGAGCTAGAGTACAGGAGAGGAAAGCGGAATTCCTAGTGTAGCGGTG  
AAATGCGTAGATATTAGGAGGAACATCAGTGGCGAAGGCGGCTTACTAACTATAACTGACGCTGATGCTCGAAAGTGTG  
GGTAT  
>ASV:6426:Family:Clostridiaceae\_1  
TACGTAGGTGGCAAGCGTTGTCCGGAATTATTGGGCGTAAAGAGCATGTAGGCGGGCTTTTAAGTCTGACGTAAAAATGC  
GGGGCTTAACCCCGTATGGCGTTGGATACTGGAAGTCTAGAGTGCAGGAGAGGAGAATGGAATTCCTAGTGTAGCGGTGA  
AATGCGTAGAGATTAGGAAGAACACCAAGTGGCGAAGGCGATTCTCTGGACTGTAAGTACACTGAGGCTCGAAAGTGTGG  
GTATC  
>ASV:6427:Genus:Anaerostipes  
TACGTAGGGGGCAAGCGTTATCCGGAATTACTGGGTGTAAAGGGTGCCTAGGTGGTATGGCAAGTCAGAAGTAAAACCC  
AGGGCTTAACCTGGGACTGCTTTTAAAAGTGTGAGTGGAGTGCAGGAGAGGTAAGCGGAATTCCTAGTGTAGCGGTG  
AAATGCTTAGAGATCATAACAGAACACCGATTGCGCAGGCAGCTTACCAAATATATCTGACGTTGAGGCACGAAAGCGTG  
GGAG  
>ASV:6428:Order:Lactobacillales  
TACGTAGGTCCCAGCGTTGTCCGGAATTTATTGGGCGTAAAGCGAGCGCAGGCGGTTTAATAAGTCTGAAGTTAAAGGCA  
GTGGCTTAACCTATTGTCGCTTTGAAACTGTAGACTTGTAGTGCAGAAGGGGAGTGAATTCATGTGTAGCGGTGAAA  
TGCTTAGATATCACGAAGAAGCTCCGATTGCGAAGGCAGCTTGTCTGGACTGTAAGTACACTGACGCTGATGCTCGAAAGTGTGGT  
ATCAA  
>ASV:6429:Genus:Pseudonocardia  
CACGTAGGGTGCAGCGTTGTCCGGAATTTATTGGGCGTAAAGAGCTCGTAGGCGGTGTGTCCGCTCGGCGGTGAAAACCT  
GGGGCTTAACCTGAGCGTGCAGTGCATACGGGCATCACTTGTAGTTCGGCAGGGGAGACTGGAATTCCTGGTGTAGCGGT  
GAAATGCGCAGATATCAGGAGGAACACCGGTGGCGAAGGCGGGTCTCTGGGCCGATACTGACGCTGAGGAGCGAAAGCGT  
GGGG  
>ASV:6430:Family:Lachnospiraceae  
TACGTATGGGGCAAGCGTTATCCGGAATTTACTGGGTGTAAAGGGAGCGTAGGCGGCATGGCAAGTCAGAAGTAAAAGCCT  
GGGGCTCAACCCCGAATTGCTTTTAAAAGTGTGAGTGCAGGAGAGGTAAGCGGAATTCCTAGTGTAGCGGTG  
AAATGCGTAGATATTAGGAGGAACATCAGTGGCGAAGGCAGCCTGCTAAGCTGCAACTGACATTGAGGCTCGAAAGTGTG  
GGTAT  
>ASV:6431:Genus:Dialister  
TACGTAGGTGGCAAGCGTTGTCCGGAATTTATTGGGCGTAAAGCGCGCAGGCGGCTTCCCAAGTCCCTCTTAAAAGTGC  
GGGGCTTAACCCCGTATGGGAAGGAAACTGGGAAGCTGGAGTATCGGAGAGGAAAGTGAATTCCTAGTGTAGCGGTGA  
AATGCGTAGAGATCGGAAAGAACAACCGGCGAAGCACTCTGCTGGGCCGACACTGACACTGAGAGACGAAAGCTAGG  
GGAG  
>ASV:6432:Family:Lachnospiraceae  
TACGGAGGATCCGAGCGTTATCCGGAATTTATTGGGTTTAAAGGGAGCGTAGATGGCGAGGCAAGCCAGAAGTAAAACCC  
GGGGCTCAACCCCGGATTGCTTTTAAAAGTGTGATGCTAGAGTGCAGGAGGGGTGAGCGGAATTCCTAGTATAGCGGTG  
AAATGCGTAGATATTAGGAGGAACACCAAGTGGCGAAGGCGGCTTACTGGACGATCACTGACGTTGAGGCTCGAAAGCGTG  
GGAG  
>ASV:6433:Phylum:Firmicutes  
TACGTAGGGGGCGAGCGTTATCCGGAATTTACTGGGTGTAAAGGGAGCGTAGGCGGCATGGTAAGCCAGATGTGAAAGCCT  
TGGGCTTAACCCCGTATGGGAAGGAAACTGGGAAGCTGGAGTATCGGAGAGGAAAGTGAATTCCTAGTGTAGCGGTGA  
AATGCGTAGAGATTAGGAAGAACAACCGGTGGCGAAGGCGACTTCTGGACGAAAAGTACGCTGAGGCGCGAAAGCGTGG  
GGAG  
>ASV:6434:Family:Lachnospiraceae  
AACGTAGGGTGCAGCGTTGTCCGGAATTTACTGGGTGTAAAGGGTGCCTAGGTGGCAAGGCAAGTCAGATGTGAAAGCC  
GGGGCTCAACCCCGTACTGCATTTGAAACTGTCTAGCTAGAGTGCAGGAGAGGTAAGCGGAATTCCTAGTGTAGCGGTG  
AAATGCGTAGATATCGGGTGGAAACACCGGTGGCGAAGGCGGCTTCTGGGCCGAGACGACGCTGAGGCGCGAAAGCTGG  
GGAG  
>ASV:6435:Family:Lachnospiraceae  
TACGGAGGGTGCAGCGTTAATCCGGAATTTACTGGGCGTAAAGCGCACGAGGCGGTTTGTAAAGTCAAGTGTGAAATCCC  
CGGGCTCAACCCCGTACTGCATTTGAAACTGTCTAGCTAGAGTGCAGGAGAGGTAAGCGGAATTCCTAGTGTAGCGGTG  
AAATGCGTAGATATTAGGAGGAACACCAAGTGGCGAAGGCGGCTTACTGGACGATAACTGACGTTGAGGCTCGAAAGCGTG  
GGAG  
>ASV:6436:Family:Bifidobacteriaceae  
TACGTAGGTGGCAAGCGTTGTCCGGAATTTATTGGGCGTAAAGAGCATGTAGGCGGGCTTTTAAGTCCGACGTGAAAATGC  
GGGGCTTAACCGTGGATCTGCGCCGGTACGGGCGGGCTGGAGTGCAGTGGGGAGACTGGAATTCCTGGTGTAGCGGTG  
GAATGCGTAGATATCGGGAGGAACACCAAGTGGCGAAGGCGGCTTACTGGCACCAACTGACGCTGAGGCTCGAAAGCATG  
GGTAG  
>ASV:6437:Family:Enterobacteriaceae

TACGTAGGTGGCAAGCGTTGTCCGGATTTACTGGGCGTAAAGCGCACGCAGGCGGTCTGTCAAGTCGGATGTGAAATCCC  
CGGGCTCAACCTGGGAAGTGCATTGAAACTGGCAGGCTAGAGTCTTGTAGAGGGGGGTAGAATTCAGGTGTAGCGGTG  
AAATGCGTAGATATCGGGAGGAACACCAGTGGCGAAGGCGGCTACTGGGCACCAACTGACGCTGAGGCTCGAAAGTGTG  
GGTAG

>ASV:6438:Family:Lachnospiraceae

TACGTAGGTGGCAGCGTTATCCGGATTTACTGGGTGTAAGGGAGCGTAGACGGCACGGCAAGCCAGATGTGAAAGCCC  
GGGGCTCAACCCCGGAATGGCTTTGAAACTGTGCAGCTAGAGTACCGGAGGGGTAAGCGGAATTCCTAGTGTAGCGGTG  
AAATGCGTAGATATATGGAAGAACACCAGTGGCGAAGGCGGCTCTGGTCTGGATTCTGACACTGAAGCACGAAAGCGT  
GGGA

>ASV:6439:Family:Lachnospiraceae

TACGTATGGTGAAGCGTTATCCGGATTTACTGGGTGTAAGGGAGCGCAGACGGCGATGCAAGTCTGGAGTAAAGCCC  
GGGGCTCAACCCCGGACTGCTTTGAAACTGTTTTCTTGGAGTGCAGGAGAGGAAAGCGGAATTCCTAGTGTAGCGGTG  
AAATGCGTAGATATTGGGAAGAACACCAGTGGCGAAGGCGGCTTTCTGGACTGTAACGACGCTGAGGCTCGAAAGCTAG  
GGTAG

>ASV:6440:Order:Clostridiales

TACGTAGGGGCTAGCGTTATCCGGAAATTTACTGGGCGTAAAGGGTGCCTAGGCGGTCTTTAAGTCAGGAGTTAAAGGCT  
GTGGCTCAACCATAGTTCGCTTTGAAACTGTCAAATTTAGTGCAGAAGGGGAGAGTGAATTCATGTGTAGCGGTG  
AAATGCGTAGATATTAGGAGGAACATCAGTGGCGAAGGCGGCTTACTGGACTGAAACTGACACTGAGGCACGAAAGCGTGG  
GGAG

>ASV:6441:Order:Bacteroidales

TACGTAGGTCCCAGCGTTGTCCGGATTTATTGGGCGTAAAGCGAGCGCAGGCGGTTTGATAAGTCTGAAGTTAAAGGCT  
GTGGCTCAACCATAGAAATGCGCTTTGAAACTGGGGGCTTGGAGTATGTTTGGAGCAGGCGGAATTCGTGGTGTAGCGGTG  
AAATGCTTAGATATCAGGAAGAACCCGATTGCGAAGGCAGCCTGCTAAGCTGCAACTGACATTGAGGCTCGAAAGTGTG  
GGTAT

>ASV:6442:Genus:Bilophila

TACGTAGGTCCCAGCGTTGTCCGGATTTATTGGGCGTAAAGCGCACGTAGGCGGCTTGGTAAGTCAGGGGTGAAATCCC  
ACAGCCCAACTGTGGAAGTGCCTTTGATACTGCCAGGCTTGGAGTACCGGAGAGGGTGGCGGAATTCAGGTGTAGGAGTG  
AAATCCGTAGATATCTGGAGGAACACCAGTGGCGAAGGCAGCCTCCTGGGATAACACTGACGCTCATGCACGAAAGCGTG  
GGGAG

>ASV:6443:Family:Lachnospiraceae

TACGTAGGGGCAAGCGTTATCCGGAAATTTACTGGGTGTAAGGGAGCGTAGGCGGCATGGTAAGCCAGATGTGAAAGCT  
TGGGCTTAACCCCGGACTGCTTTGAAACTGTAGAACTAGAGTGCAGGAGAGGTAAGTGAATTCCTAGTGTAGCGGTG  
AAATGCGTAGATATTAGGAGGAACACCAGTGGCGAAGGCAGCCCCCTGGGACATGACTGACGCTCATGCACGAAAGCGTG  
GGGAG

>ASV:6444:Family:Lachnospiraceae

TACGTAGGGGCAAGCGTTATCCGGATTTACTGGGTGTAAGGGAGCGTAGACGGAGCAGCAAGTCTGATGTGAAAGGCG  
GGGGCTCAACCCCGGACTGCTTTGAAACTGTAGAACTAGAGTGCAGGAGAGGTAAGCGGAATTCCTAGTGTAGCGGTG  
GAATGCGCAGATATCGGAAGAACACCAGTGGCGAAGGCAGCCTGCTGGGCCCAACTGACGCTGAGGCACGAAAGCTAG  
GGGAG

>ASV:6445:Family:Ruminococcaceae

TACGTAGGTGGCAAGCGTTGTCCGGAAATTTACTGGGTGTAAGGGAGCGTAGGCGGGCAGGCAAGTCAGGCGTGAATATA  
TCGGCTCAACCCGGTAACGGCGCTTGAAGTGCAGGCTTGGAGTGAAGTAGAGGTTGGCGGAATTCCTAGTGTAGCGGTG  
AAATGCGTAGATATTACTCAGAACACCAGTGGCGAAGGCATCTCACGAGGAGTTCATTGACGCTGAGGCACGAAAGCGTGG  
GGATC

>ASV:6446:Phylum:Firmicutes

TACGTAGGTGGCAAGCGTTGTCCGGAAATTTACTGGGTGTAAGGGAGCGTAGGCGGGATGCCAAGTCAGCTGTGAAAAC  
TATGGGCTTAACCTGTAGACTGCAGTTGGAAGTGGTATTCTTGGAGTGAAGTAGAGGTTGGCGGAATTCAGTGTAGCGGTG  
AAATGCGTAGATATCAGCAGAACCCGATTGCGAAGGCAGCCTGCTAGGCTGCGACAGACGCTGAGGCACGAAAGCGTG  
GGTAT

>ASV:6447:Family:Ruminococcaceae

AACGTAGGTACAAGCGTTGTCCGGAAATTTACTGGGTGTAAGGGAGCGCAGGCGGGCGATCAAGTTGGAAGTGAATCCA  
TGGGCTCAACCCATGAAGTGCCTTTCAAACTGGTCGCTTGGAGTGGAGTAGAGGCAAGCGGAATTCAGTGTAGCGGTG  
AAATGCGTAGATATTGAGGGAACACCAATGGCGAAGGCAGCCTGCTAGGCTGCGACAGACGCTGAGGCACGAAAGCGTG  
GGTAT

>ASV:6448:Order:Clostridiales

TACGTAGGGAGCGAGCGTTGTCCGGAAATTTACTGGGCGTAAAGGGCGCTAGGCGGTGCAATAAGTCTGTTGTGAAATCC  
AAGGCTTAACCTTGGCAGTGCATTTGAAACTGTTTACTGGAGTACAGGAGAGGTAAGTGAATTCCTAGTGTAGCGGTG  
AAATGCGTAGATATTAGGAGGAACACCAGTGGCGAAGGCGACTTACTGGACTGCTACTGACACTGAGGCACGAAAGCGTG  
GGGAG

>ASV:6449:Family:Lachnospiraceae

TACGTAGGGGCTAGCGTTATCCGGAAATTTACTGGGCGTAAAGGGTGCCTAGGTTGGTTTCTAAGTCAGAGGTGAAAGGCT  
GGGGCTCAACCCCGGACTGCATTGAAACTGCCCGTCTTGGAGTGCAGGAGAGGTAAGCGGAATTCCTAGTGTAGCGGTG  
AAATGCGTAGATATTAGGAGGAACACCAGTGGCGAAGGCGACTTACTGGCACCAACTGACGCTGAGGCTCGAAAGCATG  
GGTAG

>ASV:6450:Family:Lachnospiraceae

TACGGAGGATTAAGCGTTATCCGGATTTATTGGGTTAAAGGGTGCCTAGGCGGTTTGATAAGTTAGAGGTGAAATTTCC  
GGGGCTCAACCCCGGACTGCATTGAAACTGTCAATCTAGAGTACCGGAGGGGTAAGTGAATTCCTAGTGTAGCGGTG  
AAATGCGTAGATATTAGGAGGAACACCAGTGGCGAAGGCGGCTTACTGGACGGTAACTGACGTTGAGGCTCGAGAGCGTG



ACGGCTCAACCGTGGAGGGTCATTGAACTGTTAACTTGGAGTGCAGGAGAGAAAAGTGAATTCCTAGTGTAGCGGTG  
AAATGCGTAGATATTAGGAGGAACACCAGTGGCGAAGGCGGCTTACTGGACGGTAACGACGTTGAGGCTCGAAAGCGTG  
GGGAG

>ASV:6465:Family:Pasteurellaceae

TACGTATGGAGCAAGCGTTATCCGGATTTACTGGGCGTAAAGGGAGCGTAGGCGGATTTTTAAGTGAGATGTGAAATACT  
CGGGCTTAACCTGAGTGTGCTGATTTCAAACCTGGAAGTCTAGAGTGCAGGAGAGGAGAAGGGAATTCCTAGTGTAGCGGTG  
AAATGCGTAGAGATGTGGAGGAATACCGAAGGCGAAGGCAGCCCTTGGGAATGACTGACGCTCATGTGCGAAAGCGTG  
GGGAG

>ASV:6466:Genus:Alcanivorax

TACGAAAGGTGCGAGCGTTAATCGGAATTACTGGGCGTAAAGCGCGCTAGGTGGTGTGTTAAGTCGGATGTGAAAGCCC  
TGGGCTCAACCTGGGAAGTGCATCCGATACTGGCACGCTAGAGTGCAGTAGAGGGAGGTGGAATTTCCGGTGTAGCGGTG  
AAATGCGTAGAGATCGAAGGAACACCAGTGGCGAAGGCGGCTCCTGGACTGACACTGACACTGAGGTGCGAAAGCGTG  
GGGAG

>ASV:6467:Genus:Dialister

TCCTTCTTTTTCCCTCTTTTTCTTCTTGGGCGTAAAGCGCGCAGGCGGCTTCCCAAGTCCCTCTTAAAAGTGC  
GGGGCTTAACCCGTGATGGGAAGGAACTGGGAAGCTGGAGTATCGGAGAGGAAAAGTGAATTCCTAGTGTAGCGGTG  
AATGCGTAGAGATTAGGAAGAACCCGGTGGCGAAGGCGACTTTCTGGACGAAAAGTACGCTGAGGCGCGAAAAGCGTG  
GGAGC

>ASV:6468:Kingdom:Bacteria

TACGGAGGATCCGAGCGTTATCCGGATTTATTGGGTTAAAGGGAGCGTAGGCGGGACGGTAAGTCAGGTGTGAAATATA  
CGTGCTCAACATGTAGACTGCATTTGAAACTGCTGTTCTTGGTGAAGTAGAGGTAAGCGGAATTCATGTGTAGCGGTG  
AAATGCGTAGATATAGGAGGAACACCAGTGGCGAAGGCGACGATCTGGCTGCAACTGACGCTCAGTCCCAGAAAGCGTG  
GGGAG

>ASV:6469:Family:Corynebacteriaceae

TACGTAGGGTCAAGCGTTGTCCGGATTTACTGGGCGTAAAGAGCTCATAGGTGGTGTGTCGCGTCTGTGAAATTC  
GGGGCTTAACCTCGGGCGTGCAGGCGATACGGGCACGACTAGAGTGTGTAGGGTAAGTGAATTCCTGTGTAGCGGT  
GAAATGCGTAGATATAGGGAGGAACACCAGTGGCGAAGGCGGCTTTCTGGACTGAAACTGACACTGAGGCACGAAAGTGT  
GGGGA

>ASV:6470:Kingdom:Bacteria

TACGTAGGGAGCAAGCGTTGTCCGGATTTACTGGGTGTAAGGGTGCAGGCGGTTTGGTAAGTCAGAAGTGAATCCA  
TGGGCTTAACCCATGAACTGCTTTTGAACACTATCGAAGTGAAGTAGAGGTAGGCGGAATGTATGGTGTAGCGGTG  
AAATGCTTAGAGATCATACAGAACACCAGTGGCGAAGGCGAGCTTACCAAATATATCTGACGTTGAGGCACAAAAGCGTG  
GGGAG

>ASV:6471:Genus:Alistipes

AACGTAGGTCAACAGCGTTGTCCGGAATTTATGGGCGTGAAGCGCACGAGGCGGCTCTGTTAAGTCAGATGTGAAATCCC  
CGGGCTCAACCTGGGAAGTGCATCTGATACTGTTAGACTAGAGAGTAGTTGCGGTAGGCGGAATGTATGGTGTAGCGGTG  
AAATGCTTAGAGATCATACAGAACACCAGTGGCGAAGGCGAGCTTACCAAATATATCTGACGTTGAGGCACGAAAGCGTG  
GGGAG

>ASV:6472:Family:Bifidobacteriaceae

TACGTAGGTGCGAGCGTTATCCGGAATCATTGGGCGTAAAGAGGGAGCAGGCGGCCCAAGGGTCTGTGGTAAAGACC  
ATCGCTTAACCGTGGATCCGCGCCGGTACGGGCGGGCTTGGTGGTAGGGGAGACTGGAATTCCTGGTGTAAAGCGTG  
GAATGTGTAGATATCGGGAAGAACACCAGTGGCGAAGGCGAGGCTCTGGGCCCAACTGACGCTCATTCCCAGAAAGCGTG  
GGGAG

>ASV:6473:Order:Clostridiales

TACGTAGGGAGCAAGCGTTGTCCGGAATTTACTGGGCGTAAAGGGTGCAGGCGGCTTATTAAGTTATTAGTAAATACC  
CGGGCTTAACCTGGGGGTGCTAGTAAACTGATAGGCTTGGATTCGGGAGAGGAAAAGTGAATTCCTAGTGTAGCGGTG  
GAATGCGTAGATATTAGGAGGAACACCAGTGGCGAAGGCGACTTTCTGGACCGACACTGACGCTGAGGCACGAAAGCGTG  
GGGAG

>ASV:6474:Order:Gastraerophilales

TACGTAGGGTCAACAGCGTTGTCCGGAATCATTGGGCGTAAAGAGTTCGTAGGTGGCATGTAAAGTCTGGTGTAAAGGCA  
GAAGCTCAACTTCTGTAGGGCACTGGATACTTGAAGCTGGAATGCGGTAGAGGTAAGGGAATTCCTGGTGTAGCGGTG  
AAATGCTTAGATATCACGAAGAACTCCGATTGCGAAGGCGAGCTTACTGGATTGTAACGACGCTGATGCTCGAAAGTGTG  
GGTAT

>ASV:6475:Order:Clostridiales

TACGGAGGGTCAACAGCGTTAATCGGAATTTACTGGGCGTAAAGCGCGCTAGGTTGTTTTGTAAGTCAGAGGTGTAATCCC  
TCGGCTTAACCTGAGGAAGTGAACCTAAACTACTATTCTCGAGTGTGGAGAGGAAAAGTGAATTCCTAGTGTAGCGGTG  
AAATGCGTAGATATTAGGAGGAACACCAGTGGCGAAGGCGACTTTCTGGACAGTAACGACGTTGAGGCACGAAAGTGTG  
GGGAG

>ASV:6476:Genus:Kandleria

TACGTAGGTGGCGAGCGTTATCCGGAATCATTGGGCGTAAAGAGTTCGTAGGCGGTTTGTAAAGTCTAAGATTAAGCCC  
GAGGCTTAACCTCGGTTCTGTTTTAGAACTGGCAGACTTGGATATGGTAGAGGCAAATGGAATTCCTAGTGTAGCGGTG  
AATGCGTAGATATATGGAGGAACACCAGTGGCGAAGGCGAGGCTCTGGGCCGCAACTGACGCTCATTCCCAGAAAGCGTG  
GGAGC

>ASV:6477:Phylum:Firmicutes

TACGTAGGTGGCAAGCGTTATCCGGAATCATTGGGCGTAAAGAGGGAGCAGGCGGCCGCAAGGGTCTGTGGTAAAGACA  
TGGGCTCAACCTGTGGACTGATTGAAACTGTCATACTTGGTGGAGGGGTAAGCGGAATTCCTAGTGTAGCGGTG  
AAATGCGTAGAGATTAGGAAGAACACCAGTGGCGAAGGCGGCTTTCTGGACTGTAACGACGCTGAGGCTCGAAAGCGTG  
GGGAG

>ASV:6478:Class:Clostridia  
TACGTAGGTGGCGAGCGTTGTCCGGAATTACTGGGCGTAAAGGGCGCGTAGGCGGATCGTTAAGTTGGACGTGAAATACC  
CCGGCTCAACTGGGGGGCGACGTCCAAAACCTGGCGGACTAGAGTGCAGGAGAGGAAAGTAGAATCCCAGTGTAGCGGTG  
AAATGCGTAGATATCGGGAGGAACACCAAGTGGCGAAGGCGGCTACTGGGCACCAACTGACGCTGAGGCTCGAAAGTGTG  
GGTAG

>ASV:6479:Genus:Butyricimonas  
TACGTAGGGCGCAAGCGTTATCCGGATTTATTGGGCGTAAAGGGCTCGTAGGCGGCTCGTCGCGTCCGGTGTGAAAGTCC  
ATCGCTTAACCTCTGGCTGCGTTCAAACCTGCGGCTGGAGACGAGACGAGGAGCGGAAACAAGTGAAGTAGCGGTG  
AAATGCATAGATATCACTTGAACCCGATAGCGAAGGCAGCTTCCAGGCTCGGCTGACGCTGATGCGCGAGAGCGTG  
GGTAG

>ASV:6480:Phylum:Bacteroidetes  
TACGTAGGTGGCGAGCGTTGTCCGGAATTATTGGGCGTAAAGAGCATGTAGGCGGCTTAATAAGTCGAGCGTGAAATGC  
GGGGCTCAACCCCGTATGGCGCTGGAACCTGGTAGTCTTGTAGTGCAGCAGAGTAGGCGGAATTCGTGGTGTAGCGGTGA  
AATGCTTAGATATCACGAAGAATCCGATTGCGAAGGCAGCTCACTGGAGTGTAACTGACGCTGATGCTCGAAAGTGTGG  
GTATC

>ASV:6481:Genus:Acetanaerobacterium  
TACGTAGGGAGCAAGCGTTGTCCGGAATTACTGGGTGTAAGGGGAGCGTAGGCGGCTCGCAAGTTGAATGTGAAATCCA  
GAGGCTTAACCTCTGGCTGACGTTGAAACTGCGGCTTGTAGTGAAGTAGAGGCAGGCGGAATTCCTAGTGTAGCGGTG  
AATGCGTAGATATCGGGAGGAACACCAATGGCGAAGGCAGCTCTGGGCGGTTACTGACGCTGAGGAGCGAAAGCGTGG  
GGAGC

>ASV:6482:Class:Bacteroidia  
TACGTATGGTGCAAGCGTTATCCGGAATTACTGGGTGTAAGGGTGCCTAGGCGGTTTGGTAAGTCAGAAGTGAATCCA  
TGGGCTTAACCCATAAACTGCATTTGAAACTGTAGACTTGTAGTGCAGTTGAGGCAGGCGGAATTCGTGGTGTAGCGGTG  
AAATGCTTAGATATCACACAGAACACCGATTGCGAAGGCAGCTTCCAAAGCTATTACTGACGCTGAGGCACGAAAGCGTG  
GGTAG

>ASV:6483:Family:Ruminococcaceae  
TACGTAGGTGGTAAGCGTTGTCCGGAATTACTGGGTGTAAGGGTGCCTAGGCGGCGAGGCAAGTCAGCAGTGAATCCA  
TGGGCTTAACCCGACTGCTTTTGAACCTGCTTCTTGTAGTGAAGTAGAGGTAGGCGGAATCCCGGTGTAGCGGTG  
AAATGCGTAGATATCGGGAGGAACACCAAGTGGCGAAGGCAGCTACTGGACTGTTACTGACGCTGAGGCGGAAAGTGTG  
GGGAG

>ASV:6484:Family:Lachnospiraceae  
TACGTATGGTGCAAGCGTTATCCGGAATTACTGGGTGTAAGGGGAGCGCAGGCGGTGCGGCAAGTCTGATGTGAAAGCCC  
GGGGCTCAACCCCGGACTGCTTTTGAACCTGCTAACTAGAGTGCAGGAGAGGATCGTGGAATTCATGTGTAGCGGTG  
AAATGCGTAGATATATGAGGAACACCAAGTGGCGAAGGCAGCTACTGGACTGCAACTGACGCTCAGTCCGAAAGCGTG  
GGGAG

>ASV:6485:Genus:Streptococcus  
TACGTAGGTCCCGAGCGTTATCCGGATTTATTGGGCGTAAAGCGAGCGCAGGCGGTTAGATAAGTCTGAAGTTAAAGGCT  
GTGGCTTAACCATAGTACGCTTTTGAACCTGTTTAACTTGTAGTGCAGAGGGGAGAGTGAATTCATGTGTAGCGGTGA  
AATGCGTAGATATCGGGAGGAACACCAAGTGGCGAAGGCAGCTCTGGGCGCTACTGACGCTGAGGAGCGAAAGCGTG  
GGAGC

>ASV:6486:Genus:Anaerofilum  
TACGTAGGTCCCGAGCGTTGTCCGGGTTTATTGGGCGTAAAGCGAGCGCAGGCGGTTTATAAGTCTGAAGTTAAAGGCT  
GTGGCTCAACCCATGAATTGCTTTCAAACCTGTTTTCTTGTAGTGCAGAGGTAGATGGAATTCGCGGTGTAGCGGTG  
GAATGCGTAGATATCGGGAGGAACACCAAGTGGCGAAGGCAGCTACTGGGCACCAACTGACGCTGAGGCTCGAAAGCATG  
GGTAG

>ASV:6487:Genus:Tibeticola  
TACGTAGGGGGCAAGCGTTATCCGGATTTACTGGGTGTAAGGGGAGCGTAGACGGTGTGGCAAGTCTGATGTGAAATCCC  
CGGGCTCAACCTGGGAACTGCATTTGTGACTGTATAGCTAGAGTACGGCAGAGGGGATGGAATTCGCGGTGTAGCAGTG  
AAATGCGTAGATATGCGGAGGAACACCGATTGCGAAGGCAATCCCCTGGGCTGTACTGACGCTCATGCACGGAAGCGTG  
GGGAG

>ASV:6488:Genus:Coprococcus\_1  
TACGTAGGGGGCAAGCGTTATCCGGATTTACTGGGTGTAAGGGGAGCGTAGGCGGCGGAGCAAGTCAGAAGTGAAGGCC  
GGGGCTCAACCCCGGACGGCTTTTGAACCTGCCCTGCTTATTTCAGGAGAGGTAAGCGGAACTCCTAGTGTAGCGGTG  
AAATGCTTAGATATACGAAGAACCTCGATTGCGAAGGCAGCTCACTGGAGCGCAACTGACGCTGAAGCTCGAAAGTGGC  
GGTAT

>ASV:6489:Genus:Lachnospiraceae\_UCG-010  
TACGTAGGGTGCAAGCGTTATCCGGAATTACTGGGTGTAAGGGTGTAGTAGGCGGCACGGCAAGTAAGTGTGAAAGCCC  
GAGGCTTAACCTCGGATTGCATTTTAACTGCTGAGCTAGAGTACAGGAGAGGAAAGCGGAAATTCCTAGTGTAGCGGTG  
AAATGCGTAGATATACGAAGAACACCGATTGCGAAGGCAGCTTACCAAATATATCTGACGTTGAGGCACGAAAGCGTG  
GGGAG

>ASV:6490:Family:Ruminococcaceae  
TACGTATGGAGCAAGCGTTATCCGGATTTACTGGGTGTAAGGGTGCCTAGGCGGATTGGCAAGTCAGAAGTGAATCCA  
TGGGCTTAACCCATGAAGTGTCTTTGAACTGTTTTCTTGTAGTGTGAGAGGCAGGCGGAAATTCGCTGTGTAGCGGTG  
AAATGCGTAGATATACGGAGGAACACCAATGGCGAAGGCAGCTGCTGGACGTTAACTGACGTTGAGGCTCGAAAGTGTG  
GGTAG

>ASV:6491:Kingdom:Bacteria  
TACAGAGGTCTCAAGCGTTGTTCCGGAATCACTGGGCGTAAAGCGTGCCTAGGCGGTTTCTGAAGTCTGTGTGAAAGGCG  
GGGGCTCAACCTCGGAATTGCCATTATGACTATTTAGCTAGAATGATGCAGAGGATAGCGGAATACCCAGTGTAGAGGTG

AAATGCTTAGAGATCATAACAGAACCCGATTGCGAAGGCAGCTTACCAAACTATATCTGACGTTGAGGCACGAAAGCGTG  
GGGAG  
>ASV:6492:Kingdom:Bacteria  
TACAGAGGTCTCAAGCGTTGTTTCGGAATCACTGGGCGTAAAGCGTGCCTAGGCGGTTTCGTAAGTCGTGTGAAAAGGCA  
GGGGCTTAACCCCTGGACTGCATTGAAAAGTCTGTGCTTGGAGTCCGGAGGGGTAAGCGGAATTCCTAGTGTAGCGGTG  
AAATGCGTAGATATACGAAGAACTCCGATCGCGAAGGCATTGTGCCGGGCAGCACTGACGCTGAGGCTCGAAAAGTGC  
GGTAT  
>ASV:6493:Class:Bacteroidia  
TACGGAGGATCCGAGCGTTATCCGGATTTATTGGGTTAAAGGGAGCGTAGGTGGATTGTTAAGTCAGTTGTGAAAAGTGC  
GGGGCTCAACCTCCAGCCTGCATTTGAAAAGTGTAGTCTTGGAGTAGTCAGAGGTAGGCAGAATTCCTGGTGTAGCGGTG  
GAATGCGTAGATATCGGGAGGAACACCAGTGGCGAAGGCAGCTTACTGGATTGTAACGACGCTGATGCTCGAAAAGTGTG  
GGTAT  
>ASV:6494:Class:Bacteroidia  
TACGGAGGGTCCGAGCGTTATCCGGATTTATTGGGTTAAAGGGTGCCTAGGCGGCCCTTAAGTCAGCGGTGAAAAGTCT  
GTGGCTCAACCATAGAATTGCCGTTGAAAAGTGGGAGGCTTGGAGTATGTTTGGAGCAGGTGGAATTCCTGGTGTAGCGGTG  
AAATGCGTAGAGATCAGGAGGAACATCGGTGGCGAAGGCAGCTTACTGGGCTTTACTGACGCTGAGGCGCGAAAAGCTGG  
GGGAG  
>ASV:6495:Order:Clostridiales  
TACGTATGGTCAAGCGTTATCCGGAATTTATTGGGCGTAAAGAGTTCGTAGGCGGTTTTTTAAGCGCGGGGTGAAAAGGCA  
ATGGCTTAACCATTTAGCCCTCGCAACTGGGAGACTTGGAGTGCAGGAGAGGAAAGCGGAATTCCTAGTGTAGCGGTGA  
AATGCGTAGATATCAGCAGAACTCCGATTGCGAAGGCAGCTTACTAAACCATAACTGACACTGAAGCACGAAAAGCTGG  
GGATC  
>ASV:6496:Family:Lachnospiraceae  
TACGGAGGATCCGAGCGTTATCCGGATTTACTGGGTGTAAGGGAGCGTAGACGGCTGTGTAAGTCTGAAGTAAAAGCC  
GGGGCTCAACCCCGGGACTGCTTTTAAAAGTGCAGGGCTAGAGTGCAGGAGGGGCAAGTGAATTCCTAGTGTAGCGGTG  
AAATGCGTAGATATTAGGAGGAACACCAGTGGCGAAGGCAGATTGCTGGACGATAACTGACGCTGAGGCGCGAAAAGTGTG  
GGGAG  
>ASV:6497:Genus:UBA1819  
TACGTAGGGAGCGAGCGTTGTCGGAATTTACTGGGTGTAAGGGAGCGCAGGCGGATTGGCAAGTTGGGAGTAAAATCTA  
TGGGCTCAACCCATAAATTGCTTTCAAAGTGTGAGTCTTGGTGTAGAGGTAGGCGGAATTCCTGGTGTAGCGGTG  
GAATGCGTAGATATTAGGAAGAACACCAGTGGCGAAGGCAGCTTCTGGACGAAAAGTGCAGCTGAGGCGCGAAAAGCCAG  
GGGAG  
>ASV:6498:Family:Bifidobacteriaceae  
TCCGTCGTTTTCCCTCTTTCTCCGGCTTCTTGGGCGTAAAGGGCTCGTAGGCGGTTCTGTCGCTCCGGTGTGAAAAGTCC  
ATCGCTTAACCGTGGATCCGCGCCGGGTACGGGCGGGCTTGGAGTGCAGGAGGGGAGACTGGAATTCCTGGTGTAAAGCGGTG  
GAATGTGTAGATATCGGGAGGAACACCAGTGGCGAAGGCAGCTTACTGGGCACCAACTGACGCTGAGGCTCGAAAAGTGTG  
GGTAG  
>ASV:6499:Family:Ruminococcaceae  
TACGTAGGTGGCAAGCGTTGTCGGAATTTACTGGGTGTAAGGGAGCGTAGACGGCATAACAAGTCTGATGTGAAAAGGCT  
GGGGCTTAACCCCGGGGCTGCGATTGAAAAGTGCAGCCTTGGAGTATCGGAGAGGAAAGCGGAATTCCTAGTGTAGCGGTG  
AAATGCGTAGATATTAGGAGGAACACCAGTGGCGAAGGCAGATTGCTGGACGACAAGTGCAGGCTGAGGCGCGAAAAGCGTG  
GGGAG  
>ASV:6500:Genus:Streptococcus  
TACGGAGGATCCGAGCGTTATCCGGATTTATTGGGTTAAAGGGAGCGTAGATGGGTTGTTAAGTCAGTTGTGAAAAGTTT  
GCGGCTCAACCATAGTTTCGCTTTGAAAAGTGTCAAAGTGGAGTGCAGAGGGGAGAGTGAATTCCTAGTGTAGCGGTGA  
AATGCGTAGATATAGGAGGAACACCAGTGGCGAAGGCAGCTTCTGGTCTGTAAGTGCAGCTGAGGCTCGAAAAGCTGG  
GGAGC  
>ASV:6501:Class:Bacteroidia  
TACGGAGGATCCGAGCGTTATCCGGATTTATTGGGTTAAAGGGAGCGTAGATGGGTTGTTAAGTCAGTTGTGAAAAGCTT  
GCGGCTCAACCGTAAAATTGCAAGTGTGAAAAGTGTGTTCTTGGAGTGCAGAGGGCAAAATGGAATTCCTAGTGTAGCGGTG  
AAATGCGTAGATATTAGGAAGAACACCAGTGGCGAAGGCAGATTGCTGGACAGTAAGTGCAGCTGATGCGCGAAAAGTGTG  
GGGAG  
>ASV:6502:Family:Ruminococcaceae  
TACGTAGGTGGCAAGCGTTGTCGGAATTTACTGGGTGTAAGGGAGCGTAGCCGGGAAGGCAAGTGCAGATGTGAAAATCCA  
CGGGCTTAACCTCGTGAAGTGTGTTTAAAAGTGTAAAGGCTAGAGTGCAGGAGGGGTGAGTGAATTCCTAGTGTAGCGGTG  
GAATGCGTAGATATACGGAGGAACACCAGTGGCGAAGGCAGCTTCTGGACATTAAGTGCAGCTGAGGCGCGAAAAGCGTG  
GGGAG  
>ASV:6503:Family:Ruminococcaceae  
TACGTAGGTGGCGAGCGTTGTCGGAATTTACTGGGTGTAAGGGAGCGTAGGCGGGAAGACAAGTTGGACGTCAAAATTTA  
TCGGCTTAACCGTAACCGGTTCAAAGTGTGTTTCTTGGAGTGAAGTAGAGGTTGGCGGAATTCCTAGTGTAGCGGTGA  
AATGCGTAGATATTAGGAGGAACACCAGTGGCGAAGGCAGCTTAAAGTGCAGCTGAGGCTCGAAAAGTGTG  
GTAGC  
>ASV:6504:Genus:Acidaminococcus  
TACGTAGGCGCAAGCGTTGTCGGAATTTATTGGGCGTAAAGAGCATGTAGGCGGGCTTTAAGTCTGACGTGAAAATGC  
GGGGCTTAACCCGATGGCGTTGGATACTGGAAGTCTTGGAGTGCAGGAGAGGAAAGGGGAATTCCTAGTGTAGCGGTGA  
AATGCTTAGAGATCATAACAGAACCCGATTGCGAAGGCAGCTTACCAAACTATATCTGACGTTGAGGCGCGAAAAGCGTG  
GGAGC  
>ASV:6505:Genus:Parabacteroides

TACGGAGGATCCGAGCGTTATCCGGATTTATTGGGTTAAAGGGAGCGTAGGCGGGTTGTTAAGTCAGTTGTGAAAATTT  
GCGGCTCAACCATAGAAATTGCCGTTGAAACTGGGGGCTTGGATGTTTGGAGGAGCGGGAATGCGTGGTGTAGCGGTG  
AAATGCATAGATATCACGCAGAACCCCGATTGCGAAGGCAGCTTCCAGGCTCGTTCGACGCTGATGCGCGAGAGCGTG  
GGTAG  
>ASV:6506:Family:Erysipelotrichaceae  
TACGTAGGTGCGAGCGTTATCCGGAATCATTGGGCGTAAAGAGGGAGCAGGCGGCAGTGCAGATCTGCGGTGAAAGACC  
GGAGCTAAACTTCGTAAGCCGTGAAACCGCACAGCTAGAGAGCATCAGAGGATCGCGGAATTCATGTGTAGCGGTGG  
AATGCGTAGATATCGGGAGGAACACCAGTGGCGAAGGCGACCTACTGGGCACCAACTGACGCTGAGGCTCGAAAAGCATG  
GTAGC  
>ASV:6507:Family:Bifidobacteriaceae  
AACGTAGTCCCGAGCGTTGTCCGGATTTATTGGGCGTAAAGCGAGCGCAGGCGGTTTGATAAGTCTGAAGTTAAAGGCT  
GTGGCTCAACCATAGTTCGTTTGGAACTGTCAAATTCAGTGCAGAAAGGGAGAGTGAATTCCCGGTGTAACGGTGG  
AATGTGTAGATATCGGGAAGAACCAATGGCGAAGGCGAGTCTCTGGGCCGCTACTGACGCTGAGGAGCGAAAAGCGTGG  
GGAGC  
>ASV:6508:Family:Lachnospiraceae  
TACGGAAGGTCCAGGCGTTATCCGGATTTACTGGGTGTAAGGGAGCGTAGACGGTAAAGCAAGTCTGATGTGAAAGCCC  
GGGGCCCAACCCGGAAGTGCATTGAAACTGCTGGGCTTGGTGCAGGAGAGGTAAGCGGAATTCCTAGTGTAGCGGTG  
AAATGCGTAGATATTAGGAGGAACACCAGTGGCGAAGGCGGCTACTGGGCACCAACTGACGCTGAGGCTCGAAAAGTGTG  
GGTAG  
>ASV:6509:Family:Lachnospiraceae  
TACGGAGGATTCGAGCGTTATCCGGATTTACTGGGTGTAAGGGTGCCTAGGTGGCAGTGCAGTGCAGATGTGAAAGGCC  
GGGGCTCAACCCGAGCTGCATTTGAAACTGCTGTGCTTGGTGCAGGAGGGTAAGCGGAATTCCTAGTGTAGCGGTG  
AAATGCGTAGATATTAGGAGGAACACCAGTGGCGAAGGCGGCTACTGGACACCAACTGACGCTGAGGCTCGAAAAGCATG  
GGTAG  
>ASV:6510:Genus:Subdoligranulum  
AACGTAGGGTCAAGCGTTGTCCGGAATTTATTGGGCGTAAAGAGCATGTAGGCGGCTTAATAAGTGCAGCGTGAAAATGC  
GGGGCTCAACCATAAATTGCTTTCAAAGTGCCTTGGTGCAGAGGTAAGTGGAAATTCCTAGTGTAGCGGTG  
GAATGCGTAGATATCGGGAGGAACACCAGTGGCGAAGGCGACCTACTGGGCACCAACTGACGCTGAGGCTCGAAAAGCATG  
GGTAG  
>ASV:6511:Genus:Alloprevotella  
AACGTATGTCGCAAGCGTTATCCGGATTTATTGGGCGTAAAGCGCGTCTAGGCGGTTTGTTAAGTCTGATGTGAAAATGC  
GGGGCTCAACCGTCCGACTGCATTTGATACTGGGAGTCTTGGTGCACACAGGGATGCTGGAATTCATGGTGTAGCGGTG  
AAATGCTCAGATATCATGAAGAACTCCGACCGGAAGGCGAGTATCCGGGGTCAACTGACGCTGAGGCTCGAAAAGTGC  
GGTAT  
>ASV:6512:Family:Lachnospiraceae  
TACGTAGGGAGCAAGCGTTATCCGGATTTACTGGGTGTAAGGGAGCGTAGACGGAGAGGCAAGTCTGATGTGAAAACCC  
GGGGCTCAACCCGGGACTGCATTTGAAACTGTTTTCTTAGAGTGTGCGGAGAGGCAAGTGGAAATTCCTAATGTAGCGGTG  
AAATGCGTAGATATTGGGAGGAACACCAGTGGCGAAGGCGGCTCTCTGGGCCGTTACTGACGCTGAGGAGCGAAAAGCGTG  
GGGAG  
>ASV:6513:Kingdom:Bacteria  
TACGTAGGGGGCGAGCGTTATCCGGATTTATTGGGCGTAAAGCGCGCTAGGCGGCCCGGAGGCCGGGGTTCGAAAGCGG  
GGGGCTCAACCTTCAGACTGCATTTGAAACTGCTTCTTGGTGAAGTAGAGGTAAGCGGAATTCCTAGTGTAGCGGTG  
GAATGCGTAGACATCGGGAGGAACACCAGTGGCGAAGGCGACCTACTGGGCACCAACTGACGCTGAGGCTCGAAAAGCATG  
GGTAG  
>ASV:6514:Family:Family\_XIII  
TACGTAGGGGGCGAGCGTTATCCGGAATTTACTGGGCGTAAAGAGTATGTAGGTGGTTAAGTAAAGCGTAGGGTTAAGGCG  
ACAGCCCAACTGTCTGATGCCCCGCGAACTGTTAACTTGGTACAGGAGGGGAAGGCGGAATTCCTAGTGTAGCGGTGA  
AATGCGTAGATATTAGGAGGAACACCAGTGGCGAAGGCGGCTTCTGGACTGTAAGTGCAGTGCAGTGCAGAAAGCGTGG  
GTAGC  
>ASV:6515:Order:Clostridiales  
TACGGAGGATCAAGCGTTATCCGGATTTATTGGGTTAAAGGGTGCCTAGGCGGCTGATAAGTTAGAGGTGAAATCCC  
GGGGCTTAACCCGGTACTGCATTTGAAACTGCTGGCCTTGGTGCAGAGGTAAGTGGAAATTCCTAGTGTAGCGGTG  
GAATGCGTAGATATCGGGAGGAACACCAGTGGCGAAGGCGGCTACTGGGCACCAACTGACGCTGAGGCGGAAAAGCATG  
GGTAG  
>ASV:6516:Family:Ruminococcaceae  
TCCTTCTTCTCTCTTTTTCCGGACTTACTGGGCGTAAAGGGTGCCTAGGCGGTTTGTTAAGTGCAGATGTGAAATACC  
CGGGCTTAACCTCTGGACTGCTTTTGAAGTGCAGAGCTTGGTGAAGTAGAGGCGAGGCGGAATTCCTAGTGTAGCGGTG  
AAATGCGTAGAGATGGGAGGAACACCAGTGGCGAAGGCGGCTGCTGGGCTTAACTGACGCTGAGGCTCGAAAAGCGTG  
GGGAG  
>ASV:6517:Order:Clostridiales  
TACGTAGGGAGCAAGCGTTATCCGGATTTATTGGGTTAAAGGGTGCCTAGGTTGGTATTTAAGTGCAGCGGTGAAAATTT  
GTGGCTCAACCCGGTACTGCATTTGAAACTGTTAAGCTTGGTGCAGGAGGGTAAGCGGAATTCCTAGTGTAGCGGTG  
AAATGCGTAGATATTAGGAGGAACATCAGTGGCGAAGGCGGCTTACTGGACTGAAACTGACACTGAGGACGAAAAGCGTG  
GGGAG  
>ASV:6518:Family:Family\_XIII  
TACGTAGGGGGCAAGCGTTATCCGGAATTTATTGGGCGTAAAGGGTGCCTAGGTTGGTCTACTAAGCGCGAGGTGAAAAGGCA  
ATGGCTCAACCATTTAGCTTGCAGAACTGGCAGACTTGGTGCAGAGAGGAAAGCGGAATTCCTAGTGTAGCGGTGA  
AATGCGCAGATATTAGGAGGAACACCAGGCGGCGAAGGCGGCTTCTGGATTGTAAGTGCAGTGCAGGACGAAAAGCGTG





GGGGCTCAACCCGGAATTGCTTTTAAACTGTCAGGCTAGAGTGTCGGAGGGTAAGCGGAATTCCTAGTGTAGCGGTG  
AAATGCGTAGATATACGGAGGAACACCAGTGGCGAAGGCGGCTGCTGGACATTAACGACGCTGAGGCGCAAAGCGTG  
GGGAG

>ASV:6533:Family:Erysipelotrichaceae

TACGTAGGTGGCAAGCGTTATCCGGAATTATTGGGCGTAAAGAGGGAGCAGGCGGCAATAAAGGTCTGTGGTAAAAGACT  
GAAGCTCAACTTCAGTAAGCCATGAAACAGATAGCTAGAGAGCAGTAGAGGATCGTGGAATTCATGTGTAGCGGTGA  
AATGCGTAGATATATGGAGGAACACCAGTGGCGAAGGCGACTCACTAGACTGTTACTGACACTGATGCTCGAAAGTGTGG  
GTATC

>ASV:6534:Genus:Butyricimonas

CACGGGGGATGCGAGCGTTATCCGATTTATTGGGTTAAAGGGCGCTAGGCGGAATGCCAAGTCAGCGGTAAAAGACT  
GCAGCTAAACTGTAGCACGCCGTTGAAACTGGCAATCTCGAGACGAGTCGAGGGAGGCGGAACAAGTGAAGTAGCGGTGA  
AATGCTTAGATATCACTTGGAAACCCGATAGCGAAGGCGACTTCCAGACTCGATCTGACGCTGATGCGCGAGAGCGTGG  
GTAGC

>ASV:6535:Family:Lachnospiraceae

TACGGAGGATCCGAGCGTTATCCGATTTATTGGGCGTAAAGCGCGTCTAGGCGGCTTAGTAAGTCTGATGTGAAATCCA  
CGGGCTCAACTCGTGAAGTGCATTTGAAACTGTTTTCTTGAGTATCGGAGAGGCAATCGGAATTCCTAGTGTAGCGGTG  
AAATGCGTAGATATTAGGAGGAACACCAGTGGCGAAGGCGGCTTACTGGACAGTAACGACGTTGAGGCTCGAAAGCGTG  
GGGAG

>ASV:6536:Genus:Oscillibacter

TACGTAGGTGGCAAGCGTTGTCCGGATTTACTGGGTGTAAGGGCGTGCAGCCGGGCTGGCAAGTCAGGCGTAAATCCC  
AGGGCTCAACCTGGAAGTGCCTTTGAAACTGCTGGTCTTGAGTACCGGAGAGGTCTATCGGAATTCCTTGTGTAGCGGCG  
AAATGCGTAGATATAAGGAAGAACACCAGTGGCGAAGGCGGATGACTGGACGGCAACTGACGTTGAGGCGCAAAGCGTG  
GGGAG

>ASV:6537:Genus:Asaccharospora

TACGTAGGGGCTAGCGTTATCCGATTTACTGGGCGTAAAGGGTGCCTAGGCGGCTTTTAAAGTCAGGAGTAAAAGGCT  
ACGGCTCAACCGTAGTAAGCTCTTGAAGTGGAGGACTTGAGTGCACAGAGGTAGGCGGAATTCGTGGTGTAGCGGTGA  
AATGCTTAGATATACGAAGAAGTCCGATTGCGAAGGCGACTTACCAAATATATCTGACGTTGAGGACGAAAAGCGTGG  
GGAGC

>ASV:6538:Genus:Anthococcus

TACGGAAGGTCGGGGCTTATCCGATTTATTGGGTGTAAGCGAGCGCAGGTGGTTTTATTAAGTCTGGTGTAAAAGGCA  
GTGGCTCAACCATTTGATGCATTGGAAGTGGTAGACTTGAGTGCAGGAGAGGAGAGTGAATTCATGTGTAGCAGTGA  
AATGCGTAGATATGCGGAAGAACACCAATGGCGAAGGCGCCCTCTGGGACATGACTGACGCTCATGCACGAAAAGCGTGG  
GGAGC

>ASV:6539:Genus:Coprobacter

TACGGAAGATGCGAGCGTTATCCGATTTATTGGGTTAAAGGGTGCCTAGGCGGAAGAATAAGTCAGCGGTGAAATGCT  
TCAGCTCAACTGGAGAATTGCCGATGAAACTGTTTTCTAGAGTATAAAGAGGTATGCGGAATGCGTGGTGTAGCGGTG  
AAATGCGTAGATATCGGGAGGAACACCAGTGGCGAAGGCGGCTTACTGGGCACCAACTGACGCTGAGGCTCGAAAGTGTG  
GGTAG

>ASV:6540:Family:Ruminococcaceae

AACGTAGGTCAACAAGCGTTGTCCGGATTTACTGGGTGTAAGGGCGCTAGGCGGACTGTCAAGTCAGTCTGAAATACC  
GGGGCTTAACCCGGGACTGCTTTTGAAGTGCAGGGCTAGAGTGCAGGAGGGGCAAGTGAATTCCTAGTGTAGCGGTG  
AAATGCGTAGATATTAGGAGGAACACCAGTGGCGAAGGCGGATTGCTGGACGACAACGACGTTGAGGCGCAAAGCGTG  
GGGAG

>ASV:6541:Family:Lachnospiraceae

TACGTAGGGGCAAGCGTTATCCGATTTACTGGGTGTAAGGGAGCGTAGACGGCATGGCAAGTCTGAAGTAAAATGCG  
GGGGCTCAACCCGGAAGTGCCTTTGAAACTGTCAGGCTGGAGTGCAGGAGAGGTAAGTGAATTCCTAGTGTAGCGGTG  
AAATGCGTAGATATTAGGAGGAACACCAGTGGCGAAGGCGGCTTACTGGACTGTAACGACACTGATGCTCGAAAGTGTG  
GGTAT

>ASV:6542:Order:Lactobacillales

TACGGAAGGTGCAAGCGTTAATCGGAATTTACTGGGCGTAAAGGGAGCGTAGACGGTGTGGCAAGTCTGATGTGAAAGGCA  
TGGGCTCAACCTGTGGACTGCATTGGAAGTGCATACTTGAGTGCAGAAGGGGAGAGTGAATTCATGTGTAGCGGTG  
AAATGCGTAGATATATGGAGGAACACCAGTGGCGAAGGCGGCTCTCTGGTCTGTAACGACGCTGAGGCTCGAAAGCGTG  
GGGAG

>ASV:6543:Order:Clostridiales

TACGGAAGGGGCAAGCGTTATCCGATTTACTGGGTGTAAGGGAGCGTAGACGGTGTGGCAAGTCTGATGTGAAAGGCA  
TGGGCTCAACCTGGGAAGTGCATTGGAAGTGGCAGGCTAGAGTCTTGTAGAGGGGGTAGAATTCCTGGTGTAGCGGTG  
GAATGCGTAGATATCGGGAGGAACACCAGTGGCGAAGGCGGCTTACTGGGCACCAACTGACGCTGAGGCTCGAAAGTGTG  
GGTAG

>ASV:6544:Order:Clostridiales

AACGGAGGATCCGAGCGTTATCCGATTTATTGGGTTAAAGGGAGCGTAGGTGGACTGGTAAGTCAAGTGTGAAAGTTT  
GCGGCTCAACCCGGGGCTGCATTTGAAACTGCCAGCTTAGAGTCCGGGAGAGGCGAGCGGAATTCCTAGTGTAGCGGTG  
AAATGCGTAGATATTAGGAGGAACACCAGTGGCGAAGGCGGCTTACTGGGCACCAACTGACGCTGAGGCTCGAAAGTGTG  
GGTAG

>ASV:6545:Genus:Turicibacter

TACGTAGGTGGCAAGCGTTGTCCGGAATTTACTGGGTGTAAGAGCGCGCAGGTGGTTGATTAAGTCTGATGTGAAAGCCC  
ACGGCTTAACCGTGGAGGGTCAATGGAACTGGTCGACTTGAGTGCAGAAGAGGGGAAGTGAATTCCTGTGTAGCGGTG  
AAATGCGTAGAGATATGGAGGAACACCAGTGGCGAAGGCGGCTTCTGGTCTGTAACGACGCTGAGGCGCAAAGCGTG  
GGGAG

>ASV:6546:Family:Ruminococcaceae  
TACGTAGGTGGCAAGCGTTATCCGGATTTACTGGGTGTAAGGGCGTGTAGGCGGGATTGCAAGTCAGATGTGAAAACCTG  
GGGGCTCAACCTCCAGCCTGCATTTGAAACTGTAGTCTTGAGTGCGGGAGAGGCAGATGGAATTCCTGGTGTAGGGGTA  
AAATCCGTAGATATCAAGAAGAATACCTATTGCGAAGGCGATCTGCTGGAACCTAACGACGCTGAGGCACGAAAGCGTG  
GGGAG

>ASV:6547:Family:Family\_XIII  
TACGGAGGATCCGAGCGTTATCCGGATTTATTGGGCGTAAAGAGTGCCTAGGTGGTTACCTAAGCGCAGGGTATAAGGCA  
ATGGCTCAACCTATTGTCGCCCTGCGAAGTGGGCTACTTGAGTGCAGGAGAGGAAAGCGGAATTCCTGGTGTAGCGGTG  
AATGCGTAGATATCGGGAGGAACACCAAGTGGCGAAGGCGGCTACTGGGCACTAACTGACGCTGAGGCTCGAAAGCATGG  
GTAGC

>ASV:6548:Family:Ruminococcaceae  
TACGTAGGGAGCAAGCGTTATCCGGATTTACTGGGTGTAAGGGGAGCGTAGACGGCGCAGCAAGTCTGATGTGAAAAGGCA  
GGGGCTTAACCCCTGGACTGCATTTGAAACTGTACTTCTTGAGTACTGGAGAGGCAGCGGAATTCCTGGTGTAGCGGTG  
AAATGCGTAGATATACGGAGGAACACCAAGTGGCGAAGGCGGCTACTGGGCACTAACTGACGCTGAGGCTCGAAAGCATGG  
GTAGC

>ASV:6549:Family:Ruminococcaceae  
TACGTAGGGAGCGAGCGTTGTCGGATTTACTGGGTGTAAGGGGAGCGTAGGCGGGACAGCAAGTCTGATGTGAGAAGT  
TGGGCTTAACCCCTGGACTGCATTTGAAACTGTACTTCTTGAGTACTGGAGAGGCAGCGGAATTCCTAGTGTAGCGGTG  
AAATGCGTAGATATACGGAGGAACACCAAGTGGCGAAGGCGGCTACTGGACTGTAAGTACTGACGCTGAGGCTCGAAAGCGTG  
GGGAG

>ASV:6550:Genus:Pseudoflavonifractor  
TACGTAGGTGGCAAGCGTTATCCGGATTTACTGGGTGTAAGGGGCGTGTAGGCGGGATTGCAAGTCAGATGTGAAAACCA  
CGGGCTCAACCTGTGGCTGCATTTGAAACTGCAGTTCGAGTACTGGAGAGGCAGACGGAATTCCTAGTGTAGCGGTG  
AAATGCGTAGATATCACGAAGAATCCGATTGCGAAGGCGGCTACTAGACTGTTACTGACACTGATGCTCGAAAGTGTG  
GGTAT

>ASV:6551:Genus:Erysipelatoclostridium  
TACGTAGGTGGCGAGCGTTATCCGGATTTACTGGGTGTAAGGGGAGCAGGCGGGCAGAGGCTGTGGTAAAAGACT  
GAAGCTTAACCTCAGTAAGCCATAGAAACCGGGCTGCTAGAGTGCAGGAGAGGATCGTGGAATTCCTAGTGTAGCGGTG  
AATGCGTAGATATCGGGAGGAACACTCGTGGCGAAGGCGGTTCTTGACATTAAGTACTGACGCTGAGGCACGAAAGCCAGG  
GGAGC

>ASV:6552:Family:Lachnospiraceae  
TACGTAGTGGGCAAGCGTTATCCGGATTTACTGGGTGTAAGGGGAGCGTAGACGGAACAGCAAGTCTGATGTGAAAACCC  
GGGGCTCAACCCCGGGACTGCATTTGAAACTGTTGATCTAGAGTGTGCGGAGAGGTAAGTGAATTCCTAGTGTAGCGGTG  
AAATGCGTAGATATAGGAGGAACACCGATTGCGAAGGCGGCTACTAGACTGTCACTGACACTGATGCTCGAAAGTGTG  
GGTAT

>ASV:6553:Genus:Ruminococcaceae\_UCG-013  
TACGTAGGTGGCGAGCGTTGTCGGATTTACTGGGTGTAAGGGGCGTGTAGGCGGGACTGCAAGTCAGATGTGAAATACC  
GGGGCTCAACCCCGGGCTGCATTTGAAACTGTGTTCTTGAGTGCGGGAGAGGAAAGCGGAATTCCTAGTGTAGCGGTG  
AAATGCGTAGATATAGGAGGAACACCGTGGCGAAGGCGGTTCTTGACCTAACTGACGCTGAGGCACGAAAGCGTG  
GGTAG

>ASV:6554:Family:Lachnospiraceae  
TACGTATGGTGCAGCGTTATCTGGATTTACTGGGTGTAAGGGGAGCGCAGGCGGTACGGCAAGTCTGATGTGAAAACCC  
GGGGCTCAACCCCGGTACTGCATTTGAAACTGTCGGACTAGAGTGTGCGGAGGGTAAGTGAATTCCTAGTGTAGCGGTG  
GAATGCGCAGATATCGGAAGAACACCGATGGCGAAGGCGGCTGCTGGGCCCAACTGACGCTGATGCTCGAAAGTGTG  
GGTAT

>ASV:6555:Genus:Peptoclostridium  
TACGTAGGGGCTAGCGTTATCCGGATTTACTGGGCGTAAAGGGTGCCTAGGCGGTTCTTCAAGTCAGGAGTTAAAGGCT  
ACGGCTCAACCGTAGTAAGCTCCTGATACTGTCTGACTTGAGTGCAGGAGAGGAAAGCGGAATTCCTAGTGTAGCGGTG  
AATGCGTAGATATTGGGAGGAACACCAAGTGGCGAAGGCGGTTCTTGACTGTAAGTACTGACGCTGAGGCACGAAAGCGTG  
GGAGC

>ASV:6556:Genus:Varibaculum  
TACGTAGGGCGCGAGCGTTATCCGGAATTTATTGGGCGTAAAGGGCTTGTAGGTGGCTGGTTGCGTCTGTGCGTAAAAGCTC  
ATGGCTTAACCTGTGGTTTGGCGGTGGTACGGGCTGGCTTGGTACAGTAGAGGTGGGCGGAATTCGTGGTGTAGCGGTG  
AAATGCTTAGATATCACGAAGAATCCGATTGCGAAGGCGGCTACTGGACTGCAACTGACGCTGAGGCTCGAAAGTGTG  
GGTAT

>ASV:6557:Order:Bacteroidales  
TACGGAGGATGCGAGCGTTGTCGGATTTATTGGGTTAAAGGGAGCGTAGGTGGATTGTTAAGTCAAGTGTGAAAAGTTT  
GCGGCTCAACCGTAAATTCAGTTGAAACTGTCATACTTGAGTCCCGGAGGGGTAAGCGGAATTCCTAGTGTAGCGGTG  
AAATGCGTAGATATTAGGAGGAACACCAAGTGGCGAAGGCGGTTACTGGACTGTAAGTACTGACGCTGATGCTCGAAAGTGTG  
GGTAT

>ASV:6558:Genus:Prevotella\_6  
TACGGAAGGTCCGGGCTTATCCGGATTTATTGGGTTAAAGGGAGCGTAGGCGGTTAAGTGTGTTGTAATCCG  
GTTGCTCAACATCCGGTTTGCAGCGCATACTGCCACTTGAGTCCGCACAACGAGGCGGAATTCGTGCTGTAGCGGTG  
AAATGCTTAGATATCACTTGAACCCGATAGCGAAGGCGGTTCCAGGCTCGTTCTGACGCTGATGCGCGAGAGCGTG  
GGTAG

>ASV:6559:Genus:Pseudomonas  
TACGGAGGGTCAAGCGTTAATCCGGAATTTACTGGGCGTAAAGCGCGGCTAGGTGGTTTGTAAAGTGGATGTGAAATCC  
CGGGCTCAACCTGGGAAGTGCATTTGAAACTGACTGACTAGAGTATGGTAGAGGGTGGTGAATTCCTGTGTAGCGGTG

AAATGCGTAGATATAGGAAGGAACACCAGTGGCGAAGGCGACCACCTGGACCAATACTGACACTGGGGTGCGAAAGCGTG  
GGGAG  
>ASV:6560:Class:Bacteroidia  
TACGTAGGGAGCAAACGTTGTCCGGATTTACTGGGTGTAAGGGTGCCTAGGCGGCTTTGCAAGTCAGATGTGAAATCTA  
TGGGCTCAACCATAAACTGCATTTGAAACTGTAGAGCTTGTAGTGAAGTAGAGGCAGGCGGAACAAGTGAAGTAGCGGTG  
AAATGCATAGATATCACTTGGAAACCCGATAGCGAAGGCAGCTTCCAGGCTCGTTCTGACGCTGATGCGCGAGAGCGTG  
GGTAG  
>ASV:6561:Genus:Acetanaerobacterium  
TACGTAGGTGGCAAGCGTTGTCCGGAACTTACTGGGTGTAAGGGAGCGTAGGCGGCTTTGCAAGTTGAATGTTAAACTA  
TCGGCTTAACTGGTAGTCGCTTCAAACCTGCAGGACTTGTAGTGAAGTAGAGGCAGGCGGTTTCCCGGTGTAGCGGTGA  
AATGCGTAGATATCGGGAGGAACACCAGTGGCGAAGGCGGCTTCTGGGCTTTTACTGACGCTGAGGCTCGAAAGTGTG  
GGAGC  
>ASV:6562:Genus:Corynebacterium\_1  
TACGTAGGGTGCAGCGTTGTCCGGAACTTACTGGGCGTAAAGGGCTCGTAGGTGTTTGTCCGCTCGTCTGTGAAATTC  
GGGGCTTAACTCCGGGCGTGCAGGCGATACGGGCATAACTTGTAGTGTGTAGGGTAAGTGAATTCCTGGTGTAGCGGT  
GAAATGCGCAGATATCAGGAGGAACACCAGTGGCGAAGGCGAGTTACTGGATTGTAAGTGTGACGCTGATGCTCGAAAGTGT  
GGTA  
>ASV:6563:Family:Ruminococcaceae  
AACGTAGGGTGAAGCGTTGTCCGGAACTTACTGGGTGTAAGGGAGCGCAGGTGGATTGGCAAGTTGGGAGTGAAACTA  
AGGGCTCAACCATAGATTGCATCTGAAACTGATATGCTTGTAGTCAAGGAGAGGAAAGTGAATTCCTAGTGTAGCGGTG  
AAATGCGTAGATATTAGGAGGAACACCAGTGGCGAAGGCGGATTGCTGGACGACAAGTGTGACGCTGAGGCGCAAGCGTG  
GGGAG  
>ASV:6564:Species:matruhotii  
TACGTAGGGTGCAGCGTTGTCCGGAACTTACTGGGCGTAAAGAGCTCGTAGGTGTTTGTTCGCTCGTCTGTGAAATTC  
GGGGCTTAACTCCGGGCTGCAGGCGATACGGGCATAACTTAGAGTGTGTAGGGGAGACTGGAATTCCTGGTGTAGCGGT  
GGAATGCGCAGATATCAGGAGGAACACCAGTGGCGAAGGCGAGTCTCTGGGCGTAAGTGTGACGCTGAGGAGCGAAAGCAT  
GGGA  
>ASV:6565:Family:Ruminococcaceae  
TACGTAGGGAGCGAGCGTTGTCCGGATTTACTGGGTGTAAGGGTGCCTAGGCGGGTCCGCAAGTCAGATGTGAAATACC  
GGGGCTTAACTCCGGGCTGCATTTGAAACTGTTTTTCTTGTAGTATCGGAGAGGCAATCGGAATTCCTAGTGTAGCGGTG  
AAATGCGTAGATATTAGGAGGAACACCAGTGGCGAAGGCGGATTGCTGGACGACAAGTGTGACGCTGAGGCGCAAGCGTG  
GGTAG  
>ASV:6566:Family:Ruminococcaceae  
TACGTAGGTGGCGAGCGTTGTCCGGAACTTATGGGCGTAAAGGAGCATGTAGGCGGCTTAATAAGTCAGAGCGTGAAATGC  
GGGGCTCAACCATAAACTGCATTTGAAACTGTAGAGCTTGTAGTGAAGTAGAGGCAGGCGGAATTCCTCGTGTAGCGGTG  
AAATGCGTAGAGATGGGAGGAACACCAGTGGCGAAGGCGGCTGCTGGGCTTAACTGACGCTGAGGCGCAAGCGTG  
GGTAG  
>ASV:6567:Family:Peptococcaceae  
TACGTAGGGGCGAGCGTTGTCCGGAACTTACTGGGCGTAAAGGGCGCTAGGCGGCAATATAAGTCAGATGTGAAAGGTG  
AGGGCTCAACCCTTAGACTGCATCTGATACTGTATAGCTTGTAGTGTGAGAGAGGAAAGCGGAATTCCTAGTGTAGCGGTG  
AAATGCGTAGATATTAGGAGGAACACCAGTGGCGAAGGCGGCTTCTGGCTCATAACTGACGCTGAGGCGCAAGCGTG  
GGTAG  
>ASV:6568:Genus:Pseudoflavonifractor  
TACGTAGGTGACAAGCGTTATCCGGATTTACTGGGTGTAAGGGAGCGTAGACGGTGTGGCAAGTCTGATGTGAAAGGCA  
TGGGCTCAACCTGTGGACTGCATTTGAAACTGTAGTCTTGTAGTGTGGAGAGGCAATCGGAATTCCTGTGTAGCGGTG  
AAATGCTTAGATATCACGAAGAACTCCGATTGCGAAGGCGAGTACTGGACTGTAAGTGTGACGCTGATGCTCGAAAGTGTG  
GGTAG  
>ASV:6569:Family:Ruminococcaceae  
TACGGAGGATCCGAGCGTTATCCGGATTTACTGGGTGTAAGGGCGCGTAGGCGGACTGTCAAGTCAGTCTGAAATACC  
GGGGCTTAAACCCGGGCTGCAGTGAAGTGTGACAGCCTTGTAGTATCGGAGAGGAAAGCGGAATTCCTAGTGTAGCGGTG  
AAATGCGTAGAGATCTGGAGGAATACCGGTGGCGAAGGCGGCCCCCTGGACAAGACTGACGCTCAGGTGCGAAAGCGTG  
GGGAG  
>ASV:6570:Class:Bacteroidia  
TCCGGCGTCTCCTCTCTTTCTCCGGCTTTCTTGGGTTAAAGGGAGCGTAGGTGGACAGTAAAGTCAGTGTGAAAGTTT  
GCGGCTCAACCGTAAATTTGAGTTGATACTGGCTGTCTTGTAGTACAGTAGAGGTGGGCGGAATTCAGTGTAGCGGTG  
AAATGCGTAGATATTCGGAGGAACACCAGTGGCGAAGGCGGCAACTGGGCTTAACTGACGCTGAGGCTCGAAAGTGTG  
GGTAT  
>ASV:6571:Genus:Anaerofilum  
TACGTATGGTGAAGCGTTATCCGGATTTACTGGGTGTAAGGGAGCGCAGGCGGAGCTGTAAGTTGGGCGTCAAATCTA  
CGGGCTTAAACCGTATCCGCGCTCAAACCTGTGGCTTGTAGTGTAGTGCAGAGGTAGGTGGAATTCCTGGTGTAGCGGTG  
AATGCGTAGATATCGGGAGGAACACCAGTGGCGAAGGCGGCTTACTGGGACCAACTGACGCTGAGGCTCGAAAGTATGG  
GTAGC  
>ASV:6572:Family:Ruminococcaceae  
TACGTAGGGAGCAAAGCGTTGTCCGGATTTACTGGGTGTAAGGGTGCCTAGGCGGCTAGGCAAGTCAGAGCTGAAACCA  
TGGGCTCAACCTGTGGACTGCGTTTGAAGTGTGGTCTTGTAGTATCGGAGAGGTAATCGGAATTCCTGTGTAGCGGTG  
AAATGCGTAGATATTAGGAGGAACACCAGTGGCGAAGGCGGCTTCTGGACGACAAGTGTGACGCTGAGGCGCAAGCGTG  
GGGAG  
>ASV:6573:Family:Ruminococcaceae

TACGGAGGATCCGAGCGTTATCCGGATTTATTGGGTTTAAAGGGAGCGTAGGCGGGTTGTTAAGTCAGTTGTGAAATCTA  
TGGGCTCAACCATAAACTGCTTTCAAACCTGTTTTCTTGAGTAGTGCAGAGGTAGGCGGAATCCCGGTGTAGCGGTG  
GAATGCGTAGAGATCGGGAGGAACACCAGTGGCGAAGGCGGCCTGCTGGGCCTTAAC TGACGCTGAGGCACGAAAGCATG  
GGTAG

>ASV:6574:Family:Saccharimonadaceae

TACGTAGGGTGCAAGCATTATCCGGAGTGACTGGGCGTAAAGAGTTGCGTAGGCGGTTAATAAGTGAATAGTGAAACCT  
GGTGGCTCAACCATACAGACTATTATTCAAACCTGTTAAACTCGAGAATGGTAGAGGTAAC TGAATTTCTAGTGTAGGAG  
TGAAATCCGTAGATATTAGAAGGAACCCGATGGCGTAGGCAGGTTACTGGGCCATTTCTGACGCTAAGGCACGAAAGCG  
TGGGG
