# Supplementary material for: Lupus nephritis is linked to disease-activity associated expansions and immunity to a gut commensal
Source: PubMed Central journal article supplement — Ann Rheum Dis. 2019 Feb 19;78(7):947–56. doi: 10.1136/annrheumdis-2018-214856 (PMC6585303; doi:10.1136/annrheumdis-2018-214856), 2019-02-19
Supplement: annrheumdis-2018-214856supp007.pdf [file annrheumdis-2018-214856supp007.pdf]

Supplementary Table 5. Strains of *Ruminococcus gnavus* used in these studies.

| Number | Strain designation   | Origin                                         |
|--------|----------------------|------------------------------------------------|
| 1      | VPI C7-9 (from ATCC) | Human stool                                    |
| 2      | CC55_001C (from BEI) | Colonic biopsy                                 |
| 3      | CD1 FAA 3            | Crohn's Disease community 1 – mucosal biopsy   |
| 4      | 32-6-I 9 D6 FAA AN   | Healthy Donor 6- feces                         |
| 5      | 2/1/58FAA            | IBD Patient 58 -mucosal biopsy                 |
| 6      | UC2 D5 FAA 1         | Ulcerative colitis community 2 -mucosal biopsy |
| 7      | OB21_GAM_25_AN       | Obese community 1 -feces                       |
| 8      | WAL 14576            | Finegold lab isolate - feces                   |

Assignment to the *R. gnavus* species was made by the source laboratory and confirmed with an established PCR assay <sup>1</sup>.

1. Png, C.W., *et al.* Mucolytic bacteria with increased prevalence in IBD mucosa augment in vitro utilization of mucin by other bacteria. *Am J Gastroenterol* **105**, 2420-2428 (2010).
